# Supplementary material for: Novel robust biomarkers for human bladder cancer based on activation of intracellular signaling pathways
Source: PubMed Central journal article supplement (PMC4253415; doi:10.18632/oncotarget.2493), 2014-09-16
Supplement: oncotarget-05-9022-s002.pdf [file oncotarget-05-9022-s002.pdf]

| SYMBOL  | Tumour_X1.2.AVG_Signal | Tumour_X2.AVG_Signal | Tumour_X3.AVG_Signal | Tumour_X4.AVG_Signal | Tumour_X5.AVG_Signal | Tumour_X6.AVG_Signal | Tumour_X7.AVG_Signal | Tumour_X8.AVG_Signal | Tumour_X2.2.AVG_Signal | Normal_X10.AVG_Signal | Normal_X11.AVG_Signal | Normal_X12.AVG_Signal |
|---------|------------------------|----------------------|----------------------|----------------------|----------------------|----------------------|----------------------|----------------------|------------------------|-----------------------|-----------------------|-----------------------|
| 7A5     | 42.2455707947223       | 37.2810767789306     | 39.6451483836089     | 35.314469458379      | 36.08956004634       | 37.9951997351435     | 36.9355798143571     | 36.3405039629059     | 35.6139301508335       | 36.4651112441576      | 41.0808257270221      | 42.1537476443423      |
| A1BG    | 41.5421429082231       | 45.6948619492056     | 44.5134109184888     | 41.4727452533295     | 45.6895223823001     | 41.554942319225      | 40.8681871019812     | 43.0390857698452     | 45.2421183842044       | 42.2614524730856      | 41.7627910693483      | 46.4952206446229      |
| A1CF    | 45.3872406432794       | 50.4872122867759     | 42.6981470312295     | 40.2427205947092     | 40.7176735294868     | 40.800866389165      | 42.7431359850339     | 41.599960574499      | 38.2795150354677       | 38.9271399577966      | 41.1367478979484      | 40.4639532172338      |
| A26A1   | 41.483412492426        | 41.8848959280916     | 43.8153459269057     | 44.7401523707775     | 40.8873907150245     | 43.3269087731399     | 42.9803717121865     | 44.5658219748173     | 38.0213051227859       | 39.6719190054379      | 41.7272875295469      | 43.1805016690297      |
| A26B1   | 40.0557788909923       | 35.9305494063137     | 44.9758339877851     | 38.3166554965434     | 38.9496515344837     | 43.1826328292558     | 40.1235656101329     | 44.0390019242862     | 38.9834959368496       | 43.1839109702714      | 37.6484782516569      | 39.1553169409075      |
| A26C1B  | 45.3872406432794       | 40.148780650831      | 43.7630587657205     |                      | 49.1786207920603     | 45.1137938810047     | 39.7394181011603     | 46.8613212048981     | 42.357910063876        | 40.4997186069494      | 43.9450023643394      | 42.5426057453993      |
|         | 45.8546719310325       |                      |                      |                      |                      |                      |                      |                      |                        |                       |                       |                       |
| A26C3   | 44.6231541342          | 41.5061991514748     | 44.7829632472754     | 48.7860245405122     | 46.2560238004757     | 44.8142634024197     | 45.8204185866107     | 44.0687697278114     | 50.9493788151501       | 46.0119912782855      | 42.2455707947223      | 45.3763275588341      |
| A2BP1   | 40.018129854           | 41.433180957815      | 38.741573807882      | 39.2336402665402     | 39.8278057109141     | 39.1685416657025     | 41.2927600802729     | 37.3925854497082     | 36.4747777548802       | 42.447226754834       | 42.4580504587581      | 40.8277078176464      |
| A2M     | 239.023368693467       | 227.567182783564     | 313.233036704221     | 270.202959012185     | 182.06733830953      | 396.167219131922     | 57.8870110456492     | 608.886783362316     | 56.7991853808475       | 369.717462266442      | 448.923538083456      | 300.412043023998      |
| A2ML1   | 193.262615637464       | 45.1694246393676     | 45.8844325913247     | 44.1483976313959     | 43.004943518025      | 40.650742261428      | 199.404836798715     | 170.475212920685     | 81.7566533443175       | 48.8623729374733      | 58.7389869173495      | 43.3744503319109      |
| A3GALT2 | 37.1485601150873       | 39.3667161654772     | 38.35720098134       |                      | 37.8129870676592     | 41.3387790895716     | 40.5281496800812     | 43.9450023643394     | 39.0620487644635       | 40.8420925848403      | 39.8455060654531      | 39.7576136507593      |
|         | 41.9083581529276       |                      |                      |                      |                      |                      |                      |                      |                        |                       |                       |                       |
| A4GNT   | 33.2552842693684       | 41.7337506166619     | 40.4070046183108     | 32.9046688061235     | 36.8059561571675     | 44.6524308640784     | 37.0564573649223     | 41.0381860307445     | 42.5406888281114       | 40.6022003765153      | 38.5668610487033      | 48.1627097465883      |
| AAAS    | 66.6547247910487       | 60.3093790894864     | 54.6820069269589     | 63.6334154351075     | 65.0605897122361     | 58.7404123614695     | 68.2708120569221     | 74.383456365584      | 71.787754116845        | 71.5032996449402      | 64.2174369755376      | 57.0524725494273      |
| AACS    | 91.6826894933058       | 86.4898752526885     | 91.8533850418261     | 61.2213001749372     | 80.7321212028516     | 64.7905331739366     | 113.322929203297     | 78.9900928241723     | 145.607100979838       | 74.2379710965903      | 82.5225075943931      | 66.8026147385682      |
| AACSL   | 42.1537476443423       | 41.159706131351      | 36.769073068743      | 49.9014504704021     | 38.9496515344837     | 43.4681646416585     | 44.4639405506967     | 44.9977782988116     | 36.5393857306744       | 41.5435611403119      | 42.8263096141654      | 42.1537476443423      |

AADAC 81.4269715766354 46.6996902348633 47.2962360458401 42.357910063876  
348.65230953701 66.4015820814547 43.4544762830742 72.4834467838798  
66.603126065489 45.7911932481722 65.5386366902998 49.2064066614865  
AADACL1 95.1037791424727 80.5412889315011 70.6065558064758  
165.121380058529 98.0143500562821 71.0197205018137 127.49459343016  
136.190823415283 109.029196594263 117.586275152761 97.5534379346899  
81.6458112867541  
AADACL2 41.8409927585705 39.6995529770239 38.7745734037492  
44.0451487108213 52.4370718282084 52.7156971154405 43.6753843488695  
46.695848687694 45.5779686360641 47.7180816682562 42.7275315121163  
60.5948704279864  
AADACL3 42.0532901689036 39.7835513496873 42.0621425894624  
46.4555908533915 40.3452320167286 37.1317006162938 43.6753843488695  
43.844855336215 45.6582729799009 45.7911932481722 41.6336636285875  
47.7962548556026  
AADACL4 41.5421429082231 41.159706131351 37.8386378737561  
51.3851157261451 32.8704945047196 41.6590564937735 33.2425023465738  
32.229154316188 35.1155486926999 43.0919221375514 32.775958132716  
37.5556299264699  
AADAT 112.591529656786 90.1284518302601 63.0670482657086 43.3497340062963  
91.1674392930267 55.9351706773613 80.7168944828052 56.6135586098886  
64.5598765457963 66.3230625217466 56.8056093987178 56.1404433602127  
AAK1 44.7044140979108 51.7495306734657 52.6275131390249 46.1148643659988  
53.4109882045447 47.428201097025 43.0177448037924 63.9851732498913  
44.0383630714326 45.3872406432794 54.4825201506931 54.1090536870282  
AAMP 122.495387796233 95.39134217438 104.037949992458 101.250422688816  
125.052841200703 115.044790975532 101.716697533604 128.996351661564  
116.949813289388 116.311176407088 133.549684980003 118.696127260286  
AANAT 41.1523487516364 43.3458769998118 39.7411455670172 37.7469621225553  
36.4434672195785 33.6859433472087 37.9430145836712 37.1317006162938  
38.1169703906207 40.5090849993014 31.9682164860619 36.064718696392  
AARS 799.803676957263 883.06773454117 1279.02702402372 996.520340280883  
742.726253630865 1060.64261592822 1212.61529575798 863.082385199922  
1457.72260892651 1043.26325848938 1068.10627239579 886.75789054784  
AARS2 97.3929166450379 86.277692569799 65.9476039189301 89.4504034432321  
107.294098632695 76.0240426902567 84.7782034884529 76.4637616585578  
101.81885073944 89.6670947876322 92.7667038784226 82.4362183543935  
AARSD1 189.267281390459 135.836577310513 179.694413858411  
169.144145421022 237.161912299581 203.178221073902 222.01145815859  
227.791956085471 227.439319520245 249.679512440891 272.604402990069  
210.255784687052  
AASDH 58.4920021605316 90.8550873130713 91.3890908971311 66.0397471691747  
126.088821850066 85.6038071277319 86.0796981361148 71.6202385170491  
77.1767494799711 120.692330556005 108.407179111715 90.0942781313264  
AASDHPPT 97.9401338178996 108.806649898122 127.789065386943  
72.1401612718245 129.179537795204 102.282066142307 89.9929484069346  
96.7280766051052 95.8446272966902 84.5411149237799 106.654782265295  
115.861269747317  
AASS 49.9718538204798 47.6914221838216 51.5822637582617 44.3638402537972  
61.3851695159988 63.1091746640396 46.0817481577316 49.5185112777773  
69.2685201884906 54.4825201506931 58.0295642638519 55.1109784383525  
AATF 336.737571879156 298.848001894468 304.718140992378 377.221676837377  
357.507822825765 404.599730419192 644.924175130155 399.027079798213  
486.044304392285 351.439404852971 335.881117053472 244.529657015078

AATK 44.4581200816365 43.8163035242859 41.0705134231814 41.5464765641928  
38.8964578286293 40.9506062495231 44.6032218589199 45.7030835309976  
40.2669497398702 41.7877325563821 39.8617019260946 40.2250934110735  
ABAT 38.385865183581 45.7562276914441 46.9040704638073 43.2427390263564  
43.4812166409346 39.5637454855233 42.6981470312295 41.2551966132486  
44.7058233759912 47.7779356299965 45.5106666933411 41.800198520267  
ABCA1 420.761600667193 281.452208033175 158.702003835578 752.837247653926  
306.115856873599 582.511224532378 263.706801812277 440.728435508514  
240.139560726101 619.950241162173 361.861166927682 315.186937216422  
ABCA10 44.1737502492846 46.6598879466655 49.3000844711116  
41.3567204694281 44.0977148249302 41.5132248356707 44.7255207589606  
41.5934628038429 45.2897806651929 37.2686490268265 49.1067959632109  
43.4709415392696  
ABCA11 42.0532901689036 50.4872122867759 41.9666541498638  
37.5382094267692 51.3511088648386 54.5952754712007 38.8417151851134  
41.3506832276112 49.5539622682049 48.1392888470269 49.1067959632109  
44.7401523707775  
ABCA12 45.7356815244513 41.8073910693411 38.8775560911841  
40.0322420615846 45.1137938810047 38.385865183581 38.5474297403025  
41.0844534776541 43.7078399718247 42.8414096678708 38.0365987358005  
40.2237056928605  
ABCA13 41.8409927585705 43.2649781354792 41.1367478979484  
42.0102671859606 46.6397391251762 40.244271403831 41.8315602975157  
43.6434576713809 53.4604353973381 42.1622837416589 39.3667161654772  
34.9138625012006  
ABCA2 49.9419897484381 51.909968572392 45.2640606138546 49.6479308322777  
41.7929491793697 43.5752393599169 39.5496902678788 44.5029690493211  
41.074824727477 46.6598879466655 50.1649089793069 48.9088046212958  
ABCA3 41.0608773166058 46.9919960628953 38.6727842796202 46.1673159982664  
40.2449343247539 52.3187919317561 41.706879587091 48.87875862356  
38.7298222155532 55.4037482627222 54.6089451252049 50.379587451669  
ABCA4 69.3418521417182 66.0147097736612 70.9377012403023 71.5249259772583  
79.1039287828151 60.877229406755 79.7564155881026 65.3019328668633  
65.1424206085551 63.9129423266349 53.2083147523758 59.7999569757275  
ABCA5 39.5676051939342 41.5061991514748 40.7620472083159 39.3513480332078  
36.8428706077385 40.800866389165 39.5496902678788 43.5738557773903  
42.7150227340364 49.5839230147011 46.4753015651202 45.1735152121056  
ABCA6 45.2875173643252 68.3864191351179 139.328628553223 65.524821699432  
52.2089306840125 188.008141649466 61.7572675712557 44.2527566343661  
48.0163377492228 120.943323740458 130.524308471577 229.379918828848  
ABCA7 64.3502363726659 52.3660712483179 58.7992572743257 74.9661773375536  
75.2977438265751 44.931941140132 65.7873990226533 72.7934987008399  
65.6810122794645 60.391458857108 59.8070012006708 59.2659299592508  
ABCA8 40.6062943725118 46.6314009405034 44.7829632472754 46.546116650292  
133.244526666651 200.41782363596 43.8206425661746 59.9682734755814  
45.1569741609597 116.891649452816 139.294987640071 98.5663841503803  
ABCA9 39.3709357615493 51.0175677516029 66.2167164788023 43.6726153508978  
55.6069214673486 97.8915084053153 40.6750540874299 40.5158867964016  
44.7771939752086 49.5265949137207 55.1099824417989 54.2746621762462  
ABCB1 41.9918605927928 54.9821263631962 55.5567699051046 75.1163398247735  
44.5092684716474 57.8944021095265 45.0283997415478 58.676230030835  
42.846832824953 54.3554233228353 66.7106881373359 54.5921287593554  
ABCB10 57.0006212637829 86.1924491308234 126.578693258328  
71.9062462001972 92.5135737873857 89.9789975503195 98.0023132593711

61.016921238986 77.9978216366573 89.3011777476649 82.2519263268941  
118.044483475719  
ABCB11 48.8941062980393 41.9894412416874 41.6977706798234  
45.7397504535169 47.5647821785529 44.6524308640784 44.4639405506967  
42.2577689927563 44.5303781239209 49.3000844711116 44.7926323492519  
43.5738557773903  
ABCB4 40.4639532172338 42.8542642792862 41.8751578329365 48.1662933382789  
37.1565984182084 40.5281496800812 38.4005795891396 41.5464765641928  
42.8036731479932 53.9412154719864 41.9083581529276 41.7575097298927  
ABCB5 41.2424637338424 37.5469247328848 37.2838080935695 36.0481934423077  
41.0885562160946 45.6129956328415 35.3362091871364 37.33030683349  
42.6366765186182 37.5343260962758 35.3362091871364 38.3291713594599  
ABCB6 100.663054866186 141.319488024794 136.125236142909 72.0694688774804  
195.127419251015 127.701556328274 105.945216149549 133.211237782894  
75.4572860692649 312.154320305976 232.628747594691 167.639975497722  
ABCB7 86.6655289455628 69.4820178305563 61.356483470053 92.6230008876347  
62.1836961153924 87.6507489853626 74.0039764902057 106.78552222475  
80.2680308979464 99.548445157506 112.881899194726 101.627551729492  
ABCB8 47.0940613507321 48.5905518770847 44.6032218589199 50.2163892855092  
49.1928206164702 43.2805590023412 42.7431359850339 44.4031868028216  
58.2401724760744 41.1222709786153 47.2134341420411 45.0985088502363  
ABCB9 109.832638804839 71.599955759893 95.2367177680328 66.224559122062  
79.2185250088688 55.1037284831588 100.499763255098 74.2517888452553  
141.594428857706 58.0218262176065 52.8190882379316 58.174555206394  
ABCC1 59.6008106247114 53.3974326903004 66.4079972657486 52.7787010032051  
60.3768221891131 53.6858208094027 48.4099370357307 52.6960621424156  
67.8688083153991 49.8393069675192 55.7868713984479 54.1440452292081  
ABCC10 70.9419509323007 56.3560498705517 60.9621846036092  
56.9299697426319 63.5932443357808 49.9699131196797 60.7992483126292  
53.9465584609317 56.0496524902806 68.6788460999238 66.8842530423095  
55.3563533836982  
ABCC11 41.8890826572422 44.3236524597291 47.834436078111  
46.1148643659988 42.9775348174342 46.0867976914262 43.1696495767273  
45.7476095696859 44.8997235283254 44.7958122466628 40.4057097917487  
42.357910063876  
ABCC12 48.1952521496489 52.0268699306396 47.0055981216687  
44.550322123994 60.5290966885203 50.9724155054821 49.3854238365325  
47.7889447429963 51.3511088648386 52.5522545249206 43.5710871617107  
49.6629259325705  
ABCC13 44.7915315085948 48.8842909466002 47.5673419710251  
45.0798408927912 47.0533794594844 42.157627240486 46.0905079010237  
44.3550497419584 45.8803291099765 43.4885245598939 48.0901896064056  
45.4799270968969  
ABCC2 47.1962846565261 45.4143854024453 46.3411353377615 64.0903425729408  
43.3332476888305 48.3686935595826 54.8074655158941 45.1714698794331  
43.8482802038826 47.0055981216687 45.2265319826548 40.5703581862752  
ABCC3 384.280434953152 574.467486140819 1226.43929953115 129.005213737493  
268.309382865636 61.9432904657734 113.198141130994 270.662475158799  
234.778900405354 647.868022835702 595.790464730847 911.661341702443  
ABCC4 71.2963721541702 113.866742186841 59.1533197797534 90.1632837282491  
81.8837844326824 83.6351558609087 66.8475050031365 81.3978207813439  
92.0711167984454 162.955976144315 148.32293918881 312.015358620043

|       |                  |                  |                  |                  |
|-------|------------------|------------------|------------------|------------------|
| ABCC5 | 159.554916039519 | 238.893145911331 | 522.125691279772 | 82.5279746006378 |
|       | 253.527553472516 | 94.8556191290544 | 120.721482177994 | 167.47269732721  |
|       | 239.569514501529 | 570.824732318332 | 349.90835241442  | 252.870708814507 |
| ABCC6 | 42.6575535390785 | 38.861780967827  | 38.3541523698926 | 39.5558610526094 |
|       | 39.3133871964036 | 41.8871259674102 | 40.1572444265517 | 42.0847226073592 |
|       | 39.3592387366314 | 40.4488698263442 | 41.6336636285875 | 39.6938066205531 |
| ABCC8 | 39.5676051939342 | 34.7135536792489 | 41.6079958749402 | 38.6414316877471 |
|       | 39.1650142708257 | 43.5752393599169 | 35.9894133432376 | 43.4544762830742 |
|       | 39.4762546236449 | 41.7405682794166 | 40.547835538778  | 34.806104801006  |
| ABCC9 | 43.3085358214154 | 42.7303139017786 | 40.8860076320216 | 40.9157352260901 |
|       | 40.0266778690352 | 48.6621527194963 | 39.6222000738266 | 41.599960574499  |
|       | 41.3481355128089 | 44.3046896365956 | 44.4688999098904 | 42.6758568421347 |
| ABCD1 | 102.25509551881  | 64.5347406608537 | 67.895735332714  | 100.168016285684 |
|       | 79.5175547131776 | 80.3805507705979 | 92.8579489575841 | 113.444217634165 |
|       | 71.1894129030602 | 94.8742116922003 | 84.607833108004  | 62.8485724004124 |
| ABCD2 | 42.7150227340364 | 39.3667161654772 | 39.8656165405284 | 39.6292788039793 |
|       | 37.8343741244069 | 40.4359177791566 | 38.7337086062875 | 39.7509165247419 |
|       | 41.863927676552  | 37.920964499903  | 43.9802831041664 | 39.5748670524951 |
| ABCD3 | 78.8357122967692 | 87.1434190022564 | 83.8679756709676 | 62.3936376596431 |
|       | 90.6661301391451 | 67.9306669919176 | 108.263706890599 | 102.380096190518 |
|       | 101.954354107731 | 63.6197695952215 | 82.0206083292981 | 78.3467096982408 |
| ABCD4 | 45.8676005470521 | 45.2960223240174 | 42.02667925031   | 42.5321207892864 |
|       | 41.1575777497576 | 41.4219820984507 | 40.9607305725196 | 41.989786971805  |
|       | 41.4435352858263 | 44.619512785899  | 42.5864346233886 | 41.40680865944   |
| ABCE1 | 120.96329303892  | 257.050603883498 | 176.785214225094 | 144.427680369554 |
|       | 374.427492246826 | 187.422036538629 | 144.711001798454 | 183.887843429281 |
|       | 238.120731107691 | 136.140128421585 | 143.913007288353 | 191.298525555624 |
| ABCF1 | 572.19538884395  | 370.027120412227 | 373.802562320876 | 364.962649416567 |
|       | 546.80979198725  | 346.116601612353 | 416.40156274382  | 354.015808474189 |
|       | 373.330920144642 | 347.750020791938 | 458.47341225284  | 380.015934356432 |
| ABCF2 | 76.1417635449123 | 89.8808683919332 | 82.0149542477384 | 69.8314582428552 |
|       | 148.758736522703 | 92.2447473381285 | 84.8569316561572 | 69.1973371867031 |
|       | 104.754762973117 | 69.8941497035747 | 85.2598847559951 | 80.2289541115146 |
| ABCF3 | 80.0113001016496 | 66.7256057011273 | 95.7820879892969 | 67.1961800572759 |
|       | 124.22494803053  | 66.8632294055679 | 86.7968607218397 | 62.5528124447176 |
|       | 83.8679756709676 | 106.317388820963 | 80.4895102121889 | 72.5346469941833 |
| ABCG1 | 49.4878464533902 | 55.6904617926772 | 89.6115806694241 | 71.4473248804357 |
|       | 48.0901896064056 | 48.6957875504748 | 49.8281348927244 | 54.571866945312  |
|       | 51.7098181032862 | 61.2153068100932 | 55.3415844848806 | 59.1570467228834 |
| ABCG2 | 36.4564050256915 | 45.3486182278177 | 51.6159542017038 | 39.066284740632  |
|       | 45.1137938810047 | 44.6524308640784 | 36.8369172900902 | 34.8949555140527 |
|       | 38.5252456306656 | 44.7958122466628 | 53.4921736109774 | 47.6040671292013 |
| ABCG4 | 43.2724556187214 | 40.3384318592985 | 39.1799070031819 | 39.7411455670172 |
|       | 44.3557408297309 | 44.3648993568405 | 53.8687221233237 | 45.5581356216957 |
|       | 46.4164127487052 | 51.0055825931636 | 42.7275315121163 | 43.1805016690297 |
| ABCG5 | 47.0940613507321 | 50.3586212130973 | 43.9450023643394 | 50.8567345921473 |
|       | 66.5187917407182 | 43.6670755115848 | 48.6395795163502 | 48.7814131120945 |
|       | 51.9545473262296 | 55.6865353018811 | 47.0940613507321 | 52.2832912331043 |
| ABCG8 | 41.3387790895716 | 46.8954576545929 | 45.4865173433646 | 45.5869891570251 |
|       | 39.1650142708257 | 38.5252456306656 | 43.9450023643394 | 45.7476095696859 |
|       | 38.3418933808844 | 45.9004543328976 | 40.9157352260901 | 44.6484005362281 |
| ABHD1 | 41.4508241771315 | 34.5023764006976 | 35.8265993915844 | 40.1804147506786 |
|       | 48.0234896130991 | 39.7394181011603 | 37.0564573649223 | 54.1731035633439 |
|       | 42.5406888281114 | 42.785429206422  | 43.0016969050339 | 40.2669497398702 |

ABHD10 108.022329297132 89.3342384381684 74.3523005665671  
 94.5501397951415 122.824055084598 111.096799408676 99.9896394343368  
 90.500550952567 79.2824265044758 131.973056760893 102.706563820232  
 103.458867136383  
 ABHD11 81.6233038764401 76.6094442444074 74.5654028199926  
 47.9915414951747 89.8957070711076 64.9498081060676 78.7320333941149  
 60.747393219527 105.914573205761 47.2299678280724 53.5453975444568  
 53.0216110762751  
 ABHD12 259.481036467571 400.633619994399 155.392743674792  
 187.002948435359 177.111143479957 110.487281983469 451.820169649522  
 247.074756460224 199.776860110557 294.7772562683 221.325534445978  
 178.4681248137  
 ABHD12B 46.263826584899 41.9894412416874 40.4412246793572  
 42.5054997771887 41.6285300488826 41.5146360101556 43.607701594929  
 41.2040352443154 40.6957787921451 41.3752447964111 40.0440633413412  
 40.3330033416496  
 ABHD13 38.6213341190836 41.1212129940704 43.0602678767669  
 41.0219290963778 43.3896803974186 40.8091178323174 43.6025443656008  
 39.4710743516517 44.7752571196612 40.2615278292875 39.4410515050885  
 43.1805016690297  
 ABHD14A 58.651329686676 179.605537867711 160.883501367581  
 103.530430972911 319.092568066532 202.708232693973 128.391264770998  
 106.292775688671 225.589127792587 167.319747725488 181.545493080363  
 112.944044862693  
 ABHD14B 84.2728210732532 113.929486370331 105.814959179397  
 95.1423940686828 94.952392592003 109.943883439481 122.118080859526  
 122.143519601825 165.093395508014 219.186221756668 186.195424728755  
 126.115065200084  
 ABHD2 53.9612654850046 50.0425298550559 53.4413436510999 65.2107270580361  
 49.5210706664792 50.0352509660599 45.7452456977857 60.1444334141838  
 50.6750785584772 48.9826868640753 48.2050207071554 50.9339938653926  
 ABHD3 77.9057333780847 111.522812019895 116.949813289388 142.048367760597  
 86.8871118411414 72.5482509922085 78.3082773071531 64.8336014343435  
 149.231260844854 55.9283039581662 68.9745034946434 99.3956523785983  
 ABHD4 168.036319777283 53.812632592983 53.3127618245672 83.014860007187  
 46.3150221024046 84.1922656126304 88.0664425843955 89.5130163419167  
 78.6048653630165 102.294142438313 93.2484615907966 107.799236230743  
 ABHD5 80.5437011468815 164.735191308776 122.748811531184 332.659496278775  
 159.540626405 93.2630594602634 114.526825145076 150.649377863375  
 111.291087721139 71.7464249053513 77.2834482217973 101.699631771662  
 ABHD6 50.6473771879221 63.8399092891728 68.4720753153522 93.7782490229256  
 71.1607965028029 73.1169003714219 74.1353964055485 66.211494935811  
 89.7862835647016 75.0665411373616 84.2960453806012 73.408861359425  
 ABHD7 43.4626049853157 43.5182502375207 42.3536549114165 42.1273928203021  
 39.7568367479301 46.8954576545929 37.2892641289258 47.2864663693787  
 41.3803269429468 41.8613406887824 40.3452320167286 37.9607839934735  
 ABHD8 147.187118389181 107.094663242259 114.611557317665 164.917385239962  
 195.512986297442 170.223657280542 168.91210897306 204.862161704394  
 132.57180783668 169.96123729479 186.477689350702 142.251426773121  
 ABHD9 86.8262463672891 71.4197504261453 102.607924735378 39.3750969348308  
 229.881790983135 69.0530953932111 101.716697533604 48.1591264215184  
 43.8482802038826 56.057906531592 54.7883681830995 52.6922486991742

ABI1 63.6222532132037 67.4984616497574 74.2769881586739 75.9099205260748  
58.8188963227059 65.3096524773304 58.8361533901971 62.0553450433433  
71.4864243594056 55.9283039581662 70.1597323687098 80.1809075683154  
ABI2 62.3042205863409 58.7992572743257 74.3523005665671 51.5913529948887  
78.258486366912 64.5187138759372 65.5800543140431 77.720889005668  
64.4837166864084 58.5831897269778 58.3912728421768 67.3779879510397  
ABI3 55.1306642449627 63.2804984998739 55.6865353018811 90.5216273844682  
49.9493230064613 49.9699131196797 41.8315602975157 49.2019743609873  
48.5792058061372 57.4665857273093 57.5430365699386 42.1537476443423  
ABI3BP 62.7669079605627 66.7256057011273 49.8344973836834  
155.564141715819 35.6434124419782 347.196922795214 37.0564573649223  
136.650986373497 42.5406888281114 177.047048502104 99.3744103955071  
188.513581321162  
ABL1 188.943404504867 134.537040608687 81.7967230859562 116.434267173815  
128.844013736935 294.090159716249 140.866324039667 138.618449365819  
111.438294720953 143.822560762049 168.17913316957 166.036790614812  
ABL2 70.4732736918246 49.2050538150106 52.1132472786412 92.526038865874  
50.1213497293778 61.8757975011721 45.5683029249676 63.8694991450134  
47.0027453663546 46.3838120599769 50.3745056312199 51.5437850416773  
ABLIM1 93.8968899420039 402.978328664331 398.43592055172  
134.17280153232 179.158053533144 536.290060852815 302.20349084931  
175.652989203497 286.927016665685 551.304967553891 559.296669575666  
493.705301673753  
ABLIM2 47.2862299990938 47.087835967892 45.7968648044613  
51.949834638817 49.1928206164702 53.6858208094027 44.4639405506967  
57.2350830635912 37.6383530120621 51.5855515705917 76.8713035584472  
53.5643281930979  
ABLIM3 51.6558970571712 54.0461131287999 94.3953345963359  
74.2429851177794 54.0126916508417 98.2843999216669 60.2399886747451  
65.4714272652857 70.9462008788871 131.471030729546 97.2615918872914  
101.156215957297  
ABO 42.7150227340364 43.0227387991135 46.5650556481721 38.4208429103799  
39.7568367479301 37.3799542961839 39.5496902678788 35.3608605269276  
39.1790517315259 43.1839109702714 42.911855821602 44.8372404608604  
ABP1 44.7044140979108 44.9370339275041 45.2313723727673 58.3475983630509  
46.3150221024046 42.9695585740813 44.0687697278114 44.293922970134  
46.4861258030402 42.1622837416589 36.7283081422707 39.6352613956998  
ABR 129.605603092944 181.705809767061 203.53267380432 179.214713709599  
139.472956453414 113.179313022693 101.16781803884 110.379403044901  
99.7361599442168 197.52820443061 176.963666283432 171.360248172138  
ABRA 41.3387790895716 44.6918600441328 43.0016969050339 46.614092935749  
44.3557408297309 42.357910063876 50.3519150282938 34.1806289878747  
41.074824727477 45.0155543555707 42.5426057453993 40.1700117452801  
ABT1 59.8248482438562 54.0052948715814 55.4502804236424 47.3574589211166  
75.4652763126449 56.1671440556142 108.147548794301 51.6660481331154  
46.4164127487052 49.7259371799014 52.104880481326 46.2625470410195  
ABTB1 77.6056319020116 127.741016067967 91.7844162703214 216.063990451376  
64.5531442955004 133.074560812703 107.951009163316 80.7067505750848  
71.3197554517106 125.661351053514 129.810477623628 97.3929166450379  
ABTB2 50.1533437545239 37.4540772310118 46.2625470410195 46.0228732507872  
44.8897737954573 47.7556758818053 43.1931731665131 56.1404433602127  
47.5564423692142 50.8826620053386 52.5930185400362 58.112348043634

|        |                  |                  |                  |                  |
|--------|------------------|------------------|------------------|------------------|
| ACAA1  | 150.031554835542 | 494.162646055732 | 581.706970365754 | 226.057278804077 |
|        | 1127.96214301065 | 297.701126167694 | 365.517719684028 | 231.685652845234 |
|        | 376.289659542649 | 339.767107648884 | 329.120125961774 | 403.92758879201  |
| ACAA2  | 86.8262463672891 | 127.043177339038 | 61.5824518349507 | 116.122324921267 |
|        | 46.5557478175976 | 124.751020763508 | 212.664574366477 | 148.595294991115 |
|        | 70.0801020070064 | 89.9284109077375 | 92.2772139468085 | 90.8140983242733 |
| ACACA  | 241.31366702947  | 180.844663304872 | 162.447872391923 | 86.8596934326046 |
|        | 295.69493803986  | 205.449627031002 | 320.13475752314  | 249.776078532596 |
|        | 357.182869779274 | 234.615033303459 | 223.040734249612 | 255.365088438518 |
| ACACB  | 83.2737524877952 | 79.271901834289  | 99.4546022538476 | 81.1189042503645 |
|        | 83.2652824564032 | 452.883337614277 | 75.4053820110486 | 104.950400251642 |
|        | 72.8653205184014 | 370.779448406233 | 348.206465194205 | 151.641746442323 |
| ACAD10 | 69.0975200641705 | 94.1289383735162 | 82.5344501505114 |                  |
|        | 65.084620579901  | 128.38299874379  | 70.2553917409773 | 108.007227281411 |
|        | 59.220967994972  | 128.70380102034  | 100.413031488199 | 112.644426507762 |
|        | 74.4365426051588 |                  |                  |                  |
| ACAD11 | 205.086228002776 | 151.936097714553 | 226.926786963011 |                  |
|        | 152.545682001987 | 187.580695643466 | 177.688415930665 | 77.4046818339539 |
|        | 152.76005226611  | 102.706563820232 | 209.214729757636 | 176.557322629245 |
|        | 206.146732318529 |                  |                  |                  |
| ACAD8  | 114.888828460086 | 86.0630164348952 | 132.036058401203 | 88.6717761948382 |
|        | 121.552188287725 | 81.9983163893373 | 75.5034623354897 | 97.8764110456132 |
|        | 86.4975836583091 | 91.9185612536409 | 85.4635831413678 | 100.386011517899 |
| ACAD9  | 211.926421068313 | 295.473526251997 | 259.456935785521 | 183.613579501306 |
|        | 377.221676837377 | 202.01900875263  | 358.63899765183  | 263.44529683749  |
|        | 232.591262307238 | 211.253227661874 | 236.536058101486 | 172.95999061341  |
| ACADL  | 42.9104454767916 | 41.2598458726002 | 37.6557714476853 | 42.4580504587581 |
|        | 39.7568367479301 | 46.263826584899  | 44.3440839686558 | 42.5435283762933 |
|        | 54.0192060888782 | 43.4885245598939 | 42.0750889188255 | 42.1537476443423 |
| ACADM  | 193.853749625939 | 307.550936236018 | 302.667538432677 | 258.375785708747 |
|        | 195.018775118528 | 351.439404852971 | 343.990395610093 | 250.41086379231  |
|        | 153.059039745191 | 299.74710723735  | 311.901423694475 | 400.093769705765 |
| ACADS  | 81.8104679118753 | 86.7710020879725 | 95.7820879892969 | 76.0975301977715 |
|        | 83.764882413379  | 105.197692490363 | 100.289042948128 | 82.9322141700549 |
|        | 125.383837024985 | 114.796237914478 | 121.936597605894 | 92.8006484232438 |
| ACADSB | 38.2083710281545 | 66.8693882433359 | 55.4502804236424 |                  |
|        | 46.8954576545929 | 46.3150221024046 | 47.8636003588181 | 44.4639405506967 |
|        | 46.4672637826582 | 43.8482802038826 | 56.8201201798712 | 52.5930185400362 |
|        | 49.4786466722535 |                  |                  |                  |
| ACADVL | 861.427193617946 | 1149.90692951795 | 1676.22158135012 |                  |
|        | 550.861615347663 | 808.857027942253 | 638.305455110267 | 900.517711546397 |
|        | 720.552354470517 | 687.011162822211 | 1357.41745370754 | 1704.0522304387  |
|        | 1169.14891282789 |                  |                  |                  |
| ACAN   | 37.8386378737561 | 41.554942319225  | 41.9666541498638 | 40.9607305725196 |
|        | 36.6354013629791 | 33.2552842693684 | 40.1235656101329 | 40.6171774724171 |
|        | 40.9901805728485 | 40.1179210534118 | 36.8282383070068 | 38.4330755397458 |
| ACAP1  | 78.0020909283414 | 98.9988668602468 | 120.289145237975 | 305.619340338331 |
|        | 43.1252272136667 | 60.2083550387718 | 65.1041577962151 | 75.3462586192013 |
|        | 52.7512110769042 | 64.3383155834968 | 94.5111909776371 | 49.9692385479389 |
| ACAP3  | 50.379587451669  | 77.0927030014721 | 63.2475738480323 | 41.1886975241176 |
|        | 64.4999048115671 | 49.8472708021525 | 51.4349390827895 | 59.9968592852122 |
|        | 54.2825877218965 | 50.5252048155459 | 48.8744644207821 | 47.6938628797168 |



|       |                  |                  |                  |                  |
|-------|------------------|------------------|------------------|------------------|
| ACAT1 | 224.202855268674 | 212.187855950414 | 144.609635554528 | 301.198565023795 |
|       | 277.284338888467 | 966.803172864162 | 264.600870859012 | 423.608694638779 |
|       | 232.911951245618 | 339.767107648884 | 266.250887288858 | 363.324816966828 |
| ACAT2 | 109.795084617739 | 133.040933717958 | 186.655552987116 | 156.476627024647 |
|       | 131.57403028894  | 94.952392592003  | 190.647389246848 | 106.140215438654 |
|       | 207.957319374194 | 70.2888664894537 | 78.59966540743   | 106.99628036922  |
| ACBD3 | 344.061882582662 | 280.622184239624 | 313.233036704221 | 311.985010273921 |
|       | 281.602712448925 | 206.072527867605 | 280.563427715895 | 293.755623192857 |
|       | 252.583117397109 | 268.072653271299 | 188.042978085327 | 270.78959225422  |
| ACBD4 | 40.6559419616644 | 46.0023068797812 | 41.528370959196  | 41.3027031037343 |
|       | 42.1650127805175 | 44.1737502492846 | 36.9355798143571 | 43.844855336215  |
|       | 36.4476883897928 | 50.7855742231932 | 45.390192977585  | 41.2437378488025 |
| ACBD5 | 40.1145011765998 | 43.9852350008246 | 39.8299340037009 | 44.1144663373989 |
|       | 45.1137938810047 | 43.7218212419823 | 40.2154497375715 | 38.745552403895  |
|       | 41.9635525160083 | 36.9102644736882 | 39.0156305603334 | 42.3214282169749 |
| ACBD6 | 131.483899499125 | 132.098298410135 | 156.770274308736 | 112.957927208627 |
|       | 176.670909065664 | 170.560304063093 | 170.501116810593 | 162.833785414988 |
|       | 176.816741656659 | 147.945429978177 | 131.216899549608 | 129.938114164087 |
| ACBD7 | 40.2543341073001 | 38.1811246394237 | 41.785676764591  | 38.9074189954657 |
|       | 40.6723334103791 | 40.9506062495231 | 74.7534423194688 | 63.9110569727542 |
|       | 61.7559532093027 | 47.9056710878325 | 44.3763859390287 | 44.2527566343661 |
| ACCN1 | 43.4100411978366 | 43.896638326678  | 40.5386195997545 | 41.5464765641928 |
|       | 38.7004513165111 | 38.5707420487455 | 39.3585350448719 | 44.6560353921013 |
|       | 40.9460396298042 | 41.9097689475185 | 40.6373400186325 | 43.8575940017119 |
| ACCN2 | 44.2350046179299 | 43.826317180678  | 42.4890076400051 | 44.7401523707775 |
|       | 70.1238785863433 | 51.9421032049606 | 44.1407835440612 | 43.0390857698452 |
|       | 49.2879849674517 | 49.461728580617  | 48.6494451061637 | 43.5420658412177 |
| ACCN3 | 47.1216490839161 | 51.1740855632044 | 42.9104454767916 | 47.0874209746031 |
|       | 55.3100442506299 | 52.0299937917925 | 46.4388841354122 | 50.9099078696349 |
|       | 54.1745577382276 | 51.0055825931636 | 49.2879849674517 | 54.6659845741133 |
| ACCN4 | 42.2651653674882 | 43.0829701603126 | 40.8860076320216 | 39.853175885492  |
|       | 38.0184648502986 | 36.8059561571675 | 41.8887298788489 | 42.157627240486  |
|       | 43.4125951053517 | 36.9795961564828 | 39.9519547348106 | 38.3757040629343 |
| ACCN5 | 39.8662795144616 | 38.1312950900467 | 40.4070046183108 | 39.2780515621926 |
|       | 36.6354013629791 | 32.771863438151  | 35.1307934330047 | 38.4540849632254 |
|       | 40.4997186069494 | 37.2089297656361 | 34.7308008643142 | 42.7782216342806 |
| ACD   | 122.849949163123 | 119.512426152446 | 145.607100979838 | 124.803597244786 |
|       | 99.4458090623294 | 136.711122812062 | 151.135296427249 | 141.48637125542  |
|       | 115.328304312071 | 135.824520574227 | 127.49459343016  | 107.693162310852 |
| ACE   | 40.0124413244394 | 39.3681232503406 | 38.6005272730664 | 45.4634652319753 |
|       | 40.148780650831  | 41.628211174823  | 40.9157352260901 | 38.9229928131225 |
|       | 38.9444001301141 | 39.9948390976317 | 39.2542963855807 | 39.8497227447888 |
| ACE2  | 66.6547247910487 | 48.3077814647455 | 50.0748292497578 | 38.9534635879195 |
|       | 41.3755760434934 | 42.5660695551615 | 49.2546642180676 | 43.2551508830106 |
|       | 58.6431245059655 | 51.4454142248566 | 49.3901004211918 | 49.904979214379  |
| ACHE  | 42.668311948721  | 45.1694246393676 | 42.2577689927563 | 43.3554905202712 |
|       | 39.5317722761104 | 44.6085311049673 | 42.0016830644258 | 45.3872406432794 |
|       | 42.1594905198929 | 39.6333888530279 | 44.4408504417009 | 42.4322338033273 |
| ACIN1 | 444.858305070415 | 312.923326422701 | 264.161390133378 | 270.394857925086 |
|       | 268.683528469759 | 220.79051545138  | 279.841798764418 | 308.393270347486 |
|       | 324.994911416877 | 435.478616005848 | 444.471597593258 | 285.56460901579  |
| ACLY  | 700.477686061791 | 584.724083441601 | 548.601467852543 | 370.495645380436 |
|       | 841.316771679857 | 324.126628444078 | 593.345148568451 | 595.012422454829 |
|       | 719.815240381415 | 319.871452890512 | 385.827237353675 | 456.467726693355 |

|        |                  |                  |                  |                  |
|--------|------------------|------------------|------------------|------------------|
| ACMSD  | 61.7551416187554 | 54.7083331985678 | 69.4047473173218 | 57.8277957325085 |
|        | 65.3019328668633 | 58.4435847520801 | 53.3111230705754 | 59.220967994972  |
|        | 70.4262478188233 | 72.6549171886783 | 64.9959712888709 | 64.4156641487994 |
| ACN9   | 77.441946514938  | 129.925137664962 | 103.233768723364 | 114.979124960177 |
|        | 243.843941346211 | 120.789309915619 | 123.674164545425 | 112.506613718654 |
|        | 208.915145509698 | 83.946822476147  | 85.6989061660348 | 128.717988447086 |
| ACO1   | 790.094848284547 | 480.386431986343 | 352.246108891022 | 595.012422454829 |
|        | 408.991719312986 | 775.931494648677 | 661.718946652592 | 625.435083064752 |
|        | 509.879213331349 | 577.276184555955 | 823.933615182634 | 690.568858101531 |
| ACO2   | 123.138085708441 | 185.72957253374  | 146.42128243217  | 156.476627024647 |
|        | 158.853244260329 | 169.18132209076  | 159.835690229505 | 157.543887960599 |
|        | 194.644164648125 | 125.512567429299 | 166.349012388957 | 164.780216383719 |
| ACOT1  | 74.3135387703106 | 51.2776048338    | 54.0536858212253 | 59.3618843678775 |
|        | 46.572043843509  | 76.889690218685  | 51.8667932650345 | 40.831207953647  |
|        | 93.3718038663074 | 47.9056710878325 | 60.2509851471485 | 60.5548506034677 |
| ACOT11 | 164.097531361519 | 183.286063142727 | 217.39432336811  |                  |
|        | 64.8154690917175 | 82.2348885628237 | 53.63657997649   | 173.08677862231  |
|        | 141.423857667761 | 151.641746442323 | 230.975122271137 | 244.678323059428 |
|        | 186.161177110898 |                  |                  |                  |
| ACOT12 | 40.6559419616644 | 40.716553247236  | 38.6727842796202 |                  |
|        | 40.4359177791566 | 43.3332476888305 | 42.2577689927563 | 37.0564573649223 |
|        | 43.1567024035183 | 44.0519245668737 | 51.4454142248566 | 50.0303076717704 |
|        | 41.2437378488025 |                  |                  |                  |
| ACOT2  | 109.137372445043 | 71.0645521832919 | 88.9928368134295 | 54.2886483704949 |
|        | 67.0163226819964 | 112.039388952208 | 66.6118713143653 | 45.1151758109609 |
|        | 84.6158251687884 | 52.6879797806876 | 56.8436081694537 | 78.1623301184313 |
| ACOT4  | 252.170412162149 | 43.9421822132391 | 53.2046867327331 | 103.961956810572 |
|        | 117.260454792593 | 59.0686629877982 | 139.177720567217 | 60.419911425109  |
|        | 157.334378544568 | 55.6069214673486 | 57.7786197537899 | 66.6118713143653 |
| ACOT6  | 45.7356815244513 | 47.087835967892  | 39.4710743516517 | 40.9607305725196 |
|        | 36.6354013629791 | 38.5252456306656 | 39.3585350448719 | 38.6454098044474 |
|        | 38.0213051227859 | 44.4652605017595 | 32.9879066304034 | 38.3291713594599 |
| ACOT7  | 132.3192754634   | 102.706563820232 | 85.4960014582244 | 113.026772174726 |
|        | 106.049736669661 | 89.6115806694241 | 159.485978728    | 226.804294585045 |
|        | 80.3142559621726 | 99.7361599442168 | 92.7254735358203 | 96.9051967257119 |
| ACOT8  | 45.8108990837624 | 64.8903340853337 | 70.7238101239421 | 63.4531374125233 |
|        | 54.4586176399381 | 52.2089306840125 | 77.9028721785469 | 57.9713749600418 |
|        | 75.4572860692649 | 47.8207974930031 | 62.105802634526  | 60.5948704279864 |
| ACOT9  | 93.2557602398938 | 70.5534237141767 | 77.2048580540589 | 157.095926797414 |
|        | 76.8393340617473 | 122.099297248392 | 97.4515987591398 | 87.275548276476  |
|        | 72.0334593545916 | 62.4530276414691 | 63.8294437579951 | 96.3232257371077 |
| ACOX1  | 53.8184424596644 | 73.1640951333742 | 76.4116336410131 | 52.8502823653368 |
|        | 64.0752803796842 | 53.3185097662527 | 67.0455170947389 | 99.5192591352063 |
|        | 72.6888636455541 | 62.7669079605627 | 70.2565873027242 | 75.4317740345967 |
| ACOX2  | 70.3757673501097 | 48.9899488302637 | 46.2625470410195 | 80.5537984388921 |
|        | 50.8875036861067 | 300.121875447445 | 36.5352572191451 | 54.0507720792049 |
|        | 41.4636047919453 | 158.853244260329 | 135.012695962236 | 116.475941571644 |
| ACOX3  | 124.22494803053  | 225.794026573235 | 269.284584971871 | 150.082905944963 |
|        | 177.620987812591 | 147.557451530784 | 344.133384411423 | 190.61997068475  |
|        | 198.497745548245 | 188.533240079423 | 238.893145911331 | 156.311985997533 |
| ACOXL  | 44.2350046179299 | 49.4982025424177 | 41.785676764591  | 41.1886975241176 |
|        | 45.4751076037511 | 36.0306975524309 | 50.5252048155459 | 59.8760452220989 |
|        | 45.4799270968969 | 59.5785089386245 | 48.7502645382856 | 66.0786923699684 |

|        |                  |                  |                  |                  |
|--------|------------------|------------------|------------------|------------------|
| ACP1   | 712.80113322987  | 494.733185937057 | 422.237766234202 | 351.365159217524 |
|        | 793.570993808328 | 443.863346367342 | 304.41727337972  | 380.541502795438 |
|        | 458.47341225284  | 148.71330612986  | 197.617554897454 | 376.289659542649 |
| ACP2   | 118.614027673431 | 91.9238405195899 | 123.729687262037 | 172.102568448455 |
|        | 83.9387217886961 | 104.587564056763 | 91.0154871536701 | 104.232196493024 |
|        | 134.152059562322 | 106.219480656782 | 144.928534157065 | 116.434267173815 |
| ACP5   | 141.649461526745 | 115.519896726673 | 79.7733480606334 | 794.806085783439 |
|        | 97.1271615802556 | 85.0275638433103 | 110.589130460258 | 139.177720567217 |
|        | 59.2566572428546 | 63.7002949745101 | 62.0404348860702 | 64.4156641487994 |
| ACP6   | 71.1521292570086 | 132.946528291039 | 239.385229462309 | 80.5537984388921 |
|        | 174.64729344609  | 80.7067505750848 | 214.873872837015 | 643.218735985767 |
|        | 298.200087139598 | 173.5606219477   | 158.590601962928 | 123.536432289877 |
| ACPL2  | 132.684895918889 | 97.4709987978999 | 131.632115558243 | 74.4365426051588 |
|        | 204.774090707986 | 113.287380238064 | 125.997088252817 | 153.812414753676 |
|        | 219.771890732457 | 86.4114854104675 | 99.0647786948132 | 182.885934774318 |
| ACPP   | 49.2595762436995 | 52.502055890816  | 43.7630587657205 | 40.4359177791566 |
|        | 40.9950639693255 | 41.9543948167375 | 51.0013344286851 | 39.6474008369935 |
|        | 50.2223403889892 | 45.4614234442527 | 46.4753015651202 | 41.863927676552  |
| ACPT   | 62.928986708012  | 54.437526296816  | 53.7792717770978 | 68.4261608261522 |
|        | 60.2276476399612 | 60.877229406755  | 61.1022920882065 | 60.5571721986885 |
|        | 55.4030910454028 | 59.0630473216622 | 55.7868713984479 | 54.400905818898  |
| ACR    | 43.4626049853157 | 42.6939394537076 | 37.8386378737561 | 40.5484717678957 |
|        | 40.6723334103791 | 48.4758590019384 | 40.1235656101329 | 42.4580504587581 |
|        | 46.581796165231  | 39.3698811593364 | 42.0750889188255 | 37.5556299264699 |
| ACRBP  | 42.1537476443423 | 48.4980626712175 | 40.4070046183108 | 61.3747706295648 |
|        | 44.7829632472754 | 44.6524308640784 | 60.5125774827425 | 44.1311654985682 |
|        | 41.4636047919453 | 49.0841460667818 | 45.9104478407175 | 46.7182294568603 |
| ACRC   | 57.0006212637829 | 46.0023068797812 | 49.3780606970538 | 55.2214187655851 |
|        | 48.6224651100733 | 50.2163892855092 | 40.4359177791566 | 45.1714698794331 |
|        | 51.1055541075029 | 53.3059058105836 | 46.0905079010237 | 46.917149434588  |
| ACRV1  | 46.0398513158469 | 42.9020321355927 | 43.0971787292711 | 40.4967168818294 |
|        | 65.7471714715797 | 44.6024422254257 | 42.4939802311136 | 59.3923286524971 |
|        | 47.27543600687   | 49.0841460667818 | 40.7725311293918 | 41.7575097298927 |
| ACSBG1 | 41.0608773166058 | 51.6869155634183 | 71.3527183280827 |                  |
|        | 37.8442841690502 | 44.147557390293  | 49.4157684139858 | 41.0381860307445 |
|        | 39.7509165247419 | 51.0062122023297 | 66.274247400793  | 50.7159667633757 |
|        | 42.8864415494484 |                  |                  |                  |
| ACSBG2 | 39.266565827316  | 41.4508241771315 | 36.0306975524309 |                  |
|        | 35.8472302065546 | 40.8873907150245 | 38.3418933808844 | 42.357910063876  |
|        | 42.7431359850339 | 43.3744503319109 | 43.6033221838149 | 44.553780984244  |
|        | 39.6352613956998 |                  |                  |                  |
| ACSF3  | 40.7609952437622 | 39.6123051184545 | 46.8267540220952 | 43.5627649099623 |
|        | 41.7929491793697 | 40.8634043028528 | 44.9863726205428 | 42.5435283762933 |
|        | 45.1899271235974 | 45.0155543555707 | 45.8180710486329 | 44.2527566343661 |
| ACSL1  | 90.8236750745974 | 131.67159377585  | 75.9174504780598 | 434.841521967958 |
|        | 111.501058276821 | 105.814959179397 | 176.839214683647 | 114.719721626067 |
|        | 189.650905999631 | 82.8275497073451 | 76.7063975550116 | 80.8366627364071 |
| ACSL3  | 146.543232229227 | 240.6614822416   | 229.130963999337 | 214.586915093492 |
|        | 368.390023942835 | 154.132233967972 | 148.887819162926 | 156.95090716929  |
|        | 392.409679550956 | 127.708268637068 | 166.951916348418 | 300.762511215441 |
| ACSL4  | 73.4122412764173 | 85.7390214986603 | 75.4317740345967 | 169.889618506937 |
|        | 83.877343750194  | 103.080153415433 | 151.99110418225  | 131.67159377585  |
|        | 93.8042295944812 | 74.9236800269025 | 71.4414688202373 | 94.7718338968252 |

|        |                  |                  |                  |                  |
|--------|------------------|------------------|------------------|------------------|
| ACSL5  | 94.3674661847143 | 251.4927207704   | 218.917221711155 | 138.401109242778 |
|        | 171.427692959758 | 72.0674952635945 | 307.445116836976 | 112.375316615894 |
|        | 239.316215255944 | 462.362735276132 | 402.08877403329  | 543.268021785502 |
| ACSL6  | 42.3620028137457 | 41.3277288245157 | 39.9101908547397 | 40.5061122751948 |
|        | 41.1486675205552 | 39.9718514851461 | 39.6158343667921 | 41.989786971805  |
|        | 40.741722894262  | 38.5782171290591 | 41.9908237694988 | 38.5279745308203 |
| ACSM1  | 45.2875173643252 | 38.4330755397458 | 35.3649449469275 | 36.9912468186322 |
|        | 43.5544347011646 | 45.0882356578404 | 42.8684958525042 | 38.4540849632254 |
|        | 41.863927676552  | 41.5435611403119 | 41.9908237694988 | 38.9496515344837 |
| ACSM2A | 31.8228237796461 | 37.6383530120621 | 37.5597671487621 |                  |
|        | 44.1483976313959 | 40.148780650831  | 38.6414316877471 | 41.5817737564592 |
|        | 37.7612949798895 | 40.2274522635576 | 40.5090849993014 | 38.745552403895  |
|        | 38.745552403895  |                  |                  |                  |
| ACSM2B | 40.0124413244394 | 42.5269793679335 | 44.1976966800856 |                  |
|        | 40.1321264723693 | 40.4261913313642 | 40.9506062495231 | 41.8315602975157 |
|        | 39.2672712041774 | 42.2577689927563 | 38.4187686307607 | 37.9540590751706 |
|        | 41.0657892043496 |                  |                  |                  |
| ACSM3  | 56.5319193881205 | 55.3932018462158 | 53.6334631215581 | 41.9635525160083 |
|        | 55.3100442506299 | 56.9320717885002 | 83.9647518349407 | 287.247399926139 |
|        | 71.9771425105735 | 71.2409890549638 | 71.3868929454853 | 69.5544840164738 |
| ACSM4  | 43.0930293831497 | 36.89524015739   | 39.5450079747895 | 36.1562979552173 |
|        | 38.9496515344837 | 39.6251842352088 | 39.4600924554505 | 41.9315419791594 |
|        | 35.0305278582179 | 41.5435611403119 | 38.745552403895  | 41.4508241771315 |
| ACSM5  | 41.1523487516364 | 43.1560065801875 | 42.157627240486  | 44.8813851439455 |
|        | 42.046575509735  | 48.8744644207821 | 44.4074592653814 | 42.0494116081998 |
|        | 44.0519245668737 | 44.3046896365956 | 45.452834313916  | 42.3047762223294 |
| ACSS1  | 68.6627996695828 | 148.458171821142 | 62.3936376596431 | 98.9560329133205 |
|        | 67.9032387662129 | 65.6914955077809 | 157.843337785472 | 104.089998273812 |
|        | 105.247736284747 | 106.527144354592 | 127.345094323724 | 90.9361642101537 |
| ACSS2  | 167.16650846037  | 152.132756414024 | 181.2179249806   | 252.649651285136 |
|        | 182.976132230487 | 177.133999361532 | 166.168385855406 | 203.373397813051 |
|        | 320.13475752314  | 254.639522735592 | 210.958578914607 | 180.562005428669 |
| ACSS3  | 38.8561375693335 | 38.8336427948187 | 36.8730514568925 | 34.7266486944713 |
|        | 34.1686574241133 | 41.0582900711341 | 40.9157352260901 | 43.7396619462033 |
|        | 44.4395580493118 | 41.3321861371202 | 33.2774014136617 | 41.863927676552  |
| ACTA1  | 81.8104679118753 | 44.0409178714232 | 43.5710871617107 | 42.6913548400127 |
|        | 54.1225249245036 | 44.2607789091176 | 45.4799270968969 | 43.9366081640576 |
|        | 41.5635499110307 | 46.325232414659  | 46.4753015651202 | 57.5372732453319 |
| ACTA2  | 10996.2779403491 | 4482.5285743878  | 3999.32180022337 | 2816.7754199004  |
|        | 3966.51586153125 | 16661.6081002448 | 215.800662077432 | 2640.06306087033 |
|        | 461.123856163975 | 14226.3743910711 | 13230.9863405074 | 14226.3743910711 |
| ACTB   | 10351.5373412096 | 7980.71309230447 | 8349.59691588869 | 8827.37298329149 |
|        | 6258.22561934986 | 8630.67463560037 | 5776.17749026501 | 6258.22561934986 |
|        | 7627.46814033012 | 5479.94045861143 | 6555.04068292972 | 7476.94487791412 |
| ACTC1  | 56.2508140932179 | 42.466333667839  | 53.3791548006794 | 42.8848887336829 |
|        | 44.0451487108213 | 1900.96666834569 | 44.2166118829877 | 47.5439485437351 |
|        | 39.853866204927  | 1310.03307063841 | 918.083610591772 | 1190.10462185567 |
| ACTG1  | 8545.48005557056 | 13656.2581082905 | 9488.06491634484 | 6819.74871209328 |
|        | 10996.2779403491 | 6186.45345364665 | 9060.10165509099 | 8703.02873382565 |
|        | 10235.3288951482 | 5438.34345794521 | 5733.54417656207 | 5177.04105968809 |
| ACTG2  | 3653.59181300011 | 1247.50618540769 | 981.039763059681 | 702.737741114234 |
|        | 1806.22468459769 | 15358.8899487375 | 60.9648845690177 | 1891.37245670852 |
|        | 90.4957279507369 | 15358.8899487375 | 12456.731302703  | 16661.6081002448 |

ACTL6A 311.901423694475 383.853296408061 280.402165030951  
 177.82359682336 491.8684831079 249.246628143531 442.380936516984  
 284.795064481553 451.820169649522 151.601402122351 179.779145453083  
 289.975375372371  
 ACTL6B 39.0620487644635 39.0894172982439 44.3344900481112  
 41.3027031037343 40.8873907150245 45.0882356578404 40.5585676679482  
 42.5435283762933 41.6616444147804 48.6124127998952 36.0481934423077  
 44.9070250604284  
 ACTL7A 41.1523487516364 45.6533175604486 41.8751578329365  
 37.4223289687135 37.4470183315826 35.0970060242246 45.3597029614942  
 44.2159020605784 43.7630587657205 37.0320432433314 38.8507804383261  
 41.9430737035925  
 ACTL7B 48.6621527194963 49.2050538150106 51.3268475761593  
 47.6687908290818 48.1473938886239 46.1513019317765 42.8684958525042  
 45.7476095696859 45.2897806651929 51.3351387089044 51.2318935933116  
 47.5025821041537  
 ACTL8 37.2474303302343 44.7829632472754 42.5406888281114 33.9645433044281  
 71.7263663921367 49.7458652239071 43.9450023643394 40.7311497914871  
 34.8552366193358 41.1222709786153 39.4410515050885 42.2577689927563  
 ACTN1 1159.77262479002 458.66739585187 918.083610591772 1985.3999418878  
 957.682898193927 2138.23653387331 612.441960343995 413.067407579649  
 670.023570141464 933.968759959712 1418.94307844471 1342.10592868516  
 ACTN2 55.2182004838121 51.4413099192899 46.6588655218735 44.265834798964  
 61.3077641493507 50.0748292497578 45.6042625176633 57.445796273665  
 46.581796165231 63.3872214856708 55.4694986901287 65.2771529943605  
 ACTN3 35.5179217192467 38.7344853699576 34.4716904283753 37.7469621225553  
 34.3633615460307 37.3799542961839 42.629412460409 38.956280281655  
 36.0741672064298 40.3235655331796 41.0808257270221 38.3291713594599  
 ACTN4 2365.73772015255 644.368005872231 669.776067547468 441.090368426661  
 624.097858948785 636.701499995107 1266.41536472956 939.453799186397  
 796.359355922952 858.975085087497 1120.83891847181 762.855719373733  
 ACTR10 231.333080775773 245.489660195494 265.570814613305  
 226.057278804077 226.262409390222 355.92328557644 190.960237766104  
 190.375732394043 204.490115029568 166.847053797281 231.060688044554  
 263.937966521917  
 ACTR1A 350.584135047249 345.876877384089 364.337811621248  
 393.944898808828 300.299201489787 527.439095170064 444.858305070415  
 356.565801074289 311.149068752273 473.223156200183 401.202348352506  
 430.618167106529  
 ACTR1B 191.59357986481 206.103296228683 210.843643231855  
 142.840631375936 185.843333258735 190.442443946259 198.257381933305  
 153.462055740758 235.101442092497 291.327030793085 293.883582116334  
 250.585851778133  
 ACTR2 1012.0373748933 1093.04440713629 1058.61208471961 1483.40077183826  
 981.039763059681 1183.62228577053 655.389317052689 1001.99175009124  
 758.462554576949 385.064309855006 571.170643523692 912.757335169259  
 ACTR3 107.637618676176 149.397632479523 133.576489624155 246.869486382264  
 110.729504563799 172.433936159136 109.14984236229 121.510087314197  
 145.791398829369 109.844156801015 105.406282523992 171.043935516593  
 ACTR3B 42.3620028137457 46.0713306971594 49.33855351691  
 41.2507419031133 56.2305155589239 47.5216423686268 49.1928206164702  
 42.1874057736633 52.5380506348717 44.0409178714232 43.1724740315182  
 45.7979032939211

ACTR5 99.9752275166514 71.2370255410834 73.967017874248 65.084620579901  
84.4230484528318 69.5645254789371 79.4485571328293 78.5375244257332  
90.3485862002091 86.6246917308185 79.4832790698673 72.5346469941833  
ACTR6 129.938114164087 164.205608279417 181.516519907011 171.238235624104  
176.861690566909 178.688550924272 254.112875195524 214.369365247268  
230.09336914921 252.82316545981 201.180226922613 298.670959394883  
ACTR8 42.3433931248155 73.6855877240541 64.9072331703985 63.1604223919703  
75.1674447943072 58.1798515131249 62.5506324864207 52.5098795466615  
53.3932110698117 46.8954576545929 52.3761286517985 55.3563533836982  
ACTRT1 69.7442393277127 48.7847528954724 52.2132783757422  
50.2163892855092 52.4370718282084 53.4466111440611 66.9239565096247  
83.0497574039035 62.0967404944031 61.1851254827343 53.4921736109774  
51.4968903591058  
ACVR1 293.755623192857 206.559526386642 193.897678586782 320.504100222566  
179.629622763381 195.654315886452 95.2218627805387 195.168348967505  
147.023857419777 274.445985892762 256.766675299448 252.313870846326  
ACVR1B 80.5794942236641 81.909815795953 94.1627883101274  
107.391994714261 91.6649478634836 69.4214927857472 105.45765455249  
105.53472751588 155.239308003808 169.838827072973 158.17598244564  
129.909461876076  
ACVR1C 37.6397652536077 40.5400384479766 44.2405728317107  
42.2496337895968 40.2449343247539 35.7034203372528 44.0687697278114  
44.7044140979108 42.6366765186182 37.3179578037963 38.8507804383261  
42.7782216342806  
ACVR2A 76.6094442444074 89.3342384381684 78.258486366912  
59.897987870592 87.8681250426295 91.0847547974748 60.5125774827425  
53.2808392130566 85.4790745407113 98.2843999216669 104.076098789396  
91.4786089554886  
ACVR2B 37.1485601150873 36.1689925825846 38.5045333213784  
35.4355497822498 38.2496050953547 33.6248915845234 40.1235656101329  
38.132587347852 33.7574445386307 37.5597671487621 37.2559756339764  
32.4951076826876  
ACVRL1 74.9006142438341 73.4899394858239 72.7987593815919  
171.238235624104 62.9553576299033 149.856848496725 46.4388841354122  
67.6082563445866 41.1742244762318 75.3333024462557 108.779357041421  
76.3824005526731  
ACY1 160.320045581768 708.005870621064 607.042450917813 119.253559091088  
660.295993198711 163.742560819575 354.634819362978 203.109765192983  
1136.88710104691 239.590143292142 301.139592414061 227.567182783564  
ACY3 37.6397652536077 42.6022652963326 40.5734458834617 41.8778873678551  
41.6806984441849 38.7340969861754 36.197424053556 40.1474543172332  
41.7627910693483 35.4990901121893 41.0050831223107 33.6902293666089  
ACYP1 106.418690759491 62.6984594468418 76.3583555666815 59.3549213146532  
106.418690759491 72.6824533717231 121.487591828005 69.5380697712471  
85.7111041637416 77.0927030014721 86.7076796107636 152.47776741936  
ACYP2 55.0078788655089 95.3222932230888 86.6798536307388 67.474556589181  
83.555058970129 89.680151549258 77.8220670093392 93.299474822664  
87.404437522542 73.2445837559745 73.5788549535062 99.8754776648876  
ADA 133.229859346689 131.045615546105 188.513581321162 263.765914589758  
205.854666205308 234.727123301682 89.2913927776683 164.62751527755  
182.31306890697 82.475816811779 80.8366627364071 90.5732028806631  
ADAD1 38.0089018744739 35.9305494063137 40.4882741869718 37.7469621225553  
35.2163900400329 40.650742261428 38.941855825269 34.4896350146096  
36.3649677956953 43.9450023643394 36.5359455830388 35.9604262434141

ADAD2 41.1523487516364 42.8542642792862 41.1367478979484 41.7614975630362  
46.3150221024046 35.8227939208521 48.8319884367456 42.2577689927563  
55.4030910454028 51.3351387089044 41.9908237694988 36.7762265039864  
ADAL 47.9175508887533 43.0227387991135 50.1860191642359 41.6564075217517  
57.2960245538881 56.1671440556142 42.357910063876 49.5185112777773  
48.3954967265007 54.8979897528792 52.022479439889 53.3059058105836  
ADAM10 76.8864157610323 147.017279035061 71.7997882389171  
69.9499565182502 130.336599857526 66.5234828659154 85.3930226794591  
77.2834482217973 107.741669334989 47.3791873993182 71.5249259772583  
79.9447969637409  
ADAM11 39.8662795144616 44.9370339275041 41.9666541498638  
39.5050383901884 62.9553576299033 51.1621379498014 50.8388984085636  
56.4779645313958 41.863927676552 48.8623729374733 39.4410515050885  
44.1452943804044  
ADAM12 45.9356781508849 40.6806219262998 39.4710743516517  
40.7941759414114 37.3730111198605 41.800198520267 37.4440365247457  
41.0920120134247 39.1433524273815 36.2802866890489 37.3377031071126  
40.9243125941198  
ADAM15 501.817654561915 385.36587480414 823.933615182634  
380.541502795438 740.994425128952 381.426926151034 471.046851874447  
894.486674059951 642.211963248041 189.984886903595 245.888237156849  
201.800572658224  
ADAM17 263.21493129287 74.2653431904071 88.0368652545541  
123.190887747662 122.160438114932 74.3187437598836 152.17335005192  
372.02379581293 114.230358276599 128.657014567195 110.440072569721  
100.962000280931  
ADAM18 40.5654775358427 42.2577689927563 44.1452943804044  
41.3027031037343 47.4548471240051 42.8598805316863 42.0605906240248  
44.293922970134 40.0403898620771 37.4302011516587 39.4410515050885  
39.6352613956998  
ADAM19 234.043251639296 70.9567983915276 69.727028012962  
188.582370265555 95.8149149211251 143.536318305185 76.8788592884109  
79.4593310742125 45.7226406704445 109.25950270396 94.5111909776371  
156.822939275312  
ADAM2 43.0930293831497 46.7591817286632 45.1569741609597 39.3750969348308  
40.5710637884029 47.8636003588181 38.8417151851134 47.3791873993182  
50.2223403889892 36.8059561571675 43.5710871617107 44.2527566343661  
ADAM20 40.2543341073001 38.3322849790657 42.7303139017786  
41.4273122914951 36.2048942610546 36.6271061451613 31.5556621809114  
37.0390589468421 44.5303781239209 41.9666541498638 40.9157352260901  
32.0636251428594  
ADAM21 48.1125722136997 44.8529259387308 49.7350276169552  
44.7980740332174 43.6587492470348 42.4580504587581 46.8613212048981  
40.1474543172332 44.3440839686558 42.785429206422 44.1148826235374  
45.3763275588341  
ADAM22 36.7631292849091 35.6027791404152 34.806104801006  
36.7128997214853 36.7356360093603 39.8455060654531 35.1714932603619  
48.5681478665796 37.9849928059771 37.2089297656361 36.0947367757232  
40.1179210534118  
ADAM23 55.4004611309636 51.2405397507224 40.931294690669  
59.4674205670657 63.3638417360105 44.3648993568405 49.1067959632109  
55.1109784383525 49.3780606970538 45.1569741609597 42.7275315121163  
36.7762265039864

ADAM28 43.4626049853157 45.7023929486654 42.381482941987  
44.7520317855773 41.2457941494573 39.3638967048812 42.57175366709  
38.2125616761557 44.2952004276566 48.5330664799905 51.1483696410762  
57.5941849631773

ADAM29 44.2350046179299 39.6123051184545 36.3604951341921  
37.29566077996 35.4484652445078 40.5281496800812 35.7055410599146  
45.9604707098953 47.7086093893038 37.4302011516587 45.7328341667151  
39.9519547348106

ADAM30 42.9104454767916 42.0709558258414 43.0016969050339  
42.357910063876 44.0451487108213 37.3799542961839 41.0381860307445  
46.695848687694 42.0621425894624 37.1275334308172 43.7585538437696  
41.863927676552

ADAM32 37.3463875295726 38.5252456306656 40.3397581924196  
39.7840818430159 41.7525817198982 37.2039944420316 38.1793598983615  
40.5640952422779 39.6413313949444 38.957687788868 41.4959139197962  
42.3152792870779

ADAM33 45.0985088502363 44.7829632472754 41.6550823405646  
48.4916117779992 45.2556760873335 55.3202238943712 44.0137388752186  
45.8108990837624 44.1211971585961 43.0177448037924 45.9725715538987  
49.7336769474446

ADAM3A 38.0508336668122 38.0226905622357 37.1175717254729  
38.745552403895 37.5556299264699 39.779935291659 39.8390535343912  
41.8792703207442 38.401850731664 36.1550293353654 36.9060997041453  
38.1945786164609

ADAM5 40.6957787921451 39.932537801639 40.148780650831 40.5484717678957  
38.6213341190836 39.2985791324641 46.7100796279384 44.0390019242862  
39.4762546236449 41.2276963324981 40.547835538778 39.4830039788612

ADAM5P 39.0620487644635 42.1607322031054 46.4569566520107  
36.890925044696 39.1650142708257 40.8634043028528 40.2154497375715  
38.2782436497441 40.8970401536578 40.2112371512838 42.170702295259  
37.4554876386402

ADAM6 38.3418933808844 33.4316681623175 41.1367478979484 42.4061338151892  
36.8400213077707 37.9430145836712 40.8681871019812 45.0972184964705  
40.5912213523345 36.2885860224741 44.4329005595031 40.1235656101329

ADAM7 46.8141313516997 40.5400384479766 46.7508829977587 71.5249259772583  
46.3150221024046 45.0882356578404 37.6036146841933 47.3791873993182  
40.5912213523345 37.1275334308172 44.6286581923295 46.7182294568603

ADAM8 114.404099081799 210.919385184575 215.15351875081 409.554706384667  
72.9154861179393 60.5803031036931 175.820979889343 132.52749757795  
61.5807110546718 72.961444366037 73.3321469094819 77.8620267163666

ADAM9 73.6362523983338 87.275548276476 101.494432845825 80.8728961146267  
79.0039595317374 97.4062608315831 68.878562323012 82.0925058822176  
64.0541263553251 73.0394191668858 72.3822545261582 95.491982090349

ADAMDEC1 97.9806802695685 97.9305595485282 53.0630927250439  
341.078728185917 81.0259717888094 43.5416683728269 60.8857255846432  
74.8270640933572 37.6630259432398 37.2686490268265 40.2649309204478  
48.27609330316

ADAMTS1 59.1311136551108 147.017279035061 152.132756414024  
115.913030448537 128.38299874379 775.515071756239 47.7390230243778  
134.952392466784 100.178375869002 110.785049776763 168.482495410546  
137.378222527303

ADAMTS10 43.4626049853157 42.6022652963326 35.9305494063137  
44.550322123994 41.467005949568 45.4882438975269 38.4005795891396



39.7509165247419 40.137818555383 42.1622837416589 45.0589947942306  
38.745552403895  
ADAMTS12 38.6454098044474 41.7337506166619 34.8956628705329  
40.8681871019812 39.9697332660833 38.8336427948187 40.4359177791566  
39.5466975353131 35.3227485563945 41.5435611403119 37.2892641289258  
45.3763275588341  
ADAMTS13 39.2192721306168 43.3030298816484 39.3344387353654  
38.3684202018524 35.1872005076088 37.4782441311626 40.0668875818227  
42.5435283762933 42.2331334096358 38.957687788868 41.1367478979484  
38.2795150354677  
ADAMTS14 41.7780833969533 39.0894172982439 40.0599807618105  
41.6186264038868 40.9450021938518 41.9543948167375 37.6527901109005  
40.3662560853635 40.8351751854504 43.401782064778 40.7776803630095  
39.0536056496869  
ADAMTS15 41.3387790895716 41.6466169548846 43.4709415392696  
44.9370339275041 42.4864576619427 33.5578650644246 42.7431359850339  
40.931294690669 46.7760357462635 39.7835513496873 35.860430241131  
45.0035308952466  
ADAMTS16 47.2862299990938 44.0409178714232 44.8872784170036  
42.6913548400127 43.6587492470348 40.8634043028528 39.8695929627783  
48.7814131120945 40.6957787921451 40.7063426028871 43.401782064778  
41.863927676552  
ADAMTS17 44.6231541342 40.8880530359822 42.9104454767916  
57.0629653735694 41.5668884168669 47.0940613507321 41.8315602975157  
42.357910063876 44.8003345643334 46.8954576545929 43.0016969050339  
36.9976231206067  
ADAMTS18 36.9660447385262 35.860430241131 41.9666541498638  
42.281606728072 40.7779767565889 39.8455060654531 40.2601451506332  
36.6968906669565 42.0126083977597 42.9866214102525 39.3789825717286  
40.9683275553869  
ADAMTS19 60.562215295948 50.6774883370457 60.3155766445629  
57.2856683017619 57.5040500497076 59.0686629877982 68.673864919178  
59.6720198281342 54.7033747046992 55.5206840401643 56.3884556031093  
52.9609836781499  
ADAMTS2 62.8422809723679 41.0226232127351 41.2679739649179  
49.3654837541353 45.8669209716694 55.0009147092272 42.9803717121865  
42.357910063876 40.8970401536578 46.325232414659 37.5343260962758  
51.1897992768608  
ADAMTS20 40.0270326792985 44.9370339275041 39.6894175734463  
41.0057887014368 40.7369744663513 36.4448748739506 39.8390535343912  
37.9837233601316 44.7058233759912 41.8613406887824 47.9376640244611  
39.3931655934497  
ADAMTS3 39.1590964332473 37.8217989841918 42.640829914102  
42.8235313007746 34.0927410219282 38.6414316877471 38.6243997507646  
38.079222289614 42.9020321355927 38.745552403895 37.3687900733549  
39.5418280570561  
ADAMTS4 40.3478825593224 40.3384318592985 46.4569566520107  
41.3027031037343 45.2556760873335 48.5835484742456 49.3854238365325  
46.7980335276155 41.074824727477 38.6454098044474 41.8168470823451  
39.0536056496869  
ADAMTS5 52.2236479204029 49.83247261979 43.5710871617107  
51.3851157261451 39.3667161654772 64.7905331739366 40.2154497375715  
42.357910063876 43.2761454096265 55.4037482627222 38.956280281655  
49.904979214379

ADAMTS6 47.6397712007919 43.9421822132391 44.3344900481112  
56.0794100106654 40.8873907150245 45.1873487463472 35.8227939208521  
45.2806199505029 51.0062122023297 44.7958122466628 42.0750889188255  
42.57175366709

ADAMTS7 54.1745577382276 55.0009147092272 64.6111899743678  
38.5252456306656 75.2391243965793 43.1826328292558 47.7390230243778  
47.6952179922944 70.178974380507 50.3388505346542 43.9450023643394  
47.5025821041537

ADAMTS8 36.7356360093603 39.1982470626863 47.2055133646385  
38.3166554965434 43.2484996523549 65.4643755537228 35.4623691645629  
58.0892402609917 33.3643994200057 40.8049408996274 47.0110068985119  
61.8529316708431

ADAMTS9 77.9057333780847 73.9376772899278 140.504336039225  
134.567947469561 90.385018479478 123.674164545425 47.8947595316832  
129.605603092944 40.6957787921451 58.115198353247 63.6057995724852  
111.691813916343

ADAMTSL1 43.8678829064872 39.5050383901884 41.7397731376692  
43.8485914240791 41.7929491793697 43.0860383229288 38.7718834335368  
42.384269090877 39.5404280901064 44.5276078676423 38.1207627353276  
41.5937402943136

ADAMTSL2 210.255784687052 151.255948388415 260.656475394736  
102.786429761295 109.922909644299 79.0940380276977 52.0942589368478  
92.4953883194488 54.7966692984192 145.193498675059 223.397586938079  
139.472956453414

ADAMTSL3 38.385865183581 36.7976562409506 37.7384958256497  
35.6928955245309 42.4864576619427 51.6053353177789 31.9682164860619  
35.7973685350741 42.2577689927563 50.3388505346542 54.8532558909227  
44.2527566343661

ADAMTSL4 49.7336769474446 47.7233409198209 44.2771355310435  
62.7377155597666 47.6884372645373 74.4851052263387 43.6753843488695  
41.2551966132486 37.0478905185041 57.9713749600418 50.4022543872993  
53.4175306626669

ADAMTSL5 71.1521292570086 46.0023068797812 61.356483470053  
39.1706564265495 53.1884505015411 52.4351670989268 46.7100796279384  
72.121833189378 54.998510746958 66.7299966077909 63.6057995724852  
60.7495043977707

ADAP2 159.071016200059 147.017279035061 101.804757613639 312.589169184897  
131.365512154718 201.486224052899 94.6952414258466 147.187118389181  
57.7865070833351 71.5032996449402 74.5654028199926 98.9017950719795

ADAR 522.377154567257 446.162602155964 551.915864019927 501.817654561915  
535.313561995599 369.584648534533 449.243439865944 492.519023728038  
382.744696166534 394.073743195755 458.861461526841 328.548716133094

ADARB1 118.714977712617 72.983338488605 79.4528447794527  
92.1455386560941 94.717335243904 502.205366225368 84.2104160850167  
88.5140510969737 72.9274964092369 275.222714101589 308.393270347486  
339.52415679299

ADARB2 44.0328992213727 35.7393138893354 34.9849896310235  
39.5050383901884 35.1411239266238 35.9305494063137 41.5817737564592  
39.9576138799997 41.4636047919453 42.3606390470387 39.6403089864678  
36.9976231206067

ADAT1 156.636360703756 211.196171061328 253.980053738171 137.176719695561  
139.712472369259 119.333788465158 144.928534157065 208.189151365575  
207.600413958886 138.637058021129 165.107387190373 167.920131968611

ADAT3 111.248876636045 78.1623301184313 70.6592421895338 77.2218991550552  
132.400225103653 56.0477607422828 68.2708120569221 85.6170780640867  
93.8042295944812 62.8201270538435 71.9658486648999 57.0524725494273  
ADC 67.2437599548936 45.3486182278177 43.5710871617107 55.0604256312495  
51.5888395924843 54.2503023961401 41.0381860307445 65.1637149462661  
48.6494451061637 61.1851254827343 57.0154839296649 49.7336769474446  
ADCK1 92.6545309624315 76.4439037944547 112.977333058979 89.9284109077375  
77.7140342228764 78.1952428431942 72.1401612718245 93.9880852748373  
107.961407367823 115.414481087246 136.482957391332 83.0460206754856  
ADCK2 370.917477324773 368.913147706435 382.425576479893 294.155188719236  
491.468862309918 209.551557135809 423.896735383118 356.565801074289  
678.684833360104 425.776214512634 426.276230164353 316.660303090646  
ADCK4 62.3042205863409 66.3904351698776 56.2441895183416 41.1886975241176  
54.0126916508417 74.6375749739389 61.8571521441451 74.7794253940974  
63.6222532132037 78.59966540743 62.6048727240291 51.9447450229707  
ADCK5 97.0254711947754 95.5627648703794 84.4443931765378 64.898351831341  
87.9297641099558 64.6835308827804 74.0039764902057 67.2714646016644  
94.3537052300317 85.5439309325541 77.9085946827079 60.0940570991178  
ADCY1 49.7827734675743 47.4076235350059 54.1157382341041 42.281606728072  
60.4684603480369 53.63657997649 46.5650556481721 59.4674205670657  
46.2027193115397 49.461728580617 43.6629145624937 47.3661873039785  
ADCY2 56.1912096308988 44.2105195734073 51.223859150798 71.3932787152381  
54.3116862772198 57.6034762511847 62.5506324864207 49.7309743973184  
56.2441895183416 55.1089864632456 51.0492389286271 56.1875519519366  
ADCY3 264.116434279258 606.761670821739 563.065549077627 554.163106145921  
558.215290347282 510.232992765054 480.386431986343 823.933615182634  
330.096171705212 388.661268904002 496.163796158189 448.383843915421  
ADCY4 61.6544855697851 87.9152471471338 115.256208610595 140.662969373546  
70.18594926052 131.319040057576 40.1235656101329 79.6133633483649  
34.8552366193358 70.0907269565408 110.818741525514 72.2211523775459  
ADCY5 38.957687788868 38.4330755397458 40.7620472083159 34.2080003860523  
35.3327761997046 51.8103411703261 34.9344532055397 40.6171774724171  
28.5895665533366 56.4553747079294 49.4593570700221 42.357910063876  
ADCY6 104.796373568883 102.605473054584 160.033150948641 67.3439996689706  
92.9136587752031 88.1068080491008 122.824055084598 234.946245049134  
92.3901719424121 133.720493104769 113.444217634165 115.441414762268  
ADCY7 62.0553450433433 56.9312835667828 45.7968648044613 78.9479233685889  
46.0977687311222 51.9421032049606 51.0013344286851 56.9299697426319  
45.5779686360641 57.3562426592112 49.8393069675192 51.0647893605839  
ADCY8 41.2424637338424 42.7775752471711 44.2405728317107 39.7411455670172  
41.9842695818285 41.159706131351 46.9929836306816 35.1738399826814  
42.6366765186182 41.8613406887824 39.0550139257658 37.4554876386402  
ADCY9 54.7786516309154 60.3093790894864 46.4569566520107 53.8086134112366  
46.6397391251762 135.985408824299 39.0458123429605 47.6952179922944  
63.2753814090696 81.6233038764401 85.3930226794591 98.1220820761255  
ADCYAP1 56.921728372453 48.9899488302637 50.1860191642359  
68.6379135603075 52.2089306840125 159.416887501941 46.7100796279384  
45.1714698794331 43.1805016690297 47.3791873993182 47.0110068985119  
49.5539622682049  
ADCYAP1R1 42.7150227340364 46.0023068797812 41.3366779545815  
45.4634652319753 38.0598374201407 42.2577689927563 45.7452456977857  
47.7889447429963 38.7298222155532 43.6033221838149 39.9899430628542  
40.6614700944853

|         |                  |                  |                  |                  |
|---------|------------------|------------------|------------------|------------------|
| ADD1    | 508.474794786176 | 830.295872113419 | 942.247437385029 | 588.736435715365 |
|         | 509.671528514181 | 1345.37091574015 | 683.75696650704  | 541.631969808467 |
|         | 744.080606078086 | 1718.44944271916 | 1921.48678333837 | 1093.04440713629 |
| ADD2    | 39.2076937845359 | 40.0230205296014 | 40.6312687664188 | 42.9969462198633 |
|         | 43.5544347011646 | 35.2067831864574 | 41.3594868055879 | 39.9091538088603 |
|         | 40.0870341983328 | 39.1269447164792 | 40.3180310664156 | 39.9519547348106 |
| ADD3    | 85.0065217565876 | 135.106756607914 | 116.461730749198 | 94.7283425282671 |
|         | 68.534940191185  | 215.831300220615 | 98.2074490157865 | 120.426087248804 |
|         | 83.7019398654324 | 175.960838580876 | 157.312247745825 | 171.270750760376 |
| ADFP    | 1001.99175009124 | 437.542517888395 | 327.024556075244 | 1217.21440297138 |
|         | 1136.88710104691 | 567.978225839768 | 539.188951045594 | 309.102633242573 |
|         | 575.863848923457 | 421.971171686029 | 427.818758455214 | 1539.35554229258 |
| ADH1A   | 46.263826584899  | 108.019575675653 | 47.7737810047679 | 41.0726336841311 |
|         | 51.5888395924843 | 2672.94421680196 | 607.431621448599 | 64.964255000378  |
|         | 358.979854534484 | 1114.15989325456 | 844.431085166353 | 422.58866112053  |
| ADH1B   | 40.5654775358427 | 44.5152708955623 | 35.4484652445078 | 42.357910063876  |
|         | 42.4864576619427 | 372.982648892131 | 42.629412460409  | 42.2577689927563 |
|         | 42.0621425894624 | 235.925374041038 | 178.012676342712 | 84.7947249929138 |
| ADH1C   | 40.0557788909923 | 66.5864907685351 | 40.931294690669  | 39.3750969348308 |
|         | 37.6527901109005 | 126.319731178054 | 619.950241162173 | 46.4672637826582 |
|         | 301.025314855652 | 62.8201270538435 | 61.4121672148248 | 53.4735821194294 |
| ADH4    | 42.2618615571566 | 39.5050383901884 | 39.9101908547397 | 40.646702696033  |
|         | 40.8873907150245 | 39.3565586789274 | 41.0381860307445 | 45.4757965005055 |
|         | 39.7537274655115 | 38.8507804383261 | 39.5792604499113 | 40.7704587752083 |
| ADH5    | 47.3791873993182 | 46.4385386401326 | 34.1806289878747 | 37.0732977341185 |
|         | 53.3086645804786 | 95.0026207727863 | 47.2927436772465 | 42.9301944191913 |
|         | 58.6431245059655 | 48.0211752672327 | 54.113533179847  | 67.1675878355908 |
| ADH6    | 37.9387791625384 | 41.9894412416874 | 42.5406888281114 | 46.0228732507872 |
|         | 44.5668141895992 | 44.0804700754786 | 62.9165938167938 | 43.1567024035183 |
|         | 42.6366765186182 | 43.401782064778  | 44.553780984244  | 40.5703581862752 |
| ADH7    | 37.7384958256497 | 80.0502531022254 | 43.8495248991589 | 38.4208429103799 |
|         | 41.6806984441849 | 38.6414316877471 | 42.7431359850339 | 45.642304356051  |
|         | 137.10896135739  | 42.0621425894624 | 44.553780984244  | 39.0536056496869 |
| ADHFE1  | 44.3355304829989 | 67.2649356062263 | 129.501808300251 |                  |
|         | 56.1780366332082 | 59.135659721231  | 95.0026207727863 | 42.4939802311136 |
|         | 69.4009439491061 | 40.7460990419215 | 122.15017220566  | 92.0711167984454 |
|         | 105.05842887748  |                  |                  |                  |
| ADI1    | 43.6706764143908 | 52.1062000766427 | 43.5710871617107 | 36.264823544143  |
|         | 50.2163892855092 | 49.4157684139858 | 39.6535880152834 | 41.5464765641928 |
|         | 54.0192060888782 | 59.6863210839828 | 51.7538628098347 | 48.6037684272115 |
| ADIG    | 37.8386378737561 | 40.148780650831  | 49.1067959632109 | 41.6564075217517 |
|         | 40.5710637884029 | 43.0860383229288 | 46.0228732507872 | 46.3685439301234 |
|         | 43.3744503319109 | 46.7646877499666 | 43.844855336215  | 38.8495095797881 |
| ADIPOQ  | 40.9558083259517 | 43.5873188565519 | 41.0356368374708 |                  |
|         | 48.665578118898  | 37.5556299264699 | 39.3841861812262 | 38.8417151851134 |
|         | 46.7980335276155 | 40.6957787921451 | 48.2596564318071 | 48.4717951775049 |
|         | 38.8495095797881 |                  |                  |                  |
| ADIPOR1 | 278.140612054333 | 312.245547906683 | 472.159979716705 |                  |
|         | 411.254448823371 | 289.716911324484 | 217.533011278692 | 236.910422092851 |
|         | 247.676607756929 | 217.721787448311 | 265.667557678228 | 283.484056482174 |
|         | 355.288272452203 |                  |                  |                  |
| ADIPOR2 | 320.086549121732 | 257.851199206959 | 355.821515437298 |                  |
|         | 356.226114718307 | 282.328238928883 | 298.607482741423 | 268.990075898188 |

|         |                  |                  |                  |                  |
|---------|------------------|------------------|------------------|------------------|
|         | 311.502922515027 | 544.946796643478 | 307.754078087321 | 309.994784298282 |
|         | 303.818507395434 |                  |                  |                  |
| ADK     | 71.1521292570086 | 93.5358142196619 | 105.247736284747 | 67.5489259940822 |
|         | 114.445779948228 | 71.4792239075993 | 93.3216420803293 | 69.6272083256793 |
|         | 199.57367025082  | 80.5794942236641 | 70.9319024596628 | 98.6401096175932 |
| ADM     | 2575.86919902296 | 2921.68921750799 | 1127.96214301065 | 7323.77427153966 |
|         | 850.656711617458 | 1199.29782389306 | 2892.02001412369 | 788.232434009173 |
|         | 3043.12489526581 | 505.156485179198 | 1021.71286017481 | 1269.36837611919 |
| ADM2    | 69.9431447778061 | 68.307513091369  | 67.8010199320754 | 97.3870880869036 |
|         | 80.428712610358  | 73.2751502965172 | 70.5534237141767 | 65.813547096222  |
|         | 90.7037473522607 | 67.3308332069908 | 60.394307846869  | 63.4685821260797 |
| ADNP    | 98.9988668602468 | 99.0647786948132 | 122.099297248392 | 78.6344248102932 |
|         | 122.824055084598 | 79.4916415027015 | 107.668663185697 | 100.696072546592 |
|         | 106.907589984092 | 107.242476674629 | 118.795369922438 | 98.5339473137891 |
| ADNP2   | 144.266359480086 | 188.552900887757 | 193.468773556057 | 227.567182783564 |
|         | 122.099297248392 | 138.916915463074 | 174.117816184497 | 113.179313022693 |
|         | 281.452208033175 | 197.868575583033 | 173.08677862231  | 144.250839367023 |
| ADO     | 243.763402918148 | 117.165519915808 | 92.3034609409756 | 155.928417606775 |
|         | 103.968071466212 | 129.434864701718 | 115.861269747317 | 95.491982090349  |
|         | 219.676249419297 | 151.451107406752 | 120.418406532204 | 128.230543301378 |
| ADORA1  | 60.1258784595219 | 41.6972107715212 | 38.4428081526233 |                  |
|         | 42.357910063876  | 41.3440240757217 | 39.4953494583071 | 43.0398514059634 |
|         | 44.8643898647322 | 44.2222841572272 | 37.6623366050401 | 42.6913548400127 |
|         | 43.9541718254769 |                  |                  |                  |
| ADORA2A | 66.3095900379311 | 77.0927030014721 | 75.4317740345967 |                  |
|         | 280.622184239624 | 51.4527545197672 | 51.294537308199  | 90.2915974511786 |
|         | 61.5824518349507 | 48.9931786790166 | 56.8201201798712 | 58.4816190076338 |
|         | 57.445796273665  |                  |                  |                  |
| ADORA2B | 80.0866955521632 | 132.588447812638 | 269.184000351658 |                  |
|         | 116.694275999729 | 125.333208461509 | 63.9650465690339 | 59.9792284253187 |
|         | 86.7710020879725 | 227.686495419561 | 86.3374157614394 | 82.5225075943931 |
|         | 189.80672643731  |                  |                  |                  |
| ADORA3  | 87.2394571967316 | 91.6777754418002 | 69.4583814833055 |                  |
|         | 211.451463038315 | 64.3003533494489 | 65.9014252111112 | 86.7968607218397 |
|         | 74.5173894803763 | 65.1129635608639 | 56.8875898013449 | 56.5896227808363 |
|         | 100.774098314706 |                  |                  |                  |
| ADPGK   | 235.888544042065 | 174.275409358652 | 143.706880936186 | 452.351360652434 |
|         | 244.089971761037 | 135.829530518199 | 203.808195515747 | 214.369365247268 |
|         | 172.39907939484  | 172.83517237888  | 153.103233619506 | 156.864177272437 |
| ADPRH   | 53.0290605707162 | 37.920964499903  | 42.7303139017786 | 34.9221408381038 |
|         | 37.7576900881741 | 43.1826328292558 | 40.0052661202207 | 37.0390589468421 |
|         | 33.0463640202858 | 35.3849221682845 | 37.5583886316038 | 36.5474283500601 |
| ADPRHL1 | 47.7737810047679 | 46.1835531253984 | 50.3950981988762 |                  |
|         | 43.0001432913058 | 54.2301964914419 | 46.263826584899  | 57.6075177910677 |
|         | 42.6975474602554 | 51.9247097592613 | 48.1907683998167 | 54.2999306485758 |
|         | 43.2776458914333 |                  |                  |                  |
| ADPRHL2 | 100.289042948128 | 116.094881058504 | 106.058751335133 |                  |
|         | 90.0942781313264 | 142.124053129543 | 97.2865629929716 | 163.62024333166  |
|         | 120.447568925399 | 143.122201568705 | 90.6805895192707 | 101.434947182387 |
|         | 121.969082013079 |                  |                  |                  |
| ADRA1A  | 40.5265498315468 | 39.2907645923217 | 40.7273974755431 |                  |
|         | 39.2524372699287 | 39.7312050662551 | 42.6200095806555 | 36.9355798143571 |
|         | 39.5259298883656 | 39.8067641711565 | 41.5685493982342 | 38.3684202018524 |
|         | 41.7575097298927 |                  |                  |                  |

ADRA1B 54.3554233228353 43.8495248991589 52.6275131390249  
44.265834798964 39.1650142708257 62.9688525319822 46.1634822993009  
47.5950227477807 47.27543600687 42.785429206422 46.4205654140754  
43.2776458914333  
ADRA1D 41.7397731376692 43.7644428186265 48.1997158668729  
61.7502624458447 44.4489662507893 45.7300501624017 39.7576136507593  
43.6434576713809 44.2607789091176 47.611018474151 50.8826620053386  
47.1060577218993  
ADRA2A 48.2910530887214 51.524711857679 43.9450023643394  
70.0402992940342 41.8806343997257 47.7556758818053 44.3440839686558  
54.5125550937898 42.6366765186182 52.7972156492746 45.8180710486329  
47.2131144508464  
ADRA2B 40.4639532172338 40.9731067463382 44.9758339877851  
41.7614975630362 41.5668884168669 41.0582900711341 45.8980298854198  
48.272324215504 44.619512785899 38.528621456378 40.547835538778  
50.656598108034  
ADRA2C 40.4179476219497 40.5852276210998 42.5406888281114  
38.0958223740111 47.4548471240051 40.5281496800812 43.9450023643394  
42.7431359850339 38.0213051227859 42.4594149893798 40.040778349137  
38.2350720635382  
ADRB1 36.8072833828297 38.6414316877471 48.2883694323339 39.5050383901884  
37.3508690072156 42.750861693377 43.3262148375525 36.9355798143571  
37.3600014814388 37.2089297656361 41.9908237694988 38.0452862258803  
ADRB2 44.9896851005259 96.981661155293 118.619819027443 81.8727530460686  
57.1935729219207 96.9739786719591 56.0515443021293 101.681822254799  
95.65872032796 135.973016473297 96.3495443565738 97.3929166450379  
ADRB3 41.8409927585705 43.8495248991589 46.6588655218735 47.9915414951747  
33.6330903323612 45.4882438975269 38.7337086062875 38.956280281655  
38.9006788676407 43.9450023643394 46.7386599624801 41.863927676552  
ADRBK1 38.8561375693335 36.4002279956519 38.4043916290561  
39.6292788039793 40.4639532172338 42.157627240486 45.6042625176633  
37.6557714476853 35.860430241131 38.745552403895 40.4504608195666  
42.357910063876  
ADRBK2 41.0608773166058 41.3610369241157 46.9040704638073  
37.7469621225553 42.0709558258414 37.0180934800573 40.4359177791566  
40.831207953647 39.7537274655115 34.8137085420423 36.5359455830388  
40.3691324547049  
ADRM1 309.102633242573 484.218958528411 408.739953606815 363.527881831453  
427.199940706169 377.847116683974 583.690350347288 422.104447912999  
583.421166842011 314.091389958069 356.025084823326 247.676607756929  
ADSL 539.720977763663 467.884559162462 423.608694638779 523.25106120389  
402.794855141389 565.72800641089 635.050535522135 512.821381202441  
469.30167430316 490.652353306749 429.983084929605 456.874884453965  
ADSS 241.455752070163 311.055487966495 357.254500791202 270.724111544154  
404.175196605897 293.300203370043 293.086409068972 222.985386635178  
305.684635013927 274.445985892762 269.618616631857 357.111253129662  
ADSSL1 74.3766944386886 49.1041309537036 134.271727318694  
49.6314545328943 56.7776874358774 56.5500409758451 48.2748123114598  
54.2445399731644 126.930102684077 69.2406343120143 60.8976148193383  
67.1675878355908  
AEBP1 2138.23653387331 219.582785177134 112.977333058979 432.945510073269  
129.270792739554 675.832363405287 56.0515443021293 269.546586017659  
55.8510296341925 442.380936516984 354.861943266984 179.342338803631

|         |                  |                  |                  |                  |
|---------|------------------|------------------|------------------|------------------|
| AEBP2   | 71.0340758556049 | 64.643220133046  | 70.4794854241035 | 66.9218519793499 |
|         | 79.7808217577226 | 96.9739786719591 | 82.7853677822046 | 57.7805922926828 |
|         | 98.1495112518979 | 89.8035133597498 | 102.87193290903  | 107.799236230743 |
| AES     | 311.055487966495 | 738.059797123491 | 875.139073253298 | 302.50850157207  |
|         | 582.017297217368 | 797.019657306322 | 571.790034754076 | 638.848775860866 |
|         | 689.228901128857 | 1154.6386362     | 965.530928317269 | 687.862452802453 |
| AFAP1   | 97.1131393750315 | 54.6538849155354 | 57.070382426461  | 64.5347406608537 |
|         | 57.5245761633468 | 88.9321928608078 | 56.1336444195175 | 63.4889805083459 |
|         | 50.7216807571528 | 117.293778127059 | 79.7389069715403 | 81.0169370911764 |
| AFAP1L1 | 53.0290605707162 | 57.5941849631773 | 82.8205269728224 |                  |
|         | 65.3191216270241 | 65.1757400078647 | 59.4949177415847 | 44.0687697278114 |
|         | 57.037639245179  | 49.9951674107458 | 60.7495043977707 | 59.4188882103773 |
|         | 50.8442982601142 |                  |                  |                  |
| AFAP1L2 | 75.9236575152151 | 81.4621222177298 | 100.645556491457 |                  |
|         | 79.1000897258245 | 75.7464604972652 | 71.6050174762551 | 58.6431245059655 |
|         | 115.155021677978 | 62.900814964804  | 104.068748231847 | 99.432142513601  |
|         | 88.6207486236976 |                  |                  |                  |
| AFAR3   | 41.1523487516364 | 36.2103905554984 | 42.5406888281114 | 31.8431345631453 |
|         | 36.4434672195785 | 36.9060997041453 | 34.1889222434768 | 37.1317006162938 |
|         | 31.1401844809132 | 35.4990901121893 | 42.357910063876  | 37.5556299264699 |
| AFARP1  | 39.4250105372135 | 40.0952076421149 | 37.8002829036779 |                  |
|         | 38.6835649080278 | 38.6454098044474 | 43.5752393599169 | 39.9559575274857 |
|         | 42.7431359850339 | 38.8271346375425 | 40.848280311228  | 42.8263096141654 |
|         | 39.5418280570561 |                  |                  |                  |
| AFF1    | 68.0700069295224 | 112.02980664709  | 93.0410625954471 | 119.39177524986  |
|         | 79.9971782971285 | 109.221269056557 | 97.4515987591398 | 105.308648028552 |
|         | 105.197692490363 | 86.6516906104905 | 108.12482131423  | 107.585504340548 |
| AFF2    | 46.5549623118323 | 46.5650556481721 | 39.9101908547397 | 46.0228732507872 |
|         | 41.0885562160946 | 46.3715909653832 | 38.8417151851134 | 45.7476095696859 |
|         | 34.226171989766  | 37.3179578037963 | 42.4580504587581 | 41.4508241771315 |
| AFF3    | 39.8234920704779 | 42.9887069977696 | 39.9519547348106 | 47.2009420656854 |
|         | 38.7004513165111 | 73.1169003714219 | 41.3094485574845 | 43.1931731665131 |
|         | 35.6970528713709 | 64.1097859982912 | 69.3645322033576 | 73.7986685173579 |
| AFF4    | 85.4713284900688 | 79.271901834289  | 79.4998723172096 | 87.6763065012524 |
|         | 60.9710783023013 | 110.202401893789 | 64.5722284870633 | 65.3715655467882 |
|         | 87.4335749014848 | 83.1874704625702 | 97.712117589297  | 113.008760911729 |
| AFG3L1  | 53.8278927154175 | 68.7227011958449 | 93.2402285327166 |                  |
|         | 61.9753438182501 | 51.524711857679  | 50.2957175518356 | 67.9599395822006 |
|         | 52.407151732257  | 58.2879293130296 | 63.6197695952215 | 63.3544794716167 |
|         | 66.0224755625662 |                  |                  |                  |
| AFG3L2  | 255.241295723095 | 293.086409068972 | 231.085533860683 |                  |
|         | 169.99300253813  | 397.520960156896 | 209.794541970107 | 496.163796158189 |
|         | 307.002236094206 | 369.877521477669 | 300.186402341399 | 336.390195295291 |
|         | 314.458148321064 |                  |                  |                  |
| AFM     | 39.3709357615493 | 37.1685072112618 | 36.769073068743  | 38.6414316877471 |
|         | 37.2567512265363 | 35.314469458379  | 29.0303154053123 | 38.1835938174625 |
|         | 42.9020321355927 | 34.4875013487777 | 33.8558232866797 | 37.8490162439785 |
| AFMID   | 61.2691385007595 | 65.1291617069903 | 57.4622430729629 | 53.1124375923907 |
|         | 75.3580625318157 | 44.0804700754786 | 62.1448806673973 | 62.9364422691302 |
|         | 63.4531374125233 | 47.9707112435212 | 50.4740079109854 | 64.3383155834968 |
| AFP     | 42.2455707947223 | 40.2493681589104 | 42.7303139017786 | 48.4916117779992 |
|         | 39.6535880152834 | 42.8598805316863 | 40.3302268293707 | 33.8558232866797 |
|         | 41.3803269429468 | 40.8970401536578 | 41.0050831223107 | 38.4330755397458 |

|       |                  |                  |                  |                  |
|-------|------------------|------------------|------------------|------------------|
| AFTPH | 98.8719561245756 | 68.9603421415748 | 67.0120793767211 | 77.9085946827079 |
|       | 72.1591028956359 | 69.64983895075   | 61.7695376560802 | 119.609614885616 |
|       | 76.6027293497456 | 65.5800543140431 | 82.8770530537113 | 79.8878785326568 |
| AGA   | 91.4786089554886 | 113.853553531089 | 164.62751527755  | 150.649377863375 |
|       | 66.0411740221276 | 58.2531879680192 | 102.626604917608 | 74.6572522248684 |
|       | 114.829148878375 | 119.634256037186 | 107.971806573919 | 84.4349803529132 |
| AGAP1 | 42.0532901689036 | 41.4223563635976 | 38.0057289062111 | 41.7144525110048 |
|       | 40.1151953732637 | 39.7394181011603 | 44.5390641547628 | 39.6474008369935 |
|       | 37.5469247328848 | 33.9967481174035 | 36.8730514568925 | 39.9941474864076 |
| AGAP2 | 41.2424637338424 | 48.109747794187  | 40.6737160001291 | 34.9221408381038 |
|       | 44.8897737954573 | 38.8336427948187 | 37.9430145836712 | 39.3709357615493 |
|       | 43.5669306063196 | 37.3179578037963 | 36.6298807161755 | 37.8490162439785 |
| AGAP3 | 53.0290605707162 | 91.0952554578659 | 73.7682148056628 | 76.5411379733694 |
|       | 85.0852996855365 | 56.1115976952096 | 58.1591117988945 | 51.3907321092333 |
|       | 76.1869593072029 | 56.7482794147852 | 71.3527183280827 | 51.6660481331154 |
| AGAP7 | 43.9309845324767 | 44.0409178714232 | 46.3411353377615 | 50.8567345921473 |
|       | 44.5668141895992 | 46.1513019317765 | 42.629412460409  | 43.5544347011646 |
|       | 48.8067321016961 | 49.8393069675192 | 47.1477056711335 | 51.0013344286851 |
| AGBL1 | 39.5676051939342 | 37.5469247328848 | 36.8124076923959 | 37.5764485234171 |
|       | 36.6354013629791 | 38.8336427948187 | 37.3799542961839 | 35.5179217192467 |
|       | 36.4816715148518 | 36.3612409063792 | 38.3684202018524 | 36.9060997041453 |
| AGBL2 | 41.2424637338424 | 41.8848959280916 | 51.0539624358342 | 40.5484717678957 |
|       | 45.5809132232681 | 47.6803619768589 | 40.1235656101329 | 40.3357777530419 |
|       | 40.2274522635576 | 45.2556760873335 | 44.2925355984056 | 43.1805016690297 |
| AGBL3 | 37.4554876386402 | 43.7644428186265 | 41.3366779545815 | 36.6501141438378 |
|       | 39.4693871570028 | 43.8582747295766 | 40.3302268293707 | 43.9366081640576 |
|       | 37.5469247328848 | 42.5664883002833 | 38.6662194645633 | 44.9070250604284 |
| AGBL4 | 35.4287975493553 | 42.8542642792862 | 40.7620472083159 | 44.1483976313959 |
|       | 40.7779767565889 | 42.157627240486  | 38.6243997507646 | 38.2782436497441 |
|       | 42.0621425894624 | 39.1621898366355 | 37.4642807402741 | 39.6352613956998 |
| AGBL5 | 124.041740442038 | 114.161435210562 | 98.1968987868987 | 57.165971310746  |
|       | 178.249889756228 | 151.831767769522 | 193.703214707909 | 192.058030454066 |
|       | 120.26537515666  | 169.527304857688 | 148.130140385248 | 116.374125502825 |
| AGC1  | 53.4921736109774 | 48.9259041798949 | 47.2055133646385 | 43.6726153508978 |
|       | 44.4489662507893 | 46.574682061365  | 46.1634822993009 | 45.0972184964705 |
|       | 44.8997235283254 | 48.4890615340603 | 50.0808824383821 | 45.8546719310325 |
| AGER  | 44.2760426402717 | 41.0269624684418 | 46.3057385979341 | 40.6857324478814 |
|       | 41.7405682794166 | 39.3841861812262 | 38.6243997507646 | 40.5158867964016 |
|       | 43.1235886043549 | 42.8482181313226 | 41.8168470823451 | 41.863927676552  |
| AGFG2 | 43.781101409552  | 47.3010040326346 | 46.7058093820839 | 47.8947595316832 |
|       | 56.2937283136959 | 50.6360662655392 | 40.968974769473  | 48.3077814647455 |
|       | 64.4837166864084 | 61.3529667465225 | 61.3733228199803 | 52.3896785600751 |
| AGGF1 | 81.1350396749303 | 129.653830303132 | 123.013017662425 | 117.539037885384 |
|       | 107.994880298791 | 95.3754438202863 | 107.251974803232 | 76.6094442444074 |
|       | 147.023857419777 | 94.1575209300592 | 94.0777119695783 | 109.714619050525 |
| AGK   | 159.603518169388 | 197.325473090277 | 165.867229890877 | 127.986477405999 |
|       | 223.316311787046 | 144.954155897343 | 182.885934774318 | 130.533514998688 |
|       | 187.147252401703 | 103.968071466212 | 124.041740442038 | 143.749408328062 |
| AGL   | 54.720204938924  | 57.4989424388426 | 54.106779254225  | 55.307880834418  |
|       | 49.904979214379  | 62.7924038489274 | 60.1837189855762 | 68.0796261751272 |
|       | 65.5349012839562 | 102.655050997714 | 79.6452419769253 | 81.929796716054  |
| AGMAT | 53.0290605707162 | 130.848965290163 | 64.2404293863468 | 51.949834638817  |
|       | 245.960009147234 | 49.1013967533186 | 145.267770598988 | 216.03402309102  |
|       | 126.485649460666 | 62.1035858593388 | 64.2174369755376 | 64.650642183463  |



AGPAT1 71.1737934325596 56.7272804480684 60.8635925649592  
 59.1771672022928 64.4999048115671 57.5685357492202 61.5000955267432  
 63.5738862549306 61.5807110546718 77.0226403968683 64.1829732120822  
 61.3216070188812  
 AGPAT2 308.393270347486 400.633619994399 88.7801816370065  
 131.738693662183 76.9535968101411 118.638732417836 137.410781124396  
 130.716532316693 136.935255842208 129.820909990346 138.728648830528  
 97.095992167029  
 AGPAT3 41.7397731376692 72.93977835851 63.5896512396512  
 45.6677978788306 63.994439164071 45.2421183842044 61.3620062177524  
 44.6107027295193 53.0145811822111 42.1414432370095 44.4688999098904  
 45.9693232070002  
 AGPAT4 65.7899239985344 47.2299678280724 47.6040671292013  
 88.3459116251233 43.5544347011646 59.4309046716701 49.2546642180676  
 51.3472428383325 51.2066664465185 77.0703146713865 56.9320717885002  
 56.2804354745795  
 AGPAT5 59.7179445506128 70.4933405598359 91.1834104205004  
 57.8277957325085 78.7320333941149 72.4651758215622 85.5027511448958  
 48.0582855095143 67.3230935444252 46.441301934328 55.6972661824064  
 66.9239565096247  
 AGPAT6 48.1952521496489 54.7855575216687 44.0451487108213  
 46.1673159982664 41.5668884168669 45.9266745571724 40.2154497375715  
 44.1311654985682 38.0213051227859 35.8304004211528 50.7159667633757  
 45.3763275588341  
 AGPAT9 47.8249696958403 45.3486182278177 51.7138050344355  
 96.7799695976296 40.5710637884029 83.5274372175811 51.7714254834195  
 63.7002949745101 49.3780606970538 66.0224755625662 57.8991270166934  
 78.1623301184313  
 AGPS 209.138751343454 146.432425205891 140.719373122712 230.197573134703  
 244.226756210656 198.754967214875 138.923143963742 191.116764060948  
 117.678385591938 107.610858427836 115.052948380817 179.522572239758  
 AGR2 67.7831020218081 117.706922397135 103.64431747876 34.4382958501338  
 53.4109882045447 45.3882138838137 52.4111687156893 43.6434576713809  
 92.4839055864605 67.1278109419819 73.6362523983338 78.5108643908344  
 AGR3 93.3605294458382 41.5132248356707 41.9287023391451 40.8084239472012  
 45.6895223823001 39.5581166303303 44.9094465483072 47.4439407315335  
 43.1805016690297 40.8049408996274 43.1931731665131 50.2471139112912  
 AGRN 180.592281750722 227.791956085471 218.773587021224 66.224559122062  
 112.391188787919 58.9676332048764 147.115466503902 372.421330252979  
 239.385229462309 166.349012388957 219.771890732457 127.345094323724  
 AGRP 40.8681871019812 40.5400384479766 40.7222199182322 92.1725548553384  
 41.3387790895716 38.5252456306656 37.7136011474903 40.4359177791566  
 44.293922970134 38.4829727716328 39.2542963855807 38.2350720635382  
 AGT 40.5654775358427 51.0175677516029 41.528370959196 75.2475238554276  
 63.3638417360105 46.8954576545929 38.1793598983615 48.272324215504  
 40.0403898620771 39.5637454855233 44.8872784170036 43.6753843488695  
 AGTPBP1 92.9894133685392 64.2621389350588 71.2246788429078  
 174.332103484796 66.3075095149783 82.2838944641385 94.312912693545  
 73.0186209472046 57.3005868295668 67.6733764807973 63.7598547294225  
 72.1687283197901  
 AGTR1 54.0170817319522 43.3016395799961 40.5734458834617 41.2445895434274  
 43.2907292669418 153.028210322286 37.0564573649223 42.1860813954352  
 45.4799270968969 86.500678864429 76.5505585423421 58.4598072919688

AGTR2 36.2496364442264 42.5269793679335 42.5406888281114 33.6816578730693  
40.8873907150245 41.9543948167375 47.4439407315335 45.9604707098953  
40.3316153483289 40.7063426028871 45.4799270968969 37.5556299264699  
AGTRAP 91.7437837246405 68.1040271620925 74.3239491140189  
102.365615739399 74.6833250738044 72.7213787264217 88.3954618645976  
60.7942162859036 77.4769634299218 52.4887473044594 62.1397042662581  
65.2670315837785  
AGXT 52.4179224871914 35.7393138893354 41.6977706798234 38.745552403895  
39.0564222526273 44.3648993568405 39.0458123429605 40.047314525032  
43.8482802038826 39.1621898366355 37.6484782516569 37.6557714476853  
AGXT2 34.6977013306396 42.5269793679335 35.5220586859301 43.8002456102021  
50.7615314686244 35.4142595025086 40.4359177791566 40.7311497914871  
39.5806465938526 46.0119912782855 37.7384958256497 40.9683275553869  
AGXT2L1 42.6036491382658 41.8534933577029 39.5118967430322  
38.8495095797881 41.0476065156912 39.066284740632 40.3302268293707  
40.047314525032 44.8636979668258 40.9558083259517 43.0016969050339  
40.5703581862752  
AGXT2L2 79.1369056968656 76.2193772627406 103.189199090363  
117.408885431274 72.2016884438365 97.4967204298499 62.6236991757723  
80.4967881959046 57.0690683036183 91.3418781023824 91.0847547974748  
91.4786089554886  
AHCTF1 103.080153415433 106.595042669127 107.844799332742  
130.615540145155 150.529917336161 124.56803502087 133.41667178516  
135.757061334489 97.9586375307737 109.922909644299 114.657635596229  
109.832638804839  
AHCY 629.763102939071 755.852629128252 432.945510073269 436.35723605534  
1509.04753111016 640.596557352885 785.79878416775 633.819901764391  
811.142611128461 569.244038644604 560.954913956997 579.038638774301  
AHCYL1 526.146757036152 488.649780652311 379.79657860938  
348.165210494253 365.459728613746 506.75912743556 367.685570437603  
716.754656773542 684.238999553691 688.612748336336 785.79878416775  
874.419252731128  
AHCYL2 75.9909523932333 82.904037973319 104.135574209392  
76.0975301977715 66.0411740221276 70.8674195845729 57.8870110456492  
71.5062409407193 90.1430468048409 98.1835264890769 83.5895816521251  
79.5898953726467  
AHDC1 68.3234331335073 78.258486366912 72.9051985681184 63.6334154351075  
69.2787430208317 72.3523300799007 65.0031119608637 51.555506218204  
63.8740412329753 60.4837400912239 72.3822545261582 56.1875519519366  
AHI1 98.0307965290686 92.5391033814713 112.532906407663 155.928417606775  
84.7782034884529 152.17335005192 102.913039837094 181.093943398293  
67.1278109419819 168.926743047741 143.042664581646 132.036058401203  
AHNAK 433.447319956981 256.55408314817 278.850071205987 351.114115662108  
188.30834153268 711.773459577386 168.70463124443 245.960009147234  
314.992390390165 757.833254346899 653.880422442079 567.675954219815  
AHR 1366.59129560817 1369.13346566895 1149.90692951795 1511.33844030783  
1752.11152588494 732.454837219705 1664.00821059181 2545.03032507597  
1317.29255644089 1686.40194722823 1855.0119962662 1375.14388134842  
AHRR 42.7150227340364 44.2105195734073 43.0016969050339 43.9282059368202  
45.8051846088552 40.4359177791566 49.3854238365325 44.1311654985682  
45.2897806651929 34.9138625012006 47.0940613507321 44.0451487108213  
AHSA1 530.710127703061 259.332340491331 295.371694979522 289.975375372371  
433.320698413679 483.882804472844 377.679662622526 260.581111456578  
390.906200053021 273.593213694396 325.949742917126 341.020604260602

|       |                  |                  |                  |                  |
|-------|------------------|------------------|------------------|------------------|
| AHSA2 | 89.2913927776683 | 65.9098543816057 | 94.717335243904  | 39.1706564265495 |
|       | 134.099684731177 | 78.6402083787251 | 58.5087296620514 | 68.8058577447202 |
|       | 57.8772482723463 | 124.362644216178 | 80.0113001016496 | 101.403739410832 |
| AHSG  | 41.8409927585705 | 40.6380495994768 | 37.7384958256497 | 39.6292788039793 |
|       | 38.4540849632254 | 39.4953494583071 | 39.4600924554505 | 41.4508241771315 |
|       | 46.6944238390932 | 37.1275334308172 | 37.6484782516569 | 41.7575097298927 |
| AICDA | 38.304249186058  | 36.3110701990588 | 43.8495248991589 | 44.7980740332174 |
|       | 40.9950639693255 | 37.0180934800573 | 38.1793598983615 | 33.8558232866797 |
|       | 42.6366765186182 | 40.5090849993014 | 36.43924066428   | 35.7451401627836 |
| AIF1  | 167.352766082239 | 119.947688643528 | 125.221639689345 | 662.041552795049 |
|       | 94.8408264309872 | 249.729778471447 | 119.905655993777 | 188.196662406725 |
|       | 49.4786466722535 | 80.9907498621309 | 57.6171094774963 | 119.39177524986  |
| AIFM1 | 103.631449539809 | 130.177232923004 | 94.3450965454031 | 96.1825551158198 |
|       | 165.29964739949  | 103.955842514553 | 106.367841843476 | 114.445779948228 |
|       | 130.925724760241 | 87.7918574811458 | 86.1633564934019 | 104.611421732227 |
| AIFM2 | 57.1046180136491 | 68.6074516459969 | 45.1569741609597 | 39.7411455670172 |
|       | 48.3814421939888 | 64.7905331739366 | 83.6935756500468 | 56.8094693588238 |
|       | 62.370559099758  | 59.3618843678775 | 54.8532558909227 | 62.4743608775767 |
| AIFM3 | 40.7609952437622 | 34.6306468196142 | 35.2838283525874 | 35.6928955245309 |
|       | 38.0598374201407 | 44.2607789091176 | 43.1931731665131 | 37.4484310268909 |
|       | 36.8127605061228 | 42.0621425894624 | 40.1742127891824 | 38.4330755397458 |
| AIG1  | 188.386331007465 | 276.360065404067 | 207.632489510045 | 100.001150612051 |
|       | 111.77505926669  | 92.1151486847283 | 108.263706890599 | 144.034489386072 |
|       | 103.934830132715 | 145.819204020818 | 178.525751043592 | 267.565744773928 |
| AIM1  | 93.4355842714864 | 58.9128486419884 | 49.4573631027613 | 53.3967242431461 |
|       | 46.3150221024046 | 48.5835484742456 | 52.7002314230604 | 78.8250642061439 |
|       | 51.8824384192988 | 86.3374157614394 | 75.3969721155153 | 68.6047087267554 |
| AIM1L | 50.8826620053386 | 57.6831182451733 | 54.3554233228353 | 43.9798942439645 |
|       | 48.0901896064056 | 41.0057887014368 | 44.0687697278114 | 71.6849360818041 |
|       | 68.3157692917711 | 54.8439819445945 | 59.1002829627368 | 51.3709954257843 |
| AIM2  | 87.6861665523251 | 123.219313750907 | 230.242190204243 | 113.783910320605 |
|       | 46.5557478175976 | 49.3172204533818 | 50.1185085888209 | 44.293922970134  |
|       | 173.343091136741 | 43.781101409552  | 53.3408430956148 | 52.3896785600751 |
| AIP   | 294.443061798191 | 364.337811621248 | 411.047310950296 | 422.702925141293 |
|       | 320.13475752314  | 494.300858189605 | 530.314249832491 | 286.68367978144  |
|       | 285.12034141287  | 511.164722585602 | 487.261132702908 | 330.946598275585 |
| AIPL1 | 43.8582747295766 | 46.4569566520107 | 44.8872784170036 | 46.3203995372658 |
|       | 46.5557478175976 | 41.4508241771315 | 45.4799270968969 | 45.9604707098953 |
|       | 44.2142581488029 | 43.7303813515864 | 46.5308571957384 | 44.3521099857368 |
| AIRE  | 1468.75291542154 | 658.282562295783 | 717.997180920384 | 1221.31634960736 |
|       | 577.993850127555 | 427.972184856393 | 913.704049709264 | 1999.21832626916 |
|       | 561.2769907009   | 1652.85734308754 | 1588.70376317303 | 1180.7204565402  |
| AJAP1 | 36.6002100641539 | 42.9034257147996 | 45.8409758448533 | 43.8524422305633 |
|       | 41.4273122914951 | 41.3553369544097 | 43.6753843488695 | 42.0778399888414 |
|       | 41.7117861328546 | 46.0727230219512 | 42.0424641526302 | 44.9070250604284 |
| AK1   | 86.6655289455628 | 69.5544840164738 | 57.0427273538849 | 63.7909104347097 |
|       | 119.41355955168  | 95.6783002876222 | 67.3976855661302 | 101.39385858723  |
|       | 62.5542376788358 | 71.5948944013406 | 69.0663624160288 | 67.5047089908724 |
| AK2   | 256.55408314817  | 265.790391813663 | 343.990395610093 | 241.51647940043  |
|       | 387.039093527273 | 265.520773157991 | 457.097617649604 | 540.037371261388 |
|       | 506.173054520807 | 304.658728492827 | 297.701126167694 | 361.524083649962 |
| AK3   | 324.936044300546 | 540.721068846198 | 353.531051185171 | 347.003621791919 |
|       | 595.012422454829 | 923.470702344816 | 527.439095170064 | 783.039774594242 |
|       | 342.475405815033 | 1333.01876209753 | 746.252816568691 | 849.412637017524 |

AK3L1 112.146987452306 45.0115870036541 55.9459886217809 98.1701560122734  
48.3814421939888 93.4494731509092 57.3286965007828 46.9354126752815  
94.2987879109502 68.3324949971284 57.6511495792664 102.288104112092  
AK5 45.7071930619474 38.2795150354677 36.8086106563517 40.3180310664156  
40.188873541274 40.6994262313917 43.3744503319109 38.8495095797881  
42.5406888281114 43.1447142498924 42.170702295259 40.9683275553869  
AK7 38.2083710281545 44.0409178714232 37.7384958256497 43.1847628331565  
41.9842695818285 45.1873487463472 43.9450023643394 39.4710743516517  
43.1805016690297 42.4594149893798 38.6662194645633 32.7800533388945  
AKAP1 50.2203578628217 57.1595768494068 50.4662238169527 47.1332119496722  
54.3554233228353 58.4984917725442 63.0842071602791 55.3122077514658  
61.6839343510302 56.4553747079294 61.0979269700412 57.1021912253879  
AKAP10 67.9531693869426 73.9376772899278 88.878414939392  
83.1614238528477 67.1278109419819 76.331185787832 85.8154958329408  
55.1933004802607 65.644767142472 70.0907269565408 76.111908977613  
61.9882398986333  
AKAP11 89.680151549258 91.1363393944977 98.8595497262968  
93.9805435116156 78.4428909886495 102.380096190518 83.014860007187  
76.6868184563568 88.2639730639822 115.643361390258 120.123385036416  
112.17141283151  
AKAP12 43.1993673617091 45.620219291723 44.3648993568405  
48.3749160953344 43.3982712035296 73.1640951333742 46.6267962186599  
57.9713749600418 51.1596992013828 51.7343702554597 53.6578934390465  
58.3164247463092  
AKAP13 173.357715186701 120.679433440203 132.730723037077  
370.64147085217 97.8825824657468 336.679355848349 95.9298109273155  
120.240956797301 104.049367545498 170.015373751824 201.027801320306  
180.902423012987  
AKAP14 43.6706764143908 37.1685072112618 40.301483914446  
37.2575268352423 36.8457174858615 39.5637454855233 40.0557788909923  
39.6910816302609 36.5675023356094 39.6719190054379 37.6908810658759  
36.9976231206067  
AKAP2 45.5342598239058 44.5491926807637 43.3438593008468 49.239733414453  
42.7107928951766 46.8954576545929 44.797320243931 46.4301247577801  
43.2239171482126 44.571915452417 45.5936699846945 42.4322338033273  
AKAP3 52.8427643366617 42.7775752471711 44.7829632472754 60.1837189855762  
51.940083408061 42.8598805316863 44.3440839686558 60.7942162859036  
51.8824384192988 54.3554233228353 53.9517841438975 47.7962548556026  
AKAP4 42.7671420440641 41.554942319225 40.3452320167286 40.9157352260901  
43.7517118200398 42.2189674040934 42.7431359850339 44.6484005362281  
39.044540595942 48.9259041798949 41.1367478979484 43.3276027198418  
AKAP5 35.1307934330047 40.148780650831 32.1218888714537 36.0481934423077  
35.7973685350741 33.6859433472087 43.5627649099623 32.229154316188  
31.2688290305385 38.0078357808393 39.0550139257658 30.6242215267208  
AKAP6 41.3387790895716 38.5252456306656 42.2577689927563 37.651298468202  
42.9090346219023 64.5187138759372 38.4005795891396 48.0582855095143  
37.5469247328848 48.7414853386615 43.0016969050339 40.4639532172338  
AKAP7 46.1513019317765 170.450752247109 83.616030092144 60.2674188885735  
45.9725715538987 64.8903340853337 70.1845639720491 50.4463723277824  
51.4003427453474 92.526038865874 70.4482288143151 70.7987307549177  
AKAP8 145.883224917856 239.117228656704 216.782658096982 172.39907939484  
206.963315276491 178.092166249096 138.748233664345 131.808634405319  
181.340089705052 277.204818876581 204.944787289897 182.31306890697

AKAP8L 228.933483421328 202.325629133577 319.043862813161  
115.63300104804 338.475097952023 161.817972012879 256.941243394182  
271.436000380202 233.468474830926 271.529471399941 384.522115820048  
165.684719727205  
AKAP9 39.9697332660833 41.7614975630362 44.1070537445005 40.3691324547049  
38.9496515344837 39.9397419279057 40.369768755239 40.6171774724171  
42.3138951003676 37.6637152940566 40.723990462047 44.1452943804044  
AKIRIN1 111.760213205992 200.483228109704 216.03402309102  
136.293724800658 222.336600180634 198.979794834746 166.752205770965  
117.074650076861 401.202348352506 77.8620267163666 93.1850674428555  
127.78061946174  
AKIRIN2 226.090904721424 401.202348352506 317.406465928295  
1012.91803181784 178.525751043592 263.21493129287 243.27954361539  
234.495626550751 236.565670642447 165.121380058529 179.974187861013  
255.197732321307  
AKNA 126.404988409795 254.639522735592 154.248946683126 389.583938820073  
108.168107241759 191.141778714144 235.613437037284 134.085457101528  
69.0037087543684 188.236842521312 197.421622315466 136.456679728935  
AKR1A1 767.489657259345 691.94603958547 429.983084929605  
757.833254346899 435.632247999054 410.257694738546 788.232434009173  
687.862452802453 721.266942608349 465.595459259015 354.38923772101  
445.421601813221  
AKR1B1 785.79878416775 320.452418537108 378.795484311455  
814.294297312057 4128.92158369026 1058.61208471961 888.56944380788  
809.577874019028 450.139987981805 471.297503316471 442.711822532078  
638.064750551015  
AKR1B10 79.1369056968656 85.4420599474339 644.733901442573  
40.646702696033 65.3019328668633 316.745819100367 55.4004611309636  
110.191860661108 107.808744445896 128.616776019243 204.944787289897  
110.731862140996  
AKR1C1 34.1336988442837 37.920964499903 33.553634633839  
38.2041059863839 32.9756367838345 35.314469458379 35.9894133432376  
36.1375121409002 41.5635499110307 42.2614524730856 35.9563099719284  
34.4570158133896  
AKR1C2 47.6019996326339 437.84407370064 1726.90584784425  
59.2241547536843 681.474524031866 251.803102904399 377.679662622526  
82.2838944641385 966.803172864162 1120.83891847181 1369.13346566895  
866.712228831149  
AKR1C3 293.649670545233 714.075528895169 2878.82618761804  
214.51120218554 2575.86919902296 818.927157206447 3478.67753301901  
465.430886956232 4617.45430247751 3021.24285327836 2528.6392272518  
3428.74022048394  
AKR1C4 58.1027665533767 364.141443387516 1294.42501356365  
66.1082848714279 750.151825182993 252.583117397109 364.795587956819  
81.2228688683149 789.511653564341 212.353676518748 437.84407370064  
761.341795853104  
AKR1CL1 38.957687788868 40.7952353240579 43.0016969050339  
53.593974682612 44.3557408297309 44.8872784170036 42.357910063876  
42.157627240486 44.619512785899 40.8970401536578 42.4580504587581  
39.6352613956998  
AKR1CL2 40.8681871019812 32.2133093774284 42.4580504587581  
40.3180310664156 41.1868052124344 46.4648868771662 43.0930293831497  
48.6441988290952 44.1519466943185 37.7315666632629 49.3901004211918  
37.9607839934735

AKR1D1 4277.93019582362 1900.96666834569 2374.1766901821  
3124.84336032646 1673.60994518271 1756.86714809925 3001.25236839028  
4015.88651424568 1771.43541011426 3786.90274075023 3726.73487426505  
3070.83113612925  
AKR7A2 295.841196113053 534.881442644054 662.041552795049  
412.880824530845 740.423874031773 790.440637272613 821.013687795434  
651.795139128843 849.412637017524 718.832367050609 586.281182112872  
514.70012608304  
AKR7A3 94.4618437533343 104.409397223301 120.149188463323  
83.1614238528477 97.0813208326187 113.979504140326 122.720768249799  
97.0589984189239 131.330480963914 96.9880759408512 86.1633564934019  
78.2393202422664  
AKT1 766.027617496754 555.044139654886 808.857027942253 440.728435508514  
628.403814060213 603.737787922337 678.684833360104 641.462632112151  
686.154904023493 547.072513229674 562.258108316474 491.468862309918  
AKT1S1 52.109723558511 51.3800036046133 51.223859150798  
48.4916117779992 54.4586176399381 51.702461863489 54.4934782594218  
57.3286965007828 68.75304552302 56.3441077510744 55.6972661824064  
47.9566297250148  
AKT2 41.8409927585705 57.5197017161209 52.1242102345408 43.4410741327254  
60.2886873195135 46.7800033479223 39.5496902678788 43.0390857698452  
52.3579564953125 41.1222709786153 46.8954576545929 42.0424641526302  
AKT3 41.8982199176791 40.5933302721015 39.1480645318984 41.7064916467908  
41.7525817198982 48.3119523820103 41.1886975241176 39.8016018354453  
39.6333888530279 40.3548989788016 41.2226607554583 46.0207973898744  
AKTIP 148.871702513875 164.262531918679 192.112101000423 109.503117647487  
104.599492214295 219.582785177134 199.152637378893 187.656257079035  
177.935411895372 212.436948565474 189.398959817735 198.729330487352  
ALAD 67.6767845246581 61.6878176260761 62.9967097752591 69.4501305462809  
57.4622430729629 87.9871827215149 58.7585623394335 53.0338164320907  
53.6982043633833 72.9051985681184 72.4834467838798 79.0918252621521  
ALAS1 43.2239171482126 58.8281931439093 57.0032851500427 55.7418331108915  
55.421880601441 48.1167207436826 102.063594231253 104.232196493024  
70.0133734659853 51.1621379498014 48.8744644207821 70.25295977615  
ALAS2 42.3433931248155 40.148780650831 44.6484005362281 42.7613994022988  
44.9467652377494 46.4308160577459 53.3932110698117 39.9955307208157  
39.6345710603047 48.1392888470269 42.4098506918871 40.5281496800812  
ALB 42.0833588105728 41.7614975630362 40.244271403831 41.4636047919453  
41.7929491793697 41.9069736908705 43.1602899171656 43.2890595186135  
42.5406888281114 89.8035133597498 43.0016969050339 40.1700117452801  
ALCAM 157.906415100288 116.596605311488 65.8455652907556 215.907790093087  
75.5510570035251 92.47006193987 117.706922397135 137.302487233881  
127.596368103014 172.83517237888 137.484063876244 218.354538624978  
ALDH16A1 87.3342335690393 158.557256842416 122.024487499513  
117.948047796034 220.597255695837 94.6167194649276 124.44575078108  
125.484233748017 216.976116788572 85.6763929745253 114.629316822574  
92.5011103881887  
ALDH18A1 190.053043382767 180.756651647731 143.526781144716  
183.613579501306 226.262409390222 139.883681090758 237.864776225441  
157.082769443568 149.040814842403 150.396608064863 133.401306624347  
182.188883821722  
ALDH1A1 78.5216977073842 59.5534127075228 61.62834757456  
134.519244495139 43.4885245598939 331.390452289344 111.496552406657

73.0394191668858 67.2022549641647 124.738024302128 138.486962379511  
99.7529382840954  
ALDH1A2 54.1437245703767 45.3756389170606 45.7968648044613  
193.395549316561 55.4919197421746 86.4725057696307 220.36831243882  
79.2701322339022 48.8524897151151 98.0967511777819 173.476817564711  
75.5861488664745  
ALDH1A3 118.316810638061 118.49449420132 58.2986825661503  
104.672760332135 207.943044411392 184.898658656843 195.376772135023  
201.941251308732 436.216696884703 229.697141930047 270.303708972854  
393.001025840896  
ALDH1B1 102.443884864631 62.7743500747415 46.7058093820839  
48.055683217958 67.2779942308321 139.121494956408 54.5772630900888  
52.3068458655445 48.8067321016961 84.0691608193405 108.779357041421  
192.398575159246  
ALDH1L1 39.4710743516517 56.6927078228789 973.363245512859  
49.9014504704021 204.370291548631 83.2083460752986 131.097521229971  
145.526972410673 356.318517117856 1117.26060212107 1035.67547271468  
1183.62228577053  
ALDH1L2 50.5252048155459 43.5627649099623 39.7411455670172  
48.9944486068347 38.0598374201407 46.4329203134841 44.3440839686558  
37.33030683349 46.6491671626143 41.3321861371202 39.6833800000587  
40.1700117452801  
ALDH2 89.646647563364 175.28322146764 297.950627905767 536.973599140459  
406.104588997462 618.293140877956 172.285394357607 130.960165577212  
107.808744445896 389.026128346842 382.312820492386 538.716947884528  
ALDH3A1 41.7397731376692 83.4951332849212 448.290058854438  
40.5484717678957 74.8013460023603 46.1513019317765 291.086512261106  
48.4670130605028 173.212430860273 193.951097560903 120.418406532204  
1509.04753111016  
ALDH3A2 136.456679728935 107.264443219718 145.607100979838  
136.461760992832 95.9750691854349 237.039707901886 355.7118155732  
100.289042948128 142.545268664218 238.746837986347 194.536619596804  
309.39599482851  
ALDH3B1 74.6277165793069 58.8281931439093 52.5353664902258  
108.928854330744 49.5666074434383 65.1291617069903 55.5578334877425  
51.8347877274018 73.2607982527105 89.9615463738575 81.1350396749303  
79.5270065657539  
ALDH3B2 268.097966292089 87.7881690937563 103.356071080819  
43.1131704517186 51.7456939295414 43.3356152004262 203.334053441063  
374.026381773215 99.2898960399974 96.4072955983042 84.5753844445856  
58.0852316663986  
ALDH4A1 59.2628513357357 124.646386399592 209.038077542654  
47.8910351649754 135.29225447532 62.8131992098474 221.383645621978  
98.5554785420459 275.549982777518 364.628602969366 388.74199767336  
307.445116836976  
ALDH5A1 105.308648028552 108.27606179864 102.394035383591  
56.4578213622965 422.931891494195 105.267519627444 319.092568066532  
212.062417120966 188.13862794196 184.123415143164 164.96500173066  
168.492959515167  
ALDH6A1 74.3135387703106 63.3948709726117 103.883220270094  
60.2877434874622 90.2652818919579 124.338989399317 91.3992526702001  
93.3718038663074 86.5616422570166 91.7227477250701 111.501058276821  
99.2898960399974

|         |                  |                  |                  |                  |
|---------|------------------|------------------|------------------|------------------|
| ALDH7A1 | 145.561345203804 | 178.4681248137   | 425.776214512634 |                  |
|         | 143.383133346874 | 647.297964303385 | 303.139550962377 | 498.608204176238 |
|         | 104.516141143655 | 43.3262148375525 | 425.522158941437 | 457.502917254598 |
|         | 641.462632112151 |                  |                  |                  |
| ALDH8A1 | 42.7671420440641 | 41.0177881453725 | 40.3452320167286 |                  |
|         | 40.6907735219854 | 44.9936360641969 | 42.8181679217665 | 41.1818632392526 |
|         | 42.3180724671488 | 42.5406888281114 | 43.1839109702714 | 42.6913548400127 |
|         | 43.4709415392696 |                  |                  |                  |
| ALDH9A1 | 1237.93130196998 | 1598.78859278229 | 1969.8871504719  |                  |
|         | 1182.10714525377 | 1914.9556343048  | 1985.3999418878  | 1483.40077183826 |
|         | 1127.96214301065 | 1142.67599037881 | 1886.05449875658 | 2061.66570137425 |
|         | 1473.52943897204 |                  |                  |                  |
| ALDOA   | 1249.41227924272 | 1640.74027400791 | 3099.21690111993 | 1021.71286017481 |
|         | 2002.0536042686  | 1046.42391243532 | 1130.2486883492  | 837.959914510114 |
|         | 1900.96666834569 | 572.667024472672 | 738.059797123491 | 1182.10714525377 |
| ALDOB   | 53.7507429765038 | 52.1062000766427 | 59.2778887402357 | 51.223859150798  |
|         | 49.8304479381623 | 48.4758590019384 | 49.6872467499977 | 67.6082563445866 |
|         | 50.1603795873336 | 63.6197695952215 | 55.4694986901287 | 47.8931773060789 |
| ALDOC   | 341.302185430613 | 206.931452638325 | 411.73316510051  | 247.193935816149 |
|         | 289.05213385509  | 197.569816397993 | 576.367042159347 | 251.33720343548  |
|         | 1125.31394383117 | 226.35806628102  | 174.584330660466 | 248.599530435666 |
| ALG1    | 63.3717459766798 | 74.8071157013401 | 102.500172212095 | 61.2213001749372 |
|         | 96.5030525416431 | 67.9306669919176 | 74.7534423194688 | 52.1788489555942 |
|         | 82.2694707335812 | 52.6879797806876 | 53.4921736109774 | 61.2685222381296 |
| ALG10B  | 46.0920218698606 | 47.7962548556026 | 42.5864346233886 |                  |
|         | 46.3203995372658 | 45.1899271235974 | 41.8613406887824 | 45.8311458106942 |
|         | 43.9604529016594 | 61.1851254827343 | 48.5374448344297 | 44.7114813656401 |
|         | 47.2862299990938 |                  |                  |                  |
| ALG11   | 46.8141313516997 | 50.0425298550559 | 62.8362064074814 | 60.7148442408147 |
|         | 57.6791750431251 | 51.9421032049606 | 44.2753808209563 | 47.6388115824631 |
|         | 49.6078549993388 | 41.1222709786153 | 52.104880481326  | 51.7833333848627 |
| ALG12   | 49.4151347850687 | 56.3560498705517 | 59.1040441894478 | 51.223859150798  |
|         | 58.5450868286167 | 51.1621379498014 | 47.4439407315335 | 60.2691630545162 |
|         | 64.3425836997629 | 61.6670071424359 | 55.3942006156899 | 49.9692385479389 |
| ALG13   | 79.3539393480885 | 117.071280682786 | 106.679905803492 | 121.281573820819 |
|         | 152.187430924861 | 108.04376659067  | 113.866742186841 | 91.5258329186709 |
|         | 136.004535901075 | 69.805066579191  | 67.3269632644926 | 115.283739065312 |
| ALG14   | 74.4062547641529 | 65.1291617069903 | 63.0670482657086 | 65.084620579901  |
|         | 65.3019328668633 | 65.6382617782876 | 76.9234119135629 | 55.2412344988347 |
|         | 91.6978282652998 | 55.3153799233744 | 65.4137646609535 | 64.1080166181228 |
| ALG2    | 51.413025495745  | 56.1355483199198 | 49.8344973836834 | 52.5307002738469 |
|         | 59.0965219753805 | 50.6915708372926 | 56.4809146784765 | 53.0409330844067 |
|         | 48.9482359914659 | 51.4454142248566 | 46.29198852834   | 47.3992733452821 |
| ALG3    | 126.775432305478 | 119.647202975116 | 161.205086002542 | 127.148417780972 |
|         | 245.853111206859 | 112.340869310085 | 146.840603547323 | 127.051878502711 |
|         | 163.766548456924 | 138.027432399991 | 120.679433440203 | 120.571680725698 |
| ALG5    | 175.271140689255 | 262.579533452771 | 227.439319520245 | 306.578554914328 |
|         | 163.809567262808 | 213.799316520531 | 246.09270373893  | 161.563526062761 |
|         | 348.206465194205 | 221.015209694864 | 211.701234819986 | 214.537530518962 |
| ALG6    | 224.976641879383 | 145.193498675059 | 163.028918580618 | 130.515102593803 |
|         | 167.746168796779 | 85.8059456975413 | 120.231435193839 | 155.099281008688 |
|         | 363.602775933416 | 128.749209040345 | 118.57174795047  | 152.36389833079  |



ALG8 136.155022329495 109.714619050525 192.922622120507 131.068763088422  
 192.509049577236 113.518333340953 146.299417934358 182.601427407211  
 188.457593309678 136.998739859195 149.832238573027 161.817972012879  
 ALG9 106.219480656782 106.8866235778 148.582198572949 83.5895816521251  
 114.611557317665 167.760135663101 92.0880591999243 93.7090094630558  
 161.326580647514 124.44575078108 118.720812623965 191.896416838806  
 ALK 45.9090659324223 44.5884811528117 44.3344900481112 48.4916117779992  
 42.3685136297603 43.4681646416585 41.4742337714895 47.0940613507321  
 44.2607789091176 41.2276963324981 49.6706535876636 42.357910063876  
 ALKBH1 69.5766550328677 59.9174456081704 69.11736279512  
 74.8071157013401 74.2769881586739 67.4018925617901 60.3928833351886  
 50.4511067853644 72.828269171954 61.5635554619635 68.0751111916102  
 71.4197504261453  
 ALKBH2 170.850089909832 136.67168846573 205.789533350801  
 99.2432911346944 532.196768917735 246.500690127803 361.524083649962  
 163.827112371305 201.875082892488 207.600413958886 199.937572174194  
 134.185571685143  
 ALKBH3 158.702003835578 225.654863797316 172.479002170227  
 228.615793354146 175.018819532801 165.322633260592 138.82907142482  
 156.844010597219 182.836805462079 227.817928402227 229.188779190649  
 161.739131587013  
 ALKBH4 73.8374823243007 52.502055890816 71.8706847571669  
 44.550322123994 73.9456720099807 52.1024135605001 55.4004611309636  
 50.7364620410977 85.5095013644374 67.6983931011126 69.1414574152997  
 54.5921287593554  
 ALKBH5 1573.61108703981 1591.51486001004 1611.35913846618  
 1478.26733379357 1969.8871504719 2191.09005731751 1354.50256889331  
 1149.90692951795 1762.93413846062 1783.87583818834 2054.64068255575  
 1573.61108703981  
 ALKBH6 88.0979122006842 127.437627356956 153.711194034581  
 95.9391851122771 200.698372627272 92.9820860411485 173.536155357688  
 125.786923817078 121.562769658314 96.0236731791095 135.92805172353  
 102.163854544231  
 ALKBH7 145.694779669933 169.970634268117 214.774035015293  
 203.559653641339 321.686871145301 213.981743647681 156.56745342836  
 99.2432911346944 218.013913036142 174.469283513638 159.268245287939  
 152.272399644814  
 ALKBH8 41.8409927585705 51.7495306734657 45.1569741609597  
 46.1673159982664 61.1216330559316 53.0290605707162 48.6395795163502  
 46.4672637826582 45.1899271235974 49.9493230064613 55.3942006156899  
 46.7182294568603  
 ALLC 39.8184668132023 40.6380495994768 43.0697338561114 42.5054997771887  
 40.4261913313642 39.8873706855774 41.8695090436685 41.3506832276112  
 40.8351751854504 39.0325254636537 40.0436653463863 36.7762265039864  
 ALMS1 76.6868184563568 101.699631771662 72.0243286940589 70.506090074243  
 81.7765447802116 96.143327683221 134.271727318694 127.596368103014  
 86.2563919366781 86.2118355769367 101.187156681366 62.3470274683312  
 ALOX12 40.2543341073001 140.369714831352 43.5710871617107  
 45.334106390212 149.792346524401 46.7800033479223 140.41738844565  
 81.1284422173774 43.7630587657205 37.5343260962758 42.2618615571566  
 42.9887069977696  
 ALOX12B 45.3872406432794 40.6380495994768 34.806104801006  
 42.2496337895968 40.2449343247539 37.8102105794655 42.4939802311136

43.3262148375525 47.27543600687 44.8997235283254 45.7328341667151  
43.5738557773903  
ALOX12P2 45.0985088502363 48.5905518770847 55.3122077514658  
47.2740099216972 70.506090074243 42.157627240486 41.3094485574845  
43.7396619462033 54.9426456410692 53.1309801459151 50.4009921377716  
45.3763275588341  
ALOX15 42.3620028137457 42.1218529375265 38.9790184198145  
40.7481155008596 46.0566822875389 44.7804080899431 48.2768592317085  
43.6753843488695 44.0141223586787 41.6373771565199 40.8681871019812  
41.5961238651523  
ALOX15B 42.668311948721 39.7509165247419 49.0629169775674  
56.7351380543324 39.7568367479301 44.0804700754786 39.721757876562  
38.956280281655 40.7847110517594 46.7646877499666 41.4784106456949  
43.5367669381526  
ALOX5 288.065258507995 557.455966274117 442.080188140864 833.136660528149  
203.651890041185 207.087723777954 626.390544175817 313.660064080622  
212.622278823808 588.247843264181 770.715044136717 645.408557927175  
ALOX5AP 505.018127833201 233.850715388018 311.901423694475  
5895.03230740197 133.541341560868 651.621028098039 589.912813291296  
156.844010597219 96.1710806345503 195.543760781509 211.451463038315  
433.447319956981  
ALOXE3 40.148780650831 45.4143854024453 46.3411353377615  
36.0481934423077 38.8456942580061 39.8455060654531 37.830876898596  
63.0748373122119 33.4698406117406 44.4652605017595 43.3085358214154  
40.7704587752083  
ALPI 41.4508241771315 46.6996902348633 35.8265993915844 44.550322123994  
46.4343327861696 43.9724628401189 40.5585676679482 44.4031868028216  
44.3440839686558 45.4614234442527 43.401782064778 42.57175366709  
ALPK1 127.072685504735 125.154933118907 140.030757545662 241.384699095468  
110.009834478125 116.35075921851 106.317388820963 88.1861828863404  
109.654559065946 178.219279777774 116.793627324217 170.327588764719  
ALPK2 102.25509551881 53.4735821194294 42.0621425894624 81.6780581904253  
48.8381507187986 42.750861693377 56.2181240696479 51.9447450229707  
43.2761454096265 34.4875013487777 40.4504608195666 40.4639532172338  
ALPK3 44.436995101921 40.6380495994768 38.7745734037492 43.4410741327254  
46.6397391251762 41.4508241771315 35.8227939208521 41.8417024632349  
36.0741672064298 45.9004543328976 45.5707650534259 39.6352613956998  
ALPL 69.1641374421455 126.14245679817 129.810477623628 708.005870621064  
130.293915348934 100.017263238916 253.237824005249 85.6673237797982  
63.1944558106132 60.8730416435467 122.15017220566 66.2305843819029  
ALPP 2018.28984520892 825.558929673308 1260.45604038487 1554.42895572029  
767.921811623919 621.012072500314 1521.20630233299 2844.5506310828  
712.80113322987 2456.86796652313 2306.14613042834 1526.94101719128  
ALPPL2 61.2130609867477 46.1569135229922 40.8420925848403  
51.5913529948887 46.0043807840705 49.7458652239071 46.5650556481721  
45.2806199505029 40.9901805728485 41.4397539024976 43.4709415392696  
43.9541718254769  
ALS2 188.272588632909 151.686513723244 147.34358398245 133.365282773876  
187.21383075601 156.259762538052 128.966814822678 146.719419166639  
145.607100979838 168.522052983892 135.308001652191 141.255712367708  
ALS2CL 44.7915315085948 51.9601694822199 73.3881007284998  
40.7941759414114 49.1928206164702 41.9097689475185 46.9929836306816  
43.781101409552 45.7226406704445 59.4309046716701 54.7883681830995  
64.7703246910536

ALS2CR11 40.8681871019812 38.4330755397458 40.301483914446  
43.074472921841 46.5557478175976 39.4953494583071 45.6042625176633  
48.4670130605028 46.6944238390932 40.3235655331796 40.9157352260901  
43.9541718254769  
ALS2CR12 37.6397652536077 35.6434124419782 37.6557714476853  
32.2212308728305 31.4686555405126 35.9305494063137 33.1392460259336  
43.844855336215 33.9456837661864 37.0320432433314 40.723990462047  
35.3525469364579  
ALS2CR13 265.320447667174 240.934550408797 206.559526386642  
175.271140689255 262.215263489321 142.03031230486 231.060688044554  
412.162238678684 318.920760335454 551.304967553891 498.958550919515  
450.759762047652  
ALS2CR14 134.113913870501 83.1308709614708 92.1646038105091  
143.822560762049 78.5141640924736 76.5888466260562 111.025105784166  
227.642500471069 74.1282220615085 149.27230040094 121.729442469889  
106.912316023598  
ALS2CR16 46.441301934328 46.0713306971594 52.0742951366864  
39.1706564265495 44.5668141895992 44.2607789091176 46.8613212048981  
41.1575777497576 43.0930293831497 59.8130420783374 49.5923712603197  
46.5650556481721  
ALS2CR4 186.522518256229 178.675242612997 235.925374041038  
86.1703662107384 367.081499539744 154.355197155161 200.002687565519  
256.843419520398 249.729778471447 117.293778127059 128.873145026756  
153.940127525369  
ALS2CR8 45.3872406432794 46.8954576545929 55.094385444315  
47.8164193292842 43.4544762830742 44.2607789091176 43.8206425661746  
46.0633179231318 47.7086093893038 46.5650556481721 38.3684202018524  
45.3763275588341  
ALX3 41.2424637338424 43.2649781354792 41.8389336728199 39.9084621723809  
41.2740822675592 39.7394181011603 41.8799523546812 38.5457716679071  
38.2215591930186 37.3179578037963 36.1812049498986 40.2237056928605  
ALX4 37.4554876386402 42.7775752471711 36.8730514568925 35.3829784221072  
36.6354013629791 32.2133093774284 38.2933870238743 35.3608605269276  
40.0403898620771 43.2988017098387 34.9428206949566 37.9607839934735  
AMAC1 38.8561375693335 43.1805016690297 37.9482157381008 41.0726336841311  
37.3508690072156 40.1428591998404 36.8369172900902 39.9576138799997  
36.0741672064298 45.0155543555707 35.6041926503637 39.7411455670172  
AMAC1L1 35.8208542506595 40.7952353240579 40.7620472083159  
49.7350276169552 44.147557390293 42.9695585740813 46.4388841354122  
43.6434576713809 45.0017158586743 41.1222709786153 39.3667161654772  
41.3481355128089  
AMAC1L2 39.5068753428772 40.3180310664156 40.9861485852278  
43.1131704517186 39.5317722761104 45.8325181856483 42.1607322031054  
43.844855336215 43.2100129360085 42.4594149893798 40.1742127891824  
44.1211971585961  
AMACR 61.356483470053 135.19133529995 75.9768176242642 47.0033848638449  
83.5069968129733 77.7481370715949 148.570371099987 189.650905999631  
95.1224420992193 51.909968572392 57.2008272301399 61.0025829061063  
AMBN 39.8334299607129 41.9390340055841 43.7630587657205 45.4912838971528  
39.5357194705749 44.0430338499507 42.7431359850339 41.1975417470633  
44.9645354363967 41.5852317867787 38.2293008890613 41.5262906399874  
AMBP 49.085741080241 35.5310164682026 45.3974838013476 39.9697332660833  
41.5668884168669 41.4508241771315 43.9450023643394 43.2551508830106  
45.2897806651929 46.5650556481721 44.7114813656401 45.5800840647989

AMBRA1 42.3433931248155 44.5884811528117 40.6737160001291  
45.5869891570251 43.1252272136667 38.5252456306656 39.6535880152834  
43.1567024035183 48.2123120250343 49.9493230064613 43.0016969050339  
50.8999542937724  
AMD1 398.43592055172 176.963666283432 203.178221073902 220.454785391748  
246.725921565571 325.275883498219 176.839214683647 487.065758294354  
160.100408020768 123.918925337643 143.693373312575 209.497482517298  
AMDHD1 41.8409927585705 44.5152708955623 40.5734458834617  
65.7321440516177 43.844855336215 43.7630587657205 47.7390230243778  
51.3472428383325 44.4395580493118 44.3648993568405 42.5426057453993  
43.8575940017119  
AMDHD2 165.606015336587 114.965999573704 114.84900130932  
298.924873508403 90.385018479478 155.270252661048 175.165302282522  
249.195312452368 82.1974756449763 83.0700092537618 109.076358658606  
59.3082373468217  
AMELX 39.8662795144616 40.2493681589104 34.5718473203083 41.5464765641928  
42.7982502551634 39.2985791324641 40.3302268293707 44.797320243931  
41.074824727477 40.6022003765153 47.8284278211109 41.863927676552  
AMELY 39.0620487644635 46.8954576545929 40.931294690669 41.7614975630362  
45.2556760873335 41.6590564937735 40.7910160811527 45.1714698794331  
47.3791873993182 41.7405682794166 44.0409178714232 48.6037684272115  
AMFR 172.990533342251 111.492046718579 149.330073823683 74.9236800269025  
147.017279035061 151.641746442323 112.362505628749 105.965906809429  
83.105117076029 106.486195938039 62.3990310986805 119.243515595981  
AMH 69.3418521417182 40.2493681589104 41.528370959196 38.4208429103799  
51.940083408061 42.0574848021044 76.0041771381018 59.5830868881343  
127.82585786161 42.6793753550854 38.5668610487033 39.7411455670172  
AMHR2 40.5654775358427 40.5400384479766 44.2405728317107 43.6726153508978  
45.4751076037511 57.8005007012205 38.2933870238743 41.4508241771315  
37.1820543575123 48.7414853386615 46.6442692119997 36.064718696392  
AMICA1 94.8260360398356 160.973602503707 117.689172019617  
940.781370938596 92.3034609409756 120.123385036416 144.227861902786  
95.2292899846287 54.5952754712007 95.0026207727863 104.626873082138  
81.6458112867541  
AMIGO1 38.6454098044474 33.3069622728735 39.3709357615493  
37.0732977341185 43.844855336215 49.2050538150106 48.1747307200218  
39.853866204927 40.6957787921451 45.5776159432079 39.7342718293432  
43.7672102682067  
AMIGO2 42.9104454767916 49.4982025424177 45.989212296035  
66.0397471691747 42.7107928951766 41.159706131351 52.2476631126873  
46.3685439301234 44.8003345643334 42.3606390470387 46.0095710163378  
46.5650556481721  
AMIGO3 43.844855336215 46.8954576545929 44.9758339877851  
51.5913529948887 43.7517118200398 46.0364000143537 46.1634822993009  
39.3709357615493 48.8067321016961 43.844855336215 46.2560238004757  
49.1200355938198  
AMMECR1 56.0787402018234 83.2873728545705 94.9785931907153  
46.0860140689254 108.063001800611 66.2167164788023 73.0433648756396  
96.6485200415333 136.766779297051 62.3470274683312 63.3872214856708  
76.0240426902567  
AMMECR1L 113.298540312696 93.3718038663074 77.0301627655229  
72.6824533717231 87.8170592981737 74.0995052892511 63.2726414544553  
101.39385858723 77.6496445815897 106.641283957692 87.4273245333478  
93.1067450332473

|        |                  |                  |                  |                  |
|--------|------------------|------------------|------------------|------------------|
| AMN    | 45.6517320730042 | 38.7344853699576 | 50.0748292497578 | 38.3166554965434 |
|        | 39.5595233162192 | 46.574682061365  | 42.357910063876  | 42.7431359850339 |
|        | 41.3803269429468 | 46.325232414659  | 41.3553369544097 | 40.0557788909923 |
| AMN1   | 51.1740855632044 | 48.109747794187  | 37.3687900733549 | 41.1886975241176 |
|        | 39.1650142708257 | 46.3715909653832 | 44.2166118829877 | 37.6557714476853 |
|        | 41.1742244762318 | 44.2580151149956 | 55.6972661824064 | 48.6037684272115 |
| AMOT   | 72.4966502412724 | 51.6869155634183 | 42.3536549114165 | 48.856176220627  |
|        | 55.9283039581662 | 135.361059757705 | 98.0023132593711 | 104.089998273812 |
|        | 77.9978216366573 | 103.264100180823 | 78.6402083787251 | 73.408861359425  |
| AMOTL1 | 45.9090659324223 | 51.6869155634183 | 48.0191002461099 |                  |
|        | 55.8709511400674 | 50.7615314686244 | 51.9421032049606 | 49.2546642180676 |
|        | 48.4670130605028 | 49.1940901905636 | 59.8130420783374 | 46.2560238004757 |
|        | 49.8253396161069 |                  |                  |                  |
| AMOTL2 | 33.5994525227062 | 36.89524015739   | 40.301483914446  |                  |
|        | 38.5252456306656 | 43.004943518025  | 40.9506062495231 | 34.4570158133896 |
|        | 45.8669209716694 | 34.3842972343227 | 40.5090849993014 | 32.6463318577756 |
|        | 42.7782216342806 |                  |                  |                  |
| AMPD1  | 36.9060997041453 | 45.3486182278177 | 37.7384958256497 | 87.9098670472958 |
|        | 38.745552403895  | 37.7000400506818 | 37.7136011474903 | 42.357910063876  |
|        | 37.1820543575123 | 41.3321861371202 | 40.547835538778  | 40.2669497398702 |
| AMPD2  | 39.6609238036815 | 39.7509165247419 | 39.3344387353654 | 39.4469765850607 |
|        | 36.6354013629791 | 38.0698669928229 | 40.6750540874299 | 36.5919488248006 |
|        | 35.9083761938612 | 35.3362091871364 | 37.6122808321894 | 37.3600014814388 |
| AMPD3  | 42.2455707947223 | 42.6471103236957 | 45.0985088502363 | 53.290742997456  |
|        | 41.3755760434934 | 40.5703581862752 | 42.9214252283214 | 40.6171774724171 |
|        | 44.3780249232864 | 45.0885830154678 | 44.1148826235374 | 45.7958263385498 |
| AMPH   | 61.5112659162073 | 44.2630383225933 | 42.108130037421  | 51.949834638817  |
|        | 73.1215732923523 | 61.8571521441451 | 45.4799270968969 | 46.0106098064475 |
|        | 46.6491671626143 | 49.3000844711116 | 49.0361180089431 | 54.0733528420802 |
| AMT    | 58.1868359012515 | 227.206974078547 | 343.591727067749 | 71.7167037224069 |
|        | 241.202687910704 | 102.163854544231 | 183.584085676174 | 87.9468208580228 |
|        | 66.2552876795581 | 273.349866592589 | 178.012676342712 | 177.088290547513 |
| AMTN   | 40.5654775358427 | 39.8695929627783 | 36.2683886571585 | 36.890925044696  |
|        | 38.2496050953547 | 38.1169703906207 | 39.4600924554505 | 36.43924066428   |
|        | 36.0741672064298 | 38.1042454705119 | 39.9899430628542 | 37.4554876386402 |
| AMY1A  | 65.5495324730507 | 96.3918711895208 | 67.3469281984384 | 67.2968280876013 |
|        | 87.4623442823265 | 54.9460876400605 | 88.2201332015312 | 86.5316479840325 |
|        | 84.7503257101143 | 55.7930787690756 | 59.9876575158981 | 56.6146179789815 |
| AMY1B  | 55.0823430906161 | 57.5197017161209 | 58.4137028673494 | 56.0794100106654 |
|        | 63.7818442618767 | 47.1389972732223 | 58.7239345900248 | 61.8665316900291 |
|        | 56.9733113918431 | 51.0506441018166 | 49.1653186595732 | 47.6040671292013 |
| AMY1C  | 1928.53890809223 | 4344.25847766877 | 2951.88559311416 | 2306.14613042834 |
|        | 3854.42494497831 | 1981.03929621057 | 3296.66056024983 | 3421.24021192326 |
|        | 3653.59181300011 | 2237.08790397818 | 2337.7738990994  | 2164.51925341969 |
| AMY2A  | 43.2135791259317 | 38.8336427948187 | 39.6080759138364 | 41.1426570149164 |
|        | 39.118426249677  | 45.7812172258509 | 42.6913548400127 | 43.6753843488695 |
|        | 38.1725197931105 | 55.5588970907417 | 53.1221282279739 | 46.9939712192224 |
| AMY2B  | 44.1294459089314 | 44.8529259387308 | 42.4890076400051 | 43.6726153508978 |
|        | 44.3166120733789 | 47.9077889806053 | 42.0605906240248 | 42.3110002461296 |
|        | 39.6413313949444 | 47.9056710878325 | 50.8373208590626 | 46.6397391251762 |
| AMZ1   | 42.2455707947223 | 37.7384958256497 | 42.9104454767916 | 42.2496337895968 |
|        | 46.1804647841331 | 40.9506062495231 | 41.9393838138203 | 38.5457716679071 |
|        | 44.5303781239209 | 47.7180816682562 | 40.723990462047  | 47.3172462673426 |

AMZ2 266.717224821545 325.909358171616 421.611594456877 299.524171071613  
331.001195453225 350.584135047249 303.93332785291 294.048088688381  
384.727543700024 281.906398109158 268.265540230814 384.280434953152  
ANAPC1 104.642326714249 135.344261822716 117.732966326465  
83.014860007187 209.138751343454 115.954295099681 115.016486106706  
154.551927302005 126.319731178054 116.817127851913 123.658435242998  
106.641283957692  
ANAPC10 88.8760662992208 124.324905704041 112.865496075486  
127.596368103014 145.193498675059 131.727983826985 111.202737864873  
98.8478655411492 148.016994658777 107.906865732219 93.5045354990096  
143.053774297331  
ANAPC11 122.904323796484 101.987604729928 104.773064067069  
110.757899996422 149.27230040094 107.087870999702 176.991120397205  
137.831070407907 168.58183910352 95.8075612515186 99.9752275166514  
101.857595722021  
ANAPC13 504.281506941044 779.996851709716 560.878675769733  
605.338871441599 1260.45604038487 802.036670929858 413.067407579649  
381.198152331624 450.139987981805 539.471011648536 562.531738167208  
1018.35211991691  
ANAPC2 50.0802438185974 55.8046062733709 47.7737810047679  
44.0451487108213 56.432280646473 49.2871583830897 54.339958888486  
46.2286164776607 54.7033747046992 55.1804535845496 57.9864701726379  
46.8840006833906  
ANAPC4 214.586915093492 216.063990451376 281.774690337889  
260.581111456578 219.555240189863 226.235985918654 267.107863045114  
262.624624672404 245.853111206859 525.16535463798 344.133384411423  
435.325038193179  
ANAPC5 687.011162822211 831.578043520215 864.302844775203  
613.740813446728 708.005870621064 539.471011648536 683.099079617304  
557.094756796515 860.265067346622 635.906934423716 642.946369683508  
530.314249832491  
ANAPC7 77.1900613562529 107.836867810972 107.413918714848  
56.0794100106654 110.411217828763 106.590506599473 83.5149142053137  
56.2441895183416 110.312681023811 55.6865353018811 58.6464918752765  
65.6213260281822  
ANG 159.306689057291 56.8017497008794 57.0775902639215 161.65846687852  
50.0580547772867 273.593213694396 77.9493708990494 99.5958921252583  
47.945438269111 263.636675573982 214.281036491237 242.966185793816  
ANGEL1 123.963659641243 88.3636380348802 72.9051985681184  
88.5511408870489 116.099186392258 83.0554837248934 83.6935756500468  
90.6347108049639 65.644767142472 86.500678864429 79.5743379965984  
81.1189042503645  
ANGEL2 254.756894822368 276.633536223159 459.737628144571  
222.985386635178 204.490115029568 269.681925095165 263.706801812277  
235.169335305672 224.450710664296 396.167219131922 275.673080691335  
196.623560874725  
ANGPT1 66.1650385535549 49.2934904960601 49.1589534780597  
43.2551508830106 53.1884505015411 98.0473811574767 44.7255207589606  
61.2343203799193 75.891637602914 64.6835308827804 56.3884556031093  
55.2886892579203  
ANGPT2 271.601892365742 221.450737998571 589.685739519627  
93.7782490229256 220.167309646966 144.17470770145 82.2650787041549  
81.6529991377083 95.5920087912438 50.7855742231932 63.1566669782858  
87.2175634803271

ANGPT4 41.4508241771315 42.5269793679335 37.6557714476853  
38.3166554965434 38.4540849632254 36.8059561571675 44.4639405506967  
38.4540849632254 40.0403898620771 39.6719190054379 44.4688999098904  
35.9604262434141

ANGPTL1 41.187562301961 42.2900457798748 40.301483914446  
38.6835649080278 39.3667161654772 49.2871583830897 40.369768755239  
40.0965255448873 40.7460990419215 44.0719548209593 40.3452320167286  
48.6447083765118

ANGPTL2 514.261598258395 94.2182728193924 197.608255265624  
196.760671234837 118.10944558223 439.558287621096 91.983638239817  
125.013317684129 46.3203995372658 171.043935516593 211.829374574045  
252.712633314274

ANGPTL3 35.4287975493553 37.958111840848 39.1480645318984  
39.9697332660833 41.7419877611072 39.8785903668981 41.5464765641928  
40.9861485852278 38.2215591930186 39.3113207075992 36.8282383070068  
41.9741368971524

ANGPTL4 52.6960621424156 51.8315727494672 203.010958724293  
71.5249259772583 66.224559122062 66.9340967279385 52.761508834671  
70.7238101239421 227.791956085471 54.8439819445945 62.0404348860702  
200.615897175992

ANGPTL5 36.1232327599945 39.5050383901884 35.2101597814352  
39.3750969348308 41.467005949568 80.0243450227647 42.0605906240248  
39.7509165247419 38.9006788676407 46.2286164776607 47.7535797917441  
42.2577689927563

ANGPTL6 43.2724556187214 45.2556760873335 38.6727842796202  
46.0228732507872 46.9906120932727 45.1873487463472 42.0605906240248  
51.2623287419357 40.5912213523345 44.571915452417 46.0095710163378  
42.2577689927563

ANGPTL7 41.2424637338424 37.1685072112618 38.5045333213784  
39.7411455670172 41.467005949568 53.7442594289333 34.5633623842083  
36.5393857306744 38.7298222155532 50.6486940895674 44.7114813656401  
41.863927676552

ANK1 41.6354649482853 55.0009147092272 43.4709415392696 39.9084621723809  
40.6723334103791 38.9378717994178 37.2892641289258 42.9887069977696  
45.5779686360641 41.0057887014368 40.1362682639916 41.9083581529276

ANK2 41.5421429082231 36.7976562409506 38.2280071951674 40.591923288644  
39.7210115145672 59.0162231611996 38.941855825269 42.1860813954352  
42.0126083977597 41.7405682794166 42.5023941254529 40.2237056928605

ANK3 50.0697497247754 47.0967801720364 51.4308501933893 40.0698728584484  
51.0683600511812 45.338588656043 41.706879587091 52.9813204449021  
61.4329643389309 42.9866214102525 50.4022543872993 48.9892593408116

ANKAR 40.8091178323174 43.0227387991135 47.7052132264218 37.3600014814388  
40.7779767565889 45.3233134695905 39.2533668167483 42.2577689927563  
39.5806465938526 61.7502624458447 48.7502645382856 45.4799270968969

ANKDD1A 80.6434122355417 106.398825125486 111.880226272362  
126.14245679817 132.81898450496 203.178221073902 113.322929203297  
114.533239859288 155.617122020913 521.029507993615 344.314901683001  
431.353025968649

ANKFN1 32.6285977114039 33.3069622728735 40.301483914446  
38.5252456306656 39.3667161654772 32.3796054199032 35.8227939208521  
44.4031868028216 35.6139301508335 34.1648535095605 33.1645364749371  
39.7411455670172

ANKFY1 98.7215951303498 88.3636380348802 97.1884078242617  
77.6056319020116 74.4722810710524 83.1392079778036 84.7782034884529

66.5774376622485 74.1282220615085 115.342852277396 116.253417059012  
105.34055372228  
ANKH 49.2091117967683 43.7410507935043 41.3366779545815 38.9074189954657  
34.0927410219282 44.6524308640784 38.2933870238743 38.8159908342801  
40.1738310955128 40.1613888954735 43.5258090162298 37.7315666632629  
ANKHD1 80.1549028765037 79.8701900696361 76.5053813427296  
92.0269919454947 87.6178717341967 96.7799695976296 71.8466937395628  
74.8377761440265 69.3645322033576 72.0443425395404 70.7045582269595  
72.909783842776  
ANKHD1-EIF4EBP3 56.921728372453 64.9959712888709 69.9179689232341  
49.9014504704021 37.8679241954337 52.5330333302271 59.6780848951767  
73.9624143741222 82.4467808843629 84.7642634532073 71.6502000742477  
68.9258122619781  
ANKK1 36.2496364442264 53.4735821194294 41.2365089689635 37.1894304543751  
37.4470183315826 34.3887641786747 48.4859552186772 38.2782436497441  
33.1602385985469 51.5855515705917 42.357910063876 39.1553169409075  
ANKMY1 63.1291723738553 73.3395284923099 73.4122412764173  
49.9506025936211 49.3970231087231 46.7442228855095 51.5338331947847  
85.9970657980042 71.9771425105735 79.262977183608 76.2876332597671  
61.6702707724448  
ANKMY2 152.585423208022 168.78407943637 178.738800467958  
106.8866235778 167.319747725488 183.584085676174 209.467874193952  
187.711309781257 178.4681248137 240.217589414972 175.009248614892  
252.134800295199  
ANKRA2 116.685453817071 221.22852405053 250.585851778133  
131.955454394903 149.24022100428 144.046404221564 115.314880288079  
114.113460279317 164.343309332109 299.74710723735 213.118335449552  
237.100802227545  
ANKRD1 38.304249186058 35.9305494063137 41.0356368374708  
43.5627649099623 37.6527901109005 36.9060997041453 38.0598374201407  
40.4359177791566 39.853866204927 38.2069499294002 41.7272875295469  
58.2251348002272  
ANKRD10 224.030034866938 195.108184885541 149.09682467711  
143.399636653204 166.064317271991 155.123252685926 97.7620313090597  
142.545268664218 128.126336084436 139.543015878846 140.976643799742  
133.244526666651  
ANKRD11 157.493875535302 212.622278823808 226.672191323896  
155.287591646469 209.860757709908 145.170590045628 207.632489510045  
105.220978559157 195.635797217403 122.419178597878 150.925721934159  
177.958475301951  
ANKRD12 143.265312025262 133.558028920419 129.091447141381  
235.544416908354 111.357508398822 186.818097299665 134.713725350463  
128.827672077002 155.148913816397 174.860894067053 173.819948756127  
161.38599012777  
ANKRD13A 401.347734852083 265.367588517131 196.760671234837  
353.213447404132 218.245471601353 445.016226732679 425.174170332175  
230.879083362388 237.401487995882 347.908556198025 295.014183084118  
296.664472126617  
ANKRD13B 44.436995101921 47.5647821785529 43.9450023643394  
41.1886975241176 50.3713170502557 48.8744644207821 47.8947595316832  
60.9009676344258 49.0986627051784 60.0372015630618 47.3791873993182  
41.9430737035925  
ANKRD13C 94.8260360398356 88.6663961027926 74.2769881586739  
77.4676205299631 76.301438841111 87.0685571351947 80.7563265626648



69.4677195088043 61.3733228199803 66.274247400793 75.0704619826557  
85.0113628886031  
ANKRD13D 47.3289285415289 61.9036392303558 63.5738862549306  
44.6905691366696 54.6111272572767 43.9724628401189 54.8860931820001  
60.5571721986885 47.2134341420411 56.6135586098886 58.4139484810943  
52.8144580580955  
ANKRD16 74.9179396623258 73.5743059777365 55.3812135024656  
62.6048727240291 110.125787064192 63.8740412329753 95.8002081462966  
69.6693950681855 93.9387650094061 58.2297667026887 64.863894209343  
56.0477607422828  
ANKRD17 101.144615206297 95.614885914917 96.8945937999801  
98.7215951303498 88.5140510969737 97.4967204298499 85.7013212907541  
77.3640580819535 95.4942268742467 86.9626166234066 86.9329220905001  
117.228320608065  
ANKRD19 38.7537364570873 52.5380506348717 41.0356368374708  
39.1706564265495 221.22852405053 45.7300501624017 59.1774824918359  
49.7309743973184 39.5806465938526 47.4767851750188 40.1742127891824  
42.6758568421347  
ANKRD2 37.7384958256497 43.5873188565519 43.3085358214154  
42.8235313007746 40.148780650831 43.2805590023412 44.2166118829877  
44.8997235283254 42.2577689927563 40.2112371512838 41.7272875295469  
39.7411455670172  
ANKRD20A1 44.9370339275041 73.7133884699889 66.1185883826035  
63.3612993417558 43.7517118200398 50.5148383400703 45.5629520869561  
47.3102170376006 50.378948785456 117.835389983392 91.2769094348604  
93.1668080716761  
ANKRD20A3 39.7320564340365 39.5573415356949 38.741573807882  
39.853175885492 43.2484996523549 35.1307934330047 40.968974769473  
33.7279747699292 41.3468610075772 37.4642807402741 36.7892997857376  
41.1868052124344  
ANKRD20B 37.3463875295726 36.6968906669565 36.8196632231462  
37.361552364697 35.5942749164671 37.6484782516569 39.9397419279057  
39.5173442227948 36.4476883897928 39.3698811593364 38.8034431562381  
37.7357214460683  
ANKRD21 35.1307934330047 37.10170285405 41.0356368374708  
41.5464765641928 38.5512429290626 39.7394181011603 41.1507980856436  
34.6977013306396 41.3803269429468 39.8873706855774 38.956280281655  
37.2810767789306  
ANKRD22 116.852483297949 128.952325188088 81.2359429678503  
168.798543634965 56.1186281675573 51.1081003576577 73.9192243586276  
64.4156641487994 103.577201248705 149.386774957393 163.585662735512  
164.435300801872  
ANKRD23 44.9896851005259 48.0296332183129 48.8100349749783  
46.8249967544573 43.9994592139885 41.9069736908705 41.3094485574845  
48.1591264215184 44.3440839686558 46.1390887492649 43.1931731665131  
46.5905131500956  
ANKRD24 42.6575535390785 48.275452803061 42.9104454767916  
40.8681871019812 51.1915474019836 48.6621527194963 39.7576136507593  
48.9826868640753 43.5669306063196 55.8510296341925 55.898892031444  
55.216338306812  
ANKRD26 60.4593810615882 54.2445399731644 74.0913177754682  
51.3851157261451 81.0259717888094 58.8605811695948 70.8835636550472  
56.4779645313958 78.2393202422664 62.3997407955361 60.5608545741456  
66.0224755625662

ANKRD27 53.593974682612 51.524711857679 48.3847843498476  
39.066284740632 71.4183281327686 63.8740412329753 66.5422130374814  
61.130286531713 71.3932787152381 61.6670071424359 67.0361353184222  
61.2108152457954

ANKRD28 71.2246788429078 71.9539136431119 72.5288683768049  
83.764882413379 78.3542840447759 79.8026267036553 79.6581393791238  
66.9340967279385 64.0903425729408 84.1639779987105 72.6731815563159  
79.7808217577226

ANKRD29 40.8681871019812 43.5873188565519 44.2733573199954  
85.9799968870368 42.9655396732962 103.569150754726 38.6492234339227  
41.0844534776541 38.1169703906207 57.0581769379589 51.0492389286271  
52.2832912331043

ANKRD30A 38.7270975453573 35.8618428755446 37.4642807402741  
40.7941759414114 37.7115233202949 38.9378717994178 39.2809305246091  
36.43924066428 37.8319142847141 37.267270263961 41.3553369544097  
35.2115468000258

ANKRD30B 1311.88650141004 743.094853186365 868.899376368472  
1205.08559206317 597.996273468244 470.676006277762 976.566026758227  
2096.51999792183 529.210992541911 1578.32969650385 1673.60994518271  
1234.59589464045

ANKRD31 37.4554876386402 42.1607322031054 34.8956628705329  
32.9046688061235 41.8806343997257 33.6859433472087 36.8369172900902  
36.1375121409002 36.8127605061228 36.4651112441576 41.6336636285875  
34.4570158133896

ANKRD32 46.3884811643547 49.6479308322777 48.7039705048129  
47.0874209746031 48.5000946421718 42.808889470973 46.0228732507872  
54.720204938924 54.8439819445945 41.0057887014368 48.1552989524108  
44.9734311311394

ANKRD33 320.086549121732 187.347386400244 279.782392390288  
823.933615182634 197.52820443061 150.801729138762 193.01447006167  
233.539376791695 452.2453761868 282.115786635657 260.824949424185  
288.552986300755

ANKRD34A 45.1912496459517 44.0409178714232 40.1985790927248  
42.9358255168086 55.3100442506299 44.8872784170036 51.3064929551674  
42.8482181313226 42.7150227340364 56.057906531592 50.0303076717704  
47.3992733452821

ANKRD34B 45.1912496459517 36.1232327599945 43.3085358214154  
42.8235313007746 39.7568367479301 43.5752393599169 44.2166118829877  
39.4710743516517 42.6366765186182 41.8613406887824 39.6403089864678  
33.3192849177028

ANKRD34C 40.148780650831 41.159706131351 45.7968648044613  
51.5913529948887 40.4639532172338 44.6524308640784 45.223075311113  
43.4544762830742 46.2027193115397 42.6793753550854 43.3085358214154  
40.8681871019812

ANKRD35 83.2083460752986 51.3084273211359 77.3864518736634  
76.5411379733694 53.7554360529143 227.598514023545 40.6750540874299  
71.7624419474395 56.3737927112624 197.52820443061 169.970634268117  
98.4699679900651

ANKRD36 43.0568990939473 38.2688405721389 43.0555549979484  
46.839133315864 38.4135023167287 40.244271403831 47.091779053479  
45.505885458784 43.6670755115848 40.5537267820608 40.1428591998404  
40.3295323726475

ANKRD36B 56.8534370691413 48.743491202539 49.8899020044306  
68.8167148906225 49.5136713986758 53.6858208094027 74.0039764902057

67.2714646016644 53.2735797144627 51.5238121536228 56.9628808664342  
56.5914743235484  
ANKRD37 263.53897660224 364.628602969366 99.406307365363  
336.795797976236 91.9685593100867 186.965367827758 295.848968688724  
153.940127525369 539.471011648536 111.056599389048 96.3495443565738  
104.089998273812  
ANKRD38 60.2547250212462 39.7835513496873 48.7039705048129  
41.1886975241176 40.148780650831 43.4681646416585 45.4799270968969  
42.0494116081998 43.7630587657205 48.1392888470269 46.0905079010237  
39.1553169409075  
ANKRD39 128.923092916744 110.559251404688 112.007118067348  
99.2432911346944 136.736085245679 109.832638804839 131.097521229971  
100.989056102358 90.9202199678627 102.607924735378 91.5541137821803  
85.0113628886031  
ANKRD40 44.8914371498528 48.7084357480922 51.9214790114499  
55.6481366056639 41.8806343997257 46.4648868771662 38.1793598983615  
43.7396619462033 49.3780606970538 49.7259371799014 50.3876754565799  
51.8562635270111  
ANKRD41 49.085741080241 49.2050538150106 44.8872784170036  
51.2973486610884 88.9038123445083 49.1718303518849 49.1928206164702  
47.4740726032707 50.7619345314571 45.2556760873335 46.29198852834  
46.0106098064475  
ANKRD42 44.3355304829989 43.1805016690297 38.6727842796202  
44.1483976313959 35.6434124419782 38.2293008890613 44.0687697278114  
41.6466169548846 39.4762546236449 44.571915452417 41.8168470823451  
44.6484005362281  
ANKRD43 47.5647821785529 43.3458769998118 44.7829632472754  
40.8681871019812 42.7107928951766 47.3791873993182 73.6855877240541  
69.0819394834919 72.3095457386378 54.4825201506931 56.7765567227989  
70.6903168772326  
ANKRD44 70.88236913251 52.4665168142681 51.8636455065553  
63.3717459766798 48.6780871992396 45.5758521267508 57.0262601962425  
85.9474373829081 52.6922486991742 80.7986033188909 85.8277891453447  
70.25295977615  
ANKRD45 39.8662795144616 45.3486182278177 51.223859150798  
43.6726153508978 43.2484996523549 41.7627910693483 37.9430145836712  
40.1474543172332 45.7452456977857 40.8970401536578 39.8184668132023  
41.9430737035925  
ANKRD46 176.866350130563 173.856274004533 169.874602999057  
109.851796671234 266.702252514277 240.696431900526 317.406465928295  
133.314819245044 532.581631305218 235.764999941441 219.838542502016  
225.875798191473  
ANKRD47 49.3463416794995 62.0220558452834 64.0162246399972  
57.2856683017619 51.5888395924843 62.5542376788358 43.9450023643394  
60.5571721986885 51.6731332961917 56.685925255591 64.9959712888709  
51.0013344286851  
ANKRD49 170.850089909832 109.23113111292 137.696331574552  
129.190555260332 149.139710097196 166.168385855406 117.811967515956  
108.57858133896 119.253559091088 129.336439341458 118.251739134889  
139.731620245421  
ANKRD5 38.957687788868 40.8420925848403 41.0705134231814  
36.833813533944 45.5051950394186 39.2623423164488 40.0052661202207  
38.9207612933107 40.5491080069964 41.4606714407332 45.4304452450628  
38.3880780363593

ANKRD50 107.176733647834 119.263603432127 852.769974690777  
159.440571032045 208.3497732496 195.168348967505 225.50098418159  
86.0944261788554 768.888528247493 266.687281047486 310.358667418222  
501.452602126588

ANKRD53 38.6454098044474 41.8073910693411 45.3974838013476  
42.357910063876 48.2748123114598 42.357910063876 46.5650556481721  
43.3262148375525 47.1744296124496 41.7405682794166 45.5707650534259  
40.0557788909923

ANKRD54 161.910748720932 116.74427460886 111.735319884512  
96.7799695976296 144.976378707447 146.814825143817 178.675242612997  
160.917024416961 155.541828028535 139.999709303614 149.629940171074  
124.559758809231

ANKRD55 39.5676051939342 34.0382693188794 37.6557714476853  
53.8086134112366 45.1137938810047 40.1428591998404 38.8417151851134  
40.2382908228517 39.4762546236449 39.2623423164488 37.2018803984555  
35.7451401627836

ANKRD56 33.2552842693684 41.8848959280916 42.0621425894624  
42.1273928203021 50.3713170502557 37.3799542961839 40.4359177791566  
36.2539950294089 38.5252456306656 37.920964499903 44.0409178714232  
39.6352613956998

ANKRD57 274.887090359131 1120.83891847181 894.486674059951  
338.586852166449 445.875994521817 502.67939538729 395.298033031033  
1061.61186520958 734.143790759359 1366.59129560817 789.511653564341  
1021.71286017481

ANKRD58 42.2455707947223 38.2263227947189 35.6139301508335  
44.265834798964 37.2567512265363 36.2015763253919 37.830876898596  
36.9355798143571 39.853866204927 43.844855336215 42.170702295259  
37.0953622406687

ANKRD6 69.493532577364 51.9635228411223 58.2986825661503  
70.8288090024328 56.6951078698291 87.539553421006 78.212704825539  
112.506613718654 66.5461118812206 91.5825612510669 84.4349803529132  
81.4465496915693

ANKRD7 40.8681871019812 41.3610369241157 43.7630587657205  
40.2455972565968 43.9994592139885 41.6590564937735 40.968974769473  
41.4812544772644 39.8873706855774 41.4812544772644 39.9070785037411  
41.0226232127351

ANKRD9 259.769260154253 232.879882989322 299.334388262225  
141.79653024085 294.443061798191 167.229755109155 211.485592971588  
172.777241940677 343.418685340038 149.59360999995 131.68956899407  
159.12163104195

ANKS1A 437.280601907944 946.081492716653 250.176074707634  
169.425386468707 419.652892824029 484.218958528411 974.296760034984  
174.584330660466 403.92758879201 572.19538884395 597.191426276771  
524.451156145427

ANKS1B 42.668311948721 43.3030298816484 40.6216891610774  
42.7431359850339 41.6383327669122 67.2397076992564 43.1931731665131  
43.781101409552 42.8036731479932 49.3557747406709 49.0816063338953  
49.0048900199083

ANKS3 68.2614370871382 66.1863819168127 77.7907484334847 45.4634652319753  
78.0077300979911 63.5738862549306 77.2154078285418 55.5578334877425  
76.7100878053735 90.0767501615808 94.2275161759277 59.7999569757275

ANKS4B 42.1537476443423 40.5400384479766 39.9101908547397  
42.4580504587581 42.1650127805175 40.9506062495231 35.8227939208521

35.3608605269276 36.6312676076142 38.2069499294002 43.1931731665131  
39.2469742642337  
ANKS6 44.7915315085948 43.0971787292711 41.3366779545815 37.29566077996  
48.3814421939888 42.2577689927563 40.5585676679482 41.6466169548846  
41.5635499110307 38.8507804383261 42.911855821602 46.5650556481721  
ANKZF1 87.1735705257803 66.3404989659221 79.3066495980045  
66.9997306355227 92.9747592911324 61.0506827768127 70.8386539994956  
77.441946514938 80.4176406820326 96.7799695976296 80.1419822448876  
75.6428949408034  
ANLN 67.8774399765179 85.6038071277319 64.1080166181228 48.856176220627  
105.317399386109 50.2163892855092 90.4957279507369 89.2385568686014  
137.551493752877 40.3235655331796 37.4642807402741 40.3691324547049  
ANO10 99.3956523785983 133.798096986107 146.249568587351 118.911578268073  
165.974848305379 119.993761317523 167.229755109155 113.179313022693  
139.590367312743 138.189579100482 140.35042464015 113.277043026153  
ANO4 42.7150227340364 42.1607322031054 39.8299340037009 45.5869891570251  
41.6806984441849 41.0582900711341 48.8319884367456 43.7396619462033  
48.4869909888679 42.8936990772838 47.6884372645373 47.2131144508464  
ANO5 37.9387791625384 40.2493681589104 36.2683886571585 35.0448343468967  
35.0181575202066 41.8613406887824 36.634024014558 43.0390857698452  
37.7384958256497 39.9948390976317 41.7272875295469 40.4639532172338  
ANO6 277.936167684143 322.678762360476 240.731386634957 174.559216176175  
220.79051545138 408.991719312986 190.77754486426 190.940906139713  
339.679549262298 304.33749254654 339.313853828248 488.908231529696  
ANO7 41.9823787224629 43.4396866157171 41.3366779545815 39.3513480332078  
46.567903751033 38.4330755397458 42.7982502551634 42.0494116081998  
42.0621425894624 45.3872406432794 42.8710836704219 39.3002993140611  
ANO8 67.7831020218081 134.099684731177 76.1493261430901 47.481302504066  
99.8699868526053 49.641159251878 63.5738862549306 73.4820932957859  
77.1767494799711 56.685925255591 63.3544794716167 51.5741598315033  
ANO9 53.0290605707162 102.926945888985 139.218017862207 60.843426120801  
72.1591028956359 43.4681646416585 64.4127389689053 57.8111054584154  
66.0350709576651 82.1809804715696 80.0243450227647 70.6138659908885  
ANP32A 40.8681871019812 41.554942319225 42.4580504587581  
40.646702696033 47.6884372645373 45.1873487463472 41.253645578517  
46.695848687694 48.2123120250343 37.920964499903 45.390192977585  
49.2064066614865  
ANP32B 2215.01815680371 2206.44541412808 1423.29307392266  
1580.58484708669 1932.2647526188 2865.25344854768 2513.15722262176  
1801.44003951248 2266.34088015654 2024.4791883541 2191.09005731751  
2621.65272077828  
ANP32C 39.6609238036815 43.0227387991135 41.2365089689635  
41.8291484190524 41.2424637338424 43.6427759607073 45.223075311113  
46.3685439301234 43.9450023643394 46.441301934328 36.7892997857376  
45.8546719310325  
ANP32D 40.148780650831 37.920964499903 37.7384958256497  
36.0481934423077 41.8806343997257 37.0180934800573 41.253645578517  
39.6474008369935 43.1805016690297 38.528621456378 33.8558232866797  
37.6557714476853  
ANP32E 36.8072833828297 43.9421822132391 34.806104801006  
33.9645433044281 34.0927410219282 37.8102105794655 36.08956004634  
40.1474543172332 37.7384958256497 35.8304004211528 37.2892641289258  
41.2437378488025

ANPEP 101.103458852775 69.4820178305563 85.9692990407066 630.53864514662  
60.4122350478242 109.607667469015 103.118579484715 121.945468001236  
41.4636047919453 79.9810256029665 104.398842509776 63.8558858499025  
ANRIL 45.2875173643252 40.2493681589104 41.785676764591 42.1273928203021  
39.859345745831 40.244271403831 52.4111687156893 41.0381860307445  
48.2123120250343 43.6033221838149 39.7342718293432 45.7562276914441  
ANTXR1 615.838713743621 129.143252341926 99.3448096967314  
219.64979849407 194.570513601724 285.826380698286 89.847560289665  
221.450737998571 109.155021443311 283.88971280023 230.664926508522  
291.94914449218  
ANTXR2 664.453262499828 139.311807081199 214.537530518962  
581.396808977873 128.04037427867 893.185203928127 89.9284109077375  
233.539376791695 130.039674722115 815.810781070699 756.801598119483  
622.964590694346  
ANTXR3 36.9060997041453 38.2263227947189 34.6977013306396  
43.9282059368202 38.4540849632254 33.0463640202858 36.3194282084339  
36.6452480995946 36.197424053556 39.4710743516517 43.3085358214154  
40.4639532172338  
ANUBL1 45.1912496459517 42.9358255168086 38.1421709520616  
46.3203995372658 42.1650127805175 41.3553369544097 43.4544762830742  
45.2806199505029 37.7384958256497 40.7063426028871 34.8383995317036  
34.2141875904985  
ANXA1 2133.78836857697 1094.91235708087 949.278493776928 3478.67753301901  
738.66912772732 2697.96877833185 838.974043046676 1864.63057767867  
1037.51323185348 1468.75291542154 1199.29782389306 1981.03929621057  
ANXA10 36.4564050256915 1595.69503047506 2844.5506310828  
47.0874209746031 73.4535007027931 67.0290776715331 36.4098694708483  
151.438409623226 1698.18614771363 129.951091959262 397.199620114138  
735.751447981069  
ANXA11 88.1861828863404 160.733526836282 135.377859777529  
170.327588764719 91.8533850418261 130.192692323611 151.663341350505  
105.914573205761 311.502922515027 156.65747550889 227.317566600324  
186.984157187427  
ANXA13 39.3709357615493 39.9339434067497 41.2747736315207  
38.2516470858206 38.4113893955425 38.6414316877471 41.0995198212729  
38.745552403895 38.0658216688259 40.650742261428 36.7837318601824  
38.9074189954657  
ANXA2 2771.14077845128 1096.1705171588 953.143041145545 2243.24648907474  
947.656220635965 1421.44237064813 1349.09482344633 1271.62760896761  
1621.89443989657 963.224016480187 1097.92519921873 1480.95754707554  
ANXA2P1 476.421959423835 176.871009816977 134.394743648475  
395.457351443921 121.023370640285 211.164957509884 204.089652936303  
272.198774144152 271.275703732022 212.822978676596 214.051824405993  
303.139550962377  
ANXA2P3 69.4501305462809 46.2286164776607 49.9256753636167  
80.1809075683154 42.7107928951766 49.641159251878 54.6414321010929  
49.9332280449549 55.8510296341925 43.2988017098387 47.5439485437351  
48.0350549043063  
ANXA3 52.5792653122861 38.2263227947189 33.4240466670776 39.7411455670172  
41.6806984441849 49.9699131196797 34.806104801006 33.5578650644246  
37.10170285405 37.8217989841918 37.4642807402741 36.9976231206067  
ANXA4 61.1022920882065 50.0425298550559 45.7968648044613 54.6089451252049  
50.8875036861067 46.8954576545929 48.1747307200218 50.9933795450314  
50.1603795873336 43.2988017098387 49.1067959632109 44.3521099857368

|         |                  |                  |                  |                  |
|---------|------------------|------------------|------------------|------------------|
| ANXA5   | 1416.47763911039 | 527.238018264393 | 830.295872113419 | 2424.0414102425  |
|         | 448.446274966018 | 1506.33570635551 | 579.038638774301 | 644.733901442573 |
|         | 492.324859107777 | 759.566075437072 | 540.170798097714 | 924.316085565917 |
| ANXA6   | 68.6095266659765 | 53.2046867327331 | 55.5567699051046 | 83.555058970129  |
|         | 55.9283039581662 | 135.226924329183 | 37.830876898596  | 44.9631458622215 |
|         | 43.5669306063196 | 70.9702772728923 | 68.878562323012  | 68.3799828461475 |
| ANXA7   | 251.268123356533 | 234.408769393378 | 278.562093102424 | 319.092568066532 |
|         | 235.075347885884 | 401.45848063233  | 289.533968432846 | 228.499788774214 |
|         | 915.936211119242 | 320.555790243104 | 342.475405815033 | 397.850286751468 |
| ANXA8   | 73.7133884699889 | 283.257142524687 | 1588.70376317303 | 88.4036642243438 |
|         | 153.139323479953 | 69.3468840908665 | 80.2620230510528 | 160.056757080676 |
|         | 569.244038644604 | 260.656475394736 | 332.060941890092 | 272.405201392009 |
| ANXA8L2 | 57.50915811428   | 187.957702651679 | 461.83420090894  |                  |
|         | 68.0471049167726 | 70.0133734659853 | 52.7156971154405 | 75.4053820110486 |
|         | 59.4674205670657 | 214.484877083166 | 79.0249585610565 | 101.888001006345 |
|         | 104.704892803169 |                  |                  |                  |
| ANXA9   | 52.109723558511  | 51.8610060995363 | 57.2960245538881 | 34.9221408381038 |
|         | 73.6965494979349 | 37.3799542961839 | 62.0404348860702 | 385.064309855006 |
|         | 106.243765443714 | 39.6719190054379 | 50.7903824729818 | 40.0557788909923 |
| AOAH    | 44.6231541342    | 60.4646208319121 | 56.0477607422828 | 136.236041346288 |
|         | 57.6791750431251 | 51.8103411703261 | 62.5506324864207 | 54.8412943008635 |
|         | 44.8997235283254 | 49.7259371799014 | 47.299647867533  | 45.8546719310325 |
| AOC2    | 40.7063426028871 | 41.2176232897704 | 47.4356803320662 | 42.5054997771887 |
|         | 43.6880562748566 | 42.0574848021044 | 41.8887298788489 | 46.1081155967151 |
|         | 43.0342930070984 | 45.0155543555707 | 45.0997987980157 | 47.9566297250148 |
| AOC3    | 43.844855336215  | 47.9665737016961 | 45.310660704531  | 36.3604951341921 |
|         | 47.2074332636566 | 63.1091746640396 | 34.4570158133896 | 42.7431359850339 |
|         | 31.372171135652  | 52.7972156492746 | 41.8168470823451 | 43.6753843488695 |
| AOF1    | 40.4639532172338 | 40.6380495994768 | 39.4710743516517 | 38.745552403895  |
|         | 35.2163900400329 | 39.6251842352088 | 48.3411413510851 | 41.4508241771315 |
|         | 40.0403898620771 | 37.2089297656361 | 41.4508241771315 | 37.5556299264699 |
| AOF2    | 841.850722284484 | 456.757277476069 | 467.351570171652 | 230.401917528056 |
|         | 803.548811322583 | 277.5073518536   | 839.850453078119 | 938.151864971251 |
|         | 621.489785652602 | 577.993850127555 | 508.081726674689 | 442.711822532078 |
| AOX1    | 45.4799270968969 | 45.4143854024453 | 36.8730514568925 | 91.5202521578181 |
|         | 36.9060997041453 | 365.792144095604 | 40.0052661202207 | 38.5457716679071 |
|         | 38.4344387289956 | 102.044838876428 | 100.663054866186 | 106.020559220488 |
| AOX2P   | 42.442231667357  | 43.1805016690297 | 45.6989664108554 | 39.5050383901884 |
|         | 35.2163900400329 | 45.3882138838137 | 40.2154497375715 | 42.0494116081998 |
|         | 37.7384958256497 | 39.4710743516517 | 41.9083581529276 | 41.0657892043496 |
| AP1B1   | 104.462230406058 | 183.526640731647 | 154.166621635012 | 116.122324921267 |
|         | 141.180682718758 | 99.7807691901691 | 178.789064142469 | 168.70463124443  |
|         | 163.62024333166  | 140.698550434486 | 193.758357282411 | 149.118265845458 |
| AP1G1   | 134.407474121421 | 139.758805241617 | 178.323615832679 | 123.768417863139 |
|         | 103.133138547093 | 107.391994714261 | 112.519759295176 | 124.18058128276  |
|         | 152.649165330093 | 95.1513370156467 | 135.644934816665 | 139.142835448881 |
| AP1G2   | 202.795613942391 | 229.659465419141 | 334.349204174886 | 83.6935756500468 |
|         | 142.957149812186 | 59.2012779686869 | 134.567947469561 | 125.061012833314 |
|         | 180.029671376384 | 214.774035015293 | 208.410194427484 | 201.208357379329 |
| AP1GBP1 | 45.1569741609597 | 57.9941756686635 | 57.8715555065641 |                  |
|         | 56.9299697426319 | 46.7508829977587 | 41.9543948167375 | 44.6809101024392 |
|         | 50.857522488428  | 54.7033747046992 | 50.5734308316823 | 48.5835484742456 |
|         | 49.904979214379  |                  |                  |                  |

|       |                  |                  |                  |                  |
|-------|------------------|------------------|------------------|------------------|
| AP1M1 | 227.170944398338 | 260.824949424185 | 369.952313383216 | 322.774093041134 |
|       | 358.498678171092 | 309.802432824498 | 231.472806936915 | 182.976132230487 |
|       | 262.277293680018 | 256.364301298918 | 300.412043023998 | 273.705329906513 |
| AP1M2 | 36.1232327599945 | 50.0425298550559 | 53.5698357689852 | 32.554751989205  |
|       | 49.5666074434383 | 39.9397419279057 | 50.8388984085636 | 50.7364620410977 |
|       | 62.0272989884264 | 46.7646877499666 | 62.2200723764909 | 51.6660481331154 |
| AP1S1 | 166.644251737703 | 317.560970617018 | 177.261319004133 | 118.044483475719 |
|       | 174.416924448198 | 89.7862835647016 | 210.958578914607 | 183.286063142727 |
|       | 386.00975855841  | 100.756165194192 | 89.3228209926236 | 183.918927595056 |
| AP1S2 | 233.232472394727 | 135.836577310513 | 226.567000755017 | 1039.06999658544 |
|       | 98.2280780221631 | 536.73426937255  | 114.396745444915 | 138.436822676252 |
|       | 65.8306182796781 | 173.5606219477   | 150.009352890706 | 218.552143403657 |
| AP1S3 | 38.0089018744739 | 37.7384958256497 | 39.0775870687758 | 36.3604951341921 |
|       | 40.0599807618105 | 38.8336427948187 | 32.6039814489621 | 39.6474008369935 |
|       | 37.10170285405   | 43.4885245598939 | 40.8225507267584 | 40.7704587752083 |
| AP2A1 | 52.7466456080101 | 67.6169355376864 | 58.4591497641998 | 57.2856683017619 |
|       | 67.222434502867  | 60.2554326890045 | 56.154679970047  | 69.3883443059504 |
|       | 73.8800799416166 | 59.7240416362194 | 67.3439996689706 | 53.5966673719267 |
| AP2A2 | 92.6545309624315 | 63.6287257620165 | 74.9113162056974 | 74.6159297822533 |
|       | 65.1757400078647 | 126.485649460666 | 69.6301237585571 | 64.5257016285499 |
|       | 92.1817062395346 | 95.92436282414   | 132.555169949054 | 80.4404044229341 |
| AP2B1 | 97.3188285021124 | 82.9322141700549 | 79.1257499539205 | 96.4913003384143 |
|       | 126.204310123186 | 89.4111455826308 | 133.151333210366 | 161.500218853268 |
|       | 123.933814581281 | 116.17375251898  | 115.299308625328 | 105.807556324486 |
| AP2M1 | 478.296779356592 | 385.064309855006 | 486.911782180966 | 407.336051853854 |
|       | 597.191426276771 | 500.168833003599 | 428.307428028806 | 382.872356030213 |
|       | 538.716947884528 | 534.629009719855 | 535.585999498708 | 454.106740411779 |
| AP2S1 | 3966.51586153125 | 1845.34855798442 | 1921.48678333837 | 2488.32876359853 |
|       | 2803.11698341125 | 1864.63057767867 | 2417.02418518222 | 2146.1548633579  |
|       | 2803.11698341125 | 1442.72006787259 | 1626.71747158994 | 1351.49940447914 |
| AP3B1 | 422.474427987338 | 727.788854407888 | 621.980260052085 | 580.109585240053 |
|       | 437.411540294212 | 419.741944629785 | 459.182372959714 | 402.794855141389 |
|       | 651.078746026341 | 475.159378115819 | 477.263677441074 | 616.912306849151 |
| AP3B2 | 56.6086202928268 | 37.6383530120621 | 36.8730514568925 | 45.5869891570251 |
|       | 42.269054475455  | 47.0940613507321 | 49.8281348927244 | 66.211494935811  |
|       | 37.8319142847141 | 67.3308332069908 | 51.3103617600342 | 47.0130468198828 |
| AP3D1 | 162.447872391923 | 217.875223856197 | 188.900125060451 | 192.922622120507 |
|       | 276.86542239106  | 185.191228931155 | 169.527304857688 | 188.692678542986 |
|       | 197.325473090277 | 160.733526836282 | 160.868571611805 | 146.432425205891 |
| AP3M1 | 141.255712367708 | 189.245501343165 | 190.099949303905 | 149.747000657513 |
|       | 163.809567262808 | 180.562005428669 | 158.464244518317 | 105.686346729469 |
|       | 359.185856400148 | 125.052841200703 | 147.841274204532 | 200.318682162912 |
| AP3M2 | 282.68881112438  | 193.730784033221 | 172.789150115627 | 129.190555260332 |
|       | 230.344359535334 | 139.445008123768 | 201.657389063895 | 294.7772562683   |
|       | 177.494605794577 | 437.280601907944 | 325.224254365274 | 386.98657211459  |
| AP3S1 | 136.786772972738 | 139.022985518859 | 182.31306890697  | 247.04098109003  |
|       | 150.925721934159 | 415.759723627205 | 148.570371099987 | 156.433762355183 |
|       | 233.07404514708  | 149.076166432567 | 139.543015878846 | 196.096147690942 |
| AP3S2 | 76.3933911546385 | 59.1938299291358 | 50.6004078448405 | 62.6048727240291 |
|       | 67.8233625051884 | 88.7605288058249 | 87.3508610599789 | 79.9597944271831 |
|       | 87.7881690937563 | 93.5511826850067 | 88.5511408870489 | 87.5759422500374 |
| AP4B1 | 186.450759425396 | 136.140128421585 | 160.566474370004 | 172.789150115627 |
|       | 167.653939596625 | 134.239606718101 | 155.406719968961 | 168.522052983892 |
|       | 157.020685801527 | 161.326580647514 | 164.44912535816  | 148.043320937247 |



|         |                  |                  |                  |                  |
|---------|------------------|------------------|------------------|------------------|
| AP4E1   | 107.637618676176 | 110.559251404688 | 91.0443726041992 | 130.10148014895  |
|         | 96.6128615107975 | 112.721024337362 | 121.050369804136 | 135.829530518199 |
|         | 124.22494803053  | 180.255771684507 | 191.811190401876 | 143.749408328062 |
| AP4M1   | 47.9175508887533 | 54.6793272901524 | 56.1434024065079 | 41.1886975241176 |
|         | 57.9161791762225 | 47.9503724044453 | 50.8388984085636 | 74.0831311663524 |
|         | 56.2441895183416 | 60.7495043977707 | 52.022479439889  | 49.8253396161069 |
| AP4S1   | 54.7786516309154 | 54.4190527512508 | 53.5698357689852 | 57.4595416719581 |
|         | 50.2163892855092 | 64.0985088513857 | 52.8496345990125 | 53.838484549134  |
|         | 56.6079099547057 | 47.3791873993182 | 55.3147456054175 | 50.656598108034  |
| APAF1   | 96.8098282020349 | 124.803597244786 | 115.610095595509 | 123.608921653229 |
|         | 87.1109435144663 | 93.5045354990096 | 153.436974478757 | 91.7679182632783 |
|         | 126.088821850066 | 101.020328028769 | 96.6969760559963 | 107.211374033204 |
| APBA1   | 40.9558083259517 | 38.2835812177457 | 39.9101908547397 | 39.2780515621926 |
|         | 39.2608760193011 | 41.2567470068038 | 38.8775560911841 | 42.5435283762933 |
|         | 40.2615278292875 | 43.8710182120571 | 40.4094901248527 | 37.8490162439785 |
| APBA2   | 37.9387791625384 | 36.7976562409506 | 38.8775560911841 | 41.0726336841311 |
|         | 36.4434672195785 | 41.7627910693483 | 42.0605906240248 | 39.6474008369935 |
|         | 39.7537274655115 | 40.5090849993014 | 39.9070785037411 | 38.5279745308203 |
| APBA2BP | 38.7537364570873 | 40.0984333134909 | 39.779935291659  |                  |
|         | 38.042028333747  | 39.2114264935239 | 38.1699123824764 | 41.9393838138203 |
|         | 37.5511560880902 | 35.0033376705042 | 36.7439906400209 | 39.4410515050885 |
|         | 40.4192415967414 |                  |                  |                  |
| APBA3   | 173.035987237848 | 142.221867895111 | 190.403032965372 | 222.617854741466 |
|         | 288.284384035759 | 153.42135363926  | 158.590601962928 | 135.706144105357 |
|         | 161.817972012879 | 124.56803502087  | 124.204392146484 | 117.052403700291 |
| APBB1   | 41.9823787224629 | 42.4715575796089 | 41.7442113152211 | 39.0266821712099 |
|         | 40.8351751854504 | 36.3419131924389 | 38.0598374201407 | 38.7229679986571 |
|         | 39.0470836345045 | 39.8511044247748 | 40.0394833064005 | 41.8982199176791 |
| APBB1IP | 115.10044062133  | 119.362992523422 | 115.256208610595 |                  |
|         | 861.729405234231 | 244.089971761037 | 184.105396912056 | 144.456117600129 |
|         | 234.615033303459 | 59.5929655877036 | 101.954354107731 | 114.78317743597  |
|         | 86.1433529921684 |                  |                  |                  |
| APBB2   | 57.1046180136491 | 50.1027491117756 | 55.7764940944098 | 43.074472921841  |
|         | 50.7615314686244 | 60.7488007939604 | 43.8206425661746 | 44.7044140979108 |
|         | 47.1744296124496 | 44.8997235283254 | 52.022479439889  | 47.3992733452821 |
| APBB3   | 273.231509963261 | 274.493399403322 | 247.723546145775 | 234.043251639296 |
|         | 257.662291702982 | 189.915336406793 | 173.603999265239 | 205.051252996628 |
|         | 148.016994658777 | 251.210603834628 | 249.451753363306 | 168.307676704652 |
| APC     | 36.3649677956953 | 39.7835513496873 | 36.3604951341921 | 37.5382094267692 |
|         | 37.6527901109005 | 37.4782441311626 | 40.7910160811527 | 36.7460922671619 |
|         | 36.2733735494625 | 35.8304004211528 | 41.7272875295469 | 37.2810767789306 |
| APC2    | 39.0620487644635 | 43.5873188565519 | 38.2280071951674 | 40.0698728584484 |
|         | 44.0451487108213 | 37.3799542961839 | 45.1017494688414 | 47.7889447429963 |
|         | 40.137818555383  | 40.1179210534118 | 41.0808257270221 | 44.4475838947656 |
| APCDD1  | 109.5145190042   | 141.994123068328 | 380.988918630713 |                  |
|         | 127.986477405999 | 182.204124363356 | 302.79352975792  | 53.3111230705754 |
|         | 137.555275829874 | 72.4220552950926 | 306.115856873599 | 532.581631305218 |
|         | 161.109600577001 |                  |                  |                  |
| APCDD1L | 97.2535496140648 | 41.554942319225  | 43.8495248991589 |                  |
|         | 87.114638423256  | 46.3150221024046 | 89.5597629049747 | 39.4600924554505 |
|         | 46.9986083378817 | 37.10170285405   | 112.281286038716 | 144.098339910117 |
|         | 75.1674447943072 |                  |                  |                  |

|         |                  |                  |                  |                  |
|---------|------------------|------------------|------------------|------------------|
| APCS    | 53.2046867327331 | 46.9919960628953 | 46.6588655218735 | 47.3574589211166 |
|         | 52.6922486991742 | 47.0940613507321 | 53.0277416531043 | 50.628152951493  |
|         | 50.6750785584772 | 49.0841460667818 | 49.9338905397767 | 43.4709415392696 |
| APEG1   | 60.1705241170421 | 45.8669209716694 | 43.0016969050339 | 39.7411455670172 |
|         | 51.1368583672022 | 75.5561597374812 | 43.5627649099623 | 46.695848687694  |
|         | 40.7847110517594 | 52.2256177934134 | 65.9273663561152 | 48.1627097465883 |
| APEH    | 229.159869771704 | 427.972184856393 | 484.050852319927 | 297.187417426993 |
|         | 491.100053064936 | 266.905855859261 | 487.540800793233 | 325.769076169162 |
|         | 419.741944629785 | 446.37035118289  | 455.774407260725 | 381.6928205836   |
| APEX1   | 1142.67599037881 | 856.790359133679 | 720.552354470517 | 448.446274966018 |
|         | 855.602941621804 | 661.269882993465 | 809.577874019028 | 553.517839467557 |
|         | 934.48498309932  | 467.351570171652 | 546.94113683381  | 587.385368995676 |
| APEX2   | 331.984279378726 | 277.665554240228 | 338.000998124097 | 216.744244428166 |
|         | 283.563531065269 | 197.103673938152 | 556.728676214581 | 317.892699374852 |
|         | 325.363156416947 | 218.056839407813 | 254.874064929741 | 197.660480001139 |
| APH1A   | 374.167501183341 | 330.550018306903 | 371.709014310561 | 216.976116788572 |
|         | 426.015657750123 | 164.96500173066  | 273.231509963261 | 477.023373302787 |
|         | 357.839241226513 | 255.724996015069 | 303.670126704469 | 239.316215255944 |
| APH1B   | 130.703767898434 | 84.5572894783679 | 114.488672372067 | 301.79813401066  |
|         | 146.701131209299 | 91.640286556353  | 113.866742186841 | 229.745018977185 |
|         | 82.7229468743536 | 119.301672388541 | 116.304054038726 | 103.458867136383 |
| API5    | 251.268123356533 | 326.500804513133 | 305.048508698231 | 297.701126167694 |
|         | 195.864827360933 | 410.808988840343 | 266.717224821545 | 364.534123862511 |
|         | 274.731304343034 | 351.951456642829 | 357.839241226513 | 412.421643885499 |
| APIP    | 84.7222416138393 | 139.862070204656 | 131.097521229971 | 165.029434090892 |
|         | 122.576931376426 | 188.713487905549 | 140.199798713912 | 181.814283147675 |
|         | 133.344625514809 | 99.3956523785983 | 108.881703882906 | 185.667983376361 |
| APITD1  | 82.0292880742189 | 106.809028844031 | 91.4581948567397 |                  |
|         | 60.8581462216607 | 82.3181867658154 | 72.6182747525443 | 136.293724800658 |
|         | 97.2750076101755 | 101.375030043104 | 60.6779753362314 | 78.5325880060762 |
|         | 101.337735124049 |                  |                  |                  |
| APLN    | 55.3153799233744 | 43.0971787292711 | 60.6567691532561 | 48.9944486068347 |
|         | 44.6834648302383 | 40.7616966228404 | 40.1235656101329 | 40.6171774724171 |
|         | 54.0192060888782 | 41.2276963324981 | 42.5426057453993 | 43.7672102682067 |
| APLNR   | 77.1900613562529 | 103.071727621257 | 96.2739664178142 | 249.148159759128 |
|         | 60.5290966885203 | 107.148000219752 | 54.339958888486  | 74.7794253940974 |
|         | 43.7630587657205 | 45.4614234442527 | 55.1099824417989 | 42.7782216342806 |
| APLP1   | 39.266565827316  | 39.8695929627783 | 38.6414316877471 | 36.7892997857376 |
|         | 38.5512429290626 | 39.7394181011603 | 37.3799542961839 | 41.9315419791594 |
|         | 38.4970433581463 | 33.8440826703183 | 37.6159995071541 | 41.6550823405646 |
| APLP2   | 198.682422442825 | 193.094756585577 | 313.594031411352 | 226.785831708938 |
|         | 178.060342847557 | 230.197573134703 | 179.07886477603  | 259.456935785521 |
|         | 331.001195453225 | 293.755623192857 | 281.602712448925 | 210.843643231855 |
| APM-1   | 99.0545942554244 | 186.195424728755 | 202.360546931172 | 52.5307002738469 |
|         | 60.0736861987141 | 61.8187341713197 | 165.606015336587 | 111.573111498905 |
|         | 248.258290059808 | 187.836567614419 | 132.931052537195 | 102.49785018292  |
| APOA1   | 36.6480005877129 | 39.0894172982439 | 29.9932610852132 | 34.8137085420423 |
|         | 39.2608760193011 | 44.5544727111028 | 44.0687697278114 | 40.3357777530419 |
|         | 35.2143190355414 | 43.4885245598939 | 41.0050831223107 | 40.2669497398702 |
| APOA1BP | 508.688028777582 | 446.37035118289  | 796.359355922952 |                  |
|         | 338.415128695208 | 741.908952472992 | 475.881757842864 | 478.296779356592 |
|         | 505.294880430281 | 593.345148568451 | 391.83348187444  | 445.644244692294 |
|         | 420.197648653758 |                  |                  |                  |

APOA2 42.7150227340364 46.5650556481721 45.4865173433646 44.550322123994  
42.269054475455 39.8455060654531 40.6750540874299 41.3506832276112  
48.8842909466002 48.7414853386615 44.7926323492519 42.4607795638552  
APOA4 37.2474303302343 32.396635964353 36.0306975524309 36.9912468186322  
35.1411239266238 33.2552842693684 37.4772922422734 37.6557714476853  
37.2810767789306 38.2069499294002 33.6902293666089 35.5523662009011  
APOA5 43.4626049853157 36.9994058279362 39.5450079747895 39.1706564265495  
37.1565984182084 34.8956628705329 40.2154497375715 42.157627240486  
40.7847110517594 37.2089297656361 41.5421429082231 35.5523662009011  
APOB 35.0202257459026 41.159706131351 38.4043916290561 37.8442841690502  
38.9496515344837 42.9695585740813 39.0458123429605 35.0510338774593  
39.6609238036815 37.7315666632629 39.4410515050885 37.5556299264699  
APOB48R 49.8472708021525 49.0697565324841 76.0240426902567  
196.065114892186 41.1868052124344 53.3185097662527 58.5087296620514  
55.1109784383525 35.7973685350741 101.58345410371 86.1055862202537  
73.1447139654971  
APOBEC1 47.6397712007919 42.7775752471711 43.6670755115848  
37.651298468202 40.4639532172338 47.9503724044453 40.4359177791566  
41.6466169548846 41.1742244762318 41.3321861371202 43.4709415392696  
41.2437378488025  
APOBEC2 45.6517320730042 40.9731067463382 36.8730514568925  
38.2041059863839 39.6535880152834 40.1428591998404 39.5496902678788  
38.8495095797881 38.8271346375425 41.5435611403119 42.357910063876  
45.0035308952466  
APOBEC3A 39.4710743516517 36.3110701990588 36.769073068743  
43.074472921841 34.9062568194127 35.8227939208521 41.8315602975157  
46.8954576545929 33.8558232866797 37.3179578037963 34.174642681781  
36.8690774823319  
APOBEC3B 76.5505585423421 95.8446272966902 51.6159542017038  
51.949834638817 86.8871118411414 42.8598805316863 311.301613620475  
189.650905999631 113.026772174726 36.2435874904689 42.357910063876  
46.5650556481721  
APOBEC3C 64.4415447415281 60.9311907846259 69.9179689232341  
63.1604223919703 57.4163094213712 53.0290605707162 102.993620677265  
205.154378853199 75.9909523932333 112.02980664709 82.1659654020827  
78.1623301184313  
APOBEC3D 48.8941062980393 38.3322849790657 39.0775870687758  
39.2780515621926 43.004943518025 39.2248354955045 40.7910160811527  
39.4710743516517 40.4220196471124 41.1222709786153 40.9157352260901  
42.8864415494484  
APOBEC3F 82.1509530759594 85.9799968870368 72.1591028956359  
79.7061415085215 76.0496166059449 72.9154861179393 162.000275136397  
155.564141715819 78.055431384988 75.6471706262645 73.5527788467294  
73.6036945547683  
APOBEC3G 98.6401096175932 145.459578481501 125.690995228055  
160.187478921145 164.312946712409 115.143810463938 704.15545332905  
726.42773300581 151.266092912661 72.9126349246129 99.9752275166514  
97.8764110456132  
APOBEC3H 42.6036491382658 49.4067286971348 69.7855392178808  
49.3654837541353 39.1650142708257 41.6590564937735 53.1884505015411  
55.1933004802607 50.7619345314571 48.0211752672327 46.4205654140754  
45.0035308952466  
APOBEC4 39.5676051939342 37.1685072112618 34.806104801006  
43.4410741327254 39.2608760193011 45.3882138838137 43.4544762830742

|        |                  |                  |                  |                  |
|--------|------------------|------------------|------------------|------------------|
|        | 38.2782436497441 | 43.0930293831497 | 48.6124127998952 | 35.3362091871364 |
|        | 38.2350720635382 |                  |                  |                  |
| APOC1  | 345.876877384089 | 130.121040883877 | 126.171040948196 | 815.810781070699 |
|        | 157.250548147161 | 89.0495215957248 | 296.463473585355 | 446.613670519745 |
|        | 103.423003544792 | 132.851109034738 | 115.204421753719 | 67.1675878355908 |
| APOC2  | 44.0328992213727 | 43.9421822132391 | 41.528370959196  | 41.8778873678551 |
|        | 40.6723334103791 | 41.7627910693483 | 34.2773859804062 | 39.9576138799997 |
|        | 37.3600014814388 | 34.3674468322242 | 44.1148826235374 | 35.9604262434141 |
| APOC3  | 38.7537364570873 | 41.2598458726002 | 36.3604951341921 | 45.4634652319753 |
|        | 42.269054475455  | 42.0574848021044 | 41.5817737564592 | 38.1835938174625 |
|        | 41.1742244762318 | 43.4885245598939 | 43.844855336215  | 37.8490162439785 |
| APOC4  | 39.9697332660833 | 42.2577689927563 | 36.8730514568925 | 44.4367387274922 |
|        | 39.1650142708257 | 39.6251842352088 | 44.6032218589199 | 43.4544762830742 |
|        | 43.1805016690297 | 42.0621425894624 | 40.8225507267584 | 41.3481355128089 |
| APOD   | 390.331295238889 | 89.0898346470643 | 53.2046867327331 | 181.488068017883 |
|        | 211.485592971588 | 3190.0108307463  | 41.4742337714895 | 174.021676013865 |
|        | 55.2114969675545 | 1575.71609894038 | 1225.62057881626 | 2551.57660786358 |
| APOE   | 2266.34088015654 | 580.109585240053 | 411.981987305512 | 3618.78958408675 |
|        | 766.647626178442 | 918.083610591772 | 1004.28134410536 | 1554.42895572029 |
|        | 146.117756310709 | 137.294289316915 | 100.883604376864 | 94.8036856848998 |
| APOF   | 41.3387790895716 | 39.9697332660833 | 39.7411455670172 | 40.5484717678957 |
|        | 41.8806343997257 | 37.7000400506818 | 41.5817737564592 | 38.6454098044474 |
|        | 42.2577689927563 | 39.0648733099061 | 44.2925355984056 | 41.4508241771315 |
| APOH   | 38.6454098044474 | 37.2810767789306 | 38.3166554965434 | 37.29566077996   |
|        | 36.6354013629791 | 39.2985791324641 | 42.357910063876  | 41.4508241771315 |
|        | 40.2274522635576 | 41.6373771565199 | 40.6373400186325 | 40.7704587752083 |
| APOL1  | 50.0466349801009 | 109.23113111292  | 94.1627883101274 | 46.8249967544573 |
|        | 47.6884372645373 | 47.0504142893738 | 96.1825551158198 | 55.6904617926772 |
|        | 76.6389264422388 | 46.8954576545929 | 61.130286531713  | 55.9927099883616 |
| APOL2  | 59.5612330871274 | 90.9010016862442 | 105.15507796881  | 43.4877740913713 |
|        | 48.3814421939888 | 49.2677835329543 | 83.0207998537207 | 76.7063975550116 |
|        | 79.8913276294876 | 73.5743059777365 | 64.3312319756553 | 59.5370927657967 |
| APOL3  | 58.7065473526185 | 68.3604212141462 | 70.380703483689  | 77.5889289318438 |
|        | 42.9627566278041 | 95.2956103624468 | 61.4121672148248 | 62.3470274683312 |
|        | 73.0403099404    | 57.6791750431251 | 67.8067315230738 | 63.8558858499025 |
| APOL4  | 45.334106390212  | 52.0770287673248 | 48.7646976789783 | 43.367124590178  |
|        | 51.1368583672022 | 42.808889470973  | 54.5772630900888 | 63.1291723738553 |
|        | 55.1804535845496 | 41.5435611403119 | 41.6336636285875 | 39.9519547348106 |
| APOL5  | 36.0144420013819 | 46.5650556481721 | 43.0016969050339 | 36.890925044696  |
|        | 43.844855336215  | 41.7627910693483 | 41.8315602975157 | 39.7509165247419 |
|        | 40.8970401536578 | 44.6918600441328 | 40.8225507267584 | 35.4484652445078 |
| APOL6  | 40.4639532172338 | 47.9665737016961 | 39.7411455670172 | 58.0218262176065 |
|        | 40.4639532172338 | 46.8954576545929 | 40.7910160811527 | 46.1673159982664 |
|        | 53.2046867327331 | 37.7315666632629 | 42.7275315121163 | 47.6938628797168 |
| APOLD1 | 90.1056480599534 | 169.838827072973 | 360.784460384046 |                  |
|        | 198.324467851365 | 117.033529761587 | 393.001025840896 | 59.3549213146532 |
|        | 213.768352764473 | 57.3385421837183 | 71.7464249053513 | 112.048972076936 |
|        | 104.02653369229  |                  |                  |                  |
| APOM   | 49.2595762436995 | 46.0713306971594 | 61.1076362129586 | 66.4047895961325 |
|        | 64.193536444915  | 58.0910843932181 | 56.9320717885002 | 49.3880946790306 |
|        | 56.702421372165  | 48.7414853386615 | 55.6151308605445 | 54.1090536870282 |
| APOO   | 60.8357760968871 | 76.7710944291287 | 73.967017874248  | 72.6824533717231 |
|        | 79.5175547131776 | 76.7791768896805 | 97.299696284253  | 85.0308877626746 |
|        | 91.4121563150184 | 80.7338782543351 | 56.3106156221316 | 76.7791768896805 |

|        |                  |                  |                  |                  |
|--------|------------------|------------------|------------------|------------------|
| APOOL  | 52.310270746917  | 50.9643363406241 | 55.8810837854139 | 53.9517841438975 |
|        | 43.2484996523549 | 48.8744644207821 | 69.9214859673839 | 66.1288889125299 |
|        | 58.8201021345225 | 44.3648993568405 | 43.6629145624937 | 47.1060577218993 |
| APP    | 439.376432049616 | 615.011590811277 | 680.837950890159 | 316.327885002562 |
|        | 690.568858101531 | 929.862002014478 | 388.336994961328 | 233.710655978992 |
|        | 425.60854194674  | 299.74710723735  | 516.349618186681 | 633.819901764391 |
| APPBP2 | 114.888828460086 | 140.465247047676 | 100.057155418659 |                  |
|        | 88.2314365506494 | 121.552188287725 | 148.529482776555 | 113.539485042978 |
|        | 76.8964050504238 | 133.344625514809 | 144.239350177363 | 132.425058995617 |
|        | 158.532307373857 |                  |                  |                  |
| APPL1  | 73.8374823243007 | 73.0385284042351 | 62.7605715573218 | 66.9218519793499 |
|        | 65.6003544901554 | 69.2685201884906 | 102.00080367858  | 86.3237770387663 |
|        | 70.7238101239421 | 74.8170892324966 | 68.3799828461475 | 66.4626619269287 |
| APPL2  | 310.461601607662 | 289.213144287085 | 236.488376031891 | 166.304210248623 |
|        | 161.573327074375 | 193.395549316561 | 205.510539955583 | 161.422918681934 |
|        | 326.250872625748 | 179.953662481428 | 169.75692324104  | 184.421617360366 |
| APRIN  | 41.5421429082231 | 39.6995529770239 | 45.063792968927  | 42.1273928203021 |
|        | 42.4864576619427 | 39.7394181011603 | 38.5066108855005 | 51.7538628098347 |
|        | 41.9635525160083 | 46.0119912782855 | 43.3085358214154 | 40.3691324547049 |
| APRT   | 310.120875196999 | 465.266372824212 | 821.013687795434 | 313.660064080622 |
|        | 560.802447943839 | 309.022069786139 | 490.301992866742 | 339.854688605186 |
|        | 512.691506909762 | 396.355023788839 | 340.662853333208 | 329.282615395786 |
| APTX   | 130.925724760241 | 104.900627862215 | 83.2240772671045 | 87.4850071876743 |
|        | 111.096799408676 | 98.2843999216669 | 176.318618244066 | 138.26207427245  |
|        | 109.565260080683 | 137.547711779867 | 142.714450804595 | 149.747000657513 |
| AQP1   | 48.9906383294199 | 49.32293280121   | 47.0474493061198 | 55.2214187655851 |
|        | 42.3536549114165 | 86.3185927557402 | 40.4359177791566 | 45.5581356216957 |
|        | 43.6039443285137 | 53.2160608018435 | 77.6052681514721 | 75.9136854087044 |
| AQP10  | 34.8099089553046 | 59.4253780950488 | 37.5597671487621 | 47.9915414951747 |
|        | 43.7517118200398 | 50.3245489035833 | 51.3064929551674 | 44.6107027295193 |
|        | 44.8003345643334 | 41.4397539024976 | 51.7538628098347 | 44.0451487108213 |
| AQP11  | 59.9232969481163 | 44.3529919625344 | 42.3536549114165 | 66.5921967967793 |
|        | 44.147557390293  | 42.357910063876  | 54.6414321010929 | 47.8947595316832 |
|        | 50.0526763693329 | 49.8393069675192 | 46.3370338074996 | 38.745552403895  |
| AQP12A | 47.5647821785529 | 91.9238405195899 | 107.251974803232 |                  |
|        | 61.0845101400379 | 40.7779767565889 | 49.7458652239071 | 45.1017494688414 |
|        | 48.4670130605028 | 42.8036731479932 | 41.3321861371202 | 38.8507804383261 |
|        | 39.3575468494941 |                  |                  |                  |
| AQP2   | 41.4508241771315 | 40.3384318592985 | 43.3085358214154 | 48.1662933382789 |
|        | 36.9702228618069 | 37.9003288112261 | 40.6750540874299 | 46.1673159982664 |
|        | 42.992884918158  | 37.6383530120621 | 39.9899430628542 | 45.3763275588341 |
| AQP3   | 39.1590964332473 | 45.2556760873335 | 43.7630587657205 | 40.1804147506786 |
|        | 37.6527901109005 | 40.7616966228404 | 32.4466419672036 | 39.6474008369935 |
|        | 46.3203995372658 | 46.441301934328  | 44.0409178714232 | 53.655233033193  |
| AQP4   | 38.6454098044474 | 40.2093230376545 | 39.6451483836089 | 37.1894304543751 |
|        | 37.956732373465  | 40.3357777530419 | 39.8299340037009 | 35.3608605269276 |
|        | 38.1658452457336 | 40.5571841955033 | 43.2551508830106 | 39.9941474864076 |
| AQP5   | 41.2424637338424 | 39.0894172982439 | 43.7630587657205 | 36.5393857306744 |
|        | 36.7356360093603 | 36.3845892764084 | 39.1539892144371 | 38.745552403895  |
|        | 45.1899271235974 | 37.6383530120621 | 38.5668610487033 | 38.6454098044474 |
| AQP6   | 44.7520317855773 | 45.1390218677367 | 44.014441886238  | 40.9141850646578 |
|        | 49.7235523248653 | 43.3269087731399 | 46.0228732507872 | 49.8344973836834 |
|        | 49.3780606970538 | 49.5635427311883 | 46.1673159982664 | 46.917149434588  |

|         |                  |                  |                  |                  |
|---------|------------------|------------------|------------------|------------------|
| AQP7    | 39.4710743516517 | 39.2907645923217 | 44.3344900481112 | 39.2780515621926 |
|         | 40.5710637884029 | 39.2985791324641 | 40.4359177791566 | 44.293922970134  |
|         | 42.357910063876  | 55.4037482627222 | 51.7538628098347 | 48.5123041297835 |
| AQP7P2  | 40.4133123405898 | 42.7240538244549 | 41.7419877611072 |                  |
|         | 43.9282059368202 | 38.9856269395186 | 43.8427403434964 | 39.0894172982439 |
|         | 49.6769349856548 | 38.2981083038519 | 71.5484567134601 | 67.0078363401212 |
|         | 63.6254894053045 |                  |                  |                  |
| AQP8    | 35.3227485563945 | 41.0678614026819 | 33.6816578730693 | 40.0698728584484 |
|         | 42.0709558258414 | 41.0582900711341 | 36.8369172900902 | 51.555506218204  |
|         | 41.4636047919453 | 38.528621456378  | 40.2649309204478 | 37.6557714476853 |
| AQP9    | 135.106756607914 | 58.1027665533767 | 114.039396407323 | 3021.24285327836 |
|         | 85.2849531543957 | 171.597378768542 | 371.393488010768 | 68.2309359831273 |
|         | 40.9901805728485 | 42.6793753550854 | 56.1379957867124 | 58.7382738968248 |
| AQR     | 133.541341560868 | 123.841740274811 | 92.0606634977068 | 130.02102880365  |
|         | 155.378768637562 | 138.486962379511 | 128.766242896259 | 122.23209417744  |
|         | 138.618449365819 | 132.242070552057 | 125.027865666372 | 118.115557136662 |
| AR      | 35.8758508994673 | 45.7589758958741 | 46.4569566520107 | 43.074472921841  |
|         | 41.8407088454059 | 40.3840175122961 | 58.037539503209  | 45.0478115350159 |
|         | 45.2448074369659 | 41.9219580093938 | 46.9893284247299 | 48.9155368657318 |
| ARAF    | 179.756604242873 | 203.373397813051 | 279.485290822376 | 190.960237766104 |
|         | 151.99110418225  | 173.745808259419 | 204.251854342995 | 218.868344683409 |
|         | 252.134800295199 | 234.333935191237 | 236.139267415604 | 193.395549316561 |
| ARC     | 43.5710871617107 | 53.8499082625091 | 43.9450023643394 | 48.1662933382789 |
|         | 43.7517118200398 | 43.8582747295766 | 44.9863726205428 | 47.4740726032707 |
|         | 40.4997186069494 | 41.4397539024976 | 43.5710871617107 | 49.5539622682049 |
| ARCN1   | 650.328627263899 | 688.168272082335 | 641.103199748891 | 484.567462838523 |
|         | 731.071171171638 | 637.565156571985 | 504.281506941044 | 490.301992866742 |
|         | 472.159979716705 | 414.17770012536  | 500.794458547464 | 651.078746026341 |
| ARD1A   | 161.109600577001 | 197.720854621428 | 220.573371581491 | 195.893183546434 |
|         | 457.860665614779 | 215.68113524702  | 205.627744150936 | 177.535502927617 |
|         | 262.37779288036  | 154.355197155161 | 157.7623351008   | 171.899182876869 |
| AREG    | 40.7609952437622 | 37.1685072112618 | 38.9790184198145 | 39.3750969348308 |
|         | 38.8456942580061 | 38.1169703906207 | 35.9894133432376 | 44.6107027295193 |
|         | 44.7058233759912 | 39.4710743516517 | 42.0750889188255 | 43.0930293831497 |
| ARF1    | 448.196293409768 | 573.832332097619 | 577.276184555955 | 564.468049419762 |
|         | 557.455966274117 | 488.089090043145 | 667.837116137964 | 368.005081137665 |
|         | 550.861615347663 | 395.875593488613 | 530.314249832491 | 396.63268714181  |
| ARF3    | 320.684862879691 | 232.113067048781 | 279.901217752341 | 209.004669589169 |
|         | 277.837785971587 | 227.739219647972 | 201.800572658224 | 317.406465928295 |
|         | 273.108672916862 | 235.33716196909  | 260.15500351311  | 266.581466060604 |
| ARF4    | 634.226367147025 | 665.122091380755 | 524.972936438175 | 806.827205415602 |
|         | 708.839262759372 | 714.075528895169 | 550.642253702646 | 422.931891494195 |
|         | 492.324859107777 | 309.593721653575 | 355.7118155732   | 645.408557927175 |
| ARF5    | 748.913487947791 | 551.490493022416 | 653.880422442079 | 534.292112344761 |
|         | 452.351360652434 | 411.254448823371 | 623.574706535278 | 597.593714375156 |
|         | 1031.4414268329  | 799.399983719702 | 683.75696650704  | 440.282299601096 |
| ARF6    | 29.745266251498  | 38.3322849790657 | 39.9101908547397 | 40.3180310664156 |
|         | 37.8679241954337 | 40.5281496800812 | 43.8206425661746 | 36.8400213077707 |
|         | 39.1790517315259 | 45.5776159432079 | 40.3452320167286 | 40.0557788909923 |
| ARFGAP1 | 266.985013788569 | 124.064628168507 | 132.84476910529  |                  |
|         | 170.462982145147 | 166.488589768213 | 104.687705245581 | 168.145003400654 |
|         | 208.804071011518 | 110.909109947659 | 132.851109034738 | 149.076166432567 |
|         | 96.8141712830545 |                  |                  |                  |

ARFGAP2 90.9521112485099 125.446628066221 125.383837024985  
97.6774247176874 127.908440924429 102.020047144427 83.2162112994735  
91.9919654450652 133.64996113791 136.766779297051 147.875578127733  
86.6854406823303

ARFGAP3 230.286815921497 110.960501850409 179.581456201363  
358.30596676183 99.9841766494502 187.836567614419 101.250422688816  
148.458171821142 159.727829541783 90.1696131791736 125.62281563325  
190.487609390723

ARFGEF1 162.160380044249 232.553783060082 195.893183546434  
129.909461876076 150.649377863375 102.863599315528 138.027432399991  
103.631449539809 302.978457293429 151.325962700025 180.029671376384  
188.670053901101

ARFGEF2 60.1705241170421 87.6763065012524 81.961632059749  
89.2503940049313 69.493532577364 54.5952754712007 84.9182861692273  
126.620595729562 103.199200862158 72.3297091475814 67.7280831060202  
67.9850517608624

ARFIP1 69.2001494999588 92.8951148347802 79.0442418260005  
97.2865629929716 81.7765447802116 84.1922656126304 96.3563214065014  
88.4439480366515 100.654701845984 88.5601339449828 95.3145142003966  
111.874193363836

ARFIP2 35.9305494063137 35.4484652445078 33.0260566875355  
32.6817359372544 45.9104478407175 31.3901365951213 36.4098694708483  
33.0038344711883 32.396635964353 36.1550293353654 35.4386677371439  
32.4951076826876

ARFRP1 70.8288090024328 63.3667304749164 65.49167373382  
80.7168944828052 69.7413896580273 62.0660509811111 81.454335582503  
68.2309359831273 65.2881198932621 83.6524523974491 76.5505585423421  
60.8662233098324

ARG1 39.5676051939342 41.8073910693411 44.696023817801 51.0175677516029  
34.3633615460307 44.7804080899431 42.7431359850339 38.3684202018524  
43.8482802038826 49.1928206164702 38.2795150354677 41.6550823405646

ARG2 50.2203578628217 64.2621389350588 51.5292723244077 37.7469621225553  
65.8319449883221 57.0775902639215 49.540449125788 73.5950442915143  
63.6222532132037 51.5855515705917 47.6884372645373 86.9924799927707

ARG99 42.9104454767916 45.1694246393676 39.4710743516517 46.7577982595088  
44.2607789091176 53.0290605707162 45.4799270968969 42.8482181313226  
45.0997987980157 37.8217989841918 44.7926323492519 45.9693232070002

ARGFX 30.9241129241985 36.5219488315447 34.6977013306396 36.0481934423077  
35.6434124419782 34.3887641786747 38.6243997507646 37.2237132058632  
36.5393857306744 35.8304004211528 33.1645364749371 37.6557714476853

ARGFXP2 38.5007204246293 37.4772922422734 43.4544762830742  
41.9620007529243 40.2449343247539 44.812853905056 41.3094485574845  
39.3709357615493 42.2577689927563 42.2313175006715 39.7576136507593  
39.4490233720848

ARGLU1 798.515089763944 843.333981146512 1014.6400720037  
591.192020333181 1123.99110499679 721.887210480162 868.899376368472  
725.680256063016 657.031980628955 1163.0370991733 962.079396754147  
823.933615182634

ARHGAP1 643.9329225331 782.639346040155 1125.31394383117  
388.831358461844 460.162024551004 965.530928317269 335.249352041342  
306.895449954881 675.832363405287 1171.207937488 1058.61208471961  
806.827205415602

ARHGAP10 91.4786089554886 148.879760620316 129.609377870182  
126.14245679817 134.981483569602 379.098697147575 197.895987726243

183.469819903584 166.834334710682 412.880824530845 492.519023728038  
271.275703732022  
ARHGAP11A 56.3947991135032 53.4336038235373 53.1124375923907  
67.2714646016644 57.4163094213712 47.8636003588181 57.7805922926828  
47.4740726032707 59.1716224344299 48.1392888470269 49.2206713037152  
53.1182952086284  
ARHGAP11B 37.4554876386402 49.6203214143464 53.3127618245672  
42.6913548400127 79.9161139112432 37.8102105794655 37.7136011474903  
42.0494116081998 43.5669306063196 41.2276963324981 43.7585538437696  
43.5738557773903  
ARHGAP12 53.0290605707162 58.9128486419884 55.0280380566685  
46.3203995372658 49.1263312877155 56.6871913719063 51.5967098638347  
53.5271601314404 75.4572860692649 62.2025996860055 62.7743500747415  
81.8983491901699  
ARHGAP15 77.9057333780847 109.654559065946 114.979124960177  
473.223156200183 61.8471691369569 166.910579215196 89.2913927776683  
355.319959025243 50.5785738734431 77.268323196327 69.4877749654481  
64.7963220317334  
ARHGAP17 134.743068051122 116.882934971483 141.942507674009  
171.468580016846 165.349426587915 132.144567805599 110.223625398261  
171.829798001437 101.81885073944 120.980558571109 111.071209057746  
105.05842887748  
ARHGAP18 44.436995101921 45.9266745571724 41.785676764591  
65.7321440516177 37.7576900881741 37.9951997351435 43.9450023643394  
51.0724630072723 40.2274522635576 44.8997235283254 40.2649309204478  
43.1805016690297  
ARHGAP19 66.5500089527674 141.055218279065 96.6895594961001  
146.268519891864 111.501058276821 97.152024864444 113.866742186841  
76.8393340617473 74.5694657001572 122.702789229752 118.316810638061  
105.515662220161  
ARHGAP20 58.4920021605316 40.7952353240579 38.7745734037492  
54.8412943008635 44.6834648302383 88.8760662992208 42.9803717121865  
40.7311497914871 53.838484549134 70.8749669449099 61.7191344476295  
55.6351010690528  
ARHGAP21 430.868309653765 225.918246061369 156.008696165877  
330.737070535671 368.913147706435 487.261132702908 346.200944964577  
538.716947884528 369.451882513347 670.958499409833 373.399443929227  
507.620619345969  
ARHGAP22 70.3757673501097 57.6831182451733 69.0503036666628  
104.99788782377 62.8270556619309 67.4846787600629 48.9826868640753  
43.6434576713809 56.7991853808475 73.2445837559745 65.8220821345163  
56.0477607422828  
ARHGAP23 146.543232229227 417.4609354305 663.904584382358  
97.1271615802556 670.958499409833 190.27040993548 475.621740714165  
265.026710493466 477.741319532507 376.289659542649 274.887090359131  
394.437597863822  
ARHGAP24 57.2364979699541 50.7774722329703 52.5799250974039  
61.6395445916212 48.3182672138682 99.9619062444102 40.4359177791566  
43.7396619462033 41.0375488957099 56.045633409935 56.0183341691645  
56.4750145384091  
ARHGAP25 52.6631075917563 55.012605207172 56.2937283136959  
182.06733830953 45.8051846088552 53.3185097662527 44.2688720583707  
47.9269108813022 45.1899271235974 60.5548506034677 58.9941076318768  
51.1055541075029



ARHGAP26 54.0170817319522 44.9370339275041 78.7103847663605  
75.4466520363487 42.4864576619427 51.1621379498014 46.3057385979341  
56.5914743235484 54.1745577382276 76.3583555666815 75.6883778954949  
54.9919060580109

ARHGAP27 43.4626049853157 42.9358255168086 47.0055981216687  
48.4916117779992 45.8051846088552 41.554942319225 42.4939802311136  
43.4544762830742 48.7358147030082 41.2276963324981 47.5439485437351  
50.3118072462443

ARHGAP28 50.9836157087562 44.8935103222402 42.3536549114165  
40.0322420615846 54.7447380922582 43.9366081640576 38.0598374201407  
51.6159542017038 46.2718838939055 47.9056710878325 55.0823430906161  
44.9734311311394

ARHGAP29 43.2724556187214 37.920964499903 40.1985790927248  
43.8002456102021 44.147557390293 38.4330755397458 40.3302268293707  
41.0381860307445 44.7058233759912 36.1550293353654 41.2598458726002  
40.9683275553869

ARHGAP30 94.4999269932618 113.417671029461 96.7948977485109  
286.11425202743 64.2551943403496 104.305801811472 89.3680268066234  
120.660602388292 83.616030092144 59.8916740212935 69.1641374421455  
62.046151104685

ARHGAP4 133.229859346689 266.9457657143 150.114520857436  
326.055799445169 291.232601825013 164.097531361519 116.74427460886  
220.054040993848 56.7991853808475 77.3367966395554 107.154549409927  
66.6118713143653

ARHGAP5 48.7646976789783 34.7135536792489 43.3085358214154  
46.4555908533915 36.4434672195785 46.3715909653832 45.223075311113  
38.5457716679071 46.0106098064475 47.611018474151 49.0361180089431  
47.3992733452821

ARHGAP6 37.0320432433314 39.1539892144371 39.5185194094434  
38.9534635879195 38.5512429290626 43.3785777889265 45.4040191352687  
41.8417024632349 41.3487726034097 40.45773165894 40.2298112543679  
41.2437378488025

ARHGAP8 55.8579198774476 46.4555908533915 53.5698357689852  
41.5937402943136 72.2665537421443 42.4580504587581 49.540449125788  
45.3530683538086 46.4164127487052 40.3235655331796 43.6629145624937  
43.0456011922275

ARHGAP9 65.5029051840465 125.768826615813 96.213791081731  
454.701322158431 59.526516100518 95.9391851122771 104.573463811298  
75.4272782742534 47.945438269111 51.173096357454 64.3032703931013  
49.1855323567224

ARHGDIA 563.750309421406 619.950241162173 502.67939538729  
565.72800641089 500.431738940003 464.99944459917 768.354209323884  
565.72800641089 537.841677481011 552.480471244789 651.969296681551  
432.001201940414

ARHGDIB 2013.08489754172 2844.5506310828 3217.83121827744  
4784.36905964712 2067.66516256598 1829.30985071028 3681.41904661708  
3099.21690111993 3690.00752647453 2225.65559724391 1789.07186722972  
2150.8715161597

ARHGDIG 50.379587451669 44.3187284857534 41.1367478979484  
40.8084239472012 42.9090346219023 42.0016830644258 48.8319884367456  
43.6434576713809 42.846832824953 43.401782064778 41.0476065156912  
44.5432192783161

ARHGEF1 56.4729864553319 60.9987978554263 65.3843877368233  
79.6770200338268 59.9749158217504 53.2775641275138 56.9320717885002

64.6566383383512 64.5875183163009 59.5785089386245 65.342842101283  
55.1037284831588  
ARHGFEF10 213.028412890553 160.868571611805 244.907057340556  
189.137593177772 210.282066967005 368.005081137665 43.1931731665131  
127.213248611204 93.5665536754775 258.079468517805 279.632025097952  
215.175765091556  
ARHGFEF10L 44.9896851005259 43.4396866157171 48.8584917918986  
43.3744503319109 40.7779767565889 42.6575535390785 44.0687697278114  
47.6361499000296 48.9614101792105 47.0627306565247 50.8276808181086  
47.1060577218993  
ARHGFEF11 62.4317959077388 57.2871072823547 66.4079972657486  
65.3191216270241 71.5345397102823 58.7404123614695 60.0601788842942  
58.3608287133675 59.3580517977711 57.0248378289195 57.5430365699386  
60.1555629233618  
ARHGFEF12 67.8774399765179 67.9697948557876 79.0962508551502  
50.2163892855092 63.4753448572245 111.009050621499 71.9474405671289  
69.1973371867031 78.5174639327946 163.788056447509 108.512469038407  
131.645714321903  
ARHGFEF15 36.5393857306744 41.8073910693411 42.9104454767916  
36.264823544143 36.5393857306744 42.0574848021044 41.706879587091  
37.33030683349 42.6366765186182 35.93950183586 49.3901004211918  
42.0424641526302  
ARHGFEF16 61.5882375235292 60.0601788842942 61.2153068100932  
34.9221408381038 59.3611824459962 34.3887641786747 54.1707158323527  
51.8347877274018 71.3932787152381 66.0224755625662 66.0282565447846  
75.3271272345679  
ARHGFEF17 93.9756797434207 60.808065997635 75.9174504780598  
68.1992221684165 70.2565873027242 108.961145389101 51.4349390827895  
62.105802634526 44.8997235283254 84.4349803529132 80.9821967801845  
65.524821699432  
ARHGFEF18 414.539381761279 810.021622878441 1117.26060212107  
429.983084929605 927.61341837276 362.268767190535 486.911782180966  
461.394007153992 590.709061039001 735.60603239712 660.295993198711  
628.403814060213  
ARHGFEF19 163.280931300437 188.13862794196 208.189151365575  
71.2572485987604 423.804472820231 95.5022104475922 306.391154574276  
217.78290286894 291.086512261106 201.301705082976 129.091447141381  
120.090807153941  
ARHGFEF2 452.351360652434 372.525928228911 563.573152902421  
637.035929429013 292.389429869034 416.149496747947 372.421330252979  
330.814531248695 162.106596527489 347.196922795214 302.978457293429  
407.949645788215  
ARHGFEF3 254.280873627155 205.449627031002 274.493399403322  
557.979646421047 195.340273658052 337.51861578231 206.514263103112  
296.080833914967 267.565744773928 648.885062676884 567.675954219815  
524.972936438175  
ARHGFEF4 46.8954576545929 48.1627097465883 40.931294690669  
38.745552403895 51.940083408061 61.2387559102636 41.1886975241176  
49.7309743973184 47.9035532886869 48.1829653238565 60.8201366212589  
50.7975577422986  
ARHGFEF5 87.8746766762445 106.595042669127 103.43536623122  
63.6334154351075 93.9708162269401 59.4949177415847 74.7534423194688  
63.0748373122119 121.142787642824 109.432338567044 76.111908977613  
92.9600461444587

ARHGEF6 189.737472782071 428.729935028911 337.013669560645  
593.345148568451 146.840603547323 535.313561995599 210.880198736298  
229.47693624489 337.627557996504 521.874349042344 500.549865625701  
393.464673405634  
ARHGEF7 123.433224929087 118.044483475719 129.2860308084  
112.469702446962 121.737071786167 94.5261917871909 166.717256080341  
128.908350338087 106.70211644918 135.377859777529 134.884412058457  
121.851515410237  
ARHGEF9 49.9419897484381 47.4076235350059 47.646800205189  
39.7411455670172 44.0451487108213 71.5249259772583 47.4439407315335  
43.844855336215 42.0621425894624 63.7836577144372 58.8188963227059  
58.0218262176065  
ARID1A 174.559216176175 238.510952165358 280.563427715895  
207.741669973713 389.481124074714 194.435776102991 282.764445883135  
310.461601607662 311.055487966495 257.325282051981 241.24267509333  
218.819478568299  
ARID1B 41.3785995857154 46.8954576545929 38.0958223740111  
45.6706505553383 45.7452456977857 43.2312848495114 45.1694246393676  
42.0494116081998 43.8482802038826 44.571915452417 45.9725715538987  
40.1700117452801  
ARID2 72.1066584199167 72.8472187581193 60.2528550551807 63.5195937348531  
57.8715555065641 74.8170892324966 72.2099571536717 56.6341453289967  
98.9113424606303 68.1674425673171 67.495246759946 74.2180011215707  
ARID3A 418.01691355558 222.617854741466 88.9928368134295  
265.667557678228 334.813163079302 106.951862149262 96.2959923858457  
305.684635013927 79.1074681877535 99.3956523785983 101.634888749356  
112.316483867372  
ARID3B 84.7642634532073 279.448591201269 96.7948977485109  
163.995560004001 233.539376791695 95.6783002876222 107.325456368022  
108.838406710326 101.01459505339 74.1228645930185 78.3542840447759  
89.0727613846343  
ARID3C 43.3638918705225 42.5269793679335 42.4580504587581  
40.4359177791566 42.4864576619427 39.4953494583071 43.1931731665131  
37.9837233601316 47.798305839406 40.6022003765153 41.8168470823451  
46.6397391251762  
ARID4A 46.6862836031114 57.0504111569238 66.9665871090772  
59.5573227689649 52.0042367882776 68.009873198833 48.2748123114598  
52.1788489555942 60.5608545741456 50.9673994772567 56.0642694832108  
67.6983931011126  
ARID4B 72.613397507717 97.2316181542823 91.6713614282714  
158.225884127529 84.7275805640731 94.4999269932618 94.8260360398356  
119.088986733238 75.5681913475287 80.8593396441328 96.0539709962851  
102.49785018292  
ARID5A 47.6153629331146 44.6402215707065 45.1846041469628  
55.9692669442536 48.9980022280763 64.388373296782 41.5421429082231  
42.4864576619427 42.5743069255835 44.8522313252892 48.5848226464449  
45.338588656043  
ARID5B 1630.25992078321 457.202737754842 332.933704863586  
624.097858948785 410.808988840343 889.638287212686 166.009268520425  
396.167219131922 746.847753035399 452.351360652434 530.710127703061  
706.087945508248  
ARIH1 102.655050997714 88.0720840588632 68.6095266659765 125.934747056908  
115.132600341395 106.186051982612 122.316617618658 138.55578310538  
98.9712341137316 84.2960453806012 96.4278951689874 134.869029698594

|         |                  |                  |                  |                  |
|---------|------------------|------------------|------------------|------------------|
| ARIH2   | 179.756604242873 | 246.20973320244  | 289.909646207746 | 269.284584971871 |
|         | 312.245547906683 | 293.086409068972 | 235.222472959869 | 129.810477623628 |
|         | 289.625425434103 | 412.29192088057  | 291.596692248591 | 274.994470779348 |
| ARL1    | 254.280873627155 | 576.140066807763 | 447.448900931272 | 268.745928429069 |
|         | 309.293546994308 | 705.283979182062 | 324.936044300546 | 264.495576211074 |
|         | 356.565801074289 | 461.123856163975 | 559.9670724278   | 421.971171686029 |
| ARL10   | 46.6348258763289 | 43.4396866157171 | 38.7745734037492 | 40.4359177791566 |
|         | 43.1252272136667 | 40.7616966228404 | 41.1507980856436 | 41.1575777497576 |
|         | 35.6139301508335 | 42.8936990772838 | 43.0971787292711 | 42.1537476443423 |
| ARL11   | 41.2424637338424 | 41.9894412416874 | 37.4642807402741 | 39.853175885492  |
|         | 39.859345745831  | 40.040778349137  | 48.1747307200218 | 38.956280281655  |
|         | 37.7384958256497 | 39.4710743516517 | 40.1742127891824 | 39.0536056496869 |
| ARL13A  | 38.8561375693335 | 41.8073910693411 | 42.4580504587581 |                  |
|         | 46.8954576545929 | 39.2608760193011 | 39.4953494583071 | 40.4359177791566 |
|         | 38.1835938174625 | 45.5779686360641 | 45.2556760873335 | 42.8263096141654 |
|         | 37.9607839934735 |                  |                  |                  |
| ARL13B  | 41.1523487516364 | 40.4359177791566 | 40.439898672334  |                  |
|         | 39.853175885492  | 43.2907292669418 | 37.1894304543751 | 36.08956004634   |
|         | 37.3875631460917 | 39.4762546236449 | 40.3235655331796 | 39.3667161654772 |
|         | 44.2527566343661 |                  |                  |                  |
| ARL14   | 155.928417606775 | 195.968119243879 | 87.3634135323569 | 67.7121534934164 |
|         | 77.9085946827079 | 50.3245489035833 | 51.7714254834195 | 228.907776306695 |
|         | 92.3388129097482 | 167.578081645481 | 130.048910817957 | 88.3636380348802 |
| ARL15   | 49.4786466722535 | 48.551327455445  | 49.7827734675743 | 52.9156540211793 |
|         | 48.0234896130991 | 49.8472708021525 | 43.6025443656008 | 50.7364620410977 |
|         | 50.1603795873336 | 49.1928206164702 | 50.0564735608363 | 52.0359304386476 |
| ARL16   | 511.792908607692 | 315.186937216422 | 356.079406408042 | 411.981987305512 |
|         | 294.090159716249 | 267.107863045114 | 412.694325761831 | 828.403901345618 |
|         | 291.232601825013 | 515.856807472321 | 813.242005949542 | 675.079525434102 |
| ARL17P1 | 61.7551416187554 | 98.0023132593711 | 66.0411740221276 |                  |
|         | 117.699959435983 | 161.890859629246 | 55.1987351219665 | 65.644767142472  |
|         | 79.9597944271831 | 61.8824218975538 | 87.9871827215149 | 67.0361353184222 |
|         | 147.137598111239 |                  |                  |                  |
| ARL2    | 519.563402444472 | 421.146145642412 | 406.104588997462 | 348.551545320445 |
|         | 935.815928529014 | 925.486088550061 | 783.440408023061 | 448.508714709248 |
|         | 410.329983506955 | 900.517711546397 | 855.602941621804 | 818.290793784784 |
| ARL2BP  | 472.982369155078 | 380.541502795438 | 448.290058854438 |                  |
|         | 400.973553604192 | 441.247306467645 | 527.037018015766 | 333.122044191102 |
|         | 269.857104259782 | 418.927102569912 | 433.194113859912 | 392.622487173359 |
|         | 410.716248834784 |                  |                  |                  |
| ARL3    | 56.2508140932179 | 65.5367689605146 | 47.7737810047679 | 46.614092935749  |
|         | 56.2305155589239 | 101.693848821246 | 61.6544855697851 | 54.3820590274321 |
|         | 56.6079099547057 | 75.0665411373616 | 74.7669841575348 | 71.5327770882433 |
| ARL4A   | 55.4590083528414 | 48.2220547806679 | 56.2843540044585 | 90.6347108049639 |
|         | 48.7664156229426 | 63.2804984998739 | 46.6318564520584 | 47.4740726032707 |
|         | 57.8772482723463 | 61.3919023984003 | 54.9765783642973 | 61.5300817099814 |
| ARL4C   | 55.5276281380084 | 40.148780650831  | 38.6005272730664 | 66.4047895961325 |
|         | 40.148780650831  | 47.0027453663546 | 44.2166118829877 | 40.3357777530419 |
|         | 45.4799270968969 | 45.7911932481722 | 47.8284278211109 | 45.4799270968969 |
| ARL4D   | 51.1740855632044 | 49.9085372049438 | 69.11736279512   | 40.9607305725196 |
|         | 62.046151104685  | 62.7515429046888 | 44.8643898647322 | 58.2043532960091 |
|         | 82.1974756449763 | 81.915829566737  | 79.8701900696361 | 67.0331844416938 |

|         |                  |                  |                  |                  |
|---------|------------------|------------------|------------------|------------------|
| ARL5A   | 329.763197973922 | 405.148979342648 | 322.509777895373 | 546.80979198725  |
|         | 439.955651727755 | 521.029507993615 | 320.038347979923 | 453.652548085387 |
|         | 211.596652798395 | 581.396808977873 | 532.981045084589 | 572.968592371501 |
| ARL5B   | 65.2295773603116 | 67.3779879510397 | 67.235655687817  | 155.564141715819 |
|         | 66.5187917407182 | 66.4568741702152 | 102.711934290382 | 92.227126770051  |
|         | 71.7408778060956 | 48.9826868640753 | 51.0013344286851 | 60.4872675915085 |
| ARL5C   | 44.7044140979108 | 43.683792219729  | 41.785676764591  | 40.646702696033  |
|         | 42.9090346219023 | 45.0882356578404 | 43.6753843488695 | 40.3357777530419 |
|         | 40.4220196471124 | 40.8049408996274 | 44.4688999098904 | 41.863927676552  |
| ARL6    | 38.0089018744739 | 40.0527893189096 | 39.5118967430322 | 44.3440839686558 |
|         | 40.6251465440216 | 36.2376693877628 | 36.7800683777849 | 39.9576138799997 |
|         | 41.0476065156912 | 39.6719190054379 | 40.7786237231186 | 39.6682560919759 |
| ARL6IP1 | 727.788854407888 | 1221.31634960736 | 917.179747195874 |                  |
|         | 583.690350347288 | 795.381998233245 | 548.815225941887 | 1245.45371155527 |
|         | 904.122237964854 | 1606.26712101449 | 785.79878416775  | 722.514380928291 |
|         | 854.712488657987 |                  |                  |                  |
| ARL6IP4 | 84.4349803529132 | 78.8741966117641 | 88.2959958615748 |                  |
|         | 81.2269477373795 | 80.3768086728545 | 105.621640443267 | 104.504444994123 |
|         | 82.2266112813039 | 100.499763255098 | 111.703187941409 | 115.016486106706 |
|         | 91.2330127140591 |                  |                  |                  |
| ARL6IP5 | 583.915973546284 | 622.699896083816 | 675.832363405287 |                  |
|         | 1031.4414268329  | 317.835330028579 | 786.57695312967  | 266.717224821545 |
|         | 403.428042132639 | 595.012422454829 | 1430.73068989193 | 1069.3975598703  |
|         | 1023.81381775221 |                  |                  |                  |
| ARL6IP6 | 82.6246523811721 | 145.607100979838 | 152.555556133364 |                  |
|         | 107.413918714848 | 104.840865638204 | 78.1952428431942 | 102.457537266105 |
|         | 65.9476039189301 | 109.005343769033 | 68.1040271620925 | 87.036020750455  |
|         | 136.081259669601 |                  |                  |                  |
| ARL8A   | 40.3478825593224 | 37.4540772310118 | 38.3166554965434 | 41.7614975630362 |
|         | 41.6806984441849 | 39.0266821712099 | 39.1539892144371 | 40.6171774724171 |
|         | 42.7150227340364 | 40.8049408996274 | 39.5399188536544 | 37.8490162439785 |
| ARL8B   | 296.664472126617 | 246.313146942736 | 255.915599666591 | 308.280127837858 |
|         | 233.539376791695 | 266.178061771978 | 208.7739716139   | 366.326747630465 |
|         | 301.941928552396 | 322.509777895373 | 345.876877384089 | 375.354746298695 |
| ARL9    | 45.5758521267508 | 93.6717518147993 | 45.989212296035  | 43.074472921841  |
|         | 145.972133104142 | 66.8632294055679 | 151.135296427249 | 89.7184505543918 |
|         | 69.4009439491061 | 47.7180816682562 | 43.3085358214154 | 42.1537476443423 |
| ARMC1   | 158.862722884436 | 181.844123841452 | 117.689172019617 | 134.394743648475 |
|         | 171.073367662623 | 193.262615637464 | 155.018308238778 | 156.220155161711 |
|         | 145.676955166566 | 148.570371099987 | 164.847648206552 | 148.944852825695 |
| ARMC10  | 241.175454742029 | 273.320144423733 | 352.600793906035 |                  |
|         | 186.477689350702 | 294.966924715506 | 270.947794977829 | 183.2003374677   |
|         | 194.951677338012 | 277.588692595406 | 100.499763255098 | 135.757061334489 |
|         | 232.911951245618 |                  |                  |                  |
| ARMC2   | 42.1537476443423 | 41.554942319225  | 39.6833800000587 | 43.0016969050339 |
|         | 42.551356054931  | 40.8634043028528 | 39.3585350448719 | 46.695848687694  |
|         | 38.7578265341627 | 38.9207612933107 | 42.0750889188255 | 44.5432192783161 |
| ARMC4   | 39.5676051939342 | 39.9697332660833 | 38.7745734037492 | 33.6816578730693 |
|         | 40.5710637884029 | 70.1074782747874 | 36.5352572191451 | 46.1673159982664 |
|         | 35.0305278582179 | 33.4316681623175 | 40.8225507267584 | 45.0985088502363 |
| ARMC5   | 44.9896851005259 | 56.9312835667828 | 47.2055133646385 | 43.1847628331565 |
|         | 33.0463640202858 | 51.1621379498014 | 38.7337086062875 | 52.1788489555942 |
|         | 44.4395580493118 | 46.1390887492649 | 59.1443775199516 | 43.2776458914333 |

ARMC6 59.046385957117 72.4325984501758 78.8357122967692 62.3936376596431  
143.773311381452 76.7063975550116 82.1144251872199 87.799979434508  
96.5175130622216 92.563449632567 76.9454624478854 70.9377012403023  
ARMC7 104.232196493024 113.669790961194 137.294289316915 135.669367786875  
115.408418935236 75.7502062965698 146.117756310709 188.567635000971  
209.524518082089 259.812381486915 214.562221385406 157.856158440506  
ARMC8 57.1046180136491 62.0008474085033 74.2122914028677 62.2878942799819  
76.6160788176402 97.8052968915826 68.5174271063894 62.6100476086964  
66.9119713241466 54.691568065544 59.5612330871274 66.7256057011273  
ARMC9 44.436995101921 36.0366673493555 41.1367478979484 37.9875302985336  
38.745552403895 48.6621527194963 37.4772922422734 39.4710743516517  
38.4344387289956 37.1275334308172 42.2618615571566 42.1537476443423  
ARMCX1 79.3889841821749 201.360008430353 63.2475738480323  
86.2488614616838 50.2953638261991 268.54298415337 124.687212034276  
89.19837608959 64.4837166864084 99.4546022538476 111.803238196297  
113.692418102755  
ARMCX2 131.277614500948 189.47090669378 160.733526836282  
116.122324921267 311.502922515027 210.958578914607 245.691073028699  
75.5830548489892 187.733278812798 224.480311257437 227.791956085471  
294.567137562864  
ARMCX3 70.8667493706048 67.222434502867 57.3697604614404  
58.4476706144086 66.9340967279385 89.4380336458796 58.9656737189764  
55.2412344988347 62.1796792097014 55.2214187655851 62.0946663000834  
77.3260618801358  
ARMCX4 49.8472708021525 64.6970918899831 53.0630927250439  
42.8235313007746 57.4163094213712 46.1513019317765 69.6301237585571  
48.7814131120945 41.7627910693483 103.385447205588 62.8408273986904  
57.2350830635912  
ARMCX5 58.0139597055449 79.271901834289 60.7530213660442  
67.1961800572759 66.4047895961325 57.678188678075 71.5249259772583  
77.7615826856723 80.6434122355417 73.7133884699889 84.7058085717914  
75.7991766454243  
ARMCX6 83.877343750194 134.817234321847 145.405415337402  
98.1433318215702 111.096799408676 87.6018870099686 110.422857502267  
123.618276821013 111.153589230866 104.288073521816 86.4195039096886  
99.4546022538476  
ARMET 1180.7204565402 1789.07186722972 1578.32969650385 1749.06320703181  
2032.18819581205 838.974043046676 1618.92099084622 892.323580265478  
1282.9181829891 562.394906600222 637.035929429013 965.530928317269  
ARMETL1 39.6609238036815 45.4882438975269 51.0539624358342  
47.2009420656854 48.9627346956003 39.2985791324641 43.6753843488695  
47.2009420656854 47.7086093893038 46.441301934328 48.7502645382856  
42.8864415494484  
ARNT 42.2618615571566 42.6450179841129 44.7255207589606 35.49696651597  
41.6340461942423 45.0283997415478 37.8877750141557 39.8965727231863  
43.3262148375525 46.7182294568603 48.3570240922825 50.0159415986047  
ARNT2 54.1745577382276 52.7493349111555 34.4716904283753 41.0726336841311  
47.4548471240051 82.5956705829173 79.1432909353319 112.021971795593  
46.3203995372658 60.6266092582071 70.9319024596628 55.5712957590038  
ARNTL 70.2541961995753 59.4253780950488 57.5666238219027 93.5358142196619  
50.0580547772867 70.380703483689 46.4388841354122 50.1833483241864  
57.8772482723463 56.3441077510744 53.8441980932644 83.0460206754856  
ARNTL2 40.9558083259517 35.9305494063137 36.1042012504758  
40.9607305725196 35.7973685350741 39.4953494583071 35.1307934330047

38.745552403895 33.6902293666089 37.0320432433314 37.2892641289258  
 41.6550823405646  
 ARPC1A 1161.71671016964 908.328776521114 1052.16097214718  
 519.775555680262 1117.26060212107 851.108027634251 922.047328788961  
 949.923102632043 1107.96086673001 778.723771259404 898.114119553014  
 752.837247653926  
 ARPC1B 311.739149980904 303.458085392002 274.259417498569  
 459.021889198824 191.298525555624 198.324467851365 212.187855950414  
 130.62791061956 266.07996221256 60.4837400912239 82.9256976863272  
 124.18058128276  
 ARPC2 868.899376368472 1418.94307844471 1425.37639004849 1604.80031304031  
 976.566026758227 955.088515235485 1149.02954135912 640.78586776574  
 1137.99307039386 851.108027634251 989.0602710707 1199.29782389306  
 ARPC3 2096.51999792183 2313.21212353993 2559.659041589 2951.88559311416  
 1864.63057767867 1453.77801653969 2138.23653387331 1174.92419086759  
 1939.66920192372 708.005870621064 766.027617496754 1664.00821059181  
 ARPC4 379.473739290565 611.538630852232 469.30167430316 516.076634990003  
 421.013324906569 376.749116251503 460.162024551004 506.75912743556  
 444.618035487523 233.263058459431 350.451704069255 310.188313944313  
 ARPC5 736.846933148564 625.435083064752 804.592753722875 1291.71781703042  
 387.749285019292 414.794323433931 802.650020720921 504.676944739425  
 571.170643523692 515.409979010663 384.919835924792 659.396637478356  
 ARPC5L 657.936229435025 713.685405035516 312.015358620043  
 345.811673759417 450.271658272512 276.321098534247 877.673009984357  
 610.149769483374 483.416873464931 289.112248695929 319.248898194029  
 341.020604260602  
 ARPM1 42.7150227340364 40.7952353240579 50.6004078448405 39.5050383901884  
 39.6535880152834 44.3648993568405 47.1345949868029 40.5158867964016  
 44.1519466943185 45.1569741609597 48.9754340235127 38.6454098044474  
 ARPM2 43.1805016690297 40.2493681589104 40.7620472083159 40.9607305725196  
 39.859345745831 41.554942319225 39.2533668167483 41.0381860307445  
 43.1805016690297 38.4187686307607 39.7342718293432 41.4508241771315  
 ARPP-19 92.5903918620825 150.875092086496 96.143327683221  
 130.02102880365 134.554839076558 198.54718783437 157.843337785472  
 117.948047796034 155.795095438102 168.897476166126 146.311363191836  
 178.789064142469  
 ARPP-21 39.4355966872342 38.5252456306656 47.8241765062483  
 38.0334163721268 37.7088333099214 38.6773650691783 38.6558726824244  
 36.9865203259851 40.2274522635576 39.5637454855233 36.3390947880186  
 40.3691324547049  
 ARR3 34.6977013306396 40.716553247236 39.2707964550441 40.0698728584484  
 45.1137938810047 40.7616966228404 41.706879587091 38.956280281655  
 38.5252456306656 42.0621425894624 39.6403089864678 43.3744503319109  
 ARRB1 93.787204465284 82.9449579428926 70.2141759405882 126.485649460666  
 70.18594926052 129.565589054551 212.530138323284 241.706783147271  
 67.3230935444252 116.530589514041 139.49198349194 90.1430468048409  
 ARRB2 43.9518547354262 45.2556760873335 44.014441886238 96.9944911507111  
 46.4343327861696 50.8533737532786 47.209353240759 48.7039705048129  
 40.8420925848403 44.571915452417 40.2649309204478 40.8681871019812  
 ARDC1 87.6178717341967 99.7361599442168 71.3527183280827  
 61.0845101400379 62.9553576299033 47.2009420656854 89.6056978251991  
 74.8893925448138 70.8606919488782 74.1228645930185 73.4853298204744  
 70.6903168772326

ARRDC2 54.6738135880328 69.4347592040783 90.500550952567  
136.644759501653 71.7263663921367 60.4065050472082 40.7340599105623  
63.9851732498913 59.9770720847728 71.4183281327686 69.9214859673839  
57.0178321687063  
ARRDC3 73.0970339739187 67.3269632644926 85.33395043174  
77.9028721785469 73.7741438283854 83.2925226467532 70.1845639720491  
59.6291051806275 90.8109585999257 55.0016608333828 59.9682734755814  
68.0751111916102  
ARRDC4 66.3095900379311 59.7406133873058 50.6004078448405  
73.4788569136441 50.1185085888209 108.589036223189 39.9519547348106  
46.0633179231318 52.6922486991742 61.776442749921 67.9141812398066  
80.4404044229341  
ARRDC5 46.0023068797812 50.2696827764943 39.1799070031819  
38.5252456306656 38.745552403895 35.8227939208521 40.4359177791566  
38.8495095797881 38.7298222155532 43.401782064778 44.7926323492519  
39.8497227447888  
ARS2 375.095491465679 571.992675891226 498.958550919515 299.052630634189  
666.816487335088 341.666968456707 423.608694638779 491.468862309918  
440.728435508514 427.199940706169 410.623529765253 355.7118155732  
ARSA 88.9589979655541 76.3228890963999 73.2144205844199 111.522812019895  
91.8935361535002 64.1777305915695 75.9236575152151 94.6432868887401  
47.5057905459278 65.4784797364469 62.5528124447176 76.3334723210842  
ARSB 53.593974682612 46.7353388797135 46.4150464549477 60.620259884953  
45.6348103033479 46.0001907122425 42.4386427013314 46.9354126752815  
43.3322911155321 41.3782540398445 45.3597029614942 44.9734311311394  
ARSD 146.066596263955 188.734299563005 194.079940066252 73.5025309968566  
74.4379676234684 94.3953345963359 231.685652845234 417.4609354305  
204.862161704394 292.47671022688 240.139560726101 144.609635554528  
ARSE 40.8681871019812 40.0527893189096 38.3166554965434 41.7614975630362  
39.859345745831 37.1317006162938 36.4098694708483 41.5464765641928  
38.2215591930186 48.1392888470269 36.2435874904689 40.1700117452801  
ARSF 36.9060997041453 38.6414316877471 42.640829914102 38.5252456306656  
39.3667161654772 38.6414316877471 40.0052661202207 44.5029690493211  
40.3316153483289 35.4990901121893 40.2649309204478 40.6614700944853  
ARSG 43.6706764143908 53.565717255469 49.1067959632109 68.0471049167726  
62.5106969730855 42.357910063876 43.6753843488695 64.8336014343435  
56.8622704143595 46.6598879466655 50.6473771879221 49.904979214379  
ARSH 43.4626049853157 41.4508241771315 40.931294690669 38.5252456306656  
39.5595233162192 36.8059561571675 42.629412460409 37.2237132058632  
47.3791873993182 41.5435611403119 40.9157352260901 41.6550823405646  
ARSI 43.4626049853157 39.8695929627783 43.8495248991589 38.3166554965434  
43.9450023643394 47.8636003588181 33.7574445386307 37.33030683349  
45.1899271235974 37.1275334308172 35.4386677371439 40.8681871019812  
ARSJ 48.6621527194963 46.5650556481721 39.9101908547397 43.8002456102021  
51.0107745412152 43.5752393599169 48.1747307200218 41.9315419791594  
44.8003345643334 50.8826620053386 48.8744644207821 58.8188963227059  
ARSK 48.7646976789783 47.3536182445315 52.7005092555102 53.9517841438975  
61.8471691369569 61.3620062177524 53.7423898357583 45.642304356051  
51.2066664465185 49.9493230064613 51.1483696410762 58.8188963227059  
ART1 38.2083710281545 37.10170285405 38.9790184198145 37.29566077996  
45.5809132232681 32.771863438151 44.4639405506967 38.745552403895  
38.9006788676407 39.1621898366355 43.0971787292711 47.3172462673426



|          |                  |                  |                  |                  |
|----------|------------------|------------------|------------------|------------------|
| ART3     | 38.5648843914189 | 41.554942319225  | 41.0356368374708 | 43.1847628331565 |
|          | 38.3561682218911 | 48.5835484742456 | 38.4005795891396 | 39.5466975353131 |
|          | 42.7150227340364 | 47.4767851750188 | 41.2598458726002 | 40.3691324547049 |
| ART4     | 50.379587451669  | 42.5269793679335 | 49.7350276169552 | 39.5050383901884 |
|          | 41.0885562160946 | 52.6226745117396 | 46.3057385979341 | 45.4757965005055 |
|          | 48.8842909466002 | 57.4665857273093 | 50.7903824729818 | 47.3172462673426 |
| ART5     | 39.9697332660833 | 43.4396866157171 | 39.7411455670172 | 37.8129870676592 |
|          | 47.5647821785529 | 40.650742261428  | 38.8417151851134 | 40.1474543172332 |
|          | 37.7805366040928 | 41.7932258301997 | 49.0361180089431 | 42.6758568421347 |
| ARTN     | 47.9796120205361 | 47.5203201376024 | 39.5450079747895 | 40.5829008199411 |
|          | 43.0723817756832 | 39.6789412274485 | 50.1185085888209 | 39.9576138799997 |
|          | 59.010844825874  | 47.1001757441025 | 44.1148826235374 | 45.0693869004277 |
| ARV1     | 120.837993273922 | 187.439021508049 | 264.718875269207 | 155.018308238778 |
|          | 231.417150220669 | 154.891160328731 | 141.261334415286 | 175.099998331811 |
|          | 188.750770811584 | 176.07173250529  | 174.584330660466 | 196.034087004464 |
| ARVCF    | 57.2960245538881 | 44.5152708955623 | 37.4642807402741 | 35.7674462337723 |
|          | 45.5809132232681 | 43.0860383229288 | 41.9393838138203 | 37.2237132058632 |
|          | 38.1169703906207 | 33.2987269789328 | 41.8168470823451 | 46.8129509799753 |
| ARVP6125 | 42.1537476443423 | 40.6380495994768 | 38.4043916290561 |                  |
|          | 45.5869891570251 | 41.1868052124344 | 40.1428591998404 | 41.5817737564592 |
|          | 45.4757965005055 | 42.0621425894624 | 42.5664883002833 | 43.844855336215  |
|          | 39.7411455670172 |                  |                  |                  |
| ARX      | 48.9906383294199 | 38.9338521051669 | 39.6451483836089 | 47.6687908290818 |
|          | 41.5668884168669 | 43.8582747295766 | 37.2892641289258 | 50.1833483241864 |
|          | 36.2733735494625 | 43.6033221838149 | 37.5583886316038 | 41.4508241771315 |
| AS3MT    | 40.3478825593224 | 40.7952353240579 | 36.5474283500601 | 49.1786207920603 |
|          | 40.2449343247539 | 53.8461734834857 | 48.3411413510851 | 51.8347877274018 |
|          | 41.7627910693483 | 45.9004543328976 | 43.3085358214154 | 48.0350549043063 |
| ASAH1    | 55.7246872330059 | 69.0663624160288 | 78.7103847663605 | 80.8728961146267 |
|          | 55.0031529299037 | 73.2144205844199 | 54.4313108506244 | 48.1591264215184 |
|          | 62.5542376788358 | 49.015238049903  | 51.3560869192313 | 64.2164483533411 |
| ASAH2    | 45.2372944462326 | 42.9358255168086 | 44.696023817801  | 41.8778873678551 |
|          | 42.7475279082279 | 43.9421822132391 | 44.0687697278114 | 42.4580504587581 |
|          | 42.5750559787101 | 43.5599890586394 | 43.917817324545  | 42.4607795638552 |
| ASAH2B   | 45.5758521267508 | 44.1533327883807 | 40.931294690669  |                  |
|          | 44.1483976313959 | 42.9655396732962 | 43.8582747295766 | 43.0930293831497 |
|          | 41.7877325563821 | 46.6944238390932 | 52.7972156492746 | 43.0016969050339 |
|          | 44.4067063477243 |                  |                  |                  |
| ASAH3    | 44.9896851005259 | 41.8848959280916 | 39.6451483836089 | 44.550322123994  |
|          | 38.745552403895  | 35.5158505219112 | 38.4005795891396 | 36.9355798143571 |
|          | 42.4540072551568 | 42.6793753550854 | 43.0971787292711 | 40.5703581862752 |
| ASAH3L   | 45.2875173643252 | 202.872083191114 | 95.7820879892969 |                  |
|          | 43.074472921841  | 189.678033532012 | 57.4777075615651 | 69.9214859673839 |
|          | 227.642500471069 | 111.397578350396 | 79.4158467034017 | 83.3729277601518 |
|          | 66.6118713143653 |                  |                  |                  |
| ASAM     | 159.797219482154 | 56.3560498705517 | 46.8267540220952 | 169.144145421022 |
|          | 60.1730663840476 | 211.227389226633 | 53.4921736109774 | 108.463445585898 |
|          | 45.4799270968969 | 82.966263655525  | 138.859992681388 | 117.052403700291 |
| ASAP3    | 132.985150338484 | 53.565717255469  | 83.0959169307948 | 68.6379135603075 |
|          | 83.3905516293346 | 136.875335055866 | 78.080034922779  | 186.570670850819 |
|          | 113.218291314173 | 132.107655569343 | 202.795613942391 | 103.376225272425 |
| ASB1     | 83.7215159198897 | 59.5534127075228 | 77.0301627655229 | 63.3006977162657 |
|          | 53.1884505015411 | 112.551747307723 | 69.9214859673839 | 62.4219686957673 |
|          | 50.9010149857308 | 92.9894133685392 | 89.0684909049451 | 93.2319962015465 |

|       |                  |                  |                  |                  |
|-------|------------------|------------------|------------------|------------------|
| ASB10 | 38.8561375693335 | 46.8236022402545 | 44.5134109184888 | 42.5664883002833 |
|       | 40.3452320167286 | 41.0582900711341 | 44.2166118829877 | 45.7476095696859 |
|       | 55.3122077514658 | 46.0119912782855 | 43.0016969050339 | 42.357910063876  |
| ASB11 | 39.8662795144616 | 44.0409178714232 | 39.4987030972173 | 44.7210190486327 |
|       | 39.9697332660833 | 39.673290670647  | 43.0177448037924 | 39.0102066700839 |
|       | 41.0522938990031 | 41.9666541498638 | 40.547835538778  | 44.7857390222342 |
| ASB12 | 41.9407041937973 | 39.2907645923217 | 51.6159542017038 | 43.5627649099623 |
|       | 36.8059561571675 | 45.1873487463472 | 42.629412460409  | 41.3506832276112 |
|       | 42.4540072551568 | 56.057906531592  | 53.8260140375214 | 50.0571060701893 |
| ASB13 | 101.448989278761 | 224.509915754308 | 168.522052983892 | 97.0813208326187 |
|       | 277.284338888467 | 149.076166432567 | 141.572530741416 | 126.10194284238  |
|       | 206.190699642477 | 241.792833275833 | 194.046072415847 | 165.311139930529 |
| ASB14 | 44.9896851005259 | 40.716553247236  | 39.6451483836089 | 39.7411455670172 |
|       | 41.7929491793697 | 36.1190722948669 | 36.634024014558  | 42.357910063876  |
|       | 40.7847110517594 | 48.3693338695392 | 30.802355637173  | 40.3691324547049 |
| ASB15 | 41.4508241771315 | 43.9421822132391 | 40.4882741869718 | 38.3166554965434 |
|       | 39.5595233162192 | 43.9724628401189 | 40.5585676679482 | 45.1714698794331 |
|       | 39.6609238036815 | 39.9948390976317 | 40.8225507267584 | 41.4508241771315 |
| ASB16 | 37.0320432433314 | 46.0713306971594 | 39.0775870687758 | 85.7983996395757 |
|       | 41.3755760434934 | 42.5660695551615 | 36.7356360093603 | 39.6474008369935 |
|       | 43.0930293831497 | 46.325232414659  | 39.7342718293432 | 39.9519547348106 |
| ASB17 | 40.6062943725118 | 39.0894172982439 | 40.0557788909923 | 39.4569929845912 |
|       | 42.4864576619427 | 40.1428591998404 | 38.2280071951674 | 39.6474008369935 |
|       | 36.5393857306744 | 41.5804111566887 | 38.956280281655  | 38.3834435509221 |
| ASB2  | 43.844855336215  | 43.8495248991589 | 43.0016969050339 | 53.9517841438975 |
|       | 40.9950639693255 | 58.8605811695948 | 44.6032218589199 | 45.2806199505029 |
|       | 44.4395580493118 | 50.6486940895674 | 47.8988096575648 | 42.8864415494484 |
| ASB3  | 127.437627356956 | 91.0327980861321 | 120.825113658705 | 123.444247442399 |
|       | 93.6591201235745 | 101.577767481269 | 96.1181720777683 | 119.157952832454 |
|       | 100.591821617326 | 130.230482445573 | 104.773064067069 | 108.855682928578 |
| ASB4  | 41.3848620620968 | 35.7725167297364 | 36.0306975524309 | 36.7128997214853 |
|       | 35.5833299694641 | 43.2219358930127 | 39.9620349773712 | 38.9229928131225 |
|       | 39.3435164409386 | 45.4953384153622 | 41.4918397757335 | 40.8254641406268 |
| ASB5  | 42.9641759692926 | 34.9262464079777 | 32.9756367838345 | 37.1894304543751 |
|       | 36.3853022034874 | 160.080366694799 | 37.8877750141557 | 41.4508241771315 |
|       | 37.1820543575123 | 107.987729161223 | 75.6883778954949 | 183.77850568836  |
| ASB6  | 65.8959431201418 | 67.0402749076279 | 51.3268475761593 | 59.5177293266879 |
|       | 53.207589413582  | 60.8357760968871 | 84.1327646296491 | 64.0752803796842 |
|       | 64.0096843640535 | 79.3775933954493 | 69.1605201046373 | 58.7625374942126 |
| ASB7  | 46.2190348814788 | 46.9670128044811 | 42.9734677356549 | 41.5464765641928 |
|       | 47.965492554043  | 41.0582900711341 | 42.7982502551634 | 41.5817737564592 |
|       | 41.863927676552  | 41.5435611403119 | 44.8278961893983 | 41.1914475733743 |
| ASB8  | 89.9580440276828 | 80.0502531022254 | 79.7733480606334 | 73.7986685173579 |
|       | 64.428683021978  | 102.471939526704 | 67.3359520423391 | 67.3976855661302 |
|       | 95.0604882262201 | 78.3509756704423 | 93.5982028088194 | 79.2525964926483 |
| ASB9  | 56.8534370691413 | 41.6466169548846 | 48.4890615340603 | 46.9919960628953 |
|       | 55.3718910891548 | 52.9482338979681 | 68.0157730844432 | 54.9071823326024 |
|       | 80.1505160355175 | 44.3303034026662 | 45.4799270968969 | 42.2577689927563 |
| ASCC1 | 279.901217752341 | 232.879882989322 | 394.437597863822 | 354.086949676663 |
|       | 363.527881831453 | 334.438091900861 | 293.258858033133 | 298.420882349382 |
|       | 720.552354470517 | 328.788681417522 | 275.928723831899 | 313.528012643479 |
| ASCC2 | 585.237875919074 | 963.224016480187 | 1712.55038816005 | 423.43141595962  |
|       | 634.226367147025 | 507.239294307089 | 1296.28036613191 | 2903.00880209344 |
|       | 792.880882528835 | 1226.43929953115 | 1343.66876893729 | 1026.51177853708 |

|         |                  |                  |                  |                  |
|---------|------------------|------------------|------------------|------------------|
| ASCC3   | 67.1108025189303 | 102.605473054584 | 102.77259665192  | 75.6883778954949 |
|         | 63.7417623042104 | 66.5774376622485 | 82.5506190124216 | 70.18107651423   |
|         | 85.9596109950132 | 71.2963721541702 | 79.4832790698673 | 86.8596934326046 |
| ASCC3L1 | 62.7669079605627 | 53.565717255469  | 57.9279989359711 |                  |
|         | 54.2886483704949 | 49.32293280121   | 106.067766766889 | 58.0139597055449 |
|         | 59.1107691694766 | 67.235655687817  | 131.645714321903 | 134.504159974855 |
|         | 96.1710806345503 |                  |                  |                  |
| ASCL1   | 50.0466349801009 | 39.0894172982439 | 45.063792968927  | 45.1944222548351 |
|         | 42.7107928951766 | 42.9695585740813 | 43.3262148375525 | 41.4508241771315 |
|         | 43.8482802038826 | 39.6719190054379 | 45.310660704531  | 46.7182294568603 |
| ASCL2   | 382.251727747377 | 118.010166045155 | 120.881290860109 | 154.019005732316 |
|         | 106.951862149262 | 61.1022920882065 | 161.929470244265 | 204.68542226859  |
|         | 561.509463439533 | 486.487366153374 | 327.283431584541 | 263.096895937991 |
| ASCL3   | 36.0144420013819 | 39.0102066700839 | 40.8420925848403 | 37.1894304543751 |
|         | 39.4693871570028 | 40.040778349137  | 40.6750540874299 | 47.4740726032707 |
|         | 34.8552366193358 | 39.5637454855233 | 44.2142581488029 | 35.8429598823818 |
| ASCL4   | 39.1590964332473 | 38.2263227947189 | 39.991353369336  | 47.8164193292842 |
|         | 37.8679241954337 | 41.2567470068038 | 36.3194282084339 | 36.1375121409002 |
|         | 43.1805016690297 | 39.4710743516517 | 40.1742127891824 | 36.1647506311964 |
| ASF1A   | 116.042856605255 | 149.933827818309 | 121.86893260878  | 97.8309399470621 |
|         | 85.7842344710572 | 155.795095438102 | 102.380096190518 | 163.476051754305 |
|         | 113.477848709768 | 127.937436596431 | 125.661351053514 | 114.809299879058 |
| ASF1B   | 91.3967044940546 | 94.3229189690855 | 79.8773095098789 | 55.6481366056639 |
|         | 152.792457231813 | 52.9482338979681 | 150.985239447761 | 131.258204302177 |
|         | 204.009492151839 | 40.3235655331796 | 44.553780984244  | 53.0446815750355 |
| ASGR1   | 53.8856501960117 | 45.8669209716694 | 46.2625470410195 | 74.6159297822533 |
|         | 56.9360840563854 | 53.8461734834857 | 57.6643188499117 | 57.8765910878975 |
|         | 49.4786466722535 | 48.3693338695392 | 46.8954576545929 | 48.1627097465883 |
| ASGR2   | 38.9152309941518 | 44.4031868028216 | 41.437237454134  | 77.7973642829228 |
|         | 38.1096479110295 | 42.4058515827212 | 41.3594868055879 | 40.6171774724171 |
|         | 38.6322728994674 | 41.9666541498638 | 39.5847121472157 | 42.6208563330129 |
| ASH1L   | 44.1294459089314 | 41.159706131351  | 43.5710871617107 | 43.9282059368202 |
|         | 40.148780650831  | 40.5281496800812 | 41.4742337714895 | 41.6466169548846 |
|         | 47.7086093893038 | 40.8970401536578 | 43.0971787292711 | 47.3172462673426 |
| ASH2L   | 254.519518210024 | 408.216955625565 | 456.612479133179 | 298.367217540986 |
|         | 342.387761195952 | 462.562743021008 | 467.351570171652 | 321.359569119182 |
|         | 214.873872837015 | 272.315378390681 | 362.123479430887 | 279.448591201269 |
| ASIP    | 47.7267190613906 | 38.2263227947189 | 40.6737160001291 | 65.524821699432  |
|         | 38.2496050953547 | 59.1570467228834 | 46.4388841354122 | 43.1567024035183 |
|         | 46.2027193115397 | 42.1622837416589 | 46.0095710163378 | 40.3691324547049 |
| ASL     | 51.5888395924843 | 55.5712957590038 | 64.4512696384839 | 49.4786466722535 |
|         | 58.4383854340181 | 47.2009420656854 | 61.746195120737  | 49.6733735285073 |
|         | 75.7257660897685 | 48.1392888470269 | 50.3221380889396 | 46.1980780531506 |
| ASMT    | 45.6517320730042 | 38.3322849790657 | 41.437237454134  | 44.550322123994  |
|         | 38.8456942580061 | 39.0266821712099 | 38.941855825269  | 39.9576138799997 |
|         | 40.7847110517594 | 41.0057887014368 | 40.8225507267584 | 36.8690774823319 |
| ASMTL   | 135.567012693522 | 85.0653700751969 | 95.6731932757489 | 132.973097496421 |
|         | 76.2591822114739 | 166.821616593685 | 72.2873593966596 | 116.490154128114 |
|         | 58.1180488026629 | 119.157952832454 | 130.35828139117  | 93.8630393470857 |
| ASNA1   | 36.9060997041453 | 45.0115870036541 | 37.6557714476853 | 41.3027031037343 |
|         | 41.9842695818285 | 36.3845892764084 | 37.830876898596  | 39.0620487644635 |
|         | 40.7847110517594 | 35.93950183586   | 43.5710871617107 | 37.0953622406687 |

ASNS 205.187554095744 165.905008152959 158.321459945365 186.477689350702  
195.740109330843 195.512986297442 260.766438659762 300.412043023998  
339.313853828248 168.67163443217 160.152738034528 162.02498480452  
ASNSD1 367.808375988242 308.64836180781 295.5163490537  
334.093449847539 386.271174243357 576.830397705584 217.39432336811  
280.034472186873 280.446302631438 186.229678647062 237.532800487032  
353.076989769287  
ASPA 35.0202257459026 38.0226905622357 48.4890615340603 41.6564075217517  
43.4544762830742 76.7791768896805 39.2533668167483 38.5457716679071  
37.4540772310118 57.165971310746 62.2965257278236 64.863894209343  
ASPH 66.4079972657486 87.1109435144663 75.8779316255794 63.0153175111747  
63.4249771379563 69.3368205576982 62.2982003555312 60.1156117108741  
73.5025309968566 48.1907683998167 49.4157684139858 57.4054069675016  
ASPHD1 57.7877627794725 40.2973086894872 42.0960619209699  
44.9370339275041 68.1674425673171 42.2577689927563 45.8204185866107  
43.0390857698452 40.8503192605024 38.1472552468971 41.5638908543693  
41.5083179498332  
ASPHD2 56.121460370892 75.5775406974686 56.607199625498  
71.7167037224069 50.5110359971301 44.9896851005259 68.0157730844432  
58.2043532960091 68.3157692917711 45.4614234442527 58.3586374083245  
62.5447504571181  
ASPM 140.063595285844 113.26670675749 125.137803364368 68.6379135603075  
205.672652429972 53.8461734834857 226.553946570328 242.450054864856  
184.123415143164 49.0841460667818 38.956280281655 49.3984571719129  
ASPN 42.9104454767916 44.3529919625344 46.8267540220952 55.4180794172794  
43.844855336215 43.5752393599169 41.4742337714895 37.9837233601316  
45.8325181856483 41.2276963324981 44.7114813656401 47.3172462673426  
ASPRV1 41.4508241771315 47.6914221838216 46.2625470410195  
83.1614238528477 55.1563703466328 48.3686935595826 50.0088611244948  
45.5581356216957 41.863927676552 55.4037482627222 47.9942520395434  
46.917149434588  
ASPSCR1 169.251790128723 235.888544042065 197.011675186182  
160.283895105835 298.313562383092 129.143252341926 227.94699237549  
175.529493306927 350.917244438732 166.304210248623 183.526640731647  
142.012216533823  
ASRGL1 43.2724556187214 46.5650556481721 37.6557714476853  
45.334106390212 38.1644569189523 42.5660695551615 54.8074655158941  
62.4219686957673 35.6970528713709 38.1042454705119 36.7283081422707  
42.0424641526302  
ASS1 307.445116836976 119.747995520476 107.741669334989 98.4763347474813  
186.64040927334 153.797431763616 704.601607617837 331.239629083778  
798.033975337132 306.578554914328 408.216955625565 266.865951970965  
ASTE1 56.4553747079294 74.6847594297153 74.0913177754682 63.3006977162657  
87.8170592981737 65.6914955077809 73.3042538589134 54.720204938924  
82.0993943936197 82.2431666775699 73.7060605978536 68.9885481504003  
ASTL 39.5676051939342 44.2105195734073 43.0016969050339 39.5050383901884  
46.5557478175976 46.3715909653832 56.7780520416533 45.642304356051  
43.7630587657205 47.9056710878325 41.9083581529276 39.9519547348106  
ASTN1 39.6609238036815 38.5921548841176 39.5450079747895 47.3574589211166  
35.9894133432376 43.8308097066396 41.4186558780356 41.6916508480321  
38.7298222155532 42.9866214102525 41.0050831223107 39.1553169409075  
ASTN2 46.1673159982664 56.1838945110653 41.6564075217517 41.5464765641928  
46.5557478175976 49.2731519807085 41.4742337714895 51.3240729268978  
42.6861857638473 67.2047715601721 57.115361349315 58.8856060454401

|        |                  |                  |                  |                  |
|--------|------------------|------------------|------------------|------------------|
| ASXL1  | 129.336439341458 | 105.204861495017 | 76.1493261430901 | 110.112236384679 |
|        | 141.960773054307 | 113.377818029985 | 149.156754860718 | 76.4637616585578 |
|        | 105.914573205761 | 108.788705797019 | 102.87193290903  | 85.8154958329408 |
| ASXL2  | 139.712472369259 | 201.764909400617 | 253.072560237983 | 290.316757790733 |
|        | 247.356027979377 | 204.477547372897 | 190.465025329717 | 299.890705180422 |
|        | 103.720371491639 | 148.925503526873 | 193.897678586782 | 221.65810716537  |
| ASXL3  | 39.0620487644635 | 38.3322849790657 | 41.8751578329365 | 39.3750969348308 |
|        | 39.7568367479301 | 40.1428591998404 | 42.629412460409  | 39.853866204927  |
|        | 39.853866204927  | 38.1042454705119 | 38.8507804383261 | 40.0557788909923 |
| ASZ1   | 39.6609238036815 | 38.861780967827  | 35.6765064335425 | 42.5193208629123 |
|        | 35.7098133359722 | 34.3473914754963 | 38.8775560911841 | 38.1835938174625 |
|        | 38.7578265341627 | 35.8914040545805 | 37.9553529562144 | 40.7704587752083 |
| ATAD1  | 100.663054866186 | 129.984065394671 | 111.077646506425 | 105.422823184744 |
|        | 124.295423292168 | 176.991120397205 | 115.496195377983 | 81.2228688683149 |
|        | 134.581057139589 | 105.046407769128 | 136.081259669601 | 173.328468320432 |
| ATAD2  | 137.360931076154 | 197.617554897454 | 115.840734064724 | 75.9099205260748 |
|        | 175.60601369033  | 70.7238101239421 | 161.439879456216 | 90.9010016862442 |
|        | 221.049503614433 | 56.3441077510744 | 54.4140381300469 | 76.5411379733694 |
| ATAD3A | 105.739423435604 | 97.4709987978999 | 94.5055588176321 |                  |
|        | 86.7823828209946 | 189.137593177772 | 103.569150754726 | 170.87055409699  |
|        | 148.514056973195 | 177.379924616924 | 88.4385631861141 | 94.5111909776371 |
|        | 85.9286114777649 |                  |                  |                  |
| ATAD3B | 48.5835484742456 | 53.3683962805281 | 57.0427273538849 |                  |
|        | 43.1847628331565 | 75.4652763126449 | 50.6360662655392 | 56.4809146784765 |
|        | 45.7476095696859 | 62.0272989884264 | 38.745552403895  | 52.1788489555942 |
|        | 46.2625470410195 |                  |                  |                  |
| ATAD3C | 45.6517320730042 | 39.8695929627783 | 40.931294690669  |                  |
|        | 46.0228732507872 | 47.4548471240051 | 51.702461863489  | 46.9929836306816 |
|        | 45.5581356216957 | 41.9635525160083 | 43.401782064778  | 43.0971787292711 |
|        | 48.0350549043063 |                  |                  |                  |
| ATAD4  | 284.013140015092 | 128.70380102034  | 137.424708183613 | 73.7124988616836 |
|        | 110.869341159607 | 80.3805507705979 | 234.172977976583 | 139.645717741863 |
|        | 221.71759246183  | 112.760972238512 | 123.032006903803 | 83.9236799134394 |
| ATAD5  | 41.1523487516364 | 39.6123051184545 | 40.301483914446  | 42.1273928203021 |
|        | 43.844855336215  | 43.7630587657205 | 43.3262148375525 | 37.0390589468421 |
|        | 37.7384958256497 | 40.5090849993014 | 41.2598458726002 | 38.6454098044474 |
| ATCAY  | 41.7397731376692 | 44.8529259387308 | 38.6005272730664 | 43.9282059368202 |
|        | 44.2607789091176 | 42.750861693377  | 36.7356360093603 | 42.4580504587581 |
|        | 45.4799270968969 | 40.8970401536578 | 41.0808257270221 | 40.3691324547049 |
| ATE1   | 40.1909200785004 | 58.2924877745079 | 49.5424425850549 | 48.0673507506626 |
|        | 46.9058511192313 | 50.1663232705412 | 43.1931731665131 | 44.293922970134  |
|        | 44.2237010679985 | 49.7259371799014 | 46.8954576545929 | 49.2064066614865 |
| ATF1   | 47.4678477186801 | 44.7829632472754 | 57.1226931773006 | 49.3654837541353 |
|        | 38.3561682218911 | 44.9896851005259 | 48.8319884367456 | 48.7814131120945 |
|        | 57.4777075615651 | 49.4006068471301 | 46.0095710163378 | 53.3904307221902 |
| ATF2   | 64.1882546112044 | 58.2571968311834 | 81.1249338842464 | 74.8706881113318 |
|        | 79.0039595317374 | 79.6895408438974 | 65.7873990226533 | 57.5640428227111 |
|        | 72.5993974280876 | 53.5498255316009 | 60.3431719501866 | 84.5354986509039 |
| ATF3   | 164.941191767024 | 728.257836227637 | 98.9988668602468 | 192.112101000423 |
|        | 77.7852875052734 | 584.724083441601 | 303.139550962377 | 551.490493022416 |
|        | 120.679433440203 | 152.679927202674 | 360.900649927623 | 164.96500173066  |
| ATF4   | 626.390544175817 | 513.891389190131 | 548.047774435177 | 693.056793637199 |
|        | 400.506633704584 | 834.14766574977  | 713.685405035516 | 751.953794043451 |
|        | 636.137048640939 | 1377.24483375075 | 990.431472174705 | 1068.10627239579 |

|         |                  |                  |                  |                  |
|---------|------------------|------------------|------------------|------------------|
| ATF5    | 164.146682514925 | 236.910422092851 | 172.574996256912 | 354.634819362978 |
|         | 249.308868215205 | 218.958199087236 | 155.855834721836 | 185.395460281034 |
|         | 232.147792636393 | 135.973016473297 | 158.901175732866 | 125.383837024985 |
| ATF6    | 188.042978085327 | 290.761706869722 | 386.787221140343 | 361.091144969609 |
|         | 311.901423694475 | 232.740032714891 | 214.245832611737 | 177.379924616924 |
|         | 254.239142284878 | 186.372887375058 | 211.654245727798 | 253.267901237295 |
| ATF7    | 45.3872406432794 | 47.4076235350059 | 44.696023817801  | 42.2496337895968 |
|         | 45.4751076037511 | 37.0180934800573 | 51.0013344286851 | 45.0972184964705 |
|         | 43.4656637536244 | 38.745552403895  | 45.310660704531  | 40.3691324547049 |
| ATF7IP  | 50.2203578628217 | 48.3699741879723 | 48.1997158668729 |                  |
|         | 51.0175677516029 | 42.1650127805175 | 44.5544727111028 | 44.7255207589606 |
|         | 42.0494116081998 | 46.4164127487052 | 38.528621456378  | 40.6373400186325 |
|         | 46.4499258373233 |                  |                  |                  |
| ATF7IP2 | 82.9467575626263 | 256.026804821501 | 338.475097952023 |                  |
|         | 100.344513700137 | 177.82359682336  | 70.2553917409773 | 86.7968607218397 |
|         | 153.901083585889 | 216.063990451376 | 403.243939813779 | 434.523449093691 |
|         | 371.167168940365 |                  |                  |                  |
| ATG10   | 100.057155418659 | 79.1432909353319 | 106.443777149496 | 124.490684428024 |
|         | 66.5694839794116 | 111.691813916343 | 100.597578643877 | 128.70380102034  |
|         | 81.3858672064773 | 128.291287011686 | 141.370796803908 | 104.860298453006 |
| ATG12   | 238.647490689325 | 186.450759425396 | 206.481424743576 | 349.096725048776 |
|         | 164.709142211696 | 217.189489936251 | 171.722423740869 | 429.725397949276 |
|         | 135.043488274939 | 248.797398220982 | 273.645674189546 | 264.600870859012 |
| ATG16L1 | 277.069127740648 | 161.65846687852  | 186.54041506387  |                  |
|         | 176.492987902471 | 209.705575423447 | 221.972553229362 | 136.883475451494 |
|         | 184.519582091623 | 191.59357986481  | 200.958421322871 | 225.760096749053 |
|         | 201.208357379329 |                  |                  |                  |
| ATG16L2 | 70.6065558064758 | 69.734208465775  | 133.893108529325 |                  |
|         | 145.526972410673 | 96.0418367475772 | 85.5027511448958 | 109.901105821696 |
|         | 68.3372228877569 | 67.6983931011126 | 157.312247745825 | 116.080897948094 |
|         | 111.227016020927 |                  |                  |                  |
| ATG2A   | 97.8141040140486 | 159.835690229505 | 180.844663304872 | 267.024267633341 |
|         | 229.792906003602 | 129.675613712326 | 164.580141651883 | 134.185571685143 |
|         | 127.863441809606 | 139.45393201022  | 129.236597599908 | 83.3729277601518 |
| ATG2B   | 57.934905173625  | 55.5294887653184 | 62.9313387640547 | 82.2766822827861 |
|         | 58.6481644777552 | 56.4819802857598 | 61.5000955267432 | 63.0748373122119 |
|         | 71.9062462001972 | 55.6865353018811 | 68.3157692917711 | 66.2305843819029 |
| ATG3    | 142.309369995384 | 204.68542226859  | 233.692490031492 | 535.585999498708 |
|         | 241.455752070163 | 244.089971761037 | 221.598637828404 | 165.905008152959 |
|         | 223.040734249612 | 122.099297248392 | 112.721024337362 | 157.639656300073 |
| ATG4A   | 61.4416707689893 | 59.2643906275025 | 76.474194677956  | 83.877343750194  |
|         | 68.8362790228976 | 66.7278011183421 | 56.9320717885002 | 69.845169494661  |
|         | 86.9274372004388 | 59.0630473216622 | 63.4610447573417 | 53.7820518773759 |
| ATG4B   | 90.1056480599534 | 103.289476128549 | 118.251739134889 | 62.6048727240291 |
|         | 94.7604013126314 | 82.1974756449763 | 90.2915974511786 | 65.6914955077809 |
|         | 104.17651993553  | 43.4885245598939 | 52.022479439889  | 64.4156641487994 |
| ATG4C   | 72.0334593545916 | 63.4570909617664 | 61.8701572127817 | 92.084526929319  |
|         | 72.0482026084702 | 77.6574950328663 | 66.1940959364976 | 57.037639245179  |
|         | 84.4111182389028 | 56.284748518655  | 60.7516146716018 | 68.3234331335073 |
| ATG4D   | 49.7827734675743 | 70.9970523709176 | 57.6371756925687 | 42.2496337895968 |
|         | 62.7488501311848 | 51.3886035574416 | 48.9088046212958 | 50.0802438185974 |
|         | 66.7357366223349 | 53.2340637435567 | 61.7572675712557 | 54.7953298048942 |

|        |                  |                  |                  |                  |
|--------|------------------|------------------|------------------|------------------|
| ATG5   | 164.262531918679 | 72.1401612718245 | 85.8945498067934 | 81.6780581904253 |
|        | 63.955655956484  | 107.440379066528 | 76.0041771381018 | 159.99819920335  |
|        | 67.591570323687  | 138.637058021129 | 127.051878502711 | 128.098188757701 |
| ATG7   | 356.826869112433 | 212.353676518748 | 225.960701908311 | 361.945511835039 |
|        | 156.433762355183 | 175.876518898179 | 196.034087004464 | 345.084002073846 |
|        | 128.923092916744 | 181.873969432903 | 186.301404367238 | 134.869029698594 |
| ATG9A  | 136.613915120582 | 86.7823828209946 | 117.149897485203 | 99.126949393699  |
|        | 127.908440924429 | 97.5962784863854 | 101.634888749356 | 97.3870880869036 |
|        | 132.098298410135 | 135.169625016001 | 115.052948380817 | 95.6511488323697 |
| ATG9B  | 47.0940613507321 | 42.0709558258414 | 44.0451487108213 | 46.0228732507872 |
|        | 38.4540849632254 | 42.8598805316863 | 43.8206425661746 | 46.2779564481158 |
|        | 59.7483827511172 | 40.1179210534118 | 41.9083581529276 | 47.0130468198828 |
| ATHL1  | 143.084029849218 | 377.847116683974 | 294.849830545881 | 264.263104842911 |
|        | 100.386011517899 | 85.0275638433103 | 87.0685571351947 | 91.3607028449916 |
|        | 62.6386437936516 | 70.7003843117511 | 85.8277891453447 | 84.4349803529132 |
| ATIC   | 929.862002014478 | 706.087945508248 | 710.579735673002 | 419.993482471924 |
|        | 807.620534408416 | 479.079946537291 | 567.978225839768 | 879.708199333257 |
|        | 659.126408705362 | 808.857027942253 | 801.351998609551 | 625.435083064752 |
| ATL2   | 244.343381048643 | 107.176733647834 | 134.725028732282 | 111.522812019895 |
|        | 163.028918580618 | 179.522572239758 | 245.960009147234 | 207.928770428477 |
|        | 131.451150955309 | 86.9626166234066 | 98.9560329133205 | 122.368552598681 |
| ATL3   | 245.691073028699 | 93.3718038663074 | 181.966839676473 | 267.70610731202  |
|        | 180.255771684507 | 113.979504140326 | 184.269633116351 | 394.877241043728 |
|        | 116.388069891158 | 142.846665249354 | 104.873452487222 | 170.184914156265 |
| ATM    | 72.5559426064896 | 64.7318794662958 | 71.2867274976738 | 128.542999559673 |
|        | 91.4786089554886 | 109.659686701319 | 60.4492532011622 | 59.9770720847728 |
|        | 70.4933405598359 | 74.9236800269025 | 78.8741966117641 | 83.2240772671045 |
| ATMIN  | 114.404099081799 | 72.5397346298724 | 79.8196996067124 | 57.9459232180399 |
|        | 77.2007992738116 | 71.7585486695516 | 69.6301237585571 | 66.8364940429355 |
|        | 95.5325488969517 | 59.8130420783374 | 91.6253858792439 | 66.9239565096247 |
| ATN1   | 75.7140064167134 | 72.1090339831747 | 62.4317959077388 | 54.1240583139871 |
|        | 68.6199296680241 | 88.5207664670319 | 91.4514026506253 | 89.3868257841517 |
|        | 74.0831311663524 | 110.909109947659 | 99.6288131333575 | 81.382229980722  |
| ATOH1  | 42.5193208629123 | 38.4330755397458 | 43.3085358214154 | 37.9875302985336 |
|        | 33.6330903323612 | 38.7340969861754 | 47.7390230243778 | 45.1714698794331 |
|        | 37.6383530120621 | 38.745552403895  | 33.9478220100351 | 38.8495095797881 |
| ATOH7  | 39.266565827316  | 38.2835812177457 | 44.0451487108213 | 47.420942961753  |
|        | 44.0451487108213 | 42.1046072075724 | 47.6810611485413 | 41.1575777497576 |
|        | 40.2739700860114 | 39.528971131769  | 41.5668884168669 | 39.4830039788612 |
| ATOH8  | 37.8386378737561 | 63.1780854659428 | 95.7820879892969 | 45.1944222548351 |
|        | 70.4607501403122 | 51.3886035574416 | 54.0170817319522 | 47.4740726032707 |
|        | 82.9256976863272 | 206.08791147394  | 222.8744321245   | 69.1099722732115 |
| ATOX1  | 590.709061039001 | 268.745928429069 | 500.241231327789 | 785.79878416775  |
|        | 391.397318564183 | 442.711822532078 | 404.356143472409 | 761.922486104216 |
|        | 351.290929267326 | 604.357590751951 | 532.35007819883  | 562.531738167208 |
| ATP10A | 45.4799270968969 | 39.7835513496873 | 37.5597671487621 |                  |
|        | 47.481302504066  | 37.1565984182084 | 39.8455060654531 | 48.9826868640753 |
|        | 42.8482181313226 | 43.2761454096265 | 41.0057887014368 | 35.1470994647364 |
|        | 37.7526485343328 |                  |                  |                  |
| ATP10B | 534.881442644054 | 137.696331574552 | 174.275409358652 |                  |
|        | 53.9517841438975 | 45.2556760873335 | 43.9724628401189 | 71.8466937395628 |
|        | 398.229956085523 | 53.7442594289333 | 49.8393069675192 | 51.524711857679  |
|        | 49.0655215909632 |                  |                  |                  |

ATP10D 32.406093465115 44.5884811528117 41.528370959196  
44.1483976313959 42.269054475455 40.7616966228404 38.5066108855005  
37.0390589468421 47.798305839406 44.2580151149956 47.1477056711335  
44.7401523707775

ATP11A 38.1169703906207 37.3179578037963 40.5734458834617  
40.3180310664156 37.8679241954337 40.8970401536578 38.7337086062875  
39.8016018354453 39.6413313949444 36.6893251782922 35.5179217192467  
40.8098117292322

ATP11B 68.6627996695828 66.6332042895961 91.7844162703214  
86.500678864429 58.7460488758053 81.2314452281031 94.6952414258466  
86.033725825968 75.9298650598599 81.7967230859562 86.3054012048636  
97.8764110456132

ATP11C 49.7827734675743 55.4848084120513 54.0536858212253  
57.7057442885013 70.2565873027242 55.4409373780772 63.5738862549306  
74.2517888452553 70.7760293129408 59.9792284253187 66.5285423077808  
94.1844708285913

ATP12A 38.2083710281545 44.1239711172417 40.1985790927248  
35.6928955245309 41.3755760434934 48.0350549043063 42.8684958525042  
66.6320017520888 43.5669306063196 40.8049408996274 41.5421429082231  
42.4607795638552

ATP13A1 101.688066199665 132.307107503819 122.988056802699  
271.070078611015 172.349874473605 75.1674447943072 127.232160404726  
323.957165066178 140.586248661832 105.212030988223 113.612874206329  
97.6552689677199

ATP13A2 111.760213205992 111.071209057746 107.637618676176  
77.3864518736634 111.033548392096 61.2387559102636 124.803597244786  
134.952392466784 96.9051967257119 73.0394191668858 75.8976034525022  
78.4023698691285

ATP13A3 46.263826584899 49.015238049903 45.3974838013476  
59.0965219753805 45.402658694824 44.6524308640784 43.6025443656008  
43.9604529016594 39.7537274655115 39.4710743516517 43.6919270353542  
48.6795178347248

ATP13A4 50.5670783769975 36.1232327599945 47.2962360458401  
35.3829784221072 39.0564222526273 34.3887641786747 38.4005795891396  
50.3972033014227 35.3227485563945 38.745552403895 39.3667161654772  
40.9683275553869

ATP13A5 40.7609952437622 36.0366673493555 39.0775870687758  
35.1451084093692 39.0564222526273 41.0582900711341 40.4359177791566  
42.6450179841129 40.5912213523345 41.1222709786153 40.0766543123257  
36.064718696392

ATP1A1 882.105892529265 454.02808608679 657.031980628955  
674.270050283701 570.085422388476 555.727708387209 698.595302020108  
745.219025960188 977.776395810338 603.737787922337 858.975085087497  
821.922096305069

ATP1A2 29.633229264005 40.2493681589104 39.3709357615493  
38.745552403895 27.4352294118391 90.2790229242453 42.0605906240248  
40.831207953647 41.9635525160083 77.0226403968683 65.7587943905649  
40.7704587752083

ATP1A3 37.0320432433314 42.4493032770053 42.5406888281114  
48.4916117779992 41.6806984441849 50.6360662655392 40.4359177791566  
45.5581356216957 42.0621425894624 41.3321861371202 36.9060997041453  
41.5536168238478

ATP1A4 39.9182914210537 43.3458769998118 63.6334154351075  
41.8778873678551 46.7058093820839 41.3094485574845 40.7910160811527



38.7864161493321 70.6784633355742 48.665578118898 52.8297102061403  
64.3571664944642  
ATP1B1 679.810781641519 627.914461428624 614.603743904512  
120.571680725698 213.768352764473 201.875082892488 559.296669575666  
376.289659542649 427.363555286404 227.94699237549 300.057362423939  
271.478148993789  
ATP1B2 65.8306182796781 55.9269493191353 51.223859150798  
50.378948785456 80.428712610358 59.3618843678775 75.287377665837  
76.4637616585578 73.7873098190297 65.0928075335306 78.3542840447759  
72.5346469941833  
ATP1B3 212.062417120966 207.768377497439 368.390023942835  
442.080188140864 347.247950836937 190.403032965372 246.680724959444  
359.628703006773 439.106576928682 238.584514797019 237.039707901886  
379.280296622892  
ATP1B4 38.5007204246293 41.8073910693411 37.9482157381008  
45.5869891570251 42.6022652963326 42.0574848021044 34.806104801006  
45.3872406432794 40.5912213523345 33.7883338848419 39.2542963855807  
42.357910063876  
ATP2A1 43.4215162178364 40.2093230376545 38.0958223740111  
41.0219290963778 41.3387790895716 40.2851212785573 39.4600924554505  
43.7839209303388 41.1349567921107 41.0657892043496 41.8606936669687  
42.6187506958386  
ATP2A2 465.595459259015 441.872082665398 487.749060801066  
343.892794667047 659.666977039793 472.522115719366 360.523229691604  
278.629995328901 667.583623414832 434.841521967958 519.351335801817  
471.59454368268  
ATP2A3 41.4508241771315 50.7119825096136 49.3780606970538  
65.4068498877665 40.2449343247539 42.808889470973 41.706879587091  
43.1567024035183 39.3506426665347 42.1622837416589 49.6314545328943  
37.3600014814388  
ATP2B1 42.6561897411324 43.0227387991135 44.9174294707972  
52.6040246568056 50.3713170502557 42.4263859458031 40.0668875818227  
44.293922970134 49.0986627051784 48.4365720634326 48.6561813834854  
46.4499258373233  
ATP2B2 40.9201978689462 38.2795150354677 37.0174299366022  
40.7941759414114 39.9042726867255 41.6590564937735 42.2143023923639  
38.9229928131225 39.7107284579423 41.2276963324981 41.0554874392252  
42.4322338033273  
ATP2B3 41.9823787224629 39.0894172982439 40.8833572570383  
42.6111832024096 39.3667161654772 38.2293008890613 42.357910063876  
39.7509165247419 39.853866204927 36.6452480995946 39.6403089864678  
38.2795150354677  
ATP2B4 181.200738629391 124.683201596193 469.553640187203  
180.349984862124 74.5758811681995 446.162602155964 66.0979829658877  
108.616118600231 80.3805507705979 370.779448406233 313.233036704221  
357.44124276077  
ATP2C1 120.240956797301 155.795095438102 144.02257553612  
115.913030448537 179.214713709599 111.071209057746 129.605603092944  
109.326279686847 142.945182805248 74.4393926690587 90.1964013788257  
110.074666148474  
ATP2C2 50.0466349801009 144.954155897343 128.146059846414  
47.6687908290818 53.3086645804786 41.159706131351 67.3976855661302  
54.5125550937898 82.0081006332668 61.8529316708431 65.7587943905649  
65.7853960266587

ATP4A 34.3473914754963 37.5469247328848 37.1643693306382 41.8778873678551  
40.0599807618105 45.2852528185486 45.6042625176633 37.1317006162938  
37.5469247328848 40.3235655331796 34.8383995317036 38.8495095797881  
ATP4B 41.0608773166058 43.3972849968032 39.7847448502731 42.5321207892864  
41.0441816173391 42.9695585740813 44.2753808209563 40.6750540874299  
42.3004033054354 40.5620233728036 41.3945375181463 39.7844133452634  
ATP5A1 1652.85734308754 3800.19142219719 4048.33132153903  
1801.44003951248 1907.47560253019 2733.80542760533 2337.7738990994  
2488.32876359853 5479.94045861143 2435.70120719503 2755.23573327276  
3263.05269150231  
ATP5B 3618.78958408675 5636.93532853955 5566.52516420571 2465.65854657837  
4752.94498024732 3399.75820494572 4569.48246031279 5479.94045861143  
7022.41612496714 4458.76622334251 4277.93019582362 4617.45430247751  
ATP5C1 609.243908604949 598.404003732481 619.337575854369  
401.347734852083 704.15545332905 572.19538884395 657.031980628955  
386.640440174303 949.923102632043 236.374695859748 242.190059393491  
531.36214636517  
ATP5D 407.818713538416 781.223434214089 596.84269596976 460.340300658834  
1137.99307039386 740.994425128952 509.004054793277 563.927521628693  
696.946621824188 882.105892529265 975.544591158047 612.014486689487  
ATP5EP2 4328.723715755 3361.67247904403 4259.50675863393  
5387.08056045279 4503.77675488367 4093.70002166179 3726.73487426505  
6356.05807792831 4948.93803183911 3253.86278287661 3575.78813099057  
5354.58328030315  
ATP5F1 527.97309138633 828.403901345618 955.088515235485  
662.848386826617 920.504890206997 713.685405035516 661.269882993465  
641.103199748891 1083.50383916482 541.105845300009 611.538630852232  
936.978983469829  
ATP5G1 387.311743342483 273.764998628636 327.631923082696  
285.826380698286 453.652548085387 277.244576031507 382.940842652744  
574.14982128922 437.280601907944 459.546279672649 443.269396125834  
426.622204035624  
ATP5G2 398.229956085523 392.622487173359 608.73319976638  
340.553073657744 223.850148640071 419.360641528378 369.258587948416  
761.341795853104 565.411298018845 507.375704144286 455.223217772744  
585.054570630252  
ATP5G3 64.9367707455078 76.4439037944547 60.3973027611091  
64.2130157241811 95.2833228196616 74.5405407002217 58.5087296620514  
58.3046521633424 60.8635925649592 65.9189023794337 62.6048727240291  
82.9467575626263  
ATP5H 1792.42490815074 1195.24078948059 1433.1813604069 1287.41527826233  
1559.50766982801 1390.12380748446 1689.77066894108 2002.0536042686  
2133.78836857697 1645.71527614542 1493.20520979227 2124.40034922306  
ATP5I 903.756866967447 1320.7894611262 1089.08276262641 1243.32650314893  
1043.26325848938 1372.51401036753 1473.52943897204 1330.19215036764  
1480.95754707554 1789.07186722972 1570.45778081591 1607.73526966988  
ATP5J 753.976423227915 901.793120584383 1311.88650141004 842.82310025167  
1080.43016747082 1366.59129560817 834.14766574977 1086.12171444149  
1349.09482344633 910.898566308567 843.078502001733 1384.80615431656  
ATP5J2 1171.207937488 861.427193617946 831.578043520215  
795.381998233245 1145.59111340228 594.611678976716 993.626865290891  
1255.10866316499 1554.42895572029 763.947361966861 798.996494242432  
871.238169066998

ATP5L 953.143041145545 771.554891868456 943.73554571528 1055.00793806075  
1213.3477481374 1234.59589464045 985.328482076985 1064.35745220225  
1313.92053019421 723.210613328966 816.746599467159 1275.78715071615  
ATP5O 751.953794043451 1056.57081612661 1513.74711975248 866.712228831149  
1450.53108586858 1398.21942794938 812.386878774445 963.74601421037  
1105.00321488322 843.333981146512 1087.75682788799 1601.52194699063  
ATP5S 64.8254097948745 112.202543937743 116.530589514041 83.4756142147167  
73.6965494979349 99.9486407529027 104.076098789396 79.7733480606334  
83.2925226467532 75.7427148831879 81.7117547901526 79.4710406831985  
ATP5SL 335.002151198999 440.93348620369 357.839241226513  
263.587821561589 467.351570171652 509.463928291526 580.444451816014  
305.399644617845 543.975237512604 440.93348620369 446.902178094675  
468.98857415608  
ATP6AP1 1801.44003951248 1428.47642890543 1615.83220398811  
1349.09482344633 2294.75523373329 835.171475474151 1645.71527614542  
1945.33618761041 1364.06060391538 1585.90718459092 2024.4791883541  
1119.11683235081  
ATP6AP2 805.590413262364 651.969296681551 814.643009598624  
889.638287212686 483.882804472844 591.192020333181 549.67905283016  
740.423874031773 780.708896888794 548.217757366495 593.345148568451  
730.168814097451  
ATP6V0A1 285.826380698286 229.26498093497 369.717462266442  
315.880072026714 311.361885152025 286.045253557021 238.510952165358  
266.250887288858 231.859167242606 230.197573134703 311.055487966495  
219.431561967403  
ATP6V0A2 112.551747307723 87.2351169088172 91.0443726041992  
130.274451794636 85.2849531543957 97.4062608315831 91.3607028449916  
93.2402285327166 124.397048303668 75.2053836356882 92.9820860411485  
74.2748495231478  
ATP6V0A4 100.114114765033 39.9697332660833 40.4070046183108  
41.5464765641928 41.7426502114261 41.399074748665 43.2721716572958  
44.0839329808106 40.5497440764264 42.4594149893798 40.5090849993014  
41.9159449067072  
ATP6V0B 1184.18994044558 814.294297312057 493.322302312578  
1485.68317899614 702.737741114234 431.727858902449 936.978983469829  
924.316085565917 1007.03747721563 510.232992765054 471.59454368268  
397.745727767552  
ATP6V0C 1135.43644148537 1223.01485352248 1390.12380748446  
1907.47560253019 834.14766574977 766.647626178442 1052.16097214718  
731.071171171638 1097.92519921873 1055.69506483576 1335.4111951034  
852.769974690777  
ATP6V0D1 386.00975855841 366.716775127375 539.32996290794  
887.118866402149 279.063292799015 383.190278161083 320.555790243104  
300.803955139552 406.417924060562 296.463473585355 400.8670859408  
265.728967648382  
ATP6V0D2 44.0328992213727 39.2907645923217 39.0775870687758  
44.1483976313959 40.7779767565889 45.0882356578404 39.1539892144371  
35.2642250366721 44.3440839686558 40.6022003765153 36.7283081422707  
37.9607839934735  
ATP6V0E1 1638.16317738035 696.113365766871 983.972164685474  
1762.93413846062 796.359355922952 902.691776563423 802.036670929858  
1217.21440297138 924.316085565917 1045.20336057833 1062.93431683428  
1241.21734508421

ATP6V0E2 352.917938567734 216.1413998895 121.650910373947  
212.813224717262 1132.19026676901 305.279475274196 1057.44729389649  
605.338871441599 536.013150313097 182.905368976291 211.137455821181  
166.304210248623  
ATP6V1A 615.442484911026 645.702744916884 759.184121753305  
1325.2479053325 636.367246129079 441.5479786095 469.553640187203  
448.508714709248 501.319993127353 459.92905629125 589.685739519627  
509.463928291526  
ATP6V1B1 182.411383422586 46.8236022402545 73.2814174739782  
54.4586176399381 74.9113162056974 49.2050538150106 60.0981687048269  
124.18058128276 42.9020321355927 53.9412154719864 46.1673159982664  
50.0571060701893  
ATP6V1B2 1202.11455437028 501.817654561915 855.157599239267  
3465.3013599062 371.167168940365 985.328482076985 542.467997217663  
583.915973546284 432.001201940414 764.571579067138 779.996851709716  
659.396637478356  
ATP6V1C1 102.952512767439 87.5002066150725 64.4588422949237  
142.48688219605 48.1473938886239 73.9456720099807 64.1777305915695  
57.2350830635912 74.9741052063425 100.849815617918 88.4594321382477  
76.6094442444074  
ATP6V1C2 82.7351935657355 38.3322849790657 41.2365089689635  
38.3668692419741 38.514058966346 35.7034203372528 41.5817737564592  
44.0390019242862 39.4433784795209 43.6670755115848 34.9023759742338  
40.2237056928605  
ATP6V1D 874.419252731128 288.869882644391 669.419736252343  
931.401929277001 303.239819890428 512.255695437272 401.403103922907  
510.056072375132 417.4609354305 558.451033789799 549.117045813593  
875.139073253298  
ATP6V1E1 1557.42399344934 1052.16097214718 1263.76838179117  
1640.74027400791 612.441960343995 1236.32289322872 1137.99307039386  
1073.84987604662 891.080174768895 1549.93897368117 1239.68399088145  
1466.88103496067  
ATP6V1E2 95.7571966348067 67.4018925617901 80.0183739952818  
51.3851157261451 67.7155610106537 54.4753345912615 57.1070449050465  
74.383456365584 59.9108736364178 71.9124897002253 67.3976855661302  
60.3816817102326  
ATP6V1F 1252.94510628089 789.511653564341 856.790359133679  
2071.90741263566 1058.61208471961 962.079396754147 950.740991182127  
801.694261678224 809.577874019028 841.850722284484 884.036280777358  
974.296760034984  
ATP6V1G1 1634.61795848352 1570.45778081591 701.168333137671  
1382.25775340179 763.947361966861 862.031722874406 1731.19220270448  
1109.17675353971 975.02086340962 1250.15619347362 1379.51119430451  
1271.62760896761  
ATP6V1G2 51.8781065691038 44.6360645306497 43.3465699185405  
38.5707420487455 46.6397391251762 57.013135787334 42.0605906240248  
40.0965255448873 40.2274522635576 45.4882438975269 46.201352759435  
48.7814131120945  
ATP6V1G3 45.6517320730042 43.9783383422823 42.0621425894624  
41.8778873678551 42.7489468897708 42.1046072075724 46.1634822993009  
43.4544762830742 40.4518431978241 42.5193208629123 43.9802831041664  
40.9683275553869  
ATP6V1H 171.270750760376 301.457545514208 156.69976952483  
205.021644155954 142.532754436212 172.433936159136 373.626843592567

112.930164222877 172.506486240017 137.294289316915 138.859992681388  
150.562062400737  
ATP7A 59.7179445506128 53.9275079525238 81.5782824513693 65.084620579901  
48.6224651100733 63.2343637481705 76.7483302168542 66.295597720304  
84.0899854321388 92.3388129097482 87.8967913380047 105.699748702315  
ATP7B 54.5921287593554 45.9732108120834 57.0427273538849 45.9441733841041  
56.5933259268408 53.2874286456249 57.7096546601208 52.6654109976514  
78.1448136847078 58.6652401079158 55.2828387400799 63.0733654065132  
ATP8A1 34.2180669723984 44.8529259387308 40.7620472083159  
41.8778873678551 44.5668141895992 40.9506062495231 41.253645578517  
39.9576138799997 39.853866204927 40.8049408996274 49.1868644496737  
44.0451487108213  
ATP8A2 54.3554233228353 49.83247261979 48.6037684272115  
47.8164193292842 50.6470461863549 44.1737502492846 46.4388841354122  
46.3685439301234 41.9635525160083 42.785429206422 47.3791873993182  
45.7562276914441  
ATP8B1 50.6473771879221 137.955007835039 127.836645375421  
41.8778873678551 88.1199908664065 59.8102324370568 142.789889238338  
63.287067794195 167.678403380953 119.747995520476 145.267770598988  
119.700522283289  
ATP8B2 47.9175508887533 48.675318481211 42.4939802311136  
44.7520317855773 41.5421429082231 67.2968280876013 42.57175366709  
44.2580151149956 43.802800826921 43.4598349902811 46.3563690926644  
53.5819170097952  
ATP8B3 44.2350046179299 47.8400694856726 50.5089777244781  
50.5310598656998 39.9697332660833 47.0027453663546 42.1607322031054  
52.5098795466615 52.8502823653368 42.0621425894624 47.0940613507321  
46.0633179231318  
ATP8B4 98.6766028183598 72.0792554308917 58.637422084759  
220.977092747428 55.9283039581662 230.879083362388 66.6894494536346  
88.2568398791731 52.1788489555942 113.090530993447 100.883604376864  
95.7383730980717  
ATP9A 455.774407260725 255.68068369366 263.387877739079 106.15531508764  
154.811704749343 228.08291792003 330.096171705212 544.946796643478  
250.65667565007 737.604036996153 594.611678976716 631.632335640448  
ATP9B 53.8856501960117 48.8584917918986 56.607199625498 62.8201270538435  
46.6397391251762 68.4323624797175 49.540449125788 45.2806199505029  
69.8899273527731 82.966263655525 76.153346954349 56.2804354745795  
ATPAF1 144.711001798454 128.596547789044 142.124053129543  
98.6825522152097 177.757247913754 157.9970294734 162.32721608943  
146.681796324406 187.601223003233 180.15711251649 119.528720998614  
187.331614826395  
ATPAF2 55.5276281380084 56.1355483199198 52.0742951366864  
43.5627649099623 58.4383854340181 53.1052228246467 53.4921736109774  
54.720204938924 64.9030399249327 49.8393069675192 65.8748459696377  
79.5898953726467  
ATPBD1B 155.982503792091 117.239774193934 101.494432845825  
110.666686474986 151.451107406752 116.51037006692 168.561260174501  
176.866350130563 144.098339910117 271.529471399941 205.187554095744  
208.878921620914  
ATPBD1C 39.0620487644635 34.5023764006976 39.2707964550441  
60.620259884953 40.7779767565889 35.314469458379 42.9803717121865  
40.6171774724171 34.9428206949566 36.4651112441576 40.723990462047  
37.3600014814388

ATPBD3 56.6951078698291 46.8954576545929 45.1569741609597  
44.1483976313959 63.3638417360105 43.1826328292558 59.0457625163577  
44.797320243931 61.3733228199803 48.3693338695392 48.8088340735921  
50.379587451669  
ATPBD4 51.6159542017038 47.5203201376024 40.4070046183108  
42.9358255168086 64.9072331703985 53.63657997649 55.4004611309636  
44.4031868028216 59.3164315859919 54.0917531668054 57.2674335547631  
64.4766262198475  
ATPIF1 115.357402077859 140.076084766156 171.746499373501  
143.973063517706 193.897678586782 109.137372445043 157.9970294734  
212.712025285843 200.174103125152 135.540738841602 129.320408155239  
131.90520406914  
ATR 40.2216612339451 52.2759825608835 44.2698656253406 40.7910160811527  
42.5428186846763 37.0747059730919 39.8695929627783 37.4484310268909  
43.2047465154928 40.2579040125416 38.6355088942179 37.2810767789306  
ATRIP 100.057155418659 88.0720840588632 96.0126406688619 113.179313022693  
183.702709922933 105.45765455249 152.824869071575 103.302837652919  
108.525500270474 127.61938370689 106.340844838265 82.9467575626263  
ATRN 63.8273035273651 71.501028931626 80.4554147910354 72.149478755262  
83.6935756500468 55.5789922793469 66.7475567712242 58.0892402609917  
70.4262478188233 70.3629652777935 71.8887764487177 70.1184116246724  
ATRNL1 40.8681871019812 44.6918600441328 43.7630587657205  
40.3180310664156 42.9090346219023 46.0364000143537 43.5627649099623  
43.3262148375525 39.6609238036815 40.4136535208406 44.4688999098904  
41.2437378488025  
ATRX 38.9152309941518 43.3458769998118 38.738305958734 38.2516470858206  
41.7503755215516 42.1095407186921 40.9157352260901 38.3194261431961  
36.1537607600257 36.9948667320377 38.6662194645633 40.2669497398702  
ATXN1 68.8005532048281 47.5870162399764 60.7530213660442 77.5091723127198  
48.3814421939888 88.2639730639822 43.1931731665131 60.9801094225351  
74.6110659745477 92.1908585323292 82.2519263268941 85.7908542452355  
ATXN10 53.4921736109774 55.2485665256307 55.4502804236424  
44.3638402537972 67.7155610106537 71.3272569463294 55.4004611309636  
62.3524254253348 57.1401776589964 70.6138659908885 64.7598303406649  
71.7937709257351  
ATXN2 498.958550919515 547.888464549389 544.946796643478 358.779372054826  
562.798580332885 446.757901018137 551.915864019927 430.868309653765  
612.843402058384 943.73554571528 814.991871217268 765.145138238955  
ATXN2L 50.6937447392501 52.1062000766427 63.104563489528  
51.7074776656716 63.8810437279875 45.9972262774766 47.6773473969653  
59.9968592852122 49.6011834770324 52.0237462570423 52.4212131710421  
48.5544398725959  
ATXN3 90.2721521466478 65.8082111065882 99.2100734209486 116.927619635255  
76.5375674421131 89.3168921945222 94.233414682323 66.4207938873541  
80.1505160355175 78.6402083787251 87.069143362676 106.5477041881  
ATXN3L 39.6609238036815 38.2263227947189 45.063792968927  
39.066284740632 35.7973685350741 36.2768299545794 38.0598374201407  
40.1474543172332 38.5252456306656 46.325232414659 43.401782064778  
36.9976231206067  
ATXN7 41.3387790895716 39.0102066700839 34.1806289878747 33.3231576795423  
40.3452320167286 39.4953494583071 43.4544762830742 38.2782436497441  
41.5635499110307 35.6208308220005 38.6662194645633 37.6557714476853  
ATXN7L1 48.9906383294199 43.0971787292711 52.9111155236961  
59.8102324370568 43.4544762830742 44.8872784170036 43.3262148375525

44.293922970134 47.1744296124496 42.1622837416589 50.3221380889396  
 36.8690774823319  
 ATXN7L2 68.5457752893587 86.8262463672891 63.1450855271137  
 45.1944222548351 98.0143500562821 48.9826868640753 70.2635892414678  
 60.2691630545162 70.3613168347492 65.813547096222 64.898351831341  
 47.7962548556026  
 ATXN7L3 375.697071471585 411.981987305512 329.677454924062  
 260.824949424185 432.512515345015 208.189151365575 393.001025840896  
 284.105466865264 463.527266972118 253.527553472516 290.316757790733  
 207.087723777954  
 ATXN8OS 42.442231667357 41.2598458726002 42.157627240486  
 40.3180310664156 43.844855336215 37.9003288112261 40.1235656101329  
 37.6557714476853 36.2733735494625 37.8217989841918 41.4508241771315  
 39.9519547348106  
 AUH 90.4512650366645 153.139323479953 95.0738959950301 96.2385885003071  
 75.8306078651291 116.253417059012 101.716697533604 85.3842287274022  
 100.774098314706 74.9113162056974 107.538934056558 139.472956453414  
 AUP1 99.2432911346944 97.3813557754832 112.811643697986 111.771533072688  
 154.869301720717 80.8333046859586 117.260454792593 135.829530518199  
 115.271200532229 117.921615219634 99.2575888644764 97.1271615802556  
 AURKA 201.301705082976 231.824347524066 145.459578481501 122.316617618658  
 452.139416552986 98.5609311953771 370.917477324773 179.779145453083  
 290.261616334371 66.3956936248447 53.4921736109774 58.3882937676176  
 AURKAIP1 1480.95754707554 1387.28483887704 1408.59798540643  
 1232.7632290973 1985.3999418878 1188.3486464341 2067.66516256598  
 2294.75523373329 1537.76265834076 1478.26733379357 1483.40077183826  
 1125.31394383117  
 AURKAPS1 41.0608773166058 43.683792219729 46.3411353377615  
 38.745552403895 47.8075998240396 41.2567470068038 53.1884505015411  
 44.0390019242862 49.0986627051784 45.4614234442527 45.5707650534259  
 42.4607795638552  
 AURKB 172.89937021234 321.171736253617 214.537530518962 79.7937658787441  
 361.57814355509 73.0247140074919 597.996273468244 237.532800487032  
 348.757322819568 48.4890615340603 48.9754340235127 52.3896785600751  
 AURKC 40.7609952437622 52.3432130135266 40.641503836284 40.7941759414114  
 85.7842344710572 46.3715909653832 38.9733632798532 38.0240760521689  
 41.9180247412837 38.957687788868 43.4370048647278 40.5281496800812  
 AUTS2 304.777565078155 115.221134337342 220.398778650109 163.718576695806  
 272.545033107746 262.9072085191 219.134220280612 244.736442646499  
 437.015713629277 522.377154567257 399.027079798213 282.196234758364  
 AVEN 68.8698243753339 60.1102859845739 48.1331309338997 70.2541961995753  
 80.428712610358 77.8490019489375 55.5578334877425 55.421880601441  
 61.5807110546718 61.1851254827343 60.1466326805616 72.6182747525443  
 AVIL 52.109723558511 52.4351670989268 48.1997158668729 52.6947911480086  
 47.3172462673426 42.6575535390785 53.7423898357583 42.157627240486  
 48.9931786790166 55.0016608333828 46.7386599624801 42.9887069977696  
 AVP 48.0201377454632 55.5867487811643 57.9279989359711 54.5125550937898  
 45.5198200633333 44.5917081663148 50.5252048155459 47.5439485437351  
 48.7646976789783 49.0841460667818 49.8135461150818 44.9734311311394  
 AVPI1 345.443895623911 402.221227674218 398.229956085523 635.52621743309  
 302.465485470899 356.133736281036 279.521995263196 858.975085087497  
 332.830805115112 2528.6392272518 1122.44489338159 1266.41536472956  
 AVPR1A 42.1537476443423 43.1805016690297 43.0971787292711  
 36.0481934423077 44.3557408297309 43.9724628401189 44.0687697278114

40.5158867964016 32.8704945047196 46.5650556481721 46.7386599624801  
40.3691324547049  
AVPR1B 35.6111578834671 33.4967065724734 31.1853651446075  
42.1273928203021 34.0045980663271 34.0045980663271 37.1643693306382  
38.079222289614 40.7847110517594 38.745552403895 40.4504608195666  
37.1747156131306  
AVPR2 38.304249186058 35.6434124419782 36.769073068743 35.1451084093692  
42.7107928951766 39.6251842352088 38.5066108855005 41.5464765641928  
36.4476883897928 37.7315666632629 41.6336636285875 37.9607839934735  
AXIN1 206.514263103112 233.263058459431 304.133852957499 144.998604924513  
226.804294585045 203.808195515747 207.957319374194 106.398825125486  
218.819478568299 162.628603963754 176.224645007435 148.781721594419  
AXIN2 148.595294991115 476.653723741096 287.423909789368 89.7554896946341  
81.0259717888094 255.087214364926 248.194954741095 67.0904616289706  
85.8154958329408 341.206585871289 364.439669236186 188.099292617901  
AXL 248.797398220982 105.257627491307 94.3953345963359 162.721587349434  
98.6553805168141 276.795797048951 52.0942589368478 208.97126697486  
50.6346949248834 303.818507395434 220.426780242132 210.485586903711  
AXUD1 478.939577875017 762.855719373733 518.074074000609 3253.86278287661  
438.22469176123 2745.8277126123 672.515393219419 1545.76489731307  
291.785618741057 675.832363405287 688.168272082335 639.391575249793  
AYP1p1 78.9028182143923 71.3015974749703 91.2769094348604  
118.911578268073 118.49449420132 176.670909065664 140.264270771578  
156.636360703756 76.2591822114739 109.654559065946 99.1952492360239  
100.567309348016  
AZGP1 42.0532901689036 50.0425298550559 43.4709415392696 37.8442841690502  
70.6903168772326 49.7458652239071 42.7431359850339 42.8482181313226  
48.2123120250343 58.5087296620514 54.8532558909227 54.0374522273907  
AZI1 141.043326064913 249.451753363306 147.498355916596 82.7394574977114  
248.321641540666 95.2367177680328 200.986069552443 280.239058266018  
111.291087721139 172.990533342251 129.925137664962 86.0735583144514  
AZI2 67.9531693869426 74.2653431904071 63.5107036952143 137.555275829874  
61.954674965065 141.594428857706 63.3924515518667 55.421880601441  
68.2372031645261 86.7076796107636 76.4389426517528 85.3431175579775  
AZIN1 400.973553604192 291.42149037871 212.664574366477 310.706520144173  
233.96534264787 323.780380243759 251.299662213686 156.02592319461  
324.320137371059 210.133037772969 193.806701229141 284.575587310164  
AZU1 36.3649677956953 37.4540772310118 39.9101908547397 51.223859150798  
47.0954207417646 43.7630587657205 32.9962272670005 40.047314525032  
40.4997186069494 40.4136535208406 41.6336636285875 38.6454098044474  
B2M 4299.4451139256 3761.48462220262 3263.05269150231 5636.93532853955  
1339.29022988209 2323.81110653289 2146.1548633579 2417.02418518222  
2745.8277126123 1618.92099084622 2506.05102956991 2611.32405374107  
B3GALNT1 157.658760470424 104.361353204648 274.134201700259  
53.2046867327331 102.655050997714 77.9820921829024 83.8811735017279  
118.259459346012 164.735191308776 144.427680369554 109.758297200083  
175.652989203497  
B3GALNT2 65.0721641331632 56.9312835667828 65.49167373382  
56.4578213622965 82.6157566292355 87.4239220649478 54.4934782594218  
57.3286965007828 65.644767142472 71.5032996449402 67.3976855661302  
76.9953921834156  
B3GALT1 41.3387790895716 46.8236022402545 42.2577689927563  
48.856176220627 44.6834648302383 45.9266745571724 40.1235656101329



45.3872406432794 44.8003345643334 48.8623729374733 40.0766543123257  
40.3691324547049  
B3GALT2 36.0144420013819 36.89524015739 37.8386378737561  
45.0798408927912 38.9496515344837 39.8455060654531 38.2933870238743  
34.3865306339645 39.3750969348308 39.9948390976317 38.6662194645633  
47.2131144508464  
B3GALT3 46.2231598401576 47.9665737016961 70.4014100046391  
36.5393857306744 48.4724651632766 39.6251842352088 41.0871827071116  
37.9837233601316 50.9612733880858 40.0557788909923 38.5252456306656  
51.2776048338  
B3GALT4 150.801729138762 116.295564219236 126.017900743748  
128.635811501506 55.4919197421746 76.1019439127881 125.184689092836  
123.506372870621 152.605418131968 131.645714321903 115.88156897199  
85.1114448808779  
B3GALT5 39.3303857231606 40.3180310664156 38.6727842796202  
39.7411455670172 39.8238654968211 40.5281496800812 40.4995052849302  
41.0920120134247 42.8414096678708 41.4606714407332 41.9083581529276  
37.2810767789306  
B3GALT6 171.501864800548 106.8866235778 124.94083215058  
120.436827608155 87.6178717341967 93.3718038663074 146.840603547323  
135.540738841602 136.644759501653 170.150808455621 158.408644964483  
93.7924763988692  
B3GALTL 51.1740855632044 55.0897019602305 56.4779645313958  
63.4531374125233 61.3077641493507 61.3620062177524 88.9430141071732  
52.0503062610092 69.0037087543684 69.2963913574682 53.1505787220552  
68.2309359831273  
B3GAT1 45.6517320730042 40.6380495994768 41.9335763813389  
43.8002456102021 43.1833429589719 43.2427390263564 54.8946088631931  
50.9933795450314 41.809704036355 47.4439407315335 44.2925355984056  
50.7487159427973  
B3GAT2 41.4508241771315 41.0678614026819 40.1985790927248  
36.5393857306744 39.2608760193011 38.2293008890613 39.2533668167483  
36.2539950294089 37.8319142847141 44.3648993568405 41.4508241771315  
42.8864415494484  
B3GAT3 112.865496075486 75.6614221167993 126.578693258328  
125.114613377133 117.893268074013 92.9820860411485 133.344625514809  
130.184962393833 78.2393202422664 138.765621737736 147.579873410455  
91.7906797118637  
B3Gn-T6 35.2267149016596 37.3634897565502 39.1799070031819  
26.6357008041456 34.5301949364147 48.7781962164988 33.5578650644246  
33.0038344711883 39.853866204927 42.3606390470387 34.7308008643142  
34.1509644696334  
B3GNT2 83.5646728968172 101.634888749356 117.355761277966  
85.9087280306456 94.6432868887401 76.5888466260562 84.9182861692273  
66.295597720304 86.0735583144514 54.0374522273907 55.3147456054175  
61.356483470053  
B3GNT3 43.9309845324767 47.2770121962655 45.7968648044613  
33.8111782249716 44.3557408297309 36.2015763253919 38.4005795891396  
37.4484310268909 47.6195009345747 43.6033221838149 45.6348103033479  
47.2131144508464  
B3GNT4 42.7150227340364 39.7835513496873 41.6977706798234  
38.8495095797881 34.7018263647985 44.6524308640784 39.5496902678788  
39.3709357615493 45.2897806651929 37.920964499903 41.6336636285875  
38.5279745308203

B3GNT5 45.6517320730042 40.716553247236 45.7968648044613  
65.524821699432 39.9697332660833 40.9506062495231 53.0277416531043  
69.3468840908665 49.2879849674517 40.3235655331796 38.4689132737495  
44.6484005362281

B3GNT6 77.6056319020116 80.173718023183 86.7823828209946  
72.2577390063259 108.607805039005 130.336599857526 78.080034922779  
75.0377156190383 79.4528447794527 117.502489192855 107.792406701643  
88.8330881965986

B3GNT7 38.1169703906207 31.3542159583213 36.5474283500601  
38.2041059863839 36.08956004634 37.9951997351435 34.5633623842083  
35.7973685350741 43.4656637536244 38.3092241935352 35.2339574411711  
32.7043743065388

B3GNT8 96.0907205856398 52.683711208052 51.223859150798  
57.4595416719581 44.4489662507893 59.9876575158981 48.6395795163502  
62.4219686957673 72.5027069303875 67.5503668962444 71.1607965028029  
60.4872675915085

B3GNT9 40.0557788909923 41.159706131351 39.8299340037009  
44.550322123994 43.1252272136667 38.8336427948187 39.4600924554505  
41.7419877611072 44.8003345643334 42.5664883002833 47.7535797917441  
38.0452862258803

B3GNTL1 58.0139597055449 59.2643906275025 47.7737810047679  
56.2508140932179 54.5683518971261 48.1591264215184 54.339958888486  
56.2441895183416 67.3230935444252 60.4837400912239 62.8408273986904  
54.7953298048942

B4GALNT1 43.2724556187214 41.159706131351 37.3687900733549  
42.4580504587581 46.4343327861696 40.3357777530419 39.6535880152834  
42.0494116081998 34.3842972343227 36.8059561571675 38.956280281655  
41.2437378488025

B4GALNT2 39.3709357615493 40.6380495994768 35.7105247506212  
40.8681871019812 36.6354013629791 36.3845892764084 35.0305278582179  
38.4540849632254 41.3803269429468 36.8059561571675 34.266241549578  
40.0557788909923

B4GALNT3 36.1232327599945 39.2907645923217 38.5045333213784  
36.0481934423077 38.1644569189523 39.2248354955045 37.2892641289258  
34.8949555140527 32.2133093774284 41.1222709786153 35.1470994647364  
36.449101775775

B4GALNT4 86.9816932158186 65.2001674269291 33.0260566875355  
34.7266486944713 130.184962393833 40.3357777530419 59.5205055437765  
56.9299697426319 52.2631308081333 41.5435611403119 36.5359455830388  
40.4639532172338

B4GALT1 189.737472782071 101.351907645804 78.450972383987  
110.25582862843 101.738441694376 89.3168921945222 162.160380044249  
368.246708866999 115.001179779307 124.986782737446 175.099998331811  
106.5477041881

B4GALT2 39.3709357615493 43.5873188565519 40.3384318592985  
42.1273928203021 45.1846041469628 40.5710637884029 44.2637911785804  
42.6975474602554 43.6177016821274 40.3519145017156 42.5153507543837  
42.3047762223294

B4GALT3 509.463928291526 460.340300658834 501.234159111283  
197.720854621428 1030.31910195147 232.147792636393 473.688869614777  
374.427492246826 1252.94510628089 313.921236120658 263.937966521917  
257.584248252408

B4GALT4 130.313381811168 184.989940464859 100.305262467668  
89.0684909049451 211.485592971588 91.8295472317386 104.932630862885

|         |                  |                  |                  |                  |
|---------|------------------|------------------|------------------|------------------|
|         | 174.905877478501 | 176.02137177982  | 110.729504563799 | 122.203872796773 |
|         | 111.357508398822 |                  |                  |                  |
| B4GALT5 | 402.412173952792 | 364.962649416567 | 349.030389220324 |                  |
|         | 755.852629128252 | 504.847507464269 | 509.879213331349 | 407.564154455615 |
|         | 455.223217772744 | 400.093769705765 | 424.709002690579 | 573.613497159192 |
|         | 702.737741114234 |                  |                  |                  |
| B4GALT6 | 43.5710871617107 | 34.8137085420423 | 41.0356368374708 |                  |
|         | 35.8472302065546 | 44.147557390293  | 39.132725377815  | 54.4934782594218 |
|         | 97.1271615802556 | 40.9901805728485 | 46.325232414659  | 40.9157352260901 |
|         | 44.2527566343661 |                  |                  |                  |
| B4GALT7 | 239.838643553139 | 155.099281008688 | 250.176074707634 |                  |
|         | 178.156332261759 | 181.200738629391 | 156.445000453282 | 178.012676342712 |
|         | 229.035497774884 | 260.698359835873 | 216.744244428166 | 336.737571879156 |
|         | 202.833844963097 |                  |                  |                  |
| B9D2    | 105.739423435604 | 92.4953883194488 | 76.6914642534934 | 103.961956810572 |
|         | 90.0157406552551 | 71.3932787152381 | 120.401643722713 | 99.1438953564062 |
|         | 173.212430860273 | 103.808640431626 | 87.8967913380047 | 92.084526929319  |
| BAALC   | 43.632365631458  | 48.4980626712175 | 44.8872784170036 | 45.9441733841041 |
|         | 38.745552403895  | 43.3785777889265 | 40.9157352260901 | 41.8417024632349 |
|         | 44.293922970134  | 49.2317401696588 | 46.824299585607  | 44.9070250604284 |
| BAAT    | 39.0620487644635 | 36.6002100641539 | 37.1643693306382 | 33.8111782249716 |
|         | 44.5668141895992 | 35.9305494063137 | 35.3362091871364 | 41.4508241771315 |
|         | 39.0775870687758 | 37.0320432433314 | 37.0180934800573 | 37.2810767789306 |
| BACE1   | 49.6241203903354 | 42.6939394537076 | 43.401782064778  | 48.2465811839557 |
|         | 40.9416717019827 | 45.7300501624017 | 37.6502409810897 | 47.2368301203382 |
|         | 41.8197029429821 | 48.0756651489012 | 48.9184531207247 | 46.6681271693877 |
| BACE2   | 82.0081006332668 | 78.5174639327946 | 132.036058401203 | 65.9703614596867 |
|         | 64.8367546135053 | 77.4812665677338 | 99.7529382840954 | 99.9896394343368 |
|         | 88.4594321382477 | 61.8529316708431 | 63.664265793911  | 69.1743062945144 |
| BACH1   | 42.5633441928261 | 41.9548604205448 | 40.2382908228517 | 40.5018032884134 |
|         | 41.3331561144087 | 39.2985791324641 | 39.0831492773955 | 41.0381860307445 |
|         | 40.0766543123257 | 40.162771030532  | 39.0775870687758 | 39.8845726397282 |
| BACH2   | 43.1180113655693 | 42.3138951003676 | 41.4534762662066 | 41.6564075217517 |
|         | 42.5534565507139 | 42.4058515827212 | 36.7356360093603 | 39.4987030972173 |
|         | 39.1790517315259 | 39.4012855594431 | 42.7762820332795 | 41.863927676552  |
| BAD     | 92.4449920876332 | 97.822911929574  | 88.5907320965949 | 81.8242150474253 |
|         | 185.94424664238  | 152.545682001987 | 159.76714232068  | 112.328675926999 |
|         | 131.57403028894  | 118.410983614453 | 114.215602320391 | 87.275548276476  |
| BAG1    | 44.436995101921  | 61.7572675712557 | 52.2132783757422 | 46.4555908533915 |
|         | 57.2960245538881 | 41.8613406887824 | 44.6032218589199 | 51.9447450229707 |
|         | 56.7991853808475 | 56.1912096308988 | 52.5930185400362 | 59.5875857071693 |
| BAG3    | 301.025314855652 | 305.339554034294 | 364.337811621248 | 254.066741436612 |
|         | 324.582288788326 | 749.825513359683 | 241.202687910704 | 235.764999941441 |
|         | 305.786520619504 | 222.453547273598 | 274.328990210853 | 439.955651727755 |
| BAG4    | 48.2910530887214 | 51.0612189196487 | 54.3554233228353 | 46.614092935749  |
|         | 51.7983110178095 | 46.8319561350724 | 44.5390641547628 | 48.1591264215184 |
|         | 46.1101825640108 | 51.6778366958973 | 50.5810338885769 | 51.9447450229707 |
| BAG5    | 202.957014793417 | 95.3507664364654 | 132.931052537195 | 103.276116332402 |
|         | 124.738024302128 | 129.268600210689 | 131.537639104397 | 148.059385111127 |
|         | 160.499410146402 | 157.9970294734   | 144.609635554528 | 130.498680522614 |
| BAGE    | 35.9305494063137 | 44.3529919625344 | 44.7829632472754 | 33.6816578730693 |
|         | 48.8381507187986 | 45.7300501624017 | 40.6750540874299 | 43.9366081640576 |
|         | 46.2027193115397 | 42.8936990772838 | 46.4205654140754 | 47.5025821041537 |

|          |                  |                  |                  |                  |
|----------|------------------|------------------|------------------|------------------|
| BAGE2    | 38.385865183581  | 45.4143854024453 | 41.528370959196  | 40.1804147506786 |
|          | 38.6454098044474 | 37.0180934800573 | 38.1793598983615 | 38.5457716679071 |
|          | 39.6609238036815 | 42.785429206422  | 41.2598458726002 | 39.4490233720848 |
| BAGE3    | 42.1537476443423 | 39.0894172982439 | 41.1367478979484 | 40.8681871019812 |
|          | 39.9697332660833 | 38.4330755397458 | 39.6535880152834 | 36.5393857306744 |
|          | 41.1742244762318 | 38.6454098044474 | 45.0589947942306 | 37.7526485343328 |
| BAGE4    | 39.9220998751503 | 37.3179578037963 | 40.0557788909923 | 38.4208429103799 |
|          | 37.6119337673806 | 35.3502070248613 | 39.0759686770589 | 37.9837233601316 |
|          | 38.0702079388879 | 37.4302011516587 | 36.2885860224741 | 37.0953622406687 |
| BAGE5    | 48.6621527194963 | 51.4413099192899 | 42.157627240486  | 51.223859150798  |
|          | 51.1368583672022 | 49.8472708021525 | 45.4799270968969 | 48.0582855095143 |
|          | 42.0621425894624 | 44.1379638573455 | 49.319499137678  | 47.9566297250148 |
| BAHD1    | 37.7384958256497 | 39.7835513496873 | 34.9849896310235 | 35.49696651597   |
|          | 41.6806984441849 | 33.7818132446042 | 42.8684958525042 | 38.079222289614  |
|          | 34.3842972343227 | 35.4990901121893 | 35.6041926503637 | 40.2669497398702 |
| BAI1     | 41.483412492426  | 40.7623977968067 | 43.1660110696573 | 40.9165100646088 |
|          | 41.2507419031133 | 44.0804700754786 | 42.6758568421347 | 42.4026480597025 |
|          | 42.4540072551568 | 41.5852317867787 | 40.5090849993014 | 41.0136069709699 |
| BAI2     | 33.6902293666089 | 48.9259041798949 | 41.1367478979484 | 42.0102671859606 |
|          | 35.3327761997046 | 39.2985791324641 | 38.5066108855005 | 41.8417024632349 |
|          | 45.9227107476843 | 45.4614234442527 | 40.723990462047  | 41.4508241771315 |
| BAI3     | 38.7537364570873 | 40.6380495994768 | 38.7745734037492 | 39.853175885492  |
|          | 38.2496050953547 | 63.8740412329753 | 34.1889222434768 | 36.43924066428   |
|          | 41.1742244762318 | 54.4825201506931 | 49.3901004211918 | 46.0633179231318 |
| BAIAP2   | 72.4492911262373 | 63.9650465690339 | 67.6373573669424 |                  |
|          | 59.5232818903622 | 73.7525516589171 | 64.2848885182563 | 70.7987307549177 |
|          | 76.9373289454707 | 105.74849082793  | 73.6855877240541 | 77.9287386697519 |
|          | 66.3188075271379 |                  |                  |                  |
| BAIAP2L1 | 359.296873000994 | 255.047622225942 | 522.811631783729 |                  |
|          | 48.665578118898  | 270.036719921343 | 80.5478617156852 | 274.648263378054 |
|          | 250.244199415895 | 570.824732318332 | 266.687281047486 | 222.985386635178 |
|          | 392.796524588309 |                  |                  |                  |
| BAIAP2L2 | 51.1740855632044 | 69.640968387662  | 71.6573554353691 |                  |
|          | 55.2214187655851 | 92.6736029146947 | 55.7197525213035 | 128.966814822678 |
|          | 110.287699369482 | 136.004535901075 | 61.2604442862522 | 63.3544794716167 |
|          | 48.8670821164567 |                  |                  |                  |
| BAIAP3   | 40.148780650831  | 45.1694246393676 | 39.8299340037009 |                  |
|          | 35.7674462337723 | 43.1252272136667 | 35.9305494063137 | 39.7576136507593 |
|          | 38.079222289614  | 46.1101825640108 | 48.8623729374733 | 43.4709415392696 |
|          | 42.8864415494484 |                  |                  |                  |
| BAK1     | 72.0334593545916 | 57.4538469832241 | 69.3468840908665 | 59.8102324370568 |
|          | 62.5106969730855 | 55.540888910486  | 46.7100796279384 | 58.8022152133979 |
|          | 81.552417816742  | 59.2628513357357 | 56.4567728276775 | 54.4313108506244 |
| BAMBI    | 233.435884567494 | 1478.26733379357 | 439.955651727755 | 92.999328769924  |
|          | 994.404707955031 | 349.90835241442  | 1152.55315876935 | 2306.14613042834 |
|          | 1448.17151189672 | 1007.03747721563 | 1201.00042684883 | 1031.4414268329  |
| BANF1    | 663.372296297652 | 552.321665894163 | 613.27814206548  | 422.931891494195 |
|          | 1024.97546870349 | 645.702744916884 | 1014.6400720037  | 637.565156571985 |
|          | 814.294297312057 | 481.905052451245 | 625.435083064752 | 660.295993198711 |
| BANF2    | 41.7397731376692 | 42.2577689927563 | 47.2962360458401 | 41.6564075217517 |
|          | 45.5809132232681 | 47.0940613507321 | 43.8206425661746 | 41.9315419791594 |
|          | 41.1742244762318 | 43.7303813515864 | 44.9713479185144 | 37.6557714476853 |

|        |                  |                  |                  |                  |
|--------|------------------|------------------|------------------|------------------|
| BANK1  | 52.7570461169969 | 63.6966761077037 | 100.205124008648 | 135.669367786875 |
|        | 64.193536444915  | 44.0804700754786 | 63.0119737420787 | 91.9919654450652 |
|        | 103.513421757522 | 68.0556717366572 | 64.6446465846487 | 73.3321469094819 |
| BANP   | 362.506098778318 | 304.718140992378 | 331.306005726359 | 401.202348352506 |
|        | 403.243939813779 | 235.127539195661 | 361.776841675393 | 239.385229462309 |
|        | 287.363928615517 | 272.663785805238 | 316.419421649196 | 267.427827956058 |
| BAP1   | 88.5140510969737 | 85.1950626054282 | 95.7820879892969 | 93.6212502203405 |
|        | 110.411217828763 | 108.022329297132 | 105.802035886293 | 81.3978207813439 |
|        | 94.9831937714438 | 110.909109947659 | 97.1271615802556 | 87.6598268114592 |
| BAPX1  | 48.6621527194963 | 40.716553247236  | 40.301483914446  | 44.9370339275041 |
|        | 44.7829632472754 | 42.2577689927563 | 42.629412460409  | 39.853866204927  |
|        | 56.2441895183416 | 47.7180816682562 | 44.2142581488029 | 38.0452862258803 |
| BARD1  | 162.993316022946 | 97.5849495690144 | 101.935321521672 | 148.333778341005 |
|        | 109.017269529278 | 168.492959515167 | 187.331614826395 | 293.463475974405 |
|        | 143.607457611143 | 157.7623351008   | 204.200566808626 | 121.449647909665 |
| BARHL1 | 36.3649677956953 | 36.89524015739   | 37.2838080935695 |                  |
|        | 43.5627649099623 | 39.859345745831  | 40.5281496800812 | 41.8315602975157 |
|        | 42.157627240486  | 39.6609238036815 | 41.1222709786153 | 41.6336636285875 |
|        | 38.3291713594599 |                  |                  |                  |
| BARHL2 | 36.8072833828297 | 35.4484652445078 | 37.5597671487621 |                  |
|        | 39.5050383901884 | 40.8873907150245 | 42.8598805316863 | 43.4544762830742 |
|        | 41.8417024632349 | 39.7537274655115 | 37.8217989841918 | 47.5439485437351 |
|        | 38.5279745308203 |                  |                  |                  |
| BARX1  | 44.9896851005259 | 38.4330755397458 | 41.1367478979484 | 43.5627649099623 |
|        | 41.8806343997257 | 42.2577689927563 | 36.08956004634   | 40.831207953647  |
|        | 42.9020321355927 | 38.957687788868  | 42.0750889188255 | 40.2669497398702 |
| BARX2  | 46.7293238583888 | 42.7775752471711 | 43.401782064778  | 53.3967242431461 |
|        | 45.2556760873335 | 41.0582900711341 | 55.8019623191927 | 45.0972184964705 |
|        | 50.1603795873336 | 43.1839109702714 | 37.7384958256497 | 42.57175366709   |
| BASP1  | 1017.1803754111  | 1019.67015337432 | 1033.99699402259 | 3818.71752181269 |
|        | 363.002913525646 | 1317.29255644089 | 3329.68037676265 | 3726.73487426505 |
|        | 1134.52018899688 | 562.394906600222 | 804.070613101101 | 663.372296297652 |
| BAT1   | 618.293140877956 | 514.70012608304  | 454.939614583134 | 351.114115662108 |
|        | 425.174170332175 | 394.437597863822 | 572.968592371501 | 468.381233506231 |
|        | 383.853296408061 | 651.078746026341 | 598.970109654466 | 414.062259640915 |
| BAT2   | 382.872356030213 | 230.763782802004 | 210.255784687052 | 198.103081445734 |
|        | 323.295794446334 | 203.729732499418 | 306.115856873599 | 252.870708814507 |
|        | 268.54298415337  | 238.120731107691 | 250.308866488702 | 166.304210248623 |
| BAT2D1 | 411.431488342465 | 332.137622104526 | 396.63268714181  |                  |
|        | 319.248898194029 | 556.092573451208 | 291.713831398096 | 287.39391763763  |
|        | 270.662475158799 | 363.947777340854 | 278.773982275525 | 421.791344753995 |
|        | 382.872356030213 |                  |                  |                  |
| BAT3   | 163.62024333166  | 123.247207157645 | 132.52749757795  | 103.233768723364 |
|        | 115.277469628296 | 112.086648546139 | 158.156217755244 | 108.57858133896  |
|        | 117.869393694564 | 141.266956686625 | 133.673536028938 | 110.860844149372 |
| BAT4   | 45.0985088502363 | 50.2163892855092 | 43.8495248991589 | 62.1776700757427 |
|        | 49.32293280121   | 54.5952754712007 | 55.695361644141  | 44.9977782988116 |
|        | 57.1016072897358 | 56.057906531592  | 42.911855821602  | 42.9887069977696 |
| BAT5   | 357.762505796238 | 307.922754395377 | 217.6996233059   | 266.439343650315 |
|        | 171.722423740869 | 215.955919625615 | 187.086662645246 | 135.829530518199 |
|        | 263.096895937991 | 249.002758392739 | 188.432979046693 | 203.53267380432  |
| BATF   | 146.333318667921 | 131.99898435227  | 236.661422875826 | 310.255767356827 |
|        | 108.607805039005 | 175.271140689255 | 272.257070024902 | 226.168990555083 |
|        | 227.843903680287 | 177.55994726993  | 195.456604920944 | 197.515728627482 |

|       |                  |                  |                  |                  |
|-------|------------------|------------------|------------------|------------------|
| BATF2 | 56.6951078698291 | 55.3477556906605 | 46.4569566520107 | 73.3725472767369 |
|       | 42.9090346219023 | 46.0364000143537 | 40.2154497375715 | 47.9942520395434 |
|       | 44.4395580493118 | 63.3872214856708 | 61.4121672148248 | 48.9733758107788 |
| BATF3 | 63.3717459766798 | 59.5534127075228 | 67.0421310720934 | 144.813029178278 |
|       | 59.4830424460714 | 128.873145026756 | 55.2088411137193 | 47.7889447429963 |
|       | 41.7627910693483 | 42.5664883002833 | 48.8744644207821 | 59.7999569757275 |
| BAX   | 176.75369241505  | 200.384444538476 | 261.421333472097 | 167.920131968611 |
|       | 307.133157118667 | 107.808744445896 | 216.303036873073 | 128.732177437756 |
|       | 186.229678647062 | 96.1596075221747 | 115.155021677978 | 126.404988409795 |
| BAZ1A | 92.0136417064806 | 186.504623165619 | 161.65846687852  | 322.109212713082 |
|       | 109.14984236229  | 116.51037006692  | 160.499410146402 | 154.959129917681 |
|       | 194.278792348966 | 114.617965877564 | 119.872031126474 | 144.757886965525 |
| BAZ1B | 137.785462971848 | 106.691530592115 | 112.727277807495 | 138.189579100482 |
|       | 132.997204273031 | 156.822939275312 | 134.024691118762 | 137.302487233881 |
|       | 181.950503247343 | 165.121380058529 | 162.23769718358  | 112.113501370522 |
| BAZ2A | 44.5282181324797 | 43.2649781354792 | 41.3366779545815 | 42.0102671859606 |
|       | 46.4343327861696 | 40.650742261428  | 43.0930293831497 | 44.0390019242862 |
|       | 41.9635525160083 | 42.1622837416589 | 43.4709415392696 | 40.0557788909923 |
| BAZ2B | 188.156490868789 | 144.098339910117 | 188.979306100283 | 213.590067519021 |
|       | 130.758455807465 | 192.666532389331 | 147.010700944686 | 223.749512763927 |
|       | 112.131738588405 | 413.31638457585  | 336.159430045964 | 257.325282051981 |
| BBC3  | 40.9558083259517 | 42.5269793679335 | 39.9101908547397 | 36.5393857306744 |
|       | 38.745552403895  | 36.3845892764084 | 35.9894133432376 | 32.6039814489621 |
|       | 41.863927676552  | 45.7911932481722 | 39.3667161654772 | 42.7782216342806 |
| BBOX1 | 42.9104454767916 | 40.6380495994768 | 42.7303139017786 | 37.29566077996   |
|       | 46.3150221024046 | 37.8102105794655 | 36.9355798143571 | 45.7476095696859 |
|       | 62.0272989884264 | 41.8613406887824 | 37.5583886316038 | 34.5633623842083 |
| BBS1  | 103.945335792682 | 114.526825145076 | 122.748811531184 | 91.9185612536409 |
|       | 152.942332679485 | 215.109108265052 | 136.751431410199 | 122.482560090133 |
|       | 114.755820699611 | 208.3497732496   | 208.915145509698 | 182.188883821722 |
| BBS10 | 37.8386378737561 | 38.5252456306656 | 40.5734458834617 | 33.0463640202858 |
|       | 34.0045980663271 | 51.0506441018166 | 30.8360322325222 | 36.5393857306744 |
|       | 48.2123120250343 | 38.1042454705119 | 42.911855821602  | 45.2783024981315 |
| BBS12 | 60.7371790125714 | 58.6249721386149 | 55.8810837854139 | 53.593974682612  |
|       | 55.6991707857987 | 56.1671440556142 | 51.4349390827895 | 51.3472428383325 |
|       | 58.2401724760744 | 60.1466326805616 | 55.9604109457703 | 53.840976437122  |
| BBS2  | 164.487183006292 | 192.356440003154 | 303.189681281366 | 131.57403028894  |
|       | 190.422737436225 | 218.675464231277 | 130.506891299903 | 129.525395445221 |
|       | 157.109085253328 | 228.21982974423  | 251.905799624693 | 166.208731611481 |
| BBS4  | 106.356074933606 | 89.5887648181505 | 96.0654949568324 | 98.3948200992292 |
|       | 77.1287755867582 | 128.559660070271 | 98.2843999216669 | 123.506372870621 |
|       | 101.81885073944  | 139.543015878846 | 119.993761317523 | 131.645714321903 |
| BBS5  | 43.0394685862018 | 43.0751697224728 | 43.3085358214154 | 40.9157352260901 |
|       | 44.8248621498677 | 38.2898960213646 | 42.7431359850339 | 39.1236645052911 |
|       | 41.6285300488826 | 39.9576138799997 | 43.0016969050339 | 43.6285248402465 |
| BBS7  | 44.0527419856743 | 49.7235523248653 | 49.0701538857974 | 48.3996768970487 |
|       | 58.7157078555305 | 60.3351200884626 | 50.420938814754  | 46.4379857641858 |
|       | 48.0428788647292 | 56.9463858443402 | 51.3103617600342 | 55.6904617926772 |
| BBS9  | 57.5685357492202 | 47.5647821785529 | 57.8111054584154 | 57.165971310746  |
|       | 47.6153629331146 | 66.0411740221276 | 44.8643898647322 | 54.9919060580109 |
|       | 60.2886873195135 | 73.4447529556358 | 66.4568741702152 | 63.3974067065125 |
| BBX   | 155.174579191838 | 262.865950409375 | 257.851199206959 | 217.293240552946 |
|       | 173.035987237848 | 306.578554914328 | 234.615033303459 | 166.734730009916 |
|       | 161.890859629246 | 243.640796499438 | 376.931257615162 | 292.247095517604 |

|         |                  |                  |                  |                  |
|---------|------------------|------------------|------------------|------------------|
| BCAM    | 55.6781016051988 | 54.113533179847  | 68.4229528414965 | 44.7520317855773 |
|         | 53.3683962805281 | 42.2857372794461 | 48.2439143986124 | 48.7213586071409 |
|         | 54.0536858212253 | 57.0581769379589 | 50.4022543872993 | 46.9919960628953 |
| BCAN    | 42.5506742787391 | 44.1634313979547 | 45.0017158586743 | 50.6141827957642 |
|         | 44.2607789091176 | 43.8378717575959 | 45.8381398279472 | 43.0390857698452 |
|         | 43.3165374444543 | 44.1956990708089 | 43.6875139416756 | 46.581796165231  |
| BCAP29  | 68.1506072825075 | 67.156827317798  | 78.3740506001325 |                  |
|         | 64.9959712888709 | 70.1238785863433 | 77.2048580540589 | 65.7873990226533 |
|         | 63.7491070301764 | 86.4114854104675 | 58.7389869173495 | 60.7103211409901 |
|         | 79.8878785326568 |                  |                  |                  |
| BCAP31  | 1448.17151189672 | 1545.76489731307 | 1379.51119430451 |                  |
|         | 888.56944380788  | 2191.09005731751 | 824.946988188872 | 1621.89443989657 |
|         | 1839.09068171097 | 2071.90741263566 | 1969.8871504719  | 2232.61002288121 |
|         | 1642.75555340648 |                  |                  |                  |
| BCAR1   | 315.799449362526 | 152.66454549157  | 177.958475301951 | 87.9098670472958 |
|         | 147.043419185015 | 106.590506599473 | 131.645714321903 | 175.099998331811 |
|         | 183.690616959682 | 115.235144612428 | 118.251739134889 | 110.626479311082 |
| BCAR3   | 181.738902391483 | 159.747484721905 | 365.620745180605 | 97.4967204298499 |
|         | 203.82788889213  | 155.693953208351 | 203.127486721124 | 121.270627995568 |
|         | 272.828896268482 | 183.165559564289 | 205.510539955583 | 317.560970617018 |
| BCAS1   | 68.9258122619781 | 661.494376716475 | 624.954583057431 | 51.223859150798  |
|         | 89.4111455826308 | 67.1067574196203 | 70.4794854241035 | 133.38594323309  |
|         | 107.610858427836 | 151.030500297499 | 145.741469970609 | 184.808179948172 |
| BCAS2   | 46.1673159982664 | 40.7952353240579 | 46.3150221024046 | 39.7840818430159 |
|         | 40.2449343247539 | 43.7078399718247 | 44.2166118829877 | 42.0494116081998 |
|         | 41.7233690251839 | 38.0078357808393 | 42.170702295259  | 41.7072675309997 |
| BCAS3   | 47.6397712007919 | 52.1967540852276 | 50.6987358483181 | 37.1894304543751 |
|         | 52.0583273941813 | 48.4758590019384 | 42.8684958525042 | 42.8482181313226 |
|         | 64.830448408529  | 60.2877434874622 | 52.8489752025797 | 46.1592873342534 |
| BCAS4   | 219.737294408079 | 75.0873720488265 | 159.618353114269 | 70.3871361660046 |
|         | 93.4093169676983 | 95.0026207727863 | 172.381808887528 | 266.07996221256  |
|         | 116.663501139305 | 208.097209050425 | 156.401873737061 | 136.766779297051 |
| BCAT1   | 111.397578350396 | 39.6123051184545 | 48.0191002461099 | 196.513433958685 |
|         | 85.0017995689256 | 134.922819713509 | 81.0331497830643 | 51.9447450229707 |
|         | 74.6955454743937 | 47.7180816682562 | 54.113533179847  | 64.1607001437806 |
| BCAT2   | 107.836867810972 | 674.270050283701 | 559.559234461244 | 139.101561420631 |
|         | 975.544591158047 | 329.282615395786 | 1171.207937488   | 579.482255191456 |
|         | 1243.32650314893 | 826.024359447649 | 667.583623414832 | 684.238999553691 |
| BCCIP   | 128.542999559673 | 136.843285454801 | 167.430013807712 | 142.251426773121 |
|         | 259.626847216881 | 186.265538054701 | 172.506486240017 | 150.925721934159 |
|         | 146.432425205891 | 91.1057573288203 | 111.397578350396 | 161.283979969295 |
| BCDIN3D | 119.993761317523 | 116.882934971483 | 112.469702446962 |                  |
|         | 122.024487499513 | 104.914715637173 | 113.377818029985 | 163.458716079887 |
|         | 191.523447800488 | 197.540681021755 | 139.645717741863 | 161.228738711412 |
|         | 112.944044862693 |                  |                  |                  |
| BCHE    | 46.0398513158469 | 43.1805016690297 | 42.281606728072  | 49.9672547361866 |
|         | 38.3085139808968 | 112.659254685552 | 39.4600924554505 | 43.9366081640576 |
|         | 92.8951148347802 | 69.6511571901941 | 55.0031529299037 | 48.3648494350286 |
| BCKDHA  | 328.341232263338 | 263.937966521917 | 337.156068385541 |                  |
|         | 276.86542239106  | 415.05124917015  | 239.590143292142 | 445.307046237791 |
|         | 427.199940706169 | 567.393665550133 | 457.860665614779 | 401.403103922907 |
|         | 320.74875942191  |                  |                  |                  |
| BCKDHB  | 55.7246872330059 | 112.421316052392 | 92.563449632567  |                  |
|         | 44.6246431218094 | 76.4588249117885 | 73.438931050354  | 77.4812665677338 |

65.9143782252686 73.7873098190297 87.0187282933132 91.31756001203  
84.5998418020787  
BCKDK 666.816487335088 440.728435508514 838.974043046676 848.079114196986  
1143.51046585232 538.290200196057 644.368005872231 1249.41227924272  
389.131545459708 529.430648638878 459.182372959714 450.271658272512  
BCL10 52.109723558511 61.8824218975538 56.2441895183416 61.3747706295648  
50.7116312517035 55.0009147092272 52.8496345990125 50.563951934942  
44.476519804187 42.3606390470387 47.8676131893619 55.8775622338124  
BCL11A 42.5534565507139 63.5693267269002 44.5658219748173  
106.276392548097 45.9811664221893 66.7475567712242 87.3213916666808  
84.6811991332281 79.0918252621521 156.311985997533 79.9567256807679  
84.1401040507557  
BCL11B 43.9309845324767 88.6905706130505 105.376705821141  
74.7047606031323 63.0383605052305 46.8319561350724 61.8571521441451  
56.9299697426319 101.549779766678 70.0907269565408 57.0514418438652  
53.5292049088661  
BCL2 55.7979038616211 54.1437245703767 47.3435572390933 90.8188865732032  
44.3292391134969 61.9787117490846 50.2428460389837 50.3972033014227  
56.8436081694537 114.5696064637 89.680151549258 72.2211523775459  
BCL2A1 38.304249186058 39.8695929627783 41.3366779545815  
92.8026641003757 38.3561682218911 47.5733603903505 41.3594868055879  
40.047314525032 44.0519245668737 41.7405682794166 38.8507804383261  
45.2783024981315  
BCL2L1 886.397061577531 592.010988342149 481.492404948275  
590.139974503603 583.915973546284 383.853296408061 779.996851709716  
444.858305070415 522.377154567257 486.757854744053 601.611039798626  
391.292537565032  
BCL2L10 38.7537364570873 40.2493681589104 48.0191002461099  
40.4359177791566 59.4830424460714 46.3715909653832 40.3302268293707  
43.0390857698452 60.0736861987141 49.0841460667818 50.7903824729818  
52.4992300612807  
BCL2L11 44.8446015771755 46.1204054852871 48.2274642570366  
56.0794100106654 49.8966674037224 39.8873706855774 47.8179475230844  
43.4812166409346 48.0563448184655 40.0514069727124 43.1931731665131  
42.3214282169749  
BCL2L12 113.218291314173 139.758805241617 121.782045054657  
91.9185612536409 454.185408362583 125.091427687365 232.048938339214  
183.393353108744 220.217797955745 89.8957070711076 81.2992152187529  
82.0124493733776  
BCL2L13 488.183286350725 578.456468865003 640.0926391761  
438.681666410245 434.223722811041 666.816487335088 371.513106715598  
392.622487173359 534.755211286733 803.548811322583 768.888528247493  
634.226367147025  
BCL2L14 41.8409927585705 41.3366779545815 38.2502942836481  
38.1421709520616 40.7376840028647 39.4551617322991 39.2010256871265  
41.3945375181463 39.1400590089945 42.9358255168086 40.9157352260901  
40.6308525754377  
BCL2L15 75.8122107270212 41.5132248356707 37.0642268327439  
41.6564075217517 41.8806343997257 37.842873463785 56.1463616087682  
43.0930293831497 35.8265993915844 37.7598032934773 36.9768361759916  
40.2669497398702  
BCL2L2 213.933347509147 152.880772824839 112.328675926999  
104.158950889938 126.088821850066 402.978328664331 86.6798536307388



|        |                  |                  |                  |                  |
|--------|------------------|------------------|------------------|------------------|
|        | 112.40706320177  | 79.6198202883864 | 233.96534264787  | 205.051252996628 |
|        | 364.439669236186 |                  |                  |                  |
| BCL3   | 335.943994595615 | 208.097209050425 | 197.103673938152 | 416.844848063269 |
|        | 270.89711217076  | 422.702925141293 | 316.548339196872 | 506.173054520807 |
|        | 497.591040004541 | 108.905276555106 | 128.300809076274 | 239.792011765323 |
| BCL6   | 267.232315058148 | 305.786520619504 | 299.334388262225 | 731.670315613547 |
|        | 385.36587480414  | 633.819901764391 | 347.552309199761 | 173.694418385132 |
|        | 530.710127703061 | 400.416888798951 | 405.852280880924 | 535.313561995599 |
| BCL6B  | 48.8941062980393 | 46.4385386401326 | 44.8872784170036 | 42.0102671859606 |
|        | 44.2607789091176 | 42.5660695551615 | 33.1392460259336 | 49.2019743609873 |
|        | 39.4762546236449 | 40.2112371512838 | 45.1432412071268 | 44.2527566343661 |
| BCL7A  | 39.2958230580497 | 40.8503192605024 | 40.7620472083159 | 39.7742005651286 |
|        | 44.7114813656401 | 44.0328992213727 | 38.0598374201407 | 39.3086414047188 |
|        | 42.6861857638473 | 41.9666541498638 | 39.9899430628542 | 43.8291226513066 |
| BCL7B  | 83.5646728968172 | 116.51037006692  | 126.420070148631 | 121.281573820819 |
|        | 133.074560812703 | 182.601427407211 | 101.065203693106 | 82.7269382676336 |
|        | 162.658589763207 | 113.008760911729 | 112.007118067348 | 127.2070318269   |
| BCL7C  | 195.740109330843 | 179.897685693038 | 185.378190201718 | 146.931674964658 |
|        | 215.399634344016 | 298.771150048863 | 157.677866955988 | 219.64979849407  |
|        | 143.607457611143 | 135.436347750159 | 149.45630414346  | 115.001179779307 |
| BCL8   | 42.9104454767916 | 39.6995529770239 | 38.3166554965434 | 39.2780515621926 |
|        | 37.8679241954337 | 36.2015763253919 | 43.1931731665131 | 39.7509165247419 |
|        | 38.5252456306656 | 45.0155543555707 | 39.6403089864678 | 40.0557788909923 |
| BCL9   | 304.658728492827 | 116.094881058504 | 138.362914843774 | 62.0404348860702 |
|        | 154.355197155161 | 100.650129064849 | 142.465925522042 | 129.179537795204 |
|        | 155.541828028535 | 118.726647822102 | 103.199200862158 | 92.4350913779886 |
| BCL9L  | 92.1908585323292 | 70.1238785863433 | 70.9377012403023 | 48.9944486068347 |
|        | 66.5187917407182 | 63.2343637481705 | 78.3082773071531 | 78.6911549149983 |
|        | 64.9030399249327 | 72.2443746456494 | 72.6162848018047 | 47.2131144508464 |
| BCLAF1 | 213.590067519021 | 240.520228413182 | 190.548265163011 |                  |
|        | 185.165420581989 | 194.435776102991 | 241.736113354506 | 236.374695859748 |
|        | 185.924923239764 | 199.264520680174 | 265.320447667174 | 270.600852806342 |
|        | 244.837105178705 |                  |                  |                  |
| BCMO1  | 61.8529316708431 | 43.5873188565519 | 43.0016969050339 | 38.745552403895  |
|        | 37.6527901109005 | 39.4953494583071 | 82.6381941930783 | 56.1404433602127 |
|        | 48.7358147030082 | 46.441301934328  | 44.9713479185144 | 36.8690774823319 |
| BCO2   | 37.55264801907   | 43.3458769998118 | 45.3974838013476 | 39.6292788039793 |
|        | 39.0564222526273 | 41.9543948167375 | 37.830876898596  | 43.2551508830106 |
|        | 36.197424053556  | 40.7063426028871 | 38.4689132737495 | 38.5279745308203 |
| BCOR   | 67.3136079922956 | 99.1565755621214 | 94.6432868887401 | 56.3525213736952 |
|        | 63.785471218558  | 68.5174271063894 | 79.856662992182  | 103.447730395424 |
|        | 112.048972076936 | 96.5102825310977 | 87.1651984640976 | 80.2070411865083 |
| BCORL1 | 51.413025495745  | 56.8373628733077 | 50.7502704822135 |                  |
|        | 51.7739270955254 | 60.7495043977707 | 62.6839349907803 | 73.8313212063649 |
|        | 46.3685439301234 | 49.7336769474446 | 60.7495043977707 | 59.9682734755814 |
|        | 54.7953298048942 |                  |                  |                  |
| BCORL2 | 45.3872406432794 | 44.5152708955623 | 39.991353369336  |                  |
|        | 41.8778873678551 | 43.6587492470348 | 40.8634043028528 | 40.7910160811527 |
|        | 41.3506832276112 | 39.7537274655115 | 43.2988017098387 | 43.401782064778  |
|        | 41.9430737035925 |                  |                  |                  |
| BCR    | 54.4384603094793 | 57.3562426592112 | 54.4825201506931 | 47.4119039314844 |
|        | 49.5172323138783 | 45.9989204975182 | 50.7568454312473 | 52.1788489555942 |
|        | 53.8052648457439 | 47.9056710878325 | 52.4665168142681 | 48.8165026569686 |

|        |                  |                  |                  |                  |
|--------|------------------|------------------|------------------|------------------|
| BCS1L  | 116.311176407088 | 106.951862149262 | 168.883366756191 | 81.0057400164851 |
|        | 220.426780242132 | 113.612874206329 | 97.712117589297  | 103.513421757522 |
|        | 121.36340610316  | 120.381190859636 | 113.791456064084 | 125.92333271598  |
| BCYRN1 | 413.918050849658 | 192.98559983091  | 183.584085676174 |                  |
|        | 265.520773157991 | 144.290966198687 | 279.175841990291 | 212.822978676596 |
|        | 877.673009984357 | 139.328628553223 | 477.558242266308 | 608.579654909865 |
|        | 426.015657750123 |                  |                  |                  |
| BDH1   | 41.181169807632  | 60.8857255846432 | 48.2274642570366 | 39.2780515621926 |
|        | 69.3468840908665 | 44.5085634580805 | 63.1137861754989 | 38.7023886970298 |
|        | 47.6667014835128 | 56.2508140932179 | 44.1148826235374 | 46.1592873342534 |
| BDH2   | 38.8561375693335 | 39.1982470626863 | 48.7039705048129 | 35.8472302065546 |
|        | 46.0043807840705 | 46.3715909653832 | 39.5496902678788 | 38.1835938174625 |
|        | 44.0519245668737 | 40.8049408996274 | 41.5421429082231 | 39.5418280570561 |
| BDKRB1 | 88.0186381834147 | 51.524711857679  | 54.6820069269589 |                  |
|        | 59.987045425047  | 65.8319449883221 | 152.86270446968  | 47.8947595316832 |
|        | 73.2037966614621 | 43.9450023643394 | 59.5785089386245 | 67.3976855661302 |
|        | 57.445796273665  |                  |                  |                  |
| BDKRB2 | 44.2350046179299 | 42.3550738181144 | 39.9101908547397 |                  |
|        | 55.6481366056639 | 44.5668141895992 | 52.1024135605001 | 44.4639405506967 |
|        | 64.964255000378  | 43.2761454096265 | 49.4006068471301 | 58.8961770381033 |
|        | 53.5643281930979 |                  |                  |                  |
| BDNF   | 40.4239925664876 | 43.5182502375207 | 39.9538181787289 | 39.5766049255681 |
|        | 44.4122940018742 | 39.3467744082997 | 40.4999319300923 | 42.2869243641471 |
|        | 39.439415116651  | 44.2580151149956 | 42.5932477401361 | 72.2544131004774 |
| BDP1   | 45.2875173643252 | 49.83247261979   | 48.6037684272115 | 43.6726153508978 |
|        | 37.956732373465  | 41.6590564937735 | 47.4439407315335 | 44.6107027295193 |
|        | 41.6616444147804 | 42.785429206422  | 56.1379957867124 | 49.3984571719129 |
| BEAN   | 57.2960245538881 | 42.7775752471711 | 46.1312573416873 | 48.4916117779992 |
|        | 41.467005949568  | 43.7078399718247 | 45.6706505553383 | 53.1613811648611 |
|        | 42.6762317063737 | 41.5435611403119 | 41.2598458726002 | 39.7411455670172 |
| BECN1  | 117.074650076861 | 203.373397813051 | 198.010793115588 | 153.153205095999 |
|        | 144.799432299339 | 159.835690229505 | 126.253578620746 | 120.142759111608 |
|        | 178.379117285008 | 91.5417574979683 | 109.386655134289 | 141.784776736918 |
| BEGAIN | 58.0139597055449 | 47.087835967892  | 45.6989664108554 |                  |
|        | 52.5307002738469 | 54.0126916508417 | 49.641159251878  | 59.6780848951767 |
|        | 52.407151732257  | 46.6944238390932 | 61.7502624458447 | 49.3901004211918 |
|        | 50.3118072462443 |                  |                  |                  |
| BEST1  | 43.4626049853157 | 42.0709558258414 | 51.3268475761593 | 157.677866955988 |
|        | 47.0954207417646 | 59.7009992986607 | 41.5817737564592 | 42.0494116081998 |
|        | 41.4636047919453 | 41.7405682794166 | 48.8744644207821 | 49.5539622682049 |
| BEST2  | 32.406093465115  | 40.9731067463382 | 37.9482157381008 | 43.6726153508978 |
|        | 31.3142073726046 | 42.6575535390785 | 43.4544762830742 | 34.6977013306396 |
|        | 36.8127605061228 | 39.9948390976317 | 36.7283081422707 | 35.9604262434141 |
| BEST3  | 35.2267149016596 | 40.5400384479766 | 40.5734458834617 | 43.5627649099623 |
|        | 37.8679241954337 | 37.9951997351435 | 49.6872467499977 | 40.831207953647  |
|        | 42.1594905198929 | 37.8217989841918 | 37.9230440150891 | 40.5703581862752 |
| BEST4  | 44.1294459089314 | 48.7084357480922 | 47.0940613507321 | 42.357910063876  |
|        | 41.8806343997257 | 41.159706131351  | 53.7423898357583 | 42.7431359850339 |
|        | 41.4636047919453 | 47.8207974930031 | 42.911855821602  | 41.4508241771315 |
| BET1   | 100.403196213407 | 84.5572894783679 | 86.6910280940418 | 95.7571966348067 |
|        | 104.072423445726 | 100.151116279734 | 83.5149142053137 | 71.8314470868658 |
|        | 125.676172266736 | 72.1090339831747 | 114.918205718649 | 122.084249177093 |

BET1L 54.0990839134272 56.5319193881205 54.9944485073259 50.7046706880325  
51.940083408061 57.6034762511847 35.6056062164318 40.4359177791566  
48.4869909888679 74.5694657001572 64.2174369755376 56.6888826857797  
BEX1 66.7299966077909 58.3475983630509 109.029196594263 61.8293674397954  
78.5141640924736 154.891160328731 81.5582217750731 57.824185116862  
78.3962885374388 58.5087296620514 64.7023558190673 72.1090339831747  
BEX2 130.848965290163 109.525921548011 289.533968432846 124.976348531594  
225.589127792587 180.63535336811 483.20917825594 558.451033789799  
428.729935028911 209.068725760522 146.087016079575 161.04166688561  
BEX4 163.946447772618 148.544012961815 296.598410253206 169.144145421022  
172.039289618908 313.046160403661 221.049503614433 162.658589763207  
353.810269076023 175.28322146764 172.676819138152 346.285308869994  
BEX5 38.2083710281545 43.4396866157171 44.696023817801 42.6913548400127  
39.6535880152834 61.1022920882065 43.6753843488695 62.2982003555312  
56.2441895183416 43.844855336215 47.2134341420411 52.3896785600751  
BEXL1 212.152751915521 156.061711961514 393.648308810931 198.729330487352  
197.895987726243 325.769076169162 276.86542239106 235.613437037284  
331.762920362224 288.687391623935 264.88963894526 400.327164003217  
BFAR 95.4841914842335 154.612425659555 167.746168796779 131.955454394903  
134.981483569602 149.352994264999 143.152895211088 135.11808699414  
103.139459009593 112.17141283151 127.811684080184 161.156612172544  
BFSP1 49.8472708021525 38.5252456306656 47.9035532886869 35.49696651597  
41.7929491793697 46.3715909653832 43.6753843488695 54.9919060580109  
39.1790517315259 52.8928296360463 42.170702295259 40.9683275553869  
BFSP2 39.0620487644635 38.8336427948187 38.2280071951674 39.2780515621926  
36.7356360093603 45.1873487463472 41.0381860307445 43.7396619462033  
37.6383530120621 44.0409178714232 42.8263096141654 44.7401523707775  
BGLAP 62.9952378379206 59.0709442090059 73.2814174739782 49.5424425850549  
106.804269453898 70.380703483689 60.5125774827425 52.5098795466615  
69.0037087543684 58.3813211109331 63.0043412964216 58.2251348002272  
BGN 9709.60940482862 2697.96877833185 3465.3013599062 4015.88651424568  
2113.73880184695 1043.26325848938 343.418685340038 2384.00264993279  
268.936151471133 1058.61208471961 991.630429625437 766.027617496754  
BHLHB2 2903.00880209344 1333.01876209753 2318.50555842521  
2697.96877833185 706.087945508248 1497.73669971925 1106.57048989685  
1829.30985071028 1731.19220270448 2337.7738990994 2133.78836857697  
4550.56817942699  
BHLHB3 65.0721641331632 139.758805241617 169.557757933574  
101.708164294697 58.8961770381033 60.1042270393382 66.0350709576651  
102.818879165949 272.663785805238 175.136856246782 118.720812623965  
167.920131968611  
BHLHB4 33.0463640202858 35.4484652445078 44.4311655729487  
40.646702696033 39.1650142708257 40.7616966228404 43.1931731665131  
34.3865306339645 42.2577689927563 39.0648733099061 44.4688999098904  
39.4490233720848  
BHLHB5 80.9663216993544 57.2871072823547 47.9035532886869  
130.673639258681 45.1137938810047 110.540953771795 39.3585350448719  
43.0390857698452 44.1519466943185 51.6778366958973 61.1801493883012  
43.0930293831497  
BHLHB8 43.1805016690297 41.159706131351 38.8775560911841  
41.5464765641928 42.4864576619427 49.9699131196797 35.9894133432376  
46.2779564481158 40.6957787921451 41.2276963324981 45.7328341667151  
47.6040671292013

|        |                  |                  |                  |                  |
|--------|------------------|------------------|------------------|------------------|
| BHLHB9 | 54.3554233228353 | 60.9311907846259 | 54.0536858212253 |                  |
|        | 57.0629653735694 | 65.6824363141962 | 75.353039684456  | 85.6236091398006 |
|        | 67.6082563445866 | 65.9254098858352 | 109.045804556923 | 92.3901719424121 |
|        | 99.7529382840954 |                  |                  |                  |
| BHMT   | 33.9561816279577 | 1939.66920192372 | 56.607199625498  | 38.9534635879195 |
|        | 480.386431986343 | 87.2437977005922 | 2306.14613042834 | 144.898757916905 |
|        | 225.50098418159  | 507.375704144286 | 433.447319956981 | 154.793640473854 |
| BHMT2  | 42.1537476443423 | 42.9358255168086 | 36.5201388311834 | 46.1074305700679 |
|        | 40.3021896270845 | 78.812106589086  | 38.0598374201407 | 46.7508829977587 |
|        | 35.7973685350741 | 63.0748373122119 | 61.940656536312  | 63.4427357028556 |
| BICC1  | 40.148780650831  | 35.8227939208521 | 43.8495248991589 | 38.6414316877471 |
|        | 36.9702228618069 | 38.8336427948187 | 41.706879587091  | 41.6466169548846 |
|        | 37.1820543575123 | 42.9866214102525 | 37.0180934800573 | 38.745552403895  |
| BICD1  | 47.1962846565261 | 44.6918600441328 | 48.8941062980393 | 44.4912617551615 |
|        | 47.3791873993182 | 43.8308097066396 | 44.5390641547628 | 48.7039705048129 |
|        | 45.1899271235974 | 45.0864985243943 | 45.5955029316007 | 46.1592873342534 |
| BICD2  | 107.951009163316 | 173.11353027932  | 128.436305192918 | 163.20801480093  |
|        | 163.43197105141  | 121.441763452598 | 123.739272396278 | 138.027432399991 |
|        | 105.247736284747 | 150.114520857436 | 174.392758289374 | 139.218017862207 |
| BID    | 65.7002710293248 | 99.6392844274488 | 73.2144205844199 | 137.335224748204 |
|        | 97.7153995525346 | 72.4094549259929 | 104.932630862885 | 92.4251917286941 |
|        | 90.7037473522607 | 56.8201201798712 | 57.0427273538849 | 62.0967404944031 |
| BIK    | 72.3388488936832 | 53.0383634135393 | 76.889690218685  | 41.1886975241176 |
|        | 45.2556760873335 | 34.9849896310235 | 102.150058925164 | 86.2118355769367 |
|        | 102.457537266105 | 47.1001757441025 | 48.1352470945488 | 43.2776458914333 |
| BIN1   | 373.330920144642 | 128.885933852704 | 123.908152883436 | 320.684862879691 |
|        | 91.4121563150184 | 1161.71671016964 | 114.611557317665 | 197.325473090277 |
|        | 126.753713093485 | 572.968592371501 | 826.490051619826 | 346.438778257772 |
| BIN2   | 39.9697332660833 | 35.6434124419782 | 40.5734458834617 | 38.5252456306656 |
|        | 42.9090346219023 | 40.1428591998404 | 39.5496902678788 | 40.931294690669  |
|        | 39.2809305246091 | 37.2089297656361 | 40.8225507267584 | 44.5432192783161 |
| BIN3   | 96.3232257371077 | 51.524711857679  | 51.8122261766744 | 50.8567345921473 |
|        | 49.0828761839116 | 48.3686935595826 | 63.928488869459  | 45.1714698794331 |
|        | 49.3780606970538 | 71.9124897002253 | 74.466989900636  | 66.8026147385682 |
| BIRC1  | 42.3433931248155 | 41.2598458726002 | 43.0971787292711 | 41.4273122914951 |
|        | 38.6454098044474 | 38.4330755397458 | 34.2773859804062 | 32.8834169462007 |
|        | 41.9635525160083 | 42.5664883002833 | 37.1059647239814 | 29.633229264005  |
| BIRC2  | 213.140641182603 | 191.394143505573 | 162.708058265337 | 269.438510636306 |
|        | 172.676819138152 | 163.20801480093  | 259.481036467571 | 201.800572658224 |
|        | 190.921576470336 | 299.240215762404 | 225.760096749053 | 240.696431900526 |
| BIRC3  | 256.116479208201 | 185.360921731157 | 230.554867472663 | 527.037018015766 |
|        | 141.266956686625 | 255.946758662074 | 244.529657015078 | 462.762837284748 |
|        | 151.815294281745 | 318.527516338791 | 294.372319595103 | 279.632025097952 |
| BIRC5  | 130.455608913636 | 86.5926014007562 | 76.2533853403813 | 52.5307002738469 |
|        | 155.378768637562 | 54.7083331985678 | 194.951677338012 | 139.177720567217 |
|        | 219.676249419297 | 46.9598474201212 | 41.2267153672559 | 40.5703581862752 |
| BIRC6  | 74.7955767483841 | 60.0601788842942 | 71.5484567134601 | 51.3851157261451 |
|        | 65.3019328668633 | 72.9154861179393 | 69.3468840908665 | 89.9227845135785 |
|        | 67.9176876913772 | 91.2016867646161 | 71.5249259772583 | 77.3260618801358 |
| BIRC7  | 47.7779356299965 | 41.1212129940704 | 39.8299340037009 | 67.1209520838357 |
|        | 43.004943518025  | 43.9366081640576 | 41.8315602975157 | 39.0170123539232 |
|        | 39.6609238036815 | 37.9661004970253 | 38.2795150354677 | 38.0089018744739 |

|         |                  |                  |                  |                  |
|---------|------------------|------------------|------------------|------------------|
| BIRC8   | 44.5282181324797 | 43.2649781354792 | 35.9305494063137 | 40.3180310664156 |
|         | 46.0043807840705 | 39.6251842352088 | 42.7431359850339 | 40.5158867964016 |
|         | 40.0403898620771 | 41.8613406887824 | 41.6336636285875 | 38.5279745308203 |
| BIVM    | 145.459578481501 | 138.568626520133 | 132.679840262941 | 95.2218627805387 |
|         | 141.410183156424 | 149.173801572239 | 119.124583755587 | 97.9497090233081 |
|         | 121.270627995568 | 156.08027400493  | 148.608392563633 | 150.011814577972 |
| BLCAP   | 375.529704925121 | 244.089971761037 | 389.481124074714 | 143.624756920887 |
|         | 286.996922972683 | 151.709689636448 | 232.320396482547 | 248.527031538874 |
|         | 558.451033789799 | 1109.17675353971 | 797.019657306322 | 626.749986744506 |
| BLID    | 43.3638918705225 | 38.6414316877471 | 41.2365089689635 | 36.890925044696  |
|         | 41.467005949568  | 40.040778349137  | 44.4639405506967 | 41.0381860307445 |
|         | 44.1519466943185 | 41.3321861371202 | 38.5668610487033 | 42.1537476443423 |
| BLK     | 42.442231667357  | 55.8678615468603 | 52.3432130135266 | 134.952392466784 |
|         | 37.7576900881741 | 38.9378717994178 | 47.1345949868029 | 55.1109784383525 |
|         | 45.4799270968969 | 38.4187686307607 | 39.9070785037411 | 38.6454098044474 |
| BLM     | 86.3054012048636 | 64.4837166864084 | 56.939860285007  | 85.7983996395757 |
|         | 110.411217828763 | 49.4157684139858 | 129.143252341926 | 130.960165577212 |
|         | 75.891637602914  | 50.8826620053386 | 44.1148826235374 | 40.9683275553869 |
| BLMH    | 80.3730667493235 | 78.7282247242035 | 80.531334073336  | 60.1837189855762 |
|         | 75.8306078651291 | 73.5743059777365 | 88.5907320965949 | 78.1448136847078 |
|         | 132.369828264246 | 107.015362116555 | 87.8967913380047 | 96.5813769696577 |
| BLNK    | 35.1307934330047 | 40.4359177791566 | 36.2683886571585 | 37.651298468202  |
|         | 41.6806984441849 | 39.2985791324641 | 39.3585350448719 | 41.0381860307445 |
|         | 35.9645119596869 | 36.4651112441576 | 37.2018803984555 | 36.3454320848591 |
| BLOC1S1 | 159.485978728    | 182.411383422586 | 230.117814622646 |                  |
|         | 301.79813401066  | 108.607805039005 | 310.763904671301 | 220.03226547675  |
|         | 269.546586017659 | 283.036694859397 | 250.308866488702 | 233.263058459431 |
|         | 284.942182200489 |                  |                  |                  |
| BLOC1S2 | 46.1513019317765 | 47.0981389355244 | 44.5544727111028 |                  |
|         | 44.6905691366696 | 44.0977148249302 | 54.7083331985678 | 42.22763273471   |
|         | 44.0390019242862 | 42.992884918158  | 47.1785588364488 | 44.3440839686558 |
|         | 48.8266530503117 |                  |                  |                  |
| BLOC1S3 | 44.6231541342    | 43.1805016690297 | 45.063792968927  |                  |
|         | 47.0874209746031 | 41.3755760434934 | 46.0364000143537 | 44.0687697278114 |
|         | 44.4031868028216 | 46.4861258030402 | 45.3530683538086 | 40.3452320167286 |
|         | 42.0424641526302 |                  |                  |                  |
| BLR1    | 41.4508241771315 | 37.2810767789306 | 41.2365089689635 | 34.9221408381038 |
|         | 38.2496050953547 | 39.2248354955045 | 35.8227939208521 | 39.4710743516517 |
|         | 37.2810767789306 | 36.4651112441576 | 37.2892641289258 | 39.8497227447888 |
| BLVRA   | 177.088290547513 | 81.4621222177298 | 150.801729138762 | 201.782740241526 |
|         | 67.222434502867  | 183.690616959682 | 116.74427460886  | 136.332339821167 |
|         | 113.026772174726 | 159.359051158123 | 140.976643799742 | 193.676161965973 |
| BLVRB   | 92.084526929319  | 57.0082102559228 | 84.4443931765378 | 69.8314582428552 |
|         | 71.7263663921367 | 136.517445122438 | 102.294142438313 | 116.967446594767 |
|         | 107.222176166001 | 120.60052672409  | 99.2749350936362 | 108.082240435027 |
| BLZFI   | 1050.05355467301 | 462.762837284748 | 670.958499409833 | 835.171475474151 |
|         | 388.336994961328 | 374.723141438448 | 689.738256133922 | 1564.55598228713 |
|         | 481.492404948275 | 1561.83892117664 | 1693.5377672895  | 952.16345035163  |
| BMF     | 63.1291723738553 | 45.9732108120834 | 46.8934754723474 | 62.5106969730855 |
|         | 43.1252272136667 | 44.0399598874356 | 51.6784647420677 | 52.9240098541574 |
|         | 42.589641010388  | 48.3119523820103 | 42.1454750198208 | 40.9149601380325 |
| BMI1    | 166.281651016457 | 318.369837408344 | 323.855522995794 | 259.812381486915 |
|         | 366.515210930763 | 419.182443507848 | 245.691073028699 | 307.550936236018 |
|         | 362.387413555537 | 241.486113826383 | 234.043251639296 | 387.867128019374 |

|        |                  |                  |                  |                  |
|--------|------------------|------------------|------------------|------------------|
| BMP1   | 124.866058211181 | 56.9463858443402 | 58.0852316663986 | 63.5107036952143 |
|        | 55.3951994031724 | 54.0865464112237 | 45.9368273382327 | 46.1159021593282 |
|        | 53.6446045619513 | 69.8397773950218 | 58.6176747515895 | 59.7118480874431 |
| BMP10  | 38.6454098044474 | 37.6383530120621 | 40.1985790927248 | 46.1673159982664 |
|        | 44.9936360641969 | 42.157627240486  | 40.2154497375715 | 38.956280281655  |
|        | 41.1742244762318 | 43.4885245598939 | 40.8225507267584 | 42.2577689927563 |
| BMP15  | 39.9697332660833 | 40.0527893189096 | 42.2577689927563 | 42.357910063876  |
|        | 39.1650142708257 | 43.7630587657205 | 38.941855825269  | 50.3972033014227 |
|        | 36.7267557061938 | 42.9866214102525 | 37.7384958256497 | 41.2437378488025 |
| BMP2   | 61.356483470053  | 260.279110870904 | 263.53897660224  | 83.877343750194  |
|        | 78.1275793755619 | 79.2701322339022 | 70.2635892414678 | 111.291087721139 |
|        | 66.0350709576651 | 325.275883498219 | 358.979854534484 | 141.572530741416 |
| BMP2K  | 48.2324547902378 | 54.8133029594319 | 51.0188883041845 | 84.7503257101143 |
|        | 51.940083408061  | 57.0775902639215 | 52.4898616460704 | 49.6534108863792 |
|        | 48.0163377492228 | 44.1765254182701 | 46.1960490865583 | 46.1592873342534 |
| BMP2KL | 40.8681871019812 | 38.9338521051669 | 37.6557714476853 |                  |
|        | 47.9915414951747 | 48.1473938886239 | 46.574682061365  | 41.3594868055879 |
|        | 40.6171774724171 | 43.6670755115848 | 40.6022003765153 | 39.7342718293432 |
|        | 42.6758568421347 |                  |                  |                  |
| BMP3   | 59.220967994972  | 48.3699741879723 | 60.4809187893259 | 32.1218888714537 |
|        | 41.2740822675592 | 38.8336427948187 | 44.8643898647322 | 31.8228237796461 |
|        | 41.863927676552  | 38.957687788868  | 42.6366765186182 | 48.5123041297835 |
| BMP4   | 77.1008255162781 | 72.4978364649174 | 47.5673419710251 | 52.0470560622094 |
|        | 66.9260611060819 | 110.223625398261 | 148.312100828662 | 76.011923854897  |
|        | 64.9890714157316 | 98.1433318215702 | 114.464626286414 | 95.0513978212968 |
| BMP5   | 40.6559419616644 | 53.8499082625091 | 41.3366779545815 | 43.8002456102021 |
|        | 54.2301964914419 | 55.3202238943712 | 42.357910063876  | 99.6392844274488 |
|        | 47.27543600687   | 58.7198210787055 | 65.7587943905649 | 53.840976437122  |
| BMP6   | 54.5358897781765 | 57.8876850634922 | 42.8270038153139 | 67.8978240198575 |
|        | 43.004943518025  | 46.574682061365  | 42.629412460409  | 39.5466975353131 |
|        | 36.8127605061228 | 40.7063426028871 | 46.7386599624801 | 59.0894921452893 |
| BMP7   | 41.5421429082231 | 209.31241212773  | 148.027258506301 | 48.1662933382789 |
|        | 147.388500451427 | 54.1440452292081 | 34.4570158133896 | 61.2343203799193 |
|        | 76.5444845463963 | 131.645714321903 | 127.345094323724 | 116.793627324217 |
| BMP8A  | 33.0463640202858 | 37.5469247328848 | 39.991353369336  | 40.4359177791566 |
|        | 39.9697332660833 | 35.5158505219112 | 42.629412460409  | 37.4484310268909 |
|        | 38.3418933808844 | 38.6454098044474 | 33.1645364749371 | 41.5536168238478 |
| BMP8B  | 61.1022920882065 | 48.1627097465883 | 53.4743535852344 | 44.4367387274922 |
|        | 48.8381507187986 | 42.6575535390785 | 60.6548851977964 | 64.6316818494785 |
|        | 66.8632294055679 | 51.1169368198437 | 54.8532558909227 | 55.4635297192076 |
| BMPER  | 43.0001432913058 | 38.8336427948187 | 36.5474283500601 | 44.6905691366696 |
|        | 39.5595233162192 | 38.7340969861754 | 39.6535880152834 | 36.1375121409002 |
|        | 34.226171989766  | 35.0668743708816 | 29.6891949090828 | 35.4484652445078 |
| BMPR1A | 62.5968484440453 | 80.882176929636  | 89.3868257841517 |                  |
|        | 50.7774722329703 | 68.8362790228976 | 140.853812988562 | 75.8779316255794 |
|        | 64.7838753386185 | 78.6602721596257 | 92.4534854832186 | 89.4111455826308 |
|        | 117.191735492199 |                  |                  |                  |
| BMPR1B | 32.742439449766  | 36.1232327599945 | 45.063792968927  |                  |
|        | 37.4223289687135 | 43.5544347011646 | 45.1873487463472 | 34.0777108441756 |
|        | 40.4359177791566 | 39.1790517315259 | 39.9948390976317 | 38.1835938174625 |
|        | 40.4639532172338 |                  |                  |                  |
| BMPR2  | 177.584394977912 | 174.368595478868 | 157.927114480316 | 170.804822846738 |
|        | 133.893108529325 | 221.598637828404 | 98.5663841503803 | 170.475212920685 |
|        | 204.273912273411 | 177.80178351875  | 164.547318765586 | 195.018775118528 |

|        |                  |                  |                  |                  |
|--------|------------------|------------------|------------------|------------------|
| BMS1   | 174.021676013865 | 133.192618821838 | 150.545989010484 | 120.284321694275 |
|        | 165.322633260592 | 143.973063517706 | 217.065944053174 | 160.638833695464 |
|        | 204.63343271995  | 152.792457231813 | 160.203825526096 | 155.252915611651 |
| BMX    | 39.6279144647521 | 43.4031723677362 | 38.2523289394497 | 39.9182914210537 |
|        | 38.8964578286293 | 45.0241191707651 | 41.7656868106485 | 41.7419877611072 |
|        | 39.3592387366314 | 39.7397636748413 | 41.0554874392252 | 42.5294887665766 |
| BNC1   | 39.4987030972173 | 38.855011124887  | 40.6451121071568 | 44.2142581488029 |
|        | 39.4693871570028 | 41.9543948167375 | 40.4359177791566 | 46.6301159152913 |
|        | 40.1730675449465 | 41.057460518552  | 44.528828405681  | 40.6312687664188 |
| BNC2   | 108.649424858333 | 51.0175677516029 | 41.8751578329365 | 64.6945454069792 |
|        | 46.4343327861696 | 166.910579215196 | 67.0455170947389 | 40.2382908228517 |
|        | 36.5393857306744 | 107.122319086614 | 98.5609311953771 | 88.4819048592858 |
| BNIP1  | 66.4399491500833 | 56.0642694832108 | 74.6514558411477 | 56.9299697426319 |
|        | 66.6118713143653 | 75.0310858627394 | 82.0174591986046 | 64.2512089157122 |
|        | 97.8764110456132 | 68.8167148906225 | 64.830448408529  | 74.5173894803763 |
| BNIP2  | 204.130491885587 | 292.247095517604 | 171.746499373501 | 455.774407260725 |
|        | 297.187417426993 | 279.632025097952 | 288.597205372736 | 224.749607192071 |
|        | 305.279475274196 | 243.763402918148 | 262.024495926094 | 263.44529683749  |
| BNIP3  | 931.401929277001 | 123.281175151414 | 170.105455298636 | 379.865108456536 |
|        | 295.127975044241 | 389.994289973076 | 593.801086643125 | 301.525915314179 |
|        | 53.9287524861617 | 358.194667053419 | 292.93036571522  | 562.258108316474 |
| BNIP3L | 257.761541860837 | 123.597489107285 | 217.456127221867 |                  |
|        | 395.298033031033 | 86.1633564934019 | 277.367257933324 | 120.231435193839 |
|        | 87.1183334887694 | 221.22852405053  | 186.965367827758 | 180.663636520073 |
|        | 280.202284365004 |                  |                  |                  |
| BNIPL  | 134.407474121421 | 78.1761025629963 | 103.14577985944  | 42.357910063876  |
|        | 49.0322894371656 | 45.2852528185486 | 47.3661873039785 | 227.94699237549  |
|        | 49.9547657591437 | 161.405959689541 | 123.247207157645 | 81.7566533443175 |
| BOAT   | 45.8574226904273 | 45.2098033805679 | 43.917817324545  | 51.1313686723929 |
|        | 45.5198200633333 | 43.6427759607073 | 51.8667932650345 | 57.8765910878975 |
|        | 41.8197029429821 | 45.3894119568143 | 45.3597029614942 | 44.293922970134  |
| BOC    | 53.1309801459151 | 41.6466169548846 | 36.6522278218553 | 42.1273928203021 |
|        | 44.147557390293  | 90.8335894699136 | 33.8558232866797 | 40.931294690669  |
|        | 40.6957787921451 | 57.165971310746  | 55.6972661824064 | 43.5738557773903 |
| BOK    | 208.915145509698 | 140.853812988562 | 162.833785414988 | 184.087380444203 |
|        | 91.2681347227088 | 136.103246130094 | 139.855023065402 | 118.341308125578 |
|        | 157.677866955988 | 156.844010597219 | 133.401306624347 | 128.635811501506 |
| BOLA1  | 54.1745577382276 | 49.6203214143464 | 60.4809187893259 | 38.2041059863839 |
|        | 58.9875400392427 | 49.8472708021525 | 63.0119737420787 | 55.1109784383525 |
|        | 52.7512110769042 | 51.1169368198437 | 50.8826620053386 | 54.8630527326985 |
| BOLA2  | 821.922096305069 | 429.725397949276 | 632.577797921655 | 476.421959423835 |
|        | 1120.83891847181 | 354.634819362978 | 573.832332097619 | 1652.85734308754 |
|        | 320.555790243104 | 307.445116836976 | 270.78959225422  | 314.609371608151 |
| BOLA3  | 561.509463439533 | 414.062259640915 | 427.199940706169 | 363.108973029004 |
|        | 781.923984640049 | 417.4609354305   | 607.042450917813 | 577.276184555955 |
|        | 607.431621448599 | 198.54718783437  | 244.872078761743 | 458.861461526841 |
| BOLL   | 38.7537364570873 | 43.1567024035183 | 41.0356368374708 | 40.2406186868086 |
|        | 40.5158867964016 | 40.5703581862752 | 41.0808257270221 | 40.1797228736088 |
|        | 40.1738310955128 | 38.8274796955507 | 39.3770402804901 | 42.0798970785317 |
| BOP1   | 575.863848923457 | 494.300858189605 | 278.453446231317 | 257.194689822426 |
|        | 850.656711617458 | 289.472303440614 | 342.146013966482 | 362.196116025799 |
|        | 513.891389190131 | 272.930242946726 | 344.985739524681 | 205.806939441015 |

|        |                  |                  |                  |                  |
|--------|------------------|------------------|------------------|------------------|
| BP75   | 59.8248482438562 | 63.1780854659428 | 91.9919654450652 | 47.9915414951747 |
|        | 55.8173045043348 | 67.6817814091697 | 68.5725871332774 | 66.5234828659154 |
|        | 63.785471218558  | 58.6439719071099 | 49.5923712603197 | 86.0230765383602 |
| BPESC1 | 44.7044140979108 | 38.8336427948187 | 42.5406888281114 |                  |
|        | 38.4208429103799 | 49.32293280121   | 40.4359177791566 | 36.5352572191451 |
|        | 44.7044140979108 | 43.7630587657205 | 44.4652605017595 | 40.3452320167286 |
|        | 43.2776458914333 |                  |                  |                  |
| BPGM   | 50.7903824729818 | 51.1621379498014 | 59.5907693818143 | 69.9652162720742 |
|        | 61.5922826482868 | 57.678188678075  | 92.1817062395346 | 111.071209057746 |
|        | 62.0660509811111 | 55.0016608333828 | 48.1682125052975 | 56.7139808194115 |
| BPHL   | 390.647843814517 | 302.978457293429 | 356.948763043851 | 128.157032116902 |
|        | 578.820199675035 | 278.140612054333 | 402.412173952792 | 275.975192937951 |
|        | 507.375704144286 | 266.9457657143   | 326.805803266857 | 285.254985583609 |
| BPI    | 38.304249186058  | 42.7775752471711 | 35.2101597814352 | 42.5664883002833 |
|        | 43.1252272136667 | 39.4953494583071 | 39.7576136507593 | 37.7612949798895 |
|        | 38.9006788676407 | 40.8049408996274 | 44.4688999098904 | 38.6454098044474 |
| BPIL1  | 36.2496364442264 | 44.1239711172417 | 38.2280071951674 | 42.357910063876  |
|        | 39.4693871570028 | 37.5887129572848 | 40.0052661202207 | 33.4534810696886 |
|        | 39.0775870687758 | 42.4594149893798 | 37.5583886316038 | 36.7762265039864 |
| BPIL2  | 35.0202257459026 | 35.7393138893354 | 40.6737160001291 | 39.9697332660833 |
|        | 42.4864576619427 | 36.2015763253919 | 40.0052661202207 | 43.844855336215  |
|        | 44.2607789091176 | 38.528621456378  | 38.1835938174625 | 37.8490162439785 |
| BPIL3  | 34.8099089553046 | 39.5050383901884 | 36.2683886571585 | 43.8002456102021 |
|        | 44.0451487108213 | 35.6125439901743 | 43.4544762830742 | 38.745552403895  |
|        | 40.6957787921451 | 39.8873706855774 | 43.0971787292711 | 46.0633179231318 |
| BPNT1  | 90.7551885299639 | 177.29096218424  | 209.860757709908 | 145.676955166566 |
|        | 154.355197155161 | 117.907440794926 | 286.11425202743  | 181.488068017883 |
|        | 116.576093937704 | 85.9910479975356 | 145.01315947031  | 100.188736523729 |
| BPTF   | 55.9563971339766 | 51.909968572392  | 50.6987358483181 | 63.092106057211  |
|        | 52.6226745117396 | 61.5824518349507 | 48.6395795163502 | 48.381918148032  |
|        | 57.5430365699386 | 46.9598474201212 | 53.655233033193  | 55.5276281380084 |
| BPY2   | 38.8336427948187 | 43.3458769998118 | 40.4882741869718 | 44.3440839686558 |
|        | 41.0885562160946 | 35.4484652445078 | 39.8695929627783 | 38.3269307390572 |
|        | 43.5140141743856 | 41.4812544772644 | 40.7725311293918 | 40.4192415967414 |
| BPY2B  | 41.7397731376692 | 40.8880530359822 | 44.1452943804044 | 40.9607305725196 |
|        | 43.9450023643394 | 42.0574848021044 | 54.8074655158941 | 40.4359177791566 |
|        | 51.2776048338    | 40.5090849993014 | 43.1931731665131 | 40.8681871019812 |
| BRAF   | 53.3059058105836 | 79.1039287828151 | 50.8303921211581 | 54.8412943008635 |
|        | 88.3954618645976 | 46.7800033479223 | 74.1353964055485 | 70.5322939116406 |
|        | 58.2401724760744 | 65.5349012839562 | 63.3544794716167 | 64.4156641487994 |
| BRAP   | 37.6397652536077 | 40.7952353240579 | 36.6522278218553 | 30.9241129241985 |
|        | 39.0564222526273 | 38.9378717994178 | 30.9403229851671 | 37.0390589468421 |
|        | 38.2215591930186 | 43.2988017098387 | 36.6298807161755 | 34.9138625012006 |
| BRCA1  | 53.9517841438975 | 51.9595173266422 | 42.2061277250364 | 42.4061338151892 |
|        | 63.6172860741922 | 42.9083290030575 | 54.4934782594218 | 47.0940613507321 |
|        | 54.0626629538146 | 41.9226500021333 | 39.6403089864678 | 48.27609330316   |
| BRCA2  | 48.1952521496489 | 40.9731067463382 | 40.301483914446  | 41.1886975241176 |
|        | 42.0709558258414 | 40.5281496800812 | 44.3440839686558 | 43.9366081640576 |
|        | 46.0106098064475 | 40.8049408996274 | 39.6403089864678 | 41.9430737035925 |
| BRCC3  | 80.8943070653517 | 103.139459009593 | 77.1614179978243 | 81.1189042503645 |
|        | 137.239944506217 | 89.9789975503195 | 103.447730395424 | 126.360723656793 |
|        | 89.2056902297352 | 84.0691608193405 | 73.408861359425  | 85.8154958329408 |



|        |                  |                  |                  |                  |
|--------|------------------|------------------|------------------|------------------|
| BRD1   | 84.1254258487497 | 100.066535982734 | 110.973625869849 | 75.0377156190383 |
|        | 130.002385558757 | 92.9820860411485 | 98.9988668602468 | 73.2037966614621 |
|        | 113.367264677544 | 79.262977183608  | 87.6689055777294 | 75.6428949408034 |
| BRD2   | 1019.67015337432 | 923.470702344816 | 616.912306849151 | 877.673009984357 |
|        | 751.150916058018 | 602.726022292973 | 790.786577596971 | 915.936211119242 |
|        | 810.201903561366 | 1062.93431683428 | 1040.97380790412 | 764.571579067138 |
| BRD3   | 378.964387825252 | 366.915943380617 | 148.906660152784 | 173.013258797349 |
|        | 228.882072078733 | 280.680953068339 | 498.958550919515 | 280.968337220318 |
|        | 224.266559865201 | 354.158105175308 | 378.964387825252 | 305.554059609771 |
| BRD4   | 41.6354649482853 | 46.857923273572  | 46.8928145400696 | 43.074472921841  |
|        | 47.5647821785529 | 41.7309289572934 | 47.2927436772465 | 44.5544727111028 |
|        | 45.0997987980157 | 40.4544974307172 | 45.3649611783915 | 43.551658853562  |
| BRD7   | 229.792906003602 | 158.637047990511 | 236.488376031891 | 151.01326330819  |
|        | 104.072423445726 | 165.029434090892 | 222.16475904496  | 196.465477936749 |
|        | 209.004669589169 | 158.685201053359 | 168.225699005719 | 228.499788774214 |
| BRD8   | 107.232979387172 | 116.51037006692  | 91.0443726041992 | 85.1847490113446 |
|        | 88.3212200388592 | 101.177486898065 | 72.2577390063259 | 113.336158464071 |
|        | 119.051596183968 | 91.8251275769679 | 102.24202987437  | 93.0474674148534 |
| BRD9   | 366.129480083279 | 269.745248423773 | 251.027270265657 | 178.289913291111 |
|        | 576.140066807763 | 243.672418126374 | 427.972184856393 | 340.553073657744 |
|        | 235.222472959869 | 298.14782785085  | 353.868749867979 | 219.805214090875 |
| BRDG1  | 39.266565827316  | 39.1982470626863 | 38.2280071951674 | 41.6564075217517 |
|        | 45.8051846088552 | 35.4142595025086 | 42.7431359850339 | 37.1317006162938 |
|        | 36.7267557061938 | 41.0057887014368 | 35.6041926503637 | 39.9519547348106 |
| BRDT   | 38.4278323739711 | 37.03486806852   | 39.3344387353654 | 40.5991006167568 |
|        | 40.3124262005404 | 39.3638967048812 | 35.3362091871364 | 37.4484310268909 |
|        | 38.8507804383261 | 39.6719190054379 | 37.9607839934735 | 38.6454098044474 |
| BRE    | 200.93077689667  | 214.484877083166 | 212.967855232105 | 175.632783805966 |
|        | 110.729504563799 | 212.117653688186 | 308.568617575909 | 234.113622230498 |
|        | 167.626012561905 | 175.632783805966 | 167.999042735556 | 169.251790128723 |
| BRF1   | 49.4151347850687 | 50.0748292497578 | 46.7508829977587 | 42.4580504587581 |
|        | 54.8630527326985 | 48.1324253195354 | 57.4508537244497 | 63.6476735543021 |
|        | 61.0845101400379 | 61.1851254827343 | 54.2683296643972 | 56.233217375698  |
| BRF2   | 169.75692324104  | 81.2182827624857 | 120.401643722713 | 101.144615206297 |
|        | 169.561107057293 | 150.801729138762 | 136.062864107443 | 173.944080519006 |
|        | 114.304598397252 | 224.635749257133 | 211.137455821181 | 136.541379502691 |
| BRI3   | 744.080606078086 | 653.089523541803 | 668.584452504579 | 1792.42490815074 |
|        | 600.34379987143  | 1149.02954135912 | 705.283979182062 | 453.260719561292 |
|        | 590.139974503603 | 469.78210773245  | 536.73426937255  | 578.311131274653 |
| BRI3BP | 73.4853298204744 | 83.555058970129  | 66.4079972657486 |                  |
|        | 61.4518104624768 | 83.2652824564032 | 50.6774883370457 | 97.095992167029  |
|        | 62.9364422691302 | 97.4709987978999 | 53.7507429765038 | 53.7423898357583 |
|        | 65.564930068976  |                  |                  |                  |
| BRIP1  | 41.9407041937973 | 43.4396866157171 | 44.8872784170036 | 38.2041059863839 |
|        | 43.4544762830742 | 42.8598805316863 | 45.223075311113  | 43.4544762830742 |
|        | 38.7298222155532 | 46.5650556481721 | 41.9083581529276 | 39.5418280570561 |
| BRMS1  | 506.75912743556  | 351.188432232165 | 439.770250139925 | 460.340300658834 |
|        | 494.231747291283 | 267.261896105785 | 609.243908604949 | 1012.0373748933  |
|        | 461.83420090894  | 406.104588997462 | 431.353025968649 | 268.936151471133 |
| BRMS1L | 50.2663821500171 | 66.0479079234982 | 67.1299518044849 |                  |
|        | 51.2973486610884 | 57.2647835956181 | 110.036754099036 | 56.0515443021293 |
|        | 46.8482302725294 | 65.9900865113645 | 60.3816817102326 | 62.0404348860702 |
|        | 66.53831442217   |                  |                  |                  |

|         |                  |                  |                  |                  |
|---------|------------------|------------------|------------------|------------------|
| BRP44   | 262.98784416804  | 319.871452890512 | 897.198663109723 | 316.185342210304 |
|         | 537.213035625492 | 439.862941165528 | 721.887210480162 | 275.314994786888 |
|         | 488.277500837251 | 281.527450183603 | 270.303708972854 | 387.631477822638 |
| BRP44L  | 197.040881690021 | 328.855843739232 | 286.832539203237 |                  |
|         | 375.818861583151 | 184.808179948172 | 438.50123471613  | 183.584085676174 |
|         | 214.823948126294 | 267.170081805168 | 294.908371819124 | 261.51893439249  |
|         | 409.554706384667 |                  |                  |                  |
| BRPF1   | 374.026381773215 | 420.401914084346 | 334.016152807947 | 323.095468495074 |
|         | 572.19538884395  | 289.716911324484 | 552.162906190653 | 715.662312404643 |
|         | 289.975375372371 | 374.096934824025 | 402.571146447946 | 260.383969219887 |
| BRPF3   | 189.111092737256 | 151.088035451997 | 113.18951586976  | 96.5813769696577 |
|         | 120.309345127552 | 119.015431849218 | 123.455270940015 | 69.6473843718254 |
|         | 129.37368123079  | 109.386655134289 | 103.376225272425 | 94.8036856848998 |
| BRS3    | 39.7576136507593 | 41.3610369241157 | 44.0451487108213 | 47.6687908290818 |
|         | 49.1928206164702 | 41.0582900711341 | 40.3302268293707 | 38.5457716679071 |
|         | 37.1820543575123 | 40.4136535208406 | 41.0808257270221 | 38.2350720635382 |
| BRSK1   | 141.255712367708 | 125.027865666372 | 141.577762652792 | 484.968116511768 |
|         | 281.262083731954 | 194.666769955149 | 85.9692990407066 | 264.659866487253 |
|         | 57.2716485658185 | 127.093495914275 | 150.221698290502 | 94.4769283676944 |
| BRSK2   | 41.5421429082231 | 35.2143190355414 | 40.7620472083159 | 37.651298468202  |
|         | 38.1644569189523 | 39.8455060654531 | 44.4639405506967 | 43.5544347011646 |
|         | 36.7267557061938 | 33.7883338848419 | 42.170702295259  | 40.7704587752083 |
| BRUNOL4 | 43.2135791259317 | 41.2283968464263 | 41.3366779545815 |                  |
|         | 40.8084239472012 | 39.2010256871265 | 42.712908390565  | 42.4386427013314 |
|         | 43.1567024035183 | 39.2809305246091 | 40.6500508575994 | 41.2324382727265 |
|         | 42.9285286409526 |                  |                  |                  |
| BRUNOL5 | 39.266565827316  | 45.7317208802318 | 38.5045333213784 |                  |
|         | 41.4273122914951 | 50.7615314686244 | 40.4359177791566 | 39.5496902678788 |
|         | 44.293922970134  | 42.6366765186182 | 38.1042454705119 | 41.9083581529276 |
|         | 41.5536168238478 |                  |                  |                  |
| BRUNOL6 | 40.2543341073001 | 45.7979032939211 | 49.6347864008749 |                  |
|         | 58.3475983630509 | 43.1252272136667 | 49.4157684139858 | 40.2154497375715 |
|         | 46.2779564481158 | 47.1744296124496 | 53.0357938671646 | 49.5923712603197 |
|         | 56.1875519519366 |                  |                  |                  |
| BRWD1   | 52.4570161184697 | 78.9563955412096 | 83.3322777515023 | 56.6458456890715 |
|         | 76.4339818310247 | 77.4307558516809 | 79.4158467034017 | 83.1702007661831 |
|         | 63.4753448572245 | 65.6260887743331 | 66.9494774452406 | 67.2500663500334 |
| BRWD2   | 84.2104160850167 | 98.4763347474813 | 132.223745961048 | 95.6834075721066 |
|         | 92.3901719424121 | 87.6960277122561 | 99.5844079573552 | 84.1639779987105 |
|         | 83.7829283976292 | 98.0967511777819 | 97.7965639721152 | 102.899135663993 |
| BRWD3   | 38.385865183581  | 40.0527893189096 | 43.5710871617107 | 47.0874209746031 |
|         | 49.7235523248653 | 34.0045980663271 | 42.357910063876  | 43.0390857698452 |
|         | 51.8083208406279 | 43.0919221375514 | 40.723990462047  | 47.5025821041537 |
| BSCL2   | 352.132645260048 | 323.048740324895 | 345.942093303061 | 402.794855141389 |
|         | 519.351335801817 | 328.46798329618  | 577.276184555955 | 714.075528895169 |
|         | 409.554706384667 | 547.442608452594 | 468.98857415608  | 336.737571879156 |
| BSDC1   | 185.563590013028 | 295.856741468603 | 206.337508331566 | 186.866378606003 |
|         | 251.105933757167 | 207.513604688444 | 263.492132556601 | 460.602626145229 |
|         | 163.458716079887 | 298.848001894468 | 308.931677425404 | 266.9457657143   |
| BSG     | 1047.33749100342 | 1111.89793143647 | 692.630044242985 | 544.946796643478 |
|         | 1029.12917222294 | 854.712488657987 | 1055.69506483576 | 848.079114196986 |
|         | 993.626865290891 | 788.232434009173 | 911.661341702443 | 537.471287449696 |

BSN 45.9090659324223 41.8848959280916 37.7384958256497 42.8235313007746  
 49.9493230064613 42.9695585740813 41.4742337714895 50.9933795450314  
 37.4540772310118 44.0409178714232 45.6348103033479 39.2469742642337  
 BSND 41.5421429082231 36.5219488315447 48.1331309338997 39.7411455670172  
 43.844855336215 42.4580504587581 41.8315602975157 41.7419877611072  
 43.3744503319109 41.1222709786153 48.2910530887214 41.5536168238478  
 BST1 48.4849194706125 44.8529259387308 61.356483470053 82.5279746006378  
 52.8190882379316 99.4846339370133 92.4534854832186 46.7980335276155  
 109.374838860558 53.7196173866021 48.4717951775049 47.6040671292013  
 BST2 315.696895080135 368.660803187338 667.583623414832 300.486048273148  
 516.349618186681 211.701234819986 79.4832790698673 342.475405815033  
 641.103199748891 113.655306804539 640.407302868904 148.944852825695  
 BTAF1 202.459251553516 292.86576686019 266.250887288858 303.139550962377  
 216.943972794603 225.794026573235 233.201890340549 298.848001894468  
 242.83357283464 441.247306467645 324.767804809056 325.769076169162  
 BTBD1 72.3388488936832 100.535211780514 74.9113162056974 79.7937658787441  
 125.052841200703 110.637910297739 75.0092868910417 58.4920021605316  
 76.2591822114739 58.5831897269778 55.854474649572 108.213380368446  
 BTBD10 95.042308285667 125.290426098227 136.236041346288  
 100.001150612051 96.5030525416431 140.629562742418 81.9504925867759  
 64.0476795495651 151.245804544502 117.502489192855 120.679433440203  
 191.116764060948  
 BTBD11 49.5666074434383 58.0655276913048 102.483081702338  
 49.0881325319702 60.7770994863828 41.399074748665 42.1046072075724  
 60.1796637353976 82.9995913411894 98.3733183587283 71.5836731059913  
 75.8331683850176  
 BTBD12 81.7117547901526 87.9963662401769 93.9472621843566  
 71.7167037224069 75.3580625318157 63.8740412329753 75.5830548489892  
 57.2350830635912 75.2337946941103 64.428683021978 73.0970339739187  
 67.4197263416701  
 BTBD14A 139.311807081199 69.2082505043031 65.6620676514157  
 98.5663841503803 104.486555491331 64.6835308827804 89.7242042805798  
 93.0474674148534 74.3394153125605 49.1928206164702 53.5698357689852  
 56.9379721393904  
 BTBD14B 53.1309801459151 46.6314009405034 46.7508829977587  
 42.1273928203021 47.4548471240051 53.2046867327331 43.5627649099623  
 52.0503062610092 57.8772482723463 45.3530683538086 51.6414075056938  
 38.745552403895  
 BTBD15 39.9697332660833 50.4022543872993 47.0940613507321  
 49.7350276169552 51.3511088648386 52.2089306840125 50.5252048155459  
 52.7787010032051 59.9770720847728 81.915829566737 63.1566669782858  
 62.3470274683312  
 BTBD16 43.2724556187214 1301.07436212673 2164.51925341969  
 58.0218262176065 74.5758811681995 73.0247140074919 65.644767142472  
 100.114114765033 563.573152902421 1950.93175239958 1509.047531111016  
 1845.34855798442  
 BTBD17 39.3709357615493 33.3643994200057 37.9482157381008  
 34.5425384901279 40.148780650831 44.9896851005259 38.1793598983615  
 36.3405039629059 40.4997186069494 34.064698871541 35.6041926503637  
 42.1537476443423  
 BTBD3 97.6205705034407 137.016387648703 75.8201286658785 63.1604223919703  
 103.513421757522 107.808744445896 73.5700402711904 60.3481762331447  
 75.949657568749 98.5746416750459 97.3756238014731 108.138395958121

|        |                  |                  |                  |                  |
|--------|------------------|------------------|------------------|------------------|
| BTBD6  | 263.832968124343 | 211.701234819986 | 273.070365538675 | 181.488068017883 |
|        | 258.757703729905 | 262.37779288036  | 232.320396482547 | 195.58977358589  |
|        | 229.881790983135 | 296.463473585355 | 268.38649000825  | 219.616289279562 |
| BTBD7  | 77.1287755867582 | 62.5528124447176 | 77.518381991736  | 72.3388488936832 |
|        | 65.1129635608639 | 68.2428802339852 | 59.6105564219031 | 61.3864512710242 |
|        | 92.9894133685392 | 104.964345794911 | 87.3508610599789 | 81.8426140611297 |
| BTBD8  | 37.6817357354748 | 37.8685585043426 | 41.1367478979484 | 47.0874209746031 |
|        | 42.0709558258414 | 45.0283997415478 | 41.0871827071116 | 40.8833572570383 |
|        | 43.423558862426  | 44.3303034026662 | 43.1931731665131 | 44.3521099857368 |
| BTBD9  | 49.7188990489616 | 41.554942319225  | 46.2625470410195 | 48.665578118898  |
|        | 51.5888395924843 | 59.9174456081704 | 47.1345949868029 | 39.1652965788406 |
|        | 52.0583273941813 | 55.2214187655851 | 50.7903824729818 | 52.1918130336397 |
| BTC    | 42.3433931248155 | 49.1283590719461 | 49.6347864008749 | 44.9370339275041 |
|        | 50.2163892855092 | 61.3620062177524 | 53.3111230705754 | 77.3999378505514 |
|        | 56.702421372165  | 53.6429962450784 | 55.9269493191353 | 50.379587451669  |
| BTD    | 72.9154861179393 | 98.7446830481164 | 93.9472621843566 | 89.1290937615998 |
|        | 94.4129246851651 | 100.305262467668 | 95.3754438202863 | 73.8374823243007 |
|        | 88.8772406115484 | 116.311176407088 | 86.8330533522204 | 114.016824404095 |
| BTF3   | 1445.73674428909 | 3202.8848520816  | 3385.65959808808 | 1468.75291542154 |
|        | 1824.79010714035 | 2306.14613042834 | 1387.28483887704 | 1375.14388134842 |
|        | 2294.75523373329 | 2206.44541412808 | 2150.8715161597  | 3166.48568397766 |
| BTF3L4 | 184.808179948172 | 209.860757709908 | 179.186381381821 |                  |
|        | 159.925087917307 | 230.787791652978 | 242.899629257173 | 167.05554959607  |
|        | 115.801367301965 | 184.50283792606  | 104.504444994123 | 103.491711140137 |
|        | 187.767803297395 |                  |                  |                  |
| BTG1   | 892.754288149486 | 1249.41227924272 | 1071.64675274806 | 2678.43227619157 |
|        | 607.431621448599 | 1401.46625360427 | 947.656220635965 | 1058.61208471961 |
|        | 1442.72006787259 | 742.317490569544 | 1136.88710104691 | 970.092441721494 |
| BTG2   | 150.262748333939 | 2133.78836857697 | 1180.7204565402  | 1125.81685334899 |
|        | 735.083155673644 | 2435.70120719503 | 463.022816882856 | 729.342532316666 |
|        | 724.881002237334 | 1792.42490815074 | 1039.06999658544 | 838.974043046676 |
| BTG3   | 188.767243497644 | 227.439319520245 | 331.762920362224 | 332.830805115112 |
|        | 234.477015135311 | 228.845881709556 | 382.050584680669 | 187.923050034941 |
|        | 273.032063533642 | 156.36242271528  | 179.285390561592 | 318.234214341679 |
| BTG4   | 41.8409927585705 | 40.4359177791566 | 41.2365089689635 | 39.6292788039793 |
|        | 38.8456942580061 | 45.4882438975269 | 34.2773859804062 | 38.1835938174625 |
|        | 43.9450023643394 | 40.8970401536578 | 37.3687900733549 | 41.6550823405646 |
| BTK    | 53.3059058105836 | 74.4696354388511 | 47.2055133646385 | 156.476627024647 |
|        | 48.0234896130991 | 89.3168921945222 | 48.6395795163502 | 52.1788489555942 |
|        | 38.4344387289956 | 45.0155543555707 | 42.0750889188255 | 50.4847465816184 |
| BTLA   | 49.540449125788  | 50.2163892855092 | 45.3675390992851 | 83.014860007187  |
|        | 43.4885245598939 | 43.8308097066396 | 43.2721716572958 | 48.381918148032  |
|        | 43.2761454096265 | 44.4652605017595 | 46.9246510824681 | 41.4508241771315 |
| BTN1A1 | 33.8558232866797 | 33.5924201549249 | 40.6737160001291 |                  |
|        | 40.3180310664156 | 33.0463640202858 | 32.9046688061235 | 34.9344532055397 |
|        | 34.8949555140527 | 33.3643994200057 | 35.3849221682845 | 34.6366195121669 |
|        | 32.7800533388945 |                  |                  |                  |
| BTN2A1 | 94.4618437533343 | 101.192523227755 | 84.5998418020787 |                  |
|        | 96.4913003384143 | 95.2833228196616 | 109.607667469015 | 213.073369426342 |
|        | 146.892027926888 | 70.9767460064692 | 78.1683130800805 | 102.170521765252 |
|        | 92.3388129097482 |                  |                  |                  |
| BTN2A2 | 45.0283997415478 | 49.5384557467329 | 49.6978906361694 |                  |
|        | 52.403135056701  | 44.2607789091176 | 40.4359177791566 | 77.5813459454823 |

51.2189089780361 51.9545473262296 55.3477556906605 46.2560238004757  
44.3521099857368  
BTN2A3 43.5710871617107 37.1685072112618 40.301483914446  
39.9697332660833 40.9950639693255 36.1190722948669 42.2577689927563  
40.831207953647 38.8271346375425 35.195364621675 39.2542963855807  
42.0424641526302  
BTN3A1 69.4501305462809 97.4327882336954 89.4111455826308  
98.8296358083144 53.4751250621694 60.4837400912239 100.891869710611  
108.138395958121 68.0796261751272 84.2434917159728 91.9375312869437  
62.8485724004124  
BTN3A2 70.6784633355742 158.156217755244 216.526205739151  
151.99110418225 77.1287755867582 102.980622026276 169.251790128723  
131.57403028894 100.234661597218 79.4916415027015 99.5125674355716  
94.1128427766432  
BTN3A3 86.0796981361148 88.1413320312949 75.9174504780598  
76.9373289454707 61.5236837309467 70.5699797830702 91.0154871536701  
78.9900928241723 58.174555206394 62.2025996860055 58.4816190076338  
52.5752569429057  
BTNL2 46.0920218698606 40.716553247236 59.3549213146532 54.2886483704949  
41.6806984441849 52.8421046802739 45.7452456977857 40.7311497914871  
47.9035532886869 51.0055825931636 38.6662194645633 45.2783024981315  
BTNL3 40.5320714850602 44.714975193517 41.7419877611072 42.6322698334662  
39.9220998751503 40.5940318808889 42.7431359850339 41.9315419791594  
42.7522261624826 42.4247468951743 42.5805189064329 41.0920120134247  
BTNL8 37.3875631460917 35.7393138893354 37.4302011516587 39.7411455670172  
35.8429598823818 37.2686490268265 39.7576136507593 35.8345448206824  
35.7973685350741 33.2987269789328 34.9428206949566 36.9162349182365  
BTNL9 39.0620487644635 44.9370339275041 45.4865173433646 46.614092935749  
44.9936360641969 50.8533737532786 46.7100796279384 50.9933795450314  
41.4636047919453 37.920964499903 42.8263096141654 42.357910063876  
BTRC 45.0985088502363 50.2163892855092 49.1718303518849 44.4367387274922  
38.7864161493321 49.3654837541353 45.3597029614942 42.5435283762933  
49.0986627051784 51.0055825931636 47.4964755141472 49.9419897484381  
BUB1 112.122619608668 147.471179343348 89.4747568145717 63.9570596163747  
190.921576470336 52.8421046802739 142.614006543733 153.35286239647  
153.165464817911 49.5265949137207 39.153226699662 44.9070250604284  
BUB1B 41.7397731376692 44.1239711172417 44.1452943804044 37.0732977341185  
58.4383854340181 43.1826328292558 43.0930293831497 47.4740726032707  
43.4656637536244 32.9003644440608 45.9104478407175 41.863927676552  
BUB3 229.881790983135 413.516548092483 348.206465194205 273.320144423733  
334.016152807947 209.61080762285 424.539111965342 332.830805115112  
288.642294976 358.194667053419 278.850071205987 283.111920665176  
BUD13 77.9057333780847 83.1308709614708 96.317642888143 85.3754356809649  
107.094663242259 68.3234331335073 89.9284109077375 92.804679821289  
76.7820250461545 72.6549171886783 79.4832790698673 74.3442318693865  
BUD31 837.959914510114 581.2449195499 427.540236966999 596.84269596976  
483.20917825594 598.970109654466 598.970109654466 648.380417557148  
711.773459577386 359.889643461047 422.237766234202 452.351360652434  
BVES 55.1306642449627 45.3486182278177 41.6079958749402 46.1673159982664  
43.7517118200398 94.3953345963359 57.8205747266529 49.1303869398773  
47.2106324363708 73.0070079786149 63.0383605052305 68.0388928513985  
BXDC1 593.345148568451 284.942182200489 344.133384411423 352.019218177371  
278.507764368929 357.762505796238 210.348939191359 1789.07186722972  
207.726011653345 366.998712124711 258.913621521866 360.900649927623

BXDC2 309.994784298282 444.320714312359 298.771150048863 183.364949777567  
456.023620287811 280.968337220318 770.715044136717 1379.51119430451  
345.615640348066 183.613579501306 204.944787289897 332.276510973163  
BXDC5 123.868848519181 120.221914344372 103.43536623122 92.6230008876347  
75.6471706262645 96.2490896573253 116.74427460886 115.052948380817  
85.1920126487447 99.1438953564062 75.8056934060866 130.293915348934  
BYSL 377.409970666607 162.628603963754 169.459466601559 114.363816429963  
351.700618429121 153.992331037033 238.697159169213 191.955732544426  
210.605371352247 152.187430924861 144.546897317106 150.562062400737  
BZRAP1 52.8427643366617 52.0268699306396 48.0191002461099  
59.4674205670657 45.2556760873335 57.1752846228778 51.5967098638347  
50.0526763693329 69.8899273527731 78.5141640924736 75.0237373605584  
61.7502624458447  
BZRPL1 43.1805016690297 37.920964499903 36.9795961564828  
35.314469458379 32.5318884330468 39.8455060654531 37.0564573649223  
38.8495095797881 38.7298222155532 34.2638875325204 36.6298807161755  
35.0222940937513  
BZW1 45.7700386532539 45.8966572750941 45.5616307514223 49.8231861631652  
46.0405632631442 45.7300501624017 44.4004151500264 45.6948619492056  
48.6064806408096 41.9219580093938 42.5153507543837 46.0201052072883  
BZW2 608.886783362316 558.451033789799 542.901822331329 213.204385896543  
798.996494242432 465.266372824212 629.301646370726 829.152040996817  
814.991871217268 428.206419080492 464.99944459917 683.099079617304  
C10orf10 242.546821017091 114.161435210562 126.826715174564  
116.852483297949 106.125117937458 250.040637073537 171.853856533964  
134.83544047809 62.9922928277769 82.8275497073451 157.493875535302  
286.611037700479  
C10orf104 103.561100886469 110.666686474986 90.954592973767  
132.52749757795 104.80882886573 193.703214707909 138.436822676252  
83.0497574039035 337.363827785838 175.960838580876 187.689343320587  
203.228211195516  
C10orf107 47.4678477186801 44.9370339275041 36.769073068743  
38.4208429103799 38.8456942580061 37.8102105794655 41.253645578517  
41.9315419791594 44.0519245668737 41.0057887014368 46.4205654140754  
37.1747156131306  
C10orf108 41.9407041937973 41.4508241771315 40.301483914446  
38.0958223740111 36.08956004634 38.3418933808844 38.4005795891396  
42.357910063876 39.0775870687758 42.5664883002833 46.0095710163378  
42.4607795638552  
C10orf109 38.385865183581 36.4002279956519 34.1806289878747  
34.8137085420423 33.4316681623175 37.9951997351435 40.4359177791566  
40.2382908228517 31.5151915411476 37.8217989841918 35.4386677371439  
31.036133494654  
C10orf11 50.9381343674699 104.964345794911 92.0880591999243  
89.2503940049313 80.9160262677505 81.3978207813439 141.261334415286  
105.308648028552 331.474920376907 107.242476674629 87.2316853416374  
95.491982090349  
C10orf110 42.1537476443423 40.148780650831 47.646800205189  
44.4367387274922 40.4639532172338 40.9506062495231 46.3057385979341  
39.5466975353131 46.4164127487052 45.0155543555707 47.6125796208753  
44.2527566343661  
C10orf111 42.6036491382658 41.0678614026819 34.3633615460307  
41.5464765641928 39.5595233162192 42.9695585740813 39.7576136507593

39.6474008369935 46.581796165231 40.1179210534118 37.1059647239814  
42.2577689927563  
C10orf113 36.4564050256915 40.6380495994768 40.4882741869718  
38.8495095797881 40.148780650831 37.9951997351435 38.0598374201407  
41.6466169548846 38.2215591930186 37.7315666632629 41.5421429082231  
38.1421709520616  
C10orf114 41.2424637338424 41.8073910693411 37.8386378737561  
42.9358255168086 46.5557478175976 33.7818132446042 39.2533668167483  
35.5798430594271 50.9010149857308 46.441301934328 47.8988096575648  
42.6758568421347  
C10orf115 39.1590964332473 33.0553208959996 32.3881195727383  
32.554751989205 33.6330903323612 32.4301586830653 30.7315474127249  
33.4534810696886 39.0775870687758 32.2133093774284 31.7413650507468  
32.0636251428594  
C10orf116 85.8694579123452 13230.9863405074 8144.52133665388  
412.162238678684 6673.00322263275 2779.37660132136 7785.77078492993  
5895.03230740197 5932.92478996609 6413.42384145372 6027.02412617194  
4632.08655821299  
C10orf118 41.1523487516364 44.9370339275041 42.4580504587581  
39.1706564265495 44.2607789091176 39.0266821712099 35.1307934330047  
37.1317006162938 34.8552366193358 33.6188027862739 41.0050831223107  
37.9607839934735  
C10orf119 52.5792653122861 60.7495043977707 64.3312319756553  
77.7973642829228 50.0580547772867 51.6053353177789 88.8039637390786  
58.3046521633424 51.6731332961917 73.6240672213673 59.8509516999438  
57.5372732453319  
C10orf12 36.8072833828297 48.8584917918986 44.1452943804044  
46.8954576545929 56.1186281675573 50.8533737532786 65.3694267397114  
53.5271601314404 48.3119523820103 58.115198353247 53.6895401581575  
62.58750768974  
C10orf120 37.9387791625384 36.3110701990588 42.3536549114165  
41.0726336841311 37.0526522140242 33.895835691032 35.2163900400329  
44.5029690493211 34.5633623842083 38.2069499294002 36.0481934423077  
36.5474283500601  
C10orf122 47.8249696958403 43.0227387991135 48.1331309338997  
46.4555908533915 45.6895223823001 50.4022543872993 42.4939802311136  
45.4757965005055 42.9020321355927 39.2623423164488 44.3763859390287  
44.4475838947656  
C10orf125 75.3761360028971 75.9802606133139 54.7855575216687  
113.388372364837 66.0411740221276 64.6835308827804 428.105433953405  
49.7309743973184 77.0703146713865 58.7198210787055 64.5347406608537  
50.8999542937724  
C10orf128 51.9545473262296 43.5182502375207 47.646800205189  
71.5249259772583 43.2484996523549 53.9517841438975 37.2892641289258  
41.5464765641928 39.9444191873552 44.7958122466628 45.9104478407175  
39.3575468494941  
C10orf129 38.6454098044474 39.932537801639 37.2838080935695  
38.5252456306656 38.3085139808968 39.3841861812262 35.5310164682026  
37.2237132058632 39.2497056720346 38.4829727716328 34.266241549578  
36.064718696392  
C10orf132 46.5549623118323 50.3586212130973 42.4580504587581  
43.074472921841 40.0599807618105 38.5252456306656 43.3262148375525  
45.5581356216957 45.2897806651929 36.6893251782922 45.4799270968969  
46.0633179231318

C10orf136 41.5421429082231 70.1238785863433 58.112348043634  
55.4180794172794 52.5645416722441 46.3715909653832 46.9929836306816  
51.8347877274018 44.2607789091176 42.2614524730856 41.7272875295469  
46.8129509799753  
C10orf137 73.6362523983338 106.160416826673 90.1284518302601  
71.5249259772583 106.276392548097 76.4439037944547 95.0190813062982  
60.6706478075023 73.8800799416166 85.7732262204681 86.2118355769367  
78.1623301184313  
C10orf141 69.1306000876802 52.0268699306396 48.8100349749783  
81.588696805606 52.7288095750893 61.4944752562671 65.4784797364469  
61.0831990510269 65.1424206085551 53.6788556779989 52.4393177875001  
60.0517078759277  
C10orf18 42.2455707947223 42.6939394537076 43.9450023643394  
44.265834798964 44.0451487108213 46.4648868771662 44.7255207589606  
43.6434576713809 51.8824384192988 39.0648733099061 49.0361180089431  
45.8546719310325  
C10orf2 46.0920218698606 69.4347592040783 64.0162246399972  
49.7350276169552 98.3126451737573 71.0197205018137 49.8281348927244  
50.1833483241864 59.9770720847728 54.4825201506931 58.8961770381033  
62.3470274683312  
C10orf21 45.1912496459517 41.8848959280916 44.6032218589199  
40.9607305725196 36.08956004634 44.3648993568405 36.634024014558  
39.4710743516517 48.3119523820103 41.9666541498638 40.547835538778  
40.3691324547049  
C10orf25 37.8386378737561 34.3715326040967 34.1806289878747  
36.1562979552173 35.9894133432376 34.7983399096627 37.4772922422734  
32.229154316188 29.7878371181841 37.920964499903 37.9230440150891  
38.745552403895  
C10orf26 149.260740603715 138.12608134713 171.021755568144  
178.858202962948 109.758297200083 179.767874494671 108.558977253184  
72.4834467838798 84.673375308972 94.8742116922003 105.814959179397  
89.4747568145717  
C10orf27 39.266565827316 44.6918600441328 46.5650556481721  
45.1944222548351 44.7829632472754 45.1873487463472 44.8643898647322  
42.8482181313226 43.9450023643394 41.8613406887824 41.4508241771315  
44.4475838947656  
C10orf28 51.1740855632044 57.0082102559228 53.4088637045445  
70.8835636550472 56.8307116636372 67.3469281984384 65.1041577962151  
60.419911425109 70.3613168347492 84.8999904158793 66.4251023257203  
72.5346469941833  
C10orf30 39.9697332660833 42.7775752471711 38.1421709520616  
39.7411455670172 42.7107928951766 36.4986986135769 36.7356360093603  
43.6434576713809 43.3744503319109 41.0057887014368 39.3667161654772  
38.1421709520616  
C10orf31 44.1294459089314 47.3536182445315 43.3085358214154  
41.3027031037343 45.8051846088552 43.2805590023412 41.706879587091  
41.6466169548846 45.8325181856483 42.6793753550854 43.7585538437696  
44.6484005362281  
C10orf32 110.272925554245 235.962209790392 132.679840262941  
199.181938253995 171.205726660714 295.856741468603 171.238235624104  
116.793627324217 97.2425832658887 161.075134901675 175.136856246782  
203.808195515747  
C10orf33 135.889195284785 121.668011907792 170.619111196551  
59.987045425047 59.5844022026141 76.5888466260562 39.1539892144371



59.4674205670657 50.9010149857308 265.860397918913 130.35828139117  
160.283895105835  
C10orf35 286.178856785544 200.002687565519 128.680405667403  
54.8412943008635 278.303493506139 125.642081865992 334.726233105118  
385.827237353675 500.313640131475 172.65049903872 134.567947469561  
188.099292617901  
C10orf37 38.0648056183784 42.6450179841129 41.6977706798234  
38.2599935139101 40.7273974755431 44.2607789091176 44.6032218589199  
43.3838505886856 41.074824727477 45.7911932481722 38.4251036088595  
39.7411455670172  
C10orf39 63.3717459766798 42.8542642792862 44.696023817801  
49.7350276169552 45.3675390992851 56.0477607422828 48.8319884367456  
51.1694248620208 43.9450023643394 52.0999467564713 57.8991270166934  
42.357910063876  
C10orf4 42.2594065417187 41.6825727187466 43.6670755115848  
43.3078542962968 43.2882076149301 43.1244350694755 41.982678229701  
42.4990747926235 43.1260193724086 42.9311657796657 43.5710871617107  
41.9430737035925  
C10orf41 64.2690842803282 58.2571968311834 73.2814174739782  
59.0965219753805 58.7460488758053 54.2503023961401 88.3335649692467  
54.720204938924 141.672695206961 65.2361525412756 59.2106652388061  
47.7962548556026  
C10orf46 47.3791873993182 61.0144918827511 72.0243286940589  
42.8235313007746 88.5564369981649 73.4820932957859 63.5738862549306  
44.1311654985682 57.8772482723463 38.2069499294002 40.6373400186325  
56.4578213622965  
C10orf47 63.1291723738553 59.2643906275025 52.2132783757422  
48.1662933382789 78.4023698691285 46.263826584899 82.0174591986046  
51.8972117537157 81.8491450876942 83.5069968129733 72.2720428359203  
96.2280884890067  
C10orf49 40.8681871019812 45.5842286511645 39.4710743516517  
41.7614975630362 46.3150221024046 40.650742261428 33.7574445386307  
48.272324215504 47.6195009345747 51.2318935933116 36.43924066428  
41.7575097298927  
C10orf51 40.2543341073001 43.8495248991589 37.8386378737561  
43.3078542962968 37.7576900881741 37.9003288112261 34.4570158133896  
37.86982638952 43.7630587657205 39.8873706855774 39.9070785037411  
41.0657892043496  
C10orf53 40.0557788909923 40.213344051206 39.8676052969935  
40.1272810917202 42.5428186846763 42.086839811428 45.9635923776719  
44.5658219748173 40.3536148015242 39.1121819152043 40.7786237231186  
39.2839132447749  
C10orf54 57.7877627794725 121.036604456449 106.243765443714  
457.202737754842 63.0383605052305 134.239606718101 69.9214859673839  
69.4677195088043 145.01315947031 100.413031488199 78.7260936224802  
139.142835448881  
C10orf55 47.5647821785529 46.0713306971594 35.9305494063137  
42.8235313007746 31.8228237796461 42.2577689927563 44.4639405506967  
43.2551508830106 49.2879849674517 39.1621898366355 42.2618615571566  
44.7401523707775  
C10orf57 79.2665546280232 152.972693071526 177.425508756002  
86.9274372004388 165.797721197832 101.177486898065 224.412339736769  
198.54718783437 612.441960343995 167.896094603299 145.64473441957  
126.404988409795

C1orf58 1303.33517942343 2865.25344854768 4482.5285743878  
854.712488657987 1084.23003918768 733.358170858378 1448.17151189672  
1585.90718459092 5074.07305640514 2816.7754199004 2196.59044510709  
2633.34100695103

C1orf59 46.8141313516997 63.0383605052305 51.2796327239617  
59.7044210110693 53.1221282279739 60.3481762331447 52.8496345990125  
57.6913861717513 67.389417016806 61.9459245072385 59.7483827511172  
69.2213838763756

C1orf6 256.766675299448 165.29964739949 320.620320066275  
208.30969642805 164.813928846511 290.81245174957 262.215263489321  
152.920586451578 188.887559923238 493.513764839058 522.377154567257  
260.279110870904

C1orf61 70.6065558064758 90.2721521466478 96.0654949568324  
68.3419511055057 93.4093169676983 90.1080159649841 72.4651758215622  
69.7242825662275 65.0217598379984 78.0133696753253 84.4349803529132  
101.540333720181

C1orf62 38.8561375693335 39.9697332660833 47.2962360458401  
33.4819739460148 41.6806984441849 40.8634043028528 38.4005795891396  
44.1311654985682 43.8482802038826 39.0648733099061 34.9428206949566  
33.2382077236252

C1orf63 41.9407041937973 41.0678614026819 40.3397581924196  
45.7397504535169 44.2120774064277 42.8598805316863 40.6750540874299  
39.3709357615493 43.7078399718247 39.9948390976317 39.153226699662  
46.2625470410195

C1orf64 43.844855336215 47.4076235350059 47.3861758958576  
57.8277957325085 41.7929491793697 44.1737502492846 38.1793598983615  
47.2009420656854 42.4540072551568 44.1379638573455 40.2649309204478  
41.2437378488025

C1orf65 42.2455707947223 43.9421822132391 44.9758339877851  
38.9534635879195 52.4370718282084 35.8227939208521 37.7136011474903  
44.0390019242862 40.137818555383 48.1392888470269 42.0750889188255  
38.4330755397458

C1orf67 42.1537476443423 34.6306468196142 36.4564050256915  
40.1804147506786 42.9090346219023 44.2607789091176 40.5585676679482  
38.079222289614 41.3803269429468 40.3235655331796 39.6403089864678  
35.9604262434141

C1orf68 45.7356815244513 39.6995529770239 36.8730514568925  
45.5869891570251 41.0885562160946 37.9951997351435 42.357910063876  
40.1474543172332 40.9901805728485 44.4652605017595 38.956280281655  
41.0657892043496

C1orf71 36.2496364442264 35.6434124419782 33.553634633839  
38.3166554965434 35.7973685350741 35.6125439901743 40.3302268293707  
35.2642250366721 34.0382693188794 35.93950183586 40.9157352260901  
34.6720534245631

C1orf72 42.8596678196469 43.0227387991135 41.0752399035779  
41.0057887014368 43.7828659616842 42.2006337556379 39.9620349773712  
39.7509165247419 39.8763736543526 40.162771030532 43.6960408897486  
41.5536168238478

C1orf73 45.7356815244513 49.4067286971348 88.4211119834434  
74.7732045170597 47.4548471240051 92.3477214133335 42.4939802311136  
45.8669209716694 43.0930293831497 72.2443746456494 79.0940380276977  
64.2769859135548

C1orf76 83.946822476147 102.863599315528 102.228965899392  
99.8063480813138 82.4615433148846 88.6287852712744 108.558977253184

75.7947206223934 94.8408264309872 154.707548614663 112.957927208627  
100.623973215137  
C10orf78 62.5036823572932 78.4289643729837 77.9085946827079  
76.2591822114739 74.4623288220969 97.4062608315831 76.6094442444074  
72.5835488194631 74.1031848443392 53.6429962450784 61.940656536312  
70.3309641302984  
C10orf79 38.7537364570873 39.8695929627783 38.9790184198145  
40.646702696033 38.0598374201407 40.5281496800812 44.8643898647322  
36.5393857306744 36.6312676076142 42.5664883002833 44.1148826235374  
38.2350720635382  
C10orf81 51.9545473262296 41.2598458726002 50.1860191642359  
38.2041059863839 41.1868052124344 43.9724628401189 81.7434024567356  
89.3868257841517 58.4891791448514 42.2614524730856 44.9713479185144  
44.9070250604284  
C10orf82 37.0320432433314 34.5023764006976 42.3536549114165  
33.4240466670776 36.6354013629791 42.8598805316863 37.3799542961839  
43.6434576713809 38.1169703906207 34.2638875325204 41.5421429082231  
40.5703581862752  
C10orf84 48.4849194706125 52.5868047927666 45.5883690965192  
61.2213001749372 41.1868052124344 66.0069448981947 56.2181240696479  
45.0972184964705 51.2066664465185 51.4454142248566 57.9864701726379  
51.6660481331154  
C10orf85 70.8288090024328 41.8073910693411 42.4580504587581  
39.5050383901884 45.9104478407175 38.9378717994178 46.4388841354122  
46.8954576545929 42.0621425894624 42.8936990772838 45.9104478407175  
45.2783024981315  
C10orf88 45.5758521267508 49.2050538150106 47.7737810047679  
39.2780515621926 49.8304479381623 40.9506062495231 37.6036146841933  
56.2441895183416 45.6582729799009 51.6778366958973 56.233217375698  
50.8442982601142  
C10orf90 35.9305494063137 37.920964499903 40.8420925848403  
40.3180310664156 40.9950639693255 43.3785777889265 38.2933870238743  
43.2551508830106 38.2215591930186 37.920964499903 41.3553369544097  
42.0424641526302  
C10orf91 42.2455707947223 45.4143854024453 41.785676764591  
44.550322123994 41.6806984441849 41.7256940298128 48.3411413510851  
46.4672637826582 43.8482802038826 42.9866214102525 42.2618615571566  
43.6434576713809  
C10orf92 43.1805016690297 39.6995529770239 42.0621425894624  
57.0629653735694 44.4489662507893 51.0506441018166 45.223075311113  
42.9301944191913 41.1742244762318 39.9948390976317 45.8180710486329  
42.0424641526302  
C10orf93 40.604930211629 37.6678021168009 35.4089520062205  
37.9315270017242 37.6527901109005 37.7441423440745 40.2669497398702  
39.1652965788406 38.1548766517774 39.6333888530279 38.932557955217  
40.7063426028871  
C10orf95 44.5282181324797 51.7495306734657 37.1643693306382  
39.3750969348308 42.7982502551634 45.3882138838137 60.9648845690177  
47.8947595316832 43.9450023643394 47.9056710878325 41.0808257270221  
41.7575097298927  
C10orf96 39.9697332660833 37.7384958256497 40.7620472083159  
38.745552403895 36.6354013629791 39.2248354955045 43.3262148375525  
41.1575777497576 36.197424053556 38.3092241935352 40.4504608195666  
38.6454098044474

C10orf97 211.926421068313 126.389908470189 134.725028732282  
125.801834682035 94.1575209300592 168.91210897306 105.549249728506  
121.510087314197 123.25443049561 184.269633116351 162.993316022946  
180.255771684507

C10orf99 39.4710743516517 917.631567606105 1395.33665255999  
43.4410741327254 77.0301627655229 59.0686629877982 140.961217055867  
88.9038123445083 269.546586017659 443.581460031166 416.844848063269  
352.292837622545

C11orf1 102.25509551881 167.319747725488 207.632489510045  
122.952515297686 159.288478050818 137.976238593619 142.389246750828  
102.24202987437 129.320408155239 130.533514998688 129.965747812294  
195.430996540859

C11orf10 1379.51119430451 1046.42391243532 766.027617496754  
1199.29782389306 1607.73526966988 894.486674059951 1270.49749036491  
1357.41745370754 1440.41726370246 919.542051089664 843.078502001733  
1582.45600339543

C11orf16 46.9939712192224 40.2493681589104 42.4580504587581  
40.646702696033 39.1650142708257 41.8613406887824 43.4544762830742  
38.745552403895 42.992884918158 42.0621425894624 44.9713479185144  
42.2577689927563

C11orf17 123.963659641243 145.073599404007 147.602298697211  
98.0473811574767 102.597012252626 112.306016029829 107.576033955049  
91.7969435808283 152.545682001987 114.674541610026 138.12608134713  
139.614715580418

C11orf2 468.573956652904 731.670315613547 878.863554510943  
632.577797921655 950.740991182127 1048.98028527123 1081.97502255142  
802.650020720921 490.652353306749 1135.43644148537 1167.25317435052  
676.672146226382

C11orf24 152.294357984689 80.882176929636 86.2895084312264  
164.176142753482 102.597012252626 96.2490896573253 92.6545309624315  
103.945335792682 87.3815040456105 94.7110944331075 90.1284518302601  
75.6428949408034

C11orf30 43.5710871617107 39.6123051184545 42.157627240486  
42.1273928203021 46.0977687311222 47.5733603903505 52.8496345990125  
49.7309743973184 37.7384958256497 37.920964499903 48.4717951775049  
45.2783024981315

C11orf31 51.5888395924843 60.0601788842942 47.4740726032707  
61.3747706295648 67.6011992144113 55.8243694410835 72.1401612718245  
48.5681478665796 59.5093038629766 69.5080454202415 61.5392012551041  
53.4735821194294

C11orf34 44.7599897211788 42.1607322031054 39.6833800000587  
41.0219290963778 44.0977148249302 45.4882438975269 47.3661873039785  
41.4812544772644 39.9777866059804 40.4136535208406 42.170702295259  
40.6614700944853

C11orf35 51.0225132036905 63.1780854659428 77.9085946827079  
53.0284011078097 49.8304479381623 44.5544727111028 43.9450023643394  
57.7805922926828 72.7934987008399 80.5388767883646 60.9446532180211  
54.1941919612524

C11orf36 36.1232327599945 38.4330755397458 33.4240466670776  
42.4580504587581 36.9702228618069 39.4953494583071 39.3585350448719  
38.079222289614 42.1594905198929 39.9948390976317 35.6041926503637  
41.2437378488025

C11orf37 41.0608773166058 37.1685072112618 33.7737772393677  
37.29566077996 40.5710637884029 40.1428591998404 38.6243997507646

43.6434576713809 38.4344387289956 42.2614524730856 41.6336636285875  
38.4330755397458  
C11orf38 55.2515150764173 61.4242242807301 55.5005760719069  
37.4223289687135 51.1915474019836 51.334128582289 61.141483572676  
67.1702819938085 53.6837370963602 65.2361525412756 66.6118713143653  
64.4156641487994  
C11orf39 40.5654775358427 40.148780650831 41.9666541498638  
44.1483976313959 45.5809132232681 36.6271061451613 37.0564573649223  
41.2551966132486 45.1899271235974 39.2623423164488 38.1835938174625  
41.2437378488025  
C11orf40 43.844855336215 31.6295801599123 38.9790184198145  
39.066284740632 37.6527901109005 36.8059561571675 36.5352572191451  
41.7419877611072 37.9273653326866 39.9948390976317 39.4410515050885  
36.449101775775  
C11orf41 53.0290605707162 44.3529919625344 59.2012779686869  
46.3203995372658 51.0785933435539 44.3187284857534 63.0842071602791  
49.6629259325705 68.8353800542132 58.3285450269055 47.3791873993182  
64.6996384732208  
C11orf42 42.442231667357 37.7384958256497 46.5650556481721  
37.5382094267692 39.9697332660833 39.7394181011603 41.9393838138203  
44.797320243931 41.4636047919453 34.4875013487777 35.2339574411711  
41.863927676552  
C11orf44 41.3387790895716 43.5873188565519 38.8775560911841  
42.1273928203021 40.0599807618105 37.0180934800573 41.4742337714895  
39.2672712041774 45.8325181856483 41.3321861371202 38.079222289614  
40.9683275553869  
C11orf45 53.8856501960117 43.0971787292711 53.4088637045445  
58.5406981871153 54.3116862772198 52.8421046802739 62.5506324864207  
61.7572675712557 54.2825877218965 54.4825201506931 49.7363778831003  
54.1941919612524  
C11orf46 62.6702927225656 87.9963662401769 83.0262409967927  
113.979504140326 67.4534389579576 156.445000453282 61.2183034191703  
57.7805922926828 68.0295963383707 63.6197695952215 82.7309298534989  
114.142157259903  
C11orf47 41.5421429082231 45.9732108120834 44.2733573199954  
43.1847628331565 50.0580547772867 44.8872784170036 41.9918605927928  
40.6663433492193 43.423558862426 46.6598879466655 44.4329005595031  
45.3763275588341  
C11orf48 214.245832611737 274.731304343034 257.761541860837  
218.917221711155 424.87896140215 196.592478823849 433.447319956981  
313.46376203503 277.069127740648 154.149426842591 160.360785581153  
257.584248252408  
C11orf49 49.5810174435089 87.4273245333478 65.9476039189301  
47.2740099216972 53.6210959113222 54.7806868394478 63.0842071602791  
51.3851157261451 76.1205714556592 52.6879797806876 56.1097418153893  
56.8534370691413  
C11orf51 58.7404123614695 72.5397346298724 80.0183739952818  
81.382229980722 74.8013460023603 109.137372445043 85.5027511448958  
78.1448136847078 104.80882886573 85.6763929745253 86.6798536307388  
78.8968326770219  
C11orf52 70.083473392272 57.0082102559228 87.8724689898823  
52.1201052574162 60.1730663840476 43.0860383229288 79.3861418060845  
63.4570909617664 77.5480089703916 82.8275497073451 91.3723635213821  
90.3485862002091

C11orf53 39.3709357615493 40.148780650831 44.3344900481112  
46.4555908533915 43.844855336215 43.4681646416585 48.0283573444179  
49.7309743973184 51.8824384192988 45.6868589181768 45.2265319826548  
43.7672102682067

C11orf54 115.622641633992 163.067962559455 154.752920877816  
135.138667957956 124.841811761412 157.9970294734 123.336184278054  
80.0213594533301 89.6736229308069 131.779333469955 138.748233664345  
169.723009455614

C11orf55 45.2875173643252 35.7393138893354 42.5864346233886  
43.4812166409346 43.004943518025 40.209110303983 41.5464765641928  
42.9887069977696 36.0741672064298 38.957687788868 42.6366765186182  
42.2577689927563

C11orf57 70.5096706089299 67.7189686993694 54.6051538001037  
71.9062462001972 68.0414563597154 66.295597720304 65.3694267397114  
66.4207938873541 63.1944558106132 62.6984594468418 60.0765286625112  
64.2769859135548

C11orf58 45.6517320730042 42.4493032770053 46.5650556481721  
39.066284740632 41.467005949568 35.6125439901743 54.339958888486  
42.2577689927563 51.2776048338 38.4187686307607 42.6366765186182  
47.6938628797168

C11orf59 458.47341225284 659.666977039793 549.117045813593  
682.227514643175 546.287195443189 575.268446033282 757.257495810249  
358.194667053419 763.947361966861 516.076634990003 418.810270137243  
393.944898808828

C11orf60 64.1882546112044 75.2824161164996 101.804757613639  
58.1798515131249 91.1057573288203 128.776189744323 107.895235897156  
78.4815128101967 111.397578350396 111.607814098243 88.0877175295544  
106.356074933606

C11orf61 59.987045425047 58.6249721386149 68.6095266659765  
54.4586176399381 72.768998788927 60.9822577063534 56.393737074538  
56.1404433602127 58.3564461855595 60.7495043977707 60.5803031036931  
66.53831442217

C11orf63 65.2427283850219 52.1379596312084 54.182676064099  
65.6165636276827 54.182676064099 47.7556758818053 67.6011992144113  
89.0275988550016 60.0070278969795 80.6966079421763 67.4760456862775  
67.8774399765179

C11orf65 41.5421429082231 43.683792219729 37.0642268327439  
54.8412943008635 40.148780650831 42.750861693377 39.1539892144371  
45.642304356051 42.1594905198929 40.6022003765153 41.7272875295469  
45.1735152121056

C11orf66 43.0001432913058 47.6229101519945 43.1931731665131  
44.265834798964 46.4343327861696 47.8636003588181 42.629412460409  
45.0972184964705 37.7384958256497 46.441301934328 49.532546810992  
42.9887069977696

C11orf67 160.442808769594 65.8082111065882 93.1349769600388  
83.014860007187 95.9075629352341 253.333114749013 163.995560004001  
167.746168796779 110.983311402531 178.379117285008 147.151416108234  
246.965844426351

C11orf68 93.1759373099875 52.8796369426118 57.1226931773006  
64.2130157241811 53.8260140375214 77.0226403968683 66.5422130374814  
72.121833189378 74.0614295574729 96.0236731791095 111.97030382494  
68.9885481504003

C11orf70 43.844855336215 42.9358255168086 108.12482131423  
49.5424425850549 95.3754438202863 80.6550905475507 93.8009890556664

87.0116305167987 92.6608453151206 58.7460488758053 56.6086202928268  
71.2963721541702  
C11orf71 66.2154717217675 59.3406363431414 54.1637401903523  
51.0175677516029 94.8408264309872 67.3469281984384 71.5249259772583  
51.4360013601805 54.4912806027381 52.3304586399695 52.7817052791259  
51.8562635270111  
C11orf72 43.5710871617107 44.3529919625344 42.9104454767916  
41.5464765641928 40.6723334103791 37.9003288112261 42.4939802311136  
41.4508241771315 41.863927676552 44.2580151149956 36.5359455830388  
41.2437378488025  
C11orf73 75.7342400123505 67.1108025189303 77.4246856935596  
84.7275805640731 93.1238695478498 101.789162379972 74.466989900636  
53.7378346199838 79.7061415085215 54.6089451252049 60.8201366212589  
91.3723635213821  
C11orf74 106.521012342668 104.492750153479 105.052418151358  
134.394743648475 145.439350995461 262.624624672404 134.407474121421  
175.41042153356 147.269661124015 171.043935516593 132.760054781304  
186.866378606003  
C11orf75 172.102568448455 79.7061415085215 62.3936376596431  
161.48562926756 69.6330393135101 77.7481370715949 268.144525192544  
49.2901038327894 92.9388175558241 53.5498255316009 63.7598547294225  
92.3388129097482  
C11orf76 35.8772145077273 34.8942481719111 37.7384958256497  
37.4642807402741 38.0089018744739 35.9851865044027 36.3604951341921  
39.3709357615493 36.0741672064298 40.7063426028871 35.6331082899192  
35.8429598823818  
C11orf77 52.5792653122861 54.113533179847 59.3549213146532  
56.0794100106654 56.4685270445642 58.0095518210499 49.6872467499977  
48.3590401011623 58.3564461855595 53.5498255316009 56.6884575165011  
57.8111054584154  
C11orf80 116.9812483023 86.4898752526885 115.256208610595  
137.095435683619 58.5450868286167 62.1857038870283 238.697159169213  
159.884578124679 103.139459009593 122.024487499513 91.5541137821803  
79.3875629814087  
C11orf82 83.0534943004588 109.943883439481 69.24946602508  
63.3006977162657 221.325534445978 56.6172748471831 146.117756310709  
150.829277770546 127.863441809606 43.7303813515864 45.2265319826548  
53.0446815750355  
C11orf84 41.0608773166058 35.5310164682026 36.3604951341921  
39.7411455670172 40.3452320167286 35.8227939208521 36.3194282084339  
34.1806289878747 38.3418933808844 41.7405682794166 41.7272875295469  
39.9519547348106  
C11orf85 40.2543341073001 42.9887069977696 39.6451483836089  
46.6849259108754 37.10170285405 41.554942319225 44.9094465483072  
39.3709357615493 41.6340461942423 44.7958122466628 39.1878770155069  
40.6273137602368  
C11orf87 45.0985088502363 43.2649781354792 37.0642268327439  
42.6913548400127 40.8873907150245 41.7627910693483 45.3597029614942  
43.3262148375525 40.4997186069494 45.2556760873335 47.4630625313159  
41.3481355128089  
C11orf88 35.2267149016596 36.5219488315447 36.769073068743  
38.8495095797881 39.7568367479301 36.8059561571675 43.4544762830742  
35.9023742468744 41.6616444147804 35.3849221682845 38.1835938174625  
43.0930293831497

C11orf9 44.7044140979108 47.087835967892 40.1985790927248  
38.0958223740111 46.8674366115656 38.6414316877471 42.9803717121865  
44.1311654985682 76.7100878053735 39.3698811593364 35.9563099719284  
39.6352613956998

C12orf10 256.892326800908 292.99497881914 321.31271583925  
252.097980496533 296.664472126617 371.393488010768 370.027120412227  
412.694325761831 477.741319532507 345.443895623911 350.584135047249  
320.555790243104

C12orf11 73.4611178120841 67.9259304928255 72.1154333023225  
71.9062462001972 93.0410625954471 73.2144205844199 63.5738862549306  
53.1052228246467 101.036327583799 57.2813205536176 60.5125774827425  
71.2491135258076

C12orf12 45.8108990837624 31.3542159583213 39.3709357615493  
33.4240466670776 41.5668884168669 35.2067831864574 42.357910063876  
47.8947595316832 39.853866204927 42.3606390470387 43.7585538437696  
38.1421709520616

C12orf23 59.220967994972 54.1773909134233 45.7968648044613  
53.593974682612 50.5110359971301 59.9876575158981 53.4921736109774  
61.9787117490846 54.2825877218965 63.1091746640396 54.1963147679251  
60.4872675915085

C12orf24 59.046385957117 43.7644428186265 48.7039705048129  
50.5310598656998 177.620987812591 104.80882886573 72.5956443098684  
43.1567024035183 47.1744296124496 49.3000844711116 52.4393177875001  
54.9919060580109

C12orf26 80.8285585008048 93.0251525517037 137.696331574552  
116.852483297949 86.1633564934019 125.81889994067 94.4618437533343  
65.0656365694468 135.19133529995 164.176142753482 146.840603547323  
114.935101645207

C12orf28 44.1294459089314 43.8495248991589 44.3344900481112  
43.3078542962968 44.6834648302383 42.9695585740813 42.9803717121865  
45.0972184964705 52.3579564953125 47.9056710878325 48.4717951775049  
44.6484005362281

C12orf29 72.613397507717 104.824641162138 70.0955779023465  
83.6935756500468 82.6157566292355 145.170590045628 106.140215438654  
56.6910078150745 97.1271615802556 104.763913120468 98.5609311953771  
119.512426152446

C12orf30 69.8899273527731 71.6537776654915 70.0567634568557  
59.0262390168156 118.251739134889 63.0205913130827 80.1461294346211  
54.2877981508636 87.1819433915847 71.8314470868658 78.7260936224802  
67.363348155206

C12orf31 122.0305509548 145.391705645319 96.213791081731  
103.961956810572 163.809567262808 148.144200968432 165.411942074375  
77.8946473414547 194.046072415847 86.0832675838966 91.036114822363  
129.268600210689

C12orf32 97.8141040140486 167.05554959607 146.087016079575  
117.539037885384 112.506613718654 83.0554837248934 214.073500272341  
168.366869831376 342.300139006451 119.015431849218 111.186223357396  
124.998771394658

C12orf34 57.0006212637829 48.9259041798949 42.0621425894624  
41.8778873678551 41.6806984441849 41.0582900711341 48.3411413510851  
47.5950227477807 54.1745577382276 42.785429206422 41.9908237694988  
42.357910063876

C12orf35 76.4439037944547 80.6083247572711 65.9098543816057  
177.27613997459 71.5345397102823 86.3185927557402 78.9900928241723



59.2720151666582 70.6311537856734 59.9876575158981 59.7044210110693  
65.564930068976  
C12orf36 178.881586334601 45.5842286511645 41.6977706798234  
44.265834798964 48.9627346956003 38.9378717994178 43.5627649099623  
49.085741080241 54.8946088631931 38.4187686307607 46.3370338074996  
37.0953622406687  
C12orf37 41.7397731376692 45.0115870036541 39.0775870687758  
42.1273928203021 48.2748123114598 47.8636003588181 44.8643898647322  
47.3791873993182 52.3579564953125 43.2988017098387 39.8184668132023  
46.7182294568603  
C12orf39 40.2543341073001 36.9994058279362 40.4070046183108  
37.7469621225553 45.6895223823001 43.7630587657205 39.8695929627783  
44.5029690493211 38.4344387289956 39.9948390976317 45.9104478407175  
36.5474283500601  
C12orf4 78.5216977073842 78.9203273221608 68.4720753153522  
125.801834682035 86.033725825968 100.650129064849 84.0691608193405  
58.8022152133979 86.5616422570166 66.7299966077909 62.105802634526  
74.6734358603424  
C12orf40 38.6454098044474 39.8369676404424 37.8386378737561  
37.4585919849752 38.5185220021014 39.9871741554388 35.6561235063937  
39.8048943625718 39.0775870687758 40.2669497398702 42.4956274276424  
42.0424641526302  
C12orf41 373.714692628967 238.205365476671 242.751164798133  
250.504350952583 320.889609846069 291.486402879057 342.475405815033  
414.539381761279 436.757445186987 357.182869779274 294.567137562864  
251.374750265492  
C12orf42 38.957687788868 35.3307157989724 33.0260566875355  
36.6501141438378 32.2133093774284 33.0463640202858 33.9750800030909  
34.4896350146096 39.5806465938526 33.8984830800739 31.6063174764616  
31.372171135652  
C12orf43 79.953657052127 68.456297913777 75.7464604972652  
63.25187762908 71.6537776654915 87.1735705257803 82.1144251872199  
69.1973371867031 112.900479809091 84.2434917159728 98.4699679900651  
87.8967913380047  
C12orf44 919.542051089664 310.461601607662 323.453481668415  
430.450581874766 322.440680131096 330.241189572237 501.817654561915  
762.855719373733 611.538630852232 327.455030020799 344.985739524681  
288.065258507995  
C12orf45 94.1967497986791 95.1423940686828 134.537040608687  
127.225812893692 118.748969134194 99.7445419301229 118.089250727398  
116.547937420457 148.844652125095 78.1683130800805 71.8314470868658  
105.382126899524  
C12orf47 341.302185430613 261.023196824723 248.861100647206  
194.395766807005 472.159979716705 258.30549459038 286.927016665685  
269.963186760811 339.52415679299 313.233036704221 288.508774004052  
326.902009704746  
C12orf48 52.8427643366617 76.2876332597671 59.1533197797534  
61.3149617644002 92.5135737873857 55.540888910486 74.7534423194688  
69.0819394834919 90.1430468048409 42.8936990772838 41.6336636285875  
46.9867599298218  
C12orf49 74.6776631832355 91.4990733687068 68.8098607236981  
80.7168944828052 75.3580625318157 55.3202238943712 65.3694267397114  
54.1731035633439 81.2850357499192 55.9283039581662 59.0537479001842  
55.4635297192076

C12orf5 78.5216977073842 75.2101993995344 98.9657264176664  
106.20479137406 86.5513342734384 70.380703483689 61.0979269700412  
74.2517888452553 67.3230935444252 43.844855336215 61.6084234634424  
81.0169370911764

C12orf50 43.0462952354436 41.4508241771315 36.4564050256915  
38.7879667686732 40.4166536885831 45.1873487463472 40.3302268293707  
39.4322247076926 36.1457789072601 39.8873706855774 37.8372168909583  
38.8834538955

C12orf52 291.5513298383 136.736085245679 109.374838860558  
101.403739410832 337.156068385541 124.112216491975 163.20801480093  
119.088986733238 174.443102016472 145.28255999556 117.586275152761  
94.1128427766432

C12orf53 40.8681871019812 39.8695929627783 38.4043916290561  
43.8002456102021 41.7929491793697 40.5281496800812 45.4799270968969  
41.5464765641928 37.8319142847141 39.6719190054379 41.6336636285875  
43.2776458914333

C12orf54 40.7609952437622 48.8584917918986 46.0727230219512  
35.8472302065546 39.9697332660833 42.5660695551615 44.4639405506967  
43.4544762830742 42.9020321355927 59.9354531144375 43.4709415392696  
42.0424641526302

C12orf56 51.7607563002005 80.6083247572711 44.696023817801  
41.7614975630362 94.5055588176321 41.2567470068038 112.436153468759  
73.0394191668858 128.436305192918 44.1379638573455 45.7328341667151  
43.3744503319109

C12orf57 942.247437385029 986.40790007743 695.255317861845  
852.291461317697 635.050535522135 1975.28674300761 1111.89793143647  
884.036280777358 1260.45604038487 1296.28036613191 1305.35453202355  
1261.18520360134

C12orf59 44.7044140979108 36.89524015739 46.6588655218735  
56.0794100106654 38.8456942580061 41.9543948167375 43.0930293831497  
44.4031868028216 45.6582729799009 41.6373771565199 38.3684202018524  
43.8575940017119

C12orf60 46.3884811643547 43.0971787292711 43.3085358214154  
39.7411455670172 42.7107928951766 39.066284740632 42.9191764437547  
46.1159021593282 49.2248095024373 37.7598032934773 42.5426057453993  
46.3411353377615

C12orf61 44.6231541342 43.3458769998118 41.6079958749402  
46.7577982595088 42.6022652963326 43.4681646416585 34.3633615460307  
44.2159020605784 43.6670755115848 43.6033221838149 46.0905079010237  
39.8497227447888

C12orf62 204.344278991396 130.524308471577 118.467231612638  
161.25239489071 114.674541610026 224.914980996667 235.514830602053  
259.127235335036 274.259417498569 164.462951076718 169.970634268117  
179.186381381821

C12orf64 41.3785995857154 41.2598458726002 40.4418875035651  
41.8161064926185 43.844855336215 41.0582900711341 41.5464765641928  
41.8417024632349 41.5358173001885 40.4518431978241 38.738305958734  
42.357910063876

C12orf65 67.3816715975056 48.5905518770847 50.0748292497578  
58.5406981871153 67.9032387662129 77.1317865202676 71.6890300780549  
58.4200819624972 72.3095457386378 72.1090339831747 58.8961770381033  
60.2550788540864

C12orf66 53.8856501960117 44.6918600441328 48.3847843498476  
44.265834798964 46.6397391251762 44.3648993568405 56.2181240696479

47.9942520395434 65.4784797364469 49.8393069675192 55.6151308605445  
53.9431600945419  
C12orf67 39.6609238036815 44.1239711172417 41.2365089689635  
51.0175677516029 42.0709558258414 38.1169703906207 44.0687697278114  
47.2864663693787 43.3744503319109 42.4594149893798 42.5426057453993  
41.6550823405646  
C12orf69 39.8662795144616 38.6414316877471 42.5406888281114  
40.7481155008596 38.3561682218911 32.2133093774284 37.7136011474903  
37.7612949798895 37.3600014814388 39.9948390976317 40.2649309204478  
40.4639532172338  
C12orf71 44.3355304829989 41.8073910693411 47.4740726032707  
45.1944222548351 45.3675390992851 42.9695585740813 49.1067959632109  
40.4359177791566 44.8997235283254 40.7063426028871 42.4580504587581  
42.2577689927563  
C12orf72 41.1523487516364 35.6434124419782 31.9895827886879  
39.5050383901884 33.2021437980841 42.0574848021044 40.9157352260901  
41.1575777497576 40.6957787921451 35.2880714952489 39.2542963855807  
34.5633623842083  
C12orf8 33.8558232866797 35.2143190355414 32.2133093774284  
35.1451084093692 37.2567512265363 34.4896350146096 35.0305278582179  
37.86982638952 37.4540772310118 34.7308008643142 38.745552403895  
38.6454098044474  
C13orf1 65.4561038762234 78.0522475574761 88.4897895318663  
58.9168466928565 63.8315840603904 66.7278011183421 48.1747307200218  
53.6210959113222 58.0722340887264 71.7464249053513 76.0420039542595  
86.7710020879725  
C13orf15 966.803172864162 892.323580265478 1103.90449800536  
2280.42953098693 475.881757842864 1455.64106630257 328.962069934895  
781.923984640049 214.537530518962 361.158558609751 370.64147085217  
570.824732318332  
C13orf16 52.0299937917925 43.5873188565519 41.6977706798234  
49.3654837541353 43.844855336215 45.0882356578404 44.4639405506967  
45.642304356051 46.6944238390932 46.7646877499666 39.9070785037411  
46.5650556481721  
C13orf18 78.1313732870053 46.2677540712845 45.989212296035  
139.679585117348 42.551356054931 54.2978574294868 75.0092868910417  
45.5581356216957 41.0476065156912 43.1839109702714 40.2649309204478  
42.7782216342806  
C13orf23 163.360824752796 162.160380044249 103.104022477607  
87.114638423256 132.473918053428 82.6709662235238 160.459991480576  
105.111902911639 133.720493104769 93.6787442149817 85.6170780640867  
101.540333720181  
C13orf25 49.8472708021525 54.1773909134233 47.3861758958576  
45.8844325913247 59.8102324370568 48.260931742163 58.6431245059655  
56.6910078150745 51.5229124652769 45.3530683538086 44.8872784170036  
44.5432192783161  
C13orf26 38.385865183581 43.4396866157171 38.0057289062111  
41.8778873678551 38.2496050953547 37.1317006162938 36.4098694708483  
42.3110002461296 44.5678064264717 40.9558083259517 41.6657053704762  
41.6550823405646  
C13orf27 551.915864019927 586.735744054398 754.903348372161  
786.57695312967 637.694633519528 689.738256133922 575.057786209737  
810.382224368065 553.328261478032 720.183703120662 606.123659335794  
750.151825182993

C13orf28 40.4639532172338 40.2493681589104 34.9849896310235  
37.7469621225553 32.771863438151 39.3841861812262 41.8315602975157  
38.4540849632254 39.5806465938526 37.920964499903 40.0766543123257  
39.8497227447888

C13orf3 41.3387790895716 46.8954576545929 41.8751578329365  
41.7614975630362 54.802736966312 44.3648993568405 58.0139597055449  
55.8087097725119 60.4837400912239 38.1042454705119 45.9104478407175  
35.1451084093692

C13orf30 39.266565827316 36.2103905554984 36.769073068743  
35.0448343468967 35.0181575202066 36.6996187567892 38.0598374201407  
36.9355798143571 46.8873421271259 40.5090849993014 34.8383995317036  
38.4330755397458

C13orf31 42.1537476443423 41.4508241771315 34.1806289878747  
43.3078542962968 33.6330903323612 38.9378717994178 37.4772922422734  
42.4580504587581 35.9645119596869 32.9981302187884 40.0766543123257  
47.5025821041537

C13orf33 56.921728372453 43.2649781354792 51.6159542017038  
89.4504034432321 57.6791750431251 244.089971761037 40.5585676679482  
60.2691630545162 44.5303781239209 62.8201270538435 52.022479439889  
93.523394623588

C13orf34 105.914573205761 97.712117589297 82.2266112813039  
84.6435656850129 115.827601697699 61.2387559102636 98.5663841503803  
83.2873728545705 124.56803502087 52.3304586399695 52.7817052791259  
68.3234331335073

C13orf35 40.5654775358427 42.7775752471711 44.2405728317107  
45.7397504535169 46.5557478175976 37.1317006162938 39.3585350448719  
43.6434576713809 44.7058233759912 41.4397539024976 45.6348103033479  
43.6753843488695

C13orf39 38.385865183581 39.9697332660833 37.2838080935695  
50.0526763693329 37.6527901109005 41.2567470068038 38.8417151851134  
35.5798430594271 38.6322728994674 37.1275334308172 36.0481934423077  
35.7451401627836

C13orf7 63.6767189846426 52.9603588177082 54.9071823326024  
57.8277957325085 55.8173045043348 69.8832723783498 56.9320717885002  
46.4672637826582 62.6386437936516 70.5704019848974 63.9617548533553  
57.290967307936

C14orf1 35.5179217192467 43.9421822132391 37.1643693306382  
38.2041059863839 40.3452320167286 51.3886035574416 37.3799542961839  
37.33030683349 37.0126425326534 37.4302011516587 43.4709415392696  
40.0557788909923

C14orf100 138.82907142482 193.196385709124 213.232693288132  
164.435300801872 122.160438114932 110.088243267424 97.299696284253  
110.440072569721 145.492831993859 140.063595285844 133.893108529325  
205.314410185216

C14orf101 49.6241203903354 52.7493349111555 52.7005092555102  
43.1847628331565 54.802736966312 51.294537308199 42.1607322031054  
47.0940613507321 49.9951674107458 45.2556760873335 46.7386599624801  
55.7067742610401

C14orf102 142.69744253318 97.2535496140648 129.414877519657  
171.920449949522 102.49785018292 140.128033028434 153.081027338185  
94.8717345601966 133.41667178516 271.275703732022 323.957165066178  
172.252848888699

C14orf104 71.1521292570086 75.0873720488265 61.356483470053  
46.8954576545929 78.6286416672119 62.6839349907803 75.164719839017

62.105802634526 90.2790229242453 65.5349012839562 56.0477607422828  
73.3321469094819  
C14orf105 41.7397731376692 44.1239711172417 46.7058093820839  
45.8844325913247 42.269054475455 37.8102105794655 46.8613212048981  
50.7364620410977 41.9635525160083 42.785429206422 42.0750889188255  
46.4952206446229  
C14orf106 121.542387231625 211.109957714241 120.123385036416  
245.439289067575 122.160438114932 122.284299477218 172.015856827154  
153.462055740758 206.031918669687 170.804822846738 126.920579478593  
143.031555728753  
C14orf108 101.560929859785 113.351710503778 100.708709225818  
104.784718169822 86.6854406823303 96.2490896573253 77.5813459454823  
95.2915739972533 148.887819162926 91.3418781023824 89.3456573431171  
118.115557136662  
C14orf11 39.4710743516517 37.8217989841918 42.4580504587581  
45.5869891570251 37.4470183315826 42.157627240486 40.1235656101329  
40.2382908228517 37.5469247328848 40.7063426028871 40.3452320167286  
38.8495095797881  
C14orf112 362.03448469738 306.746364062777 296.271895016431  
343.139450863356 319.092568066532 279.001128345613 285.901316389161  
428.307428028806 385.064309855006 328.788681417522 239.350719871688  
419.271533050938  
C14orf115 40.3478825593224 30.6802399384205 39.0775870687758  
38.2041059863839 48.2748123114598 39.3841861812262 44.0687697278114  
39.1652965788406 42.4540072551568 41.2276963324981 40.8225507267584  
36.7762265039864  
C14orf118 48.8333989709933 48.6795178347248 47.5673419710251  
51.1313686723929 51.6433699009012 45.4882438975269 50.5252048155459  
49.3217779272599 55.540888910486 42.8936990772838 46.8954576545929  
48.4849194706125  
C14orf119 43.4626049853157 33.5924201549249 40.0998167098057  
34.7266486944713 38.3561682218911 36.2015763253919 35.3362091871364  
42.5435283762933 39.7537274655115 39.3698811593364 46.3370338074996  
47.8931773060789  
C14orf121 47.5647821785529 46.8954576545929 41.9666541498638  
57.8277957325085 54.4586176399381 52.7156971154405 52.7002314230604  
48.4670130605028 44.3440839686558 52.7972156492746 45.390192977585  
45.5800840647989  
C14orf124 53.8856501960117 57.8876850634922 62.1893884200745  
49.1786207920603 60.7495043977707 57.8944021095265 61.6544855697851  
47.3791873993182 64.1267046511632 54.3554233228353 54.4140381300469  
66.9239565096247  
C14orf125 44.5282181324797 43.2649781354792 44.4311655729487  
46.3203995372658 37.6527901109005 39.4953494583071 40.7910160811527  
38.6454098044474 38.9006788676407 39.6719190054379 37.9230440150891  
43.4709415392696  
C14orf126 57.8765910878975 84.0691608193405 52.5353664902258  
58.3475983630509 66.6118713143653 68.9562915755919 53.4921736109774  
48.5681478665796 71.0211264570699 40.8970401536578 51.1483696410762  
51.4968903591058  
C14orf128 42.6036491382658 40.6380495994768 38.7745734037492  
40.1804147506786 37.956732373465 39.0266821712099 40.9157352260901  
39.853866204927 44.3440839686558 38.0078357808393 43.0016969050339  
42.2577689927563

C14orf129 157.109085253328 95.7125018118399 140.369714831352  
147.010700944686 94.9104200955155 122.904323796484 114.437872597779  
113.064858029749 129.042495848264 94.3329263062576 82.2519263268941  
123.868848519181

C14orf131 201.180226922613 111.409762290528 255.915599666591  
131.57403028894 179.064697219173 144.785836697047 201.208357379329  
178.881586334601 175.099998331811 256.766675299448 258.038442651578  
141.447763308653

C14orf132 188.887559923238 56.2305155589239 50.7502704822135  
94.7283425282671 56.9360840563854 166.648551193168 67.5206810636627  
68.6704961638492 47.7086093893038 134.749803376372 139.385367339095  
69.6021553604792

C14orf133 123.608921653229 65.6721629145797 123.597489107285  
94.3229189690855 82.9322141700549 97.6084681131585 75.7342400123505  
97.4421930425128 103.631449539809 112.551747307723 101.187156681366  
89.9460400399039

C14orf135 230.286815921497 202.627009037401 188.236842521312  
213.933347509147 189.890451486324 203.979798245524 126.711833914667  
148.595294991115 158.685201053359 201.800572658224 238.077051775147  
206.649471678786

C14orf138 83.7215159198897 92.8006484232438 85.8362180324381  
77.5352427498412 71.4792239075993 74.7047606031323 66.8475050031365  
79.0249585610565 75.7734167073594 77.9085946827079 72.7071934110997  
89.9460400399039

C14orf139 44.9896851005259 48.5905518770847 49.7350276169552  
71.5249259772583 44.2607789091176 74.7669841575348 40.0052661202207  
52.407151732257 45.6582729799009 51.6778366958973 49.7363778831003  
52.8455400026194

C14orf142 93.2557602398938 68.2521461582047 60.9621846036092  
114.876346000655 108.779357041421 89.0495215957248 80.4479092568961  
65.5820437889838 89.0203733091224 64.6446465846487 66.5063354430003  
81.4881766238989

C14orf143 58.9201382292404 59.3406363431414 58.1840322066411  
57.5437445697293 46.7508829977587 52.5330333302271 62.4317959077388  
57.2878071731043 73.1640951333742 50.3910151654231 45.0985088502363  
57.290967307936

C14orf144 40.018129854 37.958111840848 41.528370959196  
41.4273122914951 41.1868052124344 44.4311655729487 43.8206425661746  
42.5435283762933 43.1805016690297 39.3999056968598 40.3180310664156  
41.7575097298927

C14orf145 43.2724556187214 43.2649781354792 42.8270038153139  
67.7121534934164 39.9697332660833 41.6590564937735 46.0228732507872  
61.3864512710242 43.8482802038826 46.1390887492649 42.170702295259  
41.4508241771315

C14orf147 211.109957714241 133.329721547016 231.361506886859  
148.964204638494 146.840603547323 350.917244438732 155.406719968961  
102.085154509866 279.901217752341 150.46866649779 175.798140574991  
207.540972220982

C14orf148 42.0532901689036 41.159706131351 44.3344900481112  
40.8681871019812 42.1650127805175 38.3418933808844 36.634024014558  
39.3709357615493 40.8970401536578 45.0155543555707 39.7342718293432  
39.3575468494941

C14orf149 57.4376528157926 51.4660044978406 46.1987217359283  
67.6034960135297 77.7714622826402 80.7563265626648 49.1067959632109

51.4931742685391 40.2615278292875 58.8605811695948 50.7502704822135  
52.7156971154405  
C14orf151 148.158262886253 74.621822948059 87.104092810486  
86.9274372004388 93.7924763988692 62.6839349907803 78.8250642061439  
74.5173894803763 97.5394336319916 75.9037617394486 74.1425714439424  
73.6512983066046  
C14orf153 1673.60994518271 1030.31910195147 1053.67279913417  
1171.207937488 705.283979182062 631.632335640448 1311.88650141004  
1718.44944271916 666.816487335088 2091.0611913538 2036.72286752819  
1519.01001038342  
C14orf156 1369.13346566895 645.114504971255 1067.08316477623  
913.704049709264 1580.58484708669 1195.24078948059 955.088515235485  
1090.86617066541 1601.52194699063 779.996851709716 761.922486104216  
1445.73674428909  
C14orf159 136.355036262681 303.281551940647 348.450810225807  
280.034472186873 232.847812981531 359.381284202484 160.917024416961  
123.689895848613 356.948763043851 723.853348464335 587.88126282119  
465.266372824212  
C14orf162 41.2424637338424 37.1685072112618 39.1799070031819  
42.8235313007746 38.0598374201407 46.263826584899 40.5585676679482  
39.853866204927 41.6616444147804 41.2276963324981 37.1059647239814  
46.6397391251762  
C14orf165 45.8108990837624 40.9731067463382 37.2838080935695  
42.5664883002833 39.5595233162192 44.4619248757502 36.197424053556  
38.1835938174625 39.853866204927 38.745552403895 35.046946054314  
34.3409660445447  
C14orf166 278.562093102424 266.79157803247 232.553783060082  
255.42436389413 262.215263489321 273.032063533642 238.338646661062  
314.992390390165 265.026710493466 182.80711310964 190.375732394043  
329.763197973922  
C14orf166B 44.6231541342 40.2093230376545 40.5386195997545  
40.9141850646578 45.9104478407175 42.4580504587581 44.6809101024392  
43.1931731665131 42.5864346233886 38.0540928703622 41.0808257270221  
41.0657892043496  
C14orf169 102.443884864631 47.3536182445315 58.2986825661503  
53.9517841438975 65.8319449883221 61.3620062177524 51.1541843174981  
70.7805103907761 85.6441969757275 76.1382217104599 61.2529834995512  
50.0571060701893  
C14orf172 107.538934056558 56.0477607422828 89.3568413748778  
53.593974682612 81.552417816742 92.47006193987 94.4618437533343  
110.746059249478 81.6508259258669 105.414552529943 113.504745041505  
76.6707262000712  
C14orf173 395.875593488613 363.002913525646 777.854349637516  
300.186402341399 150.114520857436 225.329170139176 315.163147652199  
546.287195443189 572.667024472672 324.126628444078 398.43592055172  
452.969595001684  
C14orf177 37.8386378737561 35.5310164682026 35.2101597814352  
39.9697332660833 35.7973685350741 41.2567470068038 40.3302268293707  
38.3684202018524 41.9635525160083 40.7063426028871 44.1148826235374  
36.449101775775  
C14orf178 37.7384958256497 36.6968906669565 35.5220586859301  
34.7266486944713 38.0598374201407 34.8956628705329 32.6039814489621  
33.6816578730693 38.3418933808844 34.1648535095605 33.5370783156523  
30.9241129241985

C14orf179 249.451753363306 147.209004629384 212.530138323284  
155.928417606775 145.972133104142 271.857378677296 193.782527748199  
163.261867589623 159.306689057291 178.559242961756 218.313812956524  
278.378459771943

C14orf180 37.1485601150873 44.9370339275041 38.9790184198145  
44.7980740332174 44.3557408297309 43.0860383229288 42.4939802311136  
40.6171774724171 40.4997186069494 40.8970401536578 42.7275315121163  
43.0930293831497

C14orf181 42.1537476443423 34.9262464079777 45.3974838013476  
45.7397504535169 42.269054475455 40.8634043028528 48.6395795163502  
33.9687743313429 49.8304479381623 39.2623423164488 45.1432412071268  
44.3521099857368

C14orf19 41.678190413467 40.148780650831 40.5734458834617  
43.7410507935043 40.831207953647 46.574682061365 38.6243997507646  
40.047314525032 43.423558862426 37.3179578037963 41.1638563416981  
46.1592873342534

C14orf2 227.317566600324 92.2530518251152 120.401643722713  
161.48562926756 247.676607756929 136.293724800658 156.56745342836  
162.993316022946 192.861174667738 155.270252661048 141.672695206961  
169.920726825854

C14orf21 55.0078788655089 58.2571968311834 54.6820069269589  
82.0292880742189 66.1650385535549 40.3357777530419 61.6544855697851  
48.272324215504 61.3733228199803 51.9547984751408 52.6960621424156  
61.7502624458447

C14orf23 39.8662795144616 41.159706131351 34.1806289878747  
40.7481155008596 38.1644569189523 35.0970060242246 43.0930293831497  
37.86982638952 33.6288663955758 38.8507804383261 36.6298807161755  
38.4330755397458

C14orf28 58.7404123614695 77.1737254584648 75.4317740345967  
67.8978240198575 53.1884505015411 139.625593914573 52.2476631126873  
53.838484549134 53.7442594289333 103.14577985944 85.6989061660348  
104.335120306753

C14orf32 200.019523376661 255.521720396044 193.043344611355  
253.980053738171 144.290966198687 196.065114892186 170.150808455621  
171.705718494906 218.510816443243 147.945429978177 137.197328985851  
211.625447303889

C14orf37 48.3451401499671 83.3729277601518 39.3709357615493  
42.0621425894624 45.1899271235974 48.260931742163 47.5963750520409  
38.9074189954657 58.7382738968248 41.2700204291848 45.6706505553383  
44.8872784170036

C14orf39 47.0940613507321 42.5660695551615 41.9666541498638  
43.1275490164761 42.8510579683751 44.9370339275041 42.8684958525042  
43.7396619462033 46.824299585607 42.1622837416589 43.0016969050339  
42.357910063876

C14orf4 359.465715235071 173.013258797349 176.07173250529  
128.38299874379 254.023393889525 281.201604778921 257.325282051981  
626.570239685127 274.493399403322 268.872239581507 406.964801954621  
336.737571879156

C14orf43 100.83436298853 68.921126710047 83.3826639718546  
80.2774079897733 77.0578241280903 95.1224420992193 73.0433648756396  
82.1225676987279 84.3526980051279 101.01459505339 93.9708162269401  
91.6777754418002

C14orf45 54.5358897781765 50.9895771651972 51.0175677516029  
49.5424425850549 41.6340461942423 64.6446465846487 55.6268253440479



50.3972033014227 47.9035532886869 54.0374522273907 49.3592128116865  
50.3388505346542  
C14orf48 48.8333989709933 42.2577689927563 46.8267540220952  
45.1944222548351 42.7982502551634 48.4758590019384 44.4639405506967  
44.1311654985682 42.9020321355927 48.0211752672327 40.723990462047  
43.2776458914333  
C14orf49 40.0557788909923 42.0709558258414 44.4311655729487  
47.2009420656854 40.2449343247539 42.157627240486 37.1643693306382  
44.7044140979108 46.2027193115397 39.5637454855233 45.310660704531  
43.3744503319109  
C14orf50 49.4151347850687 37.3634897565502 42.7303139017786  
41.4273122914951 39.7568367479301 37.3799542961839 42.0605906240248  
36.43924066428 43.2761454096265 39.7835513496873 38.079222289614  
39.9519547348106  
C14orf68 33.4240466670776 42.1607322031054 36.6522278218553  
41.5464765641928 44.6834648302383 40.244271403831 40.5585676679482  
43.1567024035183 42.357910063876 40.8970401536578 38.8507804383261  
39.0536056496869  
C14orf70 46.7293238583888 42.6939394537076 42.7303139017786  
42.0102671859606 35.3327761997046 35.4142595025086 42.357910063876  
44.4031868028216 41.5635499110307 38.745552403895 41.6336636285875  
45.0035308952466  
C14orf72 50.1533437545239 48.4980626712175 50.3950981988762  
80.0042268333735 42.7107928951766 39.8455060654531 42.1607322031054  
54.3820590274321 39.1790517315259 46.2286164776607 47.5439485437351  
44.3521099857368  
C14orf73 47.1216490839161 42.2114134935898 51.1347974668251  
46.614092935749 44.147557390293 40.209110303983 45.7452456977857  
49.1399035787209 41.5296458719756 41.3641352453779 43.2551508830106  
41.1554481567603  
C14orf78 312.530335465784 50.854895889378 60.1555629233618  
88.9113618165337 45.1137938810047 284.942182200489 40.8617699346501  
57.2856683017619 60.1102859845739 231.990562664196 195.740109330843  
120.309345127552  
C14orf79 85.5362566454799 80.7198077526005 111.735319884512  
55.0604256312495 162.151812425949 76.331185787832 95.096268847843  
95.1037791424727 79.856662992182 113.46454061183 104.02653369229  
72.9580216367379  
C14orf80 112.351686948586 73.845912534353 81.2850357499192  
67.7121534934164 106.951862149262 63.2343637481705 120.02765867291  
175.60601369033 107.222176166001 64.6446465846487 76.0420039542595  
55.2449003905956  
C14orf82 108.022329297132 107.836867810972 99.2504397421242  
108.991044950132 61.1216330559316 62.2818512646893 93.879589378061  
120.046457114882 81.6508259258669 121.45753287862 118.10944558223  
96.8141712830545  
C14orf85 2689.80835574654 1539.35554229258 1769.18069954113  
2393.42629339901 970.379875059112 1136.88710104691 2077.74475301595  
2978.46032143413 1384.80615431656 3088.44063817936 3070.83113612925  
2323.81110653289  
C14orf93 131.277614500948 145.741469970609 128.436305192918  
112.368910939752 127.760816230317 123.493308132159 145.267770598988  
93.9880852748373 180.189935936245 175.028390974125 155.492099076744  
176.138603484209

C14orf94 149.076166432567 83.9760574088975 100.205124008648  
114.876346000655 69.7413896580273 108.39424630351 69.0037087543684  
65.9143782252686 88.3335649692467 94.7110944331075 78.7260936224802  
100.677422836631

C15orf15 640.407302868904 515.216890329893 295.371694979522  
771.554891868456 622.435313940734 1021.71286017481 619.114937854476  
753.491584605447 673.002926695262 887.118866402149 805.309720893073  
957.682898193927

C15orf17 212.688298502868 344.38057912034 166.608353896248  
101.008449241109 221.808325312905 205.55797140415 191.631209717054  
377.847116683974 165.311139930529 426.015657750123 307.705431227338  
275.096637886925

C15orf2 37.0320432433314 40.4359177791566 40.0998167098057  
36.890925044696 38.1644569189523 35.9305494063137 34.4570158133896  
37.7612949798895 41.1742244762318 40.5090849993014 47.7535797917441  
35.1451084093692

C15orf20 33.0463640202858 36.4002279956519 41.785676764591  
35.2143190355414 40.0599807618105 37.2686490268265 36.9355798143571  
34.064698871541 37.10170285405 34.3674468322242 36.3390947880186  
37.0953622406687

C15orf21 44.7463386786906 42.985929467107 44.5622847010474  
50.766576799961 37.8305309577781 41.3553369544097 44.6032218589199  
44.4031868028216 41.8225292427334 42.22763273471 43.9701242600947  
40.4310982248029

C15orf23 66.3095900379311 86.0832675838966 53.0630927250439  
48.309866878365 99.8699868526053 64.0354923953233 101.250422688816  
67.9667104519753 80.7067505750848 42.233842834629 43.4424616940528  
47.2131144508464

C15orf24 853.947671456736 716.754656773542 554.551745559065  
1177.44875377686 908.328776521114 670.271164195182 634.023101883136  
621.734974486654 651.969296681551 483.20917825594 510.379313524019  
736.846933148564

C15orf26 40.4639532172338 40.3384318592985 38.6727842796202  
32.2212308728305 41.6806984441849 37.0180934800573 42.2577689927563  
38.6454098044474 36.4476883897928 37.1275334308172 42.4580504587581  
34.9138625012006

C15orf27 38.957687788868 44.6918600441328 37.7384958256497  
44.265834798964 40.4639532172338 39.4953494583071 39.5496902678788  
41.7419877611072 43.6670755115848 40.8970401536578 40.1742127891824  
41.6550823405646

C15orf28 77.4999637278723 72.0792554308917 64.0162246399972  
79.1000897258245 105.739423435604 54.7083331985678 95.3754438202863  
76.0709828871754 80.2112932898502 113.759627906335 114.215602320391  
96.2739664178142

C15orf29 47.5647821785529 42.9358255168086 37.4642807402741  
44.265834798964 44.0451487108213 36.8059561571675 39.6535880152834  
43.7396619462033 44.3440839686558 55.2214187655851 45.390192977585  
47.7962548556026

C15orf32 42.9104454767916 40.2493681589104 40.6737160001291  
40.8681871019812 38.745552403895 35.2067831864574 45.6042625176633  
42.9301944191913 49.641159251878 40.8970401536578 38.956280281655  
39.7411455670172

C15orf33 38.6454098044474 38.6414316877471 42.9104454767916  
36.0481934423077 38.4540849632254 41.2567470068038 46.4388841354122

40.5158867964016 39.4762546236449 37.6383530120621 40.8225507267584  
39.3575468494941  
C15orf37 40.9558083259517 39.0102066700839 46.6588655218735  
41.6564075217517 38.1644569189523 42.6575535390785 40.2154497375715  
43.4544762830742 41.863927676552 38.1042454705119 41.9083581529276  
44.6484005362281  
C15orf38 130.184962393833 81.1189042503645 65.6620676514157  
106.20479137406 67.0163226819964 94.7980740999988 160.360785581153  
89.0275988550016 78.8968326770219 117.502489192855 100.663054866186  
99.6243435693941  
C15orf39 189.737472782071 116.967446594767 82.3344892042646  
180.012192630556 131.766252431636 151.522338087219 166.652850759559  
192.700843009002 153.35286239647 105.118498939628 110.440072569721  
87.6598268114592  
C15orf40 62.7669079605627 65.084620579901 60.4809187893259  
69.3525901554637 69.0975200641705 77.7481370715949 78.6402083787251  
65.5820437889838 77.7907484334847 76.5375674421131 73.4853298204744  
77.707180044659  
C15orf41 68.0700069295224 108.39424630351 78.8357122967692  
49.7350276169552 152.792457231813 126.128760255542 96.5030525416431  
69.1973371867031 183.336550845401 131.471030729546 141.423857667761  
165.311139930529  
C15orf42 67.1387898740161 59.0709442090059 40.4882741869718  
43.4410741327254 78.5141640924736 46.0364000143537 87.2351169088172  
82.2266112813039 66.1448688879431 40.5090849993014 49.2206713037152  
40.9683275553869  
C15orf43 44.7915315085948 40.7952353240579 43.7085219318425  
46.2462906014337 46.0977687311222 46.3715909653832 38.8417151851134  
39.8016018354453 41.134180463103 45.4614234442527 44.4688999098904  
39.0536056496869  
C15orf44 71.6050174762551 94.8556191290544 73.6323065529916  
63.9570596163747 125.559679916646 86.3888090084564 99.0815700721606  
67.5709261701192 91.6649478634836 60.3768221891131 67.686778662624  
80.7227211275429  
C15orf48 151.652543512032 70.6467150815052 78.1683130800805  
1145.59111340228 118.143444770806 52.5826607585468 260.232090974645  
68.6095266659765 100.874437079608 40.2669497398702 39.5399188536544  
40.6134262962375  
C15orf5 41.4508241771315 42.0709558258414 43.4709415392696  
42.2496337895968 46.9906120932727 33.4492509999281 51.0013344286851  
44.5029690493211 41.5635499110307 51.2318935933116 38.5668610487033  
42.357910063876  
C15orf51 34.2180669723984 39.0894172982439 35.2101597814352  
36.6501141438378 40.6723334103791 37.1317006162938 38.5066108855005  
36.8400213077707 40.5912213523345 33.6902293666089 42.170702295259  
40.2669497398702  
C15orf52 348.206465194205 845.41973083225 411.254448823371  
94.7283425282671 153.139323479953 330.737070535671 60.3928833351886  
167.746168796779 215.955919625615 711.08269990525 543.084891192607  
461.500892766266  
C15orf53 37.4554876386402 34.3715326040967 38.0452862258803  
50.2163892855092 37.5556299264699 36.4986986135769 38.8417151851134  
40.1474543172332 38.1169703906207 39.2623423164488 39.8184668132023  
40.0557788909923

C15orf54 36.1232327599945 34.8137085420423 34.1806289878747  
33.0463640202858 34.0927410219282 30.8824580894159 38.5066108855005  
39.0620487644635 32.4931776430014 32.0298369224145 31.1853651446075  
32.8921051249019  
C15orf55 42.6036491382658 40.4359177791566 36.1042012504758  
41.4273122914951 37.956732373465 43.2805590023412 40.4359177791566  
38.4540849632254 38.6322728994674 36.2435874904689 40.9157352260901  
38.8495095797881  
C15orf56 39.266565827316 31.7645650530049 40.6737160001291  
36.3604951341921 39.5595233162192 40.9506062495231 42.2577689927563  
35.4526946152955 40.3316153483289 35.195364621675 35.3362091871364  
40.3691324547049  
C15orf57 61.356483470053 55.6972661824064 47.0940613507321  
76.9373289454707 58.8961770381033 60.877229406755 45.8980298854198  
49.7309743973184 65.9254098858352 56.1912096308988 53.8856501960117  
78.6048653630165  
C15orf58 42.7150227340364 48.4497719907777 47.4740726032707  
41.3027031037343 42.9090346219023 47.2009420656854 49.1067959632109  
44.4031868028216 47.9035532886869 49.7259371799014 43.4709415392696  
40.5703581862752  
C15orf59 52.6960621424156 45.2556760873335 41.3366779545815  
43.5627649099623 79.1039287828151 94.1128427766432 44.3440839686558  
50.9933795450314 60.3977304934451 70.9702772728923 68.1513215633609  
60.0940570991178  
C15orf60 39.4710743516517 38.3322849790657 38.6727842796202  
43.4410741327254 35.7973685350741 34.6977013306396 37.830876898596  
36.8400213077707 41.4636047919453 38.528621456378 46.4205654140754  
40.4639532172338  
C16orf13 118.05982513603 165.220069268347 160.171133984141  
114.41703170676 186.697432898147 154.355197155161 179.629622763381  
90.3531863862054 162.160380044249 124.56803502087 132.172127966602  
107.337113678019  
C16orf14 65.0721641331632 77.1737254584648 80.1665291227124  
79.7937658787441 117.389308836013 94.1128427766432 79.909124697198  
43.9366081640576 96.7422527189063 59.4309046716701 84.8808332740321  
80.3500323413132  
C16orf3 39.7576136507593 44.7829632472754 43.9450023643394  
38.9534635879195 38.6454098044474 39.4953494583071 35.9058393060637  
41.6466169548846 38.7298222155532 37.4302011516587 40.3452320167286  
39.6352613956998  
C16orf30 134.113913870501 121.542387231625 244.498602338731  
140.175068871414 117.893268074013 175.74424749223 45.8980298854198  
68.8058577447202 51.0062122023297 230.486681581762 282.035361446993  
114.224091812993  
C16orf33 310.255767356827 299.524171071613 263.765914589758  
230.197573134703 408.080620074472 272.663785805238 404.524605612471  
172.433936159136 380.988918630713 290.710970844525 251.2365884576  
208.379981648601  
C16orf35 94.4340798026852 113.26670675749 143.068901273486  
94.6432868887401 128.89714160809 82.9449579428926 134.489077146096  
82.1659654020827 138.67794356779 122.405413080836 116.663501139305  
90.8550873130713  
C16orf42 75.2475238554276 73.5534417023453 97.5849495690144  
66.7750249658122 88.7928773498158 83.7019398654324 81.0331497830643

54.0507720792049 79.856662992182 95.8075612515186 95.8149149211251  
76.4580830432622  
C16orf45 49.1868644496737 41.0678614026819 60.6567691532561  
41.7614975630362 45.4751076037511 103.569150754726 39.8695929627783  
43.3262148375525 44.4395580493118 77.6056319020116 73.845912534353  
76.2533853403813  
C16orf46 42.6036491382658 40.6380495994768 46.4569566520107  
42.6913548400127 42.1650127805175 38.7340969861754 43.3262148375525  
44.4031868028216 40.8970401536578 38.8507804383261 39.9070785037411  
43.9541718254769  
C16orf47 45.1912496459517 46.3635803515159 50.0748292497578  
51.0175677516029 47.3172462673426 42.2577689927563 55.4004611309636  
41.7419877611072 41.863927676552 46.8954576545929 48.2050207071554  
40.8681871019812  
C16orf48 93.9756797434207 149.213844580441 211.468527316402  
108.168107241759 149.665486488005 203.178221073902 227.059460958349  
154.633672616367 172.39907939484 188.13862794196 224.14182624489  
176.670909065664  
C16orf5 49.6241203903354 49.1283590719461 100.205124008648  
61.3747706295648 46.0043807840705 78.5276518966943 40.9157352260901  
44.797320243931 45.3756389170606 78.0658258913875 68.6199296680241  
68.3234331335073  
C16orf50 39.9697332660833 39.5573415356949 43.8495248991589  
38.9074189954657 46.2478069975709 38.5252456306656 39.2533668167483  
39.4710743516517 40.4518431978241 41.7405682794166 39.0788811357542  
41.0657892043496  
C16orf52 44.2350046179299 50.6774883370457 47.3861758958576  
46.7577982595088 68.4323624797175 51.8103411703261 45.1017494688414  
42.0494116081998 50.2223403889892 53.0357938671646 46.0905079010237  
53.3059058105836  
C16orf53 105.212030988223 85.8945498067934 79.0962508551502  
83.6935756500468 247.134338953977 126.659160169574 137.239944506217  
197.540681021755 102.771611905219 95.92436282414 97.6552689677199  
95.9391851122771  
C16orf54 42.1537476443423 41.4508241771315 46.0727230219512  
37.29566077996 37.7576900881741 35.2067831864574 42.1607322031054  
51.8347877274018 33.6288663955758 42.3606390470387 37.0180934800573  
46.5650556481721  
C16orf55 42.442231667357 36.3110701990588 44.3344900481112  
41.0726336841311 36.7356360093603 39.6251842352088 33.9750800030909  
34.2814697823693 37.8319142847141 39.7835513496873 38.3684202018524  
42.2577689927563  
C16orf56 294.966924715506 270.349279607582 585.421238639853  
217.976796656266 254.920345078558 199.660904693786 284.105466865264  
342.73665541549 176.43047680293 339.767107648884 323.705254926762  
204.774090707986  
C16orf57 145.694779669933 120.418406532204 144.281881262975  
140.894046694804 104.704892803169 91.4446109489387 132.541333041312  
111.714563124738 88.4594321382477 85.2634032339854 83.1874704625702  
94.4769283676944  
C16orf58 538.153124145211 640.407302868904 789.511653564341  
335.249352041342 513.57613902662 431.168903637888 334.170764774986  
808.857027942253 308.183340806373 585.054570630252 542.069156178791  
495.705224781189

C16orf59 93.3605294458382 96.981661155293 69.6554376880691  
42.1273928203021 120.309345127552 45.4882438975269 113.039124313172  
68.8058577447202 102.962105111048 40.5090849993014 41.6336636285875  
46.917149434588

C16orf61 898.668526777346 576.140066807763 776.670493028756  
659.666977039793 721.266942608349 460.162024551004 982.428740433235  
666.816487335088 922.047328788961 463.84209540456 496.791391622565  
704.601607617837

C16orf62 48.4849194706125 52.1967540852276 70.4794854241035  
71.7167037224069 58.6481644777552 63.7818442618767 45.6042625176633  
48.6441988290952 59.7483827511172 57.0581769379589 64.898351831341  
59.2035499250243

C16orf63 319.596352961751 284.241284057415 357.111253129662  
246.274692971423 227.504982571709 353.751797948675 216.606583011866  
297.701126167694 298.988745247509 278.140612054333 277.665554240228  
302.143385957116

C16orf65 33.4902421268456 38.5252456306656 37.2838080935695  
42.4580504587581 39.0564222526273 32.4301586830653 38.7337086062875  
33.7818132446042 38.0213051227859 32.406093465115 37.1059647239814  
35.8429598823818

C16orf68 139.311807081199 168.426372075344 183.584085676174  
171.043935516593 140.309952483162 167.319747725488 144.046404221564  
145.050655626219 173.891042920642 129.213574379351 137.302487233881  
120.149188463323

C16orf69 40.3478825593224 40.5400384479766 42.157627240486  
44.9370339275041 45.2556760873335 47.3791873993182 47.8947595316832  
42.4580504587581 43.9450023643394 50.5252048155459 42.2618615571566  
41.3481355128089

C16orf7 190.675425748381 131.917451557976 263.765914589758  
259.43283734195 81.929796716054 114.769498252688 146.117756310709  
119.41355955168 152.441506175141 121.36340610316 114.5696064637  
98.6039579639704

C16orf70 125.891602778425 75.885672222265 106.912316023598  
80.4007868743886 60.8550020364269 71.2787833369055 86.6798536307388  
78.6911549149983 93.2557602398938 77.268323196327 86.4195039096886  
69.1099722732115

C16orf71 35.8208542506595 40.5400384479766 34.1806289878747  
43.5627649099623 37.956732373465 45.0882356578404 42.629412460409  
41.2551966132486 38.0213051227859 41.6373771565199 39.9070785037411  
43.2776458914333

C16orf72 143.443713592074 120.001312008518 145.711534348895  
235.544416908354 133.765486891316 165.107387190373 93.9805435116156  
162.513675180449 139.328628553223 204.710892826638 182.866502637283  
220.426780242132

C16orf73 40.3478825593224 41.8848959280916 41.9666541498638  
47.3574589211166 37.8679241954337 43.5752393599169 38.5066108855005  
39.5466975353131 44.3440839686558 39.2623423164488 39.9899430628542  
39.0536056496869

C16orf74 51.5888395924843 91.31756001203 157.463465828715  
42.357910063876 67.6011992144113 37.5887129572848 71.0369238830779  
52.5909491535773 153.279284223069 169.18132209076 123.190887747662  
112.585860083115

C16orf75 164.262531918679 224.412339736769 266.005181829441  
100.168016285684 162.30238363798 80.9821967801845 368.972794063004

401.45848063233 259.626847216881 105.414552529943 102.87193290903  
136.011269830829  
C16orf78 40.2543341073001 36.6002100641539 33.8558232866797  
42.0102671859606 44.147557390293 44.3648993568405 36.08956004634  
37.6557714476853 43.0930293831497 40.7063426028871 34.9428206949566  
39.0536056496869  
C16orf79 64.546412747238 86.6854406823303 68.7091708087448  
61.2213001749372 60.8550020364269 45.1873487463472 81.454335582503  
60.7942162859036 80.3805507705979 69.8941497035747 65.8748459696377  
63.2699016184868  
C16orf80 188.042978085327 264.161390133378 149.792346524401  
145.526972410673 119.088986733238 167.319747725488 200.002687565519  
137.720182545143 156.02592319461 189.47090669378 143.973063517706  
206.857208722995  
C16orf82 33.2552842693684 34.5023764006976 39.9101908547397  
37.0732977341185 40.4639532172338 37.3799542961839 46.1634822993009  
42.0494116081998 37.4540772310118 41.7405682794166 36.7283081422707  
36.064718696392  
C16orf84 42.8482181313226 53.6816179316072 45.270814840882  
42.7431359850339 51.2024692590155 44.2607789091176 52.2476631126873  
46.1265102517879 46.0679399375659 43.6701228397031 45.390192977585  
45.7258895124195  
C16orf85 36.6480005877129 34.7135536792489 40.6737160001291  
37.8442841690502 36.5393857306744 38.2293008890613 42.0605906240248  
36.2539950294089 36.2733735494625 39.8873706855774 39.0550139257658  
34.806104801006  
C16orf86 44.6231541342 52.2501726671381 64.5232087947596  
75.4466520363487 49.452985143568 57.3797835448761 58.0139597055449  
42.0494116081998 46.4861258030402 65.813547096222 63.9029785089421  
55.7067742610401  
C16orf87 112.551747307723 178.675242612997 166.734730009916  
92.8026641003757 142.251426773121 104.914715637173 187.888403806895  
127.596368103014 140.01041112896 95.5156363110528 128.559660070271  
145.14768503072  
C16orf89 32.9174234020987 44.0409178714232 41.8751578329365  
34.8137085420423 33.8558232866797 41.4508241771315 39.0458123429605  
39.7509165247419 37.3600014814388 37.6383530120621 41.0808257270221  
35.7451401627836  
C16orf90 38.4330755397458 43.3972849968032 41.3366779545815  
42.5664883002833 40.148780650831 39.6251842352088 40.4359177791566  
42.7965563818112 40.7847110517594 40.7620472083159 37.9553529562144  
37.5556299264699  
C17orf28 116.17375251898 108.649424858333 125.27802197261  
59.0965219753805 79.1039287828151 52.2089306840125 119.512426152446  
118.854313907627 105.140085606412 107.987729161223 90.9641417408475  
69.1099722732115  
C17orf37 53.4921736109774 53.2841144999258 58.4137028673494  
33.4819739460148 55.6991707857987 50.0748292497578 60.2399886747451  
48.4670130605028 86.8463723709337 60.6266092582071 57.6831182451733  
59.6757573886627  
C17orf38 45.7356815244513 47.765848710116 46.2625470410195  
54.6089451252049 41.9842695818285 43.2805590023412 40.1235656101329  
42.357910063876 44.0519245668737 43.1839109702714 39.6403089864678  
38.8495095797881

C17orf39 54.2648201582657 54.1577182755284 61.8701572127817  
61.7502624458447 63.5441268694915 79.953657052127 54.5772630900888  
52.9153129566242 53.3932110698117 65.7321440516177 71.6050174762551  
70.9377012403023

C17orf41 45.9542131221291 44.1649412077735 42.8270038153139  
43.7517118200398 43.2995113692066 43.5752393599169 43.2783959177939  
44.4496572515025 40.2649309204478 40.6500508575994 42.253702372605  
44.1861590259178

C17orf42 39.0620487644635 44.5152708955623 50.1860191642359  
37.4223289687135 44.3557408297309 41.7627910693483 40.5585676679482  
38.745552403895 38.9834959368496 39.4710743516517 38.2795150354677  
46.8129509799753

C17orf44 53.7507429765038 110.960501850409 111.880226272362  
120.807573842238 65.8319449883221 54.7083331985678 73.4820932957859  
53.4109882045447 61.3733228199803 74.2379710965903 55.4694986901287  
50.0571060701893

C17orf45 1595.69503047506 2581.34849558524 1501.67042548971  
1426.87261062373 2091.0611913538 3010.38998829232 1634.61795848352  
1231.77360353254 1928.53890809223 3465.3013599062 3263.05269150231  
3421.24021192326

C17orf46 45.3872406432794 44.6918600441328 43.1931731665131  
39.9697332660833 40.8873907150245 40.3357777530419 38.941855825269  
49.085741080241 44.8997235283254 42.8936990772838 45.390192977585  
39.8497227447888

C17orf47 43.0001432913058 40.6380495994768 42.0233072093141  
37.8129870676592 39.7568367479301 44.2607789091176 40.2154497375715  
39.4223544019653 38.2874316439311 40.8970401536578 41.6657053704762  
40.1700117452801

C17orf48 58.2902084992082 50.8114699212931 57.2960245538881  
54.8412943008635 73.6965494979349 64.0985088513857 71.5249259772583  
71.6202385170491 58.3564461855595 89.3989848564067 72.842552380479  
106.5477041881

C17orf49 569.244038644604 423.804472820231 440.282299601096  
601.611039798626 352.339572553069 291.94914449218 850.205634919459  
279.485290822376 305.119894105297 283.484056482174 326.500804513133  
347.552309199761

C17orf50 47.1962846565261 43.3458769998118 42.157627240486  
51.949834638817 40.4639532172338 41.4508241771315 41.1507980856436  
40.931294690669 43.2761454096265 41.7405682794166 38.745552403895  
40.9683275553869

C17orf51 46.8954576545929 41.0678614026819 41.9666541498638  
40.1804147506786 43.7517118200398 50.560825686187 41.4742337714895  
45.063792968927 42.4784375889044 44.3648993568405 46.1390887492649  
45.1296099011771

C17orf53 180.475056805817 138.568626520133 96.0654949568324  
66.7750249658122 237.754990288051 65.564930068976 236.139267415604  
221.049503614433 203.373397813051 60.2877434874622 49.4593570700221  
48.5123041297835

C17orf54 44.3355304829989 39.9697332660833 40.4070046183108  
41.5464765641928 40.8873907150245 47.6803619768589 39.5496902678788  
36.9355798143571 41.863927676552 44.4652605017595 39.2542963855807  
41.3481355128089

C17orf55 59.220967994972 47.2055133646385 44.2405728317107  
50.2163892855092 51.6869155634183 47.7556758818053 50.8388984085636



47.9942520395434 44.5303781239209 56.685925255591 53.9517841438975  
50.5511827666954  
C17orf56 61.5882375235292 71.4197504261453 75.1477470681238  
59.6153684374766 87.9963662401769 53.4466111440611 64.5722284870633  
53.1052228246467 76.2591822114739 61.8529316708431 58.9676332048764  
65.1251519077199  
C17orf57 43.9309845324767 44.0409178714232 44.3344900481112  
39.9697332660833 39.4693871570028 42.157627240486 42.1607322031054  
41.1575777497576 40.9901805728485 46.0119912782855 44.9713479185144  
43.6753843488695  
C17orf58 149.330073823683 195.672836308456 108.779357041421  
131.431274187099 232.47874874281 502.435496018532 229.188779190649  
106.917042272027 192.112101000423 193.758357282411 149.173801572239  
200.203393423652  
C17orf59 56.121460370892 56.2851430356168 76.3583555666815  
68.4261608261522 69.6330393135101 64.0985088513857 81.0331497830643  
63.61404854326 66.1448688879431 99.1438953564062 89.0684909049451  
77.4769634299218  
C17orf60 63.2753814090696 55.0897019602305 50.3950981988762  
118.316810638061 79.0039595317374 67.8208976798364 42.0605906240248  
47.6952179922944 57.7865070833351 44.3648993568405 46.0095710163378  
49.7336769474446  
C17orf61 970.379875059112 475.621740714165 707.4124863603  
750.151825182993 762.388959943712 756.801598119483 1214.73798692268  
1213.3477481374 572.968592371501 876.959744461441 867.856842601788  
901.793120584383  
C17orf62 385.36587480414 333.421080658854 338.966238813782  
558.451033789799 304.977139992391 233.294970051779 365.792144095604  
266.905855859261 395.875593488613 256.843419520398 202.060761076547  
186.866378606003  
C17orf63 134.285947677624 157.615972646659 135.00141569592  
89.2503940049313 214.51120218554 105.197692490363 144.456117600129  
144.515737827731 128.749209040345 111.703187941409 130.64028226556  
142.012216533823  
C17orf64 37.3463875295726 46.6314009405034 41.2365089689635  
48.4916117779992 48.1473938886239 40.7616966228404 48.4859552186772  
44.293922970134 44.0519245668737 46.1390887492649 40.547835538778  
48.6037684272115  
C17orf65 97.0254711947754 63.2804984998739 60.3973027611091  
44.0451487108213 90.0942781313264 55.7197525213035 83.374777060444  
72.5835488194631 73.4853298204744 72.961444366037 79.6198202883864  
60.5948704279864  
C17orf66 44.5282181324797 36.5219488315447 36.4564050256915  
44.6905691366696 42.6022652963326 37.9951997351435 42.7431359850339  
47.6952179922944 39.9444191873552 38.528621456378 43.6629145624937  
42.357910063876  
C17orf67 31.8228237796461 34.7135536792489 34.1806289878747  
34.5425384901279 34.806104801006 34.7983399096627 40.0052661202207  
34.806104801006 37.8319142847141 29.4322896559759 42.7275315121163  
33.1559412791294  
C17orf68 52.5307002738469 65.7457567201236 75.3761360028971  
88.0827215704624 58.8961770381033 63.0324885262582 78.4937314423253  
83.9976136901125 59.7863401969736 90.3041737295567 88.878414939392  
74.2473868510319

C17orf69 64.1882546112044 60.3928833351886 67.0421310720934  
37.29566077996 71.9737561190706 41.7627910693483 72.1401612718245  
61.9787117490846 58.4891791448514 92.9894133685392 67.3976855661302  
81.6458112867541

C17orf70 428.307428028806 594.812016966595 418.552186865503  
312.045709918301 474.729653426958 252.870708814507 561.393215036856  
506.585006700107 419.993482471924 555.727708387209 490.301992866742  
356.88781087408

C17orf71 68.5457752893587 54.3554233228353 46.9040704638073  
41.3027031037343 71.9737561190706 57.6034762511847 62.5506324864207  
47.7889447429963 67.6983931011126 44.571915452417 52.022479439889  
53.3059058105836

C17orf73 44.7915315085948 45.3486182278177 55.8810837854139  
51.223859150798 46.0043807840705 44.8872784170036 51.5967098638347  
49.9332280449549 48.8067321016961 56.8201201798712 52.3761286517985  
55.4635297192076

C17orf74 45.5758521267508 41.554942319225 45.063792968927  
48.665578118898 44.9936360641969 43.9724628401189 50.0088611244948  
53.2046867327331 42.2577689927563 44.6918600441328 47.4630625313159  
44.3521099857368

C17orf75 40.2543341073001 49.3581578587582 44.8872784170036  
53.9517841438975 47.8075998240396 56.6172748471831 46.7100796279384  
47.2009420656854 41.6616444147804 50.6486940895674 48.5292718280498  
43.6753843488695

C17orf76 44.8914371498528 42.7775752471711 41.6977706798234  
45.334106390212 44.0451487108213 47.5733603903505 38.7337086062875  
42.357910063876 45.1899271235974 42.4594149893798 50.3876754565799  
47.5025821041537

C17orf77 39.8662795144616 40.0527893189096 38.4043916290561  
45.0798408927912 36.9702228618069 38.2293008890613 49.1067959632109  
34.9580369221164 37.9273653326866 41.0057887014368 39.3667161654772  
41.2437378488025

C17orf78 38.2083710281545 39.1982470626863 37.0642268327439  
35.2143190355414 37.2567512265363 38.9378717994178 43.6753843488695  
40.6171774724171 42.5406888281114 34.3674468322242 36.43924066428  
37.5556299264699

C17orf79 125.997088252817 79.8196996067124 60.8942621888353  
87.9098670472958 133.151333210366 134.884412058457 124.965915196815  
98.4405692451144 104.103899614521 73.4447529556358 87.129027106167  
105.74849082793

C17orf80 66.4399491500833 60.3928833351886 60.8357760968871  
64.6945454069792 94.3450965454031 66.8632294055679 63.5738862549306  
51.3472428383325 75.891637602914 51.3351387089044 51.6414075056938  
66.8026147385682

C17orf81 62.0104160416544 55.8046062733709 68.878562323012  
59.217781407734 53.5594683028749 65.1073309230686 62.1397042662581  
58.4816190076338 69.6272083256793 59.0965219753805 56.9097893863465  
64.7050732790408

C17orf82 51.5888395924843 63.7721358300879 61.2153068100932  
44.265834798964 61.3077641493507 48.1591264215184 66.5422130374814  
59.8760452220989 70.0801020070064 79.1074681877535 64.7598303406649  
45.5800840647989

C17orf85 117.439175394651 99.571118823509 93.5717680539357  
87.9098670472958 91.7629175712824 117.907440794926 134.908982962131

109.738537924214 84.2299424587647 139.328628553223 127.596368103014  
102.605473054584  
C17orf87 51.6558970571712 52.5868047927666 41.6977706798234  
142.048367760597 44.2607789091176 44.8872784170036 52.7002314230604  
46.0633179231318 39.853866204927 41.8613406887824 43.3085358214154  
39.4490233720848  
C17orf90 334.349204174886 263.330471155421 350.451704069255  
183.286063142727 392.796524588309 181.2179249806 397.745727767552  
231.060688044554 327.108892199594 263.832968124343 298.252355588344  
193.676161965973  
C17orf91 96.6833301748676 255.884444464408 239.023368693467  
277.204818876581 111.877209777434 342.058245939495 79.5707751325986  
148.906660152784 101.46584765758 86.7076796107636 82.6116645182046  
157.979422616649  
C17orf92 43.0930293831497 33.1817617228171 42.0621425894624  
44.7980740332174 42.269054475455 50.4022543872993 46.7100796279384  
48.4670130605028 42.357910063876 254.756894822368 123.689895848613  
407.949645788215  
C17orf95 58.6352379241827 61.2108152457954 74.9113162056974  
67.5518078291428 79.271901834289 67.0577715520007 69.5544840164738  
54.000164292461 75.7734167073594 50.4882744710823 54.0374522273907  
66.991625911443  
C17orf97 99.5578314630436 124.214669663291 103.746508465792  
91.8207081349104 56.359578588344 57.9559082408796 119.846620703059  
110.399579382196 74.9741052063425 87.7918574811458 98.8537074610939  
76.3334723210842  
C18orf1 46.7293238583888 46.9919960628953 41.785676764591  
40.0698728584484 43.9450023643394 50.5148383400703 35.3362091871364  
46.4672637826582 41.074824727477 38.2069499294002 37.7384958256497  
38.1421709520616  
C18orf10 104.573463811298 288.597205372736 181.381479219186  
88.3459116251233 132.007307754378 124.112216491975 227.843903680287  
134.83544047809 390.266798496438 144.239350177363 112.881899194726  
159.506157112627  
C18orf16 40.3478825593224 45.3486182278177 39.0775870687758  
36.7892997857376 47.0954207417646 40.244271403831 40.6750540874299  
45.2806199505029 40.0403898620771 46.2286164776607 40.723990462047  
43.2776458914333  
C18orf19 66.1229691315616 65.3694267397114 55.2141529491512  
96.3741876853801 84.5572894783679 53.3185097662527 60.3928833351886  
48.9826868640753 72.3095457386378 34.9138625012006 45.2265319826548  
61.9036392303558  
C18orf2 39.3709357615493 41.6466169548846 40.7620472083159  
39.3750969348308 48.3814421939888 37.9003288112261 38.2933870238743  
43.844855336215 41.6616444147804 39.8873706855774 41.9083581529276  
37.4554876386402  
C18orf20 38.957687788868 37.8217989841918 41.3366779545815  
33.5578650644246 39.9697332660833 46.0364000143537 38.941855825269  
40.831207953647 39.9444191873552 38.2069499294002 43.844855336215  
39.8497227447888  
C18orf21 98.4084364053686 133.401306624347 100.43365828852  
91.1834104205004 84.8751572193902 89.8567957512307 108.709630036731  
110.440072569721 145.676955166566 81.4621222177298 85.5839487225537  
91.6328359149182

C18orf22 72.692416146584 98.1433318215702 101.020328028769  
85.9087280306456 73.5541045639348 87.2437977005922 90.4957279507369  
61.9787117490846 97.8009303343756 81.915829566737 77.6653462778309  
108.082240435027

C18orf24 52.6960621424156 82.214837116747 52.3432130135266  
54.1240583139871 57.9161791762225 49.2050538150106 79.1432909353319  
56.9299697426319 81.8983491901699 47.0055981216687 41.2598458726002  
46.1592873342534

C18orf25 138.027432399991 209.61080762285 187.862483922786  
147.689479458785 101.738441694376 138.748233664345 153.544554979202  
225.960701908311 276.699609951994 213.520663841371 217.721787448311  
205.121208974511

C18orf26 38.1169703906207 34.15544299189 32.7043743065388  
37.9875302985336 43.1252272136667 39.6251842352088 33.8558232866797  
40.2382908228517 36.8127605061228 36.3612409063792 38.8507804383261  
36.9976231206067

C18orf32 48.1952521496489 52.683711208052 50.5089777244781  
48.9944486068347 40.4639532172338 46.4648868771662 39.3585350448719  
49.9332280449549 61.4842573582507 49.6203214143464 52.2229654768933  
52.7530873093837

C18orf34 43.4626049853157 44.9370339275041 56.4779645313958  
49.5424425850549 48.5000946421718 59.7009992986607 39.1539892144371  
46.7980335276155 39.0775870687758 47.1001757441025 51.0492389286271  
51.4968903591058

C18orf45 61.2130609867477 66.5864907685351 67.1299518044849  
46.614092935749 77.2608629053098 57.3797835448761 62.801431502597  
74.0831311663524 60.2614254907771 54.6089451252049 66.5063354430003  
54.293880614303

C18orf51 43.1805016690297 39.2907645923217 37.6356984043643  
38.1392356671704 37.8329516992791 40.040778349137 39.8390535343912  
39.2262196979245 43.2100129360085 43.881163603004 40.6373400186325  
39.9519547348106

C18orf54 50.8875036861067 59.2251746728404 53.4088637045445  
48.3772965749984 54.1745577382276 46.0364000143537 55.695361644141  
51.0724630072723 70.8606919488782 52.8496345990125 48.4717951775049  
44.5432192783161

C18orf55 197.660480001139 241.849566505679 245.004434952963  
192.861174667738 240.086349973689 413.31638457585 233.501069644324  
126.814751973459 368.793978305607 249.584588371496 256.892326800908  
289.843931942051

C18orf56 131.859371655356 111.880226272362 64.8254097948745  
54.8412943008635 248.963785838427 73.9456720099807 242.792365320043  
155.099281008688 165.867229890877 43.9450023643394 53.4088637045445  
51.6660481331154

C18orf58 45.4799270968969 47.4076235350059 42.7303139017786  
38.9534635879195 45.2556760873335 44.7804080899431 35.7055410599146  
42.6450179841129 43.6670755115848 40.2112371512838 38.8507804383261  
41.7575097298927

C18orf8 111.186223357396 215.399634344016 188.670053901101  
214.927272114101 152.159270481787 175.009248614892 155.287591646469  
168.798543634965 189.80672643731 122.024487499513 146.483908799607  
164.435300801872

C19orf10 268.309382865636 329.437593022939 208.97126697486  
331.173265739654 510.379313524019 189.267281390459 260.766438659762

243.403622361932 341.666968456707 177.722828589884 167.352766082239  
199.007437365676  
C19orf12 138.599959012396 102.457537266105 89.9227845135785  
105.515662220161 116.951729886784 119.253559091088 113.430943555215  
122.824055084598 108.196445499586 115.155021677978 110.559251404688  
102.288104112092  
C19orf15 60.9710783023013 39.7835513496873 44.696023817801  
40.9607305725196 45.5809132232681 45.3882138838137 44.7255207589606  
42.4580504587581 43.9450023643394 46.2286164776607 45.7328341667151  
45.0985088502363  
C19orf16 41.5421429082231 41.6466169548846 39.1799070031819  
37.651298468202 45.6895223823001 39.8455060654531 40.5585676679482  
38.5457716679071 43.2761454096265 42.4594149893798 39.7342718293432  
42.57175366709  
C19orf18 43.7585538437696 49.2934904960601 42.640829914102  
37.651298468202 38.0598374201407 45.7300501624017 44.6032218589199  
41.8417024632349 42.7150227340364 50.8826620053386 40.723990462047  
43.8575940017119  
C19orf2 472.522115719366 709.730555484551 538.427311162325  
326.963277148673 1033.99699402259 642.946369683508 555.356799014777  
781.223434214089 589.395944599882 585.421238639853 523.25106120389  
626.390544175817  
C19orf20 51.413025495745 46.4569566520107 48.3847843498476  
57.8277957325085 54.5055246687169 49.641159251878 49.8281348927244  
48.8333989709933 60.6505672212119 47.1001757441025 51.1137916805019  
48.3648494350286  
C19orf21 68.1780382173625 50.4872122867759 54.0536858212253  
63.0153175111747 48.8381507187986 49.2050538150106 42.629412460409  
65.4714272652857 48.2123120250343 46.6598879466655 50.0808824383821  
37.4554876386402  
C19orf22 739.104939969224 738.66912772732 581.093069802913  
976.566026758227 822.372309550325 503.529187388654 715.662312404643  
582.017297217368 1078.86166154061 449.564281713066 576.830397705584  
475.75173151481  
C19orf23 49.9419897484381 45.9266745571724 43.0971787292711  
46.8954576545929 44.8897737954573 44.4619248757502 54.339958888486  
51.6660481331154 52.3579564953125 47.4767851750188 46.0905079010237  
42.1537476443423  
C19orf24 161.109600577001 167.678403380953 148.654594696193  
180.648144492464 313.399524593316 129.675613712326 153.736638194572  
197.598956071422 145.526972410673 183.311305255895 132.3192754634  
103.071727621257  
C19orf25 96.4033477961156 76.6936010119768 82.051509943308  
96.3741876853801 136.04447103201 97.8052968915826 81.7434024567356  
87.1561568256908 92.3388129097482 96.3495443565738 112.281286038716  
90.9361642101537  
C19orf26 42.7150227340364 35.8227939208521 38.6727842796202  
32.554751989205 41.1868052124344 36.9060997041453 39.5496902678788  
38.956280281655 36.8127605061228 36.9102644736882 38.079222289614  
38.1421709520616  
C19orf28 68.2184093305248 64.8903340853337 58.465017287283  
92.6736029146947 75.0180570721975 44.6524308640784 57.51482768194  
61.0831990510269 61.7559532093027 41.3641352453779 52.5930185400362  
44.1861590259178

C19orf29 63.9851732498913 65.6010220593397 78.0013795192762  
49.5424425850549 101.681822254799 70.1074782747874 66.3944891131864  
67.3410712668476 83.6000059297772 76.1382217104599 79.1922819549042  
60.4275887778048

C19orf30 50.4872122867759 46.1569135229922 42.8270038153139  
52.1201052574162 46.4343327861696 52.2089306840125 48.3411413510851  
48.7814131120945 51.2066664465185 55.6069214673486 47.9942520395434  
50.5511827666954

C19orf31 11795.0477101407 6873.84878164654 8545.48005557056  
7785.77078492993 7168.83136860899 4858.39551231606 9326.9018948838  
9060.10165509099 6258.22561934986 8827.37298329149 8259.38594893529  
7075.82842238887

C19orf33 7681.71833395626 701.168333137671 610.502562878788  
81.6780581904253 147.388500451427 66.0069448981947 949.923102632043  
1566.12726152736 350.584135047249 1698.18614771363 569.966632625157  
867.856842601788

C19orf34 37.1485601150873 46.8954576545929 34.1806289878747  
37.4223289687135 41.467005949568 41.8613406887824 37.7136011474903  
43.6434576713809 37.1820543575123 41.8613406887824 39.8184668132023  
35.8429598823818

C19orf35 40.9558083259517 48.8584917918986 44.8872784170036  
46.1673159982664 45.9104478407175 45.4882438975269 37.6036146841933  
42.2577689927563 42.0621425894624 46.6598879466655 42.4580504587581  
42.8864415494484

C19orf36 39.1590964332473 44.9877531846933 43.0589430473426  
39.0031581123233 48.7288537840562 39.3483872785093 49.6872467499977  
42.0778399888414 44.4812539947185 42.6211340086915 44.6892782664938  
46.0201052072883

C19orf39 49.3463416794995 54.6793272901524 52.6275131390249  
58.5406981871153 60.7495043977707 41.6590564937735 51.1541843174981  
43.844855336215 52.4539007817929 53.3059058105836 56.7765567227989  
49.3087627580849

C19orf4 45.7356815244513 44.7829632472754 43.8495248991589  
44.9370339275041 48.9627346956003 47.4699236780425 46.1634822993009  
60.9009676344258 42.1594905198929 45.6868589181768 47.0110068985119  
45.4799270968969

C19orf40 57.934905173625 62.5528124447176 65.7670524353661  
56.7927450229377 84.3040298294164 59.8102324370568 106.712703356565  
72.9752827496503 88.4594321382477 54.1683282066029 53.4088637045445  
52.3896785600751

C19orf41 39.266565827316 41.6466169548846 40.4070046183108  
41.4273122914951 34.6227169056411 37.5887129572848 38.1793598983615  
37.33030683349 41.4636047919453 38.957687788868 38.6662194645633  
40.0557788909923

C19orf42 126.897002134472 96.5102825310977 130.313381811168  
95.6215575902122 134.83544047809 163.405230398941 112.113501370522  
123.219313750907 132.684895918889 166.648551193168 177.460053912279  
147.902378647394

C19orf43 276.029709051798 322.509777895373 247.298165265093  
233.294970051779 578.820199675035 434.523449093691 378.358853591082  
251.210603834628 321.686871145301 186.64040927334 290.316757790733  
275.314994786888

C19orf44 51.2851682978581 53.8499082625091 64.0162246399972  
53.2046867327331 57.5685357492202 50.5148383400703 45.7452456977857

50.5070012045444 59.1223319112238 71.5032996449402 70.0965466297064  
65.1251519077199  
C19orf45 59.046385957117 171.360248172138 57.6371756925687  
43.1847628331565 76.3790849853724 45.2852528185486 120.231435193839  
127.961989181945 77.5480089703916 48.1392888470269 51.524711857679  
43.5738557773903  
C19orf46 156.636360703756 132.84476910529 152.679927202674  
42.8235313007746 195.864827360933 55.7197525213035 220.36831243882  
148.255880793905 185.874151272261 51.4454142248566 66.8188271427672  
50.3118072462443  
C19orf47 50.379587451669 46.0023068797812 48.7039705048129  
44.1483976313959 48.3814421939888 50.4022543872993 65.2361525412756  
59.7744650739434 65.3672880026114 69.6511571901941 50.3876754565799  
51.8562635270111  
C19orf48 126.826715174564 157.250548147161 134.152059562322  
70.7202372217584 373.914455300185 115.277469628296 248.744491123257  
164.96500173066 253.072560237983 166.233911320677 151.111664091983  
106.20479137406  
C19orf50 150.396608064863 177.29096218424 145.250323683031  
177.985573759136 180.916465721523 232.048938339214 155.855834721836  
159.52633805025 192.536546957155 169.527304857688 182.37433006793  
140.01041112896  
C19orf51 69.7442393277127 42.5269793679335 42.640829914102  
35.9521941716188 47.6884372645373 39.6251842352088 37.830876898596  
54.1731035633439 47.7086093893038 40.3235655331796 42.8263096141654  
42.6758568421347  
C19orf52 152.054785478928 157.394782571468 210.032782918825  
101.403739410832 245.004434952963 122.599723509633 192.003788858976  
149.515611848932 164.343309332109 121.557478857883 135.580139597457  
159.747484721905  
C19orf53 543.640122689871 284.620447030305 319.871452890512  
398.332925006466 886.397061577531 456.023620287811 483.882804472844  
594.611678976716 444.471597593258 440.282299601096 435.901460958456  
483.20917825594  
C19orf54 59.987045425047 74.4696354388511 67.0421310720934  
58.7338159410728 79.5175547131776 60.4065050472082 107.325456368022  
87.1561568256908 69.2001494999588 85.1950626054282 72.6731815563159  
58.8188963227059  
C19orf55 38.7537364570873 48.109747794187 44.8872784170036  
35.49696651597 49.32293280121 45.9266745571724 52.0942589368478  
42.6450179841129 48.2123120250343 44.4652605017595 42.357910063876  
45.0985088502363  
C19orf56 394.00931573564 367.451332073134 490.301992866742  
309.698059657254 575.268446033282 431.353025968649 383.578947165143  
586.281182112872 480.13416648493 684.238999553691 592.989860385203  
476.653723741096  
C19orf57 43.8582747295766 44.6360645306497 46.1653991089885  
44.9370339275041 45.310660704531 44.2321845867179 43.1931731665131  
47.0362584198466 40.8420925848403 43.0919221375514 48.7814131120945  
48.1627097465883  
C19orf59 58.7404123614695 41.8848959280916 51.7138050344355  
1693.5377672895 51.6869155634183 57.0775902639215 149.551650453179  
45.4757965005055 37.9273653326866 35.4990901121893 37.5583886316038  
45.2783024981315

C19orf6 191.503068870249 368.793978305607 285.053017606956  
176.07173250529 555.044139654886 188.647431971957 189.425423538906  
212.117653688186 170.475212920685 181.381479219186 252.909964162809  
167.49597550111

C19orf61 91.1363393944977 77.8946473414547 69.9179689232341  
76.6232527679845 124.559758809231 86.6910280940418 110.223625398261  
125.90746674767 123.933814581281 68.6095266659765 78.5325880060762  
89.5687388187015

C19orf62 339.854688605186 245.996655628334 302.083293019113  
250.359859946258 429.725397949276 283.484056482174 288.284384035759  
400.093769705765 319.722393409101 242.282363793567 299.136348099827  
220.79051545138

C19orf63 37.5100503181769 51.6527806785838 45.310660704531  
48.4916117779992 51.4527545197672 46.263826584899 50.2016912396771  
46.9986083378817 57.5430365699386 48.9088046212958 49.4593570700221  
43.6753843488695

C19orf66 104.335120306753 123.281175151414 144.858109227889  
120.068630086702 100.774098314706 92.47006193987 73.1654226019863  
116.184007615285 84.9075858560758 141.960773054307 119.355990535521  
119.124583755587

C19orf70 433.637087338002 675.079525434102 744.080606078086  
608.886783362316 1626.71747158994 995.397944432196 643.71203221441  
612.014486689487 825.558929673308 651.621028098039 887.118866402149  
655.03569504267

C1D 38.1672336230186 41.690833180291 41.6977706798234 44.3440839686558  
41.1507980856436 42.7107928951766 43.0930293831497 44.8997235283254  
40.4220196471124 40.7063426028871 39.0550139257658 42.357910063876

C1GALT1 66.9417866448504 48.0296332183129 51.223859150798  
51.5913529948887 48.7288537840562 46.574682061365 45.1017494688414  
55.6904617926772 55.7522234735038 54.1683282066029 51.7538628098347  
55.7067742610401

C1GALT1C1 58.4394991753791 71.1737934325596 54.8532558909227  
71.0211264570699 59.0460742359145 58.0458175620469 60.5713059273145  
58.5406981871153 73.3417666566438 56.9463858443402 64.4570366205389  
78.5276518966943

C1orf100 35.5179217192467 41.2598458726002 42.8270038153139  
45.7397504535169 44.0451487108213 34.5886782974123 37.0564573649223  
37.4484310268909 40.8970401536578 44.571915452417 40.6373400186325  
41.5536168238478

C1orf101 41.2424637338424 44.4411734611229 49.2041300973417  
38.4208429103799 41.8806343997257 42.750861693377 43.6753843488695  
42.357910063876 36.6312676076142 59.2628513357357 45.4799270968969  
51.138877923954

C1orf102 54.9879584700715 49.8642691497064 53.8333108984467  
41.9495387255163 48.3814421939888 55.5847026602643 57.8870110456492  
67.0120793767211 48.9614101792105 50.3388505346542 51.524711857679  
55.8087097725119

C1orf103 38.0648056183784 35.1224289925572 39.8299340037009  
42.6222445667107 38.6454098044474 39.5581166303303 38.5066108855005  
38.4540849632254 42.8036731479932 42.9358255168086 39.0550139257658  
42.6758568421347

C1orf104 44.5798743103596 46.0023068797812 66.737740728688  
40.4967168818294 46.2478069975709 45.9266745571724 46.0817481577316



47.2368301203382 49.1940901905636 55.3477556906605 54.9765783642973  
47.5540235065658  
Clorf105 42.7150227340364 38.1312950900467 40.1985790927248  
40.9607305725196 45.5809132232681 42.8598805316863 38.1793598983615  
37.6557714476853 38.4344387289956 37.8217989841918 40.9157352260901  
40.3691324547049  
Clorf106 569.244038644604 691.132727131746 1566.12726152736  
78.1583955490018 320.504100222566 85.1544284060549 440.830948933792  
445.875994521817 892.323580265478 600.34379987143 516.704027135707  
408.739953606815  
Clorf107 47.3289285415289 53.9634127270611 46.9040704638073  
39.7411455670172 57.1187536733236 45.3882138838137 59.6201808414962  
53.2046867327331 45.4154248354367 51.9247097592613 45.5707650534259  
48.9906383294199  
Clorf108 37.3463875295726 39.9697332660833 43.0016969050339  
38.9534635879195 45.1137938810047 40.1428591998404 39.7576136507593  
37.33030683349 44.7058233759912 36.6893251782922 41.8168470823451  
37.4554876386402  
Clorf109 105.621640443267 97.712117589297 118.854313907627  
81.2269477373795 178.323615832679 117.127994102455 102.77259665192  
107.971806573919 99.7668527666705 70.0907269565408 88.3086070495983  
111.874193363836  
Clorf110 46.1673159982664 36.4002279956519 43.401782064778  
41.1886975241176 44.6834648302383 45.3882138838137 38.941855825269  
44.8997235283254 37.2810767789306 45.6868589181768 41.8168470823451  
47.6040671292013  
Clorf111 43.0930293831497 43.9421822132391 38.9790184198145  
35.6928955245309 36.6354013629791 42.750861693377 40.0052661202207  
41.9315419791594 37.10170285405 37.6383530120621 39.3667161654772  
39.9519547348106  
Clorf112 101.103458852775 68.6804583979297 70.3613168347492  
68.6379135603075 159.540626405 69.1523164481201 207.275014827939  
170.644636226884 116.949813289388 70.3629652777935 77.0774476767901  
75.1674447943072  
Clorf113 42.442231667357 43.1805016690297 36.178547300352  
38.9534635879195 40.8873907150245 49.9699131196797 35.9058393060637  
39.9576138799997 46.1101825640108 55.7930787690756 52.5154971256566  
59.3709786862962  
Clorf114 45.1912496459517 33.6902293666089 35.6139301508335  
46.3203995372658 39.2608760193011 35.8227939208521 31.098971689775  
40.1474543172332 35.1155486926999 40.7063426028871 38.6662194645633  
31.1150868775826  
Clorf115 131.738693662183 95.9750691854349 82.4362183543935  
161.25239489071 85.7842344710572 183.393353108744 156.061711961514  
210.768576894328 120.001312008518 180.80065212092 175.193752938517  
111.874193363836  
Clorf116 129.865093249948 692.630044242985 555.727708387209  
68.9038222450855 160.080366694799 68.9562915755919 254.756894822368  
172.624182951104 249.246628143531 249.195312452368 209.551557135809  
166.511915820497  
Clorf117 40.2543341073001 40.2093230376545 37.3404647796601  
38.8495095797881 39.6123051184545 52.5799250974039 38.7745734037492  
39.5466975353131 44.1519466943185 41.7932258301997 41.8168470823451  
48.27609330316

Clorf118 27.4352294118391 47.2770121962655 35.8265993915844  
37.651298468202 40.6723334103791 34.1806289878747 32.9962272670005  
42.4580504587581 38.9006788676407 37.0320432433314 38.5668610487033  
38.3291713594599

Clorf120 43.6706764143908 43.2649781354792 41.1367478979484  
37.5382094267692 43.1252272136667 40.1428591998404 40.9157352260901  
36.9355798143571 39.5806465938526 37.4302011516587 44.3763859390287  
36.7762265039864

Clorf122 184.536327776767 182.551901102169 175.619398238068  
227.567182783564 302.667538432677 207.464632062656 224.665128374218  
228.384073242481 171.191059267941 162.000275136397 150.362006499825  
160.755701876741

Clorf123 507.620619345969 260.062749979574 286.340091833711  
283.161835288074 241.08817915181 496.791391622565 321.069136463599  
304.258586051126 308.480931502803 505.156485179198 379.79657860938  
417.4609354305

Clorf124 50.4109031027914 65.1516921033166 73.0464199386528  
57.6511495792664 79.1432909353319 53.7848321213704 58.7065473526185  
51.1279389775667 65.3672880026114 48.6669787485795 51.2729241080159  
54.5358897781765

Clorf125 44.0328992213727 46.4091752823403 40.439898672334  
40.3180310664156 38.8456942580061 36.064718696392 65.0031119608637  
44.7520317855773 50.2223403889892 59.8130420783374 50.7502704822135  
44.1063440402552

Clorf126 41.3387790895716 42.4493032770053 43.7630587657205  
41.7614975630362 43.844855336215 39.6251842352088 40.5585676679482  
36.7460922671619 37.4540772310118 44.7958122466628 42.7275315121163  
36.064718696392

Clorf127 38.5007204246293 31.1853651446075 38.8775560911841  
50.5310598656998 37.3508690072156 39.3841861812262 35.8227939208521  
36.3405039629059 36.0741672064298 35.4990901121893 40.8225507267584  
46.4499258373233

Clorf128 439.770250139925 502.435496018532 538.716947884528  
396.63268714181 963.224016480187 615.838713743621 633.385474385877  
767.489657259345 543.268021785502 426.933064567744 461.394007153992  
523.465208483426

Clorf129 42.442231667357 41.8848959280916 45.063792968927  
44.6905691366696 39.0564222526273 42.9695585740813 40.2154497375715  
38.4540849632254 38.4344387289956 40.1179210534118 39.2542963855807  
42.1537476443423

Clorf131 178.525751043592 247.843927763772 315.276749671783  
206.791464145857 231.685652845234 193.043344611355 255.521720396044  
154.829574442056 189.245501343165 162.864661742501 178.789064142469  
207.380865650247

Clorf132 39.5676051939342 40.3384318592985 40.4070046183108  
42.6913548400127 39.3667161654772 35.9305494063137 41.9393838138203  
45.5581356216957 38.7298222155532 42.2614524730856 40.8225507267584  
39.4490233720848

Clorf135 95.2614267797703 73.1640951333742 50.0050760710506  
45.8844325913247 148.99515914482 45.3882138838137 155.406719968961  
244.226756210656 122.837001441551 34.8137085420423 33.4071187618571  
36.8690774823319

Clorf137 50.2203578628217 46.5650556481721 48.8100349749783  
50.7046706880325 44.6834648302383 41.554942319225 45.1017494688414

40.831207953647 43.7630587657205 44.4652605017595 39.9899430628542  
47.1060577218993  
Clorf138 41.5421429082231 42.3550738181144 43.0971787292711  
44.4367387274922 36.9702228618069 47.9503724044453 47.4439407315335  
44.7044140979108 38.2215591930186 41.4397539024976 39.4410515050885  
39.2469742642337  
Clorf14 36.3649677956953 38.9338521051669 36.769073068743  
52.5307002738469 44.9936360641969 41.159706131351 37.0564573649223  
40.931294690669 38.9006788676407 38.8507804383261 37.3687900733549  
43.8575940017119  
Clorf140 42.0532901689036 39.3999056968598 42.640829914102  
39.1706564265495 42.4864576619427 42.6575535390785 40.7910160811527  
40.7311497914871 37.3600014814388 42.8936990772838 43.401782064778  
45.1735152121056  
Clorf141 43.2724556187214 41.7614975630362 39.991353369336  
39.3750969348308 40.148780650831 39.266565827316 43.8835874380262  
43.1931731665131 46.5411372437515 45.3894119568143 38.956280281655  
42.5365257225985  
Clorf142 71.7624419474395 71.5249259772583 111.227016020927  
92.999328769924 136.736085245679 123.032006903803 117.556281726503  
85.5316122504411 120.679433440203 108.63277045284 88.2314365506494  
84.2728210732532  
Clorf144 305.199674259628 221.450737998571 219.878589678991  
294.7772562683 282.196234758364 276.029709051798 244.070778149931  
329.677454924062 287.932410610182 220.36831243882 246.09270373893  
306.820897953626  
Clorf146 42.6575535390785 41.2598458726002 46.7058093820839  
40.4359177791566 37.6527901109005 41.1090481599939 41.706879587091  
43.1567024035183 42.9413736814915 41.1222709786153 40.7725311293918  
39.5792604499113  
Clorf147 40.4639532172338 42.6022652963326 44.3344900481112  
35.49696651597 39.3667161654772 43.8582747295766 41.4742337714895  
43.6434576713809 50.6750785584772 39.7835513496873 46.6442692119997  
41.0657892043496  
Clorf149 60.3041738676245 53.9568457310634 62.6532574724345  
48.856176220627 62.0967404944031 83.9004792286435 60.4593810615882  
61.9787117490846 66.2552876795581 68.9562915755919 62.9336909080086  
69.6579723433329  
Clorf150 44.9896851005259 38.1312950900467 40.931294690669  
44.6905691366696 37.0526522140242 46.3715909653832 35.8227939208521  
36.0306975524309 42.8036731479932 32.5178504369282 33.9478220100351  
46.7182294568603  
Clorf151 45.1648925137409 42.0709558258414 44.5544727111028  
44.1483976313959 45.4751076037511 46.852437033077 41.1507980856436  
46.5717043290731 45.8325181856483 43.0919221375514 43.363245077835  
42.7275315121163  
Clorf152 41.9823787224629 43.9063490244748 41.0705134231814  
39.1302941526825 44.7114813656401 41.5146360101556 40.9784333688086  
54.2445399731644 43.2761454096265 57.8005007012205 53.8033413701278  
45.7258895124195  
Clorf156 40.6062943725118 39.1982470626863 39.9101908547397  
38.6835649080278 36.0439235933921 45.0882356578404 42.22763273471  
37.2237132058632 41.2424637338424 39.6719190054379 40.9683275553869  
48.6037684272115

Clorf157 39.7576136507593 37.2810767789306 39.1799070031819  
37.9875302985336 45.1137938810047 37.9951997351435 39.4600924554505  
39.2672712041774 39.0775870687758 39.3698811593364 39.5399188536544  
40.8681871019812  
Clorf158 44.9896851005259 41.8073910693411 40.8420925848403  
44.4367387274922 35.9058393060637 44.0804700754786 42.8684958525042  
38.5457716679071 42.0621425894624 33.6902293666089 41.0050831223107  
39.6352613956998  
Clorf159 109.415404315559 145.741469970609 144.412165495719  
69.8314582428552 114.230358276599 64.9498081060676 119.277678423944  
149.173801572239 129.042495848264 108.905276555106 101.699631771662  
78.6705291023488  
Clorf161 46.1673159982664 40.6380495994768 48.4890615340603  
37.4223289687135 42.3685136297603 40.244271403831 44.6032218589199  
45.642304356051 39.853866204927 44.571915452417 48.6767028205398  
50.0571060701893  
Clorf162 199.776860110557 143.391384762612 219.616289279562  
1062.93431683428 113.747633871556 400.506633704584 191.291480830946  
178.98901256658 64.3425836997629 114.136234102574 119.808125185521  
250.41086379231  
Clorf163 92.3659612653822 71.4197504261453 99.1502352565568  
73.1447139654971 118.638732417836 75.4227827818591 82.9431583622036  
72.9074911694002 73.5541045639348 61.9882398986333 59.2106652388061  
63.7744603935682  
Clorf165 66.0303950772736 73.7873098190297 65.8455652907556  
46.0228732507872 78.258486366912 89.680151549258 90.7037473522607  
68.2309359831273 108.196445499586 65.3377940117969 69.7215372275927  
60.8662233098324  
Clorf166 70.083473392272 74.7625228047952 96.577572948724  
87.4850071876743 80.8238125943267 91.4446109489387 78.3082773071531  
85.4437963805637 105.434580236651 104.409397223301 124.350816245276  
78.0586153423713  
Clorf167 41.5421429082231 41.8073910693411 36.769073068743  
35.49696651597 42.4864576619427 36.6271061451613 39.1539892144371  
42.2577689927563 39.9444191873552 39.0648733099061 34.174642681781  
35.6427313468066  
Clorf168 41.0608773166058 40.148780650831 40.0998167098057  
41.7614975630362 40.8873907150245 42.4580504587581 39.4600924554505  
40.931294690669 44.4395580493118 44.0409178714232 47.3791873993182  
38.3291713594599  
Clorf170 44.7044140979108 44.1239711172417 50.5089777244781  
44.550322123994 45.9725715538987 45.6129956328415 46.4388841354122  
42.9887069977696 47.945438269111 41.9097689475185 45.1432412071268  
44.1452943804044  
Clorf172 92.9323002425821 106.058751335133 107.895235897156  
50.7046706880325 122.0305509548 50.8533737532786 158.532307373857  
98.3158011081832 144.633447485038 91.9185612536409 87.7844808613265  
83.5069968129733  
Clorf173 41.8409927585705 43.8495248991589 38.8775560911841  
47.0874209746031 45.9104478407175 43.7630587657205 45.7452456977857  
41.1575777497576 42.357910063876 41.4397539024976 48.1352470945488  
40.2669497398702  
Clorf175 40.9558083259517 44.7829632472754 46.4569566520107  
39.6292788039793 36.2048942610546 47.6803619768589 35.7055410599146

64.2174369755376 32.8704945047196 92.9043863423147 74.7669841575348  
51.0647893605839  
Clorf176 378.626656077546 226.843444192483 224.14182624489  
331.001195453225 190.993853866124 164.287737381703 301.139592414061  
426.015657750123 208.67074469962 425.174170332175 454.939614583134  
299.334388262225  
Clorf177 44.7044140979108 47.9128504683618 45.2313723727673  
44.7980740332174 43.004943518025 46.263826584899 42.7431359850339  
40.5158867964016 43.7630587657205 47.611018474151 46.972521499515  
47.8931773060789  
Clorf180 36.1232327599945 42.6939394537076 40.8420925848403  
39.5050383901884 42.7982502551634 41.2567470068038 40.9157352260901  
38.1835938174625 39.5806465938526 37.8217989841918 40.4504608195666  
39.4490233720848  
Clorf181 243.015896514493 276.795797048951 433.637087338002  
153.711194034581 324.877187846959 316.548339196872 311.301613620475  
272.930242946726 122.504770242427 235.514830602053 250.832808506455  
247.905335219826  
Clorf182 45.5758521267508 42.3550738181144 42.8270038153139  
41.5464765641928 42.9090346219023 39.0266821712099 41.8315602975157  
43.4544762830742 44.3440839686558 44.4652605017595 49.1067959632109  
42.357910063876  
Clorf183 44.3754281580557 46.2691225551294 42.4939802311136  
44.8813851439455 46.1606380564009 48.0121351688736 42.57175366709  
43.2939209072046 44.8568725629882 42.0621425894624 45.5707650534259  
42.57175366709  
Clorf185 33.6902293666089 38.0226905622357 39.1799070031819  
35.2143190355414 37.956732373465 35.8227939208521 37.4772922422734  
34.5886782974123 34.0382693188794 39.1621898366355 38.5668610487033  
34.6720534245631  
Clorf186 57.934905173625 104.17651993553 196.29493890075  
58.7338159410728 68.9766943946607 254.159017331462 114.947362505193  
45.3872406432794 43.9450023643394 95.0026207727863 89.377425801133  
53.1182952086284  
Clorf187 48.5835484742456 39.7835513496873 40.0557788909923  
46.0905079010237 45.1899271235974 43.3785777889265 42.3194600586894  
52.5909491535773 39.4433784795209 42.8414096678708 42.2510526338368  
44.696023817801  
Clorf188 105.247736284747 81.2182827624857 172.237164781821  
61.8997157694697 176.064476306748 67.9306669919176 72.8653205184014  
169.322551237636 121.449647909665 116.311176407088 108.12482131423  
123.022511916727  
Clorf189 39.0620487644635 40.5400384479766 44.1452943804044  
42.1273928203021 38.1644569189523 44.2607789091176 39.3585350448719  
38.1835938174625 42.992884918158 42.5664883002833 33.7948557837079  
42.8864415494484  
Clorf19 161.38599012777 196.267504470029 186.450759425396  
162.932479392087 444.544810510611 208.457587834567 206.261432452217  
192.058030454066 302.79352975792 129.081183929988 149.792346524401  
303.281551940647  
Clorf190 44.9896851005259 44.7829632472754 45.310660704531  
49.1786207920603 43.4544762830742 49.4157684139858 40.3302268293707  
44.2159020605784 49.0986627051784 56.9463858443402 58.2315917325629  
50.379587451669

Clorf192 38.7537364570873 44.4411734611229 41.8751578329365  
44.4367387274922 38.6454098044474 36.0306975524309 39.2533668167483  
45.1714698794331 37.4540772310118 38.745552403895 43.1931731665131  
48.8670821164567  
Clorf194 34.4021554788966 37.920964499903 41.3366779545815  
44.6905691366696 44.2607789091176 37.1317006162938 40.5585676679482  
36.43924066428 38.0213051227859 39.4710743516517 44.2142581488029  
39.0536056496869  
Clorf198 247.843927763772 261.195021649777 240.139560726101  
106.582060920252 195.127419251015 264.786938886338 299.706257810523  
186.655552987116 234.45840519702 162.864661742501 231.304658157247  
324.658458599373  
Clorf2 100.802977734227 136.517445122438 212.062417120966  
89.2503940049313 259.481036467571 121.744701580607 138.23147386089  
140.226992517573 111.845105854608 118.899737794318 106.165518810891  
124.998771394658  
Clorf200 40.0557788909923 41.4223563635976 42.640829914102  
43.9744941494111 40.2449343247539 43.6670755115848 43.2721716572958  
44.0390019242862 46.1634822993009 39.4710743516517 38.9240290061433  
47.2862299990938  
Clorf201 40.0557788909923 39.0102066700839 39.3709357615493  
44.0451487108213 40.5710637884029 41.9543948167375 47.4439407315335  
42.5435283762933 42.1594905198929 36.8059561571675 42.5426057453993  
42.7782216342806  
Clorf21 55.0078788655089 52.5868047927666 78.8357122967692  
59.0965219753805 59.6922302604696 241.08817915181 51.1541843174981  
56.1404433602127 55.5086026637973 182.246578375636 135.308001652191  
122.160438114932  
Clorf210 46.3884811643547 48.5905518770847 42.157627240486  
40.4967168818294 48.3287893866569 40.3946758935842 42.1372626664516  
40.5640952422779 48.1578509702472 43.8710182120571 39.3667161654772  
44.6484005362281  
Clorf212 60.3381680822012 55.9269493191353 70.0955779023465  
62.6048727240291 68.0414563597154 49.8472708021525 64.0985088513857  
73.8374823243007 64.4588422949237 64.428683021978 58.2941346100716  
65.3585701203568  
Clorf213 44.0328992213727 45.3022591001932 47.3381845358719  
41.6564075217517 44.6231541342 45.2852528185486 42.629412460409  
44.0390019242862 41.9635525160083 46.2286164776607 43.1931731665131  
42.828737648529  
Clorf215 43.0001432913058 44.2105195734073 40.6737160001291  
44.550322123994 40.6723334103791 46.3715909653832 41.3594868055879  
47.9942520395434 51.5229124652769 42.9866214102525 41.9908237694988  
38.3291713594599  
Clorf216 83.0534943004588 50.4022543872993 54.2670850492947  
76.6232527679845 77.4769634299218 93.3718038663074 72.8653205184014  
70.7805103907761 74.0614295574729 64.5347406608537 66.6788758487969  
74.2748495231478  
Clorf218 299.665413950641 135.540738841602 198.432987946699  
293.040690378216 114.78317743597 117.250114037308 175.960838580876  
319.043862813161 269.438510636306 301.904682664871 284.013140015092  
195.765247956108  
Clorf220 44.8914371498528 39.0102066700839 43.3085358214154  
36.264823544143 38.2496050953547 42.157627240486 38.7337086062875

36.6452480995946 38.2215591930186 45.9004543328976 41.0808257270221  
37.4554876386402  
Clorf222 43.4626049853157 45.0905928998779 49.8344973836834  
40.0698728584484 40.3452320167286 47.4699236780425 45.6042625176633  
47.3791873993182 40.137818555383 44.1379638573455 46.2560238004757  
49.5539622682049  
Clorf225 65.3531590366085 853.464809072841 345.443895623911  
58.0218262176065 90.385018479478 184.218705402964 90.1500004950245  
94.3773551105819 131.717764850211 177.845412804098 231.304658157247  
330.946598275585  
Clorf226 45.8108990837624 41.7614975630362 44.7255207589606  
40.3691324547049 41.9842695818285 45.1411314881341 42.357910063876  
41.0381860307445 40.6957787921451 39.7835513496873 41.2267153672559  
46.9867599298218  
Clorf24 131.645714321903 175.74424749223 532.581631305218  
966.803172864162 114.533239859288 3088.44063817936 215.452117252205  
196.844428284247 106.590506599473 1224.80240464583 1524.01520893763  
2101.59244895554  
Clorf25 64.1267046511632 70.2288685232877 117.228320608065  
79.1000897258245 89.4111455826308 70.8674195845729 72.1401612718245  
53.4820309182878 85.6038071277319 75.8280474316969 68.0960719007162  
79.7808217577226  
Clorf26 35.9305494063137 36.0366673493555 39.4710743516517  
37.4223289687135 33.7494761745342 42.9695585740813 36.5352572191451  
38.4540849632254 45.0017158586743 41.4397539024976 39.9070785037411  
39.8497227447888  
Clorf27 37.8386378737561 36.6002100641539 47.7737810047679  
44.265834798964 37.5556299264699 40.3357777530419 42.629412460409  
41.3506832276112 36.5393857306744 42.0621425894624 38.6662194645633  
35.1451084093692  
Clorf31 61.5882375235292 62.6984594468418 61.5824518349507  
63.0153175111747 76.209239524646 52.6226745117396 70.7238101239421  
63.0748373122119 65.4784797364469 44.0409178714232 59.3379918468928  
63.9371474698484  
Clorf32 31.5599106749655 41.6466169548846 35.7105247506212  
48.665578118898 45.2556760873335 39.0266821712099 50.0088611244948  
40.5158867964016 39.9444191873552 48.6124127998952 44.4688999098904  
43.5738557773903  
Clorf35 128.827672077002 167.982626899395 224.60637398191  
106.8866235778 184.303357812653 132.059215102854 240.934550408797  
192.564048264712 189.737472782071 198.497745548245 200.401133392259  
143.112509176873  
Clorf38 46.6348258763289 44.1239711172417 42.9104454767916  
58.1798515131249 38.1644569189523 43.6670755115848 42.357910063876  
45.3872406432794 37.10170285405 40.1179210534118 41.8168470823451  
38.2350720635382  
Clorf41 120.129857395808 121.936597605894 124.551483147457  
154.166621635012 135.737771384104 149.5664106654 159.571799428131  
96.0654949568324 198.922575188741 111.248876636045 97.1271615802556  
208.097209050425  
Clorf43 176.224645007435 190.487609390723 197.923403667051  
188.457593309678 186.195424728755 192.240593720489 161.205086002542  
227.206974078547 135.106756607914 99.6544408669512 119.355990535521  
160.755701876741

Clorf49 47.6397712007919 43.0971787292711 41.1367478979484  
33.9645433044281 38.3561682218911 39.6251842352088 41.8315602975157  
41.5464765641928 44.8003345643334 45.7911932481722 45.390192977585  
48.6795178347248

Clorf50 439.955651727755 211.701234819986 289.716911324484  
244.837105178705 334.438091900861 226.926786963011 282.38663225575  
401.956364010068 258.913621521866 292.800712773283 278.562093102424  
246.680724959444

Clorf51 53.8856501960117 45.9266745571724 59.8273072817267  
47.8164193292842 55.9283039581662 53.565717255469 38.5066108855005  
53.4109882045447 69.734208465775 61.4569050766419 60.394307846869  
48.1627097465883

Clorf52 322.678762360476 195.836475280084 258.517751279605  
199.522267292552 208.97126697486 163.048439401341 248.527031538874  
214.980684661682 90.3916996175708 318.069132873489 274.081959734368  
233.710655978992

Clorf53 191.394143505573 75.4732674021193 179.897685693038  
59.2778887402357 188.120766710975 75.5561597374812 117.260454792593  
68.2309359831273 182.411383422586 69.1623287497421 69.6097529955737  
66.3944891131864

Clorf54 332.830805115112 150.957220787781 220.192552354287  
669.776067547468 111.256949641793 547.729200972776 114.526825145076  
229.159869771704 68.5599263000733 263.44529683749 260.405228196514  
245.540041661003

Clorf55 131.738693662183 179.974187861013 169.790843803064  
187.982920458868 175.922685424474 187.16833117416 180.128769312512  
160.479699603187 144.500148287951 96.7422527189063 123.868848519181  
140.961217055867

Clorf56 48.2910530887214 60.4646208319121 73.967017874248  
46.7577982595088 56.0477607422828 47.6803619768589 50.8388984085636  
58.3046521633424 61.1022920882065 53.0357938671646 53.2083147523758  
61.5300817099814

Clorf57 191.291480830946 275.673080691335 459.182372959714  
180.128769312512 189.678033532012 232.147792636393 252.487015579489  
274.02972772427 218.165286111397 232.238647125646 208.7739716139  
266.323732730581

Clorf58 37.3463875295726 43.2649781354792 45.2313723727673  
38.9534635879195 49.5666074434383 39.8455060654531 38.4005795891396  
44.8997235283254 43.9450023643394 44.7958122466628 39.4410515050885  
47.3992733452821

Clorf59 324.506136847875 246.820301517765 220.192552354287  
180.873540853324 413.620123676085 129.190555260332 344.44626908553  
258.589426470951 355.00914527669 153.812414753676 143.443713592074  
174.148714092395

Clorf61 61.9504984796308 32.8881500803623 34.4716904283753  
40.3180310664156 36.6354013629791 35.5158505219112 40.9157352260901  
39.7509165247419 42.8036731479932 37.0320432433314 40.3452320167286  
30.7315474127249

Clorf62 43.1805016690297 42.6939394537076 41.1742244762318  
41.8778873678551 41.6806984441849 41.4508241771315 42.7431359850339  
40.6663433492193 38.7298222155532 42.5664883002833 38.5252456306656  
46.4499258373233

Clorf63 90.8236750745974 95.6662924228901 135.997802304719  
101.403739410832 149.19643034862 67.3469281984384 63.6695826053997



110.666686474986 93.310557793228 70.4895190282848 70.3381994440425  
103.376225272425  
Clorf64 41.2424637338424 38.9338521051669 47.2055133646385  
44.6905691366696 43.4544762830742 37.9951997351435 39.7576136507593  
37.9837233601316 42.5406888281114 37.7315666632629 44.553780984244  
44.7401523707775  
Clorf65 38.2083710281545 34.2618170189676 43.0971787292711  
42.4580504587581 40.6723334103791 37.2686490268265 41.8315602975157  
42.2577689927563 42.992884918158 39.3698811593364 43.0016969050339  
38.9496515344837  
Clorf66 188.61489831342 195.765247956108 320.812668695531  
127.596368103014 284.575587310164 136.190823415283 226.090904721424  
133.060894083935 228.703786640132 236.536058101486 264.88963894526  
198.257381933305  
Clorf67 43.7585538437696 47.087835967892 44.0451487108213  
43.1847628331565 53.6907197364586 46.8954576545929 39.4600924554505  
45.7476095696859 55.9423752286714 41.1222709786153 42.911855821602  
40.5703581862752  
Clorf69 53.4921736109774 54.113533179847 54.9944485073259  
58.5406981871153 56.2305155589239 68.9562915755919 47.1345949868029  
55.421880601441 52.4539007817929 57.4665857273093 52.7817052791259  
51.4308501933893  
Clorf70 43.3638918705225 34.15544299189 43.8495248991589  
42.6913548400127 41.5668884168669 44.7804080899431 41.253645578517  
39.5466975353131 32.4931776430014 42.6793753550854 42.357910063876  
42.357910063876  
Clorf71 187.733278812798 218.531478946522 264.263104842911  
345.084002073846 198.54718783437 276.214079735778 194.570513601724  
201.427008153788 210.768576894328 270.922452389109 327.024556075244  
283.643027929014  
Clorf74 62.9952378379206 55.2893984191264 65.5820437889838  
55.0604256312495 75.9909523932333 45.4882438975269 56.9320717885002  
67.0904616289706 63.8740412329753 62.8201270538435 51.2318935933116  
51.9447450229707  
Clorf75 46.8954576545929 38.0226905622357 39.9101908547397  
38.5252456306656 36.8059561571675 37.7000400506818 46.0228732507872  
46.5717043290731 40.7847110517594 42.4594149893798 46.824299585607  
38.1421709520616  
Clorf76 45.0985088502363 51.1740855632044 53.6837370963602  
61.7502624458447 55.3100442506299 50.9724155054821 50.2016912396771  
61.3864512710242 52.7512110769042 52.6879797806876 50.8826620053386  
53.655233033193  
Clorf77 308.568617575909 368.162822151919 327.631923082696  
223.826005691932 335.655540947167 207.245428311682 494.231747291283  
378.358853591082 330.241189572237 207.380865650247 246.313146942736  
281.452208033175  
Clorf83 77.3752541676627 70.1238785863433 62.0008474085033  
67.8978240198575 87.1109435144663 75.2735539010032 77.118454956956  
62.5528124447176 70.0801020070064 116.441764463618 93.4144098590192  
90.9361642101537  
Clorf84 41.1928222537953 43.387539499126 43.1746360109207  
44.9370339275041 41.2740822675592 44.0399598874356 43.760806942409  
42.7431359850339 41.863927676552 45.8471859855979 43.5710871617107  
42.1957516560122

Clorf85 614.088027946471 374.167501183341 842.82310025167  
777.854349637516 867.856842601788 340.429325650126 514.853892585612  
340.812638857273 299.524171071613 445.421601813221 363.602775933416  
268.265540230814

Clorf86 171.386815652277 188.943404504867 230.486681581762  
189.890451486324 343.262403838579 233.00902546331 271.478148993789  
210.880198736298 232.591262307238 179.285390561592 213.261004438127  
168.225699005719

Clorf87 41.6354649482853 37.7598032934773 45.4634652319753  
46.6849259108754 43.4544762830742 41.9543948167375 46.6267962186599  
40.2382908228517 40.3662560853635 42.8936990772838 42.9634662926872  
39.9519547348106

Clorf88 44.5798743103596 48.2220547806679 41.2679739649179  
45.505885458784 43.2484996523549 48.6621527194963 44.5390641547628  
44.7044140979108 41.7627910693483 41.5804111566887 49.1495645678651  
62.7669079605627

Clorf89 45.5758521267508 49.6841415268611 48.7039705048129  
39.5050383901884 44.7829632472754 49.8472708021525 42.8684958525042  
58.676230030835 53.4604353973381 52.3304586399695 69.3645322033576  
56.0477607422828

Clorf9 36.0551493501805 42.0546888913836 39.4916414839923  
38.4571887275378 40.2062851265091 39.0648733099061 42.9176765336717  
37.1781720867518 38.5583217392131 43.0156099182214 40.547835538778  
41.5536168238478

Clorf91 56.0836516733215 52.7493349111555 74.9113162056974  
45.1151758109609 53.1884505015411 42.2114134935898 53.1884505015411  
52.0042367882776 51.2776048338 60.4369223102493 56.233217375698  
54.0374522273907

Clorf92 41.8409927585705 42.0709558258414 40.931294690669  
39.066284740632 38.3561682218911 43.2805590023412 35.9894133432376  
37.86982638952 45.3756389170606 39.2623423164488 43.0016969050339  
41.3481355128089

Clorf94 42.8036731479932 40.7952353240579 37.8386378737561  
38.8495095797881 40.9950639693255 43.5752393599169 39.7576136507593  
42.2577689927563 40.4997186069494 43.2988017098387 41.1638563416981  
45.0985088502363

Clorf95 34.5886782974123 36.9994058279362 37.0642268327439  
37.1894304543751 36.08956004634 31.1150868775826 32.7676164492555  
43.6434576713809 39.3750969348308 38.528621456378 38.079222289614  
40.5703581862752

Clorf96 41.4508241771315 41.9894412416874 45.8844325913247  
45.0798408927912 44.9936360641969 40.9506062495231 44.3440839686558  
54.9919060580109 49.1940901905636 43.844855336215 45.5707650534259  
40.1700117452801

Clorf97 67.5361056077111 151.936097714553 249.101015988111  
109.144663527001 61.1216330559316 68.3799828461475 88.1413320312949  
110.52925781809 102.322851896214 75.7991766454243 83.4465817617201  
75.7464604972652

Clorf99 40.9558083259517 39.0894172982439 40.7620472083159  
41.0219290963778 43.844855336215 38.2293008890613 35.6056062164318  
39.8016018354453 41.7233690251839 40.4136535208406 42.2618615571566  
38.9834959368496

C1QA 110.048921728774 96.981661155293 117.556281726503 199.687268345276  
87.6178717341967 236.595286890677 66.5422130374814 111.714563124738  
51.1055541075029 77.775644509079 51.3103617600342 93.2319962015465  
C1QB 633.385474385877 570.997661726825 539.32996290794 1094.91235708087  
538.716947884528 1634.61795848352 382.190644764853 494.162646055732  
78.2393202422664 192.564048264712 235.544416908354 744.762787024945  
C1QBP 569.966632625157 1345.37091574015 826.490051619826 432.355300448283  
1050.05355467301 578.311131274653 1016.13142851085 418.410951118141  
680.837950890159 328.080879084015 408.739953606815 700.477686061791  
C1QC 618.892379887961 466.935292808402 435.901460958456 746.550225537883  
392.622487173359 1418.94307844471 346.200944964577 557.979646421047  
85.3086977427271 225.389113475883 217.533011278692 603.480973260738  
C1QL1 42.6036491382658 51.0175677516029 43.5710871617107 39.3750969348308  
53.0419743379342 49.7458652239071 45.4799270968969 44.293922970134  
42.0621425894624 48.8623729374733 63.1566669782858 45.0035308952466  
C1QL2 36.1232327599945 39.0894172982439 45.989212296035 40.8681871019812  
44.147557390293 51.8103411703261 38.1793598983615 42.5435283762933  
47.27543600687 42.6793753550854 46.5650556481721 41.9430737035925  
C1QL3 43.2135791259317 38.7578265341627 41.785676764591 37.8442841690502  
39.4693871570028 44.0399598874356 42.22763273471 39.5954353681031  
41.074824727477 40.7063426028871 42.4162492820012 41.863927676552  
C1QL4 39.3709357615493 36.7976562409506 40.1985790927248 40.9607305725196  
39.9697332660833 37.9951997351435 39.0458123429605 43.9366081640576  
35.9645119596869 40.8049408996274 41.7272875295469 37.2810767789306  
C1QTNF1 217.575115287224 63.5519501251416 76.5053813427296  
163.62024333166 62.588825192561 91.0526311350893 46.7704450730477  
138.26207427245 46.0679399375659 50.2016912396771 69.1072548732529  
65.9476039189301  
C1QTNF2 45.3872406432794 47.087835967892 37.6557714476853  
46.8954576545929 40.2449343247539 46.263826584899 42.1607322031054  
44.0390019242862 47.0804681460898 39.6719190054379 38.4689132737495  
43.7672102682067  
C1QTNF3 67.3269632644926 43.4396866157171 43.0971787292711  
47.2740099216972 39.8114752099365 83.4465817617201 42.8684958525042  
41.4061152929154 37.2810767789306 50.007830364606 45.0589947942306  
42.3152792870779  
C1QTNF4 43.0930293831497 43.7644428186265 45.989212296035  
39.9697332660833 40.5710637884029 63.3612993417558 36.5352572191451  
37.9837233601316 57.4777075615651 46.441301934328 47.9942520395434  
44.5432192783161  
C1QTNF5 482.5816387921 138.418964807714 202.360546931172  
183.918927595056 155.050936910986 185.703644892356 65.3694267397114  
136.332339821167 59.2566572428546 103.968071466212 178.4681248137  
98.9017950719795  
C1QTNF6 156.088284999883 66.6199412368667 56.9280216270272  
71.2168693013526 68.2585858486846 38.486220880314 50.3519150282938  
52.8297102061403 66.3863814740963 54.4825201506931 49.81481191219  
49.1786207920603  
C1QTNF7 48.9906383294199 49.5443425465542 47.0940613507321  
42.6913548400127 46.3150221024046 112.039388952208 42.357910063876  
50.0526763693329 36.3649677956953 80.3915591207869 66.8188271427672  
55.5712957590038  
C1QTNF8 43.2724556187214 40.4359177791566 42.3536549114165  
41.1886975241176 34.7018263647985 44.5544727111028 36.8369172900902

38.2782436497441 49.0986627051784 42.3606390470387 42.0750889188255  
42.7782216342806  
C1QTNF9 43.3638918705225 37.8217989841918 37.5597671487621  
34.5425384901279 42.4864576619427 48.0350549043063 39.0458123429605  
38.2782436497441 34.5633623842083 34.6720534245631 41.0050831223107  
37.1747156131306  
C1R 265.667557678228 135.323750661937 70.2141759405882 167.653939596625  
150.852183189276 679.309039810384 58.691436315511 89.6670947876322  
73.640198455128 91.9185612536409 116.195366065932 153.42135363926  
C1RL 152.17335005192 166.847053797281 152.294357984689 214.51120218554  
96.8490167966217 134.646159826262 159.571799428131 122.292794686468  
173.013258797349 154.707548614663 138.637058021129 200.790001763897  
C1S 878.863554510943 190.647389246848 85.3718124658316 422.474427987338  
248.691595276298 994.015710537746 53.7423898357583 282.961489041903  
54.3458391089652 411.114836576804 415.364456363434 466.454993547103  
C2 205.772128732705 118.752208441493 133.981674663494 145.936763882526  
59.9326265577462 109.468741823602 114.755820699611 91.5258329186709  
157.568088397305 63.197604174872 58.4816190076338 64.531467526747  
C2orf100 385.675278463448 182.551901102169 325.083760277008  
362.788520130059 229.188779190649 260.15500351311 92.3034609409756  
429.576301511638 76.1869593072029 270.600852806342 616.912306849151  
287.689260887067  
C2orf103 55.6268253440479 48.8584917918986 44.1452943804044  
86.6411972262415 42.4864576619427 44.2607789091176 45.223075311113  
43.4544762830742 44.3440839686558 44.4652605017595 41.4508241771315  
40.3691324547049  
C2orf106 43.5710871617107 38.1835938174625 44.1452943804044  
46.1074305700679 44.0451487108213 42.8598805316863 49.4573631027613  
43.0930293831497 43.3744503319109 43.5627649099623 42.7775752471711  
42.6758568421347  
C2orf107 44.1294459089314 44.5152708955623 45.1899271235974  
57.6511495792664 51.3103617600342 41.7627910693483 45.6042625176633  
47.5439485437351 47.3158504988956 43.8943892311541 46.4753015651202  
44.9734311311394  
C2orf108 242.190059393491 255.884444464408 142.769349424534  
126.911056987607 179.064697219173 226.804294585045 234.615033303459  
185.312851727212 160.853643241489 282.115786635657 235.544416908354  
238.746837986347  
C2orf11 651.795139128843 547.888464549389 300.732955139561  
349.371668774717 381.613092202209 331.935072199058 600.007191467065  
336.390195295291 447.448900931272 683.75696650704 533.468347491982  
454.939614583134  
C2orf111 244.089971761037 196.17328008185 145.335751135441  
532.581631305218 273.070365538675 308.568617575909 293.755623192857  
327.238337722366 242.080992016235 277.5073518536 247.04098109003  
325.769076169162  
C2orf112 36.0144420013819 36.6968906669565 33.6816578730693  
33.5578650644246 36.7356360093603 34.7983399096627 33.3231576795423  
35.2642250366721 33.6902293666089 31.8890957468737 35.6970528713709  
32.0636251428594  
C2orf114 43.6706764143908 57.0875538213735 77.3367966395554  
39.853175885492 48.0234896130991 45.3882138838137 43.8206425661746  
44.5029690493211 52.5772854102326 39.4710743516517 41.8168470823451  
47.6938628797168

C20orf116 355.423376744934 446.757901018137 404.86512250958  
298.670959394883 575.863848923457 324.320137371059 548.966115135286  
203.010958724293 340.311633794489 256.071638089438 357.668448180268  
365.459728613746

C20orf117 93.299474822664 48.9800181621986 49.6872467499977  
46.6986977330569 57.2960245538881 79.0304119352941 88.2568398791731  
88.5706300816555 58.4598072919688 79.1649337367773 72.1090339831747  
66.5539062525344

C20orf118 43.9309845324767 46.4385386401326 42.0621425894624  
41.0726336841311 44.8897737954573 60.2083550387718 43.8206425661746  
45.4757965005055 43.9450023643394 42.8936990772838 47.2134341420411  
44.2527566343661

C20orf12 46.0023068797812 51.6060290544385 50.3950981988762  
45.8844325913247 55.9283039581662 45.4882438975269 49.1067959632109  
51.2623287419357 43.9450023643394 50.0564735608363 52.3761286517985  
53.1182952086284

C20orf123 37.1485601150873 44.4411734611229 37.8386378737561  
41.5464765641928 39.1650142708257 41.9543948167375 40.9157352260901  
38.745552403895 34.5633623842083 38.2069499294002 44.0409178714232  
37.0953622406687

C20orf127 58.1868359012515 44.7829632472754 42.640829914102  
75.7666827480067 61.954674965065 88.7605288058249 41.253645578517  
49.3880946790306 51.6731332961917 52.0999467564713 47.299647867533  
51.6660481331154

C20orf132 41.7397731376692 40.4003119241613 43.0016969050339  
42.1607322031054 39.3667161654772 41.0582900711341 41.1818632392526  
43.3729486804084 41.3803269429468 45.8424887733913 42.4580504587581  
40.3330033416496

C20orf133 43.4626049853157 45.0115870036541 47.0940613507321  
43.3078542962968 45.4751076037511 38.2293008890613 48.1747307200218  
39.1652965788406 43.4656637536244 41.1222709786153 45.6348103033479  
43.4709415392696

C20orf134 50.1533437545239 54.8979897528792 52.1242102345408  
46.8954576545929 50.3713170502557 40.7616966228404 59.6780848951767  
62.9922928277769 96.9051967257119 54.8979897528792 51.4413099192899  
46.4499258373233

C20orf135 42.6036491382658 37.8217989841918 37.7384958256497  
39.066284740632 38.0598374201407 39.6251842352088 41.0381860307445  
40.4359177791566 38.8271346375425 40.8970401536578 39.8184668132023  
43.4709415392696

C20orf141 66.8544766980562 40.8880530359822 40.4882741869718  
42.9358255168086 48.3814421939888 40.650742261428 45.8980298854198  
45.3872406432794 49.8304479381623 36.8059561571675 45.2265319826548  
42.2577689927563

C20orf142 41.7397731376692 45.2556760873335 40.5734458834617  
46.614092935749 39.4693871570028 45.0882356578404 41.0381860307445  
47.3791873993182 42.8036731479932 42.1622837416589 44.7114813656401  
38.4330755397458

C20orf144 44.1294459089314 34.3715326040967 39.7411455670172  
37.4223289687135 38.1644569189523 39.4953494583071 38.2933870238743  
36.5393857306744 35.4332080966594 35.195364621675 39.6403089864678  
39.7411455670172

C20orf149 97.3929166450379 155.099281008688 96.577572948724  
49.7350276169552 83.6438735616921 125.642081865992 197.325473090277

169.425386468707 166.834334710682 118.726647822102 123.768417863139  
127.486023318527  
C20orf151 42.8036731479932 41.8848959280916 37.1643693306382  
41.8778873678551 39.6535880152834 38.6414316877471 55.2088411137193  
36.1375121409002 40.4220196471124 40.5090849993014 45.1432412071268  
38.2350720635382  
C20orf152 37.55264801907 37.6383530120621 39.1799070031819  
39.7411455670172 38.0598374201407 35.314469458379 40.3302268293707  
41.9315419791594 34.9428206949566 41.5435611403119 41.7272875295469  
43.6753843488695  
C20orf160 66.3095900379311 76.6936010119768 114.488672372067  
96.9476136220382 58.2780916793348 119.333788465158 51.0013344286851  
63.9110569727542 51.0062122023297 58.115198353247 81.5678694264684  
61.9036392303558  
C20orf165 36.4564050256915 36.3110701990588 39.5450079747895  
43.6726153508978 40.3452320167286 44.6524308640784 40.0052661202207  
38.956280281655 33.802253812079 42.2614524730856 36.5359455830388  
42.8864415494484  
C20orf166 43.0001432913058 35.4484652445078 39.5450079747895  
40.5484717678957 32.5318884330468 47.2927436772465 32.9962272670005  
34.4896350146096 43.8482802038826 37.7315666632629 37.7384958256497  
40.0557788909923  
C20orf173 42.7150227340364 41.8848959280916 45.4865173433646  
55.8709511400674 46.0977687311222 46.3715909653832 46.5650556481721  
41.2551966132486 41.3803269429468 50.3388505346542 43.5710871617107  
42.4607795638552  
C20orf175 46.263826584899 45.0905928998779 50.8303921211581  
51.3851157261451 50.3713170502557 48.5835484742456 56.9320717885002  
40.3357777530419 41.5635499110307 45.6868589181768 46.7386599624801  
46.1592873342534  
C20orf177 101.81885073944 230.927097824131 241.222680673439  
175.798140574991 150.43149196048 202.325629133577 131.955454394903  
88.9038123445083 82.0993943936197 107.122319086614 149.076166432567  
104.704892803169  
C20orf179 41.0608773166058 40.9731067463382 39.7411455670172  
37.29566077996 40.8873907150245 38.9378717994178 46.4388841354122  
37.7612949798895 43.8482802038826 36.5806287103157 41.2598458726002  
42.7782216342806  
C20orf185 40.5654775358427 42.3550738181144 45.6989664108554  
37.7469621225553 37.8679241954337 38.7340969861754 41.1507980856436  
37.1317006162938 37.9273653326866 41.1222709786153 37.6484782516569  
40.9683275553869  
C20orf186 47.4678477186801 36.9994058279362 44.2405728317107  
39.853175885492 35.3327761997046 34.3887641786747 41.4742337714895  
40.3357777530419 44.619512785899 41.3321861371202 38.6662194645633  
36.5474283500601  
C20orf191 103.252085427319 116.694275999729 159.571799428131  
101.560929859785 201.456613927613 121.682085315899 135.997802304719  
242.932905246176 97.5394336319916 146.15014824361 114.321083441061  
144.079981029616  
C20orf194 46.6882473842548 60.8259591514868 53.8441980932644  
47.9915414951747 51.8699412145606 61.6637436851405 47.6861474684326  
46.3224743127757 44.3440839686558 58.3285450269055 54.9765783642973  
57.6406584929274

C20orf195 61.9504984796308 49.6841415268611 48.0191002461099  
44.9370339275041 49.5666074434383 42.750861693377 80.354283778818  
61.130286531713 53.3932110698117 54.3554233228353 48.5292718280498  
57.934622029119

C20orf196 64.546412747238 56.3560498705517 71.3527183280827  
62.3936376596431 90.0942781313264 56.7429967489965 77.4046818339539  
54.9919060580109 62.4776210012906 106.527144354592 84.1112814779578  
67.0331844416938

C20orf197 41.5421429082231 44.7829632472754 37.8386378737561  
38.5252456306656 41.0885562160946 39.2248354955045 32.9962272670005  
38.6454098044474 42.9020321355927 38.528621456378 45.310660704531  
40.9683275553869

C20orf20 614.603743904512 347.908556198025 449.427251674566  
310.821299796803 755.852629128252 288.190015621249 523.031300344992  
475.008345432596 645.114504971255 461.394007153992 403.428042132639  
317.0659599072

C20orf200 40.2543341073001 40.148780650831 41.8751578329365  
42.9358255168086 46.3150221024046 50.0748292497578 44.4639405506967  
40.931294690669 42.4540072551568 49.0841460667818 46.4753015651202  
40.1700117452801

C20orf24 2004.94135236716 1485.68317899614 1319.32406112346  
1679.12630849964 2405.8635632802 1055.00793806075 3070.83113612925  
1291.71781703042 1723.37649434054 478.296779356592 693.056793637199  
929.862002014478

C20orf26 42.3433931248155 40.2493681589104 38.9790184198145  
42.8235313007746 45.4751076037511 48.4758590019384 41.8315602975157  
42.5435283762933 43.3744503319109 48.2596564318071 45.0589947942306  
44.9070250604284

C20orf27 104.335120306753 144.835567449189 130.184962393833  
110.112236384679 440.728435508514 281.201604778921 187.086662645246  
131.808634405319 122.642481894309 159.844078593375 160.425627898607  
116.17375251898

C20orf29 89.9580440276828 82.4362183543935 74.5886835786452  
108.991044950132 109.398472684587 78.6402083787251 126.63987648161  
54.720204938924 97.5394336319916 112.760972238512 92.6608453151206  
67.0331844416938

C20orf3 202.795613942391 169.031144318639 180.502282381416  
142.48688219605 241.31366702947 141.594428857706 151.451107406752  
164.529367656711 139.191263237202 120.381190859636 162.569762535436  
175.529493306927

C20orf30 742.726253630865 955.088515235485 825.558929673308  
693.727004855319 1330.19215036764 1173.47285626656 924.316085565917  
530.314249832491 554.551745559065 673.522667186915 652.480459437977  
1029.12917222294

C20orf38 51.1740855632044 43.5873188565519 41.6977706798234  
44.6905691366696 47.9128504683618 45.9266745571724 46.3057385979341  
50.9933795450314 44.1519466943185 43.844855336215 44.6286581923295  
41.2437378488025

C20orf39 151.175959542368 44.0409178714232 46.0727230219512  
56.6458456890715 46.0043807840705 51.1621379498014 43.0930293831497  
45.7476095696859 46.3203995372658 57.5713378330876 64.898351831341  
46.7182294568603

C20orf4 350.278532614563 200.174103125152 204.774090707986  
214.732968482214 256.675896425075 261.326713935356 337.842694716836

243.803668806533 236.727577348109 242.016748817428 235.075347885884  
199.501451042641  
C20orf43 838.974043046676 665.510487460287 818.290793784784  
1111.89793143647 766.027617496754 1090.86617066541 1099.52344340557  
997.492549573274 773.781266760336 1351.49940447914 1024.97546870349  
942.247437385029  
C20orf45 214.823948126294 404.356143472409 266.005181829441  
203.152852313746 361.57814355509 238.746837986347 346.530266177867  
317.127679512963 280.870472307893 113.994256868581 112.428734515811  
251.2365884576  
C20orf46 328.908952548641 376.749116251503 225.559405596065  
62.6048727240291 166.652850759559 53.9517841438975 94.1289383735162  
182.188883821722 138.362914843774 47.4767851750188 50.2203578628217  
75.032753683526  
C20orf51 45.0985088502363 41.9894412416874 45.3974838013476  
51.223859150798 48.3814421939888 42.2577689927563 43.1931731665131  
47.4740726032707 46.9739160257217 42.3606390470387 47.1477056711335  
43.9541718254769  
C20orf52 1119.61164710566 1323.73429724066 1259.2978319548  
1089.08276262641 1440.41726370246 1285.49870339222 2474.22199172028  
1401.46625360427 1145.59111340228 1134.52018899688 1033.99699402259  
1393.24135330226  
C20orf54 192.264432082651 59.8102324370568 66.0411740221276  
47.481302504066 64.193536444915 41.8613406887824 83.8811735017279  
94.9654919877791 57.404059248727 101.759714275976 107.646103699516  
74.1282220615085  
C20orf55 230.286815921497 199.604105066243 228.660261263355  
77.7973642829228 191.979759198021 74.6375749739389 206.261432452217  
147.405190988088 193.703214707909 228.499788774214 220.977092747428  
199.404836798715  
C20orf59 48.2910530887214 45.3486182278177 45.063792968927  
79.5838979704243 67.0163226819964 37.3799542961839 39.6535880152834  
47.0940613507321 40.9901805728485 38.2069499294002 35.046946054314  
40.3691324547049  
C20orf62 44.2350046179299 39.8695929627783 40.1985790927248  
39.9697332660833 38.1644569189523 39.2985791324641 33.5578650644246  
43.4544762830742 42.9020321355927 40.4136535208406 44.7114813656401  
40.8681871019812  
C20orf7 76.2738693944687 86.4114854104675 75.3580625318157  
75.1163398247735 109.758297200083 95.275072356529 98.6706537801886  
78.7450149191851 78.839411865787 123.868848519181 109.594402843796  
130.293915348934  
C20orf70 41.6354649482853 40.0527893189096 52.2132783757422  
37.1894304543751 34.0045980663271 42.357910063876 46.1634822993009  
44.8997235283254 37.9273653326866 38.745552403895 41.8168470823451  
44.0451487108213  
C20orf71 40.4261913313642 40.8880530359822 38.4428081526233  
42.357910063876 39.8238654968211 38.7658621977098 41.2040352443154  
42.1887890806988 40.2274522635576 37.8217989841918 44.7114813656401  
37.0390589468421  
C20orf72 192.058030454066 472.159979716705 381.31252208432  
249.704644191338 641.462632112151 178.608544676872 398.139730642919  
186.570670850819 208.410194427484 221.015209694864 244.435346243998  
233.577690223567



C20orf74 39.3100256336821 49.2560467081687 38.8417151851134  
34.2685957283626 42.4864576619427 39.266565827316 43.6753843488695  
47.8947595316832 38.1658452457336 37.3179578037963 38.6335676551747  
38.9834959368496

C20orf75 43.7585538437696 43.5182502375207 46.5650556481721  
44.265834798964 55.4030910454028 44.9896851005259 47.7390230243778  
38.079222289614 46.3203995372658 45.3530683538086 46.6442692119997  
41.3481355128089

C20orf77 39.5676051939342 43.1805016690297 36.769073068743  
42.0102671859606 38.6454098044474 43.6670755115848 42.0605906240248  
42.4580504587581 38.7298222155532 40.2112371512838 45.390192977585  
39.4490233720848

C20orf79 45.5758521267508 41.6466169548846 46.1653991089885  
44.265834798964 44.5668141895992 44.9896851005259 39.5496902678788  
39.853866204927 50.9010149857308 45.4614234442527 44.2925355984056  
37.3600014814388

C20orf82 125.62281563325 49.6841415268611 66.737740728688  
49.5424425850549 38.5512429290626 49.9699131196797 44.6032218589199  
87.1561568256908 50.5785738734431 46.325232414659 50.4740079109854  
49.1200355938198

C20orf85 44.7915315085948 42.5269793679335 50.0748292497578  
44.6905691366696 44.6834648302383 45.0882356578404 43.3262148375525  
49.5185112777773 50.7619345314571 43.1839109702714 43.0971787292711  
33.939263369489

C20orf86 44.0328992213727 40.4359177791566 43.401782064778  
43.8002456102021 41.7929491793697 40.7616966228404 34.4570158133896  
41.7419877611072 45.9227107476843 42.3606390470387 37.6484782516569  
32.6203270051744

C20orf91 42.7613994022988 41.0212349917651 41.8751578329365  
45.0017158586743 42.7982502551634 39.2985791324641 43.9450023643394  
43.1567024035183 42.846832824953 46.1390887492649 42.1537476443423  
42.934549734195

C20orf94 55.6268253440479 60.1685144469519 75.4317740345967  
72.2577390063259 66.1650385535549 54.9108046955355 71.3527183280827  
59.1107691694766 54.4059109100338 84.5913809068614 71.6849360818041  
72.3297091475814

C20orf95 49.6241203903354 43.3458769998118 44.5134109184888  
48.1662933382789 47.4548471240051 46.4648868771662 59.0457625163577  
45.9604707098953 45.1899271235974 45.1569741609597 44.6286581923295  
46.2625470410195

C20orf96 69.3418521417182 50.4022543872993 42.4580504587581  
41.7614975630362 63.686652234709 36.4986986135769 41.8315602975157  
54.720204938924 41.2870505273664 49.4006068471301 51.0492389286271  
44.3521099857368

C21orf100 38.5007204246293 37.5469247328848 47.2055133646385  
38.2041059863839 48.0234896130991 43.9724628401189 41.9393838138203  
52.5098795466615 46.0106098064475 45.6868589181768 41.9908237694988  
45.7562276914441

C21orf114 36.2496364442264 41.2598458726002 40.931294690669  
42.4580504587581 41.7929491793697 41.6590564937735 41.4742337714895  
39.0620487644635 39.5806465938526 44.7958122466628 43.0971787292711  
39.3575468494941

C21orf119 64.668912004173 60.6548851977964 66.4079972657486  
65.084620579901 74.9113162056974 56.4819802857598 85.1227830573138

57.3286965007828 66.4251023257203 58.3813211109331 51.7538628098347  
55.1804535845496  
C21orf121 44.8914371498528 41.9894412416874 39.3709357615493  
45.5869891570251 40.9950639693255 41.6590564937735 48.6395795163502  
53.6210959113222 40.9901805728485 50.22432299342 41.5421429082231  
39.9519547348106  
C21orf122 43.6706764143908 43.7644428186265 46.3411353377615  
46.8954576545929 43.1252272136667 59.7009992986607 40.1235656101329  
39.7509165247419 54.0192060888782 56.8201201798712 55.0404566626821  
48.27609330316  
C21orf123 33.5994525227062 38.5252456306656 34.3633615460307  
41.7614975630362 39.4693871570028 34.0045980663271 39.0458123429605  
36.2539950294089 37.9273653326866 39.6719190054379 36.3390947880186  
40.4639532172338  
C21orf124 88.5140510969737 50.9643363406241 65.2670315837785  
52.6947911480086 72.828269171954 47.0027453663546 62.0404348860702  
55.3122077514658 65.1424206085551 61.1851254827343 63.2684764441521  
62.5447504571181  
C21orf125 44.1294459089314 45.9266745571724 48.4890615340603  
43.5627649099623 43.7517118200398 36.9060997041453 46.8613212048981  
44.0390019242862 52.5772854102326 43.401782064778 39.4410515050885  
39.8497227447888  
C21orf128 46.8141313516997 46.8236022402545 49.2041300973417  
43.9282059368202 50.7615314686244 51.4931742685391 53.1884505015411  
53.838484549134 49.2879849674517 50.22432299342 45.310660704531  
42.6758568421347  
C21orf129 42.8036731479932 51.119812302881 61.841867306916  
44.265834798964 65.5029051840465 43.2805590023412 44.2166118829877  
55.421880601441 52.9482338979681 56.5379973844443 47.9942520395434  
47.8931773060789  
C21orf2 78.9028182143923 77.4046818339539 104.351256270039  
128.157032116902 71.7263663921367 148.467977704907 87.455991111513  
140.030757545662 75.9909523932333 187.21383075601 169.561107057293  
132.508880040274  
C21orf24 3490.63949257581 1999.21832626916 2280.42953098693  
2365.73772015255 1529.52516575545 1335.4111951034 2440.77408185413  
4235.59743465057 1509.04753111016 3776.54943917367 3653.59181300011  
2598.78910128081  
C21orf29 36.7356360093603 43.9421822132391 41.3366779545815  
37.5382094267692 43.6587492470348 43.6670755115848 43.4544762830742  
37.9837233601316 40.4220196471124 43.1839109702714 38.6662194645633  
34.1509644696334  
C21orf33 214.537530518962 316.185342210304 464.671881584567  
263.44529683749 616.912306849151 370.330147221688 407.336051853854  
350.978524278048 423.254211470935 401.679080975109 384.280434953152  
341.535750991033  
C21orf34 51.688369435871 38.2795150354677 42.3962308437248  
44.0895090772372 40.5372008011901 90.9010016862442 36.7356360093603  
46.0633179231318 39.044540595942 68.9766943946607 58.8559455338355  
48.0010635382918  
C21orf37 48.1125722136997 46.8954576545929 51.223859150798  
48.1662933382789 41.9842695818285 49.3172204533818 40.7910160811527  
44.5029690493211 55.2114969675545 46.2286164776607 47.8284278211109  
45.5800840647989

C21orf41 39.5234709385294 40.716553247236 41.3366779545815  
38.889943614258 40.7376840028647 40.8091178323174 40.745874931373  
41.0752399035779 41.627892303206 39.2057863854896 41.134180463103  
37.6200174008473

C21orf42 42.1537476443423 41.2598458726002 48.0191002461099  
51.0175677516029 45.8051846088552 39.132725377815 40.6750540874299  
42.7431359850339 39.2809305246091 43.401782064778 40.6373400186325  
43.3744503319109

C21orf45 53.1309801459151 60.4646208319121 50.9519768764673  
41.8291484190524 85.0017995689256 43.1826328292558 53.1884505015411  
55.6904617926772 66.603126065489 46.325232414659 45.7792335738285  
45.0035308952466

C21orf49 41.6354649482853 33.939263369489 42.3536549114165  
40.646702696033 33.4316681623175 38.6414316877471 35.4623691645629  
40.047314525032 42.0621425894624 39.5637454855233 45.2265319826548  
34.0382693188794

C21orf51 68.3928560299063 66.1595900891671 83.0262409967927  
66.1448688879431 91.6777754418002 94.4999269932618 67.1209520838357  
60.0502421545569 89.3868257841517 72.834275688835 69.7215372275927  
91.8935361535002

C21orf55 4916.82166008511 2568.97574985073 3602.30252142918  
3428.74022048394 2456.86796652313 1442.72006787259 3502.80810319252  
5811.22276358172 2365.73772015255 4898.89844391477 4259.50675863393  
3502.80810319252

C21orf56 47.5647821785529 64.0096843640535 137.176719695561  
70.0402992940342 211.829374574045 102.471939526704 41.3594868055879  
68.1311562787361 41.3803269429468 65.0928075335306 97.7965639721152  
46.6397391251762

C21orf57 123.04622719856 108.806649898122 187.189412320761  
150.529917336161 186.891912776245 140.866324039667 171.176393131741  
107.741669334989 182.643498505575 140.063595285844 114.918205718649  
114.623641209561

C21orf58 49.8304479381623 50.5070012045444 60.6080172588224  
41.3567204694281 61.0246305235631 45.0882356578404 67.1477341610979  
56.4557243125318 62.7605715573218 46.2819623896574 44.2560775855603  
44.1861590259178

C21orf59 120.980558571109 162.106596527489 171.992427227088  
95.3070802596041 240.58403560014 130.177232923004 203.651890041185  
152.679927202674 129.820909990346 90.716460692818 100.663054866186  
116.434267173815

C21orf62 40.9558083259517 37.7384958256497 37.4642807402741  
39.066284740632 44.5668141895992 43.8582747295766 39.8695929627783  
38.956280281655 35.5220586859301 38.8507804383261 40.2649309204478  
45.6692241948108

C21orf63 68.0700069295224 50.543526404059 59.7483827511172  
87.9098670472958 59.4830424460714 199.294913752704 46.5650556481721  
73.746472097049 61.1022920882065 166.572463787763 150.082905944963  
161.526970033915

C21orf66 92.5391033814713 115.221134337342 127.986477405999  
81.5135916455124 159.485978728 84.5354986509039 135.592113666246  
107.348865210074 100.326655761429 95.9075629352341 90.8831233784641  
91.6876038082112

C21orf67 41.8409927585705 41.554942319225 38.1421709520616  
39.066284740632 43.7517118200398 37.2686490268265 39.8695929627783

42.4580504587581 42.6366765186182 37.5343260962758 38.956280281655  
32.1545709776983  
C21orf69 36.9060997041453 39.0894172982439 34.4716904283753  
37.0732977341185 49.32293280121 37.7000400506818 37.6036146841933  
58.4200819624972 40.9901805728485 39.8873706855774 40.8225507267584  
39.7411455670172  
C21orf7 57.4376528157926 90.3691010312535 95.0738959950301  
74.6159297822533 73.5541045639348 45.6129956328415 55.9276266345493  
46.4672637826582 70.5699797830702 65.5349012839562 58.7389869173495  
65.4435809676217  
C21orf70 59.9546218258435 62.9391937505369 67.3469281984384  
63.6334154351075 127.246625628593 77.2218991550552 109.811921160228  
68.580705761277 73.3042538589134 57.3562426592112 71.136135376296  
66.6118713143653  
C21orf74 40.6559419616644 41.3610369241157 37.7384958256497  
39.7411455670172 39.6535880152834 43.9724628401189 46.4388841354122  
41.8417024632349 41.3803269429468 42.1622837416589 40.4504608195666  
41.7575097298927  
C21orf77 41.9407041937973 36.89524015739 40.4882741869718  
44.550322123994 40.2449343247539 39.7394181011603 40.3302268293707  
41.1575777497576 40.2274522635576 42.1622837416589 48.2050207071554  
43.5738557773903  
C21orf81 40.5158867964016 71.8156159183499 89.3168921945222  
43.2427390263564 40.6373400186325 40.800866389165 42.629412460409  
44.081163104701 55.2336859873958 191.668846959973 135.490875023792  
114.755820699611  
C21orf84 36.6480005877129 41.2598458726002 33.1559412791294  
35.8472302065546 38.5512429290626 39.0266821712099 37.2892641289258  
41.6466169548846 39.6609238036815 42.0621425894624 39.9070785037411  
37.9607839934735  
C21orf86 40.6559419616644 41.6466169548846 34.8956628705329  
40.646702696033 40.4639532172338 43.3785777889265 40.5585676679482  
36.9355798143571 45.0017158586743 47.3791873993182 40.6373400186325  
42.7782216342806  
C21orf87 36.1232327599945 33.8237407699472 32.5418171758086  
34.9849896310235 34.3633615460307 39.5581166303303 36.4098694708483  
35.1224289925572 44.2142581488029 41.0057887014368 37.9230440150891  
39.5792604499113  
C21orf88 44.3355304829989 39.8695929627783 39.8299340037009  
39.9697332660833 39.1650142708257 45.4882438975269 39.7576136507593  
36.2539950294089 44.2607789091176 33.8984830800739 44.3763859390287  
34.5633623842083  
C21orf90 44.7044140979108 43.9421822132391 40.7620472083159  
42.5664883002833 59.0965219753805 42.9695585740813 37.830876898596  
41.4508241771315 41.7627910693483 43.401782064778 43.4709415392696  
36.1647506311964  
C21orf91 50.4260283682427 54.0461131287999 58.465017287283  
67.1209520838357 55.3718910891548 48.1591264215184 58.4262160879174  
57.5640428227111 59.5929655877036 49.2317401696588 47.8988096575648  
51.7330492465443  
C21orf93 42.7150227340364 50.0425298550559 48.9944486068347  
50.2163892855092 43.7517118200398 44.3648993568405 43.5627649099623  
50.5070012045444 43.7630587657205 47.3791873993182 46.0905079010237  
46.3411353377615

C21orf94 41.3387790895716 41.8848959280916 40.4070046183108  
48.665578118898 41.8806343997257 42.157627240486 46.5650556481721  
42.5435283762933 38.7298222155532 41.5435611403119 45.310660704531  
42.9887069977696

C22orf13 754.700295017212 451.711598030737 466.695081390256  
475.621740714165 385.594118191769 562.531738167208 1115.27580736237  
529.210992541911 486.487366153374 497.591040004541 476.653723741096  
444.169882251299

C22orf15 45.6517320730042 44.5884811528117 48.1997158668729  
43.5627649099623 54.6820069269589 49.641159251878 45.223075311113  
46.8954576545929 44.619512785899 51.8412522234186 49.8393069675192  
39.4490233720848

C22orf23 51.2851682978581 56.463481075522 52.2132783757422  
60.4646208319121 51.1368583672022 44.5544727111028 45.8980298854198  
57.1362071277099 51.6731332961917 61.4569050766419 53.9517841438975  
51.4308501933893

C22orf25 232.440458525975 95.0738959950301 94.3953345963359  
134.394743648475 65.3019328668633 114.769498252688 84.260633540656  
143.653706909456 78.8250642061439 92.9043863423147 93.9956276432715  
79.9447969637409

C22orf26 46.1673159982664 38.2263227947189 40.5734458834617  
41.0726336841311 50.3713170502557 40.4359177791566 49.3854238365325  
43.6434576713809 44.5303781239209 38.2069499294002 44.2142581488029  
48.0350549043063

C22orf28 379.933650669101 294.006023678979 320.038347979923  
309.994784298282 255.636379050741 318.768560912915 327.283431584541  
318.234214341679 367.451332073134 335.167786298149 272.022473793857  
279.782392390288

C22orf29 133.823107212467 108.734392572981 83.0262409967927  
66.7750249658122 93.4726264307041 81.5782824513693 68.878562323012  
97.7415824971555 85.3718124658316 106.418690759491 83.1184264089873  
81.2068428211497

C22orf30 40.7609952437622 39.8695929627783 37.8386378737561  
42.357910063876 42.3685136297603 37.8102105794655 42.2577689927563  
44.2159020605784 38.3418933808844 42.5664883002833 41.2598458726002  
34.9138625012006

C22orf31 39.266565827316 38.5252456306656 36.5474283500601  
40.5484717678957 40.4639532172338 40.7616966228404 49.2546642180676  
32.8834169462007 48.2123120250343 36.8059561571675 35.860430241131  
43.9541718254769

C22orf32 54.2648201582657 69.734208465775 71.3527183280827  
75.2475238554276 67.3568864741196 88.3503153240018 75.7342400123505  
64.4156641487994 65.8622973953004 124.986782737446 105.277476070937  
87.4273245333478

C22orf33 33.0463640202858 42.1607322031054 36.4564050256915  
39.9697332660833 36.9702228618069 38.8336427948187 39.1539892144371  
39.3709357615493 29.4159269895179 38.528621456378 32.406093465115  
38.6454098044474

C22orf34 34.4896350146096 40.7952353240579 40.931294690669  
38.4208429103799 71.5345397102823 36.0306975524309 41.1507980856436  
37.9837233601316 39.7537274655115 36.4651112441576 41.2598458726002  
42.357910063876

C22orf36 80.4479092568961 57.0082102559228 43.6670755115848  
62.3936376596431 58.9875400392427 127.789065386943 110.223625398261

59.1107691694766 69.0037087543684 102.136265168978 113.169111095305  
72.1090339831747  
C22orf39 69.7442393277127 55.0009147092272 72.4202724008052  
78.1583955490018 60.6400800519777 103.569150754726 57.8870110456492  
54.0507720792049 91.5370872909881 65.5349012839562 62.5036823572932  
68.2309359831273  
C22orf40 56.8534370691413 56.7826399116207 52.8483158143741  
50.1185085888209 61.0468099710416 66.0069448981947 60.4593810615882  
47.834436078111 54.4059109100338 61.4569050766419 56.7888691338261  
51.9447450229707  
C22orf9 44.3754281580557 48.4711252009937 44.696023817801  
52.1201052574162 56.1671440556142 50.2513819310656 43.2645805835667  
45.8095171770165 44.7804080899431 45.4614234442527 44.6286581923295  
52.2216613535546  
C2CD2 95.5530572805104 146.658116519622 190.403032965372 89.7554896946341  
264.88963894526 128.219615202232 195.836475280084 179.47783529  
167.537023543498 247.416016413788 219.918644151214 204.171339006867  
C2CD2L 56.8168526942685 61.2108152457954 54.6820069269589  
70.506090074243 57.9161791762225 56.8505380943422 61.2183034191703  
73.362936710475 47.3791873993182 50.0564735608363 50.4740079109854  
43.1805016690297  
C2CD3 45.8108990837624 43.5182502375207 47.3861758958576 42.357910063876  
50.5110359971301 43.6670755115848 48.9826868640753 57.037639245179  
41.3803269429468 41.0057887014368 46.0905079010237 45.9693232070002  
C2orf13 44.7915315085948 41.3610369241157 41.6079958749402  
46.614092935749 42.269054475455 40.650742261428 41.8315602975157  
40.7311497914871 40.4997186069494 46.325232414659 45.0589947942306  
40.9683275553869  
C2orf15 74.3135387703106 115.321592104747 75.561262816077  
47.8164193292842 106.951862149262 45.1873487463472 111.367789538268  
118.93749473833 96.0838701986116 57.165971310746 61.2529834995512  
75.7140064167134  
C2orf16 43.4626049853157 46.2286164776607 38.3166554965434  
38.0958223740111 32.9756367838345 37.7000400506818 41.9393838138203  
43.4544762830742 38.2215591930186 41.7405682794166 43.4709415392696  
38.3291713594599  
C2orf18 129.785929766258 84.9182861692273 93.6591201235745  
99.2432911346944 92.3034609409756 94.2678678253657 86.9185256838836  
107.682738819549 108.27606179864 82.475816811779 95.39134217438  
97.3929166450379  
C2orf19 35.7012997405508 38.1312950900467 37.3687900733549  
37.0732977341185 37.8679241954337 42.4580504587581 38.0598374201407  
37.1317006162938 40.3316153483289 33.5412189543102 39.9899430628542  
36.2582325396375  
C2orf21 39.3709357615493 41.3277288245157 43.917817324545  
41.4273122914951 39.8114752099365 40.8970401536578 46.3611042575528  
41.6466169548846 43.6670755115848 48.5374448344297 39.8184668132023  
40.6614700944853  
C2orf24 159.937192675974 90.3691010312535 100.057155418659  
143.304938314706 106.454367084321 118.410983614453 117.260454792593  
203.759116151774 127.232160404726 292.065366215278 207.18510695093  
133.541341560868  
C2orf25 523.679443405512 1151.25293766167 747.975233849989  
623.574706535278 615.011590811277 614.807633538557 442.99540222483

388.132295362791 487.065758294354 290.524288545599 315.696895080135  
621.012072500314  
C2orf27 47.7267190613906 42.3550738181144 36.8730514568925  
39.6292788039793 38.1644569189523 39.8455060654531 40.2154497375715  
36.5393857306744 37.2810767789306 35.6208308220005 36.8282383070068  
38.6454098044474  
C2orf28 816.746599467159 722.514380928291 788.950470077369  
716.754656773542 718.414652618295 982.428740433235 709.730555484551  
875.787532301293 716.434968700383 752.837247653926 776.670493028756  
884.036280777358  
C2orf29 1783.87583818834 981.039763059681 939.453799186397  
476.653723741096 1291.71781703042 427.540236966999 792.880882528835  
1307.19925493293 999.13039066242 1083.50383916482 900.517711546397  
759.184121753305  
C2orf3 35.6111578834671 32.7800533388945 37.6557714476853  
43.5627649099623 50.7615314686244 37.9951997351435 37.3799542961839  
37.86982638952 35.1155486926999 37.1275334308172 37.9230440150891  
36.7762265039864  
C2orf30 398.049525642349 413.918050849658 384.522115820048  
583.053232396803 253.333114749013 321.949943388959 242.58992925232  
310.706520144173 267.427827956058 337.013669560645 306.533241954966  
394.764369100963  
C2orf32 73.7133884699889 59.2643906275025 69.0503036666628  
92.8026641003757 63.1443731864055 193.043344611355 48.6395795163502  
54.6067620335514 47.27543600687 86.2118355769367 89.5887648181505  
92.6545309624315  
C2orf33 121.744701580607 140.559370165331 111.735319884512  
112.854520785284 124.051109959228 202.627009037401 87.2351169088172  
97.2750076101755 140.51841571801 114.796237914478 125.891602778425  
160.755701876741  
C2orf34 68.8698243753339 82.4362183543935 105.052418151358  
50.0526763693329 104.914715637173 84.5913809068614 103.118579484715  
181.873969432903 90.8109585999257 88.8568707880669 102.993620677265  
98.9017950719795  
C2orf37 49.7188990489616 50.6229884142872 55.9459886217809  
38.2041059863839 47.5647821785529 48.0350549043063 48.1747307200218  
57.5640428227111 41.1742244762318 51.2318935933116 51.1483696410762  
55.1804535845496  
C2orf39 41.8409927585705 39.7835513496873 36.1042012504758  
40.3180310664156 38.2496050953547 40.8634043028528 40.2154497375715  
36.7460922671619 44.1519466943185 41.0057887014368 37.3687900733549  
41.6550823405646  
C2orf40 44.1294459089314 37.8217989841918 39.5450079747895  
43.1847628331565 43.4544762830742 635.52621743309 36.8369172900902  
47.9942520395434 33.9456837661864 320.889609846069 248.012529897462  
225.420624458188  
C2orf42 117.074650076861 94.7008981904016 132.369828264246  
117.071280682786 103.792424865682 122.758873982957 77.4046818339539  
107.427186954956 104.626873082138 138.765621737736 135.706144105357  
120.679433440203  
C2orf43 84.0388582916959 93.5045354990096 82.1344514651393  
82.2766822827861 104.388288863224 75.8976034525022 131.097521229971  
96.0654949568324 95.9298109273155 87.7918574811458 83.1874704625702  
123.27141431776

C2orf44 103.561100886469 67.1299518044849 62.5610562594275  
67.8978240198575 93.1238695478498 75.2735539010032 120.401643722713  
145.791398829369 58.8201021345225 94.233414682323 102.121491187437  
100.567309348016

C2orf47 298.420882349382 383.371300272181 326.70962514228  
208.097209050425 397.798003824167 188.008141649466 270.662475158799  
308.280127837858 315.487514440864 131.779333469955 144.546897317106  
189.083059081845

C2orf48 53.4921736109774 46.4861258030402 58.112348043634  
42.5664883002833 53.8260140375214 46.4648868771662 62.0404348860702  
175.193752938517 53.7442594289333 39.2623423164488 43.7585538437696  
44.8372404608604

C2orf49 89.4747568145717 69.1414574152997 86.6186787663248  
82.5279746006378 117.260454792593 84.7113556042844 91.8733417805775  
96.332996264667 96.3232257371077 70.194061829681 63.7963501146829  
91.3112603277315

C2orf50 39.266565827316 44.0409178714232 41.8751578329365  
38.3166554965434 39.1650142708257 35.4142595025086 41.9393838138203  
48.9826868640753 36.3649677956953 41.0057887014368 42.0750889188255  
45.4799270968969

C2orf51 42.9104454767916 37.5469247328848 41.437237454134  
40.1804147506786 36.7356360093603 37.4782441311626 35.7055410599146  
35.9023742468744 34.2973261206803 40.7063426028871 40.3452320167286  
42.7782216342806

C2orf52 42.5534565507139 39.6123051184545 41.6079958749402  
40.8681871019812 40.7779767565889 42.750861693377 43.7585538437696  
44.5029690493211 46.1634822993009 46.7646877499666 40.9683275553869  
40.716553247236

C2orf53 42.442231667357 38.3322849790657 37.9482157381008  
43.074472921841 44.5668141895992 43.9724628401189 40.2154497375715  
48.4670130605028 42.6366765186182 42.4594149893798 44.7114813656401  
40.6614700944853

C2orf54 38.385865183581 35.8227939208521 36.4564050256915  
38.6414316877471 31.3942305191093 37.8102105794655 37.9430145836712  
35.4526946152955 42.1594905198929 34.4875013487777 42.4580504587581  
34.2141875904985

C2orf56 94.1289383735162 99.7361599442168 119.681745926474  
96.8620230524393 112.990752518897 93.8361140725228 126.500059295217  
194.435776102991 99.9896394343368 78.9420136903401 76.375769561992  
108.57858133896

C2orf57 43.7585538437696 45.0905928998779 40.6737160001291  
40.646702696033 39.859345745831 42.0574848021044 40.7910160811527  
48.1591264215184 40.7847110517594 42.0621425894624 38.2795150354677  
36.064718696392

C2orf58 39.8662795144616 43.5182502375207 35.0970060242246  
40.4359177791566 35.6434124419782 43.2805590023412 40.6750540874299  
40.831207953647 36.197424053556 40.8970401536578 42.357910063876  
34.2141875904985

C2orf60 38.1169703906207 42.4493032770053 40.301483914446  
40.3180310664156 43.3332476888305 37.8102105794655 40.3302268293707  
39.0620487644635 41.7627910693483 38.745552403895 37.6484782516569  
42.9887069977696

C2orf61 39.7576136507593 38.9338521051669 36.3604951341921  
41.4273122914951 37.8679241954337 30.0771630269067 32.9962272670005



39.3709357615493 34.8552366193358 39.2623423164488 43.3085358214154  
35.6427313468066  
C2orf62 41.8409927585705 38.8336427948187 39.6451483836089  
54.2886483704949 39.9697332660833 41.6590564937735 37.7136011474903  
42.6450179841129 40.8970401536578 41.7405682794166 37.9230440150891  
39.4490233720848  
C2orf63 42.9104454767916 49.2050538150106 48.1997158668729  
39.5050383901884 38.6454098044474 37.4782441311626 37.6036146841933  
54.5125550937898 44.3440839686558 43.2988017098387 54.4825201506931  
57.6860752168769  
C2orf64 140.598583034034 138.82907142482 121.737071786167  
87.4850071876743 148.99515914482 169.723009455614 138.436822676252  
110.440072569721 159.973746908596 161.326580647514 160.962078065068  
209.986313475002  
C2orf65 51.7607563002005 53.2841144999258 46.4569566520107  
50.7046706880325 43.9450023643394 54.8265655909623 47.7390230243778  
48.7814131120945 44.7058233759912 46.6598879466655 46.7386599624801  
44.3521099857368  
C2orf66 39.266565827316 43.3458769998118 37.4642807402741  
42.5664883002833 36.8059561571675 42.157627240486 38.8417151851134  
40.3357777530419 42.0621425894624 43.7303813515864 43.401782064778  
40.2669497398702  
C2orf67 37.9387791625384 46.0023068797812 39.0775870687758  
42.1273928203021 41.467005949568 42.8598805316863 40.9157352260901  
39.3709357615493 43.3744503319109 39.0648733099061 46.0095710163378  
41.4508241771315  
C2orf7 91.3967044940546 69.3106426188075 83.7159102306394  
70.2541961995753 93.6591201235745 99.3956523785983 64.232967574797  
95.2915739972533 148.467977704907 105.828093778276 103.561100886469  
83.7019398654324  
C2orf73 39.8662795144616 39.0894172982439 34.3633615460307  
35.7674462337723 39.5595233162192 36.6271061451613 38.0598374201407  
42.8482181313226 38.9834959368496 38.745552403895 37.1059647239814  
36.8690774823319  
C2orf76 75.0704619826557 53.7332797903102 57.423873475544  
74.2429851177794 51.7983110178095 59.7009992986607 56.2181240696479  
70.18107651423 67.4304134449444 66.8026147385682 56.8436081694537  
75.4053820110486  
C2orf77 37.6397652536077 43.683792219729 38.6005272730664  
41.8778873678551 38.5512429290626 41.159706131351 41.4742337714895  
40.931294690669 43.5669306063196 41.1222709786153 45.7328341667151  
42.1537476443423  
C2orf78 40.6559419616644 44.5884811528117 39.7411455670172  
50.8567345921473 52.0583273941813 42.4580504587581 43.8206425661746  
47.2009420656854 45.3756389170606 47.8207974930031 43.0971787292711  
43.4709415392696  
C2orf79 84.9756044280631 128.005663945917 105.814959179397  
101.708164294697 81.0259717888094 73.688423848106 148.944852825695  
113.655306804539 138.23147386089 98.9657264176664 93.5045354990096  
96.8555197062122  
C2orf83 43.1805016690297 35.5310164682026 43.3085358214154  
42.5664883002833 45.9104478407175 37.3799542961839 40.1235656101329  
45.9604707098953 38.4344387289956 43.7303813515864 43.0016969050339  
45.6692241948108

C3 48.8704059222613 49.015238049903 58.6736679311765 61.6608323085662  
44.3557408297309 130.648278937122 40.4941260038116 41.8417024632349  
40.6503965580437 53.4109882045447 50.2750065554387 61.9882398986333  
C3AR1 64.1882546112044 50.543526404059 49.1067959632109 339.262360833465  
40.3452320167286 81.3978207813439 39.8695929627783 50.3082459161777  
38.8271346375425 44.8997235283254 38.3684202018524 44.0451487108213  
C3orf1 58.1868359012515 57.0082102559228 57.423873475544  
70.2541961995753 76.7820250461545 62.0660509811111 56.6537562775715  
62.105802634526 62.275808835675 72.42732668079 68.1992221684165  
56.6146179789815  
C3orf10 273.108672916862 413.067407579649 279.485290822376  
286.832539203237 468.98857415608 464.583498621466 298.282957415786  
259.127235335036 261.195021649777 293.649670545233 268.683528469759  
374.167501183341  
C3orf14 121.682085315899 127.2070318269 259.626847216881  
110.540953771795 204.318269745079 128.657014567195 278.303493506139  
176.057220407246 296.39460008432 87.5074297754031 99.0647786948132  
128.436305192918  
C3orf15 48.8333989709933 51.2405397507224 41.437237454134  
41.5464765641928 42.1650127805175 76.5888466260562 70.7238101239421  
104.089998273812 50.2223403889892 69.6511571901941 66.5063354430003  
48.5123041297835  
C3orf17 82.8095009455738 80.1461294346211 71.940968073473  
86.6411972262415 61.954674965065 76.1205714556592 62.801431502597  
55.7341433378734 87.6018870099686 67.591570323687 61.6084234634424  
80.4404044229341  
C3orf18 46.5549623118323 38.6414316877471 49.2041300973417  
46.614092935749 41.6806984441849 50.2163892855092 37.7136011474903  
39.2672712041774 44.4395580493118 48.7414853386615 51.2318935933116  
39.3575468494941  
C3orf19 165.775214685061 323.048740324895 267.170081805168  
198.497745548245 288.190015621249 233.201890340549 350.365107642944  
316.373650015333 245.356135592468 398.43592055172 357.347859577591  
223.267781866783  
C3orf20 44.7044140979108 32.5482839399637 44.6032218589199  
40.3180310664156 43.6587492470348 34.8956628705329 35.0305278582179  
37.9837233601316 34.226171989766 37.0320432433314 42.357910063876  
36.064718696392  
C3orf21 230.879083362388 134.407474121421 160.336517310154  
117.3417887148 272.022473793857 93.1067450332473 181.545493080363  
170.475212920685 258.30549459038 148.358988653522 119.528720998614  
103.75895351937  
C3orf22 50.4872122867759 39.8695929627783 40.301483914446  
43.6726153508978 45.9104478407175 46.0364000143537 54.0170817319522  
39.2672712041774 47.798305839406 40.4136535208406 42.911855821602  
44.2527566343661  
C3orf23 41.0970259989281 60.8608693323868 58.7065473526185  
46.4555908533915 67.5047089908724 59.4153120842154 51.0459299480813  
44.64770889737 59.9354531144375 44.5324600042493 46.9886864457762  
53.5643281930979  
C3orf24 40.8091178323174 42.2900457798748 40.148780650831  
40.4967168818294 41.3755760434934 37.842873463785 39.6158343667921  
44.9631458622215 37.6383530120621 40.2615278292875 42.3413611855132  
39.1553169409075

C3orf25 48.8333989709933 43.4396866157171 43.3085358214154  
41.3027031037343 41.0885562160946 39.3841861812262 48.9826868640753  
47.2864663693787 41.863927676552 42.785429206422 43.7585538437696  
40.4639532172338

C3orf26 122.316617618658 131.766252431636 99.3448096967314  
126.69706456173 313.711588658312 206.676666936979 198.922575188741  
199.660904693786 152.792457231813 92.4534854832186 105.277476070937  
140.961217055867

C3orf27 36.4564050256915 38.9338521051669 37.6557714476853  
41.4273122914951 40.0599807618105 43.7630587657205 40.7910160811527  
34.9580369221164 37.9273653326866 39.3698811593364 37.8372168909583  
42.1537476443423

C3orf30 44.9370339275041 47.2299678280724 43.5710871617107  
44.6131679221578 43.7783560914188 43.3269087731399 48.4099370357307  
40.8833572570383 45.9227107476843 42.785429206422 43.3085358214154  
43.5420658412177

C3orf31 149.260740603715 257.194689822426 209.497482517298  
134.394743648475 273.645674189546 153.42135363926 245.960009147234  
323.576613035353 208.30969642805 148.781721594419 140.245630405973  
176.839214683647

C3orf32 43.2724556187214 45.1694246393676 39.7411455670172  
40.8681871019812 40.7779767565889 43.8582747295766 38.4005795891396  
45.642304356051 51.1055541075029 38.6454098044474 49.532546810992  
45.5800840647989

C3orf33 39.266565827316 39.6123051184545 40.0998167098057  
35.7674462337723 45.9104478407175 46.8954576545929 46.9929836306816  
43.4544762830742 44.4395580493118 56.8201201798712 44.4688999098904  
43.0930293831497

C3orf34 2206.44541412808 1377.24483375075 1541.9572099378  
1917.90025587049 987.427672417105 926.61614755153 1864.63057767867  
2448.64580552439 1065.70206468134 2978.46032143413 2830.73694055758  
2024.4791883541

C3orf35 40.5320714850602 38.7578265341627 42.108130037421  
38.6835649080278 45.1137938810047 39.6251842352088 43.5004520034498  
41.8813257103492 40.1719219196935 43.128936937037 37.8844698547804  
41.863927676552

C3orf36 45.7356815244513 55.0897019602305 57.2107492415265  
59.6153684374766 39.3667161654772 43.1826328292558 40.2154497375715  
46.9986083378817 46.7760357462635 45.6868589181768 43.5710871617107  
45.4799270968969

C3orf37 112.551747307723 100.535211780514 152.395295329633  
134.258351436533 173.11353027932 112.768270540409 242.339375770778  
133.151333210366 169.061093538895 151.775928080246 133.244526666651  
130.775349446374

C3orf38 91.8088250889427 124.803597244786 120.771048750176  
119.502912878938 162.569762535436 117.598001907902 97.299696284253  
84.1639779987105 99.9057667432209 61.3149617644002 67.5963845975985  
85.8154958329408

C3orf39 97.9401338178996 100.616027485975 95.0026207727863  
82.5279746006378 197.011675186182 131.451150955309 143.152895211088  
111.714563124738 111.096799408676 127.567860003773 114.78317743597  
103.607345835114

C3orf41 37.2474303302343 34.6306468196142 42.0621425894624  
38.745552403895 43.2484996523549 48.5835484742456 41.0381860307445

38.6454098044474 43.2761454096265 37.920964499903 43.401782064778  
38.745552403895  
C3orf42 40.6062943725118 44.4411734611229 41.3708420203838  
44.3440839686558 47.8697093824642 38.4741160538511 42.1372626664516  
42.7965563818112 40.1738310955128 44.6918600441328 41.3234441859498  
41.9741368971524  
C3orf44 34.6977013306396 37.2810767789306 38.6005272730664  
39.6292788039793 38.1644569189523 40.7616966228404 40.3302268293707  
40.4359177791566 40.8970401536578 39.4710743516517 34.4716904283753  
33.939263369489  
C3orf45 35.8208542506595 38.8336427948187 47.3861758958576  
35.7674462337723 38.1644569189523 40.9506062495231 38.941855825269  
37.33030683349 43.7630587657205 44.7958122466628 41.8168470823451  
40.6614700944853  
C3orf46 39.7576136507593 45.4143854024453 41.3366779545815  
38.9534635879195 38.3561682218911 39.6251842352088 38.4005795891396  
39.5466975353131 39.2809305246091 36.6893251782922 37.9946685306274  
35.8429598823818  
C3orf47 42.1537476443423 36.6968906669565 41.785676764591  
48.665578118898 38.745552403895 47.5733603903505 39.2533668167483  
44.4031868028216 38.2215591930186 38.745552403895 45.9104478407175  
42.357910063876  
C3orf48 38.7537364570873 41.4508241771315 41.785676764591  
38.4208429103799 45.9104478407175 40.040778349137 51.1541843174981  
42.0494116081998 42.5406888281114 39.5637454855233 42.4580504587581  
39.4490233720848  
C3orf52 72.4094549259929 117.074650076861 103.14577985944  
46.8954576545929 106.527144354592 64.5187138759372 96.2959923858457  
111.573111498905 96.8141712830545 112.551747307723 174.752830194939  
132.37539586883  
C3orf54 60.7371790125714 159.99819920335 204.63343271995  
79.1000897258245 148.333778341005 94.3953345963359 105.945216149549  
45.0972184964705 205.854666205308 267.85990321012 173.150885069619  
138.486962379511  
C3orf55 39.8662795144616 39.7835513496873 43.3085358214154  
46.4555908533915 48.3814421939888 42.357910063876 45.4799270968969  
43.3262148375525 36.8127605061228 43.2988017098387 40.6373400186325  
39.0536056496869  
C3orf56 41.9407041937973 41.9894412416874 37.1643693306382  
44.6905691366696 35.9058393060637 42.157627240486 44.7255207589606  
41.8417024632349 40.4220196471124 42.3606390470387 38.8507804383261  
39.0536056496869  
C3orf57 38.6454098044474 48.0010635382918 52.4234283832574  
43.1847628331565 85.2849531543957 47.0504142893738 75.2101993995344  
210.50519205965 46.4569566520107 47.8207974930031 57.2674335547631  
118.806070800059  
C3orf58 93.0714382925187 104.740168626646 77.268323196327  
107.111886993156 312.648013979436 115.441414762268 160.360785581153  
135.829530518199 132.684895918889 165.942795019496 172.433936159136  
134.763105070421  
C3orf59 87.8746766762445 96.6359641162026 73.4962349716902  
188.713487905549 104.072423445726 94.8884063433735 145.526972410673  
272.475108279834 71.5327770882433 139.645717741863 125.221639689345  
128.635811501506

C3orf60 182.80711310964 263.125290391542 262.9072085191  
267.608189207303 236.910422092851 264.263104842911 361.023743912857  
247.723546145775 235.101442092497 236.791729190996 224.509915754308  
245.996655628334

C3orf62 49.2595762436995 51.6060290544385 56.3471340054074  
73.5834042105313 55.6069214673486 50.3245489035833 61.2183034191703  
52.1788489555942 57.9713749600418 51.6778366958973 56.233217375698  
64.7963220317334

C3orf63 67.8774399765179 73.0385284042351 121.120217132666  
89.7554896946341 83.9387217886961 114.965999573704 71.3527183280827  
56.4779645313958 69.779139490544 72.42732668079 75.3075812535743  
68.7753456118815

C3orf64 66.0069448981947 91.3475300950304 99.5125674355716  
69.9214859673839 74.6474346708746 95.1000239210194 65.8986841086198  
57.7125861123012 71.0211264570699 97.7620313090597 91.4990733687068  
104.796373568883

C3orf65 40.0988483617359 37.8685585043426 36.064718696392  
37.1894304543751 37.2567512265363 40.0766543123257 40.0052661202207  
41.7419877611072 37.1820543575123 37.8592299544905 39.3086414047188  
38.195965820384

C3orf67 43.4626049853157 39.2907645923217 35.7105247506212  
36.7892997857376 41.7929491793697 35.6125439901743 36.634024014558  
41.3506832276112 60.4837400912239 55.6865353018811 41.9908237694988  
40.1700117452801

C3orf70 52.9609836781499 54.7855575216687 51.0539624358342  
47.6687908290818 58.9875400392427 118.49449420132 51.7714254834195  
40.2382908228517 51.6731332961917 108.709630036731 85.2598847559951  
107.799236230743

C3orf72 75.5751205142867 47.1332119496722 42.8270038153139  
50.5310598656998 55.1563703466328 48.5835484742456 53.3111230705754  
60.6706478075023 47.0804681460898 51.1169368198437 42.5426057453993  
51.7833333848627

C4A 30.1388203764747 37.3634897565502 28.5895665533366 35.9521941716188  
36.8059561571675 36.4986986135769 34.6720534245631 33.5578650644246  
30.8360322325222 36.2435874904689 35.4386677371439 32.3796054199032

C4B 38.0089018744739 42.1607322031054 34.5718473203083 37.1894304543751  
45.4751076037511 39.9397419279057 38.4005795891396 37.1317006162938  
48.8067321016961 42.8936990772838 40.0766543123257 39.2469742642337

C4BPA 92.4896666046729 41.4508241771315 35.6139301508335 42.6913548400127  
42.1650127805175 37.2686490268265 43.0930293831497 44.7044140979108  
31.859589438824 44.8997235283254 36.7283081422707 38.0452862258803

C4BPB 48.0570064280814 39.5050383901884 47.5673419710251 40.2455972565968  
40.7273974755431 42.0016830644258 46.2448677480802 38.2782436497441  
57.5430365699386 38.3501188844251 41.5421429082231 39.0536056496869

C4orf11 36.3649677956953 33.4967065724734 37.9482157381008  
42.6913548400127 42.0709558258414 40.9506062495231 38.6243997507646  
48.5681478665796 39.5806465938526 38.3092241935352 40.1742127891824  
39.7411455670172

C4orf12 36.9060997041453 39.6995529770239 40.4070046183108  
45.0798408927912 46.1804647841331 42.0574848021044 37.4772922422734  
43.3262148375525 40.3316153483289 39.7835513496873 40.0766543123257  
44.3521099857368

C4orf14 184.989940464859 311.985010273921 344.44626908553  
203.759116151774 440.93348620369 294.908371819124 229.035497774884

163.097224522154 288.642294976 205.086228002776 216.744244428166  
249.220968977184  
C4orf15 54.3554233228353 56.3560498705517 52.4485219671976  
57.4595416719581 54.6820069269589 59.7009992986607 65.7873990226533  
49.9332280449549 59.7483827511172 67.1278109419819 69.7215372275927  
58.112348043634  
C4orf16 44.7520317855773 47.9665737016961 44.3648993568405  
45.9441733841041 50.4463723277824 46.1513019317765 44.5390641547628  
49.2019743609873 47.0055981216687 42.1317134987795 45.1778228816327  
46.201352759435  
C4orf17 43.5710871617107 35.6434124419782 39.4710743516517  
34.4382958501338 43.3332476888305 46.0364000143537 42.629412460409  
39.853866204927 39.1790517315259 40.8049408996274 38.3684202018524  
39.8497227447888  
C4orf18 159.440571032045 85.1544284060549 78.7921230549822  
179.756604242873 70.3213394542625 153.279284223069 85.3227908896318  
65.0234989597222 73.1215732923523 98.5746416750459 88.7461361855771  
99.2749350936362  
C4orf19 65.2735059202804 96.038271786159 64.7318794662958  
41.1886975241176 207.540972220982 64.7905331739366 84.0691608193405  
117.215323339475 111.291087721139 87.7918574811458 66.737740728688  
67.9850517608624  
C4orf21 42.6036491382658 46.29198852834 34.2890785915814  
36.9912468186322 38.4540849632254 36.3845892764084 39.5496902678788  
37.9837233601316 44.1519466943185 32.1260264272477 38.4689132737495  
40.4639532172338  
C4orf22 41.7397731376692 40.4359177791566 42.0621425894624  
38.745552403895 50.0580547772867 44.2607789091176 42.1607322031054  
45.9604707098953 37.6383530120621 43.844855336215 37.6484782516569  
41.1554481567603  
C4orf23 46.441301934328 51.2405397507224 50.1520209533747  
64.6945454069792 53.1884505015411 49.2050538150106 58.6431245059655  
48.7814131120945 51.7833333848627 50.7855742231932 46.6442692119997  
51.8251888604386  
C4orf26 44.1294459089314 37.920964499903 41.6079958749402  
38.4208429103799 34.1686574241133 43.3785777889265 39.3585350448719  
40.931294690669 37.9273653326866 41.2276963324981 39.8184668132023  
39.6352613956998  
C4orf27 114.979124960177 87.8681250426295 117.074650076861  
82.7394574977114 130.515102593803 135.567012693522 140.610918488396  
96.213791081731 127.232160404726 94.4129246851651 85.7732262204681  
126.838679504229  
C4orf28 42.2455707947223 40.6380495994768 47.9035532886869  
40.4359177791566 46.3150221024046 40.040778349137 32.7676164492555  
38.745552403895 47.6195009345747 49.0841460667818 41.9083581529276  
37.6557714476853  
C4orf29 57.2960245538881 77.3367966395554 91.7844162703214  
78.0020909283414 84.3040298294164 55.6242009731278 66.0350709576651  
58.2043532960091 77.2413564369342 95.4072431786073 110.589130460258  
101.699631771662  
C4orf30 139.191263237202 219.702703529829 148.906660152784  
143.13189461696 203.559653641339 202.957014793417 207.513604688444  
165.820230766206 186.450759425396 158.637047990511 200.860376997315  
126.115065200084

C4orf31 44.436995101921 43.9421822132391 34.3633615460307  
36.4564050256915 56.1186281675573 43.6670755115848 33.4316681623175  
80.7067505750848 40.5912213523345 75.0665411373616 184.536327776767  
85.6964911093755

C4orf32 47.8249696958403 43.3016395799961 47.646800205189  
48.856176220627 50.0173461659833 53.8461734834857 44.1407835440612  
41.9820792173615 46.4861258030402 51.7343702554597 54.6603683143597  
56.796621176582

C4orf33 48.6621527194963 77.518381991736 79.0962508551502  
69.6511571901941 57.0504111569238 53.8461734834857 59.3549213146532  
59.7744650739434 97.1271615802556 64.2174369755376 62.1796792097014  
53.2046867327331

C4orf34 264.600870859012 545.514314651238 601.611039798626  
352.600793906035 146.046179302584 455.223217772744 221.22852405053  
566.77872642437 350.192608372742 615.011590811277 734.143790759359  
741.908952472992

C4orf35 40.5654775358427 39.3999056968598 41.9666541498638  
39.1706564265495 46.4343327861696 42.6575535390785 36.634024014558  
38.8495095797881 40.5912213523345 42.1622837416589 41.0808257270221  
39.7411455670172

C4orf36 52.109723558511 52.1967540852276 59.5444359507702  
51.3851157261451 49.0828761839116 53.4466111440611 62.6885730386156  
55.1933004802607 61.8824218975538 52.0999467564713 48.2050207071554  
56.1875519519366

C4orf37 42.2455707947223 43.3972849968032 43.7085219318425  
38.2599935139101 41.9397336249742 42.5660695551615 39.3999056968598  
37.7217193704498 46.0633179231318 40.6022003765153 42.3413611855132  
40.9149601380325

C4orf38 46.0920218698606 41.3610369241157 38.1421709520616  
40.5484717678957 39.3667161654772 40.1428591998404 42.9803717121865  
36.0306975524309 42.4540072551568 37.2089297656361 52.1788489555942  
45.7562276914441

C4orf39 40.4639532172338 44.1239711172417 43.9450023643394  
48.9944486068347 47.3172462673426 46.263826584899 49.540449125788  
40.7311497914871 50.2223403889892 46.0119912782855 45.6348103033479  
49.7336769474446

C4orf41 126.528654651607 121.135772395548 136.011269830829  
118.587373377593 137.081911344143 137.878417253635 121.300283654541  
102.717305041352 110.599131324937 112.469702446962 115.676508349703  
127.986477405999

C4orf42 49.540449125788 45.1694246393676 44.6032218589199  
45.5869891570251 44.4489662507893 50.3245489035833 42.2577689927563  
44.5029690493211 42.4540072551568 44.571915452417 42.7275315121163  
46.3411353377615

C4orf43 42.3433931248155 46.8954576545929 41.1367478979484  
48.665578118898 38.2496050953547 43.5752393599169 41.253645578517  
46.0633179231318 45.8325181856483 40.1179210534118 43.9450023643394  
44.1452943804044

C4orf44 42.2618615571566 44.4639405506967 41.2365089689635  
43.6726153508978 39.6123051184545 40.8634043028528 41.9741368971524  
42.5435283762933 40.1738310955128 42.5193208629123 41.8168470823451  
42.1537476443423

C4orf45 36.7356360093603 41.7337506166619 37.5597671487621  
46.614092935749 44.147557390293 37.3799542961839 44.8643898647322

39.7509165247419 42.992884918158 36.1550293353654 41.9908237694988  
43.1805016690297  
C4orf6 45.9090659324223 44.6918600441328 43.0971787292711  
45.7397504535169 43.1252272136667 45.0882356578404 48.8319884367456  
43.4544762830742 44.3440839686558 43.4885245598939 43.6629145624937  
44.8372404608604  
C4orf7 35.8208542506595 66.3026572113793 38.9790184198145  
225.827961496781 37.5556299264699 37.3799542961839 44.3440839686558  
44.8997235283254 42.5406888281114 44.8997235283254 47.299647867533  
40.3691324547049  
C4orf8 74.3135387703106 94.6300022444815 83.1874704625702  
82.2766822827861 78.0077300979911 82.7269382676336 100.650129064849  
90.9010016862442 117.457080110677 114.796237914478 126.204310123186  
100.049462976601  
C5 72.8120269375546 53.7332797903102 76.1493261430901 79.4528447794527  
56.359578588344 115.659933682533 87.8746766762445 83.9236799134394  
63.3694113050568 108.788705797019 91.8414653633828 72.5346469941833  
C5AR1 108.493693862509 75.41408189458 72.6731815563159 1070.52156560795  
75.6471706262645 240.139560726101 275.928723831899 109.241121384212  
38.6322728994674 43.6033221838149 46.6442692119997 57.445796273665  
C5orf13 877.673009984357 191.503068870249 352.843053667822  
232.516262874696 236.595286890677 198.15553991394 184.421617360366  
330.550018306903 87.7337304906377 190.592556065939 132.090336898032  
80.0381580139229  
C5orf15 740.423874031773 662.041552795049 957.682898193927  
521.546082699431 474.379113836506 423.608694638779 670.958499409833  
811.142611128461 742.726253630865 706.087945508248 751.953794043451  
583.915973546284  
C5orf20 44.8914371498528 59.3406363431414 45.310660704531  
88.3459116251233 45.6895223823001 43.6670755115848 40.9157352260901  
45.5581356216957 45.0017158586743 40.5090849993014 46.824299585607  
41.4508241771315  
C5orf21 138.100169316776 240.178571901813 263.125290391542  
213.345169940536 149.475318376458 383.190278161083 190.77754486426  
182.343696914747 168.883366756191 369.451882513347 282.646286144563  
311.1022748407  
C5orf22 47.5647821785529 54.0052948715814 55.7764940944098  
57.2856683017619 54.4586176399381 53.0290605707162 70.7238101239421  
53.838484549134 66.1448688879431 43.6033221838149 51.5822637582617  
48.9733758107788  
C5orf23 38.6454098044474 50.7487159427973 41.6079958749402  
41.4273122914951 43.3332476888305 41.6590564937735 38.4005795891396  
45.0972184964705 43.2761454096265 52.2256177934134 39.153226699662  
40.6614700944853  
C5orf24 54.5358897781765 59.5534127075228 67.8010199320754  
42.2496337895968 49.452985143568 67.4846787600629 55.4004611309636  
44.9977782988116 61.6839343510302 44.8997235283254 56.8436081694537  
62.0967404944031  
C5orf25 70.2541961995753 47.4740726032707 53.838484549134  
56.1780366332082 44.8351976221735 65.564930068976 58.6431245059655  
72.8378863017531 57.2716485658185 67.8233625051884 74.1425714439424  
62.58750768974  
C5orf28 770.715044136717 391.397318564183 470.231929311877  
677.481235695517 335.569876624791 295.127975044241 570.824732318332



1188.3486464341 308.841311505431 1105.00321488322 862.031722874406  
746.252816568691  
C5orf29 43.4626049853157 59.9682734755814 61.1076362129586  
206.791464145857 42.269054475455 76.331185787832 48.0283573444179  
47.0940613507321 41.863927676552 44.6918600441328 43.3085358214154  
48.4535991392809  
C5orf30 56.8168526942685 47.8400694856726 55.6865353018811  
51.7739270955254 48.1473938886239 51.4931742685391 92.3034609409756  
66.0303950772736 74.9179396623258 55.4037482627222 56.0477607422828  
53.840976437122  
C5orf32 307.922754395377 198.360449141425 130.925724760241  
559.9670724278 164.612971085488 229.926637466766 295.848968688724  
293.151956467056 313.660064080622 246.044674996861 376.453560620912  
837.959914510114  
C5orf33 50.379587451669 53.9275079525238 57.9279989359711  
52.3004056941891 62.588825192561 101.909225305064 85.2088054619229  
89.0275988550016 68.9038222450855 56.8201201798712 73.7873098190297  
61.356483470053  
C5orf34 49.9014504704021 52.8455400026194 54.1157382341041  
46.7577982595088 111.714563124738 61.2387559102636 91.3144101155547  
59.220967994972 61.2070368742244 51.6778366958973 49.6706535876636  
47.2862299990938  
C5orf35 63.3717459766798 77.4676205299631 86.0550457387351  
96.0770202999531 81.3759380182158 98.501431740607 91.116454717205  
52.7787010032051 101.708164294697 83.5069968129733 76.8713035584472  
70.18107651423  
C5orf36 40.018129854 40.2493681589104 39.5893773029164  
44.265834798964 39.4693871570028 38.861780967827 42.7431359850339  
38.6454098044474 38.3981095229401 42.8936990772838 40.1362682639916  
37.0431286518306  
C5orf37 86.6655289455628 142.863673914134 105.965906809429  
99.4184778430267 95.1131101630937 114.643475335002 111.558107942386  
79.2701322339022 124.44575078108 96.5102825310977 99.9752275166514  
79.5898953726467  
C5orf38 42.6036491382658 37.2810767789306 41.528370959196  
40.1804147506786 45.5809132232681 41.4508241771315 50.2016912396771  
46.695848687694 45.1899271235974 40.6022003765153 45.4799270968969  
46.917149434588  
C5orf39 94.1967497986791 98.4175422336425 109.144663527001  
155.018308238778 91.5258329186709 96.8783070574131 127.811684080184  
72.5835488194631 97.5394336319916 107.242476674629 102.471939526704  
89.1771576058145  
C5orf4 44.9896851005259 44.4772114267866 51.2776048338  
43.3078542962968 42.9090346219023 78.1132840562953 43.3262148375525  
43.0895173605825 43.6177016821274 83.8419777255838 68.7091708087448  
55.540888910486  
C5orf41 82.2266112813039 98.2280780221631 112.532906407663  
401.956364010068 77.7852875052734 260.426488908824 99.2341244350412  
117.948047796034 73.0970339739187 136.947616119439 185.191228931155  
154.386505379733  
C5orf42 44.4639405506967 44.066785003302 42.0621425894624  
42.1622837416589 42.3685136297603 42.9104454767916 42.8684958525042  
45.9604707098953 41.3803269429468 47.1785588364488 42.046575509735  
41.0226232127351

C5orf44 56.9360840563854 57.8005007012205 66.6332042895961  
43.367124590178 56.1186281675573 54.400905818898 43.5627649099623  
43.2551508830106 57.0301170427216 41.3641352453779 52.0583273941813  
58.0722340887264  
C5orf45 48.8333989709933 54.5027833453824 50.2869791217819  
51.849385316267 57.0504111569238 58.512477459583 52.8496345990125  
49.9951674107458 53.838484549134 53.3577647219133 52.9567386506107  
52.6151169127166  
C5orf46 91.31756001203 36.7976562409506 38.3166554965434  
52.5307002738469 40.5710637884029 41.159706131351 38.1793598983615  
39.0620487644635 40.0403898620771 43.7303813515864 35.860430241131  
35.9604262434141  
C5orf48 44.0328992213727 40.148780650831 41.1367478979484  
39.853175885492 36.9702228618069 38.2293008890613 44.7255207589606  
42.4580504587581 38.3418933808844 34.6720534245631 35.6970528713709  
41.0657892043496  
C5orf5 125.786923817078 137.955007835039 117.074650076861  
155.018308238778 115.132600341395 325.563540852801 90.1500004950245  
135.11808699414 179.47783529 446.902178094675 327.193250073326  
234.333935191237  
C6 43.0001432913058 44.5152708955623 36.6522278218553 43.074472921841  
37.7576900881741 95.0738959950301 48.4859552186772 41.2551966132486  
39.6609238036815 47.8207974930031 47.299647867533 42.57175366709  
C6orf1 62.5239209616027 50.3586212130973 54.000164292461  
57.0629653735694 55.0618818132967 49.2731519807085 46.3486551193976  
48.8467058855408 53.0756537912154 53.5993601965286 50.0577385875347  
58.9069025298754  
C6orf10 43.0001432913058 36.1232327599945 38.8775560911841  
43.8002456102021 41.2740822675592 38.1169703906207 44.2166118829877  
41.7419877611072 44.0519245668737 42.6793753550854 42.7275315121163  
41.7575097298927  
C6orf103 47.3791873993182 41.554942319225 45.2313723727673  
45.0798408927912 42.4864576619427 45.2852528185486 46.7100796279384  
46.0633179231318 45.2897806651929 40.1179210534118 43.3085358214154  
44.1452943804044  
C6orf105 169.970634268117 49.9547657591437 61.6878176260761  
89.9284109077375 54.2301964914419 59.5979861826984 120.721482177994  
67.9103729751746 59.5093038629766 49.8393069675192 56.1379957867124  
48.6037684272115  
C6orf106 106.620429405618 63.3357696118348 64.3312319756553  
90.6516730646251 78.1275793755619 72.0674952635945 100.386011517899  
79.8913276294876 83.8679756709676 93.955760127914 85.2598847559951  
82.2266112813039  
C6orf107 35.8208542506595 41.3610369241157 46.9040704638073  
38.0958223740111 55.3100442506299 40.8634043028528 42.7431359850339  
44.0390019242862 46.0106098064475 47.0055981216687 46.972521499515  
41.3481355128089  
C6orf108 511.067537752967 224.249210397247 261.929727465462  
254.639522735592 466.074595343541 276.399037769005 399.410299413602  
244.907057340556 409.312313055794 212.803471204964 256.215133513379  
211.279069257808  
C6orf111 204.130491885587 201.616017553422 318.369837408344  
219.291627770586 140.199798713912 190.703466372947 125.393232344778

146.133951379664 181.123652339134 234.675357616705 230.117814622646  
315.592187396219  
C6orf114 29.4486614241988 30.3554137634399 35.2838283525874  
37.5382094267692 34.9062568194127 31.4686555405126 34.6720534245631  
34.9580369221164 35.7973685350741 35.4990901121893 34.8383995317036  
35.7451401627836  
C6orf115 215.557210899786 140.648209468568 117.556281726503  
110.431464700539 123.433224929087 67.1729762600915 205.789533350801  
151.438409623226 99.2341244350412 91.4684013366068 72.842552380479  
110.860844149372  
C6orf117 44.7044140979108 69.2082505043031 244.736442646499  
55.6481366056639 47.2074332636566 41.4508241771315 116.311176407088  
57.445796273665 99.5192591352063 81.537796828766 63.0043412964216  
73.7335870746827  
C6orf118 39.7576136507593 44.2630383225933 41.0356368374708  
36.3604951341921 40.4639532172338 44.2607789091176 41.5817737564592  
49.6203214143464 40.9901805728485 48.7414853386615 45.9104478407175  
40.7704587752083  
C6orf12 39.7320564340365 46.3370338074996 45.063792968927  
40.3691324547049 40.148780650831 41.6590564937735 47.0874209746031  
43.1931731665131 46.4164127487052 50.1649089793069 41.4508241771315  
44.4951343330035  
C6orf120 49.3463416794995 55.8046062733709 52.3432130135266  
61.0845101400379 56.4685270445642 52.4351670989268 44.7255207589606  
45.0972184964705 49.641159251878 50.6486940895674 53.4088637045445  
58.6481644777552  
C6orf122 38.6454098044474 40.2493681589104 41.9666541498638  
39.9697332660833 42.269054475455 44.2607789091176 42.629412460409  
40.1474543172332 49.0986627051784 47.3791873993182 43.0971787292711  
43.5738557773903  
C6orf123 39.266565827316 42.6022652963326 41.785676764591  
42.1273928203021 38.9496515344837 48.260931742163 45.8980298854198  
40.3357777530419 41.863927676552 38.8507804383261 42.4580504587581  
39.6352613956998  
C6orf125 671.959673037066 319.248898194029 511.067537752967  
374.427492246826 788.950470077369 375.354746298695 425.435793468733  
516.992846073349 732.454837219705 377.847116683974 374.427492246826  
505.294880430281  
C6orf126 88.7928773498158 43.5873188565519 38.3166554965434  
42.4580504587581 48.9627346956003 40.650742261428 101.549779766678  
64.3284163241986 55.5086026637973 41.6373771565199 39.6403089864678  
42.1537476443423  
C6orf128 40.5235471987417 49.4067286971348 57.3697604614404  
55.9563971339766 46.2478069975709 43.5416683728269 41.8751578329365  
46.7980335276155 51.4111372893136 44.2580151149956 48.2573234404682  
51.8562635270111  
C6orf129 266.865951970965 178.323615832679 175.362103430164  
280.622184239624 234.477015135311 165.322633260592 408.865817081303  
149.899176549323 297.950627905767 109.525921548011 100.057155418659  
153.081027338185  
C6orf130 165.107387190373 124.002268940785 118.720812623965  
150.941470539313 98.5828998914961 188.386331007465 157.095926797414  
96.8240908274121 159.973746908596 185.395460281034 155.378768637562  
202.459251553516

C6orf134 53.7141746468176 48.1802212380953 51.0902940392974  
43.1447142498924 58.8281931439093 43.3234153488091 57.51482768194  
55.421880601441 49.2879849674517 51.631710130416 52.8337362018272  
47.2797818740024

C6orf136 152.66454549157 176.492987902471 208.097209050425  
96.3741876853801 212.187855950414 112.873697337138 200.002687565519  
99.3448096967314 193.569399061809 174.584330660466 172.676819138152  
165.311139930529

C6orf138 48.5835484742456 47.765848710116 51.6159542017038  
47.6687908290818 48.1473938886239 46.574682061365 50.3519150282938  
47.2009420656854 55.5751438859404 50.6486940895674 46.824299585607  
56.2804354745795

C6orf141 156.636360703756 68.1969125201241 49.2041300973417  
41.8778873678551 108.479856042609 61.6219790276408 67.3976855661302  
52.0503062610092 51.5229124652769 52.7972156492746 49.6706535876636  
50.5511827666954

C6orf142 40.6559419616644 37.6383530120621 39.4710743516517  
34.9221408381038 38.5512429290626 43.7630587657205 40.4359177791566  
39.9576138799997 42.2577689927563 38.4187686307607 40.9157352260901  
38.1421709520616

C6orf145 37.55264801907 36.9994058279362 44.4311655729487  
51.949834638817 38.0598374201407 55.401776072578 36.7356360093603  
45.7476095696859 50.4974478884077 49.8393069675192 42.8263096141654  
47.2131144508464

C6orf146 36.1232327599945 36.4002279956519 43.5710871617107  
41.7614975630362 40.8873907150245 40.9506062495231 39.4600924554505  
38.6454098044474 45.6582729799009 44.3648993568405 39.153226699662  
35.3525469364579

C6orf148 46.441301934328 44.6918600441328 43.7630587657205  
39.853175885492 47.9128504683618 46.3715909653832 40.4359177791566  
47.2864663693787 42.2577689927563 48.4890615340603 46.7386599624801  
45.8546719310325

C6orf15 38.5648843914189 41.159706131351 37.0642268327439  
37.5382094267692 32.2133093774284 40.4359177791566 43.3262148375525  
38.6454098044474 39.4762546236449 36.9102644736882 37.9946685306274  
35.8429598823818

C6orf150 47.7267190613906 70.0470864733496 46.2625470410195  
102.177189421378 48.2748123114598 48.9826868640753 119.277678423944  
44.6107027295193 56.7991853808475 42.4594149893798 41.8168470823451  
52.9609836781499

C6orf151 69.6449298794042 58.2571968311834 53.0104469636221  
38.6414316877471 80.9160262677505 62.5542376788358 60.7992483126292  
49.6203214143464 81.8983491901699 49.5265949137207 63.4323398447015  
74.6734358603424

C6orf153 442.380936516984 301.025314855652 419.563859911367  
341.397811775105 530.314249832491 294.372319595103 357.574415292533  
252.616382150668 374.601792595646 263.125290391542 242.932905246176  
235.148436322043

C6orf154 41.1523487516364 38.6414316877471 39.0775870687758  
40.4359177791566 36.8059561571675 36.4986986135769 41.9393838138203  
40.7311497914871 39.853866204927 40.3235655331796 36.0481934423077  
38.3291713594599

C6orf155 36.6480005877129 38.8336427948187 40.0998167098057  
37.8442841690502 37.1565984182084 38.9378717994178 37.3799542961839

43.7396619462033 40.137818555383 37.3179578037963 39.5399188536544  
40.4639532172338  
C6orf156 44.5282181324797 42.5269793679335 37.4642807402741  
36.6501141438378 42.269054475455 32.771863438151 43.5627649099623  
39.0620487644635 41.4636047919453 36.3612409063792 42.911855821602  
36.7762265039864  
C6orf159 39.0237504776589 41.7614975630362 44.5134109184888  
45.334106390212 45.8051846088552 49.1718303518849 49.3854238365325  
47.3791873993182 45.6080994842498 44.1861590259178 48.042366934301  
55.216338306812  
C6orf160 354.158105175308 304.977139992391 324.877187846959  
221.743315748689 99.3596089438084 779.333013700435 221.743315748689  
503.793770799548 174.985336606027 582.511224532378 1137.99307039386  
564.929183025034  
C6orf162 49.3463416794995 62.1642339365777 48.3458108324478  
50.5310598656998 47.0954207417646 77.4812665677338 60.1705241170421  
47.0940613507321 53.6446045619513 49.9493230064613 70.9638091288679  
61.4366256816323  
C6orf163 46.5549623118323 42.0709558258414 39.9101908547397  
39.3750969348308 41.1868052124344 45.4882438975269 45.7452456977857  
44.2159020605784 42.7150227340364 44.4652605017595 41.8168470823451  
43.9541718254769  
C6orf165 43.7783560914188 41.3351256327455 44.3662228328134  
42.7431359850339 41.6285300488826 41.0582900711341 41.4244721780607  
40.5585676679482 40.3704050658025 44.8522313252892 41.0441816173391  
42.7782216342806  
C6orf167 42.9104454767916 44.7829632472754 38.5045333213784  
37.651298468202 45.5809132232681 50.7516773099639 44.2166118829877  
52.1788489555942 44.2607789091176 43.401782064778 48.4717951775049  
43.5738557773903  
C6orf168 42.8036731479932 46.2286164776607 40.931294690669  
47.8164193292842 45.4751076037511 98.501431740607 44.0687697278114  
60.419911425109 43.1805016690297 70.4895190282848 70.2215218476683  
75.7140064167134  
C6orf170 113.351710503778 103.631449539809 107.637618676176  
115.913030448537 68.3419511055057 78.0586153423713 121.01013827107  
188.734299563005 73.2144205844199 151.266092912661 149.19643034862  
120.96329303892  
C6orf173 121.992700597635 128.885933852704 79.4998723172096  
84.2804410361247 73.1654226019863 67.8208976798364 176.839214683647  
131.67159377585 148.333778341005 65.813547096222 60.2165699959135  
57.2350830635912  
C6orf174 39.5676051939342 42.6939394537076 35.3649449469275  
43.3078542962968 47.6884372645373 44.1737502492846 42.629412460409  
44.0390019242862 45.0997987980157 41.9666541498638 41.7272875295469  
44.7401523707775  
C6orf182 39.4710743516517 40.0527893189096 43.9450023643394  
39.3750969348308 37.4470183315826 46.0364000143537 44.3440839686558  
52.1788489555942 41.4636047919453 48.4890615340603 45.390192977585  
43.6753843488695  
C6orf184 45.5758521267508 43.5182502375207 39.8299340037009  
43.0001432913058 40.148780650831 40.9967936671247 43.4933087941017  
54.9025626101017 40.1751033251565 42.4301183791899 41.9594153733826  
43.3234153488091

C6orf185 34.8099089553046 38.0226905622357 35.2101597814352  
35.7674462337723 38.5512429290626 35.8227939208521 32.9962272670005  
113.655306804539 40.4997186069494 37.1275334308172 37.7384958256497  
32.0636251428594

C6orf188 54.0990839134272 45.7317208802318 44.4311655729487  
48.1662933382789 42.0709558258414 54.4753345912615 50.3519150282938  
44.797320243931 43.4656637536244 39.0648733099061 52.6960621424156  
46.3411353377615

C6orf190 40.0557788909923 47.2770121962655 49.5424425850549  
49.9014504704021 40.2449343247539 43.3785777889265 41.4742337714895  
43.1567024035183 39.2809305246091 40.6022003765153 41.4508241771315  
47.5025821041537

C6orf191 38.5007204246293 38.8336427948187 41.785676764591  
41.0726336841311 36.9060997041453 40.1428591998404 38.2933870238743  
37.0390589468421 42.1594905198929 37.2089297656361 38.1835938174625  
39.4490233720848

C6orf192 136.155022329495 190.30941883755 181.738902391483  
179.07886477603 136.429803886927 119.866221751572 171.853856533964  
240.11295387591 115.052948380817 215.504612948048 189.267281390459  
180.63535336811

C6orf195 43.9309845324767 41.8848959280916 45.5883690965192  
42.0102671859606 45.9104478407175 40.5281496800812 42.7431359850339  
47.2864663693787 45.1899271235974 46.7646877499666 46.4205654140754  
42.9887069977696

C6orf199 41.2424637338424 49.5443425465542 45.7968648044613  
40.7481155008596 40.8873907150245 46.6872654833579 51.5967098638347  
99.2432911346944 37.10170285405 41.6373771565199 45.310660704531  
52.5752569429057

C6orf201 40.148780650831 42.6022652963326 43.0971787292711  
46.7577982595088 41.5668884168669 42.2577689927563 40.6750540874299  
42.2577689927563 46.581796165231 50.3388505346542 39.8184668132023  
42.1537476443423

C6orf203 51.8781065691038 43.5873188565519 38.0452862258803  
40.8681871019812 39.5595233162192 45.6129956328415 38.6243997507646  
88.9038123445083 42.5406888281114 43.2988017098387 47.8284278211109  
49.2064066614865

C6orf204 44.3355304829989 40.931294690669 37.7963032976457  
44.6905691366696 36.0439235933921 43.3785777889265 41.7614975630362  
40.4359177791566 41.9635525160083 40.6533975461148 45.447310733898  
43.7672102682067

C6orf205 45.5758521267508 39.8695929627783 39.991353369336  
38.3166554965434 43.9450023643394 53.2046867327331 42.9803717121865  
46.325232414659 40.6957787921451 44.4294261786154 46.29198852834  
44.293922970134

C6orf206 49.085741080241 40.148780650831 43.0971787292711  
45.334106390212 37.5556299264699 41.554942319225 43.1931731665131  
41.1575777497576 35.6139301508335 41.2276963324981 36.9060997041453  
39.0536056496869

C6orf208 47.4678477186801 43.5182502375207 38.5045333213784  
48.309866878365 40.4639532172338 38.9378717994178 46.7100796279384  
37.33030683349 40.2274522635576 46.5650556481721 42.8263096141654  
44.3521099857368

C6orf211 51.2851682978581 58.5406981871153 71.7336217321663  
59.198088069573 68.4961024593552 64.0354923953233 63.0842071602791

43.7731874801003 58.7382738968248 48.9826868640753 53.4088637045445  
62.3997407955361  
C6orf218 39.4710743516517 42.6939394537076 43.1931731665131  
44.0451487108213 40.8873907150245 41.3553369544097 43.1931731665131  
39.5466975353131 38.2215591930186 37.5343260962758 40.2649309204478  
36.1647506311964  
C6orf222 46.7293238583888 39.9697332660833 44.7829632472754  
44.550322123994 46.0977687311222 42.4580504587581 43.9450023643394  
42.6450179841129 48.0163377492228 41.9666541498638 38.8507804383261  
43.4709415392696  
C6orf224 44.5282181324797 42.6939394537076 38.1421709520616  
42.357910063876 37.4470183315826 40.4359177791566 42.7431359850339  
59.8760452220989 38.0213051227859 39.3698811593364 40.9157352260901  
39.4490233720848  
C6orf25 43.9309845324767 44.8024081259593 43.917817324545  
41.1886975241176 38.5512429290626 40.7158901597788 40.6085376283663  
41.7877325563821 42.5736687688554 40.1613888954735 39.0550139257658  
41.2836317141451  
C6orf26 55.3153799233744 50.6229884142872 55.7764940944098  
40.4359177791566 59.8102324370568 39.132725377815 58.2315917325629  
51.9447450229707 50.7619345314571 59.6863210839828 50.0808824383821  
50.0571060701893  
C6orf27 43.844855336215 39.5050383901884 43.6670755115848  
42.6913548400127 40.0599807618105 43.8582747295766 46.3057385979341  
45.2806199505029 46.581796165231 53.6429962450784 46.3370338074996  
44.7401523707775  
C6orf35 41.5421429082231 40.2093230376545 41.6977706798234  
45.9441733841041 41.6806984441849 40.1930209223556 46.4388841354122  
37.4484310268909 36.4816715148518 40.7063426028871 42.9634662926872  
41.2437378488025  
C6orf47 135.567012693522 97.0589984189239 92.3034609409756  
85.5959901987745 117.033529761587 96.5287245311078 107.466490458133  
88.5511408870489 110.699536638528 118.410983614453 127.49459343016  
110.947379383048  
C6orf48 451.711598030737 448.196293409768 527.686970237622  
368.660803187338 471.874412428677 1174.92419086759 345.294930735691  
287.423909789368 460.340300658834 604.951648398924 744.080606078086  
560.954913956997  
C6orf52 74.2151462073098 47.4740726032707 49.6347864008749  
60.620259884953 49.5666074434383 50.7516773099639 111.714563124738  
107.427186954956 91.5370872909881 60.6266092582071 53.0798381965427  
60.3816817102326  
C6orf54 45.4799270968969 43.3458769998118 37.1643693306382  
35.1451084093692 41.7929491793697 41.8613406887824 38.0598374201407  
44.7044140979108 39.4762546236449 43.6033221838149 40.3452320167286  
41.863927676552  
C6orf57 69.9431447778061 91.6978282652998 121.423421895502  
94.9785931907153 84.7782034884529 55.3202238943712 102.77259665192  
75.8976034525022 79.2129308982479 57.9713749600418 57.4622430729629  
105.828093778276  
C6orf58 39.4710743516517 41.2598458726002 38.1421709520616  
36.6501141438378 34.3633615460307 42.357910063876 39.5496902678788  
40.4359177791566 44.2607789091176 42.4594149893798 39.3667161654772  
35.3525469364579

C6orf59 41.9407041937973 38.1312950900467 44.1452943804044  
52.3004056941891 40.8873907150245 46.3715909653832 38.5066108855005  
45.7476095696859 39.0775870687758 60.6266092582071 49.7363778831003  
46.7182294568603

C6orf61 55.9249770393176 60.8608693323868 73.0128142320238  
61.7502624458447 51.4527545197672 41.6590564937735 46.8613212048981  
54.8412943008635 48.2123120250343 63.3006977162657 68.4659783447092  
76.2533853403813

C6orf62 262.153247969144 153.660685857642 159.727829541783  
172.540737848092 183.498228118271 135.323750661937 409.433491782481  
494.733185937057 169.168332370229 180.029671376384 171.058650956601  
153.864236983777

C6orf64 125.383837024985 66.8026147385682 82.2766822827861  
73.1447139654971 79.7808217577226 74.6375749739389 85.6236091398006  
72.3822545261582 86.4498396868205 102.771611905219 80.9024704745445  
89.4747568145717

C6orf65 94.1967497986791 45.4882438975269 40.7620472083159  
56.9299697426319 42.4864576619427 100.650129064849 48.4859552186772  
44.5029690493211 45.1899271235974 71.0619469948187 49.9338905397767  
54.6659845741133

C6orf66 58.691436315511 70.2288685232877 58.112348043634  
55.9563971339766 55.2214187655851 65.813547096222 58.7157078555305  
52.9813204449021 62.58750768974 45.3530683538086 47.3791873993182  
65.564930068976

C6orf68 39.266565827316 41.2598458726002 41.785676764591  
40.7481155008596 40.4639532172338 40.1428591998404 41.0381860307445  
41.2551966132486 44.3440839686558 43.401782064778 44.2142581488029  
39.3575468494941

C6orf70 121.104663867264 120.129857395808 154.309544187593  
136.541379502691 106.527144354592 126.753713093485 142.614006543733  
91.3607028449916 108.04376659067 134.601217321316 137.016387648703  
111.691813916343

C6orf72 54.3554233228353 57.2231446406982 70.7238101239421  
47.6687908290818 56.8307116636372 69.8832723783498 51.5967098638347  
42.5435283762933 52.5772854102326 51.3351387089044 48.1352470945488  
65.6876778328592

C6orf78 45.1912496459517 46.0713306971594 48.6037684272115  
47.2009420656854 48.8381507187986 49.8472708021525 48.3411413510851  
42.9301944191913 46.0106098064475 44.1379638573455 47.2134341420411  
41.2437378488025

C6orf79 40.7609952437622 36.7976562409506 40.0998167098057  
36.6501141438378 42.0709558258414 45.2852528185486 44.0687697278114  
39.0620487644635 44.619512785899 38.528621456378 39.0550139257658  
34.806104801006

C6orf81 47.5647821785529 48.9259041798949 52.0742951366864  
39.1706564265495 43.1252272136667 47.4699236780425 44.0687697278114  
41.2551966132486 47.6195009345747 42.2614524730856 44.553780984244  
42.7782216342806

C6orf85 167.760135663101 168.926743047741 262.153247969144  
98.2447263268855 137.132535402637 77.2834482217973 119.512426152446  
314.091389958069 338.530970447766 110.909109947659 140.976643799742  
99.7529382840954

C6orf89 99.1565755621214 77.8946473414547 95.1666040574435  
105.790224260281 85.7842344710572 101.909225305064 90.1500004950245



100.370937669662 94.7110944331075 86.2118355769367 79.8701900696361  
72.6182747525443  
C6orf91 41.9407041937973 45.8669209716694 47.0940613507321  
41.8778873678551 46.0043807840705 47.9503724044453 44.9863726205428  
43.4544762830742 52.9482338979681 46.1390887492649 47.8988096575648  
44.0451487108213  
C6orf94 37.3463875295726 35.9305494063137 34.1806289878747  
36.7892997857376 34.5301949364147 34.9849896310235 36.3194282084339  
32.8834169462007 33.2715481910159 37.4302011516587 37.3687900733549  
35.5523662009011  
C6orf97 46.6348258763289 46.5650556481721 43.1931731665131  
51.223859150798 48.6224651100733 55.8243694410835 49.8281348927244  
47.0940613507321 48.0163377492228 43.401782064778 44.3763859390287  
45.4799270968969  
C7 40.9558083259517 35.3307157989724 34.5718473203083 54.1240583139871  
34.2638875325204 312.245547906683 90.8691042645133 34.1806289878747  
31.5151915411476 64.9959712888709 115.88156897199 98.5339473137891  
C7orf10 102.513192587614 55.9269493191353 67.5417980425932  
78.7450149191851 66.0411740221276 78.1952428431942 51.7714254834195  
50.0526763693329 46.7760357462635 62.2025996860055 58.8188963227059  
138.070735985503  
C7orf11 109.192770642308 93.3216420803293 81.1249338842464  
84.1868287819063 168.798543634965 84.9099930524863 108.806649898122  
69.8099797531111 113.026772174726 58.2818491355907 67.6271456814495  
86.4195039096886  
C7orf13 52.310270746917 47.2055133646385 48.1331309338997  
66.4047895961325 67.8233625051884 47.2009420656854 59.1774824918359  
54.5125550937898 50.2223403889892 60.7495043977707 63.4323398447015  
48.9733758107788  
C7orf16 41.6354649482853 40.9731067463382 43.0971787292711  
44.1483976313959 42.6022652963326 44.3648993568405 42.8684958525042  
46.9986083378817 43.5669306063196 39.9948390976317 41.0808257270221  
45.6692241948108  
C7orf20 79.4916415027015 87.2351169088172 88.5458450926665  
66.4841955249254 139.566023291311 65.3096524773304 110.935994444429  
106.99628036922 94.1844708285913 61.9179665598635 66.4015820814547  
61.1630754250653  
C7orf23 146.658116519622 311.985010273921 361.158558609751  
360.668308246913 423.254211470935 259.332340491331 264.116434279258  
191.284436365696 372.982648892131 207.380865650247 225.120999402048  
299.094486437911  
C7orf25 99.5058761858884 91.7629175712824 99.7403508491191  
71.9062462001972 103.199200862158 100.802977734227 115.408418935236  
83.7019398654324 141.319488024794 77.4046818339539 87.3342335690393  
102.035798846699  
C7orf26 390.834121304799 289.410651581802 210.255784687052  
229.792906003602 356.079406408042 271.104193102849 246.313146942736  
293.755623192857 319.248898194029 308.728126648231 331.677243885539  
210.524799041662  
C7orf27 241.901039109114 201.941251308732 218.313812956524  
197.171449112363 419.182443507848 187.422036538629 164.580141651883  
152.456314990408 249.37112382902 264.263104842911 234.232348771362  
155.464685445566

C7orf28A 68.8195659637992 85.0946882743418 74.3902189072372  
62.1776700757427 101.699631771662 79.7564155881026 91.6526163804547  
70.4262478188233 107.70358681113 57.5245761633468 60.4991141099239  
71.6694991209816

C7orf28B 129.697400781396 196.096147690942 133.893108529325  
121.8863522969 174.252441615373 158.449570606242 172.869292380866  
124.605379715077 195.430996540859 74.0420372528779 72.2544131004774  
136.504157082236

C7orf29 86.6655289455628 51.7983110178095 48.9944486068347  
57.6511495792664 55.4919197421746 51.3886035574416 54.8074655158941  
47.5950227477807 56.432280646473 52.8928296360463 53.4088637045445  
46.3411353377615

C7orf30 726.42773300581 681.156163097495 781.223434214089  
482.238595345574 1305.35453202355 855.602941621804 822.822769402853  
535.585999498708 845.41973083225 331.591589534469 346.621778258188  
602.726022292973

C7orf31 38.6454098044474 44.0409178714232 44.5134109184888  
49.9014504704021 43.9450023643394 44.9896851005259 44.0687697278114  
41.8417024632349 43.6670755115848 44.2580151149956 40.0766543123257  
39.1553169409075

C7orf33 39.4710743516517 38.0226905622357 45.989212296035  
38.8495095797881 44.4489662507893 43.4681646416585 38.7337086062875  
41.3506832276112 38.9006788676407 38.0078357808393 45.1432412071268  
46.3411353377615

C7orf34 41.1523487516364 36.6968906669565 35.2838283525874  
38.3166554965434 39.4693871570028 36.3845892764084 40.3302268293707  
39.853866204927 36.0741672064298 45.7911932481722 33.8558232866797  
39.9519547348106

C7orf36 90.2721521466478 66.7256057011273 69.7855392178808  
55.6481366056639 125.891602778425 83.0554837248934 80.0733119200914  
82.6246523811721 108.937199348319 69.4131195465674 72.2544131004774  
76.6707262000712

C7orf41 80.7462144785541 105.446338599737 159.99819920335  
119.253559091088 185.667983376361 725.680256063016 116.311176407088  
145.791398829369 87.5074297754031 597.996273468244 545.827286197333  
583.237170605534

C7orf42 192.337581451878 219.134220280612 306.294404016622  
263.330471155421 270.89711217076 186.67069792963 163.809567262808  
313.46376203503 309.022069786139 133.192618821838 151.912182086236  
174.718984988254

C7orf43 103.356071080819 103.43536623122 112.865496075486  
97.6774247176874 89.8035133597498 66.1082848714279 77.5813459454823  
79.8264217848103 106.521012342668 84.6563174894574 100.159565926265  
72.7015808995427

C7orf44 365.860501246879 239.466489599238 304.258586051126  
241.222680673439 350.106705208362 228.08291792003 297.662970257144  
221.972553229362 357.762505796238 226.090904721424 255.598083334598  
364.337811621248

C7orf45 46.5549623118323 42.6022652963326 40.5734458834617  
46.3203995372658 35.9894133432376 42.9695585740813 38.7337086062875  
47.5950227477807 44.8003345643334 48.4890615340603 47.2134341420411  
48.3648494350286

C7orf46 51.1740855632044 51.0175677516029 47.646800205189  
44.550322123994 59.0965219753805 50.6360662655392 65.2361525412756

67.0904616289706 63.3694113050568 57.4665857273093 58.0800636554122  
61.0025829061063  
C7orf47 207.710354513208 343.262403838579 310.461601607662  
206.41879845205 273.349866592589 159.071016200059 256.766675299448  
238.819980744789 343.892794667047 240.476103976894 255.324974349269  
224.231862271463  
C7orf49 109.029196594263 121.613731804111 123.908152883436  
75.6103053700122 121.354667375673 82.4900927793125 112.113501370522  
65.1637149462661 144.500148287951 112.375316615894 102.559678338485  
91.40570426491  
C7orf50 636.367246129079 726.42773300581 517.664764759512  
530.710127703061 1039.58636143171 1032.44965920118 962.079396754147  
999.13039066242 1239.68399088145 922.047328788961 888.56944380788  
487.163435704392  
C7orf51 37.8386378737561 43.5182502375207 41.6977706798234  
40.1804147506786 38.745552403895 33.0463640202858 35.9058393060637  
40.4359177791566 39.1790517315259 36.0481934423077 36.8282383070068  
47.8931773060789  
C7orf52 41.2424637338424 43.2649781354792 40.8420925848403  
37.0732977341185 39.4693871570028 41.2567470068038 38.6243997507646  
40.4359177791566 45.5779686360641 43.2988017098387 39.8184668132023  
38.9496515344837  
C7orf53 55.2182004838121 47.4076235350059 40.7620472083159  
84.4422623834916 45.8051846088552 45.4882438975269 46.7100796279384  
51.4360013601805 42.9020321355927 56.4553747079294 46.8954576545929  
57.6860752168769  
C7orf54 155.564141715819 115.40235710164 107.971806573919  
235.544416908354 127.60426512782 127.265200736376 101.46584765758  
145.170590045628 106.10668428032 174.058845828966 141.261334415286  
138.070735985503  
C7orf55 120.426087248804 106.160416826673 90.8831233784641  
84.8948024208923 148.879760620316 150.009352890706 174.985336606027  
73.362936710475 95.5920087912438 138.027432399991 123.190887747662  
97.822911929574  
C7orf57 39.3709357615493 35.5310164682026 39.6451483836089  
39.066284740632 39.7568367479301 42.4580504587581 51.5967098638347  
37.5511560880902 43.6670755115848 38.528621456378 43.4709415392696  
42.8864415494484  
C7orf59 209.967057706137 113.102823481296 207.632489510045  
218.446312290024 200.986069552443 255.946758662074 287.883101814563  
240.11295387591 239.569514501529 299.094486437911 389.364650157102  
374.601792595646  
C7orf60 39.266565827316 41.0678614026819 45.4865173433646  
41.4273122914951 37.0526522140242 42.6575535390785 41.253645578517  
40.831207953647 40.0403898620771 41.7405682794166 40.9157352260901  
37.7526485343328  
C7orf63 83.5646728968172 63.3667304749164 69.9179689232341  
68.1992221684165 52.8190882379316 95.1468654370952 71.9474405671289  
163.38302606725 67.0290776715331 94.7110944331075 79.3191219048672  
94.7008981904016  
C8A 38.385865183581 44.5152708955623 44.1452943804044 41.0726336841311  
41.1868052124344 40.650742261428 40.9157352260901 40.4359177791566  
39.9444191873552 41.4397539024976 39.153226699662 36.6603338274678

C8B 36.7356360093603 44.6918600441328 40.4070046183108 39.3750969348308  
37.4470183315826 41.3553369544097 45.223075311113 38.956280281655  
40.4997186069494 42.3606390470387 44.0409178714232 36.9976231206067  
C8G 42.8036731479932 47.4076235350059 43.6670755115848 37.29566077996  
44.2607789091176 46.3715909653832 42.1607322031054 37.9837233601316  
43.5669306063196 41.1222709786153 43.0016969050339 40.4639532172338  
C8orf13 55.5276281380084 37.8217989841918 43.9450023643394  
65.7321440516177 49.7235523248653 41.2567470068038 43.9450023643394  
47.6952179922944 42.5406888281114 44.571915452417 39.4410515050885  
36.6603338274678  
C8orf15 45.7356815244513 42.8542642792862 44.0451487108213  
38.2041059863839 44.5668141895992 42.4580504587581 39.2533668167483  
42.8482181313226 42.9020321355927 39.0648733099061 39.8184668132023  
46.7182294568603  
C8orf16 45.5758521267508 51.2405397507224 61.9293105089291  
67.3439996689706 47.0954207417646 44.7804080899431 45.223075311113  
47.4740726032707 42.1594905198929 69.1623287497421 84.2960453806012  
89.3868257841517  
C8orf17 36.9060997041453 39.0102066700839 41.3366779545815  
48.665578118898 38.6454098044474 39.7394181011603 38.1793598983615  
40.931294690669 39.9444191873552 44.3648993568405 40.4504608195666  
38.745552403895  
C8orf22 36.0144420013819 44.4411734611229 43.1931731665131  
38.9534635879195 40.4639532172338 41.3553369544097 44.3440839686558  
37.6557714476853 41.1742244762318 42.2614524730856 40.3452320167286  
40.9683275553869  
C8orf30A 44.2350046179299 43.2028319630577 43.26160898693  
46.5331216396695 51.8636455065553 42.2189674040934 42.3360569471619  
39.5466975353131 43.2100129360085 41.0529409675663 43.8093452203209  
41.3844657483749  
C8orf31 47.5647821785529 45.0905928998779 42.640829914102  
42.2496337895968 60.8550020364269 45.0882356578404 41.706879587091  
50.628152951493 48.8842909466002 47.4767851750188 53.7475011049549  
47.5025821041537  
C8orf32 154.730266766226 175.099998331811 111.227016020927  
90.8188865732032 124.37984507038 130.02102880365 162.486448421519  
101.156215957297 142.066425511614 91.5417574979683 99.1952492360239  
141.888282820511  
C8orf33 238.510952165358 203.870471031175 170.287619901365  
121.851515410237 177.515053183327 192.398575159246 163.809567262808  
136.250317107253 270.756849919679 178.060342847557 170.780021121783  
149.173801572239  
C8orf34 54.4384603094793 56.3560498705517 63.1450855271137  
51.223859150798 49.5666074434383 81.8426140611297 62.0404348860702  
59.1107691694766 54.8946088631931 71.1607965028029 63.9029785089421  
60.8662233098324  
C8orf37 1345.37091574015 499.744856832174 704.601607617837  
782.639346040155 549.117045813593 440.728435508514 909.843512894628  
1762.93413846062 525.35784336478 1393.24135330226 1370.76188322111  
1020.75813028358  
C8orf38 130.058147569795 105.118498939628 68.8098607236981  
44.265834798964 178.44531401852 87.4239220649478 106.486195938039  
83.4679576894911 111.643323610073 51.3351387089044 60.394307846869  
69.8505620106065

C8orf4 234.615033303459 320.684862879691 484.567462838523  
203.759116151774 561.509463439533 932.849256536912 208.7739716139  
1269.36837611919 735.751447981069 126.764572234324 245.585026913915  
274.328990210853

C8orf40 306.115856873599 386.934057829091 315.799449362526  
386.98657211459 358.779372054826 378.964387825252 510.525676243746  
439.955651727755 271.138311888031 206.312848708143 250.210134743225  
370.917477324773

C8orf41 70.083473392272 59.3406363431414 62.8362064074814  
51.3851157261451 54.5683518971261 62.843734579668 54.1707158323527  
72.692416146584 74.0614295574729 58.6439719071099 81.8648220673828  
89.5687388187015

C8orf42 57.2960245538881 41.8848959280916 50.7502704822135  
44.7980740332174 58.037539503209 47.0940613507321 61.2183034191703  
54.3820590274321 44.2607789091176 56.1912096308988 62.6885730386156  
57.934622029119

C8orf44 52.2236479204029 65.3694267397114 59.4431489877328  
43.8002456102021 52.5645416722441 47.8636003588181 41.1507980856436  
40.047314525032 48.8842909466002 57.165971310746 59.5830868881343  
54.4992295592001

C8orf45 503.793770799548 328.962069934895 435.209988251425  
551.1195044975 271.070078611015 216.358862796367 399.80505620721  
786.57695312967 230.787791652978 749.206358448939 677.855726232203  
507.375704144286

C8orf46 39.3709357615493 43.5182502375207 40.7620472083159  
42.8235313007746 39.7568367479301 43.2805590023412 43.5627649099623  
40.2382908228517 43.0930293831497 42.8936990772838 44.9713479185144  
42.357910063876

C8orf47 42.7613994022988 51.1541843174981 42.9641759692926  
42.7489468897708 49.0145368354835 39.8785903668981 115.087963545095  
68.6704961638492 56.7991853808475 49.9493230064613 56.4567728276775  
63.2936377704897

C8orf48 48.6621527194963 43.7644428186265 47.2962360458401  
47.481302504066 45.9104478407175 43.6670755115848 42.7431359850339  
41.5464765641928 47.798305839406 51.0055825931636 52.7817052791259  
45.5800840647989

C8orf49 36.5393857306744 30.9403229851671 42.7303139017786  
40.0698728584484 38.1644569189523 42.157627240486 42.8684958525042  
42.2577689927563 39.9444191873552 39.6719190054379 36.8282383070068  
39.5418280570561

C8orf51 124.599352191013 53.9275079525238 48.3847843498476  
45.4634652319753 71.5345397102823 40.7616966228404 57.8870110456492  
67.2714646016644 62.4776210012906 47.1001757441025 51.1483696410762  
46.5650556481721

C8orf54 46.0023068797812 36.0366673493555 40.6737160001291  
42.4580504587581 30.7606118575469 33.4492509999281 37.830876898596  
36.7460922671619 39.2809305246091 41.1222709786153 41.2598458726002  
37.7526485343328

C8orf55 563.750309421406 1858.94179312821 924.316085565917  
118.762101740563 969.805093523651 175.876518898179 642.211963248041  
195.813431189188 1068.10627239579 693.727004855319 719.815240381415  
572.667024472672

C8orf58 87.5146535320072 52.3896785600751 57.50915811428  
54.2886483704949 42.9090346219023 44.9896851005259 46.5650556481721

45.1714698794331 46.4164127487052 61.8529316708431 57.4078217542368  
55.9555622193202  
C8orf59 377.76338037467 332.230531176052 274.809186311931  
266.717224821545 396.63268714181 263.67173636178 308.336693903042  
326.605198138576 347.829279462722 295.061449024268 239.590143292142  
418.927102569912  
C8orf71 38.8561375693335 43.1805016690297 44.8872784170036  
46.8954576545929 44.5668141895992 37.8102105794655 37.9430145836712  
41.4508241771315 43.5669306063196 36.3612409063792 43.0016969050339  
40.1700117452801  
C8orf74 40.9558083259517 41.159706131351 42.9104454767916  
41.0219290963778 42.2455707947223 41.3553369544097 43.9450023643394  
42.3887531663733 45.4799270968969 41.0057887014368 40.547835538778  
44.3521099857368  
C8orf76 611.538630852232 477.410937135204 274.962689159729  
317.004252313348 373.46798029115 180.065047496273 334.349204174886  
182.80711310964 338.164006403 290.81245174957 232.628747594691  
256.675896425075  
C8orf77 47.1962846565261 34.9262464079777 48.1331309338997  
57.0629653735694 44.4489662507893 40.5281496800812 50.2016912396771  
38.079222289614 51.6731332961917 40.5090849993014 42.7275315121163  
38.8495095797881  
C8orf78 39.266565827316 42.8542642792862 37.9482157381008  
45.0798408927912 37.0526522140242 38.8336427948187 42.629412460409  
36.0306975524309 37.7384958256497 39.6719190054379 42.8263096141654  
38.6454098044474  
C8orf79 43.7585538437696 40.2493681589104 37.8386378737561  
40.646702696033 39.6535880152834 40.9506062495231 40.4941260038116  
39.6995529770239 40.0403898620771 40.3235655331796 43.8002456102021  
40.9683275553869  
C8orf80 45.8108990837624 40.5400384479766 49.5424425850549  
40.1804147506786 44.5668141895992 44.7804080899431 43.5627649099623  
40.6171774724171 44.5303781239209 42.0621425894624 42.6366765186182  
44.0451487108213  
C8ORFK29 42.2455707947223 48.4980626712175 35.6139301508335  
39.5050383901884 46.6397391251762 41.8613406887824 41.0871827071116  
41.8417024632349 46.6944238390932 39.6719190054379 38.1253290586431  
40.5235471987417  
C8ORFK32 42.442231667357 39.0894172982439 38.7745734037492  
47.6687908290818 52.5645416722441 41.6590564937735 46.1634822993009  
42.6450179841129 42.1594905198929 39.6719190054379 45.4799270968969  
43.8575940017119  
C8ORFK36 38.1713217245067 41.159706131351 46.4569566520107  
39.9084621723809 41.3387790895716 42.0847226073592 34.3345418156105  
39.6474008369935 39.8873706855774 38.8173773425835 41.3945375181463  
43.4709415392696  
C9 38.5007204246293 40.148780650831 40.1985790927248 39.066284740632  
37.7576900881741 46.6872654833579 39.4600924554505 41.5464765641928  
39.0775870687758 36.3612409063792 37.7384958256497 35.8429598823818  
C9orf100 47.0940613507321 52.8388295105803 46.1907664490247  
39.8920832347262 51.2525124735102 45.0882356578404 60.162766751307  
50.628152951493 56.6848620589031 40.9506062495231 42.4238335236362  
39.2780515621926

C9orf102 82.6983700200815 73.6855877240541 62.5610562594275  
66.0397471691747 68.0414563597154 92.681224908389 83.6935756500468  
67.2714646016644 82.6157566292355 111.703187941409 115.496195377983  
92.1646038105091

C9orf103 96.8783070574131 108.019575675653 111.735319884512  
128.786137360755 82.1344514651393 204.251854342995 105.05842887748  
105.05842887748 68.8353800542132 122.702789229752 113.403020750953  
94.3953345963359

C9orf106 37.7384958256497 43.1805016690297 43.1931731665131  
49.1786207920603 41.9842695818285 42.9695585740813 48.0283573444179  
46.1673159982664 45.6582729799009 41.4397539024976 47.9942520395434  
39.9519547348106

C9orf109 55.4004611309636 46.1569135229922 42.9104454767916  
59.4674205670657 46.8674366115656 43.1826328292558 51.7714254834195  
49.3880946790306 50.9010149857308 43.401782064778 39.0550139257658  
41.0657892043496

C9orf100S 104.832753086298 94.9831937714438 86.2330249146534  
91.9185612536409 97.4137766910365 118.186590679218 93.2133061608764  
129.179537795204 100.591821617326 122.170704886985 122.469733727349  
119.512426152446

C9orf11 40.3478825593224 40.6380495994768 42.157627240486  
43.1847628331565 40.4639532172338 39.0266821712099 41.253645578517  
42.4580504587581 35.3227485563945 44.2580151149956 39.2542963855807  
40.2669497398702

C9orf110 36.2496364442264 39.3999056968598 38.7745734037492  
37.5382094267692 38.9496515344837 40.1428591998404 31.8431345631453  
40.5158867964016 40.0403898620771 40.3235655331796 43.0971787292711  
34.3409660445447

C9orf114 284.351747562807 327.238337722366 179.779145453083  
191.291480830946 384.992066112903 174.392758289374 431.353025968649  
166.734730009916 162.467159261789 312.469507672374 267.85990321012  
223.749512763927

C9orf116 106.620429405618 128.542999559673 65.6620676514157  
48.7646976789783 145.267770598988 55.6617952786921 239.610773859055  
95.7263252232278 123.768417863139 57.752606600685 60.0981687048269  
65.084620579901

C9orf117 44.2718517563299 39.3999056968598 42.5406888281114  
38.5252456306656 43.1847628331565 38.9661430990729 41.8751578329365  
43.0930293831497 41.9635525160083 43.0919221375514 37.7384958256497  
38.1421709520616

C9orf119 287.363928615517 176.624023915568 194.317275235015  
185.924923239764 242.83357283464 210.437554813031 488.277500837251  
385.827237353675 276.149150203786 295.5163490537 255.915599666591  
310.706520144173

C9orf122 37.0320432433314 35.8227939208521 43.401782064778  
33.8111782249716 35.1411239266238 32.6368705146258 39.7576136507593  
35.4526946152955 39.1790517315259 38.528621456378 42.170702295259  
40.4639532172338

C9orf123 77.6056319020116 93.6717518147993 66.0411740221276  
69.5544840164738 90.6661301391451 219.073357087203 77.0003455479124  
64.6316818494785 55.3122077514658 160.733526836282 144.771861156788  
109.090304050495

C9orf125 41.6354649482853 83.9760574088975 71.8706847571669  
41.3027031037343 51.4527545197672 50.7516773099639 56.0515443021293

40.6171774724171 69.0037087543684 106.049736669661 97.1271615802556  
111.691813916343  
C9orf126 48.3814421939888 48.275452803061 42.3536549114165  
47.3574589211166 41.8806343997257 37.3799542961839 47.7390230243778  
43.9366081640576 38.7298222155532 48.1392888470269 37.8372168909583  
43.6753843488695  
C9orf127 101.494432845825 64.0903425729408 84.2385359528743  
57.165971310746 78.1275793755619 95.4393274079354 68.5725871332774  
88.2568398791731 62.2097408040123 126.470889051684 113.539485042978  
103.104022477607  
C9orf128 43.0001432913058 36.4002279956519 42.4580504587581  
39.1706564265495 36.6354013629791 43.1826328292558 40.2154497375715  
52.6960621424156 38.3418933808844 42.8936990772838 42.6366765186182  
44.1452943804044  
C9orf130 123.868848519181 77.9992448636936 90.2638559113894  
151.225738885272 66.3075095149783 74.9006142438341 141.261334415286  
207.513604688444 82.8150137756969 184.484466722861 211.335020823243  
123.978615472736  
C9orf131 36.0144420013819 40.4359177791566 40.148780650831  
44.550322123994 40.9416717019827 39.7697110924474 37.1643693306382  
39.1128725343972 43.423558862426 45.9004543328976 39.7342718293432  
40.3691324547049  
C9orf135 43.6706764143908 44.4411734611229 36.178547300352  
42.357910063876 44.0451487108213 36.6271061451613 48.8319884367456  
46.5717043290731 39.4762546236449 43.4885245598939 38.6662194645633  
40.4639532172338  
C9orf139 41.1523487516364 35.5310164682026 40.1985790927248  
37.5382094267692 40.6723334103791 41.0582900711341 37.9430145836712  
38.956280281655 36.3649677956953 36.9102644736882 39.153226699662  
44.4475838947656  
C9orf14 43.4626049853157 40.4359177791566 37.5597671487621  
39.853175885492 43.3332476888305 42.8598805316863 37.7136011474903  
38.5457716679071 40.9901805728485 39.0648733099061 37.9946685306274  
39.3575468494941  
C9orf140 178.643141452509 474.729653426958 72.7987593815919  
64.898351831341 276.633536223159 51.8103411703261 228.907776306695  
145.791398829369 134.817234321847 41.9666541498638 39.7342718293432  
39.7411455670172  
C9orf142 853.464809072841 767.489657259345 437.148137705103  
378.358853591082 632.019639546131 363.002913525646 547.442608452594  
732.454837219705 580.444451816014 564.929183025034 740.994425128952  
402.886581458688  
C9orf144 42.1537476443423 39.2907645923217 44.0451487108213  
42.0102671859606 41.0885562160946 45.4882438975269 39.3585350448719  
40.4359177791566 38.9834959368496 37.2089297656361 48.6767028205398  
45.0985088502363  
C9orf150 68.7436392042714 53.7332797903102 59.1040441894478  
43.4410741327254 51.3511088648386 67.1067574196203 41.4742337714895  
35.2642250366721 58.0722340887264 52.4351670989268 46.972521499515  
52.4992300612807  
C9orf152 181.545493080363 129.190555260332 50.5089777244781  
55.6481366056639 48.7288537840562 45.1873487463472 53.3111230705754  
44.8997235283254 148.333778341005 65.0928075335306 110.214922820817  
82.9467575626263



C9orf153 39.266565827316 37.5469247328848 43.3085358214154  
41.6564075217517 36.4434672195785 42.5660695551615 39.2533668167483  
39.0620487644635 38.4344387289956 43.9450023643394 43.0016969050339  
39.3575468494941

C9orf156 103.458867136383 98.6825522152097 81.2136969156029  
168.926743047741 74.5758811681995 82.3364971911816 98.5663841503803  
85.0308877626746 86.6516906104905 118.115557136662 133.981674663494  
106.804269453898

C9orf16 100.057155418659 78.6705291023488 65.7670524353661  
49.5424425850549 73.1654226019863 85.2805684630976 137.081911344143  
99.9896394343368 106.317388820963 169.18132209076 151.758051124404  
169.554408876006

C9orf163 43.5710871617107 47.1332119496722 46.5650556481721  
38.0958223740111 47.3172462673426 45.9266745571724 41.8315602975157  
45.642304356051 48.5792058061372 43.9450023643394 39.2542963855807  
42.6758568421347

C9orf164 83.0534943004588 56.7826399116207 47.2962360458401  
79.7937658787441 41.6806984441849 38.7340969861754 45.3597029614942  
46.5717043290731 53.2046867327331 60.1466326805616 64.3824529624475  
48.27609330316

C9orf165 40.7609952437622 39.0102066700839 36.8730514568925  
34.7266486944713 44.6834648302383 41.6590564937735 36.197424053556  
50.3972033014227 33.5578650644246 33.8984830800739 37.3687900733549  
40.5703581862752

C9orf167 84.511841810844 110.214922820817 57.8111054584154  
95.5022104475922 101.383978726419 56.7429967489965 79.5707751325986  
52.9813204449021 46.4861258030402 67.0163226819964 54.2999306485758  
75.032753683526

C9orf169 107.034189847828 79.7691160370015 74.6901522573522  
45.5869891570251 54.0126916508417 37.7000400506818 61.2183034191703  
75.5830548489892 57.9713749600418 95.3300728806601 85.5175308034109  
67.1675878355908

C9orf21 70.2541961995753 50.4022543872993 49.3780606970538  
104.335120306753 48.9627346956003 99.0731740277519 46.4388841354122  
54.9919060580109 43.2761454096265 51.8412522234186 48.6767028205398  
58.5478485621444

C9orf23 105.027318695305 80.7894026811963 76.6571453659046  
77.1767494799711 118.288549974348 74.2690269784394 101.804757613639  
87.7295604723036 87.2282539094452 81.5678694264684 101.759714275976  
80.1665291227124

C9orf24 39.4196620674248 45.123403685928 45.1037002240382  
47.7462490950965 42.65897235979 62.0056315405014 44.2688720583707  
44.4031868028216 44.7058233759912 48.2596564318071 44.8872784170036  
45.7258895124195

C9orf25 70.2541961995753 54.113533179847 57.1226931773006  
60.620259884953 60.2886873195135 57.2767879969284 49.1067959632109  
69.845169494661 45.5779686360641 59.5785089386245 60.2165699959135  
51.0647893605839

C9orf27 32.5418171758086 38.4330755397458 33.4240466670776  
38.0958223740111 38.0598374201407 35.9305494063137 35.3362091871364  
32.6039814489621 35.7973685350741 38.745552403895 34.3633615460307  
35.4484652445078

C9orf29 40.6559419616644 37.8217989841918 35.6139301508335  
37.29566077996 39.9697332660833 34.2773859804062 39.5496902678788

40.6171774724171 44.8997235283254 38.745552403895 38.745552403895  
37.1747156131306  
C9orf3 78.5216977073842 90.4512650366645 47.9035532886869  
50.7046706880325 71.7263663921367 117.250114037308 46.8613212048981  
50.9933795450314 72.6675345946258 101.759714275976 65.088713927995  
99.3956523785983  
C9orf30 116.547937420457 83.014860007187 66.5285423077808  
119.39177524986 72.6675345946258 78.812106589086 111.367789538268  
90.2915974511786 74.7934385405346 57.7805922926828 62.9336909080086  
78.5108643908344  
C9orf31 45.3872406432794 41.9894412416874 36.3604951341921  
39.1706564265495 42.7982502551634 41.2567470068038 36.634024014558  
39.0620487644635 36.8127605061228 39.1621898366355 35.860430241131  
42.9887069977696  
C9orf36 41.1523487516364 39.1982470626863 42.7881985796277  
45.8844325913247 44.0977148249302 45.1411314881341 41.6466169548846  
41.1575777497576 40.9901805728485 42.7275315121163 38.4251036088595  
39.7844133452634  
C9orf37 51.2851682978581 34.2618170189676 45.310660704531  
45.8844325913247 52.0583273941813 45.4882438975269 49.540449125788  
43.3262148375525 45.0017158586743 67.3934788330567 71.9658486648999  
54.4992295592001  
C9orf38 42.442231667357 50.3586212130973 49.9256753636167  
47.3574589211166 42.0709558258414 45.3882138838137 40.2154497375715  
40.831207953647 43.2761454096265 41.2276963324981 41.0808257270221  
43.6753843488695  
C9orf4 36.3649677956953 38.1312950900467 43.8495248991589  
43.3078542962968 40.4639532172338 43.0860383229288 43.3262148375525  
42.6450179841129 37.5469247328848 42.5664883002833 44.2142581488029  
45.0985088502363  
C9orf40 61.356483470053 53.2046867327331 54.3554233228353  
54.1240583139871 85.1661952927159 84.3755392205436 73.6855877240541  
57.037639245179 107.538934056558 65.0928075335306 68.4659783447092  
69.4383198054368  
C9orf41 43.9309845324767 43.5182502375207 41.1367478979484  
45.5869891570251 45.1137938810047 39.7697110924474 43.4544762830742  
43.4544762830742 44.0519245668737 41.6724739851995 39.0550139257658  
43.4709415392696  
C9orf43 38.957687788868 38.3322849790657 39.7411455670172  
33.8111782249716 40.8873907150245 32.5219627196161 35.1307934330047  
37.5511560880902 36.197424053556 35.93950183586 37.6484782516569  
33.3192849177028  
C9orf45 68.2614370871382 72.3297091475814 61.0370242377391  
77.2218991550552 57.2960245538881 60.7488007939604 93.0538726751588  
78.6911549149983 58.7382738968248 119.979854891563 92.1646038105091  
83.2925226467532  
C9orf46 255.559793355361 337.948887427898 188.513581321162  
455.223217772744 177.912351477808 320.086549121732 255.762638489554  
559.559234461244 187.147252401703 145.936763882526 169.061093538895  
295.473526251997  
C9orf47 37.55264801907 36.5219488315447 39.8299340037009  
37.0732977341185 37.3508690072156 44.0804700754786 36.8369172900902  
39.7509165247419 44.619512785899 37.6383530120621 42.6366765186182  
41.1554481567603

C9orf5 126.404988409795 224.945809325258 131.413578749264  
120.284321694275 158.918242816842 236.178265404264 165.606015336587  
110.869341159607 119.253559091088 324.320137371059 340.311633794489  
416.149496747947  
C9orf50 38.385865183581 43.7644428186265 41.2365089689635  
41.0726336841311 39.9697332660833 42.9695585740813 40.7910160811527  
38.956280281655 48.5792058061372 36.5806287103157 39.3667161654772  
43.4709415392696  
C9orf53 43.3638918705225 40.716553247236 45.3974838013476  
37.4223289687135 40.2449343247539 41.8613406887824 38.8417151851134  
35.1738399826814 35.1155486926999 37.1275334308172 38.8507804383261  
40.5703581862752  
C9orf57 40.8681871019812 41.8848959280916 37.8386378737561  
39.066284740632 38.6454098044474 39.9397419279057 41.0381860307445  
40.4359177791566 41.9635525160083 40.5090849993014 47.3791873993182  
40.8681871019812  
C9orf58 84.3850767822327 43.7410507935043 43.0602678767669  
40.1804147506786 53.1100587888055 88.077258947198 55.8510296341925  
66.8364940429355 46.824299585607 52.8496345990125 51.8812208789107  
49.434568584642  
C9orf6 105.371285021629 153.364107550338 97.3756238014731  
123.022511916727 135.829530518199 113.46454061183 125.835967514239  
104.480361196422 147.165235402905 85.3431175579775 96.593956699892  
147.300356318739  
C9orf61 60.0793579902362 51.1740855632044 56.1434024065079  
53.0284011078097 43.9450023643394 147.782301091454 44.3440839686558  
52.3068458655445 57.0301170427216 186.64040927334 183.690616959682  
94.4769283676944  
C9orf62 54.6235981131919 42.9358255168086 48.6037684272115  
56.4578213622965 55.3100442506299 46.6872654833579 46.9929836306816  
51.6660481331154 46.8873421271259 49.1928206164702 43.7585538437696  
46.6397391251762  
C9orf64 59.9232969481163 69.1414574152997 58.9135553403521  
86.7823828209946 65.9413235523618 67.6817814091697 60.2399886747451  
48.7814131120945 55.7522234735038 56.1912096308988 72.768998788927  
67.9850517608624  
C9orf66 63.2753814090696 82.6602736441839 64.8254097948745  
97.4967204298499 55.6991707857987 60.7488007939604 89.7242042805798  
71.8314470868658 67.0290776715331 65.5349012839562 63.5195937348531  
63.1443731864055  
C9orf68 41.3785995857154 42.0500582486532 46.8267540220952  
41.1886975241176 40.831207953647 39.4512099697623 39.8695929627783  
36.5933320803035 38.7298222155532 49.7259371799014 43.6919270353542  
48.3648494350286  
C9orf7 217.575115287224 132.400225103653 98.1433318215702  
78.3509756704423 83.6438735616921 60.9822577063534 198.729330487352  
228.660261263355 151.344720108793 142.095236399173 152.200107222761  
109.017269529278  
C9orf71 40.7609952437622 36.1232327599945 37.9482157381008  
46.614092935749 38.9496515344837 36.0306975524309 36.08956004634  
40.1474543172332 39.2809305246091 35.3849221682845 40.723990462047  
41.6550823405646  
C9orf72 47.9707112435212 50.7487159427973 43.4456430103334  
100.413031488199 44.5134109184888 53.3185097662527 49.6872467499977

49.8638539895028 43.8017789369861 51.0459299480813 51.9490810272761  
49.8253396161069  
C9orf75 76.309158701514 72.6162848018047 41.6079958749402  
40.0698728584484 61.6452971581503 52.8421046802739 56.0515443021293  
49.9332280449549 51.3511088648386 78.7543199947688 60.0765286625112  
61.0025829061063  
C9orf78 612.441960343995 717.997180920384 394.990145259101  
428.411504354946 592.989860385203 830.295872113419 738.059797123491  
398.641868389511 393.944898808828 500.794458547464 594.184150517102  
572.19538884395  
C9orf79 44.2350046179299 46.6314009405034 47.0055981216687  
46.1673159982664 44.6834648302383 43.4681646416585 46.7100796279384  
48.272324215504 44.8997235283254 44.7958122466628 43.4709415392696  
41.0657892043496  
C9orf80 1756.86714809925 1075.04105984319 1159.77262479002  
1453.77801653969 822.372309550325 682.479411898549 1411.12613289991  
2365.73772015255 797.019657306322 2054.64068255575 2032.18819581205  
1575.71609894038  
C9orf82 62.0553450433433 60.3928833351886 53.0630927250439  
62.6048727240291 60.5290966885203 59.2643906275025 66.0350709576651  
51.0724630072723 66.0350709576651 78.0658258913875 74.9006142438341  
77.0262811825953  
C9orf84 42.4757115539502 42.3138951003676 38.7429005059745  
42.9358255168086 43.2988017098387 40.8956286697415 42.3360569471619  
43.0895173605825 40.8351751854504 40.4136535208406 39.9070785037411  
43.423558862426  
C9orf85 40.8681871019812 53.9634127270611 41.0718387273629  
41.7614975630362 45.7407938943718 42.0574848021044 40.1613888954735  
45.3872406432794 51.2776048338 39.5637454855233 44.553780984244  
54.4644832805303  
C9orf86 260.766438659762 264.495576211074 107.034189847828  
107.799236230743 149.551650453179 153.992331037033 276.633536223159  
157.281394920992 160.425627898607 126.897002134472 119.277678423944  
96.8555197062122  
C9orf89 148.477784236365 148.781721594419 119.243515595981  
274.02972772427 109.758297200083 199.660904693786 202.01900875263  
122.877322487518 174.350348527098 130.15891745292 127.596368103014  
139.062073456923  
C9orf9 55.6268253440479 50.1027491117756 46.1653991089885  
46.0228732507872 55.4919197421746 81.6949047529395 84.260633540656  
64.3284163241986 49.1940901905636 70.4895190282848 65.5386366902998  
58.112348043634  
C9orf90 105.308648028552 137.424708183613 112.159199477006  
106.582060920252 98.93324263369 95.6783002876222 129.810477623628  
111.492046718579 153.812414753676 116.441764463618 103.63788330957  
92.8006484232438  
C9orf91 99.6265783263109 85.5135159896819 66.8632294055679  
118.49449420132 68.1674425673171 64.7905331739366 96.0539709962851  
76.3509533017572 98.5609311953771 100.271925566074 95.92436282414  
92.3388129097482  
C9orf93 47.3791873993182 43.2109153553335 42.5864346233886  
49.260242314197 43.1847628331565 46.1974343793412 40.7910160811527  
51.555506218204 44.0256815382334 55.073022935193 45.9725715538987  
46.7182294568603

C9orf95 63.2753814090696 115.735359157053 112.727277807495  
135.323750661937 66.3075095149783 76.0240426902567 56.2181240696479  
47.5950227477807 76.2591822114739 173.891042920642 91.5541137821803  
206.857208722995  
C9orf96 44.2350046179299 38.7344853699576 43.4709415392696  
47.9915414951747 42.7982502551634 41.7627910693483 38.8417151851134  
41.7419877611072 34.226171989766 45.0155543555707 44.8872784170036  
32.4951076826876  
C9orf97 66.9417866448504 69.1414574152997 63.6334154351075  
66.224559122062 61.7566103867825 75.7502062965698 68.673864919178  
51.9447450229707 67.9176876913772 54.7827221235949 60.6505672212119  
78.3467096982408  
C9orf98 45.2875173643252 38.3322849790657 40.301483914446  
43.8002456102021 44.9936360641969 47.4699236780425 43.4544762830742  
41.7419877611072 38.9006788676407 36.6893251782922 43.5710871617107  
42.9887069977696  
CA1 43.3638918705225 38.3322849790657 37.2838080935695 46.3203995372658  
42.3685136297603 41.6590564937735 122.118080859526 39.4710743516517  
37.6383530120621 45.0155543555707 40.9157352260901 41.1554481567603  
CA10 40.9558083259517 42.5269793679335 43.401782064778 41.4273122914951  
35.9894133432376 41.7627910693483 46.1634822993009 43.6434576713809  
36.6312676076142 40.8049408996274 44.9713479185144 48.6795178347248  
CA11 60.7371790125714 45.7979032939211 49.7350276169552 80.4007868743886  
64.4999048115671 91.2681347227088 49.3854238365325 61.130286531713  
58.9870089759222 75.5171857162768 87.6689055777294 60.7495043977707  
CA12 228.809697062726 119.311590524726 534.881442644054 428.105433953405  
336.490083577377 241.31366702947 139.08163074096 176.816741656659  
851.108027634251 676.672146226382 596.384327208699 662.041552795049  
CA13 39.3709357615493 47.1332119496722 47.3861758958576 48.856176220627  
41.9842695818285 37.1317006162938 40.7910160811527 43.2551508830106  
48.1174861108648 46.8954576545929 45.310660704531 42.57175366709  
CA14 38.957687788868 38.8336427948187 43.401782064778 36.3604951341921  
39.5595233162192 39.2985791324641 38.0598374201407 38.079222289614  
37.1820543575123 38.745552403895 38.1835938174625 37.7526485343328  
CA2 235.018922676506 389.364650157102 273.849703944739 424.085665569421  
158.464244518317 71.5249259772583 405.148979342648 97.398745552008  
85.9970657980042 65.813547096222 71.0369238830779 112.021971795593  
CA3 38.8406533304174 42.9358255168086 39.9101908547397 41.8291484190524  
36.489383074099 46.9515828775339 42.6913548400127 44.1642484298135  
42.8036731479932 44.2580151149956 43.6629145624937 40.5703581862752  
CA4 330.892010103508 83.4951332849212 50.8303921211581 82.2766822827861  
97.2316181542823 79.4053001255904 274.081959734368 341.535750991033  
59.5093038629766 63.197604174872 124.041740442038 52.4992300612807  
CA5A 37.0320432433314 37.920964499903 36.178547300352 39.853175885492  
38.6454098044474 34.0045980663271 38.8417151851134 36.6452480995946  
35.6970528713709 38.6454098044474 38.6662194645633 35.6427313468066  
CA5B 71.9062462001972 54.2924642952939 67.6373573669424 64.898351831341  
44.4489662507893 69.9819944829311 81.7434024567356 69.7729022157455  
52.2631308081333 102.044838876428 81.0562186907518 61.356483470053  
CA6 45.1912496459517 44.7829632472754 42.3536549114165 45.1944222548351  
41.9842695818285 42.4580504587581 41.1507980856436 42.7431359850339  
50.6750785584772 45.1569741609597 48.8088340735921 49.3984571719129

|         |                  |                  |                  |                  |
|---------|------------------|------------------|------------------|------------------|
| CA7     | 39.3100256336821 | 38.6704566269103 | 37.3687900733549 | 40.1804147506786 |
|         | 38.6454098044474 | 35.9851865044027 | 37.7136011474903 | 40.0965255448873 |
|         | 38.0213051227859 | 39.3698811593364 | 39.6403089864678 | 35.5137794453559 |
| CA8     | 40.7609952437622 | 45.2556760873335 | 43.4709415392696 | 35.8472302065546 |
|         | 42.6022652963326 | 49.641159251878  | 42.357910063876  | 43.4544762830742 |
|         | 42.1594905198929 | 46.441301934328  | 43.3085358214154 | 40.8681871019812 |
| CA9     | 116.253417059012 | 140.369714831352 | 129.179537795204 | 40.7481155008596 |
|         | 132.946528291039 | 49.3172204533818 | 202.983984966874 | 43.1567024035183 |
|         | 1545.76489731307 | 49.5265949137207 | 51.838002904753  | 37.9607839934735 |
| CAB39   | 589.395944599882 | 563.573152902421 | 449.059703234741 | 725.680256063016 |
|         | 490.301992866742 | 747.577738135496 | 432.001201940414 | 623.574706535278 |
|         | 478.799250340246 | 540.721068846198 | 679.309039810384 | 817.631505579476 |
| CAB39L  | 91.8414653633828 | 155.730834354163 | 128.860357469791 |                  |
|         | 61.6702707724448 | 115.676508349703 | 101.577767481269 | 177.779514321673 |
|         | 165.974848305379 | 96.4740168904128 | 87.2532250821857 | 85.551605908163  |
|         | 92.9043863423147 |                  |                  |                  |
| CABC1   | 168.036319777283 | 334.726233105118 | 335.655540947167 | 189.984886903595 |
|         | 308.728126648231 | 616.265771322835 | 400.973553604192 | 389.422882761332 |
|         | 176.02137177982  | 527.686970237622 | 550.371519625344 | 225.875798191473 |
| CABIN1  | 158.042994416158 | 163.718576695806 | 173.08677862231  |                  |
|         | 182.219366179899 | 106.871269007146 | 165.662539866309 | 247.700075839517 |
|         | 134.664025291418 | 138.036631806718 | 182.079641528208 | 215.609821689043 |
|         | 131.330480963914 |                  |                  |                  |
| CABLES1 | 74.2151462073098 | 182.80711310964  | 84.1401040507557 |                  |
|         | 68.8167148906225 | 70.0133734659853 | 86.6246917308185 | 55.5578334877425 |
|         | 72.5835488194631 | 75.3761360028971 | 107.987729161223 | 84.607833108004  |
|         | 83.5069968129733 |                  |                  |                  |
| CABLES2 | 74.4565795414712 | 62.9904770954043 | 62.1893884200745 |                  |
|         | 49.3654837541353 | 60.0736861987141 | 60.4065050472082 | 79.7564155881026 |
|         | 74.6572522248684 | 60.164635768614  | 69.4131195465674 | 50.0808824383821 |
|         | 44.1452943804044 |                  |                  |                  |
| CABP1   | 44.0328992213727 | 43.8336862998829 | 42.1860813954352 | 41.0273093212371 |
|         | 39.3100256336821 | 43.5474493120701 | 40.7910160811527 | 42.4580504587581 |
|         | 37.3600014814388 | 46.325232414659  | 44.0484280023299 | 41.6550823405646 |
| CABP2   | 41.7780833969533 | 41.6757511223421 | 38.7429005059745 | 42.629412460409  |
|         | 40.4098450813524 | 45.764546125016  | 43.1696495767273 | 42.5435283762933 |
|         | 41.7269688948274 | 43.0290260867894 | 40.8225507267584 | 40.9243125941198 |
| CABP4   | 49.7188990489616 | 49.9085372049438 | 59.9690744676539 | 35.3829784221072 |
|         | 45.8051846088552 | 44.8872784170036 | 49.6872467499977 | 50.628152951493  |
|         | 44.5303781239209 | 40.4136535208406 | 42.357910063876  | 43.9541718254769 |
| CABP5   | 43.3638918705225 | 41.7337506166619 | 41.2365089689635 | 37.4223289687135 |
|         | 34.6227169056411 | 38.8336427948187 | 35.9894133432376 | 41.8417024632349 |
|         | 36.3649677956953 | 39.0648733099061 | 38.079222289614  | 43.2776458914333 |
| CABP7   | 47.7267190613906 | 50.9643363406241 | 55.4502804236424 | 39.1706564265495 |
|         | 40.0599807618105 | 38.7340969861754 | 88.8039637390786 | 55.421880601441  |
|         | 57.1863195337055 | 46.2286164776607 | 47.8284278211109 | 48.3648494350286 |
| CABYR   | 40.148780650831  | 41.1212129940704 | 49.7350276169552 | 38.1421709520616 |
|         | 45.310660704531  | 42.357910063876  | 44.7958122466628 | 66.3558126170575 |
|         | 88.3335649692467 | 52.7972156492746 | 47.0110068985119 | 50.5165823866945 |
| CACHD1  | 46.5759625882541 | 42.2577689927563 | 49.3780606970538 |                  |
|         | 42.2496337895968 | 38.5512429290626 | 52.6747142992864 | 40.5585676679482 |
|         | 50.857522488428  | 47.3158504988956 | 64.1724883992867 | 64.898351831341  |
|         | 60.3816817102326 |                  |                  |                  |

CACNA1A 43.4626049853157 40.6723334103791 40.301483914446  
39.0156305603334 39.4693871570028 37.0180934800573 45.4164642922183  
39.9576138799997 39.6413313949444 39.3999056968598 40.7725311293918  
39.2469742642337

CACNA1B 63.8626921347231 54.3554233228353 61.841867306916  
87.114638423256 62.3233491851723 52.0299937917925 62.3556396662215  
61.016921238986 59.8158518516035 48.6124127998952 57.0154839296649  
64.650642183463

CACNA1C 44.7044140979108 41.7575097298927 43.5448014872301  
40.4359177791566 39.8238654968211 67.4846787600629 38.2197745884174  
40.0873854338318 40.2752425854368 47.2299678280724 49.8678783525263  
52.8796369426118

CACNA1D 51.413025495745 45.4143854024453 52.9111155236961  
42.8235313007746 46.6397391251762 47.6803619768589 51.4349390827895  
45.642304356051 49.1940901905636 39.6719190054379 51.0492389286271  
46.5650556481721

CACNA1E 42.0532901689036 44.8529259387308 38.1421709520616  
55.8709511400674 45.6895223823001 37.0180934800573 43.5627649099623  
41.2551966132486 40.4220196471124 43.6033221838149 43.7585538437696  
39.3575468494941

CACNA1F 35.1307934330047 41.3610369241157 37.9482157381008  
41.0726336841311 39.5595233162192 38.3418933808844 43.1931731665131  
39.853866204927 38.9006788676407 43.9450023643394 41.6336636285875  
40.2669497398702

CACNA1G 38.0709016691086 40.9291911731327 38.2502942836481  
42.4580504587581 42.8596678196469 37.74484750596 41.7469782431906  
40.0842340147135 40.8331190350174 38.745552403895 38.5668610487033  
38.989836064185

CACNA1H 86.5564881117807 382.538365722661 341.206585871289  
58.0218262176065 78.812106589086 561.855286945959 51.0724630072723  
65.5820437889838 51.6258604434499 263.765914589758 280.820745089796  
197.540681021755

CACNA1I 78.6344248102932 98.8478655411492 105.814959179397  
41.6564075217517 54.9249759425252 39.7697110924474 42.3194600586894  
63.2125855149045 65.326134385614 42.8414096678708 36.7283081422707  
39.9941474864076

CACNA1S 38.304249186058 41.9894412416874 41.0356368374708  
38.5252456306656 39.4693871570028 38.1169703906207 36.9355798143571  
32.7676164492555 44.8997235283254 35.195364621675 41.0808257270221  
40.3691324547049

CACNA2D1 40.3478825593224 38.3322849790657 34.9849896310235  
37.4223289687135 40.6723334103791 42.750861693377 35.1307934330047  
38.6454098044474 34.5633623842083 41.1222709786153 42.4580504587581  
37.6557714476853

CACNA2D2 44.5282181324797 45.9732108120834 42.1901757067073  
46.1673159982664 54.7488960681248 50.6915708372926 44.1407835440612  
47.5950227477807 42.1089765085639 51.173096357454 47.8988096575648  
45.6692241948108

CACNA2D3 51.2851682978581 54.2924642952939 47.7737810047679  
58.9168466928565 40.8873907150245 46.8954576545929 41.4742337714895  
40.831207953647 46.1101825640108 48.9826868640753 42.8263096141654  
50.0571060701893

CACNA2D4 43.7920955808549 43.2649781354792 43.5710871617107  
57.8277957325085 44.0977148249302 43.9366081640576 46.3611042575528

41.4061152929154 43.3262148375525 45.0155543555707 42.911855821602  
46.3411353377615  
CACNB1 44.2807847072108 40.6663433492192 40.7977328778231  
43.3772464014781 44.8351976221735 40.6959906307191 43.3925093042325  
41.5783566611007 43.9204029310411 42.785429206422 42.2618615571566  
43.2102212096561  
CACNB2 36.3649677956953 38.0226905622357 40.7237253120485  
39.8965727231863 41.3351256327455 70.7702047405718 38.6510172759977  
38.5457716679071 37.854877390128 47.965492554043 47.3791873993182  
52.3242437351389  
CACNB3 420.401914084346 526.146757036152 360.523229691604  
100.483113678344 371.709014310561 125.364451149941 531.36214636517  
839.850453078119 496.163796158189 213.768352764473 222.05036990665  
168.869258524932  
CACNB4 40.0557788909923 38.0226905622357 39.3260254992968  
37.5680550468481 39.3100256336821 40.713858228386 41.2884376047238  
38.5143356726527 37.6383530120621 37.267270263961 38.2350720635382  
37.6276092293112  
CACNG1 32.2133093774284 36.89524015739 47.646800205189  
35.1451084093692 36.3390947880186 36.0306975524309 37.2892641289258  
41.3506832276112 36.5393857306744 42.2614524730856 39.0550139257658  
35.3525469364579  
CACNG2 30.6242215267208 40.7952353240579 40.931294690669  
42.0102671859606 49.5666074434383 37.2686490268265 40.7910160811527  
39.3709357615493 41.074824727477 38.8507804383261 41.5421429082231  
39.2469742642337  
CACNG3 51.413025495745 42.0709558258414 37.3687900733549  
42.0102671859606 41.1868052124344 43.6670755115848 41.5817737564592  
43.9366081640576 45.1899271235974 41.8613406887824 42.357910063876  
40.9683275553869  
CACNG4 39.8662795144616 43.683792219729 48.0191002461099  
37.9875302985336 45.1137938810047 46.574682061365 39.0458123429605  
40.3357777530419 40.6957787921451 42.3606390470387 41.4508241771315  
36.064718696392  
CACNG5 39.0950295411867 42.558457786077 40.8833572570383  
40.3850714987723 39.7568367479301 38.2293008890613 43.8973899364093  
42.6975474602554 39.7537274655115 38.6933639353772 40.4166536885831  
40.4639532172338  
CACNG6 43.3138142470517 45.7589758958741 43.9450023643394  
44.9936360641969 39.2608760193011 41.2567470068038 43.8664428040913  
43.3729486804084 45.8325181856483 42.8304701368556 40.5865217310152  
39.7411455670172  
CACNG7 45.5758521267508 39.3999056968598 39.2707964550441  
44.4367387274922 34.806104801006 38.1169703906207 46.9929836306816  
36.8400213077707 37.7384958256497 43.0919221375514 40.1742127891824  
39.4490233720848  
CACNG8 45.9426591985894 42.6022652963326 45.9227107476843  
43.7410507935043 44.6202070855297 42.9104454767916 45.6706505553383  
47.0362584198466 46.0106098064475 44.5303781239209 45.0017158586743  
40.8098117292322  
CACYBP 90.9521112485099 97.1271615802556 127.034476771265  
91.8295472317386 105.783933158577 106.8866235778 111.845105854608  
70.3935694362568 110.540953771795 60.7985356140269 69.8505620106065  
96.221685383385



|          |                  |                  |                  |                  |
|----------|------------------|------------------|------------------|------------------|
| CAD      | 112.924613715969 | 91.3941563889513 | 104.832753086298 | 94.3229189690855 |
|          | 160.566474370004 | 85.8059456975413 | 124.965915196815 | 156.220155161711 |
|          | 85.9850306181736 | 76.011923854897  | 71.751972433516  | 72.3297091475814 |
| CADM1    | 101.58345410371  | 177.602690452814 | 113.6408244935   | 103.961956810572 |
|          | 80.3500323413132 | 93.2226507128199 | 75.4053820110486 | 114.959624673123 |
|          | 43.0930293831497 | 158.478919789334 | 102.77259665192  | 290.174315362911 |
| CADM2    | 33.4902421268456 | 33.0553208959996 | 37.3687900733549 | 36.6501141438378 |
|          | 38.6454098044474 | 40.7616966228404 | 33.9750800030909 | 39.7509165247419 |
|          | 40.0403898620771 | 42.0621425894624 | 39.2542963855807 | 38.8495095797881 |
| CADM3    | 41.0608773166058 | 40.5400384479766 | 39.4710743516517 | 51.7739270955254 |
|          | 42.6022652963326 | 114.526825145076 | 41.8315602975157 | 42.4580504587581 |
|          | 37.7384958256497 | 105.828093778276 | 92.2772139468085 | 63.2699016184868 |
| CADM4    | 67.6767845246581 | 48.2220547806679 | 54.6051538001037 | 39.9697332660833 |
|          | 87.2282539094452 | 50.5148383400703 | 66.0350709576651 | 145.050655626219 |
|          | 78.9521593412581 | 50.6486940895674 | 61.940656536312  | 56.5225014032155 |
| CADPS    | 36.0674080694129 | 38.956280281655  | 38.4428081526233 | 37.9315270017242 |
|          | 41.7503755215516 | 40.0746066749942 | 40.3850714987723 | 42.6008809597607 |
|          | 40.8503192605024 | 41.800198520267  | 40.2649309204478 | 40.9243125941198 |
| CADPS2   | 75.1701698483856 | 57.5941849631773 | 63.0670482657086 |                  |
|          | 62.7108230507424 | 52.2089306840125 | 69.8832723783498 | 59.7444979429174 |
|          | 67.6767845246581 | 96.2385885003071 | 80.9024704745445 | 72.4325984501758 |
|          | 65.6213260281822 |                  |                  |                  |
| CAGE1    | 41.3785995857154 | 42.1372626664516 | 39.4710743516517 | 51.4802440299586 |
|          | 43.004943518025  | 39.266565827316  | 44.5390641547628 | 45.9604707098953 |
|          | 45.8325181856483 | 38.4829727716328 | 44.6834648302383 | 45.1735152121056 |
| CALB1    | 42.0532901689036 | 43.5182502375207 | 35.2838283525874 | 43.4410741327254 |
|          | 37.4470183315826 | 37.2686490268265 | 62.801431502597  | 44.0390019242862 |
|          | 38.1169703906207 | 39.3698811593364 | 38.745552403895  | 39.0536056496869 |
| CALB2    | 187.16833117416  | 43.0227387991135 | 43.917817324545  | 53.4785152499923 |
|          | 43.1847628331565 | 105.111902911639 | 42.22763273471   | 58.676230030835  |
|          | 49.2248095024373 | 59.2628513357357 | 56.3884556031093 | 48.1125722136997 |
| CALCA    | 43.0930293831497 | 41.3610369241157 | 38.6005272730664 | 39.7742005651286 |
|          | 43.5880694884799 | 41.9543948167375 | 42.0605906240248 | 41.0808257270221 |
|          | 39.7210115145672 | 43.0156099182214 | 43.7924421812682 | 42.3214282169749 |
| CALCB    | 41.7397731376692 | 45.6533175604486 | 43.0971787292711 | 53.593974682612  |
|          | 47.5647821785529 | 39.9397419279057 | 49.6872467499977 | 52.8622615027833 |
|          | 38.5252456306656 | 47.611018474151  | 45.8180710486329 | 42.8864415494484 |
| CALCOCO1 | 71.4276813927272 | 77.3367966395554 | 74.8071157013401 |                  |
|          | 88.6717761948382 | 62.6860949544223 | 125.036267601897 | 62.5506324864207 |
|          | 132.3192754634   | 67.1278109419819 | 140.837788264535 | 113.403020750953 |
|          | 111.760213205992 |                  |                  |                  |
| CALCOCO2 | 94.3674661847143 | 86.8262463672891 | 85.5839487225537 |                  |
|          | 92.8026641003757 | 72.5027069303875 | 128.126336084436 | 72.5956443098684 |
|          | 86.7710020879725 | 111.735319884512 | 110.334176022265 | 103.883220270094 |
|          | 95.1224420992193 |                  |                  |                  |
| CALCR    | 46.9939712192224 | 36.6968906669565 | 41.0356368374708 | 45.8844325913247 |
|          | 37.7576900881741 | 38.3418933808844 | 36.197424053556  | 37.33030683349   |
|          | 40.3316153483289 | 42.6793753550854 | 42.2618615571566 | 36.5474283500601 |
| CALCRL   | 71.2963721541702 | 61.8492980174846 | 89.1115172961797 |                  |
|          | 139.925369282704 | 62.9553576299033 | 76.1991031349451 | 43.4544762830742 |
|          | 42.8482181313226 | 43.7630587657205 | 44.3648993568405 | 63.2684764441521 |
|          | 53.9431600945419 |                  |                  |                  |

CALD1 996.520340280883 371.167168940365 320.452418537108 402.571146447946  
340.553073657744 2830.73694055758 77.518381991736 336.904716156626  
120.96329303892 1634.61795848352 1320.7894611262 2083.69812106867  
CALHM2 53.8856501960117 54.8439819445945 50.6004078448405  
73.3725472767369 55.0031529299037 104.650071846586 47.7390230243778  
48.4670130605028 52.8502823653368 75.7140064167134 80.4239296853518  
57.6860752168769  
CALM1 1453.77801653969 1163.0370991733 927.921867516809 1236.32289322872  
502.32041794318 2568.97574985073 766.647626178442 833.136660528149  
700.010354583503 2009.75680599899 1611.35913846618 1347.15664445545  
CALM2 3055.1209535841 1487.80306986156 1161.71671016964 1642.75555340648  
1311.88650141004 2257.78227736778 1591.51486001004 2854.82112538867  
1280.77934331703 2215.01815680371 1723.37649434054 2061.66570137425  
CALM3 821.013687795434 1881.7281441986 1237.93130196998 610.853753376105  
1638.16317738035 2232.61002288121 1364.06060391538 942.991198007376  
1539.35554229258 1231.77360353254 1578.32969650385 1585.90718459092  
CALML3 43.5710871617107 101.131391476546 51.3268475761593  
47.0874209746031 286.243476131448 92.681224908389 46.7100796279384  
49.3880946790306 84.0388582916959 50.22432299342 44.8872784170036  
39.9519547348106  
CALML4 87.3957386451235 93.8968899420039 94.8717345601966  
125.052841200703 113.905373770586 141.471672990444 95.4533981420022  
96.8240908274121 98.9712341137316 109.654559065946 100.326655761429  
117.869393694564  
CALML5 38.8561375693335 39.3999056968598 40.8420925848403  
32.9879066304034 46.4343327861696 43.1826328292558 43.5627649099623  
44.5029690493211 43.9450023643394 40.8049408996274 36.131485826118  
37.3600014814388  
CALML6 40.2543341073001 47.2770121962655 38.6727842796202  
44.550322123994 39.9697332660833 41.2567470068038 36.3194282084339  
46.4672637826582 45.8325181856483 42.4594149893798 36.2435874904689  
47.5025821041537  
CALN1 77.1521355570024 57.3286965007828 58.8936382809165 90.2790229242453  
62.7248529539226 62.3497263884167 70.3613168347492 59.7744650739434  
69.1641374421455 61.6084234634424 60.2550788540864 64.2084111281705  
CALR 234.408769393378 211.926421068313 209.658186168638 314.856937113103  
293.649670545233 179.214713709599 269.546586017659 264.407051461506  
287.423909789368 205.279698624867 230.833432994593 184.859183550225  
CALR3 45.5758521267508 41.8073910693411 39.3709357615493 42.9358255168086  
43.5544347011646 40.9506062495231 41.8315602975157 39.6474008369935  
39.2809305246091 38.1042454705119 40.1742127891824 44.6484005362281  
CALU 641.103199748891 221.049503614433 186.450759425396 433.320698413679  
336.490083577377 395.457351443921 150.562062400737 172.221482103025  
173.511692216696 324.936044300546 229.26498093497 368.078954546259  
CAMK1 103.808640431626 90.6852012808762 74.5886835786452 152.329124189473  
137.424708183613 293.300203370043 180.622563149455 143.952224627989  
114.483475728117 145.676955166566 136.883475451494 97.6552689677199  
CAMK1D 50.8736372975089 49.0986627051784 49.8344973836834  
81.2992152187529 44.9384441371181 57.3171834644877 74.2690269784394  
62.7950861902067 63.3315266915127 48.4890615340603 55.898892031444  
52.4396589505396  
CAMK1G 43.0930293831497 102.797268694325 129.2860308084  
335.002151198999 40.5710637884029 43.8582747295766 43.5627649099623

47.3791873993182 35.9645119596869 37.0320432433314 42.8263096141654  
40.0557788909923  
CAMK2A 46.6348258763289 29.8304689114955 32.6121532029976  
37.0732977341185 35.5220586859301 47.9503724044453 40.2154497375715  
40.4359177791566 34.2973261206803 50.7855742231932 44.7114813656401  
37.8490162439785  
CAMK2B 41.6900155285862 42.2577689927563 41.5541470778104  
42.1594905198929 44.8897737954573 40.1821097335139 42.6968849949058  
45.3494477934196 42.9449078135763 42.2265242378645 45.2765291940328  
41.8921592969155  
CAMK2D 43.0930293831497 44.5884811528117 44.7829632472754  
45.0053460050241 42.7982502551634 52.7156971154405 46.9185175407863  
47.420942961753 46.824299585607 41.2700204291848 43.2551508830106  
54.4992295592001  
CAMK2G 86.4937293696262 174.815922224726 174.216025744156  
68.3157692917711 104.220256076979 225.918246061369 95.9871941453611  
73.4331096065698 306.578554914328 224.871193467078 192.356440003154  
163.067962559455  
CAMK2N1 906.833938613875 3070.83113612925 2122.39240932934  
206.125013129462 802.650020720921 790.440637272613 1453.77801653969  
2126.41018877615 1398.21942794938 367.56843259639 865.63777294494  
666.265306908449  
CAMK2N2 43.3638918705225 39.2907645923217 35.4484652445078  
44.265834798964 46.4343327861696 38.8336427948187 38.1793598983615  
36.5393857306744 48.6494451061637 39.8873706855774 38.3684202018524  
41.6550823405646  
CAMK4 44.7915315085948 38.2263227947189 46.3121956889449 42.0102671859606  
40.2449343247539 43.3785777889265 45.7452456977857 40.931294690669  
38.3981095229401 37.7315666632629 42.7275315121163 42.1860813954352  
CAMKK1 47.9901855912362 45.9266745571724 43.7630587657205  
47.6687908290818 47.3791873993182 45.0283997415478 43.6753843488695  
47.4740726032707 42.8036731479932 45.9426591985894 42.9634662926872  
48.27609330316  
CAMKK2 35.0510338774593 54.9821263631962 49.1067959632109  
51.6869155634183 44.9936360641969 57.1752846228778 44.3440839686558  
36.7016645007743 45.4143854024453 37.6637152940566 43.4424616940528  
41.7575097298927  
CAMKV 33.5994525227062 37.8217989841918 38.6005272730664 34.3595588146954  
51.940083408061 34.8956628705329 36.4098694708483 33.8558232866797  
38.9006788676407 39.9948390976317 35.2339574411711 38.5279745308203  
CAMLG 1106.57048989685 592.399245288911 689.738256133922 860.265067346622  
877.673009984357 1263.76838179117 627.914461428624 1186.06822787922  
592.694479269186 1493.20520979227 983.972164685474 1114.15989325456  
CAMP 51.413025495745 45.4143854024453 43.7630587657205 132.760054781304  
41.9842695818285 49.4157684139858 62.6885730386156 51.8347877274018  
43.7630587657205 56.685925255591 40.9157352260901 41.9430737035925  
CAMSAP1 161.205086002542 238.077051775147 135.106756607914  
138.581471125405 112.830467116678 132.518188482163 185.378190201718  
133.810601514962 114.230358276599 173.035987237848 156.150710793563  
119.947688643528  
CAMSAP1L1 234.408769393378 106.160416826673 193.043344611355  
142.714450804595 202.154195547644 200.698372627272 158.321459945365  
238.616000665585 141.672695206961 301.904682664871 235.544416908354  
195.221917652149

CAMTA1 57.4376528157926 49.3581578587582 55.4502804236424  
61.8997157694697 49.452985143568 54.4753345912615 42.357910063876  
57.445796273665 49.7336769474446 62.1035858593388 60.9446532180211  
59.3709786862962

CAMTA2 47.1962846565261 45.0115870036541 47.0940613507321  
43.3078542962968 44.3557408297309 42.5660695551615 51.7714254834195  
43.1567024035183 38.2215591930186 43.1839109702714 50.5810338885769  
45.5800840647989

CAND1 67.2437599548936 70.3629652777935 43.0971787292711 56.6458456890715  
55.6991707857987 58.5530199658661 58.3675164086197 51.6660481331154  
77.3367966395554 63.9129423266349 80.8366627364071 76.6707262000712

CAND2 43.515290338756 50.2163892855092 48.7039705048129 50.6346949248834  
94.0532777456537 70.2553917409773 69.8505620106065 70.9702772728923  
63.2753814090696 69.7729022157455 68.7780894982816 64.3383155834968

CANT1 316.917793468502 203.092045210928 241.017227991238 282.603767561794  
267.107863045114 134.646159826262 229.992809034971 306.66244801017  
293.217518524507 211.701234819986 208.529062113623 161.890859629246

CANX 204.862161704394 158.918242816842 199.522267292552 687.011162822211  
139.08163074096 322.371597171026 146.634440537624 144.427680369554  
225.875798191473 194.689377887477 173.925818790068 204.423912426477

CAP1 3681.41904661708 2083.69812106867 2243.24648907474 2640.06306087033  
1325.2479053325 1792.42490815074 1806.22468459769 1928.53890809223  
3941.3269626913 1595.69503047506 1649.78627644882 1900.96666834569

CAP2 96.4971762611189 77.9992448636936 134.068233310299 86.3663084195994  
146.268519891864 359.185856400148 301.525915314179 110.287699369482  
106.97432416825 250.621261212308 236.536058101486 302.667538432677

CAPG 85.7983996395757 65.6721629145797 69.24946602508 185.677720870442  
53.4109882045447 54.5952754712007 88.0664425843955 99.2432911346944  
79.7882961549974 101.58345410371 94.7008981904016 82.0869179287671

CAPN1 521.710190052245 1645.71527614542 1801.44003951248 366.915943380617  
1656.16581692717 530.996217072759 1442.72006787259 1067.08316477623  
1301.07436212673 1280.77934331703 1176.37732422904 908.328776521114

CAPN10 47.8751677727227 50.5165823866945 47.0055981216687  
47.1416699964223 47.494999378108 48.1318607461064 47.5963750520409  
43.0390857698452 43.5669306063196 46.8231837782006 48.5292718280498  
46.4936313298184

CAPN11 45.8108990837624 48.7847528954724 50.3950981988762  
60.620259884953 55.3100442506299 54.4753345912615 46.9929836306816  
49.2019743609873 38.4344387289956 50.7855742231932 50.2203578628217  
43.9541718254769

CAPN12 204.477547372897 91.2107065307656 122.748811531184  
49.1786207920603 97.0055689383756 55.8938720883203 103.376225272425  
77.2048580540589 85.6441969757275 112.375316615894 66.0664586519214  
84.6435656850129

CAPN13 72.2099571536717 67.1926218405833 105.052418151358  
37.651298468202 43.3332476888305 42.357910063876 39.6535880152834  
653.089523541803 99.5901498757707 86.9626166234066 83.1184264089873  
58.112348043634

CAPN14 47.5647821785529 63.6287257620165 60.0856496605043  
39.1706564265495 42.3685136297603 44.7804080899431 41.706879587091  
48.1591264215184 43.5669306063196 75.2053836356882 53.4921736109774  
62.2025996860055

CAPN2 76.309158701514 48.9899488302637 60.3155766445629 83.6935756500468  
 52.2089306840125 67.4846787600629 46.5650556481721 65.6914955077809  
 59.198088069573 77.775644509079 66.0282565447846 63.1443731864055  
 CAPN3 49.1868644496737 57.8759339109109 52.2132783757422 60.1837189855762  
 48.6224651100733 52.260196361018 42.3194600586894 50.8160430472218  
 47.3213303943727 60.4347860127923 55.1359824959234 51.1740855632044  
 CAPN5 128.827672077002 398.229956085523 282.72662597454 72.2577390063259  
 79.271901834289 146.046179302584 336.390195295291 700.477686061791  
 229.226876896347 395.298033031033 369.877521477669 216.063990451376  
 CAPN7 62.1875461262634 78.6705291023488 79.4158467034017 72.2577390063259  
 82.9322141700549 74.6375749739389 74.0039764902057 64.120219344545  
 68.4229528414965 57.6791750431251 65.2295773603116 77.947556605547  
 CAPN9 39.8234920704779 163.280931300437 441.5479786095 41.0219290963778  
 39.3667161654772 41.9069736908705 46.2448677480802 42.357910063876  
 42.9413736814915 65.9703614596867 78.0020909283414 58.0722340887264  
 CAPNS1 727.181489302632 858.228943026906 1325.2479053325  
 651.969296681551 679.810781641519 863.082385199922 1323.73429724066  
 875.139073253298 1351.49940447914 1030.31910195147 1213.3477481374  
 781.923984640049  
 CAPNS2 50.2203578628217 374.723141438448 210.73006676203  
 51.223859150798 81.552417816742 51.1621379498014 41.4742337714895  
 57.2350830635912 154.93193897888 231.198764780818 153.258204588589  
 148.178364767218  
 CAPRIN1 107.034189847828 152.608998839745 186.655552987116  
 123.689895848613 177.29096218424 141.501071047479 141.471672990444  
 238.616000665585 187.486245101512 160.187478921145 140.01041112896  
 181.200738629391  
 CAPRIN2 115.10044062133 158.478919789334 126.911056987607  
 80.8728961146267 65.6824363141962 79.1257499539205 68.878562323012  
 73.9624143741222 82.5344501505114 114.617965877564 101.577767481269  
 99.3956523785983  
 CAPS 170.527024636624 161.422918681934 457.202737754842 56.6458456890715  
 141.852330109472 71.2787833369055 183.77850568836 380.862719539633  
 414.539381761279 341.535750991033 351.188432232165 203.373397813051  
 CAPS2 36.4564050256915 35.5310164682026 34.806104801006 35.8472302065546  
 36.7356360093603 38.5252456306656 36.5352572191451 31.3302670771182  
 32.4931776430014 39.0648733099061 40.723990462047 41.5536168238478  
 CAPSL 43.5710871617107 39.5595233162192 39.1553169409075 41.8778873678551  
 40.8270141118472 41.3012916486748 41.7656868106485 42.6450179841129  
 39.5377896745682 43.9118340045283 42.5426057453993 42.4607795638552  
 CAPZA1 52.888431709934 55.5867487811643 45.645828394758  
 72.3607760798558 53.1100587888055 48.0350549043063 51.2417443769676  
 49.6629259325705 62.0967404944031 50.007830364606 49.4878464533902  
 56.0787402018234  
 CAPZA2 827.365231733511 532.35007819883 488.908231529696  
 1084.23003918768 385.594118191769 1190.10462185567 417.086922265732  
 960.526372655577 810.201903561366 1191.93354266135 932.849256536912  
 1016.13142851085  
 CAPZA3 42.1537476443423 41.3610369241157 43.401782064778  
 41.0726336841311 41.0885562160946 41.554942319225 37.1643693306382  
 42.6450179841129 40.9901805728485 43.1839109702714 36.6298807161755  
 41.5536168238478

CAPZB 393.001025840896 318.234214341679 406.668753694984 422.237766234202  
 317.406465928295 367.158502379417 323.576613035353 428.729935028911  
 259.382584049498 304.49707512712 341.601353423389 356.503013319738  
 CARD10 126.682296930289 149.118265845458 115.530384771495  
 91.1834104205004 133.38594323309 102.711934290382 75.7342400123505  
 116.852483297949 204.490115029568 182.80711310964 175.652989203497  
 185.264053754114  
 CARD11 148.016994658777 320.812668695531 219.737294408079  
 91.7068354379889 226.057278804077 93.748984888348 192.470747766298  
 195.063474879275 239.117228656704 210.958578914607 191.979759198021  
 162.721587349434  
 CARD14 44.4669000196164 43.8495248991589 53.4088637045445  
 39.5748670524951 45.7486514056858 42.157627240486 39.8695929627783  
 43.4544762830742 55.3122077514658 42.5664883002833 41.6616444147804  
 44.1915202657512  
 CARD18 37.4554876386402 37.6383530120621 41.528370959196  
 41.3027031037343 36.9702228618069 38.8336427948187 43.9450023643394  
 34.5886782974123 39.4762546236449 39.5637454855233 35.1470994647364  
 38.6454098044474  
 CARD6 43.3638918705225 38.0226905622357 44.7829632472754 43.1847628331565  
 41.467005949568 35.314469458379 39.3585350448719 40.831207953647  
 38.9834959368496 41.8613406887824 45.1432412071268 43.6753843488695  
 CARD8 89.1632548302738 66.8026147385682 95.2915739972533 168.288592321667  
 82.0149542477384 59.9876575158981 41.8315602975157 91.8568043052819  
 56.0496524902806 84.8999904158793 70.8670844767965 55.3563533836982  
 CARD9 170.150808455621 253.072560237983 105.204861495017 224.249210397247  
 123.868848519181 102.499011190932 132.541333041312 145.791398829369  
 99.2341244350412 93.3897477314201 95.6731932757489 84.9280683258012  
 CARHSP1 823.933615182634 588.247843264181 589.18407096044  
 382.872356030213 236.595286890677 340.662853333208 999.13039066242  
 1075.04105984319 622.964590694346 332.322497133752 287.786165030406  
 402.886581458688  
 CARKD 198.288493088076 208.915145509698 208.878921620914 128.635811501506  
 235.925374041038 211.451463038315 299.136348099827 186.984157187427  
 187.862483922786 259.456935785521 274.493399403322 227.817928402227  
 CARM1 689.228901128857 608.579654909865 569.966632625157 461.123856163975  
 1119.61164710566 783.440408023061 606.378839153932 480.386431986343  
 448.383843915421 542.268540029548 507.620619345969 323.515041493836  
 CARS 95.5920087912438 121.036604456449 120.660602388292 139.554519110944  
 105.018199901228 101.693848821246 104.696298671673 128.827672077002  
 131.39588569388 128.749209040345 115.853867920678 97.7824843991218  
 CARS2 68.0700069295224 69.9767092409915 61.9293105089291 61.5515639412892  
 84.2158827857221 75.7502062965698 69.6301237585571 77.6174893940285  
 61.6839343510302 63.197604174872 65.342842101283 65.7853960266587  
 CART1 35.1307934330047 38.4330755397458 33.6816578730693 37.4223289687135  
 38.1644569189523 39.0266821712099 37.6036146841933 36.1375121409002  
 49.9162522057712 44.4652605017595 39.2542963855807 37.7526485343328  
 CARTPT 46.5549623118323 47.4076235350059 45.1569741609597  
 59.987045425047 45.2556760873335 41.7627910693483 46.0228732507872  
 44.5029690493211 41.5635499110307 47.9056710878325 45.2265319826548  
 46.5650556481721  
 CASC1 38.7537364570873 41.8848959280916 41.8751578329365 41.5464765641928  
 40.4639532172338 47.9503724044453 41.253645578517 39.4710743516517  
 46.2027193115397 47.8207974930031 46.824299585607 44.7401523707775

|         |                  |                  |                  |                  |
|---------|------------------|------------------|------------------|------------------|
| CASC2   | 50.0802438185974 | 50.7712194930085 | 53.0104469636221 | 46.8249967544573 |
|         | 45.5198200633333 | 54.8660503290883 | 44.0687697278114 | 54.6067620335514 |
|         | 55.9423752286714 | 60.9905272201951 | 56.9628808664342 | 52.1186591838715 |
| CASC3   | 169.970634268117 | 122.621100838222 | 103.746508465792 | 184.235914591152 |
|         | 159.697488404476 | 204.63343271995  | 161.870972980732 | 170.750057881363 |
|         | 166.097017297742 | 256.614982558637 | 200.401133392259 | 180.255771684507 |
| CASC4   | 104.573463811298 | 102.655050997714 | 83.247335725921  | 96.2385885003071 |
|         | 111.18019985642  | 165.496075703734 | 108.147548794301 | 85.7013212907541 |
|         | 104.900627862215 | 66.0786923699684 | 91.4786089554886 | 117.439175394651 |
| CASC5   | 43.9551059970289 | 46.7279104095328 | 43.3085358214154 | 35.8041229658453 |
|         | 49.1928206164702 | 40.9506062495231 | 47.0874209746031 | 48.272324215504  |
|         | 48.7358147030082 | 37.3687900733549 | 36.6603338274678 | 43.5738557773903 |
| CASD1   | 73.4611178120841 | 75.5775406974686 | 65.49167373382   | 59.6153684374766 |
|         | 69.493532577364  | 97.9586375307737 | 55.9276266345493 | 50.0526763693329 |
|         | 84.5998418020787 | 46.0119912782855 | 73.3321469094819 | 67.6983931011126 |
| CASK    | 151.740176274202 | 131.67159377585  | 284.105466865264 | 95.3070802596041 |
|         | 127.008218054726 | 91.4446109489387 | 162.160380044249 | 125.197314240529 |
|         | 256.071638089438 | 79.7389069715403 | 86.500678864429  | 121.449647909665 |
| CASKIN1 | 40.7609952437622 | 45.0115870036541 | 39.0775870687758 |                  |
|         | 41.6564075217517 | 42.1650127805175 | 47.5733603903505 | 39.2533668167483 |
|         | 37.4484310268909 | 39.5806465938526 | 37.6383530120621 | 39.9899430628542 |
|         | 43.6753843488695 |                  |                  |                  |
| CASKIN2 | 41.3387790895716 | 38.2263227947189 | 36.769073068743  |                  |
|         | 30.802355637173  | 34.2638875325204 | 34.1806289878747 | 36.3194282084339 |
|         | 46.3685439301234 | 39.5806465938526 | 32.9003644440608 | 41.9083581529276 |
|         | 32.4951076826876 |                  |                  |                  |
| CASP1   | 117.502489192855 | 185.264053754114 | 239.924746743429 | 547.442608452594 |
|         | 61.8757975011721 | 144.657263336504 | 95.5724734464786 | 115.577618925646 |
|         | 158.843766201769 | 117.181144429729 | 123.114162330406 | 132.81898450496  |
| CASP10  | 49.8472708021525 | 46.2677540712845 | 46.9711270147079 |                  |
|         | 48.9944486068347 | 44.8351976221735 | 44.5099734963815 | 44.7255207589606 |
|         | 46.4329203134841 | 48.2123120250343 | 43.4885245598939 | 44.0527419856743 |
|         | 45.9104478407175 |                  |                  |                  |
| CASP12  | 34.8099089553046 | 41.7337506166619 | 42.7303139017786 |                  |
|         | 37.9875302985336 | 40.7779767565889 | 43.4681646416585 | 38.4005795891396 |
|         | 39.4710743516517 | 37.6383530120621 | 40.3235655331796 | 38.4689132737495 |
|         | 45.1735152121056 |                  |                  |                  |
| CASP14  | 42.5193208629123 | 40.3384318592985 | 47.646800205189  |                  |
|         | 40.5484717678957 | 44.4489662507893 | 42.4580504587581 | 41.3594868055879 |
|         | 37.4484310268909 | 67.6983931011126 | 39.3698811593364 | 45.9104478407175 |
|         | 38.9496515344837 |                  |                  |                  |
| CASP2   | 376.141477833569 | 263.832968124343 | 221.277023931945 | 146.087016079575 |
|         | 318.846373031568 | 125.768826615813 | 243.489225650886 | 264.924262411772 |
|         | 327.729165976539 | 211.625447303889 | 181.705809767061 | 147.782301091454 |
| CASP3   | 238.246319539302 | 246.09270373893  | 177.584394977912 | 211.109957714241 |
|         | 193.262615637464 | 144.412165495719 | 276.399037769005 | 121.050369804136 |
|         | 273.460165751162 | 115.235144612428 | 125.559679916646 | 121.696160351886 |
| CASP4   | 103.199200862158 | 89.7093249557939 | 110.909109947659 | 237.359267889848 |
|         | 55.0767527801658 | 93.1850674428555 | 75.353039684456  | 78.8250642061439 |
|         | 85.5269681075807 | 77.0578241280903 | 68.5888253504788 | 87.4623442823265 |
| CASP5   | 37.1485601150873 | 46.7591817286632 | 38.5045333213784 | 91.0346886951891 |
|         | 37.8679241954337 | 48.7781962164988 | 45.223075311113  | 41.0381860307445 |
|         | 37.5469247328848 | 44.3648993568405 | 37.2892641289258 | 36.9976231206067 |

CASP6 58.9201382292404 105.287433456133 63.2779399027463 53.3967242431461  
99.1769280484821 70.1831787109201 85.0065217565876 61.0935621637178  
89.5777156320178 50.0564735608363 54.8532558909227 70.380703483689  
CASP7 57.0430104900107 75.3174199658042 59.0590113926295 66.1364624511164  
53.6907197364586 68.7871223112501 80.882176929636 60.0835531094681  
70.0335127723592 60.2165699959135 61.8613729054269 69.7095546047257  
CASP8 41.8871259674102 52.2330073838342 51.0261383607462 46.9858151779864  
45.3115139242709 41.6225742046331 41.2080274755436 42.0726170351604  
45.5178748361093 40.7594643110892 36.6298807161755 44.1148826235374  
CASP8AP2 39.6609238036815 44.2630383225933 40.0998167098057  
40.5484717678957 38.1644569189523 43.1826328292558 39.4600924554505  
38.745552403895 39.853866204927 42.0621425894624 39.5399188536544  
34.0382693188794  
CASP9 61.2691385007595 88.7605288058249 113.051477801522 92.999328769924  
84.1639779987105 65.4206801651661 92.8579489575841 153.812414753676  
76.0514378922651 114.190951215203 83.6898920876764 96.6957892186886  
CASQ1 40.3478825593224 40.4359177791566 85.8945498067934 36.5393857306744  
45.3675390992851 49.2050538150106 47.7390230243778 51.555506218204  
89.0684909049451 197.52820443061 135.308001652191 73.6512983066046  
CASQ2 48.6621527194963 44.5884811528117 38.0452862258803 37.651298468202  
38.5512429290626 998.311134235214 40.3302268293707 48.1591264215184  
41.9635525160083 407.161973433666 332.830805115112 700.010354583503  
CASR 43.6706764143908 44.2630383225933 38.8775560911841 39.6292788039793  
41.0885562160946 34.4896350146096 40.3302268293707 44.8997235283254  
44.0519245668737 56.685925255591 82.0206083292981 57.8111054584154  
CASRL1 39.3709357615493 38.1811246394237 40.0998167098057  
39.853175885492 40.3021896270845 41.5132248356707 39.1539892144371  
35.7182224415467 39.8873706855774 36.1933006350162 36.2435874904689  
36.5219488315447  
CASS4 37.55264801907 39.0894172982439 40.301483914446 79.262977183608  
41.8806343997257 46.3715909653832 37.6036146841933 37.6557714476853  
34.7722083264266 38.3092241935352 41.6336636285875 40.6614700944853  
CAST 65.0217598379984 92.6290175610859 156.844010597219 77.0262811825953  
63.5932443357808 112.316483867372 63.7002949745101 65.5820437889838  
86.9709077763908 121.92772785579 112.340869310085 118.625610664218  
CASZ1 123.739272396278 114.740276704399 127.87945182399 64.6111899743678  
139.66584446954 114.113460279317 138.666805923912 201.027801320306  
109.525921548011 149.231260844854 141.924244643825 93.8968899420039  
CAT 124.22494803053 290.261616334371 280.275836993258 235.33716196909  
168.54068375757 281.452208033175 238.164418453962 185.677720870442  
293.755623192857 180.679129876248 260.740251007349 616.265771322835  
CATSPER1 45.0985088502363 48.7084357480922 45.4865173433646  
76.6232527679845 38.5512429290626 44.1737502492846 43.1931731665131  
43.3262148375525 39.1790517315259 38.1042454705119 39.9070785037411  
40.5703581862752  
CATSPER2 2384.00264993279 1157.65264077595 1126.31998762007  
1991.4199819544 879.708199333257 772.368030410394 1649.78627644882  
3707.73750609316 792.022171185649 2721.97551918611 2357.96534075689  
1813.65521720537  
CATSPER2P1 59.2903915056319 69.7855392178808 50.0050760710506  
52.7924213633885 75.8976034525022 61.7566103867825 74.9059650336395  
93.9387650094061 70.4933405598359 75.9802606133139 73.2234405348435  
65.8959431201418



CATSPER3 41.7397731376692 38.6414316877471 37.1643693306382  
 40.4359177791566 41.0885562160946 40.4359177791566 41.0381860307445  
 38.4540849632254 36.8127605061228 36.5806287103157 37.3687900733549  
 38.3291713594599  
 CATSPER4 43.0001432913058 37.10170285405 42.2577689927563  
 39.6292788039793 44.4489662507893 38.8336427948187 33.5578650644246  
 36.2539950294089 39.0775870687758 40.1179210534118 41.4508241771315  
 39.3575468494941  
 CATSPERB 48.7646976789783 44.9370339275041 43.8495248991589  
 46.3203995372658 47.8075998240396 39.4953494583071 47.4439407315335  
 65.813547096222 40.5912213523345 46.8954576545929 46.5650556481721  
 46.2625470410195  
 CAV1 282.196234758364 181.064239330482 290.956194006554 315.880072026714  
 322.774093041134 1413.36279821142 62.6236991757723 239.272650332949  
 92.3901719424121 753.491584605447 656.355333007615 712.80113322987  
 CAV2 102.513192587614 107.094663242259 218.165286111397 81.4367600457584  
 107.348865210074 218.958199087236 57.1070449050465 74.4696354388511  
 109.889322825648 113.518333340953 129.091447141381 157.856158440506  
 CAV3 41.8833988894167 34.9732824977751 42.108130037421 36.9912468186322  
 40.7779767565889 36.0306975524309 43.6025443656008 44.293922970134  
 40.4518431978241 36.7439906400209 37.6862447187338 40.1235656101329  
 CBARA1 148.758736522703 108.649424858333 145.027715477051  
 144.813029178278 79.0039595317374 143.152895211088 166.553853424708  
 121.510087314197 279.521995263196 171.722423740869 145.741469970609  
 143.391384762612  
 CBFA2T2 53.5698357689852 52.9875116869966 52.1242102345408  
 51.0175677516029 58.1027665533767 55.4294204189628 53.4921736109774  
 56.8622704143595 61.1129808051181 66.8026147385682 61.6966068000136  
 57.8111054584154  
 CBFA2T3 38.528621456378 41.8503210829559 39.3709357615493  
 42.2674195935107 42.9775348174342 41.7627910693483 47.2131144508464  
 43.2855454938964 44.8568725629882 45.9573418095075 46.060742611045  
 42.1915582886043  
 CBFB 110.214922820817 161.422918681934 182.448444305445 134.646159826262  
 73.2607982527105 101.103458852775 138.618449365819 102.177189421378  
 156.844010597219 109.045804556923 101.954354107731 124.512081978396  
 CBL 62.1448806673973 60.0856496605043 61.8701572127817 85.0653700751969  
 67.8233625051884 62.4450952595811 55.8510296341925 67.9667104519753  
 46.2027193115397 58.9069025298754 64.9401081242429 67.6138276415458  
 CBLB 247.547769833089 277.993522959259 276.084235934753 254.322611819303  
 211.693380728047 321.26586939039 186.891912776245 300.803955139552  
 163.931827466775 258.973633899103 265.570814613305 225.53019299714  
 CBLC 64.8813495504917 170.501116810593 150.737482160358 38.4208429103799  
 231.198764780818 73.3506594385504 230.664926508522 368.005081137665  
 313.046160403661 188.900125060451 181.983177572371 126.302564098322  
 CBLL1 80.4967881959046 82.6116645182046 64.9559356780521 103.631449539809  
 100.645556491457 86.0630164348952 84.3526980051279 102.770627167954  
 115.544036763985 63.1394716239975 70.8940689219829 84.2728210732532  
 CBLN1 44.1294459089314 44.0409178714232 40.4882741869718 46.7577982595088  
 45.1137938810047 39.8455060654531 34.5633623842083 41.6466169548846  
 46.8873421271259 41.3321861371202 41.9908237694988 46.2625470410195  
 CBLN2 50.8388984085636 41.7337506166619 38.0452862258803 38.2041059863839  
 43.2484996523549 82.5956705829173 41.253645578517 42.8482181313226  
 37.6383530120621 86.3374157614394 68.0414563597154 89.5687388187015

|       |                  |                  |                  |                  |
|-------|------------------|------------------|------------------|------------------|
| CBLN3 | 106.219480656782 | 77.775644509079  | 58.9135553403521 | 73.5834042105313 |
|       | 46.5557478175976 | 75.5561597374812 | 47.5963750520409 | 63.287067794195  |
|       | 43.7630587657205 | 91.3941563889513 | 63.2684764441521 | 62.0967404944031 |
| CBLN4 | 44.7915315085948 | 38.8336427948187 | 41.8751578329365 | 42.2496337895968 |
|       | 40.6723334103791 | 40.7616966228404 | 41.5817737564592 | 40.4359177791566 |
|       | 47.4699236780425 | 47.1001757441025 | 41.5421429082231 | 39.2469742642337 |
| CBR1  | 94.9365530062692 | 75.0873720488265 | 106.912316023598 | 82.5279746006378 |
|       | 136.875335055866 | 131.727983826985 | 109.456162739433 | 69.1973371867031 |
|       | 101.577767481269 | 88.4385631861141 | 86.915098846441  | 107.585504340548 |
| CBR3  | 128.281765653795 | 94.2182728193924 | 78.080034922779  | 65.084620579901  |
|       | 85.7842344710572 | 218.354538624978 | 147.758917745955 | 110.983311402531 |
|       | 182.757684959879 | 182.685579297058 | 107.906865732219 | 81.4881766238989 |
| CBR4  | 117.20232751191  | 289.533968432846 | 180.663636520073 | 98.2447263268855 |
|       | 166.488589768213 | 145.439350995461 | 136.461760992832 | 65.3715655467882 |
|       | 171.021755568144 | 244.109166881519 | 221.598637828404 | 219.616289279562 |
| CBS   | 60.4593810615882 | 903.756866967447 | 59.7483827511172 | 131.57403028894  |
|       | 2440.77408185413 | 375.757961593064 | 195.108184885541 | 113.179313022693 |
|       | 232.77788697408  | 210.005571009784 | 75.0237373605584 | 133.314819245044 |
| CBWD1 | 39.8184668132023 | 40.0195349109823 | 41.0705134231814 | 42.2674195935107 |
|       | 38.3099344193405 | 40.2889845955035 | 38.2307941336596 | 38.8495095797881 |
|       | 38.6558726824244 | 40.769767732912  | 39.0156305603334 | 39.3575468494941 |
| CBWD2 | 46.263826584899  | 36.9994058279362 | 36.5474283500601 | 39.066284740632  |
|       | 38.6454098044474 | 42.4580504587581 | 41.5817737564592 | 39.3709357615493 |
|       | 39.853866204927  | 41.8613406887824 | 41.7272875295469 | 38.8495095797881 |
| CBWD5 | 111.954989477689 | 132.663052961193 | 106.361958225818 | 90.696780047049  |
|       | 91.6253858792439 | 82.9449579428926 | 97.8309399470621 | 91.0354017559834 |
|       | 98.7623993959996 | 74.2379710965903 | 76.0420039542595 | 134.307645598718 |
| CBWD6 | 38.5007204246293 | 41.159706131351  | 36.5474283500601 | 41.7614975630362 |
|       | 33.2021437980841 | 35.5158505219112 | 36.5352572191451 | 36.43924066428   |
|       | 37.3600014814388 | 34.6720534245631 | 35.046946054314  | 37.4554876386402 |
| CBX1  | 47.1962846565261 | 64.8903340853337 | 59.8273072817267 | 44.9370339275041 |
|       | 51.4527545197672 | 54.8265655909623 | 48.6395795163502 | 46.4672637826582 |
|       | 92.4839055864605 | 56.057906531592  | 49.2206713037152 | 60.7495043977707 |
| CBX2  | 116.852483297949 | 56.8760943789568 | 49.2458645560476 | 46.2399969315262 |
|       | 120.19033659661  | 54.3478800757394 | 123.162013735234 | 148.006731522923 |
|       | 101.337735124049 | 43.119837808537  | 43.9701242600947 | 43.6753843488695 |
| CBX3  | 97.4515987591398 | 116.596605311488 | 131.330480963914 | 154.633672616367 |
|       | 139.847976281228 | 116.35075921851  | 174.985336606027 | 112.873697337138 |
|       | 121.84142967836  | 81.9727730469029 | 85.1774859932565 | 91.1057573288203 |
| CBX4  | 102.136265168978 | 224.827414462257 | 155.492099076744 | 121.423421895502 |
|       | 157.927114480316 | 88.6287852712744 | 113.039124313172 | 166.734730009916 |
|       | 158.071355628454 | 68.8167148906225 | 107.391994714261 | 80.7227211275429 |
| CBX5  | 74.9006142438341 | 70.7003843117511 | 78.6402083787251 | 81.0057400164851 |
|       | 75.2391243965793 | 71.6050174762551 | 87.0685571351947 | 73.362936710475  |
|       | 76.5444845463963 | 58.115198353247  | 61.1801493883012 | 74.5886835786452 |
| CBX6  | 131.990661474974 | 155.855834721836 | 80.0183739952818 | 206.791464145857 |
|       | 157.927114480316 | 420.401914084346 | 232.048938339214 | 469.553640187203 |
|       | 96.3232257371077 | 183.057478637596 | 282.802560118785 | 212.062417120966 |
| CBX7  | 100.289042948128 | 142.124053129543 | 109.251112569215 | 101.867388894697 |
|       | 84.8751572193902 | 411.582299081553 | 84.9182861692273 | 101.516595046503 |
|       | 73.5541045639348 | 363.67768546508  | 329.677454924062 | 229.971492699272 |
| CBX8  | 55.3153799233744 | 60.5571721986885 | 53.9612654850046 | 46.1673159982664 |
|       | 78.258486366912  | 43.8582747295766 | 69.4677195088043 | 53.6210959113222 |
|       | 54.4059109100338 | 51.0055825931636 | 53.0177144132449 | 48.0350549043063 |

CBY1 132.117013391364 113.169111095305 96.0654949568324 72.1687283197901  
118.49449420132 134.853649092952 137.955007835039 128.146059846414  
115.001179779307 149.8814624626 136.04447103201 131.010196997585  
CC2D1A 48.7646976789783 75.9802606133139 94.3953345963359  
44.7980740332174 87.2282539094452 49.2050538150106 67.0455170947389  
85.3842287274022 97.0348634204639 79.6133633483649 79.4832790698673  
73.7335870746827  
CC2D1B 54.4140381300469 53.9634127270611 55.6195455298284  
56.4578213622965 52.8190882379316 50.2729836196996 65.644767142472  
55.1109784383525 60.7480970026669 62.5528124447176 58.4816190076338  
57.404059248727  
CC2D2A 61.2130609867477 49.4982025424177 46.9040704638073  
62.3936376596431 69.8804970538895 132.364260893831 61.2183034191703  
72.9074911694002 70.8606919488782 102.38706554984 73.9126724639466  
60.2550788540864  
CC2D2B 38.7537364570873 43.5873188565519 48.9944486068347  
47.3574589211166 45.5809132232681 40.9506062495231 48.9826868640753  
41.8417024632349 41.7627910693483 45.5776159432079 41.1638563416981  
42.1537476443423  
CCAR1 44.7044140979108 47.6229101519945 42.0621425894624 48.9944486068347  
42.3685136297603 47.8636003588181 52.8496345990125 44.8997235283254  
51.2776048338 46.1390887492649 46.4205654140754 41.863927676552  
CCBE1 189.737472782071 114.755820699611 124.469290554848 184.65212689433  
103.302837652919 77.7481370715949 179.241252961119 285.459248157609  
111.18019985642 231.990562664196 239.885284409329 182.49650467392  
CCBL1 58.5759178381027 84.0691608193405 82.5344501505114 61.2213001749372  
58.7460488758053 67.9306669919176 64.8367546135053 49.5185112777773  
66.7750249658122 273.891856200567 162.993316022946 101.627551729492  
CCBL2 66.0303950772736 77.0578241280903 70.0059240383657 60.3968750318023  
73.9986015964321 73.2751502965172 70.3935694362568 93.461049073831  
48.8067321016961 59.3923286524971 55.812813573397 75.4935574755043  
CCBP2 350.917244438732 53.9275079525238 64.2404293863468 60.4646208319121  
91.7629175712824 69.64983895075 61.2183034191703 221.383645621978  
49.7336769474446 70.3629652777935 92.8579489575841 135.138667957956  
CCDC101 81.0562186907518 69.1414574152997 102.926945888985  
78.3509756704423 131.766252431636 112.131738588405 95.6697427870979  
91.6033269431304 112.565968152932 133.127645982507 110.865092573085  
85.3431175579775  
CCDC102A 140.226992517573 86.1924491308234 74.8071157013401  
73.3725472767369 80.5437011468815 361.524083649962 62.0404348860702  
78.0020909283414 90.4957279507369 200.790001763897 207.671418362257  
140.648209468568  
CCDC102B 41.4508241771315 43.3458769998118 49.4573631027613  
37.651298468202 39.9697332660833 38.3418933808844 36.634024014558  
47.3791873993182 38.9834959368496 40.8049408996274 39.4410515050885  
42.4607795638552  
CCDC103 45.8108990837624 53.0383634135393 44.696023817801  
44.7980740332174 60.1730663840476 48.1591264215184 59.1774824918359  
51.2623287419357 45.3756389170606 49.8393069675192 42.5426057453993  
46.917149434588  
CCDC104 75.0237373605584 64.3032703931013 81.0295607064541  
61.8997157694697 56.7602749462766 100.510815049535 59.9174456081704  
91.9919654450652 79.5488891958168 76.6868184563568 73.7873098190297  
94.7718338968252

CCDC105 43.4626049853157 41.0678614026819 43.0016969050339  
47.0874209746031 45.1137938810047 38.8336427948187 41.3594868055879  
40.931294690669 37.8319142847141 38.8507804383261 36.3390947880186  
43.4709415392696

CCDC106 75.3761360028971 149.933827818309 173.308366696429  
97.3870880869036 327.238337722366 166.734730009916 220.36831243882  
100.989056102358 84.5998418020787 189.890451486324 193.395549316561  
124.998771394658

CCDC107 66.1229691315616 57.4538469832241 48.7039705048129  
57.8277957325085 65.9413235523618 85.8059456975413 52.7002314230604  
48.6441988290952 69.1129431075514 75.3333024462557 84.607833108004  
73.7335870746827

CCDC108 40.1925952773317 36.7495703772303 35.9714104962197  
39.2780515621926 38.2496050953547 38.9647316146867 35.9058393060637  
35.6194521200331 38.1548766517774 38.3092241935352 38.5668610487033  
35.6111578834671

CCDC109A 126.10194284238 104.072423445726 102.607924735378  
71.5249259772583 76.1293960715431 85.0275638433103 92.3034609409756  
92.681224908389 306.487935692954 122.099297248392 121.552188287725  
156.53223142598

CCDC109B 219.34503297115 313.921236120658 127.949712300256  
713.880440315813 86.2836002982515 442.380936516984 326.500804513133  
236.178265404264 286.340091833711 178.012676342712 146.691463448295  
219.616289279562

CCDC11 40.0557788909923 43.8495248991589 48.3847843498476  
44.4367387274922 43.2484996523549 45.8325181856483 38.0598374201407  
43.5544347011646 46.1101825640108 44.1379638573455 47.2134341420411  
40.5703581862752

CCDC110 41.8409927585705 38.0226905622357 46.4569566520107  
48.9944486068347 46.3150221024046 53.0290605707162 44.7255207589606  
54.9919060580109 38.9834959368496 42.785429206422 45.390192977585  
39.5418280570561

CCDC111 59.1311136551108 55.9269493191353 56.6888826857797  
65.524821699432 61.7566103867825 73.9456720099807 64.5722284870633  
52.1788489555942 64.2174369755376 51.1169368198437 49.9338905397767  
62.6868461044048

CCDC112 60.4593810615882 50.3586212130973 47.7737810047679  
72.4834467838798 57.6791750431251 63.2343637481705 59.8273072817267  
64.8336014343435 66.9499465764301 53.8260140375214 59.3379918468928  
53.9431600945419

CCDC113 40.9558083259517 43.5182502375207 39.1799070031819  
36.7892997857376 37.5556299264699 42.157627240486 37.3799542961839  
43.5544347011646 42.6366765186182 34.8137085420423 39.9070785037411  
41.1554481567603

CCDC114 36.7356360093603 40.9731067463382 41.0356368374708  
40.1804147506786 35.9058393060637 42.4580504587581 37.2892641289258  
43.2551508830106 40.6957787921451 41.8613406887824 44.553780984244  
36.5474283500601

CCDC115 196.322377166278 376.453560620912 435.632247999054  
221.163225922749 261.421333472097 324.994911416877 172.748740911831  
222.088653823382 294.698849594622 280.490447179545 312.045709918301  
289.332274319357

CCDC116 45.2875173643252 43.1805016690297 45.6989664108554  
42.8235313007746 44.0451487108213 43.4681646416585 57.4047331041592

44.8997235283254 46.6944238390932 42.0621425894624 45.310660704531  
42.0424641526302  
CCDC117 132.473918053428 92.8089247593564 84.2880616879945  
112.585860083115 91.3723635213821 106.679905803492 109.525921548011  
83.2240772671045 117.823678167648 97.8389686233842 110.009834478125  
101.156215957297  
CCDC12 276.550265506988 314.281125546552 397.94989372796  
331.306005726359 500.794458547464 275.611524861938 484.651969259966  
341.397811775105 411.431488342465 479.318513108472 522.49156295512  
342.387761195952  
CCDC120 195.127419251015 126.253578620746 113.6408244935  
46.3203995372658 74.2283328056604 54.0382756991549 98.1371527802953  
171.957278903005 124.56803502087 100.271925566074 95.5325488969517  
100.386011517899  
CCDC121 46.9939712192224 43.2109153553335 47.3861758958576  
43.6726153508978 43.4544762830742 52.260196361018 43.8206425661746  
48.4670130605028 45.0017158586743 47.3791873993182 43.8002456102021  
46.7182294568603  
CCDC122 41.678190413467 38.7578265341627 45.4865173433646  
42.6913548400127 42.7107928951766 41.408887993053 43.2721716572958  
46.7508829977587 43.4656637536244 43.401782064778 44.4329005595031  
39.9941474864076  
CCDC123 61.8529316708431 65.2966707319433 60.4809187893259  
57.6511495792664 80.257554904218 67.6817814091697 97.0155195562193  
105.743957034577 75.5681913475287 64.428683021978 65.8748459696377  
66.6118713143653  
CCDC124 93.0714382925187 83.7739049195868 83.955786676926  
105.234356571498 152.272399644814 152.95751212223 107.325456368022  
120.286733441947 114.136234102574 107.122319086614 109.386655134289  
90.5216273844682  
CCDC126 50.2203578628217 51.9421032049606 48.9944486068347  
46.614092935749 49.8304479381623 48.5835484742456 45.3597029614942  
47.2864663693787 48.6494451061637 46.2286164776607 51.838002904753  
55.4635297192076  
CCDC127 137.897231677665 85.7732262204681 116.949813289388  
62.6048727240291 155.174579191838 114.769498252688 143.913007288353  
66.295597720304 105.036862798568 82.8275497073451 88.3725577276628  
75.9136854087044  
CCDC128 131.990661474974 76.7710944291287 79.8773095098789  
75.2475238554276 49.9493230064613 120.980558571109 70.0567634568557  
143.399636653204 77.7907484334847 153.42135363926 162.993316022946  
148.944852825695  
CCDC129 48.8941062980393 43.8495248991589 39.3709357615493  
35.3829784221072 46.7508829977587 34.4896350146096 33.7574445386307  
35.6825474397235 38.1169703906207 38.745552403895 44.8872784170036  
38.5279745308203  
CCDC13 46.0920218698606 43.9421822132391 38.941855825269  
42.8848887336829 45.1137938810047 41.3553369544097 39.4916414839923  
43.3262148375525 44.6717213146407 45.0155543555707 43.5258090162298  
42.7275315121163  
CCDC130 537.841677481011 933.968759959712 1012.91803181784  
549.407911286514 1199.29782389306 517.104607715151 484.968116511768  
585.771656887036 639.391575249793 920.504890206997 969.805093523651  
624.51670158046

CCDC131 72.613397507717 72.6888636455541 86.9032093551446  
82.5279746006378 74.6833250738044 58.8605811695948 54.6414321010929  
63.9110569727542 108.503081044355 100.344513700137 76.6232527679845  
100.677422836631

CCDC132 48.1460386356622 44.2630383225933 45.3688612476977  
43.8524422305633 43.9937687851164 43.0860383229288 42.8149277408658  
43.5738557773903 43.515290338756 47.1001757441025 47.3941571188342  
48.2220547806679

CCDC134 70.5096706089299 48.4497719907777 52.0742951366864  
48.4916117779992 53.0419743379342 53.7442594289333 56.4809146784765  
54.1731035633439 57.4777075615651 47.7180816682562 50.7159667633757  
51.3244198342335

CCDC135 43.9309845324767 46.8954576545929 47.0474493061198  
46.3203995372658 45.5809132232681 45.1873487463472 53.1884505015411  
47.2368301203382 46.1101825640108 42.5193208629123 45.5707650534259  
45.2783024981315

CCDC136 51.413025495745 52.8264142735929 45.989212296035  
46.7577982595088 50.2163892855092 202.957014793417 54.0170817319522  
79.8264217848103 53.6446045619513 137.658868649032 143.251956814524  
100.824660338235

CCDC137 49.7188990489616 64.3312319756553 68.1780382173625  
47.2009420656854 66.5187917407182 47.4699236780425 70.2635892414678  
46.695848687694 57.1016072897358 46.441301934328 45.390192977585  
48.4535991392809

CCDC138 51.9545473262296 70.7003843117511 59.0308764112247  
51.949834638817 109.398472684587 56.1671440556142 76.1869593072029  
72.2610650652674 64.0541263553251 45.0155543555707 46.5650556481721  
53.3059058105836

CCDC14 372.525928228911 283.484056482174 272.746328542895  
183.028254350275 529.210992541911 152.630871384615 348.913213159222  
333.731080636948 209.986313475002 343.677907141241 269.745248423773  
251.803102904399

CCDC140 77.0301627655229 59.4253780950488 64.9839099669442  
86.0630164348952 74.8013460023603 64.7905331739366 81.8569832022381  
89.5130163419167 60.2614254907771 84.8999904158793 78.3542840447759  
72.8306652548968

CCDC141 35.6111578834671 39.1982470626863 44.0451487108213  
39.3750969348308 34.2638875325204 44.8872784170036 36.9355798143571  
41.1575777497576 44.619512785899 46.441301934328 37.6484782516569  
45.7562276914441

CCDC142 40.4639532172338 38.9338521051669 41.1367478979484  
41.0726336841311 48.9627346956003 37.3799542961839 41.3594868055879  
41.5464765641928 35.6970528713709 42.0621425894624 37.2018803984555  
45.5800840647989

CCDC144A 40.9999112795884 36.4505152165662 37.7895883057656  
38.3613388187252 37.5044776781216 38.8336427948187 37.762350605077  
37.491503408018 37.6685064050907 38.0078357808393 37.5303767522393  
41.1914475733743

CCDC146 56.5094373275922 60.8608693323868 125.880019627499  
63.4531374125233 72.828269171954 118.745729915256 66.5422130374814  
65.813547096222 74.3394153125605 78.59966540743 65.5386366902998  
93.3644318958633

CCDC147 46.4732328055735 42.7275315121163 44.4652605017595  
50.3127977239083 44.4031868028216 41.554942319225 55.7522234735038

41.8767957887205 45.9227107476843 44.3648993568405 43.5258090162298  
41.4508241771315  
CCDC148 37.3463875295726 34.3715326040967 45.989212296035  
43.6726153508978 41.9842695818285 40.244271403831 35.0305278582179  
45.9604707098953 49.1940901905636 38.6454098044474 40.8225507267584  
45.8546719310325  
CCDC149 41.7397731376692 46.4861258030402 49.6347864008749  
44.7980740332174 44.5668141895992 55.401776072578 41.0381860307445  
46.1673159982664 41.7627910693483 79.6133633483649 61.6084234634424  
52.5752569429057  
CCDC15 54.4140381300469 58.174555206394 53.8724557170772  
51.7739270955254 66.2366101899356 52.5330333302271 64.6446465846487  
71.9369353731849 48.5136862664526 49.461728580617 57.5430365699386  
50.2471139112912  
CCDC150 39.5676051939342 43.0227387991135 44.6032218589199  
39.066284740632 46.0977687311222 42.4580504587581 35.8227939208521  
44.1311654985682 44.8003345643334 40.8970401536578 42.5426057453993  
43.6753843488695  
CCDC153 40.2087556903277 41.2262949117288 39.1799070031819  
46.7577982595088 42.9655396732962 38.8336427948187 41.7614975630362  
46.7508829977587 37.4937394063612 43.7303813515864 41.862634402486  
37.6557714476853  
CCDC16 184.235914591152 123.841740274811 113.18951586976  
142.840631375936 157.082769443568 156.36242271528 180.349984862124  
173.694418385132 190.960237766104 145.509901200987 149.747000657513  
159.937192675974  
CCDC17 51.8781065691038 52.5868047927666 59.9690744676539  
50.378948785456 63.686652234709 51.4931742685391 49.2546642180676  
47.2009420656854 57.8772482723463 59.1496467460507 48.8744644207821  
56.1875519519366  
CCDC18 53.3343962424887 54.437526296816 50.0050760710506  
45.334106390212 54.1225249245036 50.3245489035833 52.773844004595  
62.5528124447176 62.6386437936516 45.8471859855979 45.310660704531  
49.7336769474446  
CCDC21 86.8262463672891 75.6614221167993 78.9701459806641  
71.5249259772583 129.270792739554 58.9676332048764 87.0685571351947  
99.6392844274488 78.4428909886495 55.0016608333828 59.8070012006708  
63.0266170942566  
CCDC22 44.3355304829989 50.1027491117756 51.1347974668251  
41.4273122914951 47.0954207417646 48.5835484742456 47.4439407315335  
49.5185112777773 63.955655956484 46.5650556481721 53.5698357689852  
57.0524725494273  
CCDC23 560.954913956997 542.467997217663 244.089971761037  
299.334388262225 389.248080358801 343.016541928592 663.372296297652  
451.603052501528 431.727858902449 264.718875269207 334.639325701194  
346.029336456779  
CCDC24 102.655050997714 127.596368103014 158.958308702808  
47.0874209746031 104.599492214295 62.5542376788358 123.247207157645  
176.318618244066 113.026772174726 184.964039515715 159.827302305842  
169.664184704618  
CCDC25 154.509548705054 114.230358276599 214.369365247268  
168.67163443217 88.6057390890775 270.253329297593 131.258204302177  
87.2068743613955 153.736638194572 254.199076651191 213.520663841371  
218.217851814655

CCDC26 38.7537364570873 38.3322849790657 46.5650556481721  
47.9915414951747 43.4544762830742 44.1737502492846 34.6720534245631  
42.8482181313226 40.0403898620771 43.0919221375514 37.4642807402741  
41.9430737035925

CCDC27 47.2862299990938 46.1569135229922 39.8299340037009  
38.6414316877471 44.5668141895992 44.1737502492846 53.8687221233237  
47.6952179922944 45.0017158586743 46.5650556481721 39.9899430628542  
44.1452943804044

CCDC28A 275.061444728555 146.355277438643 173.308366696429  
253.140146266702 104.486555491331 202.154195547644 242.339375770778  
158.769954040462 150.009352890706 353.213447404132 232.628747594691  
328.295200683554

CCDC28B 62.1448806673973 62.0220558452834 68.0649030501515  
68.3157692917711 132.555169949054 74.6955454743937 78.4937314423253  
64.9114266867808 79.0962508551502 66.9497120104244 57.2008272301399  
55.9283039581662

CCDC3 123.00053659939 118.143444770806 154.752920877816 109.144663527001  
142.863673914134 169.554408876006 47.5963750520409 111.240804216088  
63.7046039657949 150.649377863375 103.491711140137 69.3483108270756

CCDC32 427.199940706169 311.985010273921 192.398575159246  
515.007705025879 322.440680131096 424.085665569421 310.763904671301  
454.185408362583 362.788520130059 406.417924060562 463.022816882856  
446.162602155964

CCDC33 38.8561375693335 41.8073910693411 36.4564050256915  
32.6817359372544 38.1644569189523 35.0970060242246 43.4544762830742  
43.1567024035183 38.0213051227859 40.6022003765153 39.9070785037411  
38.9496515344837

CCDC34 98.5339473137891 279.901217752341 165.029434090892  
72.9580216367379 209.794541970107 146.372411304933 326.121479451246  
151.55043196879 178.624349589089 133.626390404589 161.603201688692  
160.950554451488

CCDC35 36.8072833828297 39.8695929627783 46.6588655218735  
41.5464765641928 47.0954207417646 45.1873487463472 42.0605906240248  
45.9604707098953 48.3119523820103 47.1001757441025 39.6403089864678  
45.0035308952466

CCDC36 39.0620487644635 36.6968906669565 42.7303139017786  
38.6414316877471 43.6587492470348 39.0266821712099 42.0605906240248  
45.2806199505029 42.7150227340364 37.3179578037963 37.5583886316038  
43.1805016690297

CCDC37 37.0320432433314 41.8073910693411 39.5450079747895  
34.1051821768421 41.5668884168669 43.4681646416585 49.1067959632109  
41.9315419791594 42.0621425894624 39.9948390976317 47.0110068985119  
40.8681871019812

CCDC38 38.0089018744739 41.7337506166619 40.7620472083159  
40.646702696033 41.6806984441849 39.4953494583071 41.3594868055879  
37.4484310268909 41.3803269429468 44.0409178714232 45.390192977585  
39.3575468494941

CCDC4 41.4727452533295 44.4581200816365 42.4804257679172 43.2504382247503  
44.3166120733789 48.1331309338997 42.5499248634774 47.0362584198466  
47.5870162399764 45.7328341667151 45.0589947942306 47.0130468198828

CCDC40 42.0532901689036 45.620219291723 42.3536549114165  
47.5733603903505 46.9058511192313 46.574682061365 38.3291713594599  
40.047314525032 42.1089765085639 40.1179210534118 40.1362682639916  
40.3691324547049



CCDC41 56.4819802857598 50.4872122867759 55.9459886217809  
59.2778887402357 64.428683021978 60.6548851977964 59.7744650739434  
62.7669079605627 79.0276852011359 52.6040246568056 55.3147456054175  
58.5759178381027

CCDC42 33.0463640202858 35.0222940937513 35.5220586859301  
35.49696651597 38.0598374201407 40.1428591998404 42.9803717121865  
41.6466169548846 34.6720534245631 37.3179578037963 40.0766543123257  
41.5536168238478

CCDC43 51.413025495745 52.3896785600751 53.3127618245672  
53.2046867327331 65.3933030211114 66.8632294055679 50.6774883370457  
57.6684494624163 75.6382797289563 40.8970401536578 46.0095710163378  
50.7487159427973

CCDC44 224.266559865201 196.561401686392 227.439319520245  
191.771063132796 345.084002073846 199.501451042641 358.194667053419  
260.740251007349 325.172633427119 290.261616334371 234.113622230498  
233.435884567494

CCDC45 206.378149389396 154.232642598588 149.260740603715  
118.762101740563 166.317689650501 142.957149812186 197.171449112363  
206.28819203182 183.126129333645 231.733564500645 189.267281390459  
206.41879845205

CCDC46 52.3432130135266 67.8208976798364 46.1335462158451  
53.7045101264881 45.1846041469628 90.4622684763614 42.106632087165  
58.2043532960091 49.84186525659 60.9905272201951 59.3615334058994  
62.3822663237992

CCDC47 49.085741080241 65.6721629145797 82.9449579428926  
49.7350276169552 99.0647786948132 63.6894484284172 85.5027511448958  
73.9624143741222 93.4180535865914 59.8130420783374 62.2200723764909  
77.1059855034406

CCDC48 35.0202257459026 42.1607322031054 38.4043916290561  
35.0448343468967 43.004943518025 44.4619248757502 36.3194282084339  
40.7311497914871 40.3316153483289 40.6022003765153 48.2910530887214  
44.5432192783161

CCDC49 102.443884864631 144.239350177363 129.091447141381  
214.281036491237 127.908440924429 116.253417059012 141.830305704504  
84.3526980051279 122.301290485889 96.6833301748676 100.663054866186  
108.855682928578

CCDC5 51.413025495745 59.0322602067702 53.3791548006794 58.5406981871153  
51.9885249508283 54.400905818898 61.8571521441451 54.9919060580109  
70.3613168347492 50.5252048155459 51.1905212004904 57.5372732453319

CCDC50 107.722626390174 151.255948388415 105.277476070937  
143.706880936186 82.4975645442705 155.617122020913 163.360824752796  
118.49449420132 103.67004664951 97.6774247176874 99.5531381996521  
149.27230040094

CCDC51 81.1350396749303 84.4596873416863 82.6983700200815  
72.0694688774804 124.664792638889 81.9983163893373 109.844156801015  
52.5098795466615 82.2694707335812 78.6859709780134 67.2575005672188  
77.3999378505514

CCDC52 41.3387790895716 39.1982470626863 46.6588655218735  
44.7980740332174 46.8674366115656 42.4580504587581 44.8643898647322  
44.6107027295193 48.1174861108648 37.5343260962758 42.5426057453993  
40.4639532172338

CCDC53 242.080992016235 234.408769393378 308.568617575909  
364.439669236186 137.424708183613 369.258587948416 253.841638589385

255.284866561352 467.884559162462 454.820452764822 356.628599887098  
384.522115820048  
CCDC54 38.6454098044474 40.716553247236 34.0382693188794  
40.4359177791566 41.5668884168669 38.8336427948187 37.0564573649223  
40.831207953647 38.3418933808844 46.2286164776607 41.1638563416981  
34.806104801006  
CCDC55 76.5505585423421 68.2521461582047 87.6178717341967  
73.3725472767369 74.6833250738044 117.699959435983 64.8367546135053  
69.4677195088043 87.6726059613969 70.3629652777935 66.4251023257203  
102.49785018292  
CCDC56 462.105603187328 435.094968715663 438.681666410245  
285.053017606956 414.539381761279 347.003621791919 523.031300344992  
698.595302020108 683.099079617304 518.527535205975 529.650395907046  
482.238595345574  
CCDC57 43.0462952354436 46.4569566520107 42.7303139017786  
40.9141850646578 51.4092491522288 42.808889470973 42.8036731479932  
49.3880946790306 47.417512242919 45.9004543328976 47.9942520395434  
44.6032218589199  
CCDC58 113.704541686372 84.6158251687884 76.2533853403813  
58.3475983630509 231.824347524066 72.4651758215622 199.404836798715  
62.6984594468418 165.311139930529 43.9450023643394 96.5451512198207  
119.512426152446  
CCDC59 417.086922265732 683.75696650704 462.762837284748  
602.441843384617 592.010988342149 635.050535522135 748.913487947791  
415.251775687794 646.791777335656 443.863346367342 416.246271724181  
534.881442644054  
CCDC6 1319.32406112346 583.690350347288 691.94603958547 587.88126282119  
376.749116251503 638.848775860866 339.52415679299 537.213035625492  
786.57695312967 897.198663109723 741.908952472992 622.435313940734  
CCDC60 42.9104454767916 42.8542642792862 44.2405728317107  
45.1944222548351 41.9842695818285 69.8832723783498 41.3594868055879  
46.2779564481158 48.2123120250343 67.8233625051884 84.5267954034597  
53.655233033193  
CCDC61 36.4564050256915 40.8880530359822 46.7508829977587  
38.2041059863839 40.5710637884029 45.3882138838137 40.0052661202207  
40.931294690669 45.3756389170606 32.5178504369282 41.8168470823451  
40.3691324547049  
CCDC62 41.1523487516364 48.1392888470269 44.3648993568405  
42.2496337895968 38.0170438383012 43.1826328292558 37.0564573649223  
45.5842286511645 42.7150227340364 44.8536205629296 44.2925355984056  
40.3316153483289  
CCDC63 42.7150227340364 39.3999056968598 41.2365089689635  
41.4273122914951 43.9450023643394 43.5752393599169 40.2154497375715  
42.357910063876 40.7847110517594 37.920964499903 37.9946685306274  
39.6352613956998  
CCDC64 43.844855336215 42.5269793679335 39.8299340037009  
49.7350276169552 43.4544762830742 48.5835484742456 44.4639405506967  
45.642304356051 45.4799270968969 39.3698811593364 46.0095710163378  
42.2577689927563  
CCDC65 37.0320432433314 41.554942319225 34.6977013306396  
36.7892997857376 36.3390947880186 41.554942319225 37.1643693306382  
38.4540849632254 37.1820543575123 39.0648733099061 39.6403089864678  
37.4554876386402

CCDC66 50.7390160399184 68.5251167137806 64.3312319756553  
53.8086134112366 68.7911855725594 90.8335894699136 67.5206810636627  
71.1607965028029 74.4365426051588 59.1496467460507 64.830448408529  
71.501028931626

CCDC67 38.0089018744739 42.9358255168086 39.9101908547397  
41.3027031037343 41.467005949568 39.4953494583071 44.6032218589199  
40.4359177791566 37.8319142847141 38.0078357808393 38.079222289614  
36.9976231206067

CCDC68 46.0398513158469 52.8455400026194 43.2721716572958  
46.0228732507872 41.3387790895716 70.7003843117511 45.8980298854198  
46.9454141780379 51.3084273211359 64.7488184936482 58.6464918752765  
74.2180011215707

CCDC69 39.3709357615493 40.0527893189096 33.9435456570176  
43.5627649099623 42.0709558258414 84.4433277732938 47.1345949868029  
39.0620487644635 37.3600014814388 64.1097859982912 60.4620008899889  
62.58750768974

CCDC7 38.1644569189523 40.591923288644 42.3536549114165 40.9022255200169  
41.6285300488826 42.9695585740813 41.4244721780607 40.3662560853635  
40.3566407936735 43.6033221838149 41.863927676552 37.9607839934735

CCDC70 41.6354649482853 34.0382693188794 35.7105247506212  
37.5382094267692 38.8456942580061 40.9506062495231 41.1507980856436  
37.0390589468421 40.0403898620771 38.745552403895 39.6403089864678  
39.4490233720848

CCDC71 68.8698243753339 74.2653431904071 44.8872784170036  
49.3654837541353 60.0736861987141 55.7197525213035 74.1353964055485  
41.0381860307445 70.8606919488782 63.5107036952143 62.0404348860702  
59.4465684293847

CCDC72 1208.33498233518 1259.2978319548 1119.61164710566  
1083.50383916482 1676.22158135012 1214.73798692268 1792.42490815074  
1012.91803181784 1850.06063216244 838.974043046676 1075.04105984319  
1382.25775340179

CCDC73 44.2350046179299 34.0382693188794 40.0998167098057  
40.1804147506786 36.8059561571675 41.159706131351 31.8431345631453  
40.931294690669 40.7847110517594 36.6893251782922 41.2598458726002  
38.745552403895

CCDC74A 44.436995101921 45.7317208802318 47.646800205189  
41.8778873678551 64.193536444915 84.7113556042844 43.4544762830742  
43.0390857698452 62.4776210012906 61.3529667465225 65.485076402841  
71.9369353731849

CCDC74B 39.4710743516517 40.9731067463382 58.7382738968248  
41.5464765641928 46.0043807840705 52.7156971154405 43.9450023643394  
46.0633179231318 44.8997235283254 48.9826868640753 55.0404566626821  
44.2527566343661

CCDC75 48.1125722136997 46.6314009405034 48.9944486068347  
37.8442841690502 48.3814421939888 46.8954576545929 47.8947595316832  
45.2806199505029 46.1101825640108 48.6124127998952 39.6403089864678  
43.0930293831497

CCDC76 102.863599315528 140.853812988562 120.508644792138  
85.5959901987745 128.532373805894 118.745729915256 100.499763255098  
86.0944261788554 109.374838860558 115.98265270452 135.580139597457  
126.500059295217

CCDC77 168.91210897306 116.805376997045 78.0013795192762  
95.3070802596041 165.797721197832 83.5274372175811 158.081235081686

173.262440365651 146.789051265805 120.129857395808 118.467231612638  
97.822911929574  
CCDC78 42.9641759692926 37.920964499903 42.5406888281114  
38.6414316877471 44.0451487108213 40.040778349137 38.1169703906207  
38.3269307390572 40.4997186069494 42.6366765186182 38.1835938174625  
40.716553247236  
CCDC8 42.9104454767916 40.3384318592985 44.6032218589199 65.524821699432  
43.7517118200398 47.2009420656854 39.8695929627783 45.0972184964705  
36.7267557061938 53.3059058105836 47.2134341420411 46.6397391251762  
CCDC80 48.1125722136997 46.1131345131683 42.0621425894624  
46.2462906014337 42.6575535390785 136.517445122438 41.9393838138203  
42.1860813954352 41.3803269429468 64.5845827915699 50.7159667633757  
52.5420632648124  
CCDC81 50.1533437545239 44.5884811528117 44.1452943804044  
41.0726336841311 51.4527545197672 48.3686935595826 42.629412460409  
39.5466975353131 48.7358147030082 52.0999467564713 47.5439485437351  
51.7833333848627  
CCDC82 41.0608773166058 38.8336427948187 37.4642807402741  
39.853175885492 39.4693871570028 37.7000400506818 37.4772922422734  
39.2672712041774 34.1294694030979 43.7303813515864 40.4504608195666  
40.7704587752083  
CCDC83 41.7397731376692 36.6002100641539 36.9795961564828  
38.2041059863839 40.3452320167286 35.5158505219112 39.3585350448719  
39.0620487644635 38.4344387289956 38.957687788868 43.844855336215  
37.7526485343328  
CCDC84 153.028210322286 198.15553991394 235.544416908354  
130.274451794636 130.002385558757 167.49597550111 153.019365845424  
166.304210248623 152.86270446968 252.206029058968 199.23413224268  
136.011269830829  
CCDC85A 39.5676051939342 39.0102066700839 43.4709415392696  
38.5252456306656 38.3085139808968 40.4359177791566 39.2010256871265  
39.853866204927 38.8495095797881 39.8455060654531 39.9586075662602  
38.8964578286293  
CCDC85B 42.1537476443423 45.0115870036541 36.6522278218553  
31.3142073726046 43.9450023643394 45.8325181856483 44.9863726205428  
40.2382908228517 35.6970528713709 41.1222709786153 47.0110068985119  
44.9070250604284  
CCDC86 193.730784033221 340.311633794489 261.929727465462  
146.573018487871 943.73554571528 276.550265506988 539.879151334921  
343.50519530761 252.134800295199 236.178265404264 231.733564500645  
219.34503297115  
CCDC87 39.7576136507593 39.0102066700839 34.1806289878747  
34.8137085420423 37.4470183315826 41.6590564937735 41.5817737564592  
37.5511560880902 34.9428206949566 40.2112371512838 39.9899430628542  
35.0222940937513  
CCDC88A 51.0225132036905 53.3094843669564 62.7605715573218  
83.014860007187 48.7288537840562 62.5542376788358 69.3468840908665  
69.0819394834919 79.2824265044758 79.1074681877535 62.358854072801  
49.5539622682049  
CCDC88B 45.6517320730042 52.3187919317561 58.7382738968248  
108.246687420741 53.6907197364586 50.0748292497578 76.4889974392545  
60.5571721986885 52.0583273941813 53.7196173866021 57.8991270166934  
54.7953298048942

CCDC89 68.3234331335073 67.7189686993694 89.8354888041611  
69.8314582428552 59.8102324370568 61.8187341713197 60.0981687048269  
49.8344973836834 47.0804681460898 72.42732668079 55.9604109457703  
61.0025829061063  
CCDC9 54.7786516309154 44.2630383225933 45.1569741609597 57.8277957325085  
52.5645416722441 43.3785777889265 49.8281348927244 42.7431359850339  
41.863927676552 50.7855742231932 51.524711857679 49.3984571719129  
CCDC90A 419.182443507848 142.365344693239 170.327588764719  
189.769786121649 272.315378390681 200.144817111902 245.0324923457  
327.238337722366 250.244199415895 158.308338986864 132.973097496421  
170.327588764719  
CCDC90B 347.074754731148 320.555790243104 363.67768546508  
323.957165066178 193.043344611355 282.262229126907 414.794323433931  
376.141477833569 290.546420262364 289.843931942051 223.219262492785  
344.44626908553  
CCDC91 56.1538818251632 60.4275887778048 54.0536858212253  
67.6034960135297 47.6153629331146 103.43536623122 70.0868449397269  
50.9099078696349 69.5741225986433 65.1516921033166 58.0295642638519  
83.9236799134394  
CCDC92 371.709014310561 322.774093041134 335.330937634207  
260.062749979574 169.459466601559 522.377154567257 349.371668774717  
277.548019244696 177.535502927617 381.198152331624 369.258587948416  
301.79813401066  
CCDC96 46.9939712192224 47.5647821785529 47.5673419710251  
55.0604256312495 44.5668141895992 50.3245489035833 44.4639405506967  
52.9813204449021 52.1788489555942 40.1179210534118 46.8954576545929  
48.0350549043063  
CCDC97 137.156113501125 143.391384762612 98.5746416750459  
147.033637977077 182.685579297058 116.51037006692 150.562062400737  
160.264217082275 175.619398238068 127.345094323724 121.936597605894  
104.335120306753  
CCDC99 101.351907645804 95.5627648703794 87.104092810486  
68.4261608261522 144.290966198687 82.8218647837178 86.9185256838836  
106.51488068372 109.241121384212 53.8260140375214 57.7786197537899  
72.4094549259929  
CCHCR1 37.2474303302343 35.6434124419782 43.8495248991589  
39.3750969348308 33.143488395779 36.3845892764084 35.6056062164318  
34.5886782974123 37.4540772310118 35.6208308220005 34.064698871541  
42.7782216342806  
CCIN 39.6609238036815 40.2493681589104 42.157627240486 48.309866878365  
40.4639532172338 42.9695585740813 42.8684958525042 43.7396619462033  
42.6366765186182 42.3606390470387 41.3553369544097 43.8575940017119  
CCK 40.0557788909923 35.7393138893354 44.0451487108213 36.0481934423077  
40.4639532172338 42.0574848021044 43.3262148375525 39.853866204927  
41.2870505273664 38.528621456378 34.6366195121669 38.1421709520616  
CCKAR 40.9558083259517 34.6306468196142 37.1643693306382 42.8235313007746  
42.9090346219023 45.9266745571724 44.2166118829877 40.2382908228517  
37.3600014814388 38.0078357808393 43.1931731665131 37.0953622406687  
CCKBR 46.263826584899 44.3529919625344 43.1931731665131 40.1804147506786  
37.7576900881741 36.1190722948669 41.8315602975157 41.8417024632349  
40.6957787921451 38.1042454705119 41.5421429082231 38.6454098044474  
CCL1 40.148780650831 43.4396866157171 39.1799070031819 51.0175677516029  
41.0885562160946 36.4986986135769 44.3440839686558 40.5158867964016  
43.7630587657205 34.3674468322242 38.3684202018524 35.8429598823818

CCL11 80.6434122355417 43.9421822132391 40.0998167098057 63.3006977162657  
47.4548471240051 42.357910063876 39.6535880152834 50.1833483241864  
43.5669306063196 35.7202909649682 35.9563099719284 37.6557714476853  
CCL13 55.8218917166321 99.7361599442168 113.051477801522 190.442443946259  
59.4830424460714 89.680151549258 98.7446830481164 75.4272782742534  
47.9035532886869 42.4594149893798 51.3103617600342 47.6040671292013  
CCL15 42.0532901689036 44.2630383225933 39.6833800000587 77.5091723127198  
43.5836473788312 165.411942074375 40.9157352260901 54.2301964914419  
40.4220196471124 92.2857885595617 105.406282523992 105.05842887748  
CCL16 41.8409927585705 37.10170285405 38.7745734037492 45.1944222548351  
37.2567512265363 38.6414316877471 39.3585350448719 42.4580504587581  
39.0775870687758 43.401782064778 38.1835938174625 45.2783024981315  
CCL17 40.5654775358427 50.2696827764943 70.7238101239421 132.205423909251  
43.1252272136667 42.6575535390785 47.7390230243778 43.844855336215  
37.2810767789306 43.6033221838149 38.3684202018524 43.8575940017119  
CCL18 40.2543341073001 42.2577689927563 46.4569566520107 124.611407530723  
37.4470183315826 36.0306975524309 50.5252048155459 34.6977013306396  
30.9728654320265 33.1559412791294 32.775958132716 35.0222940937513  
CCL19 46.0920218698606 98.0023132593711 75.9174504780598 369.952313383216  
41.1868052124344 56.4819802857598 51.9421032049606 217.658421476562  
46.4164127487052 60.7495043977707 48.2910530887214 43.2776458914333  
CCL2 721.266942608349 310.255767356827 97.1271615802556 1704.0522304387  
268.097966292089 2083.69812106867 111.714563124738 962.079396754147  
92.5512757064631 96.6833301748676 198.872002827342 220.743173420176  
CCL20 61.4884606677516 45.7317208802318 155.018308238778 895.110715324701  
72.2665537421443 47.7556758818053 193.15756263121 91.8568043052819  
42.9020321355927 40.1179210534118 41.4508241771315 49.3984571719129  
CCL21 77.0301627655229 64.8903340853337 47.0055981216687 478.566247444176  
48.2748123114598 389.686780706341 38.2933870238743 69.8941497035747  
46.2027193115397 98.7331384143685 148.514056973195 150.362006499825  
CCL22 46.7293238583888 64.5347406608537 70.2577825186943 235.222472959869  
51.1368583672022 42.357910063876 53.3111230705754 58.3046521633424  
53.1249776278067 41.8613406887824 38.956280281655 36.9976231206067  
CCL23 57.5685357492202 48.0570064280814 55.7764940944098 133.365282773876  
50.7116312517035 76.5339970774168 60.581035231763 56.9621724830201  
46.824299585607 56.4553747079294 57.6831182451733 61.1022920882065  
CCL24 33.4240466670776 40.8880530359822 35.8265993915844 39.2780515621926  
40.8873907150245 38.7340969861754 33.4316681623175 40.6171774724171  
38.2215591930186 38.957687788868 41.3553369544097 38.6454098044474  
CCL25 43.7585538437696 41.5132248356707 39.8299340037009 44.265834798964  
40.5235471987417 40.040778349137 43.6753843488695 39.512606833112  
40.6503965580437 42.8936990772838 41.862634402486 41.3803269429468  
CCL26 69.6449298794042 40.3384318592985 46.6588655218735 51.5913529948887  
39.7568367479301 55.1987351219665 44.8643898647322 42.9301944191913  
49.4786466722535 50.22432299342 48.8744644207821 42.4607795638552  
CCL27 40.3478825593224 38.5252456306656 44.9758339877851 45.1944222548351  
41.3755760434934 41.9543948167375 45.6042625176633 45.1714698794331  
46.1101825640108 42.2614524730856 39.4410515050885 39.5418280570561  
CCL28 52.1646670865427 42.4493032770053 47.1719672813096 40.9022255200169  
69.4009439491061 44.5973052166071 48.7338046695859 40.2906799807722  
56.8373628733077 47.611018474151 43.9701242600947 45.9693232070002  
CCL3 164.262531918679 85.5135159896819 207.464632062656 2374.1766901821  
71.2787833369055 115.235144612428 595.012422454829 118.736188485344  
59.5929655877036 55.7930787690756 45.8180710486329 50.379587451669

CCL3L1 79.0304119352941 58.9656737189764 95.5724734464786  
1810.67209360676 44.7312617135491 59.3618843678775 207.768377497439  
68.580705761277 47.30559806758 43.401782064778 44.7699099047043  
46.1005394461164  
CCL3L3 235.888544042065 153.139323479953 372.131471268346  
6555.04068292972 70.5676924620725 146.007510897838 925.486088550061  
256.026804821501 73.0403099404 52.4351670989268 53.1505787220552  
49.8253396161069  
CCL4 40.3478825593224 43.4396866157171 40.931294690669 41.1886975241176  
41.3755760434934 42.750861693377 38.6243997507646 39.3709357615493  
42.992884918158 42.1622837416589 38.956280281655 42.57175366709  
CCL4L1 51.5888395924843 53.6429962450784 64.9072331703985  
1180.7204565402 40.8873907150245 56.3525213736952 110.837476359817  
88.5511408870489 50.4974478884077 48.2596564318071 46.824299585607  
42.8864415494484  
CCL4L2 81.7117547901526 60.7495043977707 93.7782490229256  
1423.29307392266 47.9707112435212 110.935994444429 157.9970294734  
90.9010016862442 48.5136862664526 44.4652605017595 54.113533179847  
43.8336862998829  
CCL5 312.154320305976 312.795596385258 508.688028777582 1012.0373748933  
90.2227706363325 161.603201688692 223.397586938079 282.68881112438  
80.8728961146267 317.127679512963 812.386878774445 111.071209057746  
CCL7 43.5710871617107 44.6918600441328 42.0621425894624 90.0942781313264  
40.8873907150245 44.2607789091176 50.2016912396771 41.4508241771315  
44.8003345643334 37.920964499903 45.4799270968969 39.4490233720848  
CCL8 456.992521713593 130.775349446374 95.0738959950301 533.820505121067  
69.7413896580273 880.992328229414 113.866742186841 225.690879436355  
52.4539007817929 53.0357938671646 45.9104478407175 51.9447450229707  
CCM2 293.516547661658 174.179617483251 191.141778714144 243.763402918148  
165.613176704286 181.064239330482 149.02612008344 175.74424749223  
186.350104132737 172.748740911831 188.767243497644 146.763378089693  
CCNA1 49.3463416794995 41.4508241771315 45.4865173433646 82.5279746006378  
46.0977687311222 50.2163892855092 81.3082994649699 62.8885806455128  
52.1186591838715 42.0621425894624 45.0589947942306 46.3411353377615  
CCNA2 102.25509551881 224.14182624489 148.906660152784 83.877343750194  
355.00914527669 72.3523300799007 226.553946570328 109.241121384212  
273.320144423733 43.1839109702714 42.170702295259 50.656598108034  
CCNB1 71.4276813927272 75.9802606133139 62.0967404944031 53.593974682612  
131.045615546105 47.4699236780425 74.0039764902057 78.0020909283414  
82.9256976863272 41.1222709786153 50.6473771879221 43.9541718254769  
CCNB1IP1 176.936216428226 137.744037647063 114.901312275861  
99.3396385536245 127.160252453685 145.936763882526 115.213198315106  
100.370937669662 120.571680725698 161.65846687852 173.035987237848  
171.485221601137  
CCNB2 411.114836576804 352.917938567734 136.657213529097 110.25582862843  
586.281182112872 104.492750153479 612.843402058384 434.523449093691  
583.053232396803 43.1839109702714 41.4508241771315 52.1186591838715  
CCNB3 37.7766325325437 44.4612332327353 42.4580504587581 41.8347680672208  
39.2192721306168 41.5104252657176 39.0735041982358 42.5435283762933  
42.357910063876 38.2599935139101 42.5426057453993 40.1249533205858  
CCNC 93.6464901357407 143.932614622477 128.937837181433 105.647054678056  
78.4692960800668 130.585540374294 87.9638809147835 80.2680308979464  
94.3953345963359 62.7777335817742 64.2174369755376 102.365615739399

|         |                  |                  |                  |                  |
|---------|------------------|------------------|------------------|------------------|
| CCND1   | 1626.71747158994 | 4916.82166008511 | 7022.41612496714 | 551.490493022416 |
|         | 4482.5285743878  | 1266.41536472956 | 309.494842450837 | 862.031722874406 |
|         | 16661.6081002448 | 2108.03351084959 | 2091.0611913538  | 1188.3486464341  |
| CCND2   | 492.519023728038 | 324.936044300546 | 230.633139180542 | 701.935442033195 |
|         | 119.965950077259 | 1539.35554229258 | 89.3868257841517 | 335.943994595615 |
|         | 69.5000200266713 | 1144.34555072807 | 876.959744461441 | 743.463635670141 |
| CCND3   | 817.631505579476 | 646.323419285676 | 1114.15989325456 | 1202.11455437028 |
|         | 637.694633519528 | 716.434968700383 | 824.946988188872 | 597.593714375156 |
|         | 549.67905283016  | 901.793120584383 | 828.403901345618 | 652.480459437977 |
| CCNDBP1 | 245.356135592468 | 397.199620114138 | 235.127539195661 |                  |
|         | 368.853558193357 | 266.439343650315 | 317.777971035617 | 319.871452890512 |
|         | 268.35323266566  | 283.484056482174 | 308.841311505431 | 284.351747562807 |
|         | 461.500892766266 |                  |                  |                  |
| CCNE1   | 193.15756263121  | 134.936657884035 | 108.242021650278 | 55.8709511400674 |
|         | 261.081844108932 | 74.2122914028677 | 301.728842562175 | 355.495119544081 |
|         | 116.9812483023   | 58.6652401079158 | 54.1683282066029 | 51.7460357029749 |
| CCNE2   | 64.893664076381  | 64.0605738099971 | 52.4234283832574 | 54.9919060580109 |
|         | 107.693162310852 | 49.3654837541353 | 87.3957386451235 | 50.9099078696349 |
|         | 94.0532777456537 | 40.7063426028871 | 40.4094901248527 | 45.2783024981315 |
| CCNF    | 234.727123301682 | 226.456072107079 | 316.548339196872 | 94.9785931907153 |
|         | 309.698059657254 | 74.2690269784394 | 273.231509963261 | 173.262440365651 |
|         | 333.122044191102 | 332.933704863586 | 183.311305255895 | 115.441414762268 |
| CCNG1   | 83.877343750194  | 91.0526311350893 | 143.913007288353 | 65.6260887743331 |
|         | 101.156215957297 | 165.496075703734 | 129.2860308084   | 88.9038123445083 |
|         | 124.310823604006 | 115.853867920678 | 101.383978726419 | 205.510539955583 |
| CCNG2   | 116.9812483023   | 150.661852768073 | 82.0081006332668 | 70.8835636550472 |
|         | 91.1834104205004 | 70.7238101239421 | 82.5050369860039 | 105.589475270494 |
|         | 131.645714321903 | 77.707180044659  | 78.1623301184313 | 86.6854406823303 |
| CCNH    | 68.021673481871  | 66.0282565447846 | 78.2484708472671 | 162.782568037255 |
|         | 77.1287755867582 | 84.7113556042844 | 78.4023698691285 | 84.7058085717914 |
|         | 89.9789975503195 | 70.6138659908885 | 63.9029785089421 | 83.6610321130843 |
| CCNI    | 4898.89844391477 | 4406.55576617324 | 3653.59181300011 | 3234.36469403715 |
|         | 2465.65854657837 | 4916.82166008511 | 3190.0108307463  | 3391.65926812276 |
|         | 2220.90215179682 | 3490.63949257581 | 4665.45637589484 | 3575.78813099057 |
| CCNJ    | 44.9896851005259 | 43.683792219729  | 45.8844325913247 | 42.0102671859606 |
|         | 44.7829632472754 | 44.2607789091176 | 48.0283573444179 | 45.3872406432794 |
|         | 53.0357938671646 | 39.0648733099061 | 46.5650556481721 | 50.656598108034  |
| CCNK    | 345.615640348066 | 230.117814622646 | 294.51382100172  | 306.174148874454 |
|         | 230.169916252549 | 191.291480830946 | 202.872083191114 | 335.167786298149 |
|         | 379.933650669101 | 314.992390390165 | 248.924819383887 | 335.943994595615 |
| CCNL1   | 156.754606475323 | 387.311743342483 | 245.660544821992 | 489.232537791775 |
|         | 280.202284365004 | 472.159979716705 | 263.937966521917 | 243.803668806533 |
|         | 153.626578526803 | 179.897685693038 | 206.931452638325 | 259.43283734195  |
| CCNL2   | 44.9896851005259 | 55.0190472891348 | 56.0800798275077 | 47.0874209746031 |
|         | 71.0204234759627 | 41.2567470068038 | 54.1113282154394 | 48.6441988290952 |
|         | 62.9922928277769 | 47.9056710878325 | 48.1352470945488 | 46.4136802014079 |
| CCNO    | 47.5647821785529 | 92.6169846049935 | 68.3234331335073 | 35.0448343468967 |
|         | 73.2607982527105 | 44.8872784170036 | 84.0691608193405 | 76.4637616585578 |
|         | 107.420552630045 | 89.07557840469   | 85.2598847559951 | 98.403191200835  |
| CCNT1   | 59.046385957117  | 51.7983110178095 | 58.637422084759  | 69.8314582428552 |
|         | 54.2301964914419 | 67.0290776715331 | 60.3928833351886 | 56.9299697426319 |
|         | 56.1733549054832 | 70.3629652777935 | 69.1945249877407 | 63.6254894053045 |



|        |                  |                  |                  |                  |
|--------|------------------|------------------|------------------|------------------|
| CCNT2  | 78.1313732870053 | 74.1425714439424 | 76.9671788424922 | 56.9299697426319 |
|        | 69.6554376880691 | 63.0119737420787 | 55.3141112947345 | 70.1347490781514 |
|        | 97.1634390603131 | 73.2956678446902 | 81.0295607064541 | 81.54661427144   |
| CCNY   | 115.801367301965 | 138.82907142482  | 132.425058995617 | 116.20672562701  |
|        | 180.916465721523 | 235.420582508332 | 142.192315159235 | 140.992072231913 |
|        | 120.26537515666  | 114.073853703538 | 123.536432289877 | 128.391264770998 |
| CCNYL1 | 65.8703820581684 | 63.2475738480323 | 69.8712342353417 |                  |
|        | 100.271925566074 | 66.4047895961325 | 74.4508307047509 | 74.0039764902057 |
|        | 67.1702819938085 | 79.7061415085215 | 53.4785152499923 | 52.6960621424156 |
|        | 64.6945454069792 |                  |                  |                  |
| CCPG1  | 177.845412804098 | 74.8071157013401 | 89.7661004674344 | 219.771890732457 |
|        | 60.2276476399612 | 163.476051754305 | 65.0031119608637 | 84.2434917159728 |
|        | 70.7702047405718 | 146.249568587351 | 106.340844838265 | 134.697808298417 |
| CCR1   | 79.0304119352941 | 49.4067286971348 | 45.5883690965192 | 293.755623192857 |
|        | 48.3814421939888 | 76.7063975550116 | 46.5650556481721 | 45.2806199505029 |
|        | 40.9901805728485 | 42.6793753550854 | 48.2910530887214 | 49.8253396161069 |
| CCR10  | 46.3390850717989 | 46.1569135229922 | 43.4709415392696 | 41.4273122914951 |
|        | 41.8806343997257 | 39.6251842352088 | 51.5967098638347 | 40.6171774724171 |
|        | 45.1899271235974 | 46.1390887492649 | 44.2925355984056 | 39.0536056496869 |
| CCR2   | 43.1131704517186 | 44.0559121083962 | 43.0602678767669 | 86.2118355769367 |
|        | 42.2321685526192 | 39.3841861812262 | 41.4742337714895 | 41.7022936121242 |
|        | 40.6440776327492 | 43.5554751425009 | 42.152777131319  | 42.4121858888871 |
| CCR3   | 45.6517320730042 | 42.0500582486532 | 45.0115870036541 | 59.198088069573  |
|        | 43.1252272136667 | 44.6524308640784 | 42.2577689927563 | 42.0847226073592 |
|        | 40.9460396298042 | 44.4652605017595 | 42.2618615571566 | 40.9683275553869 |
| CCR4   | 40.7609952437622 | 42.8542642792862 | 34.5718473203083 | 59.0965219753805 |
|        | 36.4434672195785 | 36.2015763253919 | 39.5496902678788 | 37.86982638952   |
|        | 40.7847110517594 | 37.4302011516587 | 39.2542963855807 | 39.6352613956998 |
| CCR5   | 39.6292788039793 | 45.6271294527191 | 38.741573807882  | 39.6292788039793 |
|        | 42.0709558258414 | 41.2567470068038 | 42.6913548400127 | 38.079222289614  |
|        | 38.7571208777225 | 36.0144420013819 | 38.745552403895  | 42.6758568421347 |
| CCR6   | 4482.5285743878  | 2266.34088015654 | 3143.97163345458 | 3114.05035137552 |
|        | 2581.34849558524 | 1780.14552702126 | 3490.63949257581 | 4569.48246031279 |
|        | 2150.8715161597  | 4168.41947709165 | 3869.93390477952 | 3329.68037676265 |
| CCR7   | 43.1805016690297 | 760.745188431719 | 105.965906809429 | 293.649670545233 |
|        | 51.6869155634183 | 47.8636003588181 | 156.311985997533 | 80.5508300225954 |
|        | 41.5635499110307 | 50.5252048155459 | 49.1067959632109 | 42.8864415494484 |
| CCR8   | 39.6609238036815 | 42.3550738181144 | 42.7303139017786 | 40.1804147506786 |
|        | 43.844855336215  | 43.0860383229288 | 37.2892641289258 | 37.5511560880902 |
|        | 41.4636047919453 | 38.6454098044474 | 42.7275315121163 | 40.1700117452801 |
| CCR9   | 30.9241129241985 | 37.1685072112618 | 38.941855825269  | 33.5947667322717 |
|        | 33.143488395779  | 39.0266821712099 | 35.3362091871364 | 36.6452480995946 |
|        | 38.2874316439311 | 31.036133494654  | 39.1878770155069 | 35.4484652445078 |
| CCRK   | 105.914573205761 | 89.6389968279976 | 72.3508448479791 | 61.9976238937207 |
|        | 102.085154509866 | 110.715042245563 | 112.60230393988  | 126.620595729562 |
|        | 64.9418945936106 | 137.057972437595 | 179.285390561592 | 102.035798846699 |
| CCRL1  | 39.1878770155069 | 38.0855630164262 | 40.3458948319669 | 39.7988965027289 |
|        | 37.5979144071815 | 42.2114134935898 | 43.6084517252627 | 40.8833572570383 |
|        | 40.547835538778  | 41.0057887014368 | 40.0766543123257 | 45.3170039418236 |
| CCRN4L | 90.3691010312535 | 56.8373628733077 | 64.1777305915695 |                  |
|        | 89.1290937615998 | 85.7842344710572 | 60.4991141099239 | 88.1861828863404 |
|        | 179.47783529     | 79.6198202883864 | 56.685925255591  | 50.8826620053386 |
|        | 63.1443731864055 |                  |                  |                  |

|        |                  |                  |                  |                  |
|--------|------------------|------------------|------------------|------------------|
| CCS    | 88.6663961027926 | 88.9641595603127 | 128.436305192918 | 79.9126192278104 |
|        | 140.264270771578 | 107.232979387172 | 83.2925226467532 | 97.8309399470621 |
|        | 73.3725472767369 | 106.356074933606 | 102.24202987437  | 91.7679182632783 |
| CCT2   | 950.740991182127 | 968.405745860353 | 816.746599467159 | 542.069156178791 |
|        | 714.075528895169 | 767.489657259345 | 1046.42391243532 | 543.975237512604 |
|        | 765.145138238955 | 312.154320305976 | 397.850286751468 | 606.378839153932 |
| CCT3   | 466.454993547103 | 485.310097523194 | 665.122091380755 | 288.869882644391 |
|        | 790.094848284547 | 503.187121806288 | 616.912306849151 | 281.602712448925 |
|        | 592.010988342149 | 310.358667418222 | 364.962649416567 | 308.280127837858 |
| CCT4   | 80.0113001016496 | 61.3838877877366 | 72.2016884438365 | 70.7202372217584 |
|        | 109.017269529278 | 78.3488426553071 | 70.0567634568557 | 83.7019398654324 |
|        | 61.6839343510302 | 76.826527950236  | 75.3075812535743 | 75.6428949408034 |
| CCT5   | 79.8844295847317 | 61.4800543360853 | 56.4779645313958 | 56.2508140932179 |
|        | 64.193536444915  | 60.9822577063534 | 97.5962784863854 | 66.295597720304  |
|        | 73.4853298204744 | 54.3554233228353 | 59.8070012006708 | 68.5174271063894 |
| CCT6A  | 228.439524702578 | 172.285394357607 | 179.994715581707 | 153.711194034581 |
|        | 268.097966292089 | 221.195872577098 | 184.536327776767 | 173.49425401442  |
|        | 224.635749257133 | 123.608921653229 | 144.300051706447 | 207.928770428477 |
| CCT6B  | 55.2182004838121 | 54.6089451252049 | 46.9040704638073 | 52.5307002738469 |
|        | 45.2556760873335 | 53.8461734834857 | 74.9059650336395 | 100.114114765033 |
|        | 66.4251023257203 | 65.813547096222  | 54.5711704180349 | 49.7336769474446 |
| CCT6P1 | 114.230358276599 | 107.610858427836 | 100.756165194192 |                  |
|        | 86.5414905689606 | 109.255307556049 | 122.331946672266 | 101.634888749356 |
|        | 118.651855622915 | 127.78061946174  | 96.2385885003071 | 103.961956810572 |
|        | 112.768270540409 |                  |                  |                  |
| CCT7   | 779.333013700435 | 824.946988188872 | 748.913487947791 | 499.356036793973 |
|        | 1384.80615431656 | 1014.6400720037  | 1136.88710104691 | 822.822769402853 |
|        | 669.419736252343 | 327.631923082696 | 537.213035625492 | 557.094756796515 |
| CCT8   | 1247.50618540769 | 1771.43541011426 | 1570.45778081591 | 939.453799186397 |
|        | 2036.72286752819 | 1024.97546870349 | 1242.75259587926 | 1273.52492984569 |
|        | 1649.78627644882 | 740.423874031773 | 922.047328788961 | 1369.13346566895 |
| CCT8L2 | 44.0328992213727 | 34.8137085420423 | 42.4580504587581 |                  |
|        | 35.8472302065546 | 35.7973685350741 | 39.8455060654531 | 45.1017494688414 |
|        | 48.4670130605028 | 44.1519466943185 | 35.8304004211528 | 39.8184668132023 |
|        | 42.6758568421347 |                  |                  |                  |
| CD109  | 43.7585538437696 | 39.3999056968598 | 39.2707964550441 | 53.8086134112366 |
|        | 38.8456942580061 | 44.7804080899431 | 43.3262148375525 | 42.9301944191913 |
|        | 34.7722083264266 | 42.785429206422  | 46.8954576545929 | 40.5703581862752 |
| CD14   | 1259.2978319548  | 860.265067346622 | 813.242005949542 | 5156.59948231705 |
|        | 584.724083441601 | 2575.86919902296 | 1167.25317435052 | 834.14766574977  |
|        | 177.584394977912 | 242.503720442197 | 277.878824242495 | 460.340300658834 |
| CD151  | 1217.21440297138 | 915.519281747943 | 1564.55598228713 | 671.959673037066 |
|        | 688.612748336336 | 1223.01485352248 | 751.150916058018 | 852.769974690777 |
|        | 1275.78715071615 | 1327.93833415582 | 1516.33074288338 | 1152.55315876935 |
| CD160  | 41.0608773166058 | 45.0115870036541 | 42.5406888281114 | 41.5464765641928 |
|        | 41.7929491793697 | 46.263826584899  | 40.5585676679482 | 41.1575777497576 |
|        | 45.6582729799009 | 46.325232414659  | 50.7903824729818 | 54.8630527326985 |
| CD163  | 193.094756585577 | 124.76401857899  | 195.836475280084 | 825.558929673308 |
|        | 163.995560004001 | 476.421959423835 | 124.551483147457 | 92.804679821289  |
|        | 46.581796165231  | 60.6266092582071 | 56.032814067931  | 286.11425202743  |
| CD164  | 49.7188990489616 | 53.6429962450784 | 50.5089777244781 | 48.856176220627  |
|        | 40.148780650831  | 41.6590564937735 | 39.8695929627783 | 80.2680308979464 |
|        | 42.9020321355927 | 50.6486940895674 | 55.6972661824064 | 53.7442594289333 |

CD164L2 37.0320432433314 40.0527893189096 43.4709415392696  
 34.5425384901279 57.8039717833131 38.8336427948187 41.5817737564592  
 49.7309743973184 47.0804681460898 34.8137085420423 40.3452320167286  
 40.9683275553869  
 CD177 40.4639532172338 39.1982470626863 38.8775560911841 32.7960913111995  
 41.6806984441849 40.9506062495231 45.8980298854198 47.2009420656854  
 41.6616444147804 41.7405682794166 40.6373400186325 42.4607795638552  
 CD180 42.1537476443423 47.9665737016961 43.1931731665131 42.5664883002833  
 36.9702228618069 36.2768299545794 40.6750540874299 35.6825474397235  
 39.6609238036815 46.6598879466655 42.8263096141654 36.8690774823319  
 CD19 51.7607563002005 110.214922820817 58.0218262176065 252.280105035425  
 50.8875036861067 47.0940613507321 46.3057385979341 108.945545005203  
 48.3954967265007 42.3606390470387 45.0589947942306 43.5738557773903  
 CD1A 46.0920218698606 60.2547250212462 37.1643693306382 89.0203733091224  
 55.4919197421746 40.3357777530419 64.232967574797 59.220967994972  
 83.105117076029 38.0078357808393 36.9060997041453 37.1747156131306  
 CD1B 39.7576136507593 50.6229884142872 40.5734458834617 76.6232527679845  
 39.2608760193011 35.7034203372528 46.3057385979341 41.4508241771315  
 37.1820543575123 40.6022003765153 37.8372168909583 36.3454320848591  
 CD1C 55.0078788655089 53.0383634135393 52.2132783757422 105.376705821141  
 53.4109882045447 63.3612993417558 47.2927436772465 55.6904617926772  
 43.2761454096265 45.4614234442527 41.4508241771315 43.9541718254769  
 CD1D 42.0532901689036 48.1829653238565 39.3303857231606 53.8732900241064  
 42.0709558258414 44.7804080899431 41.8315602975157 42.4580504587581  
 42.2248608921879 40.9558083259517 43.0971787292711 45.7562276914441  
 CD1E 48.3583786497948 47.3010040326346 43.1660110696573 61.9976238937207  
 41.1868052124344 40.7063426028871 45.1017494688414 45.2806199505029  
 45.2897806651929 45.2556760873335 43.4424616940528 41.5132248356707  
 CD2 78.1313732870053 194.189674572424 187.439021508049 355.568857981155  
 45.1137938810047 50.2163892855092 77.5813459454823 76.2258667419953  
 44.4395580493118 77.1767494799711 94.0777119695783 46.7182294568603  
 CD200 48.5123041297835 44.5152708955623 46.3411353377615 50.378948785456  
 44.915045386675 64.0020613101392 38.8775560911841 44.6560353921013  
 43.1805016690297 46.0119912782855 50.1649089793069 51.0647893605839  
 CD200R1 45.0283997415478 44.7200265825016 42.5864346233886  
 47.0874209746031 40.0145811166794 49.3654837541353 41.8315602975157  
 45.223075311113 43.3262148375525 40.7063426028871 42.9634662926872  
 46.1592873342534  
 CD200R2 39.7576136507593 34.6306468196142 38.0452862258803  
 46.1673159982664 34.9062568194127 38.5252456306656 41.9393838138203  
 40.047314525032 35.860430241131 41.6373771565199 35.7953070087288  
 42.4607795638552  
 CD207 40.5654775358427 38.9338521051669 44.3344900481112 37.4223289687135  
 39.2608760193011 40.3357777530419 42.7431359850339 42.5435283762933  
 46.0106098064475 40.6022003765153 41.9908237694988 38.4330755397458  
 CD209 71.5484567134601 100.139490974785 111.227016020927 170.901596796384  
 93.4726264307041 561.2769907009 74.0039764902057 71.6202385170491  
 45.2897806651929 70.8749669449099 52.5154971256566 72.7502212566295  
 CD22 41.5421429082231 39.8695929627783 37.4642807402741 47.481302504066  
 34.4570158133896 42.5660695551615 35.3362091871364 36.9355798143571  
 33.2715481910159 41.7405682794166 39.0550139257658 40.0557788909923  
 CD226 37.4554876386402 44.4411734611229 46.7508829977587 70.8835636550472  
 42.0709558258414 43.4681646416585 37.6036146841933 40.7311497914871  
 38.3418933808844 39.1621898366355 42.0750889188255 44.9070250604284

|         |                  |                   |                  |                  |
|---------|------------------|-------------------|------------------|------------------|
| CD24    | 11410.3307451176 | 3786.90274075023  | 1642.75555340648 | 333.566613571224 |
|         | 1490.1549980903  | 389.364650157102  | 4427.89837060471 | 12770.8282719641 |
|         | 1969.8871504719  | 553.328261478032  | 792.880882528835 | 971.856840043688 |
| CD244   | 39.8662795144616 | 44.3529919625344  | 47.7737810047679 | 44.6905691366696 |
|         | 41.5668884168669 | 39.8455060654531  | 37.1643693306382 | 39.3709357615493 |
|         | 38.4344387289956 | 46.1390887492649  | 44.7926323492519 | 43.6753843488695 |
| CD247   | 95.7194132679937 | 213.204385896543  | 218.446312290024 | 262.735075993242 |
|         | 75.4272782742534 | 69.9819944829311  | 132.903804194161 | 116.275899706695 |
|         | 59.3580517977711 | 95.3507664364654  | 107.682738819549 | 65.4435809676217 |
| CD248   | 606.276674926567 | 274.648263378054  | 233.468474830926 | 360.342857415756 |
|         | 348.165210494253 | 987.427672417105  | 56.7780520416533 | 147.704325041249 |
|         | 64.643220133046  | 647.044821320392  | 395.875593488613 | 584.724083441601 |
| CD27    | 43.4626049853157 | 67.5417980425932  | 52.3432130135266 | 120.068630086702 |
|         | 38.3561682218911 | 41.8613406887824  | 43.6753843488695 | 43.9366081640576 |
|         | 35.5220586859301 | 52.0999467564713  | 43.3085358214154 | 42.9887069977696 |
| CD274   | 41.5421429082231 | 41.7337506166619  | 42.0621425894624 | 77.3864518736634 |
|         | 44.0451487108213 | 48.0350549043063  | 47.8947595316832 | 57.6684494624163 |
|         | 44.619512785899  | 42.9866214102525  | 46.1673159982664 | 47.6040671292013 |
| CD276   | 209.705575423447 | 112.542326463419  | 89.1632548302738 | 100.234661597218 |
|         | 126.274897979594 | 86.1924491308234  | 161.326580647514 | 169.889618506937 |
|         | 128.860357469791 | 87.5967418612698  | 81.2673471767743 | 78.5697118992327 |
| CD28    | 44.436995101921  | 47.4076235350059  | 47.9035532886869 | 59.2778887402357 |
|         | 46.4343327861696 | 48.0350549043063  | 43.0930293831497 | 47.2864663693787 |
|         | 38.3418933808844 | 39.8873706855774  | 44.6286581923295 | 47.1060577218993 |
| CD2AP   | 77.1900613562529 | 109.386655134289  | 95.0738959950301 | 48.309866878365  |
|         | 62.1836961153924 | 52.4351670989268  | 83.6935756500468 | 54.9919060580109 |
|         | 122.301290485889 | 58.8022152133979  | 65.2295773603116 | 90.8140983242733 |
| CD2BP2  | 892.754288149486 | 609.243908604949  | 1111.13061382818 |                  |
|         | 736.405815842011 | 1037.51323185348  | 668.584452504579 | 497.290172759099 |
|         | 670.271164195182 | 368.162822151919  | 646.323419285676 | 675.832363405287 |
|         | 488.649780652311 |                   |                  |                  |
| CD300A  | 136.736085245679 | 83.0574731969818  | 72.0243286940589 |                  |
|         | 701.168333137671 | 63.955655956484   | 95.8075612515186 | 79.909124697198  |
|         | 65.1637149462661 | 48.9931786790166  | 52.5522545249206 | 49.0361180089431 |
|         | 61.8529316708431 |                   |                  |                  |
| CD300C  | 44.7044140979108 | 47.3536182445315  | 41.9666541498638 |                  |
|         | 111.071209057746 | 46.5557478175976  | 50.6360662655392 | 44.2166118829877 |
|         | 50.0526763693329 | 41.56354991110307 | 46.1390887492649 | 41.3553369544097 |
|         | 42.1537476443423 |                   |                  |                  |
| CD300E  | 38.7537364570873 | 40.3384318592985  | 39.6451483836089 |                  |
|         | 51.5913529948887 | 42.7107928951766  | 49.1013967533186 | 38.5066108855005 |
|         | 38.3684202018524 | 42.9020321355927  | 39.9948390976317 | 39.4410515050885 |
|         | 41.7575097298927 |                   |                  |                  |
| CD300LB | 43.5710871617107 | 38.9338521051669  | 37.9482157381008 |                  |
|         | 55.2214187655851 | 38.8456942580061  | 46.3715909653832 | 51.1541843174981 |
|         | 43.3262148375525 | 39.3750969348308  | 42.3606390470387 | 37.9230440150891 |
|         | 47.5025821041537 |                   |                  |                  |
| CD300LF | 58.8224410806741 | 50.7487159427973  | 55.3122077514658 |                  |
|         | 276.550265506988 | 49.1928206164702  | 45.6129956328415 | 44.3440839686558 |
|         | 46.695848687694  | 40.4997186069494  | 39.8873706855774 | 40.9157352260901 |
|         | 46.917149434588  |                   |                  |                  |
| CD300LG | 40.7022020432945 | 46.5952288260503  | 50.5089777244781 |                  |
|         | 47.5733603903505 | 43.9994592139885  | 51.1621379498014 | 42.9803717121865 |

|        |                  |                  |                  |                  |
|--------|------------------|------------------|------------------|------------------|
|        | 48.0582855095143 | 46.0633179231318 | 51.0492389286271 | 46.5308571957384 |
|        | 45.1735152121056 |                  |                  |                  |
| CD302  | 56.3884556031093 | 71.6537776654915 | 65.2670315837785 | 110.25582862843  |
|        | 87.9963662401769 | 219.527698657901 | 66.4258159334241 | 66.9340967279385 |
|        | 50.5368663784059 | 69.5853093594169 | 97.4515987591398 | 99.8277095030346 |
| CD320  | 157.189139558365 | 129.081183929988 | 107.792406701643 | 121.281573820819 |
|        | 468.573956652904 | 174.117816184497 | 53.4921736109774 | 136.913434348036 |
|        | 144.37233706688  | 105.29989739819  | 120.418406532204 | 116.793627324217 |
| CD33   | 50.0466349801009 | 49.83247261979   | 49.5424425850549 | 143.624756920887 |
|        | 48.9627346956003 | 118.57174795047  | 44.7255207589606 | 41.5464765641928 |
|        | 43.3744503319109 | 46.6598879466655 | 46.4753015651202 | 58.5087296620514 |
| CD34   | 127.986477405999 | 120.465621774337 | 179.040571908629 | 118.614027673431 |
|        | 83.8419777255838 | 581.093069802913 | 51.688837858865  | 94.8260360398356 |
|        | 52.0999467564713 | 400.093769705765 | 281.452208033175 | 232.440458525975 |
| CD36   | 47.4767851750188 | 59.9682734755814 | 52.683711208052  | 117.8523906126   |
|        | 48.9980022280763 | 203.651890041185 | 45.223075311113  | 49.7748385529588 |
|        | 59.3709786862962 | 58.0218262176065 | 49.8393069675192 | 61.2343203799193 |
| CD37   | 78.7045070574092 | 111.689615107055 | 85.0946882743418 | 572.19538884395  |
|        | 44.9936360641969 | 112.519759295176 | 105.45765455249  | 81.9218437790485 |
|        | 44.8636979668258 | 51.4454142248566 | 54.7061116419212 | 51.2776048338    |
| CD38   | 41.7397731376692 | 57.4538469832241 | 53.6837370963602 | 152.21278457652  |
|        | 48.3814421939888 | 39.3841861812262 | 39.2533668167483 | 51.555506218204  |
|        | 33.5578650644246 | 39.8873706855774 | 38.3684202018524 | 37.4554876386402 |
| CD3D   | 72.2797007105795 | 98.403191200835  | 100.139490974785 | 204.659954879641 |
|        | 48.7906379070015 | 46.2027193115397 | 53.593974682612  | 76.4116336410131 |
|        | 44.5766390180978 | 67.8774399765179 | 85.7390214986603 | 55.2776978524578 |
| CD3E   | 48.1952521496489 | 61.7572675712557 | 67.235655687817  | 87.4850071876743 |
|        | 47.0954207417646 | 42.8598805316863 | 48.1747307200218 | 57.6684494624163 |
|        | 40.2274522635576 | 57.3562426592112 | 69.6097529955737 | 55.3563533836982 |
| CD3EAP | 46.441301934328  | 48.4497719907777 | 48.8941062980393 |                  |
|        | 43.074472921841  | 71.0593419018503 | 45.0882356578404 | 42.357910063876  |
|        | 48.6441988290952 | 52.8502823653368 | 53.1993028936883 | 43.9450023643394 |
|        | 49.6629259325705 |                  |                  |                  |
| CD3G   | 48.7646976789783 | 52.3896785600751 | 53.0104469636221 | 69.6511571901941 |
|        | 38.0598374201407 | 44.4619248757502 | 48.6395795163502 | 47.4740726032707 |
|        | 39.7537274655115 | 42.8936990772838 | 45.7328341667151 | 47.6938628797168 |
| CD4    | 67.1387898740161 | 58.9910892923962 | 67.9850517608624 | 168.869258524932 |
|        | 50.5110359971301 | 70.2553917409773 | 51.1541843174981 | 69.7729022157455 |
|        | 46.1101825640108 | 147.945429978177 | 92.7254735358203 | 92.3388129097482 |
| CD40   | 59.6651708873036 | 58.0218262176065 | 62.8635815439291 | 125.052841200703 |
|        | 70.2565873027242 | 67.9922604709859 | 46.0228732507872 | 57.3837827230023 |
|        | 80.5437011468815 | 66.6788758487969 | 78.0020909283414 | 70.2680820278385 |
| CD40LG | 39.5676051939342 | 44.5884811528117 | 51.9214790114499 |                  |
|        | 46.614092935749  | 44.6834648302383 | 41.6590564937735 | 40.2154497375715 |
|        | 33.4534810696886 | 37.6383530120621 | 45.2556760873335 | 41.2598458726002 |
|        | 44.6484005362281 |                  |                  |                  |
| CD44   | 447.248719481853 | 272.022473793857 | 471.297503316471 | 1716.82239359769 |
|        | 247.966757890598 | 735.460645553438 | 224.914980996667 | 467.884559162462 |
|        | 314.091389958069 | 691.132727131746 | 591.192020333181 | 673.522667186915 |
| CD46   | 346.116601612353 | 617.808073077341 | 933.968759959712 | 272.981148492864 |
|        | 413.31638457585  | 255.284866561352 | 300.762511215441 | 370.330147221688 |
|        | 552.860979481958 | 382.872356030213 | 439.955651727755 | 699.488969175268 |

|       |                  |                  |                  |                  |
|-------|------------------|------------------|------------------|------------------|
| CD47  | 102.952512767439 | 136.67168846573  | 116.839274984089 | 170.560304063093 |
|       | 101.987604729928 | 175.673196925527 | 85.2805684630976 | 87.3634135323569 |
|       | 138.292681458047 | 140.698550434486 | 152.200107222761 | 139.328628553223 |
| CD48  | 58.651329686676  | 56.0477607422828 | 64.9072331703985 | 417.738831997557 |
|       | 43.9450023643394 | 54.0382756991549 | 61.3620062177524 | 53.4109882045447 |
|       | 39.4762546236449 | 61.8529316708431 | 59.0537479001842 | 53.2046867327331 |
| CD5   | 45.4799270968969 | 57.2871072823547 | 55.3122077514658 | 70.506090074243  |
|       | 43.4544762830742 | 43.5752393599169 | 52.4111687156893 | 47.7889447429963 |
|       | 41.2870505273664 | 40.6022003765153 | 44.7114813656401 | 38.9496515344837 |
| CD52  | 162.864661742501 | 212.688298502868 | 201.330854646158 | 1372.51401036753 |
|       | 71.0593419018503 | 113.218291314173 | 117.556281726503 | 237.809876921353 |
|       | 64.2174369755376 | 142.515628954457 | 129.592927998658 | 113.130838519437 |
| CD53  | 62.4317959077388 | 58.7460488758053 | 58.637422084759  | 437.84407370064  |
|       | 45.310660704531  | 67.6817814091697 | 57.51482768194   | 53.6782125131958 |
|       | 40.1738310955128 | 48.3077814647455 | 45.6706505553383 | 50.6141827957642 |
| CD55  | 264.116434279258 | 305.119894105297 | 280.920208331594 | 686.154904023493 |
|       | 180.255771684507 | 282.035361446993 | 248.355842321304 | 444.618035487523 |
|       | 143.251956814524 | 279.782392390288 | 180.994353525666 | 305.119894105297 |
| CD58  | 113.632855481549 | 194.012210675469 | 198.788202490193 | 356.826869112433 |
|       | 97.0055689383756 | 132.223745961048 | 122.514153407264 | 84.9280683258012 |
|       | 206.190699642477 | 80.1419822448876 | 87.6098790075242 | 178.858202962948 |
| CD59  | 76.1417635449123 | 66.7585874672879 | 112.811643697986 | 112.506613718654 |
|       | 84.1639779987105 | 89.3168921945222 | 53.7423898357583 | 74.7794253940974 |
|       | 58.129051241441  | 75.2053836356882 | 84.8808332740321 | 125.221639689345 |
| CD5L  | 36.2496364442264 | 40.4359177791566 | 36.6522278218553 | 37.1894304543751 |
|       | 37.7576900881741 | 34.7983399096627 | 37.3799542961839 | 38.079222289614  |
|       | 36.0741672064298 | 43.2988017098387 | 37.2892641289258 | 40.6614700944853 |
| CD6   | 61.9504984796308 | 124.56803502087  | 123.597489107285 | 233.539376791695 |
|       | 75.1674447943072 | 53.7442594289333 | 68.0157730844432 | 76.6868184563568 |
|       | 53.7442594289333 | 66.5422130374814 | 81.3454589502043 | 54.0374522273907 |
| CD63  | 194.924141888391 | 205.510539955583 | 219.616289279562 | 242.282363793567 |
|       | 120.136330103936 | 271.857378677296 | 170.87055409699  | 193.853749625939 |
|       | 142.647217549267 | 201.530434441408 | 273.108672916862 | 201.530434441408 |
| CD68  | 802.036670929858 | 255.365088438518 | 478.682734715193 | 1945.33618761041 |
|       | 200.986069552443 | 473.223156200183 | 270.487135967976 | 585.421238639853 |
|       | 137.239944506217 | 328.548716133094 | 249.855746700674 | 475.008345432596 |
| CD69  | 63.0505463098231 | 116.17375251898  | 599.670771796585 | 1107.96086673001 |
|       | 44.2607789091176 | 460.865101118125 | 136.293724800658 | 78.5174639327946 |
|       | 557.094756796515 | 62.0500352705887 | 61.0506827768127 | 49.7336769474446 |
| CD7   | 69.9431447778061 | 79.7691160370015 | 81.7434024567356 | 197.540681021755 |
|       | 51.2525124735102 | 53.9517841438975 | 61.8571521441451 | 79.9597944271831 |
|       | 51.0062122023297 | 52.3304586399695 | 95.2490714726663 | 50.4847465816184 |
| CD70  | 260.279110870904 | 49.1283590719461 | 43.0971787292711 | 52.1201052574162 |
|       | 46.4343327861696 | 45.4882438975269 | 50.0088611244948 | 43.0390857698452 |
|       | 40.7847110517594 | 47.4767851750188 | 43.5710871617107 | 41.6550823405646 |
| CD72  | 61.2130609867477 | 51.3084273211359 | 56.1434024065079 | 132.205423909251 |
|       | 48.2748123114598 | 43.6670755115848 | 60.9648845690177 | 55.5578334877425 |
|       | 39.6609238036815 | 45.4614234442527 | 40.547835538778  | 44.7401523707775 |
| CD74  | 1226.43929953115 | 1073.84987604662 | 960.526372655577 | 3263.05269150231 |
|       | 427.818758455214 | 771.554891868456 | 706.914069768466 | 1118.62223628039 |
|       | 1485.68317899614 | 500.549865625701 | 952.16345035163  | 381.198152331624 |
| CD79A | 43.9477262001082 | 88.8568707880669 | 73.7060605978536 | 379.031536537372 |
|       | 42.9627566278041 | 41.8890826572422 | 43.607701594929  | 60.9009676344258 |
|       | 42.3060097375421 | 43.2988017098387 | 39.5748670524951 | 42.1915582886043 |

|        |                  |                  |                  |                  |
|--------|------------------|------------------|------------------|------------------|
| CD79B  | 48.6621527194963 | 78.0730371064675 | 65.6620676514157 | 212.353676518748 |
|        | 47.965492554043  | 65.0391287166255 | 51.5119005564951 | 67.4775348162369 |
|        | 46.2657906047993 | 59.6565330440648 | 60.5948704279864 | 55.1037284831588 |
| CD80   | 40.6559419616644 | 44.7829632472754 | 42.2577689927563 | 61.3747706295648 |
|        | 39.6535880152834 | 48.1591264215184 | 45.1017494688414 | 41.7419877611072 |
|        | 34.8552366193358 | 42.9866214102525 | 39.7342718293432 | 37.5556299264699 |
| CD81   | 4632.08655821299 | 6673.00322263275 | 6606.35767508139 | 6309.53691418065 |
|        | 5246.60459228386 | 8259.38594893529 | 4820.70258471362 | 3263.05269150231 |
|        | 8050.256095383   | 8703.02873382565 | 9326.9018948838  | 7393.77508374057 |
| CD82   | 92.2447473381285 | 91.5464279432216 | 160.100408020768 | 183.613579501306 |
|        | 89.4111455826308 | 100.510815049535 | 94.4618437533343 | 83.3322777515023 |
|        | 112.743602566917 | 73.9192243586276 | 99.3142021810133 | 88.8330881965986 |
| CD83   | 127.072685504735 | 146.196470375622 | 84.3755392205436 | 831.578043520215 |
|        | 237.532800487032 | 161.268186656743 | 158.998384690038 | 303.139550962377 |
|        | 66.8077748120381 | 69.0530953932111 | 61.5392012551041 | 65.8455652907556 |
| CD84   | 48.5835484742456 | 53.3175733763272 | 57.50915811428   | 138.581471125405 |
|        | 43.9450023643394 | 61.3309323244567 | 48.1069139823064 | 49.3217779272599 |
|        | 45.4154248354367 | 44.4294261786154 | 46.0905079010237 | 46.5905131500956 |
| CD86   | 72.4325984501758 | 67.686778662624  | 88.1068080491008 | 388.336994961328 |
|        | 56.359578588344  | 67.6817814091697 | 71.5836731059913 | 73.5459854447472 |
|        | 47.7086093893038 | 44.1956990708089 | 45.9104478407175 | 48.1627097465883 |
| CD8A   | 57.4376528157926 | 78.3488426553071 | 101.086264355915 | 137.831070407907 |
|        | 44.2607789091176 | 44.5180992653789 | 49.6872467499977 | 75.9136854087044 |
|        | 42.8530333223554 | 74.9491421278749 | 151.848243044839 | 61.6311118308635 |
| CD8B   | 39.7349536408822 | 39.2542963855807 | 39.9101908547397 | 42.2496337895968 |
|        | 39.9697332660833 | 39.780640540889  | 44.0687697278114 | 40.9861485852278 |
|        | 45.0583552831013 | 40.5620233728036 | 43.2551508830106 | 39.2839132447749 |
| CD9    | 160.015674121695 | 126.171040948196 | 219.036267470696 | 168.11088055793  |
|        | 86.033725825968  | 221.383645621978 | 196.200780398883 | 187.923050034941 |
|        | 478.799250340246 | 141.567299023381 | 241.677456498713 | 310.188313944313 |
| CD93   | 352.47015903013  | 519.775555680262 | 836.472724085903 | 1886.05449875658 |
|        | 263.636675573982 | 621.489785652602 | 125.30588698166  | 314.856937113103 |
|        | 72.1591028956359 | 132.959812230068 | 212.117653688186 | 242.546821017091 |
| CD96   | 54.1745577382276 | 140.226992517573 | 164.205608279417 | 143.973063517706 |
|        | 89.9615463738575 | 50.8056327587768 | 174.007271403635 | 184.269633116351 |
|        | 94.5716601751149 | 130.946383858668 | 132.242070552057 | 87.8967913380047 |
| CD97   | 152.132756414024 | 194.644164648125 | 180.029671376384 | 968.405745860353 |
|        | 297.739286969257 | 376.931257615162 | 208.379981648601 | 258.120500906788 |
|        | 167.319747725488 | 146.789051265805 | 190.053043382767 | 201.875082892488 |
| CD99   | 457.681756480301 | 112.146987452306 | 109.374838860558 | 226.456072107079 |
|        | 81.2359429678503 | 439.862941165528 | 250.621261212308 | 320.74875942191  |
|        | 132.985150338484 | 218.675464231277 | 166.910579215196 | 186.229678647062 |
| CD99L2 | 287.689260887067 | 155.026564617762 | 156.615248744544 |                  |
|        | 287.363928615517 | 144.484560429882 | 532.981045084589 | 115.98265270452  |
|        | 200.144817111902 | 107.961407367823 | 388.336994961328 | 416.844848063269 |
|        | 290.81245174957  |                  |                  |                  |
| CDA    | 58.1868359012515 | 62.2150049214174 | 78.9701459806641 | 136.155022329495 |
|        | 48.2748123114598 | 61.7091923488929 | 126.079949368634 | 72.692416146584  |
|        | 55.2114969675545 | 62.6984594468418 | 55.2374601141719 | 58.2879293130296 |
| CDADC1 | 41.9407041937973 | 45.4882438975269 | 52.4485219671976 |                  |
|        | 55.4180794172794 | 48.1473938886239 | 47.2009420656854 | 55.0897019602305 |
|        | 48.0582855095143 | 40.4997186069494 | 56.3441077510744 | 50.0303076717704 |
|        | 48.27609330316   |                  |                  |                  |

CDAN1 1067.08316477623 529.977491403949 652.480459437977 942.247437385029  
551.1195044975 393.648308810931 781.223434214089 1607.73526966988  
459.546279672649 1416.47763911039 1234.59589464045 938.802606388076  
CDC123 354.015808474189 469.893430869091 438.22469176123  
322.109212713082 612.014486689487 352.246108891022 827.365231733511  
307.329227013816 585.771656887036 221.163225922749 299.524171071613  
267.232315058148  
CDC14A 44.9126614290929 45.7023929486654 47.7112511352621  
48.267960165858 43.9450023643394 45.6706505553383 44.0137388752186  
45.9104478407175 50.379587451669 47.8636003588181 49.2751108739288  
49.3533917376456  
CDC14B 66.6547247910487 117.556281726503 91.6713614282714  
65.8926843080114 83.9387217886961 111.532958750074 92.9894133685392  
62.6735174039054 100.294952875307 133.074560812703 146.249568587351  
162.447872391923  
CDC14C 47.2862299990938 43.7644428186265 48.1997158668729  
39.066284740632 40.9950639693255 43.9724628401189 41.1507980856436  
43.0390857698452 45.6582729799009 40.2112371512838 39.9899430628542  
43.0930293831497  
CDC16 484.482971152057 421.971171686029 497.290172759099 341.666968456707  
614.603743904512 459.546279672649 351.039814818516 346.438778257772  
362.788520130059 634.226367147025 577.993850127555 555.044139654886  
CDC2 138.50445813694 153.037055310357 92.0880591999243 48.665578118898  
122.988056802699 52.0583273941813 82.8485522398913 77.8946473414547  
296.842555066902 41.0057887014368 44.0409178714232 45.7562276914441  
CDC20 471.297503316471 562.258108316474 376.453560620912 134.394743648475  
1149.90692951795 124.490684428024 1174.92419086759 974.296760034984  
826.490051619826 55.6865353018811 54.0374522273907 64.3571664944642  
CDC20B 50.315768338317 48.4980626712175 53.9612654850046  
49.3654837541353 51.7983110178095 49.9699131196797 45.223075311113  
46.7980335276155 46.2027193115397 49.0841460667818 47.8284278211109  
46.8129509799753  
CDC23 210.667709831149 159.463273263774 197.103673938152 163.718576695806  
224.373975368936 157.856158440506 163.809567262808 240.476103976894  
268.683528469759 302.79352975792 235.764999941441 243.341575080264  
CDC25A 61.7551416187554 68.5251167137806 49.0655215909632  
43.0016969050339 93.6591201235745 54.0382756991549 91.8733417805775  
75.2950416358859 80.7409247380392 43.6670755115848 43.0016969050339  
49.5197902747103  
CDC25B 248.527031538874 135.226924329183 135.19133529995  
276.267583952979 174.058845828966 143.478533731355 302.978457293429  
185.474249522831 161.573327074375 149.59360999995 115.229070906222  
96.9476136220382  
CDC25C 63.1291723738553 64.232967574797 59.2012779686869  
44.7255207589606 70.1597323687098 46.3150221024046 79.3315961732103  
90.4160198134865 73.4687357112674 41.9666541498638 39.4736654224088  
42.9292230806949  
CDC26 369.451882513347 278.850071205987 243.27954361539 477.263677441074  
318.302018651677 493.705301673753 433.89783033465 329.120125961774  
389.364650157102 452.797096652556 407.564154455615 594.184150517102  
CDC27 44.0328992213727 39.8695929627783 39.6451483836089 44.9370339275041  
41.0885562160946 47.0027453663546 40.6750540874299 49.5185112777773  
37.8319142847141 45.0155543555707 44.6286581923295 40.9683275553869



CDC2L1 63.6767189846426 61.8701572127817 74.7625228047952  
82.0292880742189 82.5344501505114 108.847044476692 82.3364971911816  
62.4219686957673 71.5836731059913 61.0311116373365 72.768998788927  
72.2720428359203  
CDC2L2 85.6964911093755 52.9603588177082 65.8455652907556  
68.3157692917711 61.3851695159988 63.1604223919703 91.6526163804547  
82.966263655525 68.6847047963888 60.0793579902362 74.9006142438341  
64.2769859135548  
CDC2L5 99.1565755621214 117.934830767297 98.9113424606303  
120.3698209682 110.146992754585 91.3418781023824 100.057155418659  
117.948047796034 144.578232267116 142.291320727209 122.642481894309  
107.337113678019  
CDC2L6 662.848386826617 188.734299563005 243.15571937138  
324.877187846959 103.199200862158 203.913062066149 304.258586051126  
1014.6400720037 224.030034866938 341.078728185917 366.129480083279  
255.087214364926  
CDC34 137.156113501125 183.165559564289 157.133627517432 93.6212502203405  
315.696895080135 214.537530518962 153.901083585889 151.686513723244  
197.923403667051 107.840833498938 157.020685801527 119.947688643528  
CDC37 2921.68921750799 4148.07163380544 4665.45637589484 2294.75523373329  
5047.91205452316 2581.34849558524 3618.78958408675 3282.4852236415  
3143.97163345458 2650.09507972593 3124.84336032646 2232.61002288121  
CDC37L1 42.9104454767916 37.4540772310118 42.157627240486  
45.4634652319753 45.1137938810047 44.3648993568405 50.0088611244948  
40.4359177791566 42.2577689927563 44.1379638573455 41.1638563416981  
44.4475838947656  
CDC40 215.15351875081 288.508774004052 287.247399926139 257.325282051981  
122.904323796484 277.665554240228 172.433936159136 514.853892585612  
210.059998353905 219.616289279562 240.731386634957 278.697914107208  
CDC42 64.7318794662958 76.4796910268368 61.1745030100746 82.1809804715696  
58.174555206394 60.1591647295056 69.2322821603564 84.0899854321388  
78.1761025629963 68.4409478568282 64.0541263553251 83.105117076029  
CDC42BPA 52.6364613846829 57.5197017161209 59.1040441894478  
52.9156540211793 51.540723788287 74.0995052892511 55.2998422481855  
55.0698932795613 51.0062122023297 69.8941497035747 62.7743500747415  
78.5468300294626  
CDC42BPB 191.09175268141 107.951009163316 154.633672616367  
104.335120306753 107.54932544455 167.626012561905 102.913039837094  
181.298709635609 148.333778341005 289.112248695929 218.613795121752  
143.749408328062  
CDC42BPG 40.8681871019812 48.7084357480922 53.4088637045445  
43.6726153508978 39.859345745831 38.4330755397458 42.1607322031054  
42.5435283762933 43.1805016690297 39.1621898366355 39.5399188536544  
42.9887069977696  
CDC42EP1 58.9201382292404 58.174555206394 49.5424425850549  
47.7362556248858 55.7657817295432 48.8744644207821 54.2445399731644  
48.7814131120945 74.1282220615085 40.0557788909923 44.6286581923295  
48.1627097465883  
CDC42EP2 70.6065558064758 62.0908175930716 67.1299518044849  
144.94134446105 110.214922820817 154.355197155161 142.614006543733  
93.879589378061 67.591570323687 130.812376632261 114.093655272795  
120.286733441947  
CDC42EP3 51.9545473262296 47.3536182445315 55.9459886217809  
70.2541961995753 45.5809132232681 77.2834482217973 45.3597029614942

35.6825474397235 39.9444191873552 42.1622837416589 48.1352470945488  
53.655233033193  
CDC42EP4 592.989860385203 882.105892529265 1485.68317899614  
420.401914084346 1269.36837611919 1483.40077183826 928.230419226078  
784.268074988084 1780.14552702126 1137.99307039386 1455.64106630257  
976.566026758227  
CDC42EP5 337.084861453686 1083.50383916482 963.224016480187  
202.751918610777 386.271174243357 349.371668774717 223.749512763927  
230.117814622646 983.972164685474 2126.41018877615 2138.23653387331  
1217.21440297138  
CDC42SE1 79.7238173467616 95.913238814854 96.6294773538052  
71.7167037224069 79.5175547131776 53.2874286456249 65.3694267397114  
140.41738844565 92.0711167984454 58.5831897269778 65.4643755537228  
100.326655761429  
CDC42SE2 108.57858133896 121.236881661832 131.045615546105  
211.685526927495 81.7765447802116 97.8702400145827 77.0774476767901  
119.362992523422 143.122201568705 134.646159826262 128.559660070271  
181.064239330482  
CDC45L 161.38599012777 208.878921620914 113.18951586976  
76.9373289454707 248.058310353348 58.3387916574158 314.281125546552  
248.058310353348 246.869486382264 45.2556760873335 41.7272875295469  
59.8760452220989  
CDC5L 136.530734456168 94.8766888888828 92.6672238953636 112.957927208627  
118.638732417836 114.526825145076 94.8766888888828 84.9075858560758  
114.304598397252 80.0651801266824 86.4195039096886 142.812241748319  
CDC6 47.0940613507321 46.4385386401326 37.3687900733549 53.3967242431461  
47.4548471240051 45.0882356578404 50.0088611244948 43.6434576713809  
47.5564423692142 43.844855336215 43.6629145624937 40.7704587752083  
CDC7 60.1705241170421 48.8584917918986 51.9885249508283 37.651298468202  
64.3571664944642 40.650742261428 66.1940959364976 63.4570909617664  
64.9725753882126 37.7315666632629 39.2542963855807 45.0035308952466  
CDC73 49.6241203903354 40.5400384479766 44.0451487108213 53.593974682612  
45.2556760873335 40.3357777530419 37.3799542961839 53.2046867327331  
41.7627910693483 39.8873706855774 43.6629145624937 48.27609330316  
CDCA1 34.1336988442837 41.9894412416874 45.2313723727673 45.4634652319753  
51.940083408061 41.2567470068038 41.8315602975157 37.4484310268909  
37.9273653326866 35.93950183586 38.8507804383261 42.57175366709  
CDCA2 74.0913177754682 59.4253780950488 59.1040441894478 44.4367387274922  
66.4047895961325 48.3686935595826 80.7563265626648 67.8061298261394  
67.3230935444252 40.4136535208406 47.6125796208753 44.2527566343661  
CDCA3 81.9258201510475 71.9162507601624 73.967017874248 44.4367387274922  
114.972374827795 50.5148383400703 161.205086002542 86.5926014007562  
116.461730749198 40.6022003765153 44.3763859390287 43.9541718254769  
CDCA4 101.627551729492 79.5707751325986 82.6983700200815 95.096268847843  
132.555169949054 104.914715637173 117.502489192855 86.2413316441255  
135.138667957956 98.1433318215702 91.2202310968307 94.233414682323  
CDCA5 338.475097952023 303.281551940647 201.782740241526 124.976348531594  
1020.75813028358 164.287737381703 901.793120584383 469.78210773245  
450.759762047652 49.9493230064613 49.532546810992 64.863894209343  
CDCA7 141.79653024085 114.526825145076 69.6554376880691 59.6153684374766  
292.735673136799 78.4815128101967 177.602690452814 102.294142438313  
172.698530496379 58.115198353247 51.0013344286851 86.6854406823303  
CDCA7L 54.0990839134272 50.8114699212931 48.9944486068347  
47.481302504066 85.0017995689256 68.5457752893587 82.2650787041549

|        |                  |                  |                  |                  |
|--------|------------------|------------------|------------------|------------------|
|        | 46.9986083378817 | 36.2733735494625 | 50.5252048155459 | 50.2203578628217 |
|        | 52.6922486991742 |                  |                  |                  |
| CDCA8  | 141.087571926258 | 113.624887028422 | 108.928854330744 | 63.6334154351075 |
|        | 228.185436206823 | 58.6439719071099 | 195.108184885541 | 287.981727851442 |
|        | 170.150808455621 | 51.8412522234186 | 51.0492389286271 | 54.3587260982091 |
| CDCP1  | 92.0136417064806 | 72.2377222744463 | 69.7855392178808 | 87.7460859694899 |
|        | 102.717305041352 | 48.3119523820103 | 89.7242042805798 | 97.1884078242617 |
|        | 113.612874206329 | 71.2409890549638 | 68.6666478088834 | 87.1651984640976 |
| CDCP2  | 36.5393857306744 | 39.0102066700839 | 40.8420925848403 | 41.3027031037343 |
|        | 40.8873907150245 | 46.263826584899  | 41.4742337714895 | 40.4359177791566 |
|        | 39.3750969348308 | 40.8049408996274 | 42.0750889188255 | 40.9683275553869 |
| CDGAP  | 43.844855336215  | 40.716553247236  | 41.6977706798234 | 76.2591822114739 |
|        | 51.0107745412152 | 45.9266745571724 | 38.941855825269  | 43.7396619462033 |
|        | 40.9901805728485 | 48.1392888470269 | 45.1432412071268 | 42.2577689927563 |
| CDH1   | 2146.1548633579  | 2621.65272077828 | 3070.83113612925 | 133.720493104769 |
|        | 1104.45371981807 | 185.563590013028 | 1226.43929953115 | 1900.96666834569 |
|        | 2474.22199172028 | 1024.97546870349 | 1459.69929955338 | 968.405745860353 |
| CDH10  | 31.5599106749655 | 47.1332119496722 | 47.7737810047679 | 41.7614975630362 |
|        | 43.4544762830742 | 37.0180934800573 | 39.1539892144371 | 42.6450179841129 |
|        | 40.3316153483289 | 34.2638875325204 | 42.7275315121163 | 38.1421709520616 |
| CDH11  | 556.417356025042 | 193.730784033221 | 88.4897895318663 | 286.996922972683 |
|        | 188.670053901101 | 174.392758289374 | 45.8980298854198 | 237.632703283663 |
|        | 65.0810479794187 | 151.912182086236 | 179.629622763381 | 146.117756310709 |
| CDH12  | 35.7012997405508 | 43.0971787292711 | 56.8595344107711 | 38.4208429103799 |
|        | 40.0599807618105 | 39.2248354955045 | 37.6036146841933 | 40.831207953647  |
|        | 40.137818555383  | 68.4137459386155 | 48.2910530887214 | 48.0350549043063 |
| CDH12P | 41.0608773166058 | 38.5252456306656 | 38.6727842796202 |                  |
|        | 44.0451487108213 | 39.4693871570028 | 43.5752393599169 | 41.5817737564592 |
|        | 42.5435283762933 | 42.6366765186182 | 40.2112371512838 | 39.7342718293432 |
|        | 39.3575468494941 |                  |                  |                  |
| CDH13  | 67.8774399765179 | 58.9910892923962 | 64.1777305915695 | 69.5544840164738 |
|        | 52.6922486991742 | 50.9724155054821 | 40.7910160811527 | 49.6203214143464 |
|        | 45.0017158586743 | 65.3377940117969 | 50.0808824383821 | 59.2035499250243 |
| CDH15  | 52.310270746917  | 43.7644428186265 | 38.4043916290561 | 40.5484717678957 |
|        | 44.8897737954573 | 36.3845892764084 | 40.6750540874299 | 41.1575777497576 |
|        | 42.8036731479932 | 43.0919221375514 | 36.2435874904689 | 40.7704587752083 |
| CDH16  | 44.5282181324797 | 47.9128504683618 | 41.3366779545815 | 39.2780515621926 |
|        | 38.5512429290626 | 43.4681646416585 | 41.8315602975157 | 46.1673159982664 |
|        | 45.6582729799009 | 47.611018474151  | 44.7114813656401 | 42.357910063876  |
| CDH17  | 43.6706764143908 | 41.0678614026819 | 39.1799070031819 | 39.5050383901884 |
|        | 43.9450023643394 | 43.4681646416585 | 42.7431359850339 | 42.157627240486  |
|        | 43.2761454096265 | 42.9866214102525 | 44.8872784170036 | 42.6758568421347 |
| CDH18  | 34.9138625012006 | 38.1312950900467 | 38.1421709520616 | 33.1137701681495 |
|        | 36.7356360093603 | 37.7000400506818 | 37.4772922422734 | 35.9023742468744 |
|        | 35.3227485563945 | 37.1275334308172 | 36.2435874904689 | 30.4639019828888 |
| CDH19  | 42.6575535390785 | 37.0390589468421 | 39.5893773029164 | 40.3180310664156 |
|        | 39.1087466732192 | 60.2083550387718 | 40.4941260038116 | 47.7889447429963 |
|        | 46.8873421271259 | 40.5571841955033 | 48.7814131120945 | 41.2437378488025 |
| CDH2   | 148.758736522703 | 59.6359245937831 | 64.9072331703985 | 102.00080367858  |
|        | 69.1862663389904 | 91.4446109489387 | 48.8319884367456 | 59.220967994972  |
|        | 51.7549258776884 | 64.5347406608537 | 55.1099824417989 | 107.91849682084  |
| CDH20  | 50.8388984085636 | 44.5152708955623 | 42.7303139017786 | 43.074472921841  |
|        | 44.7829632472754 | 38.2293008890613 | 40.1235656101329 | 44.4031868028216 |
|        | 43.4656637536244 | 43.0919221375514 | 44.7114813656401 | 45.9693232070002 |

|         |                  |                  |                  |                  |
|---------|------------------|------------------|------------------|------------------|
| CDH22   | 35.7012997405508 | 52.5868047927666 | 40.931294690669  | 40.3180310664156 |
|         | 48.6224651100733 | 43.7630587657205 | 41.4742337714895 | 42.5435283762933 |
|         | 35.2143190355414 | 43.0919221375514 | 39.3667161654772 | 35.7451401627836 |
| CDH23   | 46.8626801744519 | 116.685453817071 | 94.1206342908306 | 44.3557408297309 |
|         | 49.452985143568  | 58.2957814921605 | 69.5225793065367 | 78.9088042058577 |
|         | 59.3353474684952 | 123.350559552455 | 150.957220787781 | 64.9030399249327 |
| CDH24   | 45.7802253890958 | 42.985929467107  | 41.437237454134  | 41.3027031037343 |
|         | 40.1874619442128 | 40.650742261428  | 40.4882741869718 | 43.7658269153047 |
|         | 42.7711437826303 | 39.2623423164488 | 43.5367669381526 | 38.8862294018533 |
| CDH26   | 45.8546719310325 | 84.4349803529132 | 44.1452943804044 | 41.4812544772644 |
|         | 44.5668141895992 | 42.8598805316863 | 48.1747307200218 | 42.6808744813778 |
|         | 55.2635381074136 | 41.2276963324981 | 42.2455707947223 | 44.6946363672948 |
| CDH3    | 601.829364668202 | 104.409397223301 | 373.172504097546 | 99.0647786948132 |
|         | 166.572463787763 | 60.7488007939604 | 298.14782785085  | 203.759116151774 |
|         | 538.427311162325 | 193.519079768562 | 77.9085946827079 | 214.127390534906 |
| CDH4    | 35.6111578834671 | 41.159706131351  | 40.0998167098057 | 41.3027031037343 |
|         | 50.2163892855092 | 41.7627910693483 | 35.9894133432376 | 41.2551966132486 |
|         | 38.5252456306656 | 43.1839109702714 | 47.4630625313159 | 42.2577689927563 |
| CDH5    | 140.465247047676 | 195.430996540859 | 334.639325701194 | 272.981148492864 |
|         | 106.691530592115 | 176.43047680293  | 46.3057385979341 | 118.93749473833  |
|         | 59.5093038629766 | 90.8188865732032 | 113.169111095305 | 88.8330881965986 |
| CDH6    | 47.611018474151  | 65.5730163728961 | 73.4122412764173 | 49.8304479381623 |
|         | 55.3100442506299 | 44.4311655729487 | 41.0381860307445 | 53.7378346199838 |
|         | 46.4164127487052 | 49.6561029118699 | 41.1638563416981 | 50.8442982601142 |
| CDH7    | 39.5185194094434 | 41.9397336249742 | 39.673290670647  | 42.0605906240248 |
|         | 44.4954892619459 | 40.5710637884029 | 43.5627649099623 | 38.2083710281545 |
|         | 39.5806465938526 | 42.3346523186171 | 41.7677037290981 | 40.5207392413115 |
| CDH8    | 40.5654775358427 | 39.7835513496873 | 41.9666541498638 | 42.1273928203021 |
|         | 33.3231576795423 | 42.357910063876  | 30.9403229851671 | 34.3865306339645 |
|         | 41.863927676552  | 37.4302011516587 | 36.3390947880186 | 41.3481355128089 |
| CDH9    | 43.0930293831497 | 41.8848959280916 | 53.2046867327331 | 47.0874209746031 |
|         | 44.3557408297309 | 45.4882438975269 | 58.7585623394335 | 51.4360013601805 |
|         | 48.3954967265007 | 48.1392888470269 | 49.9338905397767 | 49.2064066614865 |
| CDIPT   | 57.0006212637829 | 56.1912096308988 | 56.7272804480684 | 50.6262443356159 |
|         | 59.6496385170473 | 61.9432904657734 | 51.5967098638347 | 56.8595344107711 |
|         | 46.2718838939055 | 62.4530276414691 | 57.5955320223035 | 53.1182952086284 |
| CDK10   | 209.794541970107 | 189.650905999631 | 314.091389958069 | 106.309161354804 |
|         | 190.422737436225 | 90.3439862484238 | 224.827414462257 | 143.112509176873 |
|         | 140.921774805792 | 228.778506556448 | 220.573371581491 | 147.137598111239 |
| CDK2    | 237.359267889848 | 209.099378471892 | 150.925721934159 | 152.329124189473 |
|         | 228.571334092678 | 150.941470539313 | 375.354746298695 | 389.422882761332 |
|         | 243.446420243813 | 123.219313750907 | 134.239606718101 | 221.123510823097 |
| CDK2AP2 | 64.9367707455078 | 81.7367617812869 | 88.2959958615748 |                  |
|         | 95.6215575902122 | 88.1199908664065 | 70.8674195845729 | 144.593933058291 |
|         | 102.717305041352 | 129.958419679179 | 86.8691342571214 | 111.656567824564 |
|         | 112.944044862693 |                  |                  |                  |
| CDK3    | 50.379587451669  | 54.3554233228353 | 53.5698357689852 | 40.9607305725196 |
|         | 62.1836961153924 | 45.2852528185486 | 57.4047331041592 | 57.445796273665  |
|         | 57.4777075615651 | 73.6240672213673 | 64.4570366205389 | 52.2832912331043 |
| CDK4    | 588.736435715365 | 557.094756796515 | 287.363928615517 | 338.000998124097 |
|         | 611.538630852232 | 437.280601907944 | 853.117321142008 | 701.168333137671 |
|         | 656.355333007615 | 321.21879937379  | 307.445116836976 | 303.818507395434 |

CDK5 124.095181002305 87.9963662401769 102.500172212095 100.001150612051  
102.372855708929 75.353039684456 92.0880591999243 84.5055910320032  
121.142787642824 72.3297091475814 78.806097512943 81.3082994649699  
CDK5R1 56.7776874358774 53.4439773326843 41.924725226806  
51.223859150798 59.4153120842154 41.408887993053 47.5963750520409  
49.2019743609873 55.6991707857987 40.0557788909923 43.0016969050339  
40.3691324547049  
CDK5R2 41.2424637338424 38.2263227947189 39.3709357615493  
39.2780515621926 35.6434124419782 38.6414316877471 40.1235656101329  
42.157627240486 43.0930293831497 41.8613406887824 39.5399188536544  
38.3291713594599  
CDK5RAP1 101.560929859785 85.352285669007 115.408418935236  
88.051652677564 133.64996113791 96.143327683221 106.668282281471  
122.702789229752 121.696160351886 103.447730395424 112.881899194726  
101.935321521672  
CDK5RAP2 98.9463403584348 99.9486407529027 69.3181565573028  
118.186590679218 94.4501786945034 140.01041112896 150.051297690759  
127.283778555702 99.0596863442346 106.590506599473 134.936657884035  
95.2614267797703  
CDK5RAP3 400.093769705765 308.025419469334 589.18407096044  
212.117653688186 527.037018015766 217.875223856197 360.900649927623  
343.346644539158 273.645674189546 422.474427987338 326.250872625748  
287.932410610182  
CDK6 71.2963721541702 67.4018925617901 101.187156681366 127.789065386943  
55.4919197421746 113.612874206329 70.2635892414678 64.5257016285499  
87.4335749014848 97.4769942713663 85.8277891453447 105.293665242737  
CDK7 140.853812988562 128.885933852704 116.839274984089 97.2220312216969  
118.885205874725 84.096146903568 88.7029126110977 102.085154509866  
127.115038236278 86.9626166234066 102.610376474754 135.718484174661  
CDK8 50.8388984085636 61.0144918827511 66.1541420734416 50.7046706880325  
79.271901834289 84.5913809068614 73.8313212063649 53.7378346199838  
69.3300058073438 48.0211752672327 50.9815930710768 79.9447969637409  
CDK9 166.752205770965 177.602690452814 127.694844372277 103.530430972911  
144.578232267116 114.389392280707 139.472956453414 123.022511916727  
118.862494537893 161.588263691127 157.592292551459 148.42234459694  
CDKAL1 67.2437599548936 63.1137861754989 82.9449579428926  
56.7927450229377 126.492854172749 75.1674447943072 163.995560004001  
63.4570909617664 57.3385421837183 53.7196173866021 64.6446465846487  
75.7991766454243  
CDKL1 42.8036731479932 49.3581578587582 38.6005272730664 42.4580504587581  
49.7235523248653 57.3797835448761 49.1067959632109 50.3972033014227  
45.3756389170606 54.6089451252049 54.4825201506931 49.5539622682049  
CDKL2 38.0089018744739 35.7818918460549 37.1188989884324 38.0958223740111  
39.4693871570028 37.3799542961839 38.6537063231682 37.6557714476853  
37.6630259432398 37.3179578037963 36.8282383070068 41.4508241771315  
CDKL3 49.1868644496737 45.620219291723 50.4662238169527 63.0153175111747  
45.6409129284202 59.5979861826984 47.7390230243778 45.3389970694851  
51.3511088648386 60.2877434874622 52.9567386506107 73.4876346170053  
CDKL4 36.7356360093603 38.1312950900467 44.3344900481112 43.8002456102021  
50.6470461863549 43.0860383229288 40.6750540874299 38.956280281655  
39.7537274655115 44.6918600441328 44.7926323492519 42.8864415494484  
CDKL5 42.2455707947223 40.3021896270845 44.5622847010474 42.1607322031054  
39.5317722761104 39.4469765850607 44.14228771963 42.0494116081998  
38.9834959368496 39.6333888530279 38.9087995969091 38.3880780363593

CDKN1A 223.826005691932 667.837116137964 1199.29782389306  
920.504890206997 275.975192937951 1239.68399088145 409.433491782481  
371.709014310561 576.367042159347 820.147156401172 636.367246129079  
564.468049419762

CDKN1B 112.306016029829 177.535502927617 125.690995228055  
185.28845113422 147.209004629384 140.393549614927 180.648144492464  
194.666769955149 236.910422092851 147.300356318739 129.810477623628  
145.391705645319

CDKN1C 80.8943070653517 95.39134217438 84.4443931765378  
73.3725472767369 66.0411740221276 185.360921731157 128.024853362102  
54.8412943008635 130.925724760241 131.973056760893 151.652543512032  
111.071209057746

CDKN2A 70.3757673501097 49.386089018323 45.9240324357072  
43.9282059368202 139.945446129591 46.9613376350744 177.912351477808  
55.9927099883616 111.939677225005 39.0209841108908 44.7765484590865  
39.901614985832

CDKN2AIP 96.0236731791095 93.1067450332473 94.6130003107132  
90.9106103192162 108.168107241759 109.352296288717 100.139490974785  
102.49785018292 102.063594231253 73.8313212063649 83.5069968129733  
108.479856042609

CDKN2AIPNL 4235.59743465057 2779.37660132136 3001.25236839028  
3190.0108307463 1876.51621222292 1294.42501356365 2803.11698341125  
5566.52516420571 2331.12401106076 4665.45637589484 4597.60989502097  
3465.3013599062

CDKN2B 95.9485602132766 56.7668947356134 56.5357495488911  
55.9521647240225 59.3611824459962 60.0502421545569 73.7335870746827  
61.5429260998857 86.0735583144514 57.4151953663881 54.4140381300469  
61.356483470053

CDKN2C 46.581796165231 49.0069391697542 51.8122261766744  
53.3094843669564 37.7576900881741 85.8995211302699 42.57175366709  
46.1673159982664 95.2956103624468 48.5571567616945 49.81481191219  
51.9950964009224

CDKN2D 61.8124171056747 59.4253780950488 57.2107492415265  
112.13936276116 70.0133734659853 100.650129064849 106.599578931817  
66.7106881373359 73.6965494979349 55.3477556906605 52.9567386506107  
72.5918913856713

CDKN3 77.8130233266962 79.1822591641672 73.4122412764173 63.6334154351075  
82.5344501505114 50.9724155054821 84.607833108004 109.241121384212  
140.01041112896 41.1222709786153 41.6336636285875 44.2527566343661

CDO1 47.4678477186801 38.8336427948187 44.6511073781104 41.6045220683604  
69.0975200641705 129.951091959262 40.9157352260901 49.6203214143464  
46.2718838939055 70.7003843117511 66.2027948645675 66.274247400793

CDON 41.9823787224629 37.7384958256497 39.8617019260946 40.0337926471478  
39.1650142708257 40.9506062495231 38.5442780220289 39.6474008369935  
38.5019918517688 40.9506062495231 39.4736654224088 41.5083179498332

CDR1 41.483412492426 39.0578297166485 37.9003288112261 37.29566077996  
38.1644569189523 40.7063426028871 38.977631784251 38.5086872173449  
38.4344387289956 33.4316681623175 39.7342718293432 39.6833800000587

CDR2 209.524518082089 331.762920362224 178.156332261759 189.47090669378  
212.353676518748 263.44529683749 206.814831223864 454.939614583134  
169.500205172068 453.115133900701 382.312820492386 416.40156274382

CDR2L 660.295993198711 363.215063520042 264.495576211074 209.004669589169  
625.805967352327 304.298036741211 608.579654909865 759.94822128584  
401.956364010068 164.642060754649 146.969565088793 187.462631817772

|         |                  |                  |                  |                  |
|---------|------------------|------------------|------------------|------------------|
| CDRT1   | 40.2209794935386 | 48.2220547806679 | 43.8495248991589 | 44.604338271769  |
|         | 43.4812166409346 | 44.2335949843431 | 38.7337086062875 | 51.7866317456986 |
|         | 47.8485718564184 | 40.7063426028871 | 44.1478805895017 | 41.0269624684418 |
| CDRT15  | 41.8409927585705 | 37.5469247328848 | 44.4311655729487 |                  |
|         | 41.0726336841311 | 42.6022652963326 | 48.6621527194963 | 43.0930293831497 |
|         | 44.797320243931  | 47.1744296124496 | 42.6793753550854 | 38.2795150354677 |
|         | 44.9070250604284 |                  |                  |                  |
| CDRT15P | 38.2083710281545 | 39.9697332660833 | 43.9450023643394 |                  |
|         | 33.8111782249716 | 46.3150221024046 | 37.4782441311626 | 41.4742337714895 |
|         | 39.1652965788406 | 40.8970401536578 | 41.7405682794166 | 39.8184668132023 |
|         | 43.0930293831497 |                  |                  |                  |
| CDRT4   | 89.8567957512307 | 103.104022477607 | 138.618449365819 | 86.1703662107384 |
|         | 73.2607982527105 | 68.839885767937  | 77.118454956956  | 125.333208461509 |
|         | 81.1416376689959 | 231.060688044554 | 155.287591646469 | 130.865421554474 |
| CDS1    | 104.573463811298 | 252.134800295199 | 141.293219914385 | 62.3936376596431 |
|         | 86.6854406823303 | 59.1570467228834 | 188.552900887757 | 566.318259999405 |
|         | 137.302487233881 | 262.277293680018 | 223.562130663956 | 178.98901256658  |
| CDS2    | 161.910748720932 | 170.932645135423 | 150.011814577972 | 259.220844287491 |
|         | 213.933347509147 | 166.064317271991 | 169.723009455614 | 156.56745342836  |
|         | 116.17887995398  | 166.648551193168 | 165.942795019496 | 143.6667863386   |
| CDSN    | 37.4554876386402 | 45.4882438975269 | 39.3709357615493 | 43.3078542962968 |
|         | 43.2484996523549 | 40.4359177791566 | 38.4005795891396 | 39.2672712041774 |
|         | 37.0126425326534 | 37.5343260962758 | 40.547835538778  | 36.3454320848591 |
| CDT1    | 104.462230406058 | 107.331284864757 | 90.807818984128  | 42.8235313007746 |
|         | 140.369714831352 | 51.294537308199  | 268.613247119583 | 97.5962784863854 |
|         | 168.7696164772   | 34.3674468322242 | 36.43924066428   | 43.8575940017119 |
| CDV3    | 176.866350130563 | 137.955007835039 | 147.782301091454 | 251.374750265492 |
|         | 202.360546931172 | 193.569399061809 | 131.808634405319 | 151.601402122351 |
|         | 133.765486891316 | 94.8742116922003 | 107.453572798098 | 173.212430860273 |
| CDX1    | 46.1673159982664 | 39.7835513496873 | 43.4709415392696 | 43.3078542962968 |
|         | 43.7517118200398 | 38.5252456306656 | 46.1634822993009 | 42.5435283762933 |
|         | 42.6366765186182 | 42.1622837416589 | 41.0050831223107 | 42.0424641526302 |
| CDX2    | 97.2535496140648 | 62.0220558452834 | 34.6977013306396 | 39.7411455670172 |
|         | 44.2607789091176 | 43.6670755115848 | 213.622816589927 | 92.804679821289  |
|         | 53.2046867327331 | 39.5637454855233 | 40.3452320167286 | 43.5738557773903 |
| CDX4    | 34.3473914754963 | 36.5219488315447 | 35.0970060242246 | 33.4819739460148 |
|         | 40.3452320167286 | 36.1190722948669 | 34.4570158133896 | 38.2782436497441 |
|         | 39.0775870687758 | 44.571915452417  | 42.4580504587581 | 45.7562276914441 |
| CDY1    | 40.4639532172338 | 42.3647968647967 | 41.9335763813389 | 43.1847628331565 |
|         | 43.0860383229288 | 40.3969295784597 | 41.4244721780607 | 42.2577689927563 |
|         | 39.1433524273815 | 39.6205203043973 | 40.8730692351493 | 41.1914475733743 |
| CDY1B   | 39.512606833112  | 34.1910413697549 | 42.4804257679172 | 40.8084239472012 |
|         | 37.5079203359641 | 38.1569957197319 | 43.4544762830742 | 38.3269307390572 |
|         | 39.0775870687758 | 38.3561682218911 | 41.7608506445769 | 42.3288275690551 |
| CDY2A   | 37.7384958256497 | 39.5050383901884 | 43.4709415392696 | 40.646702696033  |
|         | 38.745552403895  | 44.8872784170036 | 47.1345949868029 | 42.157627240486  |
|         | 37.4540772310118 | 45.9004543328976 | 37.7384958256497 | 40.2669497398702 |
| CDY2B   | 42.1537476443423 | 41.2598458726002 | 40.4070046183108 | 33.8111782249716 |
|         | 38.4540849632254 | 30.7058829591553 | 38.1793598983615 | 46.0633179231318 |
|         | 39.3750969348308 | 38.745552403895  | 39.8184668132023 | 38.6454098044474 |
| CDYL    | 69.9431447778061 | 55.9459886217809 | 57.9279989359711 | 48.4916117779992 |
|         | 91.3723635213821 | 57.7463129434768 | 50.0088611244948 | 42.8936990772838 |
|         | 103.010279797396 | 57.0581769379589 | 55.0823430906161 | 56.0477607422828 |

CDYL2 56.0477607422828 43.683792219729 47.9035532886869 45.334106390212  
42.9090346219023 47.8636003588181 46.1634822993009 49.2019743609873  
49.0986627051784 44.6918600441328 43.844855336215 44.3521099857368  
CEACAM1 287.363928615517 148.964204638494 130.792245267896  
190.77754486426 98.403191200835 63.5195937348531 70.9462008788871  
160.853643241489 222.126944340681 98.8922486048877 99.3744103955071  
187.238252376588  
CEACAM16 39.8662795144616 39.3999056968598 51.4308501933893  
38.6414316877471 40.5710637884029 41.3553369544097 38.8417151851134  
42.8482181313226 44.0519245668737 39.7835513496873 43.0016969050339  
37.9607839934735  
CEACAM19 43.7585538437696 40.9731067463382 41.8751578329365  
43.074472921841 43.2484996523549 46.1513019317765 40.1235656101329  
51.4360013601805 43.0930293831497 44.3648993568405 47.5439485437351  
42.0424641526302  
CEACAM20 38.8561375693335 40.5400384479766 35.2101597814352  
42.5664883002833 38.4540849632254 38.8336427948187 34.9344532055397  
37.1317006162938 41.6616444147804 40.4136535208406 36.5359455830388  
37.4554876386402  
CEACAM21 48.8941062980393 45.7979032939211 42.0621425894624  
49.1786207920603 39.2608760193011 41.4508241771315 42.7431359850339  
44.5029690493211 40.5912213523345 44.2580151149956 41.0050831223107  
39.2469742642337  
CEACAM3 39.1590964332473 37.3634897565502 39.8299340037009  
123.281175151414 41.6806984441849 44.1737502492846 49.8281348927244  
43.4544762830742 43.0930293831497 38.1042454705119 39.4410515050885  
37.3600014814388  
CEACAM4 43.3638918705225 45.2556760873335 44.2405728317107  
64.2130157241811 48.2748123114598 40.4359177791566 43.8206425661746  
37.2237132058632 45.6582729799009 47.7180816682562 41.9908237694988  
41.9430737035925  
CEACAM5 220.682149473323 83.7019398654324 35.5220586859301  
43.9282059368202 46.0043807840705 39.7394181011603 40.2154497375715  
42.9301944191913 41.9635525160083 40.3235655331796 41.9083581529276  
40.8681871019812  
CEACAM6 2237.08790397818 403.92758879201 65.5820437889838  
185.812520354849 33.3231576795423 36.2768299545794 72.2577390063259  
204.318269745079 57.9713749600418 33.4316681623175 36.43924066428  
40.1700117452801  
CEACAM7 222.81957100654 50.6229884142872 52.5353664902258  
40.7481155008596 41.8806343997257 40.5281496800812 36.197424053556  
39.2672712041774 38.1169703906207 43.1839109702714 35.1470994647364  
40.9683275553869  
CEACAM8 107.637618676176 37.4540772310118 41.9666541498638  
36.7892997857376 40.6723334103791 41.2567470068038 42.2577689927563  
40.047314525032 42.4540072551568 41.3321861371202 42.170702295259  
45.5800840647989  
CEBPA 124.095181002305 851.813216452015 276.86542239106 204.502683458676  
866.712228831149 240.520228413182 724.881002237334 704.15545332905  
644.733901442573 479.079946537291 430.618167106529 198.729330487352  
CEBPB 4569.48246031279 1810.67209360676 3562.96193568469 9060.10165509099  
2844.5506310828 4632.08655821299 3592.44409869527 2779.37660132136  
2844.5506310828 952.16345035163 1810.67209360676 1999.21832626916



|        |                  |                  |                  |                   |
|--------|------------------|------------------|------------------|-------------------|
| CEBPD  | 701.551782736435 | 1255.10866316499 | 1213.3477481374  | 1975.28674300761  |
|        | 2206.44541412808 | 5855.6498679729  | 2498.54878472152 | 1427.67429455277  |
|        | 994.404707955031 | 1190.10462185567 | 2215.01815680371 | 2004.94135236716  |
| CEBPE  | 35.2267149016596 | 46.29198852834   | 42.7303139017786 | 57.8277957325085  |
|        | 44.6834648302383 | 39.3841861812262 | 45.3597029614942 | 44.4031868028216  |
|        | 47.5564423692142 | 39.6719190054379 | 43.9450023643394 | 40.1700117452801  |
| CEBPG  | 160.320045581768 | 209.178131628825 | 140.992072231913 | 137.831070407907  |
|        | 350.278532614563 | 261.51893439249  | 359.465715235071 | 163.995560004001  |
|        | 391.187784616808 | 209.401109514058 | 183.2003374677   | 240.265816943765  |
| CEBPZ  | 440.93348620369  | 414.794323433931 | 324.320137371059 | 505.018127833201  |
|        | 484.968116511768 | 588.247843264181 | 634.023101883136 | 637.035929429013  |
|        | 324.126628444078 | 428.8440159628   | 405.148979342648 | 541.631969808467  |
| CECR1  | 171.623830248512 | 202.103107745135 | 160.385057525357 | 726.804513440787  |
|        | 192.318724749487 | 126.232262861308 | 296.080833914967 | 155.872353189452  |
|        | 135.889195284785 | 172.102568448455 | 114.5696064637   | 164.580141651883  |
| CECR2  | 45.2875173643252 | 42.0709558258414 | 43.6670755115848 | 38.2041059863839  |
|        | 41.9842695818285 | 40.9506062495231 | 55.2088411137193 | 43.0390857698452  |
|        | 45.4799270968969 | 47.611018474151  | 44.1148826235374 | 40.5703581862752  |
| CECR5  | 268.54298415337  | 297.739286969257 | 228.747320301945 | 232.13042919324   |
|        | 271.138311888031 | 168.073605090354 | 317.777971035617 | 226.672191323896  |
|        | 381.6928205836   | 227.206974078547 | 214.691909801388 | 240.58403560014   |
| CECR6  | 54.7786516309154 | 45.9266745571724 | 45.063792968927  | 111.703187941409  |
|        | 41.9842695818285 | 42.6575535390785 | 53.0277416531043 | 55.9303347977781  |
|        | 52.4539007817929 | 42.9866214102525 | 40.9157352260901 | 40.9683275553869  |
| CECR7  | 136.530734456168 | 84.1922656126304 | 118.854313907627 | 211.790532633462  |
|        | 93.1238695478498 | 191.811190401876 | 91.0154871536701 | 164.813928846511  |
|        | 101.954354107731 | 267.107863045114 | 185.312851727212 | 134.307645598718  |
| CEL    | 69.9431447778061 | 93.2630594602634 | 72.7987593815919 | 43.3078542962968  |
|        | 99.8699868526053 | 52.2089306840125 | 77.0003455479124 | 60.6706478075023  |
|        | 166.717256080341 | 201.530434441408 | 86.7730065232892 | 88.3636380348802  |
| CELP   | 39.8662795144616 | 36.3110701990588 | 40.8420925848403 | 44.1483976313959  |
|        | 42.269054475455  | 36.9060997041453 | 40.1235656101329 | 38.079222289614   |
|        | 44.8997235283254 | 40.8049408996274 | 39.153226699662  | 39.6352613956998  |
| CELSR1 | 64.3502363726659 | 64.1607001437806 | 58.637422084759  |                   |
|        | 70.0402992940342 | 66.8733921725051 | 64.7905331739366 | 52.2476631126873  |
|        | 48.6441988290952 | 59.0563795877672 | 64.2174369755376 | 58.4816190076338  |
|        | 63.3578893149245 |                  |                  |                   |
| CELSR2 | 53.3059058105836 | 44.6918600441328 | 58.2986825661503 |                   |
|        | 38.4208429103799 | 67.0163226819964 | 41.0582900711341 | 47.8947595316832  |
|        | 66.9340967279385 | 81.2850357499192 | 62.6984594468418 | 53.4088637045445  |
|        | 56.7711602236706 |                  |                  |                   |
| CELSR3 | 217.976796656266 | 68.6074516459969 | 91.6033269431304 |                   |
|        | 58.5406981871153 | 259.906934432819 | 55.0009147092272 | 241.017227991238  |
|        | 131.67159377585  | 183.526640731647 | 45.9004543328976 | 46.8954576545929  |
|        | 41.7575097298927 |                  |                  |                   |
| CEMP1  | 36.9060997041453 | 38.3322849790657 | 35.9305494063137 | 47.9915414951747  |
|        | 37.7576900881741 | 39.8455060654531 | 47.7390230243778 | 36.8400213077707  |
|        | 37.5469247328848 | 39.4710743516517 | 35.4386677371439 | 39.2469742642337  |
| CEND1  | 44.9896851005259 | 41.6466169548846 | 45.063792968927  | 41.3027031037343  |
|        | 41.1868052124344 | 38.8336427948187 | 44.6032218589199 | 41.6466169548846  |
|        | 44.8997235283254 | 50.22432299342   | 42.170702295259  | 45.4799270968969  |
| CENPA  | 119.714551585774 | 82.1062834830477 | 62.5194460957899 | 53.0284011078097  |
|        | 163.299997237276 | 53.565717255469  | 134.968128884298 | 130.2304824445573 |
|        | 152.792457231813 | 44.3648993568405 | 43.363245077835  | 44.3521099857368  |

|        |                  |                  |                  |                  |
|--------|------------------|------------------|------------------|------------------|
| CENPB  | 700.010354583503 | 757.833254346899 | 672.759115794267 | 523.25106120389  |
|        | 893.185203928127 | 1157.65264077595 | 1048.98028527123 | 513.891389190131 |
|        | 695.255317861845 | 886.397061577531 | 1051.58050264114 | 839.850453078119 |
| CENPC1 | 48.8333989709933 | 43.8495248991589 | 43.401782064778  |                  |
|        | 40.0698728584484 | 46.0977687311222 | 39.3841861812262 | 44.6032218589199 |
|        | 40.7311497914871 | 50.0526763693329 | 45.3530683538086 | 47.8284278211109 |
|        | 43.3744503319109 |                  |                  |                  |
| CENPE  | 68.2184093305248 | 104.305801811472 | 85.1981126713031 | 60.7148442408147 |
|        | 114.161435210562 | 46.1974343793412 | 115.98265270452  | 91.0952554578659 |
|        | 110.312681023811 | 45.5776159432079 | 44.2925355984056 | 44.4475838947656 |
| CENPF  | 291.232601825013 | 120.825113658705 | 107.034189847828 | 59.2778887402357 |
|        | 269.618616631857 | 56.8505380943422 | 338.415128695208 | 428.515605971056 |
|        | 217.39432336811  | 40.8970401536578 | 41.6336636285875 | 45.9693232070002 |
| CENPH  | 42.1679276329916 | 43.3016395799961 | 48.4890615340603 | 42.4580504587581 |
|        | 44.147557390293  | 42.7107928951766 | 44.4045701012801 | 44.1311654985682 |
|        | 41.9083581529276 | 44.4652605017595 | 40.5824352835642 | 41.2437378488025 |
| CENPI  | 46.263826584899  | 47.8947595316832 | 38.2593044488288 | 41.3567204694281 |
|        | 52.2089306840125 | 44.9896851005259 | 56.9320717885002 | 56.8595344107711 |
|        | 52.6144123387561 | 42.5193208629123 | 37.6484782516569 | 40.3691324547049 |
| CENPJ  | 67.2437599548936 | 60.5571721986885 | 52.3432130135266 | 50.5310598656998 |
|        | 67.6011992144113 | 57.678188678075  | 72.6959688212342 | 62.9922928277769 |
|        | 59.9108736364178 | 77.676210875358  | 64.830448408529  | 54.4992295592001 |
| CENPK  | 86.4195039096886 | 100.483113678344 | 74.2769881586739 | 52.1201052574162 |
|        | 115.408418935236 | 52.5330333302271 | 108.007227281411 | 78.0020909283414 |
|        | 112.014137492029 | 42.5664883002833 | 51.2318935933116 | 56.4578213622965 |
| CENPL  | 77.0301627655229 | 60.3928833351886 | 60.8357760968871 | 45.4634652319753 |
|        | 83.0497574039035 | 54.8265655909623 | 61.6544855697851 | 47.7889447429963 |
|        | 65.8622973953004 | 43.9450023643394 | 41.4508241771315 | 45.9693232070002 |
| CENPM  | 108.479856042609 | 93.146085697072  | 84.6935029586625 | 64.4512696384839 |
|        | 110.517563101892 | 48.5251714843637 | 172.748740911831 | 146.046179302584 |
|        | 223.501516374076 | 40.8970401536578 | 41.9908237694988 | 48.4835379173794 |
| CENPN  | 125.540457221408 | 100.483113678344 | 112.328675926999 | 94.3229189690855 |
|        | 107.549325444455 | 56.0477607422828 | 153.643631245787 | 158.195749606017 |
|        | 207.087723777954 | 58.2818491355907 | 41.9908237694988 | 68.8529879402902 |
| CENPO  | 50.7774722329703 | 51.4749724393807 | 51.4308501933893 | 46.614092935749  |
|        | 73.7741438283854 | 47.5733603903505 | 66.7750249658122 | 90.1430468048409 |
|        | 59.7961440557352 | 50.4234835272833 | 42.9634662926872 | 41.6031169661721 |
| CENPP  | 82.8485522398913 | 74.3729155936862 | 60.4809187893259 | 66.9218519793499 |
|        | 95.2833228196616 | 57.4777075615651 | 67.5206810636627 | 54.5125550937898 |
|        | 53.5224822626949 | 57.2813205536176 | 51.4413099192899 | 43.5738557773903 |
| CENPQ  | 58.7404123614695 | 55.2182004838121 | 49.2041300973417 | 50.7046706880325 |
|        | 52.8190882379316 | 46.7800033479223 | 46.1634822993009 | 46.2779564481158 |
|        | 51.8083208406279 | 48.4890615340603 | 48.2050207071554 | 51.0013344286851 |
| CENTA1 | 564.929183025034 | 492.519023728038 | 293.300203370043 |                  |
|        | 449.701353531924 | 372.758184542037 | 290.535354193244 | 369.717462266442 |
|        | 606.761670821739 | 271.813877560354 | 309.06234888929  | 292.065366215278 |
|        | 401.679080975109 |                  |                  |                  |
| CENTB2 | 70.9419509323007 | 77.7481370715949 | 71.6354627933716 |                  |
|        | 111.186223357396 | 97.6205705034407 | 86.2563919366781 | 93.3897477314201 |
|        | 86.5926014007562 | 81.6508259258669 | 76.0532592222027 | 70.2606858200937 |
|        | 81.2068428211497 |                  |                  |                  |
| CENTD1 | 49.7827734675743 | 48.6447083765118 | 49.8845794776469 |                  |
|        | 56.7351380543324 | 42.8414096678708 | 47.4119039314844 | 44.7915315085948 |

46.8954576545929 49.5539622682049 46.1390887492649 46.9950086252052  
54.761682143135  
CENTD2 71.4937262725923 58.0218262176065 43.5710871617107  
81.2269477373795 55.6069214673486 61.7091923488929 64.0291286735557  
65.1637149462661 59.8509516999438 59.5297504864052 57.3417959180493  
56.4873776344986  
CENTD3 155.762961582213 269.044011137638 530.314249832491  
221.163225922749 192.564048264712 124.490684428024 203.127486721124  
193.196385709124 323.855522995794 548.217757366495 425.435793468733  
465.981133154896  
CENTG2 135.829530518199 139.554519110944 85.7111041637416  
56.4578213622965 177.620987812591 136.913434348036 91.6978282652998  
159.071016200059 108.27606179864 75.7801512652102 79.9567256807679  
96.5813769696577  
CENTG3 223.219262492785 378.626656077546 190.403032965372  
266.717224821545 239.924746743429 176.871009816977 195.108184885541  
171.705718494906 223.88063506365 331.935072199058 235.925374041038  
183.702709922933  
CEP110 62.6702927225656 98.9988668602468 84.8948024208923  
114.520410790135 75.0665411373616 83.0554837248934 101.375030043104  
69.3468840908665 76.4796910268368 85.7732262204681 82.8205269728224  
79.5898953726467  
CEP120 54.931538325692 53.4735821194294 56.607199625498  
60.9379216295576 44.8897737954573 59.0686629877982 48.8319884367456  
44.293922970134 50.8485682149772 38.2069499294002 46.4205654140754  
51.0647893605839  
CEP135 124.37984507038 165.606015336587 126.420070148631  
156.976072444343 199.54796711653 94.1128427766432 125.052841200703  
154.248946683126 139.328628553223 106.897106266912 117.033529761587  
106.20479137406  
CEP152 51.540723788287 57.4966000742671 50.0050760710506  
46.9919960628953 64.9839099669442 50.6915708372926 56.8505380943422  
55.6282425338897 53.2046867327331 47.611018474151 49.319499137678  
50.6141827957642  
CEP164 147.371811804618 95.2833228196616 94.0749342825094  
101.008449241109 127.46182304081 108.08526252608 119.015431849218  
163.917208464731 90.9810377546009 117.033529761587 135.138667957956  
82.0124493733776  
CEP170 43.4626049853157 44.5491926807637 41.7364024833895  
49.6641575194943 46.0977687311222 44.9411655353314 46.7704450730477  
42.8978721487095 47.9525424951159 41.683412864532 42.881371896984  
46.0201052072883  
CEP170L 38.7277789106124 37.7598032934773 38.6414316877471  
40.7481155008596 40.2449343247539 43.1012097821911 40.0603121770344  
42.0730322247777 37.8631570409126 38.904137905631 39.7342718293432  
41.9741368971524  
CEP192 72.8472187581193 112.281286038716 134.896696950857  
82.1437429222046 97.7153995525346 75.854888525664 99.5844079573552  
95.0026207727863 114.363816429963 83.877343750194 73.3321469094819  
86.2974544521879  
CEP250 49.3000844711116 49.2934904960601 46.2625470410195  
45.4634652319753 49.7526478730976 51.1621379498014 43.6753843488695  
47.5950227477807 50.8485682149772 52.2832912331043 47.5733603903505  
51.8562635270111

|        |                  |                  |                  |                  |
|--------|------------------|------------------|------------------|------------------|
| CEP27  | 289.05213385509  | 122.576931376426 | 157.281394920992 | 293.355303451014 |
|        | 130.936053902005 | 128.657014567195 | 255.197732321307 | 555.356799014777 |
|        | 128.786137360755 | 374.601792595646 | 302.083293019113 | 269.184000351658 |
| CEP290 | 57.0006212637829 | 59.0709442090059 | 64.0162246399972 |                  |
|        | 49.1786207920603 | 51.3511088648386 | 68.6424653037264 | 55.8019623191927 |
|        | 61.8665316900291 | 61.4842573582507 | 68.534940191185  | 57.4622430729629 |
|        | 66.4626619269287 |                  |                  |                  |
| CEP350 | 90.2721521466478 | 116.74427460886  | 113.051477801522 |                  |
|        | 151.740176274202 | 98.0143500562821 | 96.5287245311078 | 97.8309399470621 |
|        | 128.38299874379  | 84.2299424587647 | 122.350248266459 | 126.79509061532  |
|        | 126.115065200084 |                  |                  |                  |
| CEP55  | 109.738537924214 | 126.389908470189 | 86.1563473462864 | 83.014860007187  |
|        | 164.312946712409 | 49.8472708021525 | 217.848539722853 | 171.705718494906 |
|        | 172.624182951104 | 41.2276963324981 | 42.6366765186182 | 52.1186591838715 |
| CEP57  | 47.1962846565261 | 46.5650556481721 | 53.9612654850046 | 47.9915414951747 |
|        | 49.9493230064613 | 49.4157684139858 | 56.2181240696479 | 51.8347877274018 |
|        | 61.8445915808329 | 54.7827221235949 | 48.3847843498476 | 47.2131144508464 |
| CEP63  | 64.9367707455078 | 69.3525901554637 | 84.0305689846475 | 80.8078050043929 |
|        | 79.9719218603993 | 86.4898752526885 | 73.2144205844199 | 78.0020909283414 |
|        | 72.8653205184014 | 73.6240672213673 | 69.036463612998  | 89.7184505543918 |
| CEP68  | 45.9090659324223 | 55.7405934254857 | 48.1997158668729 | 46.8954576545929 |
|        | 53.3086645804786 | 72.8472187581193 | 54.8074655158941 | 57.1362071277099 |
|        | 48.3119523820103 | 57.9713749600418 | 64.2174369755376 | 66.0786923699684 |
| CEP70  | 97.1271615802556 | 55.4106986624448 | 62.3245608177257 | 47.0874209746031 |
|        | 107.770004093887 | 69.0530953932111 | 119.609614885616 | 87.7295604723036 |
|        | 119.512426152446 | 84.0691608193405 | 78.963270461629  | 66.6118713143653 |
| CEP72  | 46.6348258763289 | 50.2696827764943 | 45.3974838013476 | 41.1886975241176 |
|        | 120.825113658705 | 41.159706131351  | 73.1654226019863 | 38.3684202018524 |
|        | 52.7512110769042 | 42.8936990772838 | 41.0808257270221 | 38.0452862258803 |
| CEP76  | 45.2875173643252 | 49.6841415268611 | 48.9944486068347 | 43.4410741327254 |
|        | 45.5809132232681 | 45.8325181856483 | 40.6750540874299 | 43.4544762830742 |
|        | 54.8946088631931 | 41.9666541498638 | 52.7817052791259 | 45.5800840647989 |
| CEP97  | 33.8558232866797 | 37.8217989841918 | 35.4484652445078 | 39.7411455670172 |
|        | 36.4434672195785 | 36.3845892764084 | 35.8227939208521 | 34.8949555140527 |
|        | 43.1805016690297 | 39.7835513496873 | 32.9879066304034 | 39.6352613956998 |
| CEPT1  | 131.126942328593 | 110.609133094021 | 125.061012833314 | 170.644636226884 |
|        | 143.399636653204 | 124.599352191013 | 122.877322487518 | 129.268600210689 |
|        | 182.9407471819   | 118.501031900986 | 117.20232751191  | 169.344094528032 |
| CER1   | 38.385865183581  | 39.4629815741023 | 36.7172300749476 | 40.8084239472012 |
|        | 40.3021896270845 | 42.2114134935898 | 39.3999056968598 | 39.2248354955045 |
|        | 39.5806465938526 | 37.2686490268265 | 41.3234441859498 | 39.2469742642337 |
| CERCAM | 383.371300272181 | 62.5528124447176 | 93.310557793228  |                  |
|        | 149.426965431854 | 101.681822254799 | 148.255880793905 | 116.74427460886  |
|        | 138.666805923912 | 91.6978282652998 | 115.643361390258 | 116.839274984089 |
|        | 99.9685666586407 |                  |                  |                  |
| CERK   | 113.791456064084 | 91.8207081349104 | 79.9391673512018 | 197.070092523652 |
|        | 119.45528139824  | 149.639066617945 | 89.0203733091224 | 86.0944261788554 |
|        | 77.720889005668  | 104.462230406058 | 94.284665243755  | 85.3431175579775 |
| CERKL  | 36.4564050256915 | 36.8285908669795 | 35.5220586859301 | 37.8153135197325 |
|        | 37.29566077996   | 39.5581166303303 | 36.5783930720979 | 38.6151680924119 |
|        | 38.3867490877227 | 37.4642807402741 | 35.3042041383893 | 38.7012264805355 |
| CES1   | 61.0278709944136 | 45.5533570914817 | 52.7005092555102 | 125.52123746909  |
|        | 39.3100256336821 | 110.589130460258 | 39.3585350448719 | 62.5528124447176 |
|        | 38.2795150354677 | 79.4158467034017 | 80.5237920647059 | 54.1618170692792 |

|       |                  |                  |                  |                  |
|-------|------------------|------------------|------------------|------------------|
| CES2  | 104.492750153479 | 199.604105066243 | 243.403622361932 | 112.13936276116  |
|       | 78.6286416672119 | 147.945429978177 | 107.668663185697 | 141.180682718758 |
|       | 118.089250727398 | 166.064317271991 | 161.075134901675 | 152.942332679485 |
| CES3  | 42.0833588105728 | 43.3458769998118 | 49.0655215909632 | 48.055683217958  |
|       | 42.2455707947223 | 40.8970401536578 | 44.3440839686558 | 44.9631458622215 |
|       | 42.2248608921879 | 46.0119912782855 | 44.3763859390287 | 46.8129509799753 |
| CES4  | 41.2424637338424 | 42.1372626664516 | 42.1901757067073 | 52.4212131710421 |
|       | 39.3667161654772 | 56.2229687620557 | 39.2533668167483 | 39.2672712041774 |
|       | 38.2874316439311 | 42.9866214102525 | 39.3086414047188 | 40.4639532172338 |
| CES7  | 37.9387791625384 | 44.9370339275041 | 41.8751578329365 | 48.856176220627  |
|       | 41.6806984441849 | 39.2248354955045 | 50.0088611244948 | 38.4540849632254 |
|       | 46.2027193115397 | 41.0057887014368 | 33.1645364749371 | 43.7672102682067 |
| CETN1 | 40.0557788909923 | 42.9020321355927 | 40.5386195997545 | 45.5869891570251 |
|       | 40.0599807618105 | 41.2567470068038 | 40.1235656101329 | 42.8482181313226 |
|       | 37.9837233601316 | 40.4136535208406 | 42.5023941254529 | 40.9149601380325 |
| CETN2 | 969.805093523651 | 698.595302020108 | 687.011162822211 | 513.109067557976 |
|       | 1541.9572099378  | 1245.45371155527 | 1144.34555072807 | 989.0602710707   |
|       | 670.023570141464 | 938.151864971251 | 810.382224368065 | 990.431472174705 |
| CETN3 | 59.3353474684952 | 73.3950348855139 | 67.9410473129639 | 74.4365426051588 |
|       | 60.1730663840476 | 71.2787833369055 | 60.726977722583  | 70.7087323885819 |
|       | 65.1911280716126 | 75.8280474316969 | 88.2314365506494 | 103.252085427319 |
| CETP  | 51.9545473262296 | 49.5443425465542 | 62.8131992098474 | 65.524821699432  |
|       | 51.4527545197672 | 51.0071565607171 | 41.5464765641928 | 48.7039705048129 |
|       | 45.1569741609597 | 48.9088046212958 | 49.319499137678  | 49.434568584642  |
| CFB   | 592.010988342149 | 139.758805241617 | 740.994425128952 | 400.506633704584 |
|       | 202.154195547644 | 229.035497774884 | 286.611037700479 | 158.493140172253 |
|       | 202.081933301612 | 155.225701588645 | 146.691463448295 | 224.320261187595 |
| CFC1  | 40.8681871019812 | 43.1805016690297 | 46.614092935749  | 47.8164193292842 |
|       | 42.0709558258414 | 39.7697110924474 | 45.4799270968969 | 42.4580504587581 |
|       | 43.7630587657205 | 44.3648993568405 | 40.4094901248527 | 44.293922970134  |
| CFC1B | 53.3967242431461 | 44.5152708955623 | 49.4573631027613 | 40.7481155008596 |
|       | 50.8875036861067 | 45.0882356578404 | 51.5967098638347 | 51.1694248620208 |
|       | 47.1744296124496 | 49.7259371799014 | 48.7502645382856 | 44.1452943804044 |
| CFD   | 223.669853276931 | 237.237762964658 | 227.170944398338 | 776.670493028756 |
|       | 264.161390133378 | 9060.10165509099 | 97.299696284253  | 256.721281849737 |
|       | 616.265771322835 | 3800.19142219719 | 4617.45430247751 | 3681.41904661708 |
| CFDP1 | 87.5146535320072 | 48.7847528954724 | 87.455991111513  | 46.4555908533915 |
|       | 54.802736966312  | 81.2314452281031 | 63.3924515518667 | 85.1544284060549 |
|       | 62.0272989884264 | 61.7502624458447 | 72.0389007415456 | 91.6328359149182 |
| CFH   | 86.0443764319119 | 84.8808332740321 | 179.285390561592 | 86.2488614616838 |
|       | 60.0736861987141 | 289.472303440614 | 46.6267962186599 | 66.1650385535549 |
|       | 196.623560874725 | 167.034910927177 | 156.884346540644 | 184.938142193035 |
| CFHR1 | 38.385865183581  | 41.9894412416874 | 41.2365089689635 | 37.29566077996   |
|       | 39.4693871570028 | 39.7394181011603 | 34.2773859804062 | 47.5950227477807 |
|       | 33.9456837661864 | 40.7063426028871 | 42.0750889188255 | 48.5123041297835 |
| CFHR2 | 42.8036731479932 | 39.5050383901884 | 44.2405728317107 | 43.9282059368202 |
|       | 50.3713170502557 | 46.1513019317765 | 38.0598374201407 | 48.7814131120945 |
|       | 46.3203995372658 | 45.9004543328976 | 43.9450023643394 | 46.5650556481721 |
| CFHR3 | 41.1523487516364 | 41.8534933577029 | 47.3861758958576 | 39.6833800000587 |
|       | 39.9088079891223 | 33.8357261052093 | 41.6466169548846 | 37.2738321651142 |
|       | 37.8631570409126 | 39.7411455670172 | 37.9946685306274 | 41.8200132437731 |
| CFHR4 | 39.0620487644635 | 42.1607322031054 | 42.7303139017786 | 37.0732977341185 |
|       | 37.5556299264699 | 42.157627240486  | 33.8558232866797 | 40.6171774724171 |
|       | 36.9060997041453 | 37.1275334308172 | 39.6403089864678 | 35.1451084093692 |

|        |                   |                  |                  |                  |
|--------|-------------------|------------------|------------------|------------------|
| CFHR5  | 42.3433931248155  | 38.8336427948187 | 32.8745892439217 | 33.1817617228171 |
|        | 34.9062568194127  | 34.5886782974123 | 38.1793598983615 | 36.0306975524309 |
|        | 37.9273653326866  | 31.7992509287736 | 34.5633623842083 | 35.6427313468066 |
| CFI    | 62.9952378379206  | 43.5873188565519 | 41.9666541498638 | 48.856176220627  |
|        | 45.2556760873335  | 44.6524308640784 | 43.6753843488695 | 39.1652965788406 |
|        | 76.7100878053735  | 40.1179210534118 | 48.8088340735921 | 73.1447139654971 |
| CFL1   | 1347.156644445545 | 1888.71160604243 | 1497.73669971925 | 1718.44944271916 |
|        | 1595.69503047506  | 1047.33749100342 | 2313.21212353993 | 2032.18819581205 |
|        | 1801.44003951248  | 894.486674059951 | 1080.43016747082 | 1040.102982885   |
| CFL2   | 41.3387790895716  | 43.1464706017434 | 41.3366779545815 | 45.2759158146116 |
|        | 39.6535880152834  | 62.4077024344427 | 39.7576136507593 | 40.6171774724171 |
|        | 41.1742244762318  | 43.5627649099623 | 48.042366934301  | 53.7442594289333 |
| CFLAR  | 199.404836798715  | 165.336029381509 | 286.497342437243 | 680.837950890159 |
|        | 132.172127966602  | 209.705575423447 | 153.901083585889 | 255.724996015069 |
|        | 83.5646728968172  | 278.773982275525 | 406.104588997462 | 325.769076169162 |
| CFP    | 41.8409927585705  | 46.0023068797812 | 40.1985790927248 | 103.961956810572 |
|        | 43.2484996523549  | 56.8505380943422 | 47.2927436772465 | 42.5435283762933 |
|        | 43.2761454096265  | 38.4187686307607 | 38.5668610487033 | 45.2783024981315 |
| CFTR   | 109.5145190042    | 44.2105195734073 | 41.2365089689635 | 39.3750969348308 |
|        | 36.2048942610546  | 45.2852528185486 | 43.0930293831497 | 39.5466975353131 |
|        | 36.3649677956953  | 39.9948390976317 | 39.7342718293432 | 40.9683275553869 |
| CGA    | 39.1590964332473  | 35.2143190355414 | 43.3085358214154 | 60.620259884953  |
|        | 41.6806984441849  | 40.5281496800812 | 36.5352572191451 | 36.7460922671619 |
|        | 40.6957787921451  | 34.1648535095605 | 36.131485826118  | 43.4709415392696 |
| CGB    | 48.6621527194963  | 50.543526404059  | 54.4384603094793 | 46.4555908533915 |
|        | 42.6022652963326  | 44.4619248757502 | 42.629412460409  | 49.5185112777773 |
|        | 49.7336769474446  | 47.611018474151  | 43.1931731665131 | 46.2625470410195 |
| CGB1   | 41.8833988894167  | 48.0010635382918 | 48.4890615340603 | 46.1074305700679 |
|        | 56.0477607422828  | 41.7256940298128 | 42.7065584433947 | 41.0844534776541 |
|        | 47.0055981216687  | 43.9783383422823 | 43.0016969050339 | 48.5123041297835 |
| CGB2   | 38.5648843914189  | 31.498275130159  | 40.4070046183108 | 38.6414316877471 |
|        | 44.147557390293   | 40.8634043028528 | 45.1017494688414 | 40.3357777530419 |
|        | 44.1519466943185  | 37.5343260962758 | 38.1835938174625 | 37.9607839934735 |
| CGB5   | 50.0802438185974  | 53.7332797903102 | 55.1547682957918 | 39.9084621723809 |
|        | 65.6003544901554  | 42.9104454767916 | 51.5229124652769 | 49.8666125578518 |
|        | 55.4030910454028  | 55.8510296341925 | 49.8783924642347 | 47.8431972374582 |
| CGB7   | 41.8409927585705  | 41.1212129940704 | 40.8420925848403 | 36.4564050256915 |
|        | 39.8198309498737  | 41.0012755104374 | 38.3346870469391 | 41.4061152929154 |
|        | 37.4937394063612  | 40.7063426028871 | 38.5252456306656 | 42.4229201717624 |
| CGB8   | 42.5193208629123  | 50.1027491117756 | 49.8344973836834 | 40.7481155008596 |
|        | 52.0583273941813  | 41.7627910693483 | 42.8684958525042 | 52.1788489555942 |
|        | 49.0986627051784  | 46.441301934328  | 40.1742127891824 | 39.9519547348106 |
| CGGBP1 | 154.067791946816  | 204.992039590717 | 246.274692971423 |                  |
|        | 265.930422462959  | 239.517996511065 | 223.397586938079 | 232.911951245618 |
|        | 226.023657887826  | 223.168185178205 | 196.267504470029 | 196.465477936749 |
|        | 252.583117397109  |                  |                  |                  |
| CGI-96 | 60.8357760968871  | 65.0567596131122 | 62.6074601128958 |                  |
|        | 44.3440839686558  | 58.7065473526185 | 74.0995052892511 | 71.193768715137  |
|        | 63.5693267269002  | 59.9770720847728 | 42.8936990772838 | 49.2879849674517 |
|        | 47.4699236780425  |                  |                  |                  |
| CGN    | 258.726193861248  | 422.702925141293 | 798.996494242432 | 45.334106390212  |
|        | 647.868022835702  | 91.640286556353  | 450.271658272512 | 1638.16317738035 |
|        | 402.978328664331  | 734.424771383522 | 638.305455110267 | 430.868309653765 |

CGNL1 190.675425748381 62.6984594468418 92.0880591999243 99.5958921252583  
47.0954207417646 1000.65752290829 63.5738862549306 212.00247895282  
39.0775870687758 373.714692628967 260.618790701505 234.043251639296  
CGREF1 37.9387791625384 42.2577689927563 42.5406888281114  
44.265834798964 53.5594683028749 46.1513019317765 36.5352572191451  
47.4740726032707 39.0775870687758 37.8217989841918 37.7384958256497  
40.1700117452801  
CGRRF1 87.5146535320072 93.8009890556664 90.209585044076  
116.295564219236 64.7488184936482 155.693953208351 70.8835636550472  
85.9474373829081 110.219274023648 90.9570747667407 83.5895816521251  
127.811684080184  
CH25H 85.5362566454799 109.844156801015 66.0411740221276 268.121244731705  
131.766252431636 722.514380928291 77.0003455479124 133.453860783605  
43.1805016690297 67.0163226819964 60.8662233098324 58.0218262176065  
CHAC1 43.6706764143908 45.8669209716694 40.1985790927248 48.309866878365  
45.1137938810047 43.7630587657205 41.0381860307445 44.7044140979108  
46.2027193115397 41.9666541498638 41.0050831223107 43.2776458914333  
CHAC2 33.3307770183871 40.148780650831 47.7737810047679 41.8778873678551  
45.1137938810047 39.0266821712099 41.3594868055879 38.745552403895  
42.357910063876 39.7835513496873 37.0180934800573 41.1554481567603  
CHAD 40.3478825593224 42.3550738181144 38.0452862258803 39.1706564265495  
40.6723334103791 43.3785777889265 45.223075311113 41.5464765641928  
44.5303781239209 42.0621425894624 41.2598458726002 44.2527566343661  
CHAF1A 57.50915811428 68.4278345554565 50.6004078448405  
65.084620579901 87.3957386451235 42.6575535390785 99.5844079573552  
79.7170181855209 79.4528447794527 52.6879797806876 50.0303076717704  
49.2064066614865  
CHAF1B 58.1027665533767 64.4837166864084 49.4573631027613  
43.3078542962968 92.0958762013613 47.6803619768589 106.486195938039  
66.0303950772736 73.6965494979349 47.3791873993182 45.9104478407175  
46.8129509799753  
CHAT 44.8914371498528 44.2105195734073 41.0356368374708 43.4410741327254  
42.9655396732962 43.0038142244237 44.6809101024392 42.1860813954352  
43.3118137410238 44.0527419856743 43.9975207836855 45.3763275588341  
CHCHD1 103.458867136383 85.1207977556852 81.0295607064541  
88.9113618165337 132.400225103653 86.3888090084564 98.403191200835  
77.2048580540589 218.165286111397 63.3872214856708 61.2529834995512  
95.491982090349  
CHCHD10 625.620497724795 1035.67547271468 1393.24135330226  
690.568858101531 1423.29307392266 1099.52344340557 787.671342652389  
917.179747195874 1466.88103496067 1214.73798692268 1771.43541011426  
977.776395810338  
CHCHD2 2294.75523373329 1907.47560253019 2621.65272077828  
1411.12613289991 1956.75875151802 2474.22199172028 1749.06320703181  
1752.11152588494 2323.81110653289 2067.66516256598 2440.77408185413  
1634.61795848352  
CHCHD3 92.7427427543974 70.7702047405718 62.9967097752591  
83.5895816521251 112.506613718654 101.46584765758 97.299696284253  
74.0831311663524 102.063594231253 69.5080454202415 66.1229691315616  
99.9685666586407  
CHCHD4 215.15351875081 202.494545985006 138.81810375553  
137.335224748204 285.322305931794 207.726011653345 277.665554240228  
508.474794786176 174.021676013865 183.799353414581 184.105396912056  
194.862177434028

CHCHD5 190.570409327756 276.214079735778 386.787221140343  
 255.636379050741 220.79051545138 201.163076338483 259.127235335036  
 136.913434348036 394.437597863822 361.861166927682 282.196234758364  
 297.475572902965  
 CHCHD6 130.985178898633 94.9831937714438 96.3741876853801  
 162.151812425949 225.827961496781 143.679866958604 147.945429978177  
 112.328675926999 134.749803376372 106.049736669661 121.084398596738  
 119.124583755587  
 CHCHD7 88.5638310461364 119.088986733238 85.5839487225537  
 62.6048727240291 123.729687262037 135.29225447532 78.9203273221608  
 53.6782125131958 93.2557602398938 96.6027330566908 89.0684909049451  
 100.883604376864  
 CHCHD8 71.5484567134601 71.1595608255838 77.9085946827079  
 73.7124988616836 122.0305509548 80.2112932898502 110.589130460258  
 75.0377156190383 85.5095013644374 57.0581769379589 59.1443775199516  
 91.9534828522538  
 CHCHD9 915.102542160713 917.631567606105 581.706970365754  
 678.996864855592 654.682263833024 568.371815312895 746.252816568691  
 710.831173303701 886.397061577531 418.693470287372 412.421643885499  
 511.792908607692  
 CHD1 153.310447977094 111.72494102259 104.037949992458 291.021345839327  
 125.424626287985 154.355197155161 138.349952332963 143.952224627989  
 123.077231445204 164.580141651883 113.322929203297 165.797721197832  
 CHD1L 115.894467332637 83.5274372175811 105.726287089142 100.483113678344  
 105.187381311145 95.2367177680328 98.5663841503803 131.67159377585  
 88.0055507173538 92.804679821289 86.8330533522204 92.9600461444587  
 CHD2 53.4921736109774 53.9275079525238 46.5113110023498 58.3475983630509  
 59.9326265577462 56.9320717885002 62.4317959077388 67.8061298261394  
 70.178974380507 49.8393069675192 47.299647867533 62.1718158914638  
 CHD3 45.8574226904273 44.3977035913759 44.5544727111028 54.1952533541951  
 47.3791873993182 40.9506062495231 47.3661873039785 50.2391482329046  
 43.2163597439147 49.2317401696588 50.3672856609022 50.0571060701893  
 CHD4 688.612748336336 447.709872889701 592.010988342149 500.168833003599  
 518.074074000609 580.109585240053 706.087945508248 670.958499409833  
 871.238169066998 640.944514118411 657.59007878546 319.502295093307  
 CHD5 41.1523487516364 42.2577689927563 44.9758339877851 35.1451084093692  
 43.3332476888305 42.157627240486 40.2154497375715 46.0633179231318  
 37.6383530120621 43.1839109702714 56.4567728276775 50.5511827666954  
 CHD6 50.0466349801009 56.6617674371349 55.3275365686503 45.5869891570251  
 42.8510579683751 52.1408852421186 68.8005532048281 64.4801713556664  
 56.432280646473 70.2565873027242 63.2684764441521 59.0894921452893  
 CHD7 324.936044300546 210.255784687052 140.992072231913 166.064317271991  
 306.294404016622 102.980622026276 198.729330487352 178.249889756228  
 214.774035015293 182.37433006793 173.328468320432 159.827302305842  
 CHD8 522.49156295512 204.903470332387 243.549194928524 206.28819203182  
 193.897678586782 194.536619596804 228.907776306695 320.504100222566  
 160.425627898607 316.745819100367 411.857557412386 270.487135967976  
 CHD9 289.213144287085 292.389429869034 379.933650669101 350.917244438732  
 135.829530518199 351.700618429121 306.578554914328 483.313014703768  
 386.170232791927 1005.45493369789 671.959673037066 545.514314651238  
 CHDH 37.3463875295726 39.6123051184545 33.1559412791294 44.265834798964  
 43.2484996523549 37.9951997351435 46.7100796279384 33.6816578730693  
 43.3744503319109 36.1550293353654 36.131485826118 39.0536056496869



|        |                  |                  |                  |                  |
|--------|------------------|------------------|------------------|------------------|
| CHEK1  | 102.25509551881  | 114.965999573704 | 74.6901522573522 | 71.3932787152381 |
|        | 243.489225650886 | 72.4651758215622 | 252.487015579489 | 156.844010597219 |
|        | 151.047739254277 | 44.1379638573455 | 49.1067959632109 | 56.9379721393904 |
| CHEK2  | 75.9099205260748 | 92.3307175266839 | 80.943990104641  | 65.3843877368233 |
|        | 112.919063481867 | 67.9778438150245 | 109.811921160228 | 70.5992463788381 |
|        | 118.288549974348 | 61.5236837309467 | 59.4465684293847 | 75.4935574755043 |
| CHERP  | 82.5344501505114 | 94.1289383735162 | 82.6983700200815 | 71.1583251698218 |
|        | 123.978615472736 | 80.5478617156852 | 111.714563124738 | 86.3237770387663 |
|        | 113.026772174726 | 98.9657264176664 | 96.4278951689874 | 76.2533853403813 |
| CHES1  | 261.653821192385 | 106.160416826673 | 122.405413080836 | 332.137622104526 |
|        | 130.184962393833 | 583.915973546284 | 122.720768249799 | 127.961989181945 |
|        | 236.565670642447 | 438.50123471613  | 555.356799014777 | 601.139894733857 |
| CHFR   | 596.84269596976  | 488.089090043145 | 452.883337614277 | 561.855286945959 |
|        | 295.127975044241 | 281.774690337889 | 452.139416552986 | 150.985239447761 |
|        | 432.669787408904 | 373.172504097546 | 438.681666410245 | 258.589426470951 |
| CHGA   | 39.1590964332473 | 46.2286164776607 | 42.8270038153139 | 42.0102671859606 |
|        | 44.7829632472754 | 41.6590564937735 | 45.7452456977857 | 43.1567024035183 |
|        | 40.8970401536578 | 43.0919221375514 | 37.2892641289258 | 41.7575097298927 |
| CHGB   | 32.821392987958  | 38.0226905622357 | 39.8299340037009 | 40.646702696033  |
|        | 36.3390947880186 | 42.0574848021044 | 41.706879587091  | 40.5158867964016 |
|        | 38.9834959368496 | 41.0057887014368 | 37.9230440150891 | 36.3454320848591 |
| CHI3L1 | 39.266565827316  | 45.0905928998779 | 46.3411353377615 |                  |
|        | 49.9014504704021 | 37.0526522140242 | 38.3418933808844 | 43.8206425661746 |
|        | 49.3880946790306 | 37.4540772310118 | 48.1392888470269 | 45.2265319826548 |
|        | 41.2437378488025 |                  |                  |                  |
| CHI3L2 | 54.7786516309154 | 44.5152708955623 | 47.0055981216687 |                  |
|        | 165.311139930529 | 45.9104478407175 | 55.1547682957918 | 44.6809101024392 |
|        | 51.2623287419357 | 44.9645354363967 | 46.0713306971594 | 44.9081227425497 |
|        | 46.4499258373233 |                  |                  |                  |
| CHIA   | 38.9271399577966 | 40.2493681589104 | 45.2313723727673 | 39.6705473876526 |
|        | 43.004943518025  | 42.2577689927563 | 40.0052661202207 | 40.8833572570383 |
|        | 39.1790517315259 | 42.5664883002833 | 38.6662194645633 | 39.3575468494941 |
| CHIC1  | 40.9558083259517 | 43.3972849968032 | 37.9482157381008 | 50.9493788151501 |
|        | 43.004943518025  | 43.2805590023412 | 40.5585676679482 | 45.8176925260962 |
|        | 42.9413736814915 | 42.9358255168086 | 46.9246510824681 | 45.9104478407175 |
| CHIC2  | 294.443061798191 | 379.933650669101 | 203.82788889213  | 524.451156145427 |
|        | 339.601844139729 | 338.053116855608 | 286.611037700479 | 277.014526407597 |
|        | 365.792144095604 | 244.736442646499 | 250.210134743225 | 311.668075784386 |
| CHID1  | 42.8036731479932 | 39.6123051184545 | 36.4564050256915 | 40.1804147506786 |
|        | 37.6527901109005 | 39.9397419279057 | 40.0052661202207 | 43.844855336215  |
|        | 39.9444191873552 | 42.1622837416589 | 34.064698871541  | 40.0557788909923 |
| CHKA   | 79.6133633483649 | 53.2398469202731 | 72.9051985681184 | 79.8701900696361 |
|        | 93.7260389087192 | 65.0774755750423 | 83.1614238528477 | 75.5510570035251 |
|        | 113.905373770586 | 118.651855622915 | 100.535211780514 | 99.6695996119465 |
| CHKB   | 142.957149812186 | 148.016994658777 | 301.941928552396 | 157.830518171698 |
|        | 148.817606651444 | 107.91849682084  | 82.3328061091245 | 101.197890058764 |
|        | 88.0877175295544 | 247.298165265093 | 188.943404504867 | 157.133627517432 |
| CHL1   | 41.7835997867848 | 37.5469247328848 | 42.1901757067073 | 35.6027791404152 |
|        | 39.7162631015511 | 39.266565827316  | 41.9918605927928 | 40.6723334103791 |
|        | 38.0213051227859 | 40.5090849993014 | 36.9768361759916 | 41.5132248356707 |
| CHM    | 73.3270037834227 | 93.461049073831  | 93.5717680539357 | 121.510087314197 |
|        | 71.193768715137  | 101.516595046503 | 97.4515987591398 | 88.3335649692467 |
|        | 90.0420794458477 | 117.586275152761 | 103.423003544792 | 105.197692490363 |

CHML 50.0466349801009 48.3699741879723 49.8344973836834 67.8978240198575  
59.6922302604696 54.3478800757394 55.2088411137193 62.2982003555312  
56.432280646473 55.7930787690756 47.299647867533 54.9919060580109  
CHMP1A 332.659496278775 273.032063533642 316.831358204198  
190.242383482058 194.703024752864 184.989940464859 451.364230598722  
236.759651096748 286.538414026118 380.736562250846 362.615047009897  
251.4927207704  
CHMP1B 459.546279672649 724.881002237334 470.676006277762  
845.41973083225 524.972936438175 370.917477324773 753.491584605447  
931.401929277001 413.990148966099 207.600413958886 317.669452297159  
428.958127252533  
CHMP2A 138.151998239414 182.091945578277 266.439343650315  
302.50850157207 184.048982286364 242.673166257518 193.897678586782  
215.175765091556 300.762511215441 184.859183550225 198.15553991394  
250.176074707634  
CHMP2B 171.021755568144 300.560071753181 222.957344929381  
244.837105178705 271.50380898418 306.14500148663 308.841311505431  
216.194306146777 264.659866487253 127.567860003773 148.781721594419  
310.900527198512  
CHMP4A 348.450810225807 125.027865666372 203.373397813051  
207.741669973713 158.17598244564 216.526205739151 170.87055409699  
239.070294068861 210.524799041662 281.016474354764 263.330471155421  
289.533968432846  
CHMP4B 395.634889855838 367.158502379417 323.002018912848  
387.867128019374 341.535750991033 702.737741114234 555.727708387209  
411.431488342465 515.007705025879 512.951288394692 605.338871441599  
522.651572868385  
CHMP4C 55.3153799233744 90.791818798144 50.2869791217819  
35.2143190355414 40.9950639693255 35.6125439901743 44.3440839686558  
45.5581356216957 54.8946088631931 56.3441077510744 58.7389869173495  
67.9141812398066  
CHMP5 212.822978676596 214.537530518962 164.847648206552 189.137593177772  
177.82359682336 209.31241212773 179.158053533144 184.269633116351  
130.65627609817 99.7807691901691 113.726153436343 288.923207993626  
CHMP6 75.2923395421694 100.370937669662 85.0342118119783 95.5022104475922  
62.1836961153924 87.7460859694899 108.263706890599 76.2258667419953  
124.815448107572 100.975810139572 99.3142021810133 67.9850517608624  
CHMP7 62.5528124447176 52.1062000766427 55.094385444315 65.3191216270241  
46.8674366115656 68.839885767937 59.6780848951767 50.0526763693329  
62.5542376788358 70.4895190282848 75.4732674021193 60.7495043977707  
CHN1 179.522572239758 89.7554896946341 100.708709225818 160.425627898607  
89.6313467455698 68.4906691348625 78.9900928241723 133.893108529325  
48.4869909888679 76.2533853403813 119.747995520476 57.0082102559228  
CHN2 47.7267190613906 57.2871072823547 42.1204847421254 66.7106881373359  
54.3736840324687 83.5274372175811 98.8657527308305 97.1634390603131  
90.0157406552551 91.4990733687068 76.7806009547111 65.854213724711  
CHODL 59.5000730792772 45.5842286511645 43.7630587657205 42.6913548400127  
44.6834648302383 54.3478800757394 46.0228732507872 52.9813204449021  
66.0350709576651 61.7502624458447 58.3586374083245 51.8562635270111  
CHORDC1 55.2182004838121 57.0575084219334 46.1312573416873  
47.5733603903505 56.359578588344 53.63657997649 63.928488869459  
64.3669451425581 62.8635815439291 43.6033221838149 54.8532558909227  
60.7985356140269

CHP 167.578081645481 160.425627898607 104.704892803169 132.760054781304  
 167.824386984618 97.152024864444 149.076166432567 188.789206373516  
 167.198128794195 114.321083441061 128.070047614488 171.360248172138  
 CHP2 40.3478825593224 42.1607322031054 146.087016079575 42.2496337895968  
 43.9450023643394 40.1428591998404 44.2166118829877 46.1673159982664  
 92.8206287414481 142.731630650904 109.076358658606 148.570371099987  
 CHPF 621.980260052085 154.869301720717 159.046483157634 203.759116151774  
 216.821078573868 162.932479392087 147.010700944686 279.125471103327  
 161.439879456216 227.535855856645 201.657389063895 164.642060754649  
 CHPT1 78.1313732870053 249.101015988111 150.387474375456 128.157032116902  
 95.042308285667 222.126944340681 74.9059650336395 100.616027485975  
 128.230543301378 91.3418781023824 144.868987794412 142.124053129543  
 CHR415SYT 38.6454098044474 38.3322849790657 43.401782064778  
 56.7927450229377 40.2449343247539 37.4782441311626 41.0381860307445  
 38.745552403895 43.4656637536244 41.7405682794166 41.9908237694988  
 39.2469742642337  
 CHRAC1 91.6253858792439 94.2182728193924 66.5285423077808  
 70.0402992940342 78.7320333941149 99.2749350936362 63.928488869459  
 63.61404854326 81.6508259258669 77.4999637278723 80.6550905475507  
 64.863894209343  
 CHRD 71.4276813927272 43.3458769998118 44.3344900481112 57.0629653735694  
 46.4343327861696 62.843734579668 43.6753843488695 37.6557714476853  
 41.7627910693483 45.1569741609597 49.9338905397767 38.9496515344837  
 CHRDL1 40.9558083259517 39.2907645923217 42.3887531663733  
 42.6913548400127 39.1650142708257 54.2978574294868 35.8227939208521  
 41.5934628038429 38.3418933808844 40.6533975461148 45.9938357766653  
 42.828737648529  
 CHRDL2 52.6960621424156 53.0383634135393 40.4882741869718  
 86.3663084195994 37.8679241954337 80.5478617156852 42.2577689927563  
 44.4031868028216 38.6322728994674 44.3648993568405 40.4504608195666  
 62.58750768974  
 CHR FAM7A 43.8674747059508 40.7623977968067 38.7745734037492  
 41.1531238436707 37.956732373465 39.8455060654531 38.5519892723521  
 39.5893773029164 43.3744503319109 39.3866822630357 41.8645741488184  
 42.4147793282701  
 CHRM1 35.6111578834671 35.4484652445078 38.6727842796202 40.4359177791566  
 35.9058393060637 32.771863438151 37.1643693306382 33.9687743313429  
 36.2733735494625 41.9666541498638 36.2435874904689 43.3744503319109  
 CHRM2 40.7609952437622 39.3688265853724 38.2593044488288 42.7628396725929  
 42.8510579683751 41.554942319225 39.2730372355057 41.6466169548846  
 38.2874316439311 40.1508555768978 42.59352468383 42.1957516560122  
 CHRM4 43.5710871617107 40.2493681589104 41.528370959196 40.0698728584484  
 38.745552403895 40.244271403831 40.1235656101329 40.7311497914871  
 44.8003345643334 36.6893251782922 38.8507804383261 47.7962548556026  
 CHRM5 41.3387790895716 36.89524015739 39.0775870687758 45.7397504535169  
 38.9496515344837 38.5252456306656 43.6753843488695 37.33030683349  
 39.3750969348308 41.5435611403119 38.745552403895 35.8429598823818  
 CHRNA1 69.7908294064179 46.0364000143537 39.991353369336  
 51.6974465478564 43.2869475999748 38.9378717994178 40.1572444265517  
 46.2231598401576 39.8022382792104 39.0325254636537 37.7882601416133  
 39.5806465938526  
 CHRNA10 40.7609952437622 51.9421032049606 40.6737160001291  
 49.3654837541353 36.08956004634 44.7804080899431 38.6243997507646

39.0620487644635 39.9444191873552 44.4652605017595 38.8507804383261  
36.1647506311964  
CHRNA2 45.4799270968969 39.0102066700839 40.6737160001291  
40.7481155008596 39.3667161654772 36.2768299545794 37.2892641289258  
40.5158867964016 43.3744503319109 42.5664883002833 38.3684202018524  
40.2669497398702  
CHRNA3 46.8141313516997 43.2649781354792 44.0451487108213  
47.27543600687 42.5449473689701 37.5469247328848 46.1634822993009  
40.9861485852278 48.9540527545343 42.3413611855132 41.5685493982342  
42.6758568421347  
CHRNA4 45.0985088502363 44.2105195734073 47.0055981216687  
36.7892997857376 45.8051846088552 40.5281496800812 47.7390230243778  
43.6434576713809 38.2215591930186 43.4885245598939 44.3763859390287  
45.4799270968969  
CHRNA5 1083.50383916482 530.314249832491 734.705859548078  
728.257836227637 486.757854744053 401.202348352506 991.630429625437  
1320.7894611262 501.585246203512 1450.53108586858 1411.12613289991  
900.517711546397  
CHRNA6 45.0985088502363 45.7979032939211 46.6588655218735  
54.6089451252049 46.3150221024046 49.8472708021525 44.7255207589606  
52.7787010032051 45.9227107476843 51.9547984751408 47.2134341420411  
41.5536168238478  
CHRNA7 42.8036731479932 42.1607322031054 44.3344900481112  
42.1273928203021 41.9842695818285 46.263826584899 43.9450023643394  
44.797320243931 52.5772854102326 41.5435611403119 39.7342718293432  
43.8575940017119  
CHRNA9 37.5887129572848 40.3104838541906 39.4250105372135  
44.3440839686558 39.3667161654772 40.7616966228404 42.357910063876  
40.7311497914871 40.4518431978241 37.0740019672788 37.9230440150891  
38.9834959368496  
CHRNB1 79.2665546280232 69.4820178305563 85.3718124658316  
65.7321440516177 68.4323624797175 71.6050174762551 82.5050369860039  
63.7002949745101 64.1267046511632 75.7801512652102 70.6138659908885  
82.3254961129575  
CHRNB2 36.4564050256915 33.5924201549249 33.6816578730693  
42.4580504587581 37.8679241954337 39.6251842352088 35.9894133432376  
36.43924066428 36.0741672064298 37.7315666632629 35.3362091871364  
37.9607839934735  
CHRNB3 38.957687788868 38.1312950900467 38.4043916290561  
36.1562979552173 41.9842695818285 44.1737502492846 46.8613212048981  
36.1375121409002 34.8552366193358 34.4875013487777 41.7272875295469  
36.064718696392  
CHRN D 43.844855336215 45.1694246393676 46.5650556481721 36.0481934423077  
38.5512429290626 38.5252456306656 36.8369172900902 40.831207953647  
40.4997186069494 37.1275334308172 37.7384958256497 40.1700117452801  
CHRNE 40.9558083259517 41.7337506166619 48.8941062980393 40.3180310664156  
45.8051846088552 43.5752393599169 48.3411413510851 47.5950227477807  
42.992884918158 47.3791873993182 48.042366934301 40.3691324547049  
CHRNG 39.7576136507593 36.2103905554984 40.301483914446 42.0102671859606  
44.8897737954573 39.9397419279057 39.5496902678788 41.1575777497576  
43.2761454096265 44.7958122466628 43.4709415392696 51.5741598315033  
CHST1 54.4384603094793 42.4493032770053 56.0477607422828 59.987045425047  
50.3713170502557 40.040778349137 40.6750540874299 38.956280281655  
53.2046867327331 45.0155543555707 50.8826620053386 45.7562276914441

CHST10 63.1291723738553 52.8796369426118 47.0055981216687  
66.5921967967793 105.018199901228 76.4439037944547 85.0342118119783  
96.8945937999801 68.4229528414965 93.3216420803293 88.2314365506494  
55.8775622338124

CHST11 35.6111578834671 36.5219488315447 32.5052327840481  
35.7674462337723 37.5556299264699 36.1190722948669 35.7055410599146  
38.2782436497441 36.0741672064298 39.2623423164488 35.7953070087288  
36.9976231206067

CHST12 186.64040927334 93.2630594602634 97.6663462144457  
124.350816245276 136.272019225585 91.2681347227088 88.5907320965949  
88.4439480366515 119.947688643528 187.923050034941 152.031470139119  
127.093495914275

CHST13 47.8249696958403 60.1102859845739 46.3411353377615  
80.5537984388921 78.7320333941149 56.6172748471831 43.3262148375525  
51.1694248620208 37.7384958256497 43.2988017098387 45.4799270968969  
36.5474283500601

CHST14 127.352997770688 149.494335028498 100.305262467668  
96.2385885003071 110.729504563799 103.734064904898 127.418173390084  
96.213791081731 165.598854278557 221.450737998571 160.360785581153  
127.567860003773

CHST2 41.3387790895716 52.7493349111555 41.3366779545815 37.4223289687135  
37.7576900881741 47.9503724044453 38.2933870238743 45.2806199505029  
43.8482802038826 49.5265949137207 43.0016969050339 45.7562276914441

CHST3 215.033807819308 75.2824161164996 88.2959958615748 90.696780047049  
75.6471706262645 107.60291670075 73.4820932957859 108.700838142885  
78.6048653630165 121.806692423791 81.7500436717038 100.423344358771

CHST4 108.558977253184 42.8542642792862 40.4882741869718 37.0732977341185  
35.1411239266238 36.2768299545794 40.2154497375715 36.2539950294089  
39.6609238036815 40.2112371512838 40.6373400186325 36.449101775775

CHST5 38.9229928131225 36.3110701990588 45.9227107476843 40.1804147506786  
40.7779767565889 43.1180113655693 38.977631784251 40.4359177791566  
44.9645354363967 36.0481934423077 42.4580504587581 38.0452862258803

CHST6 61.6544855697851 42.0709558258414 42.3536549114165 52.5307002738469  
39.9697332660833 42.2577689927563 55.695361644141 44.293922970134  
47.9035532886869 44.8997235283254 43.401782064778 51.0013344286851

CHST7 118.358996104366 107.513442725922 101.403739410832 374.978401470437  
99.6821042055758 276.666571115104 130.72385089567 72.7596094170237  
92.4839055864605 146.691463448295 110.440072569721 106.20479137406

CHST8 38.8561375693335 41.554942319225 41.528370959196 40.8681871019812  
40.6723334103791 44.3648993568405 38.0598374201407 55.6904617926772  
48.2123120250343 38.3092241935352 36.8282383070068 35.0222940937513

CHST9 38.304249186058 34.2618170189676 36.3604951341921 32.7960913111995  
42.7982502551634 43.4681646416585 39.2533668167483 40.2382908228517  
40.9901805728485 44.2580151149956 45.7328341667151 49.7336769474446

CHSY1 595.790464730847 231.637751095711 208.804071011518 491.8684831079  
391.658764737446 311.432395849636 347.145902252055 443.863346367342  
235.294634126766 345.876877384089 289.780414673585 306.578554914328

CHSY3 106.356074933606 48.2220547806679 54.9071823326024 61.3747706295648  
51.940083408061 57.1752846228778 42.8684958525042 55.3122077514658  
55.5086026637973 55.9283039581662 71.751972433516 48.7814131120945

CHTF18 117.439175394651 107.654589391726 100.645556491457  
51.949834638817 161.180847265279 63.5738862549306 132.090336898032  
80.9092480872499 116.576093937704 70.4895190282848 70.8670844767965  
60.0940570991178

|           |                   |                  |                  |                  |
|-----------|-------------------|------------------|------------------|------------------|
| CHUK      | 94.8260360398356  | 128.146059846414 | 131.717764850211 | 234.308728996238 |
|           | 135.41852974791   | 139.554519110944 | 135.012695962236 | 117.488737569957 |
|           | 117.893268074013  | 82.0149542477384 | 107.646103699516 | 142.812241748319 |
| CHURC1    | 108.649424858333  | 107.951009163316 | 152.920586451578 |                  |
|           | 228.809697062726  | 488.908231529696 | 407.336051853854 | 97.0155195562193 |
|           | 80.8333046859586  | 415.251775687794 | 336.44013572926  | 375.697071471585 |
|           | 192.216758313982  |                  |                  |                  |
| CHX10     | 34.2180669723984  | 40.3384318592985 | 40.0998167098057 | 36.7892997857376 |
|           | 40.8873907150245  | 38.5252456306656 | 42.357910063876  | 38.8495095797881 |
|           | 35.860430241131   | 38.957687788868  | 37.2018803984555 | 40.6614700944853 |
| CIAO1     | 317.892699374852  | 371.709014310561 | 265.414737742846 | 263.125290391542 |
|           | 277.588692595406  | 287.247399926139 | 258.446095955014 | 272.663785805238 |
|           | 315.276749671783  | 361.023743912857 | 359.241360412129 | 348.65230953701  |
| CIAPIN1   | 104.832753086298  | 101.523741547876 | 99.2504397421242 |                  |
|           | 72.6824533717231  | 58.7460488758053 | 70.8674195845729 | 83.0647477737971 |
|           | 66.9340967279385  | 142.748812565309 | 72.2443746456494 | 69.6097529955737 |
|           | 89.9460400399039  |                  |                  |                  |
| CIB1      | 4752.94498024732  | 3021.24285327836 | 2513.15722262176 | 2448.64580552439 |
|           | 1718.44944271916  | 1384.80615431656 | 2771.14077845128 | 3800.19142219719 |
|           | 3905.8371644287   | 2313.21212353993 | 2405.8635632802  | 2091.0611913538  |
| CIB2      | 63.7818442618767  | 52.683711208052  | 43.0971787292711 | 48.309866878365  |
|           | 61.6452971581503  | 47.7556758818053 | 75.287377665837  | 48.6441988290952 |
|           | 58.6431245059655  | 49.7259371799014 | 60.4620008899889 | 54.5921287593554 |
| CIB3      | 35.0202257459026  | 43.683792219729  | 41.0356368374708 | 42.357910063876  |
|           | 41.7929491793697  | 42.9695585740813 | 41.1507980856436 | 46.2779564481158 |
|           | 42.992884918158   | 42.9866214102525 | 45.2265319826548 | 44.4475838947656 |
| CIB4      | 34.6977013306396  | 39.6995529770239 | 32.5052327840481 | 34.9221408381038 |
|           | 46.6397391251762  | 40.7616966228404 | 34.9344532055397 | 41.9315419791594 |
|           | 38.7298222155532  | 37.6383530120621 | 38.1835938174625 | 35.9604262434141 |
| CIC       | 113.444217634165  | 74.0614295574729 | 82.6983700200815 | 84.6435656850129 |
|           | 101.277664841914  | 99.1667512831715 | 88.5907320965949 | 102.49785018292  |
|           | 85.2598847559951  | 77.6056319020116 | 98.1495112518979 | 84.8808332740321 |
| CICE      | 108.251353392321  | 117.389308836013 | 147.557451530784 | 141.206849814363 |
|           | 136.806769571262  | 153.515845356859 | 127.49459343016  | 116.434267173815 |
|           | 117.072965367702  | 79.4158467034017 | 90.6191520659197 | 131.57403028894  |
| CICK0721Q | 145.3872406432794 | 46.4861258030402 | 42.640829914102  |                  |
|           | 41.5464765641928  | 41.2740822675592 | 48.5835484742456 | 46.9929836306816 |
|           | 41.4508241771315  | 45.0997987980157 | 48.7414853386615 | 46.1673159982664 |
|           | 48.4535991392809  |                  |                  |                  |
| CIDEA     | 36.1831439734485  | 42.8971749680871 | 48.3609527732104 | 37.1317006162938 |
|           | 44.3292391134969  | 46.0364000143537 | 38.0598374201407 | 37.830876898596  |
|           | 49.0655215909632  | 56.4553747079294 | 43.0016969050339 | 49.3731715216836 |
| CIDEB     | 50.0466349801009  | 74.6847594297153 | 76.1493261430901 | 102.971363152434 |
|           | 48.6224651100733  | 65.813547096222  | 75.164719839017  | 41.8417024632349 |
|           | 37.10170285405    | 51.0055825931636 | 52.1788489555942 | 67.9850517608624 |
| CIDEC     | 43.7920955808549  | 39.5050383901884 | 40.1985790927248 | 37.5764485234171 |
|           | 40.4639532172338  | 103.063302515808 | 39.7576136507593 | 42.6450179841129 |
|           | 44.0519245668737  | 45.9426591985894 | 40.8681871019812 | 54.2677073532779 |
| CIDIECP   | 48.9906383294199  | 47.8400694856726 | 44.8872784170036 |                  |
|           | 38.6414316877471  | 47.5647821785529 | 51.9421032049606 | 42.4939802311136 |
|           | 51.0724630072723  | 45.3756389170606 | 41.6373771565199 | 46.7386599624801 |
|           | 44.1452943804044  |                  |                  |                  |

|        |                  |                  |                  |                  |
|--------|------------------|------------------|------------------|------------------|
| CIITA  | 36.4564050256915 | 45.9266745571724 | 39.6451483836089 | 54.6089451252049 |
|        | 33.143488395779  | 43.8582747295766 | 30.3554137634399 | 45.2806199505029 |
|        | 44.1519466943185 | 39.2623423164488 | 37.1059647239814 | 40.6614700944853 |
| CILP   | 271.601892365742 | 41.8848959280916 | 42.3887531663733 | 44.265834798964  |
|        | 43.1252272136667 | 878.863554510943 | 37.3508690072156 | 46.6384636367629 |
|        | 41.1742244762318 | 426.622204035624 | 268.072653271299 | 347.003621791919 |
| CILP2  | 51.413025495745  | 36.5219488315447 | 40.7620472083159 | 36.264823544143  |
|        | 51.6869155634183 | 38.8336427948187 | 35.1307934330047 | 52.407151732257  |
|        | 39.0775870687758 | 44.3648993568405 | 35.6041926503637 | 42.9887069977696 |
| CINP   | 66.0303950772736 | 45.0115870036541 | 68.8098607236981 | 64.2130157241811 |
|        | 50.5110359971301 | 54.1440452292081 | 51.0013344286851 | 56.4779645313958 |
|        | 63.6222532132037 | 49.6203214143464 | 50.8826620053386 | 54.720204938924  |
| CIP29  | 675.832363405287 | 511.067537752967 | 443.863346367342 | 692.630044242985 |
|        | 475.466074293565 | 585.054570630252 | 768.354209323884 | 1208.33498233518 |
|        | 827.365231733511 | 755.106456358949 | 628.84789420227  | 809.577874019028 |
| CIR    | 68.9745034946434 | 65.9098543816057 | 59.5444359507702 | 102.365615739399 |
|        | 48.8381507187986 | 65.4643755537228 | 52.0942589368478 | 64.4156641487994 |
|        | 65.564930068976  | 59.9354531144375 | 63.2684764441521 | 68.7753456118815 |
| CIRBP  | 805.590413262364 | 1566.12726152736 | 1891.37245670852 | 784.268074988084 |
|        | 1723.37649434054 | 2498.54878472152 | 814.991871217268 | 1046.42391243532 |
|        | 1081.97502255142 | 1693.5377672895  | 2067.66516256598 | 751.150916058018 |
| CIRH1A | 340.105993325165 | 374.427492246826 | 529.430648638878 |                  |
|        | 239.792011765323 | 431.864508795316 | 382.538365722661 | 519.775555680262 |
|        | 446.162602155964 | 389.686780706341 | 444.937258895152 | 366.615979176657 |
|        | 358.402309513947 |                  |                  |                  |
| CISD1  | 501.585246203512 | 565.72800641089  | 503.529187388654 | 549.117045813593 |
|        | 589.685739519627 | 706.087945508248 | 251.2365884576   | 449.701353531924 |
|        | 679.810781641519 | 617.539783972955 | 621.489785652602 | 771.554891868456 |
| CISD2  | 69.6449298794042 | 82.2766822827861 | 81.6486527718661 | 91.3967044940546 |
|        | 77.4769634299218 | 87.7460859694899 | 72.4651758215622 | 72.121833189378  |
|        | 114.136234102574 | 63.1091746640396 | 62.2965257278236 | 101.017461500409 |
| CISH   | 52.4179224871914 | 50.4022543872993 | 51.4308501933893 | 136.155022329495 |
|        | 54.802736966312  | 67.0290776715331 | 49.3854238365325 | 51.1694248620208 |
|        | 50.401623258584  | 60.0372015630618 | 60.4620008899889 | 49.1200355938198 |
| CIT    | 40.2543341073001 | 41.7337506166619 | 50.7502704822135 | 34.9221408381038 |
|        | 42.269054475455  | 36.4986986135769 | 36.7356360093603 | 38.5457716679071 |
|        | 39.0775870687758 | 33.6188027862739 | 37.2892641289258 | 41.863927676552  |
| CITED1 | 36.9060997041453 | 38.3322849790657 | 44.696023817801  |                  |
|        | 36.264823544143  | 37.5556299264699 | 37.9003288112261 | 40.1235656101329 |
|        | 34.6977013306396 | 38.7298222155532 | 38.528621456378  | 37.3687900733549 |
|        | 38.1421709520616 |                  |                  |                  |
| CITED2 | 349.371668774717 | 795.381998233245 | 168.7696164772   |                  |
|        | 265.520773157991 | 186.54041506387  | 285.689076149891 | 267.70610731202  |
|        | 156.337202322452 | 211.137455821181 | 148.358988653522 | 378.626656077546 |
|        | 221.76904201992  |                  |                  |                  |
| CITED4 | 1858.94179312821 | 185.563590013028 | 346.621778258188 |                  |
|        | 78.5141640924736 | 260.618790701505 | 187.689343320587 | 219.036267470696 |
|        | 250.65667565007  | 155.018308238778 | 196.427458710993 | 187.01452011215  |
|        | 186.54041506387  |                  |                  |                  |
| CIZ1   | 46.0920218698606 | 51.3084273211359 | 56.0477607422828 | 42.0102671859606 |
|        | 49.8304479381623 | 52.2089306840125 | 64.0985088513857 | 57.037639245179  |
|        | 57.0301170427216 | 58.5087296620514 | 52.5930185400362 | 52.4992300612807 |

|        |                  |                  |                  |                  |
|--------|------------------|------------------|------------------|------------------|
| CKAP2  | 65.6556779936059 | 125.503897988367 | 76.3583555666815 | 73.8480604979804 |
|        | 99.406307365363  | 56.796621176582  | 98.2843999216669 | 70.9266654533052 |
|        | 111.291087721139 | 61.6670071424359 | 61.0094935318105 | 57.6860752168769 |
| CKAP2L | 88.0979122006842 | 109.654559065946 | 85.5839487225537 |                  |
|        | 53.2046867327331 | 185.843333258735 | 59.4949177415847 | 180.128769312512 |
|        | 193.981651711507 | 116.576093937704 | 43.7303813515864 | 41.0050831223107 |
|        | 48.3648494350286 |                  |                  |                  |
| CKAP4  | 760.745188431719 | 1135.43644148537 | 862.031722874406 | 733.750875664432 |
|        | 632.577797921655 | 442.080188140864 | 395.875593488613 | 438.50123471613  |
|        | 813.242005949542 | 550.861615347663 | 538.716947884528 | 547.729200972776 |
| CKAP5  | 309.39599482851  | 365.517719684028 | 288.816567137193 | 235.925374041038 |
|        | 441.5479786095   | 321.550107822925 | 433.637087338002 | 302.422475486532 |
|        | 511.067537752967 | 261.138426747953 | 292.93036571522  | 266.178061771978 |
| CKB    | 313.399524593316 | 618.892379887961 | 174.117816184497 | 60.1837189855762 |
|        | 270.543988412382 | 1111.13061382818 | 156.56745342836  | 104.950400251642 |
|        | 329.978705095448 | 1337.53997230271 | 1125.31394383117 | 365.860501246879 |
| CKLF   | 381.533380474563 | 276.699609951994 | 496.791391622565 | 908.328776521114 |
|        | 154.775578306203 | 212.664574366477 | 422.931891494195 | 353.868749867979 |
|        | 250.457603010506 | 131.319040057576 | 137.10896135739  | 298.420882349382 |
| CKM    | 44.3355304829989 | 50.2163892855092 | 35.3649449469275 | 43.4410741327254 |
|        | 48.1473938886239 | 40.650742261428  | 55.9276266345493 | 45.5581356216957 |
|        | 41.9635525160083 | 44.4652605017595 | 41.2598458726002 | 43.1805016690297 |
| CKMT1A | 66.4399491500833 | 162.000275136397 | 46.6588655218735 |                  |
|        | 46.3203995372658 | 217.848539722853 | 64.5187138759372 | 213.933347509147 |
|        | 224.509915754308 | 361.57814355509  | 74.3981029634178 | 109.23113111292  |
|        | 102.24202987437  |                  |                  |                  |
| CKMT1B | 45.4799270968969 | 85.5135159896819 | 52.1242102345408 |                  |
|        | 40.4359177791566 | 120.465621774337 | 44.6524308640784 | 98.5663841503803 |
|        | 142.714450804595 | 188.13862794196  | 60.6266092582071 | 67.9599395822006 |
|        | 68.2309359831273 |                  |                  |                  |
| CKMT2  | 75.6471706262645 | 37.10170285405   | 43.3085358214154 | 42.4580504587581 |
|        | 43.2484996523549 | 100.423344358771 | 49.540449125788  | 45.1714698794331 |
|        | 45.0017158586743 | 68.9115937148858 | 65.6010220593397 | 59.7999569757275 |
| CKS1B  | 631.110081413363 | 549.67905283016  | 524.047008889711 | 188.887559923238 |
|        | 1068.10627239579 | 322.888035865453 | 753.976423227915 | 443.581460031166 |
|        | 608.579654909865 | 178.219279777774 | 138.189579100482 | 289.17237603899  |
| CKS2   | 487.065758294354 | 398.049525642349 | 167.075682925069 | 466.074595343541 |
|        | 305.786520619504 | 112.421316052392 | 422.237766234202 | 351.8239141662   |
|        | 415.251775687794 | 76.7630128194088 | 84.1922656126304 | 90.689813277023  |
| CLASP1 | 230.787791652978 | 254.023393889525 | 211.109957714241 |                  |
|        | 211.227389226633 | 175.362103430164 | 313.921236120658 | 191.426587373391 |
|        | 235.169335305672 | 218.313812956524 | 365.517719684028 | 379.189486013898 |
|        | 260.426488908824 |                  |                  |                  |
| CLASP2 | 63.9851732498913 | 88.0720840588632 | 96.3741876853801 |                  |
|        | 78.5141640924736 | 117.260454792593 | 109.221269056557 | 70.3935694362568 |
|        | 67.0904616289706 | 69.8899273527731 | 58.9069025298754 | 67.0361353184222 |
|        | 71.381069076765  |                  |                  |                  |
| CLC    | 47.0940613507321 | 89.4111455826308 | 45.3974838013476 | 117.8523906126   |
|        | 42.7982502551634 | 47.2927436772465 | 50.2016912396771 | 46.1673159982664 |
|        | 40.3316153483289 | 42.8936990772838 | 40.6373400186325 | 44.2527566343661 |
| CLCA1  | 37.3463875295726 | 40.148780650831  | 38.3166554965434 | 44.0451487108213 |
|        | 40.7779767565889 | 42.4580504587581 | 40.5585676679482 | 34.9580369221164 |
|        | 46.6944238390932 | 40.4136535208406 | 42.8263096141654 | 46.1592873342534 |



CLCA2 63.9851732498913 152.456314990408 2978.46032143413 54.8412943008635  
40.0599807618105 67.8208976798364 43.0930293831497 101.39385858723  
162.895543924742 56.9463858443402 50.6473771879221 53.655233033193  
CLCA3 48.5835484742456 42.8542642792862 45.989212296035 43.3078542962968  
41.1868052124344 42.157627240486 41.706879587091 47.6952179922944  
43.1805016690297 46.6598879466655 40.0766543123257 40.0557788909923  
CLCA4 35.6111578834671 363.67768546508 474.729653426958 44.9370339275041  
76.6914642534934 53.1052228246467 43.5627649099623 144.324036829708  
325.676668250281 320.889609846069 367.451332073134 1078.86166154061  
CLCC1 76.1417635449123 73.0070079786149 78.6602721596257 71.5948944013406  
68.0414563597154 66.4015820814547 115.98265270452 101.463033319045  
115.597550918377 60.5390917151449 69.7215372275927 81.5678694264684  
CLCF1 79.7564155881026 76.6346767983285 52.9111155236961 76.450993090133  
49.7235523248653 75.2735539010032 72.8653205184014 104.351256270039  
66.8632294055679 44.8997235283254 65.8220821345163 56.361708620372  
CLCN1 35.8208542506595 42.8542642792862 41.0356368374708 44.7980740332174  
41.6806984441849 42.4580504587581 37.0564573649223 34.9580369221164  
39.3750969348308 35.6208308220005 41.0050831223107 41.6550823405646  
CLCN2 41.4508241771315 50.4022543872993 53.3127618245672 50.378948785456  
49.8304479381623 41.159706131351 40.5585676679482 40.2382908228517  
44.4395580493118 43.0919221375514 46.0905079010237 39.8497227447888  
CLCN3 104.763913120468 163.585662735512 138.189579100482 76.1682394916873  
112.311249826645 83.7971204489995 112.805898501551 103.071727621257  
126.274897979594 128.365609268093 118.614027673431 168.407377937447  
CLCN4 41.5421429082231 35.7393138893354 37.7384958256497 39.6292788039793  
40.0599807618105 39.6251842352088 43.5627649099623 42.8482181313226  
44.0519245668737 41.5435611403119 41.9083581529276 43.8575940017119  
CLCN5 40.6559419616644 43.7644428186265 42.8270038153139 46.614092935749  
50.7615314686244 39.2248354955045 41.8315602975157 46.8954576545929  
47.798305839406 41.0057887014368 39.9070785037411 41.7575097298927  
CLCN6 82.0124493733776 75.7427148831879 78.9701459806641 85.9636350040248  
84.2728210732532 84.9970776435852 82.5708447805445 66.9340967279385  
61.6353280670242 92.8579489575841 88.7928773498158 84.1030588938732  
CLCN7 1060.64261592822 749.49934348018 1337.53997230271 1261.91478863258  
790.786577596971 525.917089808641 639.778130093087 532.043503787542  
639.778130093087 573.832332097619 766.647626178442 468.573956652904  
CLCNKA 54.4825201506931 46.7279104095328 45.1899271235974  
42.7489468897708 69.236458110243 45.3882138838137 50.7502704822135  
112.328675926999 53.0357938671646 50.294087888475 46.3635803515159  
44.2527566343661  
CLCNKB 40.148780650831 41.3610369241157 45.4865173433646  
40.646702696033 42.9090346219023 41.0582900711341 45.7452456977857  
53.6210959113222 41.1742244762318 42.4594149893798 38.4689132737495  
41.6550823405646  
CLDN1 137.081911344143 1310.03307063841 1123.99110499679 91.9185612536409  
2071.90741263566 241.222680673439 377.679662622526 167.999042735556  
1683.24873205783 666.816487335088 760.745188431719 862.031722874406  
CLDN10 149.185115531381 39.5595233162192 38.9790184198145  
42.1679276329916 37.0526522140242 37.9003288112261 39.1539892144371  
43.6796077697854 51.1554608265302 44.7672565800508 41.231791494452  
42.0424641526302  
CLDN11 62.6702927225656 60.9755936952178 63.5107036952143  
63.1604223919703 62.1836961153924 123.908152883436 63.1604223919703

72.9074911694002 50.6750785584772 160.973602503707 92.9043863423147  
95.1224420992193  
CLDN12 118.923419920947 115.735359157053 98.4930941487534  
65.084620579901 115.676508349703 81.3978207813439 103.913834330352  
69.7729022157455 203.913062066149 129.754481922118 120.20612443357  
141.447763308653  
CLDN14 62.3862792065884 71.787754116845 67.0120793767211  
71.4356132400211 73.8949517122417 65.7753115172195 64.9072331703985  
77.2048580540589 78.5375244257332 96.9662967971995 75.8976034525022  
88.1733775711738  
CLDN15 64.4895418579465 78.59966540743 118.67727980117  
88.4439480366515 83.8637731385607 64.863894209343 60.612413730593  
72.692416146584 97.9305595485282 69.1623287497421 74.280612516205  
65.6213260281822  
CLDN16 41.9918605927928 45.9266745571724 46.4150464549477  
45.334106390212 45.2556760873335 42.1046072075724 45.2830225385602  
41.8417024632349 42.0126083977597 42.0621425894624 41.3553369544097  
40.8681871019812  
CLDN17 40.4639532172338 37.10170285405 41.1367478979484  
40.7481155008596 44.0451487108213 38.4330755397458 43.3262148375525  
44.797320243931 40.8970401536578 38.957687788868 44.2925355984056  
43.2776458914333  
CLDN18 44.3355304829989 50.0642388903563 47.3861758958576  
46.3889523358338 45.6895223823001 45.8325181856483 44.1407835440612  
45.3389970694851 52.8843091010101 46.2768056702424 46.0095710163378  
49.3984571719129  
CLDN19 44.7044140979108 39.6123051184545 44.0451487108213  
47.481302504066 41.7929491793697 41.9543948167375 45.1017494688414  
48.0582855095143 42.4540072551568 45.5776159432079 40.1742127891824  
40.9683275553869  
CLDN2 41.1523487516364 37.2810767789306 40.5734458834617 37.9875302985336  
38.9496515344837 37.9003288112261 42.8684958525042 44.0390019242862  
38.6322728994674 42.785429206422 35.5179217192467 43.5738557773903  
CLDN20 53.3059058105836 42.7775752471711 49.1067959632109  
50.2163892855092 44.5668141895992 46.574682061365 44.3440839686558  
50.628152951493 47.27543600687 50.6486940895674 46.5650556481721  
45.5800840647989  
CLDN22 44.9896851005259 36.0366673493555 40.931294690669  
40.0698728584484 36.08956004634 37.0180934800573 43.1931731665131  
37.1317006162938 39.6609238036815 37.3179578037963 39.153226699662  
39.9519547348106  
CLDN23 215.290701336046 395.755223372329 305.786520619504  
218.675464231277 133.893108529325 76.331185787832 443.722380814789  
528.512401493184 274.731304343034 342.223067809915 252.487015579489  
181.064239330482  
CLDN3 314.006301513986 39.3999056968598 39.2707964550441 39.2780515621926  
45.4751076037511 39.2985791324641 66.1940959364976 66.0303950772736  
58.3564461855595 41.4397539024976 44.553780984244 40.7704587752083  
CLDN4 48.8333989709933 72.0112676564347 58.7382738968248 40.4359177791566  
50.2163892855092 46.4648868771662 60.7992483126292 78.1448136847078  
80.8728961146267 55.1089864632456 54.8532558909227 41.0657892043496  
CLDN5 61.6544855697851 88.8039637390786 175.798140574991 122.548989126048  
51.940083408061 258.657801126493 44.7255207589606 89.3868257841517  
42.9020321355927 129.550925624841 165.72797054597 137.897231677665

CLDN6 41.5421429082231 41.4508241771315 36.4564050256915 37.9875302985336  
40.7779767565889 35.4142595025086 43.0930293831497 40.3357777530419  
46.3203995372658 44.1379638573455 44.0409178714232 37.8490162439785  
CLDN7 687.862452802453 1068.10627239579 597.996273468244 112.23915619297  
724.881002237334 114.769498252688 1541.9572099378 850.205634919459  
1059.63540694644 412.880824530845 627.914461428624 506.75912743556  
CLDN8 280.202284365004 42.4493032770053 44.014441886238 38.042028333747  
41.0476065156912 38.9378717994178 67.6767845246581 97.0589984189239  
41.9635525160083 45.9004543328976 44.2527566343661 43.4709415392696  
CLDN9 52.4518619184838 42.3550738181144 39.7697110924474 41.8778873678551  
45.5809132232681 41.6178506967511 42.4939802311136 45.063792968927  
42.846832824953 41.3641352453779 43.0710577955487 43.6434576713809  
CLDND1 328.341232263338 409.724772942357 287.121456559795  
464.671881584567 380.4099232546 701.168333137671 435.094968715663  
322.594259063038 186.600931545083 413.918050849658 422.702925141293  
668.961646543849  
CLDND2 71.9062462001972 83.1308709614708 117.355761277966  
95.7571966348067 140.309952483162 146.983805232769 112.113501370522  
65.9143782252686 77.4186160113063 192.356440003154 202.154195547644  
73.408861359425  
CLEC10A 37.7935752088916 50.9140366501664 44.5134109184888  
71.3132890220731 43.9937687851164 69.4214927857472 43.3889851892323  
45.0972184964705 38.7298222155532 44.4652605017595 42.5824910860403  
48.5123041297835  
CLEC11A 275.407306413402 84.3672289945664 117.869393694564  
202.360546931172 341.97050042695 252.870708814507 51.3064929551674  
101.681822254799 61.9682048429354 138.521956104698 179.405972075294  
86.2974544521879  
CLEC12A 41.2773842727759 107.232979387172 40.8420925848403  
111.703187941409 40.0273874927069 41.817587685188 37.8815832675582  
43.3838505886856 45.60618144448258 40.8049408996274 43.1785624103807  
43.0462952354436  
CLEC12B 43.3638918705225 40.148780650831 37.1643693306382  
47.2009420656854 38.1644569189523 42.357910063876 45.8980298854198  
39.7509165247419 39.1790517315259 36.3612409063792 37.1059647239814  
39.0536056496869  
CLEC14A 104.986694941968 162.513675180449 310.900527198512  
158.862722884436 97.8825824657468 159.747484721905 52.4111687156893  
93.9880852748373 44.7058233759912 66.8026147385682 124.687212034276  
101.505513341316  
CLEC16A 202.627009037401 271.478148993789 377.847116683974  
196.709620264975 205.187554095744 165.843728663632 190.375732394043  
347.552309199761 222.81957100654 197.52820443061 216.358862796367  
202.081933301612  
CLEC17A 38.5007204246293 38.1312950900467 39.8299340037009  
36.5393857306744 39.4693871570028 40.3357777530419 35.8227939208521  
39.6474008369935 39.6609238036815 33.8984830800739 41.6336636285875  
44.0451487108213  
CLEC1A 54.1745577382276 60.6080172588224 104.135574209392  
151.047739254277 48.8381507187986 85.8059456975413 37.9430145836712  
55.1933004802607 50.2223403889892 47.1001757441025 62.1796792097014  
64.4156641487994  
CLEC1B 36.0144420013819 37.2810767789306 40.1985790927248  
52.3004056941891 38.6454098044474 47.0027453663546 40.3302268293707

37.33030683349 41.9635525160083 37.4302011516587 40.4504608195666  
37.4554876386402  
CLEC2A 42.442231667357 49.9547657591437 42.5406888281114  
42.4580504587581 42.269054475455 42.157627240486 48.4859552186772  
40.1474543172332 179.767874494671 42.5664883002833 40.6373400186325  
44.6484005362281  
CLEC2B 72.613397507717 53.7332797903102 51.5292723244077  
109.851796671234 55.9283039581662 73.8105012820769 40.1235656101329  
44.7044140979108 166.168385855406 51.0055825931636 61.7191344476295  
50.656598108034  
CLEC2D 990.431472174705 728.679189702033 905.76958446454  
675.832363405287 852.769974690777 782.639346040155 814.294297312057  
1134.52018899688 802.650020720921 1012.91803181784 806.827205415602  
1134.52018899688  
CLEC2L 38.304249186058 38.4330755397458 38.7745734037492  
39.7411455670172 43.2484996523549 36.3845892764084 36.7356360093603  
40.831207953647 38.8271346375425 37.6383530120621 43.401782064778  
38.8495095797881  
CLEC3A 44.0707087774725 45.04437764097 43.1660110696573  
45.0798408927912 42.4864576619427 117.642468577831 44.0202052410607  
41.9315419791594 41.9083581529276 49.1928206164702 75.5103237141193  
53.5643281930979  
CLEC3B 45.0985088502363 54.0461131287999 84.1401040507557  
76.450993090133 43.9450023643394 946.081492716653 40.1235656101329  
52.9813204449021 40.137818555383 633.385474385877 582.511224532378  
185.378190201718  
CLEC4A 71.0593419018503 57.7757446006652 73.4611178120841  
1097.92519921873 52.8843091010101 61.6702707724448 96.5615807039306  
55.1109784383525 56.0286903335634 55.6069214673486 50.9246396457383  
51.6660481331154  
CLEC4C 44.3355304829989 45.5587966941116 45.3675390992851  
48.055683217958 38.8834538955 49.641159251878 42.8684958525042  
41.2551966132486 44.0256815382334 45.2949878966345 44.2527566343661  
43.4290452504928  
CLEC4D 43.0001432913058 39.3999056968598 40.4882741869718  
74.4365426051588 36.6354013629791 38.7340969861754 40.5585676679482  
40.5158867964016 41.074824727477 33.4316681623175 36.2435874904689  
40.5703581862752  
CLEC4E 42.5193208629123 48.4497719907777 46.7508829977587  
88.1494891612632 44.0451487108213 41.0582900711341 48.3411413510851  
43.6434576713809 45.8325181856483 44.7958122466628 39.3667161654772  
44.2527566343661  
CLEC4F 42.5193208629123 43.683792219729 41.9666541498638  
37.5382094267692 41.2740822675592 39.6251842352088 60.3928833351886  
44.0390019242862 36.6312676076142 54.1683282066029 44.3763859390287  
42.7782216342806  
CLEC4G 38.0089018744739 45.8669209716694 43.6670755115848  
57.6511495792664 49.452985143568 82.5956705829173 44.4639405506967  
44.0390019242862 39.5806465938526 39.9948390976317 44.2925355984056  
50.5511827666954  
CLEC4GP1 45.2421183842044 39.5050383901884 39.8656165405284  
39.9697332660833 39.3667161654772 47.1477056711335 42.5660695551615  
37.7612949798895 40.2739700860114 43.128936937037 41.6657053704762  
41.2905987859365

CLEC4M 44.5282181324797 38.0226905622357 39.991353369336  
 43.3078542962968 39.0564222526273 38.9378717994178 39.7576136507593  
 37.2237132058632 34.6720534245631 38.4187686307607 40.3452320167286  
 37.3600014814388  
 CLEC5A 76.3933911546385 43.0971787292711 45.6989664108554  
 399.027079798213 42.7982502551634 37.9951997351435 57.8870110456492  
 48.5681478665796 43.3744503319109 44.2580151149956 40.4504608195666  
 40.6614700944853  
 CLEC6A 39.5676051939342 39.0102066700839 39.0775870687758  
 40.3180310664156 41.5668884168669 41.9543948167375 38.6243997507646  
 46.0633179231318 44.2607789091176 42.785429206422 35.3362091871364  
 41.1554481567603  
 CLEC7A 42.8036731479932 46.2625470410195 45.1912496459517  
 119.670948133232 44.0451487108213 42.6575535390785 55.0404566626821  
 42.9301944191913 39.1433524273815 40.1179210534118 40.4504608195666  
 40.5249349201863  
 CLEC9A 44.2718517563299 44.8044806324595 46.7058093820839  
 43.5627649099623 35.5895375758021 42.9695585740813 44.2166118829877  
 39.9576138799997 42.3138951003676 43.0177448037924 40.6373400186325  
 40.0557788909923  
 CLECL1 48.5835484742456 49.0697565324841 39.991353369336  
 106.582060920252 41.0885562160946 48.5835484742456 44.6032218589199  
 52.5909491535773 43.5669306063196 48.6124127998952 44.7114813656401  
 39.4490233720848  
 CLGN 40.2543341073001 40.5852276210998 40.7620472083159 41.7614975630362  
 38.4135023167287 40.4359177791566 40.1235656101329 40.7311497914871  
 39.7537274655115 40.7620472083159 41.5421429082231 38.3291713594599  
 CLIC1 1855.0119962662 1279.90288378214 1744.56688411113 2146.1548633579  
 839.412133682574 1342.10592868516 1125.31394383117 1211.8832855325  
 1455.64106630257 1598.78859278229 1157.65264077595 1645.71527614542  
 CLIC2 41.8409927585705 49.4982025424177 47.0055981216687 45.8844325913247  
 42.7982502551634 61.6219790276408 42.4939802311136 49.3880946790306  
 40.4220196471124 47.2299678280724 53.0177144132449 51.6660481331154  
 CLIC3 332.322497133752 400.093769705765 361.023743912857 113.528908699366  
 144.976378707447 79.953657052127 71.3527183280827 127.213248611204  
 173.013258797349 91.6713614282714 102.121491187437 61.1022920882065  
 CLIC4 178.060342847557 77.4046818339539 75.2391243965793 174.416924448198  
 101.250422688816 464.209794165593 96.0126406688619 104.650071846586  
 95.2956103624468 185.191228931155 172.433936159136 307.656792056993  
 CLIC5 45.5758521267508 44.1239711172417 41.8751578329365 62.3936376596431  
 56.2305155589239 46.574682061365 41.9393838138203 43.1567024035183  
 42.6366765186182 50.3388505346542 51.524711857679 48.7814131120945  
 CLIC6 122.495387796233 296.842555066902 175.056828374791 188.336316985251  
 63.8315840603904 50.4022543872993 1154.6386362 621.734974486654  
 345.36940514835 1297.78424326775 687.862452802453 875.787532301293  
 CLINT1 517.216393517181 349.589955244523 574.467486140819  
 444.320714312359 343.591727067749 556.417356025042 332.184073392054  
 382.312820492386 694.590958116425 369.032450063274 396.93169345515  
 680.279119780451  
 CLIP1 117.893268074013 115.048869605875 98.7535408247698 131.659314490437  
 70.5208169106324 209.967057706137 98.6825522152097 100.948192310983  
 117.823678167648 167.034910927177 145.561345203804 239.590143292142

|         |                  |                  |                  |                  |
|---------|------------------|------------------|------------------|------------------|
| CLIP2   | 80.3730667493235 | 56.463481075522  | 59.0308764112247 | 71.0820747228972 |
|         | 67.0163226819964 | 88.4695322145032 | 80.6083247572711 | 89.140025661759  |
|         | 63.994439164071  | 83.1874704625702 | 79.1922819549042 | 72.4094549259929 |
| CLIP3   | 334.639325701194 | 144.633447485038 | 102.150058925164 | 246.044674996861 |
|         | 191.298525555624 | 1459.69929955338 | 85.6236091398006 | 221.808325312905 |
|         | 81.8104679118753 | 1242.75259587926 | 1377.24483375075 | 729.342532316666 |
| CLIP4   | 74.0913177754682 | 55.6323803479191 | 69.7855392178808 | 125.801834682035 |
|         | 99.571118823509  | 215.452117252205 | 60.7992483126292 | 65.3019328668633 |
|         | 84.673375308972  | 85.6763929745253 | 112.984042589704 | 161.228738711412 |
| CLK1    | 227.243009473121 | 201.875082892488 | 192.564048264712 | 313.763121699885 |
|         | 186.042094228091 | 293.649670545233 | 102.053879707074 | 195.221917652149 |
|         | 153.626578526803 | 274.887090359131 | 273.379591993579 | 253.980053738171 |
| CLK2    | 123.918925337643 | 113.735641101347 | 171.957278903005 | 128.157032116902 |
|         | 183.584085676174 | 91.4446109489387 | 108.39424630351  | 106.233860458285 |
|         | 93.8968899420039 | 112.23915619297  | 106.582060920252 | 105.317399386109 |
| CLK2P   | 41.3387790895716 | 47.1856919329105 | 47.9035532886869 | 40.5484717678957 |
|         | 48.3287893866569 | 47.0027453663546 | 45.3597029614942 | 44.5658219748173 |
|         | 46.4569566520107 | 40.6022003765153 | 43.0971787292711 | 46.7182294568603 |
| CLK3    | 150.875092086496 | 187.486245101512 | 131.586389151079 | 176.057220407246 |
|         | 181.516519907011 | 155.956315815754 | 249.584588371496 | 167.626012561905 |
|         | 190.647389246848 | 161.25239489071  | 176.963666283432 | 170.475212920685 |
| CLK4    | 65.3531590366085 | 54.5374188496807 | 62.7605715573218 | 87.4850071876743 |
|         | 57.2960245538881 | 72.6182747525443 | 51.0013344286851 | 58.5406981871153 |
|         | 57.5883027758003 | 86.2118355769367 | 74.5654028199926 | 74.9294208313176 |
| CLLU1   | 40.148780650831  | 43.683792219729  | 40.6737160001291 | 35.2143190355414 |
|         | 39.1650142708257 | 40.3357777530419 | 40.4359177791566 | 35.9023742468744 |
|         | 42.4540072551568 | 38.1042454705119 | 41.8168470823451 | 38.2350720635382 |
| CLLU1OS | 33.5994525227062 | 45.2556760873335 | 39.4710743516517 |                  |
|         | 67.7121534934164 | 45.1137938810047 | 43.6670755115848 | 38.7337086062875 |
|         | 34.9580369221164 | 35.4332080966594 | 43.2988017098387 | 41.7272875295469 |
|         | 44.6484005362281 |                  |                  |                  |
| CLMN    | 45.6517320730042 | 43.4396866157171 | 46.0727230219512 | 45.7397504535169 |
|         | 44.0451487108213 | 36.8059561571675 | 43.6753843488695 | 61.3864512710242 |
|         | 41.7627910693483 | 43.1839109702714 | 47.2134341420411 | 39.4490233720848 |
| CLN3    | 155.123252685926 | 123.387418707738 | 275.975192937951 | 219.838542502016 |
|         | 248.527031538874 | 109.86466812799  | 147.875578127733 | 273.849703944739 |
|         | 188.36429659391  | 232.944023917808 | 197.720854621428 | 154.681233315729 |
| CLN5    | 114.148080724618 | 101.020328028769 | 102.443884864631 | 158.66112269515  |
|         | 86.8871118411414 | 157.463465828715 | 77.118454956956  | 93.2402285327166 |
|         | 95.2018660650205 | 238.647490689325 | 176.492987902471 | 218.701583105141 |
| CLN6    | 62.7669079605627 | 58.174555206394  | 48.0191002461099 | 58.9168466928565 |
|         | 70.0133734659853 | 46.1513019317765 | 68.2708120569221 | 54.1731035633439 |
|         | 79.9391673512018 | 54.4825201506931 | 53.5698357689852 | 49.6629259325705 |
| CLN8    | 44.0707087774725 | 56.2508140932179 | 68.3234331335073 | 69.4677195088043 |
|         | 68.4720753153522 | 47.7086093893038 | 53.6294062560285 | 55.3664856922473 |
|         | 47.5183209236505 | 64.2848885182563 | 60.7231725808886 | 62.1718158914638 |
| CLNS1A  | 356.133736281036 | 473.455955645297 | 541.631969808467 |                  |
|         | 322.774093041134 | 794.806085783439 | 366.129480083279 | 493.705301673753 |
|         | 415.759723627205 | 469.78210773245  | 488.183286350725 | 448.196293409768 |
|         | 583.690350347288 |                  |                  |                  |
| CLOCK   | 124.866058211181 | 67.4811066936124 | 62.0008474085033 | 97.4967204298499 |
|         | 82.0149542477384 | 112.873697337138 | 122.514153407264 | 162.181462827314 |
|         | 85.9087280306456 | 122.350248266459 | 94.7008981904016 | 76.7791768896805 |

|         |                  |                  |                  |                  |
|---------|------------------|------------------|------------------|------------------|
| CLP1    | 103.727217972304 | 91.31756001203   | 100.43365828852  | 96.2385885003071 |
|         | 156.088284999883 | 90.407200101342  | 125.752132815786 | 93.879589378061  |
|         | 91.9291200887492 | 82.966263655525  | 67.1477341610979 | 62.0967404944031 |
| CLPB    | 44.7044140979108 | 43.5873188565519 | 41.2365089689635 | 42.8235313007746 |
|         | 43.844855336215  | 38.2293008890613 | 44.8643898647322 | 45.2806199505029 |
|         | 40.8970401536578 | 40.1179210534118 | 43.1931731665131 | 37.7526485343328 |
| CLPP    | 185.771041814711 | 230.664926508522 | 241.31366702947  | 190.442443946259 |
|         | 462.105603187328 | 236.851068206869 | 278.067057781084 | 242.450054864856 |
|         | 232.47874874281  | 167.319747725488 | 161.439879456216 | 163.917208464731 |
| CLPS    | 36.3649677956953 | 37.7384958256497 | 37.9482157381008 | 37.7469621225553 |
|         | 40.3452320167286 | 41.0582900711341 | 43.9450023643394 | 40.6171774724171 |
|         | 48.0163377492228 | 40.6022003765153 | 39.9899430628542 | 37.8490162439785 |
| CLPTM1  | 683.099079617304 | 637.694633519528 | 626.390544175817 |                  |
|         | 531.69595054137  | 990.431472174705 | 479.696469083953 | 811.142611128461 |
|         | 813.242005949542 | 761.922486104216 | 585.771656887036 | 693.727004855319 |
|         | 401.202348352506 |                  |                  |                  |
| CLPTM1L | 776.670493028756 | 723.210613328966 | 690.568858101531 |                  |
|         | 555.727708387209 | 1347.15664445545 | 683.099079617304 | 1260.45604038487 |
|         | 688.390474335958 | 883.06773454117  | 534.056256675345 | 684.865133028228 |
|         | 479.079946537291 |                  |                  |                  |
| CLPX    | 185.771041814711 | 207.99040155018  | 116.709906902201 | 145.936763882526 |
|         | 165.190373710254 | 142.444971930298 | 214.873872837015 | 219.555240189863 |
|         | 224.14182624489  | 155.406719968961 | 139.796374175417 | 163.643603259911 |
| CLRN1   | 49.3901004211918 | 47.7246924920997 | 48.2883694323339 | 47.9915414951747 |
|         | 43.5836473788312 | 55.401776072578  | 50.0088611244948 | 53.4109882045447 |
|         | 49.1399035787209 | 50.3388505346542 | 46.1673159982664 | 45.0035308952466 |
| CLRN3   | 43.0930293831497 | 36.9994058279362 | 37.0642268327439 | 47.8164193292842 |
|         | 41.9842695818285 | 39.9397419279057 | 43.1931731665131 | 41.1575777497576 |
|         | 38.3418933808844 | 44.0409178714232 | 42.4580504587581 | 45.4799270968969 |
| CLSPN   | 42.9104454767916 | 45.5842286511645 | 40.4070046183108 | 36.0481934423077 |
|         | 38.6454098044474 | 40.9506062495231 | 38.1793598983615 | 39.853866204927  |
|         | 36.2733735494625 | 37.1275334308172 | 40.0766543123257 | 39.0536056496869 |
| CLSTN1  | 494.162646055732 | 456.023620287811 | 631.632335640448 |                  |
|         | 263.21493129287  | 331.762920362224 | 259.220844287491 | 221.847615564378 |
|         | 184.466097348908 | 572.19538884395  | 492.519023728038 | 534.881442644054 |
|         | 433.194113859912 |                  |                  |                  |
| CLSTN2  | 55.6268253440479 | 46.7591817286632 | 46.0727230219512 |                  |
|         | 49.5424425850549 | 47.6884372645373 | 66.295597720304  | 39.8695929627783 |
|         | 47.8947595316832 | 43.8482802038826 | 47.1001757441025 | 42.4580504587581 |
|         | 48.0350549043063 |                  |                  |                  |
| CLSTN3  | 63.2753814090696 | 75.5775406974686 | 66.4079972657486 |                  |
|         | 57.4595416719581 | 69.1862663389904 | 45.6129956328415 | 61.5000955267432 |
|         | 52.3068458655445 | 72.0655217037557 | 63.3872214856708 | 63.7598547294225 |
|         | 52.9609836781499 |                  |                  |                  |
| CLTA    | 364.628602969366 | 426.276230164353 | 260.062749979574 | 375.529704925121 |
|         | 308.183340806373 | 449.059703234741 | 563.573152902421 | 261.195021649777 |
|         | 390.647843814517 | 333.421080658854 | 351.883708151967 | 403.664724682094 |
| CLTB    | 612.014486689487 | 179.158053533144 | 477.410937135204 | 377.573838771285 |
|         | 252.206029058968 | 589.395944599882 | 204.606913997301 | 352.292837622545 |
|         | 339.854688605186 | 421.013324906569 | 465.595459259015 | 459.546279672649 |
| CLTC    | 60.2547250212462 | 59.7098454699348 | 50.3950981988762 | 68.6379135603075 |
|         | 52.2089306840125 | 52.2089306840125 | 58.0139597055449 | 56.0496524902806 |
|         | 72.1591028956359 | 47.2299678280724 | 50.4740079109854 | 56.0477607422828 |

|        |                  |                  |                  |                  |
|--------|------------------|------------------|------------------|------------------|
| CLTCL1 | 41.9918605927928 | 49.0986627051784 | 46.3150221024046 |                  |
|        | 38.8964578286293 | 39.8198309498737 | 43.9724628401189 | 38.6537063231682 |
|        | 48.9393675671956 | 54.7966692984192 | 39.5637454855233 | 36.131485826118  |
|        | 38.1421709520616 |                  |                  |                  |
| CLU    | 36.5000644040258 | 37.5797639044694 | 38.0452862258803 | 39.4469765850607 |
|        | 36.7800683777849 | 39.2707964550441 | 37.9974889154201 | 36.9876272594318 |
|        | 39.8089320768344 | 38.4979629870086 | 39.9070785037411 | 36.6284938772458 |
| CLUAP1 | 3520.7579823657  | 3010.38998829232 | 3253.86278287661 |                  |
|        | 3055.1209535841  | 3176.96480659196 | 2243.24648907474 | 3202.8848520816  |
|        | 3190.0108307463  | 2513.15722262176 | 3478.67753301901 | 3088.44063817936 |
|        | 2944.3433949897  |                  |                  |                  |
| CLUL1  | 38.6454098044474 | 40.0870341983328 | 42.4580504587581 | 40.0145811166794 |
|        | 42.5428186846763 | 41.8613406887824 | 37.9430145836712 | 38.745552403895  |
|        | 39.4433784795209 | 38.2550371518309 | 38.1835938174625 | 39.6682560919759 |
| CLYBL  | 50.4109031027914 | 43.9852350008246 | 49.5143331736386 | 61.8437321327938 |
|        | 58.2780916793348 | 72.1955435994725 | 60.0981687048269 | 54.1261903591606 |
|        | 53.8803543493797 | 103.199200862158 | 90.0223113095186 | 93.7260389087192 |
| CMA1   | 41.4508241771315 | 43.7644428186265 | 46.3411353377615 | 36.5393857306744 |
|        | 43.5544347011646 | 78.812106589086  | 47.7390230243778 | 41.1575777497576 |
|        | 43.2761454096265 | 40.1179210534118 | 37.7384958256497 | 42.357910063876  |
| CMAH   | 57.8578469574034 | 57.9509155144056 | 59.3549213146532 | 94.4501786945034 |
|        | 42.3685136297603 | 87.1735705257803 | 46.4944619663072 | 50.857522488428  |
|        | 41.1742244762318 | 51.7594352155304 | 55.5276281380084 | 56.1136936405786 |
| CMAS   | 291.42149037871  | 532.043503787542 | 535.449763420086 | 245.853111206859 |
|        | 265.667557678228 | 376.453560620912 | 512.691506909762 | 284.942182200489 |
|        | 523.679443405512 | 224.231862271463 | 262.9072085191   | 372.330242931581 |
| CMBL   | 90.8236750745974 | 135.769551614412 | 185.474249522831 | 93.6212502203405 |
|        | 152.608998839745 | 368.005081137665 | 196.666585862505 | 77.0262811825953 |
|        | 293.649670545233 | 289.625425434103 | 278.140612054333 | 327.786619565391 |
| CMC1   | 86.6655289455628 | 127.232160404726 | 148.521769674605 | 94.080489738662  |
|        | 213.830284761604 | 102.607924735378 | 160.917024416961 | 88.4439480366515 |
|        | 165.662539866309 | 65.2361525412756 | 73.408861359425  | 98.9017950719795 |
| CMIP   | 271.813877560354 | 310.706520144173 | 394.073743195755 | 369.258587948416 |
|        | 244.907057340556 | 166.36685654692  | 178.422506138888 | 134.307645598718 |
|        | 279.337384456822 | 295.430709655678 | 273.231509963261 | 426.276230164353 |
| CMKLR1 | 42.3433931248155 | 48.109747794187  | 39.1799070031819 |                  |
|        | 61.3747706295648 | 40.4639532172338 | 48.8744644207821 | 43.3262148375525 |
|        | 36.1375121409002 | 42.0621425894624 | 39.7835513496873 | 37.3687900733549 |
|        | 36.9976231206067 |                  |                  |                  |
| CMPK1  | 134.817234321847 | 168.426372075344 | 116.596605311488 | 171.992427227088 |
|        | 171.722423740869 | 249.002758392739 | 175.085270395769 | 277.878824242495 |
|        | 191.523447800488 | 175.673196925527 | 158.843766201769 | 235.514830602053 |
| CMPK2  | 44.5282181324797 | 67.6169355376864 | 63.3544794716167 | 42.9358255168086 |
|        | 38.3561682218911 | 41.8613406887824 | 45.8980298854198 | 44.0390019242862 |
|        | 44.7058233759912 | 43.6033221838149 | 39.6403089864678 | 42.9887069977696 |
| CMTM1  | 60.7556909485011 | 44.8942011457385 | 50.6486940895674 | 55.3345906164297 |
|        | 42.9627566278041 | 41.159706131351  | 54.9765783642973 | 54.7897614560757 |
|        | 44.3440839686558 | 41.1222709786153 | 42.4580504587581 | 40.5703581862752 |
| CMTM2  | 41.7397731376692 | 48.5905518770847 | 50.3950981988762 | 377.679662622526 |
|        | 39.0564222526273 | 87.3429006429216 | 135.737771384104 | 49.5185112777773 |
|        | 35.3227485563945 | 42.3606390470387 | 44.553780984244  | 37.1747156131306 |
| CMTM3  | 273.645674189546 | 137.239944506217 | 115.93159653774  | 247.47601939651  |
|        | 92.0958762013613 | 158.918242816842 | 242.190059393491 | 227.059460958349 |
|        | 74.1677748563797 | 139.08163074096  | 106.140215438654 | 134.394743648475 |



|       |                  |                  |                  |                  |
|-------|------------------|------------------|------------------|------------------|
| CMTM4 | 110.818741525514 | 69.392742408248  | 63.0383605052305 | 53.8658229797154 |
|       | 59.067083526499  | 54.5358897781765 | 86.3793067659925 | 126.882948837851 |
|       | 61.8529316708431 | 73.3479915711031 | 59.4549267937433 | 77.951185234781  |
| CMTM5 | 35.9305494063137 | 44.4411734611229 | 40.301483914446  | 41.7614975630362 |
|       | 36.4434672195785 | 46.8954576545929 | 44.6032218589199 | 40.4359177791566 |
|       | 38.4344387289956 | 38.957687788868  | 42.2618615571566 | 42.0424641526302 |
| CMTM6 | 368.727384734032 | 473.455955645297 | 441.247306467645 | 1051.58050264114 |
|       | 551.490493022416 | 226.553946570328 | 355.495119544081 | 390.489537450621 |
|       | 542.467997217663 | 277.12373983597  | 420.761600667193 | 466.935292808402 |
| CMTM7 | 310.706520144173 | 312.530335465784 | 361.632211543977 | 499.744856832174 |
|       | 1061.61186520958 | 295.69493803986  | 795.381998233245 | 316.185342210304 |
|       | 459.182372959714 | 657.031980628955 | 670.271164195182 | 665.510487460287 |
| CMTM8 | 229.697141930047 | 226.202485756581 | 252.487015579489 | 136.786772972738 |
|       | 319.092568066532 | 107.60291670075  | 273.231509963261 | 212.813224717262 |
|       | 184.218705402964 | 159.949298350852 | 218.19156738004  | 293.702642091269 |
| CMYA3 | 41.0608773166058 | 46.1569135229922 | 41.528370959196  | 39.2780515621926 |
|       | 37.8679241954337 | 42.5660695551615 | 38.0598374201407 | 41.7419877611072 |
|       | 41.1742244762318 | 37.3179578037963 | 40.1742127891824 | 38.3291713594599 |
| CMYA5 | 74.6776631832355 | 138.418964807714 | 106.175784900392 | 54.2886483704949 |
|       | 77.2608629053098 | 85.2805684630976 | 105.382126899524 | 91.1834104205004 |
|       | 116.094881058504 | 245.630020408551 | 178.012676342712 | 96.6957892186886 |
| CNBD1 | 42.2455707947223 | 39.6123051184545 | 37.9482157381008 | 42.0102671859606 |
|       | 41.1868052124344 | 38.9378717994178 | 41.8315602975157 | 42.357910063876  |
|       | 37.4540772310118 | 42.3606390470387 | 46.2560238004757 | 35.4484652445078 |
| CNBP  | 370.495645380436 | 555.727708387209 | 549.407911286514 | 552.860979481958 |
|       | 565.72800641089  | 903.756866967447 | 411.73316510051  | 318.527516338791 |
|       | 500.168833003599 | 299.524171071613 | 375.529704925121 | 581.093069802913 |
| CNDP1 | 44.0328992213727 | 41.8848959280916 | 43.9450023643394 | 54.1240583139871 |
|       | 40.5710637884029 | 47.2927436772465 | 41.8315602975157 | 38.8495095797881 |
|       | 42.2577689927563 | 39.4710743516517 | 39.153226699662  | 46.0633179231318 |
| CNDP2 | 1561.83892117664 | 3313.98659031004 | 1273.52492984569 | 1673.60994518271 |
|       | 489.42739398838  | 617.271611375695 | 2232.61002288121 | 1191.93354266135 |
|       | 2672.94421680196 | 2559.659041589   | 2178.59848996529 | 1891.37245670852 |
| CNFN  | 295.127975044241 | 70.7702047405718 | 70.8606919488782 | 57.8277957325085 |
|       | 168.307676704652 | 60.4065050472082 | 247.700075839517 | 353.338686666875 |
|       | 147.165235402905 | 88.5601339449828 | 91.6826894933058 | 70.0519247980052 |
| CNGA1 | 56.6086202928268 | 58.3627863274274 | 60.6567691532561 | 38.2041059863839 |
|       | 68.9766943946607 | 46.1513019317765 | 78.1623301184313 | 379.031536537372 |
|       | 57.7865070833351 | 156.844010597219 | 79.1922819549042 | 174.985336606027 |
| CNGA2 | 36.2496364442264 | 40.4359177791566 | 41.6977706798234 | 40.7481155008596 |
|       | 35.9894133432376 | 45.3882138838137 | 36.634024014558  | 38.8495095797881 |
|       | 37.2810767789306 | 36.8059561571675 | 40.0766543123257 | 40.9683275553869 |
| CNGA3 | 40.9201978689462 | 39.3585350448719 | 42.0164252051496 | 42.1607322031054 |
|       | 43.5808453440435 | 39.3483872785093 | 39.824238926666  | 43.0390857698452 |
|       | 39.9871741554388 | 39.0648733099061 | 42.3440399888092 | 45.0035308952466 |
| CNGA4 | 41.483412492426  | 41.0226232127351 | 38.941855825269  | 41.1507980856436 |
|       | 40.8873907150245 | 38.9661430990729 | 39.0458123429605 | 45.0972184964705 |
|       | 41.2424637338424 | 38.7008388965825 | 37.4642807402741 | 38.4829727716328 |
| CNGB1 | 50.5670783769975 | 42.8542642792862 | 50.2869791217819 | 52.5307002738469 |
|       | 52.2089306840125 | 44.3648993568405 | 59.9792284253187 | 63.7002949745101 |
|       | 49.8304479381623 | 58.5087296620514 | 46.0905079010237 | 51.0013344286851 |
| CNGB3 | 49.540449125788  | 49.4067286971348 | 47.646800205189  | 46.8954576545929 |
|       | 44.9936360641969 | 39.3841861812262 | 34.5633623842083 | 40.5158867964016 |
|       | 40.9901805728485 | 41.7405682794166 | 37.3687900733549 | 38.9496515344837 |

|        |                  |                  |                  |                  |
|--------|------------------|------------------|------------------|------------------|
| CNIH   | 307.754078087321 | 340.311633794489 | 301.139592414061 | 365.860501246879 |
|        | 296.39460008432  | 467.351570171652 | 169.061093538895 | 200.082941320005 |
|        | 296.664472126617 | 154.93193897888  | 165.29964739949  | 372.02379581293  |
| CNIH2  | 42.2618615571566 | 43.7644428186265 | 50.1579724208315 | 44.6024422254257 |
|        | 45.7349698678081 | 42.157627240486  | 44.7980740332174 | 44.4455094736026 |
|        | 49.532546810992  | 42.5664883002833 | 44.2527566343661 | 39.8873706855774 |
| CNIH3  | 51.0225132036905 | 51.3800036046133 | 39.1799070031819 | 49.3654837541353 |
|        | 38.2496050953547 | 41.554942319225  | 58.2315917325629 | 55.6904617926772 |
|        | 39.0775870687758 | 53.1993028936883 | 56.5402453093703 | 44.2527566343661 |
| CNIH4  | 320.812668695531 | 295.856741468603 | 388.580556899321 | 427.972184856393 |
|        | 277.284338888467 | 191.955732544426 | 552.860979481958 | 448.508714709248 |
|        | 671.959673037066 | 286.497342437243 | 289.17237603899  | 499.550408983803 |
| CNKSR1 | 49.6241203903354 | 88.3636380348802 | 70.8606919488782 |                  |
|        | 46.4555908533915 | 64.3571664944642 | 40.9506062495231 | 54.8074655158941 |
|        | 63.287067794195  | 62.9922928277769 | 63.5107036952143 | 62.6048727240291 |
|        | 52.0359304386476 |                  |                  |                  |
| CNKSR2 | 41.9407041937973 | 41.2598458726002 | 45.3974838013476 |                  |
|        | 42.2496337895968 | 44.7829632472754 | 42.9695585740813 | 45.7452456977857 |
|        | 44.9977782988116 | 42.9020321355927 | 45.3530683538086 | 43.1931731665131 |
|        | 40.4639532172338 |                  |                  |                  |
| CNKSR3 | 111.691813916343 | 130.239763076999 | 90.8831233784641 |                  |
|        | 85.1847490113446 | 139.847976281228 | 159.22638189198  | 109.615289274998 |
|        | 66.4207938873541 | 94.7110944331075 | 207.741669973713 | 218.013913036142 |
|        | 249.220968977184 |                  |                  |                  |
| CNN1   | 191.394143505573 | 112.854520785284 | 95.5022104475922 | 79.1000897258245 |
|        | 81.2359429678503 | 4617.45430247751 | 33.3231576795423 | 142.309369995384 |
|        | 41.4636047919453 | 3153.71394627237 | 3114.05035137552 | 3234.36469403715 |
| CNN2   | 421.971171686029 | 353.751797948675 | 295.69493803986  | 404.674869177442 |
|        | 399.66182195331  | 150.31039735991  | 150.925721934159 | 108.213380368446 |
|        | 301.257549182222 | 170.560304063093 | 204.273912273411 | 249.101015988111 |
| CNN3   | 1315.60546296361 | 425.776214512634 | 307.264133974364 | 651.078746026341 |
|        | 508.474794786176 | 1127.96214301065 | 651.969296681551 | 675.832363405287 |
|        | 551.1195044975   | 1000.65752290829 | 831.578043520215 | 1186.06822787922 |
| CNNM1  | 44.7044140979108 | 44.2105195734073 | 44.6032218589199 | 47.3574589211166 |
|        | 67.6011992144113 | 60.2867996701867 | 47.2927436772465 | 55.3122077514658 |
|        | 63.1091746640396 | 66.5422130374814 | 68.878562323012  | 57.2350830635912 |
| CNNM2  | 40.4139947039718 | 46.6996902348633 | 46.0727230219512 | 49.9014504704021 |
|        | 43.0669898157628 | 43.1826328292558 | 43.0177448037924 | 38.7023886970298 |
|        | 40.9901805728485 | 41.162473449625  | 42.7815195866158 | 43.2115532536912 |
| CNNM3  | 81.2359429678503 | 99.864496342189  | 96.6895594961001 | 101.867388894697 |
|        | 98.7869013773721 | 72.7213787264217 | 97.4515987591398 | 95.2915739972533 |
|        | 96.7422527189063 | 99.3142021810133 | 102.87193290903  | 88.0877175295544 |
| CNNM4  | 88.8760662992208 | 60.4646208319121 | 74.4508307047509 | 75.9099205260748 |
|        | 76.5375674421131 | 58.0095518210499 | 63.2726414544553 | 96.4971762611189 |
|        | 75.5681913475287 | 69.1623287497421 | 70.7045582269595 | 58.4200819624972 |
| CNO    | 143.6667863386   | 148.458171821142 | 139.883681090758 | 103.349712762251 |
|        | 153.660685857642 | 102.322851896214 | 152.555556133364 | 99.1438953564062 |
|        | 161.500218853268 | 129.550925624841 | 127.051878502711 | 122.084249177093 |
| CNOT1  | 222.728316525835 | 354.158105175308 | 432.355300448283 | 263.706801812277 |
|        | 155.519517541864 | 228.328635242684 | 268.808342880355 | 250.308866488702 |
|        | 388.74199767336  | 345.443895623911 | 309.102633242573 | 261.421333472097 |
| CNOT10 | 114.666088291556 | 122.44445355345  | 144.079981029616 |                  |
|        | 128.635811501506 | 227.059460958349 | 106.067766766889 | 192.470747766298 |

|        |                  |                  |                  |                  |
|--------|------------------|------------------|------------------|------------------|
|        | 164.312946712409 | 136.843285454801 | 128.952325188088 | 104.486555491331 |
|        | 90.689813277023  |                  |                  |                  |
| CNOT2  | 276.267583952979 | 243.609178976074 | 228.809697062726 | 188.713487905549 |
|        | 193.703214707909 | 250.866560791828 | 244.109166881519 | 187.277044459942 |
|        | 437.542517888395 | 247.416016413788 | 255.483653108786 | 311.301613620475 |
| CNOT3  | 107.413918714848 | 177.878878992191 | 127.694844372277 | 154.718907273467 |
|        | 214.732968482214 | 139.758805241617 | 234.172977976583 | 157.082769443568 |
|        | 314.609371608151 | 156.591349262922 | 169.223049028418 | 101.156215957297 |
| CNOT4  | 110.973625869849 | 88.8772406115484 | 90.2790229242453 | 88.9641595603127 |
|        | 87.8967913380047 | 98.6706537801886 | 80.8285585008048 | 80.5237920647059 |
|        | 116.007007037602 | 119.634256037186 | 96.0770202999531 | 106.454367084321 |
| CNOT6  | 195.018775118528 | 153.42135363926  | 206.649471678786 | 145.526972410673 |
|        | 146.196470375622 | 175.114727506747 | 176.492987902471 | 209.438270055157 |
|        | 219.103786570566 | 245.27542001049  | 234.8262403783   | 187.026092504992 |
| CNOT6L | 52.2236479204029 | 57.9151768280253 | 55.4057622584684 |                  |
|        | 65.9703614596867 | 52.8190882379316 | 46.0364000143537 | 47.8947595316832 |
|        | 59.7078429195904 | 67.9753615619786 | 69.6511571901941 | 60.9446532180211 |
|        | 56.6888826857797 |                  |                  |                  |
| CNOT7  | 97.5104526799755 | 111.643323610073 | 137.360931076154 | 124.350816245276 |
|        | 139.712472369259 | 129.675613712326 | 111.97030382494  | 75.7947206223934 |
|        | 107.087870999702 | 67.9259304928255 | 89.2185019250322 | 138.728648830528 |
| CNOT8  | 99.8754776648876 | 84.6655522075709 | 97.1271615802556 | 107.242476674629 |
|        | 91.8935361535002 | 83.7971204489995 | 81.7434024567356 | 104.089998273812 |
|        | 106.907589984092 | 85.3718124658316 | 69.7644070698124 | 116.295564219236 |
| CNP    | 46.5549623118323 | 41.0678614026819 | 44.0451487108213 | 44.265834798964  |
|        | 36.5393857306744 | 43.9724628401189 | 44.4639405506967 | 46.3685439301234 |
|        | 46.7760357462635 | 44.8997235283254 | 49.1067959632109 | 42.357910063876  |
| CNPY3  | 130.261747462753 | 133.192618821838 | 92.0606634977068 | 161.870972980732 |
|        | 113.747633871556 | 99.2749350936362 | 154.166621635012 | 79.1039287828151 |
|        | 156.433762355183 | 100.151116279734 | 95.39134217438   | 109.889322825648 |
| CNPY4  | 75.8122107270212 | 53.5893790024601 | 51.2776048338    | 63.1604223919703 |
|        | 66.8129352840907 | 78.9521593412581 | 55.012605207172  | 56.9719061986797 |
|        | 60.8635925649592 | 63.3872214856708 | 60.6505672212119 | 66.6118713143653 |
| CNR1   | 39.4710743516517 | 41.554942319225  | 45.989212296035  | 40.646702696033  |
|        | 46.8674366115656 | 49.2050538150106 | 36.3194282084339 | 40.7311497914871 |
|        | 44.1519466943185 | 40.4136535208406 | 37.3687900733549 | 46.2625470410195 |
| CNR2   | 37.8386378737561 | 42.5269793679335 | 43.4709415392696 | 52.1201052574162 |
|        | 42.4864576619427 | 40.8634043028528 | 40.1235656101329 | 42.4580504587581 |
|        | 42.357910063876  | 37.8217989841918 | 42.8263096141654 | 42.4607795638552 |
| CNTD1  | 46.6348258763289 | 47.765848710116  | 43.4709415392696 | 40.9607305725196 |
|        | 40.2449343247539 | 42.750861693377  | 43.0930293831497 | 44.8997235283254 |
|        | 38.8271346375425 | 46.1390887492649 | 43.5710871617107 | 44.0451487108213 |
| CNTD2  | 46.7293238583888 | 41.2598458726002 | 49.7350276169552 | 44.6905691366696 |
|        | 44.0451487108213 | 44.6524308640784 | 58.2315917325629 | 45.1714698794331 |
|        | 52.5772854102326 | 47.4767851750188 | 41.9908237694988 | 42.1537476443423 |
| CNTF   | 41.4508241771315 | 36.3110701990588 | 38.4043916290561 | 34.4382958501338 |
|        | 43.6587492470348 | 37.3799542961839 | 39.1539892144371 | 38.8495095797881 |
|        | 39.9444191873552 | 39.7835513496873 | 37.7384958256497 | 37.6557714476853 |
| CNTFR  | 41.3848620620968 | 38.4829727716328 | 41.9666541498638 | 39.2459792718908 |
|        | 88.0877175295544 | 64.1538986629848 | 41.9820792173615 | 43.4544762830742 |
|        | 48.4869909888679 | 43.9910347090126 | 42.0750889188255 | 40.0136663626344 |
| CNTLN  | 54.2648201582657 | 55.8678615468603 | 42.640829914102  | 57.8277957325085 |
|        | 42.7107928951766 | 68.6424653037264 | 48.6395795163502 | 45.3872406432794 |
|        | 39.6609238036815 | 52.2256177934134 | 47.299647867533  | 51.5741598315033 |

CNTN1 69.3971407893143 42.3711524005238 41.785676764591 40.2455972565968  
43.6587492470348 111.626292905866 44.2166118829877 43.4544762830742  
46.824299585607 59.1496467460507 53.2083147523758 69.9144520559912  
CNTN2 42.7150227340364 36.3110701990588 42.157627240486 45.8844325913247  
43.3332476888305 49.5424425850549 42.7431359850339 43.9366081640576  
46.1101825640108 46.325232414659 40.6373400186325 41.863927676552  
CNTN3 50.1533437545239 47.2770121962655 171.501864800548 44.0451487108213  
55.4030910454028 71.3932787152381 81.2136969156029 41.0381860307445  
59.4236178078244 68.8167148906225 69.7215372275927 79.8331445290301  
CNTN4 41.0871827071116 41.1262212547458 42.7815195866158 37.1259822167035  
39.5317722761104 48.5251714843637 39.4859911554583 42.157627240486  
40.5465626311506 41.5435611403119 43.995454742337 43.4709415392696  
CNTN5 40.2543341073001 38.4757888225478 40.6737160001291 38.2041059863839  
35.2729706573192 35.2067831864574 38.8417151851134 38.745552403895  
37.3600014814388 43.2988017098387 38.5668610487033 39.2839132447749  
CNTN6 53.1309801459151 48.8584917918986 47.9035532886869 43.5627649099623  
55.4030910454028 47.7556758818053 50.8388984085636 49.3880946790306  
53.9287524861617 51.2318935933116 51.7538628098347 47.9566297250148  
CNTNAP1 89.7554896946341 79.271901834289 70.7238101239421  
56.7927450229377 67.9032387662129 97.4967204298499 38.5066108855005  
53.4109882045447 44.8997235283254 68.0556717366572 63.3544794716167  
57.2350830635912  
CNTNAP2 40.8681871019812 36.5219488315447 38.6727842796202  
43.1847628331565 40.3452320167286 111.669813610213 46.0228732507872  
180.53214143537 41.863927676552 41.8613406887824 44.0409178714232  
43.9541718254769  
CNTNAP3 36.3649677956953 35.4484652445078 40.4070046183108  
47.8164193292842 39.2608760193011 49.5424425850549 38.7337086062875  
44.6107027295193 34.4716904283753 44.6918600441328 44.0409178714232  
44.7401523707775  
CNTNAP3B 42.8596678196469 41.159706131351 43.9217273706293  
42.7431359850339 40.8351751854504 40.4779565600984 42.6786833450085  
39.4710743516517 42.992884918158 45.642304356051 45.8628493605663  
44.3977035913759  
CNTNAP4 41.0043775553254 42.9887069977696 45.645828394758  
47.2009420656854 42.039525923161 41.0012755104374 47.5130990528612  
47.2368301203382 51.7289068180135 40.7620472083159 43.3085358214154  
42.5365257225985  
CNTNAP5 44.1737502492846 42.1372626664516 43.1931731665131  
44.0991023527481 40.3452320167286 43.7630587657205 42.629412460409  
46.9454141780379 40.9460396298042 42.9358255168086 43.0710577955487  
40.2669497398702  
CNTROB 55.5276281380084 54.5374188496807 69.4967762263181  
56.2508140932179 63.3638417360105 58.1798515131249 63.3924515518667  
69.8941497035747 54.4912806027381 73.3479915711031 74.280612516205  
58.6481644777552  
COASY 236.910422092851 253.605641311356 285.97627172608 175.936150174315  
289.472303440614 145.865118592916 270.253329297593 114.719721626067  
278.140612054333 300.412043023998 261.081844108932 255.800286504974  
COBL 42.6036491382658 47.4076235350059 47.0940613507321 47.6687908290818  
42.4864576619427 59.4949177415847 39.6535880152834 141.942507674009  
47.3791873993182 52.6879797806876 59.6608518093582 44.4475838947656  
COBLL1 292.065366215278 755.106456358949 569.244038644604  
413.516548092483 507.498146970824 486.757854744053 334.016152807947

|         |                  |                  |                  |                  |
|---------|------------------|------------------|------------------|------------------|
|         | 312.7217964763   | 615.838713743621 | 1676.22158135012 | 1060.64261592822 |
|         | 1149.02954135912 |                  |                  |                  |
| COBRA1  | 247.47601939651  | 214.03015073442  | 152.200107222761 |                  |
|         | 164.757702308188 | 179.756604242873 | 187.689343320587 | 356.948763043851 |
|         | 146.196470375622 | 199.035083736742 | 204.992039590717 | 220.743173420176 |
|         | 153.177725521199 |                  |                  |                  |
| COCH    | 45.5758521267508 | 68.2184093305248 | 40.4070046183108 | 65.2001674269291 |
|         | 70.0133734659853 | 47.417512242919  | 71.599955759893  | 75.9659252679925 |
|         | 69.6511571901941 | 47.4767851750188 | 39.0788811357542 | 43.2776458914333 |
| COG1    | 90.1830062843449 | 84.1224653052549 | 116.184007615285 | 87.2643859655159 |
|         | 84.4230484528318 | 95.6783002876222 | 77.4046818339539 | 72.692416146584  |
|         | 86.0735583144514 | 89.07557840469   | 94.8036856848998 | 81.6458112867541 |
| COG2    | 165.775214685061 | 161.844470327205 | 230.763782802004 | 151.344720108793 |
|         | 201.301705082976 | 166.431392410887 | 149.156754860718 | 185.563590013028 |
|         | 212.945601743319 | 274.994470779348 | 239.350719871688 | 191.361705136492 |
| COG3    | 89.7554896946341 | 65.4493288628375 | 75.4317740345967 | 62.2878942799819 |
|         | 58.1576967525216 | 72.207833811212  | 65.5800543140431 | 55.9303347977781 |
|         | 71.1441318672051 | 79.9126192278104 | 92.563449632567  | 85.3930226794591 |
| COG4    | 148.32293918881  | 112.306016029829 | 189.164097331837 | 83.4756142147167 |
|         | 82.7394574977114 | 100.802977734227 | 156.833474582387 | 148.906660152784 |
|         | 141.924244643825 | 131.779333469955 | 126.920579478593 | 100.567309348016 |
| COG5    | 63.61404854326   | 73.0385284042351 | 77.5718089378881 | 71.2572485987604 |
|         | 80.1809075683154 | 71.5249259772583 | 78.1623301184313 | 70.3935694362568 |
|         | 72.9752827496503 | 60.5548506034677 | 56.432280646473  | 76.0709828871754 |
| COG6    | 189.47090669378  | 150.262748333939 | 148.521769674605 | 129.785929766258 |
|         | 95.1131101630937 | 129.091447141381 | 136.293724800658 | 69.7729022157455 |
|         | 121.737071786167 | 108.111248374368 | 106.140215438654 | 128.873145026756 |
| COG7    | 83.7215159198897 | 99.4123924179498 | 129.2860308084   | 88.3459116251233 |
|         | 80.6200293361016 | 88.6287852712744 | 89.2913927776683 | 97.4421930425128 |
|         | 80.4554147910354 | 120.447568925399 | 96.5451512198207 | 97.9497090233081 |
| COG8    | 55.5276281380084 | 54.4190527512508 | 70.6592421895338 | 50.0526763693329 |
|         | 57.1935729219207 | 54.2503023961401 | 64.4736987797413 | 56.6910078150745 |
|         | 92.8206287414481 | 45.7911932481722 | 49.319499137678  | 44.6484005362281 |
| COIL    | 188.887559923238 | 173.511692216696 | 198.623556176842 | 138.581471125405 |
|         | 263.832968124343 | 171.302214895226 | 281.262083731954 | 220.054040993848 |
|         | 263.096895937991 | 198.288493088076 | 202.708232693973 | 176.670909065664 |
| COL10A1 | 496.303918649238 | 40.2493681589104 | 39.8299340037009 |                  |
|         | 85.3754356809649 | 39.6535880152834 | 42.9695585740813 | 42.7431359850339 |
|         | 41.6466169548846 | 45.4799270968969 | 36.4651112441576 | 39.8184668132023 |
|         | 37.8490162439785 |                  |                  |                  |
| COL11A1 | 361.776841675393 | 41.7614975630362 | 39.6705473876526 |                  |
|         | 59.3618843678775 | 40.8873907150245 | 45.3424709970969 | 39.7264117629268 |
|         | 42.8482181313226 | 40.5497440764264 | 40.3418326960047 | 40.3104838541906 |
|         | 43.2177497174408 |                  |                  |                  |
| COL11A2 | 42.5193208629123 | 39.0592366229872 | 42.6981470312295 |                  |
|         | 41.4606714407332 | 43.6782245625941 | 41.0970259989281 | 40.1662958063877 |
|         | 40.4625704251354 | 44.1070537445005 | 40.650742261428  | 39.6719190054379 |
|         | 43.8291226513066 |                  |                  |                  |
| COL12A1 | 546.287195443189 | 106.691530592115 | 76.6346767983285 |                  |
|         | 120.068630086702 | 190.548265163011 | 109.25950270396  | 94.5261917871909 |
|         | 80.4334958198115 | 67.1702819938085 | 75.257352283328  | 65.4137646609535 |
|         | 86.2488614616838 |                  |                  |                  |
| COL13A1 | 67.6767845246581 | 52.683711208052  | 57.2674335547631 |                  |
|         | 60.0856496605043 | 54.802736966312  | 60.1685144469519 | 32.2796484885898 |

49.239733414453 39.3750969348308 67.3601172371813 72.9488994273323  
43.9541718254769  
COL14A1 78.3851687801705 80.8285585008048 64.5232087947596  
91.9185612536409 72.5027069303875 189.451890957713 51.0013344286851  
53.4109882045447 52.5772854102326 87.5967418612698 75.8976034525022  
50.1579724208315  
COL15A1 686.154904023493 293.583101558009 302.20349084931  
708.839262759372 189.890451486324 230.197573134703 73.3042538589134  
186.984157187427 59.5929655877036 127.937436596431 116.938715935808  
182.448444305445  
COL16A1 346.844545554188 83.4103205764925 56.3471340054074  
193.897678586782 179.994715581707 259.456935785521 53.7423898357583  
145.335751135441 67.4304134449444 233.07404514708 252.206029058968  
230.975122271137  
COL17A1 47.1962846565261 211.926421068313 254.920345078558  
63.9570596163747 43.5544347011646 46.7386599624801 35.2729706573192  
69.1523164481201 135.644934816665 222.336600180634 176.318618244066  
249.451753363306  
COL18A1 167.920131968611 93.7260389087192 171.386815652277  
112.659254685552 96.7351644023249 105.267519627444 45.1694246393676  
84.9280683258012 61.8824218975538 97.2865629929716 106.985301705486  
69.9767092409915  
COL19A1 42.0833588105728 39.5050383901884 37.3687900733549  
40.3180310664156 38.9496515344837 55.2515150764173 39.1539892144371  
39.3113207075992 41.8197029429821 40.7620472083159 44.8372404608604  
41.8200132437731  
COL1A1 13656.2581082905 1670.01014610464 1448.17151189672  
2771.14077845128 3502.80810319252 746.252816568691 225.875798191473  
842.3367709562 252.134800295199 507.375704144286 363.002913525646  
195.654315886452  
COL1A2 8827.37298329149 1260.45604038487 982.428740433235  
2337.7738990994 1855.0119962662 1450.53108586858 124.841811761412  
634.226367147025 170.327588764719 824.946988188872 370.027120412227  
371.513106715598  
COL20A1 46.7293238583888 48.1627097465883 48.1331309338997  
55.6481366056639 46.8674366115656 49.1013967533186 49.2546642180676  
50.1833483241864 51.8083208406279 52.2256177934134 49.7363778831003  
45.6692241948108  
COL21A1 37.7384958256497 38.9338521051669 42.4580504587581  
37.0732977341185 38.4540849632254 44.5544727111028 43.9450023643394  
39.853866204927 41.7627910693483 42.0621425894624 44.9713479185144  
41.4508241771315  
COL22A1 78.0020909283414 114.796237914478 44.2405728317107  
63.0153175111747 51.0107745412152 43.7630587657205 40.2154497375715  
78.4815128101967 105.63434679637 147.673181207232 44.6286581923295  
55.3563533836982  
COL23A1 57.50915811428 46.1569135229922 46.8267540220952  
63.3006977162657 52.6922486991742 45.1873487463472 47.4439407315335  
49.085741080241 47.5564423692142 46.8954576545929 45.5707650534259  
43.6753843488695  
COL24A1 68.9745034946434 55.2182004838121 52.3432130135266  
63.0153175111747 51.1368583672022 57.2767879969284 45.3597029614942  
59.7744650739434 41.9635525160083 53.3059058105836 73.7873098190297  
49.7336769474446

COL25A1 38.1169703906207 38.6807508413673 36.0674080694129  
38.5855564939014 37.7576900881741 37.0180934800573 38.1154766911051  
39.4134201808101 39.0470836345045 39.4710743516517 34.6814739995051  
37.3600014814388

COL27A1 50.315768338317 112.944044862693 55.4502804236424  
48.1662933382789 48.6224651100733 50.8533737532786 50.6774883370457  
50.628152951493 48.6494451061637 42.0621425894624 49.2206713037152  
49.2064066614865

COL28 42.6036491382658 38.7344853699576 42.2577689927563 41.3027031037343  
42.7982502551634 35.4142595025086 41.706879587091 42.8482181313226  
35.9645119596869 48.3693338695392 39.7342718293432 44.4475838947656

COL2A1 39.5676051939342 41.3277288245157 40.7620472083159  
39.5050383901884 38.1644569189523 47.417512242919 44.3440839686558  
44.7044140979108 40.4220196471124 42.8936990772838 44.553780984244  
39.3789825717286

COL3A1 9488.06491634484 1252.94510628089 934.48498309932  
2992.62035058532 3043.12489526581 1083.50383916482 156.061711961514  
1110.39060103557 192.216758313982 661.880230068693 451.603052501528  
495.453743436613

COL4A1 1526.94101719128 1173.47285626656 1649.78627644882  
1285.49870339222 1335.4111951034 851.813216452015 245.194730981772  
539.188951045594 232.147792636393 488.183286350725 396.167219131922  
756.801598119483

COL4A2 163.126491735808 152.36389833079 210.958578914607  
170.184914156265 138.032032026715 217.658421476562 64.4736987797413  
87.9468208580228 55.3122077514658 91.4684013366068 143.357170805323  
142.680436288759

COL4A3 40.5654775358427 41.7614975630362 42.4890076400051  
47.9915414951747 41.1507980856436 44.9370339275041 51.2318935933116  
47.7508139534968 41.5635499110307 44.0719548209593 44.4688999098904  
42.9887069977696

COL4A3BP 79.953657052127 103.569150754726 120.582525405708  
192.058030454066 73.9456720099807 105.814959179397 96.0539709962851  
171.957278903005 80.0113001016496 174.469283513638 203.109765192983  
129.938114164087

COL4A4 38.304249186058 34.0382693188794 34.806104801006  
39.3750969348308 38.2496050953547 46.8954576545929 39.1539892144371  
41.2551966132486 40.4220196471124 39.4710743516517 46.8954576545929  
42.357910063876

COL4A5 118.143444770806 113.102823481296 497.591040004541  
66.5010880718463 561.855286945959 467.764770176415 94.9808934532248  
202.627009037401 549.117045813593 868.899376368472 631.110081413363  
753.491584605447

COL4A6 37.8891397738265 51.5822637582617 95.3300728806601  
51.4968903591058 185.165420581989 148.42234459694 50.6774883370457  
51.1334099137617 119.512426152446 127.741016067967 133.487946450906  
149.515611848932

COL5A1 2113.73880184695 353.213447404132 228.134171304754  
466.454993547103 553.094571132092 387.999689038448 55.2088411137193  
235.544416908354 70.5699797830702 165.42634596698 176.687970262952  
137.438636654385

COL5A2 2559.659041589 318.920760335454 223.801865347687  
928.230419226078 529.650395907046 308.568617575909 68.673864919178

286.927016665685 121.449647909665 223.669853276931 156.95090716929  
155.928417606775  
COL5A3 65.9273663561152 42.3550738181144 34.5718473203083  
61.8997157694697 39.7568367479301 48.9826868640753 37.830876898596  
42.5435283762933 36.197424053556 44.6918600441328 39.5399188536544  
41.863927676552  
COL6A1 2337.7738990994 359.733786489623 206.791464145857  
763.947361966861 410.257694738546 1242.75259587926 75.8779316255794  
392.622487173359 95.65872032796 953.143041145545 894.486674059951  
481.145001682177  
COL6A2 924.316085565917 201.977265056102 159.76714232068  
366.129480083279 242.631544185516 826.490051619826 46.7704450730477  
163.742560819575 53.0357938671646 410.623529765253 462.762837284748  
225.618853905635  
COL6A3 5601.18872540083 526.750242877914 303.670126704469  
1557.42399344934 1099.52344340557 1676.22158135012 83.8811735017279  
1618.92099084622 147.023857419777 1342.10592868516 895.735191953679  
569.244038644604  
COL7A1 667.583623414832 1123.99110499679 2733.80542760533  
982.428740433235 911.661341702443 121.682085315899 310.120875196999  
436.497820504526 1174.92419086759 190.27040993548 247.47601939651  
135.824520574227  
COL8A1 260.964562714558 114.674541610026 79.4053001255904  
204.502683458676 208.410194427484 84.8808332740321 45.0241191707651  
214.03015073442 51.7549258776884 82.743286503787 156.311985997533  
70.3629652777935  
COL8A2 222.126944340681 67.2649356062263 54.7350451926204  
117.439175394651 54.2683296643972 116.793627324217 57.8870110456492  
86.6586095017998 58.0139597055449 98.6039579639704 80.7986033188909  
92.8280881907307  
COL9A1 36.321475353804 39.8455060654531 41.0718387273629  
40.7481155008596 42.6022652963326 37.7427315853995 38.4456289125816  
39.3113207075992 40.7847110517594 39.1832968442811 40.4960693332473  
36.3916581215097  
COL9A2 87.4335749014848 161.205086002542 167.229755109155  
100.001150612051 127.908440924429 113.090530993447 191.09175268141  
131.39588569388 205.55797140415 296.176349059192 186.002828997122  
207.741669973713  
COL9A3 43.4626049853157 41.0678614026819 46.8267540220952  
35.9521941716188 44.3557408297309 46.0364000143537 38.941855825269  
43.0390857698452 46.9739160257217 42.0621425894624 40.547835538778  
43.1805016690297  
COLEC10 42.0532901689036 41.554942319225 44.8872784170036  
34.7266486944713 42.3685136297603 42.6575535390785 45.3597029614942  
39.9576138799997 40.3316153483289 38.4187686307607 42.6366765186182  
45.4799270968969  
COLEC11 39.0325254636537 45.7317208802318 40.0998167098057  
40.0195349109823 66.1650385535549 60.1756087584664 38.8732216254738  
38.9207612933107 41.7117861328546 45.731442524732 54.9765783642973  
43.6285248402465  
COLEC12 210.667709831149 68.4278345554565 64.0759817636265  
127.596368103014 58.6481644777552 358.979854534484 48.8319884367456  
61.130286531713 41.6616444147804 120.19033659661 121.449647909665  
117.260454792593



COLQ 46.6701649454386 47.8947595316832 48.1997158668729 52.6947911480086  
46.1513019317765 46.3203995372658 43.2721716572958 57.6336931026499  
43.0990926708606 51.2952403053335 52.7817052791259 46.5797464401782  
COMMD1 399.410299413602 230.927097824131 354.861943266984  
435.325038193179 256.258779434769 314.609371608151 209.860757709908  
614.088027946471 392.008276951929 442.853589679801 334.016152807947  
367.685570437603  
COMMD10 142.840631375936 155.200138285298 177.80178351875  
177.27613997459 90.3041737295567 179.378838766172 87.6018870099686  
152.608998839745 188.582370265555 110.649342465555 127.634504077212  
198.623556176842  
COMMD2 159.306689057291 118.67727980117 130.703767898434  
94.3229189690855 197.205643078662 126.485649460666 222.40005420611  
146.426853713038 182.06733830953 98.8595497262968 106.527144354592  
144.348025939706  
COMMD3 717.997180920384 999.13039066242 1040.102982885  
1046.42391243532 820.147156401172 762.855719373733 874.419252731128  
602.441843384617 1139.81870068001 704.378495149104 628.403814060213  
949.278493776928  
COMMD4 323.780380243759 213.285274542564 153.711194034581  
233.294970051779 307.754078087321 145.170590045628 390.202312411165  
284.575587310164 243.06561740595 221.325534445978 185.312851727212  
150.709301569371  
COMMD5 177.779514321673 131.347995391441 98.0473811574767  
163.261867589623 84.4821163646146 91.6978282652998 96.8141712830545  
76.6389264422388 126.404988409795 100.188736523729 93.0801307192343  
78.0133696753253  
COMMD6 401.45848063233 445.016226732679 598.970109654466  
545.514314651238 556.417356025042 1097.92519921873 382.538365722661  
377.679662622526 556.728676214581 679.559864419351 689.738256133922  
1075.04105984319  
COMMD7 588.972273484465 889.638287212686 855.157599239267  
649.908096675489 605.970682363975 537.471287449696 970.379875059112  
1055.00793806075 1115.27580736237 1259.2978319548 1107.96086673001  
802.650020720921  
COMMD8 76.3933911546385 133.558028920419 111.227016020927  
139.554519110944 95.1131101630937 115.143810463938 97.2124452343726  
81.9218437790485 124.986782737446 64.5093306432163 78.806097512943  
117.823678167648  
COMMD9 139.712472369259 134.099684731177 184.123415143164  
223.826005691932 152.608998839745 124.22494803053 155.099281008688  
262.534449975056 154.752920877816 144.427680369554 127.811684080184  
127.694844372277  
COMP 973.363245512859 63.5932443357808 90.8831233784641 194.666769955149  
48.7288537840562 47.8636003588181 41.1507980856436 260.426488908824  
36.5393857306744 45.7911932481722 42.8263096141654 49.2064066614865  
COMT 619.950241162173 1271.62760896761 1506.33570635551 437.015713629277  
428.8440159628 363.324816966828 572.19538884395 646.791777335656  
660.295993198711 768.888528247493 708.839262759372 617.271611375695  
COMTD1 120.20612443357 132.84476910529 98.3240331951021  
64.6945454069792 93.6591201235745 70.5699797830702 168.91210897306  
99.8277095030346 363.002913525646 82.7229468743536 105.814959179397  
89.5687388187015

|        |                  |                  |                  |                  |
|--------|------------------|------------------|------------------|------------------|
| COP1   | 44.4639405506967 | 42.6939394537076 | 48.9944486068347 | 82.1437429222046 |
|        | 39.1087466732192 | 46.6397391251762 | 48.6395795163502 | 42.4580504587581 |
|        | 42.4784375889044 | 45.0155543555707 | 42.357910063876  | 44.0246886382298 |
| COPA   | 1250.15619347362 | 1081.97502255142 | 1194.10154988793 | 991.630429625437 |
|        | 1317.29255644089 | 938.151864971251 | 1537.76265834076 | 812.386878774445 |
|        | 2201.39729904166 | 638.848775860866 | 668.961646543849 | 770.715044136717 |
| COPB1  | 329.437593022939 | 411.254448823371 | 294.620463776036 | 474.729653426958 |
|        | 296.532363090593 | 367.451332073134 | 278.507764368929 | 355.04502859751  |
|        | 370.917477324773 | 282.802560118785 | 274.081959734368 | 414.293172794592 |
| COPB2  | 567.827069916244 | 570.997661726825 | 429.725397949276 | 539.32996290794  |
|        | 686.154904023493 | 451.13133250897  | 495.359878931451 | 423.254211470935 |
|        | 399.21864362319  | 218.217851814655 | 267.261896105785 | 355.351648424266 |
| COPE   | 467.884559162462 | 538.153124145211 | 510.379313524019 | 599.670771796585 |
|        | 640.407302868904 | 477.558242266308 | 500.672147150237 | 397.745727767552 |
|        | 581.396808977873 | 302.422475486532 | 373.626843592567 | 351.039814818516 |
| COPG   | 510.525676243746 | 335.330937634207 | 292.065366215278 | 400.760646547012 |
|        | 389.994289973076 | 252.870708814507 | 348.913213159222 | 399.536040890627 |
|        | 352.600793906035 | 281.262083731954 | 338.415128695208 | 277.014526407597 |
| COPG2  | 71.6849360818041 | 83.8850034281243 | 59.1040441894478 | 52.5307002738469 |
|        | 84.5572894783679 | 54.0382756991549 | 58.5087296620514 | 55.5578334877425 |
|        | 114.535461066963 | 82.475816811779  | 63.4323398447015 | 94.8717345601966 |
| COPB2  | 44.436995101921  | 45.8980298854198 | 44.3648993568405 | 43.7410507935043 |
|        | 45.9104478407175 | 51.5522731200852 | 46.4388841354122 | 45.1714698794331 |
|        | 49.8304479381623 | 47.0055981216687 | 44.4688999098904 | 46.9867599298218 |
| COPB3  | 357.254500791202 | 430.618167106529 | 410.623529765253 | 472.522115719366 |
|        | 482.5816387921   | 497.591040004541 | 511.527348356071 | 346.621778258188 |
|        | 440.282299601096 | 359.185856400148 | 362.268767190535 | 401.45848063233  |
| COPB4  | 175.028390974125 | 182.219366179899 | 261.6201598868   | 190.960237766104 |
|        | 177.958475301951 | 274.994470779348 | 156.917623325793 | 191.394143505573 |
|        | 179.629622763381 | 155.270252661048 | 165.942795019496 | 294.7772562683   |
| COPB5  | 810.382224368065 | 891.080174768895 | 535.449763420086 | 447.448900931272 |
|        | 715.662312404643 | 652.480459437977 | 557.717744882602 | 409.554706384667 |
|        | 952.16345035163  | 451.520414426616 | 444.738154053278 | 582.017297217368 |
| COPB6  | 160.702832529922 | 177.878878992191 | 217.575115287224 | 211.926421068313 |
|        | 214.127390534906 | 296.532363090593 | 204.490115029568 | 242.792365320043 |
|        | 258.789217436101 | 204.273912273411 | 217.848539722853 | 223.267781866783 |
| COPB7A | 451.437791473506 | 459.546279672649 | 837.959914510114 |                  |
|        | 359.465715235071 | 436.757445186987 | 409.978564041362 | 472.522115719366 |
|        | 689.483531595728 | 718.832367050609 | 659.666977039793 | 821.013687795434 |
|        | 590.139974503603 |                  |                  |                  |
| COPB7B | 190.570409327756 | 191.853798887866 | 227.567182783564 |                  |
|        | 149.260740603715 | 368.913147706435 | 175.619398238068 | 178.306763765612 |
|        | 237.809876921353 | 195.430996540859 | 237.039707901886 | 223.749512763927 |
|        | 190.81617208799  |                  |                  |                  |
| COPB8  | 103.252085427319 | 74.8893925448138 | 87.539553421006  | 88.1494891612632 |
|        | 72.2665537421443 | 128.300809076274 | 67.4421428140671 | 77.0703146713865 |
|        | 82.4164506744    | 77.0927030014721 | 81.0295607064541 | 99.4546022538476 |
| COPZ1  | 260.85727391155  | 324.320137371059 | 312.984737387254 | 271.206999109791 |
|        | 303.323289734056 | 328.46798329618  | 329.763197973922 | 473.223156200183 |
|        | 476.653723741096 | 322.509777895373 | 254.472291205905 | 319.954889553226 |
| COPZ2  | 99.3956523785983 | 48.8584917918986 | 47.0940613507321 | 92.8026641003757 |
|        | 51.0107745412152 | 127.115038236278 | 43.9450023643394 | 59.7744650739434 |
|        | 70.9462008788871 | 89.3989848564067 | 83.0072253231162 | 86.2118355769367 |

COQ10A 83.1614238528477 87.6763065012524 90.8831233784641  
 105.234356571498 88.9038123445083 121.236881661832 94.1289383735162  
 100.370937669662 111.643323610073 111.248876636045 90.807818984128  
 88.6771566133367  
 COQ10B 440.282299601096 563.065549077627 507.620619345969  
 705.283979182062 439.106576928682 609.797179957996 285.187681119318  
 371.393488010768 455.081394085527 346.285308869994 414.794323433931  
 550.861615347663  
 COQ2 315.276749671783 217.065944053174 198.788202490193 355.04502859751  
 264.88963894526 222.40005420611 228.439524702578 229.47693624489  
 292.389429869034 101.138003125297 143.84904170479 177.133999361532  
 COQ3 70.2541961995753 82.0237575809051 106.243765443714 73.0371862899659  
 98.9988668602468 86.915098846441 131.258204302177 107.576033955049  
 134.335592890814 125.393232344778 120.289145237975 132.684895918889  
 COQ5 273.807348011122 307.550936236018 295.127975044241 309.06234888929  
 178.156332261759 332.490954010208 294.7772562683 233.381378925304  
 528.242677613584 322.509777895373 296.39460008432 335.167786298149  
 COQ6 81.6647246398712 73.3270037834227 121.562769658314 66.0397471691747  
 85.3681894044625 91.8986731227209 80.882176929636 77.7615826856723  
 107.490296194878 109.758297200083 98.1835264890769 98.3733183587283  
 COQ7 49.3463416794995 68.2521461582047 66.5285423077808 46.614092935749  
 54.4586176399381 69.7677752398541 59.1774824918359 52.7787010032051  
 58.9056300364078 71.9124897002253 80.3500323413132 66.6841624416436  
 COQ9 368.727384734032 413.31638457585 730.168814097451 258.973633899103  
 240.731386634957 471.297503316471 455.444228161475 294.849830545881  
 609.520481504834 679.559864419351 530.996217072759 519.351335801817  
 CORIN 79.0304119352941 45.7317208802318 48.1997158668729 47.2009420656854  
 42.269054475455 50.4022543872993 39.0458123429605 71.7336217321663  
 40.137818555383 44.2580151149956 43.0016969050339 37.6557714476853  
 CORO1A 95.1513370156467 310.057823337984 172.237164781821  
 682.479411898549 99.4458090623294 153.279284223069 150.985239447761  
 158.613823276652 58.2401724760744 77.6056319020116 94.9001252449925  
 74.5886835786452  
 CORO1B 207.380865650247 415.05124917015 490.652353306749  
 272.36028618845 337.363827785838 192.318724749487 429.576301511638  
 198.129308943666 314.782545392841 243.843941346211 244.736442646499  
 204.659954879641  
 CORO1C 199.937572174194 101.882591864061 133.47090252916  
 303.670126704469 125.62281563325 478.296779356592 124.44575078108  
 140.698550434486 165.662539866309 317.835330028579 271.813877560354  
 354.973265582488  
 CORO2A 78.2644076847509 239.385229462309 209.967057706137  
 55.3141112947345 101.065203693106 57.6511495792664 172.95999061341  
 146.789051265805 203.228211195516 126.897002134472 143.773311381452  
 244.070778149931  
 CORO2B 52.1788489555942 41.2262949117288 44.9758339877851  
 42.357910063876 43.5836473788312 55.2515150764173 43.7585538437696  
 50.8160430472218 40.2615278292875 62.3233491851723 64.0948886658997  
 50.0159415986047  
 CORO6 69.0975200641705 40.3384318592985 40.5734458834617 44.7980740332174  
 47.5647821785529 82.9449579428926 48.6395795163502 47.0940613507321  
 44.5303781239209 90.6805895192707 86.2670415958076 59.5080588072694

CORO7 98.8719561245756 130.691004726616 123.597489107285 202.983984966874  
94.1575209300592 103.139459009593 122.720768249799 103.631449539809  
102.706563820232 99.548445157506 107.840833498938 68.4278345554565  
CORT 47.0940613507321 40.9731067463382 43.1931731665131 40.3180310664156  
48.2748123114598 46.1513019317765 40.4359177791566 43.5544347011646  
45.4799270968969 42.1622837416589 35.4386677371439 41.9430737035925  
COTL1 35.3227485563945 43.5182502375207 40.931294690669 42.9358255168086  
37.0526522140242 37.2686490268265 46.4388841354122 35.7973685350741  
38.5252456306656 34.9138625012006 39.153226699662 38.5279745308203  
COX10 153.767031974664 294.51382100172 226.785831708938 175.271140689255  
308.025419469334 173.745808259419 265.570814613305 144.079981029616  
228.254228465645 258.973633899103 212.803471204964 238.246319539302  
COX11 48.8333989709933 53.5281825103894 42.2577689927563 44.0451487108213  
50.2163892855092 52.4351670989268 44.2166118829877 50.7364620410977  
58.9870089759222 52.3304586399695 53.0798381965427 57.0524725494273  
COX11P 42.2618615571566 39.0102066700839 41.6550823405646  
41.0219290963778 39.7210115145672 48.3686935595826 48.739479557328  
40.047314525032 46.2027193115397 38.7008388965825 38.2293008890613  
39.3789825717286  
COX15 73.4331096065698 70.4233710555202 76.2945357381722 95.8590592250688  
84.0996028277101 88.9738853594498 99.7529382840954 79.0373265781543  
81.2136969156029 112.17141283151 110.540953771795 97.6552689677199  
COX17 1012.91803181784 1231.77360353254 1016.13142851085 1114.15989325456  
1182.10714525377 1126.31998762007 1529.52516575545 1180.7204565402  
1110.39060103557 502.557430906865 733.358170858378 1050.05355467301  
COX18 44.5798743103596 43.896638326678 44.2733573199954 45.334106390212  
45.1899271235974 46.263826584899 49.1067959632109 44.0390019242862  
42.7150227340364 46.3810615657263 46.5650556481721 46.1592873342534  
COX19 137.843308428621 101.759714275976 108.928854330744 117.699959435983  
140.076084766156 77.9085946827079 80.0733119200914 163.261867589623  
98.2512963929558 310.821299796803 206.234676343851 172.698530496379  
COX4I1 5776.17749026501 5733.54417656207 7627.46814033012  
4597.60989502097 4550.56817942699 4381.51418239047 8144.52133665388  
4597.60989502097 7980.71309230447 6258.22561934986 6673.00322263275  
5566.52516420571  
COX4I2 58.8224410806741 71.5249259772583 66.1541420734416  
44.550322123994 63.686652234709 65.3096524773304 46.1634822993009  
59.8760452220989 47.3791873993182 45.1569741609597 56.4873776344986  
46.917149434588  
COX4NB 85.9970657980042 70.2553917409773 97.1271615802556  
84.0899854321388 94.4129246851651 102.020047144427 137.547711779867  
56.8094693588238 115.63300104804 76.5375674421131 83.6610321130843  
71.1595608255838  
COX5A 1383.53136710469 2096.51999792183 1027.05274681749 1191.01873119866  
2225.65559724391 1184.75786736273 2581.34849558524 1611.35913846618  
1842.15643221012 1019.67015337432 1110.39060103557 1554.42895572029  
COX5B 1776.78784112613 2067.66516256598 2465.65854657837 1493.20520979227  
2108.03351084959 2771.14077845128 1985.3999418878 2108.03351084959  
2992.62035058532 1347.15664445545 1756.86714809925 2096.51999792183  
COX6A1 559.9670724278 670.958499409833 723.853348464335  
523.25106120389 562.798580332885 603.737787922337 853.117321142008  
589.685739519627 1249.41227924272 457.202737754842 495.705224781189  
630.150754732971

COX6A2 40.2543341073001 34.6306468196142 41.2365089689635  
38.3166554965434 40.9950639693255 38.1169703906207 39.2533668167483  
43.4544762830742 34.6720534245631 41.5435611403119 38.4689132737495  
40.0557788909923  
COX6B1 1789.07186722972 1533.38581753491 1999.21832626916  
1408.59798540643 2248.64628069362 1428.47642890543 2854.82112538867  
3088.44063817936 3234.36469403715 1466.88103496067 1436.67510926345  
1817.14004766564  
COX6B2 39.4710743516517 41.0678614026819 43.401782064778  
44.550322123994 45.1137938810047 44.4619248757502 42.9803717121865  
44.5658219748173 46.8873421271259 43.4885245598939 40.4504608195666  
44.0246886382298  
COX6BP1 47.5647821785529 45.9266745571724 48.4890615340603  
42.2496337895968 42.7982502551634 39.2985791324641 45.4799270968969  
47.5950227477807 49.3780606970538 40.6022003765153 43.5710871617107  
42.8864415494484  
COX6C 3263.05269150231 2854.82112538867 2178.59848996529 1963.91365010531  
3800.19142219719 2506.05102956991 4328.723715755 2150.8715161597  
3562.96193568469 2417.02418518222 2160.22713775462 2280.42953098693  
COX7A1 210.880198736298 96.0838701986116 169.194312808717  
230.664926508522 112.100074154279 1134.52018899688 47.1345949868029  
101.272774711455 53.6446045619513 736.405815842011 615.838713743621  
551.490493022416  
COX7A2 1829.30985071028 2201.39729904166 2184.70038900784  
2108.03351084959 1776.78784112613 1839.09068171097 2272.91548405176  
2160.22713775462 1999.21832626916 1509.04753111016 1182.10714525377  
2892.02001412369  
COX7B 239.96421556928 250.959527806799 316.419421649196 339.854688605186  
249.729778471447 360.668308246913 335.002151198999 646.323419285676  
680.279119780451 315.186937216422 307.922754395377 542.069156178791  
COX7B2 38.957687788868 40.148780650831 41.528370959196  
36.0481934423077 51.2525124735102 45.6129956328415 36.5352572191451  
41.8417024632349 543.640122689871 38.8507804383261 44.7926323492519  
41.5536168238478  
COX7C 2934.35616793443 3776.54943917367 4617.45430247751 3153.71394627237  
3592.44409869527 4550.56817942699 2640.06306087033 4820.70258471362  
5811.22276358172 3854.42494497831 4200.38495514552 5895.03230740197  
COX8A 1144.34555072807 2733.80542760533 2672.94421680196 1850.06063216244  
4328.723715755 2374.1766901821 3391.65926812276 2237.08790397818  
3124.84336032646 1307.19925493293 1683.24873205783 1835.21901524331  
COX8C 39.3709357615493 40.5400384479766 43.1931731665131 41.6564075217517  
42.269054475455 35.9305494063137 47.1345949868029 41.3506832276112  
37.9273653326866 39.8873706855774 45.8180710486329 41.1554481567603  
CP 45.5758521267508 45.0905928998779 66.288032400574 46.3203995372658  
42.1650127805175 42.750861693377 43.0930293831497 49.085741080241  
85.7842344710572 42.0621425894624 40.723990462047 45.1735152121056  
CP110 131.645714321903 157.615972646659 145.14768503072 114.224091812993  
176.397140445822 170.475212920685 254.983975710833 184.964039515715  
147.023857419777 151.451107406752 161.439879456216 177.845412804098  
CPA1 41.3387790895716 32.5482839399637 39.1799070031819 44.7980740332174  
37.1565984182084 45.7300501624017 34.0777108441756 36.3405039629059  
38.6322728994674 36.3612409063792 40.723990462047 42.2577689927563

|        |                  |                  |                  |                  |
|--------|------------------|------------------|------------------|------------------|
| CPA2   | 42.442231667357  | 43.8495248991589 | 40.4882741869718 | 42.4580504587581 |
|        | 39.859345745831  | 43.3785777889265 | 40.7910160811527 | 41.1575777497576 |
|        | 39.3750969348308 | 43.0919221375514 | 39.6403089864678 | 42.1537476443423 |
| CPA3   | 93.3605294458382 | 76.4439037944547 | 58.5212649095879 | 176.816741656659 |
|        | 47.2074332636566 | 814.294297312057 | 45.8980298854198 | 62.6386437936516 |
|        | 41.6616444147804 | 186.965367827758 | 127.863441809606 | 145.509901200987 |
| CPA4   | 39.266565827316  | 41.6466169548846 | 81.4931910857436 | 39.2780515621926 |
|        | 48.6224651100733 | 42.5660695551615 | 35.8227939208521 | 52.7787010032051 |
|        | 43.4656637536244 | 42.8936990772838 | 43.5710871617107 | 43.2776458914333 |
| CPA5   | 43.5710871617107 | 45.3486182278177 | 39.4710743516517 | 37.29566077996   |
|        | 35.9058393060637 | 42.2577689927563 | 38.5066108855005 | 37.2237132058632 |
|        | 44.2607789091176 | 43.7303813515864 | 37.4642807402741 | 46.3411353377615 |
| CPA6   | 29.9775071862804 | 41.8073910693411 | 36.2683886571585 | 38.3166554965434 |
|        | 37.4470183315826 | 35.0970060242246 | 36.3194282084339 | 37.86982638952   |
|        | 39.9444191873552 | 40.1179210534118 | 48.6184776976167 | 46.5650556481721 |
| CPAMD8 | 35.0202257459026 | 33.5924201549249 | 42.157627240486  |                  |
|        | 42.4580504587581 | 39.0564222526273 | 41.2567470068038 | 40.4359177791566 |
|        | 47.9942520395434 | 35.9645119596869 | 49.7259371799014 | 45.9104478407175 |
|        | 46.2625470410195 |                  |                  |                  |
| CPB1   | 37.1485601150873 | 39.0894172982439 | 41.6079958749402 | 36.890925044696  |
|        | 37.956732373465  | 52.7156971154405 | 35.7055410599146 | 38.3684202018524 |
|        | 33.802253812079  | 34.6720534245631 | 37.6484782516569 | 37.8490162439785 |
| CPB2   | 40.604930211629  | 39.9311316520751 | 42.5406888281114 | 40.2563544693508 |
|        | 43.1892285249551 | 37.8414621798121 | 40.2154497375715 | 41.2040352443154 |
|        | 41.074824727477  | 40.9607305725196 | 39.0775870687758 | 38.9891430655409 |
| CPD    | 411.73316510051  | 234.615033303459 | 315.487514440864 | 514.261598258395 |
|        | 287.494740260715 | 280.526935074437 | 271.138311888031 | 262.37779288036  |
|        | 518.527535205975 | 398.229956085523 | 402.794855141389 | 389.583938820073 |
| CPE    | 88.2427413480277 | 60.6080172588224 | 66.737740728688  | 66.224559122062  |
|        | 53.5594683028749 | 84.2728210732532 | 44.8643898647322 | 66.5234828659154 |
|        | 82.3364971911816 | 96.577572948724  | 98.8922486048877 | 94.4769283676944 |
| CPEB1  | 45.2875173643252 | 41.6003109209356 | 41.6977706798234 | 40.0195349109823 |
|        | 38.8775560911841 | 66.0516224379323 | 39.9397419279057 | 38.745552403895  |
|        | 41.1367478979484 | 50.1059857872211 | 53.3325829174829 | 46.2961166449607 |
| CPEB2  | 51.1375316857287 | 52.0268699306396 | 53.4088637045445 | 61.0069245485604 |
|        | 44.4489662507893 | 80.0042268333735 | 43.0269218496197 | 60.7488007939604 |
|        | 47.7086093893038 | 64.7269156363245 | 71.3932787152381 | 84.8808332740321 |
| CPEB3  | 55.8709511400674 | 56.3560498705517 | 65.4137646609535 | 107.242476674629 |
|        | 48.87875862356   | 98.2843999216669 | 58.5588286084726 | 82.8218647837178 |
|        | 64.7450441264824 | 132.959812230068 | 126.204310123186 | 86.0832675838966 |
| CPEB4  | 53.3967242431461 | 53.812632592983  | 52.9111155236961 | 93.4853597306163 |
|        | 49.7235523248653 | 75.8976034525022 | 41.8315602975157 | 46.3685439301234 |
|        | 52.8502823653368 | 42.0621425894624 | 45.310660704531  | 59.987045425047  |
| CPLX1  | 44.9896851005259 | 60.4646208319121 | 70.8606919488782 | 69.5544840164738 |
|        | 96.8490167966217 | 57.4777075615651 | 45.8980298854198 | 47.9942520395434 |
|        | 46.6944238390932 | 44.0409178714232 | 52.902043370862  | 42.0424641526302 |
| CPLX2  | 38.8322787989855 | 38.9338521051669 | 41.0752399035779 | 41.353786352147  |
|        | 37.9058271053655 | 41.3177250076876 | 36.3194282084339 | 40.1985790927248 |
|        | 41.1742244762318 | 39.7453420559776 | 41.231791494452  | 40.6134262962375 |
| CPLX3  | 38.5007204246293 | 36.6968906669565 | 35.2838283525874 | 33.9645433044281 |
|        | 35.3327761997046 | 36.8059561571675 | 44.2166118829877 | 40.6171774724171 |
|        | 39.4762546236449 | 35.6208308220005 | 33.8558232866797 | 35.5523662009011 |

|       |                  |                  |                  |                  |
|-------|------------------|------------------|------------------|------------------|
| CPLX4 | 41.2424637338424 | 41.0678614026819 | 39.6451483836089 | 43.074472921841  |
|       | 39.4693871570028 | 45.7300501624017 | 37.7136011474903 | 42.357910063876  |
|       | 44.7058233759912 | 44.1379638573455 | 41.4508241771315 | 43.7672102682067 |
| CPM   | 56.7868634876032 | 51.4240355732132 | 50.1860191642359 | 59.0965219753805 |
|       | 48.2129341876251 | 47.2505395290129 | 50.6006409539328 | 64.4707714725499 |
|       | 48.8067321016961 | 46.614092935749  | 49.6314545328943 | 48.4869909888679 |
| CPN1  | 34.8099089553046 | 41.9894412416874 | 43.4709415392696 | 39.853175885492  |
|       | 41.467005949568  | 45.6129956328415 | 38.6243997507646 | 54.6067620335514 |
|       | 39.5806465938526 | 38.2069499294002 | 44.2142581488029 | 45.6692241948108 |
| CPN2  | 41.0970259989281 | 39.6995529770239 | 44.1452943804044 | 46.8954576545929 |
|       | 42.3685136297603 | 42.4155142987678 | 42.4939802311136 | 40.1474543172332 |
|       | 43.6670755115848 | 47.0797760763156 | 45.5707650534259 | 43.5738557773903 |
| CPNE1 | 172.237164781821 | 170.87055409699  | 174.559216176175 | 116.547937420457 |
|       | 228.254228465645 | 142.789889238338 | 197.895987726243 | 133.11655169884  |
|       | 109.922909644299 | 228.571334092678 | 226.785831708938 | 87.8505898087072 |
| CPNE2 | 49.2595762436995 | 49.4982025424177 | 50.0748292497578 | 45.4634652319753 |
|       | 45.1137938810047 | 51.8103411703261 | 59.9792284253187 | 47.6952179922944 |
|       | 53.9287524861617 | 44.7958122466628 | 43.4709415392696 | 46.4499258373233 |
| CPNE3 | 1139.81870068001 | 1707.92349760322 | 987.427672417105 | 530.996217072759 |
|       | 1963.91365010531 | 1125.31394383117 | 917.631567606105 | 588.247843264181 |
|       | 990.431472174705 | 872.305108096296 | 949.278493776928 | 947.656220635965 |
| CPNE4 | 40.8681871019812 | 46.29198852834   | 50.0050760710506 | 35.6027791404152 |
|       | 49.8304479381623 | 43.9724628401189 | 40.4359177791566 | 50.3082459161777 |
|       | 49.641159251878  | 39.4710743516517 | 38.4689132737495 | 35.9604262434141 |
| CPNE5 | 42.6036491382658 | 50.6229884142872 | 49.6347864008749 | 80.4007868743886 |
|       | 41.467005949568  | 44.6524308640784 | 41.253645578517  | 41.8417024632349 |
|       | 39.9444191873552 | 36.5806287103157 | 35.5179217192467 | 39.5418280570561 |
| CPNE6 | 40.9558083259517 | 39.8695929627783 | 50.2869791217819 | 46.0228732507872 |
|       | 40.148780650831  | 58.1798515131249 | 43.3262148375525 | 41.9315419791594 |
|       | 38.3418933808844 | 42.5664883002833 | 47.7535797917441 | 43.1805016690297 |
| CPNE7 | 41.8767957887205 | 40.6695495527761 | 40.9856185999216 | 42.8742421276144 |
|       | 43.9869272640159 | 41.4508241771315 | 42.006843375895  | 40.6783687486496 |
|       | 42.2319133247744 | 36.5377349417874 | 39.9648352258645 | 40.0164662097472 |
| CPNE8 | 73.0970339739187 | 51.4413099192899 | 53.7316344826448 | 115.913030448537 |
|       | 48.1986674201502 | 112.721024337362 | 44.2166118829877 | 58.5406981871153 |
|       | 111.501058276821 | 111.97030382494  | 100.499763255098 | 141.572530741416 |
| CPNE9 | 39.9697332660833 | 37.4540772310118 | 34.5718473203083 | 38.5252456306656 |
|       | 33.3231576795423 | 39.132725377815  | 51.0013344286851 | 36.5393857306744 |
|       | 39.2809305246091 | 38.957687788868  | 41.2598458726002 | 34.4570158133896 |
| CPO   | 41.1523487516364 | 42.1607322031054 | 35.9305494063137 | 39.7411455670172 |
|       | 42.6022652963326 | 41.7627910693483 | 35.9058393060637 | 37.7612949798895 |
|       | 44.8997235283254 | 40.8970401536578 | 42.911855821602  | 41.7575097298927 |
| CPS1  | 49.6241203903354 | 39.3999056968598 | 44.2405728317107 | 44.265834798964  |
|       | 44.2607789091176 | 58.8605811695948 | 39.3585350448719 | 43.0390857698452 |
|       | 127.596368103014 | 57.2813205536176 | 51.4413099192899 | 39.6352613956998 |
| CPSF1 | 271.961673480206 | 250.176074707634 | 235.682605856428 | 138.336991036544 |
|       | 377.491895827114 | 157.020685801527 | 216.004059887037 | 120.660602388292 |
|       | 184.048982286364 | 190.977045076469 | 139.796374175417 | 153.237127853072 |
| CPSF2 | 142.933216800073 | 101.681822254799 | 143.706880936186 | 99.1438953564062 |
|       | 142.309369995384 | 125.364451149941 | 126.826715174564 | 92.227126770051  |
|       | 178.858202962948 | 133.893108529325 | 159.667153030627 | 120.571680725698 |
| CPSF3 | 601.829364668202 | 252.649651285136 | 309.994784298282 | 317.325808319372 |
|       | 448.446274966018 | 224.635749257133 | 648.885062676884 | 1017.1803754111  |
|       | 312.045709918301 | 243.489225650886 | 245.730139853029 | 297.950627905767 |

CPSF3L 89.4747568145717 105.515662220161 97.2615918872914  
 80.0814445394033 138.728648830528 93.7924763988692 113.430943555215  
 104.089998273812 110.626479311082 118.854313907627 119.434418653131  
 96.4913003384143  
 CPSF4 414.062259640915 280.402165030951 306.895449954881 195.765247956108  
 528.840700144811 244.736442646499 355.92328557644 384.919835924792  
 515.409979010663 332.137622104526 293.702642091269 267.85990321012  
 CPSF6 49.7188990489616 56.6927078228789 57.6371756925687 42.9358255168086  
 73.0433648756396 46.7800033479223 60.2399886747451 60.419911425109  
 60.0736861987141 61.9882398986333 52.902043370862 64.531467526747  
 CPT1A 50.1533437545239 51.7676177022233 45.1846041469628 51.5913529948887  
 52.9433495155796 51.340484930067 50.9160746031872 47.8277364640334  
 49.2879849674517 46.9711270147079 50.8485682149772 53.9918882088235  
 CPT1B 53.5643281930979 79.7061415085215 65.7002710293248 61.1630754250653  
 67.9531693869426 54.0969604236265 57.4047331041592 74.7127063822938  
 62.275808835675 69.3468840908665 76.4389426517528 63.8558858499025  
 CPT1C 69.4501305462809 50.8812920005251 46.8267540220952 66.5921967967793  
 173.18824792041 63.2343637481705 49.2546642180676 84.8569316561572  
 52.0583273941813 54.4825201506931 60.2867996701867 55.6351010690528  
 CPT2 327.631923082696 415.364456363434 368.972794063004 192.264432082651  
 264.495576211074 122.15017220566 311.301613620475 201.163076338483  
 227.535855856645 212.152751915521 245.585026913915 271.138311888031  
 CPVL 249.246628143531 169.168332370229 109.659686701319 925.486088550061  
 103.530430972911 631.110081413363 169.790843803064 160.171133984141  
 93.3718038663074 190.214361156876 97.8389686233842 105.63434679637  
 CPXCR1 42.7613994022988 44.3529919625344 41.6977706798234  
 38.5252456306656 43.844855336215 40.7616966228404 46.6267962186599  
 41.3012916486748 42.846832824953 40.1179210534118 40.8681871019812  
 42.1860813954352  
 CPXM1 240.841214170409 59.1938299291358 45.8844325913247 148.059385111127  
 60.4122350478242 121.969082013079 39.0458123429605 60.0835531094681  
 41.9635525160083 54.2830238965339 49.1868644496737 57.934622029119  
 CPXM2 144.799432299339 98.0023132593711 79.0962508551502 207.957319374194  
 73.3533274030352 574.847203528544 53.7423898357583 79.2701322339022  
 49.9162522057712 238.338646661062 217.263889616995 431.727858902449  
 CPZ 81.2992152187529 53.8909465631671 56.6888826857797 69.2685201884906  
 82.4164506744 102.322851896214 48.6395795163502 54.629382710848  
 44.8681974656149 78.3186115281795 65.088713927995 47.4713070963518  
 CR1 41.5635499110307 41.0212349917651 40.6210258686042 65.4068498877665  
 39.4141123790339 44.7022992640631 42.6995880296584 40.9861485852278  
 38.2981083038519 39.3866822630357 38.3684202018524 39.4830039788612  
 CR2 38.4344387289957 49.7827734675743 40.5289532121417 112.17141283151  
 38.745552403895 39.779935291659 40.0052661202207 42.6008809597607  
 42.0621425894624 43.3438593008468 40.7670908011804 41.6550823405646  
 CRABP1 36.1232327599945 40.0527893189096 40.4070046183108  
 40.1804147506786 57.5685357492202 45.3882138838137 50.8388984085636  
 70.7805103907761 45.3756389170606 41.8613406887824 49.0361180089431  
 38.2350720635382  
 CRABP2 1490.1549980903 97.3813557754832 1418.94307844471  
 123.841740274811 1442.72006787259 326.70962514228 1126.31998762007  
 1351.49940447914 1858.94179312821 305.786520619504 282.445037659981  
 288.816567137193



CRADD 77.4999637278723 132.730723037077 134.952392466784 208.7739716139  
 80.6200293361016 127.115038236278 133.877825732645 89.9227845135785  
 183.336550845401 109.326279686847 121.195506364658 137.034037711549  
 CRAMP1L 127.694844372277 180.255771684507 246.820301517765  
 102.786429761295 136.504157082236 122.405413080836 123.561242462957  
 80.9092480872499 94.2275161759277 129.272985305607 135.490875023792  
 115.441414762268  
 CRAT 66.979105340228 74.0614295574729 58.9135553403521 45.5869891570251  
 53.4751250621694 69.2001494999588 123.608921653229 102.926945888985  
 70.7003843117511 69.5853093594169 73.2234405348435 57.4844872128664  
 CRB1 39.4710743516517 44.4639405506967 39.6833800000587 43.0016969050339  
 40.5235471987417 37.4782441311626 43.4544762830742 40.0965255448873  
 40.0870341983328 42.7275315121163 40.1742127891824 39.4830039788612  
 CRB2 39.5676051939342 43.9421822132391 44.9758339877851 43.4410741327254  
 41.2740822675592 34.0777108441756 37.9430145836712 42.157627240486  
 40.4220196471124 41.9666541498638 39.5399188536544 41.5536168238478  
 CRB3 189.015214517448 297.662970257144 184.235914591152 53.1249776278067  
 291.086512261106 80.099836448859 280.275836993258 192.264432082651  
 239.229093340475 131.319040057576 113.322929203297 97.0589984189239  
 CRBN 132.684895918889 209.931773196136 195.672836308456 210.38953368311  
 165.411942074375 406.417924060562 162.735117558467 246.869486382264  
 164.146682514925 238.510952165358 196.267504470029 217.065944053174  
 CRCT1 40.8681871019812 99.9752275166514 101.2615980834 69.6511571901941  
 44.8897737954573 49.1013967533186 45.6042625176633 61.9787117490846  
 42.1594905198929 45.1569741609597 42.4580504587581 44.1452943804044  
 CREB1 2733.80542760533 1459.69929955338 1796.47241860175 1939.66920192372  
 1201.00042684883 865.63777294494 1945.33618761041 3234.36469403715  
 1087.75682788799 2878.82618761804 2721.97551918611 1975.28674300761  
 CREB3 48.5835484742456 41.9894412416874 46.2625470410195 40.1804147506786  
 46.1804647841331 43.7630587657205 45.4799270968969 50.5070012045444  
 45.2897806651929 43.4885245598939 48.2050207071554 52.1186591838715  
 CREB3L1 40.148780650831 43.3458769998118 43.5710871617107  
 42.8235313007746 38.0598374201407 40.5281496800812 44.9863726205428  
 47.5950227477807 40.8970401536578 44.6918600441328 46.0905079010237  
 36.449101775775  
 CREB3L2 784.951880532127 683.099079617304 487.261132702908  
 936.978983469829 351.700618429121 347.196922795214 282.646286144563  
 738.059797123491 291.42149037871 378.964387825252 380.736562250846  
 389.364650157102  
 CREB3L3 41.6354649482853 32.2892762042267 41.2365089689635  
 45.0798408927912 38.3561682218911 36.6996187567892 36.8369172900902  
 40.931294690669 34.5633623842083 42.2614524730856 34.3633615460307  
 34.806104801006  
 CREB3L4 52.502055890816 53.4109882045447 41.785676764591  
 38.2041059863839 40.5710637884029 44.5544727111028 62.6885730386156  
 56.2441895183416 52.4539007817929 48.0211752672327 46.7386599624801  
 51.3244198342335  
 CREB5 43.120110422996 42.1607322031054 43.3427991470083 77.6049044026375  
 41.4307783284114 60.6481332392553 44.3977035913759 45.7995623076688  
 38.1679953604288 44.298892175909 46.3715909653832 53.6895401581575  
 CREBBP 155.378768637562 159.046483157634 190.099949303905  
 190.099949303905 151.255948388415 146.87603018486 118.67727980117  
 110.487281983469 187.147252401703 187.331614826395 195.864827360933  
 164.122105098254

CREBL1 41.2424637338424 45.0115870036541 40.4070046183108  
39.2780515621926 42.7982502551634 43.6670755115848 43.1931731665131  
48.6441988290952 40.0403898620771 40.6022003765153 45.5707650534259  
48.6795178347248

CREBL2 41.5421429082231 42.2577689927563 42.5406888281114  
40.8681871019812 37.1565984182084 37.9003288112261 32.6530576979948  
42.6450179841129 36.9060997041453 49.1928206164702 40.9157352260901  
35.1451084093692

CREBZF 69.7442393277127 101.940584589951 89.2285288333749  
56.7927450229377 136.04447103201 62.0660509811111 95.6697427870979  
81.2850357499192 92.1817062395346 60.2877434874622 81.4702220063796  
89.5687388187015

CREG1 307.264133974364 576.140066807763 484.050852319927 1086.12171444149  
668.584452504579 958.473187253938 389.686780706341 231.154569340492  
323.705254926762 560.413725186282 489.622327794168 812.814329906663

CREG2 44.9896851005259 36.6968906669565 47.4740726032707 45.4634652319753  
37.6527901109005 37.1317006162938 37.7136011474903 42.357910063876  
40.8970401536578 44.8997235283254 44.4688999098904 39.1553169409075

CRELD1 88.4385631861141 139.022985518859 133.259195601344  
74.9236800269025 139.758805241617 94.4618437533343 88.4385631861141  
97.9497090233081 76.3168793429802 146.737709403779 105.15507796881  
130.775349446374

CRELD2 641.462632112151 624.097858948785 713.243132093773  
663.904584382358 868.899376368472 469.553640187203 339.679549262298  
414.794323433931 597.191426276771 321.21879937379 487.64491967937  
323.002018912848

CREM 42.2455707947223 39.5050383901884 37.5597671487621 39.1706564265495  
41.5668884168669 39.6251842352088 42.1607322031054 42.0494116081998  
38.0213051227859 38.2069499294002 45.9104478407175 42.357910063876

CRH 51.8781065691038 878.863554510943 59.7483827511172 46.8954576545929  
5811.22276358172 977.776395810338 374.723141438448 3602.30252142918  
171.770578381558 62.1035858593388 56.4873776344986 46.7182294568603

CRHBP 41.9407041937973 43.683792219729 44.9758339877851 46.614092935749  
38.8834538955 56.1671440556142 45.4799270968969 43.3262148375525  
44.8997235283254 43.9783383422823 46.0513515682555 41.3948836161924

CRHR1 56.2508140932179 52.153603364404 53.2046867327331 46.7577982595088  
64.5531442955004 53.2046867327331 50.6774883370457 58.0892402609917  
59.0216019867146 56.1912096308988 55.8173045043348 56.2804354745795

CRHR2 33.3307770183871 35.4484652445078 37.4642807402741 34.3595588146954  
29.9775071862804 35.8227939208521 36.634024014558 37.4484310268909  
38.0213051227859 40.8049408996274 35.1470994647364 36.2582325396375

CRIM1 56.0477607422828 122.531570028682 96.4740168904128 52.3004056941891  
77.4769634299218 110.312681023811 97.4515987591398 62.1934012861178  
64.1267046511632 72.3297091475814 84.8084949516218 157.133627517432

CRIM2 47.8249696958403 39.9697332660833 43.7630587657205 43.074472921841  
40.7779767565889 41.8613406887824 39.5496902678788 44.797320243931  
39.6609238036815 40.2112371512838 43.7585538437696 32.3796054199032

CRIP1 814.991871217268 249.704644191338 289.17237603899 783.440408023061  
80.257554904218 908.328776521114 206.676666936979 953.143041145545  
139.04252811433 288.237195966495 261.6201598868 501.452602126588

CRIP2 1110.39060103557 588.736435715365 787.671342652389 277.548019244696  
153.920604317629 552.162906190653 474.155196153863 418.410951118141  
741.908952472992 432.001201940414 478.296779356592 349.90835241442

CRIP3 43.6706764143908 41.2598458726002 48.7039705048129 39.066284740632  
41.8806343997257 40.4359177791566 39.7576136507593 40.7311497914871  
40.2274522635576 45.5776159432079 43.5710871617107 41.1554481567603  
CRIPAK 96.4033477961156 172.39907939484 228.134171304754  
120.436827608155 102.085154509866 107.309776354951 105.382126899524  
90.1430468048409 96.1710806345503 127.937436596431 106.654782265295  
99.6243435693941  
CRIPT 179.994715581707 209.750053979826 273.981867154936 199.522267292552  
140.719373122712 175.876518898179 167.872060678879 307.329227013816  
166.097017297742 159.844078593375 167.920131968611 281.262083731954  
CRISP1 41.7397731376692 42.6939394537076 38.6727842796202  
41.3027031037343 38.4135023167287 42.7107928951766 38.7337086062875  
42.7431359850339 41.9635525160083 39.5637454855233 38.1835938174625  
42.1537476443423  
CRISP2 36.6480005877129 46.6996902348633 43.9450023643394  
44.1483976313959 42.3685136297603 44.3648993568405 52.2476631126873  
42.157627240486 42.6366765186182 44.0409178714232 44.3763859390287  
41.1554481567603  
CRISP3 36.9060997041453 41.2598458726002 41.437237454134  
38.8495095797881 40.9950639693255 36.6996187567892 38.7337086062875  
37.86982638952 42.9020321355927 40.4136535208406 46.824299585607  
39.5418280570561  
CRISPLD1 43.5710871617107 45.3756389170606 43.5420658412177  
46.0905079010237 43.0723817756832 45.1873487463472 44.7255207589606  
46.4672637826582 61.2510119532409 44.9673049606589 42.046575509735  
42.0709558258414  
CRISPLD2 813.242005949542 314.992390390165 162.151812425949  
586.281182112872 421.445268560815 1052.16097214718 196.200780398883  
758.462554576949 171.302214895226 641.837188326604 869.879392791086  
761.922486104216  
CRK 224.60637398191 245.769212889294 237.039707901886 211.451463038315  
286.11425202743 271.275703732022 226.090904721424 146.087016079575  
280.034472186873 158.590601962928 188.887559923238 219.918644151214  
CRKL 685.386956092142 588.972273484465 625.805967352327 577.993850127555  
768.888528247493 538.716947884528 612.014486689487 605.970682363975  
953.143041145545 893.185203928127 781.223434214089 801.351998609551  
CRKRS 79.0304119352941 201.486224052899 183.746651924774 454.293803256904  
102.085154509866 60.5803031036931 90.8691042645133 106.292775688671  
78.9521593412581 80.0651801266824 76.4389426517528 82.8275497073451  
CRLF1 44.7044140979108 51.119812302881 49.3780606970538 44.9370339275041  
59.1948983423381 57.0775902639215 46.3057385979341 43.7396619462033  
51.9545473262296 52.0999467564713 53.2083147523758 57.8111054584154  
CRLF2 41.5787026298957 40.1989248349075 42.7815195866158 42.0102671859606  
44.4088785101698 42.0574848021044 42.6786833450085 42.1812299265547  
41.9180247412837 38.745552403895 41.0441816173391 43.2312848495114  
CRLF3 93.8361140725228 129.414877519657 97.0155195562193 174.368595478868  
98.9657264176664 106.418690759491 134.19834305339 75.9659252679925  
98.0023132593711 61.5112659162073 85.33395043174 93.0714382925187  
CRLS1 380.098235864256 398.641868389511 359.83890067786 374.978401470437  
709.730555484551 469.78210773245 499.356036793973 263.706801812277  
396.93169345515 179.767874494671 275.928723831899 501.148339791372  
CRMP1 53.6741873729867 54.1443658899385 48.2415341573501 52.8041782638549  
48.0234896130991 47.428201097025 43.1563544904505 52.6529161327083  
45.0017158586743 45.8424887733913 45.4799270968969 44.2925355984056

|        |                  |                  |                  |                  |
|--------|------------------|------------------|------------------|------------------|
| CRNKL1 | 51.8781065691038 | 57.4054069675016 | 63.6334154351075 |                  |
|        | 60.1837189855762 | 87.6178717341967 | 69.5645254789371 | 57.7805922926828 |
|        | 53.838484549134  | 52.0583273941813 | 64.7269156363245 | 71.1607965028029 |
|        | 59.5080588072694 |                  |                  |                  |
| CRNN   | 51.1740855632044 | 56.1355483199198 | 51.3268475761593 | 71.7167037224069 |
|        | 58.6481644777552 | 41.9543948167375 | 45.3597029614942 | 127.596368103014 |
|        | 55.7522234735038 | 50.5252048155459 | 50.3221380889396 | 45.5800840647989 |
| CROCC  | 48.3814421939888 | 47.5647821785529 | 52.7005092555102 | 54.6089451252049 |
|        | 69.3468840908665 | 72.149478755262  | 56.4809146784765 | 66.5234828659154 |
|        | 57.7865070833351 | 66.4510869175159 | 78.7260936224802 | 60.1837189855762 |
| CROP   | 91.903810379105  | 115.441414762268 | 95.9485602132766 | 80.6317356144732 |
|        | 112.202543937743 | 85.7208881534518 | 89.2913927776683 | 111.910324041953 |
|        | 106.042585997437 | 133.314819245044 | 124.611407530723 | 123.841740274811 |
| CROT   | 89.1632548302738 | 239.023368693467 | 419.054753590648 | 64.6945454069792 |
|        | 105.825228126465 | 81.9983163893373 | 200.002687565519 | 201.427008153788 |
|        | 226.235985918654 | 504.281506941044 | 433.89783033465  | 457.202737754842 |
| CRP    | 40.3478825593224 | 43.683792219729  | 40.4070046183108 | 46.3203995372658 |
|        | 39.3667161654772 | 40.5281496800812 | 40.4359177791566 | 40.7311497914871 |
|        | 42.6366765186182 | 37.8217989841918 | 42.0750889188255 | 36.9976231206067 |
| CRSP2  | 48.2731865958235 | 46.5650556481721 | 49.4129140341868 | 46.3884811643547 |
|        | 46.2437291185739 | 51.2270031175419 | 50.7568454312473 | 47.5414586146928 |
|        | 51.6225091954608 | 49.7543329469677 | 49.2965344002582 | 56.5500409758451 |
| CRSP6  | 58.9201382292404 | 52.2501726671381 | 52.9111155236961 | 37.5382094267692 |
|        | 47.0954207417646 | 51.8103411703261 | 59.8273072817267 | 41.1575777497576 |
|        | 51.6731332961917 | 48.8623729374733 | 51.6414075056938 | 46.8129509799753 |
| CRSP9  | 82.8485522398913 | 57.8005007012205 | 75.0801071257739 | 66.130427690095  |
|        | 58.174555206394  | 73.4820932957859 | 47.9665737016961 | 63.9851732498913 |
|        | 67.1278109419819 | 65.0423160790157 | 65.6824363141962 | 73.7986685173579 |
| CRTAC1 | 44.436995101921  | 7127.13565491501 | 4128.92158369026 |                  |
|        | 167.16650846037  | 331.935072199058 | 175.550329937952 | 164.580141651883 |
|        | 62.5528124447176 | 203.373397813051 | 3114.05035137552 | 2892.02001412369 |
|        | 517.216393517181 |                  |                  |                  |
| CRTAM  | 38.7537364570873 | 37.5469247328848 | 44.1452943804044 | 42.0102671859606 |
|        | 50.7615314686244 | 39.9397419279057 | 38.8417151851134 | 34.8949555140527 |
|        | 37.8319142847141 | 37.4302011516587 | 38.5668610487033 | 41.2437378488025 |
| CRTAP  | 117.355761277966 | 121.696160351886 | 153.992331037033 | 129.352472514981 |
|        | 238.164418453962 | 458.47341225284  | 87.0685571351947 | 84.1922656126304 |
|        | 112.362505628749 | 123.817018264773 | 164.780216383719 | 181.705809767061 |
| CRTC1  | 67.4846787600629 | 60.8608693323868 | 83.4679576894911 | 51.5913529948887 |
|        | 79.6516904169771 | 67.8208976798364 | 60.9648845690177 | 72.9074911694002 |
|        | 66.3209349903185 | 72.2443746456494 | 85.5839487225537 | 52.7530873093837 |
| CRTC2  | 58.8224410806741 | 54.2924642952939 | 52.6275131390249 | 59.4674205670657 |
|        | 50.3713170502557 | 46.6872654833579 | 54.8074655158941 | 71.5062409407193 |
|        | 59.9108736364178 | 59.9354531144375 | 52.022479439889  | 64.531467526747  |
| CRX    | 40.4639532172338 | 43.1805016690297 | 43.6670755115848 | 50.2163892855092 |
|        | 39.6535880152834 | 40.8634043028528 | 49.2546642180676 | 38.4540849632254 |
|        | 41.3803269429468 | 35.6208308220005 | 41.9083581529276 | 46.3411353377615 |
| CRY1   | 125.713216265584 | 94.1050519074545 | 73.0686482917042 | 109.144663527001 |
|        | 89.1012752492647 | 105.414552529943 | 71.599955759893  | 101.681822254799 |
|        | 117.565415291934 | 54.0917531668054 | 75.1562329744435 | 137.302487233881 |
| CRY2   | 66.0303950772736 | 66.1288889125299 | 75.7464604972652 | 63.1604223919703 |
|        | 53.4109882045447 | 128.776189744323 | 50.0088611244948 | 91.5258329186709 |
|        | 68.3157692917711 | 165.42634596698  | 171.176393131741 | 116.17375251898  |

CRYAA 42.3433931248155 43.7644428186265 41.1367478979484 39.9697332660833  
40.8873907150245 39.3841861812262 41.1507980856436 44.8997235283254  
38.9834959368496 39.5637454855233 41.9908237694988 37.4554876386402  
CRYAB 155.270252661048 91.1741538903522 86.2895084312264 152.679927202674  
100.90948905426 1656.16581692717 51.9421032049606 109.481322353402  
48.0163377492228 623.574706535278 1337.53997230271 1611.35913846618  
CRYBA1 46.5549623118323 33.4967065724734 48.6037684272115  
39.7411455670172 41.3755760434934 41.159706131351 32.4466419672036  
34.3865306339645 42.992884918158 42.9866214102525 38.2795150354677  
39.3575468494941  
CRYBA2 44.5282181324797 45.1694246393676 44.014441886238  
41.1507980856436 43.1847628331565 42.6575535390785 41.1886975241176  
48.9826868640753 42.6366765186182 44.2580151149956 41.8168470823451  
39.5418280570561  
CRYBA4 39.3709357615493 38.0226905622357 36.5474283500601  
42.4580504587581 38.4540849632254 38.9378717994178 40.4359177791566  
40.5158867964016 37.2810767789306 40.3235655331796 43.9450023643394  
39.5418280570561  
CRYBB1 45.1912496459517 40.8880530359822 40.7620472083159  
41.5464765641928 38.8456942580061 49.2050538150106 37.1643693306382  
40.1474543172332 39.1790517315259 38.6454098044474 40.6373400186325  
38.6454098044474  
CRYBB2 84.0388582916959 68.3372228877569 51.3268475761593  
53.8086134112366 58.2780916793348 55.6242009731278 93.5928272702304  
158.081235081686 77.9028721785469 62.5036823572932 57.8111054584154  
59.4465684293847  
CRYBB3 39.3709357615493 39.3999056968598 40.4070046183108  
39.066284740632 40.8873907150245 35.2067831864574 37.4772922422734  
39.1652965788406 42.357910063876 42.6793753550854 37.6484782516569  
36.449101775775  
CRYBG3 44.5282181324797 46.1569135229922 42.9104454767916  
42.8235313007746 35.1411239266238 47.57333603903505 38.4005795891396  
37.6557714476853 38.7298222155532 35.0668743708816 38.956280281655  
40.6614700944853  
CRYGA 44.0328992213727 48.1627097465883 49.9256753636167 43.9282059368202  
43.6587492470348 44.6524308640784 47.8947595316832 50.9933795450314  
44.4395580493118 39.2623423164488 50.3221380889396 41.4508241771315  
CRYGB 39.266565827316 38.4330755397458 38.4043916290561 38.8495095797881  
41.9842695818285 38.1169703906207 39.4600924554505 38.3684202018524  
39.3750969348308 30.8150126829901 41.6336636285875 37.8490162439785  
CRYGC 40.3478825593224 41.159706131351 39.8299340037009 47.8164193292842  
38.1644569189523 42.357910063876 40.5585676679482 41.2551966132486  
41.5635499110307 40.4136535208406 42.5426057453993 44.6484005362281  
CRYGD 38.304249186058 37.2810767789306 40.5734458834617 37.29566077996  
40.0599807618105 40.9506062495231 46.5650556481721 42.157627240486  
38.2215591930186 46.1390887492649 41.9083581529276 40.4639532172338  
CRYGN 42.6036491382658 36.6002100641539 38.1421709520616 46.3203995372658  
30.7606118575469 39.7394181011603 36.08956004634 38.079222289614  
42.8036731479932 40.7063426028871 36.8282383070068 34.4570158133896  
CRYGS 70.083473392272 74.621822948059 78.9701459806641 74.2429851177794  
61.8471691369569 57.8005007012205 47.2927436772465 54.5125550937898  
56.0496524902806 78.59966540743 66.274247400793 66.9239565096247

|        |                  |                  |                  |                  |
|--------|------------------|------------------|------------------|------------------|
| CRYL1  | 93.8361140725228 | 82.7351935657355 | 98.4930941487534 | 98.2447263268855 |
|        | 67.7155610106537 | 153.515845356859 | 83.2162112994735 | 113.528908699366 |
|        | 77.2413564369342 | 113.169111095305 | 105.953705702398 | 134.633769604568 |
| CRYM   | 45.4321966598751 | 39.1982470626863 | 38.5470982022687 | 40.8681871019812 |
|        | 41.1868052124344 | 54.2924642952939 | 40.3850714987723 | 55.6351010690528 |
|        | 40.5465626311506 | 47.611018474151  | 47.2134341420411 | 43.2115532536912 |
| CRYZ   | 221.195872577098 | 594.184150517102 | 225.559405596065 | 109.726577835621 |
|        | 107.646103699516 | 313.233036704221 | 364.795587956819 | 228.185436206823 |
|        | 97.4062608315831 | 656.355333007615 | 461.83420090894  | 632.577797921655 |
| CRYZL1 | 111.6348079332   | 143.068901273486 | 183.311305255895 |                  |
|        | 93.4180535865914 | 129.754481922118 | 176.064476306748 | 115.861269747317 |
|        | 123.908152883436 | 104.986694941968 | 194.207518642389 | 172.221482103025 |
|        | 196.561401686392 |                  |                  |                  |
| CS     | 378.358853591082 | 432.355300448283 | 433.637087338002 | 340.370474635434 |
|        | 442.080188140864 | 325.563540852801 | 542.069156178791 | 515.409979010663 |
|        | 410.808988840343 | 375.095491465679 | 319.722393409101 | 383.779263351825 |
| CSAD   | 88.3335649692467 | 113.624887028422 | 147.043419185015 | 72.4834467838798 |
|        | 88.3954618645976 | 73.8105012820769 | 69.1414574152997 | 243.549194928524 |
|        | 98.0023132593711 | 92.9043863423147 | 101.954354107731 | 120.221914344372 |
| CSAG1  | 40.9558083259517 | 42.2900457798748 | 40.0557788909923 | 40.5484717678957 |
|        | 46.4732328055735 | 38.7578265341627 | 37.2892641289258 | 41.9820792173615 |
|        | 150.636903991608 | 39.3698811593364 | 42.911855821602  | 40.716553247236  |
| CSAG2  | 36.4564050256915 | 41.6466169548846 | 33.553634633839  | 36.4564050256915 |
|        | 35.0181575202066 | 35.314469458379  | 38.8417151851134 | 39.5466975353131 |
|        | 46.1101825640108 | 39.6719190054379 | 34.8383995317036 | 38.3291713594599 |
| CSAG3A | 46.1673159982664 | 45.4143854024453 | 44.696023817801  |                  |
|        | 40.7481155008596 | 44.2607789091176 | 44.6524308640784 | 43.3262148375525 |
|        | 41.9820792173615 | 112.202543937743 | 43.781101409552  | 48.2050207071554 |
|        | 39.3789825717286 |                  |                  |                  |
| CSAG3B | 38.5372368196365 | 40.4882741869718 | 42.2577689927563 |                  |
|        | 41.6186264038868 | 39.1177164316495 | 40.650742261428  | 43.5627649099623 |
|        | 43.0944129868777 | 141.784776736918 | 42.7211272990786 | 42.2618615571566 |
|        | 43.4390398501329 |                  |                  |                  |
| CSDA   | 1213.3477481374  | 2077.74475301595 | 2337.7738990994  | 1320.7894611262  |
|        | 1526.94101719128 | 2513.15722262176 | 1526.94101719128 | 946.081492716653 |
|        | 1848.50311456636 | 1545.76489731307 | 1835.21901524331 | 2689.80835574654 |
| CSDC2  | 64.9367707455078 | 39.8695929627783 | 42.5406888281114 | 43.074472921841  |
|        | 44.7829632472754 | 92.8131698915896 | 49.3854238365325 | 48.0582855095143 |
|        | 43.5669306063196 | 77.4046818339539 | 91.8414653633828 | 69.51607174053   |
| CSDE1  | 60.9009676344258 | 59.2251746728404 | 66.8288956287896 | 63.8694991450134 |
|        | 66.7426485694967 | 96.3976093220249 | 66.1940959364976 | 59.5830868881343 |
|        | 62.6885730386156 | 76.9603875266956 | 78.5325880060762 | 79.2989156727401 |
| CSE1L  | 358.779372054826 | 361.023743912857 | 409.899024157206 | 242.080992016235 |
|        | 503.661461720233 | 344.133384411423 | 589.395944599882 | 559.9670724278   |
|        | 540.304257899761 | 329.282615395786 | 277.796753761378 | 447.248719481853 |
| CSF1   | 42.4607795638552 | 38.8561375693335 | 40.0998167098057 | 55.6481366056639 |
|        | 44.931941140132  | 50.5761139779524 | 43.3889851892323 | 41.6972107715212 |
|        | 42.0621425894624 | 41.0529409675663 | 45.6895223823001 | 44.0451487108213 |
| CSF1R  | 431.727858902449 | 431.018580441405 | 533.820505121067 | 1377.24483375075 |
|        | 265.860397918913 | 1086.12171444149 | 229.428422408702 | 289.17237603899  |
|        | 83.4465817617201 | 383.966991071954 | 227.243009473121 | 185.312851727212 |
| CSF2   | 43.9309845324767 | 40.6380495994768 | 44.3344900481112 | 61.0845101400379 |
|        | 35.5220586859301 | 43.0860383229288 | 46.0228732507872 | 54.5125550937898 |
|        | 40.7847110517594 | 37.0320432433314 | 37.1059647239814 | 37.8490162439785 |

CSF2RA 481.905052451245 232.740032714891 259.220844287491  
731.071171171638 184.377148097206 163.946447772618 331.173265739654  
719.815240381415 174.263925108623 443.269396125834 441.5479786095  
359.628703006773  
CSF2RB 37.0320432433314 41.159706131351 41.528370959196  
135.138667957956 45.8051846088552 44.5544727111028 47.1345949868029  
43.2551508830106 35.1155486926999 39.5637454855233 39.153226699662  
39.1553169409075  
CSF3 39.1919930809584 38.0226905622357 40.641503836284 44.265834798964  
39.2036764702265 62.9126261960734 39.4859911554583 42.4864576619427  
38.7537364570873 39.3698811593364 36.0013326338316 36.9976231206067  
CSF3R 67.1387898740161 84.3995736970187 106.537423775385 1676.22158135012  
99.2341244350412 145.865118592916 283.88971280023 62.105802634526  
47.1098984140276 54.691568065544 50.7903824729818 55.916393897815  
CSGALNACT1 55.8218917166321 49.2050538150106 47.0055981216687  
47.0874209746031 43.004943518025 61.6219790276408 35.2163900400329  
38.4540849632254 37.1820543575123 65.3377940117969 77.4625808567081  
53.5643281930979  
CSGALNACT2 37.6397652536077 38.9338521051669 37.4642807402741  
39.066284740632 37.2567512265363 51.294537308199 35.9894133432376  
40.7311497914871 34.4716904283753 38.957687788868 36.9060997041453  
40.0557788909923  
CSGLCA-T 99.6265783263109 103.883220270094 158.321459945365  
150.336199715245 105.317399386109 73.688423848106 81.7434024567356  
80.9092480872499 100.874437079608 84.5055910320032 86.6798536307388  
87.5074297754031  
CSH1 39.3303857231606 43.4653857912983 42.7815195866158 41.1886975241176  
38.9863369890964 41.554942319225 42.629412460409 38.6454098044474  
40.0952076421149 40.650742261428 39.4736654224088 40.3691324547049  
CSH2 38.7537364570873 43.3972849968032 50.5089777244781 40.646702696033  
38.6454098044474 40.8091178323174 39.1539892144371 41.2098211956301  
39.4762546236449 43.401782064778 40.4094901248527 39.5792604499113  
CSHL1 44.3754281580557 44.6918600441328 44.9107703930879 41.7614975630362  
46.4343327861696 43.4215162178364 44.0256815382334 43.8783254873901  
41.7117861328546 44.3648993568405 44.6286581923295 41.4061152929154  
CSK 733.358170858378 792.880882528835 343.304521604977 667.710357746751  
964.268294825556 289.213144287085 1247.50618540769 673.522667186915  
764.571579067138 458.47341225284 388.132295362791 306.294404016622  
CSMD1 40.9157352260901 41.6466169548846 43.9450023643394 43.9282059368202  
38.7864161493321 40.1428591998404 36.4564050256915 41.8767957887205  
36.4476883897928 42.233842834629 42.0750889188255 36.064718696392  
CSMD2 48.8941062980393 39.0102066700839 36.2683886571585 40.7481155008596  
44.5668141895992 46.8954576545929 32.4466419672036 37.86982638952  
37.8319142847141 40.5090849993014 38.6662194645633 31.9386613757097  
CSMD3 36.3649677956953 40.591923288644 39.3344387353654 39.0031581123233  
40.8351751854504 42.5089442785482 40.2649309204478 37.1317006162938  
39.853866204927 36.9795961564828 41.4918397757335 36.7172300749476  
CSN1S1 43.0462952354436 42.0709558258414 38.6414316877471  
38.2599935139101 37.4470183315826 40.1930209223556 43.8835874380262  
40.6723334103791 36.8127605061228 37.3687900733549 38.745552403895  
38.9834959368496  
CSN1S2A 43.2724556187214 45.4882438975269 45.3974838013476  
47.481302504066 44.4489662507893 42.8598805316863 43.3262148375525

38.8495095797881 42.6366765186182 44.7958122466628 46.0095710163378  
40.7704587752083  
CSNK2 35.1307934330047 41.8848959280916 45.3974838013476 34.9221408381038  
35.3327761997046 39.8455060654531 44.2166118829877 33.9687743313429  
45.0017158586743 39.7835513496873 42.911855821602 38.6454098044474  
CSNK3 36.2496364442264 42.3550738181144 41.6079958749402 45.5869891570251  
40.5710637884029 41.3553369544097 41.3594868055879 41.5464765641928  
49.1940901905636 38.3092241935352 39.5399188536544 37.4554876386402  
CSNK1A1 85.9555871743678 110.431464700539 128.635811501506  
108.589036223189 99.3142021810133 118.341308125578 76.5505585423421  
82.7269382676336 116.007007037602 73.4019696977096 78.2839612497413  
118.899737794318  
CSNK1A1L 39.1590964332473 41.6466169548846 42.5890635915791  
40.646702696033 43.3896803974186 41.3553369544097 42.4939802311136  
43.2890595186135 42.6762317063737 38.957687788868 44.7752571196612  
42.7782216342806  
CSNK1D 248.599530435666 348.964065997095 353.751797948675  
440.421077161585 329.282615395786 191.141778714144 368.793978305607  
325.172633427119 366.326747630465 202.795613942391 194.207518642389  
176.839214683647  
CSNK1E 323.957165066178 325.275883498219 207.741669973713  
184.087380444203 312.40869171788 284.437758089699 608.886783362316  
446.902178094675 257.325282051981 437.84407370064 368.318359434313  
341.397811775105  
CSNK1G1 69.0975200641705 59.0216019867146 50.3334140358007  
68.1040271620925 66.6118713143653 56.432280646473 63.4685821260797  
77.441946514938 65.8926843080114 76.5699943825825 64.3824529624475  
79.3315961732103  
CSNK1G2 284.013140015092 370.150839052727 370.240482282297  
210.958578914607 394.255628555051 200.019523376661 292.86576686019  
288.190015621249 317.483708873867 193.364522980854 286.996922972683  
222.696947669812  
CSNK1G3 65.9900865113645 69.4820178305563 83.2737524877952  
69.9101676350298 82.97559574338 79.5270065657539 70.2288685232877  
65.9143782252686 88.9641595603127 64.1675023456571 70.5704019848974  
89.8808683919332  
CSNK2A1 102.380096190518 113.051477801522 98.0023132593711  
70.5992463788381 161.008205823493 83.4033736999037 144.976378707447  
75.9136854087044 96.5175130622216 68.8167148906225 76.7806009547111  
95.5724734464786  
CSNK2A1P 85.7983996395757 107.70358681113 102.00080367858  
88.3459116251233 127.701556328274 82.8652108020571 118.816772641597  
94.339011229577 82.4975645442705 72.834275688835 71.0369238830779  
73.0464199386528  
CSNK2A2 285.626835802986 303.670126704469 371.042302128933  
218.917221711155 187.430528830941 377.409970666607 314.533750876361  
182.685579297058 377.847116683974 423.608694638779 347.750020791938  
357.800871454252  
CSNK2B 1423.29307392266 802.650020720921 968.405745860353  
869.879392791086 968.405745860353 794.806085783439 1017.1803754111  
602.047768767953 929.862002014478 950.740991182127 758.462554576949  
596.84269596976



CSPG4 56.6951078698291 53.812632592983 74.0913177754682 51.223859150798  
66.7426485694967 112.23915619297 34.1889222434768 47.4740726032707  
43.9450023643394 104.288073521816 96.8490167966217 80.1461294346211  
CSPG4LYP1 36.8072833828297 38.8336427948187 42.157627240486  
44.4367387274922 42.9090346219023 42.357910063876 45.223075311113  
37.86982638952 39.7537274655115 34.6720534245631 37.4642807402741  
36.064718696392  
CSPG4LYP2 40.3478825593224 34.8137085420423 39.6451483836089  
37.7469621225553 36.3390947880186 38.2293008890613 40.9157352260901  
37.2237132058632 40.5912213523345 47.0055981216687 44.7926323492519  
39.9519547348106  
CSPG5 40.3478825593224 44.3529919625344 35.6139301508335 44.6905691366696  
44.7829632472754 37.2686490268265 42.1607322031054 41.2551966132486  
40.0403898620771 39.6719190054379 37.0180934800573 38.745552403895  
CSPP1 96.8783070574131 92.9453353261232 80.5537984388921 74.1068645821427  
110.869341159607 78.0013795192762 77.9028721785469 60.0835531094681  
90.1032802171477 78.4289643729837 75.5799609581534 88.8330881965986  
CSRP1 1080.43016747082 671.959673037066 675.079525434102 603.224267841548  
382.744696166534 7323.77427153966 387.867128019374 842.3367709562  
560.954913956997 5776.17749026501 5895.03230740197 4665.45637589484  
CSRP2 87.6178717341967 142.863673914134 68.3234331335073 83.4756142147167  
67.7155610106537 197.421622315466 140.264270771578 70.2541961995753  
211.829374574045 73.2445837559745 69.7215372275927 134.239606718101  
CSRP2BP 61.141483572676 74.0995052892511 77.2979451706651  
68.534940191185 110.973625869849 87.8081021392626 110.909109947659  
73.2870828361337 73.6512983066046 76.2533853403813 87.9871827215149  
80.0042268333735  
CSRP3 37.1485601150873 38.8336427948187 43.6670755115848 35.314469458379  
38.0598374201407 37.7000400506818 39.1539892144371 38.3684202018524  
36.197424053556 34.4875013487777 41.3553369544097 35.7451401627836  
CST1 41.2424637338424 139.022985518859 147.858425171297 43.5627649099623  
44.5668141895992 37.4782441311626 64.5722284870633 207.215265436327  
58.6431245059655 169.838827072973 47.4630625313159 454.551748488397  
CST11 41.678190413467 36.0366673493555 39.8656165405284 37.4642807402741  
36.8059561571675 36.4434672195785 38.1169703906207 35.2184611663232  
37.9837233601316 39.2623423164488 36.5359455830388 41.4508241771315  
CST2 35.5179217192467 38.3322849790657 33.4240466670776 37.7469621225553  
29.4322896559759 36.1190722948669 33.4316681623175 33.0038344711883  
36.6312676076142 35.195364621675 35.860430241131 32.3796054199032  
CST3 2435.70120719503 6938.87250165681 6819.74871209328 4632.08655821299  
5601.18872540083 9181.13240708506 3021.24285327836 2678.43227619157  
5112.4354472796 4503.77675488367 5218.25814076207 4986.44888767011  
CST4 34.8099089553046 44.0409178714232 36.8730514568925 44.6131679221578  
41.467005949568 43.4681646416585 39.6123051184545 37.3875631460917  
42.992884918158 40.3458948319669 40.1742127891824 39.6833800000587  
CST5 35.2267149016596 36.9994058279362 36.8730514568925 43.074472921841  
39.2608760193011 39.3841861812262 42.7431359850339 38.5457716679071  
40.3316153483289 44.0409178714232 39.8184668132023 39.3575468494941  
CST6 80.8943070653517 81.0766789453664 78.8968326770219 88.4439480366515  
67.1702819938085 43.6960408897486 73.3042538589134 91.6253858792439  
63.7665341104267 42.5300425828351 51.4941811056642 38.6060558847357  
CST7 70.083473392272 83.014860007187 72.2016884438365 334.527003257901  
58.9875400392427 73.0247140074919 118.483499958227 71.0593419018503  
47.5564423692142 64.1097859982912 60.3431719501866 56.1136936405786

CST8 43.6706764143908 41.6466169548846 38.6727842796202 47.481302504066  
36.5393857306744 38.2293008890613 41.0381860307445 39.0620487644635  
40.0403898620771 41.9666541498638 44.0409178714232 38.8495095797881  
CST9 48.6621527194963 55.2893984191264 49.3000844711116 52.3004056941891  
70.5676924620725 53.1052228246467 68.1125016199524 59.9968592852122  
62.9922928277769 59.8130420783374 55.4694986901287 52.1918130336397  
CST9L 38.957687788868 39.1982470626863 31.9895827886879 38.5252456306656  
31.8228237796461 40.244271403831 37.4772922422734 39.853866204927  
44.7058233759912 45.0155543555707 37.5583886316038 38.2350720635382  
CSTA 38.5648843914189 71.3527183280827 47.0055981216687 73.3725472767369  
58.5450868286167 44.9896851005259 35.9058393060637 45.642304356051  
61.3733228199803 44.8997235283254 48.6184776976167 55.4635297192076  
CSTB 2196.59044510709 4858.39551231606 8050.256095383 4569.48246031279  
5354.58328030315 2621.65272077828 6483.09366281532 2091.0611913538  
9852.7965902602 1588.70376317303 2712.36664370642 3520.7579823657  
CSTF1 40.0079769153431 41.1090481599939 45.3675390992851 41.6045220683604  
43.990679726464 42.6575535390785 43.4885245598939 39.4270866851816  
37.9837233601316 41.1222709786153 41.8168470823451 42.828737648529  
CSTF2 188.61489831342 213.028412890553 160.733526836282 137.955007835039  
165.613176704286 113.716666562787 365.792144095604 353.598144765197  
232.402174615698 163.048439401341 142.945182805248 151.111664091983  
CSTF2T 62.1448806673973 68.921126710047 55.6865353018811  
56.9299697426319 60.6400800519777 73.3506594385504 46.7100796279384  
47.3791873993182 72.1591028956359 68.534940191185 58.7389869173495  
74.4365426051588  
CSTF3 119.434418653131 180.562005428669 222.66558323175 110.785049776763  
252.280105035425 116.817127851913 174.275409358652 236.759651096748  
188.513581321162 194.827750623463 153.940127525369 153.626578526803  
CSTL1 44.8914371498528 36.6968906669565 40.931294690669 38.9534635879195  
42.4864576619427 39.9397419279057 42.629412460409 48.4670130605028  
44.8003345643334 38.8507804383261 44.4688999098904 38.0452862258803  
CT45-1 39.0620487644635 39.3681232503406 42.8768096578102  
38.745552403895 40.3124262005404 38.3956445058349 39.4069390012996  
37.1317006162938 40.2752425854368 37.5672792721124 40.4504608195666  
35.903067617318  
CT45-2 42.7150227340364 40.3384318592985 43.8495248991589  
37.5382094267692 45.6895223823001 40.5281496800812 37.0564573649223  
38.5457716679071 42.1594905198929 46.1390887492649 35.860430241131  
41.2437378488025  
CT45-4 44.3819828231602 42.8142224866049 38.3626655809423  
56.6458456890715 38.4540849632254 41.2040352443154 41.7656868106485  
43.3729486804084 70.9462008788871 39.9576138799997 37.8766103688718  
38.6454098044474  
CT45-5 41.0608773166058 38.380619572367 41.0705134231814  
38.7035509484261 38.1096479110295 42.0082685530808 42.2577689927563  
40.4359177791566 52.2631308081333 39.7835513496873 39.9899430628542  
38.1421709520616  
CT45-6 39.8662795144616 41.6466169548846 40.0998167098057  
46.0228732507872 50.6470461863549 41.554942319225 44.6032218589199  
38.745552403895 39.7537274655115 42.0621425894624 38.1835938174625  
42.357910063876  
CT47.1 40.4179476219497 41.2598458726002 43.6670755115848  
42.1273928203021 42.3536549114165 42.8598805316863 40.2601451506332

42.0494116081998 43.5669306063196 44.0719548209593 43.8002456102021  
43.0322714179517  
CT47.6 44.5282181324797 45.620219291723 47.4740726032707  
41.0726336841311 43.1847628331565 43.7630587657205 47.0874209746031  
38.8495095797881 39.3506426665347 43.3465699185405 39.8577530602176  
43.0930293831497  
CT47.7 41.0608773166058 43.9421822132391 43.0016969050339  
39.0156305603334 45.0693869004277 42.5660695551615 43.0930293831497  
43.1931731665131 42.2248608921879 46.441301934328 40.2317542073211  
39.7411455670172  
CTAG1A 39.3275194442012 38.7344853699576 40.3452320167286  
38.8025302527057 38.2496050953547 38.7340969861754 41.1507980856436  
39.8812234363661 129.101365145456 40.5544182411001 36.5584787902344  
37.8490162439785  
CTAG1B 38.7229679986571 39.3667161654772 40.4070046183108  
40.5484717678957 40.0145811166794 37.9003288112261 40.3302268293707  
40.8833572570383 44.0519245668737 41.7405682794166 42.7275315121163  
39.3575468494941  
CTAG2 41.483412492426 40.3384318592985 41.1742244762318 38.9534635879195  
39.5595233162192 36.8527889114786 43.3832826368789 38.7864161493321  
41.134180463103 41.4397539024976 40.9583127801887 40.6614700944853  
CTAGE1 40.0557788909923 38.8336427948187 40.6312687664188  
35.5395819665562 39.859345745831 42.4155142987678 38.977631784251  
36.4931866273171 38.5252456306656 40.1179210534118 38.1835938174625  
38.1421709520616  
CTAGE5 42.8638014565441 45.3022591001932 43.3465699185405  
46.1074305700679 42.0472847316468 42.6211340086915 42.5660695551615  
41.4061152929154 44.5678064264717 45.3954000575181 44.4414964828926  
46.0106098064475  
CTAGE6 57.6913861717513 54.9144272974449 54.7350451926204  
49.085741080241 47.6884372645373 43.0860383229288 49.6011834770324  
45.4882438975269 61.6255834422379 59.9876575158981 60.2867996701867  
60.9446532180211  
CTBP1 143.536318305185 245.060552951511 188.789206373516 183.469819903584  
197.598956071422 207.380865650247 218.510816443243 114.623641209561  
249.101015988111 172.221482103025 192.922622120507 167.430013807712  
CTBP2 41.8409927585705 45.8284004440739 51.267956161763 46.0905079010237  
46.2478069975709 51.6558970571712 53.6294062560285 41.4061152929154  
47.6582396278888 44.5303781239209 45.9104478407175 51.1897992768608  
CTBS 100.489477730896 107.034189847828 121.650910373947 193.703214707909  
70.2565873027242 87.4239220649478 81.1284422173774 75.0377156190383  
59.1514832343922 62.9205616877344 70.0965466297064 100.289042948128  
CTCF 205.24499293304 216.976116788572 246.09270373893 191.771063132796  
187.002948435359 222.773939093637 251.65044168003 182.52420078643  
251.374750265492 137.658868649032 195.740109330843 184.105396912056  
CTCFL 43.4626049853157 42.0709558258414 41.785676764591 42.5664883002833  
43.9450023643394 38.3418933808844 39.6535880152834 40.3357777530419  
37.0126425326534 39.9948390976317 34.6366195121669 42.6758568421347  
CTDP1 52.7817052791259 63.6287257620165 58.0218262176065 66.7750249658122  
46.8022627504268 46.7293238583888 55.117521379579 53.4768201292155  
78.1448136847078 68.0556717366572 65.7924490713262 53.9918882088235  
CTDSP1 158.769954040462 181.2179249806 253.764071470001  
170.128899555014 140.719373122712 183.165559564289 123.336184278054

111.501058276821 245.630020408551 230.879083362388 176.138603484209  
145.72829095462  
CTDSP2 544.355979695242 535.313561995599 450.759762047652  
450.139987981805 423.608694638779 728.023307553872 312.015358620043  
395.298033031033 503.529187388654 568.905368101326 489.983164420779  
532.581631305218  
CTDSPL 180.679129876248 285.826380698286 416.323909993454  
109.503117647487 689.228901128857 539.188951045594 402.886581458688  
168.883366756191 415.759723627205 709.284769121309 493.705301673753  
404.674869177442  
CTDSPL2 67.9531693869426 63.2475738480323 54.0170817319522  
65.524821699432 71.5345397102823 74.6375749739389 74.621822948059  
71.4473248804357 86.9274372004388 52.2832912331043 63.9915902128079  
68.5174271063894  
CTF1 60.1705241170421 58.6249721386149 66.0411740221276 44.9370339275041  
70.9638091288679 62.2818512646893 60.3928833351886 45.7476095696859  
57.9713749600418 92.9894133685392 70.0965466297064 66.0786923699684  
CTF8 43.9577120438279 46.8059596594267 47.4740726032707 43.3744503319109  
48.2081129576405 42.157627240486 44.4074592653814 41.496883371243  
48.1174861108648 42.6211340086915 45.4953384153622 43.5367669381526  
CTGF 2663.19221471348 1313.92053019421 1135.43644148537 1387.28483887704  
782.639346040155 1842.15643221012 87.0685571351947 1084.23003918768  
138.50445813694 408.353336724969 1712.55038816005 1738.00955642263  
CTGLF1 56.921728372453 53.9275079525238 70.18107651423  
54.2886483704949 50.3713170502557 57.1752846228778 50.8388984085636  
53.4109882045447 52.7512110769042 52.5522545249206 56.7765567227989  
53.2046867327331  
CTGLF3 509.879213331349 561.855286945959 1019.67015337432  
355.568857981155 449.427251674566 316.419421649196 368.660803187338  
363.269936098507 455.444228161475 670.271164195182 775.515071756239  
566.548446430954  
CTH 61.9944005465335 42.9358255168086 40.0998167098057 47.8931773060789  
47.3172462673426 43.3356152004262 49.9162522057712 45.5051950394186  
41.1262212547458 43.0156099182214 45.9504618460054 44.5432192783161  
CTHRC1 1664.00821059181 173.328468320432 105.204861495017  
498.284928805673 243.952697457779 260.426488908824 67.9599395822006  
146.355277438643 59.0563795877672 130.313381811168 78.0909302258507  
79.8331445290301  
CTLA4 44.9896851005259 63.1780854659428 53.2874286456249 91.2715671868725  
38.307092962865 43.5474493120701 50.7487159427973 47.2340913300786  
42.1594905198929 40.769767732912 39.3895791800635 45.0583552831013  
CTNNA1 1405.20888023653 1279.90288378214 1413.36279821142  
789.511653564341 823.933615182634 1211.8832855325 1147.19483787501  
969.805093523651 1679.12630849964 1084.23003918768 1135.43644148537  
1448.17151189672  
CTNNA2 40.5654775358427 40.4359177791566 42.7303139017786  
42.1273928203021 40.8873907150245 44.2607789091176 46.5650556481721  
46.1673159982664 35.860430241131 41.2276963324981 44.7926323492519  
39.1553169409075  
CTNNA3 40.5654775358427 38.4330755397458 41.785676764591  
39.5637454855233 39.7162631015511 44.3194383179647 39.6158343667921  
36.9355798143571 39.4433784795209 39.9948390976317 41.3553369544097  
39.5418280570561

CTNNAL1 85.1950626054282 101.020328028769 63.955655956484  
92.3405202477427 89.847560289665 223.501516374076 142.846665249354  
91.8207081349104 87.4335749014848 92.6169846049935 88.1614325571117  
144.300051706447

CTNNB1 67.0384187945533 79.7882961549974 96.1596075221747  
69.1126897800223 89.3680268066234 93.5045354990096 60.7397678774507  
77.8039806950172 60.9801094225351 52.4752641497096 64.9559356780521  
92.5391033814713

CTNNBIP1 95.8734933265537 73.2842501003097 79.3066495980045  
62.1776700757427 83.8679756709676 66.8632294055679 92.0880591999243  
71.6202385170491 97.5962784863854 84.8276953169119 72.0073363366137  
76.3824005526731

CTNNBL1 243.489225650886 171.205726660714 189.984886903595  
250.65667565007 151.848243044839 299.524171071613 258.726193861248  
194.862177434028 247.547769833089 132.604567913122 188.582370265555  
162.23769718358

CTNND1 47.5647821785529 47.6229101519945 52.6782411631338  
44.3590588464211 48.3195541395349 40.1880266484871 50.0954869074666  
68.4229528414965 48.1489308918472 58.4262160879174 59.2455550633943  
54.3587260982091

CTNND2 39.266565827316 39.1982470626863 37.0642268327439  
38.4208429103799 39.859345745831 39.9397419279057 34.6720534245631  
40.931294690669 42.7150227340364 37.5343260962758 37.9946685306274  
38.8495095797881

CTNS 58.3702889417801 67.4280399954084 74.0913177754682 105.997702773537  
62.0925921750472 56.393737074538 63.2726414544553 51.9447450229707  
54.2089559589959 66.7585874672879 64.4953675557046 55.8775622338124

CTPS 271.138311888031 186.600931545083 126.578693258328 102.971363152434  
323.705254926762 293.755623192857 318.069132873489 295.917955889194  
226.580055691897 136.859309317164 134.697808298417 162.540906501584

CTPS2 125.835967514239 136.883475451494 113.388372364837 69.4281256780421  
108.868692628326 117.598001907902 194.225364352044 107.818253499703  
122.170704886985 155.332764598031 139.731620245421 135.19133529995

CTR9 60.1705241170421 68.307513091369 65.8455652907556 60.8581462216607  
55.2214187655851 68.2614370871382 62.2818512646893 48.7814131120945  
71.1441318672051 58.037539503209 62.0789181257889 59.987045425047

CTRB1 38.0089018744739 37.5469247328848 39.9101908547397 33.0463640202858  
35.0181575202066 35.8227939208521 36.08956004634 33.6816578730693  
38.2215591930186 39.3698811593364 36.5359455830388 43.5738557773903

CTRB2 44.6231541342 36.5219488315447 35.9305494063137 43.1847628331565  
42.3536549114165 43.3785777889265 42.1157692936428 36.6452480995946  
44.4395580493118 39.0266821712099 44.7926323492519 45.223075311113

CTRC 71.3900857589616 59.9682734755814 63.3544794716167 65.524821699432  
70.18594926052 61.9432904657734 71.3527183280827 99.5192591352063  
60.8635925649592 46.8954576545929 58.2315917325629 51.2318935933116

CTRL 46.5549623118323 59.6359245937831 50.9933795450314 57.0629653735694  
41.7929491793697 39.132725377815 64.7023558190673 55.5578334877425  
50.3245489035833 45.4614234442527 51.4413099192899 51.9447450229707

CTSA 513.891389190131 337.013669560645 426.276230164353 997.492549573274  
282.764445883135 280.526935074437 301.139592414061 357.44124276077  
328.46798329618 293.410413883219 239.96421556928 210.958578914607

CTSB 2978.46032143413 721.266942608349 900.517711546397 3761.48462220262  
522.377154567257 1059.63540694644 1107.96086673001 1394.28860933629  
349.480794966845 1673.60994518271 1580.58484708669 1305.35453202355

|           |                  |                  |                  |                  |
|-----------|------------------|------------------|------------------|------------------|
| CTSC      | 262.534449975056 | 250.308866488702 | 256.843419520398 | 641.837188326604 |
|           | 437.84407370064  | 222.202580186782 | 177.425508756002 | 170.223657280542 |
|           | 266.323732730581 | 78.8968326770219 | 68.2585858486846 | 130.192692323611 |
| CTSD      | 989.0602710707   | 809.577874019028 | 959.549658414082 | 2133.78836857697 |
|           | 583.053232396803 | 491.284423079101 | 516.992846073349 | 572.43115808475  |
|           | 1483.40077183826 | 821.922096305069 | 1076.05074395483 | 783.440408023061 |
| CTSE      | 45.9090659324223 | 656.355333007615 | 1440.41726370246 | 48.3892457696815 |
|           | 77.007438266156  | 67.5812474586277 | 58.8993834673475 | 52.8297102061403 |
|           | 71.4864243594056 | 62.5610562594275 | 90.807818984128  | 62.58750768974   |
| CTSF      | 110.048921728774 | 67.8208976798364 | 91.3890908971311 | 87.9098670472958 |
|           | 107.427186954956 | 367.685570437603 | 60.7992483126292 | 219.431561967403 |
|           | 100.178375869002 | 183.311305255895 | 207.768377497439 | 119.124583755587 |
| CTSG      | 59.8248482438562 | 58.1027665533767 | 71.5484567134601 | 133.541341560868 |
|           | 43.9450023643394 | 2067.66516256598 | 41.8315602975157 | 62.1934012861178 |
|           | 36.4476883897928 | 287.423909789368 | 234.615033303459 | 69.1099722732115 |
| CTSH      | 1349.09482344633 | 1817.14004766564 | 2002.0536042686  | 2126.41018877615 |
|           | 2911.10227993347 | 700.477686061791 | 1384.80615431656 | 935.815928529014 |
|           | 3244.27810937143 | 2160.22713775462 | 2206.44541412808 | 2448.64580552439 |
| CTSK      | 1516.33074288338 | 227.206974078547 | 86.7823828209946 | 1118.62223628039 |
|           | 180.916465721523 | 1521.20630233299 | 64.7023558190673 | 277.164276391513 |
|           | 70.0801020070064 | 423.804472820231 | 249.051882344771 | 228.984484917083 |
| CTSL1     | 1521.20630233299 | 276.86542239106  | 335.569876624791 | 3562.96193568469 |
|           | 484.482971152057 | 1087.75682788799 | 784.951880532127 | 1102.03940742413 |
|           | 249.632045894263 | 414.794323433931 | 521.029507993615 | 582.511224532378 |
| CTSL2     | 77.4999637278723 | 42.6939394537076 | 42.5406888281114 | 38.2041059863839 |
|           | 51.1368583672022 | 40.650742261428  | 54.6414321010929 | 71.0593419018503 |
|           | 62.370559099758  | 40.6022003765153 | 40.723990462047  | 42.2577689927563 |
| CTSL3     | 44.436995101921  | 40.716553247236  | 45.989212296035  | 45.0798408927912 |
|           | 40.148780650831  | 45.3882138838137 | 41.8315602975157 | 38.956280281655  |
|           | 42.357910063876  | 38.8507804383261 | 44.0409178714232 | 37.2810767789306 |
| CTSO      | 128.635811501506 | 98.4175422336425 | 141.154520472188 | 131.57403028894  |
|           | 85.7842344710572 | 180.916465721523 | 83.2162112994735 | 134.743068051122 |
|           | 87.7881690937563 | 143.173898886465 | 135.824520574227 | 118.115557136662 |
| CTSS      | 86.8262463672891 | 69.640968387662  | 86.7823828209946 | 481.145001682177 |
|           | 42.269054475455  | 90.1080159649841 | 77.4046818339539 | 61.130286531713  |
|           | 54.1745577382276 | 71.9124897002253 | 59.6608518093582 | 70.18107651423   |
| CTSW      | 43.844855336215  | 57.0082102559228 | 65.9476039189301 | 53.2046867327331 |
|           | 43.4544762830742 | 51.1621379498014 | 54.4934782594218 | 63.61404854326   |
|           | 50.5785738734431 | 61.0935621637178 | 52.4393177875001 | 51.6660481331154 |
| CTSZ      | 226.882600557693 | 176.07173250529  | 77.4246856935596 | 222.16475904496  |
|           | 114.230358276599 | 81.6949047529395 | 86.6798536307388 | 220.896780388946 |
|           | 72.5027069303875 | 80.191847692094  | 74.3766944386886 | 123.978615472736 |
| CTTN      | 275.061444728555 | 484.482971152057 | 327.878405194732 | 142.880684604126 |
|           | 366.228100574684 | 252.097980496533 | 375.697071471585 | 319.043862813161 |
|           | 363.215063520042 | 416.246271724181 | 356.133736281036 | 326.250872625748 |
| CTTNBP2   | 39.6609238036815 | 41.159706131351  | 38.8775560911841 |                  |
|           | 37.9875302985336 | 44.0451487108213 | 53.0290605707162 | 43.8206425661746 |
|           | 56.6910078150745 | 46.8873421271259 | 41.9666541498638 | 43.844855336215  |
|           | 33.5578650644246 |                  |                  |                  |
| CTTNBP2NL | 67.1387898740161 | 71.0340758556049 | 61.0370242377391 |                  |
|           | 61.2213001749372 | 71.9737561190706 | 66.8632294055679 | 74.416117986276  |
|           | 71.9771425105735 | 86.6516906104905 | 50.4234835272833 | 57.6831182451733 |
|           | 76.6707262000712 |                  |                  |                  |

|        |                  |                  |                  |                  |
|--------|------------------|------------------|------------------|------------------|
| CTXN1  | 543.975237512604 | 439.770250139925 | 97.5104526799755 | 60.4646208319121 |
|        | 651.078746026341 | 545.514314651238 | 471.734457300752 | 301.525915314179 |
|        | 240.934550408797 | 334.583159766096 | 240.431987635418 | 155.82546212052  |
| CTXN3  | 38.8336427948187 | 38.0834507308871 | 38.0057289062111 | 41.3027031037343 |
|        | 38.7864161493321 | 40.5281496800812 | 41.4742337714895 | 42.3110002461296 |
|        | 44.8997235283254 | 39.1177164316495 | 41.7627910693483 | 43.3262148375525 |
| CUBN   | 43.6706764143908 | 48.7847528954724 | 56.4779645313958 | 48.4916117779992 |
|        | 46.0977687311222 | 42.750861693377  | 35.4623691645629 | 44.9977782988116 |
|        | 37.1820543575123 | 42.6793753550854 | 37.4642807402741 | 39.9519547348106 |
| CUEDC1 | 160.187478921145 | 105.796515736125 | 116.426770366736 |                  |
|        | 164.917385239962 | 112.23915619297  | 259.033660186329 | 113.039124313172 |
|        | 143.042664581646 | 104.626873082138 | 167.799243454967 | 226.407063891022 |
|        | 171.705718494906 |                  |                  |                  |
| CUEDC2 | 207.943044411392 | 224.14182624489  | 312.984737387254 |                  |
|        | 226.057278804077 | 232.847812981531 | 292.99497881914  | 382.940842652744 |
|        | 211.451463038315 | 209.004669589169 | 302.79352975792  | 273.032063533642 |
|        | 279.448591201269 |                  |                  |                  |
| CUGBP1 | 50.0802438185974 | 67.1209520838357 | 60.5678281953819 |                  |
|        | 42.5193208629123 | 72.9700748169457 | 49.4157684139858 | 59.3549213146532 |
|        | 58.9081750508316 | 58.5285779508926 | 52.2256177934134 | 56.1822680431676 |
|        | 64.8254097948745 |                  |                  |                  |
| CUGBP2 | 42.175859643566  | 53.1278271804774 | 52.5786055354475 |                  |
|        | 139.989008296272 | 37.8305309577781 | 109.943883439481 | 46.6198823890826 |
|        | 43.1567024035183 | 40.2274522635576 | 60.9905272201951 | 71.1894129030602 |
|        | 52.1186591838715 |                  |                  |                  |
| CUL1   | 122.136867360309 | 93.1067450332473 | 114.039396407323 | 108.991044950132 |
|        | 146.969565088793 | 142.731630650904 | 81.0331497830643 | 88.9038123445083 |
|        | 159.306689057291 | 119.301672388541 | 110.626479311082 | 141.376779431031 |
| CUL2   | 221.972553229362 | 225.654863797316 | 251.854446030066 | 267.024267633341 |
|        | 328.855843739232 | 331.390452289344 | 214.073500272341 | 245.630020408551 |
|        | 315.960715273629 | 194.355765743782 | 204.344278991396 | 255.284866561352 |
| CUL3   | 45.9090659324223 | 41.8073910693411 | 40.4070046183108 | 45.5869891570251 |
|        | 38.6454098044474 | 49.641159251878  | 38.8417151851134 | 43.5544347011646 |
|        | 39.1790517315259 | 45.4614234442527 | 47.6125796208753 | 41.4508241771315 |
| CUL4A  | 224.914980996667 | 165.548537317115 | 202.833844963097 | 192.700843009002 |
|        | 251.105933757167 | 213.590067519021 | 222.453547273598 | 182.343696914747 |
|        | 215.08694410402  | 165.613176704286 | 183.820203505757 | 186.600931545083 |
| CUL4B  | 72.3388488936832 | 74.0039764902057 | 64.6446465846487 | 91.0346886951891 |
|        | 78.0077300979911 | 89.680151549258  | 72.6959688212342 | 74.4508307047509 |
|        | 66.8632294055679 | 96.0236731791095 | 75.2391243965793 | 90.3041737295567 |
| CUL5   | 181.45962058846  | 252.949225605064 | 171.623830248512 | 194.395766807005 |
|        | 222.92930674999  | 338.475097952023 | 193.262615637464 | 175.909221705119 |
|        | 160.283895105835 | 256.364301298918 | 233.96534264787  | 221.123510823097 |
| CUL7   | 51.2851682978581 | 46.9919960628953 | 50.0748292497578 | 44.9370339275041 |
|        | 51.940083408061  | 42.357910063876  | 42.0605906240248 | 45.642304356051  |
|        | 42.1594905198929 | 51.3351387089044 | 52.2229654768933 | 48.5123041297835 |
| CUTA   | 786.57695312967  | 470.676006277762 | 618.293140877956 | 510.525676243746 |
|        | 880.992328229414 | 514.261598258395 | 796.359355922952 | 534.629009719855 |
|        | 497.290172759099 | 610.853753376105 | 547.729200972776 | 482.5816387921   |
| CUTC   | 72.9154861179393 | 87.6763065012524 | 114.611557317665 | 122.863635062993 |
|        | 82.0149542477384 | 326.055799445169 | 100.756165194192 | 71.9000032422349 |
|        | 103.869437847206 | 225.251124162268 | 208.7739716139   | 208.743876555152 |

CUTL1 172.237164781821 220.217797955745 194.666769955149 192.264432082651  
217.995354056264 223.316311787046 129.414877519657 197.13726107504  
226.168990555083 189.737472782071 245.127632785841 226.567000755017  
CUX1 44.2350046179299 44.6402215707065 46.9578963946094 38.0365987358005  
41.948762493127 49.5888934105046 43.4870236357993 40.2906799807722  
47.27543600687 41.1678908661272 42.3440399888092 42.7303139017786  
CUX2 32.5418171758086 33.8237407699472 43.9450023643394 42.8235313007746  
41.1868052124344 39.3841861812262 35.4623691645629 36.1375121409002  
35.5220586859301 39.4710743516517 43.7585538437696 37.6557714476853  
CUZD1 41.8409927585705 49.6841415268611 47.5673419710251 45.7397504535169  
39.7568367479301 46.0364000143537 42.629412460409 41.6466169548846  
45.0997987980157 48.3693338695392 45.4799270968969 45.8546719310325  
CWC15 257.194689822426 217.995354056264 249.776078532596 295.848968688724  
265.520773157991 333.566613571224 341.078728185917 345.615640348066  
340.662853333208 253.267901237295 248.012529897462 368.913147706435  
CWF19L1 369.717462266442 360.523229691604 361.776841675393  
445.421601813221 368.078954546259 464.583498621466 579.795835370595  
445.421601813221 264.659866487253 412.29192088057 397.108901822735  
291.42149037871  
CWF19L2 103.945335792682 87.8681250426295 83.0959169307948  
107.111886993156 105.739423435604 169.554408876006 82.9431583622036  
163.917208464731 104.409397223301 143.173898886465 155.942366087388  
131.496769528338  
CX3CL1 301.904682664871 70.5699797830702 162.352052340273  
58.5406981871153 69.1862663389904 235.925374041038 333.648836970147  
101.516595046503 47.798305839406 154.707548614663 185.109323245018  
93.7924763988692  
CX3CR1 42.3620028137457 52.0268699306396 51.0539624358342  
64.6945454069792 47.3791873993182 51.702461863489 54.6414321010929  
43.4544762830742 45.2421183842044 63.1394716239975 51.6869155634183  
44.0246886382298  
CXADR 205.314410185216 695.255317861845 1055.35144552575 45.0798408927912  
926.61614755153 192.240593720489 595.790464730847 429.329962597147  
1180.7204565402 831.578043520215 866.712228831149 793.225863118464  
CXCL1 43.2724556187214 44.7829632472754 58.637422084759 194.012210675469  
72.1154333023225 38.9378717994178 92.3034609409756 52.8622615027833  
52.7512110769042 38.528621456378 40.3452320167286 39.1553169409075  
CXCL10 567.827069916244 244.529657015078 230.117814622646  
376.453560620912 65.9413235523618 84.1922656126304 98.2843999216669  
241.455752070163 54.7033747046992 52.6879797806876 66.8188271427672  
47.1060577218993  
CXCL11 41.9407041937973 42.6022652963326 39.8299340037009  
39.853175885492 41.0476065156912 40.244271403831 41.7614975630362  
42.9301944191913 41.9083581529276 42.1317134987795 44.057571056322  
38.4829727716328  
CXCL12 196.17328008185 66.7256057011273 62.9313387640547  
164.435300801872 49.8966674037224 960.526372655577 43.0119734905129  
62.7950861902067 43.713206937726 205.187554095744 199.57367025082  
79.2525964926483  
CXCL13 54.3554233228353 96.5102825310977 61.5080959417997  
311.810240385503 37.2567512265363 36.2768299545794 44.0687697278114  
49.2019743609873 46.3203995372658 36.1550293353654 38.5668610487033  
33.3192849177028



CXCL14 72.1066584199167 393.648308810931 80.8400209263587  
72.4834467838798 125.786923817078 260.010554284184 46.1634822993009  
143.653706909456 84.8235093165193 94.5788538659874 91.1363393944977  
68.0751111916102

CXCL16 374.601792595646 214.342804055754 236.307055572306  
1050.05355467301 181.298709635609 192.763875975315 257.194689822426  
295.841196113053 203.53267380432 223.219262492785 214.051824405993  
197.841210387578

CXCL17 117.20232751191 48.4980626712175 190.977045076469  
48.665578118898 49.7235523248653 44.5544727111028 41.0381860307445  
44.8997235283254 180.475056805817 52.6879797806876 47.0110068985119  
55.8775622338124

CXCL2 46.9939712192224 57.1595768494068 79.0962508551502 895.110715324701  
59.9326265577462 168.91210897306 187.656257079035 89.5130163419167  
40.8970401536578 34.064698871541 38.2795150354677 39.4490233720848

CXCL3 39.7576136507593 39.5050383901884 41.8751578329365 32.3671711013873  
41.2740822675592 44.9896851005259 36.4098694708483 37.33030683349  
41.4636047919453 41.9666541498638 31.1150868775826 36.8690774823319

CXCL5 48.4459451445651 45.0905928998779 133.163926420863 205.650076927315  
43.004943518025 41.2567470068038 95.8734933265537 49.1399035787209  
43.0456011922275 38.7008388965825 39.4749602565407 37.5222959113204

CXCL6 44.1737502492846 51.3800036046133 80.7338782543351 130.455608913636  
82.1344514651393 45.5758521267508 283.21175871127 60.847641921163  
169.75692324104 43.401782064778 41.5668884168669 46.0106098064475

CXCL9 400.327164003217 183.613579501306 89.2285288333749 171.800185639868  
45.3675390992851 43.8582747295766 57.51482768194 217.78290286894  
43.5669306063196 40.7063426028871 44.1148826235374 40.7704587752083

CXCR3 40.148780650831 43.7644428186265 50.9010149857308 64.898351831341  
42.4864576619427 38.6414316877471 54.339958888486 37.4484310268909  
41.2870505273664 50.3388505346542 42.170702295259 33.939263369489

CXCR4 145.883224917856 122.702789229752 147.727354881531 1305.35453202355  
78.1761025629963 74.9661773375536 100.066535982734 101.39385858723  
86.8113410380324 51.6778366958973 70.7045582269595 58.174555206394

CXCR5 44.5798743103596 61.0144918827511 52.9111155236961 66.3188075271379  
47.4548471240051 50.2549436338147 42.1372626664516 49.7309743973184  
44.5678064264717 53.3577647219133 47.5733603903505 44.7401523707775

CXCR6 55.8218917166321 59.3406363431414 51.9214790114499 117.948047796034  
51.2525124735102 53.0290605707162 52.0942589368478 50.7364620410977  
41.4636047919453 47.611018474151 48.6184776976167 44.9070250604284

CXCR7 417.4609354305 340.962490240304 1093.04440713629 288.508774004052  
1111.13061382818 1478.26733379357 79.8456892021695 393.648308810931  
198.821443323024 644.368005872231 484.350946851556 714.990611155096

CXorf1 41.3387790895716 41.7337506166619 43.0016969050339  
43.9282059368202 40.8873907150245 45.3882138838137 41.9393838138203  
39.3709357615493 40.9901805728485 42.9866214102525 38.1835938174625  
43.6753843488695

CXorf12 79.4528447794527 93.8009890556664 81.1249338842464  
110.25582862843 87.7337304906377 73.1169003714219 116.122324921267  
78.6911549149983 108.815245119101 87.3815040456105 73.3321469094819  
68.6047087267554

CXorf15 44.7915315085948 52.7493349111555 59.1040441894478  
52.6947911480086 71.0593419018503 48.9826868640753 64.8367546135053  
46.7980335276155 52.0583273941813 41.5435611403119 42.7275315121163  
48.4535991392809

CXorf20 37.2474303302343 38.7344853699576 38.1421709520616  
39.6292788039793 41.5668884168669 43.1180113655693 41.0381860307445  
40.6723334103791 38.6322728994674 39.6251842352088 38.4251036088595  
40.716553247236

CXorf21 38.7229679986571 38.7344853699576 41.8751578329365  
38.8964578286293 42.5449473689701 41.408887993053 37.5424455284588  
45.2806199505029 38.6510172759977 39.3113207075992 39.8184668132023  
41.2905987859365

CXorf22 50.0466349801009 40.7952353240579 41.6977706798234  
36.5393857306744 45.6895223823001 42.9695585740813 39.7576136507593  
46.4672637826582 45.2897806651929 37.8217989841918 43.844855336215  
37.0953622406687

CXorf23 51.2851682978581 46.9919960628953 41.2365089689635  
47.9915414951747 38.745552403895 58.4435847520801 53.1884505015411  
58.3046521633424 57.5883027758003 45.9004543328976 57.0154839296649  
50.7487159427973

CXorf24 42.6036491382658 45.1390218677367 42.1901757067073  
40.1362682639916 40.4321207743917 43.0144844590744 37.7136011474903  
44.6560353921013 37.6383530120621 38.8173773425835 43.9802831041664  
41.1066323911308

CXorf26 118.186590679218 172.39907939484 177.261319004133  
177.584394977912 119.493400362694 146.133951379664 154.612425659555  
222.368324930003 197.232697438521 158.091115152384 183.690616959682  
190.053043382767

CXorf27 53.3059058105836 41.2598458726002 41.785676764591  
40.9607305725196 46.0043807840705 46.7800033479223 46.0228732507872  
47.2009420656854 40.9901805728485 44.4652605017595 43.9450023643394  
46.917149434588

CXorf30 41.3387790895716 41.554942319225 44.6032218589199  
38.2041059863839 35.9058393060637 34.8956628705329 36.7356360093603  
40.5158867964016 38.5252456306656 32.1011040606811 37.0180934800573  
40.0557788909923

CXorf34 157.658760470424 154.612425659555 139.543015878846  
109.726577835621 96.221685383385 113.377818029985 205.991317474325  
182.219366179899 121.36340610316 123.46775722643 165.322633260592  
122.720768249799

CXorf36 37.2851729259549 37.8685585043426 42.3536549114165  
36.264823544143 36.2691013181987 37.9951997351435 36.2561152084183  
35.1738399826814 37.4059035942248 39.1621898366355 37.0180934800573  
37.2291018661279

CXorf38 99.9752275166514 204.039190380778 205.991317474325  
220.79051545138 92.9747592911324 81.6949047529395 205.991317474325  
203.228211195516 133.244526666651 77.268323196327 99.1952492360239  
121.782045054657

CXorf39 66.6547247910487 50.8812920005251 58.2986825661503  
50.2163892855092 48.9627346956003 43.5752393599169 65.8986841086198  
77.0262811825953 85.1114448808779 50.22432299342 50.4740079109854  
50.2163892855092

CXorf40A 130.985178898633 130.615540145155 130.455608913636  
122.863635062993 137.720182545143 102.863599315528 144.515737827731  
186.818097299665 140.719373122712 86.5926014007562 93.1238695478498  
125.81889994067

CXorf40B 80.3730667493235 88.8039637390786 99.4184778430267  
88.051652677564 105.589475270494 76.1991031349451 104.8505815954

101.766641669845 95.2956103624468 65.3377940117969 67.1477341610979  
82.1365334012643  
CXorf41 41.8409927585705 39.7835513496873 38.4043916290561  
43.3078542962968 37.8679241954337 41.4508241771315 41.3594868055879  
40.4359177791566 37.10170285405 44.7958122466628 36.43924066428  
38.6454098044474  
CXorf42 49.4151347850687 48.5905518770847 43.6670755115848  
47.3574589211166 40.8873907150245 41.554942319225 46.0228732507872  
44.5029690493211 43.0930293831497 40.8970401536578 44.1148826235374  
43.6753843488695  
CXorf45 61.356483470053 84.0691608193405 110.540953771795  
72.89602312859 72.5027069303875 64.3383155834968 49.2546642180676  
62.6984594468418 61.9682048429354 80.2774079897733 74.6474346708746  
90.2425981161833  
CXorf48 42.4763932431258 44.2384941015805 41.5529539017093  
42.3887531663733 44.3557408297309 41.7994927517569 41.9918605927928  
40.0842340147135 42.357910063876 41.7405682794166 39.9899430628542  
41.8291484190524  
CXorf50 37.4554876386402 41.8073910693411 38.3166554965434  
41.5464765641928 33.5412189543102 37.8102105794655 35.9894133432376  
38.5457716679071 42.1594905198929 39.5637454855233 39.6403089864678  
37.8490162439785  
CXorf55 39.6609238036815 41.8848959280916 45.4865173433646  
44.4367387274922 41.7929491793697 39.4953494583071 41.3594868055879  
38.6454098044474 41.9635525160083 39.8873706855774 37.9230440150891  
39.6352613956998  
CXorf56 59.7179445506128 58.6249721386149 52.5353664902258  
49.5424425850549 67.1278109419819 61.2387559102636 56.9320717885002  
58.676230030835 63.3694113050568 44.4652605017595 49.8393069675192  
60.5948704279864  
CXorf57 49.540449125788 376.289659542649 559.9670724278  
75.2475238554276 316.073008787218 95.5920087912438 490.652353306749  
552.162906190653 524.972936438175 190.592556065939 176.064476306748  
197.325473090277  
CXorf58 41.8409927585705 38.9338521051669 40.301483914446  
37.9875302985336 37.3508690072156 39.4953494583071 39.0458123429605  
33.6816578730693 37.9273653326866 38.3092241935352 38.745552403895  
37.9607839934735  
CXorf59 33.0463640202858 36.4002279956519 36.6522278218553  
37.0732977341185 32.5318884330468 33.5578650644246 39.4600924554505  
36.6452480995946 35.7973685350741 37.5343260962758 30.9159908723475  
38.6454098044474  
CXorf61 58.3702889417801 40.5400384479766 39.991353369336  
38.2041059863839 38.3561682218911 36.1190722948669 37.6036146841933  
34.2814697823693 45.0997987980157 38.0078357808393 37.0180934800573  
38.3291713594599  
CXXC1 354.973265582488 922.047328788961 1021.71286017481 470.453915397461  
265.101739636461 317.127679512963 779.028332922339 374.978401470437  
836.472724085903 802.036670929858 757.833254346899 559.296669575666  
CXXC4 31.9468644542969 41.4508241771315 39.1799070031819 37.0732977341185  
40.148780650831 36.8059561571675 39.3585350448719 29.9617615620508  
52.2631308081333 39.7835513496873 42.911855821602 37.0953622406687

CXXC5 2077.74475301595 242.396401163598 387.039093527273 480.260282672252  
200.019523376661 320.889609846069 229.428422408702 416.149496747947  
564.468049419762 239.590143292142 263.44529683749 160.283895105835  
CXXC6 46.263826584899 46.4861258030402 46.8267540220952 44.6905691366696  
37.4470183315826 41.0582900711341 42.9803717121865 39.0620487644635  
54.7033747046992 40.1179210534118 42.5426057453993 41.4508241771315  
CXYorf2 49.085741080241 45.7317208802318 50.6004078448405  
54.4586176399381 42.4864576619427 44.7804080899431 51.9421032049606  
61.8665316900291 41.5635499110307 53.0357938671646 48.1352470945488  
45.0035308952466  
CYB561 84.5678487053881 122.674230293606 92.9323002425821  
57.4595416719581 101.156215957297 66.3558126170575 105.598516887691  
102.380096190518 126.528654651607 75.7801512652102 81.0994894489593  
71.3068231787348  
CYB561D2 133.229859346689 207.087723777954 126.017900743748  
266.717224821545 203.092045210928 110.757899996422 240.11295387591  
139.062073456923 197.232697438521 142.846665249354 155.225701588645  
115.064217549212  
CYB5A 247.723546145775 1450.53108586858 1621.89443989657 278.303493506139  
545.514314651238 853.464809072841 1932.2647526188 746.252816568691  
1561.83892117664 1041.84536202049 1254.34397143795 2167.91218703382  
CYB5B 1164.71243740122 1087.75682788799 1756.86714809925 681.474524031866  
1106.57048989685 728.679189702033 1382.25775340179 1252.94510628089  
1570.45778081591 1046.42391243532 979.468753716758 1749.06320703181  
CYB5D1 129.785929766258 163.43197105141 69.3468840908665  
321.454824353597 239.924746743429 191.730944258418 121.737071786167  
192.922622120507 84.158736606096 138.997932973328 135.308001652191  
117.355761277966  
CYB5D2 132.838429478396 235.593721159442 245.996655628334  
153.153205095999 97.6205705034407 197.205643078662 264.855020003755  
136.650986373497 137.302487233881 155.075313035867 163.66696652324  
131.942576661072  
CYB5R1 177.779514321673 169.168332370229 1039.06999658544  
175.009248614892 273.934014944673 158.334581991361 151.621572940457  
238.510952165358 309.344766670365 1026.51177853708 851.813216452015  
799.803676957263  
CYB5R2 76.0532592222027 63.2804984998739 116.122324921267  
48.309866878365 69.6330393135101 50.560825686187 129.143252341926  
76.8393340617473 111.202737864873 131.537639104397 94.8036856848998  
95.0278507757286  
CYB5R3 1094.37961997684 1114.15989325456 1457.72260892651  
1064.35745220225 936.978983469829 2077.74475301595 933.968759959712  
1018.35211991691 1497.73669971925 1907.47560253019 2113.73880184695  
1683.24873205783  
CYB5R4 65.7587943905649 108.213380368446 69.1938570643524  
248.414210905199 49.1928206164702 90.5359675350156 84.7782034884529  
100.370937669662 85.3718124658316 56.9463858443402 77.4625808567081  
80.8366627364071  
CYBA 1588.70376317303 2911.10227993347 2854.82112538867 4200.38495514552  
1615.83220398811 1325.2479053325 3776.54943917367 677.668455095171  
2733.80542760533 744.080606078086 1317.29255644089 1057.44729389649  
CYBASC3 174.685146336531 210.807094064209 200.318682162912  
339.262360833465 339.601844139729 136.711122812062 272.545033107746

202.192457390868 191.182530250155 229.971492699272 162.000275136397  
 192.732356915298  
 CYBB 92.084526929319 92.3659612653822 90.1284518302601 723.210613328966  
 53.9074374788981 164.722166245312 78.1623301184313 78.3542840447759  
 46.8873421271259 45.9004543328976 43.7585538437696 61.7502624458447  
 CYBRD1 477.558242266308 134.300169542594 85.1661952927159  
 402.221227674218 119.572497267498 1731.19220270448 84.8808332740321  
 178.881586334601 126.930102684077 885.224377292125 702.737741114234  
 755.106456358949  
 CYC1 681.474524031866 2528.6392272518 1069.3975598703 643.491217668415  
 1554.42895572029 1009.47177197543 1157.65264077595 561.2769907009  
 1932.2647526188 1330.19215036764 1214.73798692268 954.116675685628  
 CYCS 63.1291723738553 108.649424858333 58.5212649095879 65.3191216270241  
 143.399636653204 172.777241940677 63.1604223919703 51.1694248620208  
 86.8463723709337 91.9185612536409 105.814959179397 95.6731932757489  
 CYCSL1 108.649424858333 103.513421757522 119.846620703059  
 151.111664091983 194.951677338012 138.581471125405 149.551650453179  
 182.079641528208 172.192366002756 103.001949900533 107.818253499703  
 189.451890957713  
 CYFIP1 151.740176274202 177.212612563444 149.515611848932  
 167.774103692331 137.286091889421 148.608392563633 152.294357984689  
 104.950400251642 147.9291840243 90.6191520659197 103.695493532556  
 87.0468045816651  
 CYFIP2 68.6889514573956 111.97030382494 136.613915120582  
 201.959257379662 66.5187917407182 115.277469628296 189.984886903595  
 226.970981973829 80.1505160355175 170.327588764719 167.702870734995  
 414.539381761279  
 CYGB 121.744701580607 251.803102904399 183.028254350275 205.154378853199  
 264.718875269207 424.085665569421 42.4939802311136 261.929727465462  
 77.4186160113063 564.468049419762 833.136660528149 242.899629257173  
 CYHR1 108.156702405177 79.3971417347713 81.6486527718661 52.8502823653368  
 89.8035133597498 64.9498081060676 53.3111230705754 52.8622615027833  
 77.7907484334847 83.946822476147 79.2701322339022 59.9326265577462  
 CYLC1 38.4330755397458 39.6493706695391 43.0016969050339 43.3078542962968  
 42.9655396732962 46.0905079010237 42.6913548400127 44.8727287473605  
 44.619512785899 45.2023300009435 45.447310733898 44.5432192783161  
 CYLC2 51.0225132036905 42.7775752471711 46.0727230219512 63.7909104347097  
 38.9496515344837 48.8744644207821 52.8496345990125 51.7538628098347  
 46.6944238390932 55.9283039581662 52.5930185400362 55.7067742610401  
 CYLD 52.109723558511 55.5294887653184 60.4347860127923 73.5834042105313  
 45.2556760873335 57.013135787334 48.0283573444179 51.6660481331154  
 47.0804681460898 55.1804535845496 60.3254877099749 59.1514832343922  
 CYLN2 123.25443049561 77.9992448636936 79.3066495980045 110.112236384679  
 82.7394574977114 116.900364583878 104.932630862885 139.177720567217  
 103.264100180823 118.93749473833 142.846665249354 86.8194399159684  
 CYorf14 44.9370339275041 61.2691385007595 43.917817324545  
 44.0991023527481 42.3536549114165 56.566634814242 81.7434024567356  
 72.5835488194631 53.7886950010803 67.3601172371813 65.13722010157  
 65.9350437838896  
 CYorf15A 68.3234331335073 225.201522281399 47.2055133646385  
 151.99110418225 56.0477607422828 119.474339360208 210.768576894328  
 207.087723777954 151.344720108793 113.26670675749 118.951970882732  
 171.5709313654

CYorf15B 56.9360840563854 90.500550952567 46.4150464549477  
74.1068645821427 48.5000946421718 54.0104259381604 73.0433648756396  
102.818879165949 65.9254098858352 84.3672289945664 74.2180011215707  
90.4622684763614  
CYorf16 42.9104454767916 47.087835967892 43.4709415392696  
46.1673159982664 41.0885562160946 43.7630587657205 51.4349390827895  
45.642304356051 43.9450023643394 42.9866214102525 41.9083581529276  
49.3087627580849  
CYP11A1 126.204310123186 47.4740726032707 50.8303921211581  
48.1662933382789 96.4112435621587 63.6894484284172 61.2183034191703  
56.4779645313958 59.6700171760426 48.0211752672327 47.8988096575648  
52.3896785600751  
CYP11B1 40.308802735799 38.7578265341627 37.5222959113204  
39.4569929845912 37.10170285405 41.0012755104374 42.6913548400127  
42.7965563818112 38.9496515344837 39.9519547348106 39.8577530602176  
42.4607795638552  
CYP11B2 36.9060997041453 38.4330755397458 43.3085358214154  
40.9607305725196 39.0564222526273 41.4508241771315 39.8695929627783  
41.0381860307445 43.1805016690297 41.9666541498638 38.8507804383261  
42.0424641526302  
CYP17A1 34.1336988442837 39.6995529770239 42.2577689927563  
42.2496337895968 41.0885562160946 39.2248354955045 38.8417151851134  
42.5435283762933 41.5635499110307 42.5664883002833 38.8507804383261  
39.3575468494941  
CYP19A1 39.1094280636983 38.6633191400449 39.7411455670172  
40.3180310664156 39.4693871570028 39.3483872785093 43.7570510687482  
38.610211769318 41.5635499110307 42.0217776707284 40.9624000010053  
40.3691324547049  
CYP1A1 35.4287975493553 40.2493681589104 37.3687900733549  
44.7980740332174 44.9936360641969 39.3841861812262 2721.97551918611  
42.5435283762933 43.2761454096265 805.309720893073 108.945545005203  
1425.37639004849  
CYP1A2 37.4554876386402 37.10170285405 40.7620472083159  
37.7469621225553 43.7517118200398 41.0582900711341 7075.82842238887  
42.4580504587581 38.9834959368496 55.4037482627222 40.6373400186325  
51.4308501933893  
CYP1B1 145.561345203804 60.7495043977707 51.7138050344355  
396.167219131922 45.2556760873335 301.728842562175 959.549658414082  
63.1604223919703 60.9594847577747 771.554891868456 144.427680369554  
973.363245512859  
CYP20A1 124.998771394658 155.310176479895 130.313381811168  
142.048367760597 99.2662616001616 152.565430903885 86.8596934326046  
106.454367084321 122.988056802699 91.0309075163394 106.816835590007  
138.292681458047  
CYP21A2 60.8357760968871 47.5647821785529 44.1452943804044  
42.0102671859606 40.148780650831 57.1752846228778 45.3597029614942  
50.0526763693329 40.5912213523345 47.611018474151 43.401782064778  
46.3411353377615  
CYP24A1 40.5654775358427 44.2105195734073 104.950400251642  
38.6414316877471 39.859345745831 42.357910063876 39.3585350448719  
52.8622615027833 86.6910280940418 47.4767851750188 66.5539062525344  
98.7331384143685  
CYP26A1 42.5478935075651 40.716553247236 41.1742244762318  
75.5510570035251 43.4805066565809 38.8336427948187 41.706879587091

39.5954353681031 43.9104473952446 40.9470770920425 41.3234441859498  
38.3736012215232  
CYP26B1 56.6086202928268 74.9059650336395 45.1569741609597  
61.8997157694697 44.9936360641969 80.8333046859586 36.7356360093603  
62.7950861902067 41.074824727477 50.0564735608363 57.9864701726379  
87.6598268114592  
CYP26C1 33.0463640202858 41.4508241771315 38.0452862258803  
33.1137701681495 39.9697332660833 42.6575535390785 33.2425023465738  
36.2539950294089 38.9006788676407 37.6383530120621 35.2339574411711  
35.7451401627836  
CYP27A1 204.659954879641 81.1416376689959 68.1780382173625  
872.305108096296 59.6922302604696 236.727577348109 202.192457390868  
94.2678678253657 54.1745577382276 294.372319595103 322.440680131096  
166.652850759559  
CYP27B1 69.5462764096011 80.6083247572711 66.288032400574  
115.299308625328 63.25187762908 44.0804700754786 50.8388984085636  
93.3718038663074 60.0736861987141 48.1392888470269 40.3452320167286  
50.8442982601142  
CYP27C1 52.502055890816 43.683792219729 49.3000844711116  
33.9645433044281 37.1565984182084 43.8582747295766 39.7576136507593  
41.6466169548846 38.7298222155532 50.6486940895674 40.1742127891824  
63.9371474698484  
CYP2A13 42.8561766050988 39.5050383901884 40.8420925848403  
45.5869891570251 39.528971131769 36.9625898230551 40.0052661202207  
41.0381860307445 41.8197029429821 42.0621425894624 43.1724740315182  
39.1553169409075  
CYP2A6 41.1523487516364 37.1685072112618 40.4882741869718  
42.6913548400127 41.6806984441849 43.1826328292558 44.6032218589199  
42.8482181313226 43.0930293831497 39.2623423164488 49.7363778831003  
42.4607795638552  
CYP2A7 39.1059888887285 42.5269793679335 40.244271403831  
41.8778873678551 41.467005949568 37.5887129572848 39.7162631015511  
42.3110002461296 43.6670755115848 44.4652605017595 40.4094901248527  
42.8864415494484  
CYP2B6 40.6957787921451 39.5050383901884 38.6414316877471  
38.042028333747 39.859345745831 43.9366081640576 39.7162631015511  
39.9941474864076 39.1467972692656 39.4710743516517 42.7775752471711  
43.5738557773903  
CYP2B7P1 41.5421429082231 39.2907645923217 40.6737160001291  
40.646702696033 43.1252272136667 41.159706131351 40.2154497375715  
37.2237132058632 38.7298222155532 40.5090849993014 37.3687900733549  
40.2669497398702  
CYP2C18 45.9090659324223 184.750252804038 45.2313723727673  
45.334106390212 39.4693871570028 43.7630587657205 46.1634822993009  
43.6434576713809 52.1186591838715 45.5776159432079 44.8872784170036  
40.0557788909923  
CYP2C19 37.1485601150873 42.9358255168086 44.3344900481112  
38.0958223740111 43.004943518025 40.7616966228404 43.8206425661746  
40.6171774724171 42.7150227340364 40.7063426028871 39.0550139257658  
41.7575097298927  
CYP2C8 43.0930293831497 45.5842286511645 51.7138050344355  
33.4819739460148 40.5710637884029 39.6251842352088 41.8315602975157  
40.2382908228517 34.6720534245631 55.1089864632456 45.0589947942306  
50.7487159427973

CYP2C9 39.3709357615493 82.2766822827861 39.1799070031819  
40.7481155008596 40.3452320167286 37.2686490268265 43.1931731665131  
41.6466169548846 41.1742244762318 40.6022003765153 37.2892641289258  
41.3481355128089

CYP2D6 43.1001512135266 40.5852276210998 49.501977696496  
45.8102081251786 43.004943518025 42.0016830644258 40.3302268293707  
42.4580504587581 45.7873395324682 45.0155543555707 45.0985088502363  
47.1712755747298

CYP2D7P1 52.3660712483179 43.1464706017434 43.0602678767669  
50.2163892855092 60.5806691666221 43.3269087731399 47.5130990528612  
53.9918882088235 48.3686935595826 49.0841460667818 45.0589947942306  
45.6692241948108

CYP2E1 41.8409927585705 47.6229101519945 42.640829914102  
48.665578118898 43.6587492470348 48.4758590019384 42.0605906240248  
45.5581356216957 39.4762546236449 59.6863210839828 54.113533179847  
50.4847465816184

CYP2F1 44.7044140979108 41.6466169548846 36.1042012504758  
38.2599935139101 40.5235471987417 42.8598805316863 42.4939802311136  
40.3357777530419 41.2870505273664 40.0557788909923 39.5792604499113  
40.9149601380325

CYP2J2 306.294404016622 987.427672417105 377.626746989976  
44.4367387274922 303.139550962377 83.3664149246525 363.269936098507  
113.528908699366 991.630429625437 637.565156571985 571.790034754076  
879.708199333257

CYP2R1 86.2021418088902 89.2913927776683 161.974232441096  
114.124846622876 103.968071466212 79.6895408438974 72.8653205184014  
76.4637616585578 115.328304312071 125.393232344778 90.2624299533482  
99.2432911346944

CYP2S1 71.957942079488 68.7436392042714 77.4906145838899  
107.005820817545 48.7814131120945 38.6704566269103 54.2445399731644  
76.5699943825825 42.8036731479932 194.278792348966 60.9446532180211  
195.765247956108

CYP2U1 42.3620028137457 41.6069493017095 43.2721716572958  
40.6892234267786 40.8873907150245 54.5222652584532 36.7356360093603  
47.9942520395434 50.9612733880858 62.3556396662215 53.3078448066074  
52.153603364404

CYP2W1 34.3473914754963 34.15544299189 44.1452943804044  
32.9046688061235 42.4864576619427 43.9724628401189 39.7576136507593  
39.6474008369935 38.9006788676407 44.6918600441328 34.174642681781  
31.9386613757097

CYP3A1 44.7044140979108 51.8610060995363 48.8623729374733  
43.9282059368202 40.7779767565889 62.4450952595811 43.4885245598939  
38.9271399577966 48.4869909888679 53.9412154719864 45.5707650534259  
49.1200355938198

CYP3A4 39.5676051939342 37.1685072112618 41.437237454134  
34.1051821768421 35.4484652445078 42.357910063876 38.0598374201407  
39.853866204927 36.6312676076142 43.6033221838149 38.1835938174625  
42.0424641526302

CYP3A43 43.1267841876606 42.0500582486532 41.6977706798234  
42.5193208629123 41.0885562160946 39.0620487644635 42.3194600586894  
39.8016018354453 44.1519466943185 43.781101409552 43.9802831041664  
43.1235886043549

CYP3A5 92.1908585323292 89.0203733091224 392.898761909406  
42.9358255168086 59.8102324370568 48.7781962164988 42.1607322031054



152.555556133364 292.99497881914 349.90835241442 265.570814613305  
343.382663050351  
CYP3A7 43.5710871617107 38.2263227947189 40.5734458834617  
36.6501141438378 36.9060997041453 37.7000400506818 37.2892641289258  
40.931294690669 45.6582729799009 40.4136535208406 46.4205654140754  
40.2669497398702  
CYP46A1 43.2724556187214 39.2907645923217 37.9482157381008  
41.4273122914951 47.6884372645373 50.8533737532786 41.253645578517  
40.2382908228517 38.8271346375425 43.2988017098387 40.547835538778  
46.6397391251762  
CYP4A11 37.7384958256497 38.4330755397458 43.9450023643394  
43.5627649099623 42.7107928951766 40.8634043028528 41.0381860307445  
41.2551966132486 44.2607789091176 38.528621456378 44.6286581923295  
40.6614700944853  
CYP4A22 41.4508241771315 38.1835938174625 35.6765064335425  
44.0451487108213 43.4885245598939 42.2577689927563 41.253645578517  
40.1474543172332 37.9837233601316 37.3179578037963 39.6403089864678  
37.6557714476853  
CYP4B1 139.49198349194 839.850453078119 453.652548085387  
39.3750969348308 245.630020408551 114.643475335002 313.528012643479  
412.421643885499 1012.91803181784 304.877336204875 639.391575249793  
209.178131628825  
CYP4F11 56.0477607422828 82.5344501505114 231.304658157247  
38.8495095797881 143.563236821003 48.3686935595826 101.716697533604  
134.83544047809 88.3799086910448 139.814194128548 122.15017220566  
61.9882398986333  
CYP4F12 70.7238101239421 317.892699374852 383.705244574204  
43.3078542962968 333.122044191102 111.532958750074 326.70962514228  
139.436084808369 573.832332097619 1237.93130196998 1395.33665255999  
353.751797948675  
CYP4F2 38.304249186058 47.6914221838216 61.1745030100746  
38.3668692419741 52.6226745117396 42.9695585740813 46.6267962186599  
50.9933795450314 46.4164127487052 50.294087888475 41.9083581529276  
39.2469742642337  
CYP4F22 49.085741080241 925.486088550061 811.142611128461  
42.8235313007746 397.798003824167 94.7008981904016 667.583623414832  
149.260740603715 464.209794165593 617.539783972955 1416.47763911039  
200.450523205251  
CYP4F3 42.442231667357 54.7855575216687 56.6458456890715  
82.8888969977394 52.8190882379316 52.3746819771982 64.8367546135053  
41.6466169548846 112.414189401193 67.1926218405833 80.4601303882402  
59.7999569757275  
CYP4F8 44.3355304829989 46.7591817286632 50.5089777244781  
36.6501141438378 99.8699868526053 36.6271061451613 92.4534854832186  
142.545268664218 84.0388582916959 51.4454142248566 51.5822637582617  
39.2469742642337  
CYP4V2 136.155022329495 79.6516904169771 72.4913548133238  
147.388500451427 112.311249826645 188.008141649466 86.2118355769367  
99.2432911346944 106.799510275842 277.993522959259 191.141778714144  
121.259683158193  
CYP4X1 39.2076937845359 50.0642388903563 173.677648729894  
37.651298468202 85.1661952927159 63.499841172847 48.739479557328  
180.349984862124 161.948193932343 96.1825551158198 83.247335725921  
87.5759422500374

CYP4Z1 55.4452315601595 39.8463497940802 46.6588655218735  
38.1412400762431 47.3716857595991 37.8481704275343 42.7431359850339  
60.6168105212811 44.4395580493118 39.9612063794301 41.398124064512  
41.903370741929  
CYP4Z2P 53.6429962450784 43.2907292669418 48.9741705041438  
43.9551059970289 47.608637584681 43.9724628401189 41.7513290046251  
58.6249721386149 44.8003345643334 43.6662436706167 45.4538655633538  
44.7941491078266  
CYP51A1 53.6741873729867 50.8114699212931 48.1331309338997  
50.2163892855092 51.940083408061 53.2046867327331 59.5205055437765  
73.362936710475 99.6340486428397 55.0016608333828 55.2374601141719  
68.8529879402902  
CYP7A1 40.4639532172338 41.2598458726002 40.4882741869718  
38.5252456306656 40.5710637884029 38.3418933808844 38.4005795891396  
40.1474543172332 42.0621425894624 42.5664883002833 45.2265319826548  
38.5279745308203  
CYP7B1 34.2180669723984 43.1805016690297 37.5597671487621  
40.7481155008596 41.7929491793697 45.4882438975269 37.2892641289258  
39.853866204927 40.7847110517594 45.0155543555707 42.5426057453993  
41.0657892043496  
CYP8B1 38.6454098044474 40.7952353240579 41.1367478979484  
39.3750969348308 40.2449343247539 37.1317006162938 40.5585676679482  
46.5717043290731 42.5406888281114 38.3092241935352 43.4709415392696  
45.4799270968969  
CYR61 2611.32405374107 1506.33570635551 616.265771322835 1076.05074395483  
333.421080658854 1917.90025587049 162.735117558467 580.444451816014  
103.349712762251 256.941243394182 1638.16317738035 532.043503787542  
CYS1 43.2724556187214 40.931294690669 38.195965820384 42.0621425894624  
39.2968590261598 37.9430145836712 43.1602899171656 41.2098211956301  
39.2497056720346 39.7411455670172 38.0365987358005 42.4607795638552  
CYSLTR1 47.5647821785529 65.5367689605146 57.7415362494584  
158.478919789334 47.0954207417646 62.9688525319822 49.3854238365325  
51.8347877274018 46.1101825640108 46.441301934328 47.3791873993182  
48.3648494350286  
CYSLTR2 33.4240466670776 43.9421822132391 36.6522278218553  
40.3180310664156 42.269054475455 40.9506062495231 35.3362091871364  
34.8949555140527 38.2215591930186 32.7876527533679 38.3684202018524  
38.6454098044474  
CYTH1 71.2963721541702 68.6074516459969 67.0421310720934 140.175068871414  
55.6991707857987 73.0247140074919 54.0170817319522 59.0262390168156  
60.5608545741456 57.4665857273093 66.3481553496766 56.1875519519366  
CYTH3 75.0237373605584 54.3554233228353 58.2986825661503 47.1332119496722  
63.104563489528 72.2544131004774 49.540449125788 48.1591264215184  
56.7991853808475 56.057906531592 57.2008272301399 53.1182952086284  
CYTL1 44.1294459089314 64.7650773032999 40.7620472083159 90.2790229242453  
52.8190882379316 68.4323624797175 38.1793598983615 42.7431359850339  
40.137818555383 58.6439719071099 65.4493288628375 51.5741598315033  
CYYR1 79.6581393791238 78.6705291023488 135.782043043499 123.281175151414  
64.193536444915 132.364260893831 44.2166118829877 85.7732262204681  
41.7627910693483 104.672760332135 152.456314990408 110.731862140996  
D21S2056E 30.9241129241985 37.5469247328848 32.2796484885898  
36.7892997857376 37.8679241954337 35.2067831864574 33.9750800030909  
34.3865306339645 34.6720534245631 38.4187686307607 38.956280281655  
33.6902293666089

|         |                  |                  |                  |                  |
|---------|------------------|------------------|------------------|------------------|
| D2HGDH  | 469.14509810985  | 382.050584680669 | 865.63777294494  |                  |
|         | 252.583117397109 | 250.799060762208 | 193.981651711507 | 228.439524702578 |
|         | 137.218635091665 | 416.40156274382  | 864.302844775203 | 886.397061577531 |
|         | 716.754656773542 |                  |                  |                  |
| D4S234E | 40.5654775358427 | 693.056793637199 | 1533.38581753491 |                  |
|         | 69.3525901554637 | 206.08791147394  | 62.9688525319822 | 78.0020909283414 |
|         | 93.7090094630558 | 352.768184657577 | 504.676944739425 | 524.711981433682 |
|         | 343.94159167652  |                  |                  |                  |
| DAAM1   | 101.383978726419 | 142.863673914134 | 132.52749757795  | 105.125095381533 |
|         | 69.9021277921574 | 149.295715963625 | 84.5055910320032 | 207.957319374194 |
|         | 151.912182086236 | 133.549684980003 | 160.303575545559 | 184.750252804038 |
| DAAM2   | 64.1882546112044 | 47.9665737016961 | 46.2625470410195 | 56.9299697426319 |
|         | 50.3713170502557 | 68.839885767937  | 64.8367546135053 | 78.8250642061439 |
|         | 38.3418933808844 | 79.262977183608  | 70.0402992940342 | 75.9136854087044 |
| DAB1    | 42.7150227340364 | 38.8336427948187 | 37.0642268327439 | 41.6564075217517 |
|         | 37.4470183315826 | 34.9849896310235 | 37.7136011474903 | 40.1474543172332 |
|         | 35.9645119596869 | 39.8873706855774 | 44.3763859390287 | 35.3525469364579 |
| DAB2    | 290.087040648659 | 235.682605856428 | 164.735191308776 | 521.874349042344 |
|         | 117.76002524375  | 468.573956652904 | 147.321968565095 | 1366.59129560817 |
|         | 57.404059248727  | 129.613152757362 | 203.870471031175 | 174.559216176175 |
| DAB2IP  | 42.442231667357  | 46.8236022402545 | 38.8403878304539 |                  |
|         | 43.6275678329783 | 46.6972735797732 | 44.4619248757502 | 46.7100796279384 |
|         | 44.4489662507893 | 44.2836121830547 | 45.9573418095075 | 42.9699559565161 |
|         | 42.8864415494484 |                  |                  |                  |
| DACH1   | 41.2836317141451 | 43.1560065801875 | 40.641503836284  | 54.2059913044076 |
|         | 43.0860383229288 | 45.3882138838137 | 40.8600431177315 | 56.6910078150745 |
|         | 41.0522938990031 | 61.6084234634424 | 67.2575005672188 | 48.5123041297835 |
| DACH2   | 45.3872406432794 | 57.7757446006652 | 71.1521292570086 | 44.1483976313959 |
|         | 53.6907197364586 | 45.9266745571724 | 41.5817737564592 | 44.4031868028216 |
|         | 47.6195009345747 | 60.0372015630618 | 54.2999306485758 | 56.9379721393904 |
| DACT1   | 107.836867810972 | 51.6060290544385 | 42.3536549114165 | 46.7577982595088 |
|         | 44.2607789091176 | 75.0801071257739 | 41.6520912742594 | 74.4696354388511 |
|         | 42.1594905198929 | 54.302003946825  | 51.5822637582617 | 55.4071190623241 |
| DACT2   | 46.5549623118323 | 46.5650556481721 | 34.4716904283753 | 44.6905691366696 |
|         | 42.6022652963326 | 66.6320017520888 | 56.9320717885002 | 43.1567024035183 |
|         | 38.9834959368496 | 105.212030988223 | 59.2643906275025 | 62.3997407955361 |
| DACT3   | 126.10194284238  | 80.0502531022254 | 78.080034922779  | 100.001150612051 |
|         | 76.6914642534934 | 529.025813945023 | 63.0119737420787 | 72.692416146584  |
|         | 55.8510296341925 | 390.740971459177 | 290.087040648659 | 228.703786640132 |
| DAD1    | 2108.03351084959 | 1029.12917222294 | 1234.59589464045 | 1607.73526966988 |
|         | 959.549658414082 | 1147.19483787501 | 793.570993808328 | 805.590413262364 |
|         | 1221.31634960736 | 733.358170858378 | 1057.44729389649 | 1670.01014610464 |
| DAG1    | 151.175959542368 | 171.705718494906 | 160.853643241489 | 78.0020909283414 |
|         | 230.344359535334 | 123.855293655347 | 215.109108265052 | 140.199798713912 |
|         | 243.15571937138  | 198.652987129375 | 190.921576470336 | 150.562062400737 |
| DAGLA   | 52.9240098541574 | 46.2286164776607 | 39.0775870687758 | 54.4586176399381 |
|         | 65.3933030211114 | 48.5835484742456 | 44.7255207589606 | 43.844855336215  |
|         | 57.5883027758003 | 38.2069499294002 | 42.0750889188255 | 36.064718696392  |
| DAGLB   | 166.644251737703 | 137.302487233881 | 181.2179249806   | 187.802182308625 |
|         | 196.561401686392 | 104.80882886573  | 192.171116215791 | 186.161177110898 |
|         | 179.322661675979 | 173.150885069619 | 152.132756414024 | 141.784776736918 |
| DAK     | 58.5759178381027 | 99.2824152850072 | 113.539485042978 | 56.2508140932179 |
|         | 110.599131324937 | 58.0910843932181 | 117.811967515956 | 118.075168790221 |
|         | 98.2512963929558 | 94.233414682323  | 95.5325488969517 | 75.7140064167134 |

|        |                  |                  |                  |                  |
|--------|------------------|------------------|------------------|------------------|
| DALRD3 | 46.441301934328  | 52.8455400026194 | 49.2595762436995 |                  |
|        | 47.5733603903505 | 50.7116312517035 | 46.1974343793412 | 43.1602899171656 |
|        | 41.2551966132486 | 51.7289068180135 | 46.0713306971594 | 46.0513515682555 |
|        | 49.0655215909632 |                  |                  |                  |
| DAND5  | 41.5421429082231 | 45.5842286511645 | 45.989212296035  | 40.3180310664156 |
|        | 40.5710637884029 | 47.7556758818053 | 41.8315602975157 | 42.8482181313226 |
|        | 40.7847110517594 | 42.2614524730856 | 41.8168470823451 | 37.6557714476853 |
| DAO    | 43.4626049853157 | 40.7952353240579 | 38.9790184198145 | 41.5464765641928 |
|        | 36.5393857306744 | 42.5660695551615 | 46.1634822993009 | 34.9580369221164 |
|        | 48.4869909888679 | 45.0155543555707 | 46.972521499515  | 44.3521099857368 |
| DAOA   | 38.5007204246293 | 43.0227387991135 | 40.301483914446  | 40.7481155008596 |
|        | 39.1650142708257 | 38.2293008890613 | 43.9450023643394 | 37.2237132058632 |
|        | 43.2761454096265 | 37.3179578037963 | 38.8507804383261 | 39.7411455670172 |
| DAP    | 245.811158468638 | 346.844545554188 | 293.883582116334 | 210.255784687052 |
|        | 170.450752247109 | 199.294913752704 | 645.702744916884 | 264.659866487253 |
|        | 284.351747562807 | 297.701126167694 | 338.72596574658  | 347.247950836937 |
| DAP3   | 542.684866424241 | 544.355979695242 | 740.423874031773 | 374.026381773215 |
|        | 780.966123176259 | 557.717744882602 | 451.364230598722 | 386.98657211459  |
|        | 471.297503316471 | 353.868749867979 | 467.351570171652 | 566.548446430954 |
| DAPK1  | 158.042994416158 | 311.985010273921 | 95.5022104475922 | 131.141908315555 |
|        | 117.893268074013 | 103.856444152519 | 146.117756310709 | 212.813224717262 |
|        | 121.142787642824 | 131.779333469955 | 125.383837024985 | 92.084526929319  |
| DAPK2  | 46.0023068797812 | 46.0713306971594 | 48.6037684272115 | 48.4916117779992 |
|        | 46.0977687311222 | 44.2607789091176 | 43.9450023643394 | 53.4109882045447 |
|        | 63.1944558106132 | 90.6805895192707 | 62.9336909080086 | 52.1186591838715 |
| DAPK3  | 133.742988105942 | 86.6854406823303 | 83.5149142053137 | 77.6574950328663 |
|        | 99.1438953564062 | 130.506891299903 | 106.317388820963 | 123.800965644574 |
|        | 104.288073521816 | 101.138003125297 | 119.956819012894 | 73.7335870746827 |
| DAPL1  | 35.2267149016596 | 40.148780650831  | 195.430996540859 | 35.49696651597   |
|        | 37.2567512265363 | 40.5281496800812 | 42.2577689927563 | 40.047314525032  |
|        | 79.1576305054224 | 139.814194128548 | 76.8713035584472 | 202.081933301612 |
| DAPP1  | 911.661341702443 | 508.688028777582 | 632.019639546131 | 874.419252731128 |
|        | 382.872356030213 | 337.363827785838 | 781.923984640049 | 1423.29307392266 |
|        | 456.023620287811 | 1217.21440297138 | 1327.93833415582 | 1009.47177197543 |
| DARC   | 39.5676051939342 | 139.554519110944 | 141.293219914385 | 429.329962597147 |
|        | 51.2525124735102 | 939.453799186397 | 66.4258159334241 | 139.925369282704 |
|        | 33.802253812079  | 122.824055084598 | 175.84382217093  | 447.953017125817 |
| DARS   | 1921.48678333837 | 1704.0522304387  | 2045.24530722676 | 1490.1549980903  |
|        | 1835.21901524331 | 1886.05449875658 | 1333.01876209753 | 1561.83892117664 |
|        | 1985.3999418878  | 2771.14077845128 | 2300.20602168385 | 1848.50311456636 |
| DARS2  | 112.351686948586 | 68.9833517108866 | 115.256208610595 | 60.9379216295576 |
|        | 138.50445813694  | 48.7781962164988 | 97.4515987591398 | 72.5835488194631 |
|        | 101.81885073944  | 75.0665411373616 | 69.9652162720742 | 73.3321469094819 |
| DAXX   | 163.43197105141  | 112.944044862693 | 102.500172212095 | 89.1290937615998 |
|        | 118.376686726902 | 72.8472187581193 | 131.645714321903 | 88.0827215704624 |
|        | 97.0348634204639 | 127.265200736376 | 102.304422999511 | 94.3953345963359 |
| DAZ1   | 43.5710871617107 | 33.8237407699472 | 39.4710743516517 | 40.1804147506786 |
|        | 40.3452320167286 | 39.2985791324641 | 40.7910160811527 | 40.7311497914871 |
|        | 39.853866204927  | 42.4594149893798 | 40.0766543123257 | 45.3763275588341 |
| DAZ2   | 43.2724556187214 | 41.0226232127351 | 42.7303139017786 | 43.1275490164761 |
|        | 40.4321207743917 | 45.3233134695905 | 39.700936357233  | 43.0930293831497 |
|        | 40.3316153483289 | 48.7414853386615 | 44.9713479185144 | 39.8873706855774 |

|        |                  |                  |                  |                  |
|--------|------------------|------------------|------------------|------------------|
| DAZ4   | 43.2028319630577 | 40.6380495994768 | 42.4580504587581 | 43.26160898693   |
|        | 42.7107928951766 | 39.0266821712099 | 43.1931731665131 | 43.0895173605825 |
|        | 44.7804080899431 | 38.8507804383261 | 41.7272875295469 | 42.4162492820012 |
| DAZAP1 | 82.9875926750034 | 132.400225103653 | 100.567309348016 |                  |
|        | 68.3157692917711 | 185.378190201718 | 89.1290937615998 | 119.747995520476 |
|        | 91.0354017559834 | 135.800775637089 | 77.1767494799711 | 105.814959179397 |
|        | 89.847560289665  |                  |                  |                  |
| DAZAP2 | 1297.78424326775 | 2978.46032143413 | 2348.48320928245 |                  |
|        | 3854.42494497831 | 1046.42391243532 | 1835.21901524331 | 2101.59244895554 |
|        | 2013.08489754172 | 2966.53151444114 | 1855.0119962662  | 2266.34088015654 |
|        | 2705.15813218168 |                  |                  |                  |
| DAZL   | 40.308802735799  | 37.4772922422734 | 34.6346303305453 | 39.1335009052403 |
|        | 39.3999056968598 | 36.9625898230551 | 41.5817737564592 | 36.489383074099  |
|        | 38.9496515344837 | 42.0621425894624 | 35.1102845029216 | 41.2437378488025 |
| DBC1   | 39.1590964332473 | 40.716553247236  | 43.0971787292711 | 47.2009420656854 |
|        | 37.2567512265363 | 40.040778349137  | 38.7337086062875 | 38.6454098044474 |
|        | 37.9273653326866 | 46.7646877499666 | 50.2203578628217 | 36.449101775775  |
| DBF4   | 51.8781065691038 | 45.1694246393676 | 45.5883690965192 | 44.6905691366696 |
|        | 41.6806984441849 | 43.6670755115848 | 41.5817737564592 | 38.4540849632254 |
|        | 43.5669306063196 | 45.1569741609597 | 44.7926323492519 | 40.0557788909923 |
| DBF4B  | 38.2496050953547 | 40.7952353240579 | 39.6833800000587 | 42.7489468897708 |
|        | 43.0723817756832 | 39.8785903668981 | 40.5585676679482 | 43.7396619462033 |
|        | 44.2607789091176 | 42.5193208629123 | 40.6723334103791 | 44.8372404608604 |
| DBH    | 44.0328992213727 | 35.8227939208521 | 38.0452862258803 | 33.3231576795423 |
|        | 41.5668884168669 | 42.8598805316863 | 39.5496902678788 | 37.2237132058632 |
|        | 33.4698406117406 | 39.2623423164488 | 41.0050831223107 | 39.9519547348106 |
| DBI    | 628.84789420227  | 798.033975337132 | 786.57695312967  | 1149.02954135912 |
|        | 1045.20336057833 | 497.290172759099 | 841.850722284484 | 2045.24530722676 |
|        | 1642.75555340648 | 422.237766234202 | 537.841677481011 | 760.745188431719 |
| DBN1   | 257.993462737264 | 85.0017995689256 | 79.3066495980045 | 110.202401893789 |
|        | 106.8866235778   | 247.416016413788 | 158.408644964483 | 238.025903833797 |
|        | 73.3506594385504 | 188.432979046693 | 158.449570606242 | 171.485221601137 |
| DBNDD1 | 119.795228959021 | 92.2095095678497 | 76.6346767983285 |                  |
|        | 35.7674462337723 | 116.817127851913 | 59.2643906275025 | 204.944787289897 |
|        | 113.767996184128 | 117.072965367702 | 57.8585041080995 | 58.133863696399  |
|        | 52.0863423572635 |                  |                  |                  |
| DBNDD2 | 286.927016665685 | 731.071171171638 | 306.487935692954 |                  |
|        | 615.442484911026 | 237.632703283663 | 1137.99307039386 | 756.801598119483 |
|        | 245.853111206859 | 100.344513700137 | 806.34906276292  | 557.275332269647 |
|        | 715.662312404643 |                  |                  |                  |
| DBNL   | 416.052744271365 | 373.46798029115  | 442.711822532078 | 506.75912743556  |
|        | 347.750020791938 | 383.578947165143 | 324.126628444078 | 460.602626145229 |
|        | 396.167219131922 | 460.865101118125 | 440.728435508514 | 288.687391623935 |
| DBP    | 48.0201377454632 | 50.7487159427973 | 51.223859150798  | 56.7927450229377 |
|        | 60.7495043977707 | 62.2818512646893 | 59.3549213146532 | 46.9986083378817 |
|        | 116.949813289388 | 78.0658258913875 | 64.3032703931013 | 40.5703581862752 |
| DBR1   | 53.8856501960117 | 56.939860285007  | 51.4308501933893 | 45.4882438975269 |
|        | 51.4092491522288 | 46.3203995372658 | 47.5130990528612 | 47.6952179922944 |
|        | 55.0748878261048 | 42.5193208629123 | 52.6547683625018 | 45.9104478407175 |
| DBT    | 124.599352191013 | 168.897476166126 | 148.3842032507   | 97.2865629929716 |
|        | 148.582198572949 | 133.877825732645 | 149.231260844854 | 112.428734515811 |
|        | 144.300051706447 | 161.7095047889   | 179.897685693038 | 178.592741163095 |

|         |                  |                  |                  |                  |
|---------|------------------|------------------|------------------|------------------|
| DBX1    | 40.6559419616644 | 37.1685072112618 | 34.6977013306396 | 40.0698728584484 |
|         | 36.2048942610546 | 38.2293008890613 | 35.9894133432376 | 37.33030683349   |
|         | 41.1742244762318 | 38.8507804383261 | 38.3684202018524 | 30.5239050647746 |
| DBX2    | 39.512606833112  | 40.6380495994768 | 46.4569566520107 | 38.1421709520616 |
|         | 42.4493032770053 | 42.4155142987678 | 40.3302268293707 | 40.8833572570383 |
|         | 41.0476065156912 | 42.2614524730856 | 41.134180463103  | 40.8098117292322 |
| DC2     | 406.964801954621 | 452.797096652556 | 325.275883498219 | 446.613670519745 |
|         | 538.427311162325 | 298.031228833741 | 292.47671022688  | 179.322661675979 |
|         | 481.145001682177 | 129.161393794351 | 137.360931076154 | 361.158558609751 |
| DC36    | 46.9939712192224 | 49.1283590719461 | 62.1893884200745 | 43.8002456102021 |
|         | 48.5000946421718 | 45.2852528185486 | 45.8980298854198 | 49.5185112777773 |
|         | 56.702421372165  | 46.1390887492649 | 47.9942520395434 | 50.8442982601142 |
| DCAKD   | 407.336051853854 | 284.437758089699 | 196.465477936749 | 214.073500272341 |
|         | 284.795064481553 | 297.023913988137 | 491.8684831079   | 578.456468865003 |
|         | 353.810269076023 | 979.468753716758 | 659.666977039793 | 683.75696650704  |
| DCAMKL3 | 47.9175508887533 | 46.4385386401326 | 42.7303139017786 |                  |
|         | 49.5424425850549 | 39.9697332660833 | 42.157627240486  | 43.4544762830742 |
|         | 46.0633179231318 | 42.4540072551568 | 43.7303813515864 | 39.153226699662  |
|         | 41.1554481567603 |                  |                  |                  |
| DCBLD1  | 60.8357760968871 | 80.4822328865    | 63.7744603935682 |                  |
|         | 71.2572485987604 | 61.3077641493507 | 51.8103411703261 | 56.3376046940285 |
|         | 57.9713749600418 | 61.6839343510302 | 62.3233491851723 | 53.0798381965427 |
|         | 65.524821699432  |                  |                  |                  |
| DCBLD2  | 220.682149473323 | 65.1291617069903 | 75.2237417063897 |                  |
|         | 136.891616331257 | 86.4195039096886 | 189.111092737256 | 176.520449609867 |
|         | 144.813029178278 | 118.816772641597 | 199.858233616116 | 134.697808298417 |
|         | 136.947616119439 |                  |                  |                  |
| DCC     | 42.1537476443423 | 42.4493032770053 | 41.437237454134  | 45.7397504535169 |
|         | 38.6454098044474 | 38.5252456306656 | 40.4359177791566 | 39.1652965788406 |
|         | 39.1790517315259 | 43.9450023643394 | 47.6884372645373 | 45.3763275588341 |
| DCD     | 41.9407041937973 | 45.5842286511645 | 41.3366779545815 | 39.853175885492  |
|         | 41.9842695818285 | 38.8336427948187 | 45.223075311113  | 44.7044140979108 |
|         | 37.5469247328848 | 43.2988017098387 | 41.9083581529276 | 44.5432192783161 |
| DCDC1   | 36.0144420013819 | 36.9994058279362 | 40.0998167098057 | 41.0726336841311 |
|         | 41.2740822675592 | 38.7340969861754 | 42.1607322031054 | 40.5158867964016 |
|         | 41.5635499110307 | 42.6793753550854 | 41.2598458726002 | 39.5418280570561 |
| DCDC2   | 41.0608773166058 | 44.2630383225933 | 38.5045333213784 | 38.745552403895  |
|         | 41.467005949568  | 41.3553369544097 | 85.5027511448958 | 78.253478446856  |
|         | 42.9020321355927 | 46.441301934328  | 40.4504608195666 | 47.6938628797168 |
| DCDC2B  | 46.5549623118323 | 38.0226905622357 | 41.2365089689635 |                  |
|         | 40.0698728584484 | 37.4470183315826 | 39.0266821712099 | 42.8684958525042 |
|         | 42.4580504587581 | 35.6139301508335 | 40.8970401536578 | 46.1673159982664 |
|         | 44.6484005362281 |                  |                  |                  |
| DCDC5   | 59.4448586839717 | 61.5144360539876 | 71.2681122787939 | 82.0292880742189 |
|         | 86.033725825968  | 72.0073363366137 | 83.5149142053137 | 67.3976855661302 |
|         | 67.3230935444252 | 65.9189023794337 | 67.6699686085575 | 79.2525964926483 |
| DCHS1   | 54.5358897781765 | 51.6060290544385 | 54.5191471810265 | 57.2856683017619 |
|         | 57.1935729219207 | 60.7488007939604 | 53.0277416531043 | 47.9942520395434 |
|         | 56.1733549054832 | 63.6197695952215 | 60.1466326805616 | 47.3992733452821 |
| DCHS2   | 40.4179476219497 | 40.2493681589104 | 41.2365089689635 | 40.1804147506786 |
|         | 40.0145811166794 | 41.9069736908705 | 39.700936357233  | 38.5457716679071 |
|         | 38.0702079388879 | 39.3113207075992 | 44.3763859390287 | 37.3600014814388 |

|         |                  |                  |                  |                  |
|---------|------------------|------------------|------------------|------------------|
| DCI     | 83.1614238528477 | 114.41703170676  | 114.734157967466 | 80.0042268333735 |
|         | 105.589475270494 | 125.934747056908 | 135.737771384104 | 103.199200862158 |
|         | 179.886168478179 | 116.099186392258 | 139.071851755156 | 113.624887028422 |
| DCK     | 77.0301627655229 | 101.699631771662 | 80.3060865378414 | 111.071209057746 |
|         | 75.7947206223934 | 86.3185927557402 | 86.4114854104675 | 70.4262478188233 |
|         | 86.6910280940418 | 60.7495043977707 | 61.0979269700412 | 72.9580216367379 |
| DCLK1   | 71.0733129130898 | 56.3263223563484 | 53.4088637045445 | 56.2508140932179 |
|         | 53.8260140375214 | 142.03031230486  | 64.3669451425581 | 71.0197205018137 |
|         | 58.7382738968248 | 65.429256309049  | 67.6699686085575 | 69.9767092409915 |
| DCLK2   | 63.6287257620165 | 45.7979032939211 | 48.8623729374733 | 48.7646976789783 |
|         | 47.0954207417646 | 58.9056300364078 | 40.8681871019812 | 69.9144520559912 |
|         | 36.5474283500601 | 55.3477556906605 | 54.6738135880328 | 55.7802841481067 |
| DCLRE1A | 56.921728372453  | 76.1682394916873 | 85.5839487225537 |                  |
|         | 56.6458456890715 | 86.5513342734384 | 58.1798515131249 | 87.7107079534841 |
|         | 74.9541456286637 | 86.6516906104905 | 84.5055910320032 | 76.7063975550116 |
|         | 78.0586153423713 |                  |                  |                  |
| DCLRE1B | 44.1294459089314 | 47.087835967892  | 44.6032218589199 |                  |
|         | 41.6564075217517 | 43.3332476888305 | 39.9397419279057 | 47.1345949868029 |
|         | 46.9986083378817 | 49.3780606970538 | 37.4302011516587 | 42.0750889188255 |
|         | 43.4709415392696 |                  |                  |                  |
| DCLRE1C | 118.923419920947 | 83.8658743784404 | 91.1363393944977 |                  |
|         | 158.769954040462 | 83.6438735616921 | 93.3718038663074 | 137.658868649032 |
|         | 180.844663304872 | 95.1037791424727 | 156.197625493702 | 160.605530211736 |
|         | 125.197314240529 |                  |                  |                  |
| DCN     | 3421.24021192326 | 595.790464730847 | 268.144525192544 | 2009.75680599899 |
|         | 923.470702344816 | 7785.77078492993 | 104.480361196422 | 681.474524031866 |
|         | 95.0350792557735 | 3905.8371644287  | 2650.09507972593 | 2978.46032143413 |
| DCP1A   | 92.084526929319  | 96.6963826355216 | 93.310557793228  | 132.52749757795  |
|         | 93.5717680539357 | 125.81889994067  | 122.514153407264 | 77.523734787944  |
|         | 101.46584765758  | 164.176142753482 | 134.994839576312 | 143.278668481091 |
| DCP1B   | 44.6231541342    | 51.7983110178095 | 51.6159542017038 | 60.1837189855762 |
|         | 53.4109882045447 | 71.7021670182761 | 60.7992483126292 | 57.037639245179  |
|         | 50.6750785584772 | 71.2409890549638 | 64.3824529624475 | 55.5712957590038 |
| DCP2    | 226.970981973829 | 206.931452638325 | 177.65469867262  | 246.274692971423 |
|         | 156.174166381986 | 143.932614622477 | 185.165420581989 | 234.495626550751 |
|         | 212.187855950414 | 280.075938355178 | 247.04098109003  | 242.792365320043 |
| DCPS    | 92.3659612653822 | 127.701556328274 | 150.545989010484 | 102.605473054584 |
|         | 175.362103430164 | 104.059057437473 | 160.605530211736 | 140.698550434486 |
|         | 160.755701876741 | 160.056757080676 | 155.225701588645 | 167.639975497722 |
| DCST1   | 45.6517320730042 | 40.6380495994768 | 41.8751578329365 | 41.0726336841311 |
|         | 39.859345745831  | 39.8455060654531 | 42.4939802311136 | 46.3685439301234 |
|         | 41.074824727477  | 38.1042454705119 | 40.0766543123257 | 40.7704587752083 |
| DCST2   | 43.0001432913058 | 38.7344853699576 | 39.3709357615493 | 36.264823544143  |
|         | 41.6806984441849 | 42.0574848021044 | 42.2577689927563 | 44.7044140979108 |
|         | 45.0017158586743 | 43.4885245598939 | 37.2018803984555 | 40.8681871019812 |
| DCT     | 40.2543341073001 | 44.5152708955623 | 42.9104454767916 | 41.3027031037343 |
|         | 37.956732373465  | 41.159706131351  | 49.1067959632109 | 40.931294690669  |
|         | 44.8997235283254 | 40.4136535208406 | 40.9157352260901 | 42.6758568421347 |
| DCTD    | 303.744307989358 | 545.827286197333 | 318.069132873489 | 257.506228440451 |
|         | 504.281506941044 | 307.754078087321 | 415.05124917015  | 228.08291792003  |
|         | 310.900527198512 | 352.246108891022 | 426.622204035624 | 342.146013966482 |
| DCTN1   | 159.248015095017 | 123.720102870283 | 151.795609904857 | 138.486962379511 |
|         | 132.81898450496  | 197.103673938152 | 122.642481894309 | 219.238235572894 |
|         | 134.968128884298 | 211.897320355251 | 221.083802855232 | 173.288267403695 |

|         |                   |                  |                  |                  |
|---------|-------------------|------------------|------------------|------------------|
| DCTN2   | 991.630429625437  | 808.857027942253 | 1087.75682788799 | 851.108027634251 |
|         | 682.35345164708   | 1260.45604038487 | 1196.18785007729 | 1591.51486001004 |
|         | 1228.1735887278   | 1061.61186520958 | 1174.92419086759 | 1103.90449800536 |
| DCTN3   | 342.300139006451  | 344.133384411423 | 265.790391813663 | 314.782545392841 |
|         | 271.50380898418   | 406.104588997462 | 387.631477822638 | 258.726193861248 |
|         | 200.986069552443  | 279.782392390288 | 266.581466060604 | 258.375785708747 |
| DCTN4   | 100.057155418659  | 71.4197504261453 | 78.5325880060762 | 102.971363152434 |
|         | 74.0735632658567  | 94.7008981904016 | 68.4380822448123 | 109.326279686847 |
|         | 105.549249728506  | 151.451107406752 | 127.708268637068 | 123.978615472736 |
| DCTN5   | 213.140641182603  | 212.945601743319 | 308.931677425404 | 223.316311787046 |
|         | 229.697141930047  | 231.893992191022 | 181.064239330482 | 270.947794977829 |
|         | 251.184621899165  | 247.547769833089 | 308.931677425404 | 354.38923772101  |
| DCTN6   | 127.50316411791   | 126.775432305478 | 197.813848976726 | 168.561260174501 |
|         | 82.5170409503063  | 211.596652798395 | 141.69593269802  | 80.191847692094  |
|         | 114.5696064637    | 110.164155258574 | 127.78061946174  | 192.003788858976 |
| DCUN1D1 | 59.7961440557352  | 58.4134572546373 | 64.3655212368264 |                  |
|         | 69.5544840164738  | 81.6949047529395 | 79.4916415027015 | 60.726977722583  |
|         | 57.3286965007828  | 64.0903425729408 | 42.8936990772838 | 50.0303076717704 |
|         | 59.3082373468217  |                  |                  |                  |
| DCUN1D2 | 44.7044140979108  | 47.7962548556026 | 53.1144624658538 |                  |
|         | 47.0874209746031  | 46.3607182640185 | 43.4263583096036 | 53.1884505015411 |
|         | 45.9604707098953  | 46.6944238390932 | 47.0055981216687 | 48.2910530887214 |
|         | 46.0633179231318  |                  |                  |                  |
| DCUN1D3 | 143.761359357965  | 110.666686474986 | 139.693327116993 |                  |
|         | 573.832332097619  | 115.229070906222 | 215.955919625615 | 137.547711779867 |
|         | 206.072527867605  | 112.414189401193 | 155.519517541864 | 182.188883821722 |
|         | 187.462631817772  |                  |                  |                  |
| DCUN1D4 | 125.402628368587  | 97.2803806915572 | 138.036631806718 |                  |
|         | 114.979124960177  | 141.180682718758 | 257.194689822426 | 135.012695962236 |
|         | 126.930102684077  | 140.78326016606  | 311.361885152025 | 235.682605856428 |
|         | 217.6996233059    |                  |                  |                  |
| DCUN1D5 | 205.898127436939  | 252.775631043952 | 246.274692971423 |                  |
|         | 184.50283792606   | 452.969595001684 | 246.151211515664 | 311.668075784386 |
|         | 189.950108471943  | 351.439404852971 | 113.82565808481  | 106.443777149496 |
|         | 182.551901102169  |                  |                  |                  |
| DCX     | 43.9309845324767  | 45.5587966941116 | 40.9818899755491 | 41.6045220683604 |
|         | 45.6895223823001  | 50.0404995046748 | 44.6809101024392 | 41.6916508480321 |
|         | 45.0997987980157  | 41.8613406887824 | 42.6366765186182 | 42.0709558258414 |
| DCXR    | 239.466489599238  | 284.620447030305 | 250.866560791828 | 182.37433006793  |
|         | 443.863346367342  | 187.238252376588 | 489.622327794168 | 343.262403838579 |
|         | 474.267141780289  | 331.935072199058 | 359.83890067786  | 230.520772006119 |
| DDA1    | 406.104588997462  | 593.345148568451 | 509.004054793277 | 391.187784616808 |
|         | 995.397944432196  | 392.51606894011  | 585.771656887036 | 501.148339791372 |
|         | 398.139730642919  | 321.818380385895 | 388.580556899321 | 302.422475486532 |
| DDAH1   | 107.466490458133  | 86.8262463672891 | 61.1076362129586 | 55.6481366056639 |
|         | 72.2665537421443  | 112.23915619297  | 195.262845535544 | 226.168990555083 |
|         | 65.0810479794187  | 223.501516374076 | 168.326515533208 | 233.263058459431 |
| DDAH2   | 59.220967994972   | 41.9894412416874 | 41.9666541498638 | 39.3750969348308 |
|         | 39.3667161654772  | 120.231435193839 | 75.164719839017  | 67.8061298261394 |
|         | 46.6944238390932  | 59.3618843678775 | 70.4204944097269 | 53.4735821194294 |
| DDB1    | 452.139416552986  | 474.155196153863 | 544.355979695242 | 426.622204035624 |
|         | 928.2304192226078 | 454.02808608679  | 797.019657306322 | 883.06773454117  |
|         | 606.481020597082  | 782.639346040155 | 697.57030127315  | 506.585006700107 |



|        |                  |                  |                  |                  |
|--------|------------------|------------------|------------------|------------------|
| DDB2   | 39.1590964332473 | 50.3586212130973 | 50.5089777244781 | 43.3078542962968 |
|        | 43.6587492470348 | 44.9896851005259 | 45.7452456977857 | 36.0306975524309 |
|        | 46.4861258030402 | 47.1001757441025 | 46.8954576545929 | 47.2131144508464 |
| DDC    | 41.2424637338424 | 45.4143854024453 | 46.9040704638073 | 41.4273122914951 |
|        | 46.3150221024046 | 45.6129956328415 | 47.1345949868029 | 44.797320243931  |
|        | 43.8482802038826 | 43.6033221838149 | 43.401782064778  | 44.9070250604284 |
| DDEF1  | 332.137622104526 | 241.706783147271 | 172.381808887528 | 585.771656887036 |
|        | 202.459251553516 | 219.702703529829 | 214.369365247268 | 311.301613620475 |
|        | 162.735117558467 | 187.331614826395 | 181.381479219186 | 207.245428311682 |
| DDEF2  | 132.838429478396 | 105.34055372228  | 56.6888826857797 | 83.1614238528477 |
|        | 72.828269171954  | 89.4747568145717 | 162.486448421519 | 342.73665541549  |
|        | 91.2488561751625 | 101.351907645804 | 80.6032289311256 | 113.491158368594 |
| DDHD1  | 36.5393857306744 | 36.4564050256915 | 41.1367478979484 | 39.2336402665402 |
|        | 39.3999056968598 | 39.9777866059804 | 40.0052661202207 | 37.7612949798895 |
|        | 39.0458123429605 | 38.8173773425835 | 39.9586075662602 | 36.8209886489281 |
| DDHD2  | 92.6545309624315 | 95.0738959950301 | 89.8354888041611 | 130.775349446374 |
|        | 143.084029849218 | 131.727983826985 | 141.784776736918 | 115.132600341395 |
|        | 75.4572860692649 | 106.049736669661 | 97.7415824971555 | 101.832945816193 |
| DDI1   | 36.0144420013819 | 43.9421822132391 | 41.0356368374708 | 41.1886975241176 |
|        | 46.6397391251762 | 29.0303154053123 | 38.4005795891396 | 39.6474008369935 |
|        | 37.0126425326534 | 42.0621425894624 | 39.6403089864678 | 37.8490162439785 |
| DDI2   | 39.0237504776589 | 44.9863726205428 | 39.5954353681031 | 41.7614975630362 |
|        | 42.3536549114165 | 43.1180113655693 | 40.968974769473  | 39.7509165247419 |
|        | 43.9204029310411 | 41.0057887014368 | 38.7337086062875 | 40.2237056928605 |
| DDIT3  | 141.471672990444 | 78.258486366912  | 80.4060693489113 | 334.527003257901 |
|        | 58.5450868286167 | 183.243195292141 | 100.499763255098 | 125.484233748017 |
|        | 215.955919625615 | 214.281036491237 | 214.281036491237 | 151.641746442323 |
| DDIT4  | 2323.81110653289 | 315.960715273629 | 4597.60989502097 | 2036.72286752819 |
|        | 1896.06380611235 | 719.815240381415 | 1423.29307392266 | 663.372296297652 |
|        | 13656.2581082905 | 1801.44003951248 | 3143.97163345458 | 4277.93019582362 |
| DDIT4L | 104.986694941968 | 51.524711857679  | 49.9256753636167 |                  |
|        | 45.334106390212  | 62.8270556619309 | 104.059057437473 | 52.4111687156893 |
|        | 43.3262148375525 | 52.0583273941813 | 76.7137782332689 | 55.5567699051046 |
|        | 42.4607795638552 |                  |                  |                  |
| DDN    | 45.2875173643252 | 38.9338521051669 | 38.2280071951674 | 44.4367387274922 |
|        | 68.307513091369  | 36.4986986135769 | 46.3057385979341 | 38.3684202018524 |
|        | 39.9444191873552 | 39.8873706855774 | 41.9083581529276 | 40.7704587752083 |
| DDO    | 43.2239171482126 | 48.9800181621986 | 51.7663108516261 | 39.5748670524951 |
|        | 39.6535880152834 | 43.006072841282  | 39.6222000738266 | 42.0778399888414 |
|        | 41.1742244762318 | 39.7397636748413 | 42.0750889188255 | 42.4322338033273 |
| DDOST  | 560.413725186282 | 906.833938613875 | 849.412637017524 | 459.92905629125  |
|        | 1152.55315876935 | 558.65313710197  | 911.661341702443 | 996.520340280883 |
|        | 1018.35211991691 | 621.980260052085 | 678.684833360104 | 539.32996290794  |
| DDR1   | 235.682605856428 | 246.313146942736 | 245.356135592468 | 48.4916117779992 |
|        | 167.095818680513 | 67.2397076992564 | 227.170944398338 | 142.789889238338 |
|        | 357.574415292533 | 260.185079572615 | 246.568253751149 | 209.31241212773  |
| DDR2   | 60.0793579902362 | 50.3586212130973 | 43.2721716572958 | 79.7061415085215 |
|        | 49.0828761839116 | 173.08677862231  | 42.8684958525042 | 55.0698932795613 |
|        | 43.7078399718247 | 80.3915591207869 | 102.304422999511 | 84.5354986509039 |
| DDT    | 594.611678976716 | 959.549658414082 | 479.318513108472 | 666.816487335088 |
|        | 1588.70376317303 | 884.036280777358 | 2108.03351084959 | 700.010354583503 |
|        | 928.230419226078 | 796.359355922952 | 792.022171185649 | 846.773659307087 |

|              |                  |                  |                  |                  |
|--------------|------------------|------------------|------------------|------------------|
| DDX1         | 1470.84169670955 | 862.031722874406 | 788.232434009173 | 696.529869192906 |
|              | 1313.92053019421 | 1120.83891847181 | 2004.94135236716 | 1925.20977162704 |
|              | 923.470702344816 | 906.833938613875 | 889.638287212686 | 906.833938613875 |
| DDX10        | 225.50098418159  | 169.603165827302 | 139.445008123768 | 128.786137360755 |
|              | 332.322497133752 | 214.980684661682 | 184.808179948172 | 292.156216736355 |
|              | 170.750057881363 | 170.255635587223 | 179.214713709599 | 176.064476306748 |
| DDX11        | 54.0536858212253 | 52.6398559444048 | 67.7235257493648 | 42.8899872337087 |
|              | 54.1745577382276 | 51.1621379498014 | 63.2113624676341 | 47.6397712007919 |
|              | 63.2409684531772 | 54.7061116419212 | 49.4145011642763 | 54.3820590274321 |
| DDX12        | 46.7728879680671 | 43.1524467741439 | 47.8360317478571 | 42.7577133601564 |
|              | 43.1914709389238 | 39.6575367310267 | 45.402658694824  | 43.0963492115408 |
|              | 46.4520905520834 | 47.9885084629869 | 43.6897331183502 | 42.434729228822  |
| DDX17        | 130.336599857526 | 154.455976468088 | 181.2179249806   | 154.93193897888  |
|              | 113.388372364837 | 118.010166045155 | 140.128033028434 | 155.956315815754 |
|              | 116.318299211619 | 217.743953847269 | 193.569399061809 | 172.777241940677 |
| DDX18        | 427.451886998067 | 537.213035625492 | 355.67721196018  | 453.652548085387 |
|              | 667.837116137964 | 565.411298018845 | 362.927960895643 | 377.491895827114 |
|              | 446.613670519745 | 372.473625569296 | 451.290681710534 | 427.540236966999 |
| DDX19-DDX19L | 51.413025495745  | 48.7847528954724 | 47.5673419710251 |                  |
|              | 51.0175677516029 | 57.8039717833131 | 43.8582747295766 | 46.5650556481721 |
|              | 48.7814131120945 | 48.4869909888679 | 42.8936990772838 | 55.3147456054175 |
|              | 42.7782216342806 |                  |                  |                  |
| DDX19A       | 183.2003374677   | 146.268519891864 | 187.711309781257 |                  |
|              | 141.043326064913 | 170.829628173552 | 181.531005915656 | 184.536327776767 |
|              | 232.048938339214 | 165.992057520727 | 166.129723762515 | 226.580055691897 |
|              | 170.593589984253 |                  |                  |                  |
| DDX19B       | 153.237127853072 | 197.598956071422 | 286.68367978144  |                  |
|              | 165.72797054597  | 166.25909484446  | 159.937192675974 | 182.31306890697  |
|              | 179.694413858411 | 172.574996256912 | 146.840603547323 | 130.72385089567  |
|              | 129.605603092944 |                  |                  |                  |
| DDX20        | 40.3478825593224 | 43.2649781354792 | 42.3536549114165 | 41.3027031037343 |
|              | 39.9697332660833 | 48.0350549043063 | 42.7431359850339 | 41.9315419791594 |
|              | 46.0106098064475 | 49.8393069675192 | 49.5923712603197 | 46.4499258373233 |
| DDX21        | 197.776069056927 | 310.900527198512 | 188.008141649466 | 410.808988840343 |
|              | 398.641868389511 | 332.490954010208 | 215.800662077432 | 166.1490536844   |
|              | 602.726022292973 | 105.53472751588  | 152.843785599892 | 290.710970844525 |
| DDX23        | 347.486523804413 | 346.438778257772 | 300.732955139561 | 253.140146266702 |
|              | 259.332340491331 | 305.959643033169 | 434.223722811041 | 369.032450063274 |
|              | 502.67939538729  | 300.762511215441 | 350.796638646601 | 265.570814613305 |
| DDX24        | 477.263677441074 | 221.450737998571 | 321.686871145301 | 326.963277148673 |
|              | 331.474920376907 | 602.441843384617 | 275.096637886925 | 241.017227991238 |
|              | 333.493839176426 | 499.744856832174 | 439.558287621096 | 398.049525642349 |
| DDX25        | 43.5710871617107 | 38.6704566269103 | 42.108130037421  | 43.9744941494111 |
|              | 40.9416717019827 | 38.6704566269103 | 40.0052661202207 | 41.6466169548846 |
|              | 41.5635499110307 | 40.9558083259517 | 43.0971787292711 | 44.2527566343661 |
| DDX26B       | 42.3620028137457 | 48.2220547806679 | 50.5505693464794 |                  |
|              | 42.2496337895968 | 49.6507190068324 | 41.9069736908705 | 45.6042625176633 |
|              | 50.3972033014227 | 45.4799270968969 | 48.0211752672327 | 43.0710577955487 |
|              | 48.6795178347248 |                  |                  |                  |
| DDX27        | 80.6434122355417 | 91.3941563889513 | 71.0340758556049 | 55.8709511400674 |
|              | 71.7263663921367 | 89.2185019250322 | 109.615289274998 | 113.917429432477 |
|              | 79.856662992182  | 68.6788460999238 | 80.7198077526005 | 61.8529316708431 |

|       |                  |                   |                  |                  |
|-------|------------------|-------------------|------------------|------------------|
| DDX28 | 73.1931742801095 | 61.5429260998857  | 68.8098607236981 | 45.4634652319753 |
|       | 68.9766943946607 | 89.680151549258   | 115.98265270452  | 78.1448136847078 |
|       | 79.7882961549974 | 89.8035133597498  | 75.9802606133139 | 71.0340758556049 |
| DDX31 | 65.6165636276827 | 71.0593419018503  | 58.8188963227059 | 57.8277957325085 |
|       | 65.8319449883221 | 61.5635554619635  | 78.9900928241723 | 56.3106156221316 |
|       | 61.5807110546718 | 61.3529667465225  | 63.664265793911  | 58.9836017745712 |
| DDX39 | 277.367257933324 | 445.644244692294  | 352.339572553069 | 450.139987981805 |
|       | 1057.44729389649 | 301.357530757236  | 495.359878931451 | 550.990544834571 |
|       | 551.915864019927 | 196.427458710993  | 251.803102904399 | 172.540737848092 |
| DDX3X | 295.5163490537   | 368.162822151919  | 337.51861578231  | 488.277500837251 |
|       | 287.494740260715 | 528.242677613584  | 281.906398109158 | 368.913147706435 |
|       | 462.362735276132 | 387.631477822638  | 310.900527198512 | 503.529187388654 |
| DDX3Y | 42.3433931248155 | 40.2493681589104  | 32.771863438151  | 42.357910063876  |
|       | 38.9496515344837 | 38.3418933808844  | 34.1889222434768 | 40.3357777530419 |
|       | 38.9006788676407 | 38.2069499294002  | 36.5359455830388 | 40.1700117452801 |
| DDX4  | 43.4626049853157 | 40.716553247236   | 38.1421709520616 | 42.8235313007746 |
|       | 36.08956004634   | 38.6414316877471  | 40.7910160811527 | 41.4508241771315 |
|       | 38.9834959368496 | 45.9004543328976  | 39.9899430628542 | 38.5279745308203 |
| DDX41 | 347.829279462722 | 121.744701580607  | 241.599353653369 | 212.813224717262 |
|       | 242.236207196941 | 147.704325041249  | 185.924923239764 | 220.337850438943 |
|       | 230.927097824131 | 203.651890041185  | 230.833432994593 | 169.818067865324 |
| DDX42 | 298.252355588344 | 221.76904201992   | 239.924746743429 | 193.806701229141 |
|       | 272.828896268482 | 368.318359434313  | 274.731304343034 | 282.196234758364 |
|       | 291.5513298383   | 350.106705208362  | 355.00914527669  | 313.046160403661 |
| DDX43 | 45.4799270968969 | 44.5884811528117  | 39.7411455670172 | 50.2163892855092 |
|       | 42.9090346219023 | 44.6524308640784  | 103.118579484715 | 47.2864663693787 |
|       | 40.6957787921451 | 44.4652605017595  | 41.3553369544097 | 42.2577689927563 |
| DDX46 | 80.3730667493235 | 121.236881661832  | 111.077646506425 | 103.139459009593 |
|       | 88.3954618645976 | 202.01900875263   | 132.172127966602 | 90.6347108049639 |
|       | 110.467254789988 | 109.192770642308  | 118.951970882732 | 116.547937420457 |
| DDX47 | 310.900527198512 | 312.40869171788   | 318.369837408344 | 222.368324930003 |
|       | 328.63511311303  | 311.241353755918  | 321.61848221455  | 316.604316194398 |
|       | 513.57613902662  | 262.534449975056  | 270.947794977829 | 481.905052451245 |
| DDX49 | 41.3387790895716 | 39.5050383901884  | 48.9944486068347 | 51.949834638817  |
|       | 40.6723334103791 | 49.3172204533818  | 62.801431502597  | 37.4484310268909 |
|       | 40.5912213523345 | 38.745552403895   | 49.7363778831003 | 46.8129509799753 |
| DDX5  | 2164.51925341969 | 2791.754651711135 | 2712.36664370642 | 2232.61002288121 |
|       | 2354.00192115549 | 2488.32876359853  | 2018.28984520892 | 1879.12037123353 |
|       | 2300.20602168385 | 1679.12630849964  | 1950.93175239958 | 2513.15722262176 |
| DDX50 | 179.994715581707 | 168.307676704652  | 168.640033281185 | 120.284321694275 |
|       | 141.410183156424 | 380.639020028302  | 224.665128374218 | 152.272399644814 |
|       | 559.763116301175 | 172.416351632442  | 178.306763765612 | 191.482692108417 |
| DDX51 | 1975.28674300761 | 1064.35745220225  | 1182.10714525377 | 1347.15664445545 |
|       | 922.047328788961 | 684.238999553691  | 1440.41726370246 | 2191.09005731751 |
|       | 795.381998233245 | 2220.90215179682  | 2077.74475301595 | 1689.77066894108 |
| DDX52 | 92.9323002425821 | 87.036020750455   | 76.093116738739  | 67.0402749076279 |
|       | 110.074666148474 | 69.4214927857472  | 113.539485042978 | 146.534713287435 |
|       | 115.044790975532 | 88.7928773498158  | 86.9543262608386 | 90.385018479478  |
| DDX53 | 43.0930293831497 | 43.0227387991135  | 41.0356368374708 | 39.5050383901884 |
|       | 39.3667161654772 | 39.8455060654531  | 40.4359177791566 | 39.7509165247419 |
|       | 39.9444191873552 | 40.8049408996274  | 37.3687900733549 | 39.1553169409075 |
| DDX54 | 116.042856605255 | 112.542326463419  | 70.0955779023465 | 87.6763065012524 |
|       | 120.825113658705 | 69.1523164481201  | 100.289042948128 | 60.6706478075023 |
|       | 121.737071786167 | 67.9259304928255  | 72.1090339831747 | 68.0751111916102 |

|        |                  |                  |                  |                  |
|--------|------------------|------------------|------------------|------------------|
| DDX55  | 161.48562926756  | 178.675242612997 | 123.162013735234 | 136.155022329495 |
|        | 151.451107406752 | 164.097531361519 | 156.719353642505 | 99.9896394343368 |
|        | 192.861174667738 | 145.050655626219 | 163.971002049561 | 172.192366002756 |
| DDX56  | 539.471011648536 | 355.67721196018  | 440.728435508514 | 234.873589896708 |
|        | 558.855313555287 | 289.909646207746 | 454.939614583134 | 408.353336724969 |
|        | 487.540800793233 | 565.72800641089  | 488.089090043145 | 350.106705208362 |
| DDX58  | 61.5882375235292 | 65.8082111065882 | 63.1450855271137 | 66.0397471691747 |
|        | 48.2748123114598 | 69.9819944829311 | 62.0404348860702 | 53.1052228246467 |
|        | 46.0106098064475 | 63.0119737420787 | 66.6788758487969 | 63.3578893149245 |
| DDX59  | 79.4832790698673 | 73.4687357112674 | 76.826527950236  | 69.5544840164738 |
|        | 55.6735944873518 | 71.5616860050001 | 63.8294437579951 | 87.4307271341692 |
|        | 57.4317879234275 | 68.4137459386155 | 61.2822647324366 | 77.6653462778309 |
| DDX6   | 43.4626049853157 | 41.0678614026819 | 40.4882741869718 | 50.5310598656998 |
|        | 38.8456942580061 | 41.9543948167375 | 45.1017494688414 | 58.5406981871153 |
|        | 50.401623258584  | 53.4109882045447 | 40.4504608195666 | 45.9693232070002 |
| DDX60  | 72.0334593545916 | 162.287617963536 | 136.766779297051 | 94.5501397951415 |
|        | 42.6022652963326 | 101.177486898065 | 72.4651758215622 | 66.6320017520888 |
|        | 82.5344501505114 | 55.6069214673486 | 70.8670844767965 | 55.4635297192076 |
| DEADC1 | 48.1125722136997 | 49.4982025424177 | 44.6032218589199 |                  |
|        | 43.6726153508978 | 44.0451487108213 | 42.9695585740813 | 49.6872467499977 |
|        | 44.7044140979108 | 41.9635525160083 | 45.0155543555707 | 47.299647867533  |
|        | 42.9887069977696 |                  |                  |                  |
| DEAF1  | 74.7206530065877 | 65.3319639385976 | 70.0059240383657 | 62.7108230507424 |
|        | 69.0975200641705 | 61.8571521441451 | 66.3775183389603 | 60.419911425109  |
|        | 66.6479153633977 | 73.7133884699889 | 73.0403099404    | 68.2708120569221 |
| DEC1   | 35.9305494063137 | 40.8880530359822 | 38.3166554965434 | 35.9521941716188 |
|        | 39.7568367479301 | 36.1190722948669 | 40.3302268293707 | 36.43924066428   |
|        | 39.5806465938526 | 39.1621898366355 | 40.1742127891824 | 45.1735152121056 |
| DECR1  | 426.276230164353 | 815.810781070699 | 553.328261478032 | 295.014183084118 |
|        | 353.598144765197 | 211.451463038315 | 380.541502795438 | 401.202348352506 |
|        | 512.951288394692 | 360.668308246913 | 329.978705095448 | 344.657779779036 |
| DECR2  | 162.272853632419 | 130.239763076999 | 242.751164798133 | 95.7571966348067 |
|        | 200.384444538476 | 133.514641336669 | 296.842555066902 | 92.681224908389  |
|        | 221.22852405053  | 152.72007888133  | 151.255948388415 | 121.851515410237 |
| DEDD   | 171.877918435017 | 111.845105854608 | 142.49850553035  | 113.528908699366 |
|        | 161.948193932343 | 105.997702773537 | 117.181144429729 | 95.6731932757489 |
|        | 370.917477324773 | 133.314819245044 | 105.53472751588  | 105.267519627444 |
| DEDD2  | 282.764445883135 | 164.735191308776 | 177.958475301951 | 283.393280512514 |
|        | 165.522304431988 | 121.236881661832 | 216.782658096982 | 211.685526927495 |
|        | 265.728967648382 | 190.592556065939 | 241.736113354506 | 208.878921620914 |
| DEF6   | 69.6449298794042 | 94.1289383735162 | 116.709906902201 | 147.52790076468  |
|        | 71.2787833369055 | 61.9432904657734 | 91.5258329186709 | 68.4659783447092 |
|        | 99.9896394343368 | 120.447568925399 | 112.565968152932 | 91.531459931855  |
| DEF8   | 138.82907142482  | 119.124583755587 | 149.139710097196 | 166.847053797281 |
|        | 151.775928080246 | 144.046404221564 | 157.001241754359 | 101.516595046503 |
|        | 98.3126451737573 | 108.251353392321 | 109.155021443311 | 122.914175013196 |
| DEFA1  | 37.55264801907   | 36.5219488315447 | 47.0055981216687 | 100.606802642042 |
|        | 38.4540849632254 | 50.2163892855092 | 46.7100796279384 | 38.5457716679071 |
|        | 34.5633623842083 | 94.0777119695783 | 41.4508241771315 | 47.6040671292013 |
| DEFA3  | 41.3387790895716 | 38.9338521051669 | 38.2280071951674 | 64.0903425729408 |
|        | 40.9950639693255 | 41.8613406887824 | 46.7100796279384 | 37.7612949798895 |
|        | 42.5406888281114 | 76.7137782332689 | 38.2795150354677 | 43.0930293831497 |

DEFA4 42.9104454767916 45.4882438975269 53.0104469636221 46.7577982595088  
48.3814421939888 45.6129956328415 50.5252048155459 43.0390857698452  
50.401623258584 46.8954576545929 37.9946685306274 43.2776458914333  
DEFA5 37.2474303302343 37.8217989841918 41.8751578329365 40.4359177791566  
41.1868052124344 40.650742261428 34.9344532055397 43.5544347011646  
40.7847110517594 37.2089297656361 45.390192977585 42.57175366709  
DEFA6 33.4240466670776 33.5924201549249 43.4709415392696 35.1451084093692  
40.0599807618105 38.5252456306656 44.6032218589199 34.806104801006  
43.1805016690297 38.745552403895 37.0180934800573 37.4554876386402  
DEFB1 141.087571926258 48.4497719907777 307.754078087321 82.7394574977114  
103.619396986593 46.7800033479223 48.1747307200218 110.287699369482  
129.754481922118 383.578947165143 122.469733727349 533.644397257453  
DEFB103A 42.7150227340364 45.6533175604486 42.7303139017786  
41.3027031037343 37.4470183315826 41.554942319225 50.6774883370457  
42.7431359850339 44.7058233759912 43.7303813515864 40.1742127891824  
42.1537476443423  
DEFB103B 44.7044140979108 40.2493681589104 42.2577689927563  
70.2541961995753 44.2607789091176 37.2686490268265 41.9393838138203  
42.7431359850339 42.6762317063737 40.1179210534118 43.3085358214154  
43.4709415392696  
DEFB104A 39.5676051939342 42.8542642792862 42.157627240486  
40.7481155008596 35.2163900400329 41.7627910693483 42.0605906240248  
39.9576138799997 47.9035532886869 39.4710743516517 42.911855821602  
42.4607795638552  
DEFB104B 34.6977013306396 39.6995529770239 35.7105247506212  
39.6292788039793 41.3755760434934 39.132725377815 35.7055410599146  
36.5393857306744 33.9456837661864 41.3321861371202 40.723990462047  
41.0657892043496  
DEFB105A 36.1232327599945 34.0382693188794 44.0451487108213  
36.9912468186322 44.0451487108213 41.4508241771315 42.629412460409  
41.6466169548846 38.3418933808844 44.7958122466628 40.1742127891824  
41.3481355128089  
DEFB106A 35.0202257459026 39.6995529770239 37.8386378737561  
37.1894304543751 39.4693871570028 41.2567470068038 39.6535880152834  
36.5393857306744 42.6366765186182 36.9102644736882 39.7342718293432  
36.3454320848591  
DEFB106B 45.6517320730042 46.29198852834 33.1559412791294  
49.3654837541353 45.5809132232681 38.2293008890613 43.6753843488695  
40.5158867964016 47.3791873993182 47.9056710878325 46.6442692119997  
44.3521099857368  
DEFB107A 52.0299937917925 46.4385386401326 47.9035532886869  
44.1483976313959 46.6397391251762 44.3648993568405 45.223075311113  
46.7980335276155 45.0017158586743 41.5435611403119 45.9104478407175  
44.5432192783161  
DEFB108B 35.7012997405508 43.896638326678 39.5118967430322  
40.5484717678957 37.3785704939904 40.2945586900975 45.8980298854198  
37.7612949798895 41.1742244762318 42.3606390470387 42.8263096141654  
37.6557714476853  
DEFB109 42.8036731479932 40.6380495994768 38.8775560911841  
46.0228732507872 42.0709558258414 41.0582900711341 39.1539892144371  
42.2577689927563 38.2215591930186 43.6033221838149 41.9083581529276  
42.0424641526302  
DEFB110 34.8099089553046 41.8848959280916 39.9101908547397  
38.6414316877471 40.2449343247539 47.6803619768589 44.8643898647322

34.9580369221164 42.0621425894624 36.8059561571675 37.5583886316038  
38.2350720635382  
DEFB111 39.3709357615493 42.4493032770053 41.8751578329365  
37.1894304543751 37.5556299264699 37.2686490268265 42.9803717121865  
40.4359177791566 43.9450023643394 42.0621425894624 40.9157352260901  
39.9519547348106  
DEFB112 37.0320432433314 39.9697332660833 36.5474283500601  
37.9875302985336 38.2496050953547 39.6251842352088 41.0381860307445  
41.1575777497576 37.1820543575123 34.7308008643142 32.9879066304034  
37.8490162439785  
DEFB114 41.9407041937973 36.5219488315447 38.0958223740111  
38.042028333747 37.4937394063612 36.8059561571675 41.4742337714895  
40.5640952422779 38.4970433581463 37.0740019672788 39.153226699662  
40.5703581862752  
DEFB118 41.4508241771315 42.6939394537076 45.310660704531  
42.1273928203021 40.148780650831 43.1826328292558 45.7452456977857  
43.5544347011646 39.9444191873552 43.0919221375514 45.6348103033479  
39.6352613956998  
DEFB119 45.0283997415478 50.8114699212931 56.8168526942685  
43.1275490164761 60.3768221891131 54.0104259381604 50.1185085888209  
55.3664856922473 50.4974478884077 49.7728344236992 51.5573930741898  
47.1060577218993  
DEFB121 32.821392987958 36.3110701990588 32.2133093774284  
33.9645433044281 39.1650142708257 35.0970060242246 36.197424053556  
40.3357777530419 33.2715481910159 37.4302011516587 31.3142073726046  
37.7526485343328  
DEFB122 37.1485601150873 41.159706131351 38.8775560911841  
37.8442841690502 37.0526522140242 36.6271061451613 44.0687697278114  
44.5029690493211 39.5806465938526 37.2089297656361 42.170702295259  
41.2437378488025  
DEFB123 38.957687788868 42.6022652963326 37.1643693306382  
40.0698728584484 41.467005949568 37.9951997351435 42.7431359850339  
38.8495095797881 42.6366765186182 37.1275334308172 42.357910063876  
39.7411455670172  
DEFB124 40.6559419616644 40.148780650831 51.6159542017038  
46.3203995372658 41.3755760434934 45.0882356578404 40.9157352260901  
42.2577689927563 38.6322728994674 46.2286164776607 40.9157352260901  
41.4508241771315  
DEFB125 44.7915315085948 49.5443425465542 42.5406888281114  
61.2213001749372 51.0107745412152 42.9695585740813 44.3440839686558  
42.5435283762933 51.7549258776884 42.6793753550854 47.5439485437351  
46.8129509799753  
DEFB126 112.211717641877 38.6414316877471 37.7384958256497  
31.1401844809132 46.9906120932727 35.9305494063137 41.706879587091  
49.2019743609873 40.137818555383 38.2069499294002 35.5179217192467  
37.2810767789306  
DEFB127 36.0144420013819 40.3384318592985 40.4882741869718  
39.5050383901884 39.9697332660833 37.7000400506818 40.6750540874299  
41.7419877611072 38.9006788676407 35.6208308220005 29.9617615620508  
36.7762265039864  
DEFB128 42.2455707947223 42.0709558258414 47.4740726032707  
36.9912468186322 42.7982502551634 44.1737502492846 45.8980298854198  
43.6434576713809 46.581796165231 40.5090849993014 41.8168470823451  
45.0985088502363

DEFB129 44.6231541342 43.0227387991135 34.8956628705329  
39.1706564265495 41.5668884168669 42.0574848021044 42.1607322031054  
40.2382908228517 38.2215591930186 42.5664883002833 43.3085358214154  
43.7672102682067

DEFB131 51.6558970571712 46.7980335276155 42.9641759692926  
52.2089306840125 44.3557408297309 50.9724155054821 48.5544398725959  
52.5586058896479 48.7358147030082 47.5543691541633 46.29198852834  
44.0451487108213

DEFB134 45.9090659324223 39.8695929627783 42.5406888281114  
39.066284740632 39.859345745831 38.2293008890613 32.2133093774284  
39.6474008369935 40.5912213523345 37.4302011516587 34.8383995317036  
34.6720534245631

DEFB136 40.0557788909923 40.2493681589104 40.5734458834617  
38.4208429103799 39.0564222526273 38.2293008890613 35.8227939208521  
41.5464765641928 38.6322728994674 35.0668743708816 37.6484782516569  
39.7411455670172

DEFB137 43.844855336215 36.5219488315447 37.0642268327439  
42.8235313007746 41.0885562160946 38.6414316877471 44.3440839686558  
44.5029690493211 40.2274522635576 42.0621425894624 41.2598458726002  
40.5703581862752

DEFB32 40.2087556903277 37.1685072112618 40.148780650831  
41.2551966132486 39.7210115145672 35.4142595025086 42.3194600586894  
40.2770232552555 39.0775870687758 37.4642807402741 37.9230440150891  
41.7575097298927

DEFB4 30.9241129241985 41.3610369241157 44.5134109184888 176.816741656659  
42.9090346219023 40.9506062495231 38.1793598983615 40.7311497914871  
36.9060997041453 36.5806287103157 36.2435874904689 36.5474283500601

DEGS1 253.333114749013 157.856158440506 195.968119243879 486.044304392285  
221.015209694864 404.175196605897 230.787791652978 241.202687910704  
227.598514023545 239.96421556928 225.201522281399 335.818251279914

DEGS2 48.6621527194963 58.3164247463092 153.165464817911 45.334106390212  
46.9906120932727 42.2577689927563 52.8496345990125 63.5295088521896  
128.05521008708 135.540738841602 148.043320937247 65.1251519077199

DEK 290.956194006554 298.089522641269 309.593721653575 280.239058266018  
472.982369155078 425.776214512634 1756.86714809925 554.163106145921  
464.99944459917 183.799353414581 195.221917652149 340.607959072657

DENND1A 79.7102196041395 53.4735821194294 47.5216423686268  
83.2083460752986 60.7942162859036 55.2336859873958 77.2906963563431  
50.5734308316823 51.4749724393807 53.3325829174829 49.319499137678  
49.7069910376039

DENND1B 43.9309845324767 39.6995529770239 39.7411455670172  
35.49696651597 38.3561682218911 37.2686490268265 35.2163900400329  
46.4672637826582 35.9645119596869 43.4885245598939 44.9713479185144  
43.8575940017119

DENND1C 35.7012997405508 48.8584917918986 41.785676764591  
61.2213001749372 44.2607789091176 45.0882356578404 50.0088611244948  
43.6434576713809 39.853866204927 46.7646877499666 43.844855336215  
41.6550823405646

DENND2A 223.501516374076 63.4570909617664 68.9522412475296  
68.9937449813561 98.0143500562821 227.739219647972 132.541333041312  
134.743068051122 47.6195009345747 145.819204020818 136.250317107253  
83.2925226467532

DENND2C 55.9249770393176 42.7275315121163 47.8263530599296  
41.4273122914951 46.0977687311222 48.4758590019384 41.8751578329365

47.5439485437351 94.6734338650799 115.735359157053 119.015431849218  
104.313754953569  
DENND2D 81.3544712349691 886.397061577531 486.911782180966  
327.283431584541 186.54041506387 101.693848821246 189.204794959564  
111.714563124738 293.086409068972 468.153823329361 429.65084326307  
586.508419046212  
DENND3 62.1448806673973 55.9644250454789 86.1563473462864  
231.990562664196 45.8051846088552 66.1082848714279 63.7721358300879  
52.1788489555942 48.3119523820103 52.3304586399695 48.9754340235127  
49.4786466722535  
DENND4A 46.0023068797812 52.6999535920753 47.0055981216687  
55.9563971339766 53.0006136299899 57.0775902639215 50.0088611244948  
46.0633179231318 52.2216613535546 53.4109882045447 48.0987228351168  
60.8662233098324  
DENND4C 461.123856163975 332.322497133752 215.645475520124  
231.824347524066 227.504982571709 310.763904671301 501.585246203512  
497.591040004541 322.888035865453 1291.71781703042 872.305108096296  
543.975237512604  
DENND5B 63.8626921347231 62.6236991757723 47.646800205189  
100.001150612051 57.8039717833131 107.646103699516 51.5967098638347  
59.1107691694766 60.9594847577747 51.9547984751408 45.9104478407175  
48.6037684272115  
DENR 410.402285012885 336.390195295291 325.769076169162 286.927016665685  
357.762505796238 285.322305931794 390.202312411165 413.723725202787  
421.971171686029 439.558287621096 393.648308810931 380.988918630713  
DEPDC1 48.4849194706125 52.8264142735929 45.0985088502363  
44.9370339275041 56.2305155589239 36.1190722948669 63.6695826053997  
58.9081750508316 43.5669306063196 40.1613888954735 41.0476065156912  
46.4499258373233  
DEPDC1B 57.6285775590145 62.7743500747415 45.0985088502363  
37.651298468202 66.7977843897621 41.554942319225 63.7721358300879  
56.1838945110653 71.8576824255215 41.0057887014368 41.3553369544097  
37.2291018661279  
DEPDC4 37.4554876386402 44.5544727111028 44.2733573199954  
41.4727452533295 42.3685136297603 38.1169703906207 45.0283997415478  
42.0494116081998 44.1519466943185 41.1222709786153 45.3597029614942  
42.3152792870779  
DEPDC5 50.4289272827382 51.0744829992368 50.1860191642359  
45.5163397926116 47.0954207417646 48.2067028894909 56.566634814242  
57.1362071277099 52.2269052457335 56.1186281675573 57.7786197537899  
49.5265949137207  
DEPDC6 193.981651711507 90.3188163079532 128.596547789044  
49.260242314197 45.6895223823001 68.6424653037264 51.9950964009224  
70.5322939116406 169.889618506937 75.257352283328 75.8056934060866  
73.2234405348435  
DEPDC7 47.8832476959752 42.6022652963326 42.2857372794461  
40.4359177791566 47.1719672813096 42.0902716047029 41.1507980856436  
43.3729486804084 49.2879849674517 41.483412492426 43.0016969050339  
43.9379963884747  
DERA 820.147156401172 457.860665614779 444.618035487523 574.467486140819  
278.773982275525 467.764770176415 730.168814097451 365.401746744015  
618.892379887961 336.44013572926 337.084861453686 549.67905283016



|         |                  |                  |                  |                  |
|---------|------------------|------------------|------------------|------------------|
| DERL1   | 422.702925141293 | 515.409979010663 | 251.374750265492 | 393.209708455013 |
|         | 264.495576211074 | 199.035083736742 | 177.27613997459  | 169.557757933574 |
|         | 332.830805115112 | 158.308338986864 | 190.647389246848 | 273.934014944673 |
| DERL2   | 171.021755568144 | 121.036604456449 | 143.251956814524 | 179.07886477603  |
|         | 103.619396986593 | 102.711934290382 | 169.633672522325 | 133.060894083935 |
|         | 150.789911774534 | 105.05842887748  | 106.985301705486 | 124.18058128276  |
| DERL3   | 48.5123041297835 | 50.2696827764943 | 46.7058093820839 | 54.6089451252049 |
|         | 44.2120774064277 | 41.159706131351  | 44.8643898647322 | 44.8997235283254 |
|         | 38.8495095797881 | 42.9866214102525 | 40.4504608195666 | 40.7704587752083 |
| DERPC   | 69.6449298794042 | 73.1640951333742 | 75.2977438265751 | 66.5921967967793 |
|         | 70.3677225924146 | 62.6839349907803 | 78.6402083787251 | 50.3082459161777 |
|         | 69.0037087543684 | 47.3791873993182 | 51.1483696410762 | 52.6922486991742 |
| DES     | 89.0495215957248 | 62.5528124447176 | 57.50915811428   | 90.2790229242453 |
|         | 58.8961770381033 | 2689.80835574654 | 39.2533668167483 | 106.140215438654 |
|         | 39.9444191873552 | 3176.96480659196 | 3478.67753301901 | 2225.65559724391 |
| DET1    | 79.953657052127  | 74.1282220615085 | 66.288032400574  | 78.0020909283414 |
|         | 77.4769634299218 | 104.17651993553  | 87.0685571351947 | 72.93977835851   |
|         | 73.0403099404    | 93.9018973330737 | 102.471939526704 | 86.7710020879725 |
| DEXI    | 240.476103976894 | 300.412043023998 | 414.539381761279 | 151.740176274202 |
|         | 274.398580571984 | 400.8670859408   | 179.886168478179 | 244.498602338731 |
|         | 260.062749979574 | 326.303950252592 | 305.959643033169 | 280.275836993258 |
| DFFA    | 81.0766789453664 | 99.4123924179498 | 109.649431670339 | 66.4510869175159 |
|         | 224.030034866938 | 112.007118067348 | 150.562062400737 | 97.2750076101755 |
|         | 89.9227845135785 | 85.5439309325541 | 101.008449241109 | 107.513442725922 |
| DFFB    | 73.7800733276454 | 64.3640973625938 | 72.6182747525443 | 57.4595416719581 |
|         | 103.913834330352 | 56.9320717885002 | 62.801431502597  | 60.0372015630618 |
|         | 60.9311907846259 | 59.3299869707613 | 62.8753829543444 | 66.4229480716045 |
| DFNA5   | 224.202855268674 | 135.836577310513 | 180.128769312512 | 456.023620287811 |
|         | 67.6011992144113 | 325.172633427119 | 148.770228614661 | 165.640362974584 |
|         | 75.5681913475287 | 296.933220681369 | 224.450710664296 | 493.322302312578 |
| DFNB31  | 79.8844295847317 | 48.3699741879723 | 54.5191471810265 |                  |
|         | 57.0629653735694 | 48.6224651100733 | 51.294537308199  | 49.8281348927244 |
|         | 54.3820590274321 | 49.8304479381623 | 57.4665857273093 | 55.0404566626821 |
|         | 52.8455400026194 |                  |                  |                  |
| DFNB59  | 41.2424637338424 | 42.5624638829203 | 45.7452456977857 |                  |
|         | 39.2406797798509 | 43.9450023643394 | 40.4753617660107 | 39.8695929627783 |
|         | 45.2230753111113 | 44.476519804187  | 46.1390887492649 | 41.9083581529276 |
|         | 43.7410507935043 |                  |                  |                  |
| DGAT1   | 134.519244495139 | 176.07173250529  | 149.832238573027 | 120.980558571109 |
|         | 152.792457231813 | 100.883604376864 | 95.8149149211251 | 123.506372870621 |
|         | 134.749803376372 | 173.694418385132 | 117.586275152761 | 109.922909644299 |
| DGAT2   | 42.1537476443423 | 57.2231446406982 | 68.3234331335073 | 66.5921967967793 |
|         | 47.5647821785529 | 45.3882138838137 | 48.8319884367456 | 72.121833189378  |
|         | 57.678188678075  | 76.8998454389745 | 54.1963147679251 | 60.2550788540864 |
| DGAT2L3 | 42.0532901689036 | 40.148780650831  | 37.9482157381008 |                  |
|         | 42.6913548400127 | 48.5000946421718 | 44.4619248757502 | 41.4742337714895 |
|         | 45.8669209716694 | 45.0997987980157 | 40.6022003765153 | 41.1638563416981 |
|         | 42.2577689927563 |                  |                  |                  |
| DGAT2L4 | 42.442231667357  | 39.3999056968598 | 41.3366779545815 |                  |
|         | 43.074472921841  | 40.9950639693255 | 46.1513019317765 | 42.8684958525042 |
|         | 37.33030683349   | 42.1594905198929 | 36.2435874904689 | 38.079222289614  |
|         | 43.3744503319109 |                  |                  |                  |
| DGAT2L6 | 46.6348258763289 | 35.3307157989724 | 37.0642268327439 |                  |
|         | 43.074472921841  | 37.8679241954337 | 43.7630587657205 | 38.7337086062875 |

40.4359177791566 32.4931776430014 38.4187686307607 32.775958132716  
 39.7411455670172  
 DGCR14 58.4920021605316 58.8281931439093 56.8168526942685  
 51.1055541075029 63.0383605052305 65.0774755750423 60.6548851977964  
 59.5080588072694 65.4784797364469 62.8753829543444 66.7826466218147  
 63.6254894053045  
 DGCR2 288.816567137193 250.086163187797 184.536327776767 147.285007921741  
 190.242383482058 172.102568448455 183.702709922933 298.848001894468  
 309.994784298282 369.258587948416 368.078954546259 198.360449141425  
 DGCR5 60.4593810615882 41.554942319225 41.0356368374708 43.9282059368202  
 43.9450023643394 41.0582900711341 45.4799270968969 67.8061298261394  
 39.9444191873552 41.1222709786153 39.2542963855807 43.3744503319109  
 DGCR6 298.54401957868 178.249889756228 213.933347509147 251.905799624693  
 211.654245727798 324.506136847875 312.589169184897 276.399037769005  
 273.849703944739 243.27954361539 190.487609390723 149.45630414346  
 DGCR8 197.171449112363 300.121875447445 210.843643231855 121.562769658314  
 179.994715581707 153.992331037033 303.281551940647 193.782527748199  
 195.893183546434 230.142262693206 145.09364961191 125.661351053514  
 DGKA 49.9890328304193 99.2432911346944 185.874151272261 64.2690842803282  
 47.6206419177008 50.5499559337071 51.540723788287 60.6237094449088  
 84.7782034884529 118.288549974348 93.7444359334292 112.23915619297  
 DGKB 37.55264801907 37.3255455874046 36.769073068743 41.5937402943136  
 37.8357959615237 47.6251784943271 37.9430145836712 38.7981173437121  
 40.5491080069964 43.3438593008468 44.0627228016455 44.0299389687796  
 DGKD 41.7397731376692 41.2598458726002 42.4917160307066 43.1131704517186  
 42.7982502551634 37.0740019672788 41.4397539024976 40.6628537260412  
 37.9793521263255 44.2580151149956 43.8923243437146 40.5207392413115  
 DGKE 38.2083710281545 45.4143854024453 43.0971787292711 45.8844325913247  
 39.7568367479301 38.3418933808844 36.5352572191451 50.3082459161777  
 48.8067321016961 36.3612409063792 37.8372168909583 35.4484652445078  
 DGKG 39.5676051939342 48.4980626712175 35.9305494063137 38.745552403895  
 46.6397391251762 49.4157684139858 45.223075311113 38.3684202018524  
 50.7619345314571 44.3648993568405 41.8168470823451 42.9887069977696  
 DGKH 37.55264801907 39.2907645923217 40.6312687664188 38.6414316877471  
 40.831207953647 40.5805725503899 40.4941260038116 39.6995529770239  
 40.9901805728485 38.151911051187 39.4749602565407 45.6233434183356  
 DGKI 46.0023068797812 38.6414316877471 41.3366779545815 42.9358255168086  
 38.6454098044474 44.0804700754786 38.4005795891396 39.4710743516517  
 43.0930293831497 37.6383530120621 46.6442692119997 38.745552403895  
 DGKK 41.1523487516364 40.6380495994768 42.157627240486 37.8442841690502  
 43.1252272136667 40.3357777530419 39.1539892144371 41.0381860307445  
 37.8319142847141 42.1622837416589 38.2795150354677 38.5279745308203  
 DGKQ 112.865496075486 225.056827821165 311.241353755918 142.545268664218  
 218.958199087236 97.2865629929716 86.4898752526885 122.748811531184  
 136.843285454801 161.793366042179 125.891602778425 121.696160351886  
 DGKZ 39.6349162264993 41.1262212547458 41.263535866568 38.6414316877471  
 39.4693871570028 39.3638967048812 42.0016830644258 42.6808744813778  
 37.8685585043426 38.9271399577966 40.0394833064005 37.8115992568331  
 DGUOK 488.908231529696 564.929183025034 492.519023728038 384.522115820048  
 450.759762047652 327.984902171255 497.591040004541 520.415257194417  
 495.705224781189 515.216890329893 432.669787408904 424.539111965342  
 DHCR24 318.069132873489 62.3102413989199 91.5230424957075  
 64.2130157241811 139.08163074096 63.2343637481705 212.822978676596

|         |                  |                  |                  |                   |
|---------|------------------|------------------|------------------|-------------------|
|         | 141.376779431031 | 219.918644151214 | 50.6486940895674 | 51.838002904753   |
|         | 56.5225014032155 |                  |                  |                   |
| DHCR7   | 238.077051775147 | 172.720244584464 | 240.086349973689 | 160.883501367581  |
|         | 428.8440159628   | 100.650129064849 | 374.297474141009 | 301.198565023795  |
|         | 2951.88559311416 | 132.107655569343 | 127.2070318269   | 109.294124176508  |
| DHDDS   | 128.635811501506 | 97.095992167029  | 106.443777149496 | 97.3066473777771  |
|         | 165.684719727205 | 95.9391851122771 | 115.441414762268 | 149.950764820034  |
|         | 107.148000219752 | 146.90802741139  | 131.451150955309 | 101.250422688816  |
| DHDH    | 57.6285775590145 | 38.2263227947189 | 66.737740728688  | 54.4586176399381  |
|         | 142.731630650904 | 59.5979861826984 | 107.748050894857 | 71.7336217321663  |
|         | 134.968128884298 | 57.6791750431251 | 55.2374601141719 | 61.7502624458447  |
| DHFR    | 48.1125722136997 | 50.7487159427973 | 46.4569566520107 | 42.4580504587581  |
|         | 43.844855336215  | 49.9699131196797 | 41.706879587091  | 43.2551508830106  |
|         | 51.0062122023297 | 36.5806287103157 | 42.6366765186182 | 34.1509644696334  |
| DHFRL1  | 67.3269632644926 | 63.9179552265502 | 63.3544794716167 |                   |
|         | 64.2926204688673 | 57.9161791762225 | 77.8490019489375 | 69.779139490544   |
|         | 65.7833930916483 | 74.7934385405346 | 98.9222919411067 | 81.8648220673828  |
|         | 71.9771425105735 |                  |                  |                   |
| DHH     | 38.8561375693335 | 40.8880530359822 | 45.3974838013476 | 38.6414316877471  |
|         | 40.8873907150245 | 47.0027453663546 | 39.3585350448719 | 36.0306975524309  |
|         | 40.6957787921451 | 44.2580151149956 | 39.8184668132023 | 43.5738557773903  |
| DHODH   | 45.0283997415478 | 50.8460732110055 | 51.4308501933893 | 40.2455972565968  |
|         | 45.1137938810047 | 50.164201758929  | 47.2927436772465 | 43.0930293831497  |
|         | 51.3511088648386 | 42.1317134987795 | 44.7114813656401 | 45.9104478407175  |
| DHPS    | 214.03015073442  | 292.065366215278 | 311.810240385503 | 240.731386634957  |
|         | 346.438778257772 | 284.795064481553 | 290.031202636467 | 180.53214143537   |
|         | 269.184000351658 | 355.7118155732   | 301.025314855652 | 322.678762360476  |
| DHRS1   | 330.550018306903 | 270.947794977829 | 503.793770799548 | 184.235914591152  |
|         | 262.579533452771 | 233.294970051779 | 119.277678423944 | 321.069136463599  |
|         | 154.551927302005 | 383.966991071954 | 232.320396482547 | 346.621778258188  |
| DHRS12  | 51.8781065691038 | 57.4844872128664 | 64.4512696384839 |                   |
|         | 59.2778887402357 | 47.1719672813096 | 68.5174271063894 | 64.4127389689053  |
|         | 53.4768201292155 | 53.0596635022268 | 66.4958411147116 | 59.897987870592   |
|         | 51.2623287419357 |                  |                  |                   |
| DHRS13  | 47.9175508887533 | 45.2556760873335 | 47.7737810047679 |                   |
|         | 36.0481934423077 | 51.1368583672022 | 36.0306975524309 | 56.9320717885002  |
|         | 47.5950227477807 | 76.8864157610323 | 63.7836577144372 | 51.2318935933116  |
|         | 65.2771529943605 |                  |                  |                   |
| DHRS2   | 319.871452890512 | 1199.29782389306 | 1118.62223628039 | 53.7155925246916  |
|         | 744.080606078086 | 185.139615829489 | 494.733185937057 | 707.4124863603    |
|         | 565.72800641089  | 1554.42895572029 | 1573.61108703981 | 1224.80240464583  |
| DHRS3   | 266.439343650315 | 253.398345052444 | 473.223156200183 | 272.36028618845   |
|         | 301.904682664871 | 409.724772942357 | 361.945511835039 | 220.621142396402  |
|         | 1490.1549980903  | 1418.94307844471 | 821.922096305069 | 1796.47241860175  |
| DHRS4   | 231.198764780818 | 265.026710493466 | 326.500804513133 | 412.421643885499  |
|         | 173.035987237848 | 326.357036514613 | 335.569876624791 | 345.294930735691  |
|         | 295.312692092025 | 470.231929311877 | 358.779372054826 | 356.3185171117856 |
| DHRS4L2 | 76.1417635449123 | 85.8945498067934 | 129.609377870182 |                   |
|         | 117.228320608065 | 66.1650385535549 | 98.9560329133205 | 128.635811501506  |
|         | 105.414552529943 | 129.252597914828 | 86.500678864429  | 89.4747568145717  |
|         | 115.622641633992 |                  |                  |                   |
| DHRS7   | 423.608694638779 | 537.841677481011 | 491.8684831079   | 570.204236909398  |
|         | 264.263104842911 | 365.459728613746 | 376.141477833569 | 382.538365722661  |
|         | 284.351747562807 | 343.990395610093 | 476.421959423835 | 577.993850127555  |

|        |                  |                  |                  |                  |
|--------|------------------|------------------|------------------|------------------|
| DHRS7B | 141.79653024085  | 123.433224929087 | 130.10148014895  |                  |
|        | 103.961956810572 | 126.79509061532  | 109.468741823602 | 120.96329303892  |
|        | 93.3718038663074 | 105.71315237465  | 133.43526498879  | 125.891602778425 |
|        | 149.515611848932 |                  |                  |                  |
| DHRS8  | 47.0940613507321 | 45.7317208802318 | 47.7737810047679 | 47.481302504066  |
|        | 42.6022652963326 | 40.9506062495231 | 48.9826868640753 | 45.7476095696859 |
|        | 48.0163377492228 | 46.325232414659  | 37.8372168909583 | 48.1627097465883 |
| DHRS9  | 142.840631375936 | 56.2508140932179 | 57.6801614250432 | 123.04622719856  |
|        | 39.512606833112  | 76.0532592222027 | 41.1742244762318 | 55.6282425338897 |
|        | 44.298892175909  | 47.0474493061198 | 39.0550139257658 | 43.0322714179517 |
| DHRSX  | 71.0340758556049 | 64.0096843640535 | 47.0940613507321 | 54.8412943008635 |
|        | 46.8674366115656 | 67.4846787600629 | 58.2315917325629 | 67.0904616289706 |
|        | 57.9713749600418 | 62.8201270538435 | 61.6702707724448 | 48.8670821164567 |
| DHTKD1 | 54.1745577382276 | 50.8114699212931 | 57.0427273538849 |                  |
|        | 45.7397504535169 | 66.7426485694967 | 49.1013967533186 | 73.0433648756396 |
|        | 58.3046521633424 | 77.9978216366573 | 49.7259371799014 | 52.5930185400362 |
|        | 57.0524725494273 |                  |                  |                  |
| DHX15  | 461.394007153992 | 854.712488657987 | 671.959673037066 | 569.377890112069 |
|        | 792.022171185649 | 570.824732318332 | 613.50943414129  | 459.182372959714 |
|        | 723.531909526537 | 618.892379887961 | 478.682734715193 | 784.268074988084 |
| DHX16  | 412.694325761831 | 390.834121304799 | 385.512974999198 | 244.435346243998 |
|        | 498.284928805673 | 301.867441371793 | 415.251775687794 | 315.163147652199 |
|        | 320.391231952436 | 325.275883498219 | 330.096171705212 | 305.735573572576 |
| DHX29  | 216.247225354243 | 233.72882333861  | 221.972553229362 | 191.182530250155 |
|        | 207.943044411392 | 263.67173636178  | 124.687212034276 | 185.874151272261 |
|        | 223.749512763927 | 208.553134986809 | 271.50380898418  | 269.745248423773 |
| DHX30  | 134.646159826262 | 186.301404367238 | 171.920449949522 | 122.284299477218 |
|        | 260.062749979574 | 170.390108862804 | 289.17237603899  | 176.363810387584 |
|        | 181.064239330482 | 167.410607476565 | 233.72882333861  | 145.791398829369 |
| DHX32  | 312.40869171788  | 219.134220280612 | 215.15351875081  | 186.64040927334  |
|        | 321.359569119182 | 223.801865347687 | 325.450452751375 | 257.80636663638  |
|        | 221.910075604221 | 274.02972772427  | 246.820301517765 | 327.948814478441 |
| DHX33  | 152.86270446968  | 130.121040883877 | 197.205643078662 | 107.637618676176 |
|        | 237.039707901886 | 126.128760255542 | 186.759757179509 | 140.288771064502 |
|        | 123.817018264773 | 186.965367827758 | 159.827302305842 | 134.567947469561 |
| DHX34  | 80.2070411865083 | 71.7533140056576 | 77.7907484334847 | 58.106070377898  |
|        | 92.7836745985234 | 55.0618818132967 | 68.2708120569221 | 68.5328071841649 |
|        | 68.4720753153522 | 65.813547096222  | 56.6086202928268 | 58.7157078555305 |
| DHX35  | 89.8567957512307 | 77.9992448636936 | 69.4967762263181 | 63.9570596163747 |
|        | 94.1575209300592 | 82.1974756449763 | 99.7529382840954 | 96.0654949568324 |
|        | 80.6434122355417 | 89.1516394894484 | 85.5839487225537 | 85.9286114777649 |
| DHX36  | 128.436305192918 | 125.383837024985 | 87.2316853416374 | 119.747995520476 |
|        | 172.192366002756 | 107.576033955049 | 120.465621774337 | 119.965950077259 |
|        | 128.923092916744 | 91.6713614282714 | 109.144663527001 | 117.520762118299 |
| DHX37  | 120.630151942485 | 129.190555260332 | 105.052418151358 | 105.790224260281 |
|        | 130.936053902005 | 90.2227706363325 | 142.789889238338 | 115.482982633699 |
|        | 156.738940207775 | 113.008760911729 | 138.070735985503 | 99.5531381996521 |
| DHX38  | 91.0346886951891 | 118.752208441493 | 154.248946683126 | 108.025082988807 |
|        | 91.6253858792439 | 119.015431849218 | 107.610858427836 | 107.844799332742 |
|        | 110.517563101892 | 95.2490714726663 | 100.234661597218 | 92.084526929319  |
| DHX40  | 93.2133061608764 | 92.7427427543974 | 103.808640431626 | 69.1931891474114 |
|        | 91.2107065307656 | 99.8323169037315 | 120.825113658705 | 97.7415824971555 |
|        | 135.226924329183 | 79.9335381350929 | 82.4005336009159 | 91.2107065307656 |

|        |                  |                  |                  |                  |
|--------|------------------|------------------|------------------|------------------|
| DHX57  | 45.5342598239058 | 45.0905928998779 | 49.3780606970538 | 43.4933087941017 |
|        | 53.6334631215581 | 43.6960408897486 | 52.9531187309739 | 47.0540401406168 |
|        | 49.0593794153708 | 43.5599890586394 | 49.5551703887595 | 51.5437850416773 |
| DHX58  | 64.2690842803282 | 113.491158368594 | 117.228320608065 | 103.349712762251 |
|        | 64.193536444915  | 80.2112932898502 | 86.5564881117807 | 94.2678678253657 |
|        | 93.7090094630558 | 111.056599389048 | 102.027922691582 | 73.1447139654971 |
| DHX8   | 70.083473392272  | 69.640968387662  | 62.4683876804812 | 56.0794100106654 |
|        | 75.8306078651291 | 65.4643755537228 | 81.9504925867759 | 88.4439480366515 |
|        | 85.5711312226989 | 79.0249585610565 | 71.8314470868658 | 62.6868461044048 |
| DHX9   | 71.4937262725923 | 82.3344892042646 | 82.1974756449763 | 67.9728793995736 |
|        | 94.2275161759277 | 85.3086977427271 | 91.9291200887492 | 64.9191509252662 |
|        | 85.9596109950132 | 51.7343702554597 | 60.7516146716018 | 68.4278345554565 |
| DIABLO | 489.983164420779 | 337.363827785838 | 387.867128019374 |                  |
|        | 323.576613035353 | 365.860501246879 | 314.856937113103 | 517.664764759512 |
|        | 477.924466983414 | 541.631969808467 | 478.799250340246 | 412.880824530845 |
|        | 330.096171705212 |                  |                  |                  |
| DIAPH1 | 269.546586017659 | 182.80711310964  | 244.837105178705 |                  |
|        | 322.774093041134 | 219.073357087203 | 195.403882457038 | 252.280105035425 |
|        | 280.680953068339 | 303.139550962377 | 259.456935785521 | 229.47693624489  |
|        | 216.821078573868 |                  |                  |                  |
| DIAPH2 | 61.0468099710416 | 62.6984594468418 | 73.3448790478335 |                  |
|        | 78.4289643729837 | 71.6537776654915 | 94.0140258999054 | 76.0041771381018 |
|        | 101.560929859785 | 75.7427148831879 | 102.136265168978 | 98.0473811574767 |
|        | 95.5325488969517 |                  |                  |                  |
| DIAPH3 | 45.6001828766679 | 51.7983110178095 | 47.9635720235482 |                  |
|        | 43.2504382247503 | 54.8609068340124 | 42.0106197763828 | 58.6431245059655 |
|        | 64.0227655842024 | 56.7429967489965 | 41.8613406887824 | 39.0950295411867 |
|        | 44.7937332169644 |                  |                  |                  |
| DICER1 | 83.5069968129733 | 88.4036642243438 | 123.281175151414 |                  |
|        | 104.103899614521 | 135.644934816665 | 121.487591828005 | 84.4596873416863 |
|        | 67.9778438150245 | 95.7639712596394 | 71.5948944013406 | 81.4061378176246 |
|        | 85.7208881534518 |                  |                  |                  |
| DIDO1  | 62.0967404944031 | 71.3015974749703 | 90.0552783827917 | 63.4531374125233 |
|        | 97.9305595485282 | 70.5025097213784 | 71.5836731059913 | 59.7744650739434 |
|        | 59.8400088701028 | 71.1607965028029 | 73.5161632100822 | 65.8332717237037 |
| DIMT1L | 286.996922972683 | 327.786619565391 | 339.980317745427 |                  |
|        | 260.383969219887 | 373.914455300185 | 369.032450063274 | 209.068725760522 |
|        | 236.565670642447 | 329.557502151159 | 368.005081137665 | 320.452418537108 |
|        | 445.307046237791 |                  |                  |                  |
| DIO1   | 39.3303857231606 | 38.5808034535515 | 39.2707964550441 | 36.5099686711015 |
|        | 37.9058271053655 | 39.8455060654531 | 40.2512356243714 | 41.4123755032424 |
|        | 38.9006788676407 | 37.7497202946736 | 38.5668610487033 | 39.6938066205531 |
| DIO2   | 148.403272698474 | 42.0709558258414 | 39.0775870687758 | 59.3618843678775 |
|        | 51.7495306734657 | 72.2544131004774 | 36.8369172900902 | 77.1707015554489 |
|        | 48.7646976789783 | 37.6383530120621 | 43.8002456102021 | 44.4067063477243 |
| DIO3   | 52.2236479204029 | 40.3384318592985 | 43.401782064778  | 34.1051821768421 |
|        | 41.8806343997257 | 55.9351706773613 | 39.7576136507593 | 46.2779564481158 |
|        | 39.1790517315259 | 45.9004543328976 | 61.0979269700412 | 47.3172462673426 |
| DIP2A  | 47.420942961753  | 53.7820518773759 | 82.6036671634626 | 50.7855742231932 |
|        | 65.1271567764953 | 51.4931742685391 | 50.1027491117756 | 50.2391482329046 |
|        | 55.8046062733709 | 54.0917531668054 | 51.5612024992699 | 51.7382401683029 |
| DIP2B  | 263.706801812277 | 197.515728627482 | 215.831300220615 | 326.250872625748 |
|        | 155.01005229951  | 151.225738885272 | 194.703024752864 | 253.072560237983 |
|        | 284.942182200489 | 192.41551362197  | 170.932645135423 | 164.780216383719 |

DIP2C 130.848965290163 75.9802606133139 66.737740728688 66.7750249658122  
71.1607965028029 169.554408876006 101.065203693106 94.7718338968252  
70.4933405598359 118.027323513177 146.087016079575 110.223625398261  
DIRAS1 41.8409927585705 36.6968906669565 38.0452862258803  
38.745552403895 36.2048942610546 31.2812535042976 36.197424053556  
48.1591264215184 29.9775071862804 37.7315666632629 36.2435874904689  
39.8497227447888  
DIRAS2 40.2087556903277 42.9020321355927 38.941855825269  
38.6414316877471 39.0564222526273 41.0012755104374 64.8367546135053  
40.6171774724171 43.8106375505041 39.0266821712099 39.6833800000587  
40.3691324547049  
DIRAS3 49.2595762436995 39.1982470626863 43.4544762830742  
47.8164193292842 43.3332476888305 47.2505395290129 46.8613212048981  
44.8727287473605 39.9777866059804 43.6670755115848 44.7752571196612  
38.9834959368496  
DIRC1 37.6397652536077 38.5252456306656 38.1421709520616 38.5252456306656  
35.5220586859301 33.895835691032 45.1017494688414 43.7396619462033  
38.1169703906207 38.6454098044474 42.2618615571566 40.4639532172338  
DIRC2 234.727123301682 285.254985583609 226.785831708938 250.210134743225  
252.487015579489 128.559660070271 327.878405194732 365.860501246879  
185.360921731157 204.502683458676 212.576203581294 307.922754395377  
DIS3 45.8108990837624 50.0425298550559 55.2141529491512 42.9358255168086  
46.7508829977587 55.0009147092272 44.9863726205428 36.7460922671619  
49.7336769474446 48.1392888470269 49.2206713037152 54.0374522273907  
DIS3L 274.398580571984 266.129007472128 159.506157112627 217.39432336811  
364.962649416567 274.398580571984 367.158502379417 300.186402341399  
209.099378471892 376.931257615162 328.548716133094 253.841638589385  
DIS3L2 87.8746766762445 95.4942268742467 81.382229980722  
88.1494891612632 101.017461500409 77.7481370715949 109.339287213971  
105.308648028552 97.4062608315831 128.521748930472 149.536891697595  
96.6957892186886  
DISC1 39.2076937845359 43.9783383422823 43.8495248991589 43.3772464014781  
39.3999056968598 42.297291190584 42.4493032770053 42.6786833450085  
35.5220586859301 43.3405153487994 42.911855821602 40.9022255200169  
DISC2 42.7150227340364 40.5400384479766 39.3709357615493 39.5050383901884  
37.2567512265363 42.4580504587581 34.4570158133896 37.1317006162938  
37.6383530120621 42.1622837416589 36.2435874904689 39.5418280570561  
DISP1 65.0721641331632 56.5319193881205 61.841867306916 63.3006977162657  
43.5544347011646 131.319040057576 57.4047331041592 57.8765910878975  
56.3441077510744 116.441764463618 98.3322659713024 79.8331445290301  
DISP2 54.3554233228353 53.7332797903102 90.4765857081732 58.9168466928565  
44.2607789091176 42.2577689927563 36.5352572191451 40.5158867964016  
41.9635525160083 82.966263655525 89.2185019250322 41.7575097298927  
DIXDC1 57.2529265661628 53.6816179316072 60.9621846036092  
62.8201270538435 62.3990310986805 230.014127346507 46.4959793353184  
51.3472428383325 57.678188678075 88.8568707880669 100.413031488199  
83.5069968129733  
dJ222E13.2 72.1408243034509 65.485076402841 74.2122914028677  
47.481302504066 61.1216330559316 54.3478800757394 66.3209349903185  
67.8061298261394 60.0736861987141 53.4109882045447 65.342842101283  
54.720204938924  
dJ341D10.1 86.9816932158186 62.6984594468418 63.5107036952143  
135.436347750159 60.4122350478242 86.6246917308185 41.8315602975157

71.7336217321663 54.998510746958 51.6778366958973 61.4121672148248  
75.4053820110486  
DKC1 556.092573451208 734.143790759359 583.053232396803 393.556480397634  
1716.82239359769 564.468049419762 780.708896888794 952.16345035163  
775.931494648677 477.023373302787 575.268446033282 516.704027135707  
DKFZP434B0335 52.109723558511 61.7572675712557 65.2670315837785  
72.6824533717231 44.5668141895992 51.3886035574416 56.3376046940285  
73.362936710475 53.7442594289333 46.0119912782855 58.8961770381033  
54.4313108506244  
DKFZP434B061 39.4250105372135 42.1372626664516 40.4882741869718  
41.7614975630362 42.3536549114165 42.0016830644258 37.6502409810897  
39.8016018354453 39.7162631015511 42.4594149893798 42.7275315121163  
43.8336862998829  
DKFZp434E1119 33.9561816279577 36.89524015739 42.3536549114165  
43.3078542962968 35.4484652445078 43.0860383229288 36.634024014558  
44.5029690493211 38.2215591930186 38.528621456378 41.0808257270221  
37.6557714476853  
DKFZP434I0714 49.085741080241 37.1685072112618 47.0940613507321  
45.0798408927912 45.6895223823001 44.8872784170036 42.4939802311136  
37.5511560880902 47.798305839406 49.1928206164702 46.6442692119997  
41.863927676552  
DKFZp434I1020 42.9104454767916 42.4493032770053 41.9287023391451  
38.5252456306656 42.269054475455 39.6251842352088 48.1069139823064  
41.5464765641928 41.9083581529276 41.4397539024976 39.1878770155069  
41.2437378488025  
DKFZp434J1015 36.7356360093603 44.1239711172417 49.3780606970538  
46.0228732507872 48.3814421939888 46.263826584899 48.3411413510851  
42.5435283762933 41.074824727477 34.9138625012006 42.2618615571566  
49.904979214379  
DKFZp434K191 163.877163712385 111.333692153793 112.727277807495  
168.737634511775 134.981483569602 75.8976034525022 144.227861902786  
290.956194006554 133.074560812703 209.658186168638 238.205365476671  
166.834334710682  
DKFZP434L187 35.2267149016596 38.9338521051669 42.157627240486  
42.0102671859606 29.9775071862804 38.8336427948187 36.4098694708483  
40.6171774724171 41.9635525160083 42.3606390470387 38.3684202018524  
38.5279745308203  
DKFZp434M131 41.9407041937973 38.9534635879195 43.4544762830742  
42.0102671859606 43.683792219729 42.2114134935898 41.8799523546812  
41.9315419791594 47.417512242919 41.5435611403119 40.8225507267584  
43.1235886043549  
DKFZp434N035 52.8427643366617 57.7757446006652 48.2314980343598  
45.1151758109609 51.5165373796787 47.9503724044453 51.5229124652769  
45.8669209716694 53.8716214229685 48.5374448344297 44.9713479185144  
44.1063440402552  
DKFZP434P211 40.3478825593224 45.2556760873335 45.989212296035  
37.7469621225553 44.4489662507893 43.0860383229288 42.1607322031054  
46.2779564481158 41.074824727477 51.4454142248566 42.7275315121163  
47.5025821041537  
DKFZp451A211 33.4902421268456 36.0366673493555 41.528370959196  
43.3078542962968 43.1252272136667 46.4648868771662 40.2154497375715  
38.6454098044474 42.0621425894624 44.3648993568405 42.170702295259  
38.2350720635382

DKFZp451M2119 39.4710743516517 45.1694246393676 44.7829632472754  
40.0698728584484 34.7018263647985 43.5752393599169 40.2154497375715  
42.6450179841129 42.1594905198929 45.6868589181768 45.0589947942306  
47.2131144508464

DKFZP564C196 48.6621527194963 42.4493032770053 37.9482157381008  
39.7411455670172 46.3150221024046 41.554942319225 52.2476631126873  
42.2577689927563 41.2870505273664 42.6793753550854 48.3847843498476  
41.863927676552

DKFZP564J102 44.1294459089314 51.6869155634183 42.157627240486  
44.4367387274922 40.6723334103791 145.335751135441 73.3042538589134  
53.9465584609317 58.5561424827901 76.5375674421131 77.2834482217973  
61.5300817099814

DKFZp564N2472 40.9558083259517 37.6383530120621 46.2625470410195  
38.6414316877471 38.9496515344837 34.0777108441756 38.0598374201407  
38.1835938174625 42.8036731479932 42.3606390470387 42.5426057453993  
40.0557788909923

DKFZP564O0523 69.0975200641705 75.5775406974686 82.3344892042646  
56.2508140932179 67.4534389579576 68.7342341724306 51.0013344286851  
46.1673159982664 66.9499465764301 48.7414853386615 60.1466326805616  
57.8111054584154

DKFZP564O0823 458.47341225284 316.831358204198 102.053879707074  
215.131274710043 121.354667375673 513.891389190131 119.747995520476  
315.276749671783 81.4783226003925 738.364399569625 680.279119780451  
176.461729584652

DKFZP586H2123 66.4399491500833 97.6326743942878 75.5103237141193  
78.6344248102932 148.514056973195 468.153823329361 39.4600924554505  
216.45007990575 56.9621724830201 461.83420090894 304.298036741211  
135.323750661937

DKFZP586I1420 98.0864897427459 82.0897118579449 95.0738959950301  
81.588696805606 70.8749669449099 71.2168693013526 77.9493708990494  
92.3388129097482 119.572497267498 174.961427864327 127.1365842097  
114.623641209561

DKFZp667M2411 54.1745577382276 55.2893984191264 58.4137028673494  
54.1240583139871 50.6470461863549 57.1752846228778 66.1940959364976  
50.9933795450314 59.3580517977711 46.325232414659 43.844855336215  
51.0013344286851

DKFZP686C2281 45.4799270968969 37.4540772310118 33.1559412791294  
41.1886975241176 37.1565984182084 37.7000400506818 40.2154497375715  
39.4710743516517 34.9428206949566 37.4302011516587 34.3633615460307  
39.2469742642337

DKFZp686D0972 37.9387791625384 40.716553247236 39.9101908547397  
30.9241129241985 39.5595233162192 36.8059561571675 37.3799542961839  
35.4526946152955 36.197424053556 34.9138625012006 38.1835938174625  
37.0953622406687

DKFZP686E2158 46.6348258763289 50.2696827764943 50.3950981988762  
47.8164193292842 54.802736966312 42.157627240486 37.7136011474903  
41.4508241771315 53.838484549134 46.325232414659 48.1352470945488  
50.0571060701893

DKFZp686E2433 42.3433931248155 47.4740726032707 46.4569566520107  
56.6458456890715 38.3561682218911 42.157627240486 37.3799542961839  
42.6450179841129 44.4395580493118 43.7303813515864 41.3553369544097  
44.5432192783161

DKFZp686I15217 70.9419509323007 51.4288869214337 61.7502624458447  
58.4476706144086 56.9360840563854 56.3525213736952 47.209353240759



50.5070012045444 71.2963721541702 54.4190527512508 56.0477607422828  
54.8630527326985  
DKFZp686J0529 40.0945258957481 39.4569929845912 39.991353369336  
36.2202703635318 39.4092846492473 37.7441423440745 41.6520912742594  
38.0268447621448 41.2437378488025 39.6205203043973 36.9060997041453  
41.9820792173615  
DKFZp686K1684 47.5647821785529 47.1332119496722 50.1860191642359  
53.593974682612 45.5809132232681 45.1873487463472 47.8947595316832  
52.9813204449021 47.4699236780425 41.6373771565199 46.824299585607  
47.3992733452821  
DKFZp686O1327 40.4639532172338 40.5400384479766 43.0016969050339  
41.5464765641928 47.2074332636566 40.4359177791566 42.2577689927563  
37.9837233601316 40.8970401536578 45.2556760873335 39.8184668132023  
38.5279745308203  
DKFZp686O24166 54.2648201582657 49.1283590719461 52.2132783757422  
200.036360605006 82.0149542477384 59.8102324370568 58.8993834673475  
61.5000955267432 58.6431245059655 56.685925255591 65.9273663561152  
58.6481644777552  
DKFZp761E198 42.442231667357 72.6888636455541 42.0621425894624  
72.0694688774804 48.5000946421718 48.260931742163 71.0369238830779  
60.7942162859036 51.3511088648386 45.2556760873335 50.6473771879221  
55.2449003905956  
DKFZp761O2018 43.4626049853157 42.3550738181144 42.7303139017786  
45.1944222548351 45.4751076037511 41.4508241771315 43.3262148375525  
39.9576138799997 43.2761454096265 46.325232414659 40.4504608195666  
46.8129509799753  
DKFZp761P0423 218.999184133546 128.256151920468 149.397632479523  
176.492987902471 77.7140342228764 70.2553917409773 174.007271403635  
142.846665249354 107.309776354951 113.26670675749 123.368987753537  
114.488672372067  
DKFZp779B1634 47.0940613507321 43.9421822132391 45.310660704531  
38.9534635879195 53.8260140375214 46.1513019317765 44.4639405506967  
41.1575777497576 41.2870505273664 40.4136535208406 38.1835938174625  
40.7704587752083  
DKFZP781G0119 34.9138625012006 37.10170285405 41.528370959196  
39.3750969348308 40.4166536885831 38.9661430990729 43.2721716572958  
42.4580504587581 39.9444191873552 41.6724739851995 38.6662194645633  
36.7762265039864  
DKFZp781N1041 42.7150227340364 44.2105195734073 47.7737810047679  
42.6913548400127 39.4693871570028 47.0940613507321 44.4639405506967  
43.7396619462033 50.1603795873336 45.5776159432079 45.0589947942306  
43.8575940017119  
DKK1 40.308802735799 51.6527806785838 81.6486527718661 58.1798515131249  
174.537032518715 74.7669841575348 49.3067361345568 181.983177572371  
91.4121563150184 80.2381651206227 143.215491185309 77.6056319020116  
DKK2 49.1868644496737 40.4772513262052 43.8495248991589 47.8947595316832  
41.0476065156912 36.6271061451613 40.2154497375715 39.853866204927  
44.6717213146407 42.6366765186182 37.6921755067309 41.5132248356707  
DKK3 274.02972772427 210.73006676203 161.500218853268 152.996027678733  
254.519518210024 120.705229050133 86.6023527423111 178.422506138888  
83.7019398654324 262.37779288036 146.389547177092 123.387418707738  
DKK4 42.442231667357 58.5406981871153 58.0218262176065 40.5484717678957  
47.4548471240051 48.260931742163 92.8579489575841 40.5158867964016  
281.262083731954 56.5379973844443 49.5923712603197 58.3586374083245

|        |                  |                  |                  |                  |
|--------|------------------|------------------|------------------|------------------|
| DKKL1  | 43.1805016690297 | 44.7829632472754 | 41.8751578329365 | 42.2496337895968 |
|        | 49.0828761839116 | 42.0574848021044 | 44.3440839686558 | 49.3880946790306 |
|        | 47.6195009345747 | 45.9004543328976 | 40.9157352260901 | 45.1735152121056 |
| DLAT   | 104.462230406058 | 140.128033028434 | 134.394743648475 | 111.347228208501 |
|        | 144.139555313429 | 119.647202975116 | 129.810477623628 | 107.232979387172 |
|        | 110.074666148474 | 88.9738853594498 | 97.2004257862686 | 152.200107222761 |
| DLC1   | 48.1952521496489 | 45.4143854024453 | 51.223859150798  | 64.0395697320109 |
|        | 77.1287755867582 | 61.4944752562671 | 37.9946685306274 | 70.0133734659853 |
|        | 39.3506426665347 | 346.116601612353 | 264.071486075874 | 109.649431670339 |
| DLD    | 98.4084364053686 | 136.377736482671 | 133.576489624155 | 137.955007835039 |
|        | 134.394743648475 | 137.286091889421 | 82.9431583622036 | 107.971806573919 |
|        | 179.158053533144 | 88.7461361855771 | 105.589475270494 | 174.985336606027 |
| DLEC1  | 36.6962082197711 | 41.7656868106485 | 40.4882741869718 | 42.0636939252645 |
|        | 46.4775637378703 | 39.132725377815  | 38.1154766911051 | 41.3506832276112 |
|        | 39.9444191873552 | 39.5317722761104 | 39.9519547348106 | 38.2013340576059 |
| DLEU1  | 45.3872406432794 | 50.9099078696349 | 50.0487097583953 | 44.4367387274922 |
|        | 74.2653431904071 | 50.8930565655395 | 49.9032148112001 | 43.4544762830742 |
|        | 57.1401776589964 | 52.7972156492746 | 48.4928863469279 | 64.9418945936106 |
| DLEU2  | 44.7520317855773 | 64.408176016319  | 54.2670850492947 | 46.3203995372658 |
|        | 62.4624150544853 | 44.4619248757502 | 57.4622430729629 | 43.1567024035183 |
|        | 47.417512242919  | 41.3321861371202 | 42.6776449468246 | 43.7672102682067 |
| DLEU2L | 38.2083710281545 | 44.7829632472754 | 38.4043916290561 |                  |
|        | 41.3027031037343 | 41.467005949568  | 38.5252456306656 | 41.1507980856436 |
|        | 46.5717043290731 | 39.0775870687758 | 43.2988017098387 | 35.6970528713709 |
|        | 38.3291713594599 |                  |                  |                  |
| DLEU7  | 39.6609238036815 | 39.1982470626863 | 40.5734458834617 | 43.3078542962968 |
|        | 41.0885562160946 | 38.2293008890613 | 36.7356360093603 | 39.5466975353131 |
|        | 39.0775870687758 | 38.957687788868  | 43.3085358214154 | 34.1509644696334 |
| DLG1   | 34.9138625012006 | 38.5252456306656 | 33.7737772393677 | 42.2496337895968 |
|        | 37.4470183315826 | 39.4953494583071 | 38.4005795891396 | 35.6825474397235 |
|        | 33.5578650644246 | 36.0481934423077 | 42.8263096141654 | 36.449101775775  |
| DLG2   | 43.2135791259317 | 44.8529259387308 | 38.4456289125816 | 44.7401523707775 |
|        | 42.6022652963326 | 61.3309323244567 | 37.4386615664066 | 42.8936990772838 |
|        | 55.1023658447049 | 85.0653700751969 | 63.4610447573417 | 54.4992295592001 |
| DLG3   | 50.5165823866945 | 62.3439114913889 | 51.8122261766744 | 38.5855564939014 |
|        | 46.4775637378703 | 51.9885249508283 | 73.3881007284998 | 58.6010484516703 |
|        | 61.5080959417997 | 48.1392888470269 | 50.6473771879221 | 48.4535991392809 |
| DLG4   | 110.88526946931  | 55.3477556906605 | 90.1284518302601 | 79.5838979704243 |
|        | 84.7782034884529 | 81.9983163893373 | 57.51482768194   | 83.2873728545705 |
|        | 87.8724689898823 | 75.0665411373616 | 111.186223357396 | 96.9944911507111 |
| DLG5   | 32.742439449766  | 39.0894172982439 | 46.3411353377615 | 36.4564050256915 |
|        | 39.0564222526273 | 41.8613406887824 | 38.8417151851134 | 37.33030683349   |
|        | 46.6944238390932 | 41.8613406887824 | 42.8263096141654 | 49.0655215909632 |
| DLG7   | 76.1417635449123 | 97.3813557754832 | 67.895735332714  | 45.1944222548351 |
|        | 108.607805039005 | 40.244271403831  | 83.8811735017279 | 117.074650076861 |
|        | 123.933814581281 | 37.6383530120621 | 32.6463318577756 | 37.6557714476853 |
| DLGAP1 | 41.0608773166058 | 40.931294690669  | 38.5045333213784 |                  |
|        | 40.1804147506786 | 41.3277288245157 | 41.7256940298128 | 39.8695929627783 |
|        | 35.5179217192467 | 37.5723609429239 | 39.2623423164488 | 36.43924066428   |
|        | 39.1878770155069 |                  |                  |                  |
| DLGAP2 | 50.5670783769975 | 59.7098454699348 | 48.8941062980393 |                  |
|        | 62.6048727240291 | 47.6884372645373 | 51.3886035574416 | 56.4809146784765 |
|        | 51.7538628098347 | 61.0094935318105 | 54.1683282066029 | 57.4078217542368 |
|        | 57.1441484662045 |                  |                  |                  |

|        |                  |                  |                  |                  |
|--------|------------------|------------------|------------------|------------------|
| DLGAP3 | 41.0608773166058 | 36.4002279956519 | 36.8730514568925 |                  |
|        | 36.1562979552173 | 37.4470183315826 | 48.3686935595826 | 43.5627649099623 |
|        | 40.3357777530419 | 39.853866204927  | 36.5806287103157 | 42.5426057453993 |
|        | 36.9976231206067 |                  |                  |                  |
| DLGAP4 | 128.766242896259 | 91.7629175712824 | 88.2959958615748 |                  |
|        | 91.6033269431304 | 82.1344514651393 | 134.581057139589 | 140.866324039667 |
|        | 109.398472684587 | 86.033725825968  | 133.798096986107 | 123.586057618734 |
|        | 92.9043863423147 |                  |                  |                  |
| DLK1   | 41.9407041937973 | 36.9994058279362 | 43.8495248991589 | 41.9620007529243 |
|        | 49.8304479381623 | 58.3627863274274 | 39.4916414839923 | 43.9604529016594 |
|        | 36.3649677956953 | 39.8455060654531 | 40.5824352835642 | 40.3316153483289 |
| DLK2   | 41.8409927585705 | 41.5996102310128 | 45.1798080655905 | 38.9074189954657 |
|        | 56.2937283136959 | 41.554942319225  | 42.7431359850339 | 39.5215827396813 |
|        | 59.7483827511172 | 42.3413611855132 | 40.8746128314437 | 41.1066323911308 |
| DLL1   | 154.847446197442 | 247.511892014861 | 106.912316023598 | 123.608921653229 |
|        | 132.555169949054 | 139.121494956408 | 65.524821699432  | 154.707548614663 |
|        | 42.357910063876  | 121.236881661832 | 158.334581991361 | 132.508880040274 |
| DLL3   | 42.6575535390785 | 42.2900457798748 | 38.0958223740111 | 41.8778873678551 |
|        | 48.5666902992029 | 36.2768299545794 | 37.2316700720288 | 118.736188485344 |
|        | 36.3352882516399 | 39.3698811593364 | 37.3687900733549 | 39.2469742642337 |
| DLL4   | 44.5282181324797 | 40.716553247236  | 56.4779645313958 | 39.2780515621926 |
|        | 48.9627346956003 | 39.7394181011603 | 41.1507980856436 | 42.357910063876  |
|        | 41.1742244762318 | 44.1379638573455 | 43.4709415392696 | 43.2776458914333 |
| DLST   | 238.893145911331 | 141.611097024526 | 220.054040993848 | 207.540972220982 |
|        | 169.061093538895 | 207.726011653345 | 249.995119246929 | 170.932645135423 |
|        | 215.800662077432 | 264.548218296413 | 297.187417426993 | 287.423909789368 |
| DLX1   | 41.2773842727759 | 49.4493009852254 | 41.528370959196  | 42.6222445667107 |
|        | 40.5710637884029 | 40.2945586900975 | 40.4967168818294 | 42.6913548400127 |
|        | 45.0017158586743 | 40.7620472083159 | 42.4162492820012 | 43.2177497174408 |
| DLX2   | 36.6480005877129 | 37.7384958256497 | 35.8265993915844 | 44.7980740332174 |
|        | 40.6723334103791 | 41.3553369544097 | 39.5496902678788 | 39.3709357615493 |
|        | 40.4220196471124 | 40.8049408996274 | 37.1059647239814 | 42.0424641526302 |
| DLX3   | 66.2154717217675 | 43.4396866157171 | 51.5292723244077 | 49.3654837541353 |
|        | 56.8307116636372 | 35.314469458379  | 34.6720534245631 | 81.8491450876942 |
|        | 38.5252456306656 | 58.115198353247  | 56.8436081694537 | 45.6692241948108 |
| DLX4   | 44.1834366106487 | 43.4681646416585 | 41.0356368374708 | 40.4359177791566 |
|        | 39.5111866657136 | 42.2577689927563 | 43.3910673889849 | 40.7752992161136 |
|        | 40.6533975461148 | 44.7463386786906 | 42.4098506918871 | 44.5029690493211 |
| DLX5   | 51.413025495745  | 358.30596676183  | 166.608353896248 | 43.5627649099623 |
|        | 191.298525555624 | 53.4466111440611 | 209.467874193952 | 195.168348967505 |
|        | 152.054785478928 | 129.434864701718 | 77.3999378505514 | 40.9683275553869 |
| DLX6   | 39.6609238036815 | 41.8848959280916 | 43.9450023643394 | 44.9370339275041 |
|        | 38.745552403895  | 43.4681646416585 | 42.8684958525042 | 41.0381860307445 |
|        | 45.7452456977857 | 44.2580151149956 | 40.4504608195666 | 35.5523662009011 |
| DMAP1  | 227.474113475825 | 207.0155359394   | 200.615897175992 | 165.121380058529 |
|        | 209.497482517298 | 191.361705136492 | 305.554059609771 | 250.866560791828 |
|        | 268.144525192544 | 313.115027781064 | 293.410413883219 | 175.985530451862 |
| DMBT1  | 209.967057706137 | 45.7576020206129 | 44.5134109184888 | 47.3574589211166 |
|        | 45.4751076037511 | 45.9980734733005 | 63.2726414544553 | 63.8008894786105 |
|        | 62.5327652825303 | 54.3163440690038 | 58.7389869173495 | 285.053017606956 |
| DMBX1  | 51.5033727579864 | 54.7083331985678 | 42.7303139017786 | 44.4367387274922 |
|        | 69.805066579191  | 37.9003288112261 | 45.8980298854198 | 53.838484549134  |
|        | 101.681822254799 | 47.1001757441025 | 42.170702295259  | 49.1200355938198 |

|        |                  |                  |                  |                  |
|--------|------------------|------------------|------------------|------------------|
| DMC1   | 796.359355922952 | 448.787414220553 | 523.25106120389  | 855.602941621804 |
|        | 364.439669236186 | 337.736535374405 | 695.684209526222 | 1459.69929955338 |
|        | 391.397318564183 | 1211.8832855325  | 940.781370938596 | 790.786577596971 |
| DMD    | 44.2807847072108 | 44.3529919625344 | 46.0238646636779 | 43.4721084347804 |
|        | 47.5057905459278 | 50.5868854091439 | 43.8594026120797 | 48.5989831621201 |
|        | 43.8012040086323 | 47.5595864930347 | 48.0987228351168 | 52.6275131390249 |
| DMGDH  | 37.2474303302343 | 41.6069493017095 | 42.3887531663733 | 43.7410507935043 |
|        | 43.4885245598939 | 44.1350486752012 | 42.8684958525042 | 41.4812544772644 |
|        | 39.1790517315259 | 43.401782064778  | 44.1533327883807 | 40.9683275553869 |
| DMKN   | 178.323615832679 | 260.383969219887 | 56.8595344107711 | 49.0816063338953 |
|        | 320.038347979923 | 86.5616422570166 | 413.31638457585  | 255.559793355361 |
|        | 87.6726059613969 | 233.435884567494 | 234.495626550751 | 205.772128732705 |
| DMP1   | 38.5332184743306 | 42.8542642792862 | 41.528370959196  | 39.2336402665402 |
|        | 43.7783560914188 | 40.244271403831  | 39.9519547348106 | 41.8767957887205 |
|        | 43.2761454096265 | 38.8173773425835 | 38.7337086062875 | 39.0536056496869 |
| DMPK   | 54.8153573978511 | 56.8373628733077 | 67.40251451399   | 46.3919862398545 |
|        | 62.2354226918761 | 109.029196594263 | 44.0137388752186 | 54.3820590274321 |
|        | 51.9545473262296 | 79.262977183608  | 75.854888525664  | 62.3102413989199 |
| DMRT1  | 38.6454098044474 | 33.939263369489  | 35.9305494063137 | 40.646702696033  |
|        | 37.1565984182084 | 43.5752393599169 | 42.0605906240248 | 33.9687743313429 |
|        | 44.8003345643334 | 39.9948390976317 | 35.860430241131  | 32.3796054199032 |
| DMRT2  | 42.9104454767916 | 81.2182827624857 | 41.6079958749402 | 43.3078542962968 |
|        | 41.6806984441849 | 42.750861693377  | 52.8496345990125 | 44.4031868028216 |
|        | 50.0526763693329 | 40.6533975461148 | 40.723990462047  | 39.4916414839923 |
| DMRT3  | 44.436995101921  | 34.8137085420423 | 44.0451487108213 | 36.264823544143  |
|        | 38.4540849632254 | 40.4359177791566 | 41.0381860307445 | 54.8412943008635 |
|        | 43.8482802038826 | 39.2623423164488 | 39.0550139257658 | 38.745552403895  |
| DMRTA1 | 42.442231667357  | 44.0409178714232 | 44.4311655729487 |                  |
|        | 41.1886975241176 | 43.6587492470348 | 42.157627240486  | 38.0598374201407 |
|        | 38.2782436497441 | 46.0106098064475 | 44.2580151149956 | 52.1788489555942 |
|        | 43.6753843488695 |                  |                  |                  |
| DMRTA2 | 38.8561375693335 | 44.3529919625344 | 37.6557714476853 |                  |
|        | 43.8002456102021 | 64.9072331703985 | 40.7616966228404 | 55.4004611309636 |
|        | 37.7612949798895 | 61.8445915808329 | 44.1379638573455 | 41.2598458726002 |
|        | 42.4607795638552 |                  |                  |                  |
| DMRTB1 | 39.0620487644635 | 39.7835513496873 | 38.1421709520616 |                  |
|        | 38.8495095797881 | 43.4544762830742 | 41.554942319225  | 37.6036146841933 |
|        | 43.5544347011646 | 37.6383530120621 | 39.7835513496873 | 37.6484782516569 |
|        | 37.6557714476853 |                  |                  |                  |
| DMRTC2 | 38.5007204246293 | 36.4002279956519 | 37.8386378737561 |                  |
|        | 33.3231576795423 | 34.7018263647985 | 27.4352294118391 | 37.6036146841933 |
|        | 35.9023742468744 | 41.863927676552  | 34.5718473203083 | 38.8507804383261 |
|        | 37.7526485343328 |                  |                  |                  |
| DMTF1  | 139.855023065402 | 124.214669663291 | 124.992776922316 | 121.510087314197 |
|        | 123.114162330406 | 133.930007857002 | 97.1759226403408 | 147.704325041249 |
|        | 119.634256037186 | 172.506486240017 | 154.612425659555 | 168.640033281185 |
| DMWD   | 111.522812019895 | 108.019575675653 | 87.2316853416374 | 40.5484717678957 |
|        | 124.051109959228 | 71.9329028989527 | 56.9320717885002 | 67.5206810636627 |
|        | 76.8864157610323 | 82.475816811779  | 86.915098846441  | 69.1099722732115 |
| DMXL1  | 38.5007204246293 | 38.3322849790657 | 42.5406888281114 | 35.9521941716188 |
|        | 36.5393857306744 | 35.8227939208521 | 35.4623691645629 | 43.3262148375525 |
|        | 36.197424053556  | 42.5664883002833 | 50.7903824729818 | 42.4607795638552 |

DMXL2 64.4415447415281 74.6847594297153 66.9239565096247 178.675242612997  
79.3889841821749 73.3506594385504 75.4053820110486 58.9081750508316  
64.9030399249327 46.0119912782855 51.7538628098347 54.720204938924  
DNA2 63.1291723738553 57.5941849631773 60.726977722583 56.2508140932179  
64.6374507338031 51.6558970571712 71.4414688202373 70.1211450522292  
104.725576313447 57.7805922926828 53.6895401581575 54.7727101923179  
DNAH1 44.7915315085948 55.6323803479191 56.4779645313958 63.6334154351075  
62.588825192561 46.6872654833579 45.1017494688414 56.2441895183416  
40.4997186069494 65.2361525412756 66.4251023257203 57.934622029119  
DNAH10 47.691150920844 43.1358833499227 42.8768096578102  
44.550322123994 44.6160092538827 46.1859571883455 43.3889851892323  
40.8793215723066 42.9020321355927 43.3438593008468 44.0409178714232  
45.2189250687483  
DNAH11 44.0328992213727 40.8880530359822 29.8304689114955  
35.3829784221072 37.956732373465 31.9222834447339 34.5633623842083  
37.33030683349 37.9273653326866 32.5178504369282 36.2435874904689  
36.5474283500601  
DNAH12L 45.4799270968969 41.159706131351 39.1799070031819  
43.8002456102021 38.5512429290626 36.6271061451613 36.197424053556  
46.695848687694 38.9834959368496 44.3648993568405 39.9070785037411  
40.6614700944853  
DNAH17 44.5282181324797 36.89524015739 39.6451483836089  
61.7502624458447 39.859345745831 43.0860383229288 46.9929836306816  
42.357910063876 42.2577689927563 45.6868589181768 45.9104478407175  
41.1554481567603  
DNAH2 41.8409927585705 40.716553247236 40.1985790927248 45.5869891570251  
134.258351436533 49.9699131196797 73.3042538589134 86.7710020879725  
53.6446045619513 53.0357938671646 55.4694986901287 57.5372732453319  
DNAH3 36.0144420013819 37.5469247328848 33.8558232866797 39.1706564265495  
40.7779767565889 40.1428591998404 35.3362091871364 40.7311497914871  
39.9444191873552 36.0481934423077 37.8372168909583 40.0557788909923  
DNAH5 51.5033727579864 48.1627097465883 45.1569741609597 38.9534635879195  
47.2074332636566 37.9951997351435 66.5422130374814 52.7787010032051  
47.1744296124496 38.745552403895 39.3667161654772 50.4847465816184  
DNAH7 53.1309801459151 50.543526404059 39.6451483836089 50.7046706880325  
44.7829632472754 44.3648993568405 52.561573697155 42.157627240486  
54.0192060888782 52.0999467564713 43.0971787292711 45.3763275588341  
DNAH8 45.3872406432794 41.554942319225 43.7630587657205 39.066284740632  
40.3452320167286 42.157627240486 39.4600924554505 38.6454098044474  
38.1169703906207 40.1179210534118 40.1742127891824 41.1554481567603  
DNAH9 40.6994262313917 38.8561375693335 39.4987030972173 40.646702696033  
41.0608773166058 37.8442841690502 39.3585350448719 40.6628537260412  
39.3442917208474 41.683412864532 39.2542963855807 42.5294887665766  
DNAHL1 38.2083710281545 35.0222940937513 37.5597671487621  
38.2041059863839 37.2567512265363 37.2686490268265 33.8558232866797  
39.4710743516517 40.0403898620771 35.3849221682845 37.7384958256497  
43.4709415392696  
DNAI1 46.263826584899 37.2810767789306 40.4070046183108 43.1847628331565  
42.269054475455 41.9543948167375 43.0930293831497 39.0620487644635  
43.9450023643394 45.6868589181768 53.1505787220552 45.3763275588341  
DNAI2 58.3702889417801 50.3586212130973 57.6371756925687 48.309866878365  
60.9710783023013 73.8105012820769 54.339958888486 53.7378346199838  
63.1944558106132 83.877343750194 60.7516146716018 69.6579723433329

DNAJA1 1541.9572099378 1638.16317738035 661.718946652592  
1578.32969650385 924.900902050757 1029.12917222294 1615.83220398811  
1362.12587130194 818.608913659251 589.395944599882 669.776067547468  
1106.57048989685

DNAJA2 471.59454368268 474.379113836506 665.510487460287  
389.583938820073 350.451704069255 533.820505121067 527.686970237622  
568.638529128128 461.500892766266 714.075528895169 603.224267841548  
668.584452504579

DNAJA3 371.393488010768 626.390544175817 764.571579067138  
250.866560791828 617.808073077341 416.40156274382 459.546279672649  
250.504350952583 667.837116137964 531.69595054137 602.047768767953  
551.915864019927

DNAJA4 319.722393409101 1359.9708539999 880.992328229414  
196.065114892186 626.390544175817 246.151211515664 197.040881690021  
244.070778149931 633.819901764391 643.9329225331 716.048536335117  
726.42773300581

DNAJB1 408.080620074472 333.566613571224 390.202312411165  
332.137622104526 451.13133250897 478.799250340246 261.6201598868  
205.378123452174 467.351570171652 359.296873000994 431.864508795316  
228.21982974423

DNAJB11 708.005870621064 619.337575854369 576.830397705584  
766.337559135016 1169.14891282789 513.266895252699 624.954583057431  
665.510487460287 754.700295017212 276.321098534247 308.64836180781  
515.216890329893

DNAJB12 64.863894209343 69.9431447778061 73.0855167819246  
78.59966540743 57.1010233600552 61.2387559102636 76.3583555666815  
56.3263223563484 112.131738588405 64.5232087947596 68.4261608261522  
57.8111054584154

DNAJB13 43.6706764143908 44.0409178714232 38.0452862258803  
44.9370339275041 46.6397391251762 40.4359177791566 39.0458123429605  
44.7044140979108 39.5806465938526 46.0119912782855 40.6373400186325  
38.6454098044474

DNAJB14 49.1217929709337 62.358854072801 58.3608287133675  
69.7610390623756 55.9715651431881 61.3149617644002 50.2626654591654  
53.8732900241064 56.2181240696479 50.4855887590421 57.2849292129038  
65.1251519077199

DNAJB2 573.394745674984 343.892794667047 294.966924715506  
264.855020003755 384.280434953152 266.702252514277 313.115027781064  
606.276674926567 398.139730642919 610.502562878788 596.84269596976  
396.93169345515

DNAJB4 44.1294459089314 41.8848959280916 43.3085358214154  
43.4410741327254 38.8456942580061 48.8744644207821 38.8775560911841  
41.9315419791594 38.1169703906207 41.9097689475185 44.9713479185144  
59.0457625163577

DNAJB5 50.5291432329798 44.3867827945599 44.5658219748173  
54.0332376648108 45.3675390992851 84.1195048659476 43.6753843488695  
51.0318873780319 47.3213303943727 78.4590546118913 67.8010199320754  
69.0503036666628

DNAJB6 416.717470974721 359.185856400148 299.890705180422  
353.751797948675 446.37035118289 508.081726674689 231.198764780818  
164.205608279417 439.770250139925 314.856937113103 296.598410253206  
445.875994521817

DNAJB7 36.4564050256915 46.8236022402545 40.4882741869718  
39.066284740632 40.7779767565889 38.6414316877471 42.2577689927563

43.5544347011646 39.2809305246091 41.9666541498638 39.4410515050885  
39.4490233720848  
DNAJB8 36.2496364442264 47.087835967892 47.0055981216687  
41.6564075217517 38.2496050953547 40.650742261428 44.7255207589606  
46.5717043290731 49.9951674107458 38.745552403895 43.401782064778  
48.0350549043063  
DNAJB9 117.934830767297 149.665486488005 129.2860308084  
564.929183025034 132.257197568848 227.206974078547 101.065203693106  
149.899176549323 130.313381811168 170.804822846738 149.629940171074  
198.522465152099  
DNAJC1 50.7390160399184 46.1569135229922 53.2046867327331  
52.3004056941891 41.0885562160946 59.0686629877982 44.4639405506967  
43.1567024035183 57.9713749600418 46.0119912782855 47.299647867533  
47.9566297250148  
DNAJC10 105.15507796881 123.455270940015 107.754432832706  
137.496822743899 127.701556328274 114.901312275861 102.457537266105  
164.462951076718 114.039396407323 94.233414682323 107.044681610056  
105.293665242737  
DNAJC11 60.7371790125714 83.1979076141836 68.4720753153522  
52.3004056941891 82.1344514651393 49.5424425850549 54.9765783642973  
78.6911549149983 64.830448408529 47.8207974930031 55.6972661824064  
55.9555622193202  
DNAJC12 57.2364979699541 40.9291911731327 38.9790184198145  
61.8445915808329 65.5618920437306 98.8719561245756 57.9583667603818  
46.4329203134841 107.538934056558 53.1124375923907 46.7386599624801  
55.8087097725119  
DNAJC13 129.336439341458 114.965999573704 145.847014515246  
155.287591646469 149.665486488005 161.180847265279 140.51841571801  
129.179537795204 118.488996952258 131.973056760893 111.874193363836  
136.883475451494  
DNAJC14 112.644426507762 126.389908470189 94.6935403697218  
94.5501397951415 87.0414124990547 82.8218647837178 100.756165194192  
130.673639258681 153.059039745191 96.2385885003071 107.391994714261  
110.302475164041  
DNAJC15 102.25509551881 103.883220270094 101.494432845825  
121.562769658314 62.046151104685 214.245832611737 137.547711779867  
72.9752827496503 163.299997237276 136.461760992832 120.046457114882  
207.540972220982  
DNAJC16 41.0608773166058 61.7572675712557 56.410923639913  
46.0228732507872 59.4830424460714 49.9699131196797 47.5963750520409  
51.3472428383325 52.0583273941813 44.1379638573455 49.6706535876636  
54.1090536870282  
DNAJC17 107.251974803232 74.3729155936862 65.8455652907556  
72.89602312859 73.6965494979349 66.1082848714279 84.0691608193405  
81.5582217750731 98.6825522152097 78.5141640924736 66.1229691315616  
83.1874704625702  
DNAJC18 53.3059058105836 48.109747794187 57.2107492415265  
54.2886483704949 45.8051846088552 71.7021670182761 49.2546642180676  
51.8347877274018 43.4656637536244 64.2174369755376 62.5036823572932  
60.2550788540864  
DNAJC19 80.3730667493235 88.4740208892504 76.450993090133  
80.0042268333735 106.009130381007 141.808284719109 84.607833108004  
90.2915974511786 85.5711312226989 83.946822476147 96.1307490576512  
106.70211644918

DNAJJC2 45.0985088502363 48.1627097465883 38.8775560911841  
41.3027031037343 39.2608760193011 41.6590564937735 43.0930293831497  
50.1833483241864 46.9739160257217 41.7405682794166 44.9713479185144  
40.4639532172338

DNAJJC21 55.2412344988347 56.8760943789568 54.5620104778414  
46.3203995372658 53.8260140375214 78.8741966117641 65.4561038762234  
77.8946473414547 60.2509851471485 58.0218262176065 56.6086202928268  
67.7965120293445

DNAJJC22 60.4593810615882 47.6229101519945 40.0998167098057  
56.9299697426319 66.1650385535549 42.750861693377 57.1070449050465  
61.8665316900291 48.6494451061637 38.528621456378 42.4580504587581  
37.7526485343328

DNAJJC24 83.877343750194 115.221134337342 94.5055588176321  
107.337113678019 82.0149542477384 160.853643241489 75.8779316255794  
72.5835488194631 92.0711167984454 94.1575209300592 98.7446830481164  
111.357508398822

DNAJJC25 77.4999637278723 76.861722336069 60.4809187893259  
78.5141640924736 82.9322141700549 118.57174795047 71.193768715137  
92.9043863423147 70.5699797830702 102.771611905219 104.528976428975  
117.355761277966

DNAJJC27 68.6627996695828 67.6169355376864 68.0649030501515  
55.8709511400674 72.1154333023225 134.239606718101 71.5249259772583  
115.052948380817 82.3364971911816 121.236881661832 102.993620677265  
89.5687388187015

DNAJJC28 42.175859643566 39.5050383901884 40.5734458834617  
42.1679276329916 41.4479871197761 39.9871741554388 39.3585350448719  
38.6005272730664 41.9180247412837 39.6205203043973 39.9671443011409  
37.9202704407098

DNAJJC3 52.2236479204029 57.9509155144056 52.1242102345408  
134.952392466784 51.3511088648386 45.3882138838137 63.5738862549306  
64.120219344545 62.370559099758 53.8260140375214 52.6960621424156  
46.8129509799753

DNAJJC4 44.1294459089314 52.7493349111555 62.5610562594275  
48.4916117779992 66.1650385535549 67.5812474586277 55.8019623191927  
58.3046521633424 43.5669306063196 78.0658258913875 66.2027948645675  
57.3697604614404

DNAJJC5 113.113062709739 124.605379715077 82.5344501505114  
124.350816245276 102.913039837094 82.260686909201 94.7980740999988  
91.5258329186709 106.317388820963 66.274247400793 75.9802606133139  
81.3082994649699

DNAJJC5B 40.148780650831 36.7976562409506 43.401782064778  
54.2886483704949 39.7568367479301 39.4953494583071 40.7910160811527  
39.4710743516517 42.9020321355927 33.9967481174035 39.6403089864678  
37.1747156131306

DNAJJC5G 32.6285977114039 38.1312950900467 38.0452862258803  
40.3180310664156 45.2556760873335 43.0860383229288 47.7390230243778  
41.7419877611072 38.5252456306656 39.5637454855233 36.2435874904689  
41.863927676552

DNAJJC6 37.6817357354748 39.5050383901884 38.741573807882  
41.1886975241176 38.8834538955 40.244271403831 39.3585350448719  
41.1575777497576 44.7752571196612 44.1861590259178 40.4995052849302  
36.1190722948669

DNAJJC7 225.618853905635 175.28322146764 145.791398829369  
200.591114641608 169.693594531146 177.602690452814 214.691909801388



257.050603883498 283.747865829282 178.219279777774 183.311305255895  
190.161505611036  
DNAJC8 1442.72006787259 1041.84536202049 1224.80240464583  
1585.90718459092 1829.30985071028 1896.06380611235 1557.42399344934  
1529.52516575545 1591.51486001004 1537.76265834076 1769.18069954113  
1426.87261062373  
DNAJC9 498.608204176238 483.882804472844 328.855843739232  
218.727705098677 489.983164420779 250.545098051392 643.71203221441  
355.642611713396 1254.34397143795 245.0324923457 213.768352764473  
270.600852806342  
DNAL1 53.3343962424887 48.4724651632766 49.4067286971348 48.665578118898  
50.2953638261991 60.3254877099749 48.6395795163502 60.4809187893259  
55.2485665256307 52.6040246568056 51.1905212004904 57.2767879969284  
DNAL4 432.945510073269 597.996273468244 400.973553604192 210.5650813431  
364.337811621248 273.275823600027 856.790359133679 662.848386826617  
465.981133154896 500.241231327789 574.467486140819 434.841521967958  
DNALI1 48.9906383294199 101.804757613639 47.5673419710251  
48.309866878365 62.9553576299033 117.823678167648 103.316970096472  
58.9081750508316 61.2510119532409 104.672760332135 102.559678338485  
86.0230765383602  
DNASE1 63.7818442618767 49.83247261979 56.8595344107711  
42.5664883002833 49.452985143568 47.2009420656854 40.6750540874299  
48.7814131120945 52.0583273941813 43.401782064778 47.299647867533  
48.6037684272115  
DNASE1L1 76.3933911546385 78.6705291023488 102.786429761295  
87.3870406334559 109.14984236229 70.2021753365478 72.3095457386378  
66.6320017520888 75.2779848783367 58.037539503209 61.6878176260761  
71.5836731059913  
DNASE1L2 53.2046867327331 67.1926218405833 47.646800205189  
45.7397504535169 61.4366256816323 42.9695585740813 50.0088611244948  
49.2019743609873 56.2441895183416 44.0409178714232 42.911855821602  
42.8864415494484  
DNASE1L3 45.8108990837624 122.292794686468 42.9104454767916  
85.3754356809649 52.2089306840125 49.5424425850549 49.6872467499977  
50.7364620410977 44.619512785899 44.3648993568405 42.170702295259  
53.3059058105836  
DNASE2 493.705301673753 536.013150313097 474.155196153863  
839.850453078119 773.781266760336 279.175841990291 385.918487165555  
401.347734852083 371.513106715598 401.347734852083 347.196922795214  
348.206465194205  
DNASE2B 38.0698669928229 40.9298924777825 44.6484005362281  
43.8479689858951 42.9090346219023 41.0582900711341 44.1350486752012  
41.7419877611072 42.6679886757687 39.4012855594431 40.5084378738092  
42.6758568421347  
DNCL1 3282.4852236415 3421.24021192326 2771.14077845128 2257.78227736778  
3681.41904661708 2934.35616793443 3761.48462220262 2357.96534075689  
4036.89580181979 1932.2647526188 1928.53890809223 3010.38998829232  
DNCL2A 39.0620487644635 38.5252456306656 44.696023817801  
52.1201052574162 50.2163892855092 53.4466111440611 45.3597029614942  
44.293922970134 42.9020321355927 36.1550293353654 39.2542963855807  
45.5800840647989  
DND1 45.0985088502363 41.554942319225 43.0971787292711 52.5307002738469  
51.940083408061 40.650742261428 48.6395795163502 43.2551508830106  
43.3744503319109 38.2069499294002 42.911855821602 40.9683275553869

|         |                  |                  |                  |                  |
|---------|------------------|------------------|------------------|------------------|
| DNER    | 44.5282181324797 | 41.9894412416874 | 45.310660704531  | 41.4273122914951 |
|         | 41.0885562160946 | 63.6894484284172 | 50.0088611244948 | 37.4484310268909 |
|         | 35.6970528713709 | 62.2025996860055 | 54.7883681830995 | 49.1200355938198 |
| DNHD1   | 49.3463416794995 | 46.6996902348633 | 53.5698357689852 | 50.0526763693329 |
|         | 57.6791750431251 | 52.2089306840125 | 38.7337086062875 | 47.9942520395434 |
|         | 52.2631308081333 | 45.9004543328976 | 58.2941346100716 | 53.2046867327331 |
| DNHD2   | 41.9407041937973 | 38.2263227947189 | 37.2838080935695 | 36.890925044696  |
|         | 38.2496050953547 | 45.3882138838137 | 34.9344532055397 | 41.2551966132486 |
|         | 36.2733735494625 | 44.6918600441328 | 41.6336636285875 | 35.5523662009011 |
| DNHL1   | 43.9309845324767 | 41.8073910693411 | 42.640829914102  | 40.8084239472012 |
|         | 41.0476065156912 | 40.4359177791566 | 41.7614975630362 | 44.6511073781104 |
|         | 40.2274522635576 | 48.9826868640753 | 47.9942520395434 | 44.4951343330035 |
| DNLZ    | 484.651969259966 | 200.082941320005 | 104.704892803169 | 208.553134986809 |
|         | 250.545098051392 | 255.762638489554 | 378.964387825252 | 188.408367998553 |
|         | 238.246319539302 | 188.042978085327 | 224.14182624489  | 166.931246502269 |
| DNM1    | 66.5500089527674 | 41.2598458726002 | 42.640829914102  | 44.550322123994  |
|         | 53.9074374788981 | 63.1091746640396 | 40.5585676679482 | 47.0940613507321 |
|         | 52.4539007817929 | 57.2813205536176 | 62.5036823572932 | 45.4799270968969 |
| DNM1L   | 129.091447141381 | 215.290701336046 | 181.873969432903 | 133.765486891316 |
|         | 174.469283513638 | 184.340249262704 | 215.175765091556 | 110.214922820817 |
|         | 146.681796324406 | 85.9910479975356 | 112.565968152932 | 167.824386984618 |
| DNM2    | 172.381808887528 | 261.51893439249  | 508.081726674689 | 265.320447667174 |
|         | 208.897032780128 | 127.352997770688 | 224.249210397247 | 241.24267509333  |
|         | 307.974082654351 | 343.990395610093 | 410.257694738546 | 158.853244260329 |
| DNM3    | 46.6348258763289 | 36.5219488315447 | 41.8751578329365 | 47.0874209746031 |
|         | 48.3814421939888 | 44.3648993568405 | 46.7100796279384 | 41.7419877611072 |
|         | 34.6720534245631 | 47.0055981216687 | 52.022479439889  | 40.4639532172338 |
| DNMBP   | 44.9896851005259 | 45.6533175604486 | 47.0940613507321 | 44.4367387274922 |
|         | 46.9906120932727 | 49.4157684139858 | 39.4600924554505 | 43.844855336215  |
|         | 42.5406888281114 | 40.4136535208406 | 45.1432412071268 | 42.7782216342806 |
| DNMT1   | 368.972794063004 | 605.338871441599 | 424.87896140215  | 386.170232791927 |
|         | 904.487756674518 | 345.876877384089 | 554.551745559065 | 334.016152807947 |
|         | 721.887210480162 | 189.890451486324 | 315.487514440864 | 347.908556198025 |
| DNMT3A  | 41.5787026298957 | 44.3874750238889 | 43.5367669381526 |                  |
|         | 44.265834798964  | 44.3201481615451 | 52.2089306840125 | 40.7340599105623 |
|         | 42.6808744813778 | 40.3704050658025 | 42.9285286409526 | 46.794716003113  |
|         | 46.1980780531506 |                  |                  |                  |
| DNMT3B  | 50.6109448604627 | 54.6089451252049 | 56.0245669026819 |                  |
|         | 42.6082786891193 | 60.6628365130306 | 46.0817481577316 | 70.3454355021212 |
|         | 64.0476795495651 | 63.955655956484  | 67.5206810636627 | 58.4134572546373 |
|         | 50.6937447392501 |                  |                  |                  |
| DNMT3L  | 38.6213341190836 | 39.6995529770239 | 40.6312687664188 |                  |
|         | 42.1273928203021 | 43.5836473788312 | 41.9069736908705 | 40.2154497375715 |
|         | 36.1375121409002 | 39.5411918095433 | 46.5650556481721 | 41.2267153672559 |
|         | 41.2905987859365 |                  |                  |                  |
| DNPEP   | 68.2614370871382 | 75.3462586192013 | 58.5212649095879 | 46.4555908533915 |
|         | 85.0017995689256 | 69.4214927857472 | 61.3620062177524 | 69.5741225986433 |
|         | 87.6018870099686 | 64.0162246399972 | 60.4620008899889 | 86.4937293696262 |
| DNTT    | 40.8681871019812 | 35.9305494063137 | 42.9641759692926 | 45.6706505553383 |
|         | 40.2449343247539 | 39.7697110924474 | 40.369768755239  | 40.2382908228517 |
|         | 42.9413736814915 | 42.6793753550854 | 39.4410515050885 | 41.1066323911308 |
| DNTTIP1 | 281.602712448925 | 202.103107745135 | 170.105455298636 |                  |
|         | 282.328238928883 | 192.377506427627 | 286.68367978144  | 311.055487966495 |

177.688415930665 179.767874494671 177.173301602325 195.58977358589  
 163.844659359002  
 DNTTIP2 40.4639532172338 43.5182502375207 33.7737772393677  
 37.5382094267692 44.6834648302383 36.2015763253919 39.1539892144371  
 41.3506832276112 37.3600014814388 38.6454098044474 38.3684202018524  
 44.6484005362281  
 DOC2A 42.3620028137457 40.4772513262052 40.7910160811527 38.5252456306656  
 61.8471691369569 43.0177448037924 42.2577689927563 44.4031868028216  
 39.8048943625718 41.7932258301997 43.6629145624937 42.6278608611758  
 DOC2B 46.5549623118323 46.0713306971594 51.5292723244077 41.5464765641928  
 47.6884372645373 48.260931742163 41.3594868055879 68.580705761277  
 41.863927676552 45.1569741609597 47.5439485437351 44.0451487108213  
 DOCK1 110.362432903746 101.58345410371 127.49459343016 80.8728961146267  
 103.619396986593 169.18132209076 98.0023132593711 115.221134337342  
 93.9756797434207 168.522052983892 159.268245287939 172.192366002756  
 DOCK10 111.041991642022 127.82585786161 118.720812623965  
 425.026540236907 54.0126916508417 93.9805435116156 72.4651758215622  
 85.6673237797982 48.8067321016961 74.3981029634178 78.3542840447759  
 67.5047089908724  
 DOCK11 90.6805895192707 66.0479079234982 69.5937318502259  
 223.168185178205 48.0234896130991 177.515053183327 66.6894494536346  
 80.8333046859586 51.2776048338 76.1382217104599 85.6301407137205  
 132.188774889597  
 DOCK2 120.837993273922 184.859183550225 184.201497822259 589.395944599882  
 84.4230484528318 200.351560652506 119.015431849218 132.663052961193  
 48.3119523820103 67.3934788330567 63.9617548533553 83.7829283976292  
 DOCK3 37.55264801907 37.920964499903 37.7384958256497 39.2780515621926  
 72.4060089486729 42.750861693377 37.830876898596 40.7311497914871  
 40.5912213523345 47.0055981216687 44.1148826235374 44.6484005362281  
 DOCK4 36.8072833828297 40.8880530359822 44.7829632472754 44.4367387274922  
 39.2608760193011 41.159706131351 36.197424053556 36.8400213077707  
 40.4997186069494 42.8936990772838 36.7283081422707 37.2810767789306  
 DOCK5 61.7551416187554 44.9370339275041 49.3000844711116 97.2220312216969  
 45.9104478407175 41.7627910693483 55.4004611309636 57.9713749600418  
 43.8482802038826 52.6879797806876 54.2999306485758 54.293880614303  
 DOCK6 140.853812988562 173.819948756127 273.070365538675 96.5813769696577  
 131.156876010639 86.7776945455037 82.9431583622036 128.146059846414  
 172.252848888699 135.007055711266 140.610918488396 126.838679504229  
 DOCK7 116.35075921851 104.740168626646 83.3826639718546 87.114638423256  
 113.491158368594 81.6472320169489 99.9896394343368 92.3532155362085  
 117.239774193934 76.0532592222027 73.6679006272617 92.6888475289584  
 DOCK8 76.2368668439875 158.806855832703 82.8205269728224 354.861943266984  
 48.2748123114598 64.0985088513857 101.46584765758 142.714450804595  
 64.4588422949237 107.840833498938 110.287699369482 107.337113678019  
 DOCK9 73.0970339739187 80.4334958198115 99.1502352565568 59.2778887402357  
 67.8233625051884 82.7269382676336 51.9421032049606 60.5571721986885  
 77.4186160113063 59.8130420783374 78.3542840447759 79.9447969637409  
 DOHH 54.1745577382276 55.6972661824064 40.7620472083159 44.4367387274922  
 73.4535007027931 50.2163892855092 58.2315917325629 54.9919060580109  
 48.8067321016961 58.9069025298754 51.2318935933116 53.655233033193  
 DOK1 35.8208542506595 38.0226905622357 42.0621425894624 32.9046688061235  
 32.9756367838345 37.4782441311626 32.1218888714537 37.0390589468421  
 39.4762546236449 38.6454098044474 40.723990462047 37.7526485343328

|        |                  |                  |                  |                  |
|--------|------------------|------------------|------------------|------------------|
| DOK2   | 42.466333667839  | 45.6948619492056 | 46.8267540220952 | 48.309866878365  |
|        | 37.7170995811297 | 43.7078399718247 | 40.7376840028647 | 32.8834169462007 |
|        | 36.3649677956953 | 39.1177164316495 | 41.9495387255163 | 38.745552403895  |
| DOK3   | 44.9896851005259 | 48.4497719907777 | 46.4569566520107 | 102.786429761295 |
|        | 35.2163900400329 | 39.2248354955045 | 37.830876898596  | 38.5457716679071 |
|        | 41.2870505273664 | 40.3235655331796 | 34.174642681781  | 41.4508241771315 |
| DOK4   | 106.219480656782 | 157.040132256772 | 144.17470770145  | 68.4261608261522 |
|        | 58.5450868286167 | 106.186051982612 | 93.2133061608764 | 80.9092480872499 |
|        | 100.591821617326 | 130.812376632261 | 102.993620677265 | 100.677422836631 |
| DOK5   | 42.9104454767916 | 44.0409178714232 | 36.178547300352  | 39.1706564265495 |
|        | 38.0598374201407 | 44.3648993568405 | 43.5627649099623 | 41.1575777497576 |
|        | 41.2870505273664 | 35.8304004211528 | 43.9450023643394 | 41.7575097298927 |
| DOK6   | 52.6960621424156 | 44.6918600441328 | 44.6032218589199 | 37.9875302985336 |
|        | 47.9128504683618 | 173.357715186701 | 44.9863726205428 | 44.0390019242862 |
|        | 43.3744503319109 | 56.8201201798712 | 64.1267046511632 | 48.1627097465883 |
| DOK7   | 59.0463859571117 | 58.7111274254142 | 55.8810837854139 | 43.5627649099623 |
|        | 58.4383854340181 | 43.4681646416585 | 42.2577689927563 | 54.0507720792049 |
|        | 61.6839343510302 | 62.3233491851723 | 61.1801493883012 | 50.7487159427973 |
| DOLK   | 201.180226922613 | 129.299077627671 | 117.355761277966 | 138.189579100482 |
|        | 150.221698290502 | 97.9586375307737 | 144.227861902786 | 135.361059757705 |
|        | 134.024691118762 | 140.199798713912 | 112.007118067348 | 94.6167194649276 |
| DOLPP1 | 103.561100886469 | 108.083751469991 | 82.1344514651393 |                  |
|        | 66.0397471691747 | 129.613152757362 | 64.5187138759372 | 163.011116329807 |
|        | 89.6313467455698 | 140.187433247353 | 107.501868837432 | 102.380096190518 |
|        | 99.7529382840954 |                  |                  |                  |
| DOM3Z  | 97.8141040140486 | 105.699748702315 | 107.501868837432 | 104.335120306753 |
|        | 123.800965644574 | 85.0275638433103 | 135.540738841602 | 91.6777754418002 |
|        | 112.743602566917 | 104.928805304068 | 116.080897948094 | 95.1224420992193 |
| DONSON | 75.7342400123505 | 84.5572894783679 | 102.607924735378 |                  |
|        | 61.5515639412892 | 126.578693258328 | 69.64983895075   | 131.955454394903 |
|        | 74.0831311663524 | 119.634256037186 | 50.9506778292488 | 51.2623287419357 |
|        | 65.1251519077199 |                  |                  |                  |
| DOPEY1 | 51.5888395924843 | 84.6158251687884 | 89.7299583757595 |                  |
|        | 65.524821699432  | 51.5888395924843 | 85.8059456975413 | 69.6301237585571 |
|        | 65.0656365694468 | 75.9909523932333 | 66.0786923699684 | 81.8648220673828 |
|        | 83.0460206754856 |                  |                  |                  |
| DOPEY2 | 226.672191323896 | 97.1634390603131 | 155.617122020913 |                  |
|        | 160.702832529922 | 119.167027972122 | 82.5279746006378 | 181.45962058846  |
|        | 293.300203370043 | 129.143252341926 | 146.046179302584 | 148.608392563633 |
|        | 120.641774274815 |                  |                  |                  |
| DOT1L  | 41.1523487516364 | 43.1805016690297 | 42.3536549114165 | 46.7577982595088 |
|        | 49.452985143568  | 46.0364000143537 | 49.6872467499977 | 45.1714698794331 |
|        | 47.27543600687   | 41.3321861371202 | 42.8263096141654 | 44.9070250604284 |
| DPAGT1 | 176.687970262952 | 205.627744150936 | 163.66696652324  |                  |
|        | 136.711122812062 | 280.680953068339 | 120.02765867291  | 195.190044833888 |
|        | 168.225699005719 | 185.079035617027 | 130.812376632261 | 148.178364767218 |
|        | 189.705164944697 |                  |                  |                  |
| DPCR1  | 39.7576136507593 | 36.7976562409506 | 34.0382693188794 | 44.4367387274922 |
|        | 43.004943518025  | 40.4359177791566 | 33.1392460259336 | 39.7509165247419 |
|        | 39.1790517315259 | 39.4710743516517 | 43.0016969050339 | 43.2776458914333 |
| DPEP1  | 40.4639532172338 | 34.6306468196142 | 44.2405728317107 | 48.1662933382789 |
|        | 42.1650127805175 | 36.3845892764084 | 47.2927436772465 | 37.9837233601316 |
|        | 43.5669306063196 | 43.1839109702714 | 40.1742127891824 | 44.9070250604284 |

|       |                  |                  |                  |                  |
|-------|------------------|------------------|------------------|------------------|
| DPEP2 | 48.8333989709933 | 70.0470864733496 | 192.632227878708 | 259.43283734195  |
|       | 44.147557390293  | 78.1952428431942 | 80.6634117492762 | 96.5813769696577 |
|       | 51.8083208406279 | 233.96534264787  | 74.9541456286637 | 177.535502927617 |
| DPEP3 | 46.0920218698606 | 47.6914221838216 | 35.8265993915844 | 44.7980740332174 |
|       | 49.8304479381623 | 53.7442594289333 | 47.2927436772465 | 48.1591264215184 |
|       | 40.9901805728485 | 42.1622837416589 | 40.9157352260901 | 45.1735152121056 |
| DPF1  | 51.1055541075029 | 46.1569135229922 | 45.4865173433646 | 43.6726153508978 |
|       | 50.2163892855092 | 39.6251842352088 | 45.8980298854198 | 44.8997235283254 |
|       | 45.4799270968969 | 42.785429206422  | 41.7272875295469 | 41.0657892043496 |
| DPF2  | 206.514263103112 | 339.679549262298 | 250.65667565007  | 197.171449112363 |
|       | 548.217757366495 | 311.810240385503 | 332.745139672471 | 202.529846569324 |
|       | 318.609131605258 | 368.005081137665 | 388.336994961328 | 226.719775835218 |
| DPF3  | 38.0089018744739 | 37.920964499903  | 44.0451487108213 | 45.1944222548351 |
|       | 35.5220586859301 | 45.4882438975269 | 44.8643898647322 | 42.7431359850339 |
|       | 43.5669306063196 | 40.2112371512838 | 42.170702295259  | 46.8129509799753 |
| DPH1  | 58.651329686676  | 67.6169355376864 | 61.841867306916  | 51.223859150798  |
|       | 62.1836961153924 | 62.7515429046888 | 65.8986841086198 | 68.1311562787361 |
|       | 67.0290776715331 | 55.4037482627222 | 61.940656536312  | 56.2804354745795 |
| DPH2  | 128.281765653795 | 124.691222601355 | 85.417321091835  | 70.8088594316677 |
|       | 194.189674572424 | 81.8426140611297 | 100.423344358771 | 117.723425661764 |
|       | 115.087963545095 | 88.1199908664065 | 78.2839612497413 | 74.2473868510319 |
| DPH3  | 104.17651993553  | 85.7208881534518 | 105.726287089142 | 165.496075703734 |
|       | 207.710354513208 | 104.860298453006 | 109.130081850144 | 121.510087314197 |
|       | 87.9297641099558 | 46.7168353198002 | 52.9405267581903 | 86.9924799927707 |
| DPH5  | 144.266359480086 | 101.634888749356 | 148.42234459694  | 107.478392667404 |
|       | 138.070735985503 | 212.032445918948 | 96.2959923858457 | 122.036614711384 |
|       | 128.827672077002 | 157.7623351008   | 136.408012600787 | 203.092045210928 |
| DPM1  | 406.500583302121 | 359.940393399742 | 347.420750861056 | 340.105993325165 |
|       | 547.729200972776 | 318.768560912915 | 438.22469176123  | 384.180564204564 |
|       | 443.269396125834 | 169.18132209076  | 240.841214170409 | 410.979796414875 |
| DPM2  | 112.733531624555 | 88.3212200388592 | 74.9820339135242 | 83.764882413379  |
|       | 109.23113111292  | 75.6382797289563 | 148.333778341005 | 79.1039287828151 |
|       | 96.5851811404251 | 72.3822545261582 | 75.4466520363487 | 75.7464604972652 |
| DPM3  | 550.642253702646 | 302.20349084931  | 302.978457293429 | 261.826480747537 |
|       | 456.467726693355 | 455.774407260725 | 904.487756674518 | 300.703401968169 |
|       | 400.327164003217 | 409.312313055794 | 351.439404852971 | 298.282957415786 |
| DPP10 | 43.781101409552  | 37.3634897565502 | 41.3708420203838 | 44.0451487108213 |
|       | 41.1868052124344 | 40.040778349137  | 42.4493032770053 | 41.0844534776541 |
|       | 39.4762546236449 | 45.0864985243943 | 41.9495387255163 | 37.9607839934735 |
| DPP3  | 92.6545309624315 | 156.591349262922 | 153.544554979202 | 89.2503940049313 |
|       | 155.252915611651 | 61.1630754250653 | 151.912182086236 | 137.785462971848 |
|       | 109.889322825648 | 76.2533853403813 | 92.9453353261232 | 89.2385568686014 |
| DPP4  | 52.9609836781499 | 47.2770121962655 | 56.3471340054074 | 45.4634652319753 |
|       | 44.6834648302383 | 45.8325181856483 | 44.8643898647322 | 43.6434576713809 |
|       | 47.27543600687   | 41.4397539024976 | 43.844855336215  | 47.0130468198828 |
| DPP6  | 38.957687788868  | 39.9697332660833 | 38.2280071951674 | 39.4652349255591 |
|       | 40.7273974755431 | 40.5940318808889 | 38.2933870238743 | 39.8965727231863 |
|       | 39.8016018354453 | 37.5576991642607 | 40.1362682639916 | 38.8495095797881 |
| DPP7  | 153.901083585889 | 260.426488908824 | 167.653939596625 | 212.92335057985  |
|       | 192.763875975315 | 160.080366694799 | 139.758805241617 | 116.35075921851  |
|       | 121.064136717339 | 138.362914843774 | 157.095926797414 | 156.864177272437 |
| DPP8  | 70.5619719048506 | 74.7370458648253 | 61.4944752562671 | 66.7008819035152 |
|       | 72.3388488936832 | 84.3040298294164 | 70.3935694362568 | 68.8698243753339 |
|       | 84.7899210293383 | 83.0700092537618 | 87.5915970147626 | 82.7229468743536 |

|           |                  |                  |                  |                  |
|-----------|------------------|------------------|------------------|------------------|
| DPP9      | 276.399037769005 | 202.957014793417 | 235.047133588022 | 276.029709051798 |
|           | 251.105933757167 | 198.15553991394  | 295.014183084118 | 299.428590398636 |
|           | 231.555264329444 | 413.723725202787 | 330.550018306903 | 242.396401163598 |
| DPPA2     | 38.7537364570873 | 40.3384318592985 | 43.7630587657205 | 42.9358255168086 |
|           | 49.0828761839116 | 36.4986986135769 | 40.9157352260901 | 39.853866204927  |
|           | 40.137818555383  | 43.401782064778  | 39.6403089864678 | 40.8681871019812 |
| DPPA3     | 39.8234920704779 | 39.8455060654531 | 38.4456289125816 | 44.6905691366696 |
|           | 41.7426502114261 | 44.0399598874356 | 42.22763273471   | 44.6107027295193 |
|           | 37.9273653326866 | 40.0557788909923 | 39.9070785037411 | 40.0557788909923 |
| DPPA4     | 42.442231667357  | 40.8880530359822 | 41.0356368374708 | 42.6913548400127 |
|           | 44.9936360641969 | 35.5158505219112 | 40.4359177791566 | 35.5798430594271 |
|           | 39.1790517315259 | 36.2435874904689 | 41.7272875295469 | 44.1452943804044 |
| DPPA5     | 37.6397652536077 | 41.2598458726002 | 45.3974838013476 | 42.1273928203021 |
|           | 39.6535880152834 | 41.7627910693483 | 38.6243997507646 | 41.3506832276112 |
|           | 50.401623258584  | 32.6203270051744 | 42.2618615571566 | 41.4508241771315 |
| DPRX      | 40.7609952437622 | 40.3384318592985 | 41.437237454134  | 34.8137085420423 |
|           | 41.6806984441849 | 39.4953494583071 | 38.5066108855005 | 43.4544762830742 |
|           | 38.0213051227859 | 37.920964499903  | 40.9157352260901 | 36.2582325396375 |
| DPRXP4    | 40.4639532172338 | 42.3550738181144 | 46.2625470410195 |                  |
|           | 43.4812166409346 | 45.1137938810047 | 43.1826328292558 | 43.9450023643394 |
|           | 42.9887069977696 | 39.1467972692656 | 45.6868589181768 | 45.7328341667151 |
|           | 40.1235656101329 |                  |                  |                  |
| DPT       | 205.627744150936 | 43.0227387991135 | 38.9790184198145 | 66.9218519793499 |
|           | 39.7568367479301 | 1271.62760896761 | 40.2154497375715 | 41.5464765641928 |
|           | 37.0126425326534 | 596.84269596976  | 432.355300448283 | 142.945182805248 |
| DPY19L1   | 245.060552951511 | 250.244199415895 | 373.626843592567 |                  |
|           | 234.113622230498 | 208.060345754611 | 206.899594905509 | 171.853856533964 |
|           | 173.800190134221 | 277.878824242495 | 193.830224000034 | 235.222472959869 |
|           | 338.966238813782 |                  |                  |                  |
| DPY19L2   | 45.8108990837624 | 39.6995529770239 | 45.989212296035  |                  |
|           | 40.4359177791566 | 42.4864576619427 | 65.813547096222  | 42.7431359850339 |
|           | 42.6450179841129 | 46.9739160257217 | 46.5650556481721 | 44.1148826235374 |
|           | 39.5418280570561 |                  |                  |                  |
| DPY19L2P2 | 39.6609238036815 | 38.5252456306656 | 44.5134109184888 |                  |
|           | 46.1074305700679 | 38.7004513165111 | 42.0574848021044 | 41.0381860307445 |
|           | 45.4882438975269 | 43.8482802038826 | 40.8970401536578 | 42.357910063876  |
|           | 41.6031169661721 |                  |                  |                  |
| DPY19L2P4 | 43.0930293831497 | 39.9697332660833 | 43.9450023643394 |                  |
|           | 46.0228732507872 | 42.7982502551634 | 37.2686490268265 | 43.8206425661746 |
|           | 42.7431359850339 | 46.8873421271259 | 38.528621456378  | 41.5421429082231 |
|           | 45.4799270968969 |                  |                  |                  |
| DPY19L3   | 45.9090659324223 | 59.3406363431414 | 51.223859150798  |                  |
|           | 39.066284740632  | 68.0414563597154 | 54.2503023961401 | 57.7805922926828 |
|           | 54.5125550937898 | 57.1863195337055 | 41.7405682794166 | 41.1638563416981 |
|           | 52.8455400026194 |                  |                  |                  |
| DPY19L4   | 98.4084364053686 | 95.9750691854349 | 90.5553202429233 |                  |
|           | 75.9099205260748 | 152.608998839745 | 89.2185019250322 | 101.065203693106 |
|           | 81.7765447802116 | 141.067111495922 | 122.576931376426 | 121.423421895502 |
|           | 130.865421554474 |                  |                  |                  |
| DPY30     | 424.709002690579 | 322.371597171026 | 390.834121304799 | 289.112248695929 |
|           | 306.487935692954 | 312.795596385258 | 560.802447943839 | 616.912306849151 |
|           | 398.43592055172  | 204.370291548631 | 223.749512763927 | 478.296779356592 |

|        |                  |                  |                  |                  |
|--------|------------------|------------------|------------------|------------------|
| DPYD   | 53.2046867327331 | 46.29198852834   | 48.3847843498476 | 109.726577835621 |
|        | 43.844855336215  | 96.034706957068  | 46.7100796279384 | 44.6107027295193 |
|        | 50.8485682149772 | 68.4137459386155 | 67.6271456814495 | 62.58750768974   |
| DPYS   | 34.1336988442837 | 39.5050383901884 | 41.2365089689635 | 42.9358255168086 |
|        | 36.7356360093603 | 38.6414316877471 | 42.9803717121865 | 37.5511560880902 |
|        | 39.1790517315259 | 36.8059561571675 | 37.8372168909583 | 41.7575097298927 |
| DPYSL2 | 698.595302020108 | 400.973553604192 | 342.643344197936 |                  |
|        | 1053.67279913417 | 301.257549182222 | 1707.92349760322 | 157.843337785472 |
|        | 366.716775127375 | 223.562130663956 | 895.735191953679 | 935.815928529014 |
|        | 982.428740433235 |                  |                  |                  |
| DPYSL3 | 1611.35913846618 | 201.180226922613 | 153.711194034581 |                  |
|        | 640.944514118411 | 144.799432299339 | 3296.66056024983 | 186.620669365322 |
|        | 440.728435508514 | 266.323732730581 | 2640.06306087033 | 1813.65521720537 |
|        | 1595.69503047506 |                  |                  |                  |
| DPYSL4 | 129.785929766258 | 159.393207489822 | 42.9104454767916 |                  |
|        | 45.1944222548351 | 83.0497574039035 | 58.4435847520801 | 53.0277416531043 |
|        | 49.6203214143464 | 41.5635499110307 | 45.0155543555707 | 45.5707650534259 |
|        | 50.8442982601142 |                  |                  |                  |
| DPYSL5 | 46.3390850717989 | 38.2263227947189 | 37.5597671487621 |                  |
|        | 39.9697332660833 | 41.1868052124344 | 38.4330755397458 | 41.3594868055879 |
|        | 47.8947595316832 | 45.8325181856483 | 48.8623729374733 | 40.1742127891824 |
|        | 37.0953622406687 |                  |                  |                  |
| DQX1   | 36.7356360093603 | 51.3800036046133 | 54.9071823326024 | 42.357910063876  |
|        | 42.269054475455  | 47.9503724044453 | 37.7136011474903 | 41.9315419791594 |
|        | 43.7630587657205 | 38.6454098044474 | 43.0971787292711 | 49.6629259325705 |
| DR1    | 91.5417574979683 | 82.3344892042646 | 92.3034609409756 | 82.0292880742189 |
|        | 101.867388894697 | 94.8884063433735 | 95.5117928427637 | 108.57858133896  |
|        | 105.825228126465 | 78.0658258913875 | 93.2484615907966 | 108.479856042609 |
| DRAM   | 251.803102904399 | 234.078434290473 | 188.513581321162 | 510.82619253142  |
|        | 138.895316905243 | 213.140641182603 | 146.117756310709 | 148.403272698474 |
|        | 164.642060754649 | 208.457587834567 | 214.873872837015 | 339.210875653066 |
| DRAP1  | 566.318259999405 | 654.682263833024 | 790.786577596971 | 781.223434214089 |
|        | 539.879151334921 | 795.381998233245 | 873.451893437179 | 757.257495810249 |
|        | 781.223434214089 | 534.881442644054 | 606.123659335794 | 513.57613902662  |
| DRD1   | 39.7576136507593 | 43.8495248991589 | 41.437237454134  | 35.3829784221072 |
|        | 34.4570158133896 | 36.0306975524309 | 38.5066108855005 | 38.956280281655  |
|        | 42.1594905198929 | 39.9948390976317 | 42.911855821602  | 39.0536056496869 |
| DRD1IP | 37.7384958256497 | 41.159706131351  | 37.3687900733549 |                  |
|        | 41.1886975241176 | 40.5710637884029 | 41.0582900711341 | 37.830876898596  |
|        | 54.6067620335514 | 37.2810767789306 | 38.4187686307607 | 37.7384958256497 |
|        | 38.745552403895  |                  |                  |                  |
| DRD2   | 37.6786104343959 | 40.0527893189096 | 37.9946685306274 | 40.8681871019812 |
|        | 36.08956004634   | 40.3357777530419 | 41.0995198212729 | 35.1169296995348 |
|        | 38.4344387289956 | 37.7668944701279 | 37.1617810121175 | 38.8146043755011 |
| DRD3   | 41.9407041937973 | 41.8848959280916 | 38.5045333213784 | 38.4571887275378 |
|        | 38.5115309709704 | 41.7627910693483 | 40.7910160811527 | 38.3684202018524 |
|        | 39.8763736543526 | 45.642304356051  | 40.6783687486496 | 44.0977148249302 |
| DRD4   | 135.00141569592  | 82.1344514651393 | 112.60230393988  | 68.6379135603075 |
|        | 53.3086645804786 | 63.3612993417558 | 59.8273072817267 | 116.434267173815 |
|        | 112.805898501551 | 72.1090339831747 | 96.0126406688619 | 66.295597720304  |
| DRD5   | 39.266565827316  | 42.0709558258414 | 45.063792968927  | 42.2496337895968 |
|        | 42.0709558258414 | 41.554942319225  | 46.8613212048981 | 40.831207953647  |
|        | 41.4636047919453 | 43.6033221838149 | 41.4508241771315 | 43.6753843488695 |

|         |                  |                  |                  |                  |
|---------|------------------|------------------|------------------|------------------|
| DRG1    | 357.254500791202 | 302.50850157207  | 317.0659599072   | 276.029709051798 |
|         | 314.281125546552 | 426.015657750123 | 431.727858902449 | 354.158105175308 |
|         | 449.427251674566 | 288.237195966495 | 295.194516063502 | 347.145902252055 |
| DRG2    | 99.7403508491191 | 173.977605406146 | 121.120217132666 | 112.957927208627 |
|         | 148.544012961815 | 150.242221910229 | 151.266092912661 | 132.931052537195 |
|         | 144.098339910117 | 179.064697219173 | 207.671418362257 | 124.628895737993 |
| DRGX    | 39.7576136507593 | 38.3322849790657 | 42.7303139017786 | 41.5464765641928 |
|         | 51.7983110178095 | 43.5752393599169 | 40.1235656101329 | 47.2009420656854 |
|         | 44.1519466943185 | 44.2580151149956 | 39.2542963855807 | 40.4639532172338 |
| DRP2    | 39.266565827316  | 34.2618170189676 | 38.2280071951674 | 32.554751989205  |
|         | 35.0181575202066 | 34.0777108441756 | 36.08956004634   | 35.9023742468744 |
|         | 38.3418933808844 | 34.064698871541  | 37.3687900733549 | 37.0953622406687 |
| DSC1    | 41.8833988894167 | 42.7275315121163 | 40.1985790927248 | 39.5050383901884 |
|         | 40.9950639693255 | 40.8091178323174 | 38.5066108855005 | 41.5464765641928 |
|         | 40.8420925848403 | 41.2276963324981 | 40.4094901248527 | 37.6557714476853 |
| DSC2    | 61.6966068000136 | 46.8954576545929 | 56.3471340054074 | 89.815123920749  |
|         | 49.7526478730976 | 51.9421032049606 | 52.561573697155  | 54.720204938924  |
|         | 60.2276476399612 | 45.3894119568143 | 46.29198852834   | 49.4786466722535 |
| DSC3    | 42.466333667839  | 41.9894412416874 | 38.0958223740111 | 40.3691324547049 |
|         | 44.7829632472754 | 48.260931742163  | 41.1886975241176 | 53.4109882045447 |
|         | 36.5474283500601 | 49.8393069675192 | 54.3554233228353 | 56.1136936405786 |
| DSCAM   | 48.0201377454632 | 46.1074305700679 | 41.4534762662066 | 45.4977402232805 |
|         | 45.8749253192609 | 44.4367387274922 | 45.6042625176633 | 49.7748385529588 |
|         | 46.8873421271259 | 46.6099721451275 | 48.783481283579  | 45.9132137835627 |
| DSCAML1 | 41.3387790895716 | 39.8695929627783 | 41.6079958749402 |                  |
|         | 36.3604951341921 | 38.5512429290626 | 38.1169703906207 | 39.2533668167483 |
|         | 44.1311654985682 | 35.4332080966594 | 41.5435611403119 | 44.7926323492519 |
|         | 38.9496515344837 |                  |                  |                  |
| DSCC1   | 46.8954576545929 | 52.5380506348717 | 36.769073068743  | 36.5393857306744 |
|         | 53.3086645804786 | 42.8598805316863 | 47.8947595316832 | 35.1738399826814 |
|         | 36.2733735494625 | 38.1042454705119 | 43.0971787292711 | 38.3291713594599 |
| DSCR10  | 43.0001432913058 | 40.8880530359822 | 46.7508829977587 |                  |
|         | 43.9282059368202 | 45.1137938810047 | 43.1826328292558 | 45.223075311113  |
|         | 46.0633179231318 | 49.3780606970538 | 41.0057887014368 | 50.4740079109854 |
|         | 45.0985088502363 |                  |                  |                  |
| DSCR1L1 | 37.8386378737561 | 38.4330755397458 | 43.1931731665131 |                  |
|         | 40.646702696033  | 50.3713170502557 | 39.6251842352088 | 51.1541843174981 |
|         | 37.5511560880902 | 44.4395580493118 | 39.5637454855233 | 47.7535797917441 |
|         | 43.0930293831497 |                  |                  |                  |
| DSCR3   | 142.309369995384 | 308.841311505431 | 242.503720442197 | 289.716911324484 |
|         | 309.022069786139 | 206.559526386642 | 240.841214170409 | 120.552647575158 |
|         | 171.191059267941 | 165.42634596698  | 136.482957391332 | 206.41879845205  |
| DSCR4   | 40.0557788909923 | 38.1312950900467 | 38.2280071951674 | 41.1886975241176 |
|         | 36.3390947880186 | 44.8872784170036 | 38.6243997507646 | 38.8495095797881 |
|         | 38.9006788676407 | 45.5776159432079 | 43.844855336215  | 38.4330755397458 |
| DSCR5   | 43.5710871617107 | 40.9731067463382 | 38.9790184198145 | 40.5484717678957 |
|         | 36.6354013629791 | 46.8954576545929 | 49.1067959632109 | 34.1806289878747 |
|         | 35.6139301508335 | 40.1179210534118 | 46.2560238004757 | 45.8546719310325 |
| DSCR6   | 43.6706764143908 | 130.615540145155 | 54.6051538001037 | 36.0481934423077 |
|         | 207.380865650247 | 61.4944752562671 | 412.421643885499 | 97.9497090233081 |
|         | 265.176790020229 | 65.6721629145797 | 60.5608545741456 | 183.526640731647 |
| DSCR8   | 44.6231541342    | 43.5599890586394 | 40.8860076320216 | 39.066284740632  |
|         | 42.5435283762933 | 40.800866389165  | 42.3074504864935 | 42.6008809597607 |
|         | 43.0496526069072 | 44.9603714724456 | 42.4956274276424 | 40.7063426028871 |



|        |                  |                  |                  |                  |
|--------|------------------|------------------|------------------|------------------|
| DSCR9  | 43.844855336215  | 44.8529259387308 | 36.8730514568925 | 41.6564075217517 |
|        | 44.9936360641969 | 39.3841861812262 | 44.9863726205428 | 34.806104801006  |
|        | 38.3418933808844 | 38.0078357808393 | 37.1059647239814 | 36.8690774823319 |
| DSE    | 114.935101645207 | 62.8315857560764 | 63.8740412329753 | 418.693470287372 |
|        | 68.8570376191283 | 138.23147386089  | 81.8868841896039 | 71.8613906497084 |
|        | 56.970501040174  | 92.1725548553384 | 84.8084949516218 | 108.616118600231 |
| DSEL   | 45.9090659324223 | 42.2577689927563 | 44.6032218589199 | 43.26160898693   |
|        | 41.2740822675592 | 44.8872784170036 | 40.8600431177315 | 41.599960574499  |
|        | 41.8994956106406 | 41.2665909203775 | 44.2925355984056 | 41.2870505273664 |
| DSG1   | 36.8072833828297 | 35.4484652445078 | 39.3709357615493 | 42.2496337895968 |
|        | 39.6535880152834 | 36.8059561571675 | 38.0598374201407 | 38.956280281655  |
|        | 38.6322728994674 | 37.0320432433314 | 36.9060997041453 | 33.5578650644246 |
| DSG2   | 72.4966502412724 | 121.542387231625 | 232.879882989322 | 38.0958223740111 |
|        | 50.6470461863549 | 43.5752393599169 | 99.7529382840954 | 103.366147685418 |
|        | 135.323750661937 | 58.115198353247  | 97.4829901136163 | 213.309547409053 |
| DSG3   | 37.1485601150873 | 47.9665737016961 | 73.4122412764173 | 102.483081702338 |
|        | 36.3390947880186 | 36.3845892764084 | 42.1607322031054 | 73.8374823243007 |
|        | 91.5370872909881 | 52.2256177934134 | 40.4504608195666 | 47.6040671292013 |
| DSG4   | 40.0557788909923 | 48.9899488302637 | 56.0477607422828 | 51.223859150798  |
|        | 42.0709558258414 | 50.8533737532786 | 39.6535880152834 | 40.831207953647  |
|        | 49.0986627051784 | 58.2818491355907 | 50.8826620053386 | 49.0655215909632 |
| DSN1   | 86.2021418088902 | 77.8946473414547 | 79.1649337367773 | 85.5959901987745 |
|        | 97.3188285021124 | 69.2685201884906 | 151.621572940457 | 118.736188485344 |
|        | 97.9586375307737 | 57.6791750431251 | 65.9273663561152 | 64.650642183463  |
| DSP    | 403.92758879201  | 106.521012342668 | 56.2937283136959 | 53.0284011078097 |
|        | 48.9627346956003 | 48.7019915522206 | 78.4937314423253 | 79.2185250088688 |
|        | 149.856848496725 | 74.4365426051588 | 72.842552380479  | 71.4197504261453 |
| DSPP   | 40.4639532172338 | 40.2493681589104 | 40.4882741869718 | 37.651298468202  |
|        | 44.0451487108213 | 42.8598805316863 | 39.4600924554505 | 35.3608605269276 |
|        | 37.0126425326534 | 43.401782064778  | 41.2598458726002 | 39.7411455670172 |
| DST    | 46.5728197403493 | 55.3864000014316 | 48.9775486706613 | 41.7243656302479 |
|        | 46.8039881499971 | 46.554154914004  | 43.7617721656171 | 50.7855742231932 |
|        | 50.280793313765  | 67.7831020218081 | 61.5144360539876 | 73.5950442915143 |
| DSTN   | 448.383843915421 | 543.268021785502 | 576.367042159347 | 367.158502379417 |
|        | 476.653723741096 | 2294.75523373329 | 596.384327208699 | 547.729200972776 |
|        | 333.731080636948 | 1448.17151189672 | 1275.78715071615 | 1679.12630849964 |
| DTD1   | 88.7928773498158 | 146.046179302584 | 160.605530211736 | 132.52749757795  |
|        | 179.994715581707 | 138.12608134713  | 227.361044585582 | 138.170787392253 |
|        | 138.50445813694  | 101.693848821246 | 130.775349446374 | 117.520762118299 |
| DTL    | 56.0477607422828 | 54.6089451252049 | 59.4431489877328 | 45.1944222548351 |
|        | 80.1294564809102 | 44.7804080899431 | 59.3549213146532 | 64.7318794662958 |
|        | 65.7924490713262 | 40.8049408996274 | 38.4689132737495 | 39.3575468494941 |
| DTNA   | 48.8333989709933 | 50.4487395010341 | 51.4704882732949 | 59.6804124924694 |
|        | 45.9104478407175 | 230.486681581762 | 40.7340599105623 | 42.6450179841129 |
|        | 50.628152951493  | 56.2508140932179 | 64.2690842803282 | 85.1718404558939 |
| DTNB   | 118.762101740563 | 52.2501726671381 | 69.1938570643524 | 57.0629653735694 |
|        | 56.6951078698291 | 51.0506441018166 | 121.737071786167 | 111.714563124738 |
|        | 89.6736229308069 | 101.463033319045 | 95.4841914842335 | 73.9986015964321 |
| DTNBP1 | 81.2850357499192 | 56.4978377936863 | 61.7572675712557 |                  |
|        | 81.4621222177298 | 66.8129352840907 | 81.1761078123004 | 66.7826466218147 |
|        | 79.2701322339022 | 67.9667104519753 | 71.1607965028029 | 66.7759319948677 |
|        | 66.1334450017707 |                  |                  |                  |

|         |                  |                  |                  |                  |
|---------|------------------|------------------|------------------|------------------|
| DTWD1   | 73.6362523983338 | 67.8688083153991 | 53.0290605707162 | 72.8120269375546 |
|         | 69.236458110243  | 113.6408244935   | 68.8005532048281 | 63.287067794195  |
|         | 67.4775348162369 | 68.6095266659765 | 66.3481553496766 | 91.4786089554886 |
| DTWD2   | 353.868749867979 | 191.141778714144 | 209.438270055157 | 342.643344197936 |
|         | 162.424734330982 | 116.900364583878 | 256.302432791187 | 667.583623414832 |
|         | 153.237127853072 | 450.515644056585 | 469.893430869091 | 357.574415292533 |
| DTX1    | 47.8249696958403 | 43.3458769998118 | 40.301483914446  | 45.7397504535169 |
|         | 40.6723334103791 | 43.4681646416585 | 38.2933870238743 | 46.8954576545929 |
|         | 42.5406888281114 | 40.5090849993014 | 36.0481934423077 | 45.0035308952466 |
| DTX2    | 216.744244428166 | 177.133999361532 | 175.550329937952 | 224.509915754308 |
|         | 192.171116215791 | 113.839604953506 | 162.160380044249 | 186.325752658912 |
|         | 310.821299796803 | 156.770274308736 | 205.24499293304  | 169.790843803064 |
| DTX3    | 101.81885073944  | 53.2841144999258 | 72.6731815563159 | 53.593974682612  |
|         | 80.7321212028516 | 92.6036872789676 | 78.4937314423253 | 116.852483297949 |
|         | 77.5480089703916 | 99.6265783263109 | 123.368987753537 | 72.8306652548968 |
| DTX3L   | 54.931538325692  | 52.8796369426118 | 49.9256753636167 | 53.9517841438975 |
|         | 49.5666074434383 | 44.9896851005259 | 46.1634822993009 | 44.0390019242862 |
|         | 55.6617952786921 | 41.2276963324981 | 40.9157352260901 | 42.357910063876  |
| DTX4    | 36.6480005877129 | 42.5269793679335 | 37.4642807402741 | 51.3851157261451 |
|         | 49.7235523248653 | 42.6575535390785 | 38.5066108855005 | 42.8482181313226 |
|         | 45.8325181856483 | 40.4136535208406 | 40.2649309204478 | 39.3575468494941 |
| DTYMK   | 39.0620487644635 | 37.5469247328848 | 40.8420925848403 | 38.8495095797881 |
|         | 43.2484996523549 | 40.040778349137  | 38.7337086062875 | 41.6466169548846 |
|         | 36.6312676076142 | 33.7883338848419 | 38.6662194645633 | 44.7401523707775 |
| DUB3    | 43.4626049853157 | 42.3550738181144 | 42.7303139017786 | 41.6564075217517 |
|         | 48.0234896130991 | 35.4142595025086 | 44.4639405506967 | 45.8669209716694 |
|         | 38.9006788676407 | 40.1179210534118 | 38.5668610487033 | 41.0657892043496 |
| DULLARD | 108.400712514743 | 97.5849495690144 | 116.426770366736 |                  |
|         | 122.702789229752 | 91.5258329186709 | 98.6108785181637 | 86.0796981361148 |
|         | 79.9597944271831 | 89.5239792174887 | 105.598516887691 | 111.071209057746 |
|         | 105.74849082793  |                  |                  |                  |
| DUOX1   | 41.1914475733743 | 86.1924491308234 | 92.6036872789676 | 42.1607322031054 |
|         | 59.4236178078244 | 45.0241191707651 | 67.8919712859031 | 53.6887223745125 |
|         | 78.0133696753253 | 207.710354513208 | 120.618530729822 | 140.309952483162 |
| DUOX2   | 37.7384958256497 | 47.765848710116  | 96.7948977485109 | 45.334106390212  |
|         | 39.9697332660833 | 45.6129956328415 | 46.7100796279384 | 46.3685439301234 |
|         | 47.0804681460898 | 46.8954576545929 | 41.9083581529276 | 67.4197263416701 |
| DUOXA1  | 43.0930293831497 | 111.248876636045 | 165.029434090892 |                  |
|         | 39.066284740632  | 54.0126916508417 | 39.3841861812262 | 144.863548409034 |
|         | 81.4881766238989 | 89.5239792174887 | 410.058119360034 | 239.117228656704 |
|         | 183.526640731647 |                  |                  |                  |
| DUOXA2  | 47.3791873993182 | 51.9421032049606 | 235.195902632101 |                  |
|         | 60.1837189855762 | 44.0451487108213 | 54.2503023961401 | 74.2690269784394 |
|         | 54.6067620335514 | 64.0541263553251 | 48.4890615340603 | 37.9230440150891 |
|         | 103.071727621257 |                  |                  |                  |
| DUPD1   | 42.9104454767916 | 41.2598458726002 | 40.301483914446  | 42.9358255168086 |
|         | 39.6535880152834 | 39.3841861812262 | 41.706879587091  | 41.8417024632349 |
|         | 37.7384958256497 | 37.3179578037963 | 37.2018803984555 | 41.5536168238478 |
| DUS1L   | 110.048921728774 | 145.694779669933 | 101.131391476546 | 66.9218519793499 |
|         | 132.684895918889 | 71.3932787152381 | 149.551650453179 | 89.140025661759  |
|         | 111.939677225005 | 96.9051967257119 | 105.589475270494 | 78.0006681166995 |
| DUS2L   | 117.20232751191  | 154.067791946816 | 237.359267889848 | 117.228320608065 |
|         | 180.100430567626 | 102.980622026276 | 310.900527198512 | 149.330073823683 |
|         | 173.476817564711 | 199.970127219451 | 302.588009553875 | 150.801729138762 |

DUS3L 126.682296930289 154.355197155161 190.675425748381 139.101561420631  
326.303950252592 195.654315886452 157.843337785472 123.219313750907  
275.061444728555 149.173801572239 210.485586903711 151.975559850216  
DUS4L 90.4512650366645 91.1741538903522 102.607924735378 67.8978240198575  
134.713725350463 86.9709077763908 107.748050894857 112.211717641877  
118.155986485411 91.9185612536409 87.4273245333478 82.0869179287671  
DUSP1 2992.62035058532 4784.36905964712 2488.32876359853 12125.3293116195  
1094.91235708087 6027.02412617194 2697.96877833185 3575.78813099057  
265.728967648382 1914.9556343048 3001.25236839028 1917.90025587049  
DUSP10 60.394307846869 71.334759229964 57.423873475544  
105.34055372228 51.5338331947847 51.3438109941698 52.20169560459  
51.9819543312733 95.1423940686828 45.9301227940101 47.8284278211109  
44.5432192783161  
DUSP11 174.492066109537 141.370796803908 175.508659149068  
134.646159826262 176.936216428226 129.909461876076 142.03031230486  
152.920586451578 170.150808455621 127.398722392954 144.18700333025  
155.6723334711  
DUSP12 356.318517117856 284.105466865264 323.295794446334  
171.238235624104 331.239629083778 232.740032714891 270.036719921343  
221.325534445978 261.326713935356 176.506718222092 205.346264347637  
210.255784687052  
DUSP13 44.2350046179299 41.4123755032424 43.2721716572958  
41.2507419031133 41.3387790895716 40.2851212785573 39.9361851865743  
40.7826380785043 40.0753122697556 43.7927887844247 45.0926028738813  
43.2177497174408  
DUSP14 103.139459009593 101.277664841914 97.4515987591398  
84.8948024208923 172.349874473605 111.760213205992 167.229755109155  
159.727829541783 173.891042920642 124.362644216178 97.1271615802556  
149.899176549323  
DUSP15 43.7105673651665 41.159706131351 37.8386378737561  
38.4571887275378 39.3866822630357 43.2805590023412 42.3074504864935  
38.956280281655 41.0381860307445 37.3179578037963 41.1367478979484  
38.2795150354677  
DUSP16 65.3531590366085 97.3813557754832 75.0377156190383  
79.4528447794527 100.90948905426 62.843734579668 92.6545309624315  
157.856158440506 84.673375308972 99.6946103680372 106.771536005741  
110.731862140996  
DUSP18 89.2913927776683 77.4046818339539 116.080897948094  
89.9284109077375 58.5450868286167 73.688423848106 74.7534423194688  
146.892027926888 127.345094323724 118.600699776727 97.4062608315831  
108.299918384297  
DUSP19 3869.93390477952 1855.0119962662 1963.91365010531  
3088.44063817936 1390.12380748446 1395.33665255999 2978.46032143413  
4406.55576617324 1421.44237064813 4015.88651424568 3966.51586153125  
3114.05035137552  
DUSP2 58.7404123614695 324.936044300546 135.323750661937 161.48562926756  
58.1242391848692 50.6360662655392 109.615289274998 62.1934012861178  
64.2174369755376 574.847203528544 155.050936910986 72.0334593545916  
DUSP21 41.2424637338424 45.4882438975269 42.7303139017786  
43.3078542962968 41.467005949568 42.357910063876 49.8281348927244  
38.956280281655 42.7150227340364 41.0057887014368 39.3667161654772  
42.4607795638552  
DUSP22 322.371597171026 137.785462971848 235.315897087189  
263.068504548549 185.72957253374 272.930242946726 115.801367301965

177.494605794577 135.490875023792 201.875082892488 203.334053441063  
 223.040734249612  
 DUSP23 545.514314651238 568.371815312895 1030.31910195147  
 751.953794043451 912.757335169259 534.629009719855 931.401929277001  
 585.054570630252 1033.99699402259 684.865133028228 754.700295017212  
 598.970109654466  
 DUSP26 63.7818442618767 67.5417980425932 56.4779645313958  
 66.9218519793499 56.8307116636372 57.8944021095265 61.8571521441451  
 58.676230030835 65.2125527940945 85.8795177524168 82.5225075943931  
 69.4383198054368  
 DUSP27 38.0089018744739 39.3999056968598 44.6032218589199  
 36.4038860800164 44.9384441371181 41.6178506967511 39.9519547348106  
 40.7311497914871 37.8631570409126 38.957687788868 44.553780984244  
 38.8964578286293  
 DUSP28 116.547937420457 174.088328509793 134.725028732282  
 136.392873701653 78.7320333941149 126.017900743748 131.258204302177  
 109.922909644299 131.859371655356 124.815448107572 139.204639906937  
 126.115065200084  
 DUSP3 623.574706535278 292.47671022688 332.060941890092 647.868022835702  
 304.577891085373 1040.102982885 218.354538624978 622.435313940734  
 270.600852806342 589.685739519627 825.558929673308 864.302844775203  
 DUSP4 46.8141313516997 67.6767845246581 75.1853590860646 64.0903425729408  
 48.3287893866569 41.0012755104374 50.2016912396771 63.8008894786105  
 46.9739160257217 68.534940191185 79.7691160370015 53.1491634301682  
 DUSP5 430.618167106529 1099.52344340557 376.141477833569 624.954583057431  
 566.318259999405 330.892010103508 444.169882251299 2712.36664370642  
 231.859167242606 294.908371819124 431.864508795316 698.350485654135  
 DUSP5P 49.3463416794995 43.7644428186265 40.301483914446  
 37.8129870676592 34.9428206949566 39.066284740632 45.223075311113  
 41.5934628038429 44.8003345643334 40.2112371512838 36.2435874904689  
 40.6614700944853  
 DUSP6 79.8844295847317 109.581139823852 140.030757545662 102.880267177687  
 64.3571664944642 81.6472320169489 62.2948511451314 120.142759111608  
 95.3754438202863 50.6486940895674 77.523734787944 90.0942781313264  
 DUSP7 40.5654775358427 45.4882438975269 55.5567699051046 44.7980740332174  
 44.9936360641969 38.4330755397458 39.3585350448719 41.2551966132486  
 48.2123120250343 37.0320432433314 41.0808257270221 37.4554876386402  
 DUSP8 51.2851682978581 72.7987593815919 59.7483827511172 49.7350276169552  
 64.193536444915 58.7404123614695 46.0228732507872 50.1833483241864  
 47.0804681460898 53.1993028936883 71.2370255410834 66.9239565096247  
 DUSP9 44.9896851005259 52.1062000766427 32.9174234020987 43.9282059368202  
 46.7508829977587 40.040778349137 38.941855825269 38.5457716679071  
 43.1805016690297 45.1569741609597 43.1931731665131 43.7672102682067  
 DUT 72.5752072120178 82.214837116747 62.7053729334675 54.7231416857164  
 81.929796716054 75.8976034525022 113.322929203297 75.9659252679925  
 123.597489107285 78.4428909886495 72.909783842776 74.4365426051588  
 DUX1 41.5421429082231 44.1239711172417 43.8495248991589 40.3180310664156  
 40.8873907150245 44.4619248757502 42.4939802311136 41.5464765641928  
 37.7384958256497 39.6719190054379 46.3370338074996 40.1700117452801  
 DUX2 42.1537476443423 37.4540772310118 39.8299340037009 39.6292788039793  
 39.3667161654772 38.2293008890613 41.4742337714895 44.7044140979108  
 40.5912213523345 35.8304004211528 37.9946685306274 43.2776458914333

|          |                  |                  |                  |                  |
|----------|------------------|------------------|------------------|------------------|
| DUX3     | 42.442231667357  | 33.6902293666089 | 39.991353369336  | 42.8235313007746 |
|          | 37.2567512265363 | 41.0582900711341 | 37.9430145836712 | 37.33030683349   |
|          | 43.4656637536244 | 45.6868589181768 | 44.7926323492519 | 43.1805016690297 |
| DUX4     | 36.064718696392  | 35.6013646758709 | 34.9303524605169 | 36.6501141438378 |
|          | 35.3930760356466 | 35.2067831864574 | 33.8558232866797 | 38.9271399577966 |
|          | 35.161618680127  | 37.1685072112618 | 36.7283081422707 | 35.7451401627836 |
| DUX4C    | 38.1169703906207 | 40.7952353240579 | 43.3085358214154 | 49.3654837541353 |
|          | 40.0599807618105 | 39.132725377815  | 42.8684958525042 | 43.2551508830106 |
|          | 44.2607789091176 | 39.9948390976317 | 40.0766543123257 | 39.7411455670172 |
| DUX5     | 38.0089018744739 | 40.0527893189096 | 42.8270038153139 | 43.3078542962968 |
|          | 33.4316681623175 | 39.4953494583071 | 36.4098694708483 | 35.5798430594271 |
|          | 36.6312676076142 | 34.7308008643142 | 35.9563099719284 | 37.0953622406687 |
| DUXA     | 37.2474303302343 | 34.6306468196142 | 41.6079958749402 | 37.4223289687135 |
|          | 36.6354013629791 | 39.7394181011603 | 41.3594868055879 | 38.745552403895  |
|          | 37.3600014814388 | 35.6208308220005 | 38.079222289614  | 39.0536056496869 |
| DUXAP3   | 524.451156145427 | 324.658458599373 | 331.885872312948 |                  |
|          | 538.153124145211 | 255.483653108786 | 233.577690223567 | 461.83420090894  |
|          | 849.412637017524 | 221.76904201992  | 701.168333137671 | 682.479411898549 |
|          | 542.901822331329 |                  |                  |                  |
| DVL1     | 51.7098181032862 | 59.3709786862962 | 51.6558970571712 | 42.2655533936307 |
|          | 66.8288956287896 | 52.5799250974039 | 48.260931742163  | 45.4861719648925 |
|          | 52.8190882379316 | 44.0527419856743 | 43.6919270353542 | 47.3716857595991 |
| DVL2     | 109.251112569215 | 118.251739134889 | 108.616118600231 | 102.971363152434 |
|          | 117.893268074013 | 134.554839076558 | 169.168332370229 | 97.5962784863854 |
|          | 116.287075019475 | 163.360824752796 | 144.771861156788 | 104.192417269189 |
| DVL3     | 116.426770366736 | 132.24963384417  | 178.738800467958 | 102.365615739399 |
|          | 215.033807819308 | 132.985150338484 | 95.2218627805387 | 122.748811531184 |
|          | 136.736085245679 | 126.470889051684 | 131.68956899407  | 141.255712367708 |
| DYDC1    | 36.4564050256915 | 43.0227387991135 | 40.0998167098057 | 38.1421709520616 |
|          | 41.5407238526121 | 35.9305494063137 | 42.3194600586894 | 38.3269307390572 |
|          | 37.3600014814388 | 38.0540928703622 | 36.8282383070068 | 34.3409660445447 |
| DYDC2    | 42.7150227340364 | 43.3458769998118 | 44.3344900481112 | 39.7411455670172 |
|          | 41.2740822675592 | 40.040778349137  | 43.6753843488695 | 49.7309743973184 |
|          | 48.9931786790166 | 36.6893251782922 | 48.6184776976167 | 49.3087627580849 |
| DYM      | 208.504992019122 | 287.363928615517 | 250.359859946258 | 280.239058266018 |
|          | 136.582966744378 | 396.63268714181  | 215.645475520124 | 198.951182954651 |
|          | 407.161973433666 | 226.970981973829 | 205.346264347637 | 304.258586051126 |
| DYNC1H1  | 541.105845300009 | 318.920760335454 | 314.458148321064 |                  |
|          | 372.982648892131 | 339.262360833465 | 377.221676837377 | 374.601792595646 |
|          | 804.592753722875 | 478.799250340246 | 445.307046237791 | 461.83420090894  |
|          | 468.153823329361 |                  |                  |                  |
| DYNC1I1  | 72.4094549259929 | 113.491158368594 | 39.0775870687758 |                  |
|          | 41.1886975241176 | 80.8238125943267 | 315.186937216422 | 72.8653205184014 |
|          | 59.0262390168156 | 78.5174639327946 | 130.812376632261 | 114.389392280707 |
|          | 110.223625398261 |                  |                  |                  |
| DYNC1I2  | 488.183286350725 | 533.820505121067 | 579.482255191456 |                  |
|          | 404.86512250958  | 475.466074293565 | 644.368005872231 | 350.796638646601 |
|          | 431.353025968649 | 352.997455210484 | 331.001195453225 | 446.613670519745 |
|          | 552.480471244789 |                  |                  |                  |
| DYNC1LI1 | 43.3638918705225 | 47.6914221838216 | 42.5406888281114 |                  |
|          | 51.949834638817  | 47.4548471240051 | 53.8461734834857 | 47.8947595316832 |
|          | 46.5717043290731 | 40.8970401536578 | 50.22432299342   | 45.6348103033479 |
|          | 53.2046867327331 |                  |                  |                  |

DYNC1LI2 1473.52943897204 927.61341837276 1051.58050264114  
740.709094645073 439.664256107097 1771.43541011426 1059.63540694644  
2323.81110653289 830.295872113419 1615.83220398811 1296.28036613191  
1416.47763911039

DYNC2H1 47.9175508887533 45.0115870036541 44.4311655729487  
45.334106390212 63.4753448572245 67.3469281984384 38.941855825269  
42.157627240486 57.7865070833351 45.2556760873335 57.115361349315  
59.2035499250243

DYNC2LI1 67.7280831060202 58.3912728421768 82.0925058822176  
49.4786466722535 64.447308523693 75.7502062965698 72.5075777230597  
67.0120793767211 71.5948944013406 61.9080950559794 58.037539503209  
77.4307558516809

DYNLL1 1282.9181829891 1601.52194699063 1459.69929955338  
1077.94530110976 1813.65521720537 1468.75291542154 1430.73068989193  
1184.75786736273 1430.73068989193 926.61614755153 902.691776563423  
1333.01876209753

DYNLL2 146.658116519622 173.434174644937 163.38302606725  
141.423857667761 207.540972220982 143.607457611143 294.090159716249  
218.701583105141 258.446095955014 105.29989739819 133.86254468037  
120.483677329061

DYNLRB1 396.167219131922 347.750020791938 320.13475752314  
302.012602514613 252.870708814507 445.307046237791 488.089090043145  
337.736535374405 313.399524593316 348.862367731887 355.568857981155  
445.016226732679

DYNLRB2 66.8544766980562 43.5873188565519 53.6837370963602  
51.5913529948887 41.7929491793697 53.4466111440611 50.8388984085636  
51.2623287419357 62.1796792097014 54.7827221235949 54.1963147679251  
57.8111054584154

DYNLT1 806.827205415602 621.012072500314 623.574706535278  
603.737787922337 396.261110334324 478.566247444176 630.53864514662  
495.705224781189 492.902027204364 370.088974562672 392.898761909406  
669.597878196875

DYNLT3 159.52633805025 161.156612172544 118.556124582201  
131.955454394903 81.6099927983382 186.450759425396 194.189674572424  
241.557912972813 162.000275136397 97.3870880869036 125.446628066221  
156.242688079359

DYRK1A 75.949657568749 93.1668080716761 117.626009607247  
110.009834478125 108.718422641679 103.179198287911 81.454335582503  
90.8236750745974 117.520762118299 72.5516795240251 97.9806802695685  
120.92335773864

DYRK1B 67.8208976798364 66.0147097736612 53.0290605707162  
46.3919862398545 61.6452971581503 51.1621379498014 99.4633962228768  
101.086264355915 63.5195937348531 95.0026207727863 79.0940380276977  
46.6681271693877

DYRK2 88.9038123445083 123.114162330406 105.726287089142 112.707612911654  
86.9816932158186 75.6614221167993 147.557451530784 161.817972012879  
127.708268637068 103.913834330352 101.494432845825 103.955842514553

DYRK3 47.4167233775693 45.4744187174325 43.0971787292711 46.1673159982664  
44.0060504971009 50.543526404059 42.4393920571519 51.4749724393807  
41.8225292427334 43.2484996523549 41.3122147844752 41.809704036355

DYRK4 119.167027972122 155.59062961332 156.770274308736 207.087723777954  
133.151333210366 194.985223342082 169.859588818306 129.091447141381  
355.67721196018 190.77754486426 177.602690452814 207.741669973713

DYSF 179.040571908629 124.490684428024 199.007437365676 349.589955244523  
94.0777119695783 257.711912004 111.025105784166 102.717305041352  
53.1249776278067 160.53293875611 157.189139558365 80.4404044229341  
DYSFIP1 38.2496050953547 44.0409178714232 39.7697110924474  
48.9944486068347 45.1137938810047 37.9951997351435 41.0871827071116  
42.1860813954352 44.9645354363967 44.7958122466628 42.6366765186182  
46.1088006335399  
DYX1C1 37.8830265336755 39.1982470626863 33.8015914967864  
42.5269793679335 44.1070537445005 46.0867976914262 40.4359177791566  
41.5817737564592 41.7627910693483 40.9506062495231 41.7272875295469  
43.9541718254769  
DZIP1 40.6559419616644 41.9455842688118 40.0998167098057 42.2496337895968  
49.1263312877155 56.6172748471831 41.8751578329365 43.4885245598939  
43.5669306063196 43.401782064778 43.401782064778 39.4830039788612  
DZIP1L 47.3791873993182 44.4411734611229 41.6079958749402  
43.074472921841 43.004943518025 45.1873487463472 42.0605906240248  
50.7364620410977 40.2274522635576 58.7198210787055 54.7883681830995  
53.1182952086284  
DZIP3 42.0532901689036 44.6918600441328 43.401782064778 47.3574589211166  
47.6884372645373 49.1013967533186 39.0458123429605 37.5511560880902  
45.3756389170606 39.3698811593364 46.8954576545929 48.4535991392809  
E2F1 42.7150227340364 39.5050383901884 42.640829914102 36.1562979552173  
42.269054475455 40.9506062495231 40.9157352260901 45.4757965005055  
36.2733735494625 39.7835513496873 38.079222289614 38.745552403895  
E2F2 150.031554835542 143.653706909456 98.5746416750459 119.670948133232  
144.578232267116 49.2050538150106 172.015856827154 310.860910973626  
166.553853424708 39.4710743516517 47.1477056711335 47.5025821041537  
E2F3 739.104939969224 318.690767783738 271.334774589829 418.927102569912  
975.02086340962 193.15756263121 1886.05449875658 1139.81870068001  
326.805803266857 266.323732730581 231.472806936915 276.399037769005  
E2F4 271.393858310441 350.278532614563 387.311743342483 253.802852066439  
213.204385896543 215.109108265052 277.164276391513 254.920345078558  
322.229113548162 247.843927763772 270.89711217076 244.955741307927  
E2F5 145.09364961191 290.535354193244 132.307107503819 77.3864518736634  
414.062259640915 98.403191200835 241.31366702947 95.0350792557735  
110.467254789988 59.2628513357357 78.7260936224802 88.2604063995148  
E2F6 162.37682406314 93.1067450332473 118.467231612638 94.1680559848644  
205.605413799808 100.017263238916 165.220069268347 189.650905999631  
119.095094052197 96.6833301748676 99.0095802833291 109.795084617739  
E2F7 56.3471340054074 57.6831182451733 51.1347974668251 53.593974682612  
48.5000946421718 39.6251842352088 102.499011190932 46.5717043290731  
101.954354107731 48.7414853386615 47.8988096575648 47.0130468198828  
E2F8 47.1962846565261 70.2553917409773 63.3544794716167 40.5484717678957  
57.0504111569238 44.7804080899431 45.8980298854198 39.6474008369935  
65.2125527940945 39.3698811593364 43.0016969050339 41.4508241771315  
E4F1 328.341232263338 372.982648892131 494.733185937057 210.73006676203  
370.41288705812 250.866560791828 421.791344753995 240.887877769007  
351.700618429121 397.798003824167 406.668753694984 282.646286144563  
EAF1 56.8168526942685 63.4570909617664 42.2577689927563 80.7168944828052  
56.2305155589239 43.5752393599169 63.928488869459 63.7002949745101  
60.164635768614 46.7646877499666 56.6884575165011 60.7495043977707  
EAF2 49.6241203903354 79.271901834289 56.939860285007 210.5650813431  
55.4919197421746 64.7905331739366 116.555666104916 65.4714272652857  
69.2001494999588 59.9354531144375 50.2203578628217 60.0940570991178

|          |                  |                  |                  |                  |
|----------|------------------|------------------|------------------|------------------|
| EARS2    | 66.0303950772736 | 75.0873720488265 | 108.512469038407 | 58.5406981871153 |
|          | 112.60230393988  | 58.0095518210499 | 57.8870110456492 | 95.5822406197756 |
|          | 97.4062608315831 | 81.0880833950735 | 85.8277891453447 | 96.0539709962851 |
| EBAG9    | 161.553725645675 | 232.113067048781 | 192.356440003154 | 172.451522479253 |
|          | 274.648263378054 | 181.772001042799 | 143.084029849218 | 88.9038123445083 |
|          | 143.084029849218 | 130.058147569795 | 125.588228083829 | 159.667153030627 |
| EBF1     | 55.5276281380084 | 59.0709442090059 | 54.2670850492947 | 75.2475238554276 |
|          | 49.1928206164702 | 315.065866567211 | 35.7055410599146 | 58.676230030835  |
|          | 38.9006788676407 | 168.7696164772   | 160.962078065068 | 91.8935361535002 |
| EBF2     | 38.8336427948187 | 37.3634897565502 | 41.0718387273629 | 41.0726336841311 |
|          | 38.8834538955    | 51.3886035574416 | 35.7681934515502 | 37.33030683349   |
|          | 39.7162631015511 | 39.3113207075992 | 40.6373400186325 | 40.716553247236  |
| EBF3     | 58.4920021605316 | 51.0175677516029 | 51.9214790114499 | 85.1847490113446 |
|          | 46.6397391251762 | 130.865421554474 | 43.8206425661746 | 59.8760452220989 |
|          | 42.8036731479932 | 97.2865629929716 | 83.0554837248934 | 60.4872675915085 |
| EBI2     | 105.197692490363 | 205.051252996628 | 97.7620313090597 | 1263.76838179117 |
|          | 82.1344514651393 | 221.195872577098 | 153.797431763616 | 252.243064327969 |
|          | 46.2718838939055 | 57.9141744971757 | 51.4413099192899 | 81.066448172567  |
| EBI3     | 44.0328992213727 | 68.6074516459969 | 100.305262467668 | 129.190555260332 |
|          | 60.9710783023013 | 78.730129036128  | 65.3694267397114 | 51.555506218204  |
|          | 42.8036731479932 | 44.6918600441328 | 45.310660704531  | 47.2131144508464 |
| EBNA1BP2 | 889.638287212686 | 793.570993808328 | 783.440408023061 |                  |
|          | 431.353025968649 | 1430.73068989193 | 582.017297217368 | 934.48498309932  |
|          | 866.712228831149 | 829.152040996817 | 471.046851874447 | 526.750242877914 |
|          | 644.733901442573 |                  |                  |                  |
| EBP      | 157.06144940334  | 131.413578749264 | 128.996351661564 | 84.0899854321388 |
|          | 146.840603547323 | 82.260686909201  | 187.656257079035 | 141.830305704504 |
|          | 239.023368693467 | 78.7543199947688 | 89.9227845135785 | 101.156215957297 |
| EBPL     | 254.983975710833 | 616.912306849151 | 496.163796158189 | 143.13189461696  |
|          | 603.737787922337 | 393.944898808828 | 438.50123471613  | 160.264217082275 |
|          | 443.863346367342 | 197.52820443061  | 230.117814622646 | 267.232315058148 |
| ECAT1    | 41.6354649482853 | 42.6022652963326 | 41.9666541498638 | 40.0698728584484 |
|          | 42.3685136297603 | 38.2293008890613 | 35.9058393060637 | 35.4526946152955 |
|          | 38.3418933808844 | 38.1042454705119 | 37.0180934800573 | 37.0953622406687 |
| ECAT8    | 40.148780650831  | 47.087835967892  | 42.8270038153139 | 45.1944222548351 |
|          | 35.5220586859301 | 37.9951997351435 | 41.3594868055879 | 35.5798430594271 |
|          | 39.0775870687758 | 37.5343260962758 | 44.0409178714232 | 46.7182294568603 |
| ECD      | 91.9459432547337 | 102.304422999511 | 100.937651342589 | 87.799979434508  |
|          | 95.4964717109139 | 112.60230393988  | 87.7844808613265 | 77.3367966395554 |
|          | 244.285061669874 | 69.5853093594169 | 73.5527788467294 | 92.0269919454947 |
| ECE1     | 50.6473771879221 | 53.3683962805281 | 59.7483827511172 | 63.9570596163747 |
|          | 60.2886873195135 | 48.4758590019384 | 53.1884505015411 | 54.3820590274321 |
|          | 54.7033747046992 | 46.8954576545929 | 48.7502645382856 | 52.2832912331043 |
| ECE2     | 65.6914955077809 | 52.4518619184838 | 52.4485219671976 | 51.3064929551674 |
|          | 121.668011907792 | 61.3005673792118 | 49.1067959632109 | 50.3972033014227 |
|          | 61.940656536312  | 43.7707113107752 | 45.5055402477919 | 46.1088006335399 |
| ECEL1    | 43.3638918705225 | 42.6022652963326 | 52.9111155236961 | 43.074472921841  |
|          | 69.0975200641705 | 44.7804080899431 | 49.2546642180676 | 58.676230030835  |
|          | 51.5888395924843 | 40.2112371512838 | 43.7585538437696 | 36.1647506311964 |
| ECGF1    | 657.031980628955 | 624.954583057431 | 779.996851709716 | 2225.65559724391 |
|          | 493.705301673753 | 492.902027204364 | 548.047774435177 | 843.333981146512 |
|          | 241.052700961064 | 173.780433758335 | 232.147792636393 | 210.73006676203  |



|         |                  |                  |                  |                  |
|---------|------------------|------------------|------------------|------------------|
| ECH1    | 1163.0370991733  | 1097.92519921873 | 1626.71747158994 | 710.579735673002 |
|         | 1271.62760896761 | 1436.67510926345 | 2113.73880184695 | 1621.89443989657 |
|         | 1611.35913846618 | 1287.41527826233 | 1858.94179312821 | 1362.12587130194 |
| ECHDC1  | 46.29198852834   | 52.7948184519106 | 48.8623729374733 |                  |
|         | 50.1185085888209 | 50.7116312517035 | 67.5812474586277 | 46.8613212048981 |
|         | 43.9366081640576 | 50.3745056312199 | 56.6086202928268 | 50.5188367542048 |
|         | 64.650642183463  |                  |                  |                  |
| ECHDC2  | 1868.51164332659 | 1111.13061382818 | 1239.68399088145 |                  |
|         | 244.560715635796 | 732.454837219705 | 736.405815842011 | 801.351998609551 |
|         | 1047.33749100342 | 770.715044136717 | 1963.91365010531 | 1375.14388134842 |
|         | 1411.12613289991 |                  |                  |                  |
| ECHDC3  | 49.085741080241  | 73.5534417023453 | 46.1653991089885 |                  |
|         | 153.153205095999 | 52.9433495155796 | 76.4439037944547 | 58.5087296620514 |
|         | 49.8344973836834 | 46.3203995372658 | 185.139615829489 | 218.013913036142 |
|         | 63.2113624676341 |                  |                  |                  |
| ECHS1   | 497.290172759099 | 897.198663109723 | 716.434968700383 | 307.705431227338 |
|         | 897.198663109723 | 540.304257899761 | 4093.70002166179 | 1810.67209360676 |
|         | 794.806085783439 | 766.647626178442 | 875.787532301293 | 653.089523541803 |
| ECM1    | 82.9875926750034 | 55.3477556906605 | 53.0630927250439 | 63.3006977162657 |
|         | 57.1935729219207 | 69.0530953932111 | 41.7614975630362 | 60.9801094225351 |
|         | 43.9204029310411 | 67.2811786080606 | 54.5711704180349 | 54.7953298048942 |
| ECM2    | 121.149803296368 | 55.7405934254857 | 52.1062000766427 | 69.734208465775  |
|         | 55.4345579421782 | 180.349984862124 | 42.0605906240248 | 44.7044140979108 |
|         | 45.3756389170606 | 104.504444994123 | 65.7587943905649 | 55.6351010690528 |
| ECOP    | 146.287473652123 | 102.150058925164 | 108.263706890599 | 147.811784706898 |
|         | 80.9160262677505 | 76.1991031349451 | 85.9179359178373 | 66.3558126170575 |
|         | 131.766252431636 | 57.1095070128372 | 67.8010199320754 | 85.4635831413678 |
| ECSIT   | 65.0721641331632 | 60.9311907846259 | 59.5444359507702 | 64.6945454069792 |
|         | 97.0055689383756 | 91.9459432547337 | 104.341160312305 | 89.9227845135785 |
|         | 106.165518810891 | 107.987729161223 | 131.045615546105 | 83.1874704625702 |
| ECT2    | 181.738902391483 | 134.646159826262 | 86.500678864429  | 94.5501397951415 |
|         | 211.829374574045 | 69.2685201884906 | 288.687391623935 | 218.531478946522 |
|         | 190.442443946259 | 66.0224755625662 | 61.1801493883012 | 89.1771576058145 |
| EDA     | 42.2674195935107 | 43.0227387991135 | 45.4684895894515 | 41.0337778763237 |
|         | 44.9461972583557 | 41.2067319684816 | 44.7967171120305 | 45.7476095696859 |
|         | 45.4799270968969 | 43.9135824999529 | 44.4403335343562 | 42.5267710131643 |
| EDA2R   | 40.3478825593224 | 40.7952353240579 | 53.4088637045445 | 39.5050383901884 |
|         | 44.7829632472754 | 44.2607789091176 | 38.941855825269  | 42.8482181313226 |
|         | 37.9273653326866 | 40.7063426028871 | 36.9060997041453 | 39.6352613956998 |
| EDAR    | 44.0328992213727 | 41.554942319225  | 51.3268475761593 | 38.3166554965434 |
|         | 43.3332476888305 | 30.0771630269067 | 39.5496902678788 | 42.4580504587581 |
|         | 45.0997987980157 | 66.6332042895961 | 71.0369238830779 | 57.5372732453319 |
| EDARADD | 43.9309845324767 | 99.5058761858884 | 124.841811761412 |                  |
|         | 42.2496337895968 | 78.8320129013551 | 48.9379556849582 | 80.5457814044192 |
|         | 72.0443425395404 | 89.8234189405239 | 112.760972238512 | 89.1632548302738 |
|         | 86.4937293696262 |                  |                  |                  |
| EDC3    | 120.837993273922 | 87.8681250426295 | 67.3469281984384 | 85.5959901987745 |
|         | 122.412295645862 | 81.5782824513693 | 174.179617483251 | 113.277043026153 |
|         | 95.2018660650205 | 151.175959542368 | 97.8825824657468 | 107.799236230743 |
| EDC4    | 339.418989022736 | 347.552309199761 | 465.266372824212 | 300.935346370468 |
|         | 301.525915314179 | 248.924819383887 | 432.355300448283 | 572.968592371501 |
|         | 322.509777895373 | 439.241483765416 | 442.380936516984 | 266.439343650315 |

|        |                  |                  |                  |                  |
|--------|------------------|------------------|------------------|------------------|
| EDEM1  | 85.6170780640867 | 136.140128421585 | 85.9692990407066 | 138.895316905243 |
|        | 127.60426512782  | 63.8740412329753 | 72.2577390063259 | 64.7318794662958 |
|        | 89.7862835647016 | 74.4696354388511 | 72.3822545261582 | 73.408861359425  |
| EDEM2  | 118.762101740563 | 156.65747550889  | 163.16724817696  | 215.645475520124 |
|        | 118.10944558223  | 105.814959179397 | 126.500059295217 | 123.410319693175 |
|        | 139.436084808369 | 153.901083585889 | 151.758051124404 | 145.267770598988 |
| EDEM3  | 56.2971962699581 | 53.5893790024601 | 67.2811786080606 | 54.8412943008635 |
|        | 54.4586176399381 | 53.3949676275848 | 55.3141112947345 | 54.4602501503065 |
|        | 60.3597249466312 | 55.2998422481855 | 55.6494029744804 | 60.4358541520815 |
| EDF1   | 1559.50766982801 | 938.151864971251 | 779.333013700435 | 1102.03940742413 |
|        | 900.517711546397 | 1411.12613289991 | 1485.68317899614 | 1043.26325848938 |
|        | 989.0602710707   | 1364.06060391538 | 1159.77262479002 | 1147.19483787501 |
| EDG1   | 55.7246872330059 | 65.8082111065882 | 70.2577825186943 | 82.7394574977114 |
|        | 46.4343327861696 | 87.7460859694899 | 44.2166118829877 | 49.2901038327894 |
|        | 40.5912213523345 | 61.6670071424359 | 63.2684764441521 | 80.4404044229341 |
| EDG4   | 131.277614500948 | 261.653821192385 | 195.168348967505 | 115.63300104804  |
|        | 247.676607756929 | 59.0686629877982 | 150.789911774534 | 239.070294068861 |
|        | 172.39907939484  | 157.121355906194 | 175.271140689255 | 142.585892496231 |
| EDG7   | 48.3814421939888 | 71.0935990523782 | 73.6323065529916 | 42.0102671859606 |
|        | 57.9161791762225 | 46.6872654833579 | 45.1017494688414 | 62.8885806455128 |
|        | 52.9482338979681 | 50.7855742231932 | 51.2318935933116 | 55.7067742610401 |
| EDIL3  | 49.7827734675743 | 41.6466169548846 | 38.6727842796202 | 43.9282059368202 |
|        | 38.3561682218911 | 39.132725377815  | 35.4623691645629 | 43.5544347011646 |
|        | 41.4636047919453 | 39.6719190054379 | 38.2795150354677 | 38.0452862258803 |
| EDN1   | 63.3717459766798 | 77.5737637002275 | 65.8455652907556 | 225.088911324737 |
|        | 46.0977687311222 | 62.9688525319822 | 158.862722884436 | 240.696431900526 |
|        | 50.8485682149772 | 47.1001757441025 | 48.8088340735921 | 63.4685821260797 |
| EDN2   | 72.0334593545916 | 44.1239711172417 | 79.3066495980045 | 40.1804147506786 |
|        | 56.4685270445642 | 39.2248354955045 | 55.2088411137193 | 53.3094843669564 |
|        | 124.915754138992 | 50.22432299342   | 45.8180710486329 | 44.3521099857368 |
| EDN3   | 42.2618615571566 | 37.3179578037963 | 40.244271403831  | 35.249124243346  |
|        | 39.9283177178222 | 39.9397419279057 | 39.0788811357542 | 39.2248354955045 |
|        | 35.6970528713709 | 41.1222709786153 | 39.0788811357542 | 35.0668743708816 |
| EDNRA  | 171.501864800548 | 67.6169355376864 | 62.3245608177257 | 127.986477405999 |
|        | 90.0942781313264 | 146.737709403779 | 46.9929836306816 | 102.626604917608 |
|        | 44.8003345643334 | 177.047048502104 | 200.318682162912 | 73.9192243586276 |
| EDNRB  | 47.3289285415289 | 49.0186200069087 | 46.1859571883455 | 62.9247740568696 |
|        | 57.0504111569238 | 65.2014839770255 | 48.1069139823064 | 51.7941211802143 |
|        | 43.8482802038826 | 50.7237607003817 | 53.3185097662527 | 53.2340637435567 |
| EEA1   | 49.9419897484381 | 60.6080172588224 | 48.8941062980393 | 67.7121534934164 |
|        | 71.8706847571669 | 62.1857038870283 | 59.9792284253187 | 56.6910078150745 |
|        | 85.1920126487447 | 53.6429962450784 | 59.2643906275025 | 61.4366256816323 |
| EED    | 51.462029007278  | 52.8509301396005 | 56.446325212547  | 49.1786207920603 |
|        | 52.0583273941813 | 46.5557478175976 | 56.6537562775715 | 50.3452972893313 |
|        | 60.8635925649592 | 56.685925255591  | 56.8875898013449 | 58.2879293130296 |
| EEF1A1 | 13230.9863405074 | 18219.5845257111 | 18219.5845257111 |                  |
|        | 13230.9863405074 | 11410.3307451176 | 18219.5845257111 | 11176.402230735  |
|        | 10617.4323014458 | 12125.3293116195 | 12770.8282719641 | 16661.6081002448 |
|        | 18219.5845257111 |                  |                  |                  |
| EEF1A2 | 855.602941621804 | 1055.00793806075 | 80.8400209263587 |                  |
|        | 56.2508140932179 | 3361.67247904403 | 472.982369155078 | 92.8579489575841 |
|        | 456.757277476069 | 381.426926151034 | 516.704027135707 | 950.740991182127 |
|        | 378.626656077546 |                  |                  |                  |

EEF1B2 825.558929673308 1031.4414268329 726.42773300581  
1136.88710104691 1266.41536472956 1320.7894611262 758.462554576949  
920.504890206997 841.850722284484 975.02086340962 947.656220635965  
1195.24078948059  
EEF1D 730.168814097451 684.865133028228 571.790034754076 665.122091380755  
630.53864514662 1313.92053019421 610.678132881994 519.351335801817  
555.044139654886 688.168272082335 1059.63540694644 775.931494648677  
EEF1E1 210.096514889445 186.724171695644 128.146059846414  
124.611407530723 366.228100574684 105.317399386109 163.995560004001  
111.803238196297 254.425072964926 87.1434190022564 110.973625869849  
164.511418506192  
EEF1G 1888.71160604243 2448.64580552439 4344.25847766877 1900.96666834569  
6356.05807792831 4168.41947709165 3263.05269150231 2581.34849558524  
888.56944380788 2036.72286752819 2122.39240932934 2830.73694055758  
EEF2 3575.78813099057 3749.78281766196 3399.75820494572 2745.8277126123  
5636.93532853955 5438.34345794521 2348.48320928245 4168.41947709165  
2689.80835574654 6356.05807792831 5074.07305640514 3653.59181300011  
EEF2K 158.156217755244 175.673196925527 289.05213385509 203.759116151774  
235.593721159442 561.509463439533 205.991317474325 372.525928228911  
260.15500351311 534.056256675345 360.523229691604 308.728126648231  
EEFSEC 44.2350046179299 46.1569135229922 46.5650556481721  
44.4367387274922 43.3332476888305 44.8872784170036 50.3519150282938  
51.7538628098347 56.0496524902806 49.4006068471301 52.5930185400362  
48.1627097465883  
EEPD1 57.0006212637829 49.4067286971348 44.1452943804044 62.3936376596431  
56.359578588344 73.2751502965172 53.7423898357583 54.2877981508636  
66.5298067946102 56.5379973844443 58.4816190076338 57.8111054584154  
EFCAB1 38.5648843914189 51.119812302881 49.3780606970538  
38.4208429103799 42.3685136297603 95.3300728806601 51.0013344286851  
40.2382908228517 41.2870505273664 51.7594352155304 49.532546810992  
51.8562635270111  
EFCAB2 39.3709357615493 37.2810767789306 36.1042012504758  
39.1706564265495 37.7576900881741 36.6271061451613 37.2892641289258  
39.3709357615493 40.0403898620771 42.4594149893798 39.3667161654772  
35.9604262434141  
EFCAB3 39.7576136507593 46.7591817286632 42.9104454767916  
47.9915414951747 42.0709558258414 39.4953494583071 43.5627649099623  
41.7419877611072 44.8997235283254 48.2596564318071 44.9713479185144  
47.0130468198828  
EFCAB4A 457.681756480301 670.271164195182 785.79878416775  
127.789065386943 468.153823329361 139.758805241617 347.908556198025  
421.279008280368 498.284928805673 291.867370164212 327.631923082696  
179.874652000664  
EFCAB4B 49.085741080241 35.1224289925572 42.640829914102  
39.853175885492 42.9090346219023 37.9951997351435 51.3064929551674  
45.8669209716694 40.0403898620771 45.7911932481722 41.8168470823451  
44.9070250604284  
EFCAB5 35.195364621675 43.2028319630577 37.9030782766955  
38.0365987358005 41.2740822675592 39.1650142708257 38.7803273497182  
39.6474008369935 36.7267557061938 37.0698056696061 40.3452320167286  
38.2795150354677  
EFCAB6 41.3708420203838 43.5873188565519 41.7442113152211  
47.481302504066 39.6137246345257 43.2805590023412 38.4428081526233

42.2577689927563 40.2669497398702 46.824299585607 48.1352470945488  
43.6753843488695  
EFCAB7 46.441301934328 48.8870563092695 42.3536549114165  
51.6869155634183 46.0493141231657 50.6915708372926 51.5967098638347  
47.2864663693787 56.2441895183416 46.8954576545929 45.2265319826548  
46.4499258373233  
EFCBP1 40.2543341073001 38.4330755397458 38.7745734037492  
36.264823544143 44.8897737954573 106.486195938039 57.4047331041592  
39.0620487644635 36.2733735494625 43.6033221838149 47.7535797917441  
40.0557788909923  
EFEMP1 118.854313907627 82.8652108020571 45.989212296035  
93.7260389087192 56.7784166497706 641.462632112151 43.0269218496197  
63.2068062699831 43.3118137410238 250.308866488702 226.168990555083  
268.144525192544  
EFEMP2 506.585006700107 239.229093340475 161.588263691127  
256.941243394182 270.303708972854 729.755556260103 241.486113826383  
167.25176386043 97.0348634204639 380.015934356432 349.767857026458  
267.024267633341  
EFHA1 222.336600180634 280.920208331594 268.38649000825 324.658458599373  
179.874652000664 241.08817915181 263.330471155421 239.838643553139  
216.782658096982 350.278532614563 236.791729190996 324.994911416877  
EFHA2 40.5235471987417 43.0227387991135 44.3344900481112 43.8495248991589  
43.3896803974186 40.5805725503899 46.0228732507872 40.8833572570383  
43.2163597439147 45.0155543555707 41.5668884168669 43.9366081640576  
EFHB 43.632365631458 43.1464706017434 39.991353369336 50.7046706880325  
38.9919142475596 42.9695585740813 42.1157692936428 41.6916508480321  
38.9006788676407 45.0864985243943 46.4753015651202 39.6833800000587  
EFHC1 73.8374823243007 62.1642339365777 67.0421310720934 61.7502624458447  
57.1935729219207 61.8187341713197 53.4921736109774 61.2343203799193  
58.9870089759222 72.6549171886783 55.6151308605445 71.381069076765  
EFHC2 35.1307934330047 42.8542642792862 55.7764940944098 49.1786207920603  
38.2496050953547 50.3245489035833 39.5496902678788 36.3405039629059  
39.7537274655115 46.1390887492649 42.170702295259 36.449101775775  
EFHD1 322.169157552725 96.3918711895208 131.586389151079 57.4595416719581  
92.5135737873857 273.108672916862 75.0665411373616 63.287067794195  
45.3756389170606 130.261747462753 114.979124960177 183.286063142727  
EFHD2 1103.90449800536 1442.72006787259 1247.50618540769 1824.79010714035  
1319.32406112346 686.154904023493 1896.06380611235 1907.47560253019  
1656.16581692717 1480.95754707554 1398.21942794938 1144.34555072807  
EFNA1 432.355300448283 152.187430924861 307.445116836976 100.168016285684  
227.404530886674 87.8967913380047 189.80672643731 744.080606078086  
529.650395907046 594.184150517102 531.36214636517 794.806085783439  
EFNA2 36.5393857306744 39.6123051184545 36.2683886571585 41.6564075217517  
40.8873907150245 35.8227939208521 38.7337086062875 43.4544762830742  
41.2870505273664 38.8507804383261 34.5633623842083 36.449101775775  
EFNA3 43.6706764143908 38.0226905622357 37.8386378737561 42.5664883002833  
38.745552403895 40.3357777530419 35.9058393060637 36.7460922671619  
45.0017158586743 36.4651112441576 34.7308008643142 39.0536056496869  
EFNA4 133.067727272864 80.3060865378414 113.454378667943 81.7967230859562  
143.913007288353 74.3729155936862 131.738693662183 105.589475270494  
116.76301232629 79.5488891958168 77.8220670093392 81.4165540307337  
EFNA5 33.5994525227062 42.5269793679335 40.931294690669 44.4367387274922  
41.5668884168669 44.3648993568405 44.9863726205428 47.2009420656854  
44.8003345643334 45.6868589181768 39.6403089864678 45.8546719310325

|        |                  |                  |                  |                  |
|--------|------------------|------------------|------------------|------------------|
| EFNB1  | 67.3816715975056 | 89.3342384381684 | 209.31241212773  | 91.7068354379889 |
|        | 95.7639712596394 | 79.863426244511  | 107.466490458133 | 90.2915974511786 |
|        | 217.875223856197 | 226.456072107079 | 196.267504470029 | 165.797721197832 |
| EFNB2  | 541.105845300009 | 336.679355848349 | 619.950241162173 | 181.814283147675 |
|        | 243.403622361932 | 129.190555260332 | 226.785831708938 | 349.83809766755  |
|        | 158.998384690038 | 100.413031488199 | 126.682296930289 | 96.3918711895208 |
| EFNB3  | 55.6268253440479 | 36.3110701990588 | 42.4580504587581 | 53.3967242431461 |
|        | 118.885205874725 | 44.0804700754786 | 73.6855877240541 | 52.7787010032051 |
|        | 100.178375869002 | 47.1001757441025 | 87.8967913380047 | 44.2527566343661 |
| EFR3A  | 538.427311162325 | 502.67939538729  | 378.795484311455 | 594.184150517102 |
|        | 230.554867472663 | 573.394745674984 | 168.561260174501 | 222.985386635178 |
|        | 506.585006700107 | 454.02808608679  | 502.435496018532 | 477.263677441074 |
| EFS    | 61.4416707689893 | 149.213844580441 | 99.5125674355716 | 46.4555908533915 |
|        | 92.2001835784782 | 77.2834482217973 | 100.499763255098 | 48.1591264215184 |
|        | 114.230358276599 | 90.3439862484238 | 89.2185019250322 | 70.6903168772326 |
| EFTUD1 | 78.6911549149983 | 78.4692960800668 | 58.3773276500015 |                  |
|        | 100.248038733326 | 72.0674952635945 | 73.4037256268744 | 81.6713911430463 |
|        | 79.9126192278104 | 86.3185927557402 | 85.311632806912  | 79.4832790698673 |
|        | 103.199200862158 |                  |                  |                  |
| EFTUD2 | 630.53864514662  | 472.982369155078 | 428.958127252533 |                  |
|        | 397.850286751468 | 726.42773300581  | 263.096895937991 | 578.601842980701 |
|        | 583.421166842011 | 653.089523541803 | 418.927102569912 | 419.360641528378 |
|        | 280.622184239624 |                  |                  |                  |
| EGF    | 42.8036731479932 | 40.9731067463382 | 37.6557714476853 | 50.5310598656998 |
|        | 42.7107928951766 | 43.9724628401189 | 44.7255207589606 | 38.079222289614  |
|        | 40.3316153483289 | 42.4594149893798 | 43.3085358214154 | 43.2776458914333 |
| EGFL6  | 98.7869013773721 | 83.7019398654324 | 90.1284518302601 | 71.7167037224069 |
|        | 74.7557519831859 | 85.2260422401241 | 50.0088611244948 | 63.664265793911  |
|        | 93.6464901357407 | 56.284748518655  | 48.9906383294199 | 48.9944486068347 |
| EGFL7  | 53.7079631941275 | 55.6323803479191 | 52.9111155236961 | 46.7577982595088 |
|        | 48.5000946421718 | 58.4984917725442 | 43.3262148375525 | 43.6753843488695 |
|        | 53.2735797144627 | 48.6124127998952 | 57.115361349315  | 46.917149434588  |
| EGFL8  | 48.2910530887214 | 41.8073910693411 | 48.0191002461099 | 35.9521941716188 |
|        | 37.1565984182084 | 49.2050538150106 | 36.197424053556  | 38.8495095797881 |
|        | 45.0017158586743 | 39.4710743516517 | 38.2795150354677 | 40.0557788909923 |
| EGFLAM | 69.8712342353417 | 70.8687598033783 | 115.530384771495 |                  |
|        | 80.2979179444897 | 88.1861828863404 | 65.0774755750423 | 42.5750559787101 |
|        | 51.1694248620208 | 81.588696805606  | 47.1001757441025 | 50.5499559337071 |
|        | 44.696023817801  |                  |                  |                  |
| EGFR   | 76.5505585423421 | 58.2957814921605 | 79.2525964926483 | 40.7910160811527 |
|        | 99.2898960399974 | 60.2528550551807 | 59.0457625163577 | 59.1533197797534 |
|        | 68.8353800542132 | 68.9833517108866 | 72.5559426064896 | 98.9657264176664 |
| EGLN1  | 74.3135387703106 | 65.8082111065882 | 62.0008474085033 | 82.5279746006378 |
|        | 86.033725825968  | 74.0995052892511 | 66.1940959364976 | 53.4109882045447 |
|        | 96.0838701986116 | 42.9866214102525 | 53.4088637045445 | 70.5322939116406 |
| EGLN2  | 314.281125546552 | 220.337850438943 | 189.451890957713 | 330.096171705212 |
|        | 330.814531248695 | 278.303493506139 | 332.322497133752 | 304.777565078155 |
|        | 270.303708972854 | 258.589426470951 | 240.217589414972 | 231.733564500645 |
| EGLN3  | 56.2508140932179 | 46.6996902348633 | 54.3554233228353 | 45.0798408927912 |
|        | 46.4343327861696 | 47.8636003588181 | 61.3620062177524 | 51.0724630072723 |
|        | 76.1869593072029 | 61.1851254827343 | 59.0537479001842 | 70.8546350449171 |
| EGR1   | 1888.71160604243 | 2816.7754199004  | 266.634368304904 | 1260.45604038487 |
|        | 277.993522959259 | 2045.24530722676 | 1234.59589464045 | 2791.75465171135 |
|        | 369.032450063274 | 700.477686061791 | 1718.44944271916 | 438.681666410245 |

|        |                  |                  |                  |                  |
|--------|------------------|------------------|------------------|------------------|
| EGR2   | 349.767857026458 | 434.523449093691 | 52.5353664902258 | 296.753500238226 |
|        | 53.3086645804786 | 392.51606894011  | 99.3797043236938 | 280.117410663595 |
|        | 82.8150137756969 | 56.1912096308988 | 55.9269493191353 | 49.0655215909632 |
| EGR3   | 54.4140381300469 | 63.1137861754989 | 48.7646976789783 | 76.0975301977715 |
|        | 45.6895223823001 | 61.1751736985663 | 45.8980298854198 | 58.8477194579185 |
|        | 57.678188678075  | 50.0564735608363 | 52.6960621424156 | 48.0080291106034 |
| EGR4   | 43.3638918705225 | 40.0527893189096 | 41.437237454134  | 37.7469621225553 |
|        | 35.3327761997046 | 33.7818132446042 | 43.3262148375525 | 38.5457716679071 |
|        | 43.0930293831497 | 44.1379638573455 | 39.2542963855807 | 40.0557788909923 |
| EHBP1  | 160.015674121695 | 136.377736482671 | 196.760671234837 | 109.310200749289 |
|        | 212.99813190918  | 489.622327794168 | 112.805898501551 | 165.640362974584 |
|        | 127.49459343016  | 208.804071011518 | 184.048982286364 | 204.554792089177 |
| EHD1   | 457.202737754842 | 331.087219418047 | 333.421080658854 | 979.468753716758 |
|        | 725.680256063016 | 407.818713538416 | 605.970682363975 | 686.154904023493 |
|        | 273.460165751162 | 403.796135347069 | 388.920739791844 | 312.795596385258 |
| EHD2   | 66.8544766980562 | 45.4882438975269 | 58.4137028673494 | 73.3725472767369 |
|        | 52.0583273941813 | 66.5234828659154 | 40.3302268293707 | 45.2806199505029 |
|        | 48.9931786790166 | 117.033529761587 | 81.0562186907518 | 73.2234405348435 |
| EHD3   | 38.1169703906207 | 46.4861258030402 | 41.437237454134  | 40.0698728584484 |
|        | 33.7494761745342 | 40.040778349137  | 40.6750540874299 | 44.0390019242862 |
|        | 38.3418933808844 | 47.3791873993182 | 53.4921736109774 | 39.7411455670172 |
| EHD4   | 332.230531176052 | 556.417356025042 | 342.829992044257 | 468.98857415608  |
|        | 515.216890329893 | 241.599353653369 | 664.453262499828 | 919.542051089664 |
|        | 468.98857415608  | 522.49156295512  | 494.162646055732 | 375.757961593064 |
| EHF    | 76.7820250461545 | 389.994289973076 | 381.31252208432  | 40.1804147506786 |
|        | 306.578554914328 | 80.099836448859  | 309.102633242573 | 288.508774004052 |
|        | 444.937258895152 | 87.9206275762349 | 104.486555491331 | 262.624624672404 |
| EHHADH | 54.6235981131919 | 98.2747494745452 | 75.8201286658785 |                  |
|        | 58.9168466928565 | 69.3468840908665 | 59.2643906275025 | 88.3335649692467 |
|        | 63.9110569727542 | 83.105117076029  | 48.1392888470269 | 59.4188882103773 |
|        | 74.0913177754682 |                  |                  |                  |
| EHMT1  | 53.2282811950376 | 52.4554584270038 | 52.5353664902258 | 50.4397478643191 |
|        | 50.0580547772867 | 51.0988785553434 | 55.6151308605445 | 47.2009420656854 |
|        | 49.4275543103572 | 52.5909491535773 | 53.9262634476065 | 48.1002535934643 |
| EHMT2  | 56.227813871963  | 54.0052948715814 | 53.2735797144627 | 39.1335009052403 |
|        | 62.3862792065884 | 47.417512242919  | 53.6294062560285 | 51.0724630072723 |
|        | 59.3164315859919 | 58.7198210787055 | 56.8760943789568 | 42.3152792870779 |
| EI24   | 303.93332785291  | 561.2769907009   | 499.744856832174 | 172.540737848092 |
|        | 754.700295017212 | 449.564281713066 | 518.936896882424 | 353.751797948675 |
|        | 455.774407260725 | 340.311633794489 | 467.645011859047 | 379.79657860938  |
| EID1   | 59.5000730792772 | 53.8499082625091 | 45.8844325913247 | 55.2214187655851 |
|        | 58.2780916793348 | 93.1067450332473 | 45.3597029614942 | 54.2877981508636 |
|        | 49.0986627051784 | 72.5153335566211 | 57.0154839296649 | 58.2879293130296 |
| EID2   | 93.0714382925187 | 94.5261917871909 | 93.310557793228  | 72.4834467838798 |
|        | 138.895316905243 | 104.059057437473 | 117.706922397135 | 78.0020909283414 |
|        | 127.115038236278 | 62.9205616877344 | 67.8570354010492 | 91.40570426491   |
| EID2B  | 1266.41536472956 | 739.541009338849 | 792.022171185649 | 1239.68399088145 |
|        | 511.792908607692 | 522.811631783729 | 1051.58050264114 | 1457.72260892651 |
|        | 640.407302868904 | 1640.74027400791 | 1466.88103496067 | 1069.3975598703  |
| EID3   | 39.0620487644635 | 43.0227387991135 | 36.4564050256915 | 37.29566077996   |
|        | 46.1804647841331 | 42.9695585740813 | 37.2892641289258 | 40.3357777530419 |
|        | 36.3649677956953 | 39.5637454855233 | 46.0095710163378 | 40.2669497398702 |

EIF1 936.39727542747 1421.44237064813 746.252816568691 1611.35913846618  
745.219025960188 1796.47241860175 1163.0370991733 902.691776563423  
1114.15989325456 1239.68399088145 1473.52943897204 1776.78784112613  
EIF1AD 38.0089018744739 43.4396866157171 44.9758339877851  
36.3604951341921 37.0526522140242 38.7340969861754 39.7576136507593  
36.5393857306744 37.9273653326866 42.8936990772838 37.8372168909583  
41.7575097298927  
EIF1AX 61.7551416187554 71.8156159183499 68.6704961638492  
60.2709072709358 65.4589642146912 93.1668080716761 90.4160198134865  
74.1686961093736 76.9535968101411 53.1993028936883 61.7572675712557  
68.6788460999238  
EIF1AY 78.7450149191851 168.561260174501 41.528370959196  
227.317566600324 46.0043807840705 235.075347885884 238.584514797019  
75.719886024949 119.45528139824 164.373677562376 150.262748333939  
234.232348771362  
EIF1B 121.204795052893 132.946528291039 127.694844372277 205.876395674271  
381.426926151034 250.545098051392 144.227861902786 107.232979387172  
139.905295316081 106.418690759491 163.280931300437 296.271895016431  
EIF2A 292.389429869034 471.874412428677 485.698327133705 465.887689708274  
492.710488250721 661.718946652592 400.760646547012 334.349204174886  
319.408264906288 342.559364715094 393.337170271481 669.597878196875  
EIF2AK1 957.682898193927 920.023344692409 1130.2486883492  
566.318259999405 1621.89443989657 611.776512504215 1122.44489338159  
1059.63540694644 1598.78859278229 861.729405234231 751.150916058018  
725.680256063016  
EIF2AK2 230.975122271137 402.794855141389 335.943994595615  
338.846080983216 234.873589896708 305.119894105297 517.216393517181  
797.019657306322 175.619398238068 248.414210905199 441.976123154763  
363.002913525646  
EIF2AK3 50.9381343674699 59.4908919662362 55.3812135024656  
57.4595416719581 46.7508829977587 51.0506441018166 48.6395795163502  
63.8008894786105 60.8635925649592 76.4439037944547 70.7045582269595  
65.1251519077199  
EIF2AK4 215.68113524702 130.35828139117 146.658116519622  
216.744244428166 136.04447103201 109.738537924214 176.839214683647  
358.194667053419 143.894266185526 242.966185793816 234.615033303459  
229.659465419141  
EIF2B1 252.535061916875 271.478148993789 399.80505620721  
236.851068206869 396.261110334324 340.311633794489 300.412043023998  
192.058030454066 351.039814818516 213.590067519021 264.407051461506  
298.089522641269  
EIF2B2 284.013140015092 158.349509235411 226.567000755017  
256.55408314817 369.258587948416 253.072560237983 196.760671234837  
183.66684597416 258.038442651578 193.01447006167 185.54813083393  
308.183340806373  
EIF2B4 456.757277476069 301.594300620246 354.634819362978  
270.922452389109 367.451332073134 355.495119544081 359.296873000994  
593.345148568451 316.419421649196 455.444228161475 365.860501246879  
318.690767783738  
EIF2B5 163.877163712385 174.609448758071 258.757703729905  
166.304210248623 279.632025097952 136.711122812062 159.667153030627  
220.054040993848 204.200566808626 293.410413883219 280.202284365004  
220.010492114456

EIF2C1 117.76002524375 92.5391033814713 97.4515987591398  
 104.99788782377 87.3957386451235 107.309776354951 120.96329303892  
 171.205726660714 107.222176166001 125.114613377133 101.540333720181  
 102.163854544231  
 EIF2C2 204.039190380778 326.70962514228 147.424598105182  
 369.032450063274 297.475572902965 204.477547372897 419.46223841313  
 254.519518210024 147.405190988088 164.917385239962 247.246045048229  
 183.364949777567  
 EIF2C3 45.334106390212 48.5905518770847 50.4662238169527  
 68.8167148906225 50.8875036861067 52.1408852421186 57.5955320223035  
 74.7794253940974 55.5086026637973 53.8260140375214 53.0419743379342  
 53.1491634301682  
 EIF2C4 43.3638918705225 53.565717255469 59.2012779686869  
 59.4674205670657 62.1836961153924 59.5979861826984 57.2758638871082  
 58.676230030835 70.9462008788871 68.1674425673171 55.854474649572  
 73.1008013275549  
 EIF2S1 81.8104679118753 53.4735821194294 57.7415362494584  
 76.0975301977715 63.686652234709 86.0630164348952 74.9059650336395  
 73.5950442915143 84.0899854321388 79.262977183608 72.6162848018047  
 71.8539743926881  
 EIF2S2 75.8976034525022 70.8546350449171 62.3936376596431  
 46.7577982595088 77.2608629053098 79.6895408438974 73.0433648756396  
 50.9933795450314 85.1920126487447 71.9124897002253 71.6849360818041  
 79.2525964926483  
 EIF2S3 475.159378115819 1071.64675274806 766.647626178442  
 625.805967352327 729.342532316666 1382.25775340179 711.773459577386  
 565.411298018845 781.923984640049 728.257836227637 929.862002014478  
 935.815928529014  
 EIF3A 141.255712367708 162.000275136397 136.236041346288 223.826005691932  
 166.834334710682 194.355765743782 178.306763765612 208.3497732496  
 129.252597914828 261.569542242954 199.035083736742 272.545033107746  
 EIF3B 1330.19215036764 994.404707955031 858.228943026906 663.372296297652  
 2167.91218703382 1033.99699402259 1236.32289322872 1194.10154988793  
 1578.32969650385 1132.19026676901 1103.90449800536 704.15545332905  
 EIF3C 59.6008106247114 45.5842286511645 51.9885249508283 43.4410741327254  
 68.0414563597154 59.0686629877982 39.5496902678788 50.9933795450314  
 52.9482338979681 59.4969799685856 53.4921736109774 51.3244198342335  
 EIF3D 891.080174768895 790.786577596971 1057.44729389649 876.959744461441  
 845.41973083225 1135.43644148537 1149.90692951795 1223.01485352248  
 1219.52011418558 1428.47642890543 1301.07436212673 1197.13566108661  
 EIF3E 3999.32180022337 4632.08655821299 4015.88651424568 2498.54878472152  
 2331.12401106076 4784.36905964712 2488.32876359853 2755.23573327276  
 2440.77408185413 4406.55576617324 4368.11345948444 4503.77675488367  
 EIF3EIP 706.914069768466 804.592753722875 737.604036996153  
 657.310970474676 844.431085166353 2013.08489754172 583.421166842011  
 537.841677481011 899.223276238109 888.56944380788 1245.45371155527  
 1490.1549980903  
 EIF3F 661.269882993465 1470.84169670955 1287.41527826233 875.463242737778  
 1516.33074288338 1529.52516575545 734.705859548078 816.746599467159  
 1178.52115916913 1136.88710104691 1012.0373748933 1421.44237064813  
 EIF3G 657.936229435025 1058.61208471961 1310.03307063841 865.63777294494  
 1519.01001038342 1296.28036613191 798.996494242432 755.106456358949  
 947.656220635965 1111.13061382818 1401.46625360427 953.143041145545



EIF3H 999.862452730252 1062.93431683428 755.852629128252 604.951648398924  
1223.01485352248 1369.13346566895 471.297503316471 494.300858189605  
817.631505579476 832.181997440212 850.205634919459 981.039763059681  
EIF3I 500.794458547464 672.515393219419 875.787532301293 576.140066807763  
1219.52011418558 654.682263833024 675.832363405287 1007.03747721563  
801.351998609551 472.982369155078 619.950241162173 877.316304736545  
EIF3IP1 42.0532901689036 41.0678614026819 38.6727842796202  
38.3166554965434 41.3755760434934 43.8582747295766 44.0687697278114  
42.4580504587581 41.2870505273664 39.0648733099061 49.1067959632109  
42.7782216342806  
EIF3J 97.1271615802556 102.605473054584 77.3367966395554 101.867388894697  
143.399636653204 126.128760255542 95.9298109273155 118.075168790221  
104.220256076979 73.7133884699889 77.8669914727921 112.316483867372  
EIF3K 2374.1766901821 834.14766574977 1020.75813028358 910.898566308567  
1738.00955642263 1457.72260892651 1303.33517942343 1282.9181829891  
1473.52943897204 1232.7632290973 1271.62760896761 1178.52115916913  
EIF3M 209.038077542654 398.43592055172 397.94989372796 275.096637886925  
356.628599887098 370.495645380436 222.01145815859 260.232090974645  
354.38923772101 212.00247895282 224.871193467078 500.794458547464  
EIF4A1 5018.90384962952 6258.22561934986 6186.45345364665  
6258.22561934986 4784.36905964712 4299.4451139256 5855.6498679729  
4550.56817942699 4200.38495514552 3575.78813099057 4216.69417265779  
4259.50675863393  
EIF4A2 2892.02001412369 2126.41018877615 1824.79010714035  
1337.53997230271 3217.83121827744 3361.67247904403 1580.58484708669  
1855.0119962662 2337.7738990994 4752.94498024732 3838.19449971537  
5112.4354472796  
EIF4A3 802.650020720921 1001.99175009124 974.296760034984  
1413.36279821142 1459.69929955338 724.881002237334 1578.32969650385  
899.223276238109 1343.66876893729 635.050535522135 613.060733526013  
738.059797123491  
EIF4B 958.473187253938 1379.51119430451 1245.45371155527 943.73554571528  
853.464809072841 2101.59244895554 601.611039798626 1285.49870339222  
1205.82775512007 1524.01520893763 1839.09068171097 1963.91365010531  
EIF4E 42.1537476443423 42.6022652963326 38.6727842796202 41.253645578517  
41.6383327669122 40.4779565600984 40.8617699346501 43.3729486804084  
40.8503192605024 41.4397539024976 38.5306320917724 44.4004151500264  
EIF4E1B 42.0532901689036 40.8880530359822 37.5597671487621  
38.745552403895 43.844855336215 43.7630587657205 39.2533668167483  
40.931294690669 40.3316153483289 35.4990901121893 45.7328341667151  
38.745552403895  
EIF4E2 217.065944053174 155.942366087388 136.766779297051  
173.013258797349 167.746168796779 149.691911022686 133.487946450906  
200.019523376661 288.190015621249 106.752660061588 115.962193866339  
163.20801480093  
EIF4E3 85.7983996395757 112.714318425036 92.4896666046729  
147.811784706898 54.4586176399381 324.658458599373 156.770274308736  
101.01459505339 93.310557793228 153.42135363926 152.72007888133  
188.272588632909  
EIF4EBP1 51.1740855632044 55.2182004838121 54.0536858212253  
51.0175677516029 45.4751076037511 58.9676332048764 66.0350709576651  
54.8412943008635 67.235655687817 50.4234835272833 50.3876754565799  
42.57175366709

EIF4EBP2 203.913062066149 188.042978085327 176.07173250529  
185.165420581989 193.094756585577 211.897320355251 200.698372627272  
259.958369064691 500.794458547464 236.374695859748 218.917221711155  
255.986778613019  
EIF4EBP3 43.0001432913058 51.909968572392 46.02045129728  
50.6262443356159 48.7847528954724 53.3185097662527 48.5544398725959  
49.8344973836834 53.9634127270611 59.9876575158981 54.4140381300469  
50.6141827957642  
EIF4ENIF1 115.894467332637 143.068901273486 121.120217132666  
106.035435807364 112.990752518897 167.319747725488 127.588471566929  
89.7184505543918 140.288771064502 143.563236821003 159.022432105333  
148.312100828662  
EIF4G1 346.621778258188 362.506098778318 359.465715235071  
257.662291702982 590.709061039001 360.962191673108 570.204236909398  
452.969595001684 440.93348620369 310.358667418222 471.046851874447  
288.190015621249  
EIF4G2 1152.55315876935 1712.55038816005 1683.24873205783  
1090.86617066541 1411.12613289991 1249.41227924272 1114.15989325456  
1465.08435775014 2232.61002288121 1266.41536472956 1351.49940447914  
1478.26733379357  
EIF4G3 156.382146982116 145.607100979838 187.862483922786  
205.876395674271 203.334053441063 169.554408876006 180.902423012987  
382.872356030213 170.150808455621 143.706880936186 177.460053912279  
206.857208722995  
EIF4H 653.089523541803 829.152040996817 874.419252731128 719.815240381415  
835.171475474151 1030.31910195147 698.105755081829 624.097858948785  
1213.3477481374 544.355979695242 677.481235695517 705.283979182062  
EIF5 64.120219344545 80.4822328865 134.489077146096 139.768680518677  
91.0327980861321 154.166621635012 129.909461876076 87.3634135323569  
87.8724689898823 66.9218519793499 92.0711167984454 86.3458707176254  
EIF5A 1061.61186520958 443.863346367342 628.403814060213 849.412637017524  
1191.93354266135 343.94159167652 457.097617649604 456.467726693355  
1067.08316477623 267.657143781939 883.06773454117 492.519023728038  
EIF5A2 52.6960621424156 44.3977035913759 48.3847843498476  
47.2009420656854 46.6397391251762 58.9676332048764 45.223075311113  
56.7569186600983 44.1211971585961 65.3672880026114 61.227809931332  
53.0446815750355  
EIF5AL1 46.263826584899 50.164201758929 54.9071823326024  
49.1786207920603 43.3332476888305 48.1591264215184 49.1067959632109  
49.5185112777773 49.4786466722535 45.0155543555707 47.8988096575648  
48.3648494350286  
EIF5B 147.719172115976 130.239763076999 123.077231445204 120.980558571109  
212.688298502868 178.092166249096 143.152895211088 181.093943398293  
145.28255999556 128.749209040345 117.439175394651 144.500148287951  
EIF6 351.439404852971 507.307494640785 406.500583302121 237.161912299581  
446.162602155964 254.82779318297 688.168272082335 476.421959423835  
594.611678976716 340.553073657744 353.076989769287 300.703401968169  
ELA1 39.5676051939342 40.3384318592985 41.437237454134 42.8235313007746  
38.5512429290626 45.8325181856483 39.0458123429605 39.5466975353131  
35.7973685350741 44.1379638573455 40.3452320167286 45.6692241948108  
ELA2 43.6706764143908 39.0894172982439 41.437237454134 45.5869891570251  
42.4864576619427 60.7488007939604 33.9750800030909 40.931294690669  
42.4540072551568 51.2318935933116 56.3106156221316 45.8546719310325

ELA2A 35.5179217192467 37.4540772310118 36.178547300352 39.2780515621926  
39.4693871570028 39.132725377815 43.0930293831497 39.0620487644635  
43.3744503319109 41.9666541498638 42.0750889188255 38.9496515344837  
ELA2B 43.6706764143908 48.3077814647455 44.1452943804044 42.4580504587581  
38.9496515344837 37.5887129572848 45.7452456977857 43.3262148375525  
45.0997987980157 43.401782064778 46.1673159982664 38.9496515344837  
ELA3A 39.4250105372135 39.932537801639 40.8420925848403 41.4727452533295  
43.6587492470348 42.0847226073592 42.22763273471 42.5435283762933  
42.6762317063737 39.6251842352088 41.0476065156912 40.2669497398702  
ELA3B 40.0557788909923 42.6939394537076 42.5406888281114 52.3004056941891  
39.7568367479301 45.6129956328415 46.8613212048981 43.2551508830106  
44.1519466943185 40.8049408996274 40.9157352260901 47.6938628797168  
ELAC1 53.0290605707162 53.9275079525238 59.6565330440648 51.3851157261451  
52.0583273941813 51.4931742685391 47.8947595316832 45.642304356051  
54.998510746958 40.3235655331796 52.5930185400362 47.3172462673426  
ELAC2 117.612004923867 174.275409358652 139.08163074096 115.913030448537  
157.774096599452 161.65846687852 212.353676518748 141.055218279065  
179.953662481428 149.933827818309 167.824386984618 127.694844372277  
ELAVL1 86.6655289455628 92.6608453151206 63.1450855271137  
44.1483976313959 115.408418935236 53.9517841438975 55.4004611309636  
57.8765910878975 67.591570323687 79.4916415027015 61.3529667465225  
71.2491135258076  
ELAVL2 38.957687788868 44.6918600441328 42.640829914102  
44.1483976313959 40.148780650831 43.7630587657205 39.3585350448719  
35.6825474397235 39.0775870687758 39.8873706855774 43.844855336215  
37.4554876386402  
ELAVL3 43.1267841876606 42.2577689927563 42.2577689927563  
38.0958223740111 46.1513019317765 43.0177448037924 37.7136011474903  
42.0847226073592 42.4540072551568 47.3010040326346 45.310660704531  
44.4475838947656  
ELAVL4 43.7585538437696 40.148780650831 39.2707964550441  
47.0874209746031 41.467005949568 45.1873487463472 42.0605906240248  
53.9465584609317 41.1742244762318 41.1222709786153 44.2925355984056  
41.6550823405646  
ELF1 459.182372959714 556.728676214581 529.977491403949 838.974043046676  
322.678762360476 342.475405815033 356.318517117856 255.284866561352  
425.895919304186 464.671881584567 513.57613902662 571.170643523692  
ELF2 91.7761668960824 114.321083441061 112.977333058979 130.515102593803  
120.721482177994 144.757886965525 121.650910373947 80.7664399131413  
129.179537795204 155.730834354163 127.232160404726 138.859992681388  
ELF3 788.232434009173 1296.28036613191 1183.62228577053 64.0903425729408  
806.827205415602 128.414712393554 2672.94421680196 3253.86278287661  
1907.47560253019 1001.99175009124 1211.8832855325 1850.06063216244  
ELF4 156.242688079359 471.59454368268 362.724027984972 282.035361446993  
506.672059588135 148.683947515074 323.906340044066 364.962649416567  
355.495119544081 316.373650015333 233.850715388018 269.361536809057  
ELF5 47.0940613507321 77.6653462778309 163.280931300437 40.2455972565968  
69.805066579191 46.6872654833579 136.979357314656 730.168814097451  
245.439289067575 187.923050034941 198.682422442825 107.799236230743  
ELFN2 123.521401665865 38.0226905622357 39.6451483836089 40.646702696033  
43.4544762830742 45.8325181856483 37.6036146841933 43.7396619462033  
40.6957787921451 38.4187686307607 38.3684202018524 39.0536056496869

|        |                  |                  |                  |                  |
|--------|------------------|------------------|------------------|------------------|
| ELK1   | 227.535855856645 | 160.973602503707 | 143.383133346874 | 207.087723777954 |
|        | 191.454637685756 | 160.459991480576 | 254.756894822368 | 196.389446842567 |
|        | 229.659465419141 | 140.276520383146 | 179.552011806692 | 118.376686726902 |
| ELK3   | 43.0930293831497 | 48.4497719907777 | 48.8100349749783 | 46.3203995372658 |
|        | 51.940083408061  | 44.8872784170036 | 44.6032218589199 | 45.3872406432794 |
|        | 43.8482802038826 | 42.0621425894624 | 50.1649089793069 | 44.5432192783161 |
| ELK4   | 41.1790463122372 | 45.4737296536645 | 44.6032218589199 | 42.4061338151892 |
|        | 49.904979214379  | 43.9724628401189 | 49.1928206164702 | 49.1263312877155 |
|        | 47.1079792035761 | 48.1976189962334 | 45.9104478407175 | 44.3927670230328 |
| ELL    | 109.029196594263 | 127.82585786161  | 103.64431747876  | 209.89649461562  |
|        | 171.270750760376 | 149.249181701692 | 101.46584765758  | 114.230358276599 |
|        | 112.014137492029 | 102.294142438313 | 126.079949368634 | 104.02653369229  |
| ELL2   | 95.4841914842335 | 88.5706300816555 | 122.748811531184 | 364.141443387516 |
|        | 70.2565873027242 | 97.4062608315831 | 69.6301237585571 | 104.351256270039 |
|        | 110.219274023648 | 77.3367966395554 | 80.9821967801845 | 106.356074933606 |
| ELL3   | 67.6767845246581 | 43.8495248991589 | 51.1347974668251 | 41.8778873678551 |
|        | 63.4753448572245 | 58.0910843932181 | 54.0170817319522 | 55.5578334877425 |
|        | 54.7966692984192 | 53.4109882045447 | 48.2050207071554 | 39.0536056496869 |
| ELMO1  | 48.8333989709933 | 52.4212131710421 | 55.5567699051046 | 101.008449241109 |
|        | 49.7458652239071 | 73.5161632100822 | 45.5506835119207 | 52.5481233846246 |
|        | 49.532546810992  | 47.3010040326346 | 54.761682143135  | 52.3406235100961 |
| ELMO2  | 114.493869251904 | 100.300863150751 | 114.674541610026 | 118.762101740563 |
|        | 87.5074297754031 | 116.35075921851  | 97.6552689677199 | 84.3995736970187 |
|        | 95.6731932757489 | 114.488672372067 | 109.456162739433 | 113.367264677544 |
| ELMO3  | 199.54796711653  | 204.370291548631 | 369.355222586283 | 53.3967242431461 |
|        | 102.170521765252 | 51.0506441018166 | 182.219366179899 | 226.767370335792 |
|        | 234.308728996238 | 252.583117397109 | 212.803471204964 | 221.450737998571 |
| ELMOD1 | 42.2455707947223 | 43.0971787292711 | 42.5406888281114 |                  |
|        | 47.9915414951747 | 45.1137938810047 | 44.0804700754786 | 44.7255207589606 |
|        | 42.5435283762933 | 39.2809305246091 | 42.785429206422  | 41.9908237694988 |
|        | 40.2669497398702 |                  |                  |                  |
| ELMOD2 | 84.8139090643412 | 74.8071157013401 | 83.5742879296932 |                  |
|        | 114.876346000655 | 92.8644908993284 | 60.9822577063534 | 89.1012752492647 |
|        | 105.965906809429 | 112.414189401193 | 69.8941497035747 | 74.0420372528779 |
|        | 71.501028931626  |                  |                  |                  |
| ELN    | 57.2008272301399 | 56.6617674371349 | 54.1157382341041 | 46.7577982595088 |
|        | 48.1473938886239 | 73.8105012820769 | 39.7162631015511 | 56.4779645313958 |
|        | 42.2248608921879 | 53.5498255316009 | 48.8088340735921 | 59.6757573886627 |
| ELOF1  | 60.9710783023013 | 68.2521461582047 | 56.3471340054074 | 80.4007868743886 |
|        | 96.221685383385  | 78.0586153423713 | 71.8466937395628 | 66.7530718914083 |
|        | 98.4636016442768 | 63.5107036952143 | 70.2215218476683 | 70.25295977615   |
| ELOVL1 | 96.8783070574131 | 110.487281983469 | 109.251112569215 |                  |
|        | 68.1992221684165 | 95.010312646142  | 70.1074782747874 | 125.512567429299 |
|        | 126.764572234324 | 155.075313035867 | 96.1044453515408 | 121.487591828005 |
|        | 92.2530518251152 |                  |                  |                  |
| ELOVL2 | 34.2180669723984 | 34.6306468196142 | 30.3888349004556 |                  |
|        | 37.4223289687135 | 41.0885562160946 | 55.4694986901287 | 37.0564573649223 |
|        | 46.695848687694  | 36.4476883897928 | 35.6208308220005 | 42.357910063876  |
|        | 45.5800840647989 |                  |                  |                  |
| ELOVL3 | 64.4415447415281 | 34.3715326040967 | 40.931294690669  |                  |
|        | 38.0958223740111 | 42.6022652963326 | 44.1737502492846 | 39.8695929627783 |
|        | 45.3872406432794 | 42.357910063876  | 43.1839109702714 | 41.6336636285875 |
|        | 41.7575097298927 |                  |                  |                  |

ELOVL4 59.6008106247114 46.29198852834 48.7039705048129  
 85.9087280306456 54.6820069269589 70.5699797830702 65.2361525412756  
 88.4439480366515 57.7865070833351 87.0573871033894 77.1900613562529  
 60.7495043977707  
 ELOVL5 183.690616959682 93.584904661285 87.455991111513  
 240.476103976894 180.648144492464 198.682422442825 123.868848519181  
 86.4898752526885 214.316246155274 98.9988668602468 80.9821967801845  
 135.259585457958  
 ELOVL6 141.577762652792 219.838542502016 180.663636520073  
 60.9379216295576 137.034037711549 58.0910843932181 262.9072085191  
 562.798580332885 185.563590013028 193.951097560903 196.844428284247  
 221.325534445978  
 ELOVL7 38.1169703906207 40.0527893189096 38.2280071951674  
 39.066284740632 38.9496515344837 40.040778349137 43.5627649099623  
 39.853866204927 40.3316153483289 45.2556760873335 40.723990462047  
 43.2776458914333  
 ELP2 182.52420078643 259.626847216881 263.765914589758 143.526781144716  
 151.848243044839 247.134338953977 214.51120218554 261.756974562481  
 283.21175871127 245.27542001049 253.764071470001 270.110273110996  
 ELP3 144.863548409034 129.605603092944 173.308366696429 148.964204638494  
 76.8964050504238 185.360921731157 211.164957509884 108.463445585898  
 135.706144105357 328.962069934895 311.301613620475 230.014127346507  
 ELP4 56.8168526942685 91.8568043052819 125.036267601897 106.8866235778  
 102.282066142307 114.142157259903 96.1825551158198 105.474920850981  
 117.191735492199 97.4769942713663 97.712117589297 94.9831937714438  
 ELSBPB1 40.148780650831 43.5182502375207 41.6977706798234  
 39.1706564265495 38.6454098044474 42.6575535390785 42.629412460409  
 45.2806199505029 42.0621425894624 44.8997235283254 37.2018803984555  
 43.1805016690297  
 EMCN 46.5549623118323 48.7084357480922 56.7776874358774 66.0397471691747  
 53.3086645804786 71.9329028989527 42.7431359850339 50.628152951493  
 40.5912213523345 40.5090849993014 61.8445915808329 63.4685821260797  
 EMD 440.421077161585 530.710127703061 533.468347491982 568.905368101326  
 1294.42501356365 788.950470077369 848.079114196986 798.996494242432  
 747.577738135496 760.745188431719 757.257495810249 548.601467852543  
 EME1 50.4872122867759 51.7495306734657 39.9101908547397 37.1894304543751  
 44.6834648302383 46.7800033479223 39.6535880152834 47.2864663693787  
 44.619512785899 35.93950183586 40.547835538778 38.2350720635382  
 EME2 42.3433931248155 42.6022652963326 53.6837370963602 40.4359177791566  
 43.3332476888305 37.5887129572848 40.6750540874299 44.8997235283254  
 32.6039814489621 40.8970401536578 39.153226699662 36.1647506311964  
 EMG1 306.895449954881 235.33716196909 257.506228440451 240.476103976894  
 273.540763256424 290.535354193244 446.613670519745 512.821381202441  
 448.508714709248 311.668075784386 315.880072026714 401.956364010068  
 EMID1 56.6951078698291 49.83247261979 47.9035532886869 49.1786207920603  
 81.6486527718661 49.8472708021525 68.4380822448123 75.2101993995344  
 46.9739160257217 54.8979897528792 49.532546810992 41.3481355128089  
 EMILIN1 262.679844527518 92.3659612653822 54.4384603094793  
 151.601402122351 104.599492214295 278.850071205987 37.7136011474903  
 106.58628367621 41.074824727477 173.308366696429 189.737472782071  
 71.501028931626  
 EMILIN2 132.838429478396 235.222472959869 116.709906902201  
 761.341795853104 201.574654530622 268.54298415337 287.627417889988

|         |                  |                  |                  |                  |
|---------|------------------|------------------|------------------|------------------|
|         | 118.49449420132  | 95.0917871457813 | 159.554916039519 | 128.70380102034  |
|         | 135.592113666246 |                  |                  |                  |
| EMILIN3 | 43.5710871617107 | 42.1607322031054 | 44.6032218589199 |                  |
|         | 37.9875302985336 | 39.859345745831  | 50.0748292497578 | 40.6750540874299 |
|         | 36.3405039629059 | 40.4220196471124 | 38.6454098044474 | 39.5399188536544 |
|         | 43.7672102682067 |                  |                  |                  |
| EML1    | 96.143327683221  | 63.0245691276326 | 59.9043023855039 | 66.3075095149783 |
|         | 58.7239345900248 | 203.586637054746 | 53.9412154719864 | 83.3826639718546 |
|         | 65.2670315837785 | 101.403739410832 | 98.2180003781859 | 93.146085697072  |
| EML3    | 363.324816966828 | 634.226367147025 | 546.287195443189 | 551.915864019927 |
|         | 607.042450917813 | 377.679662622526 | 569.966632625157 | 452.351360652434 |
|         | 429.453114391562 | 631.632335640448 | 579.482255191456 | 406.500583302121 |
| EML4    | 384.919835924792 | 241.486113826383 | 266.905855859261 | 369.451882513347 |
|         | 157.493875535302 | 145.741469970609 | 312.19993077414  | 294.048088688381 |
|         | 282.445037659981 | 338.72596574658  | 335.167786298149 | 386.640440174303 |
| EML5    | 41.4508241771315 | 41.2262949117288 | 39.1480645318984 | 39.7840818430159 |
|         | 41.9397336249742 | 39.2985791324641 | 39.9559575274857 | 36.2539950294089 |
|         | 40.8420925848403 | 44.7520317855773 | 39.6833800000587 | 41.2437378488025 |
| EMP1    | 987.427672417105 | 311.502922515027 | 515.856807472321 | 1223.01485352248 |
|         | 249.308868215205 | 1907.47560253019 | 160.117375210168 | 1182.10714525377 |
|         | 558.855313555287 | 459.021889198824 | 303.670126704469 | 504.847507464269 |
| EMP2    | 39.3709357615493 | 38.2263227947189 | 38.9790184198145 | 37.0732977341185 |
|         | 31.8228237796461 | 40.9506062495231 | 37.4772922422734 | 39.1652965788406 |
|         | 38.2215591930186 | 37.6383530120621 | 51.3103617600342 | 40.1700117452801 |
| EMP3    | 910.898566308567 | 407.564154455615 | 424.182335137838 | 2357.96534075689 |
|         | 250.545098051392 | 2024.4791883541  | 277.878824242495 | 317.892699374852 |
|         | 167.410607476565 | 826.024359447649 | 769.685677484067 | 638.064750551015 |
| EMR1    | 41.9407041937973 | 47.1332119496722 | 48.2883694323339 | 61.7502624458447 |
|         | 38.4540849632254 | 40.7616966228404 | 44.4639405506967 | 39.9576138799997 |
|         | 41.2870505273664 | 47.0055981216687 | 40.8225507267584 | 42.57175366709   |
| EMR2    | 81.6486527718661 | 71.4197504261453 | 66.4079972657486 | 664.453262499828 |
|         | 109.017269529278 | 85.3718124658316 | 71.9474405671289 | 70.9702772728923 |
|         | 63.6222532132037 | 50.0564735608363 | 49.2206713037152 | 48.27609330316   |
| EMR3    | 37.6817357354748 | 40.8476436931481 | 35.6139301508335 | 87.114638423256  |
|         | 32.1011040606811 | 42.357910063876  | 42.8684958525042 | 35.5179217192467 |
|         | 35.860430241131  | 36.1014515012722 | 35.046946054314  | 34.2597466305328 |
| EMR4    | 43.1267841876606 | 41.6466169548846 | 39.2356332888903 | 47.8164193292842 |
|         | 37.7235613375742 | 40.3981965583868 | 43.3262148375525 | 39.5466975353131 |
|         | 38.2981083038519 | 42.3288275690551 | 42.409203830483  | 41.3837720590283 |
| EMX1    | 44.436995101921  | 46.1131345131683 | 41.1742244762318 | 42.5193208629123 |
|         | 40.1151953732637 | 43.7078399718247 | 41.7614975630362 | 38.1835938174625 |
|         | 46.3203995372658 | 37.1275334308172 | 40.3452320167286 | 40.8681871019812 |
| EMX2    | 42.3433931248155 | 44.5544727111028 | 41.8389336728199 | 39.6833800000587 |
|         | 49.1263312877155 | 48.3686935595826 | 110.379403044901 | 115.328304312071 |
|         | 50.0526763693329 | 69.4677195088043 | 65.7587943905649 | 43.3262148375525 |
| EN1     | 38.0089018744739 | 39.5050383901884 | 39.8299340037009 | 35.6928955245309 |
|         | 40.6723334103791 | 34.2773859804062 | 39.2533668167483 | 42.7431359850339 |
|         | 40.0403898620771 | 32.7131023641972 | 39.6403089864678 | 37.6557714476853 |
| EN2     | 36.2496364442264 | 33.0553208959996 | 45.063792968927  | 42.1273928203021 |
|         | 44.5668141895992 | 37.4782441311626 | 41.706879587091  | 34.3865306339645 |
|         | 40.4220196471124 | 43.844855336215  | 38.8507804383261 | 35.3525469364579 |
| ENAH    | 69.0226263333556 | 46.857923273572  | 48.0191002461099 | 45.9379019161109 |
|         | 60.4593810615882 | 172.317945975659 | 51.5967098638347 | 59.8760452220989 |
|         | 67.8208976798364 | 124.76401857899  | 128.70380102034  | 151.775928080246 |

|         |                  |                  |                  |                  |
|---------|------------------|------------------|------------------|------------------|
| ENAM    | 36.0144420013819 | 38.1312950900467 | 39.5450079747895 | 41.4273122914951 |
|         | 37.3508690072156 | 45.6129956328415 | 44.6032218589199 | 40.831207953647  |
|         | 39.0775870687758 | 41.3321861371202 | 41.9908237694988 | 39.2469742642337 |
| ENC1    | 355.423376744934 | 207.99040155018  | 243.803668806533 | 173.694418385132 |
|         | 283.88971280023  | 89.1290937615998 | 279.521995263196 | 389.994289973076 |
|         | 198.585368334563 | 195.403882457038 | 282.802560118785 | 110.13638939902  |
| ENDOD1  | 129.185046410316 | 65.6721629145797 | 72.5835488194631 |                  |
|         | 54.1240583139871 | 69.8804970538895 | 101.383978726419 | 53.8687221233237 |
|         | 93.0474674148534 | 95.9999165639785 | 76.011923854897  | 95.2915739972533 |
|         | 95.3145142003966 |                  |                  |                  |
| ENDOG   | 133.067727272864 | 142.066425511614 | 155.650716735976 | 92.4781449270918 |
|         | 214.127390534906 | 116.35075921851  | 246.20973320244  | 136.650986373497 |
|         | 200.174103125152 | 99.9951025176909 | 131.757828130578 | 111.357508398822 |
| ENDOGL1 | 120.381190859636 | 51.119812302881  | 77.7907484334847 |                  |
|         | 479.696469083953 | 145.572606290643 | 230.879083362388 | 67.8919712859031 |
|         | 140.175068871414 | 54.4912806027381 | 66.5422130374814 | 58.6464918752765 |
|         | 57.934622029119  |                  |                  |                  |
| ENG     | 183.799353414581 | 221.847615564378 | 271.008929897376 | 455.223217772744 |
|         | 197.205643078662 | 176.670909065664 | 93.5928272702304 | 154.111066539468 |
|         | 101.954354107731 | 123.46775722643  | 217.263889616995 | 145.847014515246 |
| ENO1    | 7476.94487791412 | 5074.07305640514 | 5776.17749026501 | 5776.17749026501 |
|         | 5479.94045861143 | 3099.21690111993 | 8259.38594893529 | 5112.4354472796  |
|         | 11410.3307451176 | 3399.75820494572 | 3391.65926812276 | 3800.19142219719 |
| ENO2    | 460.865101118125 | 119.647202975116 | 109.374838860558 | 118.316810638061 |
|         | 98.0143500562821 | 137.802147212644 | 266.717224821545 | 141.261334415286 |
|         | 282.035361446993 | 183.311305255895 | 153.595112580363 | 173.100153934025 |
| ENO3    | 73.252713742627  | 52.3896785600751 | 54.5191471810265 | 58.3475983630509 |
|         | 57.9903227926667 | 50.0404995046748 | 65.3071954258488 | 52.3565394429739 |
|         | 43.0456011922275 | 71.4356132400211 | 55.5276281380084 | 54.7953298048942 |
| ENOPH1  | 301.025314855652 | 464.209794165593 | 356.727720725014 |                  |
|         | 271.436000380202 | 332.137622104526 | 276.666571115104 | 458.47341225284  |
|         | 278.850071205987 | 430.743220222202 | 169.838827072973 | 210.096514889445 |
|         | 369.797483212264 |                  |                  |                  |
| ENOSF1  | 128.436305192918 | 191.09175268141  | 164.343309332109 |                  |
|         | 126.911056987607 | 150.43149196048  | 120.618530729822 | 144.227861902786 |
|         | 147.017279035061 | 304.658728492827 | 169.633672522325 | 221.163225922749 |
|         | 138.916915463074 |                  |                  |                  |
| ENOX1   | 40.7609952437622 | 34.0382693188794 | 34.9849896310235 | 38.2041059863839 |
|         | 34.6227169056411 | 40.650742261428  | 41.1507980856436 | 42.0494116081998 |
|         | 36.6312676076142 | 37.920964499903  | 42.6366765186182 | 49.3984571719129 |
| ENOX2   | 53.3059058105836 | 64.7219521869942 | 56.8595344107711 | 50.9643363406241 |
|         | 80.0637650599841 | 68.1969125201241 | 72.8653205184014 | 50.7964800730186 |
|         | 72.4796479443344 | 64.8549209064366 | 58.6464918752765 | 61.2685222381296 |
| ENPEP   | 48.5835484742456 | 44.7200265825016 | 45.645828394758  | 45.4882438975269 |
|         | 44.7829632472754 | 49.3654837541353 | 40.6750540874299 | 45.1151758109609 |
|         | 41.9097689475185 | 39.3698811593364 | 42.4580504587581 | 40.5703581862752 |
| ENPP1   | 43.9309845324767 | 47.8400694856726 | 52.0742951366864 | 49.9014504704021 |
|         | 43.9450023643394 | 41.554942319225  | 49.2546642180676 | 52.407151732257  |
|         | 47.0804681460898 | 56.685925255591  | 52.6960621424156 | 48.9733758107788 |
| ENPP2   | 60.394307846869  | 103.189199090363 | 284.437758089699 | 199.858233616116 |
|         | 66.0411740221276 | 174.263925108623 | 57.6643188499117 | 85.8116307540247 |
|         | 52.3187919317561 | 134.152059562322 | 275.222714101589 | 131.380698046552 |

ENPP3 37.2474303302343 43.0227387991135 42.5406888281114 47.481302504066  
42.0709558258414 56.1671440556142 42.8684958525042 42.0494116081998  
43.3744503319109 45.0155543555707 40.2649309204478 41.5536168238478  
ENPP4 91.6253858792439 101.523741547876 67.6373573669424 100.001150612051  
108.063001800611 101.540333720181 82.6381941930783 64.0476795495651  
91.8414653633828 63.7836577144372 72.1090339831747 83.2925226467532  
ENPP5 60.4593810615882 57.2871072823547 52.3432130135266 46.1673159982664  
55.1563703466328 55.4694986901287 62.0404348860702 73.0394191668858  
84.0899854321388 92.261357059727 72.1090339831747 72.2211523775459  
ENPP6 45.1912496459517 41.2598458726002 44.0451487108213 42.6913548400127  
53.9074374788981 46.263826584899 42.357910063876 43.6434576713809  
70.178974380507 48.7414853386615 61.0979269700412 45.0035308952466  
ENPP7 37.9387791625384 43.6587492470348 40.1985790927248 36.0481934423077  
42.4864576619427 39.3565586789274 41.9393838138203 41.0381860307445  
45.0666179335087 42.2614524730856 42.357910063876 43.3744503319109  
ENSA 144.515737827731 233.435884567494 270.543988412382 127.50316411791  
235.764999941441 188.582370265555 220.743173420176 262.088864041385  
217.065944053174 95.2915739972533 114.5696064637 195.146655512672  
ENTHD1 36.9060997041453 41.2598458726002 38.5045333213784  
38.4208429103799 37.0526522140242 39.7394181011603 35.6056062164318  
35.1738399826814 34.3842972343227 33.6188027862739 37.2018803984555  
32.8921051249019  
ENTPD1 184.989940464859 159.747484721905 189.705164944697  
294.155188719236 110.599131324937 227.404530886674 86.7968607218397  
106.398825125486 60.7480970026669 74.6847594297153 84.1112814779578  
83.5069968129733  
ENTPD2 39.0237504776589 44.3529919625344 37.634370327756  
39.2780515621926 40.7779767565889 40.650742261428 40.4967168818294  
37.4484310268909 38.3981095229401 41.9097689475185 34.8383995317036  
40.6216891610774  
ENTPD3 65.4561038762234 258.726193861248 238.584514797019  
50.4487395010341 183.311305255895 55.6735944873518 53.6294062560285  
126.218285718433 91.4888405899074 165.613176704286 203.109765192983  
214.873872837015  
ENTPD4 97.0254711947754 77.9992448636936 140.030757545662  
92.2530518251152 64.4999048115671 58.5530199658661 81.9504925867759  
68.8058577447202 82.1974756449763 52.5522545249206 76.5505585423421  
69.6579723433329  
ENTPD5 44.3355304829989 48.4497719907777 48.8100349749783  
41.3027031037343 39.6535880152834 40.1428591998404 49.1067959632109  
45.1714698794331 44.1519466943185 55.7930787690756 50.4740079109854  
57.934622029119  
ENTPD6 199.54796711653 134.099684731177 172.317945975659  
99.8063480813138 170.593589984253 102.980622026276 124.599352191013  
111.367789538268 130.249044369793 128.291287011686 120.837993273922  
111.607814098243  
ENTPD7 46.9939712192224 54.7083331985678 49.6347864008749  
52.5307002738469 56.2305155589239 39.8455060654531 54.0170817319522  
61.5000955267432 62.7205631511304 57.9713749600418 66.2027948645675  
66.4626619269287  
ENTPD8 37.7766325325437 42.7775752471711 37.4642807402741  
41.4812544772644 39.9042726867255 37.3356865956886 36.5352572191451  
37.9344616270526 37.409945204123 38.745552403895 41.1367478979484  
39.983244606774



|          |                  |                  |                  |                  |
|----------|------------------|------------------|------------------|------------------|
| ENY2     | 1450.53108586858 | 743.094853186365 | 382.744696166534 | 764.571579067138 |
|          | 1263.76838179117 | 744.421618408497 | 750.151825182993 | 540.304257899761 |
|          | 779.996851709716 | 338.000998124097 | 353.531051185171 | 563.927521628693 |
| EOMES    | 45.0985088502363 | 41.8848959280916 | 46.9040704638073 | 74.7732045170597 |
|          | 43.6587492470348 | 41.159706131351  | 36.197424053556  | 44.9977782988116 |
|          | 31.7063377004409 | 45.2556760873335 | 35.7953070087288 | 29.0303154053123 |
| EP300    | 105.45765455249  | 170.20428461603  | 163.028918580618 | 180.648144492464 |
|          | 152.608998839745 | 125.184689092836 | 111.714563124738 | 105.822362552251 |
|          | 137.764748752401 | 111.399831013724 | 147.06837658726  | 114.396745444915 |
| EP400    | 336.159430045964 | 246.820301517765 | 197.373541848064 | 203.152852313746 |
|          | 163.028918580618 | 197.325473090277 | 230.787791652978 | 150.572774995368 |
|          | 298.54401957868  | 257.506228440451 | 280.275836993258 | 181.420545696696 |
| EP400NL  | 46.1513019317765 | 45.0905928998779 | 49.8344973836834 |                  |
|          | 39.1335009052403 | 46.7058093820839 | 43.2805590023412 | 45.1694246393676 |
|          | 42.4926864381766 | 40.7460990419215 | 40.8970401536578 | 43.5258090162298 |
|          | 43.1805016690297 |                  |                  |                  |
| EPAS1    | 690.568858101531 | 1311.88650141004 | 2009.75680599899 | 1245.45371155527 |
|          | 720.552354470517 | 1423.29307392266 | 146.117756310709 | 484.968116511768 |
|          | 484.218958528411 | 878.863554510943 | 933.968759959712 | 751.953794043451 |
| EPB41    | 39.721757876562  | 53.6895401581575 | 43.26160898693   | 42.8768096578102 |
|          | 44.5152708955623 | 42.0902716047029 | 48.0283573444179 | 46.6456668510218 |
|          | 50.401623258584  | 39.3260254992968 | 45.390192977585  | 39.1553169409075 |
| EPB41L1  | 54.7786516309154 | 50.4872122867759 | 47.2962360458401 |                  |
|          | 42.8235313007746 | 53.4751250621694 | 46.3203995372658 | 70.1845639720491 |
|          | 87.0116305167987 | 75.7502062965698 | 66.8920765290571 | 63.3121284680843 |
|          | 61.5300817099814 |                  |                  |                  |
| EPB41L2  | 96.6833301748676 | 82.5344501505114 | 87.5146535320072 |                  |
|          | 80.8078050043929 | 68.2428802339852 | 194.278792348966 | 78.4023698691285 |
|          | 70.6568303458436 | 48.1174861108648 | 106.679905803492 | 112.613079254002 |
|          | 86.0230765383602 |                  |                  |                  |
| EPB41L3  | 117.869393694564 | 90.791818798144  | 108.928854330744 |                  |
|          | 634.514100741768 | 73.3533274030352 | 304.658728492827 | 99.2824152850072 |
|          | 180.916465721523 | 44.8003345643334 | 178.961579489906 | 137.802147212644 |
|          | 189.705164944697 |                  |                  |                  |
| EPB41L4A | 54.931538325692  | 49.5443425465542 | 56.607199625498  |                  |
|          | 56.6458456890715 | 37.4470183315826 | 42.5660695551615 | 54.1707158323527 |
|          | 61.3077641493507 | 54.7033747046992 | 53.4109882045447 | 57.9864701726379 |
|          | 59.2035499250243 |                  |                  |                  |
| EPB41L4B | 50.379587451669  | 53.4109882045447 | 41.3366779545815 |                  |
|          | 45.0017158586743 | 46.8086806989607 | 43.7630587657205 | 52.4876329865056 |
|          | 47.4439407315335 | 54.4912806027381 | 49.461728580617  | 50.0303076717704 |
|          | 45.7979032939211 |                  |                  |                  |
| EPB41L5  | 55.4004611309636 | 50.1027491117756 | 54.1952533541951 |                  |
|          | 47.6687908290818 | 58.3564461855595 | 78.6948922624369 | 49.3854238365325 |
|          | 48.3590401011623 | 65.644767142472  | 69.4677195088043 | 61.9976238937207 |
|          | 62.58750768974   |                  |                  |                  |
| EPB42    | 38.0089018744739 | 36.5219488315447 | 39.991353369336  | 36.6501141438378 |
|          | 40.4639532172338 | 40.1428591998404 | 35.8227939208521 | 37.0390589468421 |
|          | 38.5252456306656 | 36.2435874904689 | 37.9946685306274 | 32.7043743065388 |
| EPB49    | 55.3153799233744 | 61.6878176260761 | 43.7630587657205 | 48.309866878365  |
|          | 46.0043807840705 | 56.1671440556142 | 67.8919712859031 | 54.3820590274321 |
|          | 55.0748878261048 | 73.5527788467294 | 74.466989900636  | 59.0894921452893 |

|        |                  |                  |                  |                  |
|--------|------------------|------------------|------------------|------------------|
| EPC1   | 54.2648201582657 | 73.7873098190297 | 48.3847843498476 | 54.2886483704949 |
|        | 61.8471691369569 | 77.0226403968683 | 48.9826868640753 | 49.2019743609873 |
|        | 66.4251023257203 | 69.2963913574682 | 84.2960453806012 | 73.845912534353  |
| EPC2   | 42.5193208629123 | 42.3550738181144 | 44.5134109184888 | 40.1804147506786 |
|        | 48.1473938886239 | 50.9724155054821 | 44.7255207589606 | 45.642304356051  |
|        | 39.7537274655115 | 49.3000844711116 | 56.7765567227989 | 48.3648494350286 |
| EPDR1  | 355.04502859751  | 197.841210387578 | 51.6159542017038 | 215.645475520124 |
|        | 69.805066579191  | 297.404152949522 | 103.545764794149 | 145.630337418553 |
|        | 114.719721626067 | 363.947777340854 | 217.39432336811  | 229.837344196558 |
| EPGN   | 52.0299937917925 | 55.0897019602305 | 55.5567699051046 | 69.5544840164738 |
|        | 58.2780916793348 | 56.3525213736952 | 61.6544855697851 | 49.6203214143464 |
|        | 69.9767092409915 | 61.9882398986333 | 46.824299585607  | 59.2035499250243 |
| EPHA1  | 252.535061916875 | 279.521995263196 | 373.46798029115  | 61.0845101400379 |
|        | 210.200786815048 | 53.7442594289333 | 150.374739898477 | 162.106596527489 |
|        | 535.585999498708 | 148.144200968432 | 126.920579478593 | 99.1769280484821 |
| EPHA10 | 52.7948184519106 | 41.5132248356707 | 46.6588655218735 |                  |
|        | 47.6687908290818 | 47.5647821785529 | 46.1513019317765 | 43.1602899171656 |
|        | 47.0362584198466 | 45.3756389170606 | 48.5374448344297 | 45.8180710486329 |
|        | 42.9887069977696 |                  |                  |                  |
| EPHA2  | 91.6826894933058 | 139.999709303614 | 209.363955566338 | 50.7046706880325 |
|        | 132.257197568848 | 62.1857038870283 | 65.0031119608637 | 343.990395610093 |
|        | 188.750770811584 | 85.7732262204681 | 112.565968152932 | 92.9600461444587 |
| EPHA3  | 42.3606390470387 | 42.6939394537076 | 43.1709743883785 | 44.1483976313959 |
|        | 44.7114813656401 | 70.8674195845729 | 41.3594868055879 | 44.293922970134  |
|        | 44.8003345643334 | 45.8505603625223 | 53.5453975444568 | 43.2312848495114 |
| EPHA4  | 88.6663961027926 | 57.5941849631773 | 54.1637401903523 | 68.9937449813561 |
|        | 61.3077641493507 | 58.2531879680192 | 61.5000955267432 | 61.2343203799193 |
|        | 122.748811531184 | 61.8529316708431 | 72.842552380479  | 51.0647893605839 |
| EPHA5  | 39.8662795144616 | 39.9339434067497 | 32.0500360504817 | 36.7128997214853 |
|        | 37.4881665029302 | 37.0740019672788 | 38.941855825269  | 37.0795845518148 |
|        | 35.3227485563945 | 37.8490162439785 | 35.4676843900423 | 34.9732824977751 |
| EPHA6  | 41.1523487516364 | 41.5061991514748 | 41.8389336728199 | 41.8125315089117 |
|        | 40.6387590440575 | 42.4155142987678 | 40.1613888954735 | 41.9680383884948 |
|        | 39.4524820354904 | 39.6333888530279 | 42.9699559565161 | 41.9701179220033 |
| EPHA7  | 39.9697332660833 | 43.8495248991589 | 38.0452862258803 | 41.4273122914951 |
|        | 41.6806984441849 | 37.2686490268265 | 46.4388841354122 | 40.3357777530419 |
|        | 41.3803269429468 | 43.4885245598939 | 39.2542963855807 | 44.3521099857368 |
| EPHA8  | 40.8681871019812 | 44.3187284857534 | 45.4634652319753 | 43.4877740913713 |
|        | 61.0468099710416 | 47.2505395290129 | 40.2154497375715 | 48.8333989709933 |
|        | 44.9645354363967 | 44.1861590259178 | 42.7275315121163 | 46.8129509799753 |
| EPHB1  | 48.4849194706125 | 44.2630383225933 | 51.3268475761593 | 69.6511571901941 |
|        | 44.9936360641969 | 46.0364000143537 | 98.0023132593711 | 61.3864512710242 |
|        | 52.3579564953125 | 40.8970401536578 | 105.953705702398 | 43.4709415392696 |
| EPHB2  | 50.8875036861067 | 37.2103401831788 | 36.131485826118  | 42.1273928203021 |
|        | 48.1986674201502 | 42.750861693377  | 48.1146464339794 | 49.8666125578518 |
|        | 55.4635297192076 | 44.3648993568405 | 36.131485826118  | 42.8864415494484 |
| EPHB3  | 101.002303802745 | 50.7487159427973 | 44.696023817801  | 50.8567345921473 |
|        | 56.5933259268408 | 53.8461734834857 | 58.3675164086197 | 72.3822545261582 |
|        | 61.5807110546718 | 76.4439037944547 | 68.878562323012  | 52.4992300612807 |
| EPHB4  | 281.201604778921 | 98.0967511777819 | 292.93036571522  | 174.117816184497 |
|        | 315.065866567211 | 111.240804216088 | 159.359051158123 | 255.126812649967 |
|        | 297.187417426993 | 154.707548614663 | 146.969565088793 | 134.024691118762 |

|          |                  |                  |                  |                  |
|----------|------------------|------------------|------------------|------------------|
| EPHB6    | 57.6285775590145 | 225.460800739619 | 233.468474830926 | 81.382229980722  |
|          | 97.7153995525346 | 90.5359675350156 | 65.3694267397114 | 105.474920850981 |
|          | 301.79813401066  | 259.276586396099 | 157.020685801527 | 111.874193363836 |
| EPHX1    | 123.868848519181 | 72.7987593815919 | 84.5998418020787 | 63.7909104347097 |
|          | 107.770004093887 | 205.121208974511 | 102.380096190518 | 137.403148427792 |
|          | 99.2341244350412 | 177.912351477808 | 336.737571879156 | 200.986069552443 |
| EPHX2    | 43.6706764143908 | 49.2050538150106 | 80.257554904218  | 52.3004056941891 |
|          | 57.4163094213712 | 83.7019398654324 | 43.3262148375525 | 40.3357777530419 |
|          | 49.9162522057712 | 76.6346767983285 | 69.3645322033576 | 74.9294208313176 |
| EPM2A    | 41.5668884168669 | 45.5587966941116 | 41.924725226806  | 39.2780515621926 |
|          | 43.5544347011646 | 55.3202238943712 | 35.0797534809405 | 42.157627240486  |
|          | 41.9083581529276 | 52.2256177934134 | 48.9906383294199 | 51.9447450229707 |
| EPM2AIP1 | 203.913062066149 | 266.634368304904 | 186.450759425396 |                  |
|          | 180.873540853324 | 734.143790759359 | 366.515210930763 | 211.164957509884 |
|          | 133.060894083935 | 194.985223342082 | 375.697071471585 | 344.985739524681 |
|          | 215.869541768982 |                  |                  |                  |
| EPN1     | 1005.45493369789 | 1466.88103496067 | 1591.51486001004 | 1087.75682788799 |
|          | 2435.70120719503 | 1301.07436212673 | 1588.70376317303 | 1296.28036613191 |
|          | 1975.28674300761 | 1076.05074395483 | 1259.2978319548  | 920.504890206997 |
| EPN2     | 80.3266484520306 | 87.3870406334559 | 76.9904391375645 | 55.8709511400674 |
|          | 70.4262478188233 | 86.9924799927707 | 143.973063517706 | 70.2021753365478 |
|          | 73.4535007027931 | 84.9863403576284 | 81.2850357499192 | 69.9767092409915 |
| EPN3     | 59.5000730792772 | 170.082014272945 | 151.601402122351 | 38.745552403895  |
|          | 111.256949641793 | 51.9421032049606 | 74.5591290353333 | 69.0819394834919 |
|          | 158.195749606017 | 80.8593396441328 | 91.3723635213821 | 64.7346994616044 |
| EPO      | 40.4639532172338 | 43.5182502375207 | 36.0306975524309 | 38.5252456306656 |
|          | 44.147557390293  | 38.7340969861754 | 39.5496902678788 | 53.5271601314404 |
|          | 42.8036731479932 | 42.3606390470387 | 43.5710871617107 | 41.9430737035925 |
| EPOR     | 66.0303950772736 | 48.8584917918986 | 41.0356368374708 | 45.5869891570251 |
|          | 40.2449343247539 | 43.8582747295766 | 42.8684958525042 | 81.3978207813439 |
|          | 46.4164127487052 | 82.2431666775699 | 76.8713035584472 | 78.7496673195407 |
| EPPB9    | 43.3638918705225 | 36.89524015739   | 41.1367478979484 | 36.0481934423077 |
|          | 46.6397391251762 | 45.0882356578404 | 49.6872467499977 | 42.157627240486  |
|          | 45.2897806651929 | 46.325232414659  | 39.9899430628542 | 48.0350549043063 |
| EPPK1    | 41.5421429082231 | 42.7775752471711 | 36.5474283500601 | 37.9875302985336 |
|          | 44.2607789091176 | 41.0582900711341 | 38.4005795891396 | 36.43924066428   |
|          | 33.6288663955758 | 43.1839109702714 | 34.8383995317036 | 33.1559412791294 |
| EPR1     | 45.7356815244513 | 40.4359177791566 | 41.437237454134  | 39.1706564265495 |
|          | 39.859345745831  | 45.8325181856483 | 56.7780520416533 | 47.3791873993182 |
|          | 42.357910063876  | 42.6793753550854 | 38.3684202018524 | 42.0424641526302 |
| EPRS     | 337.948887427898 | 514.261598258395 | 586.026364123617 | 622.964590694346 |
|          | 644.368005872231 | 579.260404515899 | 659.126408705362 | 591.192020333181 |
|          | 601.375421126664 | 434.223722811041 | 488.908231529696 | 489.622327794168 |
| EPS15    | 116.426770366736 | 110.093465196133 | 88.9928368134295 | 118.316810638061 |
|          | 71.5345397102823 | 167.05554959607  | 105.247736284747 | 101.39385858723  |
|          | 86.2563919366781 | 156.591349262922 | 150.082905944963 | 145.01315947031  |
| EPS15L1  | 70.9419509323007 | 63.2804984998739 | 64.1080166181228 |                  |
|          | 75.6103053700122 | 99.0647786948132 | 79.0940380276977 | 76.0041771381018 |
|          | 63.9851732498913 | 57.7865070833351 | 62.3233491851723 | 68.3157692917711 |
|          | 63.1443731864055 |                  |                  |                  |
| EPS8     | 71.2963721541702 | 99.9752275166514 | 160.973602503707 | 53.0284011078097 |
|          | 66.4047895961325 | 122.036614711384 | 90.2915974511786 | 119.86041265821  |
|          | 158.408644964483 | 190.592556065939 | 144.098339910117 | 162.02498480452  |

EPS8L1 48.3451401499671 56.0183341691645 67.8452645288969  
 41.1886975241176 50.5707478277575 42.9125608028481 49.319499137678  
 44.553780984244 70.9214288336034 46.6025757239946 46.2859819541831  
 46.8752988519617  
 EPS8L2 38.932557955217 43.683792219729 37.5303767522393  
 45.2640606138546 38.6134012710484 41.2181878103506 40.3850714987723  
 40.4737825400374 39.8022382792104 42.2455707947223 40.4504608195666  
 41.1554481567603  
 EPS8L3 40.5654775358427 41.8534933577029 39.4710743516517  
 44.7980740332174 40.9950639693255 42.750861693377 43.6753843488695  
 39.5954353681031 37.6630259432398 46.3810615657263 38.3684202018524  
 47.1060577218993  
 EPSTI1 410.058119360034 391.187784616808 370.240482282297  
 648.380417557148 117.689172019617 155.888873407786 513.57613902662  
 176.653849515825 113.148617122619 113.873117749074 168.482495410546  
 111.227016020927  
 EPX 35.6111578834671 37.3634897565502 38.4043916290561 38.3166554965434  
 42.4864576619427 41.4508241771315 35.9058393060637 46.9986083378817  
 40.6957787921451 38.0078357808393 38.6662194645633 36.2582325396375  
 EPYC 204.659954879641 39.7835513496873 41.2365089689635 58.7338159410728  
 36.2048942610546 38.4330755397458 35.3362091871364 41.2551966132486  
 43.7630587657205 34.064698871541 35.6970528713709 33.5578650644246  
 ERAF 41.1523487516364 45.7317208802318 39.5450079747895 46.4555908533915  
 35.7973685350741 44.4619248757502 46.1634822993009 45.642304356051  
 49.7336769474446 53.8260140375214 45.8180710486329 36.6603338274678  
 ERAL1 343.892794667047 275.928723831899 244.226756210656 186.64040927334  
 418.01691355558 225.794026573235 483.20917825594 363.002913525646  
 419.182443507848 261.569542242954 295.917955889194 227.567182783564  
 ERAP1 43.1805016690297 51.2405397507224 55.9927099883616 46.9919960628953  
 43.1252272136667 43.1826328292558 40.7910160811527 45.4882438975269  
 48.4614401417022 43.1839109702714 45.390192977585 44.4951343330035  
 ERAP2 322.509777895373 323.295794446334 82.9449579428926 335.818251279914  
 141.740347756446 179.886168478179 51.7714254834195 299.052630634189  
 78.4428909886495 72.6549171886783 87.4850071876743 62.8485724004124  
 ERAS 41.9407041937973 40.4359177791566 42.157627240486 42.9358255168086  
 43.004943518025 40.244271403831 39.3585350448719 37.1317006162938  
 37.0126425326534 40.5090849993014 43.7585538437696 41.3481355128089  
 ERBB2 547.729200972776 348.123960682064 374.723141438448 60.7397678774507  
 262.579533452771 115.913030448537 690.568858101531 895.735191953679  
 818.608913659251 474.155196153863 348.450810225807 304.977139992391  
 ERBB2IP 50.3422285917 53.0063130674306 50.3452972893313  
 58.3475983630509 56.6557577134933 52.3187919317561 50.4260283682427  
 48.7039705048129 62.1796792097014 46.2768056702424 51.6869155634183  
 55.1109784383525  
 ERBB3 182.601427407211 249.942109342324 146.789051265805 44.484692294383  
 108.063001800611 53.155979669047 171.33368481035 274.648263378054  
 267.024267633341 133.893108529325 141.567299023381 133.69701250532  
 ERBB4 47.1962846565261 48.275452803061 53.4743535852344 57.8277957325085  
 40.4639532172338 49.1013967533186 56.7780520416533 54.2877981508636  
 51.0062122023297 49.9493230064613 51.6414075056938 51.9447450229707  
 ERC1 41.8772051675749 41.768427504666 44.0014471264417 40.4967168818294  
 41.8524296959457 45.5779686360641 47.209353240759 43.4885245598939  
 43.3744503319109 46.8954576545929 47.3501115999636 45.8546719310325

|        |                  |                  |                  |                  |
|--------|------------------|------------------|------------------|------------------|
| ERC2   | 38.957687788868  | 43.4396866157171 | 39.3709357615493 | 41.4273122914951 |
|        | 36.9060997041453 | 39.2248354955045 | 39.5496902678788 | 36.9355798143571 |
|        | 40.2274522635576 | 38.4187686307607 | 36.43924066428   | 39.9519547348106 |
| ERCC1  | 163.067962559455 | 128.436305192918 | 175.056828374791 | 210.485586903711 |
|        | 179.694413858411 | 205.378123452174 | 193.01447006167  | 268.54298415337  |
|        | 192.356440003154 | 179.342338803631 | 201.657389063895 | 175.28322146764  |
| ERCC2  | 106.219480656782 | 80.257554904218  | 168.225699005719 | 67.7121534934164 |
|        | 128.749209040345 | 92.2772139468085 | 75.8779316255794 | 105.743957034577 |
|        | 75.891637602914  | 113.388372364837 | 87.7844808613265 | 69.6021553604792 |
| ERCC3  | 243.015896514493 | 247.676607756929 | 229.697141930047 | 183.613579501306 |
|        | 232.081000478989 | 197.868575583033 | 157.463465828715 | 198.54718783437  |
|        | 152.942332679485 | 185.94424664238  | 190.548265163011 | 187.16833117416  |
| ERCC4  | 42.8561766050988 | 48.2870269886682 | 50.5505693464794 | 46.8249967544573 |
|        | 53.4751250621694 | 53.7236425500919 | 44.7255207589606 | 51.4931742685391 |
|        | 44.2142581488029 | 44.8561781465248 | 47.2134341420411 | 47.3172462673426 |
| ERCC5  | 432.669787408904 | 454.701322158431 | 434.682456437647 | 413.990148966099 |
|        | 305.554059609771 | 300.412043023998 | 276.747699321595 | 274.731304343034 |
|        | 366.515210930763 | 537.471287449696 | 469.427640339806 | 402.412173952792 |
| ERCC6  | 56.2508140932179 | 46.3635803515159 | 50.2869791217819 | 42.8235313007746 |
|        | 39.0564222526273 | 42.6575535390785 | 46.4388841354122 | 46.1673159982664 |
|        | 48.9931786790166 | 48.1392888470269 | 38.5668610487033 | 51.3244198342335 |
| ERCC6L | 44.9896851005259 | 44.6388394563024 | 46.7508829977587 |                  |
|        | 41.6564075217517 | 58.2780916793348 | 40.1428591998404 | 55.9821365674554 |
|        | 53.9918882088235 | 59.4791385941479 | 40.6559419616644 | 38.956280281655  |
|        | 40.5703581862752 |                  |                  |                  |
| ERCC8  | 46.8613212048981 | 47.6229101519945 | 52.2695562895186 | 47.2862299990937 |
|        | 51.7983110178095 | 51.9421032049606 | 43.8605301756239 | 45.8108990837624 |
|        | 46.1572972254663 | 41.785676764591  | 43.0785028570404 | 46.9867599298218 |
| EREG   | 37.3463875295726 | 41.2598458726002 | 50.5089777244781 | 58.5406981871153 |
|        | 40.3452320167286 | 45.7300501624017 | 46.5650556481721 | 50.5070012045444 |
|        | 47.1744296124496 | 45.0155543555707 | 39.2542963855807 | 43.0930293831497 |
| ERF    | 92.843017373656  | 89.4111455826308 | 109.594402843796 | 110.431464700539 |
|        | 112.830467116678 | 119.14126712577  | 90.0682241853516 | 101.888001006345 |
|        | 141.501071047479 | 111.056599389048 | 117.074650076861 | 80.0381580139229 |
| ERG    | 43.1180113655693 | 44.9877531846933 | 43.0697338561114 | 55.4180794172794 |
|        | 46.8674366115656 | 46.4343327861696 | 44.7915315085948 | 44.2580151149956 |
|        | 44.014761416117  | 46.7646877499666 | 44.2446125027849 | 44.7915315085948 |
| ERGIC1 | 79.5898953726467 | 68.6627996695828 | 59.9690744676539 |                  |
|        | 106.067766766889 | 73.2144205844199 | 71.2370255410834 | 63.928488869459  |
|        | 93.7090094630558 | 72.487245822532  | 68.4527140982234 | 69.1743062945144 |
|        | 82.9191817146388 |                  |                  |                  |
| ERGIC2 | 78.6705291023488 | 78.9203273221608 | 76.5699943825825 |                  |
|        | 122.412295645862 | 76.209239524646  | 92.47006193987   | 93.3897477314201 |
|        | 89.5130163419167 | 88.8772406115484 | 74.1228645930185 | 74.1425714439424 |
|        | 102.035798846699 |                  |                  |                  |
| ERGIC3 | 692.630044242985 | 689.228901128857 | 964.268294825556 |                  |
|        | 512.691506909762 | 864.302844775203 | 592.399245288911 | 716.434968700383 |
|        | 651.795139128843 | 684.865133028228 | 744.762787024945 | 878.863554510943 |
|        | 843.078502001733 |                  |                  |                  |
| ERH    | 375.354746298695 | 144.954155897343 | 236.178265404264 | 235.723799298966 |
|        | 263.832968124343 | 330.096171705212 | 180.502282381416 | 366.998712124711 |
|        | 364.337811621248 | 198.056931905227 | 288.687391623935 | 316.548339196872 |
| ERICH1 | 119.434418653131 | 153.515845356859 | 169.951840840983 |                  |
|        | 205.021644155954 | 269.113996642102 | 189.451890957713 | 208.504992019122 |

103.530430972911 102.648943280704 91.2016867646161 129.005213737493  
 128.230543301378  
 ERLIN1 43.1805016690297 52.5868047927666 67.4280399954084  
 47.6687908290818 44.0451487108213 45.0882356578404 43.6753843488695  
 42.8482181313226 58.7382738968248 64.3383155834968 58.0800636554122  
 64.1607001437806  
 ERLIN2 61.0278709944136 59.5080588072694 75.8779316255794  
 60.0765286625112 72.8868488438309 62.3102413989199 66.4258159334241  
 81.0057400164851 59.7118480874431 101.036327583799 92.4896666046729  
 87.9638809147835  
 ERMAP 55.5751438859404 53.9634127270611 66.3188075271379 43.7540438144592  
 57.0504111569238 50.6360662655392 54.4313108506244 45.5581356216957  
 57.678188678075 74.0614295574729 65.088713927995 57.934622029119  
 ERMN 40.8681871019812 40.716553247236 38.4428081526233 41.3027031037343  
 40.6258566559207 41.7196307387855 39.2809305246091 38.3194261431961  
 44.3734692860793 40.3519145017156 41.9908237694988 42.8263096141654  
 ERMP1 111.522812019895 76.1682394916873 70.56368853915 45.5869891570251  
 116.099186392258 46.8954576545929 70.3935694362568 166.535245140901  
 135.592113666246 132.107655569343 154.355197155161 223.267781866783  
 ERN1 76.4983049841207 86.5414905689606 85.8945498067934 233.294970051779  
 101.46584765758 71.6694991209816 96.5030525416431 115.691017747672  
 127.034476771265 72.4834467838798 73.1262465119304 64.6194898810562  
 ERN2 45.4799270968969 47.8400694856726 101.2615980834 38.2041059863839  
 43.7517118200398 42.2577689927563 34.9344532055397 45.4757965005055  
 93.0888239577809 55.1089864632456 53.7475011049549 45.0985088502363  
 ERO1L 369.258587948416 244.529657015078 358.779372054826 238.246319539302  
 201.456613927613 80.5478617156852 179.522572239758 153.544554979202  
 424.87896140215 126.470889051684 115.761674855716 220.938982373755  
 ERO1LB 43.4100411978366 45.5842286511645 60.5678281953819  
 43.4877740913713 42.3536549114165 51.8103411703261 40.2601451506332  
 43.2890595186135 43.3744503319109 47.611018474151 50.1649089793069  
 58.5478485621444  
 ERP27 276.795797048951 139.758805241617 131.882285871258 72.0694688774804  
 147.704325041249 58.5530199658661 559.9670724278 891.080174768895  
 341.535750991033 219.616289279562 392.409679550956 193.676161965973  
 ERP29 954.116675685628 1269.36837611919 1105.00321488322 893.185203928127  
 1071.64675274806 796.359355922952 1366.59129560817 844.431085166353  
 1981.03929621057 1261.91478863258 1242.75259587926 1194.10154988793  
 ERRFI1 960.526372655577 822.822769402853 555.044139654886  
 445.644244692294 626.749986744506 919.542051089664 684.238999553691  
 1440.41726370246 693.727004855319 323.095468495074 360.15483218921  
 309.994784298282  
 ERV3 84.7058085717914 126.69706456173 65.9476039189301 52.3004056941891  
 234.873589896708 80.099836448859 92.4534854832186 322.594259063038  
 68.4229528414965 57.9713749600418 51.2318935933116 54.5921287593554  
 ERVK6 42.5193208629123 41.9894412416874 41.528370959196 51.5913529948887  
 41.3755760434934 43.1826328292558 39.0458123429605 42.357910063876  
 43.1805016690297 40.2112371512838 40.9157352260901 43.7672102682067  
 ERVWE1 63.4610447573417 43.3972849968032 45.9227107476843  
 45.1151758109609 48.1986674201502 45.9266745571724 48.5361215129944  
 45.4352530863365 53.9287524861617 46.8292269513767 45.390192977585  
 41.1554481567603

|         |                  |                  |                  |                  |
|---------|------------------|------------------|------------------|------------------|
| ESAM    | 166.511915820497 | 168.225699005719 | 294.372319595103 | 181.200738629391 |
|         | 113.866742186841 | 160.234018459018 | 79.909124697198  | 139.177720567217 |
|         | 49.641159251878  | 72.0443425395404 | 110.334176022265 | 94.3953345963359 |
| ESCO1   | 41.4508241771315 | 40.3384318592985 | 41.6079958749402 | 45.8844325913247 |
|         | 43.3332476888305 | 45.3882138838137 | 46.7100796279384 | 56.9299697426319 |
|         | 64.4098139218465 | 45.6868589181768 | 47.3791873993182 | 49.3087627580849 |
| ESCO2   | 36.4564050256915 | 42.2577689927563 | 39.6451483836089 | 35.9521941716188 |
|         | 40.0599807618105 | 36.2768299545794 | 42.7431359850339 | 37.9837233601316 |
|         | 38.5252456306656 | 40.2112371512838 | 40.6373400186325 | 37.1747156131306 |
| ESD     | 218.245471601353 | 178.858202962948 | 204.862161704394 | 245.769212889294 |
|         | 207.18510695093  | 494.162646055732 | 154.132233967972 | 183.887843429281 |
|         | 164.642060754649 | 284.868613843826 | 259.43283734195  | 444.858305070415 |
| ESF1    | 36.8072833828297 | 46.7591817286632 | 43.3085358214154 | 39.2780515621926 |
|         | 38.4540849632254 | 42.9695585740813 | 38.941855825269  | 38.6454098044474 |
|         | 39.3750969348308 | 43.6033221838149 | 44.4688999098904 | 35.0222940937513 |
| ESM1    | 191.771063132796 | 128.146059846414 | 148.32293918881  | 44.265834798964  |
|         | 88.3954618645976 | 41.809704036355  | 44.8643898647322 | 47.7508139534968 |
|         | 69.1564181547342 | 43.3465699185405 | 39.0788811357542 | 38.8132170743603 |
| ESPL1   | 76.3933911546385 | 75.2824161164996 | 71.8706847571669 | 84.0899854321388 |
|         | 84.0996028277101 | 66.295597720304  | 114.526825145076 | 147.875578127733 |
|         | 98.3798838151482 | 57.6791750431251 | 52.5930185400362 | 63.9371474698484 |
| ESPN    | 94.080489738662  | 45.3486182278177 | 54.1637401903523 | 45.1944222548351 |
|         | 46.0043807840705 | 43.2805590023412 | 67.6767845246581 | 64.3284163241986 |
|         | 88.6368226476614 | 46.7646877499666 | 43.4709415392696 | 47.8931773060789 |
| ESPNI   | 48.4849194706125 | 40.9731067463382 | 44.6032218589199 | 46.4555908533915 |
|         | 40.9950639693255 | 42.750861693377  | 33.7574445386307 | 37.2237132058632 |
|         | 40.6957787921451 | 54.8979897528792 | 48.6184776976167 | 48.6037684272115 |
| ESPNI   | 38.304249186058  | 37.920964499903  | 33.9435456570176 | 38.3166554965434 |
|         | 38.4540849632254 | 34.9849896310235 | 38.1793598983615 | 36.7460922671619 |
|         | 40.6957787921451 | 36.5806287103157 | 38.1835938174625 | 45.2783024981315 |
| ESR1    | 64.9367707455078 | 36.7976562409506 | 42.3536549114165 | 63.4531374125233 |
|         | 41.0885562160946 | 84.9099930524863 | 36.9355798143571 | 61.9787117490846 |
|         | 65.7321440516177 | 90.5603308057889 | 58.8188963227059 | 54.293880614303  |
| ESR2    | 40.8091178323174 | 52.0268699306396 | 44.6511073781104 | 43.3078542962968 |
|         | 43.3332476888305 | 42.4580504587581 | 40.7376840028647 | 48.5681478665796 |
|         | 45.5779686360641 | 41.8613406887824 | 48.3847843498476 | 39.8497227447888 |
| ESRRA   | 125.786923817078 | 165.160683489444 | 125.794379028627 | 106.582060920252 |
|         | 244.837105178705 | 104.305801811472 | 136.062864107443 | 148.770228614661 |
|         | 166.648551193168 | 173.391542207362 | 161.526970033915 | 136.355036262681 |
| ESRRAP2 | 78.1313732870053 | 117.835389983392 | 97.0516272072238 |                  |
|         | 65.524821699432  | 187.767803297395 | 73.8105012820769 | 99.9896394343368 |
|         | 141.261334415286 | 93.4980947651211 | 113.388372364837 | 101.434947182387 |
|         | 88.1733775711738 |                  |                  |                  |
| ESRRB   | 43.9309845324767 | 43.1805016690297 | 39.3709357615493 | 40.4359177791566 |
|         | 47.3172462673426 | 46.7800033479223 | 46.0228732507872 | 45.4757965005055 |
|         | 44.5303781239209 | 42.2614524730856 | 40.547835538778  | 48.1627097465883 |
| ESRRG   | 39.6349162264993 | 41.6972107715212 | 46.0727230219512 | 39.2320896829616 |
|         | 42.8414096678708 | 46.3150221024046 | 50.2016912396771 | 41.6825727187466 |
|         | 56.0121021290387 | 49.904979214379  | 46.7386599624801 | 43.9541718254769 |
| ESSPL   | 36.0144420013819 | 36.1232327599945 | 35.5220586859301 | 40.9607305725196 |
|         | 37.3508690072156 | 32.325260431418  | 31.098971689775  | 33.7818132446042 |
|         | 39.2809305246091 | 39.8873706855774 | 37.0180934800573 | 35.9604262434141 |

|       |                  |                  |                  |                  |
|-------|------------------|------------------|------------------|------------------|
| ESX1  | 41.1523487516364 | 39.0102066700839 | 43.0016969050339 | 43.3078542962968 |
|       | 41.6806984441849 | 37.4782441311626 | 41.0381860307445 | 42.357910063876  |
|       | 39.1790517315259 | 35.3849221682845 | 39.8184668132023 | 40.5703581862752 |
| ETAA1 | 34.5886782974123 | 47.8400694856726 | 37.0642268327439 | 37.651298468202  |
|       | 43.5544347011646 | 38.1169703906207 | 41.253645578517  | 46.4672637826582 |
|       | 45.3756389170606 | 39.1621898366355 | 41.7272875295469 | 36.1647506311964 |
| ETF1  | 271.008929897376 | 127.82585786161  | 146.997252473598 | 309.39599482851  |
|       | 167.578081645481 | 281.602712448925 | 174.007271403635 | 295.127975044241 |
|       | 181.45962058846  | 284.013140015092 | 241.849566505679 | 297.662970257144 |
| ETFA  | 493.322302312578 | 979.468753716758 | 586.026364123617 | 467.645011859047 |
|       | 1387.28483887704 | 603.737787922337 | 637.035929429013 | 419.054753590648 |
|       | 1223.01485352248 | 246.568253751149 | 386.170232791927 | 721.266942608349 |
| ETFB  | 166.129723762515 | 366.326747630465 | 512.691506909762 | 216.45007990575  |
|       | 394.990145259101 | 309.593721653575 | 332.184073392054 | 270.303708972854 |
|       | 491.100053064936 | 335.943994595615 | 370.917477324773 | 308.393270347486 |
| ETFDH | 89.9580440276828 | 151.601402122351 | 221.743315748689 | 120.436827608155 |
|       | 120.309345127552 | 159.071016200059 | 117.439175394651 | 92.804679821289  |
|       | 173.582309251499 | 113.546568515215 | 180.398903465014 | 216.45007990575  |
| ETHE1 | 44.5282181324797 | 43.3458769998118 | 45.6989664108554 | 41.7614975630362 |
|       | 58.037539503209  | 45.6129956328415 | 50.3519150282938 | 48.3590401011623 |
|       | 51.7549258776884 | 43.6033221838149 | 47.9942520395434 | 50.4847465816184 |
| ETNK1 | 51.3331184755498 | 59.1570467228834 | 61.0935621637178 | 83.5320423407318 |
|       | 57.4709287098477 | 47.2927436772465 | 63.3924515518667 | 68.580705761277  |
|       | 66.5141009463313 | 52.022479439889  | 51.0013344286851 | 55.117521379579  |
| ETNK2 | 70.2541961995753 | 54.4793574349739 | 89.1115172961797 | 47.8164193292842 |
|       | 50.5110359971301 | 47.0027453663546 | 54.9765783642973 | 67.0904616289706 |
|       | 74.4958282816601 | 90.1696131791736 | 75.3075812535743 | 71.9369353731849 |
| ETS1  | 376.931257615162 | 537.471287449696 | 506.585006700107 | 638.305455110267 |
|       | 200.174103125152 | 199.181938253995 | 161.573327074375 | 337.51861578231  |
|       | 208.804071011518 | 448.383843915421 | 564.19772079287  | 512.951288394692 |
| ETS2  | 278.378459771943 | 1184.75786736273 | 1137.99307039386 | 1566.12726152736 |
|       | 411.431488342465 | 959.549658414082 | 665.122091380755 | 596.384327208699 |
|       | 1020.75813028358 | 403.796135347069 | 538.153124145211 | 792.022171185649 |
| ETV1  | 37.8386378737561 | 31.3542159583213 | 36.3604951341921 | 39.9697332660833 |
|       | 38.9496515344837 | 40.4359177791566 | 34.2773859804062 | 39.9576138799997 |
|       | 40.3316153483289 | 39.8873706855774 | 36.3390947880186 | 36.6603338274678 |
| ETV2  | 37.55264801907   | 41.6466169548846 | 36.9795961564828 | 34.5425384901279 |
|       | 35.9058393060637 | 41.6590564937735 | 36.7356360093603 | 40.7311497914871 |
|       | 43.2761454096265 | 33.5412189543102 | 38.8507804383261 | 39.4490233720848 |
| ETV3  | 56.3471340054074 | 69.5544840164738 | 84.2385359528743 | 68.6379135603075 |
|       | 73.4535007027931 | 51.6053353177789 | 71.193768715137  | 113.277043026153 |
|       | 53.1249776278067 | 56.4553747079294 | 58.8961770381033 | 39.6352613956998 |
| ETV3L | 40.8681871019812 | 36.0366673493555 | 41.2365089689635 | 40.4359177791566 |
|       | 37.4470183315826 | 40.8634043028528 | 38.6243997507646 | 40.7311497914871 |
|       | 40.137818555383  | 40.2112371512838 | 37.3687900733549 | 39.3575468494941 |
| ETV4  | 113.491158368594 | 76.375769561992  | 52.8041782638549 | 43.074472921841  |
|       | 91.9685593100867 | 48.8744644207821 | 72.6959688212342 | 77.6174893940285 |
|       | 173.391542207362 | 46.3810615657263 | 47.4630625313159 | 98.1220820761255 |
| ETV5  | 158.532307373857 | 64.7650773032999 | 67.1729762600915 | 122.702789229752 |
|       | 106.527144354592 | 107.682738819549 | 85.7299543466172 | 62.1934012861178 |
|       | 129.909461876076 | 91.0346886951891 | 72.6450859740011 | 90.689813277023  |
| ETV6  | 174.492066109537 | 148.879760620316 | 126.981964766008 | 207.087723777954 |
|       | 140.598583034034 | 114.389392280707 | 286.291779906932 | 225.50098418159  |
|       | 245.060552951511 | 208.67074469962  | 156.69976952483  | 248.691595276298 |



|       |                  |                  |                  |                  |
|-------|------------------|------------------|------------------|------------------|
| ETV7  | 46.6348258763289 | 58.5406981871153 | 62.0967404944031 | 48.856176220627  |
|       | 69.0975200641705 | 40.9506062495231 | 57.51482768194   | 49.9332280449549 |
|       | 69.1129431075514 | 61.4569050766419 | 54.4825201506931 | 56.9379721393904 |
| EVC   | 78.7450149191851 | 43.5873188565519 | 50.8601672542371 | 42.7613994022988 |
|       | 48.6707521528908 | 66.4399491500833 | 49.0497778708674 | 46.7980335276155 |
|       | 40.9423087727566 | 64.428683021978  | 65.4589642146912 | 56.6146179789815 |
| EVC2  | 46.263826584899  | 49.83247261979   | 48.4890615340603 | 51.7739270955254 |
|       | 49.9493230064613 | 50.0748292497578 | 49.8281348927244 | 41.7419877611072 |
|       | 51.6731332961917 | 57.2813205536176 | 54.6089451252049 | 49.8253396161069 |
| EVI1  | 103.945335792682 | 1342.10592868516 | 1529.52516575545 | 174.860894067053 |
|       | 692.630044242985 | 322.109212713082 | 768.354209323884 | 448.196293409768 |
|       | 1236.32289322872 | 1501.67042548971 | 1817.14004766564 | 1307.19925493293 |
| EVI2A | 62.1448806673973 | 49.2443202281556 | 46.2028394323277 | 188.156490868789 |
|       | 43.7517118200398 | 56.9621724830201 | 53.7423898357583 | 44.797320243931  |
|       | 43.0342930070984 | 45.8424887733913 | 44.6734266378263 | 50.0571060701893 |
| EVI2B | 76.3933911546385 | 95.2292899846287 | 80.815808403022  | 496.791391622565 |
|       | 60.2886873195135 | 92.7427427543974 | 91.5258329186709 | 52.8264142735929 |
|       | 47.1744296124496 | 50.007830364606  | 50.5381435455868 | 56.6146179789815 |
| EVI5  | 199.858233616116 | 121.432592327754 | 147.858425171297 | 203.979798245524 |
|       | 110.869341159607 | 109.352296288717 | 147.321968565095 | 294.567137562864 |
|       | 108.42710653018  | 214.03015073442  | 254.639522735592 | 187.462631817772 |
| EVI5L | 119.095094052197 | 92.1646038105091 | 234.778900405354 | 99.5958921252583 |
|       | 212.353676518748 | 170.172720177618 | 73.8313212063649 | 101.681822254799 |
|       | 165.311139930529 | 115.509409633975 | 126.375315221007 | 112.113501370522 |
| EVL   | 744.762787024945 | 532.981045084589 | 861.427193617946 | 669.419736252343 |
|       | 548.217757366495 | 688.168272082335 | 516.213108543512 | 608.005012673672 |
|       | 522.49156295512  | 624.51670158046  | 714.075528895169 | 434.523449093691 |
| EVPL  | 277.936167684143 | 720.552354470517 | 560.878675769733 | 51.223859150798  |
|       | 516.848416430243 | 117.907440794926 | 410.058119360034 | 454.402224020514 |
|       | 422.817392818858 | 510.675912282067 | 391.187784616808 | 287.184421338984 |
| EVX1  | 36.6480005877129 | 31.0594903826598 | 36.1042012504758 | 36.7892997857376 |
|       | 37.2567512265363 | 44.5544727111028 | 39.8695929627783 | 43.5544347011646 |
|       | 36.6312676076142 | 36.5806287103157 | 35.6041926503637 | 40.0557788909923 |
| EVX2  | 34.3473914754963 | 35.5012138354521 | 39.1480645318984 | 35.4355497822498 |
|       | 38.4540849632254 | 38.2971553419489 | 38.7337086062875 | 38.9074189954657 |
|       | 38.5252456306656 | 41.4397539024976 | 35.8150308232314 | 34.8510844670321 |
| EWSR1 | 428.958127252533 | 603.224267841548 | 339.52415679299  | 355.568857981155 |
|       | 416.717470974721 | 398.049525642349 | 615.442484911026 | 402.221227674218 |
|       | 576.830397705584 | 429.725397949276 | 463.84209540456  | 369.451882513347 |
| EXDL1 | 46.6348258763289 | 39.9697332660833 | 36.6522278218553 | 33.5578650644246 |
|       | 42.269054475455  | 37.5887129572848 | 37.830876898596  | 36.5393857306744 |
|       | 37.8319142847141 | 38.4187686307607 | 38.745552403895  | 42.0424641526302 |
| EXDL2 | 193.981651711507 | 131.537639104397 | 175.271140689255 | 133.1387411908   |
|       | 149.551650453179 | 179.285390561592 | 158.321459945365 | 114.959624673123 |
|       | 186.042094228091 | 166.734730009916 | 162.352052340273 | 178.060342847557 |
| EXO1  | 48.3556695727124 | 55.6972661824064 | 50.0445602878169 | 42.7613994022988 |
|       | 74.3523005665671 | 42.6187506958386 | 72.8653205184014 | 66.8364940429355 |
|       | 69.6511571901941 | 41.3735882187951 | 39.7342718293432 | 41.9721968713295 |
| EXOC1 | 75.1328739717464 | 78.3488426553071 | 116.547937420457 | 84.5678487053881 |
|       | 79.5175547131776 | 84.056083317311  | 65.1757400078647 | 69.2787430208317 |
|       | 84.5678487053881 | 72.2443746456494 | 77.0395487594084 | 84.4349803529132 |
| EXOC2 | 100.891869710611 | 96.1710806345503 | 99.8231023149756 | 96.5813769696577 |
|       | 128.844013736935 | 99.6821042055758 | 69.8505620106065 | 68.0342444360948 |
|       | 75.6614221167993 | 105.009081898873 | 96.8490167966217 | 102.971363152434 |

EXOC3 257.325282051981 197.232697438521 178.904972763325 236.242651711871  
 461.258911881166 335.655540947167 375.818861583151 228.026217504784  
 220.398778650109 292.800712773283 323.453481668415 167.639975497722  
 EXOC3L 50.0466349801009 45.0905928998779 53.5698357689852  
 50.5310598656998 44.0451487108213 43.6670755115848 39.8695929627783  
 40.831207953647 47.27543600687 47.1001757441025 48.5292718280498  
 43.0930293831497  
 EXOC3L2 43.1805016690297 46.6996902348633 50.9010149857308  
 42.6913548400127 40.2449343247539 38.4330755397458 38.8417151851134  
 44.0390019242862 40.2274522635576 43.844855336215 44.0409178714232  
 40.2669497398702  
 EXOC4 60.7595361363354 66.991625911443 72.3508448479791 64.6945454069792  
 65.6003544901554 58.2108487642117 66.6894494536346 65.7536901239228  
 77.6052681514721 72.5153335566211 79.7020636215451 74.2984889814139  
 EXOC5 55.3153799233744 60.6080172588224 44.8872784170036 57.0629653735694  
 50.2163892855092 56.6172748471831 44.0687697278114 49.6203214143464  
 61.3733228199803 65.2361525412756 55.6151308605445 52.3896785600751  
 EXOC6 51.1347974668251 60.7495043977707 51.1347974668251 66.4510869175159  
 54.1731035633439 52.902043370862 66.1940959364976 58.2043532960091  
 59.0850755856409 57.165971310746 59.897987870592 57.9941756686635  
 EXOC7 360.668308246913 303.139550962377 326.250872625748 163.126491735808  
 295.848968688724 253.980053738171 321.61848221455 274.259417498569  
 342.643344197936 329.978705095448 228.615793354146 234.727123301682  
 EXOC8 40.148780650831 46.3635803515159 44.6032218589199 42.0102671859606  
 42.7982502551634 42.5660695551615 39.1539892144371 40.3357777530419  
 42.0621425894624 41.2276963324981 42.2618615571566 33.6902293666089  
 EXOD1 43.5710871617107 44.8529259387308 59.4431489877328 46.1673159982664  
 43.5544347011646 45.2852528185486 46.4388841354122 54.0507720792049  
 42.357910063876 47.9056710878325 44.7926323492519 40.9683275553869  
 EXOSC1 158.590601962928 214.586915093492 285.689076149891  
 235.294634126766 253.207750345072 216.699423864285 239.96421556928  
 249.995119246929 213.380798420955 202.667616796658 198.432987946699  
 241.849566505679  
 EXOSC10 207.0155359394 228.499788774214 223.911125639211  
 176.594203350958 307.656792056993 210.958578914607 292.247095517604  
 256.165801611585 242.966185793816 177.55994726993 214.369365247268  
 180.255771684507  
 EXOSC2 75.8122107270212 105.563773939475 74.4508307047509  
 73.1447139654971 91.0327980861321 112.23915619297 161.439879456216  
 80.2680308979464 107.961407367823 88.3335649692467 94.6300022444815  
 82.3254961129575  
 EXOSC3 206.571946834892 184.808179948172 92.2095095678497  
 148.333778341005 275.314994786888 161.948193932343 277.367257933324  
 117.547659489742 161.768763813052 116.891649452816 148.964204638494  
 186.372887375058  
 EXOSC4 207.943044411392 177.067668324062 123.908152883436  
 117.071280682786 301.728842562175 126.319731178054 155.239308003808  
 120.850874262069 195.968119243879 85.8795177524168 100.774098314706  
 79.7238173467616  
 EXOSC5 199.079207384598 198.652987129375 208.67074469962  
 140.662969373546 503.661461720233 166.734730009916 353.463970335835  
 268.936151471133 298.988745247509 173.5606219477 181.912232315225  
 167.319747725488

|        |                  |                  |                  |                  |
|--------|------------------|------------------|------------------|------------------|
| EXOSC6 | 293.355303451014 | 531.69595054137  | 648.885062676884 |                  |
|        | 217.575115287224 | 318.609131605258 | 279.841798764418 | 407.818713538416 |
|        | 773.781266760336 | 399.21864362319  | 334.583159766096 | 316.917793468502 |
|        | 306.174148874454 |                  |                  |                  |
| EXOSC7 | 170.450752247109 | 260.581111456578 | 220.398778650109 |                  |
|        | 181.983177572371 | 413.067407579649 | 209.467874193952 | 226.926786963011 |
|        | 203.109765192983 | 328.295200683554 | 208.22938545273  | 257.506228440451 |
|        | 295.194516063502 |                  |                  |                  |
| EXOSC8 | 106.804269453898 | 119.088986733238 | 110.302475164041 |                  |
|        | 105.934378627264 | 117.689172019617 | 134.375403847987 | 170.327588764719 |
|        | 110.599131324937 | 182.643498505575 | 123.704998437432 | 126.920579478593 |
|        | 139.472956453414 |                  |                  |                  |
| EXOSC9 | 68.3234331335073 | 80.257554904218  | 68.6566757444066 |                  |
|        | 86.7823828209946 | 81.1416376689959 | 84.2880616879945 | 95.6697427870979 |
|        | 78.3542840447759 | 74.4623288220969 | 73.1407519625966 | 73.9126724639466 |
|        | 81.7566533443175 |                  |                  |                  |
| EXPH5  | 45.6517320730042 | 50.8812920005251 | 47.0940613507321 | 38.6414316877471 |
|        | 45.8051846088552 | 40.5281496800812 | 56.6537562775715 | 51.1694248620208 |
|        | 42.4540072551568 | 47.4767851750188 | 50.5188367542048 | 46.7182294568603 |
| EXT1   | 222.426799131736 | 213.830284761604 | 270.156612086731 | 155.287591646469 |
|        | 337.736535374405 | 159.747484721905 | 143.497887869284 | 156.719353642505 |
|        | 326.250872625748 | 206.989423961124 | 197.720854621428 | 294.220232101389 |
| EXT2   | 87.5759422500374 | 98.4930941487534 | 103.010279797396 | 86.5414905689606 |
|        | 90.5860767851498 | 100.087328133967 | 73.3042538589134 | 98.5828998914961 |
|        | 86.503774181307  | 98.2180003781859 | 93.4494731509092 | 103.010279797396 |
| EXTL1  | 50.315768338317  | 41.2598458726002 | 43.3085358214154 | 54.8412943008635 |
|        | 47.4548471240051 | 43.8582747295766 | 51.1541843174981 | 43.9366081640576 |
|        | 45.0017158586743 | 55.9283039581662 | 47.0940613507321 | 39.8497227447888 |
| EXTL2  | 129.525395445221 | 111.581224629293 | 122.052907748249 | 66.3188075271379 |
|        | 101.2970835312   | 135.527591897994 | 84.4045322633219 | 76.5532859161089 |
|        | 78.2393202422664 | 95.65872032796   | 103.14577985944  | 103.876328830067 |
| EXTL3  | 160.566474370004 | 95.6662924228901 | 134.725028732282 | 127.986477405999 |
|        | 108.063001800611 | 158.843766201769 | 92.6545309624315 | 86.2118355769367 |
|        | 108.815245119101 | 176.506718222092 | 173.328468320432 | 136.355036262681 |
| EYA1   | 40.7063426028871 | 39.4569929845912 | 38.9790184198145 | 39.4637566422506 |
|        | 40.1207285185295 | 40.9506062495231 | 39.4600924554505 | 39.8812234363661 |
|        | 38.7537364570873 | 42.785429206422  | 40.1422119692495 | 41.5916331278821 |
| EYA2   | 57.0504111569238 | 57.6634521289201 | 115.761674855716 | 44.6286581923295 |
|        | 43.0826863247766 | 45.017247592678  | 51.4349390827895 | 69.9984754033658 |
|        | 155.287591646469 | 60.0856496605043 | 54.0669061445608 | 53.8803543493797 |
| EYA3   | 45.9504618460054 | 43.0227387991135 | 52.8427643366617 | 54.9765783642973 |
|        | 74.8893925448138 | 43.8582747295766 | 56.5914743235484 | 68.4261608261522 |
|        | 53.5677764726461 | 42.0217776707284 | 47.396715991429  | 45.5435778478662 |
| EYA4   | 39.266565827316  | 41.2176232897704 | 39.7683846616421 | 49.7350276169552 |
|        | 42.2331334096358 | 57.5398008565764 | 39.2809305246091 | 42.8036731479932 |
|        | 39.5377896745682 | 43.0919221375514 | 48.7049943037859 | 46.2072687763147 |
| EZH1   | 49.7188990489616 | 43.1805016690297 | 49.4573631027613 | 59.0965219753805 |
|        | 47.8075998240396 | 52.1024135605001 | 47.4439407315335 | 45.9604707098953 |
|        | 48.0163377492228 | 52.8928296360463 | 49.7363778831003 | 46.7182294568603 |
| EZH2   | 63.0266170942566 | 73.3395284923099 | 66.9239565096247 | 67.2714646016644 |
|        | 83.0497574039035 | 45.1873487463472 | 99.1769280484821 | 56.032814067931  |
|        | 115.414481087246 | 41.1222709786153 | 40.5750645132377 | 42.7303139017786 |

|       |                  |                  |                  |                  |
|-------|------------------|------------------|------------------|------------------|
| F10   | 39.8662795144616 | 40.6380495994768 | 40.8420925848403 | 44.0451487108213 |
|       | 37.4470183315826 | 291.232601825013 | 40.6750540874299 | 39.853866204927  |
|       | 34.3842972343227 | 131.380698046552 | 94.2275161759277 | 57.445796273665  |
| F11   | 40.308802735799  | 42.2114134935898 | 45.3675390992851 | 43.367124590178  |
|       | 43.7517118200398 | 40.5805725503899 | 44.2166118829877 | 39.3113207075992 |
|       | 44.0256815382334 | 38.957687788868  | 43.2551508830106 | 44.0451487108213 |
| F11R  | 68.8698243753339 | 88.2427413480277 | 85.3718124658316 | 73.5834042105313 |
|       | 79.7238173467616 | 49.0497778708674 | 75.5830548489892 | 73.0855167819246 |
|       | 199.404836798715 | 103.343354834837 | 85.2598847559951 | 102.49785018292  |
| F12   | 58.3702889417801 | 73.845912534353  | 76.5699943825825 | 55.6481366056639 |
|       | 218.958199087236 | 56.1671440556142 | 87.6018870099686 | 111.404796541459 |
|       | 186.67069792963  | 56.5379973844443 | 60.6505672212119 | 90.9361642101537 |
| F13A1 | 77.6056319020116 | 150.114520857436 | 179.040571908629 | 132.205423909251 |
|       | 94.3450965454031 | 521.874349042344 | 76.7483302168542 | 75.3462586192013 |
|       | 47.3791873993182 | 80.6634117492762 | 65.6010220593397 | 196.709620264975 |
| F13B  | 37.6397652536077 | 41.8073910693411 | 38.0452862258803 | 38.9534635879195 |
|       | 36.7356360093603 | 41.159706131351  | 41.1507980856436 | 40.931294690669  |
|       | 34.0382693188794 | 35.8304004211528 | 38.1835938174625 | 38.3291713594599 |
| F2R   | 11176.402230735  | 7681.71833395626 | 9060.10165509099 | 8259.38594893529 |
|       | 6749.14636741447 | 5018.90384962952 | 9852.7965902602  | 10072.2414399735 |
|       | 6873.84878164654 | 9488.06491634484 | 9060.10165509099 | 7627.46814033012 |
| F2RL1 | 115.321592104747 | 134.099684731177 | 111.465167479654 | 85.1847490113446 |
|       | 83.1225347811557 | 46.0905079010237 | 127.148417780972 | 124.94083215058  |
|       | 209.178131628825 | 229.26498093497  | 214.127390534906 | 393.648308810931 |
| F2RL2 | 39.1059888887285 | 41.8073910693411 | 38.5045333213784 | 41.7614975630362 |
|       | 40.6308525754377 | 35.5523662009011 | 40.0603121770344 | 38.956280281655  |
|       | 36.8127605061228 | 37.6637152940566 | 36.5359455830388 | 37.3600014814388 |
| F2RL3 | 48.2549905619119 | 48.0296332183129 | 54.3554233228353 | 54.6089451252049 |
|       | 50.2953638261991 | 43.1180113655693 | 47.2927436772465 | 50.8160430472218 |
|       | 48.8067321016961 | 47.9707112435212 | 46.29198852834   | 45.3763275588341 |
| F3    | 52.9849979441253 | 53.0383634135393 | 47.2505395290129 | 60.4007755900733 |
|       | 108.337776546183 | 72.4651758215622 | 36.03517591974   | 99.1438953564062 |
|       | 61.3216070188812 | 47.0055981216687 | 73.155721596638  | 55.7802841481067 |
| F5    | 43.9309845324767 | 39.5050383901884 | 43.9450023643394 | 74.0093517743852 |
|       | 43.4544762830742 | 38.6414316877471 | 110.589130460258 | 45.5581356216957 |
|       | 45.2897806651929 | 52.2256177934134 | 63.0763092522598 | 53.2046867327331 |
| F7    | 39.2958230580497 | 41.6972107715212 | 42.2857372794461 | 41.0726336841311 |
|       | 37.5044776781216 | 40.5710637884029 | 42.106632087165  | 40.781946829774  |
|       | 37.6383530120621 | 43.119837808537  | 38.6322728994674 | 40.1249533205858 |
| F8    | 42.442231667357  | 41.3366779545815 | 41.1367478979484 | 42.5321207892864 |
|       | 44.0920305031178 | 51.5522731200852 | 40.0676341303791 | 41.6045220683604 |
|       | 43.7078399718247 | 42.1317134987795 | 45.4799270968969 | 47.0775611502299 |
| F8A1  | 153.384919558071 | 94.0532777456537 | 108.700838142885 | 133.541341560868 |
|       | 217.293240552946 | 103.343354834837 | 158.769954040462 | 127.418173390084 |
|       | 186.965367827758 | 115.509409633975 | 109.076358658606 | 92.8006484232438 |
| F8A3  | 50.9381343674699 | 53.0063130674306 | 52.8041782638549 | 45.8145523469421 |
|       | 56.8307116636372 | 45.4607426241257 | 47.2927436772465 | 42.3887531663733 |
|       | 46.7414272831181 | 40.1613888954735 | 45.4799270968969 | 43.6753843488695 |
| F9    | 46.8141313516997 | 41.0678614026819 | 47.9035532886869 | 42.0102671859606 |
|       | 46.0977687311222 | 54.9108046955355 | 49.6872467499977 | 49.5185112777773 |
|       | 44.8003345643334 | 46.2286164776607 | 44.553780984244  | 45.1735152121056 |
| FA2H  | 44.436995101921  | 61.8492980174846 | 59.9690744676539 | 35.8472302065546 |
|       | 41.9842695818285 | 40.650742261428  | 63.7721358300879 | 90.716460692818  |
|       | 78.055431384988  | 42.6793753550854 | 50.6473771879221 | 49.5539622682049 |

|         |                  |                  |                  |                  |
|---------|------------------|------------------|------------------|------------------|
| FAAH    | 165.775214685061 | 123.768417863139 | 101.693848821246 | 43.5627649099623 |
|         | 125.052841200703 | 45.6129956328415 | 160.917024416961 | 229.47693624489  |
|         | 208.023488988931 | 209.860757709908 | 219.64979849407  | 145.14768503072  |
| FAAH2   | 41.2424637338424 | 59.4253780950488 | 52.3432130135266 | 35.8472302065546 |
|         | 42.1650127805175 | 41.2567470068038 | 44.9863726205428 | 45.8669209716694 |
|         | 61.0094935318105 | 68.2708120569221 | 61.7572675712557 | 54.4992295592001 |
| FABP1   | 38.6454098044474 | 39.3999056968598 | 37.2838080935695 | 44.4367387274922 |
|         | 40.2449343247539 | 44.5544727111028 | 40.6750540874299 | 44.1311654985682 |
|         | 44.4395580493118 | 46.2286164776607 | 39.3667161654772 | 44.5432192783161 |
| FABP2   | 47.4678477186801 | 40.9731067463382 | 45.989212296035  | 52.3004056941891 |
|         | 43.7517118200398 | 45.6129956328415 | 40.5585676679482 | 50.3972033014227 |
|         | 42.0621425894624 | 50.8826620053386 | 42.7275315121163 | 43.1805016690297 |
| FABP3   | 42.6036491382658 | 37.7384958256497 | 35.2838283525874 | 35.9521941716188 |
|         | 35.3327761997046 | 45.9266745571724 | 43.3262148375525 | 39.2672712041774 |
|         | 37.4540772310118 | 41.8613406887824 | 43.9450023643394 | 49.9692385479389 |
| FABP4   | 34.8099089553046 | 67.2649356062263 | 228.134171304754 | 43.6726153508978 |
|         | 45.3675390992851 | 175.028390974125 | 37.2892641289258 | 84.0899854321388 |
|         | 91.8414653633828 | 485.698327133705 | 416.40156274382  | 1243.32650314893 |
| FABP5   | 56.5319193881205 | 1604.80031304031 | 986.40790007743  | 207.833867050257 |
|         | 407.818713538416 | 141.69593269802  | 202.395470754957 | 104.351256270039 |
|         | 516.848416430243 | 239.792011765323 | 248.390047812338 | 508.474794786176 |
| FABP5L3 | 40.4639532172338 | 55.8046062733709 | 39.8299340037009 |                  |
|         | 49.7350276169552 | 49.7235523248653 | 42.4580504587581 | 40.3302268293707 |
|         | 44.4031868028216 | 34.8552366193358 | 46.6598879466655 | 43.9450023643394 |
|         | 50.656598108034  |                  |                  |                  |
| FABP5L7 | 42.7150227340364 | 39.3999056968598 | 44.0451487108213 |                  |
|         | 43.3078542962968 | 46.5557478175976 | 38.6414316877471 | 42.0605906240248 |
|         | 42.2577689927563 | 39.2809305246091 | 41.2276963324981 | 37.7384958256497 |
|         | 43.0930293831497 |                  |                  |                  |
| FABP6   | 66.6118713143653 | 146.087016079575 | 351.764130340952 | 41.8291484190524 |
|         | 186.54041506387  | 68.7342341724306 | 62.0404348860702 | 141.108035324183 |
|         | 229.428422408702 | 108.04376659067  | 63.7024494337186 | 90.99086730704   |
| FABP7   | 43.3638918705225 | 38.9338521051669 | 39.9101908547397 | 49.1786207920603 |
|         | 40.148780650831  | 49.9699131196797 | 41.706879587091  | 39.5466975353131 |
|         | 42.6366765186182 | 38.6454098044474 | 39.5399188536544 | 42.2577689927563 |
| FABP9   | 39.4250105372135 | 38.5252456306656 | 39.6451483836089 | 40.1362682639916 |
|         | 39.4693871570028 | 40.8091178323174 | 43.7585538437696 | 42.2577689927563 |
|         | 40.8420925848403 | 40.5571841955033 | 37.0180934800573 | 41.0226232127351 |
| FADD    | 203.53267380432  | 231.361506886859 | 255.598083334598 | 177.067668324062 |
|         | 253.764071470001 | 164.62751527755  | 271.138311888031 | 166.734730009916 |
|         | 219.34503297115  | 206.514263103112 | 185.874151272261 | 175.378964448101 |
| FADS1   | 78.1313732870053 | 55.9644250454789 | 56.2441895183416 | 241.08817915181  |
|         | 188.943404504867 | 87.0685571351947 | 270.662475158799 | 126.470889051684 |
|         | 502.32041794318  | 68.2708120569221 | 62.5036823572932 | 84.5998418020787 |
| FADS2   | 46.263826584899  | 42.7775752471711 | 43.5710871617107 | 67.7121534934164 |
|         | 60.5290966885203 | 57.8005007012205 | 97.299696284253  | 41.4508241771315 |
|         | 141.017696819844 | 45.0155543555707 | 46.8954576545929 | 42.4607795638552 |
| FADS3   | 44.0328992213727 | 38.5252456306656 | 39.8299340037009 | 37.1894304543751 |
|         | 45.4751076037511 | 46.8954576545929 | 41.253645578517  | 45.9604707098953 |
|         | 42.5406888281114 | 42.9866214102525 | 44.7114813656401 | 46.0633179231318 |
| FADS6   | 38.385865183581  | 43.0227387991135 | 35.9305494063137 | 33.8111782249716 |
|         | 34.6227169056411 | 45.4882438975269 | 32.7676164492555 | 34.3865306339645 |
|         | 37.1820543575123 | 40.8970401536578 | 38.1835938174625 | 39.2469742642337 |

FAF1 195.340273658052 136.22176708108 204.344278991396 133.86254468037  
236.791729190996 204.862161704394 206.103296228683 189.398959817735  
237.632703283663 165.706343725482 166.208731611481 152.86270446968  
FAF2 632.019639546131 302.422475486532 463.022816882856 427.281740164881  
412.421643885499 301.357530757236 397.154258378193 445.016226732679  
604.951648398924 667.583623414832 549.407911286514 561.2769907009  
FAH 104.832753086298 95.6662924228901 89.8354888041611 146.573018487871  
167.319747725488 123.768417863139 102.852046099268 128.146059846414  
158.884110481815 105.29989739819 109.844156801015 121.562769658314  
FAHD1 85.5881739836215 123.506372870621 125.27802197261 76.3693529894936  
100.114114765033 78.4815128101967 110.048921728774 58.9533374723051  
88.1910986077499 85.3057627795203 95.2915739972533 104.486555491331  
FAHD2A 52.109723558511 48.7847528954724 48.1997158668729  
48.665578118898 51.0107745412152 55.401776072578 52.4111687156893  
52.2416165827554 55.1253465069845 50.0564735608363 48.5292718280498  
51.3872161199373  
FAHD2B 158.702003835578 100.403196213407 169.557757933574  
134.567947469561 191.730944258418 173.640820092779 193.60925192949  
213.830284761604 226.580055691897 200.483228109704 265.367588517131  
197.103673938152  
FAIM 50.2203578628217 52.5645416722441 62.1642339365777 50.133362781069  
51.8446107597512 53.8461734834857 57.51482768194 49.2458645560476  
59.9326265577462 43.844855336215 46.3370338074996 55.0226286701624  
FAIM2 43.0930293831497 45.9266745571724 47.2055133646385 48.9944486068347  
40.6723334103791 148.144200968432 36.634024014558 40.4359177791566  
42.1594905198929 85.8795177524168 88.5511408870489 54.5921287593554  
FAIM3 60.6441065119394 159.463273263774 86.1563473462864 231.824347524066  
58.6481644777552 52.8421046802739 103.913834330352 108.083751469991  
51.2776048338 60.9905272201951 56.1379957867124 95.6731932757489  
FALZ 54.0170817319522 53.6429962450784 46.6588655218735 65.524821699432  
57.9161791762225 58.8605811695948 50.5252048155459 43.844855336215  
51.3511088648386 41.9666541498638 46.8954576545929 52.9609836781499  
FAM100A 164.404486294867 172.206923437536 139.620154641549  
148.255880793905 147.285007921741 154.633672616367 179.522572239758  
116.67447696188 209.31241212773 181.2179249806 211.926421068313  
100.049462976601  
FAM100B 133.067727272864 149.284007723184 125.794379028627  
215.345160952019 158.464244518317 87.0685571351947 228.185436206823  
231.893992191022 206.103296228683 109.192770642308 117.8523906126  
99.6243435693941  
FAM101A 44.6231541342 44.6918600441328 35.2838283525874  
34.9221408381038 37.6527901109005 36.1190722948669 37.9430145836712  
33.6816578730693 41.7627910693483 38.6454098044474 37.8372168909583  
38.1421709520616  
FAM101B 49.3000844711116 50.5110359971301 49.4573631027613  
53.7155925246916 52.3034212084073 52.5330333302271 42.9803717121865  
44.8727287473605 42.4540072551568 45.3894119568143 48.9184531207247  
45.9159813905292  
FAM102A 122.316617618658 79.3614922672599 68.3234331335073  
78.5141640924736 65.5468832395274 85.4429281595877 156.061711961514  
127.708268637068 116.17887995398 128.996351661564 94.7008981904016  
101.086264355915  
FAM102B 57.7877627794725 55.0897019602305 50.2869791217819  
133.1387411908 45.8051846088552 102.499011190932 72.6959688212342

108.213380368446 100.874437079608 131.645714321903 100.45351084408  
128.230543301378  
FAM103A1 104.914715637173 77.4307558516809 79.6133633483649  
94.1680559848644 117.389308836013 79.6895408438974 92.1455386560941  
105.382126899524 101.954354107731 104.824641162138 89.5887648181505  
108.007227281411  
FAM104A 229.159869771704 231.472806936915 301.457545514208  
237.237762964658 248.963785838427 235.648018909 253.980053738171  
291.5513298383 311.301613620475 317.560970617018 268.936151471133  
255.087214364926  
FAM104B 75.1701698483856 78.5174639327946 65.9476039189301  
75.4466520363487 65.6003544901554 105.414552529943 99.1769280484821  
85.2849531543957 97.4062608315831 141.386644354989 120.980558571109  
112.113501370522  
FAM105A 40.9558083259517 42.4493032770053 39.0775870687758  
42.4580504587581 57.5685357492202 51.702461863489 35.4623691645629  
39.1652965788406 41.863927676552 41.8613406887824 44.3763859390287  
53.3059058105836  
FAM105B 123.608921653229 97.8764110456132 105.376705821141  
136.644759501653 116.22441634196 85.6038071277319 185.079035617027  
98.4405692451144 140.187433247353 108.525500270474 109.677588309718  
95.9391851122771  
FAM106A 42.5534565507139 39.0102066700839 45.1569741609597  
40.0698728584484 41.467005949568 41.4508241771315 37.1643693306382  
43.5544347011646 38.9496515344837 39.7411455670172 38.079222289614  
37.9607839934735  
FAM107A 40.9558083259517 80.4822328865 111.735319884512  
97.8309399470621 67.8233625051884 1041.84536202049 35.7055410599146  
78.8250642061439 38.2215591930186 288.923207993626 658.282562295783  
264.161390133378  
FAM107B 149.933827818309 116.967446594767 142.012216533823  
397.020287751914 131.632115558243 135.985408824299 207.380865650247  
643.218735985767 192.861174667738 182.976132230487 242.932905246176  
312.469507672374  
FAM108A1 38.4330755397458 45.1390218677367 40.148780650831  
40.6892234267786 41.8806343997257 41.7256940298128 36.4098694708483  
40.831207953647 43.2761454096265 42.233842834629 41.9083581529276  
41.863927676552  
FAM108A3 84.8569316561572 123.674164545425 143.068901273486  
117.699959435983 196.17328008185 145.170590045628 92.5391033814713  
64.3284163241986 133.074560812703 69.6511571901941 76.0420039542595  
76.2533853403813  
FAM108B1 61.0831990510269 84.0305689846475 59.2455550633943  
47.2862299990937 63.1646322810687 51.7594352155304 66.603126065489  
66.5234828659154 84.3526980051279 59.1496467460507 58.0095518210499  
67.9410473129639  
FAM108C1 1033.99699402259 1125.31394383117 466.695081390256  
331.533249823589 568.371815312895 127.115038236278 805.87120346756  
1384.80615431656 1064.35745220225 727.181489302632 558.451033789799  
1232.7632290973  
FAM109A 114.148080724618 80.173718023183 71.0340758556049  
73.1447139654971 75.9136854087044 67.6817814091697 104.341160312305  
62.5528124447176 87.2282539094452 73.1407519625966 61.3529667465225  
55.3563533836982

FAM109B 75.1701698483856 86.9709077763908 65.6620676514157  
67.1961800572759 70.3677225924146 90.1080159649841 68.878562323012  
48.6441988290952 58.4891791448514 72.2443746456494 57.0154839296649  
62.6868461044048

FAM10A4 101.523741547876 122.0305509548 138.036631806718  
116.663501139305 90.7345603183196 166.511915820497 84.5354986509039  
123.597489107285 125.801834682035 153.059039745191 159.147713331732  
191.896416838806

FAM10A6 46.8141313516997 45.4143854024453 42.640829914102  
43.5627649099623 44.0451487108213 44.7804080899431 36.8369172900902  
42.157627240486 38.1169703906207 45.1569741609597 40.3452320167286  
44.0451487108213

FAM10A7 47.3791873993182 62.0404348860702 61.2679059816982  
44.4912617551615 53.6210959113222 81.909815795953 41.253645578517  
48.6441988290952 58.9870089759222 46.9598474201212 55.7868713984479  
68.5174271063894

FAM110A 176.653849515825 152.972693071526 171.33368481035  
81.0486107101125 199.634544522948 70.7782698163955 183.584085676174  
157.639656300073 138.170787392253 172.416351632442 197.923403667051  
172.869292380866

FAM110B 51.1055541075029 40.7952353240579 44.8872784170036  
56.6458456890715 50.7615314686244 62.6839349907803 38.5066108855005  
42.8482181313226 44.8003345643334 80.2774079897733 70.8670844767965  
53.1182952086284

FAM110C 47.6397712007919 54.6089451252049 56.2441895183416  
43.074472921841 47.9128504683618 39.8455060654531 38.4005795891396  
46.8954576545929 57.8772482723463 45.9004543328976 39.4410515050885  
51.0013344286851

FAM111A 141.649461526745 255.126812649967 266.905855859261  
195.968119243879 85.9392883641626 118.806070800059 195.672836308456  
325.769076169162 222.40005420611 233.326886009799 185.395460281034  
168.492959515167

FAM111B 44.1294459089314 41.4508241771315 44.3344900481112  
46.614092935749 41.7929491793697 35.7034203372528 44.3440839686558  
44.797320243931 48.2123120250343 43.1839109702714 41.3553369544097  
41.6550823405646

FAM113A 115.557690369703 99.571118823509 148.255880793905  
75.7666827480067 151.724932189601 60.4065050472082 82.7853677822046  
80.3860547572521 89.2056902297352 109.045804556923 113.169111095305  
104.936456561176

FAM113B 1149.02954135912 300.732955139561 446.902178094675  
303.139550962377 112.721024337362 123.61359914862 150.374739898477  
191.394143505573 270.156612086731 328.341232263338 249.995119246929  
392.622487173359

FAM114A1 66.7759319948677 79.4710406831985 64.6111899743678  
59.4674205670657 110.869341159607 109.832638804839 58.5087296620514  
50.5070012045444 70.5699797830702 65.0928075335306 64.5347406608537  
84.7947249929138

FAM114A2 52.5792653122861 44.8529259387308 57.7415362494584  
58.7338159410728 42.1650127805175 53.565717255469 46.5650556481721  
55.3122077514658 48.3119523820103 53.4109882045447 50.0303076717704  
60.5948704279864

FAM115A 1524.01520893763 612.441960343995 733.358170858378  
927.61341837276 888.56944380788 964.268294825556 1075.04105984319



1806.22468459769 598.686989781235 1824.79010714035 2002.0536042686  
1349.09482344633  
FAM116A 85.9970657980042 113.198141130994 97.6663462144457  
114.611557317665 98.403191200835 120.231435193839 131.496769528338  
123.022511916727 128.616776019243 182.448444305445 153.028210322286  
146.389547177092  
FAM116B 153.028210322286 127.043177339038 113.539485042978  
145.526972410673 141.180682718758 81.0880833950735 107.148000219752  
150.405742308999 100.874437079608 128.873145026756 119.691133736693  
108.479856042609  
FAM117A 35.9305494063137 44.0409178714232 45.063792968927  
44.265834798964 53.8260140375214 47.2009420656854 46.8613212048981  
40.2382908228517 46.581796165231 53.5498255316009 51.3103617600342  
43.7672102682067  
FAM118A 88.0186381834147 161.326580647514 66.737740728688  
47.8164193292842 108.251353392321 66.1082848714279 92.8579489575841  
735.60603239712 163.011116329807 65.6721629145797 83.0072253231162  
80.4404044229341  
FAM118B 59.8248482438562 47.9128504683618 55.6865353018811  
49.1786207920603 63.686652234709 58.4435847520801 51.0013344286851  
53.1052228246467 61.8824218975538 51.5855515705917 55.6151308605445  
62.8485724004124  
FAM119A 1130.2486883492 807.223772452842 686.154904023493  
1035.67547271468 461.83420090894 500.549865625701 941.514118803572  
1390.12380748446 527.439095170064 1712.55038816005 1425.37639004849  
1084.23003918768  
FAM119B 158.478919789334 90.6269311015532 146.87603018486  
106.8866235778 128.532373805894 105.317399386109 117.634238804678  
101.738441694376 102.926945888985 152.649165330093 121.449647909665  
122.914175013196  
FAM120A 781.223434214089 846.773659307087 635.050535522135  
688.920755848722 894.486674059951 587.88126282119 807.620534408416  
995.397944432196 714.075528895169 1078.86166154061 949.923102632043  
999.862452730252  
FAM120B 464.671881584567 482.238595345574 460.994460486229  
374.601792595646 338.000998124097 383.705244574204 287.39391763763  
244.736442646499 233.468474830926 548.217757366495 415.364456363434  
371.709014310561  
FAM120C 43.5710871617107 39.9697332660833 44.5134109184888  
40.7481155008596 40.4639532172338 39.9397419279057 40.0052661202207  
43.3262148375525 44.1519466943185 40.8049408996274 48.4717951775049  
46.1592873342534  
FAM122A 59.5711567415697 62.6984594468418 54.1637401903523  
58.8224410806741 56.5094373275922 72.5230902197916 63.2726414544553  
50.9099078696349 64.830448408529 49.4006068471301 58.5450868286167  
58.4598072919688  
FAM122B 133.626390404589 179.241252961119 144.079981029616  
97.6774247176874 292.065366215278 106.317388820963 135.323750661937  
187.147252401703 164.882513036349 108.525500270474 118.10944558223  
145.659132843873  
FAM122C 45.7356815244513 43.5182502375207 43.7630587657205  
43.5627649099623 41.8806343997257 42.2577689927563 38.6243997507646  
45.3872406432794 43.7630587657205 42.0621425894624 39.153226699662  
43.6753843488695

FAM123A 41.8409927585705 44.3529919625344 39.8617019260946  
45.8051846088552 41.1868052124344 43.5752393599169 50.9246396457383  
45.7476095696859 45.6582729799009 43.2988017098387 40.1422119692495  
42.8864415494484

FAM124A 37.7384958256497 37.7384958256497 43.401782064778  
43.1847628331565 40.8873907150245 35.314469458379 37.7136011474903  
37.5511560880902 35.3227485563945 38.6454098044474 36.7283081422707  
36.5474283500601

FAM124B 52.2236479204029 51.524711857679 62.7605715573218  
84.6435656850129 57.8039717833131 50.3245489035833 49.3854238365325  
47.2864663693787 43.1805016690297 52.7972156492746 56.233217375698  
53.3904307221902

FAM125A 372.982648892131 277.12373983597 525.687522832693  
264.924262411772 606.481020597082 263.799439226561 253.072560237983  
351.8239141662 499.356036793973 336.679355848349 475.621740714165  
319.954889553226

FAM125B 50.420938814754 124.156774983746 60.7530213660442  
57.5666238219027 57.9968895221633 82.034818940429 69.0530953932111  
65.1041577962151 70.2725751014865 120.533617429145 105.197692490363  
88.4036642243438

FAM126A 43.5710871617107 41.0678614026819 42.640829914102  
44.0991023527481 42.1386542162789 51.2318935933116 43.6753843488695  
40.6663433492193 41.2870505273664 43.6033221838149 37.8710943171479  
45.9693232070002

FAM126B 62.3042205863409 68.009873198833 76.889690218685  
106.8866235778 63.4427357028556 70.4482288143151 70.6592421895338  
63.5295088521896 77.0244607682203 60.1912192309911 72.0389007415456  
68.3604212141462

FAM127A 547.442608452594 437.280601907944 590.709061039001  
409.312313055794 675.832363405287 952.16345035163 527.97309138633  
497.290172759099 395.298033031033 915.936211119242 728.257836227637  
611.538630852232

FAM127B 186.891912776245 143.233722839451 159.440571032045  
94.1680559848644 231.085533860683 163.126491735808 255.884444464408  
175.41042153356 178.289913291111 204.318269745079 176.43047680293  
157.774096599452

FAM127C 56.3471340054074 57.0082102559228 73.1262465119304  
49.7350276169552 68.5888253504788 55.1987351219665 66.1940959364976  
57.037639245179 70.5699797830702 75.3333024462557 65.342842101283  
68.9885481504003

FAM128A 46.9939712192224 39.9697332660833 39.7411455670172  
39.5050383901884 39.4693871570028 37.9951997351435 41.706879587091  
38.745552403895 36.0741672064298 37.8217989841918 38.745552403895  
36.3454320848591

FAM128B 36.7356360093603 38.7344853699576 46.5650556481721  
37.9875302985336 43.5544347011646 36.1190722948669 40.3302268293707  
35.7973685350741 39.1790517315259 39.0648733099061 40.547835538778  
36.5474283500601

FAM129A 47.1962846565261 70.0470864733496 146.658116519622  
468.153823329361 57.2960245538881 861.427193617946 88.7029126110977  
73.5950442915143 47.798305839406 249.411435337932 357.668448180268  
532.981045084589

FAM129B 549.407911286514 487.749060801066 297.187417426993  
347.552309199761 302.20349084931 247.676607756929 413.918050849658

366.129480083279 483.416873464931 331.306005726359 333.122044191102  
362.506098778318  
FAM129C 41.5421429082231 39.7835513496873 41.6079958749402  
48.1662933382789 41.6806984441849 43.4681646416585 42.357910063876  
42.8482181313226 39.6609238036815 38.8507804383261 38.8507804383261  
42.6758568421347  
FAM12A 49.085741080241 46.0713306971594 42.8270038153139  
45.0798408927912 48.1473938886239 49.5424425850549 43.3262148375525  
44.5029690493211 51.3511088648386 49.0841460667818 53.3078448066074  
49.5539622682049  
FAM12B 42.8036731479932 40.4359177791566 40.4882741869718  
34.2080003860523 37.956732373465 41.554942319225 39.2533668167483  
43.3262148375525 43.3744503319109 44.2580151149956 39.6403089864678  
42.7782216342806  
FAM130A1 121.449647909665 123.768417863139 110.734219768388  
103.961956810572 112.391188787919 102.24202987437 109.255307556049  
141.376779431031 137.395516155158 89.4747568145717 84.9601800557888  
99.6243435693941  
FAM130A2 43.0930293831497 44.9370339275041 46.4569566520107  
52.1201052574162 31.3942305191093 47.8636003588181 42.9803717121865  
43.7396619462033 43.9450023643394 55.2214187655851 47.8284278211109  
39.0536056496869  
FAM131A 101.448989278761 107.585504340548 112.007118067348  
97.0813208326187 57.0504111569238 181.2179249806 65.0031119608637  
116.547937420457 41.7627910693483 96.5102825310977 92.9043863423147  
120.392561825049  
FAM131B 43.9309845324767 48.7084357480922 39.0775870687758  
43.5627649099623 44.7829632472754 46.7800033479223 44.9863726205428  
49.7309743973184 36.197424053556 45.2556760873335 47.299647867533  
42.4607795638552  
FAM131C 44.1737502492846 44.2630383225933 40.6737160001291  
44.265834798964 44.5668141895992 44.9370339275041 41.1886975241176  
51.8347877274018 55.1253465069845 43.6670755115848 40.4094901248527  
42.2577689927563  
FAM132A 53.1309801459151 125.676172266736 46.5650556481721  
50.8567345921473 66.1650385535549 47.6803619768589 43.0930293831497  
42.5435283762933 55.4030910454028 41.8613406887824 44.7114813656401  
45.0985088502363  
FAM133A 38.7537364570873 42.4493032770053 41.437237454134  
37.651298468202 41.0885562160946 39.8455060654531 36.9355798143571  
40.047314525032 39.2809305246091 43.9450023643394 35.6970528713709  
36.7762265039864  
FAM133B 108.156702405177 97.2004257862686 104.557637353314  
103.447730395424 101.789162379972 131.990661474974 113.322929203297  
166.488589768213 114.174791258883 134.908982962131 151.425712904293  
123.247207157645  
FAM134A 168.78407943637 108.39424630351 132.307107503819  
148.529482776555 141.410183156424 106.317388820963 115.691017747672  
198.705875080904 168.036319777283 355.00914527669 182.576662575358  
167.746168796779  
FAM134B 77.9820921829024 42.5269793679335 39.4304889666789  
65.524821699432 37.2949506366592 63.1780854659428 71.4564394972198  
59.7744650739434 67.1278109419819 59.4969799685856 49.319499137678  
48.8670821164567

FAM134C 50.0466349801009 51.0175677516029 39.0775870687758  
39.7411455670172 39.9697332660833 40.1428591998404 38.7337086062875  
38.079222289614 43.9450023643394 44.1379638573455 49.1067959632109  
49.3087627580849  
FAM135A 51.413025495745 79.508103983962 74.5528557785378  
47.2740099216972 61.6452971581503 66.9499465764301 58.7585623394335  
55.8087097725119 67.8688083153991 67.0489032883986 80.4239296853518  
75.3696105759836  
FAM136A 341.535750991033 250.621261212308 233.850715388018  
200.401133392259 318.609131605258 183.002191434723 316.745819100367  
381.533380474563 244.786768738229 203.353724675525 169.889618506937  
189.516455814322  
FAM139A 38.5007204246293 40.3104838541906 40.5386195997545  
38.1421709520616 38.3561682218911 38.1169703906207 42.1372626664516  
37.9273653326866 44.9645354363967 45.6868589181768 40.547835538778  
41.8200132437731  
FAM13A1 58.3453537594243 85.2364387652201 97.0666517150668  
52.9352788093583 64.3571664944642 103.67004664951 56.4199442234707  
56.6188723715434 117.626009607247 67.4256666294142 67.1477341610979  
72.9580216367379  
FAM13C1 36.4179024367746 43.9421822132391 36.5099686711015  
41.5464765641928 40.7215101318274 42.8181679217665 38.5512429290626  
39.5968185906126 38.5019918517688 41.9666541498638 40.6710390406154  
39.1011392200677  
FAM148A 43.7585538437696 34.9262464079777 40.8420925848403  
47.0874209746031 35.7973685350741 36.0306975524309 37.2892641289258  
33.6816578730693 32.7294532998931 37.920964499903 34.8383995317036  
31.6419446793642  
FAM149A 51.1740855632044 58.9128486419884 37.8386378737561  
52.6947911480086 53.4109882045447 300.803955139552 95.9298109273155  
89.140025661759 100.076931518374 156.456239358718 135.824520574227  
93.4180535865914  
FAM14A 92.1908585323292 55.0897019602305 91.8533850418261  
142.945182805248 62.588825192561 114.526825145076 56.3376046940285  
74.383456365584 67.1278109419819 92.6888475289584 79.0304119352941  
71.501028931626  
FAM14B 46.9939712192224 42.0709558258414 41.0356368374708  
43.4410741327254 38.3561682218911 39.4953494583071 36.9355798143571  
42.2577689927563 40.137818555383 41.7405682794166 37.9946685306274  
42.1537476443423  
FAM150A 46.441301934328 363.324816966828 57.7415362494584  
39.1706564265495 80.1294564809102 41.2567470068038 169.970634268117  
51.0724630072723 74.6277165793069 74.2379710965903 118.385089099623  
315.592187396219  
FAM151A 36.1232327599945 35.0668743708816 39.6833800000587  
40.0698728584484 41.7929491793697 39.6251842352088 41.8751578329365  
37.5511560880902 37.7384958256497 41.9666541498638 40.0766543123257  
36.2582325396375  
FAM151B 43.6706764143908 44.3529919625344 42.640829914102  
44.7980740332174 39.859345745831 41.3553369544097 34.1889222434768  
46.2779564481158 40.5912213523345 40.5090849993014 36.6298807161755  
45.2783024981315  
FAM152A 172.720244584464 199.404836798715 157.281394920992  
162.932479392087 195.205980592503 236.488376031891 166.910579215196

191.284436365696 239.569514501529 178.219279777774 171.938863440177  
211.625447303889  
FAM152B 221.195872577098 320.966569449558 268.808342880355  
289.332274319357 297.332750143067 163.360824752796 227.739219647972  
234.333935191237 330.391945158969 130.62791061956 152.66454549157  
190.161505611036  
FAM153A 42.7150227340364 41.690833180291 44.2405728317107  
45.8145523469421 46.7508829977587 45.2852528185486 42.8684958525042  
44.7044140979108 45.0017158586743 37.3179578037963 42.3413611855132  
40.8098117292321  
FAM153B 84.0388582916959 59.8102324370568 73.0128142320238  
93.1668080716761 60.5290966885203 63.1091746640396 85.5027511448958  
143.822560762049 61.9682048429354 123.301491241188 120.20612443357  
120.807573842238  
FAM153C 43.8582747295766 40.8476436931481 41.8389336728199  
42.0621425894624 41.9842695818285 40.9506062495231 42.357910063876  
40.188873541274 46.0633179231318 39.8455060654531 40.0766543123257  
41.9430737035925  
FAM154A 43.0930293831497 35.5310164682026 38.8775560911841  
42.8235313007746 39.2608760193011 38.9378717994178 47.2927436772465  
38.6454098044474 42.9020321355927 39.2623423164488 41.4508241771315  
42.2577689927563  
FAM154B 45.1912496459517 33.939263369489 41.785676764591  
38.4208429103799 42.3685136297603 42.5660695551615 35.9894133432376  
36.1375121409002 39.1790517315259 36.1550293353654 44.2925355984056  
38.9496515344837  
FAM155A 40.3478825593224 37.5469247328848 36.178547300352  
39.066284740632 39.1650142708257 37.1317006162938 39.3585350448719  
32.7676164492555 41.1742244762318 35.0668743708816 37.0180934800573  
39.1553169409075  
FAM155B 42.7150227340364 38.3322849790657 43.8495248991589  
41.1886975241176 42.7982502551634 47.0027453663546 42.357910063876  
45.7476095696859 49.2879849674517 43.2988017098387 45.4799270968969  
40.8681871019812  
FAM156A 150.031554835542 235.764999941441 283.484056482174  
137.831070407907 170.527024636624 115.441414762268 153.139323479953  
148.333778341005 149.330073823683 173.08677862231 164.262531918679  
167.430013807712  
FAM158A 127.961989181945 72.6888636455541 76.1493261430901  
107.637618676176 95.4533981420022 87.0685571351947 111.558107942386  
137.403148427792 149.856848496725 118.410983614453 113.791456064084  
85.8154958329408  
FAM159A 46.1673159982664 47.087835967892 51.6159542017038  
62.8201270538435 46.0977687311222 49.1013967533186 51.1541843174981  
48.4670130605028 42.992884918158 50.1649089793069 41.4508241771315  
37.0953622406687  
FAM160A2 139.436084808369 182.219366179899 200.144817111902  
135.553887060537 131.973056760893 152.17335005192 115.691017747672  
78.6911549149983 126.232262861308 124.683201596193 127.051878502711  
98.403191200835  
FAM161B 40.2543341073001 42.1607322031054 44.1452943804044  
42.8235313007746 38.1644569189523 45.3882138838137 43.8206425661746  
33.3307770183871 38.4344387289956 39.1621898366355 36.43924066428  
43.0930293831497

FAM162A 129.014076422249 181.966839676473 178.156332261759  
104.672760332135 199.442733280533 138.82907142482 136.883475451494  
129.925137664962 277.878824242495 205.672652429972 136.686164935569  
281.840536529928

FAM162B 75.0704619826557 96.577572948724 136.530734456168  
124.350816245276 121.552188287725 154.355197155161 44.8643898647322  
220.621142396402 64.4098139218465 148.654594696193 295.69493803986  
108.213380368446

FAM163B 44.9370339275041 40.7602938767524 36.5474283500601  
37.5764485234171 36.6850522695274 38.861780967827 37.6036146841933  
38.1835938174625 39.2497056720346 41.5804111566887 39.5399188536544  
45.4799270968969

FAM164A 92.1455386560941 124.064628168507 139.758805241617  
100.654701845984 79.6133633483649 164.917385239962 119.277678423944  
124.890309370032 100.671408579579 100.638737800637 140.35042464015  
128.635811501506

FAM164C 76.6868184563568 42.9358255168086 43.5420658412177  
41.2551966132486 56.7602749462766 44.7044140979108 56.0515443021293  
66.3558126170575 51.8083208406279 52.3304586399695 48.042366934301  
47.5025821041537

FAM166A 38.5007204246293 47.8400694856726 43.1931731665131  
34.6468794865286 45.1137938810047 44.4619248757502 39.6535880152834  
46.1673159982664 40.9901805728485 42.1622837416589 39.153226699662  
43.9541718254769

FAM167B 42.9104454767916 36.9994058279362 37.1643693306382  
39.9697332660833 42.3685136297603 41.7627910693483 33.2425023465738  
45.642304356051 31.2688290305385 37.7315666632629 38.745552403895  
36.9976231206067

FAM168A 41.7397731376692 40.5400384479766 49.5424425850549  
43.8002456102021 43.9450023643394 40.244271403831 46.8613212048981  
39.9576138799997 43.2761454096265 38.528621456378 38.079222289614  
40.8681871019812

FAM168B 68.9745034946434 64.0903425729408 64.5232087947596  
72.6824533717231 86.2836002982515 143.152895211088 67.8919712859031  
63.8008894786105 63.4531374125233 100.849815617918 92.8089247593564  
97.1634390603131

FAM169A 46.3390850717989 43.3458769998118 43.7085219318425  
40.1362682639916 40.0599807618105 38.5707420487455 43.3832826368789  
41.2884376047238 44.2142581488029 41.9666541498638 43.844855336215  
42.6278608611758

FAM169B 49.7827734675743 46.0023068797812 38.7745734037492  
38.3166554965434 38.1644569189523 39.132725377815 36.7356360093603  
34.1806289878747 39.3750969348308 38.745552403895 39.4410515050885  
36.6603338274678

FAM171A1 91.8088250889427 134.099684731177 160.733526836282  
315.163147652199 369.451882513347 269.681925095165 448.648042823935  
75.3462586192013 50.8485682149772 179.767874494671 272.879564902621  
119.700522283289

FAM171B 35.8208542506595 44.2105195734073 43.0016969050339  
42.9358255168086 40.0599807618105 37.2686490268265 42.2577689927563  
36.6452480995946 36.4476883897928 40.4136535208406 47.2134341420411  
39.0536056496869

FAM173A 218.552143403657 240.786294140861 260.426488908824  
149.629940171074 170.184914156265 149.856848496725 149.832238573027

117.369735504926 210.768576894328 173.891042920642 228.026217504784  
167.229755109155  
FAM173B 115.557690369703 88.8039637390786 100.937651342589  
66.5921967967793 85.0017995689256 82.3364971911816 99.3797043236938  
77.2834482217973 130.184962393833 82.1062834830477 78.963270461629  
97.2316181542823  
FAM174A 119.243515595981 201.616017553422 189.80672643731  
152.250444470971 137.818833473709 118.67727980117 98.2074490157865  
151.775928080246 136.686164935569 91.9919654450652 117.439175394651  
147.239329753205  
FAM174B 159.797219482154 469.30167430316 339.980317745427  
73.5834042105313 203.152852313746 99.5531381996521 273.764998628636  
188.943404504867 832.181997440212 1059.63540694644 927.921867516809  
934.48498309932  
FAM175B 158.042994416158 187.836567614419 185.378190201718  
213.830284761604 175.362103430164 195.403882457038 216.303036873073  
137.496822743899 144.898757916905 219.771890732457 175.345244033253  
171.176393131741  
FAM176B 116.9812483023 90.0420794458477 83.3826639718546  
133.1387411908 74.9113162056974 93.3718038663074 93.748984888348  
72.8378863017531 57.1016072897358 84.8999904158793 85.5175308034109  
76.7791768896805  
FAM177A1 1497.73669971925 1103.90449800536 1305.35453202355  
1242.75259587926 1090.86617066541 906.833938613875 1135.43644148537  
1756.86714809925 820.147156401172 1776.78784112613 1511.33844030783  
1398.21942794938  
FAM177B 41.4508241771315 39.5050383901884 41.6977706798234  
50.5310598656998 41.2740822675592 38.9378717994178 37.0564573649223  
34.8949555140527 34.6720534245631 42.2614524730856 41.8168470823451  
40.9683275553869  
FAM178B 74.4565795414712 44.3529919625344 37.0642268327439  
46.1673159982664 37.8679241954337 53.3185097662527 48.0283573444179  
44.4031868028216 46.9739160257217 54.1683282066029 49.3901004211918  
50.0571060701893  
FAM179B 60.6441065119394 62.1642339365777 56.6888826857797  
57.4595416719581 49.9493230064613 52.3187919317561 50.8388984085636  
73.362936710475 55.8510296341925 82.1062834830477 70.9319024596628  
77.3260618801358  
FAM181A 41.2424637338424 45.4882438975269 44.3344900481112  
39.9697332660833 48.3814421939888 39.2248354955045 41.4742337714895  
36.3405039629059 53.2046867327331 44.1379638573455 43.7585538437696  
44.5432192783161  
FAM184A 44.6231541342 40.148780650831 45.8844325913247  
47.8164193292842 49.32293280121 80.0243450227647 67.3976855661302  
57.1362071277099 43.9450023643394 64.0162246399972 54.0374522273907  
63.2699016184868  
FAM186B 41.4508241771315 39.0894172982439 41.6079958749402  
43.4410741327254 39.859345745831 35.2067831864574 48.1747307200218  
47.6952179922944 47.1744296124496 44.2580151149956 49.7363778831003  
38.745552403895  
FAM18B 95.1224420992193 167.824386984618 154.386505379733  
114.78317743597 111.742106978992 112.753674408958 106.418690759491  
74.9541456286637 127.634504077212 92.6290175610859 109.901105821696  
155.174579191838

FAM18B2 53.4249147153548 73.4899394858239 65.5442341130748  
60.620259884953 60.7495043977707 58.1576967525216 46.7704450730477  
48.5089868936195 48.8584917918986 46.6598879466655 51.0492389286271  
70.5322939116406

FAM19A1 36.3649677956953 37.5469247328848 40.4070046183108  
35.49696651597 39.1650142708257 52.0299937917925 36.9355798143571  
38.5457716679071 43.3744503319109 41.8613406887824 42.2618615571566  
35.4484652445078

FAM19A2 45.1648925137409 47.1856919329105 42.8723769353017  
47.0874209746031 42.4864576619427 49.5923712603197 46.7100796279384  
48.5129953113273 47.3791873993182 45.4882438975269 44.3440839686558  
43.6753843488695

FAM19A3 40.6559419616644 37.6813837424257 38.5470982022687  
41.1886975241176 40.9950639693255 39.167836466228 39.0735041982358  
37.9244295089948 38.7298222155532 40.8970401536578 36.9060997041453  
38.5279745308203

FAM19A4 43.7228551318284 43.0227387991135 41.1860481368243  
43.3554905202712 43.0860383229288 40.4779565600984 43.0930293831497  
41.5817737564592 47.4356803320662 41.483412492426 44.1478805895017  
44.9645354363967

FAM19A5 48.4849194706125 43.0227387991135 43.6670755115848  
40.8681871019812 40.2449343247539 42.8598805316863 37.7136011474903  
37.86982638952 44.0519245668737 44.0409178714232 43.844855336215  
40.9683275553869

FAM20A 55.4004611309636 46.8954576545929 43.0971787292711  
71.5249259772583 42.7107928951766 51.6053353177789 44.6032218589199  
42.8482181313226 39.4762546236449 37.8217989841918 41.9908237694988  
47.6040671292013

FAM20B 125.091427687365 202.395470754957 278.067057781084  
91.3144101155547 175.136856246782 288.284384035759 128.024853362102  
165.905008152959 175.820979889343 146.997252473598 209.497482517298  
331.885872312948

FAM20C 164.847648206552 68.5251167137806 50.2203578628217  
168.897476166126 71.3752456831662 141.924244643825 45.4164642922183  
85.7013212907541 46.2779564481158 67.1926218405833 79.7238173467616  
89.0203733091224

FAM21A 45.7356815244513 56.8373628733077 62.4683876804812  
69.1931891474114 54.1225249245036 62.7515429046888 59.9792284253187  
42.0494116081998 45.2897806651929 37.2089297656361 43.3085358214154  
36.3454320848591

FAM21B 46.4669243193596 47.30559806758 50.646715186951  
49.4794462948437 47.0417926275315 45.889677919201 44.0137388752186  
43.1931731665131 46.2027193115397 43.0322714179517 42.59352468383  
44.6067118282704

FAM21C 44.9896851005259 49.8666125578518 51.223859150798  
55.9423752286714 48.2129341876251 56.6837988821564 45.9389765191262  
46.528592862002 50.8485682149772 44.1976966800856 47.1041363185974  
49.5272831893699

FAM22A 40.0557788909923 43.4667754607514 41.437237454134  
45.1944222548351 44.4031868028216 41.9543948167375 49.1067959632109  
47.0940613507321 43.3744503319109 50.1185085888209 43.9450023643394  
44.4067063477243

FAM22B 39.266565827316 39.1982470626863 45.6989664108554  
42.357910063876 39.7568367479301 41.9543948167375 50.0088611244948



39.7509165247419 46.2027193115397 45.7911932481722 39.8184668132023  
44.7401523707775  
FAM22C 44.2350046179299 39.7835513496873 43.6670755115848  
41.7614975630362 42.9090346219023 45.2852528185486 43.1931731665131  
50.857522488428 43.9450023643394 39.5637454855233 44.4688999098904  
42.357910063876  
FAM22F 43.7585538437696 45.6533175604486 39.991353369336  
48.1662933382789 48.9627346956003 43.7630587657205 46.0228732507872  
46.695848687694 45.5779686360641 45.2556760873335 46.4753015651202  
43.0930293831497  
FAM22G 37.0320432433314 38.9338521051669 39.9101908547397  
39.5050383901884 39.4693871570028 40.650742261428 44.2166118829877  
41.1575777497576 37.7384958256497 41.8613406887824 40.3452320167286  
39.8497227447888  
FAM23B 37.1485601150873 42.5269793679335 45.6989664108554  
56.4578213622965 44.8897737954573 46.7800033479223 41.4742337714895  
44.797320243931 42.5406888281114 46.2286164776607 42.170702295259  
39.1553169409075  
FAM24A 42.1537476443423 35.3307157989724 36.6522278218553  
44.550322123994 35.1411239266238 41.9543948167375 41.1507980856436  
41.1575777497576 41.074824727477 42.0621425894624 41.1638563416981  
39.7411455670172  
FAM24B 54.2648201582657 74.4062547641529 70.18107651423  
53.4785152499923 57.4568403979509 49.8472708021525 78.4937314423253  
70.0697974278875 61.0094935318105 65.7321440516177 58.4816190076338  
63.0266170942566  
FAM26A 41.1523487516364 32.742439449766 40.0998167098057  
38.9534635879195 37.4470183315826 34.2773859804062 41.0381860307445  
42.4580504587581 39.6609238036815 37.0320432433314 33.4071187618571  
40.0557788909923  
FAM26C 69.1641374421455 62.3983214098965 50.7502704822135  
87.114638423256 61.3077641493507 67.5812474586277 84.607833108004  
65.5820437889838 72.5993974280876 58.2818491355907 56.6884575165011  
59.6757573886627  
FAM26D 40.8681871019812 40.148780650831 42.2577689927563  
39.7411455670172 38.6454098044474 39.7394181011603 37.7136011474903  
39.5466975353131 41.5635499110307 43.401782064778 38.079222289614  
36.5474283500601  
FAM26F 44.7044140979108 53.3683962805281 46.7508829977587  
68.8167148906225 44.9936360641969 52.3187919317561 58.5087296620514  
47.3791873993182 52.4539007817929 42.1622837416589 47.6125796208753  
47.6938628797168  
FAM27L 40.148780650831 50.8812920005251 39.7411455670172  
41.0726336841311 45.8051846088552 41.8613406887824 43.3262148375525  
35.4526946152955 45.0997987980157 38.8507804383261 42.357910063876  
41.3481355128089  
FAM29A 40.6062943725118 38.9338521051669 38.0958223740111  
47.7362556248858 40.1978874031072 36.6522278218553 41.8751578329365  
36.0306975524309 37.3043739460234 41.9666541498638 43.5710871617107  
38.745552403895  
FAM33A 67.4846787600629 57.8405769800773 59.8273072817267  
50.0526763693329 63.955655956484 59.8102324370568 83.5149142053137  
95.0350792557735 91.9291200887492 66.4510869175159 58.3586374083245  
62.0967404944031

FAM35A 49.540449125788 48.8870563092695 48.2883694323339  
58.0218262176065 44.8351976221735 49.5923712603197 48.4859552186772  
53.5643281930979 51.0492389286271 54.0917531668054 53.1505787220552  
48.3648494350286

FAM36A 55.1306642449627 62.0908175930716 54.4384603094793  
60.4646208319121 71.1607965028029 183.96029495885 69.3468840908665  
37.7612949798895 63.2753814090696 84.4349803529132 77.1900613562529  
96.1710806345503

FAM38A 722.862413305704 769.685677484067 828.403901345618  
400.327164003217 613.914396149629 470.004780385708 548.966115135286  
609.243908604949 428.515605971056 496.303918649238 546.287195443189  
428.515605971056

FAM38B 60.9710783023013 53.4735821194294 55.3812135024656  
48.856176220627 50.5110359971301 65.4643755537228 44.3440839686558  
67.3976855661302 52.6561576154021 68.0556717366572 65.2295773603116  
51.9447450229707

FAM39DP 373.172504097546 633.819901764391 417.201611973051  
195.221917652149 672.515393219419 250.41086379231 289.332274319357  
1588.70376317303 207.30460556799 435.094968715663 503.793770799548  
458.47341225284

FAM39E 1296.28036613191 2545.03032507597 1950.93175239958  
617.091932961591 2865.25344854768 963.224016480187 1313.92053019421  
4784.36905964712 862.031722874406 1813.65521720537 2101.59244895554  
1588.70376317303

FAM3A 454.185408362583 335.655540947167 372.642038290698 266.323732730581  
824.946988188872 428.206419080492 434.682456437647 435.209988251425  
431.168903637888 482.5816387921 441.247306467645 530.996217072759

FAM3B 45.7700386532539 178.323615832679 319.328571608303 39.3750969348308  
45.6409129284202 43.4681646416585 145.883224917856 104.704892803169  
135.92805172353 218.056839407813 297.475572902965 549.407911286514

FAM3C 121.682085315899 108.019575675653 124.112216491975 99.9057667432209  
158.071355628454 139.294987640071 71.1521292570086 74.9146278608114  
205.854666205308 61.9882398986333 79.2824265044758 126.911056987607

FAM3D 251.268123356533 311.361885152025 684.865133028228 50.8567345921473  
52.8190882379316 55.6242009731278 78.8250642061439 179.186381381821  
79.0276852011359 87.9206275762349 74.3766944386886 60.7495043977707

FAM40A 73.7133884699889 81.3696465421645 74.4508307047509  
49.9014504704021 65.6824363141962 66.295597720304 63.2726414544553  
62.6984594468418 86.1741504863717 58.9069025298754 70.33819944440425  
67.3183506012892

FAM40B 123.608921653229 62.801431502597 73.4611178120841  
129.190555260332 78.6807873825307 57.9559082408796 96.8490167966217  
196.760671234837 64.447308523693 140.199798713912 137.410781124396  
103.343354834837

FAM41C 42.9104454767916 44.5152708955623 43.4709415392696  
42.9358255168086 43.5544347011646 42.8598805316863 45.6042625176633  
41.7419877611072 42.8036731479932 45.0155543555707 39.9899430628542  
41.5536168238478

FAM43A 165.107387190373 115.840734064724 107.501868837432  
127.789065386943 173.838110431513 176.816741656659 70.7238101239421  
179.974187861013 70.8606919488782 209.068725760522 224.266559865201  
133.823107212467

FAM43B 48.1952521496489 42.8542642792862 48.6037684272115  
64.0903425729408 43.1252272136667 110.935994444429 36.3194282084339

43.7396619462033 42.8036731479932 46.7646877499666 48.2910530887214  
46.4499258373233  
FAM44A 42.9104454767916 36.0366673493555 40.4882741869718  
36.7892997857376 38.6454098044474 39.7394181011603 39.2533668167483  
40.931294690669 48.3119523820103 43.2988017098387 38.6662194645633  
42.8864415494484  
FAM44B 448.508714709248 162.782568037255 194.469250918013  
212.219384864571 465.887689708274 435.632247999054 314.992390390165  
500.241231327789 458.861461526841 418.213885929509 343.828445728322  
349.371668774717  
FAM45A 136.657213529097 231.085533860683 216.976116788572  
295.473526251997 157.658760470424 198.432987946699 262.215263489321  
149.173801572239 134.749803376372 152.585423208022 127.345094323724  
159.12163104195  
FAM45B 40.8681871019812 42.9358255168086 41.0356368374708  
48.665578118898 48.3814421939888 38.2293008890613 37.4772922422734  
43.6434576713809 50.3245489035833 38.8507804383261 40.1742127891824  
46.3411353377615  
FAM46A 528.512401493184 696.946621824188 371.393488010768  
371.167168940365 182.885934774318 1094.91235708087 295.25359816523  
779.333013700435 294.220232101389 905.76958446454 873.451893437179  
515.007705025879  
FAM46B 48.8941062980393 46.2286164776607 64.6111899743678  
46.3203995372658 45.2556760873335 357.347859577591 35.9894133432376  
116.103491885674 60.164635768614 222.453547273598 271.275703732022  
131.496769528338  
FAM46C 93.9756797434207 524.972936438175 285.826380698286  
1539.35554229258 56.359578588344 134.646159826262 93.9805435116156  
140.853812988562 134.968128884298 117.293778127059 91.6826894933058  
133.43526498879  
FAM46D 41.2424637338424 38.0226905622357 44.2405728317107  
42.8235313007746 43.9450023643394 40.1428591998404 43.6753843488695  
36.9355798143571 41.6616444147804 40.1179210534118 38.6662194645633  
42.9887069977696  
FAM47A 37.1485601150873 39.2907645923217 41.0356368374708  
40.1804147506786 37.956732373465 36.3845892764084 41.253645578517  
36.8400213077707 38.1169703906207 38.2069499294002 36.43924066428  
40.3691324547049  
FAM47B 40.6559419616644 40.6723334103791 40.6312687664188  
40.7481155008596 45.9104478407175 39.4953494583071 38.3346870469391  
39.8965727231863 42.38204124321 42.785429206422 41.9083581529276  
44.293922970134  
FAM47C 46.8141313516997 44.6918600441328 43.6670755115848  
46.0905079010237 37.10170285405 40.1428591998404 43.0269218496197  
42.4926864381766 39.0775870687758 39.6719190054379 43.0016969050339  
38.0958223740111  
FAM48A 67.6373573669424 65.6010220593397 63.8740412329753  
63.9570596163747 67.1702819938085 68.6889514573956 74.9059650336395  
52.6782411631338 75.2977438265751 64.3640973625938 59.9682734755814  
74.8893925448138  
FAM48B1 41.9407041937973 45.0115870036541 40.4882741869718  
42.4580504587581 42.6022652963326 43.2805590023412 44.0687697278114  
44.797320243931 40.8970401536578 49.5265949137207 41.7272875295469  
40.4639532172338

FAM49A 53.3059058105836 39.6995529770239 47.5673419710251  
90.5216273844682 42.0709558258414 47.0940613507321 47.4439407315335  
66.1288889125299 44.4395580493118 40.4136535208406 43.0971787292711  
47.6040671292013

FAM49B 58.8936382809165 74.6847594297153 54.2670850492947  
117.598001907902 54.9249759425252 53.565717255469 69.1414574152997  
52.1062000766427 65.6876778328592 55.4037482627222 52.5930185400362  
60.2550788540864

FAM50A 1069.3975598703 686.154904023493 676.672146226382  
1115.27580736237 2588.47871581066 927.61341837276 1626.71747158994  
1111.89793143647 735.460645553438 823.933615182634 827.365231733511  
776.670493028756

FAM50B 97.7140868175135 51.6869155634183 107.211374033204  
93.3216420803293 182.343696914747 141.594428857706 42.1607322031054  
45.9604707098953 43.6670755115848 118.600699776727 122.258194040815  
106.020559220488

FAM53A 43.0001432913058 42.6022652963326 37.6557714476853  
38.9534635879195 38.0598374201407 39.132725377815 32.6530576979948  
39.7509165247419 39.853866204927 39.4710743516517 41.8168470823451  
45.9693232070002

FAM53B 85.417321091835 118.143444770806 92.3034609409756  
130.585540374294 90.5359675350156 94.5644670313964 75.3394781641786  
93.787204465284 63.4889805083459 97.6023731094756 94.2275161759277  
68.0751111916102

FAM53C 309.293546994308 241.486113826383 186.655552987116  
363.324816966828 304.33749254654 301.941928552396 290.956194006554  
256.302432791187 262.024495926094 198.190904631121 188.336316985251  
178.060342847557

FAM54A 56.3471340054074 64.8367546135053 56.9958049366454  
53.7155925246916 65.2116399196759 43.8582747295766 68.0529308175297  
48.1591264215184 55.6617952786921 47.0797760763156 40.8225507267584  
47.8931773060789

FAM55A 46.7293238583888 39.0102066700839 39.8299340037009  
42.4580504587581 42.9090346219023 45.8325181856483 40.7910160811527  
43.5544347011646 42.357910063876 42.4594149893798 40.4504608195666  
43.6753843488695

FAM55B 54.6235981131919 37.8217989841918 41.3366779545815  
45.8844325913247 41.467005949568 43.8582747295766 41.3594868055879  
38.2782436497441 40.137818555383 40.6022003765153 40.6373400186325  
43.3744503319109

FAM55C 44.0328992213727 56.7826399116207 51.4308501933893  
98.3948200992292 49.452985143568 71.1607965028029 37.4772922422734  
47.9942520395434 44.5303781239209 50.6486940895674 61.0094935318105  
51.138877923954

FAM55D 76.5124583559262 40.1073950092563 38.9790184198145  
43.9282059368202 36.9702228618069 38.8336427948187 41.1507980856436  
39.2151045217645 41.4369824439795 38.4187686307607 41.9083581529276  
39.1914386799476

FAM57A 144.711001798454 338.966238813782 297.701126167694  
166.304210248623 312.045709918301 177.27613997459 582.782165453802  
311.901423694475 395.298033031033 315.748168057656 424.87896140215  
274.887090359131

FAM58A 205.627744150936 201.236491769447 196.623560874725  
228.499788774214 598.404003732481 304.298036741211 291.327030793085

283.747865829282 295.999383698826 146.997252473598 194.536619596804  
160.100408020768  
FAM58B 44.9896851005259 41.3610369241157 41.3366779545815  
38.6414316877471 43.1252272136667 38.3418933808844 42.4939802311136  
38.8495095797881 39.2809305246091 46.7646877499666 40.6373400186325  
46.917149434588  
FAM59A 51.5888395924843 129.190555260332 83.5149142053137  
45.5869891570251 58.9875400392427 55.6242009731278 85.0342118119783  
123.978615472736 61.4842573582507 97.1201502245778 94.9001252449925  
92.3388129097482  
FAM59B 56.0477607422828 49.83247261979 37.9482157381008  
42.2496337895968 56.5933259268408 49.2050538150106 63.928488869459  
50.5070012045444 56.6079099547057 48.6124127998952 47.299647867533  
49.7336769474446  
FAM5B 44.3355304829989 43.683792219729 34.6977013306396 44.265834798964  
41.3755760434934 33.895835691032 46.0228732507872 44.6107027295193  
48.3119523820103 42.2614524730856 43.3085358214154 46.3411353377615  
FAM5C 43.1267841876606 53.8499082625091 41.9666541498638 45.7397504535169  
37.3785704939904 41.2567470068038 38.4005795891396 35.3608605269276  
47.417512242919 41.3321861371202 42.6366765186182 40.9683275553869  
FAM62A 261.260859494893 416.559486912165 301.257549182222  
247.966757890598 225.690879436355 302.79352975792 305.279475274196  
544.355979695242 406.104588997462 599.670771796585 431.168903637888  
397.108901822735  
FAM62B 1914.9556343048 1106.57048989685 1561.83892117664  
1129.19103016599 919.542051089664 2448.64580552439 891.080174768895  
694.590958116425 855.157599239267 1829.30985071028 1652.85734308754  
1436.67510926345  
FAM62C 50.1533437545239 38.7344853699576 37.1643693306382  
37.4223289687135 45.8051846088552 48.8744644207821 46.1634822993009  
42.2577689927563 44.1519466943185 46.1390887492649 35.6970528713709  
40.4639532172338  
FAM63A 223.826005691932 153.515845356859 153.364107550338  
175.028390974125 124.338989399317 123.25443049561 207.513604688444  
567.393665550133 148.63149183467 324.658458599373 312.530335465784  
230.197573134703  
FAM63B 50.5670783769975 46.6314009405034 47.7737810047679  
46.8954576545929 43.844855336215 48.260931742163 55.695361644141  
69.1973371867031 49.641159251878 48.4890615340603 55.6151308605445  
52.8455400026194  
FAM64A 116.103491885674 84.1922656126304 78.450972383987  
52.5307002738469 186.301404367238 50.5148383400703 240.6614822416  
168.522052983892 115.132600341395 41.1222709786153 42.0750889188255  
39.2469742642337  
FAM65A 309.802432824498 427.199940706169 479.079946537291  
358.979854534484 219.555240189863 417.201611973051 302.79352975792  
338.355170063433 229.226876896347 286.497342437243 331.677243885539  
273.320144423733  
FAM65B 100.663054866186 104.072423445726 135.90862211552  
1335.4111951034 74.3523005665671 183.393353108744 169.970634268117  
69.4677195088043 45.0017158586743 78.6859709780134 72.4834467838798  
55.9555622193202  
FAM66E 46.0920218698606 41.8073910693411 43.6670755115848  
42.8235313007746 37.8679241954337 42.157627240486 42.0605906240248

46.2779564481158 41.9635525160083 35.2880714952489 42.357910063876  
42.6758568421347  
FAM69A 57.1046180136491 58.5406981871153 78.5325880060762  
55.8709511400674 57.2960245538881 61.4944752562671 51.7714254834195  
47.5950227477807 48.5792058061372 63.9129423266349 57.4622430729629  
60.0940570991178  
FAM69B 73.0358442003587 54.5839369292543 41.8751578329365  
55.8709511400674 60.9009676344258 70.380703483689 37.4345152884462  
70.9377012403023 38.2215591930186 47.7779356299965 48.0283573444179  
43.6285248402465  
FAM70A 40.5654775358427 37.6786104343959 43.5420658412177  
42.0102671859606 39.6123051184545 39.066284740632 39.8299340037009  
40.5640952422779 40.4997186069494 42.8414096678708 44.2142581488029  
39.8873706855774  
FAM70B 69.3418521417182 49.7741754763712 55.3345906164297  
75.4466520363487 49.5666074434383 50.8083040235059 44.5480632661672  
46.5717043290731 46.824299585607 43.2988017098387 46.7902798502321  
48.5632819314123  
FAM71A 46.1673159982664 54.6793272901524 45.6989664108554  
34.8137085420423 39.859345745831 39.9397419279057 36.08956004634  
45.4757965005055 36.3649677956953 37.5343260962758 39.9070785037411  
43.2776458914333  
FAM71C 43.2724556187214 45.0905928998779 39.991353369336  
41.0726336841311 43.5544347011646 38.9378717994178 39.4600924554505  
44.4031868028216 45.2897806651929 41.6373771565199 48.1352470945488  
41.5536168238478  
FAM71D 41.5421429082231 39.9697332660833 41.9666541498638  
44.550322123994 41.8806343997257 41.3553369544097 40.1235656101329  
39.3709357615493 43.2761454096265 40.5090849993014 37.92304440150891  
36.3454320848591  
FAM71E1 38.6454098044474 80.257554904218 73.2144205844199  
43.8002456102021 220.054040993848 79.4053001255904 85.1227830573138  
102.980622026276 72.6675345946258 85.9910479975356 82.8205269728224  
85.6038071277319  
FAM71F1 36.8072833828297 43.0227387991135 33.0260566875355  
36.264823544143 33.4316681623175 33.6859433472087 37.1643693306382  
35.9023742468744 41.1742244762318 36.4651112441576 34.4716904283753  
36.2582325396375  
FAM71F2 35.4287975493553 39.8695929627783 41.6079958749402  
45.334106390212 36.6354013629791 41.554942319225 40.5585676679482  
41.0381860307445 41.5635499110307 41.8613406887824 39.4410515050885  
39.7411455670172  
FAM73A 253.841638589385 179.974187861013 171.689014874037  
249.37112382902 114.5696064637 105.267519627444 162.902264837659  
531.36214636517 130.515102593803 317.004252313348 319.092568066532  
245.691073028699  
FAM73B 91.5417574979683 133.911556922212 101.804757613639  
64.3746985855249 110.411217828763 82.4084917533632 111.367789538268  
100.616027485975 79.1576305054224 144.290966198687 122.469733727349  
98.3142231283069  
FAM75A1 42.8036731479932 40.3384318592985 41.785676764591  
50.378948785456 42.269054475455 46.574682061365 39.7576136507593  
44.4031868028216 43.7630587657205 40.5090849993014 40.8225507267584  
32.3796054199032

FAM75A2 37.6397652536077 33.6902293666089 42.640829914102  
39.9697332660833 35.6434124419782 42.0574848021044 37.9430145836712  
41.8417024632349 40.4220196471124 39.5637454855233 34.4716904283753  
37.3600014814388

FAM75A3 45.8108990837624 38.1312950900467 43.8495248991589  
44.0451487108213 44.0451487108213 46.4648868771662 39.5496902678788  
40.7311497914871 41.7627910693483 42.9866214102525 44.0409178714232  
44.5432192783161

FAM75A7 42.7150227340364 42.6022652963326 36.1042012504758  
42.1273928203021 40.148780650831 39.6251842352088 37.830876898596  
40.831207953647 42.1594905198929 45.1569741609597 43.0971787292711  
41.4508241771315

FAM76A 45.2875173643252 49.6841415268611 50.2869791217819  
42.0102671859606 49.9493230064613 45.3882138838137 46.8613212048981  
52.3068458655445 43.5669306063196 49.3000844711116 44.2142581488029  
46.1592873342534

FAM76B 77.6056319020116 69.8983723094667 66.8632294055679  
55.2214187655851 68.307513091369 69.9819944829311 79.1432909353319  
48.4670130605028 74.6955454743937 81.537796828766 72.308304085263  
70.6903168772326

FAM78A 42.9104454767916 42.9358255168086 35.2101597814352  
54.8412943008635 44.0451487108213 41.9543948167375 43.0930293831497  
45.7476095696859 39.1790517315259 42.8936990772838 37.4642807402741  
39.7411455670172

FAM78B 46.9939712192224 81.3696465421645 47.7737810047679  
46.614092935749 148.99515914482 52.6226745117396 123.868848519181  
47.2009420656854 45.8325181856483 66.6332042895961 63.3544794716167  
44.7401523707775

FAM7A1 34.2180669723984 43.8495248991589 38.0452862258803  
40.8681871019812 42.4864576619427 37.7000400506818 41.253645578517  
39.7509165247419 35.1155486926999 44.8997235283254 47.4630625313159  
41.3481355128089

FAM7A2 40.6130792100165 41.1131693269222 40.1474543172332  
42.1679276329916 41.6383327669122 41.0057887014368 41.7656868106485  
42.2577689927563 40.3704050658025 42.3433931248155 40.547835538778  
43.2312848495114

FAM7A3 40.1925952773317 38.9338521051669 39.6894175734463  
39.1350512687938 38.745552403895 41.4186558780356 41.645120086609  
40.1812622331588 43.331653186429 39.3016855924751 40.0394833064005  
41.3012916486748

FAM80A 73.0970339739187 43.683792219729 49.2041300973417  
44.9370339275041 43.2484996523549 50.9724155054821 56.7780520416533  
72.2610650652674 78.1448136847078 48.9826868640753 44.553780984244  
53.3904307221902

FAM80B 48.7646976789783 38.0226905622357 48.0191002461099  
45.4634652319753 40.7779767565889 45.2852528185486 56.3376046940285  
53.2046867327331 43.1805016690297 60.8730416435467 57.0690683036183  
62.0967404944031

FAM81A 48.3814421939888 43.1805016690297 38.2280071951674  
45.4634652319753 37.4470183315826 41.4508241771315 39.4600924554505  
67.0904616289706 43.6670755115848 38.1042454705119 43.0016969050339  
40.6614700944853

FAM81B 41.8409927585705 45.4882438975269 40.8420925848403  
40.7481155008596 41.1868052124344 45.2852528185486 38.2933870238743

44.5029690493211 46.1101825640108 43.1839109702714 37.9230440150891  
42.2577689927563  
FAM82A1 42.8036731479932 38.3322849790657 36.9795961564828  
45.0798408927912 40.3452320167286 38.1169703906207 42.7431359850339  
39.853866204927 37.0126425326534 46.1390887492649 34.8383995317036  
45.3763275588341  
FAM82A2 142.585892496231 182.551901102169 116.709906902201  
118.762101740563 128.04037427867 162.721587349434 134.335592890814  
158.613823276652 174.752830194939 134.285947677624 138.859992681388  
190.977045076469  
FAM82B 39.5676051939342 74.1148641558178 61.841867306916  
54.8412943008635 69.0975200641705 46.6872654833579 44.0687697278114  
42.6450179841129 40.6957787921451 45.4614234442527 57.8991270166934  
47.3992733452821  
FAM83A 139.356696282462 51.3084273211359 315.163147652199  
42.2496337895968 45.8628493605663 43.1826328292558 42.2577689927563  
44.571915452417 228.571334092678 44.0784174571411 41.7614975630362  
41.8264657291934  
FAM83B 51.9545473262296 85.6763929745253 80.1665291227124  
44.265834798964 78.6286416672119 46.1513019317765 72.6959688212342  
60.2691630545162 99.5901498757707 96.9051967257119 67.8570354010492  
88.6771566133367  
FAM83C 40.148780650831 150.583488352207 91.3890908971311  
43.4410741327254 138.170787392253 49.1013967533186 63.0119737420787  
54.3820590274321 125.383837024985 70.7003843117511 62.5036823572932  
51.9447450229707  
FAM83D 235.888544042065 185.874151272261 94.717335243904  
40.4359177791566 265.101739636461 110.272925554245 275.928723831899  
102.980622026276 199.937572174194 120.60052672409 122.316617618658  
146.509308841361  
FAM83E 115.894467332637 43.683792219729 37.5597671487621  
37.9875302985336 38.3561682218911 41.159706131351 38.941855825269  
51.0724630072723 43.2761454096265 39.1621898366355 49.6706535876636  
42.357910063876  
FAM83F 53.3059058105836 47.3536182445315 41.2365089689635  
43.1847628331565 52.0583273941813 55.9351706773613 43.0930293831497  
47.5950227477807 53.3932110698117 48.6124127998952 47.6884372645373  
44.5432192783161  
FAM83G 34.6977013306396 40.7952353240579 42.9104454767916  
38.6414316877471 36.9060997041453 41.2567470068038 38.6243997507646  
40.5158867964016 36.6312676076142 37.6383530120621 39.3667161654772  
37.9607839934735  
FAM83H 559.559234461244 766.027617496754 464.209794165593  
78.0020909283414 407.161973433666 92.3477214133335 325.224254365274  
338.000998124097 612.014486689487 486.044304392285 448.508714709248  
232.440458525975  
FAM84A 63.1291723738553 50.8114699212931 50.6004078448405  
58.7338159410728 40.9950639693255 34.0045980663271 50.2016912396771  
70.7805103907761 62.1796792097014 48.2596564318071 49.2206713037152  
54.6659845741133  
FAM84B 335.612706052778 784.268074988084 212.395308461139  
102.706563820232 532.196768917735 119.866221751572 209.986313475002  
252.870708814507 508.081726674689 201.959257379662 196.760671234837  
247.905335219826



FAM86A 61.0468099710416 70.4233710555202 65.0656365694468  
55.5276281380084 95.9485602132766 62.5542376788358 62.5506324864207  
42.7431359850339 67.4775348162369 47.611018474151 47.8676131893619  
61.1751736985663

FAM86B1 51.1055541075029 68.8195659637992 62.3245608177257  
53.7332797903102 80.6966079421763 61.0311116373365 62.7542357937492  
53.4109882045447 62.1796792097014 58.3498430530295 58.2315917325629  
59.1391087632509

FAM86C 54.8439819445945 75.3462586192013 65.2670315837785  
57.8277957325085 78.7320333941149 70.8674195845729 77.5813459454823  
63.287067794195 71.787754116845 82.3488166506716 90.0223113095186  
67.6138276415458

FAM87B 44.2350046179299 47.087835967892 45.5883690965192  
51.949834638817 50.6470461863549 41.0582900711341 44.8643898647322  
46.9986083378817 47.9035532886869 50.8826620053386 48.2050207071554  
45.9693232070002

FAM89A 90.1430468048409 138.12608134713 63.4427357028556  
97.2220312216969 173.288267403695 95.6783002876222 128.70380102034  
95.3631043301461 74.466989900636 73.0186209472046 93.0092452285816  
113.336158464071

FAM89B 443.269396125834 260.824949424185 226.262409390222  
345.811673759417 319.596352961751 347.829279462722 566.318259999405  
428.958127252533 303.93332785291 385.36587480414 290.761706869722  
178.249889756228

FAM8A1 57.7877627794725 48.4497719907777 52.1242102345408  
67.1961800572759 74.0735632658567 74.6375749739389 74.0039764902057  
68.3372228877569 58.174555206394 69.4131195465674 61.1801493883012  
59.2035499250243

FAM90A1 44.7044140979108 48.4980626712175 45.989212296035  
47.3574589211166 55.8173045043348 42.8598805316863 63.928488869459  
41.4508241771315 51.0062122023297 51.3351387089044 47.299647867533  
43.0930293831497

FAM90A10 40.5654775358427 44.7829632472754 34.6977013306396  
40.7481155008596 35.4484652445078 40.7616966228404 39.1539892144371  
41.2551966132486 39.7537274655115 41.4397539024976 36.8282383070068  
36.2582325396375

FAM90A11P 42.9104454767916 41.4508241771315 39.991353369336  
47.0874209746031 39.5595233162192 41.3553369544097 44.7255207589606  
40.831207953647 40.4220196471124 36.2435874904689 41.4508241771315  
41.1554481567603

FAM90A12 37.3463875295726 42.1607322031054 40.0998167098057  
48.309866878365 42.9090346219023 43.7630587657205 40.1235656101329  
36.8400213077707 38.7298222155532 39.8873706855774 40.8225507267584  
41.2437378488025

FAM90A20 33.7777950030073 36.4002279956519 41.0356368374708  
37.29566077996 40.2449343247539 31.8228237796461 35.4623691645629  
38.1835938174625 39.6609238036815 36.8059561571675 35.7953070087288  
34.806104801006

FAM90A2P 43.3057780183445 45.1296099011771 42.9703533426259  
44.4997132318204 46.2532601271565 42.9079055704748 49.2032063970136  
42.2900457798748 45.3490330087217 43.2496075797541 42.9690414573209  
45.4339481422072

FAM90A6P 41.2700204291848 40.5852276210998 43.3465699185405  
44.6131679221578 42.3685136297603 42.4155142987678 40.5018032884134

42.0494116081998 43.6039443285137 42.1622837416589 42.6920011548175  
40.6127321267617  
FAM90A8 40.6559419616644 39.6995529770239 37.7384958256497  
37.9875302985336 38.5512429290626 45.1873487463472 40.9157352260901  
37.6557714476853 38.9834959368496 46.441301934328 43.0971787292711  
42.8864415494484  
FAM91A1 82.5344501505114 85.5135159896819 67.1299518044849  
80.4007868743886 75.9136854087044 62.0660509811111 63.3924515518667  
67.6767845246581 78.4428909886495 51.5855515705917 46.7386599624801  
57.5372732453319  
FAM91A2 47.4767851750188 42.0546888913836 44.7829632472754  
44.6905691366696 42.2510526338368 47.2927436772465 44.1350486752012  
44.5544727111028 44.20782151793 44.571915452417 48.2492481167112  
41.1138630151981  
FAM92A1 63.7818442618767 61.3428092991286 61.2153068100932  
53.593974682612 98.6553805168141 110.13638939902 52.8496345990125  
57.1362071277099 57.8772482723463 44.0409178714232 52.104880481326  
59.0894921452893  
FAM92B 29.4159269895179 38.0226905622357 32.771863438151  
33.9645433044281 34.0045980663271 35.9305494063137 35.6056062164318  
36.1375121409002 31.859589438824 31.8890957468737 35.6041926503637  
35.3525469364579  
FAM96A 379.098697147575 548.815225941887 280.920208331594  
615.838713743621 471.046851874447 215.175765091556 406.668753694984  
256.941243394182 594.184150517102 179.378838766172 199.776860110557  
320.13475752314  
FAM96B 275.882262550383 365.401746744015 390.647843814517  
446.37035118289 189.425423538906 335.167786298149 477.410937135204  
549.117045813593 288.284384035759 277.665554240228 306.115856873599  
336.490083577377  
FAM98A 192.536546957155 134.099684731177 124.94083215058  
155.564141715819 165.974848305379 131.57403028894 152.36389833079  
327.238337722366 115.63300104804 192.861174667738 174.148714092395  
164.205608279417  
FAM98B 40.4261913313642 42.8071549997047 41.3366779545815  
40.2427205947092 44.931941140132 43.006072841282 40.6301588195752  
37.8245699136327 40.7847110517594 45.8424887733913 42.357910063876  
46.4499258373233  
FAM98C 306.66244801017 82.4362183543935 101.494432845825  
83.014860007187 89.2285288333749 99.5531381996521 123.247207157645  
121.050369804136 122.23209417744 112.644426507762 104.986694941968  
102.899135663993  
FAM99A 37.7384958256497 38.7344853699576 33.9435456570176  
37.4223289687135 40.7779767565889 34.3887641786747 36.9355798143571  
35.2642250366721 35.6139301508335 34.9138625012006 35.6041926503637  
32.3796054199032  
FAM9A 37.9387791625384 36.89524015739 42.3536549114165 37.9875302985336  
41.7929491793697 43.0860383229288 43.0930293831497 37.86982638952  
32.4931776430014 36.6893251782922 36.131485826118 39.1553169409075  
FAM9B 38.5648843914189 40.0266778690352 41.9666541498638 39.6292788039793  
35.5895375758021 42.0016830644258 40.2154497375715 43.490078970589  
41.2424637338424 45.1569741609597 37.9946685306274 43.5420658412177

|        |                  |                  |                  |                  |
|--------|------------------|------------------|------------------|------------------|
| FAM9C  | 47.0940613507321 | 42.0500582486532 | 43.8153459269057 | 42.7489468897708 |
|        | 39.9088079891223 | 36.1605270099982 | 44.2166118829877 | 40.3691324547049 |
|        | 36.87840425987   | 39.6251842352088 | 41.3234441859498 | 39.5418280570561 |
| FANCA  | 43.7783560914188 | 43.0227387991135 | 47.5673419710251 | 39.3513480332078 |
|        | 41.7395080432869 | 39.8455060654531 | 41.4742337714895 | 46.4385386401326 |
|        | 42.9454180086838 | 39.3957535885631 | 41.3553369544097 | 43.1131704517186 |
| FANCB  | 49.7827734675743 | 51.3800036046133 | 46.0727230219512 | 46.4555908533915 |
|        | 48.1986674201502 | 42.5193208629123 | 54.339958888486  | 58.5406981871153 |
|        | 55.898892031444  | 45.3530683538086 | 41.0050831223107 | 46.2625470410195 |
| FANCC  | 45.3872406432794 | 46.8954576545929 | 46.1653991089885 | 46.3203995372658 |
|        | 46.6397391251762 | 37.4782441311626 | 41.4742337714895 | 46.4672637826582 |
|        | 47.4699236780425 | 41.5435611403119 | 42.5426057453993 | 46.0633179231318 |
| FANCD2 | 69.3418521417182 | 77.5737637002275 | 55.4848084120513 |                  |
|        | 48.856176220627  | 90.8109585999257 | 44.7058233759912 | 88.5511408870489 |
|        | 94.1762630490912 | 74.9179396623258 | 52.390086161937  | 46.6442692119997 |
|        | 54.4753345912615 |                  |                  |                  |
| FANCE  | 79.5531316151328 | 63.7721358300879 | 74.9113162056974 | 64.898351831341  |
|        | 96.5030525416431 | 61.1022920882065 | 80.6634117492762 | 89.7806631815779 |
|        | 75.0310858627394 | 88.8568707880669 | 86.3374157614394 | 83.5069968129733 |
| FANCF  | 43.0001432913058 | 48.8584917918986 | 43.401782064778  | 48.4916117779992 |
|        | 43.4544762830742 | 43.2805590023412 | 48.4859552186772 | 37.2237132058632 |
|        | 54.1745577382276 | 42.4594149893798 | 41.5421429082231 | 47.3992733452821 |
| FANCG  | 152.585423208022 | 160.134344197725 | 106.175784900392 | 99.0647786948132 |
|        | 156.822939275312 | 96.2490896573253 | 237.237762964658 | 190.442443946259 |
|        | 135.490875023792 | 123.704998437432 | 95.0604882262201 | 130.865421554474 |
| FANCI  | 65.4561038762234 | 64.9959712888709 | 51.9885249508283 | 48.309866878365  |
|        | 71.9737561190706 | 37.8102105794655 | 121.441763452598 | 88.715256326632  |
|        | 75.0310858627394 | 44.7958122466628 | 41.6336636285875 | 51.4308501933893 |
| FANCL  | 65.8703820581684 | 79.7238173467616 | 93.7782490229256 | 60.3481762331447 |
|        | 66.6118713143653 | 63.3612993417558 | 89.2120958473987 | 73.8027902447225 |
|        | 83.6862086874286 | 56.284748518655  | 58.4816190076338 | 86.3289616331597 |
| FANCM  | 41.4508241771315 | 41.3610369241157 | 38.5045333213784 | 30.6485078361448 |
|        | 34.6227169056411 | 39.2248354955045 | 41.0381860307445 | 37.86982638952   |
|        | 39.9444191873552 | 40.5090849993014 | 34.174642681781  | 42.8864415494484 |
| FANK1  | 43.844855336215  | 41.554942319225  | 43.1931731665131 | 50.7046706880325 |
|        | 39.3667161654772 | 42.5660695551615 | 45.1017494688414 | 46.0633179231318 |
|        | 42.7150227340364 | 41.9666541498638 | 45.6348103033479 | 46.917149434588  |
| FAP    | 587.385368995676 | 68.921126710047  | 65.2670315837785 | 355.568857981155 |
|        | 78.0077300979911 | 98.9560329133205 | 47.4439407315335 | 76.3509533017572 |
|        | 43.6670755115848 | 51.4454142248566 | 49.3901004211918 | 58.2251348002272 |
| FAR1   | 89.3989848564067 | 167.678403380953 | 207.342732103088 | 140.276520383146 |
|        | 167.49597550111  | 165.220069268347 | 150.242221910229 | 88.0827215704624 |
|        | 190.442443946259 | 315.186937216422 | 248.482699989877 | 214.691909801388 |
| FAR2   | 140.226992517573 | 195.968119243879 | 68.6095266659765 | 151.99110418225  |
|        | 101.46584765758  | 75.4227827818591 | 307.133157118667 | 172.506486240017 |
|        | 173.891042920642 | 46.1390887492649 | 51.4413099192899 | 46.8129509799753 |
| FARP1  | 173.925818790068 | 126.564008534823 | 95.7125018118399 | 81.3364476638024 |
|        | 140.465247047676 | 87.8505898087072 | 181.2179249806   | 112.281286038716 |
|        | 100.43365828852  | 243.403622361932 | 172.777241940677 | 222.336600180634 |
| FARP2  | 57.0006212637829 | 56.3560498705517 | 64.3312319756553 | 81.8727530460686 |
|        | 58.037539503209  | 54.9108046955355 | 66.1940959364976 | 92.4953883194488 |
|        | 65.7924490713262 | 101.759714275976 | 84.1922656126304 | 71.1595608255838 |

|         |                  |                  |                  |                  |
|---------|------------------|------------------|------------------|------------------|
| FARS2   | 330.168672676816 | 156.259762538052 | 169.99300253813  | 164.612971085488 |
|         | 393.337170271481 | 225.918246061369 | 155.018308238778 | 204.039190380778 |
|         | 300.186402341399 | 187.580695643466 | 198.623556176842 | 162.30238363798  |
| FARSA   | 106.521012342668 | 107.413918714848 | 118.619819027443 | 101.708164294697 |
|         | 234.873589896708 | 91.8295472317386 | 111.202737864873 | 137.218635091665 |
|         | 139.590367312743 | 111.511934617893 | 131.757828130578 | 94.6167194649276 |
| FARSB   | 45.7356815244513 | 55.6972661824064 | 45.2313723727673 | 44.7980740332174 |
|         | 64.193536444915  | 53.1052228246467 | 50.0088611244948 | 48.4670130605028 |
|         | 50.8485682149772 | 43.2988017098387 | 54.4140381300469 | 47.8931773060789 |
| FARSLB  | 16661.6081002448 | 10351.5373412096 | 12125.3293116195 |                  |
|         | 10996.2779403491 | 8050.256095383   | 5932.92478996609 | 12770.8282719641 |
|         | 16661.6081002448 | 8259.38594893529 | 13230.9863405074 | 15358.8899487375 |
|         | 10072.2414399735 |                  |                  |                  |
| FAS     | 39.3100256336821 | 46.3370338074996 | 43.3465699185405 | 44.7401523707775 |
|         | 40.9950639693255 | 46.263826584899  | 39.8695929627783 | 45.2806199505029 |
|         | 45.4154248354367 | 42.7275315121163 | 40.9683275553869 | 41.8200132437731 |
| FASLG   | 42.6036491382658 | 39.2907645923217 | 49.8344973836834 | 45.5869891570251 |
|         | 43.7517118200398 | 41.6590564937735 | 48.0283573444179 | 37.2237132058632 |
|         | 42.0621425894624 | 46.8954576545929 | 43.3085358214154 | 38.6454098044474 |
| FASN    | 771.554891868456 | 1738.00955642263 | 1925.20977162704 | 284.942182200489 |
|         | 2944.3433949897  | 625.435083064752 | 2032.18819581205 | 416.149496747947 |
|         | 3001.25236839028 | 275.611524861938 | 390.331295238889 | 292.389429869034 |
| FASTK   | 148.529482776555 | 156.95090716929  | 185.658246392943 | 104.462230406058 |
|         | 178.012676342712 | 116.20672562701  | 111.256949641793 | 120.357621336736 |
|         | 220.337850438943 | 137.916048669047 | 140.128033028434 | 122.23209417744  |
| FASTKD1 | 65.0721641331632 | 64.643220133046  | 67.1299518044849 |                  |
|         | 74.2429851177794 | 100.645556491457 | 50.2163892855092 | 62.1970616836737 |
|         | 85.2849531543957 | 72.5993974280876 | 83.1874704625702 | 73.155721596638  |
|         | 74.6734358603424 |                  |                  |                  |
| FASTKD2 | 82.291097567232  | 84.6811991332281 | 61.356483470053  |                  |
|         | 55.2214187655851 | 105.187381311145 | 87.0685571351947 | 85.2088054619229 |
|         | 70.6568303458436 | 73.5541045639348 | 58.2818491355907 | 72.842552380479  |
|         | 76.4580830432622 |                  |                  |                  |
| FASTKD3 | 79.105698465489  | 80.7409247380392 | 71.6573554353691 |                  |
|         | 62.9364422691302 | 92.4619796591359 | 63.1604223919703 | 98.1371527802953 |
|         | 58.364744007152  | 90.1430468048409 | 50.9506778292488 | 52.6960621424156 |
|         | 65.2125527940945 |                  |                  |                  |
| FASTKD5 | 222.202580186782 | 215.08694410402  | 180.663636520073 |                  |
|         | 191.182530250155 | 293.649670545233 | 143.265312025262 | 295.430709655678 |
|         | 134.537040608687 | 191.298525555624 | 159.046483157634 | 160.733526836282 |
|         | 133.43526498879  |                  |                  |                  |
| FAT     | 346.438778257772 | 392.237227927376 | 460.994460486229 | 118.10944558223  |
|         | 164.312946712409 | 128.414712393554 | 230.444295657577 | 275.096637886925 |
|         | 472.752186426584 | 382.538365722661 | 354.015808474189 | 357.254500791202 |
| FAT2    | 42.1537476443423 | 51.7495306734657 | 96.3741876853801 | 43.074472921841  |
|         | 39.1650142708257 | 42.357910063876  | 46.5650556481721 | 42.357910063876  |
|         | 140.961217055867 | 102.607924735378 | 73.9701365395921 | 86.2118355769367 |
| FAT3    | 42.8036731479932 | 43.2649781354792 | 40.6737160001291 | 43.9282059368202 |
|         | 37.0526522140242 | 48.6621527194963 | 36.7356360093603 | 43.7396619462033 |
|         | 40.9901805728485 | 77.0226403968683 | 67.8570354010492 | 52.9609836781499 |
| FAT4    | 38.5332184743306 | 42.6939394537076 | 37.0642268327439 | 40.0322420615846 |
|         | 42.8510579683751 | 41.3553369544097 | 39.2010256871265 | 43.844855336215  |
|         | 40.0870341983328 | 42.4594149893798 | 40.0766543123257 | 39.2469742642337 |

|        |                  |                  |                  |                  |
|--------|------------------|------------------|------------------|------------------|
| FATE1  | 43.6706764143908 | 44.0409178714232 | 38.4043916290561 | 39.6292788039793 |
|        | 37.5556299264699 | 43.2805590023412 | 41.3594868055879 | 39.7509165247419 |
|        | 41.863927676552  | 36.9102644736882 | 35.2339574411711 | 37.5556299264699 |
| FAU    | 3202.8848520816  | 3726.73487426505 | 3884.2191293028  | 3999.32180022337 |
|        | 5438.34345794521 | 6483.09366281532 | 5218.25814076207 | 3776.54943917367 |
|        | 4406.55576617324 | 4299.4451139256  | 4550.56817942699 | 4344.25847766877 |
| FBF1   | 44.8378856799291 | 41.7614975630362 | 48.1682125052975 | 45.8102081251786 |
|        | 43.4544762830742 | 43.2312848495114 | 41.7614975630362 | 44.5029690493211 |
|        | 45.4154248354367 | 40.1613888954735 | 45.6706505553383 | 47.0130468198828 |
| FBL    | 572.968592371501 | 516.349618186681 | 578.601842980701 | 431.168903637888 |
|        | 1817.14004766564 | 759.566075437072 | 1359.9708539999  | 981.039763059681 |
|        | 970.379875059112 | 1012.0373748933  | 822.822769402853 | 828.403901345618 |
| FBLIM1 | 52.8427643366617 | 57.2231446406982 | 57.1595768494068 |                  |
|        | 44.604338271769  | 49.452985143568  | 42.623655455508  | 40.9784333688086 |
|        | 51.3472428383325 | 53.0357938671646 | 47.9853554913436 | 48.4717951775049 |
|        | 47.8931773060789 |                  |                  |                  |
| FBLN1  | 909.843512894628 | 624.51670158046  | 180.288784077653 | 472.982369155078 |
|        | 915.102542160713 | 2237.08790397818 | 1279.02702402372 | 5636.93532853955 |
|        | 1130.2486883492  | 2280.42953098693 | 1914.9556343048  | 960.526372655577 |
| FBLN2  | 181.814283147675 | 81.2673471767743 | 75.7140064167134 | 148.059385111127 |
|        | 76.3334723210842 | 751.150916058018 | 36.0366673493555 | 102.942921317489 |
|        | 60.4837400912239 | 351.039814818516 | 245.004434952963 | 364.628602969366 |
| FBLN5  | 102.797268694325 | 67.9259304928255 | 51.5292723244077 | 78.2301707073642 |
|        | 70.9638091288679 | 484.482971152057 | 46.0817481577316 | 110.599131324937 |
|        | 47.5183209236505 | 280.680953068339 | 254.322611819303 | 216.654612568853 |
| FBLN7  | 48.0201377454632 | 49.0697565324841 | 46.9040704638073 | 44.550322123994  |
|        | 54.802736966312  | 42.157627240486  | 37.4772922422734 | 43.5544347011646 |
|        | 39.2809305246091 | 45.6868589181768 | 60.4620008899889 | 55.4635297192076 |
| FBN1   | 59.987045425047  | 46.9919960628953 | 37.8386378737561 | 57.6511495792664 |
|        | 40.4639532172338 | 79.8026267036553 | 45.8980298854198 | 46.5717043290731 |
|        | 36.8127605061228 | 58.115198353247  | 45.310660704531  | 56.8534370691413 |
| FBN2   | 228.328635242684 | 69.5544840164738 | 51.4308501933893 | 85.3754356809649 |
|        | 134.468276542607 | 46.6872654833579 | 114.755820699611 | 224.509915754308 |
|        | 97.1271615802556 | 51.8412522234186 | 80.0651801266824 | 49.904979214379  |
| FBN3   | 44.436995101921  | 46.0713306971594 | 37.5597671487621 | 47.2009420656854 |
|        | 39.2608760193011 | 41.6590564937735 | 39.6535880152834 | 44.293922970134  |
|        | 43.7630587657205 | 41.2276963324981 | 43.0016969050339 | 39.5418280570561 |
| FBP1   | 385.064309855006 | 1465.08435775014 | 699.488969175268 | 2903.00880209344 |
|        | 610.678132881994 | 190.81617208799  | 1950.93175239958 | 485.310097523194 |
|        | 603.737787922337 | 3124.84336032646 | 2978.46032143413 | 2844.5506310828  |
| FBP2   | 44.0328992213727 | 41.4508241771315 | 43.3085358214154 | 43.1847628331565 |
|        | 46.4343327861696 | 45.1873487463472 | 53.4921736109774 | 36.9355798143571 |
|        | 44.8003345643334 | 45.2556760873335 | 42.2618615571566 | 41.9430737035925 |
| FBS1   | 75.0704619826557 | 78.7282247242035 | 74.9113162056974 | 89.6115806694241 |
|        | 72.6675345946258 | 59.4949177415847 | 67.1926218405833 | 137.403148427792 |
|        | 62.7205631511304 | 85.2634032339854 | 63.0763092522598 | 65.0495374451854 |
| FBXL10 | 198.432987946699 | 158.349509235411 | 119.051596183968 |                  |
|        | 146.931674964658 | 189.542991004953 | 90.3531863862054 | 197.171449112363 |
|        | 165.220069268347 | 207.768377497439 | 135.169625016001 | 110.992997780544 |
|        | 118.244019427757 |                  |                  |                  |
| FBXL12 | 40.8681871019812 | 57.4538469832241 | 57.7415362494584 |                  |
|        | 42.1273928203021 | 75.9909523932333 | 45.8325181856483 | 48.3411413510851 |
|        | 44.5029690493211 | 44.4395580493118 | 43.844855336215  | 53.7475011049549 |
|        | 51.138877923954  |                  |                  |                  |

FBXL13 146.007510897838 41.2598458726002 54.7855575216687  
56.9299697426319 45.3675390992851 52.1024135605001 35.4623691645629  
36.3405039629059 42.6366765186182 46.6598879466655 41.9083581529276  
44.2527566343661

FBXL14 46.9939712192224 41.3610369241157 59.4431489877328  
53.0284011078097 45.8051846088552 51.1621379498014 46.0228732507872  
43.844855336215 58.0722340887264 54.1683282066029 57.115361349315  
47.7962548556026

FBXL15 135.106756607914 165.468411096566 170.184914156265  
183.028254350275 130.758455807465 200.986069552443 184.087380444203  
98.0352049248004 138.50445813694 197.52820443061 204.7424893289  
143.112509176873

FBXL16 56.121460370892 42.6022652963326 44.4311655729487  
48.856176220627 45.6895223823001 41.9543948167375 41.1507980856436  
47.6952179922944 47.9035532886869 43.4885245598939 38.3684202018524  
39.6352613956998

FBXL17 34.8099089553046 40.148780650831 44.6032218589199  
37.1894304543751 59.4830424460714 48.1591264215184 39.6535880152834  
38.079222289614 38.7298222155532 43.401782064778 40.3452320167286  
48.1627097465883

FBXL18 38.957687788868 37.8217989841918 43.8495248991589  
41.7614975630362 44.8897737954573 37.9003288112261 40.6750540874299  
40.2382908228517 42.2577689927563 41.7405682794166 40.547835538778  
44.0451487108213

FBXL19 41.1523487516364 41.9894412416874 39.6451483836089  
39.9697332660833 40.2449343247539 39.2985791324641 43.6753843488695  
43.9366081640576 38.9834959368496 40.7063426028871 36.9060997041453  
41.3481355128089

FBXL2 66.1229691315616 57.1595768494068 52.8041782638549 43.3078542962968  
68.4961024593552 70.1074782747874 60.5125774827425 114.342447939197  
60.8635925649592 79.8511759086625 73.3321469094819 69.2213838763756

FBXL20 175.876518898179 81.5782824513693 107.501868837432  
93.9228336493696 132.946528291039 75.0310858627394 241.706783147271  
186.450759425396 131.068763088422 124.683201596193 112.281286038716  
133.43526498879

FBXL21 38.304249186058 42.2577689927563 43.0971787292711  
38.6414316877471 40.8873907150245 42.357910063876 40.6750540874299  
37.86982638952 44.4395580493118 45.1569741609597 44.1148826235374  
42.4607795638552

FBXL22 49.2595762436995 43.3458769998118 49.8344973836834  
44.9370339275041 34.0045980663271 108.493693862509 49.540449125788  
42.357910063876 43.4656637536244 95.5156363110528 96.5451512198207  
57.5372732453319

FBXL3 42.6575535390785 50.164201758929 43.6670755115848 46.9919960628953  
45.9104478407175 56.7429967489965 41.1886975241176 44.1311654985682  
53.4604353973381 43.2988017098387 48.720085661472 53.3059058105836

FBXL4 43.5710871617107 40.0527893189096 42.3536549114165 45.4634652319753  
49.0828761839116 41.0582900711341 42.7431359850339 41.8417024632349  
42.992884918158 41.4397539024976 43.1931731665131 43.0930293831497

FBXL5 87.8505898087072 125.559679916646 122.904323796484 186.301404367238  
89.5597629049747 204.251854342995 100.756165194192 75.3174199658042  
146.15014824361 93.6787442149817 112.281286038716 130.177232923004

FBXL6 152.441506175141 160.134344197725 143.383133346874 72.9752827496503  
181.45962058846 70.2553917409773 110.684033203048 85.5316122504411  
130.039674722115 76.5816788793344 85.1603116461516 67.7662831916293  
FBXL7 44.7044140979108 32.0823591288671 34.9849896310235 40.1804147506786  
33.7494761745342 47.2009420656854 40.3302268293707 29.4322896559759  
38.7298222155532 36.2435874904689 41.9083581529276 39.5418280570561  
FBXL8 78.3851687801705 48.4980626712175 39.6451483836089 40.1804147506786  
45.6895223823001 44.4619248757502 65.0031119608637 49.085741080241  
51.6731332961917 47.0055981216687 47.2134341420411 37.8490162439785  
FBXO10 54.2999306485758 43.6587492470348 41.528370959196  
55.7616447490886 44.4031868028216 46.4648868771662 49.2546642180676  
41.8417024632349 41.8197029429821 49.015238049903 50.0808824383821  
45.8546719310325  
FBXO11 167.653939596625 124.362644216178 148.477784236365  
157.189139558365 116.426770366736 160.566474370004 126.682296930289  
202.957014793417 159.827302305842 174.303754116679 155.795095438102  
158.364437886751  
FBXO15 48.2910530887214 42.1607322031054 43.1931731665131  
45.334106390212 48.0234896130991 45.9266745571724 46.9929836306816  
49.7309743973184 47.5564423692142 59.4309046716701 54.6089451252049  
54.7953298048942  
FBXO16 41.2424637338424 48.7847528954724 48.9944486068347  
45.7397504535169 40.148780650831 40.650742261428 40.9157352260901  
41.2551966132486 39.4762546236449 50.22432299342 50.3876754565799  
47.5025821041537  
FBXO17 45.1628509319299 42.81562453604 43.0971787292711  
43.7517118200398 45.7407938943718 66.1448688879431 44.1430395960362  
37.8238773905853 38.5026273921892 59.0216019867146 55.4694986901287  
52.9159950879327  
FBXO18 159.667153030627 175.936150174315 150.480087842118  
192.632227878708 243.27954361539 168.288592321667 213.204385896543  
143.042664581646 177.779514321673 181.45962058846 181.298709635609  
147.689479458785  
FBXO2 41.9918605927928 46.2677540712845 53.9256409473463 47.6687908290818  
55.0767527801658 43.9366081640576 40.9157352260901 46.4672637826582  
53.9612654850046 44.0719548209593 66.3481553496766 64.7346994616044  
FBXO21 249.002758392739 349.90835241442 253.267901237295  
134.258351436533 501.585246203512 285.511923726609 348.65230953701  
226.288835947947 371.866371754287 363.269936098507 317.406465928295  
315.880072026714  
FBXO22 64.668912004173 69.9984754033658 58.8188963227059  
58.9987341458519 80.0637650599841 67.4421428140671 77.2906963563431  
59.4674205670657 70.3117160953476 51.3851157261451 53.6122024523788  
67.6983931011126  
FBXO22OS 41.0608773166058 46.2286164776607 45.7968648044613  
45.8844325913247 43.844855336215 42.0574848021044 43.9450023643394  
37.1317006162938 39.3750969348308 40.4136535208406 44.3763859390287  
42.0424641526302  
FBXO24 38.8322787989855 37.8565969651679 38.2523289394497  
40.0195349109823 35.9058393060637 37.6411775481424 40.9157352260901  
41.8737744676674 40.4220196471124 40.8049408996274 40.5865217310152  
41.4061152929154  
FBXO25 45.2875173643252 42.3550738181144 52.2132783757422  
53.3039668850879 56.432280646473 52.3746819771982 42.2577689927563

44.3521099857368 48.692302914163 49.5265949137207 45.9104478407175  
50.7487159427973  
FBXO27 41.8409927585705 46.8954576545929 44.5134109184888  
38.6414316877471 50.5110359971301 38.4330755397458 53.1884505015411  
41.4508241771315 40.7847110517594 51.1169368198437 46.2560238004757  
44.9070250604284  
FBXO28 105.621640443267 179.322661675979 187.711309781257  
157.979422616649 153.028210322286 120.850874262069 175.74424749223  
199.57367025082 142.34144664795 98.9222919411067 120.881290860109  
155.6723334711  
FBXO3 57.0581769379589 71.8887764487177 77.720889005668 58.6481644777552  
65.3019328668633 88.2427413480277 58.3164247463092 68.7342341724306  
79.4916415027015 57.4102366425512 64.4837166864084 77.2413564369342  
FBXO30 62.9672234302539 58.3627863274274 60.1874689914535  
72.3607760798558 60.5806691666221 100.962000280931 65.644767142472  
53.1052228246467 50.1603795873336 83.9236799134394 80.5508300225954  
85.3431175579775  
FBXO31 201.006934353364 190.854807132673 221.847615564378  
161.870972980732 147.704325041249 411.047310950296 203.808195515747  
184.025325436339 184.377148097206 381.426926151034 466.935292808402  
242.282363793567  
FBXO32 327.193250073326 98.9988668602468 88.9928368134295  
151.111664091983 102.430234282331 667.837116137964 91.1707965298745  
95.2292899846287 133.487946450906 175.345244033253 228.185436206823  
163.493389267264  
FBXO33 208.22938545273 306.487935692954 242.751164798133  
410.808988840343 217.848539722853 302.143385957116 288.447603611962  
237.100802227545 365.517719684028 211.790532633462 270.303708972854  
246.09270373893  
FBXO34 278.378459771943 142.731630650904 136.125236142909  
191.482692108417 169.970634268117 120.392561825049 187.086662645246  
249.776078532596 303.281551940647 235.613437037284 266.07996221256  
394.073743195755  
FBXO36 35.4287975493553 43.0227387991135 41.437237454134  
43.3078542962968 40.3452320167286 39.6251842352088 39.7576136507593  
40.2382908228517 38.5252456306656 42.9866214102525 45.7328341667151  
35.3525469364579  
FBXO38 103.010279797396 115.357402077859 139.385367339095  
125.62281563325 92.0606634977068 98.0023132593711 81.7967230859562  
87.3085516526362 102.899135663993 110.399579382196 120.046457114882  
126.838679504229  
FBXO39 41.6354649482853 36.89524015739 40.7620472083159  
40.3180310664156 37.0526522140242 41.2567470068038 39.1539892144371  
40.931294690669 39.3750969348308 37.1275334308172 37.9230440150891  
38.6454098044474  
FBXO4 55.7896684777901 58.9128486419884 63.6838561637637 68.087403590986  
64.193536444915 63.5295088521896 85.5625396380282 56.9719061986797  
63.5489745357606 57.5713378330876 57.6831182451733 61.9036392303558  
FBXO40 39.9697332660833 38.5252456306656 37.1643693306382  
38.3166554965434 40.7779767565889 39.8455060654531 39.5496902678788  
37.9837233601316 41.9635525160083 42.5664883002833 43.5710871617107  
43.7672102682067  
FBXO41 42.8036731479932 47.6914221838216 41.6977706798234  
47.2009420656854 51.0107745412152 48.0350549043063 46.9929836306816



47.6952179922944 40.5912213523345 44.6918600441328 49.8393069675192  
47.7962548556026  
FBXO42 39.9697332660833 39.0894172982439 34.1806289878747  
41.4273122914951 38.1644569189523 37.9951997351435 29.9775071862804  
41.3506832276112 32.8704945047196 29.745266251498 36.8282383070068  
31.8554734753953  
FBXO43 40.7609952437622 40.6723334103791 40.0998167098057  
42.0102671859606 42.9090346219023 40.1428591998404 42.4939802311136  
40.5640952422779 43.6670755115848 43.7303813515864 44.3440839686558  
41.9430737035925  
FBXO44 39.3303857231606 46.6075785304453 56.8903641597175  
42.5664883002833 51.3033654237232 41.0582900711341 45.2806199505029  
42.985929467107 44.4812539947185 44.6217658428521 42.0750889188255  
36.2131679586121  
FBXO46 110.440072569721 137.016387648703 100.386011517899  
84.5411149237799 151.01326330819 80.9821967801845 131.258204302177  
98.8478655411492 123.368987753537 85.2893380711323 107.325456368022  
75.561262816077  
FBXO47 43.0001432913058 33.1817617228171 42.0621425894624  
41.8778873678551 37.6527901109005 38.5252456306656 41.9393838138203  
41.3506832276112 36.197424053556 38.957687788868 39.153226699662  
38.5279745308203  
FBXO48 41.9407041937973 42.7775752471711 40.1985790927248  
45.0017158586743 45.2556760873335 40.4359177791566 39.9519547348106  
46.2779564481158 43.3744503319109 42.8936990772838 45.447310733898  
46.9867599298218  
FBXO5 78.812106589086 78.258486366912 60.7985356140269 42.357910063876  
94.0140258999054 60.6548851977964 83.9873645051122 49.2019743609873  
68.6379135603075 42.7275315121163 44.8372404608604 51.1740855632044  
FBXO6 124.599352191013 176.963666283432 138.362914843774 183.918927595056  
118.376686726902 120.231435193839 178.675242612997 129.309742451628  
137.916048669047 87.5967418612698 102.027922691582 98.3142231283069  
FBXO7 131.79241580689 120.533617429145 140.992072231913 131.027905075083  
113.107942979653 137.034037711549 140.175068871414 114.533239859288  
132.684895918889 118.027323513177 106.10668428032 123.205099929475  
FBXO8 106.804269453898 133.329721547016 138.568626520133 125.934747056908  
94.6432868887401 187.689343320587 95.0190813062982 83.3826639718546  
135.138667957956 108.39424630351 130.524308471577 175.876518898179  
FBXO9 42.0532901689036 43.3458769998118 41.437237454134 38.0512214519387  
39.512606833112 44.1737502492846 40.745874931373 39.4102279045485  
43.5669306063196 39.6719190054379 42.59352468383 41.3948836161924  
FBXW10 37.2474303302343 38.2263227947189 37.8386378737561  
38.2041059863839 36.8059561571675 34.5886782974123 42.629412460409  
43.844855336215 42.7150227340364 42.2614524730856 37.2892641289258  
33.0217499673686  
FBXW11 134.581057139589 108.111248374368 136.843285454801  
115.557690369703 122.482560090133 146.42128243217 108.407179111715  
113.30970148672 125.290426098227 124.204392146484 139.862070204656  
147.471179343348  
FBXW12 46.441301934328 36.3110701990588 36.8730514568925  
38.9534635879195 38.3561682218911 37.5887129572848 43.1931731665131  
40.4359177791566 38.9834959368496 37.6383530120621 36.3390947880186  
38.3291713594599

|        |                  |                  |                  |                  |
|--------|------------------|------------------|------------------|------------------|
| FBXW2  | 116.685453817071 | 143.233722839451 | 89.4747568145717 | 146.719419166639 |
|        | 114.888828460086 | 122.904323796484 | 132.364260893831 | 116.547937420457 |
|        | 114.935101645207 | 93.2226507128199 | 120.142759111608 | 86.5564881117807 |
| FBXW4  | 114.666088291556 | 199.604105066243 | 225.960701908311 | 106.8866235778   |
|        | 110.869341159607 | 216.943972794603 | 133.576489624155 | 159.52633805025  |
|        | 158.091115152384 | 305.684635013927 | 271.50380898418  | 238.246319539302 |
| FBXW5  | 91.5202521578181 | 82.0102749744973 | 72.9051985681184 | 114.959624673123 |
|        | 77.3931945683613 | 90.1830062843449 | 104.773064067069 | 81.8868841896039 |
|        | 80.8078050043929 | 82.0149542477384 | 88.8664680253555 | 74.4365426051588 |
| FBXW7  | 56.0477607422828 | 76.034392064609  | 67.4534389579576 | 118.714977712617 |
|        | 80.428712610358  | 66.4841955249254 | 85.9692990407066 | 70.355653090662  |
|        | 68.0556717366572 | 82.1062834830477 | 67.4421428140671 | 69.8505620106065 |
| FBXW8  | 52.9749819616038 | 50.7046706880325 | 58.1734393141894 | 73.0070079786149 |
|        | 59.8698813493379 | 60.0765286625112 | 52.0942589368478 | 58.676230030835  |
|        | 56.6079099547057 | 56.3441077510744 | 55.6494029744804 | 66.3558126170575 |
| FBXW9  | 77.3752541676627 | 87.3385669984704 | 102.607924735378 | 71.2572485987604 |
|        | 228.747320301945 | 60.5803031036931 | 125.052841200703 | 129.309742451628 |
|        | 108.589036223189 | 87.7918574811458 | 98.2581979415778 | 77.7506984396769 |
| FCAMR  | 39.0237504776589 | 42.466333667839  | 39.1799070031819 | 38.5707420487455 |
|        | 41.0885562160946 | 39.4512099697623 | 40.4359177791566 | 44.1311654985682 |
|        | 39.7162631015511 | 40.3458948319669 | 39.7342718293432 | 41.9430737035925 |
| FCAR   | 319.092568066532 | 141.808284719109 | 138.972884942374 | 330.550018306903 |
|        | 146.90802741139  | 132.144567805599 | 281.016474354764 | 616.265771322835 |
|        | 141.108035324183 | 468.381233506231 | 538.427311162325 | 418.01691355558  |
| FCER1A | 53.7507429765038 | 71.5249259772583 | 65.2670315837785 |                  |
|        | 190.647389246848 | 50.8875036861067 | 224.749607192071 | 60.9648845690177 |
|        | 77.8946473414547 | 76.1869593072029 | 213.162949250252 | 82.1659654020827 |
|        | 93.1067450332473 |                  |                  |                  |
| FCER1G | 607.431621448599 | 198.922575188741 | 269.801170545042 |                  |
|        | 3941.3269626913  | 194.703024752864 | 695.255317861845 | 340.662853333208 |
|        | 270.394857925086 | 84.5998418020787 | 127.213248611204 | 91.3723635213821 |
|        | 301.79813401066  |                  |                  |                  |
| FCER2  | 40.7609952437622 | 39.6123051184545 | 36.1042012504758 | 60.9379216295576 |
|        | 38.0598374201407 | 46.6872654833579 | 43.1931731665131 | 42.4580504587581 |
|        | 36.3649677956953 | 37.7315666632629 | 41.8168470823451 | 38.1421709520616 |
| FCF1   | 106.356074933606 | 66.6615349144199 | 85.8945498067934 | 87.799979434508  |
|        | 82.6983700200815 | 70.3309641302984 | 112.930164222877 | 107.232979387172 |
|        | 84.1254258487497 | 95.5156363110528 | 109.005343769033 | 98.4699679900651 |
| FCGBP  | 56.3947991135032 | 72.2527203451447 | 94.5055588176321 | 41.7614975630362 |
|        | 80.3768086728545 | 49.9242614590886 | 79.7564155881026 | 44.1702105889066 |
|        | 143.053774297331 | 133.998375673985 | 96.1825551158198 | 108.479856042609 |
| FCGR1A | 78.2644076847509 | 42.8542642792862 | 40.1985790927248 |                  |
|        | 166.304210248623 | 39.7568367479301 | 64.2174369755376 | 42.629412460409  |
|        | 47.6952179922944 | 39.4762546236449 | 43.2988017098387 | 41.3553369544097 |
|        | 39.9519547348106 |                  |                  |                  |
| FCGR1B | 83.8113149043718 | 55.3951994031724 | 54.6820069269589 |                  |
|        | 229.971492699272 | 46.3607182640185 | 120.149188463323 | 58.5588286084726 |
|        | 51.9447450229707 | 42.38204124321   | 43.7303813515864 | 37.9553529562144 |
|        | 48.9944486068347 |                  |                  |                  |
| FCGR2A | 138.599959012396 | 89.4504034432321 | 85.0162042963215 |                  |
|        | 827.365231733511 | 96.3918711895208 | 190.099949303905 | 142.03031230486  |
|        | 67.3976855661302 | 48.2123120250343 | 49.3654837541353 | 52.3187919317561 |
|        | 68.1513215633609 |                  |                  |                  |

FCGR2B 50.0466349801009 40.4003119241613 40.2455972565968  
 102.899135663993 38.0598374201407 57.5398008565764 41.5421429082231  
 38.7023886970298 39.2566275301834 40.8970401536578 37.8372168909583  
 44.7401523707775  
 FCGR2C 36.4564050256915 38.2263227947189 35.4484652445078  
 37.4223289687135 40.9950639693255 40.8634043028528 38.1793598983615  
 39.9576138799997 45.2897806651929 39.6719190054379 40.3452320167286  
 38.4330755397458  
 FCGR3A 42.466333667839 43.0971787292711 44.7255207589606  
 46.7577982595088 49.1263312877155 41.1090481599939 41.8799523546812  
 44.2527566343661 48.1578509702472 45.6355219961567 43.7585538437696  
 47.3992733452821  
 FCGR3B 72.9154861179393 54.113533179847 62.6885730386156  
 389.994289973076 50.6470461863549 89.1290937615998 119.846620703059  
 49.7922355293199 50.2223403889892 51.1169368198437 49.9338905397767  
 48.8319884367456  
 FCGR3C 454.551748488397 493.705301673753 355.495119544081 1073.84987604662  
 424.085665569421 1349.09482344633 366.326747630465 425.776214512634  
 397.798003824167 571.170643523692 584.724083441601 465.981133154896  
 FCHO1 70.9419509323007 98.2280780221631 59.2012779686869 71.0211264570699  
 146.551751666276 48.8744644207821 63.928488869459 110.287699369482  
 60.164635768614 39.7835513496873 44.3763859390287 42.0424641526302  
 FCHO2 50.9381343674699 54.6793272901524 56.6888826857797 72.89602312859  
 51.2525124735102 54.1440452292081 55.695361644141 56.3560498705517  
 62.370559099758 78.5141640924736 57.4622430729629 67.3183506012892  
 FCHSD1 39.4250105372135 39.8695929627783 48.5460684639932  
 41.4636047919453 45.310660704531 39.3565586789274 38.3291713594599  
 38.745552403895 45.9732108120834 45.4882438975269 45.6706505553383  
 41.6031169661721  
 FCHSD2 116.547937420457 127.525206038902 124.214669663291  
 220.597255695837 92.4350913779886 175.114727506747 118.483499958227  
 97.9497090233081 96.0838701986116 127.213248611204 117.586275152761  
 126.682296930289  
 FCN1 88.6663961027926 188.457593309678 280.034472186873 2091.0611913538  
 104.309778306722 398.43592055172 408.216955625565 124.94083215058  
 44.8003345643334 70.4895190282848 60.0105984819248 55.9555622193202  
 FCN2 39.4250105372135 40.4772513262052 39.5954353681031 38.4699622716254  
 39.2968590261598 38.4330755397458 37.9946685306274 40.831207953647  
 38.6322728994674 37.3687900733549 37.9230440150891 39.8497227447888  
 FCN3 49.7827734675743 55.4106986624448 56.8168526942685 63.5195937348531  
 44.3557408297309 37.5469247328848 37.9430145836712 44.1642484298135  
 37.5723609429239 40.5090849993014 41.9908237694988 39.5748670524951  
 FCRL1 39.3709357615493 41.4508241771315 40.6737160001291 42.1273928203021  
 38.745552403895 38.7340969861754 41.1507980856436 40.931294690669  
 42.0621425894624 41.3321861371202 43.5710871617107 43.7672102682067  
 FCRL2 41.7397731376692 44.1519466943185 44.2771355310435 47.0874209746031  
 41.8407088454059 40.650742261428 42.3074504864935 43.1889516931076  
 41.6616444147804 42.0217776707284 41.1638563416981 41.6086894860496  
 FCRL3 41.6354649482853 45.7023929486654 43.826317180678 44.0451487108213  
 41.9495387255163 42.0574848021044 42.2577689927563 44.1561004152248  
 41.9180247412837 40.8600431177315 41.1638563416981 41.0254123215328  
 FCRL4 43.9309845324767 39.9697332660833 36.0306975524309 39.066284740632  
 38.4540849632254 34.7983399096627 41.0381860307445 38.8495095797881  
 37.5469247328848 35.93950183586 36.43924066428 33.5578650644246

|         |                  |                  |                  |                  |
|---------|------------------|------------------|------------------|------------------|
| FCRL5   | 45.1569741609597 | 46.0713306971594 | 54.3554233228353 | 119.253559091088 |
|         | 42.3536549114165 | 48.6621527194963 | 46.8613212048981 | 48.9826868640753 |
|         | 45.2897806651929 | 42.1622837416589 | 40.1742127891824 | 45.9104478407175 |
| FCRL6   | 43.844855336215  | 41.554942319225  | 48.1331309338997 | 43.074472921841  |
|         | 47.8075998240396 | 43.3785777889265 | 40.7910160811527 | 44.0390019242862 |
|         | 34.1294694030979 | 42.4594149893798 | 42.4580504587581 | 46.7182294568603 |
| FCRLA   | 36.6480005877129 | 53.9275079525238 | 43.7630587657205 | 114.520410790135 |
|         | 72.6675345946258 | 42.750861693377  | 43.1931731665131 | 51.2623287419357 |
|         | 64.643220133046  | 37.0320432433314 | 37.0180934800573 | 38.0452862258803 |
| FCRLB   | 148.558544568518 | 689.738256133922 | 757.257495810249 | 213.768352764473 |
|         | 281.07879968121  | 89.4747568145717 | 342.829992044257 | 68.9522412475296 |
|         | 454.185408362583 | 102.294142438313 | 138.349952332963 | 105.05842887748  |
| FDF1    | 414.293172794592 | 574.847203528544 | 646.791777335656 | 384.080719411412 |
|         | 689.738256133922 | 409.312313055794 | 670.271164195182 | 610.853753376105 |
|         | 1211.8832855325  | 570.204236909398 | 484.350946851556 | 830.295872113419 |
| FDPS    | 116.426770366736 | 63.1780854659428 | 76.0240426902567 | 65.7321440516177 |
|         | 87.3957386451235 | 61.7091923488929 | 113.692418102755 | 95.1037791424727 |
|         | 89.2627798562694 | 69.4131195465674 | 69.7855392178808 | 80.4404044229341 |
| FDPSL2A | 36.2496364442264 | 43.0227387991135 | 44.4311655729487 |                  |
|         | 41.7614975630362 | 48.7288537840562 | 39.7394181011603 | 42.2577689927563 |
|         | 41.7419877611072 | 45.4799270968969 | 39.0648733099061 | 46.3370338074996 |
|         | 48.7814131120945 |                  |                  |                  |
| FDX1    | 40.3478825593224 | 61.3838877877366 | 55.094385444315  | 53.2046867327331 |
|         | 51.2525124735102 | 55.6242009731278 | 51.0013344286851 | 48.6441988290952 |
|         | 62.6386437936516 | 50.1649089793069 | 54.7883681830995 | 59.987045425047  |
| FDX1L   | 144.562563943103 | 107.176733647834 | 110.734219768388 | 108.486774731927 |
|         | 222.05036990665  | 162.049698241573 | 184.269633116351 | 180.128769312512 |
|         | 150.685575301101 | 186.101626144637 | 190.703466372947 | 139.847976281228 |
| FDXR    | 39.0620487644635 | 43.3458769998118 | 37.634370327756  | 37.9875302985336 |
|         | 31.7270223471062 | 38.5252456306656 | 37.9430145836712 | 38.6454098044474 |
|         | 36.9487027386087 | 37.5597671487621 | 41.3145333832821 | 38.8132170743603 |
| FECH    | 54.1437245703767 | 46.0713306971594 | 58.7783310649709 | 60.0856496605043 |
|         | 45.1137938810047 | 84.7816603427127 | 61.8571521441451 | 47.2864663693787 |
|         | 74.1031848443392 | 72.42732668079   | 67.5417980425932 | 64.4766262198475 |
| FEM1A   | 340.962490240304 | 386.640440174303 | 403.796135347069 | 315.163147652199 |
|         | 585.237875919074 | 266.439343650315 | 263.170107025525 | 409.312313055794 |
|         | 348.123960682064 | 401.45848063233  | 295.848968688724 | 241.222680673439 |
| FEM1B   | 60.8357760968871 | 74.2653431904071 | 59.6565330440648 | 74.4365426051588 |
|         | 72.6675345946258 | 68.3234331335073 | 76.3583555666815 | 110.983311402531 |
|         | 72.4220552950926 | 66.1851600557127 | 78.3542840447759 | 65.2771529943605 |
| FEM1C   | 162.735117558467 | 115.221134337342 | 101.935321521672 | 197.540681021755 |
|         | 89.6313467455698 | 210.437554813031 | 107.895235897156 | 160.479699603187 |
|         | 143.761359357965 | 203.759116151774 | 134.776408077533 | 174.718984988254 |
| FEN1    | 364.141443387516 | 235.33716196909  | 155.730834354163 | 188.336316985251 |
|         | 608.579654909865 | 104.986694941968 | 731.071171171638 | 391.658764737446 |
|         | 385.827237353675 | 83.5895816521251 | 79.4832790698673 | 91.2297566574871 |
| FER     | 48.7646976789783 | 56.6927078228789 | 58.637422084759  | 67.474556589181  |
|         | 48.0234896130991 | 76.331185787832  | 45.1017494688414 | 59.7744650739434 |
|         | 65.7321440516177 | 63.197604174872  | 61.3149617644002 | 68.1513215633609 |
| FER1L3  | 516.704027135707 | 350.106705208362 | 731.071171171638 |                  |
|         | 435.094968715663 | 402.571146447946 | 770.715044136717 | 601.139894733857 |
|         | 385.36587480414  | 482.071795051342 | 680.279119780451 | 899.223276238109 |
|         | 985.328482076985 |                  |                  |                  |

FER1L4 334.813163079302 905.76958446454 1430.73068989193  
173.100153934025 313.233036704221 75.0685015344103 272.828896268482  
481.145001682177 420.401914084346 665.122091380755 629.301646370726  
484.218958528411

FER1L5 45.1569741609597 42.2577689927563 45.4865173433646  
44.7980740332174 42.9090346219023 41.8613406887824 46.3611042575528  
43.4885245598939 44.5678064264717 43.8943892311541 45.7328341667151  
45.5342598239058

FERD3L 43.3638918705225 40.7952353240579 43.8495248991589  
40.0698728584484 38.2496050953547 43.0860383229288 40.9157352260901  
42.9301944191913 48.8067321016961 40.8970401536578 46.1673159982664  
40.7704587752083

FERMT1 55.6268253440479 309.39599482851 256.215133513379  
58.3475983630509 302.978457293429 76.5888466260562 224.976641879383  
67.6082563445866 128.05521008708 186.64040927334 207.489116930705  
195.893183546434

FERMT2 632.577797921655 147.841274204532 204.251854342995  
372.473625569296 224.749607192071 1723.37649434054 126.079949368634  
254.322611819303 140.187433247353 1188.3486464341 1043.26325848938  
1325.2479053325

FERMT3 108.881703882906 122.952515297686 96.9158008116945  
572.667024472672 62.8270556619309 140.629562742418 106.25367135266  
78.253478446856 53.0704519012492 62.0500352705887 62.1796792097014  
57.6860752168769

FES 133.067727272864 164.941191767024 139.543015878846 318.846373031568  
90.5359675350156 205.991317474325 278.773982275525 224.069916407012  
100.937651342589 162.272853632419 112.13936276116 108.213380368446

FETUB 46.3390850717989 37.10170285405 42.5406888281114 42.357910063876  
44.3557408297309 43.9724628401189 45.6042625176633 38.745552403895  
45.8325181856483 41.7405682794166 41.0050831223107 37.6557714476853

FEV 40.2543341073001 34.0382693188794 47.4740726032707 42.2496337895968  
41.467005949568 38.1169703906207 49.1067959632109 38.745552403895  
41.074824727477 37.7315666632629 41.3553369544097 47.2131144508464

FEZ1 81.5966838909987 84.4111182389028 81.0766789453664 74.1425714439424  
98.8821018441815 191.631209717054 203.373397813051 67.4534389579576  
63.5896512396512 114.972374827795 109.922909644299 163.585662735512

FEZ2 629.301646370726 330.391945158969 431.727858902449 419.46223841313  
238.584514797019 560.802447943839 419.993482471924 479.079946537291  
274.134201700259 499.356036793973 472.982369155078 594.611678976716

FEZF1 37.7384958256497 36.7976562409506 40.931294690669 38.4208429103799  
41.3755760434934 36.1190722948669 45.1017494688414 38.5457716679071  
43.9450023643394 38.4187686307607 37.9230440150891 41.0657892043496

FEZF2 35.9305494063137 43.5873188565519 41.1367478979484 35.9521941716188  
36.6354013629791 37.0180934800573 40.1235656101329 39.2672712041774  
36.8127605061228 36.3612409063792 37.2892641289258 41.0657892043496

FFAR1 45.7356815244513 42.5269793679335 43.9450023643394 56.4578213622965  
44.5668141895992 38.9378717994178 37.3799542961839 45.2806199505029  
41.7627910693483 46.1390887492649 52.5154971256566 40.0557788909923

FFAR2 42.2455707947223 60.2547250212462 54.0536858212253 645.114504971255  
51.7983110178095 82.4900927793125 192.470747766298 48.272324215504  
46.0106098064475 48.2596564318071 46.4753015651202 38.1421709520616

FFAR3 45.7356815244513 43.7644428186265 42.5406888281114 69.1931891474114  
48.6224651100733 44.7804080899431 53.1884505015411 42.9301944191913  
45.1899271235974 44.6918600441328 44.553780984244 45.9693232070002

|       |                  |                  |                  |                  |
|-------|------------------|------------------|------------------|------------------|
| FGA   | 69.9984754033658 | 47.6534909074889 | 47.3501115999636 | 48.9277656327075 |
|       | 48.9627346956003 | 50.8114699212931 | 52.3406235100961 | 56.5402453093703 |
|       | 53.5546088535897 | 54.7105548454293 | 51.8699412145606 | 51.0013344286851 |
| FGB   | 67.0163226819964 | 43.683792219729  | 43.8495248991589 | 43.7410507935043 |
|       | 37.956732373465  | 40.8970401536578 | 42.0605906240248 | 41.4905114972525 |
|       | 45.3407340000202 | 43.8943892311541 | 38.8507804383261 | 43.4709415392696 |
| FGD1  | 68.2614370871382 | 55.9644250454789 | 68.4720753153522 | 62.3936376596431 |
|       | 64.193536444915  | 78.9521593412581 | 128.542999559673 | 76.6868184563568 |
|       | 69.2001494999588 | 83.1874704625702 | 60.5608545741456 | 61.4366256816323 |
| FGD2  | 76.3933911546385 | 166.25909484446  | 78.3378279021752 | 236.374695859748 |
|       | 60.7495043977707 | 81.1416376689959 | 118.376686726902 | 96.2680061150588 |
|       | 74.8706881113318 | 125.786923817078 | 87.539553421006  | 119.993761317523 |
| FGD3  | 110.88526946931  | 298.313562383092 | 225.35760689842  | 429.65084326307  |
|       | 174.332103484796 | 104.305801811472 | 604.951648398924 | 493.322302312578 |
|       | 213.309547409053 | 475.621740714165 | 445.875994521817 | 439.770250139925 |
| FGD4  | 47.3791873993182 | 41.8073910693411 | 44.6032218589199 | 120.068630086702 |
|       | 40.3452320167286 | 42.9695585740813 | 48.3411413510851 | 39.3709357615493 |
|       | 56.5094373275922 | 49.7259371799014 | 46.7386599624801 | 48.6037684272115 |
| FGD5  | 105.45765455249  | 144.046404221564 | 300.121875447445 | 157.095926797414 |
|       | 89.0203733091224 | 223.078923630983 | 54.8074655158941 | 119.088986733238 |
|       | 66.7750249658122 | 101.954354107731 | 122.688508930699 | 81.6458112867541 |
| FGD6  | 55.7246872330059 | 53.7332797903102 | 65.2670315837785 | 47.9915414951747 |
|       | 51.5888395924843 | 60.5803031036931 | 57.1070449050465 | 56.0496524902806 |
|       | 60.164635768614  | 40.4136535208406 | 45.7328341667151 | 56.2804354745795 |
| FGF1  | 47.1962846565261 | 38.2263227947189 | 45.5561520014275 | 45.4634652319753 |
|       | 43.6782245625941 | 38.7340969861754 | 39.3895791800635 | 42.9301944191913 |
|       | 44.014761416117  | 41.0529409675663 | 43.3085358214154 | 45.0035308952466 |
| FGF10 | 39.5676051939342 | 41.7337506166619 | 47.0055981216687 | 42.5664883002833 |
|       | 41.1868052124344 | 48.3686935595826 | 41.253645578517  | 41.2551966132486 |
|       | 39.6609238036815 | 41.2276963324981 | 40.8225507267584 | 46.3411353377615 |
| FGF11 | 82.6983700200815 | 49.4067286971348 | 64.2404293863468 | 49.3654837541353 |
|       | 42.1650127805175 | 50.4022543872993 | 50.0088611244948 | 53.7378346199838 |
|       | 97.2425832658887 | 46.5650556481721 | 45.8180710486329 | 50.379587451669  |
| FGF12 | 41.8890826572422 | 43.7644428186265 | 40.3384318592985 | 38.2516470858206 |
|       | 46.1804647841331 | 39.9871741554388 | 48.5721799977026 | 50.7964800730186 |
|       | 46.7353388797135 | 41.9219580093938 | 41.7614975630362 | 41.4061152929154 |
| FGF13 | 46.144656267199  | 40.0877366724081 | 40.1572444265517 | 38.1464799985979 |
|       | 40.2903961886288 | 54.1859679451613 | 44.6032218589199 | 41.4508241771315 |
|       | 40.7847110517594 | 39.9948390976317 | 42.0507048990507 | 40.7063426028871 |
| FGF14 | 39.4250105372135 | 37.6383530120621 | 38.0057289062111 | 39.6705473876526 |
|       | 39.0564222526273 | 42.357910063876  | 42.629412460409  | 43.490078970589  |
|       | 35.1155486926999 | 41.3641352453779 | 40.4504608195666 | 40.2237056928605 |
| FGF16 | 33.9561816279577 | 36.4002279956519 | 35.2101597814352 | 35.2143190355414 |
|       | 38.9496515344837 | 37.5887129572848 | 35.3362091871364 | 34.806104801006  |
|       | 41.863927676552  | 35.0668743708816 | 37.5583886316038 | 34.806104801006  |
| FGF17 | 39.6609238036815 | 41.554942319225  | 39.6451483836089 | 44.265834798964  |
|       | 41.1868052124344 | 40.040778349137  | 38.941855825269  | 42.9301944191913 |
|       | 46.6944238390932 | 49.3000844711116 | 55.3942006156899 | 42.1537476443423 |
| FGF18 | 49.0462740100128 | 45.4757965005055 | 39.3303857231606 | 48.055683217958  |
|       | 45.7407938943718 | 61.1022920882065 | 44.8643898647322 | 52.3579564953125 |
|       | 39.7162631015511 | 52.3304586399695 | 45.7792335738285 | 44.4475838947656 |
| FGF19 | 43.0930293831497 | 46.6996902348633 | 39.8299340037009 | 38.3166554965434 |
|       | 41.1868052124344 | 43.0860383229288 | 43.8206425661746 | 42.7431359850339 |
|       | 45.2897806651929 | 36.3612409063792 | 40.3452320167286 | 44.7401523707775 |

FGF2 39.3100256336821 42.3550738181144 41.6977706798234 43.5962371290832  
37.6119337673806 66.1650385535549 40.6216891610774 45.3389970694851  
43.3744503319109 46.8954576545929 51.0492389286271 53.4735821194294  
FGF20 38.3459820930759 42.1372626664516 42.9641759692926 40.3180310664156  
42.0709558258414 41.554942319225 44.8643898647322 40.931294690669  
42.3138951003676 42.0621425894624 41.2598458726002 44.1452943804044  
FGF21 44.0328992213727 41.9894412416874 42.9641759692926 43.074472921841  
40.7273974755431 42.2577689927563 42.9803717121865 41.3012916486748  
39.2497056720346 41.4397539024976 42.0750889188255 39.7844133452634  
FGF22 43.3638918705225 42.1607322031054 42.9104454767916 40.4359177791566  
40.0599807618105 37.9003288112261 40.5585676679482 41.2551966132486  
38.2215591930186 38.4187686307607 38.4689132737495 37.2810767789306  
FGF23 41.7835997867848 38.3874422458351 41.0718387273629 39.6705473876526  
37.1565984182084 41.0909708790194 43.1602899171656 43.7731874801003  
40.5912213523345 42.3606390470387 39.5399188536544 44.1063440402552  
FGF3 42.442231667357 40.716553247236 42.5406888281114 39.1706564265495  
41.7929491793697 36.2768299545794 37.2892641289258 41.0381860307445  
47.1744296124496 36.6893251782922 40.4504608195666 42.1537476443423  
FGF4 33.5994525227062 32.742439449766 33.553634633839 40.3180310664156  
80.1294564809102 40.650742261428 36.197424053556 40.047314525032  
35.860430241131 34.8137085420423 32.406093465115 36.449101775775  
FGF5 41.2424637338424 42.8542642792862 43.3465699185405 42.281606728072  
46.9906120932727 42.808889470973 44.8643898647322 44.0736170668178  
44.4395580493118 43.8943892311541 42.2510526338368 43.5420658412177  
FGF6 41.7835997867848 37.2810767789306 41.4613628725541 35.1738399826814  
38.9496515344837 39.5581166303303 42.5660695551615 38.6454098044474  
37.241386734757 31.6981395162348 39.9070785037411 35.2448979801094  
FGF7 37.3463875295726 39.6123051184545 42.3536549114165 37.4223289687135  
42.0709558258414 60.2867996701867 40.5585676679482 37.5511560880902  
38.0213051227859 45.0155543555707 48.3847843498476 48.7814131120945  
FGF8 43.9309845324767 37.1485601150873 42.7881985796277 42.7489468897708  
40.4321207743917 38.385865183581 42.0605906240248 40.7799172560245  
40.6503965580437 39.3303857231606 40.1742127891824 40.7704587752083  
FGF9 39.0620487644635 42.8542642792862 42.640829914102 37.9875302985336  
43.1252272136667 77.9085946827079 39.7576136507593 48.0582855095143  
38.9834959368496 151.912182086236 217.721787448311 85.9286114777649  
FGFBP1 174.860894067053 39.5050383901884 44.4311655729487  
54.2886483704949 142.1823033942 45.2852528185486 60.0981687048269  
487.749060801066 877.673009984357 37.8217989841918 39.9070785037411  
44.9070250604284  
FGFBP2 38.6454098044474 39.2907645923217 48.1331309338997  
60.7741670229412 39.6535880152834 47.2927436772465 43.5627649099623  
41.0381860307445 43.0930293831497 51.4454142248566 52.022479439889  
42.8864415494484  
FGFBP3 38.5648843914189 38.9338521051669 46.3411353377615  
39.6292788039793 49.7235523248653 39.0266821712099 49.540449125788  
45.1714698794331 47.27543600687 43.2988017098387 42.7275315121163  
41.863927676552  
FGFR1 47.2258994932516 44.0578434007778 42.59352468383 39.3750969348308  
44.5152708955623 54.1773909134233 41.2884376047238 40.8880530359822  
40.1751033251565 41.6657053704762 40.6876726817234 45.4171570229279  
FGFR1OP 70.083473392272 71.7624419474395 71.5484567134601  
68.6379135603075 72.2665537421443 57.2767879969284 74.9059650336395

|          |                  |                  |                  |                  |
|----------|------------------|------------------|------------------|------------------|
|          | 75.2101993995344 | 60.0736861987141 | 50.3388505346542 | 56.6884575165011 |
|          | 55.3563533836982 |                  |                  |                  |
| FGFR1OP2 | 41.4508241771315 | 46.29198852834   | 45.1569741609597 |                  |
|          | 61.5515639412892 | 44.5668141895992 | 51.3886035574416 | 60.5125774827425 |
|          | 42.9301944191913 | 69.1129431075514 | 42.8936990772838 | 40.723990462047  |
|          | 57.2350830635912 |                  |                  |                  |
| FGFR2    | 39.7576136507593 | 43.0227387991135 | 43.1931731665131 | 40.4359177791566 |
|          | 44.8897737954573 | 46.1513019317765 | 51.4349390827895 | 38.4540849632254 |
|          | 46.0106098064475 | 38.0078357808393 | 42.0750889188255 | 39.8497227447888 |
| FGFR3    | 111.186223357396 | 2146.1548633579  | 3941.3269626913  | 87.2643859655159 |
|          | 1009.47177197543 | 170.829628173552 | 347.003621791919 | 143.278668481091 |
|          | 1704.0522304387  | 1455.64106630257 | 634.782261466407 | 574.847203528544 |
| FGFR4    | 46.3390850717989 | 41.159706131351  | 41.5562673496867 | 41.4812544772644 |
|          | 63.1443731864055 | 43.006072841282  | 49.6078549993388 | 53.0338164320907 |
|          | 42.6679886757687 | 46.3838120599769 | 57.8405769800773 | 42.8864415494484 |
| FGFRL1   | 78.1952428431942 | 72.7213787264217 | 68.1209771323232 |                  |
|          | 63.0153175111747 | 108.700838142885 | 65.8703820581684 | 111.874193363836 |
|          | 72.7596094170237 | 82.0237575809051 | 97.2004257862686 | 80.2381651206227 |
|          | 93.955760127914  |                  |                  |                  |
| FGG      | 117.699959435983 | 41.5061991514748 | 36.1301597296871 | 36.6046828105314 |
|          | 39.5111866657136 | 39.167836466228  | 37.9905182666856 | 39.8048943625718 |
|          | 36.9565987097341 | 39.2010256871265 | 41.863927676552  | 40.4220196471124 |
| FGL1     | 43.4173515108896 | 42.9838432714922 | 41.3667878979108 | 40.8211872708071 |
|          | 38.9919142475596 | 41.5195355066893 | 42.0016830644258 | 42.0847226073592 |
|          | 42.2331334096358 | 42.3413611855132 | 40.7792705767601 | 39.3016855924751 |
| FGL2     | 96.8783070574131 | 210.5650813431   | 105.965906809429 | 632.019639546131 |
|          | 86.2836002982515 | 1178.52115916913 | 133.720493104769 | 140.853812988562 |
|          | 43.4656637536244 | 349.096725048776 | 230.73977644867  | 147.689479458785 |
| FGR      | 87.9098670472958 | 93.0714382925187 | 113.929486370331 | 1032.44965920118 |
|          | 71.6354627933716 | 137.605565493336 | 145.073599404007 | 66.7530718914083 |
|          | 106.486195938039 | 81.4881766238989 | 76.2738693944687 | 100.465129764507 |
| FH       | 331.306005726359 | 329.120125961774 | 340.962490240304 | 308.393270347486 |
|          | 387.311743342483 | 358.194667053419 | 481.492404948275 | 626.570239685127 |
|          | 396.63268714181  | 343.677907141241 | 360.668308246913 | 334.349204174886 |
| FHDC1    | 53.2046867327331 | 79.9567256807679 | 62.4683876804812 | 55.8709511400674 |
|          | 66.4047895961325 | 63.6894484284172 | 84.3526980051279 | 85.0308877626746 |
|          | 69.5741225986433 | 67.8233625051884 | 52.6960621424156 | 73.0333258448698 |
| FHIT     | 39.3709357615493 | 46.3635803515159 | 53.1491634301682 | 43.8002456102021 |
|          | 51.0107745412152 | 43.6670755115848 | 45.223075311113  | 34.3865306339645 |
|          | 47.4699236780425 | 44.6918600441328 | 45.9104478407175 | 48.1627097465883 |
| FHL1     | 72.8120269375546 | 64.0096843640535 | 51.4308501933893 | 59.987045425047  |
|          | 54.9249759425252 | 1061.61186520958 | 40.4359177791566 | 63.7002949745101 |
|          | 86.2563919366781 | 488.908231529696 | 635.906934423716 | 653.880422442079 |
| FHL2     | 851.108027634251 | 964.268294825556 | 708.839262759372 | 229.379918828848 |
|          | 644.733901442573 | 292.86576686019  | 381.480149599459 | 560.413725186282 |
|          | 693.056793637199 | 523.25106120389  | 583.053232396803 | 717.997180920384 |
| FHL3     | 240.476103976894 | 102.490465676619 | 136.657213529097 | 137.677598837555 |
|          | 143.084029849218 | 287.363928615517 | 99.7529382840954 | 95.8297699573536 |
|          | 137.197328985851 | 169.18132209076  | 190.375732394043 | 130.121040883877 |
| FHL5     | 47.6397712007919 | 46.9919960628953 | 51.9885249508283 | 40.7481155008596 |
|          | 40.148780650831  | 68.4323624797175 | 42.629412460409  | 39.4710743516517 |
|          | 43.5669306063196 | 46.2286164776607 | 44.2142581488029 | 46.7182294568603 |



|         |                  |                  |                  |                  |
|---------|------------------|------------------|------------------|------------------|
| FHOD1   | 415.759723627205 | 103.707931766117 | 177.067668324062 | 193.327267186222 |
|         | 90.9521112485099 | 91.7437837246405 | 64.4736987797413 | 157.856158440506 |
|         | 111.845105854608 | 112.375316615894 | 108.407179111715 | 129.538159906075 |
| FHOD3   | 115.691017747672 | 123.039116845742 | 99.8231023149756 | 63.4531374125233 |
|         | 52.0583273941813 | 188.912691033518 | 87.8746766762445 | 65.3019328668633 |
|         | 87.036020750455  | 183.057478637596 | 103.607345835114 | 149.812291220906 |
| FIBCD1  | 135.106756607914 | 44.7829632472754 | 50.8303921211581 |                  |
|         | 54.8412943008635 | 41.5668884168669 | 51.8103411703261 | 47.7390230243778 |
|         | 47.4740726032707 | 50.0526763693329 | 43.1839109702714 | 44.3763859390287 |
|         | 51.7833333848627 |                  |                  |                  |
| FIBIN   | 56.6951078698291 | 42.7775752471711 | 41.8751578329365 | 38.9534635879195 |
|         | 38.6454098044474 | 52.2089306840125 | 44.2166118829877 | 42.2577689927563 |
|         | 38.4344387289956 | 46.8954576545929 | 47.7535797917441 | 43.3744503319109 |
| FIBP    | 197.923403667051 | 199.208033538936 | 239.117228656704 | 208.023488988931 |
|         | 273.231509963261 | 174.752830194939 | 411.431488342465 | 334.527003257901 |
|         | 244.560715635796 | 200.401133392259 | 194.951677338012 | 165.061411701316 |
| FICD    | 44.436995101921  | 57.8405769800773 | 51.1347974668251 | 81.382229980722  |
|         | 63.955655956484  | 61.3620062177524 | 70.2635892414678 | 46.0633179231318 |
|         | 56.3441077510744 | 44.0409178714232 | 56.233217375698  | 71.5836731059913 |
| FIG4    | 102.25509551881  | 179.09303345382  | 153.364107550338 | 152.545682001987 |
|         | 80.7321212028516 | 136.250317107253 | 144.37233706688  | 471.734457300752 |
|         | 91.0346886951891 | 169.18132209076  | 142.417106615034 | 135.718484174661 |
| FIGF    | 41.6354649482853 | 39.6123051184545 | 37.5597671487621 | 42.357910063876  |
|         | 43.004943518025  | 62.3497263884167 | 38.2933870238743 | 37.2237132058632 |
|         | 40.2274522635576 | 42.785429206422  | 34.7308008643142 | 44.3521099857368 |
| FIGLA   | 39.5676051939342 | 43.1805016690297 | 39.3709357615493 | 53.2046867327331 |
|         | 39.3667161654772 | 39.2248354955045 | 42.7431359850339 | 38.079222289614  |
|         | 43.1805016690297 | 36.1550293353654 | 36.6298807161755 | 34.1509644696334 |
| FIGN    | 40.4639532172338 | 51.8610060995363 | 43.1931731665131 | 43.3078542962968 |
|         | 46.6397391251762 | 52.6226745117396 | 50.3519150282938 | 55.3122077514658 |
|         | 41.7627910693483 | 42.2614524730856 | 46.3370338074996 | 42.1537476443423 |
| FIGNL1  | 57.2960245538881 | 62.3524254253348 | 55.6865353018811 |                  |
|         | 46.8249967544573 | 93.7924763988692 | 65.0774755750423 | 75.7342400123505 |
|         | 57.2878071731043 | 67.7344875174123 | 51.3351387089044 | 49.9791966667317 |
|         | 48.6447083765118 |                  |                  |                  |
| FILIP1  | 59.1311136551108 | 46.4385386401326 | 56.939860285007  |                  |
|         | 58.0218262176065 | 60.0736861987141 | 350.451704069255 | 46.4388841354122 |
|         | 52.3068458655445 | 61.1560835966725 | 105.598516887691 | 161.439879456216 |
|         | 129.091447141381 |                  |                  |                  |
| FILIP1L | 363.67768546508  | 141.960773054307 | 124.691222601355 |                  |
|         | 201.875082892488 | 123.918925337643 | 501.585246203512 | 53.6294062560285 |
|         | 109.922909644299 | 55.898892031444  | 146.955326324436 | 158.071355628454 |
|         | 431.168903637888 |                  |                  |                  |
| FIP1L1  | 81.9258201510475 | 81.0331497830643 | 86.6186787663248 |                  |
|         | 96.1596075221747 | 114.972374827795 | 86.8691342571214 | 79.9971782971285 |
|         | 101.156215957297 | 103.869437847206 | 71.334759229964  | 89.4747568145717 |
|         | 104.305801811472 |                  |                  |                  |
| FIS     | 44.9896851005259 | 45.8669209716694 | 44.6032218589199 | 46.3203995372658 |
|         | 39.4693871570028 | 47.2009420656854 | 41.253645578517  | 46.5717043290731 |
|         | 49.1940901905636 | 44.6918600441328 | 48.042366934301  | 45.0035308952466 |
| FIS1    | 395.298033031033 | 328.176884082116 | 339.262360833465 | 408.353336724969 |
|         | 281.906398109158 | 680.279119780451 | 272.663785805238 | 294.296266023705 |
|         | 382.425576479893 | 607.431621448599 | 640.78586776574  | 498.608204176238 |

FIT1 41.0608773166058 49.1283590719461 44.8872784170036 64.3746985855249  
43.3332476888305 44.8872784170036 45.4799270968969 40.1474543172332  
48.0163377492228 45.7911932481722 45.2265319826548 33.8196020406676  
FIZ1 67.6767845246581 72.4325984501758 70.0059240383657 53.593974682612  
80.7321212028516 78.6402083787251 72.0568616357755 77.7615826856723  
94.4421289055611 97.6023731094756 96.981661155293 71.381069076765  
FJX1 62.8635815439291 115.221134337342 186.866378606003 66.224559122062  
166.652850759559 55.6242009731278 63.2726414544553 66.1288889125299  
42.5406888281114 86.2118355769367 81.6472320169489 98.0307965290686  
FKBP10 57.2008272301399 43.8495248991589 41.2365089689635  
56.6458456890715 66.1650385535549 51.4931742685391 39.0458123429605  
40.3357777530419 32.039934894666 47.611018474151 44.2925355984056  
42.57175366709  
FKBP11 308.231730523135 479.079946537291 550.642253702646  
1370.76188322111 451.13133250897 190.161505611036 194.278792348966  
223.669853276931 275.061444728555 187.430528830941 162.721587349434  
162.143245260314  
FKBP14 699.488969175268 536.290060852815 482.79099112085  
597.191426276771 380.736562250846 316.185342210304 480.660242705293  
979.468753716758 368.660803187338 904.487756674518 1001.99175009124  
728.679189702033  
FKBP15 98.0307965290686 86.3374157614394 68.3234331335073  
192.41551362197 70.7760293129408 71.7585486695516 91.3607028449916  
77.118454956956 90.7037473522607 93.6787442149817 94.5716601751149  
77.4769634299218  
FKBP1A 266.985013788569 345.876877384089 407.564154455615  
370.917477324773 569.511773053233 329.437593022939 380.736562250846  
267.608189207303 189.542991004953 223.911125639211 254.756894822368  
317.245171206724  
FKBP1B 39.9697332660833 41.9894412416874 45.5883690965192  
37.9875302985336 45.3675390992851 44.7804080899431 62.3556396662215  
44.0390019242862 39.2809305246091 49.9493230064613 48.2050207071554  
48.0350549043063  
FKBP2 81.2136969156029 125.835967514239 137.294289316915 164.176142753482  
154.355197155161 120.881290860109 168.503424269691 92.5903918620825  
118.587373377593 88.5907320965949 132.760054781304 122.331946672266  
FKBP3 95.042308285667 88.5706300816555 100.708709225818 80.1809075683154  
89.7661004674344 83.0554837248934 75.7969486011633 111.573111498905  
109.241121384212 77.2979451706651 78.8595005348182 106.878946016737  
FKBP4 139.999709303614 168.869258524932 159.268245287939 101.708164294697  
189.137593177772 127.701556328274 232.048938339214 167.943170737481  
264.924262411772 164.097531361519 137.555275829874 173.694418385132  
FKBP5 84.8139090643412 98.2747494745452 237.754990288051 722.514380928291  
144.976378707447 485.871284967735 102.626604917608 78.8250642061439  
49.2879849674517 140.276520383146 213.768352764473 187.711309781257  
FKBP6 44.1294459089314 47.1332119496722 42.157627240486 43.3078542962968  
42.7982502551634 42.0574848021044 35.4623691645629 39.853866204927  
43.8482802038826 39.3698811593364 44.553780984244 40.4639532172338  
FKBP7 46.3390850717989 42.9020321355927 43.2721716572958 40.5484717678957  
42.1386542162789 55.8938720883203 43.1602899171656 42.6022652963326  
43.0930293831497 46.0119912782855 40.3180310664156 46.0106098064475  
FKBP8 52.8427643366617 48.7084357480922 48.6037684272115 52.8502823653368  
46.3150221024046 61.4944752562671 60.2399886747451 50.9933795450314  
54.0192060888782 63.0119737420787 60.2867996701867 51.138877923954

|        |                  |                  |                  |                  |
|--------|------------------|------------------|------------------|------------------|
| FKBP9  | 42.2455707947223 | 39.6493706695391 | 43.7630587657205 | 43.074472921841  |
|        | 46.1804647841331 | 46.3715909653832 | 45.7452456977857 | 39.8965727231863 |
|        | 44.619512785899  | 41.8613406887824 | 40.3180310664156 | 40.716553247236  |
| FKBP9L | 303.458085392002 | 230.286815921497 | 229.792906003602 |                  |
|        | 173.780433758335 | 196.465477936749 | 274.259417498569 | 133.798096986107 |
|        | 189.245501343165 | 222.336600180634 | 246.869486382264 | 235.222472959869 |
|        | 206.41879845205  |                  |                  |                  |
| FKBPL  | 96.2248868829355 | 49.2934904960601 | 56.939860285007  | 42.9358255168086 |
|        | 95.1131101630937 | 48.6621527194963 | 86.3237770387663 | 62.8885806455128 |
|        | 74.4365426051588 | 56.8201201798712 | 52.3187919317561 | 49.0655215909632 |
| FKRP   | 84.4443931765378 | 65.2702686717535 | 67.8452645288969 | 62.5106969730855 |
|        | 95.2833228196616 | 74.7669841575348 | 64.7023558190673 | 70.18107651423   |
|        | 69.1129431075514 | 68.9115937148858 | 73.7060605978536 | 63.7744603935682 |
| FKSG2  | 44.3355304829989 | 42.0709558258414 | 41.0356368374708 | 41.1886975241176 |
|        | 43.3332476888305 | 45.0882356578404 | 43.9450023643394 | 43.1567024035183 |
|        | 40.3316153483289 | 44.0409178714232 | 38.6662194645633 | 42.57175366709   |
| FKSG24 | 57.4376528157926 | 52.5868047927666 | 59.5444359507702 |                  |
|        | 54.1240583139871 | 101.156215957297 | 57.013135787334  | 54.8074655158941 |
|        | 53.1052228246467 | 64.7116910405493 | 60.2877434874622 | 54.5711704180349 |
|        | 37.1747156131306 |                  |                  |                  |
| FKSG30 | 579.482255191456 | 668.961646543849 | 646.013007560085 |                  |
|        | 837.959914510114 | 487.749060801066 | 744.421618408497 | 331.591589534469 |
|        | 368.727384734032 | 489.622327794168 | 273.170084535508 | 353.751797948675 |
|        | 709.730555484551 |                  |                  |                  |
| FKSG44 | 43.0930293831497 | 41.2598458726002 | 44.9758339877851 |                  |
|        | 42.9358255168086 | 39.7568367479301 | 49.1013967533186 | 42.2577689927563 |
|        | 34.9580369221164 | 46.7760357462635 | 51.9547984751408 | 42.4580504587581 |
|        | 45.2783024981315 |                  |                  |                  |
| FKSG49 | 41.9407041937973 | 33.8237407699472 | 38.4043916290561 |                  |
|        | 38.0958223740111 | 33.5412189543102 | 38.7340969861754 | 37.6036146841933 |
|        | 37.9837233601316 | 44.4395580493118 | 41.5435611403119 | 46.0095710163378 |
|        | 42.357910063876  |                  |                  |                  |
| FKSG83 | 38.6454098044474 | 44.0409178714232 | 50.0748292497578 |                  |
|        | 45.4634652319753 | 49.7235523248653 | 41.9543948167375 | 46.3057385979341 |
|        | 54.8412943008635 | 48.0163377492228 | 47.2299678280724 | 41.2598458726002 |
|        | 47.7962548556026 |                  |                  |                  |
| FKTN   | 2357.96534075689 | 1089.08276262641 | 1280.77934331703 | 1829.30985071028 |
|        | 1161.71671016964 | 825.558929673308 | 1698.18614771363 | 2911.10227993347 |
|        | 1103.90449800536 | 2689.80835574654 | 2551.57660786358 | 1925.20977162704 |
| FLAD1  | 229.971492699272 | 183.336550845401 | 252.775631043952 | 121.668011907792 |
|        | 339.854688605186 | 135.169625016001 | 236.440703574276 | 247.193935816149 |
|        | 190.099949303905 | 142.192315159235 | 124.112216491975 | 118.966448789057 |
| FLCN   | 46.2265798401055 | 45.7538339834602 | 43.5710871617107 | 53.1341332984713 |
|        | 45.8669209716694 | 44.0299389687796 | 45.9635923776719 | 45.7106033460585 |
|        | 48.2123120250343 | 42.8496759570945 | 43.8002456102021 | 45.1296099011771 |
| FLG    | 43.5710871617107 | 46.3635803515159 | 36.1042012504758 | 36.4564050256915 |
|        | 42.1650127805175 | 41.8613406887824 | 37.0564573649223 | 37.86982638952   |
|        | 42.4540072551568 | 37.4302011516587 | 34.9428206949566 | 38.8495095797881 |
| FLG2   | 43.7164681443605 | 40.4772513262052 | 39.0470836345045 | 37.0273924363983 |
|        | 43.0723817756832 | 40.3946758935842 | 41.253645578517  | 39.5466975353131 |
|        | 40.4220196471124 | 40.7620472083159 | 41.0050831223107 | 38.6454098044474 |
| FLI1   | 33.5994525227062 | 39.0894172982439 | 42.5406888281114 | 44.550322123994  |
|        | 39.859345745831  | 39.9397419279057 | 36.08956004634   | 36.2539950294089 |
|        | 43.9450023643394 | 37.3179578037963 | 29.0303154053123 | 49.4786466722535 |

FLII 165.606015336587 334.016152807947 353.076989769287 297.701126167694  
215.131274710043 331.001195453225 277.014526407597 176.057220407246  
204.992039590717 302.083293019113 330.241189572237 200.790001763897  
FLJ00312 38.0709016691086 42.5564081946232 42.108130037421  
40.4831048079412 42.8596678196469 38.2293008890613 40.2601451506332  
41.6799375298398 41.0476065156912 40.4136535208406 39.9586075662602  
39.1553169409075  
FLJ10081 246.274692971423 189.111092737256 156.433762355183  
187.802182308625 194.896610327943 247.416016413788 151.795609904857  
232.113067048781 234.615033303459 358.879599295105 312.154320305976  
280.117410663595  
FLJ10120 46.441301934328 46.7591817286632 44.2405728317107  
41.6564075217517 41.5668884168669 47.3791873993182 42.4939802311136  
54.0507720792049 48.8067321016961 53.5498255316009 49.7363778831003  
51.0013344286851  
FLJ10213 95.1513370156467 68.0388928513985 112.727277807495  
122.024487499513 84.4230484528318 67.9306669919176 105.666698877424  
86.5926014007562 99.3797043236938 135.973016473297 119.434418653131  
99.3344676796884  
FLJ10246 52.8427643366617 60.9755936952178 54.2670850492947  
58.3475983630509 73.5541045639348 52.0299937917925 72.5956443098684  
79.1039287828151 53.7442594289333 53.8260140375214 62.358854072801  
60.0940570991178  
FLJ10324 40.5235471987417 41.8848959280916 47.6040671292013  
40.2455972565968 45.9104478407175 56.796621176582 43.0269218496197  
50.1833483241864 40.4518431978241 46.0119912782855 47.1970991228159  
46.0633179231318  
FLJ10357 54.2648201582657 45.1694246393676 47.2055133646385  
62.1776700757427 46.5557478175976 49.3172204533818 38.7337086062875  
42.5435283762933 41.7627910693483 55.6069214673486 50.0808824383821  
53.3904307221902  
FLJ10374 41.8409927585705 53.7332797903102 46.9040704638073  
44.4367387274922 49.7235523248653 40.9506062495231 54.0170817319522  
36.6452480995946 57.5883027758003 47.0055981216687 45.9104478407175  
49.904979214379  
FLJ10404 51.9380636897023 48.3077814647455 50.3452972893313  
40.8084239472012 50.2953638261991 48.8744644207821 43.8835874380262  
51.4360013601805 48.3119523820103 52.2256177934134 54.5222652584532  
48.0350549043063  
FLJ10490 46.0920218698606 46.9919960628953 51.223859150798  
51.7739270955254 55.4919197421746 41.8613406887824 57.4047331041592  
45.7476095696859 41.2870505273664 44.8997235283254 44.2142581488029  
42.1537476443423  
FLJ10781 36.3649677956953 42.5269793679335 38.3166554965434  
37.4223289687135 50.5110359971301 52.6226745117396 41.706879587091  
62.4219686957673 33.3643994200057 39.9948390976317 55.6151308605445  
38.5279745308203  
FLJ10803 47.1962846565261 47.9128504683618 43.401782064778  
41.8778873678551 46.5557478175976 48.7781962164988 45.4799270968969  
62.105802634526 53.5677764726461 42.1622837416589 49.7363778831003  
47.2131144508464  
FLJ10916 235.127539195661 74.9956591643367 161.268186656743  
54.6089451252049 146.405413944753 210.22828395255 113.692418102755

160.917024416961 67.9176876913772 373.330920144642 366.326747630465  
150.242221910229  
FLJ10986 137.696331574552 120.465621774337 203.82788889213  
117.228320608065 141.410183156424 133.365282773876 258.079468517805  
205.154378853199 365.792144095604 297.990925644625 285.390768830888  
218.013913036142  
FLJ10996 44.8914371498528 43.2649781354792 41.2365089689635  
56.6458456890715 44.6834648302383 44.1737502492846 48.4859552186772  
49.085741080241 51.5888395924843 40.3235655331796 46.0095710163378  
45.0985088502363  
FLJ11151 37.0320432433314 46.3635803515159 48.2883694323339  
51.949834638817 44.7829632472754 45.3882138838137 47.8947595316832  
46.8954576545929 43.6670755115848 41.1222709786153 42.2618615571566  
50.4847465816184  
FLJ11235 72.8120269375546 59.1938299291358 76.2533853403813  
53.2046867327331 51.2525124735102 61.4944752562671 83.6935756500468  
68.1311562787361 73.967017874248 77.775644509079 74.280612516205  
71.7408778060956  
FLJ11292 44.7915315085948 49.0697565324841 45.6989664108554  
47.6687908290818 43.6587492470348 45.7300501624017 42.8684958525042  
46.1673159982664 49.0986627051784 48.3693338695392 45.7328341667151  
47.1060577218993  
FLJ11783 43.5710871617107 43.1805016690297 43.0016969050339  
38.2041059863839 44.9936360641969 43.1826328292558 47.1345949868029  
59.8760452220989 37.10170285405 65.6721629145797 52.5154971256566  
46.2625470410195  
FLJ11795 41.7397731376692 46.4861258030402 42.640829914102  
43.074472921841 47.4548471240051 43.0860383229288 44.0687697278114  
48.4670130605028 40.2274522635576 40.3235655331796 44.1148826235374  
46.0633179231318  
FLJ12078 48.1952521496489 45.4882438975269 53.9612654850046  
73.7124988616836 39.1650142708257 45.0882356578404 39.0458123429605  
51.3472428383325 51.9545473262296 124.986782737446 82.8205269728224  
83.1874704625702  
FLJ12331 38.8561375693335 42.3550738181144 42.8270038153139  
44.9370339275041 42.6022652963326 39.2985791324641 33.3231576795423  
36.43924066428 37.9273653326866 37.1275334308172 39.8184668132023  
44.9070250604284  
FLJ12334 40.4639532172338 48.3699741879723 40.7620472083159  
48.309866878365 51.1368583672022 41.7627910693483 40.3302268293707  
42.2577689927563 42.2577689927563 40.5090849993014 37.4642807402741  
41.9430737035925  
FLJ12355 51.6558970571712 49.6841415268611 52.5353664902258  
36.3604951341921 54.4586176399381 48.4758590019384 80.7563265626648  
75.5830548489892 81.8983491901699 58.3813211109331 59.501103909345  
49.3984571719129  
FLJ12529 44.3355304829989 43.7644428186265 36.0306975524309  
48.309866878365 48.0234896130991 46.4648868771662 35.6056062164318  
44.9977782988116 39.7537274655115 44.8997235283254 44.1148826235374  
45.8546719310325  
FLJ12684 33.1666036387511 59.9682734755814 84.5998418020787  
43.8002456102021 84.6563174894574 43.1826328292558 79.7564155881026  
98.4405692451144 74.5694657001572 48.9826868640753 49.0361180089431  
54.3587260982091

FLJ12688 42.7150227340364 45.9266745571724 53.4743535852344  
55.4180794172794 53.1884505015411 48.5835484742456 46.7100796279384  
40.2382908228517 55.4030910454028 38.957687788868 48.8088340735921  
44.5432192783161  
FLJ12949 85.1950626054282 93.8968899420039 89.5597629049747  
86.1703662107384 130.515102593803 77.0226403968683 105.945216149549  
131.258204302177 121.84142967836 110.09868737254 116.388069891158  
91.1363393944977  
FLJ12993 44.7044140979108 48.2220547806679 50.6987358483181  
38.6414316877471 47.5647821785529 50.9724155054821 44.7255207589606  
43.9366081640576 50.6750785584772 46.8954576545929 46.3370338074996  
50.7487159427973  
FLJ13224 43.515290338756 44.7829632472754 43.4709415392696  
40.3180310664156 42.6022652963326 38.9378717994178 41.7614975630362  
44.1642484298135 40.7847110517594 47.7800121097582 39.8577530602176  
45.7979032939211  
FLJ13305 51.0225132036905 46.29198852834 52.7005092555102  
46.614092935749 53.8260140375214 54.1440452292081 63.1604223919703  
51.8347877274018 47.6195009345747 50.3388505346542 48.5292718280498  
47.6040671292013  
FLJ13611 39.4710743516517 40.716553247236 41.0356368374708  
48.665578118898 39.9697332660833 43.9724628401189 51.3064929551674  
42.357910063876 41.2870505273664 44.0409178714232 40.9157352260901  
42.7782216342806  
FLJ13614 37.9387791625384 39.9697332660833 35.8265993915844  
38.745552403895 38.8456942580061 41.159706131351 38.5066108855005  
43.3262148375525 43.0930293831497 38.957687788868 43.5710871617107  
42.57175366709  
FLJ14082 46.6348258763289 44.6918600441328 49.8344973836834  
41.5464765641928 44.7829632472754 39.9397419279057 47.5963750520409  
52.7787010032051 54.7033747046992 54.1683282066029 51.524711857679  
41.9430737035925  
FLJ14107 49.9419897484381 49.2934904960601 53.4743535852344  
42.357910063876 40.2449343247539 49.7458652239071 48.8319884367456  
43.5544347011646 49.1940901905636 54.7827221235949 60.394307846869  
59.0894921452893  
FLJ14166 72.3388488936832 44.9370339275041 51.0539624358342  
49.3654837541353 57.5040500497076 37.5887129572848 63.5738862549306  
45.9604707098953 43.1805016690297 47.8207974930031 45.8180710486329  
51.4968903591058  
FLJ14186 48.2910530887214 45.0905928998779 43.5710871617107  
43.9282059368202 45.2556760873335 52.3187919317561 44.2166118829877  
44.9977782988116 44.2607789091176 41.4397539024976 45.9104478407175  
45.1735152121056  
FLJ14213 70.5096706089299 51.0175677516029 48.7039705048129  
107.337113678019 50.0580547772867 52.7156971154405 43.1931731665131  
54.0507720792049 42.1594905198929 96.5102825310977 97.3188285021124  
93.955760127914  
FLJ14712 54.1745577382276 42.6022652963326 44.9758339877851  
44.6905691366696 80.3500323413132 42.2577689927563 42.4939802311136  
39.7509165247419 56.432280646473 43.0919221375514 40.2649309204478  
44.5432192783161  
FLJ14816 43.0001432913058 35.7393138893354 41.2365089689635  
42.4580504587581 40.8873907150245 37.0180934800573 40.7910160811527

43.5544347011646 40.7847110517594 38.3092241935352 36.43924066428  
39.6352613956998  
FLJ16124 41.6354649482853 42.0709558258414 43.7630587657205  
37.0732977341185 36.9060997041453 39.132725377815 47.5963750520409  
43.844855336215 51.7549258776884 43.844855336215 36.2435874904689  
40.9683275553869  
FLJ16165 34.5886782974123 40.7952353240579 45.5883690965192  
39.1706564265495 37.7576900881741 41.0582900711341 54.8074655158941  
48.4670130605028 42.5406888281114 36.3612409063792 40.3452320167286  
37.1747156131306  
FLJ16171 38.957687788868 41.9894412416874 41.8751578329365  
38.3166554965434 39.4693871570028 43.3785777889265 40.6750540874299  
39.0620487644635 40.8970401536578 43.6033221838149 42.170702295259  
43.0930293831497  
FLJ16323 48.2910530887214 46.29198852834 42.640829914102  
45.5869891570251 44.6834648302383 46.4648868771662 42.7431359850339  
42.0494116081998 44.0519245668737 45.5776159432079 42.170702295259  
46.3411353377615  
FLJ16331 37.4554876386402 48.4980626712175 41.1367478979484  
48.4916117779992 50.6470461863549 54.0382756991549 48.0283573444179  
41.8417024632349 35.5220586859301 36.8059561571675 42.4580504587581  
43.1805016690297  
FLJ16369 35.8208542506595 41.2598458726002 40.301483914446  
40.7481155008596 34.806104801006 44.6524308640784 42.629412460409  
34.806104801006 43.5669306063196 38.2069499294002 39.2542963855807  
38.3291713594599  
FLJ16686 43.4626049853157 44.5884811528117 41.437237454134  
44.265834798964 45.9104478407175 40.5281496800812 42.2577689927563  
43.9366081640576 42.2577689927563 47.2299678280724 45.7328341667151  
44.4475838947656  
FLJ16734 58.7404123614695 46.29198852834 49.3780606970538  
59.987045425047 47.6884372645373 47.7556758818053 54.0170817319522  
48.3590401011623 46.7760357462635 96.1044453515408 79.7020636215451  
58.2879293130296  
FLJ16793 42.1537476443423 45.4143854024453 44.696023817801  
38.8495095797881 54.4586176399381 51.9421032049606 67.6767845246581  
61.8665316900291 56.1172088979505 43.844855336215 49.1067959632109  
39.8497227447888  
FLJ20021 101.351907645804 67.0402749076279 85.4536891882639  
112.743602566917 85.7842344710572 109.221269056557 120.721482177994  
69.4677195088043 108.503081044355 128.436305192918 124.350816245276  
97.5534379346899  
FLJ20125 54.691568065544 54.2924642952939 55.2141529491512  
54.1240583139871 42.7107928951766 67.4846787600629 52.8496345990125  
46.1673159982664 60.3977304934451 50.6486940895674 55.3147456054175  
62.0967404944031  
FLJ20160 169.301010687893 287.565588186962 257.194689822426  
140.894046694804 133.765486891316 132.059215102854 141.830305704504  
314.281125546552 181.340089705052 187.430528830941 237.161912299581  
276.267583952979  
FLJ20184 35.2267149016596 34.9262464079777 31.0126568324233  
46.0228732507872 42.7982502551634 36.2768299545794 36.8369172900902  
36.3405039629059 31.2688290305385 42.1622837416589 37.7384958256497  
37.4554876386402

FLJ20209 45.4799270968969 43.5873188565519 49.6347864008749  
43.9282059368202 47.9128504683618 40.3357777530419 44.4639405506967  
44.797320243931 46.8873421271259 55.0016608333828 43.844855336215  
39.3575468494941  
FLJ20254 145.073599404007 81.7367617812869 75.561262816077  
105.934378627264 84.8751572193902 87.8967913380047 89.4747568145717  
121.172652675767 87.6726059613969 95.4072431786073 133.067727272864  
84.4349803529132  
FLJ20273 69.3418521417182 107.836867810972 72.0243286940589  
178.379117285008 75.6471706262645 55.7197525213035 99.9896394343368  
186.161177110898 103.139459009593 71.0619469948187 85.8277891453447  
113.716666562787  
FLJ20297 43.5710871617107 37.1685072112618 41.2365089689635  
45.1944222548351 38.745552403895 33.7818132446042 33.5578650644246  
42.7431359850339 42.992884918158 42.9866214102525 38.745552403895  
42.57175366709  
FLJ20309 41.3387790895716 44.5884811528117 43.5710871617107  
43.1847628331565 44.5668141895992 41.2567470068038 52.8496345990125  
41.8417024632349 43.3744503319109 46.6598879466655 45.9104478407175  
48.6795178347248  
FLJ20323 131.083141370546 99.4123924179498 80.257554904218  
125.676172266736 151.724932189601 116.35075921851 115.087963545095  
131.67159377585 138.50445813694 134.051011731533 121.831344781285  
128.365609268093  
FLJ20397 41.6354649482853 44.2460658853547 42.377095964597  
40.4826391343033 44.5668141895992 41.2226607554583 42.8027734291654  
38.6964057457624 44.0183974528298 40.4455351423846 42.3375909167899  
43.2776458914333  
FLJ20433 55.3153799233744 48.5905518770847 55.8810837854139  
36.9912468186322 43.3332476888305 56.2736599756843 45.8980298854198  
58.8022152133979 37.3600014814388 75.0665411373616 88.3725577276628  
80.6200293361016  
FLJ20444 57.0006212637829 66.0147097736612 56.2181240696479  
49.1786207920603 68.8570376191283 52.3579564953125 68.9603421415748  
59.526516100518 49.8512010216731 126.115065200084 72.3822545261582  
59.0216019867146  
FLJ20464 42.1537476443423 43.5182502375207 36.769073068743  
37.651298468202 40.0599807618105 35.6125439901743 38.7337086062875  
40.6171774724171 41.4636047919453 41.0057887014368 37.7384958256497  
40.9683275553869  
FLJ20489 74.2151462073098 95.7639712596394 96.2739664178142  
80.1809075683154 79.7808217577226 121.120217132666 67.5206810636627  
113.064858029749 113.546568515215 154.355197155161 146.892027926888  
118.288549974348  
FLJ20581 40.308802735799 43.5182502375207 39.1480645318984  
40.646702696033 45.1137938810047 43.4681646416585 38.941855825269  
41.5934628038429 40.6957787921451 38.9207612933107 42.9634662926872  
42.8864415494484  
FLJ20628 67.0577715520007 74.9956591643367 63.2475738480323  
53.0284011078097 99.8699868526053 66.4015820814547 94.6952414258466  
106.78552222475 69.3300058073438 60.7495043977707 61.0979269700412  
75.7991766454243  
FLJ20674 49.4786466722535 65.7457567201236 57.2107492415265  
41.6045220683604 65.8319449883221 45.4882438975269 51.3064929551674



63.0748373122119 54.9426456410692 56.1912096308988 53.0177144132449  
65.4435809676217  
FLJ20699 118.05982513603 119.434418653131 115.256208610595  
121.104663867264 144.799432299339 114.643475335002 99.5844079573552  
124.76401857899 132.369828264246 193.703214707909 182.37433006793  
116.374125502825  
FLJ20712 40.6559419616644 42.1607322031054 41.8751578329365  
41.8778873678551 36.2048942610546 41.8613406887824 37.1643693306382  
39.0620487644635 42.992884918158 41.1222709786153 47.2134341420411  
34.6720534245631  
FLJ20718 132.604567913122 128.70380102034 109.696102117537  
154.718907273467 100.489477730896 106.186051982612 111.025105784166  
105.1770711426 141.180682718758 93.3897477314201 113.169111095305  
108.082240435027  
FLJ20850 41.8409927585705 48.109747794187 40.8420925848403  
43.074472921841 46.6397391251762 42.357910063876 42.2577689927563  
39.853866204927 52.7512110769042 41.0057887014368 39.9070785037411  
44.4475838947656  
FLJ20920 52.0299937917925 84.2880616879945 92.804679821289  
55.2214187655851 136.582966744378 54.3478800757394 127.724641303  
179.07886477603 131.517202728816 232.516262874696 202.325629133577  
165.573693886454  
FLJ20972 47.0940613507321 40.9731067463382 43.0971787292711  
40.5484717678957 45.1137938810047 41.9543948167375 44.9863726205428  
39.7509165247419 50.4974478884077 46.8954576545929 46.4753015651202  
45.5800840647989  
FLJ21075 42.7150227340364 41.554942319225 42.157627240486  
41.4273122914951 46.8674366115656 40.8634043028528 46.3057385979341  
42.7431359850339 46.9739160257217 45.2556760873335 39.8184668132023  
41.4508241771315  
FLJ21438 105.05842887748 193.830224000034 195.018775118528  
330.241189572237 74.9661773375536 70.8674195845729 75.0665411373616  
114.533239859288 57.8772482723463 79.262977183608 113.612874206329  
61.5300817099814  
FLJ21511 37.2474303302343 48.0296332183129 47.9035532886869  
40.9607305725196 45.6895223823001 44.3648993568405 66.4258159334241  
101.156215957297 42.4540072551568 62.2025996860055 67.7280831060202  
58.0218262176065  
FLJ21687 40.3478825593224 44.7829632472754 44.0451487108213  
30.2675713925613 44.7829632472754 43.6670755115848 39.4600924554505  
34.8949555140527 51.2066664465185 44.571915452417 42.170702295259  
51.3244198342335  
FLJ21767 39.8662795144616 43.1805016690297 45.0115870036541  
43.8495248991589 47.8697093824642 48.829194318411 39.8695929627783  
44.6107027295193 39.3750969348308 46.5650556481721 42.7775752471711  
46.3411353377615  
FLJ21839 48.3814421939888 44.6918600441328 40.0998167098057  
41.5464765641928 43.9450023643394 40.5281496800812 37.3799542961839  
43.1567024035183 40.8970401536578 43.9450023643394 45.390192977585  
43.0930293831497  
FLJ21865 186.965367827758 251.983470875355 330.470972281607  
81.8727530460686 261.51893439249 100.883604376864 108.558977253184  
260.383969219887 136.451598654243 217.743953847269 262.735075993242  
188.767243497644

FLJ21986 72.1408243034509 73.845912534353 51.9885249508283  
132.205423909251 61.5236837309467 793.225863118464 41.9393838138203  
163.38302606725 52.9482338979681 518.936896882424 378.12777235743  
437.542517888395

FLJ22167 54.5358897781765 53.6429962450784 66.737740728688  
47.3574589211166 63.686652234709 50.2163892855092 59.3549213146532  
54.2877981508636 66.2552876795581 56.8201201798712 49.1067959632109  
55.1804535845496

FLJ22184 180.592281750722 92.0880591999243 79.2073371826617  
40.4359177791566 148.608392563633 50.2163892855092 111.558107942386  
233.850715388018 72.5346469941833 55.4037482627222 62.2025996860055  
48.6037684272115

FLJ22222 80.7462144785541 75.7140064167134 78.270329450618  
70.1597323687098 75.2923395421694 72.961444366037 106.049736669661  
55.7469393723377 101.103458852775 63.5716064500377 74.6662312145629  
72.7882384002423

FLJ22269 36.5393857306744 35.9305494063137 40.301483914446  
30.2675713925613 42.1650127805175 41.0582900711341 38.0598374201407  
37.9837233601316 39.1790517315259 34.8137085420423 38.745552403895  
35.8429598823818

FLJ22374 78.5216977073842 62.801431502597 58.5212649095879  
55.6481366056639 101.987604729928 95.5920087912438 60.7992483126292  
59.7744650739434 73.8800799416166 96.1044453515408 101.065203693106  
79.2525964926483

FLJ22447 42.8482181313226 43.1358833499227 43.9217273706293  
50.4733460479197 42.9775348174342 41.5146360101556 41.4397539024976  
43.6740007496465 42.7606905460304 43.0290260867894 43.3085358214154  
39.9519547348106

FLJ22531 41.3387790895716 42.2114134935898 39.7411455670172  
43.0016969050339 43.2484996523549 41.3094485574845 44.6032218589199  
40.6171774724171 40.1738310955128 39.4710743516517 39.8184668132023  
45.6692241948108

FLJ22639 67.9531693869426 55.8046062733709 79.4998723172096  
56.4578213622965 97.2316181542823 41.554942319225 55.8019623191927  
60.1796637353976 63.5195937348531 68.4137459386155 88.5511408870489  
67.6138276415458

FLJ22662 418.410951118141 2013.08489754172 784.951880532127  
626.570239685127 294.7772562683 567.393665550133 640.407302868904  
151.266092912661 1093.04440713629 947.656220635965 798.033975337132  
708.005870621064

FLJ22795 138.401109242778 148.144200968432 58.112348043634  
49.3654837541353 113.994256868581 58.2531879680192 132.090336898032  
156.123501229126 123.480244775709 245.853111206859 131.126942328593  
109.339287213971

FLJ23152 49.085741080241 45.4143854024453 45.2313723727673  
48.9944486068347 46.4343327861696 45.3882138838137 195.512986297442  
61.9787117490846 46.1101825640108 46.7646877499666 47.3791873993182  
52.3896785600751

FLJ23172 33.6902293666089 33.939263369489 36.178547300352  
36.0481934423077 35.1411239266238 34.9849896310235 34.4570158133896  
38.8495095797881 40.0403898620771 43.6033221838149 35.6970528713709  
36.449101775775

FLJ23356 40.7609952437622 38.0226905622357 34.1806289878747  
43.5627649099623 40.0599807618105 39.2985791324641 38.2933870238743

35.9023742468744 37.9273653326866 43.7303813515864 40.547835538778  
37.9607839934735  
FLJ23584 59.6651708873036 52.3187919317561 49.1067959632109  
51.3851157261451 64.9072331703985 71.8706847571669 58.7585623394335  
55.8087097725119 52.8502823653368 64.8549209064366 58.691436315511  
53.9431600945419  
FLJ23754 48.8333989709933 48.5905518770847 47.2962360458401  
51.5913529948887 44.8897737954573 48.5835484742456 46.1634822993009  
44.1311654985682 40.9901805728485 43.6033221838149 47.6125796208753  
48.4535991392809  
FLJ23834 39.9697332660833 38.9338521051669 40.7620472083159  
46.614092935749 46.9906120932727 43.3785777889265 40.9157352260901  
45.7476095696859 39.0775870687758 40.7063426028871 40.1742127891824  
42.357910063876  
FLJ25006 44.380620848621 62.1913948207302 72.6182747525443  
45.7397504535169 71.5345397102823 45.1873487463472 65.524821699432  
64.4156641487994 49.9162522057712 56.8201201798712 57.0690683036183  
63.2475738480323  
FLJ25037 32.0823591288671 40.5400384479766 37.6557714476853  
42.1273928203021 43.4544762830742 37.3799542961839 37.1643693306382  
36.1375121409002 34.4716904283753 53.1993028936883 40.8225507267584  
38.745552403895  
FLJ25076 43.4100411978366 38.5252456306656 41.9287023391451  
37.0732977341185 37.4470183315826 39.3841861812262 37.9430145836712  
34.3865306339645 38.6510172759977 38.528621456378 38.2293008890613  
38.7012264805355  
FLJ25169 42.2455707947223 54.8979897528792 45.310660704531  
42.2496337895968 41.6806984441849 51.0506441018166 44.8643898647322  
48.3590401011623 40.9901805728485 45.6868589181768 43.401782064778  
48.1627097465883  
FLJ25328 35.2267149016596 43.4396866157171 37.7384958256497  
37.9875302985336 42.269054475455 37.9003288112261 39.5496902678788  
44.797320243931 41.2870505273664 33.2987269789328 36.5359455830388  
38.5279745308203  
FLJ25404 47.4678477186801 42.5269793679335 45.5883690965192  
48.4916117779992 57.1935729219207 43.0860383229288 46.0228732507872  
77.523734787944 36.197424053556 43.7303813515864 45.4799270968969  
47.2131144508464  
FLJ25439 46.7293238583888 40.4359177791566 41.785676764591  
39.9697332660833 41.467005949568 43.7630587657205 40.1235656101329  
44.797320243931 38.6322728994674 48.2596564318071 41.4508241771315  
47.2131144508464  
FLJ25715 42.2455707947223 42.2577689927563 48.8100349749783  
41.6564075217517 46.0977687311222 43.8582747295766 45.1017494688414  
44.0390019242862 49.1940901905636 46.7646877499666 43.844855336215  
47.2131144508464  
FLJ25758 44.1294459089314 40.6380495994768 38.2280071951674  
46.4555908533915 45.2556760873335 39.2248354955045 40.9157352260901  
40.7311497914871 40.8970401536578 39.8873706855774 43.0016969050339  
43.2776458914333  
FLJ25770 34.4021554788966 37.3634897565502 35.2838283525874  
40.3180310664156 37.0526522140242 37.2686490268265 35.8227939208521  
39.0620487644635 37.0126425326534 34.6720534245631 36.3390947880186  
34.1509644696334

FLJ25778 44.436995101921 69.1414574152997 66.5285423077808  
57.4595416719581 46.8674366115656 56.0477607422828 78.6402083787251  
42.9301944191913 53.1249776278067 50.6486940895674 54.8532558909227  
54.4992295592001

FLJ25996 47.1962846565261 48.7084357480922 61.2153068100932  
40.8681871019812 48.0234896130991 38.4330755397458 42.629412460409  
49.9332280449549 62.9922928277769 73.3479915711031 65.6010220593397  
58.6481644777552

FLJ26056 44.2350046179299 42.6939394537076 42.2577689927563  
39.066284740632 42.9090346219023 43.2805590023412 39.6535880152834  
43.5544347011646 41.3803269429468 41.0057887014368 37.2018803984555  
39.6352613956998

FLJ26850 44.7044140979108 43.2649781354792 43.9450023643394  
41.0726336841311 31.5599106749655 40.9506062495231 41.1507980856436  
40.047314525032 38.9006788676407 36.6893251782922 44.2142581488029  
40.0557788909923

FLJ27255 44.6231541342 46.1569135229922 36.769073068743  
42.357910063876 36.5393857306744 44.3648993568405 40.5585676679482  
36.3405039629059 38.2215591930186 40.5090849993014 39.2542963855807  
47.3992733452821

FLJ27354 37.0320432433314 40.8880530359822 35.4484652445078  
44.1483976313959 45.1137938810047 39.3841861812262 42.0605906240248  
39.0620487644635 35.2143190355414 38.0078357808393 40.723990462047  
40.6614700944853

FLJ27365 53.2046867327331 65.485076402841 81.8648220673828  
42.9358255168086 47.8075998240396 48.4758590019384 39.8695929627783  
52.1788489555942 38.7298222155532 42.4594149893798 47.4630625313159  
46.5650556481721

FLJ27465 44.0707087774725 45.4757965005055 47.2505395290129  
45.8844325913247 44.9936360641969 44.0804700754786 46.6267962186599  
48.7814131120945 47.0804681460898 50.007830364606 47.2543830677329  
44.3521099857368

FLJ30058 43.2724556187214 45.1694246393676 41.9666541498638  
42.5664883002833 53.6907197364586 53.7442594289333 53.4921736109774  
40.7311497914871 56.432280646473 42.5664883002833 49.319499137678  
50.3118072462443

FLJ30092 45.3451294405285 46.4035310644846 46.7508829977587  
44.0860067869564 48.4779133727101 40.650742261428 45.1017494688414  
41.7419877611072 41.1367478979484 43.2346122959037 41.6336636285875  
43.0456011922275

FLJ30375 40.7609952437622 42.4493032770053 42.640829914102  
41.3027031037343 44.7829632472754 39.8455060654531 43.6753843488695  
38.8495095797881 43.0930293831497 42.0621425894624 43.6629145624937  
38.3291713594599

FLJ30430 41.6354649482853 41.8848959280916 42.2577689927563  
41.4273122914951 39.7568367479301 39.2248354955045 37.9430145836712  
42.4580504587581 46.8873421271259 41.9666541498638 44.7926323492519  
41.863927676552

FLJ30679 41.5421429082231 44.5884811528117 40.5734458834617  
46.614092935749 38.0598374201407 45.1873487463472 47.7390230243778  
42.5435283762933 48.3119523820103 47.0055981216687 43.3085358214154  
43.6753843488695

FLJ30719 39.9697332660833 37.10170285405 41.437237454134  
36.6501141438378 36.6354013629791 32.771863438151 32.9962272670005

35.5798430594271 36.5393857306744 34.9138625012006 37.5583886316038  
36.9976231206067  
FLJ30851 44.5798743103596 43.1464706017434 45.3974838013476  
48.4916117779992 43.844855336215 42.6575535390785 42.8036731479932  
43.6434576713809 42.0621425894624 43.6033221838149 46.1673159982664  
43.1805016690297  
FLJ31132 50.4872122867759 61.9753438182501 54.0536858212253  
52.6947911480086 68.0414563597154 43.0860383229288 65.8986841086198  
59.9968592852122 67.8208976798364 57.5713378330876 54.7883681830995  
48.4535991392809  
FLJ31222 42.8036731479932 45.7979032939211 38.0452862258803  
42.357910063876 40.4639532172338 38.7340969861754 51.5967098638347  
43.4544762830742 49.7336769474446 40.3235655331796 40.9157352260901  
42.57175366709  
FLJ31401 39.2076937845359 42.3711524005238 39.7411455670172  
36.7186180663551 41.4397539024976 41.3553369544097 41.4742337714895  
39.853866204927 39.1790517315259 43.0919221375514 35.5395819665562  
38.5921548841176  
FLJ31568 45.3872406432794 46.0023068797812 37.4642807402741  
43.6726153508978 44.4489662507893 40.3946758935842 39.2533668167483  
50.8160430472218 47.209353240759 46.8292269513767 42.2510526338368  
43.5738557773903  
FLJ31813 40.8681871019812 43.0227387991135 43.0971787292711  
46.7577982595088 41.7929491793697 46.6872654833579 44.7255207589606  
45.4757965005055 42.5406888281114 42.2614524730856 37.7384958256497  
44.1452943804044  
FLJ31945 42.0532901689036 40.3384318592985 40.0998167098057  
40.5484717678957 44.9384441371181 42.157627240486 42.629412460409  
42.7965563818112 44.1519466943185 42.8414096678708 39.0061493066838  
45.1735152121056  
FLJ32011 47.2862299990938 43.683792219729 45.5883690965192  
40.5484717678957 39.9697332660833 48.0350549043063 47.8947595316832  
43.3262148375525 46.4164127487052 44.3648993568405 46.0095710163378  
43.7672102682067  
FLJ32065 41.9407041937973 44.7829632472754 35.5220586859301  
34.5425384901279 39.9697332660833 40.9506062495231 42.0605906240248  
42.9301944191913 45.4799270968969 37.7315666632629 37.8372168909583  
39.8497227447888  
FLJ32154 37.9387791625384 32.2133093774284 37.6557714476853  
33.8111782249716 40.5710637884029 38.1169703906207 39.4600924554505  
44.5029690493211 35.1155486926999 34.8137085420423 38.956280281655  
40.8681871019812  
FLJ32214 40.7609952437622 45.7979032939211 42.3536549114165  
45.8844325913247 47.5647821785529 41.159706131351 43.4544762830742  
39.6474008369935 31.859589438824 43.2988017098387 39.9899430628542  
35.1451084093692  
FLJ32252 36.1232327599945 50.6229884142872 40.0998167098057  
40.9607305725196 45.3675390992851 37.9003288112261 39.2533668167483  
42.7431359850339 45.2897806651929 41.2276963324981 38.2795150354677  
39.6352613956998  
FLJ32255 42.1537476443423 49.9085372049438 64.5232087947596  
91.7068354379889 46.0977687311222 50.6360662655392 54.8074655158941  
44.0390019242862 47.798305839406 53.1993028936883 47.9942520395434  
43.9541718254769

FLJ32310 42.3433931248155 44.3529919625344 39.991353369336  
44.1483976313959 42.269054475455 47.9503724044453 46.9929836306816  
42.8482181313226 43.8482802038826 44.2580151149956 47.0940613507321  
45.0985088502363  
FLJ32569 42.466333667839 144.500148287951 489.622327794168  
40.4967168818294 284.241284057415 72.6182747525443 83.0647477737971  
39.853866204927 121.650910373947 46.2768056702424 64.7598303406649  
44.0246886382298  
FLJ32658 39.4710743516517 43.2649781354792 39.991353369336  
45.7397504535169 40.4639532172338 42.0574848021044 43.4544762830742  
44.797320243931 43.1805016690297 39.4710743516517 44.2925355984056  
42.9887069977696  
FLJ32679 44.436995101921 40.0952076421149 44.1070537445005  
44.6246431218094 43.0895173605825 44.3194383179647 42.1046072075724  
39.9892510336916 40.4485515631112 41.1688470149988 41.9430737035925  
41.1066323911308  
FLJ32682 41.4508241771315 37.4540772310118 42.3536549114165  
39.853175885492 38.5512429290626 43.4681646416585 40.9157352260901  
36.1375121409002 39.3750969348308 38.745552403895 44.0409178714232  
43.6753843488695  
FLJ32784 41.5421429082231 43.3972849968032 45.5883690965192  
41.3027031037343 42.7489468897708 39.5581166303303 41.7614975630362  
41.4061152929154 41.9635525160083 41.9666541498638 43.3085358214154  
40.716553247236  
FLJ32810 42.9104454767916 39.3999056968598 39.7411455670172  
44.7980740332174 42.6022652963326 40.7063426028871 46.6267962186599  
43.0390857698452 41.134180463103 43.5627649099623 39.8577530602176  
41.3481355128089  
FLJ32867 44.5282181324797 41.4508241771315 39.9101908547397  
42.0102671859606 39.1650142708257 43.4681646416585 42.357910063876  
37.7612949798895 41.3803269429468 43.2988017098387 43.9450023643394  
34.6720534245631  
FLJ32955 47.2862299990938 49.5443425465542 44.8872784170036  
50.378948785456 45.5809132232681 46.3715909653832 51.1541843174981  
45.642304356051 42.4540072551568 50.3388505346542 47.0940613507321  
44.4475838947656  
FLJ33360 43.3638918705225 30.6802399384205 38.6005272730664  
30.2675713925613 41.467005949568 41.9543948167375 43.5627649099623  
35.1738399826814 37.3600014814388 45.9004543328976 41.9083581529276  
40.8681871019812  
FLJ33387 50.7390160399184 40.7952353240579 46.3411353377615  
46.8954576545929 43.9450023643394 44.1737502492846 45.4799270968969  
52.5909491535773 40.5912213523345 42.9866214102525 41.3553369544097  
41.7575097298927  
FLJ33534 38.0089018744739 43.5873188565519 42.3536549114165  
45.8844325913247 48.0234896130991 43.5752393599169 46.8613212048981  
46.0633179231318 44.619512785899 68.0556717366572 46.2560238004757  
41.3481355128089  
FLJ33544 46.8954576545929 47.2770121962655 46.2625470410195  
43.074472921841 47.9128504683618 43.9724628401189 51.7714254834195  
43.2551508830106 45.3756389170606 46.1390887492649 37.9946685306274  
45.1735152121056  
FLJ33590 46.7293238583888 43.0227387991135 44.7829632472754  
60.3481762331447 40.7779767565889 42.4580504587581 41.8315602975157

50.9933795450314 46.581796165231 41.5435611403119 51.5822637582617  
48.1627097465883  
FLJ33651 44.2350046179299 44.1239711172417 49.5424425850549  
42.8235313007746 43.9450023643394 41.554942319225 43.4544762830742  
42.157627240486 39.0775870687758 47.9056710878325 45.0589947942306  
38.0452862258803  
FLJ33706 44.3355304829989 44.5152708955623 45.6989664108554  
42.8235313007746 38.745552403895 47.3791873993182 42.1607322031054  
40.1474543172332 40.4997186069494 47.0055981216687 44.4688999098904  
45.0985088502363  
FLJ33708 34.3473914754963 43.5873188565519 39.2707964550441  
35.8472302065546 41.6806984441849 35.6125439901743 37.6036146841933  
37.1317006162938 41.9635525160083 41.7405682794166 40.2649309204478  
36.9976231206067  
FLJ33996 57.2008272301399 45.7317208802318 52.7005092555102  
49.7350276169552 52.5645416722441 41.0582900711341 55.0897019602305  
55.8087097725119 47.1744296124496 51.9547984751408 52.104880481326  
45.4799270968969  
FLJ34047 46.6348258763289 45.4882438975269 39.5450079747895  
45.5869891570251 41.0885562160946 42.8598805316863 37.0564573649223  
46.7980335276155 39.9444191873552 39.8873706855774 45.7328341667151  
49.3087627580849  
FLJ34306 41.6354649482853 38.7344853699576 36.178547300352  
40.8681871019812 40.7779767565889 38.3418933808844 35.4623691645629  
37.4484310268909 39.6609238036815 38.957687788868 38.6662194645633  
42.4607795638552  
FLJ34503 35.8208542506595 33.3069622728735 35.3649449469275  
40.8681871019812 45.2556760873335 41.4508241771315 44.0687697278114  
42.8482181313226 37.3600014814388 40.1179210534118 43.1931731665131  
45.5800840647989  
FLJ34690 43.6706764143908 38.5252456306656 48.1331309338997  
39.6292788039793 41.6806984441849 43.6670755115848 48.8319884367456  
47.5950227477807 42.992884918158 43.844855336215 39.2542963855807  
33.4316681623175  
FLJ34870 43.6706764143908 40.9731067463382 41.8751578329365  
38.8495095797881 44.2607789091176 39.6251842352088 43.9450023643394  
42.6450179841129 44.8003345643334 40.8049408996274 41.1638563416981  
40.4639532172338  
FLJ34931 39.7576136507593 36.4002279956519 46.1653991089885  
38.2041059863839 49.9493230064613 34.2773859804062 40.6750540874299  
38.6454098044474 46.581796165231 43.2988017098387 43.0016969050339  
41.4508241771315  
FLJ34969 37.9387791625384 38.8336427948187 45.6989664108554  
41.4273122914951 44.6834648302383 36.2015763253919 41.0381860307445  
40.931294690669 44.3440839686558 44.8997235283254 38.5668610487033  
38.745552403895  
FLJ35220 47.9175508887533 39.6995529770239 45.310660704531  
50.8567345921473 44.0451487108213 59.4949177415847 41.253645578517  
53.9465584609317 42.992884918158 67.8233625051884 61.940656536312  
57.3697604614404  
FLJ35258 192.058030454066 61.1022920882065 52.3432130135266  
79.4528447794527 48.3814421939888 220.573371581491 41.1507980856436  
98.2074490157865 47.3791873993182 168.366869831376 139.693327116993  
72.2211523775459

FLJ35282 35.2267149016596 41.3610369241157 39.8299340037009  
41.0726336841311 40.6723334103791 37.7000400506818 31.6981395162348  
43.6434576713809 37.9273653326866 39.2623423164488 32.0500360504817  
44.6484005362281

FLJ35409 36.7356360093603 44.2630383225933 41.1367478979484  
39.9697332660833 42.3685136297603 42.2577689927563 40.4359177791566  
43.2551508830106 38.3418933808844 38.0078357808393 39.5399188536544  
40.1700117452801

FLJ35424 43.5710871617107 43.2149698150931 47.154615851079  
43.006072841282 40.7779767565889 43.5286328921307 45.1017494688414  
41.599960574499 43.1087085278313 42.9285286409526 45.9104478407175  
43.024125424819

FLJ35429 40.2543341073001 44.0409178714232 46.1653991089885  
46.0228732507872 46.7508829977587 42.357910063876 43.0930293831497  
40.5158867964016 48.1174861108648 37.7315666632629 51.838002904753  
42.0424641526302

FLJ35740 39.0620487644635 39.0102066700839 44.0451487108213  
37.29566077996 37.6527901109005 43.1826328292558 36.634024014558  
37.7612949798895 38.9834959368496 38.3092241935352 40.2649309204478  
39.4490233720848

FLJ35767 45.6517320730042 45.0905928998779 39.6451483836089  
43.6726153508978 45.5809132232681 42.2577689927563 42.629412460409  
42.8482181313226 41.3803269429468 49.9493230064613 45.2265319826548  
40.6614700944853

FLJ35773 43.6706764143908 68.307513091369 45.6989664108554  
54.8412943008635 40.8873907150245 41.7627910693483 53.3111230705754  
83.5767232665142 57.404059248727 43.6033221838149 47.2134341420411  
43.9541718254769

FLJ35776 40.0988483617359 42.0709558258414 40.6312687664188  
46.3203995372658 43.683792219729 40.7063426028871 41.8315602975157  
38.4540849632254 40.137818555383 41.9097689475185 41.1638563416981  
42.3117490140079

FLJ35785 43.0545608384625 41.413768254554 42.640829914102  
42.6913548400127 43.5880694884799 40.1428591998404 41.8315602975157  
42.1812299265547 42.2577689927563 41.3735882187951 40.7776803630095  
44.0977148249302

FLJ35801 64.4415447415281 77.268323196327 66.1541420734416  
55.2214187655851 75.5510570035251 77.2834482217973 83.0647477737971  
53.3094843669564 99.9057667432209 53.3059058105836 47.9942520395434  
55.7067742610401

FLJ35816 40.6559419616644 44.4411734611229 44.5134109184888  
41.5464765641928 52.9433495155796 41.8613406887824 48.6395795163502  
45.2806199505029 41.7627910693483 40.2112371512838 43.401782064778  
40.0557788909923

FLJ35848 42.0833588105728 42.1607322031054 40.0998167098057  
44.265834798964 38.7004513165111 42.5193208629123 43.3262148375525  
48.2109175258674 41.7627910693483 42.6793753550854 42.2618615571566  
42.7782216342806

FLJ35880 39.7576136507593 46.8954576545929 47.0940613507321  
37.8442841690502 52.2089306840125 39.8455060654531 35.4623691645629  
72.8378863017531 41.7627910693483 42.5664883002833 41.0808257270221  
42.8864415494484

FLJ35894 32.4552405279874 36.89524015739 37.7384958256497  
45.7397504535169 34.3633615460307 38.7340969861754 36.3194282084339



34.8949555140527 34.4716904283753 40.5090849993014 43.3085358214154  
44.9070250604284  
FLJ35934 48.1952521496489 39.5050383901884 46.4569566520107  
40.7481155008596 45.1137938810047 54.1440452292081 44.2166118829877  
59.220967994972 41.7627910693483 51.7594352155304 52.902043370862  
48.7814131120945  
FLJ35946 45.0985088502363 35.5310164682026 43.9450023643394  
34.1051821768421 37.956732373465 41.159706131351 38.6243997507646  
38.956280281655 44.4395580493118 37.0320432433314 40.0766543123257  
38.2350720635382  
FLJ36031 40.2543341073001 40.5400384479766 40.4070046183108  
33.1817617228171 38.5512429290626 39.0266821712099 38.4005795891396  
35.0510338774593 44.7058233759912 34.7308008643142 37.2892641289258  
40.6614700944853  
FLJ36032 38.5332184743306 38.1811246394237 39.991353369336  
41.5464765641928 39.5595233162192 37.0180934800573 44.6809101024392  
40.8833572570383 42.2577689927563 42.3606390470387 39.153226699662  
38.1421709520616  
FLJ36070 42.8036731479932 45.7317208802318 45.1569741609597  
50.7046706880325 71.4183281327686 47.4699236780425 45.3597029614942  
46.9986083378817 51.5888395924843 52.5522545249206 57.2979215534929  
47.8931773060789  
FLJ36116 47.6397712007919 48.9899488302637 47.7737810047679  
52.3004056941891 41.6806984441849 44.7804080899431 41.3594868055879  
47.0940613507321 50.3245489035833 48.9826868640753 44.8872784170036  
43.5738557773903  
FLJ36144 38.2403867579549 37.6383530120621 38.4043916290561  
40.0698728584484 39.4693871570028 35.2463080299457 40.9647597231175  
36.7030475121778 39.5377896745682 42.3433931248155 39.3895791800635  
40.5281496800812  
FLJ36157 45.8108990837624 40.148780650831 42.5406888281114  
35.49696651597 41.3755760434934 42.157627240486 44.8643898647322  
39.6474008369935 39.4762546236449 45.4614234442527 43.844855336215  
40.2669497398702  
FLJ36166 38.1169703906207 34.9262464079777 42.4580504587581  
38.0958223740111 37.8679241954337 36.8059561571675 43.4544762830742  
37.2237132058632 39.1790517315259 38.4187686307607 38.4689132737495  
37.0953622406687  
FLJ36208 50.379587451669 47.765848710116 49.7350276169552  
58.5406981871153 49.5666074434383 49.9699131196797 55.0897019602305  
41.4508241771315 53.838484549134 53.1993028936883 56.8436081694537  
54.4313108506244  
FLJ36492 42.3433931248155 38.9338521051669 41.1367478979484  
43.1847628331565 47.6884372645373 37.5887129572848 39.1539892144371  
43.7396619462033 40.0403898620771 45.5776159432079 39.7342718293432  
44.7401523707775  
FLJ36644 37.55264801907 50.0425298550559 38.6727842796202  
42.2496337895968 45.6895223823001 44.3648993568405 53.4921736109774  
39.6474008369935 48.1174861108648 46.2286164776607 40.1742127891824  
39.9519547348106  
FLJ36701 42.2455707947223 42.7775752471711 45.2313723727673  
39.2780515621926 41.9842695818285 44.9896851005259 38.7337086062875  
47.5950227477807 39.5806465938526 42.0621425894624 40.6373400186325  
39.0536056496869

FLJ36848 41.4508241771315 43.5873188565519 37.9482157381008  
35.314469458379 33.3231576795423 52.4351670989268 33.4316681623175  
38.745552403895 43.2761454096265 39.0648733099061 36.0481934423077  
42.2577689927563  
FLJ37078 67.4846787600629 51.4413099192899 52.3432130135266  
60.620259884953 66.4047895961325 44.5544727111028 63.5738862549306  
112.506613718654 101.46584765758 79.7389069715403 63.4323398447015  
54.9919060580109  
FLJ37201 41.3387790895716 41.8848959280916 41.6079958749402  
42.357910063876 43.844855336215 43.0860383229288 38.8417151851134  
43.7396619462033 35.5220586859301 40.6022003765153 41.9908237694988  
41.2437378488025  
FLJ37228 40.8681871019812 39.3999056968598 42.5406888281114  
42.357910063876 43.6587492470348 41.0582900711341 39.0458123429605  
41.6466169548846 48.9931786790166 40.8970401536578 46.1673159982664  
42.0424641526302  
FLJ37307 38.385865183581 42.1607322031054 40.6737160001291  
42.357910063876 40.8873907150245 37.3799542961839 35.9894133432376  
42.4580504587581 41.1742244762318 41.3321861371202 41.1638563416981  
40.2669497398702  
FLJ37396 62.8635815439291 48.1627097465883 52.8041782638549  
75.2475238554276 53.0419743379342 58.9676332048764 67.2811786080606  
88.1861828863404 54.5952754712007 76.5375674421131 70.3381994440425  
63.3578893149245  
FLJ37453 42.2455707947223 53.6429962450784 48.1997158668729  
47.9915414951747 56.5933259268408 48.7781962164988 81.2136969156029  
48.6441988290952 54.2825877218965 49.7259371799014 50.8826620053386  
43.7672102682067  
FLJ37464 40.5654775358427 52.8264142735929 64.5232087947596  
49.7350276169552 46.1804647841331 39.132725377815 39.4600924554505  
79.1039287828151 44.7058233759912 80.3915591207869 64.0541263553251  
59.4465684293847  
FLJ37543 39.266565827316 35.0222940937513 33.7737772393677  
37.7469621225553 42.9090346219023 44.4619248757502 45.6042625176633  
37.9837233601316 42.5406888281114 41.3321861371202 40.723990462047  
44.7401523707775  
FLJ37587 64.1882546112044 37.3634897565502 42.9104454767916  
43.3078542962968 42.4864576619427 34.1806289878747 42.629412460409  
39.2672712041774 42.357910063876 42.0621425894624 37.8372168909583  
44.1452943804044  
FLJ37673 41.5421429082231 45.1694246393676 44.1452943804044  
37.9875302985336 41.8806343997257 45.4882438975269 39.3585350448719  
43.6434576713809 40.7847110517594 41.1222709786153 46.6442692119997  
43.1805016690297  
FLJ38377 48.0201377454632 41.0678614026819 39.0775870687758  
42.357910063876 40.6723334103791 41.8613406887824 40.9157352260901  
41.6466169548846 48.3119523820103 44.8997235283254 48.6184776976167  
41.0657892043496  
FLJ38379 37.5979144071815 35.1527542166156 40.0998167098057  
35.4371093426046 36.2048942610546 37.4498437754934 35.7666990316043  
38.0240760521689 36.6312676076142 37.3674112783848 36.178547300352  
39.8497227447888  
FLJ38482 84.2728210732532 149.832238573027 194.469250918013  
158.225884127529 237.401487995882 124.22494803053 134.908982962131

59.3164315859919 127.78061946174 90.8188865732032 104.02653369229  
109.017269529278  
FLJ38717 107.325456368022 55.6323803479191 80.7338782543351  
93.1668080716761 52.9433495155796 49.9699131196797 70.7238101239421  
84.7642634532073 75.0310858627394 88.6608345370342 77.2834482217973  
84.7058085717914  
FLJ38723 42.0532901689036 41.6466169548846 43.4709415392696  
42.9358255168086 42.4864576619427 29.4322896559759 52.0942589368478  
39.1652965788406 46.0106098064475 44.4652605017595 37.9946685306274  
42.6758568421347  
FLJ38773 41.6354649482853 36.7976562409506 42.9104454767916  
41.4273122914951 40.3452320167286 39.0266821712099 43.9450023643394  
40.7311497914871 37.2810767789306 38.8507804383261 40.2649309204478  
38.1421709520616  
FLJ38969 50.2203578628217 46.0713306971594 47.4740726032707  
48.4916117779992 56.359578588344 48.6621527194963 58.0139597055449  
54.5125550937898 51.1055541075029 46.1390887492649 42.5426057453993  
46.917149434588  
FLJ38973 42.8036731479932 44.2105195734073 38.4043916290561  
38.6414316877471 53.0419743379342 35.7034203372528 42.2577689927563  
43.6434576713809 40.0403898620771 34.064698871541 42.7275315121163  
44.3521099857368  
FLJ39061 39.8234920704779 39.1553169409075 40.5734458834617  
44.9370339275041 41.2740822675592 39.9777866059804 43.6753843488695  
41.2551966132486 45.6080994842498 44.6235437216725 41.9908237694988  
42.2577689927563  
FLJ39080 45.7356815244513 46.4385386401326 49.2041300973417  
49.5424425850549 52.0583273941813 46.574682061365 45.1017494688414  
49.2019743609873 52.1186591838715 47.611018474151 41.3553369544097  
41.7575097298927  
FLJ39632 66.6547247910487 152.608998839745 127.265200736376  
46.8954576545929 219.838542502016 49.2050538150106 41.5421429082231  
79.2701322339022 195.303781999387 48.2596564318071 48.1682125052975  
40.7704587752083  
FLJ39639 45.4799270968969 49.4067286971348 72.6731815563159  
84.8948024208923 54.4586176399381 66.8632294055679 49.8281348927244  
49.3880946790306 42.7150227340364 74.2379710965903 64.9959712888709  
52.6922486991742  
FLJ39653 75.0704619826557 59.6359245937831 101.693848821246  
56.0794100106654 95.6182216943758 55.540888910486 70.5534237141767  
55.1109784383525 111.291087721139 142.444971930298 89.4747568145717  
88.8330881965986  
FLJ39660 45.0985088502363 42.5269793679335 38.5045333213784  
42.1273928203021 56.6951078698291 44.5544727111028 36.3194282084339  
50.0526763693329 48.8842909466002 37.2089297656361 36.6298807161755  
35.7451401627836  
FLJ39739 41.4918397757335 38.7476648567356 41.8291484190524  
40.5998758007868 38.3085139808968 38.7679739198116 41.1033381844231  
38.6151680924119 39.4433784795209 40.3548989788016 40.0766543123257  
39.6682560919759  
FLJ39827 132.257197568848 114.876346000655 77.3367966395554  
72.4834467838798 135.567012693522 120.618530729822 128.966814822678  
83.9236799134394 139.49198349194 119.301672388541 101.540333720181  
88.8330881965986

FLJ40113 43.1087085278313 44.9888573005713 44.1933547401128  
40.7988621011332 45.4008983015065 40.7013550424464 42.629412460409  
43.375692472202 45.6057977304398 45.2089696897205 47.1978679867866  
48.303052868477

FLJ40125 53.8856501960117 44.0409178714232 43.1931731665131  
49.5424425850549 38.2496050953547 45.0882356578404 37.7136011474903  
52.5098795466615 44.0519245668737 56.1912096308988 39.6403089864678  
95.1224420992193

FLJ40142 82.1062834830477 83.6351558609087 70.3309641302984  
56.6458456890715 103.356071080819 66.7768390362438 83.374777060444  
56.3560498705517 78.9203273221608 64.1097859982912 69.2293488487819  
71.5484567134601

FLJ40194 37.7384958256497 46.1569135229922 42.3536549114165  
36.6501141438378 38.745552403895 37.2686490268265 37.4772922422734  
37.0390589468421 34.6720534245631 39.0648733099061 38.5668610487033  
35.4484652445078

FLJ40235 44.1294459089314 42.6939394537076 35.4484652445078  
44.7980740332174 41.2740822675592 35.0970060242246 39.6535880152834  
36.3405039629059 38.5252456306656 42.3606390470387 38.3684202018524  
43.1805016690297

FLJ40243 37.6397652536077 38.3322849790657 33.553634633839  
33.1817617228171 38.2496050953547 37.1317006162938 36.3194282084339  
35.0510338774593 35.2143190355414 35.2880714952489 36.131485826118  
35.6427313468066

FLJ40244 41.2424637338424 40.716553247236 35.7105247506212  
43.6726153508978 39.0564222526273 41.159706131351 40.0052661202207  
37.86982638952 43.9450023643394 41.9666541498638 39.4410515050885  
41.863927676552

FLJ40288 39.3709357615493 43.0971787292711 39.3709357615493  
38.6414316877471 38.745552403895 38.9378717994178 37.1643693306382  
46.1673159982664 36.7267557061938 38.957687788868 44.4688999098904  
38.8495095797881

FLJ40292 35.1307934330047 39.6995529770239 42.9104454767916  
37.0732977341185 43.5544347011646 40.650742261428 33.8558232866797  
39.4710743516517 33.2715481910159 42.6793753550854 40.547835538778  
43.2776458914333

FLJ40296 41.7884142319151 40.148780650831 40.0557788909923  
40.5061122751948 38.7153183948786 40.5703581862752 40.8714654152472  
41.7419877611072 42.8542642792862 40.2579040125416 38.5233040786032  
40.6614700944853

FLJ40330 39.7576136507593 42.2900457798748 39.991353369336  
41.8291484190524 42.039525923161 39.266565827316 40.0052661202207  
44.7044140979108 44.5678064264717 39.1177164316495 39.1878770155069  
43.2177497174408

FLJ40411 39.3709357615493 40.5400384479766 42.157627240486  
44.9370339275041 39.0564222526273 42.0574848021044 42.1607322031054  
39.3709357615493 47.9035532886869 40.4136535208406 42.7275315121163  
39.6352613956998

FLJ40448 46.3390850717989 41.0678614026819 36.769073068743  
63.0153175111747 40.4639532172338 44.3648993568405 46.4388841354122  
46.4672637826582 53.2046867327331 45.4614234442527 51.9302027391447  
57.8111054584154

FLJ40453 37.0320432433314 39.4629815741023 39.3709357615493  
38.5707420487455 38.2083710281545 39.6251842352088 38.1169703906207

37.7217193704498 42.4540072551568 41.4659679379482 39.0061493066838  
37.8490162439785  
FLJ40473 38.2083710281545 44.4411734611229 42.8270038153139  
42.8235313007746 41.0885562160946 43.1826328292558 43.6753843488695  
39.9576138799997 43.1805016690297 42.9866214102525 40.6373400186325  
43.8575940017119  
FLJ40504 680.837950890159 307.264133974364 276.214079735778  
53.8732900241064 194.355765743782 69.5645254789371 338.053116855608  
1712.55038816005 312.154320305976 246.274692971423 253.527553472516  
160.499410146402  
FLJ40712 43.5710871617107 42.1607322031054 43.3085358214154  
38.0958223740111 39.0564222526273 47.4699236780425 50.2016912396771  
49.8344973836834 41.6616444147804 52.2256177934134 44.6286581923295  
42.7782216342806  
FLJ40722 117.539037885384 88.4385631861141 112.159199477006  
130.908206625954 74.3523005665671 70.6311537856734 108.806649898122  
166.36685654692 89.4111455826308 160.360785581153 145.936763882526  
121.969082013079  
FLJ40852 54.6235981131919 49.3581578587582 50.6004078448405  
51.7739270955254 45.2556760873335 40.7616966228404 47.5963750520409  
56.8094693588238 53.838484549134 69.0530953932111 52.7817052791259  
50.8999542937724  
FLJ41046 43.4626049853157 42.5269793679335 37.5597671487621  
39.2780515621926 45.1137938810047 40.040778349137 35.6056062164318  
48.272324215504 41.6616444147804 42.6793753550854 43.3085358214154  
47.3992733452821  
FLJ41170 43.844855336215 37.4540772310118 44.4311655729487  
41.5464765641928 45.1137938810047 41.554942319225 38.7337086062875  
44.5029690493211 42.6366765186182 44.6918600441328 36.8282383070068  
38.8495095797881  
FLJ41200 39.3709357615493 42.6939394537076 35.2101597814352  
49.7350276169552 35.7973685350741 47.0940613507321 41.3594868055879  
52.407151732257 48.2123120250343 45.5776159432079 43.0016969050339  
41.5536168238478  
FLJ41327 45.9090659324223 41.8848959280916 48.6037684272115  
40.5484717678957 32.9756367838345 39.0266821712099 39.4600924554505  
38.3684202018524 39.0775870687758 41.7405682794166 39.9070785037411  
35.3525469364579  
FLJ41352 39.6349162264993 42.2192468749755 39.991353369336  
37.8072702808148 41.0448919024758 43.9351969768311 41.8887298788489  
41.0808257270221 41.1367478979484 39.1621898366355 39.5748670524951  
38.2795150354677  
FLJ41423 235.33716196909 147.209004629384 232.402174615698  
278.453446231317 188.670053901101 171.689014874037 222.81957100654  
259.456935785521 161.008205823493 250.504350952583 217.263889616995  
178.661935292895  
FLJ41481 45.0985088502363 42.5269793679335 38.6727842796202  
40.7481155008596 40.148780650831 43.4681646416585 42.629412460409  
45.8669209716694 39.2809305246091 47.8207974930031 30.7315474127249  
34.4570158133896  
FLJ41603 69.6449298794042 44.0409178714232 43.6670755115848  
56.0794100106654 46.8674366115656 69.7677752398541 45.4799270968969  
50.1833483241864 51.8083208406279 102.136265168978 70.2215218476683  
61.6311118308635

FLJ41649 42.8036731479932 33.0553208959996 39.991353369336  
38.745552403895 36.8059561571675 38.3418933808844 38.5066108855005  
40.7311497914871 41.4636047919453 39.4710743516517 43.5710871617107  
41.6550823405646  
FLJ41733 40.4639532172338 36.3110701990588 36.8730514568925  
37.9875302985336 45.4751076037511 37.2686490268265 38.0598374201407  
43.7396619462033 37.4540772310118 36.3612409063792 41.9908237694988  
38.9496515344837  
FLJ41766 53.4921736109774 47.2770121962655 59.2012779686869  
44.1483976313959 52.2089306840125 58.9676332048764 49.540449125788  
45.2806199505029 40.8970401536578 52.7972156492746 60.6505672212119  
50.7487159427973  
FLJ41821 35.4287975493553 37.5469247328848 38.3166554965434  
41.6564075217517 34.7018263647985 34.8956628705329 40.1235656101329  
37.9837233601316 34.7722083264266 35.93950183586 39.2542963855807  
30.8150126829901  
FLJ41841 38.2083710281545 42.2577689927563 39.1799070031819  
34.5425384901279 37.6527901109005 47.5733603903505 39.5496902678788  
39.1652965788406 41.4636047919453 41.7405682794166 38.2795150354677  
39.5418280570561  
FLJ41856 41.0608773166058 38.5252456306656 43.0971787292711  
38.4208429103799 42.6022652963326 42.750861693377 33.8558232866797  
35.2642250366721 43.4656637536244 39.7835513496873 44.553780984244  
41.5536168238478  
FLJ42102 34.6977013306396 39.1982470626863 38.4043916290561  
38.2041059863839 40.5710637884029 38.1169703906207 37.3799542961839  
38.079222289614 38.6322728994674 38.4187686307607 33.6902293666089  
39.8497227447888  
FLJ42133 44.9896851005259 41.4508241771315 40.6737160001291  
42.357910063876 45.5809132232681 39.8455060654531 50.0088611244948  
36.7460922671619 44.1519466943185 46.7646877499666 45.2265319826548  
45.0035308952466  
FLJ42177 39.5676051939342 45.8669209716694 35.5220586859301  
46.4555908533915 42.4864576619427 37.9003288112261 37.7136011474903  
63.1604223919703 38.5252456306656 47.2299678280724 49.2206713037152  
43.2776458914333  
FLJ42220 45.0985088502363 43.5873188565519 37.1643693306382  
39.853175885492 40.5710637884029 38.6414316877471 36.197424053556  
36.6452480995946 42.1594905198929 44.2580151149956 43.0016969050339  
38.8495095797881  
FLJ42258 43.2135791259317 47.9665737016961 40.6737160001291  
46.614092935749 44.6834648302383 49.1718303518849 45.6042625176633  
43.9366081640576 44.2607789091176 46.0119912782855 45.6706505553383  
43.5738557773903  
FLJ42280 61.356483470053 43.3458769998118 34.9849896310235  
39.9697332660833 39.3667161654772 38.4330755397458 30.561906108551  
41.6466169548846 42.1594905198929 43.9450023643394 36.3390947880186  
42.4607795638552  
FLJ42289 42.5193208629123 39.7835513496873 40.0998167098057  
44.1483976313959 54.1225249245036 38.1169703906207 36.5352572191451  
36.5393857306744 44.5303781239209 41.1222709786153 39.9070785037411  
40.6614700944853  
FLJ42291 41.9407041937973 43.2649781354792 39.5450079747895  
47.0874209746031 40.5710637884029 35.2067831864574 49.2546642180676

40.3357777530419 45.0017158586743 47.9056710878325 41.0050831223107  
44.9070250604284  
FLJ42393 59.2903915056319 47.8400694856726 49.4573631027613  
48.665578118898 56.1186281675573 56.3525213736952 56.0515443021293  
56.3560498705517 53.2046867327331 60.7495043977707 55.9269493191353  
55.7067742610401  
FLJ42418 43.0001432913058 46.5650556481721 46.6588655218735  
50.7046706880325 44.147557390293 43.5752393599169 45.8980298854198  
45.8669209716694 42.4540072551568 43.7303813515864 42.170702295259  
39.8497227447888  
FLJ42709 38.0089018744739 46.0023068797812 41.3366779545815  
51.5913529948887 45.2556760873335 43.9724628401189 42.8684958525042  
40.7311497914871 43.8482802038826 42.3606390470387 43.3085358214154  
43.1805016690297  
FLJ42842 38.2083710281545 39.0102066700839 40.8420925848403  
39.9697332660833 46.0977687311222 41.2567470068038 38.5066108855005  
40.7311497914871 42.0621425894624 40.4136535208406 39.3667161654772  
42.57175366709  
FLJ42875 47.2862299990938 43.4396866157171 42.9104454767916  
52.8502823653368 49.8304479381623 49.8472708021525 67.2811786080606  
84.607833108004 42.5406888281114 46.1390887492649 46.824299585607  
48.5123041297835  
FLJ42953 43.5710871617107 42.6022652963326 42.640829914102  
46.7577982595088 50.5110359971301 44.3648993568405 40.6750540874299  
39.853866204927 40.5912213523345 42.8936990772838 44.6286581923295  
44.0451487108213  
FLJ42957 44.5282181324797 42.8542642792862 37.3687900733549  
40.7481155008596 37.4470183315826 42.8598805316863 39.5496902678788  
40.931294690669 41.3803269429468 37.3179578037963 41.6336636285875  
39.9519547348106  
FLJ42986 50.4872122867759 42.9887069977696 39.9101908547397  
44.8784374362948 42.1650127805175 37.4782441311626 37.1643693306382  
40.047314525032 42.4540072551568 41.4397539024976 36.6298807161755  
35.2101597814352  
FLJ43093 41.4508241771315 50.0425298550559 45.989212296035  
56.9299697426319 40.0599807618105 67.8208976798364 43.4544762830742  
43.9366081640576 40.7847110517594 42.8936990772838 41.7272875295469  
49.4786466722535  
FLJ43276 39.8662795144616 37.10170285405 39.8299340037009  
37.7469621225553 41.2740822675592 37.5887129572848 37.8877750141557  
39.4223544019653 38.3418933808844 40.2493681589104 39.8184668132023  
37.4554876386402  
FLJ43582 44.7915315085948 41.8848959280916 42.4580504587581  
50.2163892855092 47.3172462673426 44.7804080899431 46.1634822993009  
45.3872406432794 46.4861258030402 43.6033221838149 51.3103617600342  
37.8490162439785  
FLJ43663 57.6285775590145 47.765848710116 50.9010149857308  
91.9185612536409 53.8260140375214 59.9876575158981 41.3594868055879  
59.8760452220989 47.798305839406 45.4614234442527 50.8826620053386  
61.7502624458447  
FLJ43692 128.374733248762 220.85458646522 293.516547661658  
47.9915414951747 236.440703574276 77.2834482217973 90.7037473522607  
172.89937021234 334.016152807947 182.80711310964 110.729504563799  
234.727123301682

FLJ43752 43.7585538437696 43.4396866157171 45.310660704531  
43.4410741327254 54.5683518971261 44.6524308640784 52.7002314230604  
46.1673159982664 43.5669306063196 44.1379638573455 40.6373400186325  
48.6795178347248  
FLJ43763 40.7609952437622 34.2618170189676 48.1331309338997  
39.9697332660833 40.8873907150245 40.9506062495231 40.7910160811527  
40.5158867964016 39.7537274655115 33.8984830800739 37.3687900733549  
41.863927676552  
FLJ43806 38.957687788868 42.0709558258414 40.0998167098057  
43.6726153508978 44.5668141895992 43.5752393599169 43.0930293831497  
43.6434576713809 39.7537274655115 41.5435611403119 40.9157352260901  
35.8429598823818  
FLJ43826 35.5179217192467 40.0527893189096 48.1997158668729  
40.9607305725196 38.6454098044474 40.244271403831 44.2166118829877  
36.3405039629059 37.3600014814388 40.2112371512838 35.4386677371439  
45.2783024981315  
FLJ43860 42.3620028137457 39.1539892144371 40.931294690669  
38.1472552468971 42.2455707947223 41.6045220683604 40.9811982338594  
40.4359177791566 44.2142581488029 41.2651195687914 43.8855280305245  
41.3481355128089  
FLJ43870 42.0532901689036 43.9421822132391 43.401782064778  
40.7481155008596 44.0451487108213 43.4681646416585 39.5496902678788  
44.7044140979108 42.4540072551568 35.4990901121893 40.4504608195666  
44.3521099857368  
FLJ43879 48.8941062980393 48.0296332183129 42.5406888281114  
46.614092935749 46.0043807840705 44.9896851005259 36.7356360093603  
48.3590401011623 40.4997186069494 47.611018474151 44.9713479185144  
41.863927676552  
FLJ43950 45.4507786740825 46.6578431194852 43.3567925731226  
46.1074305700679 43.5836473788312 43.1358833499227 43.4844452775022  
43.8801268237207 45.6582729799009 45.2949878966345 41.8168470823451  
42.297291190584  
FLJ43980 37.3463875295726 38.1312950900467 37.4642807402741  
41.1886975241176 42.4864576619427 35.7034203372528 42.0605906240248  
40.4359177791566 44.1519466943185 42.6793753550854 34.9428206949566  
38.8495095797881  
FLJ43987 40.4639532172338 42.4493032770053 39.3709357615493  
37.7469621225553 39.4693871570028 42.9695585740813 37.2892641289258  
38.8495095797881 40.5912213523345 44.2580151149956 38.6662194645633  
37.6557714476853  
FLJ44005 43.844855336215 48.109747794187 40.6737160001291  
46.1673159982664 43.004943518025 43.9724628401189 43.8206425661746  
44.6107027295193 49.1940901905636 38.4187686307607 43.401782064778  
40.4639532172338  
FLJ44006 40.3478825593224 39.6995529770239 40.4070046183108  
40.4359177791566 39.1650142708257 39.7394181011603 46.0228732507872  
45.0972184964705 38.0213051227859 36.3612409063792 38.6662194645633  
34.5633623842083  
FLJ44048 43.844855336215 44.5884811528117 52.3432130135266  
43.1847628331565 44.9936360641969 38.6414316877471 39.7576136507593  
39.5466975353131 36.9060997041453 75.0665411373616 36.43924066428  
38.3291713594599  
FLJ44060 43.0930293831497 34.9262464079777 29.4322896559759  
38.9534635879195 43.1252272136667 41.4508241771315 42.2577689927563



47.8947595316832 43.9450023643394 40.5090849993014 37.7384958256497  
41.3481355128089  
FLJ44076 44.1294459089314 36.6968906669565 40.8420925848403  
38.9534635879195 41.0885562160946 42.8598805316863 40.5585676679482  
39.7509165247419 43.5669306063196 46.6598879466655 39.7342718293432  
42.57175366709  
FLJ44112 36.1232327599945 38.2263227947189 38.6727842796202  
42.4580504587581 38.745552403895 47.2009420656854 42.357910063876  
42.5435283762933 39.9444191873552 43.0919221375514 41.0050831223107  
38.5279745308203  
FLJ44124 1020.75813028358 629.532332373083 851.813216452015  
836.472724085903 464.671881584567 542.467997217663 749.49934348018  
1394.28860933629 440.421077161585 1090.86617066541 1307.19925493293  
1004.8679675716  
FLJ44186 42.3433931248155 44.3529919625344 37.1643693306382  
44.9370339275041 50.8875036861067 41.9543948167375 43.3262148375525  
40.7311497914871 44.8003345643334 41.2276963324981 45.4799270968969  
43.8575940017119  
FLJ44216 35.9305494063137 36.89524015739 46.5650556481721  
31.3142073726046 39.6535880152834 42.6575535390785 33.3231576795423  
35.2642250366721 37.0126425326534 29.9617615620508 37.7384958256497  
34.806104801006  
FLJ44290 42.2455707947223 41.9894412416874 42.0621425894624  
45.4634652319753 44.147557390293 40.7616966228404 42.7431359850339  
43.9366081640576 48.1174861108648 42.5664883002833 42.4580504587581  
41.7575097298927  
FLJ44313 40.0557788909923 37.5469247328848 39.0775870687758  
37.651298468202 31.9468644542969 34.0777108441756 31.197411437683  
37.7612949798895 36.197424053556 38.957687788868 38.3684202018524  
42.0424641526302  
FLJ44379 42.0532901689036 45.0905928998779 33.6816578730693  
34.5425384901279 35.4484652445078 38.1169703906207 40.0052661202207  
33.8558232866797 44.7058233759912 35.4990901121893 35.7953070087288  
34.6720534245631  
FLJ44385 50.315768338317 40.8880530359822 39.2707964550441  
36.7892997857376 38.4540849632254 35.5158505219112 35.7055410599146  
41.8417024632349 33.5578650644246 38.8507804383261 43.844855336215  
30.6242215267208  
FLJ44450 38.1169703906207 38.6414316877471 42.2577689927563  
38.6414316877471 48.8381507187986 35.5158505219112 42.4939802311136  
38.2782436497441 44.619512785899 40.5090849993014 37.7384958256497  
44.0451487108213  
FLJ44477 42.0532901689036 41.8073910693411 40.8420925848403  
46.1673159982664 44.8897737954573 50.6360662655392 55.9276266345493  
44.2159020605784 40.0403898620771 43.0919221375514 47.8284278211109  
43.4709415392696  
FLJ44606 38.5648843914189 46.29198852834 54.4384603094793  
41.3027031037343 37.7576900881741 45.1873487463472 51.0013344286851  
50.5070012045444 49.0986627051784 46.325232414659 43.0016969050339  
48.8670821164567  
FLJ44635 39.2076937845359 37.3634897565502 41.0356368374708  
39.7411455670172 39.2114264935239 37.1317006162938 34.3135545118996  
40.7799172560245 39.5806465938526 41.2598458726002 40.3452320167286  
36.1647506311964

FLJ44653 38.7537364570873 41.4508241771315 42.2577689927563  
42.4580504587581 43.004943518025 45.6129956328415 34.4570158133896  
38.3684202018524 45.1899271235974 42.785429206422 46.2560238004757  
41.9430737035925  
FLJ44674 38.5007204246293 34.15544299189 41.437237454134  
29.8304689114955 37.2567512265363 38.2293008890613 36.634024014558  
43.1567024035183 38.9006788676407 41.2276963324981 40.0766543123257  
39.3575468494941  
FLJ44790 41.9407041937973 39.8695929627783 37.5597671487621  
36.890925044696 41.8806343997257 42.5660695551615 45.7452456977857  
34.1806289878747 44.3440839686558 49.0841460667818 40.723990462047  
49.0655215909632  
FLJ44815 37.7384958256497 40.6380495994768 43.0971787292711  
39.853175885492 33.2021437980841 36.9060997041453 37.830876898596  
39.4710743516517 42.357910063876 42.9866214102525 43.9450023643394  
38.0452862258803  
FLJ44817 33.5994525227062 45.0905928998779 46.7508829977587  
42.4580504587581 38.6454098044474 40.244271403831 40.4359177791566  
39.9576138799997 37.6383530120621 40.6022003765153 38.745552403895  
40.1700117452801  
FLJ44861 37.1485601150873 44.5152708955623 38.0452862258803  
42.9358255168086 31.5599106749655 38.4330755397458 44.6032218589199  
43.3262148375525 36.197424053556 38.2069499294002 35.1470994647364  
38.4330755397458  
FLJ44881 44.9896851005259 34.2618170189676 40.7620472083159  
41.8778873678551 40.0599807618105 39.132725377815 43.8206425661746  
38.2782436497441 44.1519466943185 44.1379638573455 44.0409178714232  
41.9430737035925  
FLJ44955 42.3433931248155 47.1332119496722 35.6139301508335  
36.3604951341921 37.2567512265363 50.6360662655392 38.1793598983615  
50.9933795450314 40.4997186069494 37.1275334308172 40.4504608195666  
38.5279745308203  
FLJ45032 39.3709357615493 40.6380495994768 50.8303921211581  
40.0698728584484 56.0642694832108 39.2248354955045 39.7576136507593  
47.3172462673426 47.5057905459278 39.6719190054379 42.9634662926872  
44.0451487108213  
FLJ45079 46.263826584899 38.7344853699576 38.6005272730664  
41.7614975630362 41.0885562160946 38.2293008890613 39.2533668167483  
38.956280281655 35.9645119596869 45.6868589181768 34.6366195121669  
36.3454320848591  
FLJ45121 42.7150227340364 38.7344853699576 45.063792968927  
42.0102671859606 37.8679241954337 40.4359177791566 42.0605906240248  
42.357910063876 38.7298222155532 42.8936990772838 41.0808257270221  
43.0930293831497  
FLJ45139 38.957687788868 39.9697332660833 42.0621425894624  
35.49696651597 35.9894133432376 37.9003288112261 43.0930293831497  
43.7396619462033 37.5469247328848 36.8059561571675 40.8225507267584  
37.8490162439785  
FLJ45202 38.8561375693335 43.2649781354792 43.0971787292711  
42.6913548400127 40.6723334103791 41.2567470068038 40.2154497375715  
40.6171774724171 37.2810767789306 39.4710743516517 45.1432412071268  
48.27609330316  
FLJ45224 46.7293238583888 48.6447083765118 49.2041300973417  
69.1931891474114 44.5668141895992 45.3882138838137 56.3376046940285

46.1673159982664 42.7150227340364 47.611018474151 46.6442692119997  
44.2527566343661  
FLJ45244 79.0304119352941 53.8499082625091 104.250582652805  
59.987045425047 68.1674425673171 62.3497263884167 72.1401612718245  
73.2037966614621 78.6048653630165 115.98265270452 90.3114947219972  
87.8967913380047  
FLJ45248 41.2424637338424 36.9994058279362 41.8751578329365  
45.4634652319753 43.5544347011646 36.3845892764084 52.4111687156893  
43.7396619462033 44.4395580493118 38.4187686307607 46.972521499515  
42.2577689927563  
FLJ45256 50.315768338317 45.4143854024453 44.9758339877851  
53.0284011078097 50.6470461863549 43.7630587657205 49.3854238365325  
55.6904617926772 41.863927676552 51.8412522234186 51.5967098638347  
45.6233434183356  
FLJ45300 43.0930293831497 45.4143854024453 42.7303139017786  
49.3654837541353 43.844855336215 43.7630587657205 41.3594868055879  
35.9023742468744 33.6902293666089 50.7855742231932 43.6629145624937  
43.3744503319109  
FLJ45337 58.5759178381027 62.9904770954043 60.6567691532561  
55.6481366056639 52.3242437351389 61.8187341713197 66.8475050031365  
57.9713749600418 62.6386437936516 58.6439719071099 59.6608518093582  
50.1579724208315  
FLJ45422 38.5007204246293 43.3972849968032 40.7910160811527  
49.7350276169552 43.3332476888305 46.7386599624801 43.2721716572958  
43.1567024035183 48.3119523820103 45.8471859855979 44.8372404608604  
43.4709415392696  
FLJ45445 40.0557788909923 42.0709558258414 42.281606728072  
46.6849259108754 48.7288537840562 41.3135088038412 45.6706505553383  
43.1931731665131 40.6957787921451 43.6670755115848 44.4329005595031  
43.0930293831497  
FLJ45455 40.2543341073001 42.3550738181144 42.4580504587581  
42.5664883002833 46.7508829977587 39.6251842352088 51.9421032049606  
43.1567024035183 44.8003345643334 44.571915452417 40.8225507267584  
45.5800840647989  
FLJ45537 37.3463875295726 43.683792219729 39.0470836345045  
42.7489468897708 41.8441156763056 43.7630587657205 41.4742337714895  
40.7311497914871 40.8970401536578 40.7063426028871 42.5023941254529  
40.5235471987417  
FLJ45684 42.8036731479932 47.3536182445315 40.4882741869718  
40.3180310664156 42.9090346219023 39.132725377815 38.941855825269  
44.9977782988116 41.1742244762318 39.9948390976317 37.9230440150891  
47.3992733452821  
FLJ45717 41.3387790895716 38.6414316877471 40.931294690669  
35.9521941716188 52.9433495155796 45.7300501624017 50.5252048155459  
47.7889447429963 47.7086093893038 41.5435611403119 54.2999306485758  
38.745552403895  
FLJ45721 42.1537476443423 36.6002100641539 39.7411455670172  
41.8778873678551 43.2484996523549 44.9896851005259 33.2425023465738  
39.4710743516517 46.9739160257217 40.8970401536578 37.6484782516569  
46.4499258373233  
FLJ45803 43.4626049853157 45.0115870036541 59.2778887402357  
47.9915414951747 54.4586176399381 54.7083331985678 65.524821699432  
55.421880601441 93.8042295944812 89.1516394894484 108.599492114105  
71.6502000742477

FLJ45831 44.9896851005259 41.9894412416874 39.8299340037009  
38.2041059863839 41.0885562160946 43.1826328292558 38.8417151851134  
39.7509165247419 40.137818555383 39.9948390976317 43.0016969050339  
37.5556299264699

FLJ45832 44.0328992213727 44.5884811528117 40.4882741869718  
42.8235313007746 50.3713170502557 43.2805590023412 39.5496902678788  
38.2782436497441 44.4395580493118 41.0057887014368 40.1742127891824  
41.7575097298927

FLJ45964 34.4021554788966 40.0527893189096 42.4580504587581  
42.1273928203021 36.9060997041453 41.554942319225 43.5627649099623  
39.1652965788406 42.9020321355927 38.745552403895 42.7275315121163  
35.9604262434141

FLJ45966 44.9370339275041 45.6948619492056 46.02045129728  
57.165971310746 47.27543600687 51.0071565607171 52.561573697155  
49.239733414453 49.8472708021525 47.3791873993182 46.824299585607  
49.6203214143464

FLJ45974 40.9558083259517 40.4359177791566 41.2365089689635  
42.0102671859606 43.7517118200398 37.9951997351435 54.339958888486  
40.7311497914871 43.4656637536244 47.3791873993182 41.7272875295469  
48.7814131120945

FLJ45983 43.5710871617107 44.2105195734073 44.696023817801  
35.3829784221072 40.6723334103791 33.7818132446042 39.2533668167483  
38.6454098044474 44.1519466943185 40.8970401536578 42.4580504587581  
38.745552403895

FLJ45994 43.844855336215 42.5269793679335 42.3536549114165  
46.3203995372658 40.3452320167286 42.5660695551615 39.2533668167483  
44.7044140979108 41.2870505273664 41.7405682794166 41.9083581529276  
42.7782216342806

FLJ46010 39.7576136507593 37.7384958256497 44.0451487108213  
39.7411455670172 40.4639532172338 41.9543948167375 44.2166118829877  
43.4544762830742 43.5669306063196 41.7405682794166 42.2618615571566  
41.6550823405646

FLJ46020 44.436995101921 43.4396866157171 50.0050760710506  
39.6292788039793 43.6587492470348 40.650742261428 39.3585350448719  
43.2551508830106 46.4164127487052 45.9004543328976 45.2265319826548  
46.4499258373233

FLJ46026 41.4508241771315 38.3322849790657 34.8956628705329  
42.9358255168086 42.1650127805175 40.4359177791566 43.9450023643394  
40.047314525032 36.9060997041453 44.1379638573455 37.7384958256497  
36.064718696392

FLJ46082 34.4896350146096 49.6203214143464 42.157627240486  
36.890925044696 57.6791750431251 42.9695585740813 44.9863726205428  
36.1375121409002 41.3803269429468 36.3612409063792 41.5421429082231  
42.7782216342806

FLJ46109 38.7537364570873 38.5921548841176 37.4642807402741  
35.3457527182429 39.512606833112 37.9430145836712 38.7337086062875  
37.86982638952 34.0382693188794 35.0668743708816 35.7431996538283  
39.6352613956998

FLJ46154 41.8409927585705 36.9994058279362 36.9795961564828  
43.1847628331565 33.5412189543102 35.5158505219112 38.7337086062875  
39.4710743516517 40.4997186069494 34.8137085420423 35.9563099719284  
36.8690774823319

FLJ46156 37.3463875295726 39.0894172982439 43.401782064778  
45.7397504535169 46.1804647841331 39.4953494583071 40.4359177791566

39.2672712041774 45.8325181856483 38.957687788868 42.357910063876  
38.0452862258803  
FLJ46210 37.4554876386402 41.3610369241157 38.1421709520616  
43.3078542962968 39.859345745831 35.2067831864574 38.8417151851134  
37.7612949798895 36.7267557061938 42.785429206422 38.3684202018524  
38.4330755397458  
FLJ46230 40.8681871019812 44.3529919625344 39.1799070031819  
47.9915414951747 42.7107928951766 46.3715909653832 40.6750540874299  
45.3872406432794 39.4762546236449 48.0211752672327 45.1432412071268  
41.7575097298927  
FLJ46257 44.3355304829989 49.83247261979 40.6737160001291  
41.5464765641928 42.7107928951766 38.6414316877471 42.2577689927563  
43.1567024035183 46.4164127487052 44.0409178714232 43.6629145624937  
37.1747156131306  
FLJ46284 39.9697332660833 40.8880530359822 42.2577689927563  
42.5664883002833 38.2496050953547 42.5660695551615 40.0052661202207  
38.956280281655 47.3791873993182 45.0155543555707 39.6403089864678  
46.2625470410195  
FLJ46300 46.441301934328 43.7644428186265 43.7630587657205  
43.9282059368202 49.32293280121 50.0748292497578 44.4639405506967  
49.9332280449549 48.3119523820103 50.5252048155459 43.9450023643394  
45.4799270968969  
FLJ46309 928.2304192226078 647.868022835702 655.389317052689  
923.470702344816 466.454993547103 419.993482471924 835.171475474151  
1595.69503047506 521.874349042344 1453.77801653969 1529.52516575545  
987.427672417105  
FLJ46321 44.1294459089314 39.5573415356949 45.4634652319753  
45.8844325913247 44.9384441371181 41.554942319225 43.2721716572958  
39.2248354955045 39.8873706855774 44.1379638573455 43.1724740315182  
42.0424641526302  
FLJ46347 40.8681871019812 38.8336427948187 39.7411455670172  
37.1894304543751 34.9062568194127 36.8059561571675 39.8695929627783  
39.5466975353131 37.1820543575123 42.1622837416589 40.2649309204478  
39.6352613956998  
FLJ46358 59.5000730792772 39.7835513496873 49.1067959632109  
36.0481934423077 42.269054475455 42.750861693377 40.3302268293707  
40.5158867964016 42.9020321355927 40.2112371512838 45.310660704531  
39.9519547348106  
FLJ46361 40.1145011765998 42.4649374149262 38.0452862258803  
45.390192977585 39.9182914210537 38.8336427948187 43.0930293831497  
44.4031868028216 41.7117861328546 39.4710743516517 42.2455707947223  
41.2870505273664  
FLJ46363 43.1805016690297 45.9266745571724 47.0940613507321  
42.2496337895968 46.7508829977587 38.8336427948187 41.9393838138203  
42.9301944191913 45.6582729799009 47.0055981216687 51.1483696410762  
49.0655215909632  
FLJ46380 41.7397731376692 47.2770121962655 56.1434024065079  
42.1273928203021 44.8897737954573 45.7300501624017 44.6032218589199  
49.7309743973184 45.8325181856483 45.2556760873335 49.8393069675192  
42.1537476443423  
FLJ46481 43.5710871617107 40.7952353240579 46.0727230219512  
46.7577982595088 44.4489662507893 48.8744644207821 44.9863726205428  
44.8997235283254 44.1519466943185 43.1839109702714 45.9104478407175  
48.27609330316

FLJ46836 32.2133093774284 34.8137085420423 37.1643693306382  
36.5393857306744 33.7494761745342 35.8227939208521 35.4623691645629  
35.0510338774593 39.3750969348308 34.6720534245631 32.5482839399637  
44.0451487108213  
FLJ46838 55.6268253440479 43.9421822132391 52.3432130135266  
50.378948785456 41.9842695818285 51.4931742685391 41.706879587091  
46.5717043290731 40.3316153483289 46.6598879466655 48.8088340735921  
44.6484005362281  
FLJ46906 100.403196213407 62.9904770954043 65.3531590366085  
49.1786207920603 60.9710783023013 48.5835484742456 102.913039837094  
68.9522412475296 69.9767092409915 51.4454142248566 62.436851776671  
51.0013344286851  
FLJ90036 40.2543341073001 38.3322849790657 41.3366779545815  
40.0698728584484 38.5512429290626 39.7394181011603 44.0687697278114  
36.2539950294089 45.7452456977857 36.1550293353654 47.0940613507321  
39.2469742642337  
FLJ90086 44.7044140979108 50.7487159427973 50.0748292497578  
36.4564050256915 51.2525124735102 40.244271403831 46.3057385979341  
43.844855336215 49.4786466722535 50.3388505346542 54.4825201506931  
50.8999542937724  
FLJ90231 37.6397652536077 41.4223563635976 44.014441886238  
40.7481155008596 40.9950639693255 42.2114134935898 42.3194600586894  
43.6753843488695 46.581796165231 41.3321861371202 40.4094901248527  
44.2527566343661  
FLJ90650 43.9309845324767 37.4540772310118 39.5450079747895  
40.8681871019812 35.9894133432376 46.6872654833579 40.7910160811527  
37.7612949798895 49.1940901905636 51.0055825931636 46.0905079010237  
47.6040671292013  
FLJ90680 40.7609952437622 42.0709558258414 38.7745734037492  
43.6726153508978 51.7983110178095 45.7300501624017 43.4544762830742  
42.5435283762933 47.1744296124496 38.4187686307607 46.1673159982664  
45.7562276914441  
FLJ90757 44.5282181324797 54.113533179847 51.5292723244077  
58.7338159410728 55.8173045043348 47.6803619768589 48.0283573444179  
54.8412943008635 55.6617952786921 53.4109882045447 47.0940613507321  
44.7401523707775  
FLNA 58.1027665533767 49.7363778831003 47.0940613507321 50.0526763693329  
56.6951078698291 93.6752479496469 40.7910160811527 50.857522488428  
41.7627910693483 94.233414682323 126.620595729562 91.531459931855  
FLNB 644.368005872231 875.139073253298 1250.15619347362 402.412173952792  
477.143510243862 674.270050283701 1012.91803181784 510.946850892298  
946.081492716653 1445.73674428909 1405.20888023653 1310.03307063841  
FLNC 137.818833473709 50.2163892855092 53.3127618245672 76.0975301977715  
62.8270556619309 841.316771679857 41.0381860307445 145.050655626219  
45.9227107476843 1533.38581753491 1557.42399344934 1545.76489731307  
FLOT1 474.155196153863 262.735075993242 215.15351875081 912.757335169259  
268.097966292089 645.114504971255 564.468049419762 225.690879436355  
326.250872625748 393.648308810931 379.473739290565 526.146757036152  
FLOT2 879.708199333257 1762.93413846062 1640.74027400791 1273.52492984569  
1401.46625360427 1081.97502255142 3399.75820494572 2374.1766901821  
2755.23573327276 3761.48462220262 3099.21690111993 2337.7738990994  
FLRT1 40.0557788909923 44.0409178714232 37.6557714476853 35.7674462337723  
39.3667161654772 37.2686490268265 42.0605906240248 41.4508241771315  
37.0126425326534 41.6373771565199 42.2618615571566 41.2437378488025

|         |                  |                  |                  |                  |
|---------|------------------|------------------|------------------|------------------|
| FLRT2   | 52.310270746917  | 47.3536182445315 | 49.8344973836834 | 99.5958921252583 |
|         | 42.6022652963326 | 133.514641336669 | 43.6753843488695 | 46.7980335276155 |
|         | 39.6609238036815 | 81.2992152187529 | 72.1090339831747 | 65.7853960266587 |
| FLRT3   | 74.0913177754682 | 69.2406343120143 | 135.567012693522 | 48.055683217958  |
|         | 194.189674572424 | 96.3976093220249 | 194.469250918013 | 101.272774711455 |
|         | 165.141030604713 | 90.7551885299639 | 100.120990656033 | 78.0586153423713 |
| FLT1    | 39.8662795144616 | 45.6533175604486 | 41.785676764591  | 48.9944486068347 |
|         | 37.5556299264699 | 41.159706131351  | 34.9344532055397 | 42.357910063876  |
|         | 46.1101825640108 | 39.4710743516517 | 39.9070785037411 | 40.1700117452801 |
| FLT3    | 46.8141313516997 | 48.109747794187  | 40.1985790927248 | 53.593974682612  |
|         | 52.2089306840125 | 36.1190722948669 | 41.1507980856436 | 40.5158867964016 |
|         | 40.0403898620771 | 47.1001757441025 | 42.5426057453993 | 47.1060577218993 |
| FLT3LG  | 60.4593810615882 | 67.7189686993694 | 69.6554376880691 |                  |
|         | 66.7750249658122 | 67.9032387662129 | 94.6167194649276 | 65.644767142472  |
|         | 53.2046867327331 | 85.6441969757275 | 80.3915591207869 | 82.1659654020827 |
|         | 70.5322939116406 |                  |                  |                  |
| FLT4    | 41.3848620620968 | 44.7829632472754 | 42.8663534227844 | 46.614092935749  |
|         | 41.0608773166058 | 45.9994850850293 | 43.1563544904505 | 41.1575777497576 |
|         | 43.2761454096265 | 40.2112371512838 | 41.9083581529276 | 41.2437378488025 |
| FLVCR1  | 95.3300728806601 | 67.8999127712557 | 79.6675791471526 |                  |
|         | 61.2213001749372 | 86.8871118411414 | 49.5424425850549 | 123.061728345479 |
|         | 126.620595729562 | 70.2541961995753 | 47.7180816682562 | 53.4088637045445 |
|         | 59.8760452220989 |                  |                  |                  |
| FLVCR2  | 87.5146535320072 | 68.6074516459969 | 95.7820879892969 |                  |
|         | 220.36831243882  | 88.2427413480277 | 63.8740412329753 | 89.2913927776683 |
|         | 90.1430468048409 | 53.0357938671646 | 62.2025996860055 | 56.5402453093703 |
|         | 53.655233033193  |                  |                  |                  |
| FLYWCH1 | 50.7774722329703 | 48.6795178347248 | 52.9736397524094 |                  |
|         | 42.2496337895968 | 46.4343327861696 | 54.7806868394478 | 39.0788811357542 |
|         | 40.7799172560245 | 53.0034632721031 | 59.0216019867146 | 51.2318935933116 |
|         | 56.4873776344986 |                  |                  |                  |
| FLYWCH2 | 86.5564881117807 | 64.9959712888709 | 95.9811314739351 |                  |
|         | 84.0899854321388 | 92.9747592911324 | 112.60230393988  | 111.924999671217 |
|         | 75.656434170689  | 126.500059295217 | 88.9738853594498 | 90.0223113095186 |
|         | 81.7566533443175 |                  |                  |                  |
| FMN2    | 37.55264801907   | 38.4330755397458 | 38.6005272730664 | 36.7892997857376 |
|         | 41.3755760434934 | 40.650742261428  | 44.8643898647322 | 44.2159020605784 |
|         | 41.9635525160083 | 39.6719190054379 | 48.042366934301  | 41.2437378488025 |
| FMNL1   | 48.9906383294199 | 43.9421822132391 | 38.8775560911841 | 85.5959901987745 |
|         | 41.3755760434934 | 41.3553369544097 | 54.6414321010929 | 45.3872406432794 |
|         | 44.8997235283254 | 41.0057887014368 | 42.357910063876  | 39.7411455670172 |
| FMNL2   | 58.2401724760744 | 50.0425298550559 | 46.614092935749  | 67.8233625051884 |
|         | 46.7508829977587 | 56.7429967489965 | 52.9433495155796 | 61.3522631937571 |
|         | 48.8067321016961 | 53.1309801459151 | 56.5402453093703 | 66.2305843819029 |
| FMNL3   | 48.0201377454632 | 46.2625470410195 | 51.4308501933893 | 55.1531662914834 |
|         | 43.8738578522009 | 45.4882438975269 | 44.5375569361112 | 42.0778399888414 |
|         | 41.9635525160083 | 44.7672565800508 | 44.4408504417009 | 42.6758568421347 |
| FMO1    | 148.758736522703 | 41.8848959280916 | 36.9795961564828 | 87.2643859655159 |
|         | 37.5556299264699 | 60.4991141099239 | 46.8613212048981 | 42.2577689927563 |
|         | 44.8997235283254 | 35.6208308220005 | 46.7386599624801 | 40.1700117452801 |
| FMO2    | 69.7442393277127 | 48.9899488302637 | 44.0451487108213 | 45.8844325913247 |
|         | 48.2748123114598 | 142.55778399096  | 53.4921736109774 | 49.3880946790306 |
|         | 48.3119523820103 | 50.7855742231932 | 49.2206713037152 | 49.904979214379  |

|        |                  |                  |                  |                  |
|--------|------------------|------------------|------------------|------------------|
| FMO3   | 73.4611178120841 | 68.0556717366572 | 63.3544794716167 | 55.0604256312495 |
|        | 40.7273974755431 | 95.042308285667  | 41.9393838138203 | 41.1575777497576 |
|        | 41.134180463103  | 46.8954576545929 | 49.4145011642763 | 45.7979032939211 |
| FMO4   | 83.877343750194  | 61.6219790276408 | 50.1860191642359 | 74.8706881113318 |
|        | 57.8039717833131 | 82.1144251872199 | 60.7992483126292 | 68.1311562787361 |
|        | 57.1863195337055 | 79.0249585610565 | 76.2226219333049 | 59.2035499250243 |
| FMO5   | 51.2851682978581 | 70.3629652777935 | 57.7415362494584 | 41.3027031037343 |
|        | 45.6895223823001 | 49.9699131196797 | 44.7255207589606 | 61.5824518349507 |
|        | 53.1249776278067 | 50.7855742231932 | 51.5822637582617 | 54.720204938924  |
| FMO6P  | 45.0985088502363 | 43.826317180678  | 41.2679739649179 | 50.3127977239083 |
|        | 48.4724651632766 | 47.0027453663546 | 43.3262148375525 | 46.7508829977587 |
|        | 51.5888395924843 | 49.2317401696588 | 51.6414075056938 | 48.9906383294199 |
| FMO9P  | 44.7915315085948 | 632.019639546131 | 96.6895594961001 | 42.8235313007746 |
|        | 311.668075784386 | 85.1544284060549 | 777.854349637516 | 277.548019244696 |
|        | 161.326580647514 | 225.056827821165 | 432.945510073269 | 111.166893747402 |
| FMOD   | 177.985573759136 | 69.8505620106065 | 65.1185966859561 | 213.590067519021 |
|        | 54.0126916508417 | 155.435700005184 | 46.1634822993009 | 81.1284422173774 |
|        | 44.1519466943185 | 109.326279686847 | 96.981661155293  | 90.2425981161833 |
| FMR1   | 38.304249186058  | 41.0678614026819 | 41.785676764591  | 42.6913548400127 |
|        | 39.6535880152834 | 38.9378717994178 | 41.253645578517  | 38.3684202018524 |
|        | 40.137818555383  | 38.1042454705119 | 39.0550139257658 | 41.4508241771315 |
| FMR1NB | 39.9697332660833 | 42.3550738181144 | 38.9790184198145 |                  |
|        | 39.3750969348308 | 37.7576900881741 | 41.2567470068038 | 38.6243997507646 |
|        | 39.9576138799997 | 42.6366765186182 | 42.9866214102525 | 40.1742127891824 |
|        | 37.3600014814388 |                  |                  |                  |
| FN1    | 48.3556695727124 | 38.1713217245067 | 42.0960619209699 | 44.550322123994  |
|        | 38.6880635921304 | 44.0804700754786 | 36.8989711187139 | 45.9159813905292 |
|        | 40.8503192605024 | 43.1839109702714 | 42.1516028411593 | 41.5083179498332 |
| FN3K   | 45.0985088502363 | 49.0697565324841 | 46.0727230219512 | 43.6726153508978 |
|        | 43.7517118200398 | 42.9695585740813 | 43.6753843488695 | 38.079222289614  |
|        | 44.4395580493118 | 43.844855336215  | 47.4630625313159 | 42.7782216342806 |
| FN3KRP | 456.023620287811 | 146.432425205891 | 252.347641176529 |                  |
|        | 104.335120306753 | 376.453560620912 | 356.318517117856 | 428.729935028911 |
|        | 184.964039515715 | 285.511923726609 | 238.246319539302 | 198.056931905227 |
|        | 231.859167242606 |                  |                  |                  |
| FNBP1  | 597.191426276771 | 389.131545459708 | 249.195312452368 | 716.434968700383 |
|        | 179.322661675979 | 1652.85734308754 | 239.272650332949 | 408.739953606815 |
|        | 134.265039211045 | 1252.94510628089 | 1139.81870068001 | 1061.61186520958 |
| FNBP1L | 125.503897988367 | 89.4747568145717 | 110.540953771795 |                  |
|        | 43.8495248991589 | 72.2016884438365 | 68.5689807788431 | 129.965747812294 |
|        | 103.133138547093 | 105.376705821141 | 100.076931518374 | 74.5654028199926 |
|        | 101.065203693106 |                  |                  |                  |
| FNBP4  | 453.260719561292 | 913.704049709264 | 940.781370938596 | 542.901822331329 |
|        | 645.114504971255 | 454.185408362583 | 474.379113836506 | 410.402285012885 |
|        | 475.621740714165 | 807.620534408416 | 772.368030410394 | 679.309039810384 |
| FNDC1  | 401.202348352506 | 50.7487159427973 | 44.4652605017595 | 129.592927998658 |
|        | 42.9655396732962 | 41.554942319225  | 38.3346870469391 | 40.2382908228517 |
|        | 37.1506761793345 | 47.4534495228738 | 44.4329005595031 | 41.1868052124344 |
| FNDC3A | 62.8885806455128 | 86.7076796107636 | 68.4720753153522 |                  |
|        | 117.149897485203 | 66.0411740221276 | 87.4623442823265 | 70.6225093592927 |
|        | 62.2982003555312 | 67.0290776715331 | 69.1623287497421 | 72.5993974280876 |
|        | 79.5898953726467 |                  |                  |                  |



|       |                  |                  |                  |                  |
|-------|------------------|------------------|------------------|------------------|
| FNDC4 | 73.6362523983338 | 46.3635803515159 | 50.9933795450314 | 53.8086134112366 |
|       | 45.5809132232681 | 58.4435847520801 | 106.878946016737 | 79.7170181855209 |
|       | 44.5303781239209 | 46.5650556481721 | 49.532546810992  | 42.4607795638552 |
| FNDC5 | 46.5549623118323 | 49.2050538150106 | 40.8420925848403 | 37.1894304543751 |
|       | 57.4163094213712 | 111.240804216088 | 48.0283573444179 | 67.3976855661302 |
|       | 43.2761454096265 | 77.0226403968683 | 59.0537479001842 | 45.1735152121056 |
| FNDC7 | 45.6517320730042 | 45.0905928998779 | 45.3974838013476 | 41.4273122914951 |
|       | 39.859345745831  | 43.3785777889265 | 45.3597029614942 | 40.6171774724171 |
|       | 42.357910063876  | 43.401782064778  | 41.5421429082231 | 38.4330755397458 |
| FNDC8 | 46.0920218698606 | 40.148780650831  | 37.1643693306382 | 40.8681871019812 |
|       | 41.3755760434934 | 40.3357777530419 | 39.7576136507593 | 37.0390589468421 |
|       | 42.357910063876  | 42.0621425894624 | 40.2649309204478 | 42.6758568421347 |
| FNIP1 | 91.0346886951891 | 68.3864191351179 | 81.7117547901526 | 139.847976281228 |
|       | 74.8706881113318 | 84.9601800557888 | 63.6695826053997 | 68.8698243753339 |
|       | 89.2627798562694 | 82.5344501505114 | 79.8701900696361 | 84.8443836237906 |
| FNTA  | 306.487935692954 | 273.849703944739 | 280.117410663595 | 177.425508756002 |
|       | 317.004252313348 | 356.628599887098 | 176.687970262952 | 142.03031230486  |
|       | 230.594000005581 | 192.700843009002 | 190.921576470336 | 327.283431584541 |
| FNTB  | 184.162452344446 | 100.066535982734 | 162.758841068655 | 146.405413944753 |
|       | 125.503897988367 | 132.604567913122 | 166.33117014492  | 103.366147685418 |
|       | 171.770578381558 | 203.979798245524 | 206.559526386642 | 146.61436309209  |
| FOLH1 | 51.2851682978581 | 49.1283590719461 | 47.646800205189  | 46.0228732507872 |
|       | 49.7235523248653 | 46.0905079010237 | 47.209353240759  | 49.085741080241  |
|       | 44.2142581488029 | 46.4944619663072 | 46.8712941728147 | 45.3267183347084 |
| FOLR1 | 57.9679239164609 | 41.9455842688118 | 43.8289240531545 | 41.2575219633134 |
|       | 42.6575535390785 | 41.3553369544097 | 38.6537063231682 | 42.8071549997047 |
|       | 43.9450023643394 | 41.6724739851995 | 39.4410515050885 | 40.9250062559315 |
| FOLR2 | 57.934905173625  | 66.5141009463313 | 76.1493261430901 | 95.5022104475922 |
|       | 67.7155610106537 | 334.438091900861 | 49.1067959632109 | 63.8008894786105 |
|       | 46.7760357462635 | 55.3153799233744 | 46.6442692119997 | 61.6311118308635 |
| FOLR3 | 41.5421429082231 | 44.2105195734073 | 38.6005272730664 | 94.5501397951415 |
|       | 47.2074332636566 | 44.6524308640784 | 78.8250642061439 | 43.4544762830742 |
|       | 39.9444191873552 | 35.2880714952489 | 49.0361180089431 | 38.2350720635382 |
| FOS   | 2354.00192115549 | 5156.59948231705 | 3618.78958408675 | 5218.25814076207 |
|       | 425.60854194674  | 8050.256095383   | 2384.00264993279 | 3343.07293372655 |
|       | 1425.37639004849 | 1405.20888023653 | 1981.03929621057 | 1055.00793806075 |
| FOSB  | 824.946988188872 | 7785.77078492993 | 753.491584605447 | 2440.77408185413 |
|       | 440.282299601096 | 3854.42494497831 | 1105.00321488322 | 9938.5091387622  |
|       | 909.843512894628 | 326.902009704746 | 548.047774435177 | 156.433762355183 |
| FOSL1 | 53.8856501960117 | 80.7198077526005 | 62.0008474085033 | 59.0965219753805 |
|       | 74.5758811681995 | 67.8208976798364 | 83.0647477737971 | 117.612004923867 |
|       | 109.594402843796 | 61.4569050766419 | 41.1638563416981 | 54.0374522273907 |
| FOSL2 | 44.3355304829989 | 47.087835967892  | 48.0191002461099 | 63.9570596163747 |
|       | 40.3452320167286 | 49.5424425850549 | 52.561573697155  | 75.7947206223934 |
|       | 55.3122077514658 | 53.1993028936883 | 51.0492389286271 | 59.0894921452893 |
| FOXA1 | 668.773022931608 | 2551.57660786358 | 1151.25293766167 | 65.524821699432  |
|       | 1114.15989325456 | 169.18132209076  | 1077.94530110976 | 825.558929673308 |
|       | 1813.65521720537 | 615.442484911026 | 651.621028098039 | 576.140066807763 |
| FOXA2 | 39.5676051939342 | 37.2117500129028 | 64.6748464612845 | 39.1350512687938 |
|       | 36.3838763632982 | 37.5887129572848 | 35.7772039808118 | 44.2159020605784 |
|       | 38.8507804383261 | 34.9566647540594 | 40.5084378738092 | 37.4085590601111 |
| FOXA3 | 44.436995101921  | 44.0409178714232 | 39.6451483836089 | 43.5627649099623 |
|       | 72.2665537421443 | 53.8461734834857 | 46.3057385979341 | 45.8669209716694 |
|       | 45.3756389170606 | 42.0621425894624 | 44.7926323492519 | 44.3521099857368 |

FOXB1 37.7726313569706 38.957687788868 40.5386195997545 45.0798408927912  
40.7273974755431 40.9506062495231 38.0598374201407 40.931294690669  
42.1594905198929 40.3235655331796 46.0905079010237 42.1537476443423  
FOXB2 40.4639532172338 42.6939394537076 30.8570661199184 39.7411455670172  
33.8558232866797 33.7818132446042 32.4466419672036 37.7612949798895  
41.5635499110307 38.4187686307607 38.2795150354677 33.939263369489  
FOXC1 372.239177888445 558.855313555287 547.729200972776 361.091144969609  
542.467997217663 625.805967352327 647.868022835702 876.959744461441  
614.603743904512 546.548431253433 626.749986744506 565.411298018845  
FOXC2 52.502055890816 43.1805016690297 49.2041300973417 47.3574589211166  
46.9906120932727 54.1440452292081 46.7100796279384 59.6720198281342  
48.7358147030082 55.7930787690756 46.1673159982664 50.1579724208315  
FOXD1 84.6279355865799 43.683792219729 43.4709415392696 43.6726153508978  
39.1650142708257 42.6575535390785 45.8980298854198 45.4757965005055  
55.9423752286714 35.6208308220005 34.4716904283753 38.5279745308203  
FOXD2 84.1254258487497 56.6146179789815 82.4362183543935 43.4410741327254  
50.6470461863549 46.7800033479223 58.0139597055449 65.9143782252686  
90.3916996175708 53.0357938671646 55.854474649572 43.8575940017119  
FOXD3 36.3649677956953 42.2577689927563 35.4484652445078 42.1273928203021  
39.7568367479301 37.3799542961839 47.7390230243778 46.695848687694  
42.2577689927563 43.401782064778 38.6662194645633 38.1421709520616  
FOXD4 62.0104160416544 66.3026572113793 51.7138050344355 59.987045425047  
53.1100587888055 49.1718303518849 69.3468840908665 64.2174369755376  
84.8694815443111 54.0374522273907 45.5055402477919 50.3118072462443  
FOXD4L1 54.4825201506931 58.6249721386149 45.4865173433646  
43.6726153508978 45.9104478407175 46.6872654833579 48.6395795163502  
48.272324215504 61.7559532093027 43.401782064778 43.5710871617107  
41.2437378488025  
FOXD4L2 42.0778399888414 42.6939394537076 42.2732555030699  
38.2516470858206 37.6013534795056 39.0676956106495 40.0557788909923  
42.381482941987 40.137818555383 40.4488698263442 37.2523512295476  
41.9820792173615  
FOXD4L3 37.55264801907 38.0226905622357 36.6522278218553  
36.3604951341921 43.1252272136667 44.9896851005259 33.9750800030909  
36.6452480995946 34.0382693188794 38.6454098044474 38.745552403895  
39.2469742642337  
FOXE1 46.5549623118323 43.3016395799961 43.917817324545 41.6045220683604  
42.8510579683751 42.9695585740813 41.9741368971524 48.9826868640753  
47.5810366106247 47.3791873993182 44.9081227425497 42.6278608611758  
FOXE3 38.7229679986571 39.1982470626863 41.1742244762318 44.0991023527481  
42.1386542162789 35.6517244402762 40.1235656101329 37.2237132058632  
39.3506426665347 40.8049408996274 38.7337086062875 46.6397391251762  
FOXF1 68.8698243753339 64.5347406608537 49.5424425850549 57.2856683017619  
71.2787833369055 231.685652845234 37.9430145836712 72.4834467838798  
47.0804681460898 98.9657264176664 196.267504470029 113.130838519437  
FOXF2 73.3448790478335 70.5699797830702 90.954592973767 47.0874209746031  
77.6174893940285 56.9320717885002 48.3411413510851 96.4971762611189  
81.552417816742 64.428683021978 88.4594321382477 50.3118072462443  
FOXG1 31.8228237796461 43.0227387991135 40.5734458834617 36.0481934423077  
43.3332476888305 34.6977013306396 34.9344532055397 38.4540849632254  
34.3842972343227 34.1648535095605 41.4508241771315 38.4330755397458  
FOXH1 43.9309845324767 47.5647821785529 56.4779645313958 43.6726153508978  
46.9906120932727 46.1513019317765 40.1235656101329 50.3972033014227  
45.0017158586743 47.1001757441025 47.1477056711335 42.9887069977696

|       |                  |                  |                  |                  |
|-------|------------------|------------------|------------------|------------------|
| FOXI1 | 40.2543341073001 | 40.148780650831  | 43.9450023643394 | 42.2496337895968 |
|       | 43.2484996523549 | 38.1699123824764 | 39.6158343667921 | 42.9301944191913 |
|       | 46.9062313932642 | 42.6366765186182 | 43.4709415392696 | 41.7575097298927 |
| FOXI2 | 41.9407041937973 | 43.1805016690297 | 39.0775870687758 | 47.9915414951747 |
|       | 35.9894133432376 | 43.2805590023412 | 45.4799270968969 | 39.1652965788406 |
|       | 44.8997235283254 | 44.3648993568405 | 47.9942520395434 | 48.1627097465883 |
| FOXJ1 | 36.9060997041453 | 67.6169355376864 | 34.4716904283753 | 39.5050383901884 |
|       | 38.8456942580061 | 38.9378717994178 | 67.5206810636627 | 39.1652965788406 |
|       | 55.2114969675545 | 42.785429206422  | 37.4642807402741 | 46.1592873342534 |
| FOXJ2 | 408.353336724969 | 207.30460556799  | 301.728842562175 | 439.770250139925 |
|       | 298.721050521396 | 447.448900931272 | 339.210875653066 | 310.255767356827 |
|       | 350.796638646601 | 583.915973546284 | 523.679443405512 | 419.271533050938 |
| FOXJ3 | 518.074074000609 | 356.079406408042 | 362.268767190535 | 386.640440174303 |
|       | 343.382663050351 | 377.573838771285 | 379.79657860938  | 627.914461428624 |
|       | 465.430886956232 | 525.16535463798  | 555.044139654886 | 423.608694638779 |
| FOXK1 | 121.8863522969   | 195.221917652149 | 110.431464700539 | 101.065203693106 |
|       | 140.41738844565  | 158.532307373857 | 92.5391033814713 | 85.3681894044625 |
|       | 104.573463811298 | 94.0140258999054 | 95.7263252232278 | 87.4623442823265 |
| FOXK2 | 45.7356815244513 | 47.1332119496722 | 42.6861857638473 | 43.9577120438279 |
|       | 45.3051051665498 | 46.1513019317765 | 47.4439407315335 | 40.2906799807722 |
|       | 48.4614401417022 | 42.5664883002833 | 43.6629145624937 | 42.3214282169749 |
| FOXL1 | 42.0532901689036 | 40.148780650831  | 41.6079958749402 | 46.7577982595088 |
|       | 41.1868052124344 | 41.4508241771315 | 48.4859552186772 | 36.2539950294089 |
|       | 36.197424053556  | 41.0057887014368 | 39.9899430628542 | 43.9541718254769 |
| FOXL2 | 66.8188271427672 | 39.3565586789274 | 36.769073068743  | 39.2336402665402 |
|       | 39.512606833112  | 38.1699123824764 | 43.26160898693   | 51.8347877274018 |
|       | 42.6615964978834 | 39.3275194442012 | 38.4689132737495 | 41.8036925068356 |
| FOXM1 | 93.6717518147993 | 84.8084949516218 | 60.1444334141838 | 49.9672547361866 |
|       | 112.159199477006 | 43.3785777889265 | 173.925818790068 | 113.917429432477 |
|       | 169.367702213351 | 40.3458948319669 | 36.7892997857376 | 37.4554876386402 |
| FOXN1 | 41.8409927585705 | 37.2810767789306 | 37.1643693306382 | 42.5664883002833 |
|       | 40.0599807618105 | 34.6977013306396 | 38.6243997507646 | 44.7044140979108 |
|       | 36.0741672064298 | 35.2880714952489 | 37.3687900733549 | 36.9976231206067 |
| FOXN2 | 217.976796656266 | 147.017279035061 | 184.964039515715 | 503.793770799548 |
|       | 117.260454792593 | 228.845881709556 | 137.081911344143 | 279.782392390288 |
|       | 197.617554897454 | 211.625447303889 | 201.180226922613 | 159.506157112627 |
| FOXN3 | 43.0462952354436 | 37.7384958256497 | 41.7419877611072 | 47.1332119496722 |
|       | 41.467005949568  | 46.574682061365  | 40.5585676679482 | 42.0847226073592 |
|       | 40.2739700860114 | 42.02667925031   | 40.2649309204478 | 43.0930293831497 |
| FOXN4 | 42.3433931248155 | 44.6918600441328 | 37.6557714476853 | 38.745552403895  |
|       | 38.9496515344837 | 37.9003288112261 | 38.6243997507646 | 39.0620487644635 |
|       | 38.4344387289956 | 38.1042454705119 | 40.3452320167286 | 39.0536056496869 |
| FOXO1 | 306.66244801017  | 222.368324930003 | 213.073369426342 | 383.642090672435 |
|       | 172.869292380866 | 351.883708151967 | 274.994470779348 | 166.734730009916 |
|       | 143.251956814524 | 303.189681281366 | 292.47671022688  | 333.648836970147 |
| FOXO3 | 277.588692595406 | 161.25239489071  | 234.615033303459 | 447.709872889701 |
|       | 128.616776019243 | 457.202737754842 | 227.598514023545 | 292.86576686019  |
|       | 241.51647940043  | 390.978292094212 | 454.02808608679  | 324.877187846959 |
| FOXO4 | 52.2236479204029 | 81.1189042503645 | 82.3344892042646 | 43.4410741327254 |
|       | 79.6516904169771 | 177.27613997459  | 87.455991111513  | 60.2691630545162 |
|       | 102.457537266105 | 103.264100180823 | 105.277476070937 | 82.4362183543935 |
| FOXP1 | 39.9697332660833 | 46.6314009405034 | 43.401782064778  | 40.646702696033  |
|       | 39.7568367479301 | 41.2098211956301 | 45.4040191352687 | 44.293922970134  |
|       | 44.1258877591681 | 52.1788489555942 | 52.4111687156893 | 49.7336769474446 |

|         |                  |                  |                  |                  |
|---------|------------------|------------------|------------------|------------------|
| FOXP2   | 41.3785995857154 | 44.3529919625344 | 46.614092935749  | 43.074472921841  |
|         | 38.4135023167287 | 61.3973540098375 | 42.629412460409  | 38.9074189954657 |
|         | 40.0870341983328 | 37.920964499903  | 42.8263096141654 | 46.9867599298218 |
| FOXP3   | 34.0467249875782 | 35.6434124419782 | 39.991353369336  | 36.264823544143  |
|         | 38.3561682218911 | 34.8956628705329 | 37.4772922422734 | 37.33030683349   |
|         | 36.8127605061228 | 39.4710743516517 | 34.8383995317036 | 45.3763275588341 |
| FOXP4   | 58.5759178381027 | 49.4982025424177 | 43.7630587657205 | 49.260242314197  |
|         | 44.2120774064277 | 44.0399598874356 | 43.3832826368789 | 47.9363875418976 |
|         | 48.1174861108648 | 42.1622837416589 | 45.5055402477919 | 46.8129509799753 |
| FOXQ1   | 393.209708455013 | 3707.73750609316 | 2903.00880209344 | 147.689479458785 |
|         | 4036.89580181979 | 554.163106145921 | 3153.71394627237 | 2009.75680599899 |
|         | 3055.1209535841  | 4368.11345948444 | 2621.65272077828 | 2039.89728774097 |
| FOXR1   | 38.6454098044474 | 40.2093230376545 | 42.0136658108872 | 45.2606665758581 |
|         | 42.2455707947223 | 41.6178506967511 | 40.9811982338594 | 41.2098211956301 |
|         | 40.7460990419215 | 38.5782171290591 | 39.6894175734463 | 43.0930293831497 |
| FOXR2   | 38.304249186058  | 36.5219488315447 | 35.2101597814352 | 34.7266486944713 |
|         | 38.6454098044474 | 36.2015763253919 | 39.3585350448719 | 37.86982638952   |
|         | 38.5252456306656 | 34.4875013487777 | 37.9946685306274 | 40.6614700944853 |
| FOXRED1 | 231.859167242606 | 159.268245287939 | 177.757247913754 |                  |
|         | 142.309369995384 | 222.696947669812 | 144.593933058291 | 262.024495926094 |
|         | 293.151956467056 | 154.287396750021 | 204.229798794441 | 175.009248614892 |
|         | 116.874313720275 |                  |                  |                  |
| FOXRED2 | 86.3793067659925 | 74.0831311663524 | 72.7071934110997 |                  |
|         | 59.0965219753805 | 111.304424389891 | 75.6382797289563 | 103.707931766117 |
|         | 123.219313750907 | 76.3790849853724 | 83.8113149043718 | 89.737418965763  |
|         | 64.9114266867808 |                  |                  |                  |
| FOXSI   | 48.2910530887214 | 46.8954576545929 | 44.8872784170036 | 38.4208429103799 |
|         | 40.9950639693255 | 40.040778349137  | 39.4600924554505 | 33.1477313087177 |
|         | 36.7267557061938 | 41.9666541498638 | 41.8168470823451 | 36.7762265039864 |
| FPGS    | 40.4639532172338 | 42.8542642792862 | 38.7429005059745 | 41.1886975241176 |
|         | 39.9697332660833 | 41.9918605927928 | 44.6032218589199 | 42.8036731479932 |
|         | 43.8159843786397 | 40.6573239942138 | 40.9696219937838 | 44.7401523707775 |
| FPGT    | 43.0001432913058 | 45.0115870036541 | 36.8730514568925 | 37.1894304543751 |
|         | 38.0598374201407 | 39.132725377815  | 37.6036146841933 | 39.5466975353131 |
|         | 40.2274522635576 | 37.8217989841918 | 43.6629145624937 | 46.2625470410195 |
| FPR1    | 57.1046180136491 | 76.861722336069  | 95.0026207727863 | 2581.34849558524 |
|         | 62.9553576299033 | 256.116479208201 | 303.93332785291  | 64.120219344545  |
|         | 42.9020321355927 | 42.785429206422  | 42.170702295259  | 66.9239565096247 |
| FPR2    | 41.8409927585705 | 44.4758281923423 | 56.9133235865341 | 1524.01520893763 |
|         | 55.6991707857987 | 61.2387559102636 | 131.645714321903 | 42.7431359850339 |
|         | 40.2274522635576 | 37.2686490268265 | 38.4689132737495 | 41.7575097298927 |
| FPR3    | 205.480081236149 | 83.7739049195868 | 55.6865353018811 | 449.059703234741 |
|         | 57.9161791762225 | 90.99086730704   | 70.5534237141767 | 107.427186954956 |
|         | 48.3119523820103 | 49.0841460667818 | 45.1432412071268 | 70.8546350449171 |
| FRAG1   | 88.9589979655541 | 109.943883439481 | 145.607100979838 | 56.4578213622965 |
|         | 141.055218279065 | 68.1969125201241 | 100.891869710611 | 93.0474674148534 |
|         | 140.01041112896  | 157.020685801527 | 132.851109034738 | 128.032613585193 |
| FRAP1   | 294.155188719236 | 277.878824242495 | 295.856741468603 | 253.605641311356 |
|         | 356.079406408042 | 205.650076927315 | 265.570814613305 | 474.379113836506 |
|         | 238.120731107691 | 201.027801320306 | 244.070778149931 | 236.661422875826 |
| FRAS1   | 65.8703820581684 | 110.626479311082 | 48.2492481167112 | 43.2504382247503 |
|         | 53.2173939357349 | 45.4882438975269 | 61.4267636950869 | 71.136135376296  |
|         | 72.7934987008399 | 43.9694307523562 | 47.3935171631611 | 41.1868052124344 |

|        |                  |                  |                  |                  |
|--------|------------------|------------------|------------------|------------------|
| FRAT1  | 46.68364047986   | 64.4357814748414 | 53.7316344826448 | 68.1992221684165 |
|        | 54.8830461467967 | 52.6747142992864 | 59.8273072817267 | 48.7039705048129 |
|        | 56.7635847444447 | 57.3562426592112 | 50.2016912396771 | 46.0106098064475 |
| FRAT2  | 240.6614822416   | 700.010354583503 | 171.5709313654   | 366.615979176657 |
|        | 283.161835288074 | 165.606015336587 | 486.265784810787 | 196.247893540766 |
|        | 313.115027781064 | 198.190904631121 | 204.477547372897 | 172.540737848092 |
| FREM1  | 38.385865183581  | 57.4054069675016 | 37.8386378737561 | 34.8137085420423 |
|        | 34.2638875325204 | 60.4065050472082 | 42.4939802311136 | 36.2539950294089 |
|        | 36.9060997041453 | 51.1169368198437 | 47.4630625313159 | 35.3525469364579 |
| FREM2  | 40.9558083259517 | 54.4793574349739 | 43.0602678767669 | 42.1622837416589 |
|        | 50.9643363406241 | 41.7256940298128 | 62.7488501311848 | 48.7039705048129 |
|        | 46.7760357462635 | 45.9426591985894 | 46.7902798502321 | 40.8681871019812 |
| FREM3  | 40.4639532172338 | 43.5182502375207 | 41.8751578329365 | 40.5484717678957 |
|        | 42.9090346219023 | 47.6803619768589 | 44.6032218589199 | 39.3709357615493 |
|        | 44.8997235283254 | 42.5664883002833 | 42.911855821602  | 42.8864415494484 |
| FREQ   | 124.37984507038  | 184.340249262704 | 78.7103847663605 | 120.068630086702 |
|        | 184.162452344446 | 710.579735673002 | 156.061711961514 | 83.9236799134394 |
|        | 69.4677195088043 | 386.271174243357 | 358.30596676183  | 254.756894822368 |
| FRG1   | 105.247736284747 | 111.72494102259  | 123.597489107285 | 192.264432082651 |
|        | 98.6553805168141 | 127.701556328274 | 151.266092912661 | 176.492987902471 |
|        | 132.205423909251 | 168.366869831376 | 138.032032026715 | 135.592113666246 |
| FRG2   | 40.2543341073001 | 40.3946758935842 | 35.3227485563945 | 39.3455642782085 |
|        | 37.1935273352159 | 39.066284740632  | 37.7555770011351 | 38.1835938174625 |
|        | 35.9096438988171 | 40.1179210534118 | 37.2892641289258 | 38.0452862258803 |
| FRG2B  | 39.2076937845359 | 39.9697332660833 | 39.5118967430322 | 36.890925044696  |
|        | 39.9088079891223 | 43.3269087731399 | 42.4939802311136 | 39.1652965788406 |
|        | 40.2739700860114 | 41.4659679379482 | 41.6657053704762 | 41.8200132437731 |
| FRK    | 63.6767189846426 | 43.0227387991135 | 47.646800205189  | 37.0732977341185 |
|        | 35.9058393060637 | 40.9506062495231 | 41.253645578517  | 43.6434576713809 |
|        | 47.0804681460898 | 53.0357938671646 | 57.8991270166934 | 51.4308501933893 |
| FRMD1  | 40.5654775358427 | 39.9697332660833 | 39.4710743516517 | 33.3231576795423 |
|        | 39.3667161654772 | 42.5660695551615 | 36.634024014558  | 35.3608605269276 |
|        | 37.5469247328848 | 39.5637454855233 | 37.1059647239814 | 36.064718696392  |
| FRMD3  | 57.7877627794725 | 73.1640951333742 | 68.1780382173625 | 52.3004056941891 |
|        | 49.9493230064613 | 113.716666562787 | 55.5578334877425 | 61.6839343510302 |
|        | 49.1940901905636 | 107.610858427836 | 162.000275136397 | 71.2491135258076 |
| FRMD4A | 89.2913927776683 | 116.295564219236 | 107.413918714848 |                  |
|        | 115.63300104804  | 78.1275793755619 | 95.2367177680328 | 94.8766888888828 |
|        | 65.5820437889838 | 83.105117076029  | 121.633811243877 | 103.199200862158 |
|        | 97.7140868175135 |                  |                  |                  |
| FRMD4B | 42.7150227340364 | 41.7656868106485 | 37.8990009552441 |                  |
|        | 40.6907735219854 | 38.8775560911841 | 43.0860383229288 | 46.6324636890843 |
|        | 39.8048943625718 | 39.8984580390722 | 39.1233194644391 | 39.0905363288848 |
|        | 41.7575097298927 |                  |                  |                  |
| FRMD5  | 44.7044140979108 | 42.466333667839  | 41.7419877611072 | 45.9441733841041 |
|        | 40.4166536885831 | 43.5752393599169 | 53.4921736109774 | 48.6441988290952 |
|        | 44.3440839686558 | 43.128936937037  | 41.9083581529276 | 38.8132170743603 |
| FRMD6  | 217.721787448311 | 201.145927216439 | 254.239142284878 | 111.227016020927 |
|        | 164.547318765586 | 190.487609390723 | 79.0741890905715 | 94.2678678253657 |
|        | 206.481424743576 | 207.18510695093  | 184.377148097206 | 184.50283792606  |
| FRMD7  | 34.4021554788966 | 37.10170285405   | 36.5474283500601 | 38.8495095797881 |
|        | 38.3561682218911 | 38.6414316877471 | 32.1218888714537 | 37.2237132058632 |
|        | 40.0403898620771 | 36.1550293353654 | 42.7275315121163 | 42.4607795638552 |

FRMPD1 46.0920218698606 50.6229884142872 47.3861758958576  
42.4580504587581 48.5000946421718 40.3357777530419 51.3064929551674  
47.5950227477807 42.9020321355927 45.7911932481722 51.6414075056938  
43.4709415392696  
FRMPD2 41.2693383984535 41.9363480239047 40.0421053671784  
42.264777344908 40.3124262005404 42.5089442785482 43.3744503319109  
41.7808320192909 39.5377896745682 40.8434758668556 39.7563187199181  
42.9887069977696  
FRMPD2L1 36.9721666683086 40.8420925848403 40.047314525032  
39.7411455670172 36.3867274293191 37.3356865956886 35.1714932603619  
38.079222289614 40.5491080069964 37.4656588382066 39.3895791800635  
39.901614985832  
FRMPD2L2 42.2610433929745 41.4178149669293 39.5930464310561  
42.2941793046964 40.7176735294868 43.3367435704657 43.2585069008027  
41.3082479425828 44.0137388752186 41.8613406887824 41.1349567921107  
40.5243798943351  
FRMPD3 55.1306642449627 40.6380495994768 38.6005272730664  
41.8778873678551 42.7982502551634 41.3553369544097 39.1539892144371  
45.0972184964705 42.357910063876 44.0409178714232 38.4689132737495  
44.8372404608604  
FRMPD4 45.2875173643252 43.5873188565519 51.4308501933893  
46.4555908533915 44.0451487108213 46.3715909653832 53.0277416531043  
42.6450179841129 44.0519245668737 45.5776159432079 48.6767028205398  
48.6037684272115  
FRRS1 44.5282181324797 50.6774883370457 48.8100349749783 53.3967242431461  
44.5092684716474 48.7070804960074 45.8980298854198 49.8344973836834  
52.6192478923607 44.3303034026662 46.3370338074996 46.7182294568603  
FRS2 41.4508241771315 43.4681646416585 43.0971787292711 41.9635525160083  
41.3440240757217 42.5089442785482 38.2307941336596 45.8669209716694  
46.1579366516298 43.2346122959037 44.9056256433399 40.1700117452801  
FRS3 98.1495112518979 99.571118823509 128.680405667403 66.5921967967793  
87.2282539094452 89.9789975503195 97.0155195562193 60.5571721986885  
82.4467808843629 73.8313212063649 111.760213205992 88.2604063995148  
FRY 46.5549623118323 53.1278271804774 48.9944486068347 43.4410741327254  
46.7508829977587 52.6226745117396 43.6753843488695 45.1714698794331  
49.7336769474446 59.8130420783374 57.2008272301399 57.6860752168769  
FRYL 66.3845271542459 69.4820178305563 96.2490896573253 93.4042243540384  
67.0738693349694 66.4015820814547 72.3070624532091 81.528980339501  
82.1509530759594 101.277664841914 92.8089247593564 92.5011103881887  
FRZB 217.976796656266 129.081183929988 116.184007615285 164.612971085488  
86.8871118411414 124.032371632524 41.0381860307445 121.729442469889  
52.5772854102326 98.501431740607 81.4702220063796 56.361708620372  
FSBP 40.8681871019812 47.5647821785529 44.4311655729487 49.3654837541353  
45.6895223823001 44.0804700754786 41.253645578517 40.931294690669  
47.798305839406 45.0155543555707 42.0750889188255 43.5738557773903  
FSCB 41.483412492426 39.9697332660833 39.3709357615493 43.0016969050339  
41.9397336249742 37.4782441311626 40.7910160811527 38.132587347852  
41.6616444147804 41.7405682794166 39.0550139257658 41.5536168238478  
FSCN1 1712.55038816005 2191.09005731751 1839.09068171097 950.740991182127  
3114.05035137552 986.40790007743 714.990611155096 505.018127833201  
3575.78813099057 672.515393219419 771.554891868456 1313.92053019421  
FSCN2 47.7779356299965 44.2630383225933 38.0452862258803 39.5637454855233  
42.9090346219023 40.5805725503899 45.4164642922183 47.3172462673426  
39.6413313949444 44.2580151149956 42.911855821602 44.6484005362281

FSCN3 41.5421429082231 39.0102066700839 41.0356368374708 43.9282059368202  
37.5556299264699 46.574682061365 41.3594868055879 42.357910063876  
44.7058233759912 45.5776159432079 43.1931731665131 39.0536056496869  
FSD1 45.162170179003 43.6615266096323 44.0215298143291 43.0001432913058  
71.8706847571669 43.7630587657205 55.5086026637973 64.6748464612845  
45.5265270192861 42.3606390470387 41.0516468406389 43.8336862998829  
FSD1CL 41.7397731376692 42.9358255168086 41.528370959196  
43.074472921841 40.7779767565889 40.5281496800812 43.0930293831497  
36.0306975524309 37.9273653326866 37.4302011516587 36.5359455830388  
42.4607795638552  
FSD1L 44.2350046179299 46.0713306971594 43.0971787292711 44.265834798964  
41.7929491793697 42.357910063876 48.6395795163502 44.2159020605784  
41.1742244762318 40.6022003765153 37.9946685306274 39.0536056496869  
FSD2 41.4508241771315 41.8073910693411 39.991353369336 36.1562979552173  
43.5544347011646 33.3470732872681 42.0605906240248 46.0633179231318  
33.4698406117406 35.7202909649682 39.9070785037411 31.7413650507468  
FSHB 39.5676051939342 38.7578265341627 39.4710743516517 40.3691324547049  
41.2740822675592 39.132725377815 36.7892997857376 39.3709357615493  
34.8099089553046 38.1421709520616 38.745552403895 37.8490162439785  
FSHR 42.3620028137457 42.7775752471711 42.2577689927563 42.6913548400127  
38.6454098044474 41.7256940298128 40.5585676679482 38.3684202018524  
40.3662560853635 40.5571841955033 42.4580504587581 38.5279745308203  
FSIP1 40.8681871019812 48.109747794187 45.2313723727673 41.8778873678551  
44.2607789091176 48.5835484742456 45.3597029614942 37.2237132058632  
46.581796165231 59.5785089386245 54.8532558909227 75.5751205142867  
FSIP2 41.3387790895716 45.2556760873335 48.9944486068347 44.7980740332174  
43.004943518025 44.9896851005259 48.1747307200218 45.5581356216957  
45.1899271235974 38.2069499294002 41.6336636285875 43.8575940017119  
FST 103.695493532556 583.421166842011 64.1442136854628 80.3204519680998  
177.515053183327 184.105396912056 95.5117928427637 289.909646207746  
175.165302282522 114.190951215203 100.120990656033 124.280024888206  
FSTL1 442.080188140864 139.191263237202 177.261319004133 227.243009473121  
225.960701908311 622.964590694346 112.281286038716 162.833785414988  
78.055431384988 285.187681119318 286.538414026118 540.913422859469  
FSTL3 113.866742186841 64.5347406608537 103.316970096472 81.1189042503645  
103.423003544792 146.931674964658 48.1747307200218 56.9299697426319  
61.6839343510302 70.0907269565408 73.7873098190297 160.100408020768  
FSTL4 40.9558083259517 45.2098033805679 44.8872784170036 41.0219290963778  
48.1473938886239 40.8634043028528 39.4916414839923 41.0381860307445  
44.619512785899 51.7343702554597 49.4593570700221 47.3172462673426  
FSTL5 41.2424637338424 37.5469247328848 38.8775560911841 36.890925044696  
34.806104801006 28.6786952763294 32.9962272670005 35.4526946152955  
312.795596385258 35.4990901121893 35.6970528713709 32.7800533388945  
FTCD 38.5007204246293 41.4223563635976 37.2291018661279 40.2455972565968  
49.3984571719129 38.4330755397458 35.0305278582179 40.2819379659218  
35.2604260353347 38.2069499294002 43.6294818685075 40.8681871019812  
FTH1 599.670771796585 266.381531918483 344.578407722941 1658.86829668934  
398.049525642349 704.15545332905 710.831173303701 447.709872889701  
305.554059609771 511.164722585602 548.387793019855 465.595459259015  
FTHL11 384.522115820048 156.311985997533 199.57367025082  
909.843512894628 237.974766880957 320.684862879691 313.046160403661  
306.487935692954 237.864776225441 223.562130663956 215.869541768982  
275.673080691335

FTHL12 854.712488657987 397.745727767552 522.125691279772  
 2061.66570137425 674.270050283701 901.793120584383 879.708199333257  
 684.238999553691 480.660242705293 406.964801954621 528.512401493184  
 608.579654909865  
 FTHL17 36.7356360093603 36.5219488315447 37.0642268327439  
 39.7411455670172 39.0564222526273 41.554942319225 33.5578650644246  
 40.3357777530419 48.8067321016961 34.6720534245631 39.9070785037411  
 41.6550823405646  
 FTHL2 171.770578381558 96.2280884890067 118.155986485411 382.190644764853  
 126.360723656793 175.441884261362 157.219840854561 137.658868649032  
 109.714619050525 107.325456368022 124.791747507205 132.364260893831  
 FTHL3P 308.728126648231 135.29225447532 176.492987902471  
 793.570993808328 214.127390534906 357.839241226513 250.41086379231  
 252.870708814507 163.20801480093 175.441884261362 156.822939275312  
 233.96534264787  
 FTHL7 5932.92478996609 3399.75820494572 4200.38495514552 10483.5643876539  
 4381.51418239047 5047.91205452316 5895.03230740197 3428.74022048394  
 3707.73750609316 2354.00192115549 2424.0414102425 3099.21690111993  
 FTHL8 483.882804472844 243.952697457779 267.170081805168 1151.25293766167  
 368.246708866999 492.519023728038 426.933064567744 380.015934356432  
 307.264133974364 219.388293203286 250.41086379231 338.053116855608  
 FTL 18219.5845257111 8937.3846214861 10351.5373412096 16661.6081002448  
 14226.3743910711 14226.3743910711 12456.731302703 8259.38594893529  
 9582.11974031559 7127.13565491501 7562.42822724655 9060.10165509099  
 FTMT 41.7397731376692 34.5023764006976 38.8775560911841 36.3604951341921  
 40.8873907150245 37.8102105794655 38.7337086062875 40.831207953647  
 34.9428206949566 43.2988017098387 38.6662194645633 37.3600014814388  
 FTO 118.05982513603 90.7255100542123 165.775214685061 89.0203733091224  
 95.6182216943758 155.378768637562 118.483499958227 103.199200862158  
 100.076931518374 135.706144105357 140.853812988562 131.779333469955  
 FTSJ1 81.638176606529 94.3773551105819 82.8205269728224 74.3292739001607  
 111.742106978992 80.4404044229341 100.802977734227 71.8314470868658  
 90.8109585999257 60.9446532180211 65.1496567852393 58.9373124129662  
 FTSJ2 45.1569741609597 48.0296332183129 52.1636737767351 47.0874209746031  
 62.5535250577176 47.2009420656854 49.0441221285767 48.4670130605028  
 50.6346949248834 42.3606390470387 46.4753015651202 50.6141827957642  
 FTSJ3 41.1523487516364 49.4067286971348 57.7415362494584 40.5484717678957  
 51.0107745412152 52.9482338979681 45.6042625176633 45.8669209716694  
 49.2879849674517 53.5498255316009 51.9302027391447 49.0655215909632  
 FTSJD1 117.612004923867 127.701556328274 104.557637353314  
 97.6774247176874 97.1271615802556 93.1067450332473 92.3034609409756  
 120.850874262069 129.538159906075 79.1074681877535 91.8414653633828  
 104.089998273812  
 FUBP1 56.921728372453 55.1766423847208 66.8632294055679 54.2886483704949  
 68.9038222450855 51.6053353177789 61.6544855697851 95.9391851122771  
 46.1101825640108 61.1851254827343 56.9320717885002 73.408861359425  
 FUBP3 197.660480001139 198.54718783437 133.720493104769 152.996027678733  
 187.21383075601 223.562130663956 152.898843315675 129.965747812294  
 142.1823033942 126.218285718433 192.085063824686 177.379924616924  
 FUCA1 272.36028618845 776.670493028756 413.067407579649 397.633328080609  
 351.439404852971 223.669853276931 266.381531918483 467.645011859047  
 275.975192937951 444.937258895152 450.271658272512 802.036670929858



|        |                  |                  |                  |                  |
|--------|------------------|------------------|------------------|------------------|
| FUCA2  | 125.713216265584 | 141.611097024526 | 110.684033203048 | 128.860357469791 |
|        | 128.657014567195 | 94.7604013126314 | 124.687212034276 | 120.980558571109 |
|        | 90.9570747667407 | 78.0020909283414 | 88.9038123445083 | 112.944044862693 |
| FUK    | 132.117013391364 | 149.055511050346 | 264.975481501401 | 115.468303687641 |
|        | 151.175959542368 | 83.2083460752986 | 136.883475451494 | 210.282066967005 |
|        | 167.799243454967 | 252.649651285136 | 165.598854278557 | 152.72007888133  |
| FUNDC1 | 89.1632548302738 | 128.005663945917 | 135.604088792552 |                  |
|        | 78.1583955490018 | 80.9160262677505 | 84.7113556042844 | 114.230358276599 |
|        | 124.051109959228 | 176.594203350958 | 119.747995520476 | 105.052418151358 |
|        | 147.902378647394 |                  |                  |                  |
| FUNDC2 | 42.1537476443423 | 43.4396866157171 | 42.4580504587581 |                  |
|        | 44.6905691366696 | 46.5557478175976 | 60.7488007939604 | 38.2933870238743 |
|        | 40.831207953647  | 46.2027193115397 | 47.0055981216687 | 51.3103617600342 |
|        | 48.8670821164567 |                  |                  |                  |
| FURIN  | 128.436305192918 | 106.951862149262 | 81.4931910857436 | 177.067668324062 |
|        | 79.1822591641672 | 83.2083460752986 | 102.380096190518 | 130.058147569795 |
|        | 91.6328359149182 | 87.3815040456105 | 76.4389426517528 | 80.3500323413132 |
| FUS    | 103.010279797396 | 66.3026572113793 | 64.0162246399972 | 77.2218991550552 |
|        | 65.3933030211114 | 67.0290776715331 | 69.4677195088043 | 76.3509533017572 |
|        | 58.4200819624972 | 83.6524523974491 | 84.8084949516218 | 58.9069025298754 |
| FUSIP1 | 51.1347974668251 | 76.9303701148105 | 73.8949517122417 |                  |
|        | 66.1273501707704 | 86.3793067659925 | 63.6894484284172 | 84.4821163646146 |
|        | 59.6720198281342 | 59.4714233251027 | 51.1621379498014 | 56.6379362051304 |
|        | 64.5845827915699 |                  |                  |                  |
| FUT1   | 37.55264801907   | 38.8336427948187 | 36.6522278218553 | 41.5464765641928 |
|        | 41.5668884168669 | 37.4782441311626 | 43.6753843488695 | 40.2382908228517 |
|        | 41.1742244762318 | 42.785429206422  | 36.5359455830388 | 43.9541718254769 |
| FUT10  | 48.1125722136997 | 45.7979032939211 | 45.1569741609597 | 43.1847628331565 |
|        | 43.3332476888305 | 44.8872784170036 | 42.4493032770053 | 47.4740726032707 |
|        | 41.0476065156912 | 47.2299678280724 | 45.0589947942306 | 48.3648494350286 |
| FUT11  | 37.4554876386402 | 45.0115870036541 | 42.2577689927563 | 30.9241129241985 |
|        | 44.4489662507893 | 47.3791873993182 | 38.1793598983615 | 32.354741557861  |
|        | 47.27543600687   | 37.6383530120621 | 40.6373400186325 | 39.7411455670172 |
| FUT2   | 112.644426507762 | 39.2907645923217 | 39.0775870687758 | 37.4223289687135 |
|        | 36.8059561571675 | 38.3418933808844 | 64.5722284870633 | 78.0020909283414 |
|        | 140.648209468568 | 35.7202909649682 | 51.3861659123096 | 42.2577689927563 |
| FUT3   | 243.27954361539  | 114.056623754207 | 72.0243286940589 | 48.856176220627  |
|        | 163.234938974457 | 48.5835484742456 | 124.112216491975 | 205.991317474325 |
|        | 351.700618429121 | 45.7911932481722 | 47.4630625313159 | 47.6938628797168 |
| FUT4   | 126.682296930289 | 52.0268699306396 | 50.6987358483181 | 130.908206625954 |
|        | 44.9936360641969 | 63.4610447573417 | 101.065203693106 | 110.983311402531 |
|        | 75.0704619826557 | 75.5861488664745 | 88.7461361855771 | 61.1022920882065 |
| FUT5   | 46.6348258763289 | 41.3610369241157 | 42.157627240486  | 43.8002456102021 |
|        | 42.1650127805175 | 39.2985791324641 | 40.9157352260901 | 40.047314525032  |
|        | 41.5635499110307 | 45.9004543328976 | 49.1067959632109 | 46.0633179231318 |
| FUT6   | 71.7997882389171 | 66.9524703393018 | 60.4809187893259 | 74.4365426051588 |
|        | 54.802736966312  | 47.1477056711335 | 79.9597944271831 | 89.7448801760766 |
|        | 61.3216070188812 | 82.966263655525  | 75.0704619826557 | 76.6094442444074 |
| FUT7   | 46.3390850717989 | 43.0971787292711 | 38.1421709520616 | 43.8002456102021 |
|        | 44.9936360641969 | 44.6524308640784 | 37.0564573649223 | 38.6454098044474 |
|        | 42.6366765186182 | 39.7835513496873 | 38.6662194645633 | 43.3744503319109 |
| FUT8   | 80.8285585008048 | 49.015238049903  | 62.7605715573218 | 89.7554896946341 |
|        | 45.0693869004277 | 54.4753345912615 | 47.1345949868029 | 57.1863195337055 |
|        | 61.2510119532409 | 54.0374522273907 | 59.0047891751497 | 54.6235981131919 |

|        |                  |                  |                  |                  |
|--------|------------------|------------------|------------------|------------------|
| FUT9   | 40.5654775358427 | 37.5469247328848 | 35.2101597814352 | 41.8778873678551 |
|        | 41.7419877611072 | 36.9060997041453 | 38.5066108855005 | 43.2890595186135 |
|        | 43.0930293831497 | 40.4518431978241 | 43.8002456102021 | 42.9887069977696 |
| FUZ    | 51.1740855632044 | 61.6878176260761 | 57.2960245538881 | 53.0284011078097 |
|        | 83.0497574039035 | 58.0910843932181 | 68.5725871332774 | 57.7805922926828 |
|        | 69.8899273527731 | 73.9732553364283 | 66.8842530423095 | 50.5511827666954 |
| FVT1   | 275.811139268285 | 235.593721159442 | 192.700843009002 | 260.964562714558 |
|        | 114.740276704399 | 263.937966521917 | 171.853856533964 | 144.578232267116 |
|        | 213.204385896543 | 288.065258507995 | 245.127632785841 | 343.262403838579 |
| FXC1   | 88.0979122006842 | 110.837476359817 | 112.60230393988  | 146.268519891864 |
|        | 107.770004093887 | 126.911056987607 | 121.441763452598 | 103.734064904898 |
|        | 107.538934056558 | 96.6833301748676 | 91.6826894933058 | 109.594402843796 |
| FXN    | 48.2549905619119 | 61.8124171056747 | 70.2141759405882 | 47.3574589211166 |
|        | 59.526516100518  | 57.4777075615651 | 60.0517078759277 | 51.9447450229707 |
|        | 70.5171002055327 | 85.6038071277319 | 70.2215218476683 | 57.2008272301399 |
| FXR1   | 160.853643241489 | 145.607100979838 | 153.901083585889 | 159.248015095017 |
|        | 202.01900875263  | 251.027270265657 | 160.203825526096 | 171.468580016846 |
|        | 164.642060754649 | 165.797721197832 | 152.555556133364 | 224.109805046747 |
| FXR2   | 102.443884864631 | 108.083751469991 | 88.0368652545541 | 98.9560329133205 |
|        | 94.8408264309872 | 86.6246917308185 | 104.341160312305 | 112.122619608668 |
|        | 99.0815700721606 | 123.608921653229 | 116.993403211005 | 86.3888090084564 |
| FXYD1  | 41.8792703207442 | 41.9397336249742 | 43.1931731665131 | 45.4977402232805 |
|        | 41.0608773166058 | 140.961217055867 | 42.1607322031054 | 44.6708453138373 |
|        | 42.357910063876  | 66.1541420734416 | 66.7256057011273 | 50.2163892855092 |
| FXYD2  | 42.5478935075651 | 41.2598458726002 | 42.0233072093141 | 80.4007868743886 |
|        | 40.2449343247539 | 42.1046072075724 | 42.5750559787101 | 41.8767957887205 |
|        | 42.6366765186182 | 39.7390725304842 | 40.6857324478814 | 42.1860813954352 |
| FXYD3  | 46.6781384361786 | 179.522572239758 | 344.737170118121 | 41.253645578517  |
|        | 95.0604882262201 | 53.4921736109774 | 80.4007868743886 | 76.5444845463963 |
|        | 190.592556065939 | 103.521926015878 | 85.0342118119783 | 107.232979387172 |
| FXYD4  | 44.0328992213727 | 52.9603588177082 | 38.8775560911841 | 37.8442841690502 |
|        | 55.0031529299037 | 38.4330755397458 | 149.978825406418 | 253.462941029119 |
|        | 71.6573554353691 | 38.528621456378  | 44.2142581488029 | 47.8931773060789 |
| FXYD5  | 349.589955244523 | 199.858233616116 | 299.665413950641 | 639.778130093087 |
|        | 167.626012561905 | 268.54298415337  | 539.471011648536 | 366.515210930763 |
|        | 336.795797976236 | 350.917244438732 | 348.65230953701  | 378.12777235743  |
| FXYD6  | 102.770627167954 | 53.3683962805281 | 51.8122261766744 | 119.591054636527 |
|        | 47.6884372645373 | 769.685677484067 | 47.7390230243778 | 52.5098795466615 |
|        | 40.4997186069494 | 293.410413883219 | 259.553931603133 | 172.39907939484  |
| FXYD7  | 42.3433931248155 | 41.9894412416874 | 41.8751578329365 | 46.1673159982664 |
|        | 46.0043807840705 | 39.7394181011603 | 51.4349390827895 | 39.2672712041774 |
|        | 36.5393857306744 | 44.0409178714232 | 39.2542963855807 | 40.0557788909923 |
| FYB    | 71.7624419474395 | 75.0873720488265 | 97.4515987591398 | 312.795596385258 |
|        | 52.8843091010101 | 76.4439037944547 | 85.1227830573138 | 75.719886024949  |
|        | 52.2216613535546 | 47.9707112435212 | 56.0794100106654 | 46.9867599298218 |
| FYCO1  | 131.645714321903 | 189.80672643731  | 161.739131587013 | 115.299308625328 |
|        | 173.925818790068 | 482.5816387921   | 105.549249728506 | 142.309369995384 |
|        | 106.418690759491 | 495.453743436613 | 367.235521372008 | 385.512974999198 |
| FYN    | 69.8231400816467 | 72.8306652548968 | 118.05982513603  | 144.578232267116 |
|        | 52.6922486991742 | 207.833867050257 | 61.9504984796308 | 114.78317743597  |
|        | 50.7196000170597 | 97.0442565553353 | 100.393361901962 | 110.860844149372 |
| FYTTD1 | 64.4895418579465 | 70.5699797830702 | 71.6931243081178 |                  |
|        | 75.3630857139861 | 81.3364476638024 | 104.704892803169 | 76.3583555666815 |

|       |                  |                  |                  |                  |
|-------|------------------|------------------|------------------|------------------|
|       | 91.2647023876304 | 75.3761360028971 | 91.036114822363  | 86.1779349281961 |
|       | 89.9929484069346 |                  |                  |                  |
| FZD1  | 81.8569832022381 | 85.5797236700758 | 51.1687217969783 | 54.4586176399381 |
|       | 61.7566103867825 | 56.3293881184854 | 56.9320717885002 | 49.7309743973184 |
|       | 66.7357366223349 | 57.6791750431251 | 54.3554233228353 | 54.1941919612524 |
| FZD10 | 41.7397731376692 | 44.8529259387308 | 48.6037684272115 | 42.1273928203021 |
|       | 39.1650142708257 | 42.750861693377  | 34.2773859804062 | 35.4526946152955 |
|       | 53.6446045619513 | 37.3179578037963 | 41.5421429082231 | 46.6397391251762 |
| FZD2  | 298.252355588344 | 67.1926218405833 | 54.0536858212253 | 162.151812425949 |
|       | 280.075938355178 | 86.6910280940418 | 244.837105178705 | 162.181462827314 |
|       | 205.854666205308 | 74.3187437598836 | 114.979124960177 | 50.5511827666954 |
| FZD3  | 71.7624419474395 | 64.8903340853337 | 69.4047473173218 | 47.8164193292842 |
|       | 47.0954207417646 | 77.2834482217973 | 99.1769280484821 | 63.0748373122119 |
|       | 113.655306804539 | 96.7422527189063 | 104.313754953569 | 108.299918384297 |
| FZD4  | 127.232160404726 | 181.565843182713 | 340.491194032068 | 201.782740241526 |
|       | 119.72858253254  | 289.909646207746 | 84.7782034884529 | 112.613079254002 |
|       | 119.167027972122 | 146.311363191836 | 168.326515533208 | 113.130838519437 |
| FZD5  | 48.2910530887214 | 62.6236991757723 | 50.9010149857308 | 37.7469621225553 |
|       | 65.1757400078647 | 43.5752393599169 | 88.0664425843955 | 66.4207938873541 |
|       | 95.4942268742467 | 63.7002949745101 | 61.4121672148248 | 72.4651758215622 |
| FZD6  | 41.1523487516364 | 73.6855877240541 | 69.24946602508   | 43.5627649099623 |
|       | 67.6011992144113 | 45.7300501624017 | 52.7002314230604 | 53.9465584609317 |
|       | 94.8408264309872 | 73.7133884699889 | 78.806097512943  | 84.2728210732532 |
| FZD7  | 119.277678423944 | 70.2553917409773 | 91.4581948567397 | 77.1614179978243 |
|       | 77.7140342228764 | 134.489077146096 | 84.5678487053881 | 91.3607028449916 |
|       | 81.6508259258669 | 153.019365845424 | 167.626012561905 | 102.971363152434 |
| FZD8  | 52.2236479204029 | 45.9266745571724 | 45.1569741609597 | 41.7614975630362 |
|       | 41.0885562160946 | 55.9351706773613 | 40.3302268293707 | 42.8482181313226 |
|       | 45.1899271235974 | 46.8954576545929 | 44.0409178714232 | 44.3521099857368 |
| FZD9  | 70.083473392272  | 44.1239711172417 | 43.4709415392696 | 48.1662933382789 |
|       | 98.4847140916184 | 55.540888910486  | 52.561573697155  | 52.5909491535773 |
|       | 82.7229468743536 | 49.7259371799014 | 52.5930185400362 | 37.4554876386402 |
| FZR1  | 51.1055541075029 | 54.6089451252049 | 47.646800205189  | 51.7739270955254 |
|       | 58.2780916793348 | 55.3202238943712 | 47.4439407315335 | 41.7419877611072 |
|       | 46.7760357462635 | 57.5713378330876 | 56.9320717885002 | 48.1627097465883 |
| G0S2  | 49.6241203903354 | 45.3486182278177 | 142.614006543733 | 2191.09005731751 |
|       | 81.4621222177298 | 123.768417863139 | 525.522657246248 | 56.8094693588238 |
|       | 45.5779686360641 | 55.0016608333828 | 53.4921736109774 | 50.2163892855092 |
| G3BP1 | 88.5140510969737 | 83.6351558609087 | 88.4211119834434 | 103.139459009593 |
|       | 132.205423909251 | 120.392561825049 | 94.3537052300317 | 80.1144023887293 |
|       | 91.2769094348604 | 69.4677195088043 | 83.8637731385607 | 97.1271615802556 |
| G3BP2 | 241.24267509333  | 250.504350952583 | 224.914980996667 | 192.171116215791 |
|       | 204.992039590717 | 218.013913036142 | 145.630337418553 | 159.248015095017 |
|       | 197.515728627482 | 145.232878862479 | 154.045685048215 | 236.307055572306 |
| G6PC  | 40.4639532172338 | 39.5637454855233 | 43.401782064778  | 40.646702696033  |
|       | 44.6231541342    | 43.1180113655693 | 39.5496902678788 | 41.2098211956301 |
|       | 39.6609238036815 | 40.4518431978241 | 36.6603338274678 | 39.1878770155069 |
| G6PC2 | 41.7397731376692 | 40.1989248349075 | 39.991353369336  | 39.0031581123233 |
|       | 42.6022652963326 | 39.6705473876526 | 40.6750540874299 | 41.8792703207442 |
|       | 41.7627910693483 | 42.9285286409526 | 40.723990462047  | 38.6454098044474 |
| G6PC3 | 202.128650032341 | 211.701234819986 | 169.557757933574 | 221.163225922749 |
|       | 168.247603128156 | 147.424598105182 | 328.176884082116 | 277.993522959259 |
|       | 397.798003824167 | 270.202959012185 | 355.319959025243 | 157.133627517432 |

G6PD 234.308728996238 116.426770366736 207.768377497439 203.46147333933  
459.92905629125 167.449422388453 197.040881690021 175.529493306927  
230.594000005581 155.693953208351 143.399636653204 133.43526498879  
GAA 168.492959515167 84.5180930520475 219.238235572894 169.818067865324  
150.801729138762 101.103458852775 108.213380368446 161.603201688692  
247.676607756929 236.727577348109 226.090904721424 170.128899555014  
GAB1 44.5732978059923 42.3550738181144 40.1474543172332 42.4580504587581  
40.0230205296014 47.2410131431265 39.8390535343912 42.6975474602554  
42.5750559787101 44.6918600441328 45.310660704531 47.0797760763156  
GAB2 57.9038523094718 50.1860191642359 48.0191002461099 111.626292905866  
48.0901896064056 72.6824533717231 73.1654226019863 68.0342444360948  
45.9693232070002 56.9463858443402 57.0427273538849 64.9890714157316  
GAB3 49.085741080241 47.1332119496722 47.2055133646385 90.2790229242453  
42.1650127805175 52.2089306840125 42.4939802311136 39.0620487644635  
40.4220196471124 47.9056710878325 47.4630625313159 45.6692241948108  
GAB4 40.9558083259517 47.2770121962655 45.7968648044613 44.4367387274922  
40.8873907150245 43.4681646416585 44.8643898647322 42.157627240486  
40.7847110517594 43.401782064778 44.4688999098904 46.4499258373233  
GABARAP 74.0913177754682 60.0601788842942 50.3950981988762  
63.0153175111747 50.3713170502557 55.9351706773613 68.1125016199524  
74.2517888452553 50.2223403889892 73.9732553364283 60.6505672212119  
65.524821699432  
GABARAPL1 379.79657860938 211.451463038315 201.616017553422  
614.807633538557 140.076084766156 731.071171171638 233.501069644324  
693.727004855319 197.617554897454 727.788854407888 666.816487335088  
780.708896888794  
GABARAPL2 446.902178094675 504.676944739425 663.372296297652  
567.534792333871 345.615640348066 433.447319956981 357.254500791202  
300.560071753181 334.170764774986 272.930242946726 357.111253129662  
495.26603220907  
GABBR1 64.668912004173 52.2973903538281 73.8949517122417  
56.4578213622965 52.6058831807321 60.3093790894864 57.3032522296189  
60.7502080097304 51.631710130416 76.3168793429802 79.1209792219434  
70.8546350449171  
GABBR2 90.7551885299639 61.3428092991286 42.7303139017786  
46.8954576545929 86.5513342734384 42.9695585740813 299.476376921942  
805.590413262364 41.4636047919453 45.5776159432079 45.390192977585  
40.5703581862752  
GABPA 62.5968484440453 84.7222416138393 86.5616422570166 76.5411379733694  
82.2348885628237 95.1000239210194 72.8653205184014 53.838484549134  
80.2381651206227 54.1683282066029 70.2606858200937 73.5599394565136  
GABPAP 41.9969132604035 40.4014349193189 42.9104454767916  
44.8793734665306 40.8346075138147 42.7982502551634 42.5487932018953  
41.7419877611072 43.2264757900051 41.7405682794166 43.9663150905585  
42.7393803617562  
GABPB2 1387.28483887704 787.671342652389 920.504890206997  
1147.19483787501 757.833254346899 557.094756796515 1132.19026676901  
1649.78627644882 743.463635670141 1658.86829668934 1707.92349760322  
1123.99110499679  
GABRA1 40.6559419616644 35.2143190355414 40.4070046183108  
37.9875302985336 37.7576900881741 36.2015763253919 38.2933870238743  
37.4484310268909 39.1790517315259 39.1621898366355 33.1645364749371  
38.3291713594599

GABRA2 38.304249186058 39.1982470626863 42.9104454767916  
35.3829784221072 35.0181575202066 40.650742261428 45.7452456977857  
40.2382908228517 41.2870505273664 43.4885245598939 41.7272875295469  
39.7411455670172

GABRA3 36.8072833828297 41.3610369241157 41.6977706798234  
43.3078542962968 42.269054475455 41.7627910693483 39.7576136507593  
46.1673159982664 38.5252456306656 39.7835513496873 37.4642807402741  
41.4508241771315

GABRA4 41.0608773166058 37.8217989841918 36.0306975524309  
36.0481934423077 40.5710637884029 36.3845892764084 43.1931731665131  
33.7818132446042 35.4332080966594 43.7303813515864 42.2618615571566  
41.6550823405646

GABRA5 44.0707087774725 42.8542642792862 39.9101908547397  
41.8291484190524 41.9842695818285 35.4526946152955 40.8681871019812  
39.2248354955045 39.7537274655115 41.3641352453779 41.0050831223107  
44.1063440402552

GABRA6 34.4021554788966 37.2810767789306 36.9795961564828  
36.4564050256915 35.6434124419782 41.8613406887824 36.9355798143571  
34.9580369221164 37.5469247328848 42.4594149893798 38.956280281655  
38.8495095797881

GABRB1 41.5421429082231 41.159706131351 38.0452862258803  
40.8681871019812 39.859345745831 39.132725377815 41.4742337714895  
41.4508241771315 39.7537274655115 36.1550293353654 44.4688999098904  
43.3744503319109

GABRB2 45.4507786740825 38.6414316877471 37.7000400506818  
37.5764485234171 41.2424637338424 39.7394181011603 41.5817737564592  
36.9355798143571 38.9834959368496 38.8295492252264 40.8681871019812  
42.357910063876

GABRB3 39.3257528345627 36.9406635096502 39.6938066205531  
40.3530367065738 42.2307216849747 39.8929881312378 43.4544762830742  
45.7995623076688 42.7635040180321 39.2069469784204 42.5884861805987  
42.0772855634209

GABRD 43.5710871617107 45.0905928998779 52.6275131390249 44.0451487108213  
44.0451487108213 47.6803619768589 48.4859552186772 44.0390019242862  
40.4997186069494 41.3321861371202 50.4740079109854 42.57175366709

GABRE 63.4610447573417 50.4487395010341 51.8122261766744 48.9386616209853  
204.039190380778 53.565717255469 46.9929836306816 55.8579198774476  
87.6018870099686 162.467159261789 99.126949393699 87.7460859694899

GABRG1 43.2724556187214 35.0222940937513 42.7303139017786  
37.1894304543751 45.2556760873335 41.554942319225 41.4742337714895  
31.9468644542969 40.4997186069494 38.957687788868 38.2795150354677  
37.8490162439785

GABRG2 38.7537364570873 44.9370339275041 37.5222959113204  
39.5637454855233 46.0977687311222 48.1310137493545 47.6810611485413  
41.1575777497576 39.4762546236449 40.8049408996274 41.4860822396574  
43.5420658412177

GABRG3 42.0532901689036 41.8848959280916 41.437237454134  
43.3078542962968 36.9702228618069 41.159706131351 41.5817737564592  
41.1575777497576 39.4762546236449 46.0119912782855 42.2618615571566  
41.9430737035925

GABRP 54.7786516309154 46.29198852834 43.0971787292711 53.3967242431461  
45.1137938810047 49.5424425850549 42.0605906240248 78.9361044544626  
62.9922928277769 41.2276963324981 44.1148826235374 50.3118072462443

GABRQ 38.304249186058 38.2263227947189 34.806104801006 38.745552403895  
35.9058393060637 39.132725377815 33.6696565339534 39.3709357615493  
38.6322728994674 36.3612409063792 37.4642807402741 31.5556621809114  
GABRR1 39.3709357615493 46.7591817286632 42.0621425894624  
35.49696651597 52.3242437351389 47.0027453663546 53.7423898357583  
43.2551508830106 38.4344387289956 35.7202909649682 41.5421429082231  
37.2810767789306  
GABRR2 42.2455707947223 37.10170285405 38.7745734037492  
40.4359177791566 46.7508829977587 38.3418933808844 38.941855825269  
37.33030683349 39.2809305246091 35.4990901121893 39.7342718293432  
46.1592873342534  
GABRR3 42.1537476443423 45.0115870036541 35.0970060242246  
38.5252456306656 34.5301949364147 37.7000400506818 33.7574445386307  
38.3684202018524 38.5252456306656 37.0320432433314 37.4642807402741  
37.6557714476853  
GAD1 80.7227211275429 76.1382217104599 52.0359304386476 41.4606714407332  
61.2070368742244 40.1846227436522 94.952392592003 71.9200120168048  
50.0526763693329 79.3775933954493 69.11736279512 61.4884606677516  
GAD2 35.8208542506595 37.2810767789306 36.1042012504758 36.7892997857376  
37.4470183315826 36.4986986135769 34.6720534245631 45.3872406432794  
46.2027193115397 39.4710743516517 37.3687900733549 39.8497227447888  
GADD45A 261.878099018309 431.727858902449 506.75912743556  
226.35806628102 201.875082892488 253.333114749013 381.480149599459  
224.509915754308 196.17328008185 182.246578375636 323.855522995794  
496.163796158189  
GADD45B 83.7215159198897 75.885672222265 74.5886835786452  
210.255784687052 74.8013460023603 841.850722284484 94.1289383735162  
249.411435337932 73.4122412764173 72.7502212566295 70.9319024596628  
105.220978559157  
GADD45G 75.6471706262645 61.6878176260761 45.310660704531  
84.2804410361247 50.5110359971301 99.2749350936362 79.5707751325986  
95.491982090349 59.5093038629766 79.262977183608 88.7928773498158  
61.2685222381296  
GADD45GIP1 37.8386378737561 47.5647821785529 41.528370959196  
44.1483976313959 39.4693871570028 43.2805590023412 35.6056062164318  
41.2551966132486 52.1788489555942 40.5090849993014 44.2925355984056  
35.3525469364579  
GADL1 41.2424637338424 36.6968906669565 37.2838080935695 39.2780515621926  
40.3452320167286 37.7000400506818 42.4939802311136 40.4359177791566  
35.6139301508335 42.8936990772838 38.079222289614 35.3525469364579  
GAGE1 43.7585538437696 43.2649781354792 43.0971787292711 41.7614975630362  
41.8524296959457 41.6178506967511 41.8315602975157 42.9887069977696  
41.3468610075772 41.5696109388121 42.3350406618256 41.5132248356707  
GAGE12G 36.3649677956953 45.0905928998779 48.4890615340603  
46.1673159982664 44.9936360641969 43.8582747295766 40.1235656101329  
42.9301944191913 39.2809305246091 45.9004543328976 47.2134341420411  
44.3521099857368  
GAGE12I 40.308802735799 43.2649781354792 42.9104454767916  
43.6726153508978 43.4544762830742 45.0882356578404 44.5390641547628  
40.047314525032 42.6762317063737 38.745552403895 41.3553369544097  
42.0424641526302  
GAGE2C 44.6231541342 41.9894412416874 46.0727230219512  
41.8778873678551 44.8897737954573 44.6524308640784 52.561573697155

|         |                  |                  |                  |                  |
|---------|------------------|------------------|------------------|------------------|
|         | 48.272324215504  | 45.3756389170606 | 42.2614524730856 | 42.2618615571566 |
|         | 35.6427313468066 |                  |                  |                  |
| GAGE4   | 41.0608773166058 | 42.0500582486532 | 39.6451483836089 | 39.4569929845912 |
|         | 42.6575535390785 | 41.7627910693483 | 40.4359177791566 | 38.5457716679071 |
|         | 42.9020321355927 | 39.7411455670172 | 38.3684202018524 | 45.063792968927  |
| GAGE5   | 43.6706764143908 | 44.9370339275041 | 40.0599807618105 | 41.353786352147  |
|         | 42.2510526338368 | 40.4779565600984 | 43.607701594929  | 40.5158867964016 |
|         | 40.7493885015617 | 43.6656890131156 | 46.0459873800125 | 40.5207392413115 |
| GAGE6   | 41.6698172204688 | 41.9397336249742 | 40.4882741869718 | 40.2563544693508 |
|         | 42.5435283762933 | 40.5281496800812 | 42.551356054931  | 39.9084621723809 |
|         | 41.6285300488826 | 44.0409178714232 | 36.7950674999881 | 38.3880780363593 |
| GAGE7   | 37.55264801907   | 43.5873188565519 | 45.6989664108554 | 46.1673159982664 |
|         | 47.9128504683618 | 45.1873487463472 | 51.3064929551674 | 40.931294690669  |
|         | 49.9162522057712 | 46.8954576545929 | 47.8988096575648 | 45.2783024981315 |
| GAGE8   | 32.2133093774284 | 42.5269793679335 | 34.9849896310235 | 35.314469458379  |
|         | 40.7779767565889 | 33.5578650644246 | 36.197424053556  | 39.2672712041774 |
|         | 39.1790517315259 | 35.3849221682845 | 36.2435874904689 | 42.6758568421347 |
| GAK     | 190.854807132673 | 244.226756210656 | 286.11425202743  | 243.27954361539  |
|         | 208.189151365575 | 164.547318765586 | 261.374019422095 | 195.482216656634 |
|         | 277.204818876581 | 229.188779190649 | 238.697159169213 | 171.829798001437 |
| GAL     | 53.8856501960117 | 38.1312950900467 | 48.1997158668729 | 36.5393857306744 |
|         | 828.403901345618 | 128.126336084436 | 62.3556396662215 | 63.287067794195  |
|         | 63.2753814090696 | 37.3179578037963 | 44.4688999098904 | 44.2527566343661 |
| GAL3ST1 | 42.9104454767916 | 49.6841415268611 | 36.8730514568925 |                  |
|         | 37.651298468202  | 42.3685136297603 | 42.6575535390785 | 39.5496902678788 |
|         | 39.853866204927  | 33.5578650644246 | 42.785429206422  | 37.4642807402741 |
|         | 39.7411455670172 |                  |                  |                  |
| GAL3ST2 | 50.9381343674699 | 54.0461131287999 | 44.7829632472754 |                  |
|         | 40.646702696033  | 44.3557408297309 | 53.6858208094027 | 47.2927436772465 |
|         | 49.9332280449549 | 58.2401724760744 | 52.6879797806876 | 38.745552403895  |
|         | 51.7833333848627 |                  |                  |                  |
| GAL3ST3 | 45.8108990837624 | 40.5400384479766 | 42.5890635915791 |                  |
|         | 45.8844325913247 | 42.2455707947223 | 43.2312848495114 | 42.3194600586894 |
|         | 39.4223544019653 | 43.0456011922275 | 42.5664883002833 | 42.3413611855132 |
|         | 40.1235656101329 |                  |                  |                  |
| GAL3ST4 | 43.1805016690297 | 46.0713306971594 | 37.2838080935695 |                  |
|         | 43.3078542962968 | 33.0463640202858 | 44.4619248757502 | 37.7136011474903 |
|         | 42.2577689927563 | 37.1820543575123 | 38.745552403895  | 39.5399188536544 |
|         | 35.4484652445078 |                  |                  |                  |
| GALC    | 130.506891299903 | 115.414481087246 | 327.878405194732 | 279.485290822376 |
|         | 82.3181867658154 | 124.751020763508 | 62.0404348860702 | 74.7127063822938 |
|         | 102.797268694325 | 147.719172115976 | 130.10148014895  | 123.978615472736 |
| GALE    | 81.763263551338  | 82.0102749744973 | 123.039116845742 | 64.7830058555944 |
|         | 94.5055588176321 | 48.9826868640753 | 107.610858427836 | 87.4850071876743 |
|         | 126.071077511531 | 97.3870880869036 | 97.1634390603131 | 88.2604063995148 |
| GALIG   | 101.935321521672 | 84.8084949516218 | 78.080034922779  | 68.9937449813561 |
|         | 42.269054475455  | 58.2531879680192 | 44.2166118829877 | 63.287067794195  |
|         | 50.4974478884077 | 50.1649089793069 | 56.0477607422828 | 51.7833333848627 |
| GALK1   | 506.173054520807 | 262.579533452771 | 377.626746989976 | 614.088027946471 |
|         | 377.491895827114 | 339.418989022736 | 445.421601813221 | 499.744856832174 |
|         | 454.701322158431 | 234.8262403783   | 260.618790701505 | 217.065944053174 |
| GALK2   | 55.4366435285754 | 77.8039806950172 | 65.8986841086198 | 57.3837827230023 |
|         | 94.233414682323  | 71.0935990523782 | 70.9702772728923 | 58.1242391848692 |
|         | 74.2517888452553 | 53.1182952086284 | 57.4078217542368 | 60.3217748365169 |

GALM 298.252355588344 206.234676343851 142.262349841307 235.075347885884  
134.981483569602 111.669813610213 439.770250139925 351.239677010973  
243.609178976074 223.356945665761 194.207518642389 164.435300801872  
GALNAC4S-6ST 273.460165751162 92.4953883194488 84.3755392205436  
549.67905283016 97.1271615802556 171.877918435017 63.2726414544553  
72.121833189378 64.7766649630041 75.2053836356882 107.538934056558  
110.731862140996  
GALNS 49.6241203903354 47.087835967892 48.7039705048129 45.1944222548351  
46.8674366115656 49.4157684139858 38.7337086062875 49.9332280449549  
47.4699236780425 45.1569741609597 51.1483696410762 43.6753843488695  
GALNT1 86.6655289455628 150.051297690759 114.039396407323  
76.8521423078922 100.413031488199 61.7566103867825 67.1299518044849  
86.3237770387663 141.924244643825 83.9873645051122 72.5835488194631  
80.6200293361016  
GALNT10 62.1448806673973 46.5372362927461 51.0902940392974  
56.5583372864784 48.7738999860475 51.1183745411436 40.1572444265517  
54.4602501503065 50.8720311700491 46.0119912782855 46.3563690926644  
54.1618170692792  
GALNT11 140.369714831352 137.818833473709 169.344094528032  
144.239350177363 148.654594696193 207.726011653345 109.062415049404  
142.545268664218 110.599131324937 208.943204358024 254.159017331462  
261.878099018309  
GALNT12 53.4921736109774 293.583101558009 80.354283778818  
61.0845101400379 74.8013460023603 122.758873982957 153.901083585889  
86.915098846441 91.0952554578659 67.8233625051884 70.0402992940342  
119.833821068193  
GALNT13 43.9309845324767 38.3322849790657 44.2405728317107  
44.7980740332174 36.2048942610546 45.1873487463472 41.706879587091  
40.047314525032 41.7627910693483 44.7958122466628 45.0589947942306  
43.7672102682067  
GALNT14 40.7609952437622 61.3428092991286 57.8111054584154  
35.0448343468967 42.4864576619427 42.357910063876 48.3411413510851  
52.7787010032051 57.404059248727 46.5650556481721 47.4630625313159  
50.1579724208315  
GALNT17 44.7915315085948 45.5842286511645 50.6987358483181  
42.357910063876 38.4540849632254 40.244271403831 56.9320717885002  
47.3791873993182 46.4164127487052 46.7646877499666 54.7061116419212  
44.1452943804044  
GALNT2 45.4799270968969 46.9919960628953 50.9010149857308  
36.1562979552173 39.859345745831 49.641159251878 46.1634822993009  
47.4740726032707 38.9834959368496 38.3092241935352 51.524711857679  
46.8129509799753  
GALNT3 130.002385558757 97.2004257862686 68.0649030501515  
113.783910320605 99.571118823509 79.0940380276977 135.997802304719  
164.122105098254 89.0684909049451 173.150885069619 168.78407943637  
124.791747507205  
GALNT4 69.5462764096011 76.9303701148105 72.7987593815919  
65.8926843080114 49.1928206164702 63.3612993417558 65.3694267397114  
86.5926014007562 115.221134337342 63.0119737420787 59.8070012006708  
68.0751111916102  
GALNT5 49.4151347850687 41.6466169548846 37.9482157381008  
42.0102671859606 39.9697332660833 34.9849896310235 45.3597029614942  
37.33030683349 39.3750969348308 33.6902293666089 34.9428206949566  
38.2350720635382



GALNT6 49.6241203903354 45.3486182278177 56.7776874358774  
60.9379216295576 54.6820069269589 43.1826328292558 56.4809146784765  
61.5000955267432 51.2066664465185 38.3092241935352 45.4799270968969  
42.2577689927563  
GALNT7 38.304249186058 39.2907645923217 33.1559412791294  
38.8495095797881 33.6330903323612 36.6271061451613 30.6643697826563  
33.0038344711883 37.0126425326534 33.8984830800739 34.7308008643142  
35.3525469364579  
GALNT8 43.7585538437696 41.9894412416874 44.5134109184888  
40.5484717678957 40.6723334103791 39.2248354955045 41.3594868055879  
44.797320243931 39.853866204927 37.3179578037963 44.0409178714232  
36.9976231206067  
GALNT9 39.1590964332473 43.074472921841 41.2365089689635  
41.948762493127 40.6723334103791 41.5083179498332 40.0052661202207  
38.4187686307607 41.6373771565199 40.0633222311529 41.6336636285875  
40.2175332777639  
GALNTL1 47.7779356299965 45.1390218677367 45.645828394758  
44.3440839686558 51.0107745412152 108.654797121478 48.9088046212958  
46.7508829977587 46.9739160257217 60.1466326805616 50.4740079109854  
62.3997407955361  
GALNTL2 59.3923286524971 36.6002100641539 42.3536549114165  
47.2009420656854 39.9697332660833 83.8726595797859 40.2154497375715  
44.293922970134 44.0519245668737 84.6563174894574 117.282216847547  
156.433762355183  
GALNTL4 64.0759817636265 131.917451557976 156.174166381986  
82.7394574977114 105.317399386109 92.1151486847283 42.357910063876  
64.8336014343435 78.055431384988 61.5635554619635 93.4144098590192  
142.492693744683  
GALNTL5 36.4564050256915 38.8336427948187 35.7105247506212  
44.7980740332174 36.3390947880186 39.2248354955045 38.5066108855005  
33.9687743313429 39.2809305246091 38.745552403895 36.9060997041453  
41.6550823405646  
GALP 39.3709357615493 43.7644428186265 39.7411455670172 42.6913548400127  
37.0526522140242 42.6575535390785 45.7452456977857 41.0381860307445  
39.9444191873552 39.8873706855774 39.4410515050885 42.357910063876  
GALR1 38.2496050953547 43.9783383422823 39.044540595942 37.0732977341185  
40.1151953732637 42.6211340086915 44.7255207589606 38.8495095797881  
40.3662560853635 39.9948390976317 36.131485826118 38.8964578286293  
GALR2 49.8472708021525 52.1967540852276 39.4710743516517 38.745552403895  
80.428712610358 51.702461863489 74.7534423194688 80.2680308979464  
51.5888395924843 43.9450023643394 47.2134341420411 42.57175366709  
GALR3 43.0001432913058 37.1685072112618 38.35720098134 41.8291484190524  
39.8198309498737 41.7627910693483 43.7585538437696 40.7311497914871  
39.9444191873552 37.9661004970253 44.9081227425497 43.9282059368202  
GALT 82.9467575626263 96.8240908274121 91.5230424957075 80.4007868743886  
102.840494180617 77.5889289318438 88.655273320123 97.095992167029  
60.0736861987141 131.90520406914 105.686346729469 93.6787442149817  
GAMT 59.5000730792772 62.8635815439291 142.012216533823 63.5343940247764  
72.6675345946258 124.841811761412 45.9426591985894 64.120219344545  
118.93749473833 192.318724749487 158.862722884436 143.590160385066  
GAN 45.3872406432794 35.2143190355414 43.5710871617107 41.1886975241176  
41.2740822675592 42.357910063876 41.253645578517 41.0381860307445  
49.1940901905636 40.8970401536578 37.2892641289258 42.8864415494484

|        |                  |                  |                  |                  |
|--------|------------------|------------------|------------------|------------------|
| GANAB  | 85.6964911093755 | 101.351907645804 | 119.545018066492 | 90.9106103192162 |
|        | 124.37984507038  | 80.3805507705979 | 107.748050894857 | 104.822963389102 |
|        | 112.488156568824 | 79.9810256029665 | 108.12482131423  | 99.0545942554244 |
| GANC   | 37.4554876386402 | 43.4396866157171 | 41.437237454134  | 40.8681871019812 |
|        | 41.5668884168669 | 44.7804080899431 | 41.0381860307445 | 48.5681478665796 |
|        | 45.7452456977857 | 45.1569741609597 | 43.9450023643394 | 45.9693232070002 |
| GAP43  | 47.1962846565261 | 44.1239711172417 | 43.0016969050339 | 36.9912468186322 |
|        | 40.5710637884029 | 43.0860383229288 | 39.8695929627783 | 49.8344973836834 |
|        | 39.9444191873552 | 48.7414853386615 | 43.401782064778  | 37.2810767789306 |
| GAPDH  | 3313.98659031004 | 2498.54878472152 | 3361.67247904403 | 2921.68921750799 |
|        | 2779.37660132136 | 1932.2647526188  | 3602.30252142918 | 1731.19220270448 |
|        | 6673.00322263275 | 2196.59044510709 | 1925.20977162704 | 2393.42629339901 |
| GAPDHS | 38.6454098044474 | 40.6723334103791 | 39.2388980107385 |                  |
|        | 46.3919862398545 | 37.6119337673806 | 40.7616966228404 | 42.5660695551615 |
|        | 41.4061152929154 | 39.9791973792384 | 41.5435611403119 | 40.5824352835642 |
|        | 42.1860813954352 |                  |                  |                  |
| GAPVD1 | 287.565588186962 | 225.794026573235 | 165.775214685061 |                  |
|        | 232.516262874696 | 221.123510823097 | 231.198764780818 | 246.313146942736 |
|        | 276.084235934753 | 160.950554451488 | 266.687281047486 | 276.59189773139  |
|        | 248.924819383887 |                  |                  |                  |
| GARNL1 | 86.9032093551446 | 102.220824629896 | 102.228965899392 |                  |
|        | 100.90948905426  | 81.1214257028304 | 139.121494956408 | 73.5993692960562 |
|        | 87.0116305167987 | 103.264100180823 | 162.628603963754 | 132.3192754634   |
|        | 140.648209468568 |                  |                  |                  |
| GARNL3 | 61.7551416187554 | 70.4933405598359 | 70.3613168347492 |                  |
|        | 41.4273122914951 | 55.6069214673486 | 133.798096986107 | 76.0041771381018 |
|        | 50.5070012045444 | 45.2897806651929 | 153.059039745191 | 109.677588309718 |
|        | 74.7557519831859 |                  |                  |                  |
| GARNL4 | 94.2762661604561 | 151.175959542368 | 102.942921317489 |                  |
|        | 68.1992221684165 | 87.1397220361868 | 53.9517841438975 | 124.252483407658 |
|        | 104.351256270039 | 60.3351200884626 | 60.6779753362314 | 62.3990310986805 |
|        | 59.8400088701028 |                  |                  |                  |
| GARS   | 550.861615347663 | 567.393665550133 | 438.50123471613  | 619.337575854369 |
|        | 666.265306908449 | 459.182372959714 | 666.816487335088 | 464.352441400358 |
|        | 749.49934348018  | 250.621261212308 | 311.149068752273 | 361.023743912857 |
| GART   | 112.644426507762 | 177.688415930665 | 167.872060678879 | 118.186590679218 |
|        | 439.376432049616 | 118.186590679218 | 164.580141651883 | 150.262748333939 |
|        | 180.562005428669 | 81.6508259258669 | 90.3531863862054 | 132.851109034738 |
| GAS1   | 574.847203528544 | 72.3297091475814 | 51.6660481331154 | 256.116479208201 |
|        | 64.6835308827804 | 505.294880430281 | 55.6268253440479 | 49.6203214143464 |
|        | 43.9450023643394 | 224.871193467078 | 218.819478568299 | 151.425712904293 |
| GAS2   | 37.7805366040928 | 55.7067742610401 | 34.0927410219282 | 36.890925044696  |
|        | 37.956732373465  | 38.385865183581  | 36.03517591974   | 36.9948667320377 |
|        | 40.3316153483289 | 54.5641201866931 | 40.4995052849302 | 42.828737648529  |
| GAS2L1 | 56.3471340054074 | 49.0697565324841 | 50.4778868815688 |                  |
|        | 47.0033848638449 | 54.5683518971261 | 47.0027453663546 | 47.3605100090439 |
|        | 46.8954576545929 | 54.6235981131919 | 48.2596564318071 | 48.042366934301  |
|        | 46.3411353377615 |                  |                  |                  |
| GAS2L2 | 39.3100256336821 | 35.2143190355414 | 41.1742244762318 |                  |
|        | 38.5252456306656 | 39.7210115145672 | 39.266565827316  | 38.8775560911841 |
|        | 39.4223544019653 | 44.5678064264717 | 40.2615278292875 | 35.3870574564807 |
|        | 41.4508241771315 |                  |                  |                  |
| GAS2L3 | 48.2910530887214 | 64.5347406608537 | 44.6032218589199 |                  |
|        | 73.0371862899659 | 49.8304479381623 | 45.0882356578404 | 64.0985088513857 |

|         |                   |                  |                  |                  |
|---------|-------------------|------------------|------------------|------------------|
|         | 86.0944261788554  | 52.7512110769042 | 58.8022152133979 | 57.4078217542368 |
|         | 54.4992295592001  |                  |                  |                  |
| GAS5    | 36.5393857306744  | 37.8217989841918 | 39.3709357615493 | 43.8002456102021 |
|         | 35.2163900400329  | 38.1169703906207 | 40.2154497375715 | 41.5464765641928 |
|         | 38.7298222155532  | 38.3092241935352 | 47.3791873993182 | 40.0557788909923 |
| GAS6    | 323.576613035353  | 225.35760689842  | 155.252915611651 | 347.247950836937 |
|         | 115.735359157053  | 809.577874019028 | 66.2978052628661 | 158.884110481815 |
|         | 74.1696173738106  | 527.037018015766 | 616.265771322835 | 316.419421649196 |
| GAS7    | 63.340012816413   | 43.1567024035183 | 41.785676764591  | 62.5106969730855 |
|         | 43.7858612339862  | 121.336830564295 | 41.5464765641928 | 46.0106098064475 |
|         | 42.7522261624826  | 65.9574246586409 | 68.8362790228976 | 81.3082994649699 |
| GAS8    | 118.358996104366  | 183.854020356927 | 189.164097331837 | 77.3864518736634 |
|         | 124.664792638889  | 130.648278937122 | 169.859588818306 | 96.5813769696577 |
|         | 117.732966326465  | 149.59360999995  | 137.016387648703 | 105.05842887748  |
| GAST    | 45.1912496459517  | 47.8400694856726 | 51.3268475761593 | 65.8926843080114 |
|         | 51.2525124735102  | 50.3245489035833 | 61.5000955267432 | 50.5070012045444 |
|         | 54.998510746958   | 50.8826620053386 | 47.2134341420411 | 43.9541718254769 |
| GATA1   | 41.8409927585705  | 45.4143854024453 | 37.6557714476853 | 42.5664883002833 |
|         | 41.3755760434934  | 42.6575535390785 | 38.941855825269  | 37.6557714476853 |
|         | 40.9901805728485  | 43.2988017098387 | 36.131485826118  | 40.5703581862752 |
| GATA2   | 77.7665223272661  | 435.632247999054 | 374.427492246826 | 59.6153684374766 |
|         | 155.174579191838  | 86.915098846441  | 86.4114854104675 | 84.0899854321388 |
|         | 71.8576824255215  | 413.516548092483 | 413.918050849658 | 92.9600461444587 |
| GATA3   | 82.291097567232   | 646.791777335656 | 648.380417557148 | 52.6947911480086 |
|         | 876.9597444461441 | 129.81569370219  | 1330.19215036764 | 361.57814355509  |
|         | 866.712228831149  | 850.205634919459 | 820.147156401172 | 592.205084997276 |
| GATA4   | 39.5676051939342  | 38.1312950900467 | 39.7411455670172 | 41.8778873678551 |
|         | 41.467005949568   | 39.3841861812262 | 42.9803717121865 | 39.1652965788406 |
|         | 45.5779686360641  | 42.2614524730856 | 37.2892641289258 | 40.1700117452801 |
| GATA5   | 38.5007204246293  | 45.8669209716694 | 42.8270038153139 | 45.1944222548351 |
|         | 45.1137938810047  | 120.618530729822 | 45.223075311113  | 61.5824518349507 |
|         | 45.1899271235974  | 120.274848052394 | 97.4829901136163 | 77.6056319020116 |
| GATA6   | 42.0532901689036  | 43.8495248991589 | 35.8265993915844 | 41.6564075217517 |
|         | 40.2449343247539  | 44.5544727111028 | 36.8369172900902 | 40.5158867964016 |
|         | 39.853866204927   | 40.8970401536578 | 43.4709415392696 | 41.5536168238478 |
| GATAD1  | 81.537796828766   | 61.6219790276408 | 73.1262465119304 |                  |
|         | 59.8102324370568  | 60.5290966885203 | 68.6424653037264 | 62.3556396662215 |
|         | 78.9361044544626  | 81.6508259258669 | 91.2016867646161 | 83.1184264089873 |
|         | 96.3918711895208  |                  |                  |                  |
| GATAD2A | 455.223217772744  | 575.268446033282 | 536.73426937255  |                  |
|         | 513.733739926914  | 1243.32650314893 | 444.618035487523 | 563.927521628693 |
|         | 490.876152145712  | 466.454993547103 | 394.437597863822 | 495.26603220907  |
|         | 382.872356030213  |                  |                  |                  |
| GATAD2B | 75.3761360028971  | 94.9831937714438 | 111.357508398822 |                  |
|         | 93.7782490229256  | 89.0203733091224 | 81.3978207813439 | 91.5258329186709 |
|         | 107.682738819549  | 85.9087280306456 | 88.9738853594498 | 110.214922820817 |
|         | 89.8035133597498  |                  |                  |                  |
| GATC    | 78.5216977073842  | 62.3983214098965 | 71.0340758556049 | 50.0526763693329 |
|         | 75.7464604972652  | 58.5530199658661 | 92.4534854832186 | 53.2046867327331 |
|         | 77.1317865202676  | 46.2286164776607 | 53.9517841438975 | 70.6903168772326 |
| GATM    | 63.6767189846426  | 75.7257660897685 | 126.578693258328 | 49.5424425850549 |
|         | 319.596352961751  | 200.986069552443 | 68.673864919178  | 60.5571721986885 |
|         | 204.009492151839  | 108.63277045284  | 137.484063876244 | 153.569831699238 |

|       |                  |                  |                  |                  |
|-------|------------------|------------------|------------------|------------------|
| GATS  | 149.933827818309 | 81.7367617812869 | 97.3066473777771 | 68.8167148906225 |
|       | 99.1438953564062 | 167.410607476565 | 92.3034609409756 | 106.871269007146 |
|       | 100.476750028832 | 218.727705098677 | 172.83517237888  | 109.832638804839 |
| GBA   | 321.949943388959 | 237.161912299581 | 477.924466983414 | 589.685739519627 |
|       | 229.992809034971 | 225.056827821165 | 249.37112382902  | 324.320137371059 |
|       | 202.360546931172 | 199.208033538936 | 196.389446842567 | 156.02592319461  |
| GBA2  | 62.5528124447176 | 69.3106426188075 | 56.7272804480684 | 78.7450149191851 |
|       | 65.8319449883221 | 63.3612993417558 | 71.7546556028831 | 68.7227011958449 |
|       | 55.6617952786921 | 75.4836539148799 | 70.4204944097269 | 76.4889974392545 |
| GBA3  | 39.7320564340365 | 38.4330755397458 | 38.8417151851134 | 45.8844325913247 |
|       | 39.1087466732192 | 45.7300501624017 | 41.0381860307445 | 39.5954353681031 |
|       | 149.620814280822 | 38.3501188844251 | 43.9802831041664 | 42.5365257225985 |
| GBAP  | 45.2875173643252 | 42.0709558258414 | 42.0621425894624 | 46.614092935749  |
|       | 46.1804647841331 | 55.1037284831588 | 56.2181240696479 | 43.1567024035183 |
|       | 41.1742244762318 | 41.6373771565199 | 42.170702295259  | 48.4535991392809 |
| GBAS  | 171.33368481035  | 128.806903044733 | 129.179537795204 | 140.894046694804 |
|       | 159.416887501941 | 232.147792636393 | 206.261432452217 | 178.249889756228 |
|       | 189.915336406793 | 169.633672522325 | 156.433762355183 | 208.529062113623 |
| GBE1  | 120.630151942485 | 92.1908585323292 | 124.397048303668 | 186.195424728755 |
|       | 95.6182216943758 | 150.009352890706 | 93.5928272702304 | 71.6202385170491 |
|       | 194.570513601724 | 87.3815040456105 | 124.986782737446 | 156.65747550889  |
| GBF1  | 83.6080176270653 | 110.093465196133 | 118.854313907627 | 104.158950889938 |
|       | 95.6182216943758 | 87.1735705257803 | 95.5117928427637 | 89.3868257841517 |
|       | 74.3394153125605 | 117.634238804678 | 142.515628954457 | 101.2825552085   |
| GBGT1 | 50.315768338317  | 53.7332797903102 | 45.310660704531  | 119.253559091088 |
|       | 45.1137938810047 | 57.3797835448761 | 57.7805922926828 | 55.1933004802607 |
|       | 50.6750785584772 | 53.0357938671646 | 59.4188882103773 | 54.1941919612524 |
| GBL   | 104.059057437473 | 134.300169542594 | 130.10148014895  | 122.548989126048 |
|       | 133.38594323309  | 123.908152883436 | 147.010700944686 | 79.7170181855209 |
|       | 180.916465721523 | 155.123252685926 | 134.504159974855 | 92.084526929319  |
| GBP1  | 295.69493803986  | 272.405201392009 | 164.262531918679 | 579.038638774301 |
|       | 71.0204234759627 | 157.189139558365 | 172.95999061341  | 328.548716133094 |
|       | 62.8635815439291 | 76.9603875266956 | 83.6351558609087 | 83.4679576894911 |
| GBP2  | 1425.37639004849 | 1440.41726370246 | 1679.12630849964 | 1134.52018899688 |
|       | 479.318513108472 | 1180.7204565402  | 1199.29782389306 | 2280.42953098693 |
|       | 192.41551362197  | 2113.73880184695 | 1621.89443989657 | 1354.50256889331 |
| GBP3  | 49.8472708021525 | 53.2046867327331 | 48.7039705048129 | 50.378948785456  |
|       | 57.1935729219207 | 50.9724155054821 | 52.7002314230604 | 65.4714272652857 |
|       | 53.9287524861617 | 51.3351387089044 | 50.7159667633757 | 55.1804535845496 |
| GBP4  | 197.868575583033 | 288.023490151593 | 223.801865347687 | 292.389429869034 |
|       | 69.2787430208317 | 163.299997237276 | 269.184000351658 | 558.855313555287 |
|       | 103.869437847206 | 153.685754085722 | 205.876395674271 | 139.472956453414 |
| GBP5  | 128.923092916744 | 91.2647023876304 | 70.8606919488782 | 529.977491403949 |
|       | 45.4751076037511 | 55.9351706773613 | 69.3468840908665 | 80.2680308979464 |
|       | 45.0997987980157 | 45.2556760873335 | 56.1379957867124 | 40.4639532172338 |
| GBP6  | 38.1169703906207 | 49.4982025424177 | 40.3397581924196 | 41.4727452533295 |
|       | 40.9416717019827 | 42.750861693377  | 37.8877750141557 | 39.2672712041774 |
|       | 39.1790517315259 | 40.6022003765153 | 40.9683275553869 | 40.8681871019812 |
| GBP7  | 35.1307934330047 | 41.2598458726002 | 41.9666541498638 | 36.6501141438378 |
|       | 46.6397391251762 | 39.0266821712099 | 40.9157352260901 | 42.0494116081998 |
|       | 38.6322728994674 | 44.2580151149956 | 36.131485826118  | 41.7575097298927 |
| GBX2  | 42.0532901689036 | 50.543526404059  | 49.7350276169552 | 45.0798408927912 |
|       | 52.6922486991742 | 44.4619248757502 | 46.9929836306816 | 46.9986083378817 |
|       | 53.9287524861617 | 54.7827221235949 | 47.9942520395434 | 50.656598108034  |

|        |                  |                  |                  |                  |
|--------|------------------|------------------|------------------|------------------|
| GC     | 37.2474303302343 | 42.1607322031054 | 39.6451483836089 | 40.5484717678957 |
|        | 36.4434672195785 | 37.9951997351435 | 52.8496345990125 | 36.7460922671619 |
|        | 40.7847110517594 | 37.7315666632629 | 36.0481934423077 | 37.2810767789306 |
| GCA    | 235.514830602053 | 162.000275136397 | 177.494605794577 | 1144.34555072807 |
|        | 152.942332679485 | 275.611524861938 | 402.886581458688 | 205.806939441015 |
|        | 104.626873082138 | 100.756165194192 | 109.386655134289 | 162.02498480452  |
| GCAT   | 107.176733647834 | 98.5097700382506 | 107.161099000408 | 63.6334154351075 |
|        | 259.332340491331 | 95.5920087912438 | 283.643027929014 | 154.482760264318 |
|        | 97.4062608315831 | 106.418690759491 | 93.2484615907966 | 85.6964911093755 |
| GCC1   | 124.22494803053  | 93.6717518147993 | 93.1349769600388 | 112.585860083115 |
|        | 112.830467116678 | 95.3300728806601 | 91.7761668960824 | 125.197314240529 |
|        | 152.441506175141 | 129.434864701718 | 104.076098789396 | 96.8141712830545 |
| GCC2   | 44.2350046179299 | 47.5176439135793 | 47.4356803320662 | 41.1886975241176 |
|        | 41.7395080432869 | 46.8436815733702 | 37.7136011474903 | 40.3662560853635 |
|        | 42.4688861147508 | 39.3016855924751 | 39.2542963855807 | 50.3118072462443 |
| GCDH   | 71.4276813927272 | 70.7003843117511 | 84.1895471533806 | 66.8475050031365 |
|        | 181.772001042799 | 85.3718124658316 | 86.5564881117807 | 84.1639779987105 |
|        | 82.5344501505114 | 71.4356132400211 | 73.9701365395921 | 67.8335962843732 |
| GCET2  | 38.6454098044474 | 42.7261365779149 | 41.3749135519808 | 45.4634652319753 |
|        | 39.9182914210537 | 38.1644569189523 | 39.7576136507593 | 39.1236645052911 |
|        | 40.3704050658025 | 38.9074189954657 | 42.337073256895  | 40.9243125941198 |
| GCG    | 47.1962846565261 | 43.2649781354792 | 44.2405728317107 | 41.8778873678551 |
|        | 56.5933259268408 | 43.4681646416585 | 46.5650556481721 | 44.4031868028216 |
|        | 43.0930293831497 | 39.9948390976317 | 43.3085358214154 | 48.3648494350286 |
| GCGR   | 37.8386378737561 | 41.4508241771315 | 44.1452943804044 | 37.4223289687135 |
|        | 46.9906120932727 | 39.0266821712099 | 37.6036146841933 | 43.4544762830742 |
|        | 48.1174861108648 | 39.2623423164488 | 42.7275315121163 | 41.6550823405646 |
| GCH1   | 54.931538325692  | 73.6323065529916 | 58.691436315511  | 86.6411972262415 |
|        | 46.4775637378703 | 46.4648868771662 | 51.6731332961917 | 53.9060479865677 |
|        | 59.1716224344299 | 48.2596564318071 | 48.5792058061372 | 61.0025829061063 |
| GCHFR  | 429.65084326307  | 188.734299563005 | 113.287380238064 | 459.546279672649 |
|        | 203.417430809331 | 112.60230393988  | 315.592187396219 | 135.259585457958 |
|        | 513.266895252699 | 146.046179302584 | 111.874193363836 | 129.185046410316 |
| GCK    | 35.6420502646498 | 36.8127605061228 | 40.7952353240579 | 38.0365987358005 |
|        | 34.7542091589235 | 35.7608926435784 | 40.9647597231175 | 37.6126279002007 |
|        | 38.1548766517774 | 37.920964499903  | 39.8184668132023 | 39.4888702378044 |
| GCKR   | 44.0328992213727 | 48.6447083765118 | 52.9111155236961 | 42.0102671859606 |
|        | 46.7508829977587 | 42.6575535390785 | 86.7968607218397 | 60.2691630545162 |
|        | 43.5669306063196 | 43.0919221375514 | 44.2142581488029 | 44.5432192783161 |
| GCLC   | 73.3950348855139 | 249.195312452368 | 119.124583755587 | 53.0284011078097 |
|        | 159.248015095017 | 103.199200862158 | 109.726577835621 | 62.105802634526  |
|        | 134.713725350463 | 142.34144664795  | 175.378964448101 | 177.019082240886 |
| GCLM   | 136.786772972738 | 148.255880793905 | 120.771048750176 | 141.423857667761 |
|        | 145.572606290643 | 99.6821042055758 | 179.522572239758 | 143.875527523263 |
|        | 126.038716672534 | 72.0443425395404 | 79.6581393791238 | 117.76002524375  |
| GCM1   | 42.1537476443423 | 39.8695929627783 | 43.401782064778  | 42.0102671859606 |
|        | 43.3332476888305 | 40.5281496800812 | 37.4772922422734 | 39.9576138799997 |
|        | 50.1603795873336 | 43.0919221375514 | 43.0971787292711 | 39.1553169409075 |
| GCM2   | 41.3387790895716 | 40.716553247236  | 38.9790184198145 | 39.1706564265495 |
|        | 41.8806343997257 | 46.3715909653832 | 39.8695929627783 | 43.5544347011646 |
|        | 36.3649677956953 | 38.3092241935352 | 39.0550139257658 | 43.1805016690297 |
| GCN1L1 | 132.838429478396 | 142.863673914134 | 114.224091812993 |                  |
|        | 119.015431849218 | 162.569762535436 | 112.873697337138 | 181.772001042799 |

|         |                  |                  |                  |                  |
|---------|------------------|------------------|------------------|------------------|
|         | 290.087040648659 | 197.617554897454 | 183.799353414581 | 155.942366087388 |
|         | 143.962643695789 |                  |                  |                  |
| GCNT1   | 85.8895787710259 | 52.0770287673248 | 69.4047473173218 | 57.4595416719581 |
|         | 43.1847628331565 | 45.6129956328415 | 46.5650556481721 | 52.0503062610092 |
|         | 65.564930068976  | 43.781101409552  | 45.1778228816327 | 44.9734311311394 |
| GCNT2   | 60.8942621888353 | 41.6466169548846 | 45.1569741609597 | 42.6087443864502 |
|         | 42.7463525131552 | 41.9543948167375 | 43.4844452775022 | 41.413768254554  |
|         | 48.7720246202612 | 43.7707113107752 | 44.6708453138373 | 42.1957516560122 |
| GCNT3   | 1167.25317435052 | 42.0709558258414 | 41.8751578329365 | 49.1786207920603 |
|         | 45.6895223823001 | 42.357910063876  | 44.4639405506967 | 82.5170409503063 |
|         | 45.7452456977857 | 43.2988017098387 | 49.1067959632109 | 73.9192243586276 |
| Gcom1   | 41.9918605927928 | 51.6060290544385 | 42.5864346233886 | 43.6726153508978 |
|         | 46.572043843509  | 90.7101037998119 | 42.1335978926921 | 43.3696672906922 |
|         | 47.3316207658941 | 49.5265949137207 | 57.2777121216586 | 57.6549040984583 |
| GCOM1   | 47.3791873993182 | 65.9574246586409 | 45.3974838013476 | 45.3882138838137 |
|         | 60.4122350478242 | 267.782994219864 | 46.7800033479223 | 55.0698932795613 |
|         | 58.9469577494939 | 64.8549209064366 | 93.3718038663074 | 88.2604063995148 |
| GCS1    | 145.694779669933 | 135.540738841602 | 157.592292551459 | 85.9087280306456 |
|         | 241.599353653369 | 58.4435847520801 | 116.555666104916 | 114.533239859288 |
|         | 127.937436596431 | 103.001949900533 | 110.440072569721 | 112.585860083115 |
| GCSH    | 54.7980088246886 | 51.0744829992368 | 54.4059109100338 | 43.8479689858951 |
|         | 57.6791750431251 | 54.3478800757394 | 59.7863401969736 | 43.4812166409346 |
|         | 48.6494451061637 | 47.0627306565247 | 46.5908542339034 | 46.5045747284981 |
| GCUD2   | 41.4508241771315 | 50.3586212130973 | 54.2670850492947 | 38.0958223740111 |
|         | 54.5683518971261 | 43.4681646416585 | 51.0013344286851 | 56.1404433602127 |
|         | 49.3780606970538 | 43.844855336215  | 40.0766543123257 | 36.3454320848591 |
| GDA     | 42.442231667357  | 46.5650556481721 | 45.4634652319753 | 42.1622837416589 |
|         | 43.004943518025  | 43.0144844590744 | 41.706879587091  | 36.9355798143571 |
|         | 52.3579564953125 | 42.6793753550854 | 39.9586075662602 | 43.0930293831497 |
| GDAP1   | 42.6575535390785 | 44.5884811528117 | 54.3068448962404 | 43.074472921841  |
|         | 52.6922486991742 | 53.63657997649   | 41.9393838138203 | 41.3012916486748 |
|         | 45.1569741609597 | 46.441301934328  | 39.9586075662602 | 44.8372404608604 |
| GDAP1L1 | 44.1294459089314 | 44.8529259387308 | 45.3974838013476 |                  |
|         | 40.9607305725196 | 34.9062568194127 | 39.6251842352088 | 43.6753843488695 |
|         | 42.2577689927563 | 44.7058233759912 | 41.9666541498638 | 35.6970528713709 |
|         | 38.6454098044474 |                  |                  |                  |
| GDAP2   | 83.1614238528477 | 79.2185250088688 | 70.0059240383657 | 78.270329450618  |
|         | 78.9088042058577 | 56.7429967489965 | 77.4046818339539 | 83.1702007661831 |
|         | 88.5564369981649 | 78.839411865787  | 68.7091708087448 | 63.6254894053045 |
| GDE1    | 176.341212868114 | 244.907057340556 | 235.315897087189 | 169.144145421022 |
|         | 173.357715186701 | 203.497070457832 | 230.444295657577 | 275.811139268285 |
|         | 207.726011653345 | 240.217589414972 | 234.8262403783   | 301.025314855652 |
| GDF1    | 41.7397731376692 | 38.1713217245067 | 37.8386378737561 | 38.1392356671704 |
|         | 42.0709558258414 | 39.0648733099061 | 41.253645578517  | 41.9315419791594 |
|         | 39.8984580390722 | 40.0599807618105 | 41.0808257270221 | 37.5236834932416 |
| GDF10   | 47.9175508887533 | 34.9262464079777 | 33.6816578730693 | 41.5464765641928 |
|         | 40.0599807618105 | 52.1024135605001 | 45.7452456977857 | 43.1567024035183 |
|         | 40.8970401536578 | 39.7835513496873 | 42.2618615571566 | 41.863927676552  |
| GDF11   | 33.7777950030073 | 31.6295801599123 | 31.3901365951213 | 36.4564050256915 |
|         | 36.3390947880186 | 31.7413650507468 | 34.0777108441756 | 32.8834169462007 |
|         | 37.5469247328848 | 31.3901365951213 | 30.9159908723475 | 35.9604262434141 |
| GDF15   | 684.865133028228 | 3838.19449971537 | 175.056828374791 | 157.518879763075 |
|         | 1468.75291542154 | 237.974766880957 | 1237.93130196998 | 3490.63949257581 |
|         | 2018.28984520892 | 2663.19221471348 | 5047.91205452316 | 2650.09507972593 |

|        |                  |                  |                  |                  |
|--------|------------------|------------------|------------------|------------------|
| GDF2   | 41.3387790895716 | 39.1982470626863 | 43.5710871617107 | 43.074472921841  |
|        | 40.0599807618105 | 40.650742261428  | 40.4359177791566 | 44.797320243931  |
|        | 38.9006788676407 | 42.5664883002833 | 44.2142581488029 | 44.6484005362281 |
| GDF3   | 41.1523487516364 | 45.3486182278177 | 41.9666541498638 | 40.8681871019812 |
|        | 49.5666074434383 | 41.8613406887824 | 35.9058393060637 | 48.5681478665796 |
|        | 44.4395580493118 | 41.8613406887824 | 39.9899430628542 | 40.2669497398702 |
| GDF5   | 42.7150227340364 | 39.7835513496873 | 39.7411455670172 | 41.0726336841311 |
|        | 41.8806343997257 | 39.8455060654531 | 38.941855825269  | 37.6557714476853 |
|        | 38.0213051227859 | 40.6022003765153 | 41.6336636285875 | 41.1554481567603 |
| GDF6   | 43.2135791259317 | 41.0678614026819 | 42.108130037421  | 46.8954576545929 |
|        | 41.1868052124344 | 40.8970401536578 | 41.5464765641928 | 42.157627240486  |
|        | 40.7460990419215 | 36.6396388746561 | 38.956280281655  | 38.0452862258803 |
| GDF7   | 37.8386378737561 | 38.2263227947189 | 40.931294690669  | 41.3027031037343 |
|        | 44.9936360641969 | 40.040778349137  | 39.7576136507593 | 46.5717043290731 |
|        | 38.9006788676407 | 41.3321861371202 | 40.4504608195666 | 43.9541718254769 |
| GDF9   | 44.0328992213727 | 40.148780650831  | 41.437237454134  | 45.0798408927912 |
|        | 46.1804647841331 | 43.1826328292558 | 52.2476631126873 | 48.87875862356   |
|        | 41.7627910693483 | 43.2988017098387 | 43.6629145624937 | 52.4992300612807 |
| GDI1   | 228.054565950253 | 228.571334092678 | 178.400810392873 | 208.30969642805  |
|        | 228.328635242684 | 208.7739716139   | 318.768560912915 | 334.90764380842  |
|        | 134.152059562322 | 365.401746744015 | 356.948763043851 | 237.401487995882 |
| GDI2   | 735.460645553438 | 522.49156295512  | 382.940842652744 | 590.709061039001 |
|        | 562.258108316474 | 492.13077103258  | 534.755211286733 | 666.265306908449 |
|        | 731.071171171638 | 524.047008889711 | 473.688869614777 | 592.989860385203 |
| GDNF   | 36.3087372569546 | 40.7568164083581 | 41.9335763813389 | 40.3589492801501 |
|        | 37.7115233202949 | 38.5655198999985 | 37.8933603299805 | 38.610211769318  |
|        | 40.7493885015617 | 36.8059561571675 | 41.8613406887824 | 36.5474283500601 |
| GDPD1  | 86.2021418088902 | 55.0897019602305 | 65.4137646609535 | 72.5956443098684 |
|        | 72.5559426064896 | 72.4651758215622 | 78.7182388025668 | 127.87945182399  |
|        | 64.6748464612845 | 121.236881661832 | 119.872031126474 | 90.6191520659197 |
| GDPD2  | 42.6036491382658 | 90.1632837282491 | 130.533514998688 | 36.7892997857376 |
|        | 47.5647821785529 | 41.7627910693483 | 43.3262148375525 | 41.3506832276112 |
|        | 65.564930068976  | 43.844855336215  | 41.1638563416981 | 40.7704587752083 |
| GDPD3  | 65.7259084183743 | 103.289476128549 | 63.2936377704897 | 44.4954892619459 |
|        | 53.4751250621694 | 43.7078399718247 | 91.3144101155547 | 339.313853828248 |
|        | 60.7942162859036 | 51.0055825931636 | 61.4800543360853 | 51.5338331947847 |
| GDPD4  | 40.7609952437622 | 42.5269793679335 | 36.9795961564828 | 39.1706564265495 |
|        | 40.8873907150245 | 38.6414316877471 | 45.6042625176633 | 43.6434576713809 |
|        | 42.5406888281114 | 41.3321861371202 | 42.7275315121163 | 39.2469742642337 |
| GDPD5  | 117.612004923867 | 51.7495306734657 | 65.9476039189301 | 89.1290937615998 |
|        | 45.1137938810047 | 84.3755392205436 | 52.561573697155  | 81.1284422173774 |
|        | 51.8083208406279 | 90.9570747667407 | 63.5195937348531 | 67.1675878355908 |
| GEFT   | 41.5421429082231 | 43.4681646416585 | 37.8386378737561 | 39.1350512687938 |
|        | 41.7503755215516 | 52.502055890816  | 44.3440839686558 | 44.5029690493211 |
|        | 43.3165374444543 | 52.0231832690887 | 46.1364790186809 | 47.2131144508464 |
| GEM    | 112.721024337362 | 71.5726787111921 | 54.2059913044076 | 94.9785931907153 |
|        | 70.8288090024328 | 592.989860385203 | 41.645120086609  | 114.623641209561 |
|        | 41.0381860307445 | 65.6165636276827 | 74.7669841575348 | 163.742560819575 |
| GEMIN4 | 305.199674259628 | 331.390452289344 | 294.7772562683   |                  |
|        | 184.087380444203 | 510.379313524019 | 230.09336914921  | 419.054753590648 |
|        | 292.389429869034 | 210.166909564076 | 330.096171705212 | 321.686871145301 |
|        | 258.375785708747 |                  |                  |                  |
| GEMIN5 | 64.7766649630041 | 48.4980626712175 | 76.2533853403813 |                  |
|        | 58.9168466928565 | 85.5362566454799 | 79.4053001255904 | 61.2183034191703 |

66.4207938873541 70.8606919488782 63.3872214856708 61.940656536312  
 70.5322939116406  
 GEMIN6 104.704892803169 89.1382266158262 128.327641457403  
 93.6212502203405 213.590067519021 105.414552529943 182.079641528208  
 174.584330660466 97.7114610828769 86.8691342571214 83.0072253231162  
 128.230543301378  
 GEMIN7 40.5235471987417 38.6414316877471 42.3536549114165  
 37.9230440150891 40.3021896270845 42.808889470973 42.22763273471  
 40.188873541274 40.0403898620771 39.5637454855233 40.4504608195666  
 41.9083581529276  
 GEMIN8 64.2322994035968 67.4477906495278 78.6402083787251  
 43.5627649099623 50.5707478277575 47.8029841385514 80.354283778818  
 59.3923286524971 64.9030399249327 74.6847594297153 72.4325984501758  
 71.9771425105735  
 GEN1 40.8091178323174 47.7246924920997 40.7620472083159 39.0156305603334  
 43.9450023643394 44.812853905056 39.0788811357542 57.3286965007828  
 48.5136862664526 40.8970401536578 36.5675023356094 43.0930293831497  
 GFAP 37.6397652536077 42.6022652963326 43.9450023643394 35.3829784221072  
 39.4693871570028 39.9397419279057 39.1539892144371 42.357910063876  
 40.0403898620771 37.8217989841918 32.775958132716 42.357910063876  
 GFER 34.8099089553046 37.2810767789306 38.7745734037492 31.8431345631453  
 35.3327761997046 33.4492509999281 34.806104801006 39.3709357615493  
 28.768101860452 34.4875013487777 39.6403089864678 33.0217499673686  
 GFI1 58.8224410806741 57.4538469832241 51.0539624358342 68.1992221684165  
 37.5556299264699 41.0582900711341 43.5627649099623 49.085741080241  
 41.863927676552 38.1042454705119 50.5810338885769 43.9541718254769  
 GFI1B 47.1962846565261 45.9266745571724 45.1569741609597 36.6501141438378  
 39.9697332660833 50.0748292497578 52.2476631126873 47.6952179922944  
 45.9227107476843 44.571915452417 46.824299585607 41.1554481567603  
 GFM1 194.395766807005 187.086662645246 190.675425748381 185.924923239764  
 496.163796158189 248.563278344035 189.80672643731 232.147792636393  
 225.960701908311 228.778506556448 287.494740260715 281.602712448925  
 GFM2 45.8108990837624 63.8399092891728 64.847834518734 51.1313686723929  
 56.6557577134933 60.9822577063534 57.9583667603818 48.1591264215184  
 51.9545473262296 45.2023300009435 43.0710577955487 54.4644832805303  
 GFOD1 118.05982513603 60.1685144469519 104.557637353314 202.578421978121  
 87.1109435144663 199.294913752704 40.9157352260901 95.2915739972533  
 79.1576305054224 111.248876636045 150.009352890706 117.052403700291  
 GFOD2 168.288592321667 90.9570747667407 106.058751335133 49.3654837541353  
 85.1661952927159 65.6914955077809 130.211586013657 288.597205372736  
 78.055431384988 83.5069968129733 97.3188285021124 70.5322939116406  
 GFPT1 263.21493129287 172.285394357607 126.485649460666 115.132600341395  
 144.578232267116 103.64431747876 164.312946712409 215.68113524702  
 139.768680518677 98.1835264890769 94.3872450727268 136.998739859195  
 GFPT2 167.578081645481 45.1694246393676 43.5710871617107 160.973602503707  
 55.3100442506299 540.721068846198 50.6774883370457 98.2074490157865  
 44.619512785899 101.197890058764 93.0801307192343 239.885284409329  
 GFRA1 40.3180310664156 41.3177250076876 42.381482941987 39.7938220956242  
 40.6723334103791 51.8762098404619 42.3360569471619 42.3982765397961  
 43.1087085278313 42.8304701368556 42.7815195866158 44.7915315085948  
 GFRA2 67.3816715975056 83.7019398654324 74.6901522573522 91.0346886951891  
 75.6471706262645 181.586195566181 77.7615826856723 89.6313467455698  
 58.4891791448514 84.4349803529132 83.3729277601518 80.4404044229341



|        |                  |                  |                  |                  |
|--------|------------------|------------------|------------------|------------------|
| GFRA3  | 47.8249696958403 | 40.7952353240579 | 48.1331309338997 | 58.0218262176065 |
|        | 113.367264677544 | 75.7502062965698 | 132.24963384417  | 132.3192754634   |
|        | 64.4588422949237 | 42.5664883002833 | 48.2910530887214 | 47.5025821041537 |
| GFRA4  | 50.2203578628217 | 39.6493706695391 | 44.7255207589606 | 42.4061338151892 |
|        | 49.8865955311391 | 42.808889470973  | 44.0687697278114 | 45.642304356051  |
|        | 47.945438269111  | 44.1861590259178 | 42.4580504587581 | 54.1090536870282 |
| GFRAL  | 36.9060997041453 | 39.932537801639  | 39.5954353681031 | 38.042028333747  |
|        | 40.0599807618105 | 40.7616966228404 | 40.6750540874299 | 37.0932890050788 |
|        | 38.6510172759977 | 41.8613406887824 | 36.6603338274678 | 44.1063440402552 |
| GGA1   | 3379.67054115975 | 2934.35616793443 | 2911.10227993347 | 2779.37660132136 |
|        | 2083.69812106867 | 2054.64068255575 | 3234.36469403715 | 3690.00752647453 |
|        | 2225.65559724391 | 3421.24021192326 | 3618.78958408675 | 2921.68921750799 |
| GGA2   | 124.866058211181 | 154.775578306203 | 160.973602503707 | 178.156332261759 |
|        | 130.002385558757 | 120.231435193839 | 79.3861418060845 | 103.856444152519 |
|        | 107.808744445896 | 252.347641176529 | 161.326580647514 | 125.512567429299 |
| GGA3   | 63.3518043114428 | 74.9294208313176 | 76.8521423078922 | 65.2125527940945 |
|        | 82.4164506744    | 63.6894484284172 | 65.524821699432  | 54.0507720792049 |
|        | 74.6590272639023 | 81.0214543140606 | 82.8205269728224 | 69.8505620106065 |
| GGCT   | 388.920739791844 | 218.273094883881 | 127.789065386943 | 90.0942781313264 |
|        | 233.07404514708  | 132.473918053428 | 254.322611819303 | 430.283061862756 |
|        | 205.772128732705 | 91.9919654450652 | 125.07621933584  | 129.014076422249 |
| GGCX   | 80.0113001016496 | 95.7639712596394 | 116.295564219236 | 69.6511571901941 |
|        | 99.6821042055758 | 67.9306669919176 | 97.8309399470621 | 94.1762630490912 |
|        | 118.762101740563 | 71.5948944013406 | 87.8967913380047 | 100.120990656033 |
| GGH    | 100.159565926265 | 186.891912776245 | 104.076098789396 | 102.605473054584 |
|        | 131.156876010639 | 52.4351670989268 | 194.703024752864 | 160.117375210168 |
|        | 239.792011765323 | 54.5641201866931 | 52.3304586399695 | 48.3119523820103 |
| GGN    | 72.9154861179393 | 44.2630383225933 | 41.437237454134  | 40.1804147506786 |
|        | 46.6397391251762 | 40.3357777530419 | 43.9450023643394 | 42.2577689927563 |
|        | 40.8970401536578 | 39.7835513496873 | 40.4504608195666 | 41.1554481567603 |
| GGNBP2 | 447.709872889701 | 454.402224020514 | 426.933064567744 |                  |
|        | 408.991719312986 | 425.435793468733 | 480.13416648493  | 524.972936438175 |
|        | 388.336994961328 | 537.471287449696 | 583.053232396803 | 585.771656887036 |
|        | 571.790034754076 |                  |                  |                  |
| GGPS1  | 119.502912878938 | 116.663501139305 | 179.378838766172 | 119.39177524986  |
|        | 131.766252431636 | 169.554408876006 | 116.080897948094 | 108.025082988807 |
|        | 145.75465017845  | 118.027323513177 | 111.501058276821 | 159.618353114269 |
| GGT1   | 47.6933206236304 | 53.1699994703719 | 45.2689965528388 | 55.9927099883616 |
|        | 44.9272279146193 | 51.294537308199  | 45.2759158146116 | 41.9741368971524 |
|        | 46.3426705495666 | 45.731999237426  | 46.3607182640185 | 42.6350119662243 |
| GGT3P  | 48.1952521496489 | 44.8529259387308 | 42.0621425894624 | 43.1847628331565 |
|        | 39.4693871570028 | 40.8634043028528 | 41.3594868055879 | 43.4544762830742 |
|        | 40.137818555383  | 38.0078357808393 | 43.5710871617107 | 41.4508241771315 |
| GGT5   | 49.9419897484381 | 44.0409178714232 | 48.7039705048129 | 48.309866878365  |
|        | 50.3713170502557 | 48.7781962164988 | 44.8643898647322 | 49.7309743973184 |
|        | 50.1603795873336 | 51.6778366958973 | 50.1649089793069 | 51.0013344286851 |
| GGT6   | 210.437554813031 | 388.580556899321 | 170.619111196551 | 44.550322123994  |
|        | 135.41852974791  | 56.1671440556142 | 268.613247119583 | 201.427008153788 |
|        | 302.083293019113 | 681.474524031866 | 414.539381761279 | 241.599353653369 |
| GGT7   | 36.0144420013819 | 49.1283590719461 | 51.8122261766744 | 40.7481155008596 |
|        | 49.0828761839116 | 42.8598805316863 | 45.4799270968969 | 43.6434576713809 |
|        | 43.5669306063196 | 46.441301934328  | 46.2560238004757 | 47.0130468198828 |

GGTA1 38.5007204246293 35.1224289925572 39.6451483836089 40.4359177791566  
35.7973685350741 44.1737502492846 37.9430145836712 40.831207953647  
36.4476883897928 35.7202909649682 35.860430241131 40.8681871019812  
GGTL3 40.0557788909923 49.9338905397767 52.6275131390249 42.2496337895968  
50.4260283682427 42.808889470973 47.0874209746031 50.628152951493  
48.692302914163 56.685925255591 51.7538628098347 52.0359304386476  
GGTLC1 43.1180113655693 44.2391871310123 46.6025757239946  
44.3425264236664 46.0553319515625 42.357910063876 46.0905079010237  
41.8417024632349 40.4544974307172 42.785429206422 47.2134341420411  
44.5973052166071  
GGTLC2 41.2424637338424 40.6380495994768 41.2365089689635  
69.6511571901941 44.4489662507893 47.0940613507321 48.4859552186772  
37.9837233601316 37.10170285405 38.6454098044474 42.357910063876  
38.2350720635382  
GH1 40.7609952437622 37.0390589468421 40.7222199182322 43.4410741327254  
41.0885562160946 38.8336427948187 43.4885245598939 41.1575777497576  
42.4540072551568 44.7958122466628 44.1148826235374 42.4229201717624  
GH2 40.0557788909923 42.4642390990506 40.6312687664188 37.7146582037126  
40.8873907150245 41.809704036355 39.6229463459737 41.3945375181463  
38.4970433581463 45.2556760873335 39.6403089864678 43.5420658412177  
GHDC 102.044838876428 96.5102825310977 84.3755392205436 97.8309399470621  
116.362441774156 108.493693862509 113.692418102755 107.094663242259  
139.905295316081 187.086662645246 182.866502637283 90.1632837282491  
GHITM 836.472724085903 1180.7204565402 1060.64261592822 1296.28036613191  
954.116675685628 1673.60994518271 1450.53108586858 1050.05355467301  
968.405745860353 1387.28483887704 1273.52492984569 1839.09068171097  
GHR 52.0299937917925 42.6022652963326 40.4882741869718 39.3750969348308  
45.4751076037511 133.96497573455 38.4005795891396 54.5125550937898  
49.5539622682049 120.60052672409 92.2772139468085 62.7669079605627  
GHRH 33.3307770183871 42.4493032770053 41.528370959196 45.7397504535169  
35.9058393060637 41.3553369544097 35.2163900400329 39.2672712041774  
41.9635525160083 43.2988017098387 43.4709415392696 44.2527566343661  
GHRHR 37.2865372090014 33.876326795925 36.4098694708483 37.7469621225553  
35.7112361794431 37.3207811788937 36.3194282084339 32.6817359372544  
40.0403898620771 34.6720534245631 32.2989067914223 38.4741160538511  
GHRL 46.3390850717989 52.1062000766427 45.8844325913247 58.5406981871153  
39.9697332660833 41.3553369544097 49.540449125788 41.5464765641928  
37.10170285405 49.5265949137207 39.7342718293432 40.3691324547049  
GHSR 44.0328992213727 38.3874422458351 42.157627240486 43.8002456102021  
45.8669209716694 38.6414316877471 38.1793598983615 41.3012916486748  
46.0633179231318 43.7303813515864 39.6833800000587 44.1861590259178  
GIF 37.2474303302343 41.554942319225 32.7043743065388 39.066284740632  
46.8674366115656 42.9695585740813 38.7337086062875 37.1317006162938  
41.9635525160083 40.7063426028871 38.079222289614 36.064718696392  
GIGYF1 47.2862299990938 47.3536182445315 45.5883690965192  
42.1273928203021 46.9906120932727 41.6590564937735 39.6535880152834  
45.8669209716694 40.7847110517594 51.9547984751408 44.7114813656401  
47.6040671292013  
GIMAP1 38.957687788868 40.5400384479766 41.437237454134  
42.0102671859606 46.1804647841331 38.8336427948187 39.8695929627783  
40.1474543172332 41.863927676552 38.957687788868 45.6348103033479  
47.1060577218993  
GIMAP2 45.3872406432794 42.2900457798748 46.7800033479223  
58.106070377898 37.6527901109005 41.5132248356707 45.223075311113

40.5158867964016 53.8716214229685 46.5650556481721 42.5426057453993  
46.7182294568603  
GIMAP4 257.993462737264 223.397586938079 307.002236094206  
918.083610591772 130.515102593803 365.459728613746 108.558977253184  
134.085457101528 57.9713749600418 192.240593720489 214.484877083166  
167.999042735556  
GIMAP5 98.4084364053686 91.8207081349104 97.0516272072238  
260.824949424185 58.2780916793348 111.939677225005 41.8315602975157  
60.9009676344258 45.0997987980157 55.1089864632456 88.6460475038549  
63.7744603935682  
GIMAP6 57.5685357492202 75.633664798698 67.40251451399  
123.493308132159 50.7116312517035 77.8490019489375 44.6809101024392  
45.063792968927 50.7258407289028 67.1278109419819 69.2787430208317  
70.2021753365478  
GIMAP7 49.8472708021525 68.1040271620925 56.9958049366454  
134.952392466784 48.5000946421718 72.7934987008399 40.2601451506332  
47.5439485437351 40.0403898620771 67.9922604709859 79.8701900696361  
72.0334593545916  
GIMAP8 74.3766944386886 84.2880616879945 94.2275161759277  
182.219366179899 58.2780916793348 117.250114037308 47.2927436772465  
60.1796637353976 47.9035532886869 75.0665411373616 90.807818984128  
71.0340758556049  
GINS1 37.3463875295726 39.6995529770239 40.931294690669 34.7266486944713  
37.7576900881741 34.9849896310235 42.0605906240248 40.931294690669  
40.3316153483289 39.6719190054379 36.5359455830388 40.9683275553869  
GINS2 170.223657280542 137.551493752877 165.613176704286 49.5424425850549  
212.688298502868 66.7278011183421 468.98857415608 156.276838862671  
386.372142079981 55.7930787690756 56.6884575165011 138.972884942374  
GINS3 126.253578620746 86.8262463672891 142.262349841307 70.7202372217584  
71.8706847571669 74.9006142438341 160.117375210168 95.9391851122771  
136.644759501653 83.764882413379 84.9601800557888 98.7331384143685  
GINS4 87.1735705257803 104.650071846586 68.0649030501515 65.7321440516177  
122.904323796484 66.7278011183421 161.929470244265 413.41645422004  
69.4677195088043 53.6429962450784 51.2318935933116 56.1136936405786  
GIP 50.1533437545239 41.159706131351 37.4642807402741 43.1847628331565  
42.9090346219023 42.4580504587581 41.8315602975157 39.7509165247419  
37.5469247328848 41.2276963324981 38.079222289614 40.0557788909923  
GIPC1 568.371815312895 712.80113322987 738.66912772732 195.635797217403  
667.583623414832 303.239819890428 529.210992541911 759.184121753305  
858.975085087497 592.010988342149 644.924175130155 425.435793468733  
GIPC2 41.9918605927928 39.3999056968598 40.439898672334 40.5858746708995  
36.2048942610546 37.33030683349 38.7745734037492 38.745552403895  
40.5912213523345 35.1266109638107 40.4094901248527 38.5921548841176  
GIPC3 34.0467249875782 39.3999056968598 38.2280071951674 36.4564050256915  
41.2740822675592 43.1826328292558 38.4005795891396 36.7460922671619  
37.2810767789306 40.6022003765153 34.3633615460307 36.6603338274678  
GIPR 37.8386378737561 36.6968906669565 42.9104454767916 35.6928955245309  
41.7929491793697 37.9003288112261 38.4005795891396 41.8417024632349  
44.1519466943185 49.1928206164702 38.745552403895 36.9976231206067  
GIT1 72.4094549259929 70.5171002055327 77.0301627655229 84.6435656850129  
85.6236091398006 53.565717255469 100.756165194192 127.008218054726  
101.103458852775 103.001949900533 79.5743379965984 58.6481644777552

|       |                  |                  |                  |                  |
|-------|------------------|------------------|------------------|------------------|
| GIT2  | 62.2150049214174 | 62.3983214098965 | 69.303129494807  | 91.3475300950304 |
|       | 64.6374507338031 | 64.720130807316  | 68.4380822448123 | 48.272324215504  |
|       | 69.2001494999588 | 52.0329620305531 | 55.2152456171699 | 63.8949010662614 |
| GIYD1 | 79.2665546280232 | 85.0308877626746 | 149.185115531381 | 110.25582862843  |
|       | 121.696160351886 | 71.0369238830779 | 81.9504925867759 | 179.874652000664 |
|       | 98.3158011081832 | 87.7918574811458 | 83.0554837248934 | 68.188634555556  |
| GIYD2 | 46.8954576545929 | 44.8044806324595 | 60.5390917151449 | 46.546116650292  |
|       | 49.8304479381623 | 43.4263583096036 | 41.9918605927928 | 54.3820590274321 |
|       | 49.0986627051784 | 42.2614524730856 | 44.6286581923295 | 47.1060577218993 |
| GJA1  | 613.50943414129  | 109.844156801015 | 214.927272114101 | 181.488068017883 |
|       | 241.599353653369 | 279.521995263196 | 119.905655993777 | 167.746168796779 |
|       | 434.223722811041 | 380.736562250846 | 371.709014310561 | 670.271164195182 |
| GJA10 | 39.3709357615493 | 37.920964499903  | 41.528370959196  | 39.066284740632  |
|       | 37.7576900881741 | 44.3648993568405 | 39.1539892144371 | 36.5393857306744 |
|       | 39.5806465938526 | 41.8613406887824 | 40.6373400186325 | 42.8864415494484 |
| GJA3  | 41.8409927585705 | 41.159706131351  | 41.6977706798234 | 41.4727452533295 |
|       | 37.0526522140242 | 41.0012755104374 | 43.7585538437696 | 47.7508139534968 |
|       | 38.1169703906207 | 42.9358255168086 | 44.1533327883807 | 41.2905987859365 |
| GJA4  | 81.9258201510475 | 126.253578620746 | 201.163076338483 | 108.330778160202 |
|       | 84.8751572193902 | 88.9738853594498 | 60.9648845690177 | 87.9468208580228 |
|       | 48.6494451061637 | 57.4665857273093 | 53.2083147523758 | 63.7744603935682 |
| GJA5  | 53.3059058105836 | 46.3370338074996 | 49.6347864008749 | 41.8778873678551 |
|       | 47.2862299990937 | 44.9896851005259 | 44.1407835440612 | 45.5842286511645 |
|       | 40.9512974748357 | 42.1317134987795 | 42.1537476443423 | 43.3744503319109 |
| GJA8  | 46.263826584899  | 39.6995529770239 | 42.157627240486  | 43.1847628331565 |
|       | 43.7517118200398 | 43.1826328292558 | 44.8643898647322 | 38.1835938174625 |
|       | 48.5792058061372 | 45.1569741609597 | 48.9754340235127 | 45.2783024981315 |
| GJA9  | 40.3478825593224 | 40.3384318592985 | 43.3085358214154 | 35.49696651597   |
|       | 39.859345745831  | 38.5252456306656 | 41.5817737564592 | 35.1738399826814 |
|       | 49.7336769474446 | 39.5637454855233 | 45.1432412071268 | 45.6692241948108 |
| GJB1  | 42.7150227340364 | 39.8695929627783 | 38.4043916290561 | 44.4367387274922 |
|       | 42.9090346219023 | 41.0582900711341 | 39.2533668167483 | 39.1652965788406 |
|       | 41.7627910693483 | 40.6022003765153 | 39.8184668132023 | 41.2437378488025 |
| GJB2  | 1223.01485352248 | 550.642253702646 | 1718.44944271916 | 172.39907939484  |
|       | 878.863554510943 | 127.596368103014 | 208.97126697486  | 277.164276391513 |
|       | 530.996217072759 | 83.6524523974491 | 73.4853298204744 | 231.637751095711 |
| GJB3  | 59.4346711476105 | 56.6146179789815 | 69.11736279512   | 40.4359177791566 |
|       | 55.7575080755355 | 40.5281496800812 | 56.5914743235484 | 51.213375233854  |
|       | 84.8443836237906 | 78.270329450618  | 56.9733113918431 | 57.9941756686635 |
| GJB4  | 48.8941062980393 | 63.5932443357808 | 56.1434024065079 | 36.9912468186322 |
|       | 38.6454098044474 | 41.7627910693483 | 32.7676164492555 | 45.4757965005055 |
|       | 44.3440839686558 | 39.1621898366355 | 44.1148826235374 | 53.840976437122  |
| GJB5  | 41.5421429082231 | 40.8880530359822 | 52.7005092555102 | 36.3604951341921 |
|       | 33.143488395779  | 37.9951997351435 | 40.9157352260901 | 36.9355798143571 |
|       | 40.4997186069494 | 34.3674468322242 | 43.3085358214154 | 41.3481355128089 |
| GJB6  | 51.8122261766744 | 264.407051461506 | 338.586852166449 | 37.3600014814388 |
|       | 303.670126704469 | 70.5025097213784 | 126.389908470189 | 89.9227845135785 |
|       | 246.351606918353 | 58.2167393576361 | 59.9199304173784 | 79.990130381874  |
| GJB7  | 47.6397712007919 | 64.9959712888709 | 41.9666541498638 | 37.5382094267692 |
|       | 55.1563703466328 | 41.7627910693483 | 51.7714254834195 | 52.5909491535773 |
|       | 54.7033747046992 | 39.4710743516517 | 49.6706535876636 | 41.3481355128089 |
| GJC1  | 2803.11698341125 | 1634.61795848352 | 2357.96534075689 | 2354.00192115549 |
|       | 1640.74027400791 | 1208.33498233518 | 2545.03032507597 | 3562.96193568469 |
|       | 1585.90718459092 | 3379.67054115975 | 3244.27810937143 | 2663.19221471348 |

|         |                  |                  |                  |                  |
|---------|------------------|------------------|------------------|------------------|
| GJC2    | 70.8288090024328 | 61.9459245072385 | 165.992057520727 | 91.0346886951891 |
|         | 54.4586176399381 | 229.745018977185 | 43.4544762830742 | 64.4156641487994 |
|         | 44.0519245668737 | 97.2865629929716 | 126.375315221007 | 103.233768723364 |
| GJC3    | 37.6397652536077 | 38.6414316877471 | 37.8386378737561 | 38.5252456306656 |
|         | 34.9062568194127 | 45.0882356578404 | 35.8227939208521 | 41.3506832276112 |
|         | 46.3203995372658 | 35.8304004211528 | 34.174642681781  | 40.2669497398702 |
| GJD2    | 35.2267149016596 | 35.3307157989724 | 37.2838080935695 | 28.6786952763294 |
|         | 36.9702228618069 | 38.3418933808844 | 37.3799542961839 | 40.4359177791566 |
|         | 34.9428206949566 | 34.1648535095605 | 35.046946054314  | 31.1733235029813 |
| GJD3    | 75.2475238554276 | 381.6928205836   | 98.8595497262968 | 72.89602312859   |
|         | 67.0163226819964 | 59.3618843678775 | 89.9284109077375 | 62.4219686957673 |
|         | 82.0081006332668 | 64.7269156363245 | 83.7392835102145 | 52.5752569429057 |
| GJD4    | 39.7576136507593 | 35.6434124419782 | 34.8956628705329 | 37.7469621225553 |
|         | 39.0564222526273 | 40.1428591998404 | 34.5633623842083 | 42.9301944191913 |
|         | 39.6609238036815 | 38.0078357808393 | 40.9157352260901 | 36.2582325396375 |
| GK      | 96.2248868829355 | 118.923419920947 | 119.979854891563 | 1366.59129560817 |
|         | 104.754762973117 | 84.1922656126304 | 209.658186168638 | 192.356440003154 |
|         | 129.754481922118 | 49.5635427311883 | 50.133362781069  | 53.840976437122  |
| GK2     | 102.513192587614 | 87.0685571351947 | 93.4180535865914 | 108.025082988807 |
|         | 81.7765447802116 | 89.680151549258  | 94.3537052300317 | 103.366147685418 |
|         | 96.2385885003071 | 72.834275688835  | 87.7844808613265 | 73.9192243586276 |
| GK5     | 54.931538325692  | 67.8208976798364 | 71.0340758556049 | 64.898351831341  |
|         | 88.6368226476614 | 66.295597720304  | 59.5205055437765 | 67.8061298261394 |
|         | 59.3580517977711 | 71.5032996449402 | 70.3381994440425 | 78.8968326770219 |
| GKAP1   | 37.3463875295726 | 46.0023068797812 | 42.2577689927563 | 39.6292788039793 |
|         | 45.8051846088552 | 45.8325181856483 | 50.3519150282938 | 40.6171774724171 |
|         | 39.5806465938526 | 45.7911932481722 | 43.0016969050339 | 44.7401523707775 |
| GKN1    | 42.1537476443423 | 62.6236991757723 | 39.0775870687758 | 34.9221408381038 |
|         | 46.7508829977587 | 41.8613406887824 | 37.6036146841933 | 40.2382908228517 |
|         | 41.074824727477  | 139.414044294473 | 47.4630625313159 | 224.450710664296 |
| GKN2    | 36.8072833828297 | 43.4396866157171 | 37.1643693306382 | 42.5664883002833 |
|         | 44.5668141895992 | 40.7616966228404 | 37.830876898596  | 42.9301944191913 |
|         | 41.4636047919453 | 35.6208308220005 | 45.8180710486329 | 44.1452943804044 |
| GLA     | 274.134201700259 | 734.705859548078 | 139.08163074096  | 1294.42501356365 |
|         | 415.251775687794 | 208.7739716139   | 270.89711217076  | 540.721068846198 |
|         | 228.469654751393 | 183.311305255895 | 167.05554959607  | 198.129308943666 |
| GLB1    | 229.379918828848 | 434.223722811041 | 388.132295362791 | 478.110586929303 |
|         | 588.064524478384 | 258.120500906788 | 352.917938567734 | 301.941928552396 |
|         | 516.349618186681 | 233.72882333861  | 178.249889756228 | 262.534449975056 |
| GLB1L   | 64.0759817636265 | 46.5650556481721 | 46.4569566520107 | 77.3864518736634 |
|         | 44.147557390293  | 57.2767879969284 | 52.7002314230604 | 49.5185112777773 |
|         | 47.27543600687   | 59.1496467460507 | 54.0374522273907 | 58.2879293130296 |
| GLB1L2  | 161.573327074375 | 66.7256057011273 | 86.6186787663248 |                  |
|         | 46.614092935749  | 135.737771384104 | 71.9329028989527 | 63.5738862549306 |
|         | 174.416924448198 | 72.6675345946258 | 83.6524523974491 | 61.3529667465225 |
|         | 75.4053820110486 |                  |                  |                  |
| GLCCII1 | 62.4317959077388 | 71.5249259772583 | 63.5107036952143 |                  |
|         | 121.204795052893 | 77.3931945683613 | 53.2046867327331 | 52.0942589368478 |
|         | 56.6910078150745 | 70.2541961995753 | 62.1035858593388 | 56.3106156221316 |
|         | 59.7999569757275 |                  |                  |                  |
| GLCE    | 106.878946016737 | 71.6537776654915 | 63.3544794716167 | 103.139459009593 |
|         | 124.903031106573 | 107.148000219752 | 85.5027511448958 | 115.577618925646 |
|         | 143.251956814524 | 127.49459343016  | 131.319040057576 | 116.927619635255 |

|          |                  |                  |                  |                  |
|----------|------------------|------------------|------------------|------------------|
| GLDC     | 44.6231541342    | 49.4982025424177 | 39.3709357615493 | 50.8567345921473 |
|          | 50.2163892855092 | 36.3845892764084 | 87.0685571351947 | 63.3768687067745 |
|          | 47.3791873993182 | 190.375732394043 | 197.040881690021 | 137.239944506217 |
| GLDN     | 50.379587451669  | 54.9392038576957 | 54.3554233228353 | 82.2766822827861 |
|          | 43.1252272136667 | 50.0748292497578 | 55.4004611309636 | 56.5914743235484 |
|          | 42.5406888281114 | 218.056839407813 | 119.070289990926 | 114.488672372067 |
| GLE1     | 134.62138052303  | 151.740176274202 | 90.6516730646251 | 111.186223357396 |
|          | 96.5615807039306 | 111.404796541459 | 142.172292334093 | 105.822362552251 |
|          | 106.907589984092 | 119.015431849218 | 132.679840262941 | 117.934830767297 |
| GLG1     | 1115.27580736237 | 631.632335640448 | 999.496354673223 | 797.019657306322 |
|          | 767.921811623919 | 663.372296297652 | 461.394007153992 | 1093.04440713629 |
|          | 884.036280777358 | 962.079396754147 | 841.316771679857 | 663.904584382358 |
| GLI1     | 61.356483470053  | 54.2445399731644 | 66.0411740221276 | 50.5310598656998 |
|          | 72.5027069303875 | 55.9351706773613 | 78.1623301184313 | 54.0507720792049 |
|          | 60.5608545741456 | 69.1623287497421 | 65.088713927995  | 57.0524725494273 |
| GLI2     | 45.9090659324223 | 43.4396866157171 | 39.3709357615493 | 40.1804147506786 |
|          | 37.6527901109005 | 52.7156971154405 | 38.7337086062875 | 44.2159020605784 |
|          | 42.2577689927563 | 47.611018474151  | 44.553780984244  | 39.1553169409075 |
| GLI3     | 64.7766649630041 | 48.4980626712175 | 70.2577825186943 | 55.0604256312495 |
|          | 44.9936360641969 | 74.0995052892511 | 39.1539892144371 | 51.6660481331154 |
|          | 71.1894129030602 | 80.191847692094  | 87.3342335690393 | 66.295597720304  |
| GLI4     | 52.7570461169969 | 79.5838979704243 | 101.131391476546 | 47.481302504066  |
|          | 92.6736029146947 | 62.4450952595811 | 56.4809146784765 | 59.9968592852122 |
|          | 97.5394336319916 | 81.1925839235551 | 77.2834482217973 | 65.2125527940945 |
| GLIPR1   | 92.3659612653822 | 68.7826057564876 | 60.5678281953819 |                  |
|          | 337.441212908704 | 94.6432868887401 | 130.02102880365  | 57.6643188499117 |
|          | 74.8893925448138 | 51.9545473262296 | 57.5713378330876 | 57.0154839296649 |
|          | 72.0334593545916 |                  |                  |                  |
| GLIPR1L1 | 43.3638918705225 | 46.4385386401326 | 46.9040704638073 |                  |
|          | 40.646702696033  | 41.2740822675592 | 43.1826328292558 | 39.6535880152834 |
|          | 46.2779564481158 | 42.4540072551568 | 45.5776159432079 | 44.8872784170036 |
|          | 45.0985088502363 |                  |                  |                  |
| GLIPR1L2 | 40.0557788909923 | 40.6380495994768 | 50.8303921211581 |                  |
|          | 47.0874209746031 | 35.9894133432376 | 38.9378717994178 | 40.4359177791566 |
|          | 39.7509165247419 | 40.4997186069494 | 45.2556760873335 | 40.1742127891824 |
|          | 43.6753843488695 |                  |                  |                  |
| GLIPR2   | 574.14982128922  | 222.01145815859  | 235.047133588022 |                  |
|          | 1645.71527614542 | 169.693594531146 | 1050.05355467301 | 369.451882513347 |
|          | 415.477167615547 | 115.954295099681 | 790.786577596971 | 610.502562878788 |
|          | 474.379113836506 |                  |                  |                  |
| GLIS1    | 40.4639532172338 | 42.9358255168086 | 36.6522278218553 | 40.1804147506786 |
|          | 39.3667161654772 | 42.357910063876  | 41.3594868055879 | 42.2577689927563 |
|          | 42.9020321355927 | 41.1222709786153 | 40.547835538778  | 40.8681871019812 |
| GLIS2    | 38.0089018744739 | 41.9894412416874 | 38.1421709520616 | 39.7411455670172 |
|          | 44.2607789091176 | 30.8824580894159 | 42.4939802311136 | 45.3872406432794 |
|          | 40.8970401536578 | 44.6918600441328 | 35.046946054314  | 41.1554481567603 |
| GLIS3    | 52.6554629843702 | 38.4866431306822 | 43.8249538325648 | 51.1470623296569 |
|          | 45.6895223823001 | 45.1873487463472 | 57.0178321687063 | 64.1675023456571 |
|          | 44.206798768753  | 53.4751250621694 | 55.0024069676601 | 56.1875519519366 |
| GLMN     | 97.5464355320239 | 80.0502531022254 | 74.8071157013401 | 61.5515639412892 |
|          | 92.6036872789676 | 77.2048580540589 | 93.9472621843566 | 113.528908699366 |
|          | 78.3082773071531 | 88.7461361855771 | 77.8669914727921 | 78.4641751788842 |

|         |                  |                  |                  |                  |
|---------|------------------|------------------|------------------|------------------|
| GLO1    | 1031.94541988402 | 1164.71243740122 | 809.577874019028 | 575.057786209737 |
|         | 2039.89728774097 | 1114.7177106695  | 1369.13346566895 | 1004.28134410536 |
|         | 1050.05355467301 | 527.97309138633  | 600.34379987143  | 1051.58050264114 |
| GL0D4   | 252.870708814507 | 269.963186760811 | 237.754990288051 | 203.152852313746 |
|         | 209.281870980564 | 237.632703283663 | 301.941928552396 | 233.07404514708  |
|         | 230.73977644867  | 284.868613843826 | 266.439343650315 | 276.267583952979 |
| GL0D5   | 38.7537364570873 | 37.10170285405   | 40.301483914446  | 35.6928955245309 |
|         | 37.2567512265363 | 38.4330755397458 | 43.1931731665131 | 31.5766875248365 |
|         | 35.0305278582179 | 40.1179210534118 | 45.310660704531  | 40.6614700944853 |
| GLP1R   | 39.8662795144616 | 44.5152708955623 | 46.9040704638073 | 43.6726153508978 |
|         | 44.8897737954573 | 37.4782441311626 | 41.4742337714895 | 47.6952179922944 |
|         | 42.0621425894624 | 51.2318935933116 | 41.8168470823451 | 42.57175366709   |
| GLP2R   | 39.9697332660833 | 40.9731067463382 | 39.9101908547397 | 39.1706564265495 |
|         | 43.7517118200398 | 56.9320717885002 | 40.3302268293707 | 36.2539950294089 |
|         | 43.6670755115848 | 42.6793753550854 | 37.9230440150891 | 39.3575468494941 |
| GLRA1   | 36.9060997041453 | 47.765848710116  | 38.7745734037492 | 45.1944222548351 |
|         | 41.2740822675592 | 38.1169703906207 | 41.1507980856436 | 39.2672712041774 |
|         | 44.4395580493118 | 43.7303813515864 | 45.2265319826548 | 42.0424641526302 |
| GLRA2   | 37.3463875295726 | 42.0709558258414 | 36.9795961564828 | 43.3078542962968 |
|         | 38.9496515344837 | 38.4330755397458 | 38.941855825269  | 39.3709357615493 |
|         | 39.7537274655115 | 36.6893251782922 | 36.2435874904689 | 42.7782216342806 |
| GLRA3   | 41.678190413467  | 38.7344853699576 | 41.4613628725541 | 39.6833800000587 |
|         | 40.7779767565889 | 41.2098211956301 | 36.5729485312886 | 38.079222289614  |
|         | 40.5912213523345 | 43.9450023643394 | 43.0971787292711 | 39.4830039788612 |
| GLRB    | 63.7818442618767 | 47.5647821785529 | 38.9790184198145 | 45.0798408927912 |
|         | 45.3675390992851 | 46.574682061365  | 78.6402083787251 | 45.0972184964705 |
|         | 62.7205631511304 | 49.8393069675192 | 51.0492389286271 | 53.0446815750355 |
| GLRX    | 96.2248868829355 | 78.1623301184313 | 153.940127525369 | 407.063375756017 |
|         | 62.6860949544223 | 141.043326064913 | 67.6767845246581 | 114.342447939197 |
|         | 59.198088069573  | 81.7171463878604 | 78.1351673826829 | 135.012695962236 |
| GLRX2   | 58.8987159047296 | 63.1394716239975 | 76.2193772627406 | 69.9101676350298 |
|         | 72.983338488605  | 64.4156641487994 | 77.1521355570024 | 53.838484549134  |
|         | 76.6027293497456 | 53.8803543493797 | 59.5830868881343 | 64.863894209343  |
| GLRX5   | 1440.41726370246 | 767.489657259345 | 827.365231733511 | 573.394745674984 |
|         | 1416.47763911039 | 1204.34388579291 | 1027.59400018637 | 1372.51401036753 |
|         | 1291.71781703042 | 787.671342652389 | 885.224377292125 | 905.76958446454  |
| GLS     | 143.084029849218 | 93.6717518147993 | 112.159199477006 | 146.573018487871 |
|         | 63.686652234709  | 100.650129064849 | 60.7992483126292 | 77.0262811825953 |
|         | 95.4942268742467 | 143.053774297331 | 112.881899194726 | 179.756604242873 |
| GLS2    | 44.1737502492846 | 48.6447083765118 | 45.4634652319753 | 40.7481155008596 |
|         | 44.6202070855297 | 40.4753617660107 | 44.2166118829877 | 41.7877325563821 |
|         | 55.1804535845496 | 49.5635427311883 | 43.1724740315182 | 41.7575097298927 |
| GLT1D1  | 38.304249186058  | 41.8848959280916 | 37.1643693306382 |                  |
|         | 35.8472302065546 | 43.2484996523549 | 37.1317006162938 | 34.9344532055397 |
|         | 32.6039814489621 | 37.4540772310118 | 34.8137085420423 | 37.2892641289258 |
|         | 40.2669497398702 |                  |                  |                  |
| GLT25D1 | 913.704049709264 | 444.858305070415 | 565.72800641089  |                  |
|         | 868.899376368472 | 1362.12587130194 | 588.972273484465 | 461.607803139448 |
|         | 549.54346533588  | 429.854222129819 | 428.206419080492 | 440.351682914344 |
|         | 343.94159167652  |                  |                  |                  |
| GLT25D2 | 42.3433931248155 | 42.2577689927563 | 40.5734458834617 |                  |
|         | 50.2163892855092 | 44.147557390293  | 73.5743059777365 | 41.706879587091  |
|         | 40.7311497914871 | 59.5093038629766 | 81.2992152187529 | 57.6171094774963 |
|         | 46.1592873342534 |                  |                  |                  |

GLT6D1 42.6036491382658 43.5873188565519 42.3536549114165  
39.2780515621926 47.8075998240396 39.0266821712099 40.5585676679482  
36.7460922671619 42.9020321355927 44.3648993568405 39.6403089864678  
42.9887069977696  
GLT8D1 49.3067361345568 49.3172204533818 53.2046867327331  
42.6222445667107 61.3851695159988 50.9724155054821 45.5506835119207  
55.2544637845647 54.6183681000147 46.3635803515159 50.133362781069  
52.5353664902258  
GLT8D2 332.933704863586 84.1224653052549 54.9071823326024  
169.99300253813 117.689172019617 362.123479430887 44.2166118829877  
108.366007746533 40.8970401536578 135.007055711266 125.07621933584  
81.8983491901699  
GLT8D3 73.0970339739187 81.2801740824235 94.3953345963359  
75.4466520363487 79.5175547131776 65.6914955077809 116.74427460886  
72.3822545261582 108.815245119101 136.461760992832 134.994839576312  
117.823678167648  
GLT8D4 40.5654775358427 40.3384318592985 38.2280071951674  
36.4564050256915 47.0954207417646 42.157627240486 39.2533668167483  
40.3357777530419 38.7298222155532 38.957687788868 35.046946054314  
44.7401523707775  
GLTP 1058.61208471961 3391.65926812276 1864.63057767867 807.620534408416  
1375.14388134842 811.142611128461 1413.36279821142 1470.84169670955  
1652.85734308754 1881.7281441986 1566.12726152736 1164.71243740122  
GLTPD1 80.7462144785541 86.1924491308234 76.450993090133  
45.4634652319753 105.825228126465 57.1752846228778 116.434267173815  
110.599131324937 95.9999165639785 85.1950626054282 80.6550905475507  
63.8558858499025  
GLTPD2 41.0608773166058 39.7835513496873 38.1421709520616  
41.5464765641928 36.4434672195785 43.0860383229288 45.3597029614942  
40.5158867964016 44.1519466943185 40.5090849993014 38.8507804383261  
34.806104801006  
GLTSCR1 114.148080724618 122.203872796773 125.62281563325  
73.3725472767369 168.11088055793 90.407200101342 86.6798536307388  
75.8976034525022 133.074560812703 70.2565873027242 78.3542840447759  
83.7019398654324  
GLTSCR2 3001.25236839028 3253.86278287661 4148.07163380544  
2002.0536042686 3869.93390477952 5601.18872540083 2220.90215179682  
3021.24285327836 3478.67753301901 7235.0789252269 8144.52133665388  
4784.36905964712  
GLUD1 364.337811621248 510.232992765054 638.305455110267 482.5816387921  
478.566247444176 679.810781641519 569.511773053233 728.257836227637  
349.480794966845 871.238169066998 676.672146226382 758.462554576949  
GLUD2 52.310270746917 54.0052948715814 52.3432130135266 73.7124988616836  
53.9074374788981 52.9482338979681 72.8653205184014 50.3082459161777  
55.5751438859404 56.1912096308988 54.113533179847 52.7530873093837  
GLUL 46.9939712192224 46.1749315148684 51.8122261766744 106.771536005741  
44.20782151793 60.6400800519777 56.0515443021293 44.9977782988116  
46.0679399375659 46.0119912782855 47.4870742154624 52.4992300612807  
GLYAT 37.1485601150873 37.0431286518306 38.8403878304539 37.9116800161496  
40.5207392413115 37.7000400506818 37.6527901109005 39.9927637255545  
38.1713217245067 36.1000756050843 39.1982470626863 35.4484652445078  
GLYATL1 41.9407041937973 39.2907645923217 46.0727230219512  
43.8002456102021 41.3755760434934 35.8227939208521 48.1747307200218



|         |                  |                  |                  |                  |
|---------|------------------|------------------|------------------|------------------|
|         | 41.1575777497576 | 45.0997987980157 | 50.5252048155459 | 48.6184776976167 |
|         | 41.9430737035925 |                  |                  |                  |
| GLYATL2 | 40.7609952437622 | 39.5050383901884 | 37.3687900733549 |                  |
|         | 42.2496337895968 | 40.148780650831  | 40.4359177791566 | 42.1607322031054 |
|         | 37.86982638952   | 42.357910063876  | 38.957687788868  | 44.7926323492519 |
|         | 42.8864415494484 |                  |                  |                  |
| GlyBP   | 42.9104454767916 | 45.0115870036541 | 42.3536549114165 | 49.1786207920603 |
|         | 42.4864576619427 | 45.9266745571724 | 44.3440839686558 | 43.1567024035183 |
|         | 45.6582729799009 | 43.844855336215  | 43.844855336215  | 45.0035308952466 |
| GLYCAM1 | 40.9558083259517 | 36.7976562409506 | 39.7411455670172 |                  |
|         | 47.4320009861631 | 40.188873541274  | 43.4215162178364 | 43.3744503319109 |
|         | 42.1887890806988 | 42.8036731479932 | 42.6211340086915 | 42.6913548400127 |
|         | 42.4162492820012 |                  |                  |                  |
| GLYCTK  | 58.5759178381027 | 68.8195659637992 | 75.651446553407  |                  |
|         | 72.4834467838798 | 101.738441694376 | 52.7156971154405 | 87.7107079534841 |
|         | 51.9447450229707 | 72.1591028956359 | 82.2431666775699 | 69.2787430208317 |
|         | 61.6311118308635 |                  |                  |                  |
| gm127   | 38.957687788868  | 45.8669209716694 | 38.5045333213784 | 40.1804147506786 |
|         | 41.9842695818285 | 43.0860383229288 | 42.0605906240248 | 37.7612949798895 |
|         | 42.6366765186182 | 45.7911932481722 | 39.153226699662  | 39.9519547348106 |
| GM2A    | 167.848222139162 | 77.8946473414547 | 166.33117014492  | 247.843927763772 |
|         | 65.0605897122361 | 102.711934290382 | 55.9276266345493 | 135.997802304719 |
|         | 120.001312008518 | 158.478919789334 | 139.385367339095 | 129.268600210689 |
| GMCL1   | 71.6849360818041 | 106.809028844031 | 96.9569547595983 | 83.3905516293346 |
|         | 96.9476136220382 | 73.4122412764173 | 92.0658899997157 | 86.7710020879725 |
|         | 65.2881198932621 | 56.8875898013449 | 67.5963845975985 | 85.5570725984366 |
| GMCL1L  | 39.9697332660833 | 38.5252456306656 | 36.9795961564828 |                  |
|         | 38.745552403895  | 39.1650142708257 | 44.4619248757502 | 38.2933870238743 |
|         | 42.157627240486  | 41.863927676552  | 32.2133093774284 | 36.6298807161755 |
|         | 44.2527566343661 |                  |                  |                  |
| GMDS    | 519.563402444472 | 583.053232396803 | 368.246708866999 | 295.014183084118 |
|         | 1134.52018899688 | 287.981727851442 | 533.820505121067 | 341.97050042695  |
|         | 355.00914527669  | 372.473625569296 | 383.966991071954 | 368.525388695227 |
| GMEB1   | 65.0721641331632 | 86.9032093551446 | 71.2246788429078 | 110.431464700539 |
|         | 91.8935361535002 | 79.1257499539205 | 107.015362116555 | 93.1067450332473 |
|         | 89.9340376539354 | 67.0489032883986 | 76.6232527679845 | 72.7502212566295 |
| GMEB2   | 203.759116151774 | 170.128899555014 | 146.42128243217  | 124.611407530723 |
|         | 167.746168796779 | 149.249181701692 | 193.395549316561 | 199.776860110557 |
|         | 168.492959515167 | 140.484790183918 | 185.54813083393  | 137.132535402637 |
| GMFB    | 502.435496018532 | 367.158502379417 | 238.338646661062 | 580.444451816014 |
|         | 184.50283792606  | 413.067407579649 | 278.067057781084 | 621.012072500314 |
|         | 260.581111456578 | 436.627613548713 | 386.372142079981 | 406.104588997462 |
| GMFG    | 84.1254258487497 | 136.081259669601 | 97.3929166450379 | 490.876152145712 |
|         | 71.5345397102823 | 122.904323796484 | 108.007227281411 | 116.852483297949 |
|         | 47.3791873993182 | 160.53293875611  | 152.555556133364 | 275.314994786888 |
| GMIP    | 94.3674661847143 | 137.424708183613 | 112.60230393988  | 168.11088055793  |
|         | 120.465621774337 | 61.1022920882065 | 91.6978282652998 | 153.165464817911 |
|         | 81.1416376689959 | 93.0626550693989 | 93.2484615907966 | 79.3875629814087 |
| GML     | 34.2180669723984 | 34.9262464079777 | 37.2838080935695 | 43.1847628331565 |
|         | 41.7929491793697 | 36.6996187567892 | 40.4359177791566 | 36.8400213077707 |
|         | 39.4762546236449 | 37.3179578037963 | 39.6403089864678 | 43.5738557773903 |
| GMNN    | 99.6265783263109 | 154.232642598588 | 116.547937420457 | 68.6379135603075 |
|         | 136.429803886927 | 61.2387559102636 | 654.682263833024 | 210.768576894328 |
|         | 142.492693744683 | 113.759627906335 | 86.582851157193  | 132.985150338484 |

|       |                  |                  |                  |                  |
|-------|------------------|------------------|------------------|------------------|
| GMPPA | 284.942182200489 | 163.946447772618 | 211.468527316402 | 270.487135967976 |
|       | 205.806939441015 | 164.62751527755  | 176.43047680293  | 224.373975368936 |
|       | 180.994353525666 | 161.948193932343 | 157.927114480316 | 132.985150338484 |
| GMPPB | 67.8335962843732 | 105.446338599737 | 77.8490019489375 | 108.138395958121 |
|       | 76.0532592222027 | 72.5956443098684 | 140.465247047676 | 76.1769573071745 |
|       | 63.340012816413  | 58.3813211109331 | 71.1894129030602 | 75.1953706943085 |
| GMPR  | 41.6354649482853 | 37.8217989841918 | 48.9944486068347 | 49.1786207920603 |
|       | 68.5888253504788 | 53.565717255469  | 54.4934782594218 | 52.1788489555942 |
|       | 61.8445915808329 | 53.9412154719864 | 49.2206713037152 | 56.1136936405786 |
| GMPR2 | 134.285947677624 | 146.87603018486  | 199.404836798715 | 157.677866955988 |
|       | 151.047739254277 | 127.265200736376 | 106.140215438654 | 100.45351084408  |
|       | 124.22494803053  | 149.494335028498 | 143.278668481091 | 182.685579297058 |
| GNA11 | 340.553073657744 | 401.45848063233  | 369.952313383216 | 171.800185639868 |
|       | 531.36214636517  | 538.290200196057 | 429.983084929605 | 501.585246203512 |
|       | 358.498678171092 | 429.983084929605 | 647.297964303385 | 343.677907141241 |
| GNA12 | 101.759714275976 | 79.4916415027015 | 79.4442697175874 | 163.995560004001 |
|       | 143.173898886465 | 141.808284719109 | 71.3527183280827 | 70.5322939116406 |
|       | 77.7506984396769 | 87.539553421006  | 83.7829283976292 | 97.0254711947754 |
| GNA13 | 175.798140574991 | 152.031470139119 | 143.822560762049 | 442.546348599648 |
|       | 175.259060743495 | 187.422036538629 | 220.621142396402 | 206.676666936979 |
|       | 248.797398220982 | 106.219480656782 | 124.687212034276 | 162.486448421519 |
| GNA14 | 76.2368668439875 | 57.4538469832241 | 51.5292723244077 | 48.665578118898  |
|       | 50.5110359971301 | 69.4214927857472 | 68.878562323012  | 56.5914743235484 |
|       | 62.9922928277769 | 53.0357938671646 | 50.0303076717704 | 64.2769859135548 |
| GNA15 | 305.735573572576 | 663.372296297652 | 654.682263833024 | 1048.98028527123 |
|       | 612.843402058384 | 255.762638489554 | 701.168333137671 | 337.156068385541 |
|       | 906.833938613875 | 411.254448823371 | 313.660064080622 | 504.847507464269 |
| GNAI1 | 43.515290338756  | 56.9312835667828 | 54.3068448962404 | 43.7540438144592 |
|       | 45.1137938810047 | 51.702461863489  | 41.3094485574845 | 43.1567024035183 |
|       | 57.1016072897358 | 64.7598303406649 | 66.0282565447846 | 67.6699686085575 |
| GNAI2 | 592.399245288911 | 798.996494242432 | 846.096424249173 | 1152.55315876935 |
|       | 480.660242705293 | 949.923102632043 | 990.431472174705 | 437.148137705103 |
|       | 540.037371261388 | 713.685405035516 | 814.294297312057 | 527.037018015766 |
| GNAI3 | 97.3929166450379 | 77.9992448636936 | 100.824660338235 | 177.722828589884 |
|       | 91.7629175712824 | 79.1922819549042 | 123.455270940015 | 103.631449539809 |
|       | 132.57180783668  | 102.880267177687 | 97.0348634204639 | 120.02765867291  |
| GNAL  | 41.9823787224629 | 41.8848959280916 | 39.5450079747895 | 44.2222841572272 |
|       | 41.8407088454059 | 47.5733603903505 | 43.2645805835667 | 40.6171774724171 |
|       | 39.8763736543526 | 43.449858008666  | 44.9056256433399 | 50.8812920005251 |
| GNAO1 | 40.6130792100165 | 39.15937777386   | 40.6737160001291 | 41.6186264038868 |
|       | 40.9450021938518 | 51.0120959440979 | 41.4244721780607 | 43.3262148375525 |
|       | 39.5806465938526 | 48.8623729374733 | 45.6895223823001 | 45.5265270192861 |
| GNAQ  | 87.3342335690393 | 86.1924491308234 | 75.1477470681238 | 166.608353896248 |
|       | 87.2282539094452 | 134.749803376372 | 92.3034609409756 | 79.1039287828151 |
|       | 76.1019439127881 | 65.0928075335306 | 68.7091708087448 | 105.515662220161 |
| GNAS  | 994.404707955031 | 1354.50256889331 | 1749.06320703181 | 1019.67015337432 |
|       | 1642.75555340648 | 1470.84169670955 | 1604.80031304031 | 1347.15664445545 |
|       | 1588.70376317303 | 1093.84714207969 | 1303.33517942343 | 1430.73068989193 |
| GNAT1 | 42.3433931248155 | 45.7317208802318 | 49.965271003193  | 48.309866878365  |
|       | 42.2455707947223 | 47.1477056711335 | 46.1634822993009 | 44.9977782988116 |
|       | 44.476519804187  | 41.7405682794166 | 46.8954576545929 | 40.2237056928605 |
| GNAT2 | 48.6621527194963 | 45.4143854024453 | 47.9035532886869 | 46.0228732507872 |
|       | 40.6723334103791 | 41.159706131351  | 40.4359177791566 | 42.9301944191913 |
|       | 40.137818555383  | 35.7202909649682 | 39.7342718293432 | 45.6692241948108 |

|        |                  |                  |                  |                  |
|--------|------------------|------------------|------------------|------------------|
| GNAT3  | 37.8386378737561 | 33.6533600935671 | 37.3404647796601 | 39.5050383901884 |
|        | 42.7489468897708 | 36.2315828396556 | 40.4359177791566 | 41.6466169548846 |
|        | 42.2577689927563 | 37.2686490268265 | 37.9946685306274 | 34.0382693188794 |
| GNAZ   | 32.9174234020987 | 31.3542159583213 | 36.178547300352  | 41.3027031037343 |
|        | 38.1644569189523 | 43.0860383229288 | 37.7136011474903 | 41.8417024632349 |
|        | 34.3842972343227 | 35.6208308220005 | 35.6970528713709 | 43.7672102682067 |
| GNB1   | 1364.06060391538 | 1626.71747158994 | 1493.20520979227 | 1513.74711975248 |
|        | 1506.33570635551 | 1921.48678333837 | 2369.95344896703 | 1580.58484708669 |
|        | 1744.56688411113 | 1704.0522304387  | 1762.93413846062 | 1549.93897368117 |
| GNB1L  | 54.6235981131919 | 61.0144918827511 | 55.094385444315  | 68.4261608261522 |
|        | 72.828269171954  | 51.1621379498014 | 78.6402083787251 | 78.5375244257332 |
|        | 58.8201021345225 | 51.1169368198437 | 62.436851776671  | 53.3059058105836 |
| GNB2   | 103.139459009593 | 114.719721626067 | 137.696331574552 | 134.099684731177 |
|        | 85.4420599474339 | 101.46584765758  | 101.898612603107 | 94.6432868887401 |
|        | 142.066425511614 | 113.26670675749  | 96.2248868829355 | 89.2832797334932 |
| GNB2L1 | 5696.39636379286 | 3634.98300564068 | 6873.84878164654 |                  |
|        | 3905.8371644287  | 5074.07305640514 | 4717.02689540013 | 4858.39551231606 |
|        | 5525.13078364599 | 4482.5285743878  | 6483.09366281532 | 6873.84878164654 |
|        | 6938.87250165681 |                  |                  |                  |
| GNB3   | 46.8954576545929 | 48.6447083765118 | 39.8299340037009 | 42.1273928203021 |
|        | 48.9627346956003 | 44.0804700754786 | 35.6056062164318 | 41.8417024632349 |
|        | 38.6322728994674 | 45.1569741609597 | 45.0589947942306 | 40.5703581862752 |
| GNB4   | 56.657759220121  | 48.3699741879723 | 50.7774722329703 | 119.124583755587 |
|        | 46.0043807840705 | 57.1752846228778 | 48.0283573444179 | 54.8412943008635 |
|        | 41.8197029429821 | 50.4234835272833 | 55.2152456171699 | 48.9906383294199 |
| GNB5   | 43.6706764143908 | 47.2354741623061 | 45.5587966941116 | 40.137818555383  |
|        | 44.4489662507893 | 68.0881175685974 | 64.9072331703985 | 43.781101409552  |
|        | 58.5363098745941 | 45.087888302889  | 58.5363098745941 | 61.6702707724448 |
| GNE    | 167.430013807712 | 80.8285585008048 | 53.0104469636221 | 77.5698542248061 |
|        | 76.3790849853724 | 121.613731804111 | 91.0154871536701 | 84.5055910320032 |
|        | 71.5327770882433 | 106.752660061588 | 107.610858427836 | 190.61997068475  |
| GNG10  | 99.3142021810133 | 102.150058925164 | 102.734042853587 | 275.549982777518 |
|        | 80.4895102121889 | 152.17335005192  | 101.410859084491 | 68.4659783447092 |
|        | 83.1874704625702 | 55.6865353018811 | 68.878562323012  | 175.165302282522 |
| GNG11  | 206.814831223864 | 171.536394606897 | 204.944787289897 | 378.626656077546 |
|        | 181.565843182713 | 714.990611155096 | 69.779139490544  | 156.337202322452 |
|        | 79.7061415085215 | 346.924074555334 | 402.08877403329  | 407.161973433666 |
| GNG12  | 127.072685504735 | 83.2873728545705 | 150.925721934159 | 71.9062462001972 |
|        | 113.866742186841 | 250.308866488702 | 101.549779766678 | 55.421880601441  |
|        | 67.7662831916293 | 57.5713378330876 | 71.3527183280827 | 152.996027678733 |
| GNG13  | 40.8681871019812 | 39.7835513496873 | 42.8270038153139 | 44.6905691366696 |
|        | 38.9496515344837 | 40.8634043028528 | 58.2315917325629 | 39.2672712041774 |
|        | 40.0403898620771 | 42.1622837416589 | 41.0808257270221 | 43.1805016690297 |
| GNG2   | 52.9240098541574 | 53.7332797903102 | 51.9214790114499 | 83.877343750194  |
|        | 54.9249759425252 | 105.525194437454 | 56.7780520416533 | 51.2623287419357 |
|        | 42.8036731479932 | 45.9004543328976 | 51.3103617600342 | 43.0930293831497 |
| GNG3   | 36.3649677956953 | 43.7644428186265 | 38.5045333213784 | 35.6928955245309 |
|        | 38.745552403895  | 40.6507422261428 | 36.08956004634   | 38.3684202018524 |
|        | 40.2274522635576 | 40.2112371512838 | 40.3452320167286 | 34.3409660445447 |
| GNG4   | 88.9589979655541 | 42.1607322031054 | 36.3604951341921 | 40.3180310664156 |
|        | 45.2556760873335 | 44.9896851005259 | 56.0515443021293 | 40.931294690669  |
|        | 47.5564423692142 | 45.5776159432079 | 41.3553369544097 | 40.7704587752083 |

|          |                  |                  |                  |                  |
|----------|------------------|------------------|------------------|------------------|
| GNG5     | 223.826005691932 | 222.617854741466 | 224.976641879383 | 225.589127792587 |
|          | 142.389246750828 | 173.640820092779 | 231.060688044554 | 194.666769955149 |
|          | 98.9712341137316 | 93.3897477314201 | 115.496195377983 | 185.924923239764 |
| GNG7     | 43.844855336215  | 56.463481075522  | 48.8941062980393 | 66.224559122062  |
|          | 104.351256270039 | 141.364814429951 | 41.8315602975157 | 51.6660481331154 |
|          | 44.1519466943185 | 94.4129246851651 | 84.9601800557888 | 60.4872675915085 |
| GNG8     | 41.5421429082231 | 44.0409178714232 | 45.8844325913247 | 41.8778873678551 |
|          | 41.467005949568  | 42.5660695551615 | 39.2533668167483 | 43.0390857698452 |
|          | 43.3744503319109 | 39.0648733099061 | 40.547835538778  | 40.2669497398702 |
| GNGT1    | 40.148780650831  | 48.109747794187  | 35.9305494063137 | 48.9944486068347 |
|          | 38.2496050953547 | 44.6524308640784 | 47.2927436772465 | 48.7814131120945 |
|          | 39.853866204927  | 49.3000844711116 | 47.9942520395434 | 44.6484005362281 |
| GNGT2    | 47.1962846565261 | 43.7644428186265 | 39.4710743516517 | 82.5279746006378 |
|          | 45.6895223823001 | 44.8872784170036 | 46.4388841354122 | 43.0390857698452 |
|          | 42.6366765186182 | 45.3530683538086 | 49.7363778831003 | 46.917149434588  |
| GNL1     | 216.866451320811 | 158.01463829244  | 224.827414462257 | 188.099292617901 |
|          | 203.82788889213  | 180.447835336714 | 196.267504470029 | 157.082769443568 |
|          | 207.380865650247 | 258.30549459038  | 233.692490031492 | 188.767243497644 |
| GNL2     | 659.666977039793 | 483.20917825594  | 395.875593488613 | 440.282299601096 |
|          | 749.49934348018  | 477.023373302787 | 531.869698775629 | 1147.19483787501 |
|          | 444.169882251299 | 338.000998124097 | 376.141477833569 | 432.945510073269 |
| GNL3     | 171.073367662623 | 391.658764737446 | 296.598410253206 | 162.447872391923 |
|          | 429.329962597147 | 205.187554095744 | 361.632211543977 | 394.00931573564  |
|          | 210.255784687052 | 153.42135363926  | 172.574996256912 | 284.105466865264 |
| GNL3L    | 127.352997770688 | 315.799449362526 | 343.016541928592 | 216.1413998895   |
|          | 260.185079572615 | 146.634440537624 | 446.162602155964 | 333.122044191102 |
|          | 120.123385036416 | 151.451107406752 | 215.68113524702  | 197.660480001139 |
| GNL4     | 61.2130609867477 | 49.2050538150106 | 62.6203392459133 | 223.826005691932 |
|          | 41.948762493127  | 46.5557478175976 | 60.9648845690177 | 55.8775622338124 |
|          | 42.2331334096358 | 66.8764304705723 | 51.1055541075029 | 38.4938120203865 |
| GNGT     | 38.6454098044474 | 39.6995529770239 | 46.5650556481721 | 42.357910063876  |
|          | 41.6806984441849 | 38.4330755397458 | 40.5585676679482 | 38.745552403895  |
|          | 41.2870505273664 | 39.6719190054379 | 37.6484782516569 | 36.3454320848591 |
| GNGPAT   | 192.058030454066 | 161.65846687852  | 158.478919789334 | 227.986601498805 |
|          | 192.171116215791 | 272.36028618845  | 196.034087004464 | 253.237824005249 |
|          | 166.983092667334 | 150.649377863375 | 154.509548705054 | 291.232601825013 |
| GNGPDA1  | 703.315796616275 | 433.194113859912 | 483.313014703768 |                  |
|          | 873.451893437179 | 643.9329225331   | 495.359878931451 | 917.631567606105 |
|          | 505.650842529816 | 700.477686061791 | 866.712228831149 | 853.464809072841 |
|          | 1048.98028527123 |                  |                  |                  |
| GNGPDA2  | 59.8248482438562 | 67.1926218405833 | 56.6458456890715 |                  |
|          | 74.2429851177794 | 71.2787833369055 | 116.122324921267 | 58.0969258817391 |
|          | 50.7364620410977 | 64.9030399249327 | 67.6733764807973 | 78.963270461629  |
|          | 86.0230765383602 |                  |                  |                  |
| GNGPNAT1 | 47.4678477186801 | 49.0697565324841 | 53.1491634301682 |                  |
|          | 39.9697332660833 | 45.6895223823001 | 42.357910063876  | 39.4600924554505 |
|          | 40.1474543172332 | 50.4974478884077 | 40.4136535208406 | 37.1059647239814 |
|          | 42.57175366709   |                  |                  |                  |
| GNGPTAB  | 92.4896666046729 | 165.640362974584 | 167.824386984618 |                  |
|          | 158.478919789334 | 125.197314240529 | 102.559678338485 | 97.1271615802556 |
|          | 81.2228688683149 | 136.190823415283 | 91.5230424957075 | 111.714563124738 |
|          | 93.6717518147993 |                  |                  |                  |

GNPTG 255.241295723095 317.406465928295 805.590413262364 303.139550962377  
312.530335465784 340.553073657744 256.116479208201 203.559653641339  
294.966924715506 419.563859911367 444.738154053278 276.550265506988  
GNRH1 68.2614370871382 52.9603588177082 51.6159542017038 56.4578213622965  
47.8075998240396 48.5835484742456 44.9863726205428 48.6441988290952  
52.2631308081333 85.1188125003595 70.3381994440425 77.1059855034406  
GNRH2 39.9182914210537 52.2832912331043 44.6032218589199 40.2455972565968  
42.2455707947223 41.554942319225 44.1407835440612 45.2806199505029  
44.7058233759912 46.3810615657263 45.0985088502363 49.6629259325705  
GNRHR 37.1485601150873 38.4330755397458 31.5151915411476 40.7481155008596  
42.1650127805175 33.5578650644246 43.5627649099623 33.8558232866797  
35.9645119596869 44.6918600441328 36.2435874904689 41.7575097298927  
GNRHR2 34.9138625012006 38.0226905622357 35.7105247506212  
37.651298468202 45.1137938810047 38.2293008890613 39.0458123429605  
35.0510338774593 40.4220196471124 42.1622837416589 35.4386677371439  
37.6557714476853  
GNS 2101.59244895554 2108.03351084959 2944.3433949897 3361.67247904403  
1204.34388579291 1330.19215036764 1656.16581692717 1521.20630233299  
2160.22713775462 2588.47871581066 2331.12401106076 1950.93175239958  
GOLGA1 90.1056480599534 86.3374157614394 80.8400209263587  
86.0630164348952 89.1012752492647 115.659933682533 104.932630862885  
93.7090094630558 94.9831937714438 117.746495007818 120.418406532204  
80.8366627364071  
GOLGA2 194.225364352044 111.071209057746 96.577572948724  
118.10944558223 110.729504563799 119.474339360208 146.840603547323  
119.738288633084 100.937651342589 134.519244495139 169.144145421022  
125.383837024985  
GOLGA2L1 40.5654775358427 42.0709558258414 35.8265993915844  
41.0726336841311 39.3667161654772 36.4986986135769 42.0605906240248  
37.2237132058632 40.6957787921451 38.6454098044474 30.1388203764747  
45.2783024981315  
GOLGA2LY1 45.9090659324223 40.716553247236 41.6079958749402  
41.7614975630362 43.4544762830742 40.244271403831 34.806104801006  
43.4544762830742 40.7847110517594 38.2069499294002 41.0050831223107  
42.4607795638552  
GOLGA3 997.492549573274 572.81778857651 396.355023788839  
479.318513108472 319.871452890512 510.82619253142 417.086922265732  
362.196116025799 496.791391622565 552.860979481958 514.261598258395  
436.627613548713  
GOLGA4 62.0553450433433 70.1831787109201 60.7530213660442  
75.6103053700122 140.719373122712 98.6108785181637 75.0665411373616  
64.7318794662958 88.6368226476614 72.3297091475814 72.1090339831747  
82.5956705829173  
GOLGA5 403.428042132639 207.489116930705 260.331534765939  
280.034472186873 263.492132556601 256.766675299448 202.494545985006  
149.515611848932 226.882600557693 186.301404367238 164.642060754649  
231.304658157247  
GOLGA6 42.2604978533738 40.2973086894872 42.0164252051496  
42.8768096578102 46.5557478175976 42.357910063876 42.4939802311136  
42.0778399888414 43.5934599686083 42.638061478325 41.8168470823451  
42.1915582886043  
GOLGA6B 44.9896851005259 48.0570064280814 46.9711270147079  
41.3567204694281 51.7495306734657 50.0748292497578 40.5585676679482

43.1567024035183 49.0655215909632 50.4234835272833 46.1673159982664  
58.3285450269055  
GOLGA7 226.168990555083 192.003788858976 171.021755568144  
251.4927207704 170.128899555014 283.111920665176 145.459578481501  
334.639325701194 129.925137664962 169.527304857688 152.972693071526  
199.687268345276  
GOLGA8A 63.200752695983 96.3120603627576 85.5839487225537  
88.5511408870489 143.773311381452 51.0506441018166 89.1012752492647  
62.2982003555312 72.7071934110997 85.6763929745253 123.032006903803  
68.8529879402902  
GOLGA8B 247.007210336963 185.924923239764 151.848243044839  
134.776408077533 361.023743912857 106.951862149262 168.70463124443  
213.204385896543 177.935411895372 237.359267889848 257.761541860837  
216.606583011866  
GOLGA8E 39.2192721306168 41.159706131351 38.7429005059745  
39.066284740632 38.9990801113267 40.3357777530419 39.4600924554505  
41.9721968713295 39.5377896745682 39.9479806809296 38.5239513822269  
41.3844657483749  
GOLGA8F 34.4021554788966 41.554942319225 42.4580504587581  
45.0798408927912 39.1650142708257 41.8613406887824 39.5496902678788  
43.0390857698452 40.9901805728485 40.4136535208406 41.7272875295469  
41.6550823405646  
GOLGA8G 40.2973086894872 41.7656868106485 36.9795961564828  
37.7469621225553 42.8414096678708 39.8724170885333 37.108950999591  
40.4737825400374 41.0381860307445 38.9271399577966 39.6403089864678  
40.1249533205858  
GOLGB1 143.383133346874 127.525206038902 124.664792638889  
159.835690229505 153.660685857642 112.421316052392 129.810477623628  
149.792346524401 107.682738819549 130.812376632261 151.652543512032  
95.8149149211251  
GOLM1 130.985178898633 66.4079972657486 70.4014100046391 59.987045425047  
48.2748123114598 65.7587943905649 87.1735705257803 79.1922819549042  
57.9713749600418 54.2830238965339 55.7868713984479 67.8919712859031  
GOLPH3 472.159979716705 441.247306467645 300.121875447445  
375.697071471585 343.828445728322 424.539111965342 624.51670158046  
484.651969259966 626.390544175817 191.253860976433 311.301613620475  
360.342857415756  
GOLPH3L 105.15507796881 117.305340546242 137.424708183613  
82.7394574977114 106.951862149262 120.508644792138 116.913991315353  
144.898757916905 118.862494537893 168.7696164772 134.40110873422  
162.721587349434  
GOLPH4 53.8856501960117 109.738537924214 51.5292723244077  
104.528976428975 57.0006212637829 101.789162379972 44.2166118829877  
49.2901038327894 48.9931786790166 44.8997235283254 53.2083147523758  
58.7585623394335  
GOLSYN 66.3095900379311 43.9421822132391 38.1421709520616  
45.7397504535169 43.1252272136667 101.383978726419 40.7910160811527  
45.8669209716694 45.4799270968969 52.2256177934134 71.0369238830779  
60.6653636336244  
GOLT1A 184.048982286364 104.072423445726 128.219615202232  
47.6687908290818 199.208033538936 51.3886035574416 264.451310132096  
143.526781144716 199.181938253995 593.801086643125 472.159979716705  
755.852629128252

GOLT1B 73.1931742801095 52.8796369426118 50.2869791217819  
 46.0228732507872 52.5645416722441 49.3172204533818 49.6872467499977  
 56.4779645313958 56.702421372165 56.5379973844443 46.1673159982664  
 47.3172462673426  
 GON4L 74.2151462073098 63.3948709726117 87.455991111513 69.734208465775  
 92.2001835784782 60.5803031036931 71.5249259772583 72.8073366137855  
 71.3527183280827 79.3427669741608 88.0186381834147 66.53831442217  
 GOPC 89.5687388187015 69.8983723094667 74.4508307047509 73.5834042105313  
 66.6118713143653 69.9819944829311 73.0433648756396 67.2714646016644  
 69.2001494999588 91.1057573288203 73.2234405348435 74.2748495231478  
 GORASP1 205.854666205308 286.497342437243 304.33749254654  
 211.685526927495 730.168814097451 283.951419701286 318.768560912915  
 270.78959225422 304.33749254654 414.539381761279 371.280311231075  
 329.677454924062  
 GORASP2 423.804472820231 426.933064567744 343.591727067749  
 344.578407722941 375.095491465679 303.93332785291 284.66531382201  
 276.795797048951 280.159844300266 315.748168057656 286.758099833009  
 369.032450063274  
 GOSR1 59.7863401969736 61.8492980174846 55.8243694410835 48.1662933382789  
 69.9021277921574 53.63657997649 61.0207757595269 46.4672637826582  
 65.3672880026114 54.9527624170441 56.7272804480684 56.2804354745795  
 GOSR2 64.0759817636265 56.4917096880521 63.4249771379563 54.6089451252049  
 71.2787833369055 69.9214859673839 65.6958831220258 66.5539062525344  
 77.0145316377298 48.9826868640753 54.1440452292081 62.7977686460693  
 GOT1 166.910579215196 254.874064929741 234.004293901222 195.221917652149  
 346.844545554188 218.217851814655 374.297474141009 241.706783147271  
 232.77788697408 249.195312452368 256.892326800908 246.242210944848  
 GOT1L1 43.0001432913058 38.9338521051669 38.5045333213784  
 41.3027031037343 39.4693871570028 44.8872784170036 37.1643693306382  
 39.2672712041774 42.9020321355927 45.4614234442527 41.7272875295469  
 42.0424641526302  
 GOT2 714.532923535126 1213.3477481374 2206.44541412808 446.902178094675  
 556.728676214581 451.13133250897 1307.19925493293 949.278493776928  
 1580.58484708669 1372.51401036753 1598.78859278229 1337.53997230271  
 GP1BA 68.3234331335073 67.9697948557876 68.8098607236981 94.5501397951415  
 70.0133734659853 73.8105012820769 95.096268847843 61.7572675712557  
 65.0810479794187 64.6446465846487 68.0414563597154 54.4313108506244  
 GP2 50.8388984085636 43.2649781354792 35.2838283525874 41.1886975241176  
 50.2163892855092 35.314469458379 38.7337086062875 35.2642250366721  
 33.0463640202858 41.1222709786153 37.3687900733549 40.4639532172338  
 GP5 45.0985088502363 40.9731067463382 40.7620472083159 36.5393857306744  
 35.6434124419782 40.8634043028528 37.9430145836712 37.0390589468421  
 41.2870505273664 35.2880714952489 40.3452320167286 39.6352613956998  
 GP6 44.2350046179299 46.4091752823403 51.8122261766744 49.9672547361866  
 42.3685136297603 46.0364000143537 45.3597029614942 44.9631458622215  
 46.0106098064475 46.2286164776607 47.1970991228159 43.1805016690297  
 GP9 35.6111578834671 41.554942319225 36.3604951341921 36.3604951341921  
 35.0181575202066 38.5252456306656 40.2154497375715 34.1806289878747  
 36.9060997041453 32.7876527533679 39.7342718293432 35.9604262434141  
 GPA33 43.7585538437696 45.3486182278177 46.1653991089885 49.1786207920603  
 40.8873907150245 48.6621527194963 50.6774883370457 48.1591264215184  
 46.7760357462635 38.3092241935352 41.6336636285875 42.7782216342806

GPAA1 423.254211470935 583.915973546284 383.371300272181 174.559216176175  
363.215063520042 233.00902546331 331.390452289344 237.401487995882  
449.059703234741 260.766438659762 418.810270137243 228.984484917083  
GPAM 60.7371790125714 62.843734579668 62.2200723764909 60.8581462216607  
86.2118355769367 104.361353204648 70.9567983915276 93.5769827229864  
59.6922302604696 89.9615463738575 84.4821163646146 82.7394574977114  
GPATC4 44.6231541342 47.2055133646385 48.2883694323339  
46.7577982595088 47.8075998240396 49.1013967533186 41.8315602975157  
48.6441988290952 42.1594905198929 46.6598879466655 46.1673159982664  
48.8670821164567  
GPATCH1 110.214922820817 87.036020750455 100.305262467668  
91.5202521578181 101.987604729928 102.020047144427 159.359051158123  
113.444217634165 120.771048750176 111.056599389048 130.64028226556  
100.677422836631  
GPATCH2 70.7238101239421 169.970634268117 129.747577660612  
85.1847490113446 111.033548392096 75.4227827818591 104.341160312305  
129.309742451628 82.8150137756969 111.511934617893 99.9752275166514  
85.7732262204681  
GPATCH3 64.546412747238 63.7721358300879 72.2016884438365  
70.8835636550472 95.2833228196616 74.3729155936862 77.9028721785469  
96.5813769696577 90.4957279507369 89.1516394894484 95.4841914842335  
63.1443731864055  
GPATCH4 107.176733647834 88.8772406115484 94.3329263062576  
78.9479233685889 218.819478568299 148.964204638494 104.541813290553  
90.8109585999257 95.6215575902122 82.3488166506716 81.8242150474253  
123.608921653229  
GPATCH8 48.0201377454632 44.2105195734073 42.157627240486  
53.3967242431461 50.2163892855092 40.9506062495231 43.0930293831497  
47.4740726032707 46.4164127487052 57.165971310746 44.2925355984056  
42.8864415494484  
GPBAR1 46.8712941728147 54.5374188496807 52.9736397524094  
62.7108230507424 57.0006212637829 118.410983614453 41.5464765641928  
48.3871747110233 45.2392954271967 78.0020909283414 74.8473087205709  
79.5898953726467  
GPBP1 165.349426587915 154.811704749343 174.058845828966 217.127708207497  
132.341766267192 202.795613942391 130.379966531543 132.997204273031  
200.698372627272 105.414552529943 116.018801676087 165.797721197832  
GPBP1L1 118.762101740563 80.882176929636 86.754538970161  
77.2906963563431 104.141384807311 87.0045333192221 81.454335582503  
98.2074490157865 106.165518810891 86.7076796107636 95.2490714726663  
91.1741538903522  
GPC1 93.1759373099875 143.822560762049 140.276520383146 58.3475983630509  
79.9161139112432 52.4351670989268 66.9239565096247 103.071727621257  
156.088284999883 117.634238804678 95.0604882262201 80.8366627364071  
GPC2 59.7179445506128 47.8400694856726 41.9666541498638 44.4367387274922  
71.1607965028029 33.7818132446042 51.4349390827895 59.0262390168156  
50.7619345314571 46.1390887492649 43.4709415392696 44.5432192783161  
GPC3 70.3757673501097 254.874064929741 152.200107222761 53.3967242431461  
52.3242437351389 92.681224908389 46.3057385979341 43.2551508830106  
50.2223403889892 85.3431175579775 74.1425714439424 67.1675878355908  
GPC4 127.232160404726 78.5174639327946 49.9256753636167 79.1000897258245  
145.572606290643 143.679866958604 74.1353964055485 132.730723037077  
126.682296930289 126.670728021682 105.953705702398 197.232697438521



|         |                  |                  |                  |                  |
|---------|------------------|------------------|------------------|------------------|
| GPC5    | 43.844855336215  | 40.2493681589104 | 43.1931731665131 | 45.7397504535169 |
|         | 43.2484996523549 | 57.8005007012205 | 38.8417151851134 | 45.1714698794331 |
|         | 43.9450023643394 | 48.8623729374733 | 45.6348103033479 | 41.4508241771315 |
| GPC6    | 106.521012342668 | 56.2851430356168 | 62.0967404944031 | 99.8063480813138 |
|         | 82.6157566292355 | 96.034706957068  | 88.9430141071732 | 85.8277891453447 |
|         | 66.8632294055679 | 77.676210875358  | 75.8056934060866 | 68.5174271063894 |
| GPD1    | 36.1232327599945 | 39.1982470626863 | 41.1367478979484 | 43.1847628331565 |
|         | 39.7568367479301 | 43.7630587657205 | 44.8643898647322 | 38.6454098044474 |
|         | 41.3803269429468 | 46.0119912782855 | 34.5633623842083 | 38.8495095797881 |
| GPD1L   | 212.945601743319 | 803.548811322583 | 641.462632112151 | 176.816741656659 |
|         | 1245.45371155527 | 804.592753722875 | 267.70610731202  | 1327.93833415582 |
|         | 635.288331955846 | 1506.33570635551 | 1173.47285626656 | 540.037371261388 |
| GPD2    | 44.8914371498528 | 51.7495306734657 | 43.7085219318425 | 49.9672547361866 |
|         | 43.004943518025  | 43.7078399718247 | 49.540449125788  | 49.5544686779125 |
|         | 48.4497719907777 | 42.5193208629123 | 41.1638563416981 | 49.0986627051784 |
| GPFR    | 50.7903824729818 | 58.4262160879174 | 79.9391673512018 | 68.4906691348625 |
|         | 55.1563703466328 | 80.7067505750848 | 42.8684958525042 | 44.571915452417  |
|         | 53.9287524861617 | 98.2843999216669 | 72.9648672559089 | 51.138877923954  |
| GPHA2   | 32.821392987958  | 42.9358255168086 | 34.1806289878747 | 40.646702696033  |
|         | 36.2048942610546 | 40.9506062495231 | 30.4430902995779 | 31.3302670771182 |
|         | 36.8127605061228 | 35.0082729554459 | 35.6970528713709 | 43.7672102682067 |
| GPHB5   | 41.6354649482853 | 44.7829632472754 | 48.4890615340603 | 45.334106390212  |
|         | 40.9950639693255 | 45.3882138838137 | 43.4544762830742 | 41.1575777497576 |
|         | 47.9035532886869 | 53.0357938671646 | 46.5650556481721 | 46.1592873342534 |
| GPHN    | 51.2851682978581 | 56.3560498705517 | 73.7133884699889 | 75.4466520363487 |
|         | 66.2702569771609 | 64.0354923953233 | 57.4622430729629 | 47.8947595316832 |
|         | 73.5834042105313 | 69.0530953932111 | 68.6199296680241 | 62.5036823572932 |
| GPI     | 766.647626178442 | 528.840700144811 | 640.0926391761   | 588.247843264181 |
|         | 971.856840043688 | 545.827286197333 | 1182.10714525377 | 588.972273484465 |
|         | 2903.00880209344 | 529.430648638878 | 531.869698775629 | 490.301992866742 |
| GPIHBP1 | 40.8163035350222 | 44.311722896416  | 45.6989664108554 |                  |
|         | 42.9358255168086 | 43.0860383229288 | 59.5711567415697 | 41.2040352443154 |
|         | 44.4489662507893 | 43.0496526069072 | 49.9493230064613 | 47.2569851908386 |
|         | 39.9519547348106 |                  |                  |                  |
| GPKOW   | 62.4317959077388 | 56.463481075522  | 62.3245608177257 | 57.0629653735694 |
|         | 62.8270556619309 | 57.1752846228778 | 83.0647477737971 | 77.2048580540589 |
|         | 85.8154958329408 | 80.2774079897733 | 77.5698542248061 | 58.6481644777552 |
| GPLD1   | 39.266565827316  | 38.5921548841176 | 37.5597671487621 | 36.264823544143  |
|         | 52.6226745117396 | 42.2830035667142 | 42.629412460409  | 46.0633179231318 |
|         | 43.6039443285137 | 38.6454098044474 | 43.9802831041664 | 38.8964578286293 |
| GPM6A   | 40.9558083259517 | 42.4649374149262 | 41.7364024833895 | 50.378948785456  |
|         | 44.6253529423632 | 45.6663865711866 | 42.0605906240248 | 43.9755735391884 |
|         | 46.5549623118323 | 43.9450023643394 | 44.7765484590865 | 44.7915315085948 |
| GPM6B   | 53.5698357689852 | 43.5873188565519 | 45.0129098817151 | 55.7764940944098 |
|         | 42.2510526338368 | 93.2870243833082 | 50.2471139112912 | 45.2806199505029 |
|         | 40.7493885015617 | 50.2750065554387 | 54.5374188496807 | 47.7390230243778 |
| GPN1    | 560.954913956997 | 357.800871454252 | 309.39599482851  | 348.165210494253 |
|         | 483.416873464931 | 240.887877769007 | 554.163106145921 | 846.773659307087 |
|         | 332.830805115112 | 266.439343650315 | 252.134800295199 | 301.594300620246 |
| GPN2    | 286.398178392901 | 244.435346243998 | 290.316757790733 | 187.601223003233 |
|         | 337.013669560645 | 148.770228614661 | 385.918487165555 | 416.559486912165 |
|         | 340.429325650126 | 374.096934824025 | 279.841798764418 | 254.373837233228 |

GPNMB 1037.51323185348 171.992427227088 148.158262886253 2196.59044510709  
186.697432898147 1257.19844370057 352.768184657577 362.506098778318  
605.970682363975 583.421166842011 322.109212713082 409.724772942357  
GPR1 358.30596676183 141.180682718758 184.750252804038 279.782392390288  
127.2070318269 147.151416108234 235.826763901522 488.463605278409  
160.950554451488 377.491895827114 373.802562320876 298.771150048863  
GPR101 41.6354649482853 40.9731067463382 38.5045333213784  
41.0726336841311 43.9450023643394 33.895835691032 40.5585676679482  
45.7476095696859 38.7298222155532 43.844855336215 41.2598458726002  
43.2776458914333  
GPR103 45.6517320730042 47.6914221838216 47.9035532886869  
44.6905691366696 38.0598374201407 42.2577689927563 43.8206425661746  
42.357910063876 42.357910063876 42.4594149893798 41.1638563416981  
44.6484005362281  
GPR107 44.8914371498528 46.6314009405034 40.8420925848403  
44.6905691366696 46.3150221024046 45.1873487463472 57.6643188499117  
45.4757965005055 45.1899271235974 40.4136535208406 43.1931731665131  
43.5738557773903  
GPR108 114.535461066963 89.0898346470643 134.896696950857  
174.252441615373 144.799432299339 129.091447141381 96.2959923858457  
123.800965644574 128.024853362102 153.595112580363 160.264217082275  
162.23769718358  
GPR109A 52.6960621424156 60.1685144469519 63.5107036952143  
700.010354583503 45.4751076037511 43.2805590023412 126.826715174564  
37.2237132058632 65.9254098858352 45.2556760873335 44.9713479185144  
58.5087296620514  
GPR109B 50.0697497247754 52.2381815246326 56.2000979702695  
389.131545459708 50.5868854091439 46.263826584899 102.499011190932  
48.8467058855408 56.1733549054832 50.8826620053386 49.8872574072587  
52.7972156492746  
GPR110 96.5615807039306 77.9992448636936 64.6835308827804  
39.5522630869979 104.220256076979 45.030514396298 108.806649898122  
48.8524897151151 104.313754953569 63.3872214856708 63.7963501146829  
114.073853703538  
GPR111 39.7576136507593 44.7829632472754 44.4311655729487  
36.3604951341921 40.5710637884029 38.5252456306656 39.2533668167483  
39.3709357615493 40.4997186069494 42.8936990772838 39.9070785037411  
31.8554734753953  
GPR112 50.1533437545239 45.6533175604486 40.5734458834617  
41.1886975241176 42.0709558258414 53.3185097662527 37.0564573649223  
37.7612949798895 41.1742244762318 48.0211752672327 49.4593570700221  
42.4607795638552  
GPR113 41.8409927585705 45.3486182278177 47.5673419710251  
43.4410741327254 47.0954207417646 42.8598805316863 49.6872467499977  
45.642304356051 52.2631308081333 47.4767851750188 48.6767028205398  
47.6938628797168  
GPR114 43.3638918705225 74.621822948059 64.1080166181228  
148.0593851111127 52.8190882379316 47.7556758818053 45.7452456977857  
51.7538628098347 46.0106098064475 47.7180816682562 51.1483696410762  
42.7782216342806  
GPR115 61.6544855697851 80.8285585008048 66.9239565096247  
40.1804147506786 55.9283039581662 38.7340969861754 71.5249259772583  
38.079222289614 79.3861418060845 60.2877434874622 69.1129431075514  
60.0940570991178

GPR116 226.785831708938 265.570814613305 428.729935028911  
285.187681119318 183.311305255895 218.217851814655 89.1012752492647  
196.247893540766 83.0534943004588 128.230543301378 209.61080762285  
128.981582396627

GPR119 51.7607563002005 50.6229884142872 53.3127618245672  
65.3191216270241 41.5668884168669 49.8472708021525 50.2016912396771  
50.5070012045444 58.9056300364078 49.1928206164702 52.104880481326  
52.3896785600751

GPR12 40.8681871019812 35.9305494063137 39.9101908547397 46.614092935749  
38.0598374201407 42.5660695551615 43.5627649099623 40.3357777530419  
39.0775870687758 35.0082729554459 38.956280281655 44.4475838947656

GPR120 55.5276281380084 43.0971787292711 36.4564050256915  
36.890925044696 47.0954207417646 38.6414316877471 35.8227939208521  
40.4359177791566 35.6139301508335 46.6598879466655 34.7308008643142  
38.4330755397458

GPR123 41.0608773166058 36.89524015739 41.6977706798234  
38.2041059863839 51.940083408061 32.9046688061235 43.1931731665131  
40.5158867964016 37.10170285405 47.2299678280724 39.7342718293432  
36.064718696392

GPR124 103.356071080819 82.8205269728224 65.6620676514157  
107.111886993156 72.5027069303875 185.703644892356 45.3597029614942  
66.211494935811 44.5303781239209 161.180847265279 154.19962858342  
109.241121384212

GPR125 64.1882546112044 46.9498651027418 48.3609527732104  
44.6131679221578 56.1838945110653 48.260931742163 61.9432904657734  
64.0766831552464 52.1379596312084 123.261654256925 71.2708400614309  
82.1062834830477

GPR126 68.8698243753339 146.432425205891 89.2285288333749  
37.0732977341185 60.5290966885203 53.8461734834857 83.8811735017279  
145.526972410673 99.2341244350412 121.45753287862 146.691463448295  
142.585892496231

GPR128 45.0985088502363 45.8284004440739 42.4890076400051  
40.0698728584484 36.7837318601824 40.7616966228404 52.8496345990125  
41.9820792173615 42.1594905198929 45.6355219961567 41.7272875295469  
37.9607839934735

GPR132 53.593974682612 58.9128486419884 61.0370242377391  
296.532363090593 46.0977687311222 51.9421032049606 66.6894494536346  
50.5070012045444 38.9834959368496 42.4594149893798 46.0905079010237  
41.7575097298927

GPR133 38.1169703906207 37.8217989841918 37.3687900733549  
34.5425384901279 46.6397391251762 40.040778349137 37.3799542961839  
40.1474543172332 39.3750969348308 34.9138625012006 37.9946685306274  
35.5523662009011

GPR135 39.7576136507593 37.3634897565502 43.1660110696573  
40.9607305725196 36.0439235933921 40.5281496800812 40.3302268293707  
39.3709357615493 43.4656637536244 39.7835513496873 36.4689948499058  
42.357910063876

GPR137 393.464673405634 509.463928291526 768.354209323884  
336.679355848349 776.670493028756 297.187417426993 605.338871441599  
574.847203528544 549.407911286514 540.037371261388 445.421601813221  
332.659496278775

GPR137B 193.981651711507 162.287617963536 259.906934432819  
318.069132873489 158.718808397001 143.391384762612 141.924244643825

163.742560819575 140.288771064502 152.054785478928 128.766242896259  
225.120999402048  
GPR137C 47.2862299990938 46.6996902348633 46.8267540220952  
45.334106390212 42.9090346219023 47.2927436772465 49.8281348927244  
46.695848687694 49.641159251878 51.5855515705917 45.1432412071268  
38.8495095797881  
GPR139 38.385865183581 38.8336427948187 35.5220586859301  
38.6414316877471 40.6723334103791 48.1591264215184 37.9430145836712  
44.9977782988116 33.8558232866797 35.93950183586 39.153226699662  
40.8681871019812  
GPR141 43.781101409552 44.1533327883807 43.0971787292711  
76.7137782332689 44.3557408297309 41.6590564937735 47.3661873039785  
43.7731874801003 43.3262148375525 46.441301934328 41.0808257270221  
44.1452943804044  
GPR142 44.9896851005259 44.0409178714232 37.0642268327439  
40.5484717678957 42.7107928951766 44.9896851005259 40.1235656101329  
36.1375121409002 37.3600014814388 39.6719190054379 41.1638563416981  
44.3521099857368  
GPR143 34.2180669723984 44.6918600441328 37.4642807402741  
47.6687908290818 52.8190882379316 40.7616966228404 40.5585676679482  
44.8997235283254 36.197424053556 35.93950183586 42.4580504587581  
45.7562276914441  
GPR144 44.2350046179299 40.4359177791566 38.8775560911841  
43.4410741327254 38.5512429290626 43.4681646416585 39.1539892144371  
45.0972184964705 46.4164127487052 41.8613406887824 43.4709415392696  
40.1700117452801  
GPR146 50.7390160399184 47.5647821785529 44.3344900481112  
45.0798408927912 39.6535880152834 59.5979861826984 44.4639405506967  
46.4672637826582 54.1745577382276 47.2299678280724 50.1649089793069  
45.1735152121056  
GPR148 38.2083710281545 39.1982470626863 39.0775870687758  
42.0102671859606 39.4693871570028 39.2985791324641 37.7136011474903  
44.6107027295193 41.074824727477 37.6383530120621 37.1059647239814  
42.2577689927563  
GPR149 40.6559419616644 42.9887069977696 42.640829914102  
41.4636047919453 43.9450023643394 38.385865183581 42.1157692936428  
41.1575777497576 44.7058233759912 39.2623423164488 42.0750889188255  
38.3834435509221  
GPR15 45.3872406432794 49.3581578587582 40.4882741869718 42.5664883002833  
41.6806984441849 43.6670755115848 45.4799270968969 41.4508241771315  
42.1594905198929 44.1379638573455 44.1148826235374 42.4607795638552  
GPR150 42.2455707947223 38.3322849790657 40.301483914446  
43.5627649099623 40.5710637884029 45.3882138838137 36.9355798143571  
41.7419877611072 45.4799270968969 35.6208308220005 43.844855336215  
40.1700117452801  
GPR151 37.4554876386402 40.5400384479766 38.1421709520616  
35.0448343468967 37.5556299264699 34.9849896310235 38.7337086062875  
35.6825474397235 35.4332080966594 36.3612409063792 37.7384958256497  
34.4570158133896  
GPR152 41.3387790895716 39.1982470626863 42.4580504587581  
45.0798408927912 39.9697332660833 39.0266821712099 38.7337086062875  
39.853866204927 43.8482802038826 43.6033221838149 38.079222289614  
37.6557714476853

GPR153 43.5710871617107 47.6229101519945 46.4569566520107  
40.1804147506786 52.3242437351389 45.6129956328415 49.6872467499977  
44.8997235283254 45.1899271235974 45.7911932481722 49.1868644496737  
45.3763275588341

GPR155 39.9182914210537 42.4493032770053 37.2291018661279  
41.7614975630362 43.844855336215 37.9951997351435 40.9157352260901  
41.3012916486748 39.853866204927 36.9848592422398 40.7725311293918  
42.1860813954352

GPR156 39.3709357615493 42.1607322031054 39.8299340037009  
39.2780515621926 40.9950639693255 35.7034203372528 38.8417151851134  
37.33030683349 40.8970401536578 39.4710743516517 38.4689132737495  
48.8670821164567

GPR157 39.4710743516517 42.7775752471711 41.437237454134  
37.1894304543751 41.5668884168669 33.2552842693684 38.941855825269  
37.4484310268909 33.4698406117406 35.4990901121893 36.43924066428  
44.4475838947656

GPR158 40.3478825593224 40.0527893189096 39.991353369336  
40.8681871019812 37.2567512265363 37.3799542961839 44.6032218589199  
35.2642250366721 36.4476883897928 35.8304004211528 35.4386677371439  
47.6040671292013

GPR158L1 45.9090659324223 42.4493032770053 44.8872784170036  
39.6292788039793 42.7982502551634 40.244271403831 47.8947595316832  
40.7311497914871 38.1169703906207 43.2988017098387 40.547835538778  
39.1553169409075

GPR160 71.2963721541702 98.9988668602468 62.3245608177257  
112.23915619297 49.5666074434383 48.0350549043063 201.027801320306  
172.676819138152 139.04252811433 67.9259304928255 75.9802606133139  
114.719721626067

GPR161 40.2543341073001 41.9894412416874 41.924725226806  
43.1275490164761 40.5303289242683 46.3203995372658 51.2417443769676  
46.7508829977587 40.9460396298042 39.3999056968598 42.357910063876  
48.4849194706125

GPR162 59.8838591118356 53.9568457310634 53.9612654850046  
88.6287852712744 71.4864243594056 68.9562915755919 50.3519150282938  
55.7405934254857 49.1940901905636 65.3672880026114 68.0414563597154  
52.6151169127166

GPR17 37.3463875295726 39.3999056968598 41.2365089689635 43.8002456102021  
43.5544347011646 39.7394181011603 47.8947595316832 36.9355798143571  
43.6670755115848 40.8049408996274 44.1148826235374 41.3481355128089

GPR171 40.2543341073001 44.1239711172417 41.785676764591  
35.314469458379 40.2449343247539 38.5252456306656 40.4359177791566  
42.0494116081998 44.619512785899 39.5637454855233 42.911855821602  
40.4639532172338

GPR172A 746.252816568691 876.959744461441 526.44841348248  
380.188301866313 713.685405035516 231.472806936915 511.067537752967  
360.342857415756 602.047768767953 232.815747390118 259.812381486915  
213.520663841371

GPR172B 45.0985088502363 53.0383634135393 66.5285423077808  
48.856176220627 53.8260140375214 50.4022543872993 55.4004611309636  
41.4508241771315 75.6382797289563 105.962195935529 102.993620677265  
61.5300817099814

GPR173 39.4710743516517 44.3874750238889 45.3974838013476  
43.9577120438279 43.844855336215 47.2009420656854 40.4359177791566

38.8964578286293 41.6285300488826 41.3752447964111 39.9899430628542  
41.0183489151839  
GPR174 39.4710743516517 41.4508241771315 41.1367478979484  
41.7144525110048 39.7210115145672 38.861780967827 40.4359177791566  
39.6474008369935 38.2874316439311 40.6559419616644 38.7337086062875  
39.7844133452634  
GPR175 103.945335792682 96.3918711895208 97.1271615802556  
151.225738885272 154.111066539468 106.78552222475 167.872060678879  
123.597489107285 123.674164545425 128.873145026756 131.68956899407  
105.589475270494  
GPR176 49.085741080241 41.8848959280916 48.6037684272115  
47.481302504066 45.6895223823001 43.6670755115848 41.706879587091  
50.5070012045444 50.9010149857308 42.3606390470387 44.3763859390287  
44.1452943804044  
GPR177 110.146992754585 75.3761360028971 212.813224717262  
118.428477744376 191.668846959973 307.264133974364 184.087380444203  
179.974187861013 97.3443444704601 242.503720442197 291.232601825013  
303.458085392002  
GPR179 42.5193208629123 40.2493681589104 39.2707964550441  
44.1483976313959 43.5544347011646 36.6271061451613 42.629412460409  
46.7980335276155 42.5406888281114 47.2299678280724 47.4630625313159  
47.3992733452821  
GPR18 36.6480005877129 43.8495248991589 38.2280071951674 65.524821699432  
42.6022652963326 38.2293008890613 40.7910160811527 41.1575777497576  
39.9444191873552 43.844855336215 43.6629145624937 40.1700117452801  
GPR180 94.8260360398356 86.1924491308234 91.2769094348604  
97.0813208326187 72.828269171954 70.6691645786819 73.4820932957859  
71.0593419018503 75.4572860692649 69.2963913574682 57.9864701726379  
90.9361642101537  
GPR182 38.0089018744739 40.2493681589104 39.1799070031819  
38.9534635879195 36.08956004634 44.8872784170036 36.5352572191451  
41.3506832276112 39.1790517315259 38.1042454705119 38.2795150354677  
35.2448979801094  
GPR19 44.6717213146407 45.7979032939211 48.0654860391912 51.4802440299586  
46.7058093820839 42.4580504587581 53.0932869234775 47.8947595316832  
44.5678064264717 44.1379638573455 41.3553369544097 44.4475838947656  
GPR20 35.4287975493553 41.7337506166619 36.8730514568925 41.3027031037343  
46.1804647841331 44.8872784170036 40.3302268293707 39.2672712041774  
40.9901805728485 40.1179210534118 38.1835938174625 40.3691324547049  
GPR21 49.540449125788 40.4359177791566 44.8872784170036 48.4916117779992  
44.6834648302383 47.2927436772465 39.8695929627783 42.357910063876  
37.9273653326866 45.1569741609597 45.310660704531 43.1805016690297  
GPR22 39.8662795144616 41.4508241771315 46.0727230219512 41.8778873678551  
38.8456942580061 43.6670755115848 43.6753843488695 44.797320243931  
40.3316153483289 42.6793753550854 44.1148826235374 45.4799270968969  
GPR25 32.4552405279874 39.0894172982439 37.5597671487621 35.1451084093692  
38.5512429290626 44.7804080899431 37.1643693306382 33.2467975244196  
35.9645119596869 42.3606390470387 41.8168470823451 30.9241129241985  
GPR26 38.2083710281545 39.2907645923217 38.2280071951674 38.0958223740111  
41.0885562160946 39.9397419279057 34.806104801006 41.2551966132486  
38.3418933808844 39.8873706855774 37.9230440150891 41.2437378488025  
GPR27 77.3752541676627 75.3462586192013 92.4350913779886 84.2804410361247  
97.5394336319916 73.8105012820769 85.5027511448958 87.9468208580228  
93.0888239577809 95.4072431786073 82.7309298534989 81.1189042503645

|         |                  |                  |                  |                  |
|---------|------------------|------------------|------------------|------------------|
| GPR3    | 50.5670783769975 | 45.4143854024453 | 41.2365089689635 | 44.0451487108213 |
|         | 56.8307116636372 | 57.4777075615651 | 45.7452456977857 | 59.220967994972  |
|         | 44.619512785899  | 38.8507804383261 | 45.0589947942306 | 46.3411353377615 |
| GPR31   | 42.0532901689036 | 39.6995529770239 | 44.0451487108213 | 42.1273928203021 |
|         | 43.7517118200398 | 45.8325181856483 | 36.634024014558  | 38.4540849632254 |
|         | 39.3750969348308 | 40.8970401536578 | 36.2435874904689 | 35.7451401627836 |
| GPR32   | 38.1169703906207 | 31.498275130159  | 37.9482157381008 | 41.1886975241176 |
|         | 39.7568367479301 | 43.7630587657205 | 42.8684958525042 | 37.86982638952   |
|         | 44.2607789091176 | 41.7405682794166 | 40.0766543123257 | 42.0424641526302 |
| GPR34   | 45.0985088502363 | 46.9919960628953 | 46.4053780043903 | 50.9339938653926 |
|         | 40.5207392413115 | 63.805429165532  | 43.1931731665131 | 43.2939209072046 |
|         | 38.6558726824244 | 40.4544974307172 | 39.0550139257658 | 46.917149434588  |
| GPR35   | 52.9240098541574 | 57.7757446006652 | 36.5474283500601 | 50.8567345921473 |
|         | 38.745552403895  | 43.9724628401189 | 35.8227939208521 | 44.293922970134  |
|         | 43.0930293831497 | 42.5664883002833 | 44.9713479185144 | 41.1554481567603 |
| GPR37   | 58.5759178381027 | 42.6022652963326 | 40.5734458834617 | 54.1240583139871 |
|         | 44.3557408297309 | 73.5743059777365 | 47.4439407315335 | 44.2159020605784 |
|         | 66.3209349903185 | 49.0841460667818 | 59.0537479001842 | 43.6753843488695 |
| GPR37L1 | 42.0532901689036 | 37.4540772310118 | 38.6727842796202 |                  |
|         | 35.9521941716188 | 36.2048942610546 | 39.3841861812262 | 40.9157352260901 |
|         | 42.2577689927563 | 45.6582729799009 | 42.3606390470387 | 37.8372168909583 |
|         | 36.6603338274678 |                  |                  |                  |
| GPR39   | 37.1485601150873 | 42.0709558258414 | 41.3366779545815 | 44.6905691366696 |
|         | 44.0451487108213 | 37.5887129572848 | 42.8684958525042 | 42.6450179841129 |
|         | 41.5635499110307 | 41.9666541498638 | 43.4709415392696 | 40.2669497398702 |
| GPR4    | 76.7820250461545 | 121.84142967836  | 120.289145237975 | 78.5141640924736 |
|         | 69.493532577364  | 78.0586153423713 | 43.8206425661746 | 81.1284422173774 |
|         | 50.2223403889892 | 49.4006068471301 | 57.8991270166934 | 51.2318935933116 |
| GPR42   | 39.3709357615493 | 44.8529259387308 | 36.3604951341921 | 139.925369282704 |
|         | 42.3685136297603 | 58.0095518210499 | 46.1634822993009 | 51.555506218204  |
|         | 40.137818555383  | 36.9102644736882 | 43.3085358214154 | 37.3600014814388 |
| GPR44   | 38.6454098044474 | 40.2493681589104 | 37.6557714476853 | 43.9282059368202 |
|         | 41.2740822675592 | 39.4953494583071 | 39.2533668167483 | 40.6171774724171 |
|         | 36.9060997041453 | 45.2556760873335 | 40.4504608195666 | 42.7782216342806 |
| GPR45   | 39.6609238036815 | 34.0382693188794 | 41.6079958749402 | 44.1483976313959 |
|         | 41.1868052124344 | 46.574682061365  | 36.8369172900902 | 38.745552403895  |
|         | 39.1790517315259 | 40.8970401536578 | 34.9428206949566 | 36.449101775775  |
| GPR50   | 38.8561375693335 | 36.2103905554984 | 37.0642268327439 | 39.6292788039793 |
|         | 42.9090346219023 | 39.3841861812262 | 46.3057385979341 | 38.8495095797881 |
|         | 36.6312676076142 | 40.4136535208406 | 40.3452320167286 | 36.1647506311964 |
| GPR52   | 39.5676051939342 | 37.7384958256497 | 35.8265993915844 | 40.9607305725196 |
|         | 40.5235471987417 | 42.5660695551615 | 38.4456289125816 | 38.2182800228728 |
|         | 41.8197029429821 | 35.1266109638107 | 38.8132170743603 | 39.3789825717286 |
| GPR55   | 43.3638918705225 | 49.83247261979   | 39.5450079747895 | 38.9534635879195 |
|         | 43.844855336215  | 38.8336427948187 | 41.3594868055879 | 41.2551966132486 |
|         | 38.1169703906207 | 44.6918600441328 | 43.0016969050339 | 40.8681871019812 |
| GPR56   | 1075.04105984319 | 1291.71781703042 | 2237.08790397818 | 226.288835947947 |
|         | 350.796638646601 | 219.64979849407  | 720.552354470517 | 628.403814060213 |
|         | 1335.4111951034  | 1228.1735887278  | 1111.13061382818 | 789.511653564341 |
| GPR6    | 40.4639532172338 | 45.4882438975269 | 42.0621425894624 | 37.7469621225553 |
|         | 39.5595233162192 | 46.6872654833579 | 45.1017494688414 | 42.0494116081998 |
|         | 41.3803269429468 | 44.8997235283254 | 35.046946054314  | 38.9496515344837 |

GPR61 35.3227485563945 38.9338521051669 37.4642807402741 40.1804147506786  
46.7508829977587 33.3470732872681 40.0052661202207 40.4359177791566  
42.0621425894624 39.1621898366355 42.6366765186182 34.9138625012006  
GPR62 43.4626049853157 36.0366673493555 40.6737160001291 35.314469458379  
37.6527901109005 41.8613406887824 39.0458123429605 39.7509165247419  
35.6139301508335 40.4136535208406 35.860430241131 39.1553169409075  
GPR63 42.442231667357 44.6918600441328 40.931294690669 46.4555908533915  
45.5809132232681 48.0350549043063 46.3057385979341 44.0390019242862  
43.0930293831497 45.3530683538086 38.3684202018524 45.8546719310325  
GPR64 44.5282181324797 43.3458769998118 44.5134109184888 48.3772965749984  
36.3390947880186 44.8872784170036 41.253645578517 44.4031868028216  
43.0930293831497 48.5374448344297 45.447310733898 41.1554481567603  
GPR65 47.5647821785529 49.3103031996204 45.2640606138546 305.959643033169  
45.5198200633333 69.8832723783498 54.0170817319522 45.223075311113  
44.8997235283254 39.6251842352088 44.7926323492519 44.8872784170036  
GPR68 147.719172115976 59.6359245937831 52.5353664902258 136.392873701653  
54.1225249245036 56.7429967489965 43.6753843488695 67.6767845246581  
43.4656637536244 63.3872214856708 55.5567699051046 46.8129509799753  
GPR75 39.9697332660833 43.0227387991135 39.0775870687758 42.6913548400127  
40.4639532172338 37.2686490268265 42.9803717121865 44.797320243931  
40.8970401536578 39.7835513496873 49.1067959632109 36.1647506311964  
GPR77 37.8386378737561 36.89524015739 36.178547300352 37.7469621225553  
37.956732373465 35.314469458379 38.6243997507646 34.3865306339645  
35.9645119596869 37.4302011516587 33.4071187618571 33.8196020406676  
GPR78 46.0920218698606 44.6918600441328 49.5424425850549 42.4580504587581  
41.6806984441849 45.4882438975269 47.2927436772465 46.2779564481158  
46.2027193115397 46.8954576545929 39.0550139257658 41.6550823405646  
GPR81 59.8248482438562 107.005820817545 70.7760293129408 49.5424425850549  
100.386011517899 45.8325181856483 122.924027019519 48.87875862356  
115.954295099681 124.017319373302 135.308001652191 92.6545309624315  
GPR82 43.6706764143908 42.2114134935898 44.4652605017595 45.0017158586743  
42.7982502551634 42.0847226073592 41.253645578517 38.9074189954657  
42.38204124321 39.528971131769 41.9083581529276 39.9519547348106  
GPR83 39.7320564340365 40.3384318592985 42.2577689927563 42.6913548400127  
36.8442943492616 40.8970401536578 37.9430145836712 43.3262148375525  
39.8873706855774 34.8137085420423 40.4995052849302 40.716553247236  
GPR84 74.7955767483841 45.4143854024453 56.410923639913 363.108973029004  
45.1137938810047 45.1873487463472 127.724641303 43.1567024035183  
41.9635525160083 44.0409178714232 42.5426057453993 38.745552403895  
GPR85 36.9060997041453 36.5219488315447 40.6737160001291 36.6501141438378  
42.1650127805175 42.2577689927563 38.2933870238743 40.5158867964016  
40.5912213523345 43.2988017098387 45.310660704531 38.1421709520616  
GPR87 53.3967242431461 44.9370339275041 40.7620472083159 40.7481155008596  
43.7517118200398 41.8613406887824 45.8980298854198 41.6466169548846  
57.4777075615651 53.0357938671646 49.0361180089431 58.4200819624972  
GPR88 40.9558083259517 35.6434124419782 36.5474283500601 45.0798408927912  
40.6723334103791 42.5660695551615 38.7337086062875 40.6171774724171  
40.6957787921451 41.3321861371202 40.2649309204478 39.7411455670172  
GPR89A 62.7669079605627 69.5544840164738 99.6821042055758  
58.9168466928565 126.897002134472 66.1082848714279 85.2088054619229  
63.3768687067745 86.5616422570166 45.5776159432079 42.2618615571566  
65.2125527940945  
GPR89B 83.0534943004588 83.0574731969818 140.629562742418  
63.1604223919703 144.799432299339 84.3755392205436 87.455991111513



92.4953883194488 105.247736284747 50.7855742231932 57.4622430729629  
88.9641595603127  
GPR89C 59.3923286524971 70.7702047405718 84.1401040507557  
57.2856683017619 105.492189976437 66.9499465764301 69.2322821603564  
57.8765910878975 82.4005336009159 41.2598458726002 49.0795382664902  
68.6627996695828  
GPR97 40.2543341073001 41.5191828467556 41.4528134188983 126.14245679817  
41.8441156763056 47.8636003588181 57.0325515903232 42.6022652963326  
42.1218529375265 40.8607340038818 41.8645741488184 42.9285286409526  
GPR98 58.2401724760744 185.312851727212 451.603052501528 46.3203995372658  
77.0301627655229 44.1350486752012 71.0369238830779 38.6088282130727  
259.220844287491 110.164155258574 90.9641417408475 151.01326330819  
GPRASP1 38.5007204246293 33.3069622728735 42.4580504587581  
37.651298468202 33.9142669203111 37.3799542961839 36.9355798143571  
40.7311497914871 39.7537274655115 41.3321861371202 35.046946054314  
37.6557714476853  
GPRASP2 48.8704059222613 58.3475983630509 67.3469281984384  
53.3967242431461 55.540888910486 88.0277512472211 55.4004611309636  
63.61404854326 58.4891791448514 101.138003125297 78.7260936224802  
87.7295604723036  
GPRC5A 359.733786489623 52.8796369426118 61.356483470053  
44.9370339275041 61.1216330559316 60.4065050472082 92.6545309624315  
91.3607028449916 197.070092523652 47.2299678280724 57.2979215534929  
78.4023698691285  
GPRC5B 51.5888395924843 39.0102066700839 42.9104454767916  
46.8954576545929 48.0234896130991 45.3882138838137 53.0277416531043  
58.676230030835 45.1899271235974 62.6984594468418 53.1505787220552  
45.0985088502363  
GPRC5C 174.058845828966 136.613915120582 115.995213598177  
49.5424425850549 166.910579215196 65.813547096222 190.187931547806  
180.53214143537 375.036941898486 276.550265506988 173.856274004533  
268.38649000825  
GPRC5D 45.0985088502363 41.6466169548846 43.5710871617107  
45.8844325913247 41.6806984441849 44.6524308640784 42.629412460409  
37.86982638952 39.6609238036815 43.0919221375514 38.079222289614  
40.1700117452801  
GPRC6A 43.844855336215 39.8695929627783 44.8872784170036  
42.357910063876 48.6224651100733 44.9896851005259 39.0458123429605  
41.4508241771315 38.8271346375425 44.4652605017595 44.7926323492519  
40.2669497398702  
GPRIN1 60.8357760968871 38.9338521051669 37.0642268327439  
40.8681871019812 42.7107928951766 39.4953494583071 44.2166118829877  
51.2623287419357 48.9931786790166 36.5806287103157 41.8168470823451  
42.0424641526302  
GPRIN3 43.5710871617107 42.7775752471711 40.7620472083159  
89.7554896946341 41.8806343997257 40.7616966228404 42.8684958525042  
49.6203214143464 43.9450023643394 41.1222709786153 46.6442692119997  
40.9683275553869  
GPS1 210.437554813031 176.318618244066 272.315378390681 181.029293055674  
295.917955889194 196.228284571015 327.193250073326 267.85990321012  
346.844545554188 224.173852018278 247.356027979377 150.636903991608  
GPS2 177.65469867262 147.841274204532 188.979306100283 213.204385896543  
148.043320937247 214.774035015293 237.582746634246 158.081235081686  
154.111066539468 179.158053533144 206.559526386642 156.65747550889

|         |                  |                  |                  |                  |
|---------|------------------|------------------|------------------|------------------|
| GPSP1   | 189.984886903595 | 94.1680559848644 | 56.0121021290387 | 75.5431466087264 |
|         | 150.362006499825 | 96.3976093220249 | 82.7083356310191 | 137.878417253635 |
|         | 75.2627855393565 | 67.2968280876013 | 80.7563265626648 | 68.9258122619781 |
| GPSP2   | 110.729504563799 | 124.890309370032 | 140.504336039225 | 63.6334154351075 |
|         | 128.230543301378 | 97.0666517150668 | 215.452117252205 | 144.898757916905 |
|         | 262.9072085191   | 82.6036671634626 | 75.5799609581534 | 127.486023318527 |
| GPSP3   | 58.4920021605316 | 115.840734064724 | 82.8205269728224 | 344.38057912034  |
|         | 45.8051846088552 | 66.8632294055679 | 86.9185256838836 | 37.4484310268909 |
|         | 44.3440839686558 | 67.9259304928255 | 75.8056934060866 | 65.7853960266587 |
| GPSN2   | 672.515393219419 | 807.223772452842 | 1205.82775512007 | 567.978225839768 |
|         | 1178.52115916913 | 574.467486140819 | 831.578043520215 | 647.297964303385 |
|         | 1615.83220398811 | 810.021622878441 | 1109.17675353971 | 860.845934376155 |
| GPT     | 65.9273663561152 | 59.2643906275025 | 42.8270038153139 | 38.9534635879195 |
|         | 46.0043807840705 | 44.0804700754786 | 69.9214859673839 | 63.287067794195  |
|         | 56.1733549054832 | 55.0016608333828 | 53.6895401581575 | 46.3411353377615 |
| GPT2    | 307.002236094206 | 535.585999498708 | 209.251334289712 | 96.3741876853801 |
|         | 303.93332785291  | 103.856444152519 | 878.863554510943 | 395.755223372329 |
|         | 416.246271724181 | 202.278172239082 | 161.793366042179 | 113.198141130994 |
| GPX1    | 901.793120584383 | 875.787532301293 | 696.113365766871 | 1526.94101719128 |
|         | 1000.65752290829 | 748.913487947791 | 932.849256536912 | 550.100918659768 |
|         | 865.63777294494  | 867.856842601788 | 714.990611155096 | 822.822769402853 |
| GPX2    | 119.853516482249 | 1287.41527826233 | 1559.50766982801 | 85.3754356809649 |
|         | 404.440365771217 | 127.596368103014 | 1573.61108703981 | 483.882804472844 |
|         | 2138.23653387331 | 3749.78281766196 | 3428.74022048394 | 6089.64191751349 |
| GPX3    | 185.771041814711 | 509.004054793277 | 178.559242961756 | 321.454824353597 |
|         | 141.577762652792 | 2633.34100695103 | 74.416117986276  | 193.395549316561 |
|         | 72.9752827496503 | 1689.77066894108 | 1533.38581753491 | 1801.44003951248 |
| GPX4    | 1907.47560253019 | 1928.53890809223 | 1731.19220270448 | 2164.51925341969 |
|         | 3343.07293372655 | 3253.86278287661 | 2405.8635632802  | 2220.90215179682 |
|         | 2588.47871581066 | 2678.43227619157 | 2598.78910128081 | 2575.86919902296 |
| GPX5    | 40.2973086894872 | 41.0276561769647 | 40.6737160001291 | 42.2674195935107 |
|         | 38.8456942580061 | 40.4681810792098 | 38.8804689450815 | 37.9837233601316 |
|         | 39.8089320768344 | 39.0648733099061 | 40.4967168818294 | 41.6972107715212 |
| GPX6    | 49.1868644496737 | 44.3529919625344 | 47.0940613507321 | 46.614092935749  |
|         | 52.9433495155796 | 39.4953494583071 | 44.9863726205428 | 42.157627240486  |
|         | 38.1169703906207 | 49.5265949137207 | 45.4799270968969 | 44.0451487108213 |
| GPX7    | 143.194693525776 | 136.293724800658 | 109.251112569215 | 169.818067865324 |
|         | 274.994470779348 | 131.451150955309 | 123.247207157645 | 170.850089909832 |
|         | 110.219274023648 | 119.493400362694 | 114.215602320391 | 95.3145142003966 |
| GRAMD1A | 118.49449420132  | 87.4623442823265 | 124.032371632524 |                  |
|         | 188.713487905549 | 80.257554904218  | 132.985150338484 | 126.500059295217 |
|         | 130.792245267896 | 67.6983931011126 | 114.972374827795 | 113.879493668284 |
|         | 119.263603432127 |                  |                  |                  |
| GRAMD1C | 43.6706764143908 | 52.8796369426118 | 52.2132783757422 |                  |
|         | 44.9370339275041 | 40.4639532172338 | 42.750861693377  | 50.8388984085636 |
|         | 47.8947595316832 | 43.9450023643394 | 62.2025996860055 | 50.3876754565799 |
|         | 58.6481644777552 |                  |                  |                  |
| GRAMD2  | 133.344625514809 | 43.0227387991135 | 51.8122261766744 |                  |
|         | 46.1673159982664 | 47.8075998240396 | 36.3845892764084 | 40.7910160811527 |
|         | 42.8482181313226 | 38.4344387289956 | 41.4397539024976 | 39.8184668132023 |
|         | 58.112348043634  |                  |                  |                  |
| GRAMD3  | 178.643141452509 | 273.981867154936 | 332.745139672471 |                  |
|         | 95.6215575902122 | 158.57392852619  | 102.711934290382 | 138.748233664345 |

|        |                  |                  |                  |                  |
|--------|------------------|------------------|------------------|------------------|
|        | 195.740109330843 | 248.599530435666 | 268.072653271299 | 225.056827821165 |
|        | 219.103786570566 |                  |                  |                  |
| GRAMD4 | 159.937192675974 | 132.588447812638 | 113.102823481296 |                  |
|        | 181.488068017883 | 243.15571937138  | 110.540953771795 | 96.9051967257119 |
|        | 130.533514998688 | 129.042495848264 | 86.500678864429  | 89.8354888041611 |
|        | 98.1220820761255 |                  |                  |                  |
| GRAP   | 50.8826620053386 | 57.493798982912  | 67.9531693869426 | 66.3188075271379 |
|        | 46.4831858524246 | 49.7458652239071 | 43.8664428040913 | 47.131828953123  |
|        | 42.9332735344421 | 46.0727230219512 | 46.5441096202919 | 45.7258895124195 |
| GRAP2  | 40.148780650831  | 42.4493032770053 | 37.2838080935695 | 37.29566077996   |
|        | 39.859345745831  | 41.3553369544097 | 41.253645578517  | 32.1260264272477 |
|        | 37.0126425326534 | 39.1621898366355 | 40.1742127891824 | 42.0424641526302 |
| GRASP  | 59.1311136551108 | 67.5417980425932 | 78.3378279021752 | 143.13189461696  |
|        | 48.1473938886239 | 97.7114610828769 | 54.9765783642973 | 85.9474373829081 |
|        | 49.3780606970538 | 57.4665857273093 | 84.4349803529132 | 47.9566297250148 |
| GRB10  | 55.0667638017798 | 78.0355379907991 | 73.5527788467294 | 60.8662233098324 |
|        | 58.7460488758053 | 105.371285021629 | 56.4809146784765 | 49.3217779272599 |
|        | 73.0855167819246 | 89.6670947876322 | 99.0095802833291 | 66.3944891131864 |
| GRB14  | 42.8447320211178 | 49.4982025424177 | 48.97669757548   | 45.2606665758581 |
|        | 44.4125980509332 | 44.9432309117725 | 55.7405934254857 | 43.282722195001  |
|        | 48.6071208947792 | 45.6223076037521 | 52.1519713442163 | 49.3654837541353 |
| GRB2   | 106.804269453898 | 141.924244643825 | 130.313381811168 | 311.055487966495 |
|        | 131.67159377585  | 127.2070318269   | 140.662969373546 | 95.6731932757489 |
|        | 123.868848519181 | 101.277664841914 | 102.993620677265 | 97.2535496140648 |
| GRB7   | 144.928534157065 | 108.542237471193 | 108.700838142885 | 40.5991006167568 |
|        | 82.260686909201  | 44.5544727111028 | 167.602045390279 | 177.82359682336  |
|        | 187.656257079035 | 93.8630393470857 | 84.3589195870713 | 91.8935361535002 |
| GREB1  | 41.1928222537953 | 42.1995942415177 | 43.6670755115848 | 41.1886975241176 |
|        | 44.0451487108213 | 40.9950639693255 | 43.0930293831497 | 42.2941793046964 |
|        | 41.9097689475185 | 43.2988017098387 | 40.547835538778  | 43.4201407956821 |
| GREM1  | 433.194113859912 | 100.708709225818 | 47.5673419710251 | 230.486681581762 |
|        | 59.6496385170473 | 64.4065381524425 | 43.5627649099623 | 42.8482181313226 |
|        | 44.476519804187  | 43.8943892311541 | 45.310660704531  | 50.5165823866945 |
| GREM2  | 39.3709357615493 | 40.8880530359822 | 37.1643693306382 | 39.9697332660833 |
|        | 39.6535880152834 | 41.8613406887824 | 39.7576136507593 | 56.6910078150745 |
|        | 38.1169703906207 | 43.2988017098387 | 43.4709415392696 | 43.6753843488695 |
| GRHL1  | 50.206880585207  | 58.2571968311834 | 54.8265655909623 | 41.2567470068038 |
|        | 53.9451047872024 | 42.0574848021044 | 51.3064929551674 | 59.499042267068  |
|        | 50.7364620410977 | 47.1863897448202 | 46.972521499515  | 50.8442982601142 |
| GRHL2  | 88.5140510969737 | 71.4197504261453 | 97.9004351588426 | 44.550322123994  |
|        | 282.445037659981 | 58.0095518210499 | 236.565670642447 | 45.2806199505029 |
|        | 129.613152757362 | 88.9738853594498 | 52.104880481326  | 64.1607001437806 |
| GRHL3  | 42.4607795638552 | 194.435776102991 | 86.6655289455628 | 39.6609238036815 |
|        | 118.993842599424 | 53.9517841438975 | 249.822387177805 | 115.643361390258 |
|        | 118.556124582201 | 62.0347191940821 | 82.9431583622036 | 56.6537562775715 |
| GRHPR  | 141.471672990444 | 94.8766888888828 | 74.0913177754682 | 92.084526929319  |
|        | 114.78317743597  | 151.088035451997 | 120.582525405708 | 82.3364971911816 |
|        | 87.1471161251724 | 122.024487499513 | 120.142759111608 | 126.620595729562 |
| GRIA1  | 37.4554876386402 | 42.6022652963326 | 37.7384958256497 | 42.1273928203021 |
|        | 36.4434672195785 | 43.4681646416585 | 38.2933870238743 | 39.2672712041774 |
|        | 46.9739160257217 | 36.4651112441576 | 39.5399188536544 | 43.8575940017119 |
| GRIA2  | 37.8386378737561 | 44.1239711172417 | 44.4311655729487 | 41.6564075217517 |
|        | 38.0598374201407 | 41.2567470068038 | 45.6042625176633 | 40.4359177791566 |
|        | 45.7452456977857 | 44.6918600441328 | 44.553780984244  | 40.2669497398702 |

GRIA3 43.8654109265055 43.8495248991589 43.0971787292711 42.9358255168086  
43.9450023643394 45.9266745571724 51.0889740983457 46.7414272831181  
44.8003345643334 42.3433931248155 45.6677978788306 40.4639532172338  
GRIA4 34.9138625012006 39.1553169409075 35.8894141225349 40.1362682639916  
36.4434672195785 39.6609238036815 39.3999056968598 37.6058760248614  
40.7847110517594 37.1275334308172 36.368850660757 42.6278608611758  
GRID1 40.5654775358427 39.9697332660833 42.4580504587581 38.9534635879195  
37.0526522140242 37.3799542961839 39.3585350448719 39.9576138799997  
41.863927676552 42.0621425894624 44.8872784170036 34.9138625012006  
GRID2 40.8681871019812 42.8542642792862 38.8775560911841 42.1273928203021  
37.0526522140242 37.1317006162938 38.7337086062875 42.157627240486  
38.2215591930186 40.2112371512838 38.8507804383261 35.1451084093692  
GRIK1 39.3303857231606 40.6380495994768 38.1055732602504 36.9912468186322  
37.1565984182084 40.3034574135048 37.3523615196416 40.6171774724171  
40.4220196471124 40.8546470680011 35.1470994647364 42.1537476443423  
GRIK2 43.1413768296576 40.8546470680011 39.7411455670172 40.4359177791566  
41.0885562160946 39.2576865880886 41.0808257270221 42.9301944191913  
44.563243534964 39.7460325887874 43.1724740315182 43.2776458914333  
GRIK3 34.4021554788966 40.6380495994768 40.1985790927248 40.7481155008596  
43.6587492470348 40.244271403831 37.7136011474903 41.3506832276112  
38.4344387289956 40.3235655331796 42.911855821602 33.6902293666089  
GRIK4 37.1485601150873 39.9697332660833 43.6670755115848 40.9607305725196  
37.2567512265363 37.3799542961839 39.1539892144371 48.4670130605028  
42.9020321355927 35.93950183586 39.6403089864678 35.5523662009011  
GRIK5 45.0985088502363 44.2630383225933 40.0998167098057 43.3078542962968  
41.9842695818285 48.6621527194963 38.6243997507646 45.2806199505029  
43.7630587657205 41.2276963324981 47.8988096575648 34.9138625012006  
GRIN1 48.9600850533759 55.6050719338367 57.6371756925687 64.8336014343435  
59.2861879506028 53.7155925246916 51.8812208789107 49.0231541118532  
61.1560835966725 61.2431917618973 59.3615334058994 58.9836017745712  
GRIN2A 39.3709357615493 42.6022652963326 39.3709357615493  
34.5425384901279 43.844855336215 40.650742261428 37.6036146841933  
39.4710743516517 36.4476883897928 33.8984830800739 35.6041926503637  
39.3575468494941  
GRIN2B 35.3227485563945 34.8137085420423 36.769073068743  
31.8431345631453 33.8558232866797 35.314469458379 33.6696565339534  
35.7973685350741 38.6322728994674 32.9981302187884 44.2925355984056  
37.6557714476853  
GRIN2C 42.0532901689036 41.6466169548846 35.4484652445078  
43.5627649099623 46.0977687311222 46.263826584899 37.830876898596  
40.4359177791566 44.1519466943185 38.4187686307607 33.0553208959996  
38.4330755397458  
GRIN2D 44.436995101921 46.4861258030402 39.4710743516517  
43.9282059368202 47.2074332636566 41.4508241771315 43.6753843488695  
42.9301944191913 42.5406888281114 31.6981395162348 36.131485826118  
39.4490233720848  
GRIN3A 44.6231541342 35.9305494063137 40.931294690669  
38.3166554965434 42.0709558258414 36.6271061451613 41.9393838138203  
39.6474008369935 33.1602385985469 38.745552403895 41.2598458726002  
43.9541718254769  
GRIN3B 53.593974682612 46.4861258030402 39.2707964550441  
49.3654837541353 51.4527545197672 43.2805590023412 38.6243997507646  
43.1567024035183 44.619512785899 52.3304586399695 41.3553369544097  
40.5703581862752

GRINA 365.517719684028 518.527535205975 402.794855141389 829.152040996817  
323.048740324895 290.371909722404 381.198152331624 288.335410596699  
336.679355848349 384.919835924792 396.493831159481 191.116764060948  
GRINL1A 45.8718712965322 49.7293832352456 48.5544398725959  
47.2867027408452 47.608637584681 52.0038114601109 47.3773591105902  
44.6107027295193 53.0208478294567 42.023861273923 47.9233782645011  
47.9136803939857  
GRIP1 43.2724556187214 41.8534933577029 42.7881985796277 39.2406797798509  
43.844855336215 41.4508241771315 41.8315602975157 40.4359177791566  
45.4799270968969 37.7598032934773 41.2598458726002 41.2437378488025  
GRIP2 37.1485601150873 40.4904698474072 39.7697110924474 40.1804147506786  
39.5357194705749 38.2971553419489 42.4939802311136 39.9576138799997  
41.1241827976738 42.233842834629 39.9899430628542 42.7275315121163  
GRIPAP1 533.820505121067 335.002151198999 385.827237353675  
487.540800793233 288.065258507995 260.279110870904 502.205366225368  
788.950470077369 307.754078087321 892.323580265478 860.265067346622  
710.579735673002  
GRK1 48.6621527194963 47.5647821785529 42.2577689927563 44.0451487108213  
44.2607789091176 39.2248354955045 39.8695929627783 40.5158867964016  
40.4997186069494 46.1390887492649 40.8225507267584 45.1735152121056  
GRK4 44.7520317855773 45.5506835119207 41.3755760434934 44.4978265168756  
42.3536549114165 47.4699236780425 42.0605906240248 46.9986083378817  
41.2870505273664 44.9536076475946 43.5258090162298 50.3334140358007  
GRK5 51.9545473262296 62.843734579668 60.1444334141838 68.6379135603075  
76.9788081114727 124.362644216178 45.7452456977857 63.61404854326  
50.0802438185974 78.839411865787 67.9922604709859 83.8679756709676  
GRK6 67.7189686993694 75.854888525664 63.6894484284172 96.0126406688619  
65.6003544901554 61.6219790276408 87.8746766762445 79.0373265781543  
91.0154871536701 58.7460488758053 57.1441484662045 55.1804535845496  
GRK7 32.3120809246762 34.5023764006976 42.0621425894624 38.5252456306656  
34.6227169056411 36.0306975524309 32.4466419672036 38.1835938174625  
38.8271346375425 38.957687788868 36.9060997041453 27.0325093564553  
GRLF1 37.5058442851529 41.2276963324981 39.3344387353654 43.3744503319109  
38.7937049365871 42.8598805316863 40.6130792100165 39.0102066700839  
41.3481355128089 40.8462613935508 41.3884410579735 38.9074189954657  
GRM1 38.5007204246293 36.9994058279362 38.9790184198145 39.2780515621926  
41.5668884168669 40.9506062495231 40.1235656101329 40.2382908228517  
42.4540072551568 38.3092241935352 37.4642807402741 37.4554876386402  
GRM2 64.3502363726659 54.8439819445945 57.423873475544 48.309866878365  
47.6884372645373 45.9266745571724 67.3976855661302 52.1788489555942  
54.4912806027381 48.4890615340603 55.0404566626821 50.4847465816184  
GRM3 44.8378856799291 43.5627649099623 37.5222959113204 44.7980740332174  
41.9397336249742 41.0012755104374 43.9450023643394 44.5658219748173  
40.8970401536578 38.6835649080278 43.9063490244748 41.2437378488025  
GRM4 68.9745034946434 42.5269793679335 38.0452862258803 46.4555908533915  
55.3100442506299 44.9896851005259 49.2546642180676 45.642304356051  
46.1101825640108 39.7835513496873 40.723990462047 42.9887069977696  
GRM5 31.4517139158876 39.0102066700839 43.5710871617107 37.9875302985336  
40.0599807618105 44.0804700754786 34.0777108441756 44.1311654985682  
37.8319142847141 39.6719190054379 38.079222289614 37.3600014814388  
GRM6 35.3227485563945 35.1224289925572 33.4240466670776 39.7411455670172  
33.4316681623175 36.6996187567892 36.9355798143571 35.0510338774593  
35.5220586859301 41.1222709786153 39.6403089864678 38.0452862258803

|        |                  |                  |                  |                  |
|--------|------------------|------------------|------------------|------------------|
| GRM7   | 41.3387790895716 | 40.9298924777825 | 43.0971787292711 | 44.0451487108213 |
|        | 40.0230205296014 | 41.9097689475185 | 46.0905079010237 | 43.781101409552  |
|        | 41.7627910693483 | 44.0578434007778 | 44.1478805895017 | 42.357910063876  |
| GRM8   | 47.0940613507321 | 52.502055890816  | 56.1434024065079 | 44.550322123994  |
|        | 50.5110359971301 | 46.4648868771662 | 40.5585676679482 | 45.9604707098953 |
|        | 39.9444191873552 | 65.9189023794337 | 47.7535797917441 | 44.1452943804044 |
| GRN    | 619.337575854369 | 623.574706535278 | 966.803172864162 | 1157.65264077595 |
|        | 649.487838020327 | 397.850286751468 | 454.701322158431 | 527.97309138633  |
|        | 945.065986430527 | 440.728435508514 | 448.383843915421 | 338.475097952023 |
| GRP    | 75.9909523932333 | 39.3667161654772 | 36.9795961564828 | 38.9534635879195 |
|        | 36.4809590448114 | 41.2567470068038 | 39.3999056968598 | 41.7419877611072 |
|        | 39.4433784795209 | 37.8217989841918 | 41.7651272076914 | 40.9683275553869 |
| GRPEL1 | 146.173307474688 | 352.600793906035 | 228.328635242684 |                  |
|        | 220.11066803442  | 429.983084929605 | 311.901423694475 | 258.851412005402 |
|        | 162.993316022946 | 292.065366215278 | 141.386644354989 | 168.561260174501 |
|        | 258.757703729905 |                  |                  |                  |
| GRPEL2 | 149.629940171074 | 159.667153030627 | 160.264217082275 |                  |
|        | 116.852483297949 | 175.362103430164 | 137.551493752877 | 155.406719968961 |
|        | 207.600413958886 | 225.725485439572 | 176.07173250529  | 149.076166432567 |
|        | 121.259683158193 |                  |                  |                  |
| GRPR   | 44.2350046179299 | 44.2630383225933 | 42.5406888281114 | 41.7144525110048 |
|        | 44.7829632472754 | 40.7063426028871 | 42.7431359850339 | 43.5544347011646 |
|        | 42.5864346233886 | 37.0740019672788 | 38.6335676551747 | 41.863927676552  |
| GRRP1  | 52.4518619184838 | 75.2519194195288 | 71.6849360818041 | 109.310200749289 |
|        | 70.9638091288679 | 156.088284999883 | 57.9583667603818 | 76.1493261430901 |
|        | 47.945438269111  | 69.4131195465674 | 145.28255999556  | 70.5903356985988 |
| GRSF1  | 435.094968715663 | 517.664764759512 | 317.892699374852 | 252.870708814507 |
|        | 291.596692248591 | 277.878824242495 | 284.942182200489 | 234.495626550751 |
|        | 486.757854744053 | 404.599730419192 | 301.867441371793 | 282.38663225575  |
| GRTP1  | 82.6246523811721 | 164.146682514925 | 87.6960277122561 | 46.0228732507872 |
|        | 138.349952332963 | 60.065511140146  | 138.748233664345 | 82.9322141700549 |
|        | 121.449647909665 | 110.219274023648 | 145.583868248675 | 96.3918711895208 |
| GRWD1  | 320.330057050615 | 220.010492114456 | 226.262409390222 | 162.833785414988 |
|        | 354.015808474189 | 223.801865347687 | 188.750770811584 | 255.800286504974 |
|        | 306.746364062777 | 205.944717184567 | 321.069136463599 | 196.17328008185  |
| GRXCR1 | 42.5193208629123 | 39.5050383901884 | 41.6079958749402 |                  |
|        | 37.8442841690502 | 46.4343327861696 | 45.6129956328415 | 41.3594868055879 |
|        | 42.6450179841129 | 40.6957787921451 | 38.3092241935352 | 43.7585538437696 |
|        | 43.5738557773903 |                  |                  |                  |
| GSC    | 49.4151347850687 | 39.0102066700839 | 37.8386378737561 | 58.3475983630509 |
|        | 42.9090346219023 | 49.8472708021525 | 38.7337086062875 | 49.085741080241  |
|        | 36.8127605061228 | 35.0668743708816 | 39.0550139257658 | 37.0953622406687 |
| GSC2   | 38.5648843914189 | 38.9338521051669 | 39.4710743516517 | 42.2496337895968 |
|        | 38.0598374201407 | 37.3799542961839 | 34.5633623842083 | 32.4466419672036 |
|        | 49.9162522057712 | 41.9666541498638 | 37.5583886316038 | 40.7704587752083 |
| GSDM1  | 42.0532901689036 | 47.4076235350059 | 50.5089777244781 | 40.646702696033  |
|        | 55.1563703466328 | 54.3478800757394 | 40.7910160811527 | 38.2782436497441 |
|        | 44.0519245668737 | 43.844855336215  | 44.4688999098904 | 45.9693232070002 |
| GSDMA  | 41.9407041937973 | 57.0875538213735 | 42.4580504587581 | 48.4916117779992 |
|        | 38.5512429290626 | 51.702461863489  | 45.8980298854198 | 46.1673159982664 |
|        | 42.6366765186182 | 42.1622837416589 | 43.5710871617107 | 42.8864415494484 |
| GSDMB  | 135.41852974791  | 243.672418126374 | 285.322305931794 | 79.9126192278104 |
|        | 187.147252401703 | 68.7342341724306 | 179.767874494671 | 287.565588186962 |
|        | 251.027270265657 | 168.869258524932 | 255.126812649967 | 180.447835336714 |

|       |                  |                  |                  |                  |
|-------|------------------|------------------|------------------|------------------|
| GSDMC | 152.86270446968  | 46.8236022402545 | 81.5782824513693 | 54.1240583139871 |
|       | 46.3150221024046 | 39.2985791324641 | 40.6750540874299 | 48.9826868640753 |
|       | 52.2631308081333 | 46.0119912782855 | 47.1477056711335 | 93.523394623588  |
| GSDMD | 557.094756796515 | 446.757901018137 | 336.679355848349 | 327.283431584541 |
|       | 245.960009147234 | 222.773939093637 | 298.924873508403 | 191.811190401876 |
|       | 286.996922972683 | 328.080879084015 | 308.183340806373 | 243.763402918148 |
| GSG1  | 40.0557788909923 | 41.7656868106485 | 39.7411455670172 | 39.3427411763067 |
|       | 40.8873907150245 | 41.5146360101556 | 43.4544762830742 | 40.2906799807722 |
|       | 42.8414096678708 | 36.5806287103157 | 41.6616444147804 | 38.7119440509409 |
| GSG1L | 51.7607563002005 | 61.6878176260761 | 56.8595344107711 | 91.7068354379889 |
|       | 72.828269171954  | 65.6914955077809 | 73.6855877240541 | 54.5125550937898 |
|       | 64.3425836997629 | 64.9959712888709 | 51.6414075056938 | 62.3997407955361 |
| GSG2  | 54.8439819445945 | 49.6203214143464 | 51.0539624358342 | 43.5627649099623 |
|       | 60.9710783023013 | 39.2985791324641 | 68.5725871332774 | 52.0503062610092 |
|       | 55.7522234735038 | 42.785429206422  | 38.2795150354677 | 41.2437378488025 |
| GSK3A | 48.3814421939888 | 47.6229101519945 | 47.4740726032707 | 37.651298468202  |
|       | 48.6224651100733 | 43.9724628401189 | 46.9929836306816 | 44.2159020605784 |
|       | 43.4656637536244 | 41.4397539024976 | 49.7363778831003 | 47.3172462673426 |
| GSK3B | 181.966839676473 | 158.449570606242 | 191.668846959973 | 284.795064481553 |
|       | 235.593721159442 | 114.142157259903 | 267.523307072523 | 246.965844426351 |
|       | 262.024495926094 | 169.838827072973 | 132.007307754378 | 146.389547177092 |
| GSN   | 169.061093538895 | 112.733531624555 | 122.952515297686 | 220.11066803442  |
|       | 67.3568864741196 | 1554.42895572029 | 130.812376632261 | 88.6368226476614 |
|       | 67.7898066939846 | 776.670493028756 | 609.243908604949 | 433.637087338002 |
| GSPT1 | 1126.31998762007 | 1086.12171444149 | 1630.25992078321 | 858.228943026906 |
|       | 1287.41527826233 | 619.950241162173 | 1224.80240464583 | 1858.94179312821 |
|       | 1255.10866316499 | 856.196444531264 | 723.853348464335 | 1024.97546870349 |
| GSPT2 | 78.7450149191851 | 131.79241580689  | 58.4137028673494 | 135.553887060537 |
|       | 127.008218054726 | 136.377736482671 | 126.63987648161  | 112.930164222877 |
|       | 131.929700183999 | 138.765621737736 | 106.20479137406  | 127.093495914275 |
| GSR   | 74.9491421278749 | 61.8124171056747 | 88.9255521472874 | 64.3746985855249 |
|       | 57.8039717833131 | 69.64983895075   | 82.5050369860039 | 70.2541961995753 |
|       | 83.9387217886961 | 68.2708120569221 | 65.0359415104302 | 72.8306652548968 |
| GSS   | 293.355303451014 | 256.165801611585 | 290.316757790733 | 152.545682001987 |
|       | 287.932410610182 | 151.088035451997 | 316.373650015333 | 206.559526386642 |
|       | 278.303493506139 | 279.782392390288 | 246.313146942736 | 227.439319520245 |
| GSTA1 | 44.7520317855773 | 43.5182502375207 | 91.4581948567397 | 37.651298468202  |
|       | 40.831207953647  | 38.1169703906207 | 54.4934782594218 | 49.2019743609873 |
|       | 86.754538970161  | 40.1613888954735 | 42.1537476443423 | 42.4607795638552 |
| GSTA2 | 42.0532901689036 | 40.7602938767524 | 69.4967762263181 | 37.3600014814388 |
|       | 38.4135023167287 | 42.5660695551615 | 48.739479557328  | 40.2770232552555 |
|       | 75.2779848783367 | 41.4659679379482 | 39.4749602565407 | 41.863927676552  |
| GSTA3 | 44.4639405506967 | 44.1239711172417 | 40.7620472083159 | 48.4916117779992 |
|       | 46.8086806989607 | 42.1046072075724 | 43.5627649099623 | 43.7731874801003 |
|       | 43.1805016690297 | 43.1839109702714 | 44.9081227425497 | 45.6233434183356 |
| GSTA4 | 67.2437599548936 | 76.5411379733694 | 89.2285288333749 | 60.620259884953  |
|       | 105.825228126465 | 126.485649460666 | 59.6780848951767 | 61.7572675712557 |
|       | 72.0655217037557 | 103.521926015878 | 91.6826894933058 | 73.0333258448698 |
| GSTA5 | 35.9305494063137 | 37.3634897565502 | 40.301483914446  | 38.8495095797881 |
|       | 39.4693871570028 | 40.1428591998404 | 43.9450023643394 | 39.9576138799997 |
|       | 41.7627910693483 | 38.8507804383261 | 35.046946054314  | 39.7411455670172 |
| GSTCD | 72.5516795240251 | 79.5270065657539 | 62.8753829543444 | 85.7013212907541 |
|       | 80.2027893085758 | 96.4740168904128 | 73.5700402711904 | 71.5345397102823 |
|       | 94.1680559848644 | 84.8193235226936 | 91.7296524744575 | 85.6582555450821 |

|        |                  |                  |                  |                  |
|--------|------------------|------------------|------------------|------------------|
| GSTK1  | 1188.3486464341  | 1129.71973548345 | 2568.97574985073 | 962.079396754147 |
|        | 1280.77934331703 | 738.059797123491 | 629.763102939071 | 882.105892529265 |
|        | 1199.29782389306 | 1483.40077183826 | 1247.50618540769 | 1046.42391243532 |
| GSTM1  | 147.033637977077 | 282.68881112438  | 257.050603883498 | 640.407302868904 |
|        | 7562.42822724655 | 1561.83892117664 | 228.809697062726 | 10351.5373412096 |
|        | 123.729687262037 | 4550.56817942699 | 451.437791473506 | 246.965844426351 |
| GSTM1L | 38.957687788868  | 42.0709558258414 | 42.9104454767916 |                  |
|        | 39.6292788039793 | 43.3332476888305 | 41.159706131351  | 41.5817737564592 |
|        | 49.2901038327894 | 40.4220196471124 | 40.6022003765153 | 42.0750889188255 |
|        | 39.7411455670172 |                  |                  |                  |
| GSTM2  | 151.175959542368 | 374.601792595646 | 357.668448180268 | 779.333013700435 |
|        | 8144.52133665388 | 1925.20977162704 | 101.410859084491 | 10996.2779403491 |
|        | 89.7184505543918 | 5636.93532853955 | 623.574706535278 | 331.173265739654 |
| GSTM3  | 76.0532592222027 | 51.4413099192899 | 46.3411353377615 | 60.4646208319121 |
|        | 187.002948435359 | 511.067537752967 | 70.7238101239421 | 102.00080367858  |
|        | 46.4861258030402 | 1035.67547271468 | 381.198152331624 | 179.581456201363 |
| GSTM4  | 52.3660712483179 | 61.657921069449  | 54.9944485073259 | 49.085741080241  |
|        | 81.6949047529395 | 69.6021553604792 | 58.9656737189764 | 63.8008894786105 |
|        | 50.7619345314571 | 67.2437599548936 | 47.1970991228159 | 52.7847097260565 |
| GSTM5  | 44.7044140979108 | 44.6918600441328 | 39.6451483836089 | 39.7411455670172 |
|        | 41.467005949568  | 196.17328008185  | 43.6753843488695 | 51.9447450229707 |
|        | 38.2215591930186 | 152.880772824839 | 129.236597599908 | 60.8662233098324 |
| GSTO1  | 971.856840043688 | 1335.4111951034  | 1097.92519921873 | 2944.3433949897  |
|        | 738.059797123491 | 1123.99110499679 | 897.198663109723 | 831.578043520215 |
|        | 698.595302020108 | 1282.9181829891  | 858.228943026906 | 1372.51401036753 |
| GSTO2  | 58.1027665533767 | 267.608189207303 | 430.868309653765 | 48.4916117779992 |
|        | 257.325282051981 | 73.1169003714219 | 297.105654460146 | 106.140215438654 |
|        | 304.49707512712  | 574.467486140819 | 377.573838771285 | 401.202348352506 |
| GSTP1  | 1390.12380748446 | 3618.78958408675 | 2424.0414102425  | 1686.40194722823 |
|        | 4048.33132153903 | 2280.42953098693 | 6356.05807792831 | 3502.80810319252 |
|        | 4344.25847766877 | 3428.74022048394 | 3999.32180022337 | 3786.90274075023 |
| GSTT1  | 317.127679512963 | 36.89524015739   | 358.402309513947 | 295.014183084118 |
|        | 69.0975200641705 | 698.105755081829 | 1339.29022988209 | 714.990611155096 |
|        | 482.071795051342 | 37.4302011516587 | 445.016226732679 | 727.788854407888 |
| GSTT2  | 47.0940613507321 | 48.6447083765118 | 50.0526763693329 | 39.5637454855233 |
|        | 86.6854406823303 | 49.5424425850549 | 49.7462241109067 | 49.1330497909043 |
|        | 51.0062122023297 | 63.1394716239975 | 63.5716064500377 | 51.3872161199373 |
| GSTTP1 | 38.385865183581  | 37.8217989841918 | 35.8265993915844 |                  |
|        | 47.481302504066  | 38.6454098044474 | 37.3799542961839 | 41.253645578517  |
|        | 37.86982638952   | 38.7298222155532 | 39.2623423164488 | 41.3553369544097 |
|        | 36.9976231206067 |                  |                  |                  |
| GSTTP2 | 59.0965219753805 | 50.8559467080729 | 54.8317492967714 |                  |
|        | 48.1662933382789 | 50.6987358483181 | 45.8325181856483 | 64.0476795495651 |
|        | 79.7170181855209 | 47.3102170376006 | 77.5413980345198 | 67.4760456862775 |
|        | 59.2720151666582 |                  |                  |                  |
| GSTZ1  | 50.7903824729818 | 48.4980626712175 | 60.5060523570927 | 54.9961068897605 |
|        | 47.7448435500604 | 46.2027193115397 | 54.2625553617642 | 51.6060290544385 |
|        | 50.2931656908095 | 72.369223065749  | 70.8835636550472 | 56.2387806424733 |
| GSX1   | 34.4896350146096 | 43.7644428186265 | 46.7508829977587 | 31.6357375926754 |
|        | 35.2163900400329 | 34.4896350146096 | 38.2933870238743 | 34.5886782974123 |
|        | 33.3643994200057 | 43.0919221375514 | 41.0050831223107 | 33.0217499673686 |
| GSX2   | 33.4902421268456 | 38.8336427948187 | 39.991353369336  | 40.3180310664156 |
|        | 36.8059561571675 | 38.3418933808844 | 38.7337086062875 | 33.4534810696886 |
|        | 39.6609238036815 | 40.7063426028871 | 35.6041926503637 | 45.8546719310325 |



GTDC1 54.1745577382276 51.6591854913499 54.2978574294868 56.5583372864784  
49.2495730217753 57.013135787334 44.9272279146193 54.9169289331775  
49.1940901905636 49.904979214379 53.0446815750355 53.9431600945419  
GTF2A1 42.0778399888414 41.0269624684418 43.4709415392696  
41.0726336841311 40.5207392413115 40.5912213523345 42.7431359850339  
43.5738557773903 41.5635499110307 43.5599890586394 45.0071770692626  
37.7357214460683  
GTF2A1L 41.8409927585705 40.579168499767 40.7256433650856  
39.6292788039793 41.5668884168669 47.798305839406 39.824238926666  
42.4580504587581 41.0381860307445 44.858845220285 44.5851823170508  
46.1005394461164  
GTF2A2 413.31638457585 327.786619565391 218.313812956524  
303.458085392002 432.945510073269 351.700618429121 470.676006277762  
404.524605612471 355.351648424266 176.318618244066 203.870471031175  
415.15150032168  
GTF2B 275.549982777518 226.090904721424 191.298525555624 239.229093340475  
198.754967214875 227.404530886674 213.622816589927 265.467750156221  
118.93749473833 150.829277770546 159.667153030627 211.625447303889  
GTF2E1 115.221134337342 95.9750691854349 93.6591201235745  
118.49449420132 126.711833914667 98.8478655411492 93.9805435116156  
81.2850357499192 102.457537266105 81.7171463878604 70.3381994440425  
96.8141712830545  
GTF2E2 715.662312404643 469.893430869091 802.036670929858  
558.855313555287 357.029998842776 531.69595054137 584.889303693522  
344.314901683001 534.292112344761 571.790034754076 479.507453857294  
734.143790759359  
GTF2F1 186.818097299665 278.629995328901 210.485586903711  
219.103786570566 421.445268560815 199.57367025082 259.332340491331  
261.6201598868 209.986313475002 303.323289734056 284.795064481553  
197.660480001139  
GTF2F2 637.824136761292 294.620463776036 283.484056482174  
290.316757790733 315.799449362526 384.401256392893 368.972794063004  
326.605198138576 353.598144765197 318.768560912915 296.271895016431  
368.246708866999  
GTF2H1 52.0756619340684 52.8455400026194 55.2141529491512  
49.9672547361866 55.6617952786921 59.2643906275025 43.4544762830742  
53.6210959113222 53.5224822626949 55.2214187655851 57.6171094774963  
60.6441065119394  
GTF2H2 42.9104454767916 49.0697565324841 45.310660704531  
43.6726153508978 42.7107928951766 41.8613406887824 45.223075311113  
43.844855336215 42.0621425894624 39.0648733099061 44.0409178714232  
41.4508241771315  
GTF2H3 53.4921736109774 73.6036945547683 139.883681090758  
70.0402992940342 156.822939275312 90.407200101342 76.3583555666815  
64.893664076381 70.4262478188233 46.7646877499666 68.7091708087448  
61.9882398986333  
GTF2H4 322.169157552725 205.695230410884 228.134171304754  
138.053682842992 352.997455210484 184.466097348908 363.602775933416  
209.178131628825 263.706801812277 186.522518256229 166.608353896248  
135.398193235699  
GTF2H5 846.773659307087 277.5073518536 401.817698574441  
273.231509963261 244.736442646499 426.622204035624 242.58992925232  
409.899024157206 298.54401957868 311.1022748407 272.36028618845  
593.345148568451

GTF2I 50.8930565655395 74.2984889814139 74.5173894803763 44.1483976313959  
70.2565873027242 54.9108046955355 55.9656969281284 46.7980335276155  
66.8188271427672 50.4234835272833 47.1477056711335 57.0006212637829  
GTF2IP1 160.962078065068 369.258587948416 328.176884082116  
108.660169650259 260.383969219887 175.193752938517 198.497745548245  
151.088035451997 270.756849919679 96.2799270895937 140.175068871414  
212.945601743319  
GTF2IRD1 91.1363393944977 87.6763065012524 95.0738959950301  
46.614092935749 109.398472684587 79.7564155881026 98.5663841503803  
107.325456368022 159.554916039519 74.1228645930185 76.9904391375645  
68.7091708087448  
GTF2IRD2 54.3554233228353 56.463481075522 63.9148277361329  
44.7980740332174 71.0593419018503 86.3888090084564 63.1604223919703  
46.5717043290731 57.2716485658185 53.4109882045447 52.5154971256566  
61.2108152457954  
GTF2IRD2B 136.843285454801 176.816741656659 141.376779431031  
111.626292905866 171.829798001437 141.594428857706 205.695230410884  
85.8277891453447 287.247399926139 79.8511759086625 87.7253906521723  
95.2367177680328  
GTF2IRD2P 46.0398513158469 50.9643363406241 47.646800205189  
43.2504382247503 54.3668215761835 65.5029051840465 45.3597029614942  
43.3262148375525 52.8502823653368 58.8605811695948 60.1756087584664  
61.2441059007934  
GTF3A 949.278493776928 705.283979182062 818.927157206447 1137.99307039386  
439.664256107097 823.933615182634 784.268074988084 1053.67279913417  
744.762787024945 756.801598119483 673.522667186915 979.468753716758  
GTF3C1 173.838110431513 130.35828139117 168.482495410546  
81.0057400164851 179.322661675979 121.613731804111 114.230358276599  
210.200786815048 135.706144105357 115.853867920678 160.499410146402  
85.3431175579775  
GTF3C2 288.386446189379 332.830805115112 239.792011765323  
171.501864800548 326.121479451246 172.506486240017 313.399524593316  
314.609371608151 254.579513401792 244.498602338731 210.38953368311  
179.953662481428  
GTF3C3 185.227637763623 228.747320301945 221.598637828404  
141.852330109472 210.73006676203 157.109085253328 137.764748752401  
171.058650956601 188.750770811584 174.058845828966 179.064697219173  
191.482692108417  
GTF3C4 37.6397652536077 41.0678614026819 42.2577689927563  
45.5869891570251 40.148780650831 43.2805590023412 39.4600924554505  
40.7311497914871 38.4344387289956 38.3092241935352 45.9104478407175  
43.6753843488695  
GTF3C5 260.124930930243 216.404466544919 137.831070407907  
154.287396750021 254.639522735592 126.485649460666 384.992066112903  
175.798140574991 258.657801126493 244.389359320438 233.07404514708  
192.861174667738  
GTF3C6 208.67074469962 135.377859777529 130.230482445573  
114.734157967466 83.764882413379 108.323780226301 120.327382682483  
328.387270297393 105.376705821141 69.8941497035747 80.7198077526005  
108.337776546183  
GTPBP1 50.6473771879221 48.7847528954724 43.3085358214154  
45.1944222548351 37.0526522140242 47.6803619768589 41.706879587091  
49.8344973836834 52.8502823653368 49.3000844711116 45.2265319826548  
47.2131144508464

GTPBP10 44.1737502492846 50.9895771651972 45.3675390992851  
42.8235313007746 46.4343327861696 44.6024422254257 42.2577689927563  
49.085741080241 48.4497719907777 39.9519547348106 45.1778228816327  
42.9887069977696

GTPBP2 67.0163226819964 59.0709442090059 54.9944485073259  
61.5515639412892 59.6922302604696 50.0748292497578 57.51482768194  
50.7364620410977 64.7116910405493 58.8022152133979 52.902043370862  
58.3586374083245

GTPBP3 106.454367084321 136.04447103201 139.022985518859  
72.4834467838798 260.740251007349 83.5274372175811 107.40295615514  
137.156113501125 120.19033659661 121.023370640285 113.6408244935  
105.699748702315

GTPBP4 561.855286945959 610.502562878788 419.741944629785  
372.131471268346 1173.47285626656 427.066481790415 776.670493028756  
345.942093303061 542.069156178791 323.095468495074 297.701126167694  
440.93348620369

GTPBP5 45.0985088502363 41.8848959280916 46.3411353377615  
47.481302504066 42.6022652963326 46.1513019317765 45.223075311113  
47.4740726032707 45.4799270968969 47.8207974930031 39.7342718293432  
47.6040671292013

GTPBP6 537.342146022804 507.851120677089 402.221227674218  
406.500583302121 351.290929267326 550.100918659768 617.271611375695  
667.837116137964 683.75696650704 608.579654909865 704.942710834565  
437.148137705103

GTPBP8 61.6858759579955 74.0420372528779 85.8059456975413  
74.3292739001607 113.518333340953 79.4053001255904 78.3082773071531  
69.5225793065367 72.3095457386378 59.4969799685856 63.8558858499025  
73.4687357112674

GTSCR1 41.4508241771315 40.5400384479766 44.696023817801  
45.7397504535169 42.6022652963326 45.1873487463472 46.0228732507872  
45.8669209716694 42.9020321355927 42.0621425894624 40.6373400186325  
39.8497227447888

GTSE1 71.6849360818041 71.2370255410834 58.112348043634 55.6481366056639  
104.072423445726 48.260931742163 84.3526980051279 69.0819394834919  
88.8772406115484 39.7835513496873 46.6442692119997 47.2131144508464

GTSF1 37.7384958256497 62.3983214098965 42.2577689927563 41.3027031037343  
36.6354013629791 52.3187919317561 39.3585350448719 38.3684202018524  
268.38649000825 42.8936990772838 39.3667161654772 37.6557714476853

GTSF1L 40.2087556903277 36.2561152084183 38.4456289125816  
41.0219290963778 40.4639532172338 36.0537855103446 37.5469247328848  
38.4128104869434 39.4762546236449 38.4187686307607 38.1253290586431  
39.6352613956998

GUCA1A 39.266565827316 43.5182502375207 44.6032218589199  
43.6726153508978 41.9842695818285 43.0860383229288 42.0605906240248  
45.3872406432794 45.3756389170606 57.2813205536176 51.2318935933116  
42.9887069977696

GUCA1B 53.8133030091912 48.4497719907777 45.5883690965192  
39.7840818430159 42.4493032770053 44.3648993568405 46.9929836306816  
51.4360013601805 54.5374188496807 51.7594352155304 48.5292718280498  
60.4872675915085

GUCA1C 49.8472708021525 47.2055133646385 42.640829914102  
51.949834638817 50.0580547772867 50.2163892855092 45.3597029614942  
54.5125550937898 50.7619345314571 43.6033221838149 48.3847843498476  
52.4992300612807

GUCA2A 41.0608773166058 50.164201758929 43.7630587657205  
39.3750969348308 42.7982502551634 39.9397419279057 45.7452456977857  
46.5717043290731 44.2607789091176 42.8936990772838 41.0050831223107  
38.4330755397458

GUCA2B 40.9558083259517 40.2493681589104 36.2683886571585  
44.0451487108213 44.5668141895992 37.8102105794655 40.5585676679482  
45.5581356216957 43.2761454096265 40.8970401536578 45.2265319826548  
41.4508241771315

GUCY1A2 72.4966502412724 46.8954576545929 49.1067959632109  
57.4595416719581 44.7829632472754 43.1826328292558 44.9863726205428  
43.0390857698452 44.0519245668737 48.4890615340603 43.9450023643394  
43.4709415392696

GUCY1A3 115.995213598177 77.8946473414547 71.2681122787939  
143.973063517706 60.7495043977707 90.1080159649841 60.4593810615882  
57.2350830635912 57.3005868295668 51.2786187688564 52.022479439889  
46.4952206446229

GUCY1B2 58.8224410806741 41.2598458726002 73.4962349716902  
51.3851157261451 41.2740822675592 44.1737502492846 65.524821699432  
73.746472097049 43.8482802038826 62.1035858593388 62.6048727240291  
50.8442982601142

GUCY1B3 58.3702889417801 45.2556760873335 49.3000844711116  
48.856176220627 55.6069214673486 49.1013967533186 47.1345949868029  
43.1567024035183 50.0526763693329 44.4652605017595 46.824299585607  
46.917149434588

GUCY2C 40.8681871019812 40.5400384479766 43.7630587657205  
43.6726153508978 40.9950639693255 37.9951997351435 39.0458123429605  
42.0494116081998 37.3600014814388 39.0648733099061 41.0808257270221  
44.2527566343661

GUCY2D 40.148780650831 43.7644428186265 43.4709415392696  
41.0726336841311 43.6587492470348 40.040778349137 40.1235656101329  
44.797320243931 44.2607789091176 47.0055981216687 41.6336636285875  
49.3984571719129

GUCY2E 42.1537476443423 43.4396866157171 44.2405728317107  
40.5484717678957 47.9128504683618 41.7627910693483 39.2533668167483  
41.4508241771315 37.2810767789306 43.6033221838149 45.0589947942306  
39.6352613956998

GUCY2F 33.0463640202858 42.6022652963326 41.437237454134  
38.3166554965434 38.6454098044474 42.8598805316863 39.8695929627783  
36.9355798143571 39.1790517315259 41.5435611403119 41.6336636285875  
41.0657892043496

GUF1 59.7179445506128 89.8234189405239 75.8201286658785 81.382229980722  
85.6236091398006 62.2818512646893 72.8653205184014 118.93749473833  
77.9978216366573 59.2628513357357 57.0154839296649 67.9850517608624

GUK1 900.517711546397 1050.05355467301 1436.67510926345 1033.99699402259  
788.232434009173 1575.71609894038 1041.84536202049 787.671342652389  
917.179747195874 1019.67015337432 943.73554571528 740.994425128952

GULP1 49.8472708021525 42.6939394537076 39.5450079747895 45.4634652319753  
46.6397391251762 87.539553421006 43.9450023643394 45.7476095696859  
40.5912213523345 47.7180816682562 48.2910530887214 43.2776458914333

GUSB 221.847615564378 361.158558609751 457.502917254598 453.260719561292  
346.116601612353 292.156216736355 343.764108830519 290.448089141121  
615.442484911026 277.837785971587 215.399634344016 317.892699374852

GUSBL1 139.543015878846 239.792011765323 244.343381048643  
194.225364352044 161.65846687852 164.780216383719 186.840847924376

|         |                  |                  |                  |                  |
|---------|------------------|------------------|------------------|------------------|
|         | 155.872353189452 | 233.96534264787  | 147.371811804618 | 199.634544522948 |
|         | 148.71330612986  |                  |                  |                  |
| GUSBL2  | 57.6285775590145 | 50.8812920005251 | 60.6567691532561 |                  |
|         | 71.9062462001972 | 69.493532577364  | 59.3618843678775 | 93.748984888348  |
|         | 96.6957892186886 | 58.174555206394  | 57.4665857273093 | 73.0247140074919 |
|         | 67.5047089908724 |                  |                  |                  |
| GVIN1   | 56.6086202928268 | 88.6663961027926 | 79.3066495980045 | 297.023913988137 |
|         | 55.6991707857987 | 48.1591264215184 | 51.0013344286851 | 88.4439480366515 |
|         | 47.0804681460898 | 83.1874704625702 | 148.440257128143 | 49.2064066614865 |
| GYG1    | 237.161912299581 | 394.00931573564  | 408.080620074472 | 524.972936438175 |
|         | 426.622204035624 | 739.541009338849 | 362.927960895643 | 294.966924715506 |
|         | 316.831358204198 | 449.564281713066 | 447.709872889701 | 711.773459577386 |
| GYG2    | 69.5000200266713 | 40.7616966228404 | 48.7039705048129 | 41.353786352147  |
|         | 64.7050732790408 | 64.9498081060676 | 80.2680308979464 | 87.2437977005922 |
|         | 58.4016768664589 | 49.0138356310956 | 48.6441988290952 | 54.8325386119165 |
| GYLTL1B | 36.0144420013819 | 51.0175677516029 | 50.6987358483181 |                  |
|         | 36.7892997857376 | 65.8319449883221 | 44.0804700754786 | 60.0981687048269 |
|         | 41.3506832276112 | 53.0357938671646 | 54.6089451252049 | 51.7538628098347 |
|         | 39.6352613956998 |                  |                  |                  |
| GYPA    | 34.1336988442837 | 30.9403229851671 | 35.6139301508335 | 38.5252456306656 |
|         | 32.8704945047196 | 37.2686490268265 | 35.4623691645629 | 31.0594903826598 |
|         | 35.0305278582179 | 34.3674468322242 | 34.064698871541  | 33.4316681623175 |
| GYPB    | 37.0320432433314 | 36.0366673493555 | 33.0260566875355 | 38.9534635879195 |
|         | 39.0564222526273 | 40.1428591998404 | 41.0381860307445 | 39.1652965788406 |
|         | 38.8271346375425 | 34.4875013487777 | 34.9428206949566 | 39.9519547348106 |
| GYPC    | 154.309544187593 | 120.149188463323 | 93.8630393470857 | 414.293172794592 |
|         | 81.588696805606  | 624.097858948785 | 70.4325064623268 | 108.881703882906 |
|         | 50.0822130724389 | 320.684862879691 | 298.771150048863 | 223.562130663956 |
| GYPE    | 42.2598158199183 | 42.1607322031054 | 39.4936330441769 | 42.4162492820012 |
|         | 47.6884372645373 | 43.0860383229288 | 40.7333121467448 | 38.5066108855005 |
|         | 41.7233690251839 | 39.8455060654531 | 41.1418034290776 | 41.2905987859365 |
| GY51    | 102.044838876428 | 110.431464700539 | 105.451996424326 | 106.398825125486 |
|         | 156.433762355183 | 78.3488426553071 | 87.8746766762445 | 69.4677195088043 |
|         | 203.788504042093 | 123.918925337643 | 106.771536005741 | 82.4362183543935 |
| GY52    | 41.0608773166058 | 37.3634897565502 | 37.6557714476853 | 50.378948785456  |
|         | 41.2740822675592 | 39.3841861812262 | 41.1507980856436 | 42.6450179841129 |
|         | 41.2870505273664 | 47.3791873993182 | 41.1638563416981 | 36.3454320848591 |
| GZF1    | 49.6241203903354 | 55.3477556906605 | 59.1040441894478 | 86.7823828209946 |
|         | 48.6224651100733 | 50.8533737532786 | 63.2726414544553 | 45.5581356216957 |
|         | 50.5785738734431 | 51.0055825931636 | 51.9302027391447 | 49.2064066614865 |
| GZMA    | 69.6449298794042 | 56.2851430356168 | 80.6674009289482 | 187.331614826395 |
|         | 41.5668884168669 | 52.8421046802739 | 52.8496345990125 | 68.3372228877569 |
|         | 47.5564423692142 | 57.5713378330876 | 67.8570354010492 | 46.7182294568603 |
| GZMB    | 111.760213205992 | 148.016994658777 | 143.173898886465 | 578.601842980701 |
|         | 49.32293280121   | 71.9329028989527 | 114.230358276599 | 228.907776306695 |
|         | 48.2123120250343 | 61.0935621637178 | 62.5036823572932 | 48.3648494350286 |
| GZMH    | 68.1780382173625 | 46.6996902348633 | 106.443777149496 | 165.820230766206 |
|         | 52.5645416722441 | 49.2050538150106 | 71.8466937395628 | 72.121833189378  |
|         | 41.5635499110307 | 77.775644509079  | 145.193498675059 | 43.4709415392696 |
| GZMK    | 48.7646976789783 | 75.2824161164996 | 102.053879707074 | 246.044674996861 |
|         | 45.6895223823001 | 56.0477607422828 | 39.8695929627783 | 61.6839343510302 |
|         | 42.992884918158  | 62.3233491851723 | 49.5923712603197 | 43.9541718254769 |

|        |                  |                  |                  |                  |
|--------|------------------|------------------|------------------|------------------|
| GZMM   | 42.8036731479932 | 45.4143854024453 | 50.9933795450314 | 59.987045425047  |
|        | 50.3713170502557 | 44.3648993568405 | 48.6395795163502 | 54.720204938924  |
|        | 44.2607789091176 | 47.2299678280724 | 51.6414075056938 | 51.6660481331154 |
| H19    | 676.672146226382 | 10072.2414399735 | 7393.77508374057 | 250.993396750789 |
|        | 248.414210905199 | 5354.58328030315 | 367.685570437603 | 193.981651711507 |
|        | 2892.02001412369 | 2498.54878472152 | 1323.73429724066 | 1718.44944271916 |
| H1F0   | 1835.21901524331 | 928.230419226078 | 793.570993808328 | 444.937258895152 |
|        | 463.022816882856 | 664.453262499828 | 818.290793784784 | 1041.84536202049 |
|        | 1864.63057767867 | 758.462554576949 | 1147.19483787501 | 373.330920144642 |
| H1FNT  | 40.6559419616644 | 43.3458769998118 | 45.310660704531  | 42.4580504587581 |
|        | 48.2748123114598 | 44.5544727111028 | 42.0605906240248 | 41.3506832276112 |
|        | 41.1742244762318 | 41.8613406887824 | 43.1931731665131 | 41.2437378488025 |
| H1FOO  | 41.1523487516364 | 48.2220547806679 | 41.1367478979484 | 41.1886975241176 |
|        | 46.1804647841331 | 39.2985791324641 | 40.2154497375715 | 37.6557714476853 |
|        | 36.6312676076142 | 42.5664883002833 | 39.9899430628542 | 39.9519547348106 |
| H1FX   | 222.05036990665  | 406.500583302121 | 271.138311888031 | 494.300858189605 |
|        | 289.975375372371 | 264.407051461506 | 468.153823329361 | 382.050584680669 |
|        | 382.120608305668 | 430.743220222202 | 504.676944739425 | 181.266908509671 |
| H2AFB1 | 41.0970259989281 | 40.8880530359822 | 45.3675390992851 |                  |
|        | 48.4916117779992 | 41.9397336249742 | 44.4311655729487 | 51.4349390827895 |
|        | 42.357910063876  | 44.5303781239209 | 51.6303029075494 | 47.9942520395434 |
|        | 45.5342598239058 |                  |                  |                  |
| H2AFB2 | 35.0202257459026 | 30.6802399384205 | 36.9795961564828 |                  |
|        | 37.651298468202  | 40.6723334103791 | 40.244271403831  | 37.3799542961839 |
|        | 34.064698871541  | 46.6944238390932 | 37.1275334308172 | 46.0905079010237 |
|        | 40.8681871019812 |                  |                  |                  |
| H2AFB3 | 35.0202257459026 | 37.920964499903  | 38.7745734037492 |                  |
|        | 39.7411455670172 | 36.2048942610546 | 37.1317006162938 | 33.9750800030909 |
|        | 34.2814697823693 | 36.8127605061228 | 44.4652605017595 | 33.8558232866797 |
|        | 40.2669497398702 |                  |                  |                  |
| H2AFJ  | 428.515605971056 | 375.354746298695 | 361.945511835039 | 210.133037772969 |
|        | 384.522115820048 | 201.236491769447 | 558.855313555287 | 397.520960156896 |
|        | 318.609131605258 | 193.395549316561 | 239.590143292142 | 242.673166257518 |
| H2AFV  | 52.0299937917925 | 51.9421032049606 | 43.4709415392696 | 46.614092935749  |
|        | 55.0031529299037 | 57.678188678075  | 48.1747307200218 | 46.5717043290731 |
|        | 51.8824384192988 | 51.1169368198437 | 46.972521499515  | 43.7672102682067 |
| H2AFX  | 77.6056319020116 | 106.595042669127 | 60.5678281953819 | 43.6726153508978 |
|        | 117.893268074013 | 53.565717255469  | 116.555666104916 | 87.8724689898823 |
|        | 112.488156568824 | 42.8936990772838 | 53.6334631215581 | 60.3816817102326 |
| H2AFY  | 752.837247653926 | 650.328627263899 | 615.442484911026 | 970.379875059112 |
|        | 655.389317052689 | 439.376432049616 | 821.922096305069 | 864.302844775203 |
|        | 1041.84536202049 | 461.607803139448 | 492.902027204364 | 746.847753035399 |
| H2AFY2 | 688.168272082335 | 1152.55315876935 | 887.118866402149 |                  |
|        | 269.745248423773 | 895.735191953679 | 409.978564041362 | 1228.1735887278  |
|        | 872.305108096296 | 3190.0108307463  | 654.682263833024 | 731.071171171638 |
|        | 574.467486140819 |                  |                  |                  |
| H2AFZ  | 1291.71781703042 | 2243.24648907474 | 1698.18614771363 | 1351.49940447914 |
|        | 1796.47241860175 | 1693.5377672895  | 3253.86278287661 | 1598.78859278229 |
|        | 2934.35616793443 | 790.094848284547 | 841.850722284484 | 1769.18069954113 |
| H2BFM  | 39.5676051939342 | 43.3458769998118 | 40.4070046183108 | 59.8102324370568 |
|        | 41.1868052124344 | 38.1169703906207 | 50.5252048155459 | 41.5464765641928 |
|        | 40.4220196471124 | 46.7646877499666 | 41.8168470823451 | 48.7814131120945 |
| H2BFWT | 47.5647821785529 | 39.2907645923217 | 34.1806289878747 |                  |
|        | 43.6726153508978 | 41.5668884168669 | 42.357910063876  | 51.4349390827895 |

|        |                  |                  |                  |                  |
|--------|------------------|------------------|------------------|------------------|
|        | 39.2672712041774 | 46.6944238390932 | 35.93950183586   | 38.3684202018524 |
|        | 40.9683275553869 |                  |                  |                  |
| H2BFXP | 41.5421429082231 | 42.9358255168086 | 40.4882741869718 |                  |
|        | 42.2496337895968 | 36.4434672195785 | 41.6590564937735 | 35.4623691645629 |
|        | 42.2577689927563 | 40.4997186069494 | 38.6454098044474 | 37.1059647239814 |
|        | 37.3600014814388 |                  |                  |                  |
| H3F3A  | 4820.70258471362 | 7022.41612496714 | 7785.77078492993 | 8050.256095383   |
|        | 4665.45637589484 | 3681.41904661708 | 8441.71894028273 | 6819.74871209328 |
|        | 5733.54417656207 | 2844.5506310828  | 3361.67247904403 | 3707.73750609316 |
| H3F3B  | 316.185342210304 | 434.841521967958 | 332.230531176052 | 444.937258895152 |
|        | 125.221639689345 | 528.242677613584 | 394.00931573564  | 344.314901683001 |
|        | 412.694325761831 | 645.702744916884 | 518.936896882424 | 451.603052501528 |
| H6PD   | 56.0836516733215 | 51.1541843174981 | 45.6989664108554 | 52.2089306840125 |
|        | 46.3150221024046 | 48.5136862664526 | 42.0605906240248 | 54.2301964914419 |
|        | 46.2718838939055 | 43.2438688757519 | 50.2750065554387 | 54.1941919612524 |
| HAAO   | 44.8914371498528 | 40.2493681589104 | 47.2962360458401 | 50.7046706880325 |
|        | 40.4639532172338 | 52.6226745117396 | 44.7255207589606 | 43.1567024035183 |
|        | 43.2761454096265 | 46.325232414659  | 54.113533179847  | 45.3763275588341 |
| HABP2  | 40.3478825593224 | 46.29198852834   | 37.3687900733549 | 39.3750969348308 |
|        | 45.2556760873335 | 37.0180934800573 | 36.634024014558  | 35.3608605269276 |
|        | 39.3750969348308 | 42.2614524730856 | 40.8225507267584 | 39.0536056496869 |
| HABP4  | 73.9578111605052 | 58.2571968311834 | 58.4137028673494 | 79.1998092110487 |
|        | 65.6556779936059 | 161.38599012777  | 70.0196904419961 | 83.5767232665142 |
|        | 59.1223319112238 | 108.976748006885 | 119.157952832454 | 117.626009607247 |
| HACE1  | 44.7915315085948 | 35.3307157989724 | 38.6727842796202 | 44.265834798964  |
|        | 44.3557408297309 | 46.7800033479223 | 54.1707158323527 | 42.2577689927563 |
|        | 42.6366765186182 | 39.4710743516517 | 44.7114813656401 | 44.1452943804044 |
| HACL1  | 154.730266766226 | 231.733564500645 | 200.615897175992 | 205.605413799808 |
|        | 369.877521477669 | 183.584085676174 | 350.365107642944 | 291.867370164212 |
|        | 238.819980744789 | 203.759116151774 | 144.427680369554 | 170.184914156265 |
| HADH   | 260.766438659762 | 687.862452802453 | 458.230500859847 | 144.116701129933 |
|        | 354.015808474189 | 452.351360652434 | 994.404707955031 | 495.453743436613 |
|        | 1111.89793143647 | 636.367246129079 | 648.380417557148 | 883.06773454117  |
| HADH2  | 112.644426507762 | 113.929486370331 | 119.979854891563 | 131.57403028894  |
|        | 141.410183156424 | 128.923092916744 | 175.632783805966 | 146.892027926888 |
|        | 192.536546957155 | 97.2865629929716 | 97.9497090233081 | 101.017461500409 |
| HADHA  | 158.429106463866 | 125.290426098227 | 122.258194040815 | 165.958820888591 |
|        | 203.417430809331 | 204.251854342995 | 202.325629133577 | 382.872356030213 |
|        | 183.820203505757 | 251.803102904399 | 209.178131628825 | 224.030034866938 |
| HADHB  | 175.876518898179 | 158.806855832703 | 213.232693288132 | 150.941470539313 |
|        | 139.620154641549 | 178.44531401852  | 195.512986297442 | 313.921236120658 |
|        | 203.109765192983 | 144.063191647372 | 164.642060754649 | 240.975885654236 |
| HAGH   | 217.189489936251 | 218.531478946522 | 234.308728996238 | 201.616017553422 |
|        | 187.836567614419 | 251.299662213686 | 219.838542502016 | 129.394893423994 |
|        | 197.13726107504  | 205.830801439839 | 199.480636964499 | 268.072653271299 |
| HAGHL  | 52.1589578279164 | 51.4931742685391 | 51.9214790114499 | 53.593974682612  |
|        | 95.7263252232278 | 44.9896851005259 | 43.8973899364093 | 47.945438269111  |
|        | 51.7356912981073 | 45.087888302889  | 48.7720246202612 | 43.2776458914333 |
| HAL    | 42.0532901689036 | 43.683792219729  | 42.8723769353017 | 56.7106584977089 |
|        | 44.7210190486327 | 47.0027453663546 | 45.6706505553383 | 40.188873541274  |
|        | 43.8482802038826 | 43.5652644712197 | 41.134180463103  | 40.5703581862752 |
| HAMP   | 56.121460370892  | 43.7644428186265 | 81.6486527718661 | 361.57814355509  |
|        | 41.467005949568  | 39.4953494583071 | 58.3675164086197 | 57.9713749600418 |
|        | 44.7058233759912 | 40.1179210534118 | 40.3452320167286 | 39.7411455670172 |

|        |                  |                  |                  |                  |
|--------|------------------|------------------|------------------|------------------|
| HAND1  | 49.3463416794995 | 35.6434124419782 | 39.2707964550441 | 38.0958223740111 |
|        | 37.6527901109005 | 489.983164420779 | 45.1017494688414 | 41.9315419791594 |
|        | 87.7337304906377 | 161.910748720932 | 195.221917652149 | 179.994715581707 |
| HAND2  | 44.380620848621  | 42.5660695551615 | 43.3465699185405 | 41.7144525110048 |
|        | 44.7210190486327 | 73.8651427228332 | 42.5660695551615 | 40.7799172560245 |
|        | 44.2607789091176 | 56.6086202928268 | 53.6895401581575 | 60.0517078759277 |
| HAO1   | 44.380620848621  | 43.3972849968032 | 33.8029161403492 | 42.1622837416589 |
|        | 39.3667161654772 | 39.6251842352088 | 38.7337086062875 | 37.0390589468421 |
|        | 43.3744503319109 | 36.6893251782922 | 39.8184668132023 | 45.0985088502363 |
| HAO2   | 40.7022020432945 | 37.3634897565502 | 43.4544762830742 | 37.7146582037126 |
|        | 38.7864161493321 | 41.0012755104374 | 40.7910160811527 | 37.4484310268909 |
|        | 35.668043946649  | 42.5193208629123 | 39.2542963855807 | 41.6550823405646 |
| HAP1   | 37.8891397738265 | 44.2105195734073 | 39.3344387353654 | 40.3180310664156 |
|        | 45.5311794320092 | 43.9421822132391 | 54.4934782594218 | 40.4359177791566 |
|        | 45.0755084221375 | 42.6793753550854 | 39.6719190054379 | 42.1537476443423 |
| HAPLN1 | 53.593974682612  | 45.7317208802318 | 163.476051754305 |                  |
|        | 38.5252456306656 | 55.6069214673486 | 42.2577689927563 | 39.9519547348106 |
|        | 40.7311497914871 | 43.423558862426  | 40.4518431978241 | 40.723990462047  |
|        | 37.8129870676592 |                  |                  |                  |
| HAPLN2 | 51.0225132036905 | 42.1607322031054 | 44.8872784170036 |                  |
|        | 39.5050383901884 | 40.9950639693255 | 48.3686935595826 | 41.253645578517  |
|        | 47.3791873993182 | 45.0017158586743 | 54.6089451252049 | 48.6767028205398 |
|        | 48.9733758107788 |                  |                  |                  |
| HAPLN3 | 114.288115730578 | 66.8693882433359 | 46.2625470410195 |                  |
|        | 98.2447263268855 | 47.4548471240051 | 63.5738862549306 | 59.6780848951767 |
|        | 64.893664076381  | 69.5741225986433 | 47.2299678280724 | 37.9946685306274 |
|        | 42.2577689927563 |                  |                  |                  |
| HAPLN4 | 50.5670783769975 | 47.6914221838216 | 43.9450023643394 |                  |
|        | 54.4586176399381 | 41.467005949568  | 44.6524308640784 | 46.1634822993009 |
|        | 47.7889447429963 | 47.0804681460898 | 53.4109882045447 | 39.4410515050885 |
|        | 43.5738557773903 |                  |                  |                  |
| HAR1A  | 45.3872406432794 | 45.2556760873335 | 40.931294690669  | 46.4555908533915 |
|        | 42.7107928951766 | 45.7300501624017 | 47.5963750520409 | 44.0390019242862 |
|        | 43.0930293831497 | 42.0621425894624 | 52.2759825608835 | 46.4499258373233 |
| HARBI1 | 47.5647821785529 | 56.5319193881205 | 55.8810837854139 |                  |
|        | 62.1776700757427 | 58.4383854340181 | 53.565717255469  | 50.0088611244948 |
|        | 43.1567024035183 | 54.7966692984192 | 45.0155543555707 | 48.6767028205398 |
|        | 47.2131144508464 |                  |                  |                  |
| HARS   | 437.693269824303 | 260.185079572615 | 351.290929267326 | 356.226114718307 |
|        | 347.003621791919 | 360.962191673108 | 318.069132873489 | 508.688028777582 |
|        | 294.090159716249 | 468.98857415608  | 424.87896140215  | 347.552309199761 |
| HARS2  | 301.025314855652 | 227.895442198856 | 278.303493506139 | 206.28819203182  |
|        | 219.737294408079 | 165.992057520727 | 199.57367025082  | 330.814531248695 |
|        | 253.398345052444 | 354.634819362978 | 323.295794446334 | 318.995164994001 |
| HAS1   | 40.5654775358427 | 34.3715326040967 | 39.2707964550441 | 39.853175885492  |
|        | 40.8873907150245 | 89.8567957512307 | 40.4359177791566 | 42.357910063876  |
|        | 35.0305278582179 | 44.8997235283254 | 35.9563099719284 | 43.5738557773903 |
| HAS2   | 45.4614234442527 | 45.7317208802318 | 42.0136658108872 | 46.8249967544573 |
|        | 48.7847528954724 | 62.5177123761087 | 41.3094485574845 | 45.4216391637116 |
|        | 61.6183748238619 | 49.9085372049438 | 44.5818127765109 | 49.1718303518849 |
| HAS3   | 58.8224410806741 | 604.357590751951 | 597.191426276771 | 48.665578118898  |
|        | 235.222472959869 | 64.5187138759372 | 225.618853905635 | 262.824698774297 |
|        | 873.451893437179 | 309.802432824498 | 224.976641879383 | 515.409979010663 |



|        |                  |                  |                  |                  |
|--------|------------------|------------------|------------------|------------------|
| HAT1   | 80.7067505750848 | 76.889690218685  | 74.0913177754682 | 93.3216420803293 |
|        | 80.3500323413132 | 81.8426140611297 | 80.0733119200914 | 83.9236799134394 |
|        | 73.1215732923523 | 69.6511571901941 | 66.0282565447846 | 83.4033736999037 |
| HAVCR2 | 397.108901822735 | 179.241252961119 | 184.964039515715 |                  |
|        | 1533.38581753491 | 102.913039837094 | 190.81617208799  | 171.073367662623 |
|        | 303.323289734056 | 62.275808835675  | 86.7076796107636 | 89.9227845135785 |
|        | 142.012216533823 |                  |                  |                  |
| HAX1   | 95.096268847843  | 79.909124697198  | 110.181320436731 | 135.323750661937 |
|        | 106.276392548097 | 114.243522751687 | 104.650071846586 | 193.196385709124 |
|        | 105.598516887691 | 108.213380368446 | 100.83436298853  | 115.761674855716 |
| HBA2   | 1839.09068171097 | 2456.86796652313 | 2598.78910128081 | 11410.3307451176 |
|        | 1081.97502255142 | 9582.11974031559 | 10072.2414399735 | 664.178866783226 |
|        | 503.793770799548 | 10996.2779403491 | 10996.2779403491 | 1640.74027400791 |
| HBB    | 1585.90718459092 | 1801.44003951248 | 1762.93413846062 | 11176.402230735  |
|        | 1539.35554229258 | 7168.83136860899 | 10483.5643876539 | 516.704027135707 |
|        | 504.676944739425 | 12125.3293116195 | 8703.02873382565 | 1806.22468459769 |
| HBBP1  | 40.2543341073001 | 43.0971787292711 | 46.4569566520107 | 45.7397504535169 |
|        | 38.1644569189523 | 42.157627240486  | 44.4639405506967 | 44.4031868028216 |
|        | 44.0519245668737 | 43.2988017098387 | 42.170702295259  | 40.1700117452801 |
| HBD    | 41.6354649482853 | 41.8073910693411 | 41.528370959196  | 47.3574589211166 |
|        | 39.2608760193011 | 43.1826328292558 | 37.7136011474903 | 37.4484310268909 |
|        | 37.9273653326866 | 60.4837400912239 | 46.0095710163378 | 36.449101775775  |
| HBE1   | 42.2455707947223 | 35.4484652445078 | 35.0970060242246 | 41.8778873678551 |
|        | 46.4343327861696 | 38.3418933808844 | 40.9157352260901 | 51.4360013601805 |
|        | 48.4869909888679 | 41.5435611403119 | 38.1835938174625 | 36.8690774823319 |
| HBEGF  | 163.43197105141  | 355.351648424266 | 157.020685801527 | 1545.76489731307 |
|        | 138.728648830528 | 403.92758879201  | 201.360008430353 | 469.30167430316  |
|        | 109.828760284519 | 66.274247400793  | 86.7730065232892 | 94.1128427766432 |
| HBG1   | 33.9561816279577 | 43.0971787292711 | 42.7303139017786 | 51.3851157261451 |
|        | 40.4639532172338 | 63.1091746640396 | 38.5066108855005 | 40.3357777530419 |
|        | 45.2897806651929 | 131.083141370546 | 49.3901004211918 | 41.863927676552  |
| HBG2   | 46.263826584899  | 47.6914221838216 | 48.6037684272115 | 48.856176220627  |
|        | 52.0583273941813 | 86.2563919366781 | 48.4859552186772 | 44.797320243931  |
|        | 44.0519245668737 | 165.992057520727 | 48.9754340235127 | 39.7411455670172 |
| HBM    | 40.7609952437622 | 35.0222940937513 | 40.1985790927248 | 46.8954576545929 |
|        | 51.7983110178095 | 43.4681646416585 | 47.1345949868029 | 43.1567024035183 |
|        | 43.8482802038826 | 58.8022152133979 | 50.7903824729818 | 43.1805016690297 |
| HBP1   | 180.475056805817 | 153.279284223069 | 155.908644253547 | 291.94914449218  |
|        | 132.555169949054 | 249.729778471447 | 130.585540374294 | 145.232878862479 |
|        | 173.11353027932  | 195.635797217403 | 191.284436365696 | 164.262531918679 |
| HBQ1   | 42.2455707947223 | 45.3486182278177 | 36.4564050256915 | 43.3078542962968 |
|        | 91.2681347227088 | 41.159706131351  | 41.9393838138203 | 45.4757965005055 |
|        | 39.6609238036815 | 44.6918600441328 | 45.0589947942306 | 37.2810767789306 |
| HBS1L  | 40.8681871019812 | 40.8476436931481 | 39.5118967430322 | 45.1151758109609 |
|        | 39.512606833112  | 43.6427759607073 | 43.4544762830742 | 43.4885245598939 |
|        | 45.1569741609597 | 41.0608773166058 | 43.9450023643394 | 40.6614700944853 |
| HBXIP  | 704.601607617837 | 539.188951045594 | 647.868022835702 | 684.865133028228 |
|        | 477.558242266308 | 456.467726693355 | 677.481235695517 | 675.079525434102 |
|        | 1188.3486464341  | 415.477167615547 | 428.958127252533 | 810.382224368065 |
| HBZ    | 39.3709357615493 | 39.1982470626863 | 39.9101908547397 | 47.481302504066  |
|        | 45.2556760873335 | 42.4580504587581 | 37.0564573649223 | 37.33030683349   |
|        | 38.6322728994674 | 42.3606390470387 | 40.9157352260901 | 44.0451487108213 |

|         |                  |                  |                  |                  |
|---------|------------------|------------------|------------------|------------------|
| HCCA2   | 119.714551585774 | 118.143444770806 | 116.949813289388 | 139.385367339095 |
|         | 97.5394336319916 | 228.571334092678 | 118.736188485344 | 109.649431670339 |
|         | 145.267770598988 | 227.404530886674 | 216.45007990575  | 128.230543301378 |
| HCCS    | 73.6855877240541 | 79.856662992182  | 67.9850517608624 | 72.0112676564347 |
|         | 70.506090074243  | 92.2772139468085 | 78.6402083787251 | 71.5484567134601 |
|         | 88.9321928608078 | 62.9604757922393 | 62.9886614153696 | 82.7083356310191 |
| HCFC1   | 424.182335137838 | 759.94822128584  | 510.379313524019 | 352.997455210484 |
|         | 982.428740433235 | 471.874412428677 | 602.726022292973 | 568.638529128128 |
|         | 661.269882993465 | 440.421077161585 | 506.585006700107 | 473.688869614777 |
| HCFC1R1 | 615.011590811277 | 261.023196824723 | 355.67721196018  |                  |
|         | 394.764369100963 | 247.298165265093 | 547.072513229674 | 297.990925644625 |
|         | 198.010793115588 | 271.900886756161 | 811.142611128461 | 518.527535205975 |
|         | 367.158502379417 |                  |                  |                  |
| HCFC2   | 44.8914371498528 | 46.1569135229922 | 49.7350276169552 | 52.1201052574162 |
|         | 51.3511088648386 | 54.8265655909623 | 44.4639405506967 | 52.5909491535773 |
|         | 58.5561424827901 | 50.22432299342   | 53.7475011049549 | 50.7487159427973 |
| HCG18   | 44.9896851005259 | 53.0383634135393 | 44.5134109184888 | 43.4410741327254 |
|         | 65.0605897122361 | 41.6590564937735 | 46.7100796279384 | 46.8954576545929 |
|         | 49.9162522057712 | 42.3606390470387 | 46.0095710163378 | 40.7704587752083 |
| HCG22   | 42.3433931248155 | 43.0227387991135 | 49.3000844711116 | 42.5664883002833 |
|         | 41.8806343997257 | 47.9503724044453 | 46.7100796279384 | 45.3872406432794 |
|         | 44.0519245668737 | 48.2596564318071 | 36.5359455830388 | 43.3744503319109 |
| HCG27   | 39.0620487644635 | 47.1332119496722 | 49.2041300973417 | 66.5921967967793 |
|         | 45.6895223823001 | 50.7516773099639 | 47.2927436772465 | 47.5950227477807 |
|         | 54.113533179847  | 53.0357938671646 | 44.1148826235374 | 37.1747156131306 |
| HCG2P7  | 1457.72260892651 | 707.4124863603   | 848.079114196986 |                  |
|         | 1025.7433359938  | 494.733185937057 | 572.968592371501 | 1243.32650314893 |
|         | 1824.79010714035 | 769.685677484067 | 1621.89443989657 | 1731.19220270448 |
|         | 1117.26060212107 |                  |                  |                  |
| HCG3    | 40.8681871019812 | 40.716553247236  | 33.4240466670776 | 38.9534635879195 |
|         | 39.6535880152834 | 37.0180934800573 | 37.6036146841933 | 37.7612949798895 |
|         | 39.2809305246091 | 39.3698811593364 | 41.0808257270221 | 40.0557788909923 |
| HCG4    | 468.381233506231 | 999.862452730252 | 602.047768767953 | 884.036280777358 |
|         | 219.737294408079 | 203.497070457832 | 545.827286197333 | 188.567635000971 |
|         | 377.573838771285 | 101.681822254799 | 202.529846569324 | 114.520410790135 |
| HCG4P6  | 45.3872406432794 | 41.0678614026819 | 44.0451487108213 |                  |
|         | 43.8002456102021 | 44.2607789091176 | 39.4953494583071 | 50.0088611244948 |
|         | 38.956280281655  | 39.4762546236449 | 45.7911932481722 | 37.2018803984555 |
|         | 40.9683275553869 |                  |                  |                  |
| HCG9    | 39.6609238036815 | 39.3999056968598 | 41.3366779545815 | 40.8681871019812 |
|         | 38.8456942580061 | 48.260931742163  | 40.4359177791566 | 36.8400213077707 |
|         | 42.2577689927563 | 43.844855336215  | 40.0766543123257 | 40.4639532172338 |
| HCK     | 94.9365530062692 | 91.8568043052819 | 79.3066495980045 | 953.629734158221 |
|         | 65.3019328668633 | 195.740109330843 | 170.150808455621 | 78.0020909283414 |
|         | 56.6079099547057 | 49.7259371799014 | 50.2203578628217 | 74.3442318693865 |
| HCLS1   | 266.129007472128 | 412.694325761831 | 794.806085783439 | 2435.70120719503 |
|         | 270.202959012185 | 669.19065220034  | 366.129480083279 | 252.616382150668 |
|         | 67.8208976798364 | 315.186937216422 | 232.019748665806 | 238.647490689325 |
| HCN1    | 36.2496364442264 | 33.8237407699472 | 45.063792968927  | 32.9046688061235 |
|         | 42.7982502551634 | 40.5281496800812 | 39.6535880152834 | 39.4710743516517 |
|         | 40.9901805728485 | 39.6719190054379 | 43.9450023643394 | 36.064718696392  |
| HCN2    | 41.0970259989281 | 36.6002100641539 | 36.0306975524309 | 43.8002456102021 |
|         | 40.0599807618105 | 41.4508241771315 | 42.8684958525042 | 40.6723334103791 |
|         | 41.2870505273664 | 43.6033221838149 | 38.1253290586431 | 41.9741368971524 |

|        |                  |                  |                  |                  |
|--------|------------------|------------------|------------------|------------------|
| HCN3   | 73.0970339739187 | 68.4278345554565 | 135.323750661937 | 46.1673159982664 |
|        | 92.8644908993284 | 48.4758590019384 | 84.0691608193405 | 69.7729022157455 |
|        | 82.6157566292355 | 86.2118355769367 | 61.0094935318105 | 77.1954301283261 |
| HCN4   | 47.8249696958403 | 47.6229101519945 | 45.2313723727673 | 42.357910063876  |
|        | 47.0954207417646 | 41.554942319225  | 48.0283573444179 | 44.1311654985682 |
|        | 48.2123120250343 | 51.6778366958973 | 44.7926323492519 | 51.6660481331154 |
| HCP5   | 396.355023788839 | 1129.71973548345 | 684.238999553691 | 648.885062676884 |
|        | 161.890859629246 | 131.126942328593 | 600.007191467065 | 347.145902252055 |
|        | 421.146145642412 | 222.8744321245   | 1017.1803754111  | 202.708232693973 |
| HCRT   | 44.8914371498528 | 46.3635803515159 | 45.1569741609597 | 54.6089451252049 |
|        | 46.7508829977587 | 47.0940613507321 | 48.6395795163502 | 45.1714698794331 |
|        | 48.5792058061372 | 56.057906531592  | 47.9942520395434 | 49.6629259325705 |
| HCRTR1 | 35.6111578834671 | 38.5252456306656 | 39.991353369336  |                  |
|        | 44.1483976313959 | 44.147557390293  | 43.8582747295766 | 51.7714254834195 |
|        | 41.6466169548846 | 39.7537274655115 | 41.5435611403119 | 39.4410515050885 |
|        | 45.5800840647989 |                  |                  |                  |
| HCRTR2 | 41.3387790895716 | 44.5152708955623 | 45.3974838013476 |                  |
|        | 40.1804147506786 | 46.0043807840705 | 40.8634043028528 | 44.9863726205428 |
|        | 45.642304356051  | 47.9035532886869 | 46.7646877499666 | 40.6373400186325 |
|        | 46.8129509799753 |                  |                  |                  |
| HCST   | 208.804071011518 | 212.250918463598 | 190.214361156876 | 1359.9708539999  |
|        | 89.4111455826308 | 548.047774435177 | 180.502282381416 | 153.165464817911 |
|        | 65.0423160790157 | 116.67447696188  | 187.439021508049 | 103.133138547093 |
| HDAC1  | 782.28158356937  | 1529.52516575545 | 1333.01876209753 | 715.662312404643 |
|        | 2133.78836857697 | 737.604036996153 | 2196.59044510709 | 1425.37639004849 |
|        | 1896.06380611235 | 1529.52516575545 | 1354.50256889331 | 1301.07436212673 |
| HDAC10 | 56.8168526942685 | 73.6855877240541 | 62.0008474085033 |                  |
|        | 53.2046867327331 | 62.6860949544223 | 45.1873487463472 | 63.0119737420787 |
|        | 49.5185112777773 | 58.7382738968248 | 59.9354531144375 | 57.8991270166934 |
|        | 55.9555622193202 |                  |                  |                  |
| HDAC11 | 61.6544855697851 | 62.801431502597  | 40.4882741869718 |                  |
|        | 40.0698728584484 | 46.0977687311222 | 44.8872784170036 | 42.7431359850339 |
|        | 64.5257016285499 | 46.1101825640108 | 54.1683282066029 | 47.0940613507321 |
|        | 54.5921287593554 |                  |                  |                  |
| HDAC2  | 563.065549077627 | 735.60603239712  | 415.477167615547 | 302.79352975792  |
|        | 294.7772562683   | 319.871452890512 | 740.423874031773 | 1848.50311456636 |
|        | 421.146145642412 | 343.346644539158 | 345.529757315326 | 517.869378941762 |
| HDAC3  | 189.890451486324 | 177.067668324062 | 271.334774589829 | 173.925818790068 |
|        | 215.907790093087 | 176.670909065664 | 193.782527748199 | 187.923050034941 |
|        | 247.356027979377 | 269.745248423773 | 190.187931547806 | 202.957014793417 |
| HDAC4  | 69.7442393277127 | 63.1780854659428 | 49.3000844711116 | 80.1809075683154 |
|        | 42.3685136297603 | 164.847648206552 | 43.3262148375525 | 57.7805922926828 |
|        | 48.5792058061372 | 84.1639779987105 | 88.9538366702651 | 79.9447969637409 |
| HDAC5  | 42.3433931248155 | 43.3016395799961 | 40.7620472083159 | 41.9620007529243 |
|        | 38.3561682218911 | 49.7149784386993 | 41.3094485574845 | 50.7364620410977 |
|        | 40.6503965580437 | 50.5252048155459 | 48.6494451061637 | 51.3244198342335 |
| HDAC6  | 140.226992517573 | 74.4696354388511 | 105.515662220161 | 113.979504140326 |
|        | 84.5572894783679 | 93.9228336493696 | 128.766242896259 | 117.723425661764 |
|        | 89.0203733091224 | 181.983177572371 | 127.986477405999 | 109.492219458129 |
| HDAC7A | 48.7646976789783 | 55.1359824959234 | 49.8899020044306 |                  |
|        | 44.0451487108213 | 52.3242437351389 | 45.6706505553383 | 39.8695929627783 |
|        | 51.4360013601805 | 48.0436466478804 | 56.4917096880521 | 50.7903824729818 |
|        | 51.973762640055  |                  |                  |                  |

|         |                  |                  |                  |                  |
|---------|------------------|------------------|------------------|------------------|
| HDAC8   | 74.7955767483841 | 53.2046867327331 | 64.1080166181228 | 43.8002456102021 |
|         | 58.6481644777552 | 49.7458652239071 | 61.8571521441451 | 80.4577725550904 |
|         | 68.5599263000733 | 65.5349012839562 | 73.845912534353  | 72.4651758215622 |
| HDAC9   | 39.4987030972173 | 38.1725197931105 | 41.3743834747446 | 41.1418034290776 |
|         | 38.8043560812482 | 38.5808034535515 | 42.2099119257029 | 39.0048202613914 |
|         | 39.0481003400271 | 42.11120345157   | 42.5856588364738 | 41.2001840592033 |
| HDC     | 72.9154861179393 | 74.4696354388511 | 64.2404293863468 | 78.7450149191851 |
|         | 33.2552842693684 | 533.468347491982 | 40.3302268293707 | 68.0342444360948 |
|         | 39.7537274655115 | 80.7338782543351 | 69.6097529955737 | 52.6922486991742 |
| HDDC2   | 778.723771259404 | 572.81778857651  | 528.512401493184 | 516.992846073349 |
|         | 347.486523804413 | 766.027617496754 | 558.451033789799 | 524.451156145427 |
|         | 401.347734852083 | 695.255317861845 | 558.855313555287 | 591.192020333181 |
| HDDC3   | 130.058147569795 | 161.326580647514 | 101.403739410832 | 125.801834682035 |
|         | 154.111066539468 | 96.3976093220249 | 255.126812649967 | 176.057220407246 |
|         | 165.662539866309 | 139.645717741863 | 115.676508349703 | 147.689479458785 |
| HDGF    | 701.551782736435 | 521.874349042344 | 505.294880430281 | 324.506136847875 |
|         | 703.315796616275 | 267.261896105785 | 625.435083064752 | 496.163796158189 |
|         | 436.497820504526 | 341.666968456707 | 314.006301513986 | 355.92328557644  |
| HDGF2   | 126.981964766008 | 124.112216491975 | 130.615540145155 | 116.76301232629  |
|         | 196.034087004464 | 171.058650956601 | 193.01447006167  | 124.605379715077 |
|         | 156.276838862671 | 141.784776736918 | 133.594952879573 | 109.525921548011 |
| HDGFL1  | 40.3478825593224 | 38.0226905622357 | 40.301483914446  |                  |
|         | 43.9744941494111 | 40.9950639693255 | 46.1974343793412 | 43.2721716572958 |
|         | 40.7799172560245 | 41.8197029429821 | 40.2112371512838 | 40.5824352835642 |
|         | 41.6550823405646 |                  |                  |                  |
| HDGFRP3 | 50.379587451669  | 84.2484477706194 | 54.6820069269589 |                  |
|         | 47.6687908290818 | 46.0977687311222 | 105.945216149549 | 93.5928272702304 |
|         | 92.4953883194488 | 72.3095457386378 | 79.4158467034017 | 91.983638239817  |
|         | 117.934830767297 |                  |                  |                  |
| HDHD1A  | 125.540457221408 | 96.8240908274121 | 161.326580647514 |                  |
|         | 86.0630164348952 | 119.572497267498 | 80.5478617156852 | 95.0190813062982 |
|         | 97.4421930425128 | 156.79660458088  | 126.670728021682 | 105.589475270494 |
|         | 134.489077146096 |                  |                  |                  |
| HDHD2   | 67.6767845246581 | 64.643220133046  | 66.737740728688  | 64.3746985855249 |
|         | 58.7460488758053 | 73.5743059777365 | 56.9320717885002 | 95.491982090349  |
|         | 75.2337946941103 | 104.288073521816 | 98.6706537801886 | 113.277043026153 |
| HDHD3   | 140.369714831352 | 80.257554904218  | 68.4720753153522 | 53.8086134112366 |
|         | 82.6157566292355 | 71.2787833369055 | 99.5844079573552 | 72.121833189378  |
|         | 99.5192591352063 | 102.294142438313 | 117.8523906126   | 85.1114448808779 |
| HDLBP   | 48.1125722136997 | 47.4630625313159 | 50.6486940895674 | 50.2950101030503 |
|         | 50.1092226717582 | 50.7516773099639 | 40.7451277736087 | 45.9090659324223 |
|         | 50.4463723277824 | 44.7958122466628 | 47.0110068985119 | 46.0201052072883 |
| HDX     | 42.9104454767916 | 49.0697565324841 | 41.0356368374708 | 45.4634652319753 |
|         | 36.08956004634   | 43.9724628401189 | 40.4359177791566 | 43.4544762830742 |
|         | 48.5792058061372 | 42.785429206422  | 43.1931731665131 | 47.3992733452821 |
| HEATR1  | 150.362006499825 | 193.196385709124 | 293.410413883219 |                  |
|         | 148.529482776555 | 521.874349042344 | 177.27613997459  | 230.787791652978 |
|         | 268.047342640491 | 202.459251553516 | 134.936657884035 | 158.901175732866 |
|         | 157.518879763075 |                  |                  |                  |
| HEATR2  | 83.6524523974491 | 106.691530592115 | 101.2615980834   |                  |
|         | 72.4834467838798 | 197.205643078662 | 97.7415824971555 | 120.327382682483 |
|         | 90.716460692818  | 127.547251770359 | 67.7189686993694 | 78.9088042058577 |
|         | 86.1433529921684 |                  |                  |                  |

HEATR3 88.7928773498158 77.775644509079 74.4508307047509  
 111.522812019895 72.2016884438365 57.3171834644877 80.7563265626648  
 66.7530718914083 83.6395145977203 64.0624077013652 69.8314582428552  
 69.6449298794042  
 HEATR4 49.7188990489616 35.3307157989724 43.0971787292711  
 37.4223289687135 42.7107928951766 42.0574848021044 46.7100796279384  
 44.4031868028216 41.3803269429468 37.2089297656361 37.2018803984555  
 36.449101775775  
 HEATR5B 113.026772174726 145.027715477051 168.11088055793  
 131.347995391441 99.7668527666705 127.634504077212 143.251956814524  
 155.693953208351 119.747995520476 142.515628954457 243.489225650886  
 156.770274308736  
 HEATR6 67.2437599548936 75.5775406974686 69.1938570643524  
 65.8926843080114 93.6591201235745 67.4846787600629 87.6018870099686  
 79.7170181855209 77.9028721785469 70.7805103907761 82.6602736441839  
 67.3183506012892  
 HEBP1 251.268123356533 242.673166257518 239.569514501529 221.743315748689  
 160.203825526096 311.432395849636 264.116434279258 234.043251639296  
 272.475108279834 337.156068385541 288.923207993626 345.294930735691  
 HEBP2 605.145228948011 900.517711546397 569.511773053233 268.936151471133  
 288.869882644391 447.248719481853 736.846933148564 468.573956652904  
 435.094968715663 385.827237353675 483.882804472844 470.231929311877  
 HECA 98.9463403584348 62.8885806455128 67.3469281984384 91.0346886951891  
 66.0411740221276 62.7515429046888 71.8466937395628 72.3822545261582  
 78.8968326770219 92.6888475289584 76.7063975550116 100.049462976601  
 HECTD1 513.57613902662 877.673009984357 1012.0373748933  
 587.060466667911 685.386956092142 629.301646370726 406.500583302121  
 515.856807472321 846.773659307087 798.033975337132 787.951838387453  
 787.671342652389  
 HECTD2 42.0847226073592 45.1486243270611 42.3536549114165  
 41.3027031037343 48.4670130605028 53.1457020450516 43.2776458914333  
 51.402003176055 42.6366765186182 40.7063426028871 52.8190882379316  
 47.6040671292013  
 HECTD3 186.301404367238 131.112230954034 246.274692971423  
 121.737071786167 152.456314990408 111.760213205992 161.573327074375  
 235.315897087189 166.983092667334 191.926072400139 153.436974478757  
 123.114162330406  
 HECW1 34.4896350146096 35.5310164682026 32.821392987958 35.0448343468967  
 35.0181575202066 32.6368705146258 31.9682164860619 41.5464765641928  
 34.7722083264266 39.5637454855233 32.2133093774284 40.2669497398702  
 HECW2 91.8733417805775 58.7111274254142 82.051509943308 106.398825125486  
 66.4047895961325 51.3886035574416 48.6395795163502 67.5206810636627  
 42.8036731479932 45.4614234442527 55.1099824417989 43.2776458914333  
 HEG1 110.729504563799 71.8576824255215 105.376705821141 134.952392466784  
 67.6011992144113 116.51037006692 52.0942589368478 68.2309359831273  
 52.5772854102326 76.826527950236 77.9085946827079 83.1874704625702  
 HEL308 75.1701698483856 66.1863819168127 60.6567691532561  
 80.1809075683154 64.9072331703985 75.353039684456 58.7585623394335  
 54.8412943008635 58.3564461855595 75.9037617394486 73.6362523983338  
 72.7502212566295  
 HELB 49.2595762436995 53.9275079525238 46.9040704638073 80.7168944828052  
 43.1252272136667 50.8533737532786 60.5125774827425 46.3685439301234  
 43.3744503319109 39.3698811593364 43.9450023643394 45.7562276914441

|          |                  |                  |                  |                  |
|----------|------------------|------------------|------------------|------------------|
| HELLS    | 47.1216490839161 | 60.6548851977964 | 46.1987217359283 | 49.4742925789913 |
|          | 62.9553576299033 | 41.6178506967511 | 86.3237770387663 | 57.7125861123012 |
|          | 65.0810479794187 | 46.441301934328  | 44.9713479185144 | 44.4475838947656 |
| HELT     | 42.442231667357  | 39.3999056968598 | 35.9305494063137 | 43.074472921841  |
|          | 41.8806343997257 | 41.8613406887824 | 42.357910063876  | 40.5158867964016 |
|          | 41.074824727477  | 38.528621456378  | 39.0550139257658 | 39.5418280570561 |
| HELZ     | 147.65688475427  | 166.208731611481 | 141.784776736918 | 186.195424728755 |
|          | 160.973602503707 | 202.529846569324 | 250.276530863694 | 177.111143479957 |
|          | 235.101442092497 | 353.598144765197 | 389.686780706341 | 236.407697413249 |
| HEMGN    | 42.7150227340364 | 41.6799375298398 | 39.050952280947  | 40.4893720023062 |
|          | 40.5710637884029 | 39.6595129100865 | 38.3389087628055 | 41.0381860307445 |
|          | 40.9901805728485 | 40.8970401536578 | 38.4304896304026 | 40.5281496800812 |
| HEMK1    | 54.6235981131919 | 75.9802606133139 | 69.11736279512   | 60.3481762331447 |
|          | 71.5345397102823 | 52.5330333302271 | 61.8571521441451 | 55.1933004802607 |
|          | 55.9423752286714 | 79.6133633483649 | 65.485076402841  | 64.863894209343  |
| HEPACAM  | 38.7537364570873 | 40.3384318592985 | 44.825830634601  |                  |
|          | 43.2504382247503 | 40.0145811166794 | 49.641159251878  | 44.4045701012801 |
|          | 40.8833572570383 | 42.2248608921879 | 40.2493681589104 | 36.9768361759916 |
|          | 36.1190722948669 |                  |                  |                  |
| HEPACAM2 | 40.6994262313917 | 42.2013327019987 | 39.1553169409075 |                  |
|          | 39.9182914210537 | 42.4864576619427 | 43.9421822132391 | 43.5898425390297 |
|          | 38.5073031329596 | 38.8507804383261 | 39.8873706855774 | 44.8872784170036 |
|          | 48.6795178347248 |                  |                  |                  |
| HEPH     | 111.803238196297 | 39.4629815741023 | 45.7452456977857 | 50.3127977239083 |
|          | 37.3508690072156 | 71.0369238830779 | 41.4369824439795 | 46.2779564481158 |
|          | 37.241386734757  | 64.5845827915699 | 53.73245713018   | 50.6895263967098 |
| HERC1    | 168.91210897306  | 148.544012961815 | 132.760054781304 | 242.282363793567 |
|          | 146.701131209299 | 260.656475394736 | 182.079641528208 | 241.557912972813 |
|          | 139.712472369259 | 207.957319374194 | 232.113067048781 | 197.103673938152 |
| HERC2    | 156.844010597219 | 144.633447485038 | 114.533239859288 | 138.895316905243 |
|          | 168.883366756191 | 151.088035451997 | 203.53267380432  | 152.555556133364 |
|          | 157.7623351008   | 150.829277770546 | 153.364107550338 | 146.287473652123 |
| HERC2P2  | 43.4079968811658 | 43.5627649099623 | 45.5533570914817 |                  |
|          | 42.1725002904014 | 45.5001421579961 | 42.297291190584  | 43.6084517252627 |
|          | 46.2306893704071 | 44.6569942625774 | 42.8297772945791 | 43.6294818685075 |
|          | 44.0451487108213 |                  |                  |                  |
| HERC2P4  | 44.3355304829989 | 37.4540772310118 | 38.6727842796202 |                  |
|          | 40.1804147506786 | 38.1644569189523 | 38.4330755397458 | 41.8799523546812 |
|          | 45.642304356051  | 37.6630259432398 | 43.3465699185405 | 38.9240290061433 |
|          | 38.745552403895  |                  |                  |                  |
| HERC3    | 64.3502363726659 | 75.0873720488265 | 69.5937318502259 | 61.0845101400379 |
|          | 64.193536444915  | 83.0554837248934 | 43.4544762830742 | 51.8347877274018 |
|          | 74.7934385405346 | 61.0935621637178 | 61.940656536312  | 77.3260618801358 |
| HERC4    | 98.3126451737573 | 87.4273245333478 | 98.7535408247698 | 97.0055689383756 |
|          | 79.3539393480885 | 84.1254258487497 | 66.3209349903185 | 90.8109585999257 |
|          | 211.019451518444 | 94.0777119695783 | 88.715256326632  | 109.979856686854 |
| HERC5    | 124.599352191013 | 144.412165495719 | 104.950400251642 | 421.791344753995 |
|          | 76.6914642534934 | 193.875712862166 | 239.838643553139 | 267.70610731202  |
|          | 103.349712762251 | 211.421222959783 | 207.087723777954 | 145.572606290643 |
| HERC6    | 111.304424389891 | 222.453547273598 | 238.584514797019 | 138.053682842992 |
|          | 52.8190882379316 | 134.375403847987 | 101.716697533604 | 163.917208464731 |
|          | 160.605530211736 | 134.869029698594 | 127.49459343016  | 63.1443731864055 |
| HERPUD1  | 301.594300620246 | 482.5816387921   | 611.776512504215 |                  |
|          | 1173.47285626656 | 342.643344197936 | 346.285308869994 | 252.649651285136 |

209.497482517298 456.992521713593 285.322305931794 282.961489041903  
 290.546420262364  
 HERPUD2 74.9491421278749 85.8087881787018 101.131391476546  
 119.502912878938 82.3181867658154 102.899135663993 83.7829283976292  
 61.3077641493507 92.7427427543974 63.2684764441521 66.0664586519214  
 71.4518820434918  
 HERV-FRD 43.0930293831497 46.4861258030402 42.4580504587581  
 64.3746985855249 44.5668141895992 60.5803031036931 54.339958888486  
 45.8669209716694 53.0357938671646 52.2256177934134 43.7585538437696  
 44.5432192783161  
 HES1 129.938114164087 487.065758294354 305.786520619504 72.89602312859  
 168.75362473684 85.6038071277319 427.281740164881 289.909646207746  
 393.001025840896 479.696469083953 475.310458821086 480.13416648493  
 HES2 91.2647023876304 47.1856919329105 49.5424425850549 46.0228732507872  
 41.1507980856436 39.8785903668981 42.7065584433947 49.2901038327894  
 45.7206695113999 41.3641352453779 39.2542963855807 40.1700117452801  
 HES3 41.7397731376692 44.2630383225933 43.3085358214154 42.2496337895968  
 43.9450023643394 48.3686935595826 42.1607322031054 44.7044140979108  
 42.4540072551568 40.1179210534118 40.2649309204478 43.1805016690297  
 HES4 552.162906190653 1792.42490815074 468.153823329361 617.091932961591  
 1282.9181829891 375.036941898486 1405.20888023653 908.328776521114  
 583.690350347288 1174.92419086759 1161.71671016964 922.047328788961  
 HES5 45.3872406432794 116.967446594767 169.874602999057 37.4223289687135  
 60.4122350478242 41.0582900711341 38.2933870238743 42.4580504587581  
 48.0163377492228 62.1035858593388 77.622501706827 47.5025821041537  
 HES6 143.6667863386 102.760704801607 66.288032400574 56.4578213622965  
 83.1614238528477 78.3488426553071 143.6667863386 180.679129876248  
 109.241121384212 57.3562426592112 51.0492389286271 61.9882398986333  
 HES7 34.4896350146096 34.0382693188794 37.2838080935695 34.1051821768421  
 40.5710637884029 39.6251842352088 34.9344532055397 34.806104801006  
 35.4332080966594 33.2987269789328 36.0481934423077 33.8196020406676  
 HESX1 37.2474303302343 46.1569135229922 38.9790184198145 46.0228732507872  
 51.5888395924843 46.3715909653832 50.8388984085636 43.2551508830106  
 43.6670755115848 40.8970401536578 40.3452320167286 41.2437378488025  
 HEXA 55.5276281380084 45.5842286511645 49.2041300973417 51.5913529948887  
 51.4527545197672 46.7800033479223 42.4939802311136 48.4670130605028  
 51.2066664465185 51.9547984751408 47.3791873993182 42.357910063876  
 HEXB 1604.80031304031 1228.1735887278 1465.08435775014 3681.41904661708  
 1310.03307063841 1626.71747158994 614.603743904512 1117.26060212107  
 1014.6400720037 1164.71243740122 1071.64675274806 1171.207937488  
 HEXDC 43.6706764143908 47.6914221838216 48.7039705048129 37.29566077996  
 45.2556760873335 43.2805590023412 40.9157352260901 46.4672637826582  
 51.5229124652769 45.4614234442527 52.6960621424156 47.7962548556026  
 HEXIM1 42.3433931248155 45.3486182278177 45.1569741609597  
 42.1273928203021 45.1137938810047 46.7800033479223 39.2533668167483  
 46.4672637826582 41.4636047919453 47.4767851750188 47.2134341420411  
 46.5650556481721  
 HEXIM2 80.8943070653517 56.0477607422828 82.1344514651393  
 44.1483976313959 47.6884372645373 52.5330333302271 56.4809146784765  
 52.5909491535773 80.3805507705979 69.9928775398776 61.6084234634424  
 46.0633179231318  
 HEY1 159.204751627727 122.758873982957 96.6294773538052 78.4289643729837  
 86.7823828209946 64.2512089157122 82.0174591986046 52.7247447185469  
 113.929486370331 362.506098778318 111.558107942386 255.598083334598

|        |                  |                  |                  |                  |
|--------|------------------|------------------|------------------|------------------|
| HEY2   | 76.7820250461545 | 79.4710406831985 | 95.5022104475922 | 44.1483976313959 |
|        | 50.8875036861067 | 58.9676332048764 | 42.1607322031054 | 42.2577689927563 |
|        | 45.9227107476843 | 48.6124127998952 | 48.5292718280498 | 48.8670821164567 |
| HEYL   | 220.192552354287 | 125.52123746909  | 154.111066539468 | 107.478392667404 |
|        | 166.317689650501 | 76.4439037944547 | 57.1070449050465 | 229.621795088195 |
|        | 72.0655217037557 | 57.6791750431251 | 66.4251023257203 | 62.3102413989199 |
| HFE    | 41.0180685293199 | 40.841391053665  | 39.5954353681031 | 38.6727842796202 |
|        | 44.0920305031178 | 40.5940318808889 | 40.6750540874299 | 38.791462837305  |
|        | 41.1241827976738 | 41.0608773166058 | 39.3133871964036 | 41.9842695818285 |
| HFE2   | 39.721757876562  | 42.1257888816374 | 40.641503836284  | 37.5996339040239 |
|        | 39.7568367479301 | 36.7342282170419 | 38.2933870238743 | 44.571915452417  |
|        | 42.3060097375421 | 37.5672792721124 | 41.0808257270221 | 41.9820792173615 |
| HFM1   | 41.678190413467  | 43.3016395799961 | 38.195965820384  | 41.0219290963778 |
|        | 46.3607182640185 | 45.2457367460834 | 43.9450023643394 | 43.1931731665131 |
|        | 38.8271346375425 | 40.6559419616644 | 39.9899430628542 | 44.4951343330035 |
| HGD    | 40.9558083259517 | 39.6493706695391 | 43.0971787292711 | 45.5869891570251 |
|        | 48.2748123114598 | 39.2985791324641 | 42.629412460409  | 37.5511560880902 |
|        | 35.860430241131  | 42.3606390470387 | 41.2267153672559 | 39.5792604499113 |
| HGF    | 39.1919930809584 | 38.4330755397458 | 41.6564075217517 | 43.4410741327254 |
|        | 36.0424990731169 | 43.9724628401189 | 39.9397419279057 | 41.7932258301997 |
|        | 36.3649677956953 | 39.2623423164488 | 40.3452320167286 | 41.809704036355  |
| HGFAC  | 38.2083710281545 | 43.7644428186265 | 39.9101908547397 | 31.6357375926754 |
|        | 40.9950639693255 | 35.4142595025086 | 36.4098694708483 | 41.1575777497576 |
|        | 40.2274522635576 | 34.3674468322242 | 34.9428206949566 | 39.8497227447888 |
| HGS    | 845.41973083225  | 915.519281747943 | 1077.94530110976 | 621.012072500314 |
|        | 1111.89793143647 | 693.727004855319 | 1255.10866316499 | 827.365231733511 |
|        | 1176.37732422904 | 917.179747195874 | 910.898566308567 | 648.885062676884 |
| HGSNAT | 49.4786466722535 | 50.2303640563218 | 44.6511073781104 |                  |
|        | 39.853175885492  | 51.0107745412152 | 44.7804080899431 | 39.2010256871265 |
|        | 48.0283573444179 | 40.4220196471124 | 40.2615278292875 | 39.7576136507593 |
|        | 40.6216891610774 |                  |                  |                  |
| HHAT   | 43.6706764143908 | 40.3384318592985 | 46.5650556481721 | 34.3595588146954 |
|        | 44.0451487108213 | 37.3799542961839 | 38.2933870238743 | 41.7419877611072 |
|        | 43.5669306063196 | 48.1392888470269 | 41.3553369544097 | 48.0350549043063 |
| HHATL  | 41.3387790895716 | 35.2143190355414 | 33.281531405287  | 37.7469621225553 |
|        | 38.5512429290626 | 40.040778349137  | 36.3194282084339 | 37.1317006162938 |
|        | 42.1594905198929 | 41.8613406887824 | 43.3085358214154 | 43.1805016690297 |
| HHCM   | 42.0532901689036 | 36.9994058279362 | 37.3687900733549 | 44.550322123994  |
|        | 38.6454098044474 | 41.9543948167375 | 41.4742337714895 | 38.3684202018524 |
|        | 40.137818555383  | 45.3530683538086 | 40.0766543123257 | 42.8864415494484 |
| HHEX   | 44.7915315085948 | 73.9376772899278 | 43.4709415392696 | 60.620259884953  |
|        | 57.4163094213712 | 57.2767879969284 | 80.354283778818  | 45.0972184964705 |
|        | 44.1519466943185 | 57.6791750431251 | 56.6884575165011 | 45.4799270968969 |
| HHIP   | 40.7609952437622 | 40.148780650831  | 39.1480645318984 | 38.6835649080278 |
|        | 38.8456942580061 | 38.2971553419489 | 41.7614975630362 | 41.3506832276112 |
|        | 38.6322728994674 | 41.6724739851995 | 40.4995052849302 | 39.6352613956998 |
| HHIPL1 | 42.8036731479932 | 48.4497719907777 | 39.8299340037009 |                  |
|        | 44.0451487108213 | 46.4343327861696 | 42.750861693377  | 47.1345949868029 |
|        | 45.2806199505029 | 40.4220196471124 | 49.3000844711116 | 42.7275315121163 |
|        | 41.3481355128089 |                  |                  |                  |
| HHIPL2 | 38.7537364570873 | 45.5842286511645 | 33.4240466670776 |                  |
|        | 41.0726336841311 | 34.0927410219282 | 49.7458652239071 | 40.7910160811527 |
|        | 33.0038344711883 | 38.3418933808844 | 35.2880714952489 | 43.0971787292711 |
|        | 39.2469742642337 |                  |                  |                  |



|        |                  |                  |                  |                  |
|--------|------------------|------------------|------------------|------------------|
| HHLA1  | 38.304249186058  | 39.0102066700839 | 42.640829914102  | 42.8235313007746 |
|        | 38.3561682218911 | 43.7630587657205 | 40.5585676679482 | 41.2551966132486 |
|        | 36.9060997041453 | 38.6454098044474 | 46.6442692119997 | 39.9519547348106 |
| HHLA2  | 39.8662795144616 | 37.5469247328848 | 37.8386378737561 | 38.745552403895  |
|        | 42.3685136297603 | 42.4580504587581 | 54.6414321010929 | 40.4359177791566 |
|        | 40.137818555383  | 39.6719190054379 | 39.5399188536544 | 37.3600014814388 |
| HHLA3  | 45.2875173643252 | 44.9849915901931 | 43.6080766584829 | 40.0337926471478 |
|        | 43.8738578522009 | 45.996661384888  | 40.9784333688086 | 44.7044140979108 |
|        | 41.6285300488826 | 50.4806959685631 | 41.2250007054033 | 47.7596919358651 |
| HIAT1  | 74.8637649912543 | 120.001312008518 | 112.261145599693 | 109.933396041701 |
|        | 98.6553805168141 | 106.035435807364 | 91.8251275769679 | 64.4801713556664 |
|        | 98.6177995580785 | 63.0748373122119 | 78.0909302258507 | 100.962000280931 |
| HIATL1 | 124.002268940785 | 180.100430567626 | 108.019575675653 |                  |
|        | 124.112216491975 | 174.021676013865 | 112.60230393988  | 177.494605794577 |
|        | 92.9043863423147 | 151.848243044839 | 100.927111474879 | 128.024853362102 |
|        | 120.980558571109 |                  |                  |                  |
| HIBADH | 313.080592198795 | 341.601353423389 | 342.475405815033 |                  |
|        | 241.222680673439 | 401.956364010068 | 596.84269596976  | 302.50850157207  |
|        | 312.245547906683 | 442.853589679801 | 568.371815312895 | 503.529187388654 |
|        | 586.508419046212 |                  |                  |                  |
| HIBCH  | 262.024495926094 | 348.862367731887 | 505.018127833201 | 149.426965431854 |
|        | 473.223156200183 | 248.321641540666 | 182.80711310964  | 289.25391828279  |
|        | 338.72596574658  | 348.206465194205 | 298.54401957868  | 694.590958116425 |
| HIC1   | 65.7587943905649 | 49.9547657591437 | 46.6588655218735 | 61.8997157694697 |
|        | 43.4544762830742 | 84.1922656126304 | 46.8613212048981 | 56.0496524902806 |
|        | 44.2607789091176 | 55.4037482627222 | 63.1566669782858 | 57.6860752168769 |
| HIC2   | 152.585423208022 | 521.029507993615 | 94.2275161759277 | 127.789065386943 |
|        | 446.757901018137 | 103.955842514553 | 261.374019422095 | 152.031470139119 |
|        | 146.90802741139  | 80.3915591207869 | 60.6505672212119 | 61.9882398986333 |
| HIF1A  | 94.6167194649276 | 72.4913548133238 | 93.0538726751588 | 239.569514501529 |
|        | 106.186051982612 | 83.5274372175811 | 84.8569316561572 | 87.799979434508  |
|        | 88.9641595603127 | 63.5489745357606 | 75.1246064433857 | 134.132985360393 |
| HIF1AN | 95.4841914842335 | 83.9760574088975 | 76.7791768896805 |                  |
|        | 91.7068354379889 | 81.2359429678503 | 84.5913809068614 | 122.988056802699 |
|        | 92.4953883194488 | 86.2563919366781 | 127.213248611204 | 103.491711140137 |
|        | 119.512426152446 |                  |                  |                  |
| HIF3A  | 41.7904796446211 | 39.9339434067497 | 40.301483914446  | 39.6705473876526 |
|        | 39.6023310244105 | 41.4186558780356 | 43.0441025203913 | 40.6723334103791 |
|        | 43.098454794209  | 41.6724739851995 | 43.3085358214154 | 40.807035645835  |
| HIG2   | 104.232196493024 | 63.6966761077037 | 117.556281726503 | 43.8002456102021 |
|        | 67.222434502867  | 55.6242009731278 | 94.4618437533343 | 45.642304356051  |
|        | 162.895543924742 | 67.8233625051884 | 49.6706535876636 | 366.515210930763 |
| HIGD1A | 316.327885002562 | 879.708199333257 | 751.953794043451 |                  |
|        | 383.371300272181 | 765.145138238955 | 659.126408705362 | 411.114836576804 |
|        | 451.820169649522 | 346.285308869994 | 274.994470779348 | 330.391945158969 |
|        | 814.991871217268 |                  |                  |                  |
| HIGD1B | 61.5882375235292 | 50.2696827764943 | 85.5839487225537 |                  |
|        | 48.9944486068347 | 44.0451487108213 | 45.2852528185486 | 40.9157352260901 |
|        | 57.445796273665  | 44.4395580493118 | 57.9713749600418 | 63.5195937348531 |
|        | 50.8999542937724 |                  |                  |                  |
| HIGD2A | 478.566247444176 | 380.736562250846 | 558.855313555287 |                  |
|        | 479.079946537291 | 486.044304392285 | 885.224377292125 | 370.41288705812  |
|        | 343.892794667047 | 582.511224532378 | 539.188951045594 | 817.631505579476 |
|        | 713.685405035516 |                  |                  |                  |

HIGD2BP 36.5099686711015 40.4772513262052 40.301483914446  
37.5382094267692 36.5849073973352 39.0620487644635 41.4186558780356  
38.7864161493321 40.9901805728485 36.7439906400209 36.8730514568925  
40.716553247236  
HILS1 41.6354649482853 40.716553247236 39.7411455670172 39.7411455670172  
39.6535880152834 39.3841861812262 42.357910063876 41.9315419791594  
38.9834959368496 47.7180816682562 39.7342718293432 39.1553169409075  
HINT1 1723.37649434054 2122.39240932934 2384.00264993279 1868.51164332659  
1712.55038816005 2405.8635632802 1561.83892117664 1266.41536472956  
4093.70002166179 1769.18069954113 1232.7632290973 2803.11698341125  
HINT2 299.188277423715 358.979854534484 222.570136481811 288.12763031226  
284.351747562807 342.829992044257 638.305455110267 414.062259640915  
393.464673405634 387.039093527273 375.818861583151 280.820745089796  
HINT3 62.1875461262634 67.3519071522322 53.2046867327331 70.3646137594581  
53.1100587888055 48.4758590019384 63.928488869459 52.9813204449021  
51.2423106372758 44.7958122466628 42.5086338413299 57.5372732453319  
HIP1 88.2427413480277 69.5544840164738 98.3240331951021 99.8063480813138  
83.0497574039035 89.9789975503195 79.1432909353319 69.5741225986433  
83.4465817617201 57.2813205536176 62.1796792097014 79.1209792219434  
HIP1R 48.7213586071409 76.9904391375645 58.9870089759222 41.0219290963778  
58.9201382292404 42.5193208629123 72.2377222744463 48.1591264215184  
72.3757385026596 60.562215295948 61.5635554619635 55.1109784383525  
HIP2 95.8002081462966 166.317689650501 142.614006543733 122.952515297686  
153.139323479953 108.806649898122 111.025105784166 113.528908699366  
164.262531918679 84.1030588938732 93.7444359334292 126.360723656793  
HIPK1 40.3478825593224 38.957687788868 38.5045333213784 42.3060097375421  
39.3999056968598 40.2903961886288 40.6336801346817 43.3696672906922  
39.3605785355553 39.2623423164488 38.4251036088595 38.1898990106602  
HIPK2 73.1931742801095 76.093116738739 84.9970776435852 126.528654651607  
82.9322141700549 85.1544284060549 80.5457814044192 120.286733441947  
76.3790849853724 101.877183008944 145.09364961191 110.947379383048  
HIPK3 49.3000844711116 42.8542642792862 42.1901757067073 62.1776700757427  
41.9842695818285 57.4777075615651 42.357910063876 47.7889447429963  
52.6922486991742 48.9088046212958 45.5055402477919 51.2318935933116  
HIPK4 39.4710743516517 40.5400384479766 39.1799070031819 37.651298468202  
40.0599807618105 40.3357777530419 48.1747307200218 41.2551966132486  
40.4997186069494 41.7405682794166 41.5421429082231 47.1060577218993  
HIRA 42.7150227340364 45.7979032939211 46.1653991089885 40.0698728584484  
42.7107928951766 43.5752393599169 42.9803717121865 36.0306975524309  
41.7627910693483 33.4316681623175 43.0016969050339 43.6753843488695  
HIRIP3 94.080489738662 85.5135159896819 151.601402122351  
81.6780581904253 164.072453709966 202.01900875263 128.391264770998  
215.869541768982 99.6340486428397 164.287737381703 157.095926797414  
122.292794686468  
HISPPD1 42.0532901689036 36.9994058279362 38.6005272730664  
41.3027031037343 38.9496515344837 42.0574848021044 40.3302268293707  
37.1317006162938 37.10170285405 41.3321861371202 36.9060997041453  
38.5279745308203  
HISPPD2A 69.6449298794042 76.6936010119768 60.2382194733872  
55.3141112947345 91.4121563150184 65.6260887743331 74.2690269784394  
89.1217605204013 91.8935361535002 88.4897895318663 82.291097567232  
76.1019439127881  
HIST1H1A 46.8954576545929 41.7337506166619 36.4564050256915  
43.9282059368202 43.9450023643394 46.0364000143537 55.695361644141

42.4580504587581 55.2114969675545 46.441301934328 47.9942520395434  
43.1805016690297  
HIST1H1B 39.7576136507593 40.2493681589104 43.0971787292711  
47.2009420656854 37.6527901109005 44.3648993568405 38.1793598983615  
38.2782436497441 37.10170285405 43.0919221375514 39.9899430628542  
40.1700117452801  
HIST1H1C 1090.86617066541 120.001312008518 167.746168796779  
224.450710664296 762.388959943712 197.569816397993 725.680256063016  
1135.43644148537 867.856842601788 65.9189023794337 81.9727730469029  
52.8455400026194  
HIST1H1D 46.0920218698606 40.3384318592985 45.2313723727673  
50.0526763693329 44.8897737954573 43.2805590023412 51.9421032049606  
45.1714698794331 42.8036731479932 41.5435611403119 43.6629145624937  
44.3521099857368  
HIST1H1E 33.4902421268456 37.10170285405 34.2890785915814  
33.4240466670776 37.2567512265363 35.5158505219112 39.8695929627783  
38.4540849632254 40.8970401536578 34.4875013487777 42.357910063876  
32.4951076826876  
HIST1H1T 39.6609238036815 38.0226905622357 33.0260566875355  
39.5050383901884 56.359578588344 44.1737502492846 42.2577689927563  
37.33030683349 38.8271346375425 39.4710743516517 34.7308008643142  
39.2469742642337  
HIST1H2AA 43.7585538437696 45.0115870036541 43.0971787292711  
46.4555908533915 41.8806343997257 43.8582747295766 44.4639405506967  
41.4508241771315 39.2809305246091 39.9948390976317 42.8263096141654  
45.0985088502363  
HIST1H2AB 43.7585538437696 36.0366673493555 37.7384958256497  
35.9521941716188 37.7576900881741 35.7034203372528 47.8947595316832  
35.6825474397235 39.3750969348308 32.0298369224145 35.046946054314  
33.5578650644246  
HIST1H2AC 959.549658414082 116.882934971483 128.032613585193  
240.476103976894 1039.58636143171 212.353676518748 506.585006700107  
208.3497732496 241.148224648134 53.8260140375214 69.4877749654481  
56.8534370691413  
HIST1H2AD 41.1523487516364 40.8880530359822 41.2365089689635  
45.0798408927912 50.3713170502557 35.9305494063137 47.8947595316832  
37.86982638952 39.4762546236449 35.2880714952489 38.2795150354677  
41.3481355128089  
HIST1H2AE 39.4710743516517 49.0697565324841 52.7005092555102  
53.8086134112366 100.205124008648 45.0882356578404 61.3620062177524  
44.293922970134 78.9521593412581 43.844855336215 37.6484782516569  
34.4570158133896  
HIST1H2AG 53.593974682612 44.1533327883807 41.3708420203838  
38.9934686082455 50.2163892855092 40.8970401536578 62.6236991757723  
39.5954353681031 50.6346949248834 36.5352572191451 38.079222289614  
37.925121819624  
HIST1H2AH 42.7150227340364 44.1239711172417 41.2365089689635  
39.1706564265495 44.0451487108213 47.2927436772465 39.8695929627783  
40.5158867964016 39.0775870687758 39.3698811593364 42.7275315121163  
37.3600014814388  
HIST1H2AI 43.0001432913058 45.4143854024453 46.7508829977587  
45.1944222548351 61.7566103867825 46.3715909653832 40.2154497375715  
37.6557714476853 49.4786466722535 43.2988017098387 41.1638563416981  
40.1700117452801

HIST1H2AJ 39.266565827316 38.0226905622357 42.8270038153139  
44.1483976313959 35.7973685350741 38.9378717994178 38.6243997507646  
42.8482181313226 45.7452456977857 44.1379638573455 41.6336636285875  
43.3744503319109  
HIST1H2AK 41.9407041937973 35.8227939208521 36.3604951341921  
38.0958223740111 40.2449343247539 39.6251842352088 33.5578650644246  
36.7460922671619 38.9834959368496 34.7308008643142 36.9060997041453  
35.5523662009011  
HIST1H2AM 83.877343750194 50.2163892855092 54.6051538001037  
44.7980740332174 77.1287755867582 39.2248354955045 74.7534423194688  
48.9826868640753 60.6706478075023 42.2614524730856 38.745552403895  
36.7762265039864  
HIST1H2BA 38.8561375693335 38.9338521051669 39.0775870687758  
42.4580504587581 39.2608760193011 42.5660695551615 40.5585676679482  
38.2782436497441 42.7150227340364 38.4187686307607 35.860430241131  
41.7575097298927  
HIST1H2BB 35.5179217192467 41.8848959280916 39.5450079747895  
37.9875302985336 39.2608760193011 35.9305494063137 39.6535880152834  
35.2642250366721 40.0403898620771 35.0082729554459 38.745552403895  
38.3291713594599  
HIST1H2BC 70.3757673501097 35.4484652445078 42.0621425894624  
52.3004056941891 89.1012752492647 40.1428591998404 82.3887053739195  
72.3822545261582 58.0722340887264 39.9948390976317 42.8263096141654  
40.6614700944853  
HIST1H2BD 1084.23003918768 88.9038123445083 258.757703729905  
138.728648830528 1051.58050264114 192.922622120507 862.031722874406  
455.444228161475 451.290681710534 90.0043438096205 97.6023731094756  
60.7103211409901  
HIST1H2BE 51.6558970571712 46.6314009405034 45.6989664108554  
48.9944486068347 51.7983110178095 38.5252456306656 45.8980298854198  
52.8622615027833 55.0748878261048 40.3235655331796 37.8372168909583  
40.3691324547049  
HIST1H2BF 71.2963721541702 48.7084357480922 47.7737810047679  
58.1798515131249 96.8490167966217 44.1737502492846 87.6018870099686  
48.6441988290952 89.1217605204013 43.2988017098387 49.4593570700221  
45.3763275588341  
HIST1H2BG 46.441301934328 83.2873728545705 97.5849495690144  
82.0292880742189 100.205124008648 52.8421046802739 42.357910063876  
47.9942520395434 132.294940663192 41.5435611403119 50.1649089793069  
49.1200355938198  
HIST1H2BH 41.6354649482853 70.0470864733496 52.0742951366864  
44.7980740332174 155.712392689325 52.7156971154405 99.7529382840954  
57.2350830635912 35.2143190355414 40.8049408996274 41.0808257270221  
47.9566297250148  
HIST1H2BI 34.3473914754963 33.939263369489 35.2838283525874  
34.2080003860523 36.6354013629791 40.1428591998404 36.5352572191451  
35.4526946152955 39.4762546236449 33.6188027862739 35.046946054314  
35.6427313468066  
HIST1H2BJ 192.058030454066 105.204861495017 152.612579631539  
169.425386468707 262.215263489321 198.010793115588 197.325473090277  
136.913434348036 179.378838766172 177.27613997459 117.8523906126  
163.917208464731  
HIST1H2BK 2966.53151444114 329.282615395786 936.978983469829  
900.517711546397 6309.53691418065 1545.76489731307 3343.07293372655

1604.80031304031 1559.50766982801 206.610705620712 284.105466865264  
235.764999941441  
HIST1H2BL 42.9104454767916 37.6383530120621 36.3604951341921  
37.8442841690502 37.8679241954337 35.9305494063137 39.3585350448719  
43.0390857698452 43.6670755115848 31.6981395162348 38.6662194645633  
35.7451401627836  
HIST1H2BM 46.441301934328 45.0905928998779 45.989212296035  
42.2496337895968 46.8674366115656 48.260931742163 53.1884505015411  
46.7980335276155 50.401623258584 49.6203214143464 46.7386599624801  
56.1875519519366  
HIST1H2BN 49.7827734675743 46.9919960628953 50.1860191642359  
39.9697332660833 54.802736966312 47.0940613507321 61.0979269700412  
58.8022152133979 42.2577689927563 40.8970401536578 40.8225507267584  
41.4508241771315  
HIST1H2BO 40.9558083259517 41.6466169548846 44.3344900481112  
39.3750969348308 51.4527545197672 35.9305494063137 41.4742337714895  
40.4359177791566 41.3803269429468 42.0621425894624 32.6463318577756  
39.7411455670172  
HIST1H3A 41.5421429082231 49.9547657591437 50.3950981988762  
45.7397504535169 64.193536444915 54.8265655909623 78.0020909283414  
46.695848687694 54.0192060888782 49.4006068471301 47.2134341420411  
41.3481355128089  
HIST1H3B 51.9545473262296 33.0553208959996 37.6557714476853  
35.8472302065546 57.5040500497076 36.0306975524309 46.1634822993009  
42.4580504587581 38.5252456306656 40.5090849993014 38.2795150354677  
39.2469742642337  
HIST1H3C 47.7267190613906 50.543526404059 50.6004078448405  
52.1201052574162 78.0077300979911 43.7630587657205 64.0985088513857  
46.8954576545929 56.5094373275922 43.4885245598939 42.6366765186182  
46.4499258373233  
HIST1H3D 64.668912004173 48.4980626712175 43.0016969050339  
44.9370339275041 95.6182216943758 61.3620062177524 74.0039764902057  
67.9103729751746 69.6511571901941 44.6918600441328 54.4825201506931  
49.1200355938198  
HIST1H3F 48.7646976789783 37.1685072112618 42.5406888281114  
42.8235313007746 161.180847265279 51.294537308199 57.8870110456492  
41.0381860307445 57.4777075615651 31.3222361955842 39.0550139257658  
42.6758568421347  
HIST1H3G 42.9104454767916 49.3581578587582 57.423873475544  
41.5464765641928 352.997455210484 76.1991031349451 154.08990201795  
40.931294690669 56.432280646473 46.325232414659 43.1931731665131  
39.9519547348106  
HIST1H3H 93.7352369697358 55.1766423847208 58.2986825661503  
63.7909104347097 527.563018145855 109.468741823602 73.8313212063649  
46.5717043290731 105.036862798568 43.401782064778 44.2142581488029  
40.2669497398702  
HIST1H3I 45.7356815244513 47.765848710116 54.7855575216687  
58.9168466928565 50.5110359971301 44.3648993568405 47.5963750520409  
45.9604707098953 51.7549258776884 44.7958122466628 40.8225507267584  
45.9693232070002  
HIST1H3J 53.7507429765038 34.2618170189676 47.2055133646385  
38.0958223740111 41.6806984441849 40.1428591998404 47.1345949868029  
41.2551966132486 36.7267557061938 39.3698811593364 39.5399188536544  
43.5738557773903

HIST1H4A 41.0608773166058 36.6002100641539 39.7411455670172  
44.265834798964 42.4864576619427 42.0574848021044 44.9863726205428  
39.1652965788406 32.2133093774284 39.3698811593364 42.0750889188255  
39.0536056496869  
HIST1H4B 49.7827734675743 46.9919960628953 48.8100349749783  
58.3475983630509 52.0583273941813 44.1737502492846 52.8496345990125  
45.2806199505029 51.1055541075029 38.0078357808393 44.4688999098904  
43.8575940017119  
HIST1H4C 2424.0414102425 3001.25236839028 2024.4791883541  
2220.90215179682 3478.67753301901 2816.7754199004 7127.13565491501  
3786.90274075023 3592.44409869527 2083.69812106867 3176.96480659196  
1598.78859278229  
HIST1H4D 42.442231667357 34.7135536792489 40.7620472083159  
41.0726336841311 43.5544347011646 43.0860383229288 45.1017494688414  
38.6454098044474 44.2607789091176 39.3698811593364 36.43924066428  
38.1421709520616  
HIST1H4E 72.4966502412724 40.148780650831 64.9072331703985  
43.8002456102021 181.966839676473 53.565717255469 84.9182861692273  
86.5926014007562 76.3790849853724 39.3698811593364 46.4753015651202  
39.6352613956998  
HIST1H4F 44.0328992213727 40.2493681589104 44.3344900481112  
39.6292788039793 43.844855336215 39.0266821712099 43.6753843488695  
41.4508241771315 39.9444191873552 40.8049408996274 41.4508241771315  
39.0536056496869  
HIST1H4G 43.0930293831497 44.1239711172417 39.6451483836089  
42.1273928203021 39.9697332660833 41.6590564937735 38.7337086062875  
39.9576138799997 37.1820543575123 42.4594149893798 46.4753015651202  
36.064718696392  
HIST1H4H 1178.52115916913 46.6996902348633 55.5567699051046  
76.7806009547111 308.393270347486 89.680151549258 192.700843009002  
195.376772135023 176.492987902471 40.8049408996274 42.8263096141654  
47.9566297250148  
HIST1H4I 61.5882375235292 43.2649781354792 42.3536549114165  
39.2780515621926 45.9104478407175 38.4330755397458 61.6544855697851  
42.7431359850339 37.7384958256497 35.0668743708816 41.2598458726002  
43.7672102682067  
HIST1H4J 47.3791873993182 50.2696827764943 54.6820069269589  
47.6687908290818 44.3557408297309 47.9503724044453 41.0381860307445  
56.3560498705517 45.2897806651929 40.1179210534118 42.5426057453993  
42.1537476443423  
HIST1H4K 112.787082951803 191.853798887866 139.08163074096  
158.071355628454 56.2305155589239 70.8674195845729 149.551650453179  
197.205643078662 93.0888239577809 64.2174369755376 57.7786197537899  
68.9258122619781  
HIST1H4L 36.6480005877129 42.0709558258414 33.7737772393677  
39.3750969348308 37.2567512265363 37.7000400506818 41.706879587091  
36.2539950294089 39.9444191873552 38.2069499294002 30.1388203764747  
39.6352613956998  
HIST2H2AA3 839.850453078119 407.818713538416 572.968592371501  
830.295872113419 1693.5377672895 358.498678171092 1487.80306986156  
456.992521713593 725.680256063016 175.578169606663 385.36587480414  
78.8181161234296  
HIST2H2AB 43.4626049853157 39.0102066700839 47.2055133646385  
43.9282059368202 47.4548471240051 41.8613406887824 43.8206425661746

41.7419877611072 40.7847110517594 35.195364621675 41.5421429082231  
40.7704587752083  
HIST2H2AC 818.927157206447 415.759723627205 561.855286945959  
902.691776563423 1604.80031304031 407.161973433666 1670.01014610464  
481.492404948275 613.740813446728 207.957319374194 347.420750861056  
88.5638310461364  
HIST2H2BE 313.528012643479 143.517244617936 184.048982286364  
71.1583251698218 180.648144492464 72.6182747525443 218.868344683409  
113.917429432477 143.693373312575 101.954354107731 191.454637685756  
59.4465684293847  
HIST2H2BF 60.4593810615882 56.3560498705517 61.2153068100932  
55.6481366056639 83.5069968129733 49.9699131196797 67.8919712859031  
61.8665316900291 74.3394153125605 55.9283039581662 80.0113001016496  
45.0985088502363  
HIST2H3C 38.5007204246293 44.5152708955623 47.7737810047679  
55.6481366056639 82.1344514651393 50.8533737532786 43.0930293831497  
42.0494116081998 35.6139301508335 43.401782064778 36.6298807161755  
36.449101775775  
HIST2H4A 114.148080724618 47.6229101519945 55.7764940944098  
55.0604256312495 100.774098314706 53.2046867327331 81.454335582503  
58.4200819624972 76.9953921834156 51.1169368198437 43.3085358214154  
44.6484005362281  
HIST3H2A 252.313870846326 112.944044862693 64.9072331703985  
46.4555908533915 255.559793355361 105.036862798568 200.002687565519  
76.5444845463963 144.898757916905 54.2830238965339 61.1801493883012  
49.3087627580849  
HIST3H2BB 49.1868644496737 42.6939394537076 42.7303139017786  
38.4208429103799 59.4830424460714 44.6524308640784 59.9792284253187  
50.0526763693329 49.641159251878 40.7063426028871 46.6442692119997  
39.4490233720848  
HIST3H3 39.9697332660833 42.5269793679335 42.640829914102  
41.7614975630362 36.7356360093603 40.650742261428 41.253645578517  
47.3791873993182 47.1744296124496 39.5637454855233 41.2598458726002  
46.3411353377615  
HIST4H4 49.4151347850687 45.6533175604486 39.4710743516517  
43.6726153508978 47.4548471240051 36.6271061451613 38.5066108855005  
36.9355798143571 44.3440839686558 37.5343260962758 35.6970528713709  
41.6550823405646  
HIT-40 44.6231541342 37.6383530120621 39.0775870687758  
37.29566077996 39.2608760193011 40.3357777530419 38.4005795891396  
44.0390019242862 36.9060997041453 39.2623423164488 40.3452320167286  
48.7814131120945  
HIVEP1 130.703767898434 70.9179240997848 72.2797007105795  
184.50283792606 104.80882886573 111.939677225005 99.9896394343368  
134.83544047809 108.718422641679 73.9732553364283 91.8414653633828  
102.655050997714  
HIVEP2 70.9419509323007 59.1938299291358 69.9179689232341  
75.2475238554276 81.2359429678503 80.2112932898502 76.7483302168542  
77.523734787944 81.0169370911764 71.7464249053513 69.1945249877407  
75.4935574755043  
HIVEP3 40.5654775358427 36.89524015739 36.5474283500601  
35.8472302065546 39.2608760193011 41.3553369544097 44.2166118829877  
41.1575777497576 46.4164127487052 36.0481934423077 48.6767028205398  
38.4330755397458

|           |                  |                  |                  |                  |
|-----------|------------------|------------------|------------------|------------------|
| HJURP     | 176.816741656659 | 112.944044862693 | 80.943990104641  | 68.0471049167726 |
|           | 172.676819138152 | 47.0027453663546 | 188.099292617901 | 187.277044459942 |
|           | 145.213187433836 | 40.5090849993014 | 39.9899430628542 | 45.8546719310325 |
| HK1       | 477.924466983414 | 589.395944599882 | 892.323580265478 | 489.622327794168 |
|           | 421.971171686029 | 566.318259999405 | 437.84407370064  | 298.252355588344 |
|           | 1408.59798540643 | 644.733901442573 | 643.9329225331   | 534.292112344761 |
| HK2       | 176.492987902471 | 80.0502531022254 | 63.2475738480323 | 114.674541610026 |
|           | 76.9788081114727 | 60.2867996701867 | 58.8361533901971 | 104.822963389102 |
|           | 143.173898886465 | 70.4895190282848 | 68.3157692917711 | 148.312100828662 |
| HK3       | 96.0236731791095 | 63.6966761077037 | 60.1874689914535 | 495.26603220907  |
|           | 53.3086645804786 | 78.9521593412581 | 92.1455386560941 | 62.9922928277769 |
|           | 40.0403898620771 | 42.0621425894624 | 43.401782064778  | 46.3411353377615 |
| HKDC1     | 82.5344501505114 | 48.4980626712175 | 44.3344900481112 | 39.2780515621926 |
|           | 39.859345745831  | 36.2768299545794 | 43.9450023643394 | 41.9315419791594 |
|           | 37.7384958256497 | 39.7835513496873 | 37.4642807402741 | 42.8864415494484 |
| HKR1      | 85.0753342967819 | 58.8281931439093 | 82.8205269728224 | 61.8997157694697 |
|           | 58.5450868286167 | 63.5738862549306 | 96.7125250803971 | 81.8491450876942 |
|           | 68.6379135603075 | 114.796237914478 | 86.2118355769367 | 85.1114448808779 |
| HLA-A     | 5387.08056045279 | 7627.46814033012 | 7235.0789252269  | 7393.77508374057 |
|           | 2697.96877833185 | 3313.98659031004 | 4784.36905964712 | 3592.44409869527 |
|           | 5354.58328030315 | 2830.73694055758 | 5156.59948231705 | 3001.25236839028 |
| HLA-A29.1 | 871.771475356705 | 1012.91803181784 | 47.2055133646385 |                  |
|           | 3176.96480659196 | 1122.44489338159 | 648.885062676884 | 231.333080775773 |
|           | 1132.19026676901 | 1925.20977162704 | 343.262403838579 | 848.079114196986 |
|           | 471.874412428677 |                  |                  |                  |
| HLA-B     | 2474.22199172028 | 6186.45345364665 | 4427.89837060471 | 6483.09366281532 |
|           | 1069.3975598703  | 1338.4148149889  | 2816.7754199004  | 1125.31394383117 |
|           | 2002.0536042686  | 1055.00793806075 | 2911.10227993347 | 1060.64261592822 |
| HLA-C     | 52.8427643366617 | 127.1365842097   | 80.531334073336  | 126.420070148631 |
|           | 49.1928206164702 | 49.8135461150818 | 74.0995052892511 | 77.3367966395554 |
|           | 74.220854748627  | 61.6255834422379 | 85.9286114777649 | 71.7408778060956 |
| HLA-DMA   | 731.670315613547 | 677.481235695517 | 574.847203528544 |                  |
|           | 2417.02418518222 | 436.35723605534  | 600.34379987143  | 858.228943026906 |
|           | 672.759115794267 | 905.76958446454  | 306.115856873599 | 646.791777335656 |
|           | 288.552986300755 |                  |                  |                  |
| HLA-DMB   | 867.856842601788 | 505.650842529816 | 444.471597593258 |                  |
|           | 2384.00264993279 | 194.703024752864 | 540.037371261388 | 419.741944629785 |
|           | 766.027617496754 | 307.445116836976 | 292.247095517604 | 374.026381773215 |
|           | 221.383645621978 |                  |                  |                  |
| HLA-DOA   | 180.80065212092  | 113.26670675749  | 95.1666040574435 |                  |
|           | 458.351940464467 | 78.7320333941149 | 113.612874206329 | 175.41042153356  |
|           | 205.510539955583 | 62.370559099758  | 100.413031488199 | 138.349952332963 |
|           | 50.379587451669  |                  |                  |                  |
| HLA-DOB   | 48.2910530887214 | 66.4300949831964 | 57.2960245538881 |                  |
|           | 158.071355628454 | 58.5450868286167 | 38.3418933808844 | 42.0605906240248 |
|           | 54.0507720792049 | 45.9227107476843 | 44.4652605017595 | 42.5426057453993 |
|           | 43.6753843488695 |                  |                  |                  |
| HLA-DPA1  | 1301.07436212673 | 1525.47741161586 | 913.230569760993 |                  |
|           | 5177.04105968809 | 379.865108456536 | 1307.19925493293 | 671.959673037066 |
|           | 974.296760034984 | 319.871452890512 | 364.962649416567 | 484.651969259966 |
|           | 392.237227927376 |                  |                  |                  |
| HLA-DPB1  | 61.2130609867477 | 69.1414574152997 | 54.7855575216687 |                  |
|           | 234.308728996238 | 44.2607789091176 | 59.2643906275025 | 83.6935756500468 |



70.6568303458436 41.4636047919453 41.6373771565199 55.9269493191353  
44.7401523707775  
HLA-DPB2 39.8234920704779 40.3104838541906 39.0470836345045  
41.6045220683604 38.3085139808968 39.3565586789274 36.8369172900902  
45.3389970694851 39.2809305246091 34.614788807503 41.4508241771315  
39.5748670524951  
HLA-DQA1 965.530928317269 582.017297217368 327.283431584541  
2803.11698341125 136.582966744378 186.265538054701 487.261132702908  
551.915864019927 99.6340486428397 91.6713614282714 149.312893905408  
119.833821068193  
HLA-DQA2 42.442231667357 45.7979032939211 46.2625470410195  
47.481302504066 42.7982502551634 41.8613406887824 45.3597029614942  
42.5435283762933 49.1940901905636 44.1379638573455 36.2435874904689  
40.3691324547049  
HLA-DQB1 99.9752275166514 206.703865774092 132.84476910529  
511.261925898948 65.5029051840465 106.317388820963 114.526825145076  
80.5508300225954 53.6446045619513 70.7003843117511 42.170702295259  
51.0647893605839  
HLA-DQB2 51.7607563002005 65.8082111065882 48.3847843498476  
92.8026641003757 40.7779767565889 41.8613406887824 54.9765783642973  
54.8412943008635 88.1910986077499 66.6332042895961 48.3847843498476  
38.8495095797881  
HLA-DRA 3502.80810319252 2588.47871581066 1595.69503047506  
11795.0477101407 949.278493776928 2892.02001412369 4015.88651424568  
2061.66570137425 2045.24530722676 848.079114196986 1188.3486464341  
868.899376368472  
HLA-DRB1 491.468862309918 44.9370339275041 36.0306975524309  
1969.8871504719 43.844855336215 38.2293008890613 728.679189702033  
241.118200030836 1099.52344340557 147.579873410455 544.946796643478  
146.61436309209  
HLA-DRB3 157.356512456687 154.067791946816 78.450972383987  
1000.65752290829 58.6481644777552 138.12608134713 191.631209717054  
91.0354017559834 218.675464231277 81.915829566737 138.637058021129  
133.244526666651  
HLA-DRB4 466.935292808402 396.355023788839 221.450737998571  
3296.66056024983 129.014076422249 154.551927302005 1053.67279913417  
361.158558609751 568.371815312895 106.752660061588 327.844083226326  
90.2790229242453  
HLA-DRB5 39.5676051939342 39.0102066700839 46.7508829977587  
41.3027031037343 47.3172462673426 38.8336427948187 1517.66978539206  
793.570993808328 38.7298222155532 335.167786298149 1738.00955642263  
54.5921287593554  
HLA-DRB6 137.395516155158 176.687970262952 85.9692990407066  
448.196293409768 89.3456573431171 229.379918828848 231.824347524066  
112.261145599693 162.352052340273 75.6471706262645 121.135772395548  
64.2769859135548  
HLA-E 207.710354513208 363.527881831453 453.260719561292 726.804513440787  
164.462951076718 290.956194006554 180.902423012987 204.502683458676  
206.312848708143 177.722828589884 385.064309855006 181.266908509671  
HLA-F 326.250872625748 602.726022292973 494.300858189605 704.601607617837  
159.071016200059 221.383645621978 352.339572553069 188.567635000971  
316.548339196872 126.319731178054 311.985010273921 182.37433006793

|        |                  |                  |                  |                  |
|--------|------------------|------------------|------------------|------------------|
| HLA-G  | 90.9521112485099 | 104.740168626646 | 93.4180535865914 | 146.405413944753 |
|        | 58.5450868286167 | 67.1729762600915 | 81.6458112867541 | 71.9771425105735 |
|        | 84.158736606096  | 75.5171857162768 | 90.2790229242453 | 69.4383198054368 |
| HLA-H  | 1465.08435775014 | 2678.43227619157 | 2232.61002288121 | 2721.97551918611 |
|        | 676.672146226382 | 970.379875059112 | 1377.24483375075 | 724.881002237334 |
|        | 1201.00042684883 | 543.975237512604 | 1478.26733379357 | 604.951648398924 |
| HLCS   | 55.2515150764173 | 63.7226299242322 | 65.6165636276827 | 51.1313686723929 |
|        | 106.035435807364 | 58.8090653936339 | 65.4784797364469 | 61.6839343510302 |
|        | 83.3905516293346 | 74.6847594297153 | 65.088713927995  | 65.8959431201418 |
| HLF    | 39.9697332660833 | 41.554942319225  | 43.4709415392696 | 55.0604256312495 |
|        | 37.956732373465  | 101.693848821246 | 40.2154497375715 | 43.6434576713809 |
|        | 34.9428206949566 | 66.9218519793499 | 77.2834482217973 | 47.6040671292013 |
| HLTF   | 104.27034824534  | 133.86254468037  | 135.00141569592  | 84.8948024208923 |
|        | 188.120766710975 | 123.176449895397 | 131.010196997585 | 117.948047796034 |
|        | 149.173801572239 | 115.116519358318 | 100.802977734227 | 119.833821068193 |
| HLX    | 64.1882546112044 | 60.6779753362314 | 56.0800798275077 | 129.190555260332 |
|        | 40.5235471987417 | 70.7782698163955 | 46.7800033479223 | 46.0633179231318 |
|        | 46.4569566520107 | 51.8412522234186 | 63.9371474698484 | 44.0451487108213 |
| HLXB9  | 50.379587451669  | 39.2907645923217 | 45.3974838013476 | 43.074472921841  |
|        | 45.9104478407175 | 44.7804080899431 | 42.4939802311136 | 43.3262148375525 |
|        | 52.2631308081333 | 38.745552403895  | 44.9713479185144 | 44.9070250604284 |
| HM13   | 90.8831233784641 | 87.1183334887694 | 92.3659612653822 | 148.654594696193 |
|        | 161.075134901675 | 72.6182747525443 | 98.4699679900651 | 57.50915811428   |
|        | 89.7002002853947 | 49.4006068471301 | 55.4294204189628 | 65.084620579901  |
| HMBOX1 | 66.4399491500833 | 56.3560498705517 | 66.9239565096247 |                  |
|        | 64.898351831341  | 51.5888395924843 | 47.8636003588181 | 66.8475050031365 |
|        | 64.8336014343435 | 51.3511088648386 | 95.6182216943758 | 92.1646038105091 |
|        | 62.8485724004124 |                  |                  |                  |
| HMBS   | 93.0714382925187 | 96.7280766051052 | 111.735319884512 | 85.0308877626746 |
|        | 149.09682467711  | 69.5080454202415 | 125.588228083829 | 76.9904391375645 |
|        | 116.694275999729 | 74.9006142438341 | 75.7502062965698 | 77.1521355570024 |
| HMCN1  | 44.7044140979108 | 34.3715326040967 | 40.1985790927248 | 48.9944486068347 |
|        | 42.9090346219023 | 38.4330755397458 | 42.0605906240248 | 43.7396619462033 |
|        | 41.5635499110307 | 35.4990901121893 | 39.4410515050885 | 44.4475838947656 |
| HMG1L1 | 84.6279355865799 | 91.5202521578181 | 111.077646506425 |                  |
|        | 99.5125674355716 | 150.31039735991  | 120.508644792138 | 123.868848519181 |
|        | 96.9476136220382 | 118.450965500771 | 80.2774079897733 | 82.7309298534989 |
|        | 114.363816429963 |                  |                  |                  |
| HMG20A | 60.1705241170421 | 70.9179240997848 | 51.9214790114499 |                  |
|        | 66.4047895961325 | 74.6833250738044 | 69.7677752398541 | 63.0119737420787 |
|        | 54.1731035633439 | 79.2824265044758 | 102.490465676619 | 89.9227845135785 |
|        | 79.2525964926483 |                  |                  |                  |
| HMG20B | 562.531738167208 | 500.794458547464 | 753.976423227915 |                  |
|        | 343.591727067749 | 869.879392791086 | 403.335980469043 | 432.807626784742 |
|        | 550.642253702646 | 490.301992866742 | 633.819901764391 | 569.966632625157 |
|        | 362.724027984972 |                  |                  |                  |
| HMG2L1 | 48.2549905619119 | 52.4351670989268 | 45.8445073504868 |                  |
|        | 41.7614975630362 | 51.2525124735102 | 50.8533737532786 | 48.0283573444179 |
|        | 42.7431359850339 | 45.1569741609597 | 39.7835513496873 | 45.6348103033479 |
|        | 49.0986627051784 |                  |                  |                  |
| HMG4L  | 42.2455707947223 | 40.716553247236  | 48.0191002461099 | 44.7980740332174 |
|        | 40.4639532172338 | 41.6590564937735 | 47.4439407315335 | 46.4672637826582 |
|        | 46.6944238390932 | 47.4767851750188 | 51.4413099192899 | 46.917149434588  |

|         |                  |                  |                  |                  |
|---------|------------------|------------------|------------------|------------------|
| HMGA1   | 219.431561967403 | 147.602298697211 | 131.045615546105 | 98.3142231283069 |
|         | 218.354538624978 | 66.4015820814547 | 173.11353027932  | 94.0749342825094 |
|         | 201.301705082976 | 80.1210785681103 | 64.0541263553251 | 80.1210785681103 |
| HMGA2   | 40.6559419616644 | 43.2932256291516 | 40.1474543172332 | 45.4634652319753 |
|         | 43.3832826368789 | 41.3177250076876 | 40.7340599105623 | 40.7311497914871 |
|         | 40.1725584225343 | 39.4710743516517 | 38.8034431562381 | 42.1537476443423 |
| HMGB1   | 49.1868644496737 | 50.8812920005251 | 46.0727230219512 | 47.2009420656854 |
|         | 56.359578588344  | 66.4015820814547 | 56.7780520416533 | 50.9099078696349 |
|         | 69.5741225986433 | 58.2818491355907 | 64.5044423866259 | 52.4351670989268 |
| HMGB2   | 151.601402122351 | 220.597255695837 | 132.52749757795  | 192.356440003154 |
|         | 193.15756263121  | 160.853643241489 | 398.538881167487 | 214.537530518962 |
|         | 361.57814355509  | 95.1000239210194 | 87.3815040456105 | 113.388372364837 |
| HMGB3   | 170.850089909832 | 136.517445122438 | 86.9924799927707 | 80.1809075683154 |
|         | 184.750252804038 | 67.5812474586277 | 154.386505379733 | 241.849566505679 |
|         | 173.711189659585 | 87.6598268114592 | 75.6883778954949 | 61.7502624458447 |
| HMGB4   | 37.1485601150873 | 40.148780650831  | 42.0621425894624 | 40.8681871019812 |
|         | 41.3755760434934 | 39.2248354955045 | 39.7162631015511 | 37.33030683349   |
|         | 41.5635499110307 | 41.9666541498638 | 44.5195179655313 | 43.3744503319109 |
| HMGC1   | 105.802035886293 | 127.337191367244 | 125.383837024985 | 110.431464700539 |
|         | 96.7351644023249 | 115.143810463938 | 215.907790093087 | 167.746168796779 |
|         | 156.884346540644 | 182.246578375636 | 137.802147212644 | 133.067727272864 |
| HMGC1L1 | 39.3303857231606 | 37.7384958256497 | 43.3085358214154 |                  |
|         | 40.646702696033  | 39.0916553915607 | 39.7394181011603 | 43.1931731665131 |
|         | 40.9808244695721 | 40.9423087727566 | 42.0217776707284 | 41.4508241771315 |
|         | 39.7938220956242 |                  |                  |                  |
| HMGCR   | 150.925721934159 | 249.246628143531 | 181.966839676473 | 234.45840519702  |
|         | 172.777241940677 | 110.637910297739 | 302.422475486532 | 326.902009704746 |
|         | 468.267514612816 | 217.425223098994 | 243.803668806533 | 208.529062113623 |
| HMGCS1  | 440.728435508514 | 214.342804055754 | 279.632025097952 |                  |
|         | 304.777565078155 | 691.94603958547  | 271.50380898418  | 1850.06063216244 |
|         | 1516.33074288338 | 1106.57048989685 | 363.269936098507 | 409.899024157206 |
|         | 380.015934356432 |                  |                  |                  |
| HMGCS2  | 40.9558083259517 | 4048.33132153903 | 4717.02689540013 |                  |
|         | 59.4674205670657 | 60.1730663840476 | 111.760213205992 | 1090.86617066541 |
|         | 3999.32180022337 | 1487.80306986156 | 1343.66876893729 | 1591.51486001004 |
|         | 1297.78424326775 |                  |                  |                  |
| HMGN1   | 1658.86829668934 | 2830.73694055758 | 2803.11698341125 | 1029.12917222294 |
|         | 2640.06306087033 | 1255.10866316499 | 3800.19142219719 | 2133.78836857697 |
|         | 2911.10227993347 | 710.579735673002 | 892.323580265478 | 1401.46625360427 |
| HMGN2   | 196.247893540766 | 332.659496278775 | 272.022473793857 | 220.743173420176 |
|         | 313.528012643479 | 374.026381773215 | 515.856807472321 | 307.974082654351 |
|         | 510.525676243746 | 163.20801480093  | 183.393353108744 | 221.847615564378 |
| HMGN3   | 40.7609952437622 | 41.7337506166619 | 42.1901757067073 | 43.8495248991589 |
|         | 42.5449473689701 | 39.066284740632  | 42.0605906240248 | 40.4359177791566 |
|         | 43.3262148375525 | 42.3413611855132 | 39.3086414047188 | 40.716553247236  |
| HMGN4   | 337.363827785838 | 792.022171185649 | 343.591727067749 | 403.664724682094 |
|         | 1154.6386362     | 576.001941308305 | 2248.64628069362 | 1178.52115916913 |
|         | 374.723141438448 | 404.599730419192 | 420.401914084346 | 638.848775860866 |
| HMHA1   | 55.5276281380084 | 58.6249721386149 | 41.528370959196  | 81.8727530460686 |
|         | 51.5888395924843 | 50.8533737532786 | 43.1931731665131 | 62.1934012861178 |
|         | 42.7150227340364 | 48.6124127998952 | 42.7275315121163 | 39.7411455670172 |
| HMHB1   | 41.9407041937973 | 34.6306468196142 | 36.8730514568925 | 47.2009420656854 |
|         | 34.6227169056411 | 35.314469458379  | 40.5585676679482 | 35.0510338774593 |
|         | 37.6383530120621 | 37.8217989841918 | 51.9302027391447 | 35.6427313468066 |

|           |                  |                  |                  |                  |
|-----------|------------------|------------------|------------------|------------------|
| HMMR      | 74.8637649912543 | 100.43365828852  | 112.924613715969 | 47.5733603903505 |
|           | 157.856158440506 | 44.6024422254257 | 132.24963384417  | 128.937837181433 |
|           | 98.0473811574767 | 41.6724739851995 | 37.7963032976457 | 43.5738557773903 |
| HMOX1     | 301.728842562175 | 106.160416826673 | 121.195506364658 | 321.454824353597 |
|           | 206.703865774092 | 155.435700005184 | 522.49156295512  | 569.966632625157 |
|           | 93.6124140212565 | 59.4969799685856 | 68.6199296680241 | 72.3297091475814 |
| HMOX2     | 39.6609238036815 | 41.7337506166619 | 41.8751578329365 | 32.7960913111995 |
|           | 39.4693871570028 | 44.9896851005259 | 40.1235656101329 | 38.5457716679071 |
|           | 41.863927676552  | 38.528621456378  | 35.2339574411711 | 38.3291713594599 |
| HMP19     | 41.0608773166058 | 44.4411734611229 | 39.3709357615493 | 43.9282059368202 |
|           | 37.7576900881741 | 36.6996187567892 | 32.1218888714537 | 40.1474543172332 |
|           | 41.4636047919453 | 39.4710743516517 | 37.6484782516569 | 36.9976231206067 |
| HMX1      | 47.4678477186801 | 44.4411734611229 | 42.0621425894624 | 47.3574589211166 |
|           | 49.0828761839116 | 42.4580504587581 | 43.5627649099623 | 44.5029690493211 |
|           | 44.0519245668737 | 49.9493230064613 | 45.0589947942306 | 47.5025821041537 |
| HMX2      | 46.0920218698606 | 44.7829632472754 | 52.5353664902258 | 52.6947911480086 |
|           | 51.4527545197672 | 46.3715909653832 | 42.4939802311136 | 49.2901038327894 |
|           | 48.3954967265007 | 43.7303813515864 | 36.6298807161755 | 43.6753843488695 |
| HMX3      | 39.1590964332473 | 45.4143854024453 | 40.301483914446  | 38.2041059863839 |
|           | 38.1644569189523 | 37.8102105794655 | 40.1235656101329 | 44.1311654985682 |
|           | 40.9901805728485 | 41.7405682794166 | 41.8168470823451 | 37.4554876386402 |
| HN1       | 73.3448790478335 | 100.774098314706 | 83.1874704625702 | 48.856176220627  |
|           | 130.615540145155 | 59.8102324370568 | 107.325456368022 | 70.9702772728923 |
|           | 154.93193897888  | 41.4397539024976 | 48.1352470945488 | 69.2213838763756 |
| HN1L      | 63.5693267269002 | 76.093116738739  | 57.7415362494584 | 48.9944486068347 |
|           | 59.1948983423381 | 52.6226745117396 | 70.5534237141767 | 54.6067620335514 |
|           | 75.1328739717464 | 98.4084364053686 | 89.8354888041611 | 90.4160198134865 |
| HNF4A     | 44.0566054055178 | 40.4359177791566 | 40.7873632847691 | 45.2806199505029 |
|           | 41.4479871197761 | 44.7804080899431 | 40.5585676679482 | 40.1985790927248 |
|           | 39.5424643148065 | 42.6211340086915 | 43.3085358214154 | 42.7303139017786 |
| HNF4G     | 43.0001432913058 | 48.9259041798949 | 42.9104454767916 | 37.8442841690502 |
|           | 41.467005949568  | 47.7556758818053 | 44.2166118829877 | 39.0620487644635 |
|           | 56.3441077510744 | 46.1390887492649 | 40.8225507267584 | 45.7562276914441 |
| HNMT      | 119.311590524726 | 79.990130381874  | 111.522812019895 | 138.972884942374 |
|           | 77.4769634299218 | 130.506891299903 | 62.2613190008072 | 88.1068080491008 |
|           | 91.7579171517883 | 141.471672990444 | 121.782045054657 | 133.862544468037 |
| HNRNPA0   | 441.397616937015 | 370.568550943181 | 268.683528469759 |                  |
|           | 217.575115287224 | 348.165210494253 | 428.729935028911 | 226.090904721424 |
|           | 263.587821561589 | 256.55408314817  | 300.762511215441 | 421.013324906569 |
|           | 489.232537791775 |                  |                  |                  |
| HNRNPA1   | 55.3153799233744 | 65.2295773603116 | 67.895735332714  |                  |
|           | 45.334106390212  | 76.301438841111  | 82.7853677822046 | 55.0154661412165 |
|           | 55.3664856922473 | 75.0310858627394 | 45.4614234442527 | 58.7722169145704 |
|           | 82.3254961129575 |                  |                  |                  |
| HNRNPA3   | 54.0990839134272 | 58.1027665533767 | 54.4384603094793 |                  |
|           | 40.7481155008596 | 64.9072331703985 | 111.760213205992 | 54.9765783642973 |
|           | 114.533239859288 | 53.2046867327331 | 47.2299678280724 | 66.3481553496766 |
|           | 81.0169370911764 |                  |                  |                  |
| HNRNPA3P1 | 40.8681871019812 | 39.5050383901884 | 43.0016969050339 |                  |
|           | 33.6816578730693 | 37.1565984182084 | 53.8461734834857 | 35.7055410599146 |
|           | 41.2551966132486 | 36.6312676076142 | 38.528621456378  | 33.4071187618571 |
|           | 47.6938628797168 |                  |                  |                  |
| HNRNPAB   | 1204.34388579291 | 989.0602710707   | 1195.24078948059 |                  |
|           | 759.94822128584  | 1382.25775340179 | 1076.05074395483 | 1257.19844370057 |

1319.32406112346 1370.76188322111 537.213035625492 753.491584605447  
997.492549573274  
HNRNPC 111.041991642022 310.821299796803 247.193935816149  
281.840536529928 249.308868215205 252.097980496533 218.868344683409  
138.783011990219 191.896416838806 196.427458710993 205.672652429972  
253.398345052444  
HNRNPCL1 43.2135791259317 42.2114134935898 42.0621425894624  
39.7840818430159 43.004943518025 39.3565586789274 39.7162631015511  
38.5457716679071 43.1180113655693 38.8173773425835 39.9586075662602  
39.0916553915607  
HNRNPDP 1287.41527826233 1263.76838179117 1638.16317738035  
1025.7433359938 1485.68317899614 1359.9708539999 1829.30985071028  
1533.38581753491 2178.59848996529 1301.07436212673 1359.9708539999  
1604.80031304031  
HNRNPF 122.849949163123 86.5926014007562 78.7103847663605  
84.0899854321388 85.7842344710572 75.5561597374812 134.567947469561  
151.266092912661 73.6965494979349 70.9702772728923 74.280612516205  
79.1209792219434  
HNRNPH2 57.6913861717513 73.6855877240541 59.9690744676539  
69.1931891474114 63.955655956484 84.4433277732938 55.2998422481855  
49.2019743609873 82.8318970266303 45.7371044724173 71.5249259772583  
72.2211523775459  
HNRNPPL 132.37539586883 169.603165827302 148.906660152784  
131.347995391441 157.161381086926 84.1922656126304 223.219262492785  
161.075134901675 240.841214170409 122.702789229752 112.048972076936  
196.844428284247  
HNRNPUP 298.031228833741 198.922575188741 245.769212889294  
333.731080636948 201.236491769447 256.302432791187 282.115786635657  
528.840700144811 203.178221073902 566.318259999405 665.122091380755  
445.644244692294  
HNRNPUL2 277.069127740648 197.421622315466 219.134220280612  
198.729330487352 252.616382150668 239.350719871688 356.318517117856  
450.972039573066 300.412043023998 360.248832535446 384.727543700024  
280.920208331594  
HNRPA1L-2 135.106756607914 156.864177272437 126.319731178054  
86.3663084195994 162.30238363798 157.568088397305 124.44575078108  
187.422036538629 173.013258797349 123.095695502815 149.386774957393  
240.841214170409  
HNRPA1P4 434.060745987869 409.554706384667 383.705244574204  
241.849566505679 642.946369683508 611.776512504215 415.906208143859  
592.399245288911 536.512119139536 393.944898808828 529.977491403949  
831.578043520215  
HNRPA2B1 1698.18614771363 1945.33618761041 1716.82239359769  
1280.77934331703 2384.00264993279 1186.06822787922 2167.91218703382  
1950.93175239958 2575.86919902296 1057.44729389649 1287.41527826233  
1744.56688411113  
HNRPC 82.6246523811721 63.5222607845861 75.7464604972652 86.3663084195994  
102.282066142307 77.0226403968683 86.9185256838836 98.9657264176664  
95.2956103624468 78.6859709780134 72.544822622412 121.851515410237  
HNRPDL 219.918644151214 323.705254926762 430.618167106529  
147.444007777385 310.900527198512 184.536327776767 192.171116215791  
173.18824792041 196.096147690942 207.513604688444 287.363928615517  
292.735673136799

HNRPH1 97.6205705034407 132.098298410135 167.430013807712  
 104.784718169822 120.309345127552 137.10896135739 88.1413320312949  
 95.8734933265537 100.824660338235 51.6778366958973 77.3640580819535  
 100.623973215137  
 HNRPH3 97.3929166450379 79.4442697175874 79.6133633483649  
 77.7973642829228 75.9397606694785 163.877163712385 107.015362116555  
 78.8968326770219 146.007510897838 111.347228208501 104.986694941968  
 157.639656300073  
 HNRPK 270.756849919679 421.611594456877 251.65044168003 284.66531382201  
 314.458148321064 381.198152331624 269.857104259782 266.905855859261  
 299.136348099827 195.790389809892 221.76904201992 356.133736281036  
 HNRPLL 48.8941062980393 61.3428092991286 42.3536549114165  
 62.6048727240291 47.4548471240051 65.6914955077809 53.0277416531043  
 50.857522488428 59.4236178078244 48.3693338695392 52.6960621424156  
 65.6213260281822  
 HNRPM 659.126408705362 1303.33517942343 889.638287212686 804.592753722875  
 1337.53997230271 940.781370938596 1073.84987604662 957.682898193927  
 1294.42501356365 625.805967352327 903.756866967447 790.094848284547  
 HNRPR 500.431738940003 1060.64261592822 644.368005872231 520.415257194417  
 1303.33517942343 745.219025960188 1012.0373748933 593.801086643125  
 880.992328229414 323.453481668415 580.109585240053 512.691506909762  
 HNRPUL1 666.265306908449 748.913487947791 721.887210480162  
 502.67939538729 1052.16097214718 597.191426276771 872.305108096296  
 727.788854407888 950.740991182127 686.154904023493 593.801086643125  
 484.968116511768  
 HNRPUL2 192.41551362197 170.999578495858 217.189489936251  
 177.27613997459 353.463970335835 249.584588371496 246.433145017965  
 268.265540230814 255.284866561352 344.314901683001 265.860397918913  
 247.676607756929  
 HNT 160.264217082275 65.2966707319433 51.5796347007399 85.7013212907541  
 68.7342341724306 111.347228208501 40.6130792100165 71.2168693013526  
 42.6679886757687 61.227809931332 70.9970523709176 41.6086894860496  
 HOM-TE5-103 41.5421429082231 47.1332119496722 42.4890076400051  
 42.8235313007746 38.3085139808968 50.560825686187 43.8206425661746  
 41.0381860307445 38.0702079388879 43.6033221838149 39.3086414047188  
 41.1554481567603  
 HOMER1 44.6231541342 47.4740726032707 38.6727842796202  
 35.6027791404152 42.9090346219023 38.7340969861754 40.4359177791566  
 42.7431359850339 45.1899271235974 39.9948390976317 38.5668610487033  
 39.9519547348106  
 HOMER2 95.9750691854349 46.2286164776607 51.371775055873  
 62.9364422691302 70.8515676385543 51.5522731200852 56.2181240696479  
 128.070047614488 63.8357465390633 47.611018474151 47.3915967256105  
 51.0647893605839  
 HOMER3 138.67794356779 111.025105784166 150.221698290502  
 136.786772972738 206.791464145857 116.685453817071 143.913007288353  
 138.349952332963 168.036319777283 114.136234102574 109.076358658606  
 88.9641595603127  
 HOMEZ 40.5654775358427 38.6414316877471 48.1331309338997 38.9534635879195  
 42.0709558258414 43.4681646416585 39.4600924554505 38.6454098044474  
 43.1805016690297 37.0320432433314 43.1931731665131 40.5703581862752  
 HOOK1 288.190015621249 147.209004629384 159.268245287939 95.6215575902122  
 153.405734390061 72.8472187581193 293.755623192857 150.114520857436  
 133.178271848651 112.02980664709 132.851109034738 102.38706554984

|         |                  |                  |                  |                  |
|---------|------------------|------------------|------------------|------------------|
| HOOK2   | 132.117013391364 | 243.403622361932 | 303.390680076861 | 78.7450149191851 |
|         | 311.985010273921 | 100.423344358771 | 203.729732499418 | 138.085451866914 |
|         | 233.263058459431 | 210.50519205965  | 195.376772135023 | 185.378190201718 |
| HOOK3   | 69.1945249877407 | 69.4347592040783 | 60.2528550551807 | 70.506090074243  |
|         | 61.2130609867477 | 69.8231400816467 | 59.6780848951767 | 56.7569186600983 |
|         | 61.5190597187008 | 48.665578118898  | 56.8056093987178 | 61.7502624458447 |
| HOPX    | 334.527003257901 | 498.608204176238 | 187.439021508049 | 145.267770598988 |
|         | 67.6699686085575 | 199.776860110557 | 63.4889805083459 | 215.109108265052 |
|         | 62.2175706144204 | 90.0043438096205 | 95.1468654370952 | 109.25950270396  |
| HORMAD1 | 38.3418933808844 | 42.5269793679335 | 41.4613628725541 |                  |
|         | 41.6564075217517 | 36.8400213077707 | 38.9661430990729 | 55.1240750633045 |
|         | 42.0494116081998 | 41.1742244762318 | 40.1613888954735 | 41.2267153672559 |
|         | 40.7704587752083 |                  |                  |                  |
| HORMAD2 | 46.6348258763289 | 39.0102066700839 | 45.1569741609597 |                  |
|         | 40.4359177791566 | 39.0564222526273 | 39.4953494583071 | 41.3594868055879 |
|         | 31.4517139158876 | 36.5393857306744 | 41.8613406887824 | 47.4630625313159 |
|         | 39.7411455670172 |                  |                  |                  |
| HOXA1   | 39.1590964332473 | 39.1982470626863 | 44.825830634601  | 38.8495095797881 |
|         | 44.4031868028216 | 44.1737502492846 | 42.810624012519  | 41.4905114972525 |
|         | 41.0476065156912 | 41.1222709786153 | 41.6657053704762 | 40.4639532172338 |
| HOXA10  | 92.3307175266839 | 43.8336862998829 | 47.646800205189  |                  |
|         | 40.8211872708071 | 40.1047531921147 | 80.4404044229341 | 51.6869155634183 |
|         | 40.7752992161136 | 44.9580538951069 | 71.5345397102823 | 78.4289643729837 |
|         | 76.5758364080953 |                  |                  |                  |
| HOXA11  | 53.6741873729867 | 38.2263227947189 | 41.6079958749402 |                  |
|         | 44.9370339275041 | 37.5556299264699 | 53.8461734834857 | 59.1774824918359 |
|         | 46.1673159982664 | 51.1055541075029 | 68.4137459386155 | 82.0206083292981 |
|         | 59.0894921452893 |                  |                  |                  |
| HOXA13  | 135.567012693522 | 66.1288889125299 | 70.2577825186943 |                  |
|         | 42.8235313007746 | 78.9088042058577 | 118.899737794318 | 46.7100796279384 |
|         | 54.6067620335514 | 84.4938528830721 | 81.1925839235551 | 127.49459343016  |
|         | 123.022511916727 |                  |                  |                  |
| HOXA2   | 45.0283997415478 | 44.3977035913759 | 44.6032218589199 | 42.1273928203021 |
|         | 49.9493230064613 | 47.8029841385514 | 41.0381860307445 | 41.4508241771315 |
|         | 51.8396275386273 | 50.9506778292488 | 49.8783924642347 | 49.1718303518849 |
| HOXA3   | 39.512606833112  | 41.8566550719218 | 41.3755760434934 | 39.4652349255591 |
|         | 42.5449473689701 | 41.5083179498332 | 41.9918605927928 | 39.5466975353131 |
|         | 41.4636047919453 | 55.5206840401643 | 45.0985088502363 | 40.520044947212  |
| HOXA4   | 50.5670783769975 | 52.1967540852276 | 61.0370242377391 | 43.3078542962968 |
|         | 83.0497574039035 | 70.5025097213784 | 54.9765783642973 | 55.3122077514658 |
|         | 97.2425832658887 | 93.5511826850067 | 79.7691160370015 | 74.0913177754682 |
| HOXA5   | 190.130724966304 | 175.820979889343 | 360.342857415756 | 82.2766822827861 |
|         | 605.145228948011 | 326.055799445169 | 271.393858310441 | 283.111920665176 |
|         | 636.137048640939 | 1369.94743248835 | 645.702744916884 | 814.294297312057 |
| HOXA6   | 72.4966502412724 | 55.8678615468603 | 81.2136969156029 | 46.614092935749  |
|         | 114.093655272795 | 61.7091923488929 | 67.3976855661302 | 55.9303347977781 |
|         | 60.5608545741456 | 103.607345835114 | 94.8036856848998 | 77.1954301283261 |
| HOXA7   | 41.8409927585705 | 41.3610369241157 | 39.991353369336  | 35.2143190355414 |
|         | 39.3667161654772 | 41.9543948167375 | 43.1931731665131 | 42.357910063876  |
|         | 42.2577689927563 | 43.7303813515864 | 41.5421429082231 | 41.1554481567603 |
| HOXA9   | 115.691017747672 | 46.1797803908218 | 49.9547657591437 | 41.6564075217517 |
|         | 45.1137938810047 | 75.2337946941103 | 42.629412460409  | 51.1293275125104 |
|         | 46.4164127487052 | 276.399037769005 | 175.74424749223  | 203.946427426126 |

HOXB1 68.4352167527791 62.6984594468418 67.5417980425932 86.6411972262415  
62.5106969730855 56.3525213736952 66.0350709576651 56.3560498705517  
66.5298067946102 65.813547096222 52.104880481326 57.6860752168769  
HOXB13 47.6397712007919 38.4330755397458 37.5597671487621  
39.9697332660833 41.8806343997257 39.3841861812262 38.4005795891396  
43.7396619462033 43.8482802038826 49.3000844711116 48.8744644207821  
41.863927676552  
HOXB2 194.716672574835 129.605603092944 49.3780606970538 68.1992221684165  
50.0580547772867 62.9688525319822 64.232967574797 50.628152951493  
213.140641182603 49.4006068471301 72.0389007415456 80.6200293361016  
HOXB3 55.0078788655089 56.6146179789815 47.0055981216687 47.0874209746031  
37.8679241954337 40.3357777530419 45.3597029614942 38.5457716679071  
59.2566572428546 46.325232414659 52.6960621424156 58.2251348002272  
HOXB4 57.7877627794725 52.0268699306396 44.0451487108213 43.3078542962968  
58.4383854340181 48.8744644207821 52.2476631126873 56.4779645313958  
84.8235093165193 63.197604174872 57.8991270166934 67.9141812398066  
HOXB5 526.750242877914 142.03031230486 56.607199625498 45.5869891570251  
148.71330612986 63.3612993417558 66.0350709576651 138.349952332963  
200.41782363596 340.662853333208 343.591727067749 286.456276735451  
HOXB6 78.0586153423713 50.7487159427973 46.6025757239946 55.4180794172794  
53.6334631215581 50.2163892855092 52.9405267581903 53.3094843669564  
55.4553297468768 61.6670071424359 57.2437208536568 54.5468959212611  
HOXB7 339.679549262298 468.573956652904 140.369714831352 118.49449420132  
389.248080358801 151.99110418225 347.750020791938 548.217757366495  
837.959914510114 371.167168940365 435.325038193179 372.982648892131  
HOXB8 366.326747630465 60.8608693323868 51.6159542017038 40.9607305725196  
40.148780650831 42.8598805316863 41.5817737564592 124.051109959228  
120.123385036416 105.71315237465 99.432142513601 123.455270940015  
HOXB9 40.0557788909923 41.7337506166619 42.4580504587581 39.3750969348308  
45.3675390992851 41.9543948167375 40.3302268293707 49.7309743973184  
40.8970401536578 38.745552403895 38.745552403895 42.8864415494484  
HOXC10 43.4626049853157 43.5873188565519 41.9666541498638  
50.7046706880325 46.6397391251762 42.0574848021044 45.1017494688414  
43.2551508830106 42.5406888281114 40.8970401536578 45.0589947942306  
41.0657892043496  
HOXC11 43.6706764143908 48.8584917918986 44.3344900481112  
50.5310598656998 48.5000946421718 46.263826584899 41.9393838138203  
55.3122077514658 48.8842909466002 45.1569741609597 49.9338905397767  
49.7336769474446  
HOXC12 36.7356360093603 32.2892762042267 43.0016969050339  
40.1804147506786 41.9842695818285 41.8613406887824 36.9355798143571  
36.9355798143571 34.3842972343227 36.5806287103157 45.0589947942306  
28.3262844159644  
HOXC13 42.0532901689036 52.3187919317561 77.3367966395554  
44.9370339275041 89.1012752492647 39.4953494583071 47.7390230243778  
47.5950227477807 88.2639730639822 64.0162246399972 50.5810338885769  
38.5279745308203  
HOXC4 39.4250105372135 73.6855877240541 48.9720399485413 46.3203995372658  
56.2305155589239 39.7394181011603 45.3597029614942 42.5435283762933  
44.4395580493118 40.5090849993014 40.723990462047 39.7411455670172  
HOXC5 37.4554876386402 40.148780650831 38.5045333213784 45.334106390212  
38.3561682218911 40.7616966228404 40.6750540874299 40.047314525032  
37.2810767789306 42.6793753550854 44.2142581488029 39.1553169409075



HOXC6 66.603126065489 85.4437963805637 41.9363480239047 50.378948785456  
99.1952492360239 59.4309046716701 47.6810611485413 96.0126406688619  
125.209476374199 47.4356803320662 44.4414964828926 51.4466290643537  
HOXC8 51.7607563002005 62.0908175930716 46.3411353377615 47.2009420656854  
155.956315815754 68.3234331335073 48.8319884367456 70.8749669449099  
89.7862835647016 46.0119912782855 42.911855821602 48.9733758107788  
HOXC9 38.957687788868 54.1773909134233 37.7384958256497 36.264823544143  
45.4751076037511 37.1317006162938 37.2892641289258 58.676230030835  
35.1155486926999 39.4710743516517 32.6463318577756 39.0536056496869  
HOXD1 38.6454098044474 112.250150357875 160.134344197725 42.8235313007746  
169.194312808717 61.1022920882065 78.8250642061439 45.2806199505029  
145.936763882526 318.369837408344 236.536058101486 307.754078087321  
HOXD10 43.3638918705225 40.716553247236 46.9040704638073  
40.7481155008596 76.8964050504238 39.4953494583071 36.7356360093603  
39.853866204927 42.2577689927563 42.9866214102525 43.1931731665131  
42.0424641526302  
HOXD11 35.8208542506595 39.3999056968598 35.2101597814352  
37.9875302985336 61.6452971581503 32.771863438151 40.2154497375715  
38.956280281655 53.9287524861617 42.5664883002833 38.5668610487033  
35.9604262434141  
HOXD12 63.9851732498913 64.5845827915699 74.6901522573522  
73.3725472767369 64.4999048115671 151.522338087219 66.8475050031365  
62.6386437936516 77.6496445815897 82.966263655525 70.6138659908885  
65.7853960266587  
HOXD13 86.0796981361148 60.2547250212462 64.9072331703985  
84.4422623834916 73.0433648756396 61.1022920882065 94.5644670313964  
77.0262811825953 80.5437011468815 68.0556717366572 64.7598303406649  
62.4743608775767  
HOXD3 48.1125722136997 54.7855575216687 72.6731815563159 56.4578213622965  
72.828269171954 47.2927436772465 66.0350709576651 56.5914743235484  
60.9594847577747 62.2025996860055 55.2374601141719 53.3059058105836  
HOXD4 44.3355304829989 52.3187919317561 55.5567699051046 43.6726153508978  
78.1275793755619 45.9266745571724 76.3583555666815 49.9332280449549  
57.2716485658185 38.1042454705119 43.5710871617107 43.3744503319109  
HOXD8 38.6454098044474 42.1607322031054 42.2577689927563 41.4273122914951  
43.7517118200398 37.4782441311626 44.7255207589606 40.4359177791566  
49.0986627051784 44.2580151149956 39.6403089864678 52.7530873093837  
HOXD9 40.4639532172338 42.7775752471711 57.8111054584154 41.1886975241176  
47.2074332636566 41.4508241771315 42.357910063876 46.5717043290731  
46.9739160257217 53.1993028936883 43.4709415392696 46.2625470410195  
HP 49.3463416794995 38.2263227947189 42.8270038153139 47.2009420656854  
41.7929491793697 41.9543948167375 37.4772922422734 43.4544762830742  
40.8970401536578 45.5776159432079 40.4504608195666 49.2064066614865  
HP1BP3 65.7587943905649 84.6158251687884 86.500678864429  
55.4180794172794 105.187381311145 89.8567957512307 85.3227908896318  
108.838406710326 77.0703146713865 51.9547984751408 55.1099824417989  
87.5759422500374  
HPCA 41.8409927585705 47.4740726032707 38.7745734037492 44.0451487108213  
47.4548471240051 39.4953494583071 47.7390230243778 42.5435283762933  
44.1519466943185 41.9666541498638 47.8988096575648 40.4639532172338  
HPCAL1 445.421601813221 162.993316022946 191.09175268141  
326.357036514613 262.865950409375 189.164097331837 267.427827956058  
422.104447912999 150.480087842118 111.803238196297 127.676574457297  
97.5104526799755

|        |                  |                  |                  |                  |
|--------|------------------|------------------|------------------|------------------|
| HPCAL4 | 33.8558232866797 | 38.0226905622357 | 37.7384958256497 |                  |
|        | 37.1894304543751 | 32.9756367838345 | 52.4351670989268 | 42.2577689927563 |
|        | 36.2539950294089 | 39.1790517315259 | 26.6357008041456 | 37.6484782516569 |
|        | 39.5418280570561 |                  |                  |                  |
| HPD    | 45.2875173643252 | 35.4484652445078 | 46.8267540220952 | 47.6687908290818 |
|        | 46.8674366115656 | 43.3785777889265 | 41.5817737564592 | 40.047314525032  |
|        | 41.1742244762318 | 43.0919221375514 | 46.7386599624801 | 44.6484005362281 |
| HPDL   | 38.957687788868  | 44.4411734611229 | 48.4890615340603 | 45.5869891570251 |
|        | 101.086264355915 | 44.9896851005259 | 65.644767142472  | 39.7509165247419 |
|        | 36.3649677956953 | 43.1839109702714 | 41.7272875295469 | 42.357910063876  |
| HPGD   | 46.9939712192224 | 2488.32876359853 | 901.793120584383 | 117.071280682786 |
|        | 303.458085392002 | 406.668753694984 | 222.336600180634 | 330.241189572237 |
|        | 1027.59400018637 | 583.690350347288 | 672.515393219419 | 1214.73798692268 |
| HPN    | 78.59966540743   | 44.4411734611229 | 41.1860481368243 | 43.0001432913058 |
|        | 55.1563703466328 | 45.3205181880004 | 44.2688720583707 | 39.6833800000587 |
|        | 39.0775870687758 | 42.4301183791899 | 40.9624000010053 | 40.2669497398702 |
| HPR    | 40.148780650831  | 38.3322849790657 | 41.9666541498638 | 42.2496337895968 |
|        | 42.269054475455  | 51.5522731200852 | 39.5496902678788 | 41.8417024632349 |
|        | 41.4397539024976 | 41.4659679379482 | 41.9495387255163 | 43.5420658412177 |
| HPRT1  | 292.247095517604 | 287.689260887067 | 363.215063520042 | 274.962689159729 |
|        | 418.810270137243 | 226.057278804077 | 340.553073657744 | 211.019451518444 |
|        | 588.247843264181 | 96.7422527189063 | 117.689172019617 | 266.702252514277 |
| HPS1   | 66.8920765290571 | 63.9743186148507 | 79.9161139112432 | 74.9113162056974 |
|        | 61.2070368742244 | 53.8461734834857 | 65.9703614596867 | 56.4506749914215 |
|        | 51.2066664465185 | 52.0231832690887 | 59.3379918468928 | 57.8863370356541 |
| HPS3   | 83.5069968129733 | 123.281175151414 | 91.2769094348604 | 86.6411972262415 |
|        | 89.6313467455698 | 81.5782824513693 | 82.6381941930783 | 59.6720198281342 |
|        | 100.294952875307 | 58.5087296620514 | 65.2295773603116 | 81.3082994649699 |
| HPS4   | 49.8278140263915 | 49.1054636573278 | 49.0720076433727 | 42.8723769353017 |
|        | 51.0724630072723 | 43.3785777889265 | 46.4944619663072 | 44.2159020605784 |
|        | 46.1579366516298 | 46.8954576545929 | 45.1432412071268 | 45.5265270192861 |
| HPS5   | 72.6450859740011 | 86.1924491308234 | 83.0262409967927 | 221.354588127022 |
|        | 76.4580830432622 | 92.3477214133335 | 72.230225336191  | 68.6199296680241 |
|        | 74.6277165793069 | 77.8620267163666 | 81.1350396749303 | 86.4937293696262 |
| HPS6   | 316.548339196872 | 500.313640131475 | 459.737628144571 | 272.11060969089  |
|        | 428.206419080492 | 247.007210336963 | 496.791391622565 | 228.660261263355 |
|        | 336.159430045964 | 338.000998124097 | 318.846373031568 | 218.217851814655 |
| HPSE   | 48.4459451445651 | 42.9887069977696 | 44.2405728317107 | 101.46584765758  |
|        | 44.4489662507893 | 42.6575535390785 | 42.2577689927563 | 45.4882438975269 |
|        | 41.5296458719756 | 41.9666541498638 | 42.7775752471711 | 41.5536168238478 |
| HPSE2  | 44.8914371498528 | 40.0527893189096 | 37.8386378737561 | 42.6913548400127 |
|        | 40.8873907150245 | 42.8598805316863 | 44.0687697278114 | 43.1567024035183 |
|        | 36.7267557061938 | 47.4767851750188 | 43.5710871617107 | 44.2527566343661 |
| HPX    | 48.4849194706125 | 43.0227387991135 | 41.9666541498638 | 43.3078542962968 |
|        | 40.9950639693255 | 42.4580504587581 | 43.3262148375525 | 39.5466975353131 |
|        | 42.9020321355927 | 42.785429206422  | 39.3667161654772 | 39.8497227447888 |
| HR     | 40.9141850646578 | 38.9338521051669 | 44.4311655729487 | 37.5764485234171 |
|        | 39.7210115145672 | 38.385865183581  | 37.3508690072156 | 38.7864161493321 |
|        | 44.476519804187  | 41.2276963324981 | 42.5864346233886 | 38.6454098044474 |
| HRAS   | 64.2690842803282 | 147.405190988088 | 152.72007888133  | 68.3157692917711 |
|        | 112.100074154279 | 84.8694815443111 | 122.23209417744  | 83.9760574088975 |
|        | 191.454637685756 | 170.901596796384 | 134.567947469561 | 117.934830767297 |
| HRASLS | 46.8141313516997 | 37.3634897565502 | 39.5450079747895 |                  |
|        | 45.4634652319753 | 56.9360840563854 | 40.7616966228404 | 56.0515443021293 |

100.813818453306 42.0621425894624 48.2596564318071 42.2618615571566  
 41.0657892043496  
 HRASLS2 34.4896350146096 39.6123051184545 41.6977706798234  
 33.9645433044281 43.5544347011646 42.8598805316863 39.8695929627783  
 39.853866204927 45.2897806651929 37.920964499903 33.8558232866797  
 41.863927676552  
 HRASLS3 463.022816882856 148.458171821142 252.280105035425  
 275.096637886925 437.411540294212 673.002926695262 820.147156401172  
 2424.0414102425 213.261004438127 319.043862813161 410.808988840343  
 404.356143472409  
 HRASLS5 38.2083710281545 37.6383530120621 32.9174234020987  
 38.6414316877471 31.098971689775 46.8954576545929 36.7356360093603  
 39.9576138799997 37.8319142847141 38.6454098044474 37.2018803984555  
 35.4484652445078  
 HRB 48.3451401499671 59.7686826549947 84.0785633788363 70.2541961995753  
 63.955655956484 63.7963501146829 64.4736987797413 44.6560353921013  
 55.2485665256307 47.0055981216687 50.0808824383821 54.0733528420802  
 HRC 52.310270746917 47.5647821785529 48.7039705048129 42.9358255168086  
 41.0885562160946 59.5979861826984 43.0930293831497 54.2877981508636  
 42.992884918158 43.9450023643394 45.1432412071268 41.6550823405646  
 HRCT1 38.5648843914189 43.8495248991589 44.2405728317107 39.2780515621926  
 39.4693871570028 55.7197525213035 38.6243997507646 40.831207953647  
 42.9020321355927 52.4351670989268 94.5111909776371 48.7814131120945  
 HRES1 36.3649677956953 41.6466169548846 41.528370959196 36.5393857306744  
 32.2133093774284 36.6996187567892 36.634024014558 38.4540849632254  
 36.8127605061228 34.9138625012006 37.5583886316038 39.0536056496869  
 HRG 41.3785995857154 41.159706131351 41.8751578329365 46.0905079010237  
 40.3021896270845 45.3882138838137 41.0381860307445 41.8417024632349  
 38.6510172759977 44.6918600441328 42.7775752471711 41.1868052124344  
 HRH1 54.5358897781765 43.683792219729 42.7303139017786 43.4410741327254  
 49.32293280121 47.2927436772465 45.8980298854198 43.1567024035183  
 50.4974478884077 49.5265949137207 51.6414075056938 54.3587260982091  
 HRH2 34.9138625012006 38.5252456306656 40.5734458834617 41.5464765641928  
 40.6723334103791 37.5887129572848 42.357910063876 38.3684202018524  
 42.357910063876 34.4875013487777 41.6336636285875 39.5418280570561  
 HRH3 33.8558232866797 37.10170285405 37.9482157381008 43.3078542962968  
 45.8051846088552 39.3841861812262 53.8687221233237 50.1833483241864  
 43.9450023643394 35.195364621675 44.8872784170036 42.6758568421347  
 HRH4 44.436995101921 40.3384318592985 45.3974838013476 44.550322123994  
 45.5809132232681 40.650742261428 39.7576136507593 45.8669209716694  
 43.5669306063196 44.6918600441328 45.7328341667151 40.3691324547049  
 HRIHFB2122 61.9504984796308 71.2370255410834 88.6771566133367  
 52.5307002738469 66.5187917407182 93.3718038663074 78.0020909283414  
 58.5406981871153 94.5186910848217 56.4553747079294 62.2200723764909  
 59.6757573886627  
 HRK 52.109723558511 42.4493032770053 39.1799070031819 46.8954576545929  
 38.8456942580061 37.4782441311626 38.8417151851134 39.2672712041774  
 39.7537274655115 32.7131023641972 38.4689132737495 39.5418280570561  
 HRNBP3 35.3227485563945 40.5400384479766 33.6816578730693  
 35.8472302065546 41.0885562160946 46.574682061365 36.4098694708483  
 41.3506832276112 37.1820543575123 40.5090849993014 37.9946685306274  
 35.7451401627836

HRNR 48.3814421939888 36.89524015739 40.0998167098057 39.5050383901884  
45.1137938810047 36.2015763253919 39.8695929627783 45.5581356216957  
44.2607789091176 41.6373771565199 42.170702295259 44.4475838947656  
HRSP12 121.204795052893 118.619819027443 107.827560253663  
87.6763065012524 195.205980592503 108.168107241759 251.803102904399  
67.5206810636627 91.3362264594431 66.5976612069354 72.9488994273323  
111.607814098243  
HS1BP3 126.302564098322 103.569150754726 87.104092810486  
159.248015095017 118.806070800059 157.020685801527 173.819948756127  
333.566613571224 121.036604456449 232.628747594691 193.897678586782  
121.696160351886  
HS2ST1 50.7390160399184 45.8669209716694 44.4311655729487  
45.4634652319753 46.6397391251762 44.3648993568405 45.3597029614942  
49.3880946790306 49.3780606970538 44.0409178714232 45.8180710486329  
46.0633179231318  
HS3ST1 76.6868184563568 270.600852806342 219.878589678991  
74.2429851177794 104.486555491331 64.5187138759372 114.755820699611  
175.909221705119 106.97432416825 152.467040827584 168.897476166126  
185.165420581989  
HS3ST2 128.13619758592 45.8669209716694 41.0356368374708  
371.513106715598 47.2074332636566 62.0660509811111 50.3519150282938  
56.2441895183416 46.7760357462635 46.1390887492649 47.299647867533  
50.4847465816184  
HS3ST3A1 206.261432452217 78.9203273221608 47.4740726032707  
109.310200749289 45.4751076037511 46.7800033479223 42.8684958525042  
49.7309743973184 46.2027193115397 47.9056710878325 37.1059647239814  
43.7672102682067  
HS3ST3B1 44.8914371498528 45.2556760873335 41.1367478979484  
39.2780515621926 53.1884505015411 47.6803619768589 46.3057385979341  
46.1673159982664 48.5792058061372 42.8936990772838 41.9083581529276  
43.4709415392696  
HS3ST4 34.6977013306396 42.3550738181144 39.3709357615493  
41.6564075217517 38.2496050953547 39.4953494583071 34.6720534245631  
38.956280281655 37.0126425326534 37.920964499903 41.9083581529276  
42.4607795638552  
HS3ST5 43.3638918705225 57.2231446406982 41.8751578329365  
38.9534635879195 40.5710637884029 36.2768299545794 36.9355798143571  
46.695848687694 41.6616444147804 37.4302011516587 42.911855821602  
40.4639532172338  
HS3ST6 54.3554233228353 43.7644428186265 45.8844325913247  
38.6414316877471 40.0599807618105 44.4619248757502 42.1607322031054  
43.9366081640576 45.0017158586743 59.6863210839828 63.9029785089421  
44.1452943804044  
HS6ST1 48.8941062980393 50.2163892855092 46.8267540220952  
51.3851157261451 59.8102324370568 55.1987351219665 39.0458123429605  
49.3880946790306 60.7480970026669 44.571915452417 43.6629145624937  
48.5123041297835  
HS6ST2 45.2875173643252 89.0642206299985 40.7952353240579  
39.6609238036815 100.066535982734 43.6960408897486 43.5898425390297  
51.7866317456986 54.2089559589959 57.6234624694326 50.5566644722643  
57.764015576249  
HS6ST3 34.8099089553046 42.6939394537076 39.1799070031819  
40.8681871019812 40.9950639693255 40.7616966228404 43.5627649099623

41.5464765641928 42.8036731479932 43.6033221838149 42.170702295259  
 44.8372404608604  
 HSBP1 1077.94530110976 844.431085166353 760.745188431719 631.110081413363  
 663.904584382358 749.825513359683 1221.31634960736 612.843402058384  
 1055.69506483576 789.231011942098 802.650020720921 932.849256536912  
 HSCB 166.188557509096 99.7361599442168 134.394743648475 166.717256080341  
 120.92335773864 160.171133984141 182.643498505575 168.926743047741  
 125.383837024985 191.253860976433 182.757684959879 203.946427426126  
 HSD11B1 58.4394991753791 55.4452315601595 49.4573631027613  
 132.997204273031 93.9708162269401 82.2266112813039 44.14228771963  
 57.51482768194 43.6177016821274 86.7076796107636 63.1566669782858  
 80.5437011468815  
 HSD11B1L 57.50915811428 56.0477607422828 70.3613168347492  
 46.9919960628953 78.7320333941149 62.1448806673973 64.3340477503529  
 62.9922928277769 59.7044210110693 74.5282276561826 74.6847594297153  
 65.4435809676217  
 HSD11B2 72.4966502412724 57.4054069675016 56.0477607422828  
 37.0732977341185 50.0580547772867 47.2927436772465 76.8788592884109  
 340.20879802231 62.275808835675 54.4825201506931 50.7903824729818  
 44.0451487108213  
 HSD17B1 43.6706764143908 59.4908919662362 52.1242102345408  
 35.9521941716188 56.0477607422828 46.263826584899 86.7968607218397  
 76.3509533017572 49.9162522057712 46.5650556481721 44.4688999098904  
 47.3992733452821  
 HSD17B10 175.632783805966 198.922575188741 172.070926124844  
 190.442443946259 202.751918610777 220.192552354287 248.355842321304  
 178.123995338196 322.109212713082 124.815448107572 117.439175394651  
 139.472956453414  
 HSD17B11 90.0288824434037 294.220232101389 154.911548311992  
 194.079940066252 142.03031230486 213.309547409053 104.059057437473  
 195.58977358589 92.526038865874 81.2992152187529 94.312912693545  
 145.630337418553  
 HSD17B12 317.777971035617 542.069156178791 570.204236909398  
 532.043503787542 327.912730756303 436.757445186987 277.5073518536  
 418.410951118141 418.410951118141 312.648013979436 418.810270137243  
 579.482255191456  
 HSD17B13 43.1805016690297 42.9358255168086 40.8420925848403  
 39.4569929845912 39.512606833112 40.8970401536578 40.2601451506332  
 39.1128725343972 40.137818555383 42.6793753550854 40.8681871019812  
 39.9519547348106  
 HSD17B14 84.0388582916959 76.7710944291287 82.2766822827861  
 191.896416838806 81.4621222177298 160.080366694799 112.805898501551  
 80.4577725550904 54.8946088631931 159.147713331732 151.472676874224  
 114.935101645207  
 HSD17B2 46.441301934328 682.479411898549 629.763102939071  
 42.9358255168086 263.330471155421 54.5952754712007 307.974082654351  
 232.402174615698 383.705244574204 359.889643461047 577.276184555955  
 1127.96214301065  
 HSD17B3 53.6741873729867 41.3610369241157 43.8495248991589  
 41.5464765641928 41.3755760434934 44.4619248757502 41.5817737564592  
 43.7396619462033 43.0930293831497 39.7835513496873 41.1638563416981  
 44.5432192783161  
 HSD17B4 627.914461428624 571.992675891226 975.02086340962  
 683.75696650704 481.145001682177 429.854222129819 635.52621743309

644.368005872231 784.951880532127 1047.33749100342 1149.02954135912  
 1130.2486883492  
 HSD17B6 144.063191647372 67.0402749076279 48.8941062980393  
 45.5869891570251 60.0736861987141 309.198075383525 55.4004611309636  
 54.3820590274321 45.2897806651929 162.272853632419 145.01315947031  
 192.732356915298  
 HSD17B7 2678.43227619157 1208.33498233518 1320.7894611262  
 1598.78859278229 875.139073253298 812.386878774445 2013.08489754172  
 3818.71752181269 1102.03940742413 3099.21690111993 2878.82618761804  
 2077.74475301595  
 HSD17B7P2 44.5282181324797 48.2220547806679 48.2883694323339  
 45.334106390212 44.6834648302383 34.3887641786747 46.1634822993009  
 42.7431359850339 50.9010149857308 39.7835513496873 45.7328341667151  
 43.8575940017119  
 HSD17B8 76.4637616585578 97.712117589297 238.819980744789  
 97.3870880869036 96.143327683221 160.336517310154 103.118579484715  
 102.49785018292 175.378964448101 117.746495007818 153.673219460519  
 156.95090716929  
 HSD3B1 42.8036731479932 45.9266745571724 42.4580504587581  
 49.3654837541353 42.3685136297603 38.5252456306656 46.1634822993009  
 53.838484549134 43.2761454096265 40.6022003765153 36.7283081422707  
 39.8497227447888  
 HSD3B2 36.8072833828297 40.716553247236 36.3604951341921  
 35.8472302065546 40.8873907150245 42.4580504587581 40.5585676679482  
 41.4508241771315 37.4540772310118 37.3179578037963 41.9908237694988  
 41.7575097298927  
 HSD3B7 446.491994276469 55.9644250454789 113.367264677544  
 179.322661675979 62.9553576299033 114.526825145076 45.1017494688414  
 245.960009147234 54.7966692984192 104.409397223301 74.0420372528779  
 88.3636380348802  
 HSDL1 84.9075858560758 84.8084949516218 91.8533850418261 70.2541961995753  
 61.1216330559316 86.915098846441 96.5030525416431 76.0709828871754  
 78.3542840447759 85.9910479975356 90.807818984128 74.5886835786452  
 HSDL2 92.084526929319 163.946447772618 93.9472621843566 113.783910320605  
 155.050936910986 274.134201700259 437.411540294212 213.162949250252  
 197.813848976726 306.487935692954 301.941928552396 319.092568066532  
 HSF1 52.8427643366617 61.1022920882065 46.4569566520107 40.7481155008596  
 49.9493230064613 44.0804700754786 60.7992483126292 37.4484310268909  
 62.7977686460693 43.844855336215 52.5154971256566 46.0633179231318  
 HSF2 85.6170780640867 90.6852012808762 65.2670315837785 64.3746985855249  
 59.0965219753805 95.8905266177905 84.7782034884529 76.6868184563568  
 81.0169370911764 88.2056147099779 85.6989061660348 104.704892803169  
 HSF2BP 60.2547250212462 51.119812302881 52.8041782638549  
 56.0794100106654 91.9685593100867 59.0686629877982 74.9059650336395  
 53.6210959113222 76.7820250461545 53.4109882045447 49.532546810992  
 44.5432192783161  
 HSF4 45.334106390212 47.6629888215036 77.6385786739426 37.0732977341185  
 41.8441156763056 48.9393675671956 39.5496902678788 40.9861485852278  
 47.798305839406 39.4710743516517 45.5707650534259 42.8864415494484  
 HSF5 40.4639532172338 40.0145811166794 34.9849896310235 41.0219290963778  
 41.1507980856436 34.8179347896484 41.7614975630362 39.6474008369935  
 39.6609238036815 43.0177448037924 40.2317542073211 37.6557714476853

HSFX1 37.5100503181769 40.148780650831 41.3366779545815 43.074472921841  
42.3685136297603 43.3269087731399 41.1507980856436 47.1345949868029  
44.0519245668737 43.6033221838149 42.5864346233886 44.4951343330035  
HSFY1 40.018129854 39.932537801639 43.8153459269057 36.6062356000449  
40.7273974755431 44.0804700754786 44.9863726205428 41.4905114972525  
41.863927676552 37.3179578037963 39.4410515050885 48.7226309877005  
HSFY2 40.2945586900975 43.5605449153511 37.9951997351435 43.3701335735446  
39.3124560362182 38.8668526610189 42.0605906240248 40.047314525032  
40.137818555383 38.0436833784139 38.1318121140453 38.4774616639726  
HSGT1 53.6741873729867 68.7826057564876 57.6371756925687 67.474556589181  
64.7488184936482 80.2112932898502 75.287377665837 48.272324215504  
101.681822254799 56.057906531592 68.4261608261522 62.4743608775767  
HSH2D 50.9381343674699 145.193498675059 107.309776354951 149.792346524401  
84.2158827857221 51.9421032049606 84.9182861692273 116.184007615285  
87.3468807607655 97.7620313090597 93.9018973330737 81.7566533443175  
HSN2 40.8681871019812 38.6414316877471 46.2625470410195 42.1273928203021  
41.7929491793697 45.3882138838137 49.3854238365325 46.8954576545929  
52.9482338979681 43.1839109702714 51.524711857679 50.5511827666954  
HSP90AA1 2405.8635632802 1501.67042548971 2126.41018877615  
1559.50766982801 1102.03940742413 1598.78859278229 2009.75680599899  
1975.28674300761 1810.67209360676 2164.51925341969 1939.66920192372  
1868.51164332659  
HSP90AB1 4128.92158369026 3296.66056024983 2755.23573327276  
1159.77262479002 3296.66056024983 2196.59044510709 2237.08790397818  
1448.17151189672 3010.38998829232 2474.22199172028 3296.66056024983  
2374.1766901821  
HSP90AB2P 38.8336427948187 41.6069493017095 41.528370959196  
38.7879667686732 41.7426502114261 38.7578265341627 36.3604951341921  
40.1474543172332 42.5864346233886 39.9519547348106 40.6723334103791  
38.4829727716328  
HSP90AB4P 46.0920218698606 43.6587492470348 37.0642268327439  
38.6835649080278 51.7495306734657 39.066284740632 42.629412460409  
46.0106098064475 46.6944238390932 40.8970401536578 39.3086414047188  
41.9430737035925  
HSP90AB6P 44.9896851005259 45.3486182278177 46.6588655218735  
42.9358255168086 45.8051846088552 45.4882438975269 45.1017494688414  
40.7311497914871 39.9444191873552 43.401782064778 46.3370338074996  
43.2776458914333  
HSP90B1 1718.44944271916 2294.75523373329 1907.47560253019  
2966.53151444114 2733.80542760533 1445.73674428909 2331.12401106076  
1221.31634960736 2374.1766901821 1161.71671016964 1012.91803181784  
1789.07186722972  
HSP90B3P 37.0320432433314 41.8073910693411 40.301483914446  
42.0102671859606 34.9062568194127 35.9305494063137 41.4742337714895  
43.2551508830106 41.2870505273664 42.6793753550854 36.6298807161755  
42.9887069977696  
HSPA12A 60.9710783023013 45.2098033805679 42.8270038153139  
53.4785152499923 47.3791873993182 91.1707965298745 40.3622285487287  
56.2441895183416 44.5678064264717 92.2095095678497 71.8613906497084  
70.3935694362568  
HSPA12B 97.4769942713663 67.8999127712557 77.0301627655229  
93.6212502203405 47.5647821785529 157.250548147161 43.4544762830742  
55.5578334877425 41.6616444147804 104.288073521816 86.0100701849272  
59.5875857071693

HSPA14 119.095094052197 153.595112580363 159.827302305842  
149.426965431854 187.982920458868 144.954155897343 220.36831243882  
125.786923817078 218.958199087236 94.1575209300592 96.1307490576512  
111.071209057746  
HSPA1A 621.012072500314 430.283061862756 976.566026758227  
963.224016480187 143.679866958604 1068.10627239579 1064.35745220225  
107.971806573919 56.3441077510744 1107.96086673001 1255.10866316499  
671.458899624447  
HSPA1B 4503.77675488367 2374.1766901821 2146.1548633579  
1247.50618540769 6606.35767508139 3546.97585966225 3575.78813099057  
857.509349403807 2184.70038900784 2323.81110653289 2791.75465171135  
1226.43929953115  
HSPA1L 61.8529316708431 56.0477607422828 52.6275131390249  
72.4834467838798 56.8307116636372 60.7488007939604 62.9165938167938  
45.3872406432794 63.1944558106132 72.2443746456494 60.2165699959135  
65.6213260281822  
HSPA2 76.6094442444074 105.34055372228 159.12163104195 113.051477801522  
154.551927302005 290.174315362911 84.0691608193405 93.299474822664  
88.1910986077499 138.840039960639 291.086512261106 179.629622763381  
HSPA4 207.710354513208 169.723009455614 182.188883821722 184.898658656843  
196.760671234837 127.986477405999 161.205086002542 296.842555066902  
236.307055572306 168.640033281185 143.357170805323 192.318724749487  
HSPA4L 51.9545473262296 45.3486182278177 40.1985790927248  
44.0451487108213 52.6922486991742 61.6219790276408 50.3519150282938  
42.4580504587581 48.8842909466002 51.3351387089044 44.7926323492519  
57.6860752168769  
HSPA5 406.33528162722 195.303781999387 142.769349424534 268.419751472464  
138.50445813694 220.36831243882 247.966757890598 162.181462827314  
281.688688268815 230.053744836012 159.393207489822 199.970127219451  
HSPA6 223.356945665761 122.0305509548 103.856444152519 883.06773454117  
313.046160403661 410.623529765253 179.994715581707 78.3542840447759  
65.1129635608639 61.9882398986333 66.0664586519214 86.1741504863717  
HSPA8 2621.65272077828 2892.02001412369 2435.70120719503 2559.659041589  
3099.21690111993 2096.51999792183 1969.8871504719 1578.32969650385  
2248.64628069362 1221.31634960736 1342.10592868516 1107.96086673001  
HSPA9 425.304961783517 313.711588658312 393.944898808828 291.64206171681  
354.861943266984 382.190644764853 271.961673480206 416.559486912165  
496.444080712528 409.554706384667 429.65084326307 510.82619253142  
HSPB1 1945.33618761041 2878.82618761804 6258.22561934986 987.427672417105  
4015.88651424568 3707.73750609316 2588.47871581066 4665.45637589484  
6555.04068292972 4632.08655821299 5387.08056045279 3966.51586153125  
HSPB2 80.8943070653517 54.4793574349739 57.0427273538849 78.9479233685889  
50.2163892855092 211.897320355251 48.3411413510851 53.6210959113222  
46.6944238390932 113.26670675749 118.467231612638 92.084526929319  
HSPB3 43.9309845324767 50.4022543872993 43.6670755115848 45.7397504535169  
48.1473938886239 51.4931742685391 40.0052661202207 45.1714698794331  
39.0775870687758 77.775644509079 41.9908237694988 85.9286114777649  
HSPB6 73.3950348855139 97.3066473777771 51.4308501933893 71.2572485987604  
70.0133734659853 1939.66920192372 39.7576136507593 77.523734787944  
45.0997987980157 924.316085565917 753.976423227915 742.726253630865  
HSPB7 70.3757673501097 48.3699741879723 42.9104454767916 54.6089451252049  
46.9906120932727 422.237766234202 43.3262148375525 60.7942162859036  
42.1594905198929 321.359569119182 339.52415679299 302.885979412198



HSPB8 102.863599315528 60.9755936952178 56.3471340054074 60.1837189855762  
52.8190882379316 475.310458821086 38.0598374201407 165.440751113862  
64.7116910405493 459.021889198824 372.982648892131 279.901217752341  
HSPB9 37.4554876386402 41.6466169548846 38.6727842796202 40.8681871019812  
39.4693871570028 43.5752393599169 46.3057385979341 38.3684202018524  
35.5220586859301 42.6793753550854 36.9060997041453 39.7411455670172  
HSPBAP1 95.5724734464786 82.1344514651393 74.0913177754682  
172.89937021234 125.503897988367 98.1701560122734 97.0155195562193  
131.67159377585 81.1416376689959 123.841740274811 91.4514026506253  
81.6458112867541  
HSPBP1 48.4614401417022 69.0975200641705 63.3006977162657  
43.6275678329783 118.748969134194 75.8331683850176 82.034818940429  
59.4188882103773 81.8426140611297 48.8044288137598 55.5313494549746  
55.9555622193202  
HSPC047 48.2910530887214 54.113533179847 93.1349769600388  
65.524821699432 63.8315840603904 70.2553917409773 46.7100796279384  
57.1362071277099 44.8997235283254 97.4769942713663 79.1922819549042  
60.8662233098324  
HSPC072 40.0557788909923 39.2907645923217 42.7303139017786  
37.5382094267692 41.0885562160946 37.5887129572848 37.4772922422734  
39.6474008369935 35.7973685350741 41.1222709786153 38.1835938174625  
43.4709415392696  
HSPC105 40.6559419616644 50.7487159427973 94.8260360398356  
43.4410741327254 59.3611824459962 41.2567470068038 58.8993834673475  
39.1652965788406 47.7086093893038 53.3059058105836 51.524711857679  
61.4366256816323  
HSPC111 114.666088291556 56.6927078228789 89.3568413748778  
66.9218519793499 135.344261822716 101.909225305064 73.6855877240541  
95.1037791424727 104.80882886573 67.1278109419819 63.5195937348531  
95.9391851122771  
HSPC152 535.799532339187 748.372940917543 834.14766574977  
633.819901764391 1448.17151189672 954.116675685628 1024.97546870349  
587.88126282119 910.898566308567 495.26603220907 641.462632112151  
909.843512894628  
HSPC159 55.6268253440479 67.8208976798364 61.9293105089291  
76.450993090133 72.6675345946258 62.5542376788358 73.4820932957859  
111.910324041953 64.4098139218465 35.195364621675 51.4413099192899  
47.8931773060789  
HSPC171 353.674963012657 224.945809325258 347.908556198025  
373.547403496629 116.540209248478 198.922575188741 349.767857026458  
330.391945158969 327.844083226326 228.907776306695 216.943972794603  
176.064476306748  
HSPC268 811.142611128461 488.908231529696 526.44841348248  
534.755211286733 282.764445883135 305.399644617845 625.805967352327  
1204.34388579291 403.243939813779 1075.04105984319 960.526372655577  
744.080606078086  
HSPCAL3 36.064718696392 35.0222940937513 40.7910160811527  
39.853175885492 33.0851917920412 39.7697110924474 40.9157352260901  
44.0736170668178 40.1738310955128 37.2089297656361 42.5023941254529  
39.4830039788612  
HSPD1 749.49934348018 783.440408023061 598.404003732481 464.99944459917  
997.492549573274 712.80113322987 723.210613328966 645.114504971255  
617.808073077341 450.972039573066 445.307046237791 851.813216452015

|         |                  |                  |                  |                  |
|---------|------------------|------------------|------------------|------------------|
| HSPE1   | 670.958499409833 | 596.84269596976  | 518.732175662818 | 373.802562320876 |
|         | 913.704049709264 | 454.939614583134 | 491.468862309918 | 478.296779356592 |
|         | 879.708199333257 | 241.278168450381 | 304.777565078155 | 821.013687795434 |
| HSPG2   | 48.5835484742456 | 48.7084357480922 | 59.8273072817267 | 50.0526763693329 |
|         | 46.9906120932727 | 53.565717255469  | 43.8206425661746 | 47.0940613507321 |
|         | 41.7627910693483 | 42.5664883002833 | 43.9450023643394 | 45.2783024981315 |
| HSPH1   | 453.652548085387 | 729.342532316666 | 562.258108316474 | 493.705301673753 |
|         | 1208.33498233518 | 480.386431986343 | 943.73554571528  | 425.026540236907 |
|         | 687.862452802453 | 449.564281713066 | 483.416873464931 | 1067.08316477623 |
| HSZFP36 | 106.219480656782 | 223.1171195512   | 141.784776736918 |                  |
|         | 82.7394574977114 | 152.608998839745 | 113.090530993447 | 257.506228440451 |
|         | 492.902027204364 | 212.436948565474 | 356.948763043851 | 243.672418126374 |
|         | 204.992039590717 |                  |                  |                  |
| HTATIP  | 49.7350276169552 | 56.0642694832108 | 53.3127618245672 |                  |
|         | 53.9517841438975 | 49.8304479381623 | 56.2229687620557 | 66.7750249658122 |
|         | 49.9951674107458 | 59.5093038629766 | 54.8979897528792 | 65.4493288628375 |
|         | 59.9174456081704 |                  |                  |                  |
| HTATIP2 | 153.61084474789  | 450.972039573066 | 471.874412428677 |                  |
|         | 367.808375988242 | 176.861690566909 | 210.22828395255  | 251.905799624693 |
|         | 326.055799445169 | 301.457545514208 | 180.63535336811  | 209.31241212773  |
|         | 326.121479451246 |                  |                  |                  |
| HTATSF1 | 41.9407041937973 | 35.5310164682026 | 36.0306975524309 |                  |
|         | 40.8681871019812 | 39.4693871570028 | 42.357910063876  | 40.0052661202207 |
|         | 40.2382908228517 | 37.9273653326866 | 38.3092241935352 | 46.4205654140754 |
|         | 44.5432192783161 |                  |                  |                  |
| HTF9C   | 44.6717213146407 | 45.620219291723  | 47.7737810047679 | 46.7577982595088 |
|         | 46.4343327861696 | 47.7086093893038 | 40.1613888954735 | 43.3838505886856 |
|         | 48.0163377492228 | 42.8414096678708 | 47.9269108813022 | 46.8129509799753 |
| HTN1    | 39.9697332660833 | 36.89524015739   | 39.4710743516517 | 36.3604951341921 |
|         | 35.5220586859301 | 33.895835691032  | 35.7055410599146 | 38.2782436497441 |
|         | 35.2143190355414 | 41.0057887014368 | 37.2018803984555 | 37.2810767789306 |
| HTN3    | 42.3620028137457 | 41.159706131351  | 42.2577689927563 | 39.1706564265495 |
|         | 41.7419877611072 | 42.6575535390785 | 48.739479557328  | 42.6913548400127 |
|         | 48.3119523820103 | 46.441301934328  | 41.9495387255163 | 40.716553247236  |
| HTR1A   | 35.2267149016596 | 38.7344853699576 | 38.3166554965434 | 43.8002456102021 |
|         | 40.4639532172338 | 37.8102105794655 | 37.9430145836712 | 40.831207953647  |
|         | 40.3316153483289 | 43.0919221375514 | 39.8184668132023 | 42.0424641526302 |
| HTR1B   | 39.0620487644635 | 41.554942319225  | 42.5406888281114 | 38.4208429103799 |
|         | 40.0599807618105 | 37.5887129572848 | 41.8315602975157 | 37.86982638952   |
|         | 38.9834959368496 | 39.2623423164488 | 39.153226699662  | 44.0451487108213 |
| HTR1D   | 43.3638918705225 | 43.9421822132391 | 39.0775870687758 | 41.7614975630362 |
|         | 40.6723334103791 | 45.1873487463472 | 37.3799542961839 | 46.8954576545929 |
|         | 41.3803269429468 | 39.3698811593364 | 54.7061116419212 | 44.8372404608604 |
| HTR1E   | 40.3478825593224 | 47.9128504683618 | 46.6588655218735 | 43.1847628331565 |
|         | 51.0107745412152 | 48.3686935595826 | 41.1507980856436 | 46.7980335276155 |
|         | 46.7760357462635 | 48.9826868640753 | 50.3221380889396 | 49.0655215909632 |
| HTR1F   | 46.5549623118323 | 43.8495248991589 | 44.5134109184888 | 42.8235313007746 |
|         | 39.3667161654772 | 41.0582900711341 | 47.2927436772465 | 46.695848687694  |
|         | 45.5779686360641 | 42.6793753550854 | 42.4580504587581 | 39.2469742642337 |
| HTR2A   | 241.706783147271 | 274.134201700259 | 202.833844963097 | 217.721787448311 |
|         | 408.353336724969 | 219.878589678991 | 156.917623325793 | 218.531478946522 |
|         | 227.206974078547 | 204.944787289897 | 224.871193467078 | 232.628747594691 |

|       |                  |                  |                  |                  |
|-------|------------------|------------------|------------------|------------------|
| HTR2B | 58.3702889417801 | 45.6533175604486 | 40.931294690669  | 46.0228732507872 |
|       | 42.1650127805175 | 46.0364000143537 | 38.941855825269  | 54.720204938924  |
|       | 39.9444191873552 | 55.4037482627222 | 50.9815930710768 | 42.4607795638552 |
| HTR2C | 37.1485601150873 | 39.5050383901884 | 43.1931731665131 | 40.4359177791566 |
|       | 41.6806984441849 | 36.5584787902344 | 44.0137388752186 | 41.7877325563821 |
|       | 47.27543600687   | 40.2493681589104 | 41.6336636285875 | 40.8681871019812 |
| HTR3A | 42.5506742787391 | 43.3030298816484 | 43.8495248991589 | 40.6857324478814 |
|       | 43.6782245625941 | 42.0902716047029 | 45.8381398279472 | 42.1887890806988 |
|       | 42.2331334096358 | 44.8997235283254 | 41.7614975630362 | 41.5083179498332 |
| HTR3B | 38.6454098044474 | 39.1982470626863 | 42.7303139017786 | 42.4580504587581 |
|       | 50.2163892855092 | 37.0180934800573 | 45.3597029614942 | 41.0381860307445 |
|       | 41.9635525160083 | 42.1622837416589 | 41.5421429082231 | 41.6550823405646 |
| HTR3C | 42.1537476443423 | 38.8336427948187 | 40.6737160001291 | 37.651298468202  |
|       | 38.4540849632254 | 39.3841861812262 | 34.4570158133896 | 41.8417024632349 |
|       | 36.7267557061938 | 44.6918600441328 | 41.6336636285875 | 40.9683275553869 |
| HTR3D | 43.5710871617107 | 40.2493681589104 | 42.8723769353017 | 40.3180310664156 |
|       | 46.8674366115656 | 41.809704036355  | 45.223075311113  | 42.0847226073592 |
|       | 42.6366765186182 | 41.2598458726002 | 42.5426057453993 | 44.293922970134  |
| HTR3E | 40.6559419616644 | 42.6939394537076 | 36.1042012504758 | 36.9912468186322 |
|       | 41.0885562160946 | 33.6859433472087 | 40.2154497375715 | 35.7973685350741 |
|       | 39.3750969348308 | 40.2112371512838 | 42.5426057453993 | 39.1553169409075 |
| HTR4  | 39.8163644409395 | 41.848202185821  | 41.437237454134  | 39.9084621723809 |
|       | 40.7376840028647 | 39.6251842352088 | 40.2504888274144 | 37.7612949798895 |
|       | 37.4040000342773 | 37.7705653029461 | 37.3404647796601 | 39.1807622935084 |
| HTR5A | 33.7777950030073 | 36.6968906669565 | 40.1985790927248 | 45.334106390212  |
|       | 35.6434124419782 | 38.8336427948187 | 37.4772922422734 | 43.1567024035183 |
|       | 40.7847110517594 | 37.5343260962758 | 38.8507804383261 | 38.4330755397458 |
| HTR6  | 39.7576136507593 | 45.7317208802318 | 44.3344900481112 | 40.9607305725196 |
|       | 41.8806343997257 | 41.2567470068038 | 39.8695929627783 | 36.8400213077707 |
|       | 38.5252456306656 | 41.7405682794166 | 39.6403089864678 | 34.6720534245631 |
| HTR7  | 40.6559419616644 | 47.0981389355244 | 44.8872784170036 | 41.1507980856436 |
|       | 49.0828761839116 | 39.6609238036815 | 37.6502409810897 | 40.3357777530419 |
|       | 44.9645354363967 | 47.7800121097582 | 42.6366765186182 | 45.9104478407175 |
| HTR7P | 37.0320432433314 | 38.8336427948187 | 39.5450079747895 | 39.5050383901884 |
|       | 40.9950639693255 | 48.8744644207821 | 39.5496902678788 | 44.8997235283254 |
|       | 40.4997186069494 | 34.2638875325204 | 33.6080693875435 | 37.8490162439785 |
| HTRA1 | 4216.69417265779 | 1040.102982885   | 1154.6386362     | 788.950470077369 |
|       | 898.114119553014 | 2039.89728774097 | 132.903804194161 | 321.26586939039  |
|       | 411.184636774653 | 1129.19103016599 | 1144.34555072807 | 853.947671456736 |
| HTRA2 | 95.65872032796   | 74.7370458648253 | 94.5055588176321 | 97.6774247176874 |
|       | 108.525500270474 | 120.392561825049 | 114.056623754207 | 99.0202948657926 |
|       | 79.9391673512018 | 74.6847594297153 | 75.0704619826557 | 74.8706881113318 |
| HTRA3 | 54.931538325692  | 41.4508241771315 | 44.0451487108213 | 39.5050383901884 |
|       | 46.4343327861696 | 73.8105012820769 | 41.5817737564592 | 38.079222289614  |
|       | 40.4220196471124 | 47.611018474151  | 46.4205654140754 | 61.9036392303558 |
| HTRA4 | 43.515290338756  | 46.4569566520107 | 40.4882741869718 | 79.0039595317374 |
|       | 48.0234896130991 | 42.5193208629123 | 41.3594868055879 | 44.9977782988116 |
|       | 37.8319142847141 | 39.6251842352088 | 41.4508241771315 | 46.3411353377615 |
| HUNK  | 38.8561375693335 | 41.8073910693411 | 41.6079958749402 | 46.8954576545929 |
|       | 38.1644569189523 | 38.5252456306656 | 49.6872467499977 | 40.6171774724171 |
|       | 51.2066664465185 | 42.0621425894624 | 39.2542963855807 | 41.7575097298927 |
| HUS1  | 40.9141850646578 | 37.4181006952079 | 35.2838283525874 | 37.3600014814388 |
|       | 34.5301949364147 | 37.3799542961839 | 34.3842972343227 | 34.5592213228896 |
|       | 33.4698406117406 | 36.5352572191451 | 35.5179217192467 | 34.9138625012006 |

|       |                  |                  |                  |                  |
|-------|------------------|------------------|------------------|------------------|
| HUS1B | 55.5276281380084 | 48.0296332183129 | 52.2132783757422 | 54.8412943008635 |
|       | 50.2163892855092 | 54.0382756991549 | 52.561573697155  | 45.2806199505029 |
|       | 63.8740412329753 | 47.3791873993182 | 45.9104478407175 | 53.840976437122  |
| HUWE1 | 109.5145190042   | 69.3106426188075 | 94.0749342825094 | 75.2475238554276 |
|       | 79.5175547131776 | 79.2701322339022 | 113.692418102755 | 200.203393423652 |
|       | 130.455608913636 | 139.814194128548 | 143.693373312575 | 112.316483867372 |
| HVCN1 | 48.0201377454632 | 46.1797803908218 | 44.3648993568405 | 69.2963913574682 |
|       | 48.87875862356   | 47.0027453663546 | 45.3597029614942 | 38.132587347852  |
|       | 48.6494451061637 | 46.0119912782855 | 45.6706505553383 | 44.4067063477243 |
| HYAL1 | 43.1131704517186 | 47.2055133646385 | 52.7570461169969 | 50.0526763693329 |
|       | 43.2855454938964 | 59.217781407734  | 39.4916414839923 | 48.0211752672327 |
|       | 42.2577689927563 | 49.1928206164702 | 50.8826620053386 | 50.5962520938628 |
| HYAL2 | 100.159565926265 | 95.2996468986128 | 188.734299563005 | 133.365282773876 |
|       | 134.519244495139 | 93.2484615907966 | 98.0473811574767 | 63.0186614577099 |
|       | 123.729687262037 | 68.8167148906225 | 88.9189119296399 | 64.0985088513857 |
| HYAL3 | 51.7607563002005 | 47.8400694856726 | 59.7483827511172 | 74.2429851177794 |
|       | 112.721024337362 | 60.2083550387718 | 82.6381941930783 | 80.9092480872499 |
|       | 94.2678678253657 | 60.2877434874622 | 52.3761286517985 | 50.3118072462443 |
| HYAL4 | 43.3638918705225 | 38.0226905622357 | 45.989212296035  | 33.8111782249716 |
|       | 47.0954207417646 | 43.9724628401189 | 37.9430145836712 | 44.1311654985682 |
|       | 39.7537274655115 | 43.0919221375514 | 39.9899430628542 | 53.2046867327331 |
| HYDIN | 41.1801554437554 | 41.5094719913597 | 41.2656653454411 | 40.4792096791853 |
|       | 41.4473192663203 | 40.7166777560261 | 41.2092937200453 | 42.8006000954471 |
|       | 41.534060591545  | 40.1655646127146 | 41.4508241771315 | 40.2249301774382 |
| HYI   | 77.3752541676627 | 53.8499082625091 | 52.8041782638549 | 59.8102324370568 |
|       | 57.5685357492202 | 77.8490019489375 | 99.3797043236938 | 53.6210959113222 |
|       | 76.3790849853724 | 98.2843999216669 | 73.5788549535062 | 65.8959431201418 |
| HYLS1 | 85.5362566454799 | 94.0532777456537 | 70.56368853915   | 66.4047895961325 |
|       | 134.394743648475 | 88.6287852712744 | 113.692418102755 | 75.2101993995344 |
|       | 143.997817398894 | 76.3583555666815 | 66.2027948645675 | 60.8662233098324 |
| HYMAI | 40.6559419616644 | 34.7135536792489 | 36.3604951341921 | 45.0798408927912 |
|       | 39.2608760193011 | 46.8954576545929 | 47.2927436772465 | 42.157627240486  |
|       | 42.357910063876  | 43.4885245598939 | 39.2542963855807 | 39.7411455670172 |
| HYOU1 | 166.644251737703 | 141.808284719109 | 135.106756607914 | 164.312946712409 |
|       | 172.676819138152 | 99.5192591352063 | 144.227861902786 | 248.438376348617 |
|       | 188.750770811584 | 148.144200968432 | 167.578081645481 | 127.239392811099 |
| HYPB  | 43.844855336215  | 42.0709558258414 | 38.5045333213784 | 49.1786207920603 |
|       | 45.3675390992851 | 43.7630587657205 | 38.941855825269  | 40.1474543172332 |
|       | 39.3750969348308 | 40.6022003765153 | 39.5399188536544 | 43.8575940017119 |
| HYPK  | 1401.46625360427 | 540.037371261388 | 621.489785652602 | 796.359355922952 |
|       | 485.310097523194 | 435.325038193179 | 923.470702344816 | 2039.89728774097 |
|       | 566.77872642437  | 1744.56688411113 | 1670.01014610464 | 1163.0370991733  |
| IAH1  | 578.601842980701 | 361.945511835039 | 286.497342437243 | 319.659366973269 |
|       | 583.690350347288 | 532.043503787542 | 665.510487460287 | 722.514380928291 |
|       | 360.668308246913 | 242.751164798133 | 220.337850438943 | 444.618035487523 |
| IAPP  | 43.844855336215  | 41.159706131351  | 40.5734458834617 | 44.4367387274922 |
|       | 39.9697332660833 | 44.3648993568405 | 37.9430145836712 | 42.357910063876  |
|       | 45.1899271235974 | 46.8954576545929 | 41.1638563416981 | 42.9887069977696 |
| IARS  | 116.490154128114 | 152.555556133364 | 105.598516887691 | 113.248260252658 |
|       | 206.337508331566 | 159.667153030627 | 129.538159906075 | 94.1050519074545 |
|       | 136.272019225585 | 94.5055588176321 | 100.734145862519 | 156.02592319461  |
| IARS2 | 224.109805046747 | 306.578554914328 | 428.515605971056 | 225.088911324737 |
|       | 343.016541928592 | 252.583117397109 | 223.669853276931 | 292.156216736355 |
|       | 501.148339791372 | 250.993396750789 | 275.407306413402 | 439.376432049616 |

|          |                  |                  |                  |                  |
|----------|------------------|------------------|------------------|------------------|
| IBSP     | 41.7397731376692 | 44.0409178714232 | 43.1931731665131 | 38.3166554965434 |
|          | 45.5809132232681 | 42.5660695551615 | 42.4939802311136 | 50.7364620410977 |
|          | 46.0106098064475 | 45.6868589181768 | 53.6334631215581 | 44.8372404608604 |
| IBTK     | 168.492959515167 | 179.322661675979 | 132.985150338484 | 174.252441615373 |
|          | 74.0735632658567 | 151.775928080246 | 133.576489624155 | 173.357715186701 |
|          | 157.870937745052 | 221.450737998571 | 186.600931545083 | 230.649032296928 |
| ICA1     | 198.623556176842 | 238.205365476671 | 172.416351632442 | 141.364814429951 |
|          | 141.567299023381 | 84.5913809068614 | 232.147792636393 | 367.235521372008 |
|          | 195.672836308456 | 285.97627172608  | 283.643027929014 | 243.489225650886 |
| ICA1L    | 45.2875173643252 | 43.0829701603126 | 39.3344387353654 | 40.4893720023062 |
|          | 49.8304479381623 | 53.9517841438975 | 43.1696495767273 | 50.7364620410977 |
|          | 45.7226406704445 | 49.5542154724118 | 48.4916117779992 | 47.7596919358651 |
| ICAM1    | 33.8558232866797 | 40.2493681589104 | 35.0970060242246 | 37.7469621225553 |
|          | 36.5393857306744 | 35.8227939208521 | 39.8695929627783 | 38.079222289614  |
|          | 36.197424053556  | 40.7063426028871 | 38.2795150354677 | 42.2577689927563 |
| ICAM2    | 158.308338986864 | 270.756849919679 | 256.116479208201 | 390.331295238889 |
|          | 263.125290391542 | 404.599730419192 | 187.331614826395 | 99.9896394343368 |
|          | 194.225364352044 | 225.725485439572 | 341.142651038591 | 409.899024157206 |
| ICAM3    | 221.383645621978 | 330.037433174255 | 340.311633794489 | 1398.21942794938 |
|          | 317.560970617018 | 228.08291792003  | 290.524288545599 | 235.544416908354 |
|          | 203.729732499418 | 194.469250918013 | 148.043320937247 | 123.022511916727 |
| ICAM4    | 44.3355304829989 | 38.8336427948187 | 39.6451483836089 | 74.8706881113318 |
|          | 42.9090346219023 | 41.6590564937735 | 42.57175366709   | 44.0687697278114 |
|          | 38.1713217245067 | 42.6211340086915 | 46.3022643383713 | 47.4713070963518 |
| ICAM5    | 41.4508241771315 | 39.6995529770239 | 36.2683886571585 | 44.550322123994  |
|          | 39.7568367479301 | 39.7394181011603 | 39.7576136507593 | 41.0381860307445 |
|          | 34.7722083264266 | 36.2435874904689 | 37.9946685306274 | 43.2776458914333 |
| ICF45    | 39.9697332660833 | 46.0023068797812 | 44.6032218589199 | 41.8778873678551 |
|          | 39.2608760193011 | 53.4466111440611 | 43.9450023643394 | 50.0526763693329 |
|          | 51.5229124652769 | 55.5206840401643 | 51.4413099192899 | 51.2318935933116 |
| ICHTHYIN | 42.7150227340364 | 204.039190380778 | 166.608353896248 |                  |
|          | 78.1583955490018 | 177.334352189317 | 68.6424653037264 | 124.204392146484 |
|          | 154.482760264318 | 115.683762821211 | 330.737070535671 | 280.117410663595 |
|          | 209.794541970107 |                  |                  |                  |
| ICK      | 77.2218991550552 | 88.2959958615748 | 79.2250098540901 | 48.9386616209853 |
|          | 60.3481762331447 | 81.6949047529395 | 61.8571521441451 | 55.1933004802607 |
|          | 68.0010662646828 | 61.0935621637178 | 65.963892742019  | 75.0136718534495 |
| ICMT     | 133.981674663494 | 105.446338599737 | 107.251974803232 | 88.3459116251233 |
|          | 110.074666148474 | 124.751020763508 | 115.557690369703 | 105.1770711426   |
|          | 125.588228083829 | 99.1438953564062 | 96.2799270895937 | 104.928805304068 |
| ICOS     | 49.1868644496737 | 76.5411379733694 | 79.4998723172096 | 142.048367760597 |
|          | 43.4544762830742 | 43.4681646416585 | 62.1970616836737 | 66.1288889125299 |
|          | 47.0804681460898 | 41.7405682794166 | 46.0095710163378 | 43.8575940017119 |
| ICOSLG   | 57.1046180136491 | 57.6831182451733 | 48.6037684272115 |                  |
|          | 78.7450149191851 | 81.6486527718661 | 57.8005007012205 | 72.5956443098684 |
|          | 70.0697974278875 | 68.1674425673171 | 63.197604174872  | 69.8899273527731 |
|          | 47.5025821041537 |                  |                  |                  |
| ICT1     | 145.30915313164  | 143.590160385066 | 140.276520383146 | 109.144663527001 |
|          | 183.918927595056 | 130.953274536639 | 188.887559923238 | 145.335751135441 |
|          | 204.992039590717 | 90.9570747667407 | 117.234047261125 | 98.2074490157865 |
| ID1      | 168.345356470411 | 1963.91365010531 | 1900.96666834569 | 132.684895918889 |
|          | 813.242005949542 | 236.851068206869 | 1395.33665255999 | 287.981727851442 |
|          | 1645.71527614542 | 1945.33618761041 | 2393.42629339901 | 933.968759959712 |

|         |                  |                  |                  |                  |
|---------|------------------|------------------|------------------|------------------|
| ID2     | 243.952697457779 | 1127.96214301065 | 292.247095517604 | 410.257694738546 |
|         | 169.322551237636 | 759.566075437072 | 516.213108543512 | 886.397061577531 |
|         | 221.383645621978 | 399.66182195331  | 435.632247999054 | 209.61080762285  |
| ID2B    | 40.6559419616644 | 42.3550738181144 | 31.9895827886879 | 36.890925044696  |
|         | 44.147557390293  | 40.244271403831  | 39.7576136507593 | 45.2806199505029 |
|         | 38.0213051227859 | 37.920964499903  | 33.6902293666089 | 39.6352613956998 |
| ID3     | 444.471597593258 | 3055.1209535841  | 2405.8635632802  | 380.988918630713 |
|         | 993.626865290891 | 899.223276238109 | 464.99944459917  | 239.838643553139 |
|         | 579.482255191456 | 3010.38998829232 | 3465.3013599062  | 601.611039798626 |
| ID4     | 41.1523487516364 | 49.9085372049438 | 45.5883690965192 | 32.9879066304034 |
|         | 41.6806984441849 | 44.5544727111028 | 41.5817737564592 | 39.7509165247419 |
|         | 39.5806465938526 | 46.1390887492649 | 48.1352470945488 | 39.1553169409075 |
| IDE     | 59.220967994972  | 122.849949163123 | 102.87193290903  | 78.7450149191851 |
|         | 97.7153995525346 | 78.730129036128  | 83.8811735017279 | 80.7067505750848 |
|         | 89.4747568145717 | 59.9354531144375 | 58.4816190076338 | 107.440379066528 |
| IDH1    | 512.691506909762 | 1105.00321488322 | 728.679189702033 | 326.70962514228  |
|         | 679.309039810384 | 276.029709051798 | 1305.35453202355 | 2215.01815680371 |
|         | 1242.75259587926 | 608.005012673672 | 1019.67015337432 | 1097.92519921873 |
| IDH2    | 1184.18994044558 | 418.927102569912 | 229.379918828848 | 443.269396125834 |
|         | 435.209988251425 | 392.008276951929 | 1470.84169670955 | 942.991198007376 |
|         | 748.913487947791 | 399.027079798213 | 344.578407722941 | 312.469507672374 |
| IDH3A   | 130.261747462753 | 123.597489107285 | 82.6983700200815 | 144.239350177363 |
|         | 106.125117937458 | 182.079641528208 | 116.913991315353 | 99.1438953564062 |
|         | 132.473918053428 | 135.323750661937 | 139.945446129591 | 161.526970033915 |
| IDH3B   | 414.794323433931 | 403.428042132639 | 478.682734715193 | 315.696895080135 |
|         | 588.064524478384 | 494.733185937057 | 513.266895252699 | 296.664472126617 |
|         | 324.506136847875 | 360.523229691604 | 385.675278463448 | 373.172504097546 |
| IDH3G   | 192.41551362197  | 224.249210397247 | 238.025903833797 | 248.414210905199 |
|         | 289.213144287085 | 212.622278823808 | 315.799449362526 | 190.548265163011 |
|         | 226.288835947947 | 213.162949250252 | 223.911125639211 | 140.05110691912  |
| IDI1    | 74.3135387703106 | 71.2370255410834 | 74.4508307047509 | 137.677598837555 |
|         | 70.6903168772326 | 83.3664149246525 | 105.802035886293 | 100.616027485975 |
|         | 109.654559065946 | 50.5252048155459 | 63.1566669782858 | 76.3824005526731 |
| IDI2    | 42.9104454767916 | 43.1805016690297 | 38.8775560911841 | 35.314469458379  |
|         | 34.9062568194127 | 36.4986986135769 | 36.8369172900902 | 39.5466975353131 |
|         | 37.0126425326534 | 39.4710743516517 | 36.9060997041453 | 40.1700117452801 |
| IDS     | 147.782301091454 | 131.955454394903 | 118.507569961357 | 242.673166257518 |
|         | 107.211374033204 | 168.17913316957  | 120.231435193839 | 195.893183546434 |
|         | 81.3858672064773 | 124.064628168507 | 115.962193866339 | 115.001179779307 |
| IDUA    | 106.027997253013 | 222.202580186782 | 397.154258378193 | 137.555275829874 |
|         | 488.183286350725 | 148.582198572949 | 147.758917745955 | 156.123501229126 |
|         | 237.632703283663 | 204.710892826638 | 304.658728492827 | 182.976132230487 |
| IER2    | 64.668912004173  | 88.3636380348802 | 43.6670755115848 | 44.0451487108213 |
|         | 50.5110359971301 | 94.2678678253657 | 85.2088054619229 | 82.9322141700549 |
|         | 53.0357938671646 | 52.0999467564713 | 55.1099824417989 | 50.8999542937724 |
| IER3    | 750.151825182993 | 450.515644056585 | 248.321641540666 | 3313.98659031004 |
|         | 511.261925898948 | 566.77872642437  | 867.856842601788 | 1024.97546870349 |
|         | 155.908644253547 | 219.878589678991 | 183.90338485542  | 662.848386826617 |
| IER3IP1 | 80.5437011468815 | 143.728143059207 | 92.4350913779886 |                  |
|         | 113.783910320605 | 61.1216330559316 | 85.9636350040248 | 81.2136969156029 |
|         | 93.421697456291  | 117.228320608065 | 72.2443746456494 | 76.2226219333049 |
|         | 116.547937420457 |                  |                  |                  |

|        |                  |                  |                  |                  |
|--------|------------------|------------------|------------------|------------------|
| IER5   | 183.799353414581 | 255.884444464408 | 231.472806936915 | 285.322305931794 |
|        | 116.362441774156 | 137.424708183613 | 175.41042153356  | 161.422918681934 |
|        | 145.083624161597 | 111.248876636045 | 113.68110396901  | 110.52925781809  |
| IER5L  | 281.840536529928 | 122.0305509548   | 78.1683130800805 | 86.3663084195994 |
|        | 109.758297200083 | 111.760213205992 | 192.264432082651 | 220.054040993848 |
|        | 107.148000219752 | 71.2409890549638 | 102.471939526704 | 62.6868461044048 |
| IFFO1  | 106.219480656782 | 80.7409247380392 | 77.4906145838899 | 139.847976281228 |
|        | 62.1836961153924 | 133.314819245044 | 44.3440839686558 | 57.50915811428   |
|        | 41.3803269429468 | 93.1238695478498 | 97.3188285021124 | 61.3851695159988 |
| IFI16  | 212.945601743319 | 223.911125639211 | 408.080620074472 | 442.546348599648 |
|        | 87.3957386451235 | 413.82087661958  | 76.4889974392545 | 125.091427687365 |
|        | 341.206585871289 | 136.629336440719 | 166.009268520425 | 246.433145017965 |
| IFI27  | 945.065986430527 | 4328.723715755   | 5047.91205452316 | 540.721068846198 |
|        | 334.639325701194 | 802.650020720921 | 1428.47642890543 | 669.776067547468 |
|        | 2771.14077845128 | 397.199620114138 | 727.181489302632 | 284.437758089699 |
| IFI30  | 178.269900400454 | 102.760704801607 | 99.9841766494502 | 1428.47642890543 |
|        | 150.43149196048  | 110.869341159607 | 121.945468001236 | 167.034910927177 |
|        | 81.2249082772437 | 54.7827221235949 | 43.3085358214154 | 79.8331445290301 |
| IFI35  | 183.165559564289 | 267.066062068411 | 253.980053738171 | 351.883708151967 |
|        | 133.893108529325 | 227.404530886674 | 225.725485439572 | 226.407063891022 |
|        | 260.383969219887 | 266.9457657143   | 257.948490663615 | 201.530434441408 |
| IFI44  | 176.341212868114 | 189.015214517448 | 604.951648398924 | 209.89649461562  |
|        | 65.8319449883221 | 198.324467851365 | 238.893145911331 | 231.333080775773 |
|        | 97.7114610828769 | 127.937436596431 | 151.975559850216 | 137.378222527303 |
| IFI44L | 86.3054012048636 | 261.326713935356 | 359.628703006773 |                  |
|        | 79.5838979704243 | 65.3019328668633 | 133.610670717456 | 161.500218853268 |
|        | 131.929700183999 | 54.7966692984192 | 117.033529761587 | 130.890690835631 |
|        | 94.6167194649276 |                  |                  |                  |
| IFI6   | 494.300858189605 | 1037.51323185348 | 801.351998609551 | 472.159979716705 |
|        | 355.319959025243 | 312.530335465784 | 1379.51119430451 | 1031.4414268329  |
|        | 316.256605575595 | 526.146757036152 | 507.375704144286 | 331.306005726359 |
| IFIH1  | 57.0006212637829 | 73.7873098190297 | 78.1683130800805 | 199.349867699158 |
|        | 57.6791750431251 | 78.1952428431942 | 58.3675164086197 | 93.0474674148534 |
|        | 65.7924490713262 | 68.534940191185  | 74.0420372528779 | 74.5886835786452 |
| IFIT1  | 78.6344248102932 | 128.596547789044 | 85.4536891882639 | 104.528976428975 |
|        | 52.3242437351389 | 151.36347984261  | 68.4380822448123 | 79.1922819549042 |
|        | 54.113533179847  | 81.3895045947915 | 99.3142021810133 | 47.6040671292013 |
| IFIT1L | 41.6354649482853 | 39.1982470626863 | 35.6139301508335 |                  |
|        | 39.3750969348308 | 37.5556299264699 | 34.5886782974123 | 35.7055410599146 |
|        | 38.079222289614  | 37.10170285405   | 34.9138625012006 | 36.2435874904689 |
|        | 36.3454320848591 |                  |                  |                  |
| IFIT2  | 95.65872032796   | 96.3918711895208 | 82.6983700200815 | 607.042450917813 |
|        | 61.4366256816323 | 121.86893260878  | 125.752132815786 | 84.8569316561572 |
|        | 66.8632294055679 | 113.336158464071 | 123.768417863139 | 77.8620267163666 |
| IFIT3  | 104.725576313447 | 124.397048303668 | 104.832753086298 | 254.792341536652 |
|        | 51.4230529326653 | 97.0348634204639 | 103.394669961417 | 74.1686961093736 |
|        | 79.5488891958168 | 80.5981334271235 | 85.9596109950132 | 61.356483470053  |
| IFIT5  | 44.8914371498528 | 48.3699741879723 | 43.401782064778  | 50.8567345921473 |
|        | 44.5668141895992 | 50.5148383400703 | 44.7255207589606 | 41.9315419791594 |
|        | 41.9635525160083 | 47.2299678280724 | 51.9302027391447 | 47.2131144508464 |
| IFITM1 | 952.16345035163  | 679.309039810384 | 593.345148568451 |                  |
|        | 2054.64068255575 | 563.573152902421 | 879.708199333257 | 557.094756796515 |
|        | 617.271611375695 | 320.038347979923 | 549.407911286514 | 774.8306350567   |
|        | 580.444451816014 |                  |                  |                  |

IFITM2 3176.96480659196 1307.19925493293 1339.29022988209  
7168.83136860899 1991.4199819544 3941.3269626913 1506.33570635551  
1107.96086673001 995.397944432196 1490.1549980903 2225.65559724391  
2294.75523373329

IFITM3 3546.97585966225 1557.42399344934 1634.61795848352  
3520.7579823657 2528.6392272518 4752.94498024732 727.788854407888  
1301.07436212673 1214.73798692268 1910.5347560855 2513.15722262176  
2435.70120719503

IFITM4P 42.8561766050988 43.0971787292711 44.6032218589199  
46.8954576545929 48.8381507187986 46.263826584899 45.7452456977857  
43.2890595186135 48.4614401417022 40.4136535208406 45.3597029614942  
43.9541718254769

IFITM5 42.6036491382658 37.3634897565502 45.5883690965192  
40.0698728584484 43.7517118200398 37.1317006162938 46.3057385979341  
45.2806199505029 40.4997186069494 45.6868589181768 38.4689132737495  
43.3744503319109

IFLTD1 36.3649677956953 43.3458769998118 39.3709357615493  
37.651298468202 35.3327761997046 43.6670755115848 39.7576136507593  
36.0306975524309 39.2809305246091 32.9003644440608 35.7953070087288  
36.1647506311964

IFNA1 34.9138625012006 39.3999056968598 38.7745734037492 47.2009420656854  
39.2608760193011 37.7000400506818 40.0052661202207 37.4484310268909  
39.3750969348308 41.2276963324981 38.2795150354677 40.8681871019812

IFNA10 43.6706764143908 48.4497719907777 64.0162246399972  
40.7481155008596 40.3452320167286 50.4022543872993 40.4359177791566  
40.6171774724171 40.4220196471124 56.1912096308988 43.844855336215  
49.904979214379

IFNA13 43.4100411978366 39.7835513496873 42.3536549114165  
37.1894304543751 42.6022652963326 41.7256940298128 43.1931731665131  
41.9315419791594 43.2163597439147 42.6366765186182 43.6919270353542  
41.5132248356707

IFNA14 45.0283997415478 55.4635297192076 47.1629799536297  
45.0798408927912 45.1137938810047 45.0882356578404 52.561573697155  
50.0526763693329 45.3407340000202 46.441301934328 46.1390887492649  
45.4218947614732

IFNA16 40.6559419616644 44.3529919625344 44.9758339877851  
43.4410741327254 49.1928206164702 41.554942319225 39.3585350448719  
39.2672712041774 38.1169703906207 41.8613406887824 47.0110068985119  
49.904979214379

IFNA17 42.2455707947223 37.8217989841918 34.2890785915814  
39.6292788039793 38.1644569189523 38.9378717994178 36.197424053556  
42.9301944191913 38.4344387289956 39.7835513496873 35.2339574411711  
39.6352613956998

IFNA2 38.5007204246293 40.8880530359822 35.2838283525874 37.8442841690502  
40.7779767565889 36.6996187567892 41.1507980856436 41.0381860307445  
40.9901805728485 38.4187686307607 35.6970528713709 40.9683275553869

IFNA21 45.0985088502363 44.4411734611229 51.223859150798  
54.6089451252049 41.2740822675592 47.3791873993182 43.3262148375525  
42.9301944191913 42.4540072551568 46.6598879466655 46.4753015651202  
45.6692241948108

IFNA4 39.5676051939342 45.2098033805679 39.8656165405284 40.0322420615846  
42.9090346219023 43.3269087731399 44.3440839686558 39.7509165247419  
40.137818555383 44.7520317855773 46.5308571957384 49.8472708021525



|        |                  |                  |                  |                  |
|--------|------------------|------------------|------------------|------------------|
| IFNA5  | 39.266565827316  | 40.148780650831  | 37.4642807402741 | 37.7469621225553 |
|        | 43.3332476888305 | 38.9378717994178 | 39.1539892144371 | 35.5798430594271 |
|        | 35.6139301508335 | 36.1550293353654 | 38.8507804383261 | 36.8690774823319 |
| IFNA6  | 33.5994525227062 | 43.4396866157171 | 34.9849896310235 | 29.4322896559759 |
|        | 31.6519589095843 | 41.554942319225  | 42.629412460409  | 36.43924066428   |
|        | 38.9006788676407 | 35.3849221682845 | 38.956280281655  | 35.9604262434141 |
| IFNA7  | 36.1232327599945 | 41.6069493017095 | 39.991353369336  | 36.2117792304273 |
|        | 44.0451487108213 | 41.0012755104374 | 39.4012855594431 | 35.4526946152955 |
|        | 40.0870341983328 | 43.844855336215  | 40.547835538778  | 40.1235656101329 |
| IFNA8  | 108.945545005203 | 65.1291617069903 | 58.8936382809165 | 80.9160262677505 |
|        | 77.3367966395554 | 63.6172860741922 | 57.4622430729629 | 69.8777218396476 |
|        | 70.178974380507  | 68.0556717366572 | 66.5310713054733 | 66.1229691315616 |
| IFNAR1 | 137.52864596636  | 110.960501850409 | 109.832638804839 |                  |
|        | 254.322611819303 | 124.490684428024 | 157.463465828715 | 139.472956453414 |
|        | 144.239350177363 | 162.895543924742 | 210.807094064209 | 191.141778714144 |
|        | 222.426799131736 |                  |                  |                  |
| IFNAR2 | 57.8944021095265 | 81.5782824513693 | 110.112236384679 |                  |
|        | 165.684719727205 | 97.3188285021124 | 73.4037256268744 | 116.993403211005 |
|        | 90.9712092640278 | 106.042585997437 | 69.1623287497421 | 77.720889005668  |
|        | 104.486555491331 |                  |                  |                  |
| IFNB1  | 42.2455707947223 | 37.6383530120621 | 33.6816578730693 | 39.5050383901884 |
|        | 37.6527901109005 | 33.2552842693684 | 33.3231576795423 | 32.229154316188  |
|        | 30.493888765264  | 38.528621456378  | 40.8225507267584 | 36.3454320848591 |
| IFNE1  | 45.8108990837624 | 48.275452803061  | 59.8838591118356 | 44.7980740332174 |
|        | 55.6069214673486 | 48.0080291106034 | 45.4164642922183 | 43.7731874801003 |
|        | 57.404059248727  | 64.5093306432163 | 55.9401754632145 | 73.4876346170053 |
| IFNG   | 46.5549623118323 | 41.3610369241157 | 44.6032218589199 | 68.4261608261522 |
|        | 41.8806343997257 | 51.0506441018166 | 40.5585676679482 | 46.8954576545929 |
|        | 36.8127605061228 | 46.5650556481721 | 48.3847843498476 | 37.8490162439785 |
| IFNGR1 | 1554.42895572029 | 777.854349637516 | 1141.25078954012 |                  |
|        | 2067.66516256598 | 624.954583057431 | 637.824136761292 | 735.60603239712  |
|        | 352.292837622545 | 425.435793468733 | 845.41973083225  | 637.565156571985 |
|        | 927.61341837276  |                  |                  |                  |
| IFNGR2 | 1327.93833415582 | 1679.12630849964 | 2721.97551918611 |                  |
|        | 2892.02001412369 | 3124.84336032646 | 1638.16317738035 | 2096.51999792183 |
|        | 1242.75259587926 | 3361.67247904403 | 1149.90692951795 | 1007.03747721563 |
|        | 1876.51621222292 |                  |                  |                  |
| IFNK   | 35.0202257459026 | 39.0894172982439 | 38.7745734037492 | 36.6501141438378 |
|        | 36.8059561571675 | 37.1317006162938 | 38.6243997507646 | 38.2782436497441 |
|        | 36.197424053556  | 34.8137085420423 | 36.7283081422707 | 30.8150126829901 |
| IFNW1  | 45.8574226904273 | 41.6466169548846 | 43.917817324545  | 41.2551966132486 |
|        | 43.8835874380262 | 42.0016830644258 | 41.253645578517  | 44.9977782988116 |
|        | 40.547835538778  | 45.7328341667151 | 46.972521499515  | 42.5365257225985 |
| IFP38  | 58.8224410806741 | 82.0237575809051 | 86.2330249146534 | 76.2591822114739 |
|        | 86.6854406823303 | 85.0275638433103 | 63.7721358300879 | 73.9624143741222 |
|        | 87.4335749014848 | 105.212030988223 | 98.4699679900651 | 104.192417269189 |
| IFRD1  | 51.4660044978406 | 48.3699741879723 | 47.0940613507321 | 91.1834104205004 |
|        | 65.1757400078647 | 77.3640580819535 | 66.979105340228  | 73.8875154527631 |
|        | 60.5948704279864 | 51.5238121536228 | 61.8683444248482 | 66.6615349144199 |
| IFRD2  | 82.1323695817857 | 93.2133061608764 | 86.9032093551446 | 65.524821699432  |
|        | 202.957014793417 | 97.7114610828769 | 117.260454792593 | 60.0835531094681 |
|        | 120.465621774337 | 67.9259304928255 | 75.5799609581534 | 87.4273245333478 |
| IFRG15 | 45.6517320730042 | 47.2770121962655 | 50.0050760710506 |                  |
|        | 50.8567345921473 | 42.4864576619427 | 42.9695585740813 | 44.4639405506967 |

42.0494116081998 40.137818555383 40.6022003765153 47.1477056711335  
45.2783024981315  
IFT122 75.8122107270212 50.9895771651972 57.0427273538849  
50.9293205467648 59.7406133873058 64.3383155834968 73.1262465119304  
65.3477484008479 54.2356999525029 70.9196764450443 59.2837628958562  
54.4992295592001  
IFT140 62.9952378379206 160.973602503707 205.449627031002  
57.8277957325085 85.5362566454799 64.7905331739366 79.5707751325986  
49.2901038327894 115.328304312071 245.853111206859 206.146732318529  
136.011269830829  
IFT172 81.2359429678503 61.6219790276408 63.5107036952143  
59.8102324370568 59.8102324370568 69.7677752398541 105.666698877424  
166.1490536844 76.1869593072029 81.8426140611297 88.3725577276628  
79.4710406831985  
IFT52 78.7045070574092 71.6931243081178 66.2167164788023 56.8404854356062  
71.8314470868658 103.569150754726 92.3787087536027 85.4790745407113  
53.3472907280113 71.9737561190706 65.6010220593397 67.6138276415458  
IFT57 49.1868644496737 64.0903425729408 48.4890615340603 52.6947911480086  
64.3571664944642 122.284299477218 67.6767845246581 56.8094693588238  
63.4531374125233 107.420552630045 87.129027106167 85.5175308034109  
IFT74 55.1306642449627 84.8084949516218 62.9967097752591 75.4466520363487  
70.0133734659853 73.5743059777365 80.354283778818 98.2074490157865  
67.5047089908724 96.3495443565738 100.234661597218 110.302475164041  
IFT80 39.7576136507593 42.9020321355927 38.35720098134 40.4359177791566  
48.1473938886239 37.7427315853995 36.3194282084339 40.4669141685209  
42.7150227340364 40.7063426028871 40.8225507267584 38.9834959368496  
IFT81 44.7463386786906 48.4085972463773 45.7968648044613 41.3027031037343  
56.8903641597175 52.5330333302271 50.2471139112912 44.7470332010482  
49.531907107685 44.7958122466628 48.0258040705037 48.1002535934643  
IFT88 49.3914518899324 46.4861258030402 50.4778868815688 55.1531662914834  
41.7405682794166 67.222434502867 51.8812208789107 50.007830364606  
47.8374975107249 53.7196173866021 63.8399092891728 56.3427558115088  
IGBP1 203.228211195516 244.707381127491 230.763782802004 195.482216656634  
138.170787392253 256.55408314817 131.645714321903 222.985386635178  
255.559793355361 253.267901237295 236.536058101486 411.342959058326  
IGF1 45.1912496459517 43.4396866157171 44.7829632472754 43.074472921841  
44.147557390293 76.1453055441256 41.7614975630362 46.8482302725294  
39.3506426665347 42.9358255168086 47.6884372645373 56.4199442234707  
IGF1R 47.9175508887533 51.3800036046133 46.8267540220952 64.2130157241811  
48.6224651100733 45.6129956328415 41.0381860307445 45.642304356051  
57.0301170427216 52.6879797806876 52.8489752025797 51.0647893605839  
IGF2 101.523741547876 360.900649927623 480.386431986343 43.9798942439645  
448.787414220553 105.125095381533 65.7321440516177 43.9518547354262  
44.4812539947185 44.6217658428521 47.7180816682562 48.5708927206434  
IGF2AS 36.2496364442264 42.8542642792862 43.1931731665131  
39.1706564265495 42.4864576619427 40.650742261428 37.9430145836712  
30.4430902995779 35.3227485563945 39.5637454855233 34.5633623842083  
39.9519547348106  
IGF2BP1 39.3709357615493 39.0102066700839 37.1643693306382  
40.9607305725196 41.6806984441849 32.771863438151 34.806104801006  
32.6039814489621 39.3750969348308 35.4990901121893 37.5583886316038  
34.9138625012006  
IGF2BP2 210.200786815048 65.5367689605146 83.5742879296932  
166.304210248623 61.6452971581503 76.0240426902567 115.610095595509

100.616027485975 111.845105854608 169.18132209076 128.300809076274  
114.016824404095  
IGF2BP3 99.8754776648876 53.0383634135393 76.9373289454707  
61.5515639412892 51.6869155634183 44.4619248757502 61.0979269700412  
58.4200819624972 64.2174369755376 53.1993028936883 48.3847843498476  
48.4535991392809  
IGF2R 1120.83891847181 586.281182112872 613.740813446728 1231.77360353254  
493.322302312578 506.585006700107 532.981045084589 479.318513108472  
356.133736281036 556.417356025042 612.441960343995 456.023620287811  
IGFALS 46.0023068797812 44.2105195734073 40.1985790927248  
43.6726153508978 41.2740822675592 45.2852528185486 42.8684958525042  
40.7311497914871 39.0775870687758 41.6373771565199 41.4508241771315  
37.1747156131306  
IGFBP1 44.380620848621 44.8955824420372 42.785429206422  
38.0958223740111 36.5393857306744 44.0399598874356 41.9393838138203  
38.4128104869434 41.1742244762318 45.3530683538086 38.6662194645633  
37.9607839934735  
IGFBP2 235.593721159442 330.241189572237 278.067057781084  
129.190555260332 166.983092667334 81.3978207813439 84.7782034884529  
225.016731278437 373.802562320876 1390.12380748446 1090.86617066541  
1081.97502255142  
IGFBP3 1519.01001038342 2417.02418518222 1377.24483375075  
129.320408155239 861.427193617946 379.377005627283 902.691776563423  
502.205366225368 2650.09507972593 489.232537791775 267.657143781939  
177.379924616924  
IGFBP4 1310.03307063841 1021.71286017481 761.922486104216  
1224.80240464583 615.442484911026 1319.32406112346 440.282299601096  
489.232537791775 874.419252731128 1359.9708539999 1228.1735887278  
1810.67209360676  
IGFBP5 2272.91548405176 438.681666410245 1445.73674428909  
958.473187253938 1357.41745370754 3070.83113612925 61.3149617644002  
1345.37091574015 132.57180783668 2934.35616793443 2921.68921750799  
2384.00264993279  
IGFBP6 242.396401163598 161.48562926756 86.6186787663248  
313.399524593316 120.721482177994 4406.55576617324 60.7992483126292  
223.168185178205 209.524518082089 2892.02001412369 1956.75875151802  
1780.14552702126  
IGFBP7 2440.77408185413 2215.01815680371 3690.00752647453  
2045.24530722676 1999.21832626916 3749.78281766196 263.068504548549  
790.786577596971 275.061444728555 1519.01001038342 1487.80306986156  
1896.06380611235  
IGFBPL1 37.0320432433314 41.8073910693411 36.769073068743  
34.8137085420423 42.269054475455 39.8455060654531 41.8315602975157  
40.4359177791566 39.3750969348308 35.0082729554459 42.0750889188255  
34.806104801006  
IGFL1 43.5710871617107 88.4740208892504 41.6079958749402 67.7121534934164  
40.148780650831 44.4619248757502 95.9298109273155 260.964562714558  
54.7966692984192 44.6918600441328 162.143245260314 37.9607839934735  
IGFL2 87.9251957244202 36.89524015739 42.2577689927563 43.4410741327254  
40.4639532172338 41.7627910693483 40.9157352260901 41.6466169548846  
40.0403898620771 44.6918600441328 37.4642807402741 36.8690774823319  
IGFL3 60.0793579902362 46.6996902348633 49.3780606970538 42.4580504587581  
46.4343327861696 33.5578650644246 49.3854238365325 38.2782436497441  
46.2027193115397 45.1569741609597 46.824299585607 43.5738557773903

IGFL4 39.3709357615493 39.9697332660833 40.1985790927248 42.9358255168086  
40.4639532172338 44.2607789091176 41.4742337714895 39.2672712041774  
41.6616444147804 35.7202909649682 38.3684202018524 40.2669497398702  
IGFN1 36.9060997041453 37.2810767789306 33.9435456570176 32.554751989205  
39.7568367479301 37.3799542961839 35.3362091871364 37.86982638952  
38.6322728994674 39.7835513496873 39.6403089864678 34.5633623842083  
IGHMBP2 56.1912096308988 57.1595768494068 47.0055981216687  
59.6153684374766 59.1948983423381 48.7781962164988 62.801431502597  
67.8061298261394 54.2825877218965 70.7003843117511 69.036463612998  
55.3563533836982  
IGJ 45.9090659324223 468.98857415608 413.067407579649 302.50850157207  
37.956732373465 74.3729155936862 65.524821699432 72.9752827496503  
35.2143190355414 36.9102644736882 40.4504608195666 41.7575097298927  
IGLL1 224.749607192071 2663.19221471348 2417.02418518222 3202.8848520816  
53.8658229797154 142.55778399096 658.282562295783 536.013150313097  
55.3619977587354 43.9118340045283 43.3085358214154 54.2625553617642  
IGLL3 36.6975731268334 94.7498756176388 118.358996104366 293.883582116334  
41.2424637338424 39.4953494583071 44.4639405506967 47.6952179922944  
40.3316153483289 39.9948390976317 42.046575509735 44.4067063477243  
IGSF1 41.0136069709699 40.4003119241613 38.9790184198145 43.3554905202712  
47.3172462673426 41.628211174823 42.2577689927563 41.4702213972048  
45.7792335738285 45.2994802465737 42.1550412794904 41.4061152929154  
IGSF10 43.5710871617107 36.2103905554984 36.5474283500601  
35.49696651597 40.5710637884029 60.5803031036931 39.5496902678788  
38.8495095797881 35.6970528713709 47.3791873993182 45.7328341667151  
41.9430737035925  
IGSF11 42.8596678196469 53.9275079525238 44.4612332327353  
45.0798408927912 57.1021912253879 48.7019915522206 59.9266636679987  
44.6484005362281 54.5518174219283 46.7646877499666 44.1642484298135  
43.5367669381526  
IGSF2 43.6706764143908 44.2105195734073 49.9256753636167 50.8567345921473  
48.6224651100733 40.7616966228404 54.339958888486 44.8997235283254  
45.8325181856483 44.4652605017595 44.2925355984056 46.5650556481721  
IGSF21 55.0078788655089 47.765848710116 50.6987358483181  
52.3004056941891 44.5668141895992 80.9821967801845 50.2016912396771  
45.9604707098953 43.6670755115848 50.8826620053386 52.2229654768933  
49.2064066614865  
IGSF22 42.8036731479932 48.6447083765118 42.7303139017786  
40.4359177791566 50.2163892855092 40.7616966228404 44.6032218589199  
37.7612949798895 45.1899271235974 42.5664883002833 42.911855821602  
46.4499258373233  
IGSF3 149.691911022686 231.942272401651 137.580418363812 50.3127977239083  
97.4137766910365 43.2312848495114 119.846620703059 144.324036829708  
188.077820976107 255.126812649967 184.808179948172 225.35760689842  
IGSF5 46.0920218698606 49.0697565324841 50.2869791217819 46.8954576545929  
45.9104478407175 41.4508241771315 47.2927436772465 86.3237770387663  
40.7847110517594 48.2596564318071 43.7585538437696 50.8442982601142  
IGSF6 54.1745577382276 54.1773909134233 45.7968648044613 536.973599140459  
40.8873907150245 55.8243694410835 56.7780520416533 53.1052228246467  
43.5669306063196 42.8936990772838 36.5359455830388 49.5539622682049  
IGSF8 59.046385957117 50.6229884142872 50.9933795450314 46.0228732507872  
59.9326265577462 43.2805590023412 46.9929836306816 49.6203214143464  
66.603126065489 52.0999467564713 50.5188367542048 49.5539622682049

|        |                  |                  |                  |                  |
|--------|------------------|------------------|------------------|------------------|
| IGSF9  | 78.8357122967692 | 87.9152471471338 | 55.094385444315  | 35.9521941716188 |
|        | 144.139555313429 | 43.8582747295766 | 157.843337785472 | 104.089998273812 |
|        | 101.46584765758  | 88.6608345370342 | 57.7786197537899 | 43.8575940017119 |
| IGSF9B | 41.8409927585705 | 40.8880530359822 | 43.1931731665131 |                  |
|        | 40.3180310664156 | 46.8674366115656 | 60.4065050472082 | 40.7910160811527 |
|        | 45.8669209716694 | 42.9020321355927 | 54.4825201506931 | 56.1379957867124 |
|        | 45.0035308952466 |                  |                  |                  |
| IHH    | 39.4710743516517 | 49.9547657591437 | 38.6727842796202 | 37.7469621225553 |
|        | 38.1644569189523 | 36.4986986135769 | 44.0687697278114 | 41.2551966132486 |
|        | 37.3600014814388 | 36.2435874904689 | 45.5707650534259 | 42.4607795638552 |
| IHPK1  | 134.19834305339  | 167.229755109155 | 142.933216800073 | 193.806701229141 |
|        | 187.733278812798 | 171.501864800548 | 204.862161704394 | 123.455270940015 |
|        | 154.752920877816 | 141.087571926258 | 147.719172115976 | 117.574549567    |
| IHPK2  | 123.739272396278 | 125.290426098227 | 106.309161354804 | 59.7044210110693 |
|        | 166.752205770965 | 75.5561597374812 | 125.184689092836 | 67.0256385495669 |
|        | 138.910687241655 | 59.6246428440926 | 76.2226219333049 | 85.215646983121  |
| IHPK3  | 47.6397712007919 | 40.6380495994768 | 47.646800205189  | 42.4580504587581 |
|        | 54.6820069269589 | 40.244271403831  | 47.8947595316832 | 47.6952179922944 |
|        | 45.0017158586743 | 60.4837400912239 | 43.0016969050339 | 37.0953622406687 |
| IIP45  | 83.374777060444  | 79.1432909353319 | 80.7338782543351 | 88.8330881965986 |
|        | 139.989008296272 | 68.3234331335073 | 95.096268847843  | 104.541813290553 |
|        | 80.3500323413132 | 63.3006977162657 | 61.1801493883012 | 59.9576867319572 |
| IK     | 250.244199415895 | 229.881790983135 | 234.556113280762 | 307.329227013816 |
|        | 188.943404504867 | 399.410299413602 | 219.737294408079 | 246.965844426351 |
|        | 245.004434952963 | 206.768099707991 | 248.482699989877 | 351.239677010973 |
| IKBKAP | 43.632365631458  | 51.0175677516029 | 44.825830634601  |                  |
|        | 43.8495248991589 | 48.5666902992029 | 49.7149784386993 | 50.0088611244948 |
|        | 45.5581356216957 | 48.0163377492228 | 42.7275315121163 | 51.0013344286851 |
|        | 45.4218947614732 |                  |                  |                  |
| IKBKB  | 84.511841810844  | 86.4898752526885 | 89.2285288333749 | 78.9479233685889 |
|        | 66.3075095149783 | 66.2167164788023 | 87.275548276476  | 89.1012752492647 |
|        | 77.720889005668  | 92.3388129097482 | 88.9836122218372 | 95.2218627805387 |
| IKBKE  | 92.6545309624315 | 121.729442469889 | 143.383133346874 | 124.490684428024 |
|        | 85.1661952927159 | 51.9421032049606 | 138.23147386089  | 73.2037966614621 |
|        | 106.361958225818 | 112.919063481867 | 96.3495443565738 | 82.3254961129575 |
| IKBKG  | 216.488139476342 | 268.745928429069 | 409.554706384667 | 269.582598918998 |
|        | 397.199620114138 | 245.0324923457   | 208.7739716139   | 177.958475301951 |
|        | 212.945601743319 | 165.311139930529 | 191.668846959973 | 167.319747725488 |
| IKIP   | 51.524711857679  | 55.2893984191264 | 51.4704882732949 | 61.6510502615429 |
|        | 55.094385444315  | 51.2207153770095 | 48.3411413510851 | 43.4812166409346 |
|        | 49.420862176345  | 41.162473449625  | 42.6913548400127 | 45.0583552831013 |
| IKZF1  | 48.4849194706125 | 54.0461131287999 | 72.5835488194631 | 143.822560762049 |
|        | 42.0709558258414 | 48.0350549043063 | 52.0942589368478 | 49.6203214143464 |
|        | 39.9444191873552 | 41.6373771565199 | 48.1352470945488 | 45.5800840647989 |
| IKZF2  | 45.3872406432794 | 55.3178018558518 | 46.6241521517453 | 43.4410741327254 |
|        | 47.282591828791  | 43.7630587657205 | 52.0942589368478 | 49.882563505629  |
|        | 52.5215406262267 | 46.7646877499666 | 48.7213586071409 | 50.8999542937724 |
| IKZF3  | 47.2862299990938 | 59.6359245937831 | 59.1533197797534 | 55.8709511400674 |
|        | 55.0767527801658 | 43.2805590023412 | 62.1970616836737 | 45.7476095696859 |
|        | 49.0986627051784 | 40.9558083259517 | 48.0270808941036 | 46.1088006335399 |
| IKZF4  | 67.0577715520007 | 69.3525901554637 | 64.0162246399972 | 59.0965219753805 |
|        | 67.7155610106537 | 105.197692490363 | 65.644767142472  | 78.0020909283414 |
|        | 65.0810479794187 | 76.8998454389745 | 78.6402083787251 | 62.2025996860055 |

IKZF5 55.0078788655089 89.19837608959 81.4931910857436 60.7741670229412  
89.4747568145717 80.3805507705979 56.7780520416533 54.0507720792049  
66.4251023257203 59.8130420783374 60.7516146716018 72.7015808995427  
IL10 475.621740714165 257.948490663615 310.188313944313 506.585006700107  
212.00247895282 208.7739716139 356.628599887098 755.852629128252  
192.058030454066 668.584452504579 659.126408705362 455.444228161475  
IL10RA 64.0759817636265 74.1148641558178 66.737740728688  
242.503720442197 52.4370718282084 63.8740412329753 51.0013344286851  
73.6855877240541 43.0930293831497 52.7972156492746 49.0361180089431  
52.4992300612807  
IL10RB 304.133852957499 439.558287621096 390.978292094212  
738.66912772732 299.052630634189 254.639522735592 345.942093303061  
289.05213385509 370.150839052727 239.229093340475 267.427827956058  
385.36587480414  
IL11 76.5505585423421 46.8954576545929 38.6005272730664 51.949834638817  
58.7460488758053 36.4986986135769 35.0305278582179 290.81245174957  
34.5633623842083 32.1260264272477 35.6041926503637 37.2810767789306  
IL11RA 85.1950626054282 71.6849360818041 69.0503036666628  
82.4084917533632 78.4289643729837 181.123652339134 57.6913861717513  
93.8009890556664 60.2001412023436 202.060761076547 186.350104132737  
111.166893747402  
IL12A 43.1805016690297 46.2286164776607 43.5710871617107 42.357910063876  
47.4548471240051 37.8102105794655 38.1793598983615 40.3357777530419  
40.4997186069494 43.9450023643394 49.1868644496737 47.6040671292013  
IL12B 35.8208542506595 40.0527893189096 41.785676764591 48.4916117779992  
40.5710637884029 37.0180934800573 42.0605906240248 40.7311497914871  
40.8970401536578 39.6719190054379 41.6336636285875 42.8864415494484  
IL12RB1 43.6434576713809 47.3536182445315 43.9063490244748  
46.6986977330569 39.2192721306168 40.9043306643373 41.1507980856436  
44.95701484183 41.7627910693483 40.8462613935508 39.8184668132023  
42.171601283248  
IL12RB2 43.5710871617107 49.6203214143464 41.3366779545815  
40.3180310664156 43.7517118200398 51.3886035574416 47.2927436772465  
48.5681478665796 43.3744503319109 44.4652605017595 43.1931731665131  
43.5738557773903  
IL13 36.5393857306744 31.1853651446075 35.8265993915844 35.8472302065546  
39.0564222526273 40.650742261428 33.3231576795423 36.9355798143571  
39.4762546236449 35.2880714952489 33.6902293666089 40.0557788909923  
IL13RA1 668.773022931608 330.737070535671 374.601792595646  
723.853348464335 298.031228833741 387.311743342483 325.949742917126  
393.209708455013 431.353025968649 322.109212713082 291.785618741057  
386.372142079981  
IL13RA2 71.6849360818041 44.2105195734073 43.0971787292711  
68.0471049167726 79.3889841821749 43.2805590023412 41.9393838138203  
148.514056973195 211.253227661874 41.2276963324981 36.6298807161755  
39.8497227447888  
IL15 50.5291432329798 53.6741873729867 49.2427759486929 64.4895418579465  
48.4662973897407 54.3720504123075 45.7452456977857 50.3082459161777  
57.1595768494068 45.7424985641244 49.9791966667317 47.7962548556026  
IL15RA 51.138877923954 48.3464815242327 48.3570240922825  
47.8164193292842 49.5210706664792 60.1042270393382 47.6853839342179  
47.8947595316832 48.6224651100733 48.5571567616945 50.2203578628217  
51.392860749191

IL16 47.0940613507321 52.2269052457335 46.7800033479223 67.8978240198575  
42.7489468897708 55.1037284831588 48.5544398725959 48.0283573444179  
42.5406888281114 54.8346842758068 54.0374522273907 42.828737648529  
IL17A 38.1169703906207 41.9894412416874 37.5597671487621 41.6564075217517  
35.2163900400329 40.040778349137 40.5585676679482 42.357910063876  
38.2215591930186 40.7063426028871 35.3362091871364 38.5279745308203  
IL17B 40.0557788909923 40.716553247236 40.1985790927248 42.9358255168086  
42.1650127805175 40.244271403831 42.4939802311136 41.5464765641928  
40.3316153483289 40.2112371512838 43.844855336215 42.0424641526302  
IL17C 49.6241203903354 45.6533175604486 59.0308764112247 51.3851157261451  
69.493532577364 39.9397419279057 49.6872467499977 122.482560090133  
48.0163377492228 42.3606390470387 45.7328341667151 39.4490233720848  
IL17D 108.815245119101 58.3164247463092 52.4485219671976 51.7739270955254  
89.4747568145717 266.581466060604 112.113501370522 181.093943398293  
61.8824218975538 128.157032116902 115.40235710164 80.0919469092368  
IL17F 37.0320432433314 38.0226905622357 41.785676764591 60.620259884953  
38.8456942580061 42.2577689927563 46.9929836306816 37.6557714476853  
40.5912213523345 42.785429206422 44.4688999098904 35.9604262434141  
IL17RA 55.6268253440479 53.2046867327331 55.7764940944098  
101.560929859785 48.0234896130991 48.0350549043063 60.6548851977964  
55.5578334877425 53.4604353973381 50.8826620053386 56.3884556031093  
57.445796273665  
IL17RB 35.9305494063137 57.8759339109109 49.2595762436995  
87.6763065012524 74.1282220615085 41.3553369544097 72.8653205184014  
39.5466975353131 51.5888395924843 40.8970401536578 40.1742127891824  
46.7591817286632  
IL17RC 60.9710783023013 55.5789922793469 55.6119508705485  
52.4256436890829 53.9391973360983 57.0427273538849 60.3217748365169  
67.474556589181 48.3679250034853 62.7743500747415 62.5506324864207  
48.1627097465883  
IL17RD 240.086349973689 143.997817398894 133.673536028938  
216.911833562615 110.869341159607 125.81889994067 171.623830248512  
377.221676837377 113.287380238064 275.407306413402 237.443715611786  
208.023488988931  
IL17RE 42.3433931248155 44.2630383225933 42.2732555030699  
43.2706707408262 48.6707521528908 43.5474493120701 43.2776458914333  
42.2577689927563 40.5491080069964 40.0599807618105 46.3563690926644  
41.1801554437554  
IL17REL 44.5282181324797 39.8695929627783 40.4070046183108  
45.1944222548351 39.6535880152834 43.4681646416585 42.357910063876  
40.931294690669 45.1899271235974 38.0078357808393 38.5668610487033  
44.1452943804044  
IL18 5733.54417656207 2167.91218703382 3421.24021192326 3707.73750609316  
2545.03032507597 1591.51486001004 4036.89580181979 5932.92478996609  
2621.65272077828 6555.04068292972 5354.58328030315 4128.92158369026  
IL18BP 97.1406120094484 73.0855167819246 67.686778662624  
159.76714232068 53.9074374788981 58.6711059433922 46.2395419410743  
69.8647472333595 46.1569135229922 47.1635381911975 54.113533179847  
52.7924213633885  
IL18R1 48.2910530887214 60.6080172588224 61.6878176260761  
255.197732321307 71.4183281327686 93.6752479496469 79.1432909353319  
66.6320017520888 67.1278109419819 45.0155543555707 51.1483696410762  
56.361708620372

IL18RAP 46.441301934328 62.0908175930716 87.6178717341967  
 642.946369683508 48.8381507187986 144.500148287951 174.007271403635  
 52.6960621424156 45.9227107476843 36.2435874904689 61.8445915808329  
 46.4499258373233  
 IL19 41.8409927585705 47.8400694856726 39.991353369336 46.546116650292  
 39.6535880152834 43.5752393599169 113.692418102755 40.3357777530419  
 44.4395580493118 41.9097689475185 41.9083581529276 40.5235471987417  
 IL1A 48.5835484742456 481.492404948275 110.626479311082 1169.14891282789  
 332.882251013334 79.1922819549042 482.238595345574 268.419751472464  
 89.1217605204013 72.42732668079 96.5451512198207 224.976641879383  
 IL1B 165.775214685061 160.425627898607 473.688869614777 10351.5373412096  
 207.833867050257 339.210875653066 2184.70038900784 164.435300801872  
 70.0801020070064 67.6169355376864 67.7280831060202 146.196470375622  
 IL1F10 39.0620487644635 43.5873188565519 40.8846826807717  
 41.4273122914951 41.8806343997257 38.6704566269103 40.968974769473  
 38.8495095797881 36.4476883897928 42.1317134987795 38.8132170743603  
 40.8098117292322  
 IL1F5 50.9895771651972 39.5050383901884 42.1901757067073 54.6089451252049  
 41.6806984441849 40.7616966228404 38.8417151851134 45.5581356216957  
 39.2809305246091 43.7303813515864 39.0550139257658 40.3316153483289  
 IL1F6 46.0920218698606 36.0366673493555 37.9482157381008 43.8002456102021  
 38.0598374201407 43.1826328292558 46.3057385979341 41.4508241771315  
 41.6616444147804 41.1222709786153 44.4688999098904 39.5418280570561  
 IL1F7 46.4760131160091 48.4980626712175 50.9933795450314 53.0284011078097  
 47.965492554043 44.5180992653789 75.0294180790249 68.3372228877569  
 46.4499258373233 49.7568909515845 37.801577367436 44.0977148249302  
 IL1F8 43.2028319630577 38.4678643044777 42.9104454767916 45.1094678231052  
 41.6383327669122 40.8634043028528 39.8695929627783 44.797320243931  
 37.6610682780061 39.7835513496873 41.5421429082231 41.0183489151839  
 IL1F9 38.2083710281545 46.8236022402545 63.2475738480323 72.2577390063259  
 42.3685136297603 41.6590564937735 46.3057385979341 47.4740726032707  
 38.9834959368496 40.8049408996274 39.153226699662 37.3600014814388  
 IL1R1 42.3433931248155 34.3715326040967 36.0306975524309 51.949834638817  
 44.6834648302383 46.0364000143537 36.4098694708483 67.3976855661302  
 36.8127605061228 40.2112371512838 47.6125796208753 49.8253396161069  
 IL1R2 42.9613924925696 45.7562276914441 72.8472187581193 903.756866967447  
 65.6824363141962 54.5952754712007 99.0545942554244 40.9901805728485  
 45.7226406704445 43.119837808537 39.6719190054379 45.2265319826548  
 IL1RAP 46.2190348814788 43.2149698150931 51.9447450229707  
 81.4367600457584 45.4751076037511 41.6086894860496 44.2795065595546  
 43.0944129868777 45.5265270192861 44.5317661630912 43.2649781354792  
 48.2220547806679  
 IL1RAPL1 64.9367707455078 42.4493032770053 41.2365089689635  
 45.5869891570251 45.1137938810047 152.630871384615 44.7255207589606  
 49.3880946790306 41.7627910693483 108.39424630351 79.9567256807679  
 47.3172462673426  
 IL1RAPL2 39.4710743516517 32.6416008433981 43.6670755115848  
 38.0958223740111 41.7929491793697 43.1826328292558 37.7136011474903  
 40.6171774724171 41.6616444147804 40.2112371512838 38.5668610487033  
 38.4330755397458  
 IL1RL1 43.632365631458 41.4223563635976 40.6440776327492  
 59.897987870592 50.4260283682427 52.9953193251303 40.5585676679482  
 59.9515570764012 40.4518431978241 41.7405682794166 41.6609976002931  
 45.1193245439293



IL1RL2 42.442231667357 44.7829632472754 41.785676764591  
 81.0057400164851 52.9433495155796 49.641159251878 51.7714254834195  
 39.3709357615493 44.8003345643334 43.7303813515864 42.170702295259  
 43.2776458914333  
 IL1RN 109.029196594263 356.628599887098 173.391542207362 2266.34088015654  
 104.541813290553 90.1830062843449 738.66912772732 279.901217752341  
 196.228284571015 151.088035451997 114.464626286414 97.6023731094756  
 IL2 43.1805016690297 41.4508241771315 40.5734458834617 36.0481934423077  
 35.0181575202066 37.5887129572848 41.253645578517 36.8400213077707  
 37.8319142847141 41.1222709786153 38.2795150354677 40.8681871019812  
 IL2ORA 134.869029698594 77.0244607682203 89.6568705925966  
 44.6905691366696 74.3523005665671 43.8582747295766 63.5738862549306  
 48.1591264215184 58.2401724760744 88.6608345370342 69.4877749654481  
 80.3500323413132  
 IL2ORB 60.0793579902362 57.4054069675016 475.621740714165  
 50.2163892855092 46.3150221024046 51.0506441018166 50.0088611244948  
 41.2551966132486 71.4864243594056 53.6429962450784 45.5707650534259  
 47.9566297250148  
 IL21 38.8561375693335 41.554942319225 45.8844325913247 41.8778873678551  
 38.5512429290626 41.6590564937735 43.3262148375525 42.157627240486  
 42.0621425894624 45.0155543555707 33.5370783156523 40.6614700944853  
 IL21R 45.0283997415478 46.7591817286632 43.2721716572958 44.2238927021522  
 44.7359392883974 40.2062851265091 41.4417765092034 44.6107027295193  
 42.8036731479932 42.1454750198208 39.0769398584742 41.2437378488025  
 IL22 40.3478825593224 39.2542963855807 43.4544762830742 41.7614975630362  
 42.9090346219023 45.4607426241257 46.8613212048981 41.5934628038429  
 39.5806465938526 40.3458948319669 43.1931731665131 39.6833800000587  
 IL22RA1 39.7576136507593 44.5152708955623 40.6737160001291  
 40.9607305725196 35.7973685350741 39.6251842352088 39.8695929627783  
 41.0381860307445 41.6616444147804 39.0648733099061 41.8168470823451  
 40.4639532172338  
 IL22RA2 41.9974588626347 38.8336427948187 39.7411455670172  
 39.6609238036815 38.2069499294002 40.3034574135048 38.4005795891396  
 39.4710743516517 40.4220196471124 39.0648733099061 39.4762546236449  
 38.5814307557439  
 IL23A 49.540449125788 58.4476706144086 56.939860285007 129.190555260332  
 44.9936360641969 42.5660695551615 165.606015336587 108.700838142885  
 48.0163377492228 43.1839109702714 38.8507804383261 69.303129494807  
 IL23R 41.6354649482853 44.4411734611229 41.8389336728199 42.8235313007746  
 38.1042454705119 43.1826328292558 37.2316700720288 39.1652965788406  
 42.0621425894624 38.151911051187 39.8184668132023 37.8129870676592  
 IL24 61.3005673792118 38.956280281655 42.3962308437248 230.664926508522  
 45.1137938810047 37.0698056696061 45.1741601472623 113.388372364837  
 40.6533975461148 38.957687788868 39.2907645923217 38.745552403895  
 IL25 39.7576136507593 41.413768254554 37.4352614195366 41.0273093212371  
 40.1207285185295 41.9097689475185 39.6222000738266 36.4945692854432  
 43.2761454096265 38.9271399577966 40.1341976911042 40.0136663626344  
 IL26 42.8036731479932 41.554942319225 39.4710743516517 41.5464765641928  
 46.4343327861696 40.650742261428 40.9157352260901 41.2551966132486  
 40.2274522635576 44.7958122466628 43.401782064778 37.9607839934735  
 IL27 35.9305494063137 37.4540772310118 35.8265993915844 47.3574589211166  
 38.0598374201407 41.6590564937735 33.9750800030909 44.5029690493211  
 37.4540772310118 40.2112371512838 37.9946685306274 39.2469742642337

IL27RA 150.505000526934 113.624887028422 78.5325880060762  
 277.837785971587 116.882934971483 64.5187138759372 87.3508610599789  
 94.6432868887401 151.047739254277 58.115198353247 54.4825201506931  
 57.290967307936  
 IL28A 50.8388984085636 43.5182502375207 43.4709415392696 40.9607305725196  
 42.269054475455 36.4986986135769 40.5585676679482 44.293922970134  
 43.3744503319109 47.0055981216687 42.911855821602 40.4639532172338  
 IL28B 37.8386378737561 39.8695929627783 37.1643693306382 43.3078542962968  
 39.0564222526273 224.249210397247 40.7910160811527 38.2782436497441  
 41.6616444147804 191.482692108417 216.526205739151 151.344720108793  
 IL28RA 54.6235981131919 131.010196997585 80.0183739952818  
 76.2591822114739 68.8362790228976 42.9695585740813 144.863548409034  
 70.1211450522292 73.9416745419036 73.1931742801095 70.4204944097269  
 77.1059855034406  
 IL29 40.9157352260901 39.2542963855807 41.3366779545815 40.3180310664156  
 40.4166536885831 43.7630587657205 42.357910063876 46.695848687694  
 37.3057614736707 39.2623423164488 43.5258090162298 37.8490162439785  
 IL2RA 38.2083710281545 49.83247261979 57.165971310746 64.2130157241811  
 39.9088079891223 45.5758521267508 39.4916414839923 46.8482302725294  
 36.4816715148518 33.7238325555193 33.6902293666089 36.9162349182365  
 IL2RB 56.921728372453 107.836867810972 69.3468840908665 117.699959435983  
 48.2748123114598 33.895835691032 41.3594868055879 60.0835531094681  
 46.1101825640108 34.5718473203083 49.2206713037152 40.5703581862752  
 IL2RG 37.7384958256497 40.0527893189096 39.991353369336 68.9937449813561  
 37.3508690072156 43.9724628401189 42.4939802311136 44.4031868028216  
 36.0741672064298 39.9948390976317 41.9908237694988 41.5536168238478  
 IL3 39.5676051939342 39.7835513496873 38.6727842796202 31.1401844809132  
 41.5668884168669 46.1513019317765 41.706879587091 38.956280281655  
 39.9444191873552 39.5637454855233 38.8507804383261 38.0452862258803  
 IL31 40.8681871019812 37.2810767789306 37.3687900733549 32.7960913111995  
 38.6454098044474 36.4986986135769 34.9344532055397 33.8558232866797  
 35.860430241131 39.8873706855774 31.1150868775826 41.9430737035925  
 IL31RA 44.6231541342 39.8695929627783 39.1799070031819  
 42.4580504587581 43.1252272136667 47.2927436772465 43.1931731665131  
 42.2577689927563 43.8482802038826 48.0211752672327 44.7926323492519  
 44.7401523707775  
 IL32 149.076166432567 88.9836122218372 83.955786676926 111.939677225005  
 56.9360840563854 62.8946975076799 62.6885730386156 72.121833189378  
 52.5307002738469 56.057906531592 61.4800543360853 55.5276281380084  
 IL33 43.6706764143908 69.9872801240574 67.4811066936124 132.838429478396  
 46.5557478175976 348.65230953701 48.8319884367456 50.5070012045444  
 46.581796165231 84.4349803529132 94.5111909776371 138.336991036544  
 IL34 57.2960245538881 55.0009147092272 46.1653991089885 43.8002456102021  
 42.9090346219023 47.2009420656854 48.8319884367456 43.4544762830742  
 46.3203995372658 60.8730416435467 44.2142581488029 45.0985088502363  
 IL3RA 53.0290605707162 46.0023068797812 52.4485219671976 94.9785931907153  
 44.4489662507893 52.7156971154405 46.0228732507872 45.2806199505029  
 46.3203995372658 50.8826620053386 50.2203578628217 49.8253396161069  
 IL4 39.3709357615493 39.8455060654531 42.0233072093141 41.5464765641928  
 43.6587492470348 44.0399598874356 40.8681871019812 41.3506832276112  
 41.5296458719756 42.3606390470387 42.5864346233886 35.9016808898213  
 IL4I1 62.0553450433433 49.5443425465542 43.6039443285137 175.378964448101  
 45.9104478407175 46.574682061365 56.6537562775715 47.2864663693787  
 43.8482802038826 43.128936937037 38.9240290061433 41.7072675309997

|        |                  |                  |                  |                  |
|--------|------------------|------------------|------------------|------------------|
| IL4R   | 134.407474121421 | 100.891869710611 | 235.544416908354 | 212.99813190918  |
|        | 99.6243435693941 | 135.11808699414  | 89.4747568145717 | 123.739272396278 |
|        | 124.646386399592 | 133.38594323309  | 140.35042464015  | 170.829628173552 |
| IL5    | 41.0043775553254 | 40.5852276210998 | 44.4652605017595 | 42.357910063876  |
|        | 45.5198200633333 | 40.3946758935842 | 41.706879587091  | 43.2890595186135 |
|        | 46.2027193115397 | 43.2438688757519 | 41.5421429082231 | 43.6434576713809 |
| IL5RA  | 43.9309845324767 | 46.7980335276155 | 43.7630587657205 | 56.1780366332082 |
|        | 40.4166536885831 | 42.8598805316863 | 42.6913548400127 | 43.3838505886856 |
|        | 43.6039443285137 | 49.6203214143464 | 44.1533327883807 | 41.863927676552  |
| IL6    | 162.124919858334 | 142.614006543733 | 117.074650076861 | 353.868749867979 |
|        | 100.114114765033 | 1689.77066894108 | 234.873589896708 | 355.821515437298 |
|        | 37.2810767789306 | 48.0211752672327 | 46.0905079010237 | 62.2025996860055 |
| IL6R   | 43.9309845324767 | 46.0323106800336 | 46.3150221024046 | 82.3768788448119 |
|        | 42.6022652963326 | 47.3375061488583 | 44.4639405506967 | 41.2884376047238 |
|        | 40.4997186069494 | 39.8873706855774 | 43.7585538437696 | 42.0709558258414 |
| IL6ST  | 39.3100256336821 | 37.958111840848  | 41.1742244762318 | 46.0905079010237 |
|        | 39.3667161654772 | 51.3886035574416 | 45.5629520869561 | 44.1311654985682 |
|        | 35.860430241131  | 41.5435611403119 | 43.0710577955487 | 44.7871262003648 |
| IL7    | 41.9918605927928 | 54.3554233228353 | 50.8303921211581 | 47.2009420656854 |
|        | 44.9384441371181 | 57.8585041080995 | 43.4544762830742 | 40.3691324547049 |
|        | 44.0519245668737 | 45.4614234442527 | 43.401782064778  | 47.6040671292013 |
| IL7R   | 106.140215438654 | 134.908982962131 | 203.619260934048 | 808.857027942253 |
|        | 87.9206275762349 | 62.4914906186314 | 126.204310123186 | 88.8039637390786 |
|        | 43.3262148375525 | 51.3907321092333 | 59.6922302604696 | 71.5249259772583 |
| IL8    | 1487.80306986156 | 399.410299413602 | 2150.8715161597  | 18219.5845257111 |
|        | 707.4124863603   | 400.093769705765 | 10235.3288951482 | 1664.00821059181 |
|        | 823.933615182634 | 102.194935174057 | 61.1801493883012 | 67.3183506012892 |
| IL8RA  | 33.8558232866797 | 44.1239711172417 | 46.7508829977587 | 154.019005732316 |
|        | 41.2740822675592 | 49.1013967533186 | 40.9157352260901 | 35.1738399826814 |
|        | 40.0403898620771 | 31.5892202809227 | 34.9428206949566 | 35.0222940937513 |
| IL8RB  | 44.7044140979108 | 50.4022543872993 | 55.094385444315  | 489.983164420779 |
|        | 46.0977687311222 | 81.2314452281031 | 100.829511546674 | 49.6203214143464 |
|        | 46.7760357462635 | 47.611018474151  | 53.1505787220552 | 58.112348043634  |
| IL8RBP | 43.7585538437696 | 46.7591817286632 | 48.2883694323339 |                  |
|        | 45.8844325913247 | 45.6895223823001 | 47.0027453663546 | 44.2166118829877 |
|        | 38.079222289614  | 44.0519245668737 | 37.920964499903  | 36.6298807161755 |
|        | 45.1735152121056 |                  |                  |                  |
| IL9    | 40.9558083259517 | 40.3104838541906 | 40.6312687664188 | 42.1273928203021 |
|        | 42.7982502551634 | 41.7256940298128 | 43.6025443656008 | 37.7612949798895 |
|        | 37.1820543575123 | 37.0740019672788 | 37.7963032976457 | 40.9149601380325 |
| IL9R   | 46.0023068797812 | 39.2907645923217 | 39.1799070031819 | 38.9534635879195 |
|        | 40.4639532172338 | 41.2567470068038 | 39.6535880152834 | 44.293922970134  |
|        | 41.3803269429468 | 39.7835513496873 | 42.357910063876  | 37.2810767789306 |
| ILD1R  | 90.5503099572843 | 139.022985518859 | 206.989423961124 | 36.9912468186322 |
|        | 95.4533981420022 | 37.2686490268265 | 134.713725350463 | 78.8250642061439 |
|        | 129.37368123079  | 188.533240079423 | 165.598854278557 | 126.620595729562 |
| ILF2   | 1285.49870339222 | 954.116675685628 | 1285.49870339222 | 741.908952472992 |
|        | 2122.39240932934 | 761.922486104216 | 1204.34388579291 | 1969.8871504719  |
|        | 1167.25317435052 | 481.492404948275 | 462.362735276132 | 677.855726232203 |
| ILF3   | 111.845105854608 | 220.85458646522  | 182.905368976291 | 162.401599565682 |
|        | 335.002151198999 | 135.889195284785 | 216.102691704365 | 186.655552987116 |
|        | 174.263925108623 | 160.360785581153 | 172.433936159136 | 141.649461526745 |

|        |                  |                  |                  |                  |
|--------|------------------|------------------|------------------|------------------|
| ILK    | 315.960715273629 | 264.718875269207 | 305.048508698231 | 336.159430045964 |
|        | 194.278792348966 | 822.822769402853 | 211.279069257808 | 190.993853866124 |
|        | 223.168185178205 | 841.316771679857 | 666.265306908449 | 580.109585240053 |
| ILKAP  | 102.717305041352 | 85.2598847559951 | 93.8361140725228 | 98.4636016442768 |
|        | 67.0163226819964 | 104.129763935677 | 104.462230406058 | 109.922909644299 |
|        | 114.520410790135 | 130.691004726616 | 128.219615202232 | 101.403739410832 |
| ILVBL  | 363.215063520042 | 592.989860385203 | 703.315796616275 | 236.536058101486 |
|        | 320.330057050615 | 256.766675299448 | 262.624624672404 | 332.933704863586 |
|        | 634.226367147025 | 494.300858189605 | 429.329962597147 | 321.949943388959 |
| IMAA   | 8259.38594893529 | 6089.64191751349 | 7562.42822724655 | 7235.0789252269  |
|        | 5855.6498679729  | 4235.59743465057 | 7168.83136860899 | 6186.45345364665 |
|        | 5566.52516420571 | 6873.84878164654 | 6134.89208517976 | 5971.45293864208 |
| IMMP2L | 82.4263339218052 | 99.6265783263109 | 138.568626520133 |                  |
|        | 58.3475983630509 | 94.5055588176321 | 145.741469970609 | 81.6458112867541 |
|        | 106.78552222475  | 126.826715174564 | 111.771533072688 | 98.3322659713024 |
|        | 135.527591897994 |                  |                  |                  |
| IMMT   | 225.300736968225 | 243.803668806533 | 209.89649461562  | 255.800286504974 |
|        | 189.890451486324 | 240.696431900526 | 245.691073028699 | 257.325282051981 |
|        | 331.591589534469 | 296.664472126617 | 316.604316194398 | 337.948887427898 |
| IMP3   | 1041.84536202049 | 1457.72260892651 | 678.996864855592 | 658.282562295783 |
|        | 2232.61002288121 | 765.145138238955 | 1425.37639004849 | 1083.50383916482 |
|        | 1693.5377672895  | 883.06773454117  | 917.179747195874 | 872.305108096296 |
| IMP4   | 648.380417557148 | 932.849256536912 | 946.081492716653 | 738.059797123491 |
|        | 1664.00821059181 | 680.837950890159 | 826.024359447649 | 985.328482076985 |
|        | 759.184121753305 | 653.089523541803 | 775.931494648677 | 843.078502001733 |
| IMP5   | 36.3649677956953 | 42.2577689927563 | 41.9666541498638 | 44.265834798964  |
|        | 47.4548471240051 | 45.0882356578404 | 44.2166118829877 | 47.0940613507321 |
|        | 43.1805016690297 | 39.1621898366355 | 37.4642807402741 | 40.3691324547049 |
| IMPA1  | 91.2297566574871 | 123.176449895397 | 95.6182216943758 | 107.637618676176 |
|        | 125.786923817078 | 98.8478655411492 | 108.945545005203 | 80.5508300225954 |
|        | 107.961407367823 | 119.545018066492 | 116.882934971483 | 146.997252473598 |
| IMPA2  | 219.737294408079 | 119.176103802958 | 157.774096599452 | 166.304210248623 |
|        | 189.425423538906 | 768.354209323884 | 536.73426937255  | 258.446095955014 |
|        | 356.025084823326 | 286.758099833009 | 430.868309653765 | 589.685739519627 |
| IMPACT | 41.0608773166058 | 43.5182502375207 | 39.4710743516517 |                  |
|        | 42.992884918158  | 41.1507980856436 | 47.9503724044453 | 40.968974769473  |
|        | 44.5029690493211 | 48.8524897151151 | 43.4544762830742 | 46.9919960628953 |
|        | 45.6233434183356 |                  |                  |                  |
| IMPAD1 | 124.041740442038 | 122.292794686468 | 95.3754438202863 |                  |
|        | 90.0942781313264 | 145.77302334589  | 86.1633564934019 | 135.866407965991 |
|        | 110.09868737254  | 138.362914843774 | 67.1278109419819 | 82.3364971911816 |
|        | 90.0223113095186 |                  |                  |                  |
| IMPDH1 | 134.936657884035 | 117.811967515956 | 133.38594323309  |                  |
|        | 183.028254350275 | 118.720812623965 | 114.389392280707 | 142.714450804595 |
|        | 87.7295604723036 | 152.679927202674 | 81.6508259258669 | 68.3799828461475 |
|        | 102.605473054584 |                  |                  |                  |
| IMPDH2 | 284.66531382201  | 732.454837219705 | 997.492549573274 |                  |
|        | 227.817928402227 | 1521.20630233299 | 700.010354583503 | 679.309039810384 |
|        | 347.829279462722 | 682.227514643175 | 977.776395810338 | 686.154904023493 |
|        | 975.02086340962  |                  |                  |                  |
| IMPG1  | 40.2087556903277 | 39.0102066700839 | 40.9818899755491 | 38.1421709520616 |
|        | 37.4470183315826 | 39.1664256481434 | 37.4386615664066 | 42.4580504587581 |
|        | 37.3043739460234 | 41.5804111566887 | 40.0766543123257 | 41.7072675309997 |

|        |                  |                  |                  |                  |
|--------|------------------|------------------|------------------|------------------|
| IMPG2  | 53.6741873729867 | 42.7775752471711 | 49.6347864008749 | 49.3654837541353 |
|        | 42.1650127805175 | 41.9543948167375 | 52.2476631126873 | 47.9942520395434 |
|        | 47.4699236780425 | 46.5650556481721 | 50.5810338885769 | 46.3411353377615 |
| INA    | 325.769076169162 | 628.84789420227  | 285.459248157609 | 39.2780515621926 |
|        | 416.052744271365 | 86.6246917308185 | 641.103199748891 | 194.666769955149 |
|        | 495.26603220907  | 195.482216656634 | 147.388500451427 | 84.3464768820344 |
| INADL  | 92.2857885595617 | 59.046385957117  | 79.4998723172096 | 40.1272810917202 |
|        | 56.8307116636372 | 47.0940613507321 | 59.8273072817267 | 45.6941710526465 |
|        | 101.627551729492 | 131.195005779516 | 80.4554147910354 | 90.0942781313264 |
| INCA   | 46.5549623118323 | 40.7952353240579 | 41.6977706798234 | 52.8502823653368 |
|        | 41.3755760434934 | 35.7034203372528 | 36.5352572191451 | 42.2577689927563 |
|        | 45.6582729799009 | 33.9967481174035 | 43.5710871617107 | 42.357910063876  |
| INCA1  | 46.0920218698606 | 42.7775752471711 | 33.281531405287  | 36.7892997857376 |
|        | 39.1650142708257 | 38.8336427948187 | 40.0052661202207 | 40.047314525032  |
|        | 39.0775870687758 | 38.957687788868  | 36.7283081422707 | 33.1559412791294 |
| INCENP | 74.2653431904071 | 71.0340758556049 | 55.5567699051046 |                  |
|        | 52.3004056941891 | 127.008218054726 | 50.560825686187  | 75.7969486011633 |
|        | 79.6133633483649 | 67.0695260207402 | 50.8388984085636 | 45.4799270968969 |
|        | 50.4168556990205 |                  |                  |                  |
| INDO   | 90.6805895192707 | 65.5367689605146 | 72.4913548133238 | 232.13042919324  |
|        | 53.3086645804786 | 45.3882138838137 | 48.0283573444179 | 72.5835488194631 |
|        | 68.5599263000733 | 38.3092241935352 | 41.2598458726002 | 40.9683275553869 |
| INDOL1 | 45.0985088502363 | 48.109747794187  | 48.1997158668729 |                  |
|        | 66.224559122062  | 51.940083408061  | 46.574682061365  | 41.5817737564592 |
|        | 54.5125550937898 | 48.9931786790166 | 45.7911932481722 | 43.1931731665131 |
|        | 43.3744503319109 |                  |                  |                  |
| INE1   | 40.7609952437622 | 36.6968906669565 | 39.991353369336  | 36.4564050256915 |
|        | 40.0599807618105 | 42.157627240486  | 44.7255207589606 | 42.4580504587581 |
|        | 40.4220196471124 | 35.7202909649682 | 43.4709415392696 | 41.863927676552  |
| INF2   | 185.94424664238  | 125.676172266736 | 200.615897175992 | 126.14245679817  |
|        | 65.8319449883221 | 95.4393274079354 | 130.72385089567  | 193.569399061809 |
|        | 212.062417120966 | 175.876518898179 | 185.667983376361 | 158.25602438933  |
| ING1   | 53.6396970125549 | 59.3845821287714 | 50.9612733880858 | 52.7924213633885 |
|        | 54.6089451252049 | 50.3245489035833 | 57.5685357492202 | 48.3119523820103 |
|        | 54.4912806027381 | 48.6705421229977 | 46.5650556481721 | 49.6203214143464 |
| ING2   | 101.877183008944 | 103.189199090363 | 140.853812988562 | 87.9098670472958 |
|        | 106.58628367621  | 128.126336084436 | 127.655537534156 | 75.3761360028971 |
|        | 142.262349841307 | 74.3482661085192 | 85.3930226794591 | 100.151116279734 |
| ING3   | 66.2154717217675 | 83.0316824964745 | 71.0820747228972 | 98.3142231283069 |
|        | 67.3136079922956 | 96.4913003384143 | 65.5800543140431 | 57.6034762511847 |
|        | 81.7566533443175 | 73.5657748119622 | 79.4158467034017 | 67.8335962843732 |
| ING4   | 57.2008272301399 | 48.6184776976167 | 61.2153068100932 | 50.3127977239083 |
|        | 54.4586176399381 | 54.0969604236265 | 64.9191509252662 | 69.7729022157455 |
|        | 56.0286903335634 | 68.75304552302   | 58.6010484516703 | 52.8974363028468 |
| ING5   | 43.4100411978366 | 43.9783383422823 | 43.8052993451586 | 48.9482359914659 |
|        | 43.1826328292558 | 46.5578790409334 | 43.8206425661746 | 40.3357777530419 |
|        | 43.6269210434851 | 41.4659679379482 | 39.5399188536544 | 45.4164642922183 |
| INGX   | 40.6559419616644 | 42.2577689927563 | 41.8751578329365 | 42.357910063876  |
|        | 36.9060997041453 | 40.650742261428  | 46.1634822993009 | 49.5185112777773 |
|        | 41.3803269429468 | 42.1622837416589 | 44.2142581488029 | 42.2577689927563 |
| INHHA  | 41.9407041937973 | 40.5400384479766 | 38.6727842796202 | 42.8235313007746 |
|        | 40.6723334103791 | 41.2567470068038 | 43.9450023643394 | 42.7431359850339 |
|        | 40.6957787921451 | 38.4187686307607 | 38.745552403895  | 37.9607839934735 |

INHBA 39.5676051939342 38.0226905622357 33.281531405287 42.2496337895968  
 37.5556299264699 38.3418933808844 35.6056062164318 40.831207953647  
 43.3744503319109 36.4651112441576 36.131485826118 39.2469742642337  
 INHBB 73.9192243586276 58.1027665533767 83.955786676926 57.0629653735694  
 70.7760293129408 82.3364971911816 52.8496345990125 78.8250642061439  
 50.5785738734431 54.1683282066029 64.0541263553251 80.1461294346211  
 INHBC 38.5648843914189 45.0115870036541 45.7968648044613 42.8235313007746  
 42.269054475455 38.3418933808844 46.5650556481721 42.6450179841129  
 42.9020321355927 43.9450023643394 41.9908237694988 38.9496515344837  
 INHBE 36.8072833828297 38.2263227947189 36.3604951341921 37.29566077996  
 29.6891949090828 43.8582747295766 40.3302268293707 35.9023742468744  
 44.1519466943185 36.4651112441576 44.4688999098904 37.4554876386402  
 INMT 66.3095900379311 52.4351670989268 51.223859150798 63.7909104347097  
 47.5647821785529 165.322633260592 39.3585350448719 62.4219686957673  
 44.7058233759912 155.406719968961 109.844156801015 93.0092452285816  
 INO80B 73.8374823243007 76.2478685333968 66.5285423077808  
 70.2541961995753 76.301438841111 65.3096524773304 86.2118355769367  
 87.4850071876743 71.0820747228972 76.3583555666815 82.0206083292981  
 61.9882398986333  
 INO80C 112.351686948586 301.867441371793 290.761706869722  
 153.037055310357 146.483908799607 136.517445122438 168.145003400654  
 145.791398829369 352.019218177371 223.040734249612 243.403622361932  
 226.090904721424  
 INO80E 191.503068870249 182.905368976291 271.813877560354  
 145.391705645319 267.359645500185 205.279698624867 212.664574366477  
 309.344766670365 127.974232708236 234.333935191237 216.1413998895  
 183.364949777567  
 INOC1 68.8005532048281 69.7855392178808 59.8838591118356 76.9373289454707  
 81.6099927983382 86.3888090084564 78.8250642061439 81.3978207813439  
 76.4796910268368 87.3815040456105 91.8414653633828 74.5528557785378  
 INPP1 175.632783805966 268.265540230814 437.84407370064 198.951182954651  
 468.381233506231 263.799439226561 254.472291205905 245.127632785841  
 555.910110984847 525.687522832693 511.261925898948 606.378839153932  
 INPP4A 48.2910530887214 47.2354741623061 44.3635754464295  
 41.3027031037343 48.8381507187986 44.2607789091176 46.4838970014049  
 57.6234624694326 47.0027453663546 40.9607305725196 47.6333826891425  
 43.0930293831497  
 INPP4B 77.7665223272661 139.311807081199 187.002948435359  
 80.7168944828052 115.132600341395 62.0660509811111 89.4747568145717  
 89.0275988550016 182.219366179899 96.8240908274121 93.5982028088194  
 168.561260174501  
 INPP5A 72.2797007105795 122.924027019519 108.512469038407  
 79.3614922672599 112.753674408958 195.968119243879 95.4764015137059  
 80.1144023887293 84.2880616879945 146.691463448295 162.721587349434  
 115.970093171058  
 INPP5B 78.5216977073842 75.7801512652102 73.845912534353  
 79.5838979704243 70.3677225924146 90.8335894699136 71.6890300780549  
 110.599131324937 72.1591028956359 88.9738853594498 101.434947182387  
 78.7496673195407  
 INPP5D 75.8976034525022 84.7222416138393 121.737071786167  
 99.4184778430267 49.9493230064613 66.5234828659154 48.9826868640753  
 80.5508300225954 56.8622704143595 70.7003843117511 66.6118713143653  
 63.4685821260797

INPP5E 184.162452344446 126.253578620746 62.5610562594275  
76.6232527679845 153.920604317629 87.539553421006 180.902423012987  
73.0394191668858 104.00520458442 107.792406701643 76.7063975550116  
91.6328359149182  
INPP5F 49.9791966667317 49.2443202281556 46.1335462158451  
56.3441077510744 45.8051846088552 46.9395507483816 48.3411413510851  
45.0693869004277 48.5238922337712 50.1059857872211 46.5650556481721  
47.7390230243778  
INPPL1 843.333981146512 384.919835924792 474.379113836506  
289.332274319357 583.421166842011 335.569876624791 648.885062676884  
740.994425128952 385.675278463448 433.767439244344 513.266895252699  
376.453560620912  
INS 39.9697332660833 39.1982470626863 44.2405728317107 45.4634652319753  
42.269054475455 41.2567470068038 32.8745892439217 40.3357777530419  
40.4220196471124 43.9450023643394 43.401782064778 48.6037684272115  
INS-IGF2 41.9407041937973 50.9643363406241 87.3634135323569  
40.8084239472012 72.828269171954 45.6706505553383 38.2933870238743  
35.1738399826814 32.325260431418 40.8970401536578 40.0766543123257  
36.5219488315447  
INSC 38.6213341190836 46.0713306971594 42.108130037421 38.745552403895  
50.4260283682427 41.6590564937735 45.1017494688414 40.5158867964016  
39.0458123429605 42.8936990772838 41.0476065156912 43.3262148375525  
INSIG1 108.734392572981 118.288549974348 89.7002002853947  
304.33749254654 96.8490167966217 147.093338225478 129.2860308084  
223.531821464447 354.158105175308 65.813547096222 132.090336898032  
119.124583755587  
INSIG2 323.780380243759 199.208033538936 151.067886009549  
239.425856083354 171.597378768542 178.904972763325 138.923143963742  
127.596368103014 293.410413883219 142.846665249354 155.617122020913  
224.976641879383  
INSL3 43.6706764143908 40.5400384479766 49.6347864008749 47.0874209746031  
39.2608760193011 45.2852528185486 41.5817737564592 43.1567024035183  
38.3418933808844 38.6454098044474 35.7953070087288 38.4330755397458  
INSL4 42.2455707947223 40.7952353240579 41.437237454134 41.0726336841311  
45.2556760873335 37.8102105794655 39.2533668167483 37.0390589468421  
41.1742244762318 38.6454098044474 42.7275315121163 45.2783024981315  
INSL5 44.436995101921 38.0226905622357 42.640829914102 40.7481155008596  
38.8456942580061 37.2686490268265 40.6750540874299 43.1567024035183  
45.5779686360641 38.1042454705119 41.9908237694988 47.6040671292013  
INSL6 43.7920955808549 121.8863522969 44.5544727111028 45.1944222548351  
39.2968590261598 44.812853905056 42.4939802311136 42.357910063876  
42.9413736814915 37.3179578037963 45.6706505553383 43.4290452504928  
INSM1 57.8765910878975 47.8400694856726 41.6977706798234 44.9370339275041  
44.147557390293 44.4619248757502 40.6750540874299 51.0724630072723  
48.8842909466002 45.1569741609597 43.0016969050339 53.3904307221902  
INSM2 44.0328992213727 37.7384958256497 46.0727230219512 49.3654837541353  
40.5710637884029 39.4953494583071 41.1507980856436 38.4540849632254  
41.3803269429468 37.0320432433314 47.3791873993182 49.904979214379  
INSR 36.8072833828297 36.6002100641539 38.3166554965434 43.8002456102021  
38.9496515344837 42.357910063876 37.6036146841933 41.2551966132486  
38.9006788676407 35.2880714952489 42.7275315121163 37.9607839934735  
INSTR 40.2543341073001 39.7835513496873 37.7384958256497 36.4564050256915  
40.5710637884029 35.8227939208521 39.3585350448719 39.853866204927  
38.7298222155532 41.7405682794166 37.7384958256497 34.0382693188794

|        |                  |                  |                  |                  |
|--------|------------------|------------------|------------------|------------------|
| INTS1  | 148.925503526873 | 157.615972646659 | 162.151812425949 | 121.423421895502 |
|        | 198.226275659825 | 127.49459343016  | 183.431582521592 | 201.427008153788 |
|        | 151.775928080246 | 170.150808455621 | 152.329124189473 | 105.796515736125 |
| INTS10 | 330.168672676816 | 174.537032518715 | 235.925374041038 |                  |
|        | 250.210134743225 | 168.75362473684  | 312.40869171788  | 250.176074707634 |
|        | 150.405742308999 | 280.159844300266 | 389.364650157102 | 380.278389209918 |
|        | 362.268767190535 |                  |                  |                  |
| INTS12 | 234.495626550751 | 224.412339736769 | 231.778951567627 |                  |
|        | 281.262083731954 | 215.504612948048 | 244.466972245417 | 247.193935816149 |
|        | 171.705718494906 | 271.478148993789 | 164.580141651883 | 165.942795019496 |
|        | 231.085533860683 |                  |                  |                  |
| INTS2  | 56.5094373275922 | 82.2766822827861 | 76.0240426902567 | 76.450993090133  |
|        | 85.7842344710572 | 62.843734579668  | 83.0647477737971 | 53.9465584609317 |
|        | 80.8728961146267 | 63.197604174872  | 78.7260936224802 | 71.8539743926881 |
| INTS3  | 365.401746744015 | 319.408264906288 | 413.516548092483 | 222.985386635178 |
|        | 576.830397705584 | 318.995164994001 | 351.637117984528 | 633.385474385877 |
|        | 307.974082654351 | 512.255695437272 | 516.992846073349 | 474.729653426958 |
| INTS4  | 82.6602736441839 | 97.9004351588426 | 111.320157744612 | 111.703187941409 |
|        | 105.406282523992 | 104.409397223301 | 105.802035886293 | 93.0474674148534 |
|        | 89.1217605204013 | 99.9057667432209 | 90.3531863862054 | 91.8251275769679 |
| INTS5  | 139.436084808369 | 101.277664841914 | 130.703767898434 | 100.344513700137 |
|        | 229.992809034971 | 96.034706957068  | 158.862722884436 | 153.037055310357 |
|        | 171.938863440177 | 114.321083441061 | 127.345094323724 | 96.5813769696577 |
| INTS6  | 85.9392883641626 | 122.405413080836 | 113.454378667943 | 238.616000665585 |
|        | 110.869341159607 | 109.943883439481 | 107.015362116555 | 144.515737827731 |
|        | 143.517244617936 | 139.814194128548 | 129.697400781396 | 146.046179302584 |
| INTS7  | 68.9745034946434 | 64.0903425729408 | 62.0967404944031 | 53.0284011078097 |
|        | 53.4109882045447 | 51.4931742685391 | 66.0350709576651 | 60.419911425109  |
|        | 71.9771425105735 | 51.1169368198437 | 57.0690683036183 | 52.3896785600751 |
| INTS8  | 93.7352369697358 | 89.5887648181505 | 79.7733480606334 | 62.6048727240291 |
|        | 122.316617618658 | 67.6817814091697 | 74.5591290353333 | 85.2849531543957 |
|        | 133.842824493862 | 90.6805895192707 | 70.7760293129408 | 86.2974544521879 |
| INTS9  | 197.515728627482 | 171.992427227088 | 249.308868215205 | 185.924923239764 |
|        | 167.943170737481 | 195.168348967505 | 209.068725760522 | 117.612004923867 |
|        | 193.094756585577 | 239.023368693467 | 279.448591201269 | 235.075347885884 |
| INTU   | 64.3173126779926 | 77.8220670093392 | 64.9839099669442 | 46.614092935749  |
|        | 67.3568864741196 | 57.8944021095265 | 58.6431245059655 | 49.1399035787209 |
|        | 55.1253465069845 | 77.9085946827079 | 68.3419511055057 | 75.6428949408034 |
| INVS   | 61.1630754250653 | 64.6629780915974 | 52.1024135605001 | 55.0604256312495 |
|        | 55.9283039581662 | 66.5500089527674 | 61.2822647324366 | 62.1934012861178 |
|        | 51.7098181032862 | 54.4825201506931 | 56.9320717885002 | 64.0541263553251 |
| IPF1   | 42.3433931248155 | 45.3486182278177 | 42.2577689927563 | 40.1804147506786 |
|        | 40.3452320167286 | 32.4301586830653 | 50.8388984085636 | 41.7419877611072 |
|        | 42.7150227340364 | 40.2112371512838 | 42.4580504587581 | 42.2577689927563 |
| IPMK   | 36.6480005877129 | 37.8217989841918 | 36.4564050256915 | 36.5393857306744 |
|        | 42.3685136297603 | 41.8613406887824 | 38.4005795891396 | 37.6557714476853 |
|        | 39.0775870687758 | 36.9102644736882 | 32.406093465115  | 40.0557788909923 |
| IPO11  | 294.155188719236 | 293.410413883219 | 319.328571608303 | 373.547403496629 |
|        | 275.846698617064 | 356.628599887098 | 288.447603611962 | 334.170764774986 |
|        | 328.855843739232 | 389.481124074714 | 325.450452751375 | 293.040690378216 |
| IPO13  | 138.50445813694  | 83.4951332849212 | 91.3890908971311 | 75.2475238554276 |
|        | 112.990752518897 | 95.5022104475922 | 94.1289383735162 | 167.034910927177 |
|        | 131.068763088422 | 126.546330358591 | 104.626873082138 | 89.6670947876322 |



|       |                  |                  |                  |                  |
|-------|------------------|------------------|------------------|------------------|
| IPO4  | 148.016994658777 | 120.3698209682   | 115.256208610595 | 92.4781449270918 |
|       | 184.50283792606  | 107.91849682084  | 86.5564881117807 | 90.3916996175708 |
|       | 108.937199348319 | 72.961444366037  | 80.6550905475507 | 70.5322939116406 |
| IPO5  | 90.9521112485099 | 73.7873098190297 | 73.6323065529916 | 75.0377156190383 |
|       | 115.827601697699 | 155.270252661048 | 83.6935756500468 | 54.0507720792049 |
|       | 74.220854748627  | 77.6056319020116 | 83.9236799134394 | 111.166893747402 |
| IPO7  | 46.9939712192224 | 58.4891791448514 | 47.2962360458401 | 53.9517841438975 |
|       | 57.4163094213712 | 107.034189847828 | 47.2927436772465 | 55.5578334877425 |
|       | 71.787754116845  | 46.2286164776607 | 57.2008272301399 | 86.4498396868205 |
| IPO8  | 119.993761317523 | 98.9017950719795 | 175.362103430164 | 114.876346000655 |
|       | 58.037539503209  | 230.554867472663 | 126.930102684077 | 66.5234828659154 |
|       | 85.6441969757275 | 143.894266185526 | 89.5887648181505 | 226.235985918654 |
| IPO9  | 127.352997770688 | 114.617965877564 | 126.578693258328 | 94.080489738662  |
|       | 145.083624161597 | 103.734064904898 | 160.015674121695 | 118.600699776727 |
|       | 123.480244775709 | 79.7389069715403 | 92.0711167984454 | 89.8035133597498 |
| IPP   | 85.2893380711323 | 71.4197504261453 | 63.2475738480323 | 54.8412943008635 |
|       | 46.6397391251762 | 77.2834482217973 | 58.2315917325629 | 112.613079254002 |
|       | 69.6511571901941 | 102.38706554984  | 91.2202310968307 | 83.1874704625702 |
| IPPK  | 57.7877627794725 | 68.0388928513985 | 54.9071823326024 | 60.1837189855762 |
|       | 58.9875400392427 | 60.1042270393382 | 58.0139597055449 | 51.7538628098347 |
|       | 54.998510746958  | 54.0374522273907 | 53.5698357689852 | 52.9609836781499 |
| IQCA1 | 50.4260283682427 | 44.2630383225933 | 121.214084453032 | 50.2163892855092 |
|       | 146.311363191836 | 55.7868713984479 | 37.6036146841933 | 43.1567024035183 |
|       | 41.2424637338424 | 72.5918913856713 | 71.3932787152381 | 79.4710406831985 |
| IQCB1 | 100.765131355505 | 102.020047144427 | 111.025105784166 | 100.654701845984 |
|       | 112.60230393988  | 87.3429006429216 | 132.24963384417  | 84.3526980051279 |
|       | 104.480361196422 | 90.3439862484238 | 86.0709878693269 | 98.2581979415778 |
| IQCC  | 44.0328992213727 | 44.9370339275041 | 49.5424425850549 | 38.4208429103799 |
|       | 59.9326265577462 | 43.2805590023412 | 55.9276266345493 | 52.1788489555942 |
|       | 49.3780606970538 | 53.5498255316009 | 45.390192977585  | 37.7526485343328 |
| IQCD  | 54.5358897781765 | 39.1982470626863 | 41.9666541498638 | 44.4367387274922 |
|       | 39.859345745831  | 44.4619248757502 | 44.0687697278114 | 60.0835531094681 |
|       | 45.7452456977857 | 46.0119912782855 | 42.0750889188255 | 51.138877923954  |
| IQCE  | 47.6397712007919 | 44.6918600441328 | 42.4580504587581 | 41.0726336841311 |
|       | 42.7107928951766 | 45.8325181856483 | 40.1235656101329 | 44.2159020605784 |
|       | 45.4799270968969 | 49.0841460667818 | 47.2134341420411 | 46.5650556481721 |
| IQCF1 | 39.9697332660833 | 35.4484652445078 | 41.1367478979484 | 40.8681871019812 |
|       | 42.7982502551634 | 40.1428591998404 | 41.706879587091  | 41.6466169548846 |
|       | 40.4997186069494 | 36.4651112441576 | 41.0808257270221 | 40.6614700944853 |
| IQCF2 | 43.3638918705225 | 38.7344853699576 | 40.301483914446  | 49.3654837541353 |
|       | 38.2496050953547 | 43.3785777889265 | 40.4359177791566 | 45.5581356216957 |
|       | 44.8003345643334 | 40.4136535208406 | 42.0750889188255 | 43.1805016690297 |
| IQCF3 | 43.5710871617107 | 38.2263227947189 | 40.0998167098057 | 47.8164193292842 |
|       | 39.9697332660833 | 44.1737502492846 | 41.253645578517  | 40.5158867964016 |
|       | 39.0775870687758 | 39.9948390976317 | 41.1638563416981 | 40.0557788909923 |
| IQCG  | 50.2203578628217 | 48.7847528954724 | 56.0477607422828 | 54.4586176399381 |
|       | 43.2484996523549 | 57.4777075615651 | 48.9826868640753 | 57.1362071277099 |
|       | 44.619512785899  | 47.7180816682562 | 50.7903824729818 | 57.0524725494273 |
| IQCH  | 40.5235471987417 | 40.6380495994768 | 40.301483914446  | 38.042028333747  |
|       | 41.2740822675592 | 39.0266821712099 | 41.0871827071116 | 39.512606833112  |
|       | 42.2577689927563 | 38.8507804383261 | 42.7275315121163 | 38.8834538955    |
| IQCK  | 94.2762661604561 | 128.766242896259 | 151.740176274202 | 95.0873056549336 |
|       | 104.704892803169 | 120.618530729822 | 101.250422688816 | 139.294987640071 |
|       | 81.7566533443175 | 138.401109242778 | 140.51841571801  | 137.976238593619 |

IQGAP1 235.127539195661 179.605537867711 117.869393694564  
 264.263104842911 105.945216149549 257.851199206959 146.534713287435  
 183.086707591185 167.799243454967 214.927272114101 184.964039515715  
 267.70610731202  
 IQGAP2 66.7759319948677 51.8610060995363 50.0748292497578  
 150.082905944963 52.6922486991742 78.3488426553071 51.7714254834195  
 73.362936710475 53.0357938671646 50.22432299342 48.1352470945488  
 61.0025829061063  
 IQGAP3 41.3387790895716 49.2050538150106 53.5698357689852  
 40.8681871019812 49.1928206164702 49.5424425850549 59.0457625163577  
 44.9977782988116 50.1603795873336 40.7063426028871 46.2560238004757  
 45.9693232070002  
 IQSEC1 152.21278457652 115.221134337342 117.228320608065  
 305.619340338331 166.168385855406 135.985408824299 107.015362116555  
 174.148714092395 86.6516906104905 136.20629436945 120.046457114882  
 113.491158368594  
 IQSEC2 66.7759319948677 56.2305155589239 74.0913177754682  
 73.1447139654971 58.2780916793348 59.2643906275025 73.3042538589134  
 68.1311562787361 74.6277165793069 91.8251275769679 84.1922656126304  
 69.6021553604792  
 IQSEC3 44.6231541342 45.6533175604486 46.1987217359283  
 42.8848887336829 42.9090346219023 44.0804700754786 46.9929836306816  
 45.2806199505029 46.9062313932642 40.1179210534118 40.3452320167286  
 39.8497227447888  
 IQUB 37.8386378737561 42.4493032770053 34.8956628705329 34.3595588146954  
 39.7568367479301 45.8325181856483 37.1643693306382 41.8417024632349  
 39.7537274655115 41.1222709786153 40.4504608195666 47.3992733452821  
 IQWD1 128.521748930472 123.039116845742 245.923368125413 115.195645860902  
 193.806701229141 181.814283147675 103.657181265842 111.643323610073  
 135.41852974791 112.316483867372 134.853649092952 158.918242816842  
 IRAK1 303.323289734056 304.41727337972 245.853111206859 438.22469176123  
 865.63777294494 261.195021649777 348.450810225807 444.471597593258  
 290.087040648659 193.15756263121 192.171116215791 212.622278823808  
 IRAK1BP1 44.0707087774725 66.9218519793499 56.7272804480684  
 51.1313686723929 44.8351976221735 58.8090653936339 61.5635554619635  
 54.3820590274321 65.429256309049 51.0055825931636 52.6547683625018  
 57.8111054584154  
 IRAK2 110.362432903746 114.056623754207 317.245171206724 654.682263833024  
 602.441843384617 117.019543736429 254.472291205905 557.455966274117  
 221.910075604221 527.439095170064 460.340300658834 615.838713743621  
 IRAK3 72.3388488936832 48.3077814647455 72.9051985681184 718.414652618295  
 53.8260140375214 94.7008981904016 85.5027511448958 55.6904617926772  
 52.0583273941813 69.4131195465674 62.9336909080086 86.6105153696374  
 IRAK4 81.2359429678503 79.1822591641672 96.6895594961001 116.295564219236  
 49.0828761839116 70.5699797830702 76.7483302168542 98.0352049248004  
 97.2425832658887 67.8233625051884 75.0704619826557 86.6854406823303  
 IREB2 108.734392572981 157.250548147161 119.634256037186 179.322661675979  
 196.29493890075 363.947777340854 150.562062400737 129.925137664962  
 158.308338986864 203.152852313746 250.832808506455 201.711142068161  
 IRF1 366.915943380617 451.364230598722 296.271895016431 818.927157206447  
 147.945429978177 314.36962447353 315.592187396219 276.795797048951  
 336.44013572926 104.928805304068 170.307603160524 159.306689057291

|         |                  |                  |                  |                  |
|---------|------------------|------------------|------------------|------------------|
| IRF2    | 46.0023068797812 | 50.6526511991732 | 47.2962360458401 | 48.055683217958  |
|         | 45.7452456977857 | 51.702461863489  | 50.8388984085636 | 43.6434576713809 |
|         | 50.9010149857308 | 49.9493230064613 | 52.8297102061403 | 50.0571060701893 |
| IRF2BP1 | 100.057155418659 | 68.2521461582047 | 77.6971278685226 |                  |
|         | 69.1931891474114 | 84.2158827857221 | 66.2167164788023 | 83.374777060444  |
|         | 103.366147685418 | 115.88156897199  | 136.859309317164 | 109.844156801015 |
|         | 70.9377012403023 |                  |                  |                  |
| IRF2BP2 | 123.46775722643  | 132.52749757795  | 133.47090252916  |                  |
|         | 170.901596796384 | 165.613176704286 | 171.302214895226 | 127.588471566929 |
|         | 118.783682318205 | 170.287619901365 | 99.0596863442346 | 113.322929203297 |
|         | 97.1634390603131 |                  |                  |                  |
| IRF3    | 144.063191647372 | 170.20428461603  | 237.161912299581 | 150.529917336161 |
|         | 277.5073518536   | 118.089250727398 | 195.512986297442 | 187.189412320761 |
|         | 202.578421978121 | 227.686495419561 | 270.036719921343 | 208.878921620914 |
| IRF4    | 39.9697332660833 | 46.0023068797812 | 43.3085358214154 | 47.9915414951747 |
|         | 37.2567512265363 | 44.4619248757502 | 40.5585676679482 | 45.4757965005055 |
|         | 41.6616444147804 | 38.6454098044474 | 35.2339574411711 | 35.3525469364579 |
| IRF5    | 71.0733129130898 | 86.9329220905001 | 65.0359415104302 | 59.7240416362194 |
|         | 67.2779942308321 | 51.8812208789107 | 80.4113521705019 | 41.7877325563821 |
|         | 59.5093038629766 | 56.1912096308988 | 45.9104478407175 | 42.4229201717624 |
| IRF6    | 89.8234189405239 | 184.218705402964 | 267.608189207303 | 61.141483572676  |
|         | 186.795349445177 | 80.9160262677505 | 336.490083577377 | 166.208731611481 |
|         | 289.25391828279  | 228.328635242684 | 229.130963999337 | 218.446312290024 |
| IRF7    | 65.2001674269291 | 135.436347750159 | 123.729687262037 | 285.459248157609 |
|         | 87.5074297754031 | 91.1271533616476 | 130.946383858668 | 95.3300728806601 |
|         | 74.6590272639023 | 75.5561597374812 | 62.9336909080086 | 74.1282220615085 |
| IRF8    | 135.323750661937 | 241.952522667413 | 136.456679728935 | 926.61614755153  |
|         | 72.6675345946258 | 176.43047680293  | 85.2088054619229 | 154.829574442056 |
|         | 44.5303781239209 | 67.9259304928255 | 62.7743500747415 | 76.6707262000712 |
| IRF9    | 759.184121753305 | 1069.3975598703  | 970.379875059112 | 826.490051619826 |
|         | 320.504100222566 | 614.807633538557 | 611.538630852232 | 522.49156295512  |
|         | 577.993850127555 | 508.688028777582 | 778.723771259404 | 491.8684831079   |
| IRGC    | 41.3387790895716 | 42.7775752471711 | 36.1042012504758 | 44.1483976313959 |
|         | 42.7982502551634 | 39.2985791324641 | 33.6696565339534 | 42.0494116081998 |
|         | 37.4540772310118 | 36.3612409063792 | 38.745552403895  | 43.5738557773903 |
| IRGM    | 44.0328992213727 | 43.4396866157171 | 47.0940613507321 | 50.7046706880325 |
|         | 52.2089306840125 | 45.1873487463472 | 41.8315602975157 | 46.1673159982664 |
|         | 44.8003345643334 | 43.844855336215  | 44.2142581488029 | 43.7672102682067 |
| IRGQ    | 34.4021554788966 | 40.5400384479766 | 40.5734458834617 | 35.8472302065546 |
|         | 46.1804647841331 | 38.2293008890613 | 39.0458123429605 | 42.2577689927563 |
|         | 37.4540772310118 | 41.4397539024976 | 40.0766543123257 | 34.4570158133896 |
| IRS1    | 91.31756001203   | 164.312946712409 | 310.763904671301 | 48.309866878365  |
|         | 300.762511215441 | 107.70358681113  | 111.714563124738 | 74.383456365584  |
|         | 327.984902171255 | 160.056757080676 | 176.816741656659 | 232.193215437232 |
| IRS2    | 99.6265783263109 | 86.7710020879725 | 60.0856496605043 | 694.590958116425 |
|         | 66.3075095149783 | 130.336599857526 | 79.2701322339022 | 80.8333046859586 |
|         | 42.7150227340364 | 126.071077511531 | 131.156876010639 | 155.050936910986 |
| IRS4    | 49.6241203903354 | 47.3536182445315 | 43.7630587657205 | 41.7614975630362 |
|         | 48.7288537840562 | 43.5752393599169 | 42.629412460409  | 51.4360013601805 |
|         | 45.6582729799009 | 45.6868589181768 | 49.6706535876636 | 42.357910063876  |
| IRX1    | 51.9545473262296 | 50.6229884142872 | 43.6670755115848 | 46.4555908533915 |
|         | 47.5647821785529 | 35.8227939208521 | 57.51482768194   | 53.2046867327331 |
|         | 54.8946088631931 | 52.7972156492746 | 56.0477607422828 | 52.5752569429057 |

|         |                  |                  |                  |                  |
|---------|------------------|------------------|------------------|------------------|
| IRX2    | 44.7044140979108 | 37.7384958256497 | 37.2838080935695 | 45.334106390212  |
|         | 118.376686726902 | 48.5835484742456 | 35.3362091871364 | 43.1567024035183 |
|         | 43.6670755115848 | 45.5776159432079 | 58.6464918752765 | 68.4278345554565 |
| IRX3    | 455.223217772744 | 274.962689159729 | 1261.91478863258 | 108.779357041421 |
|         | 379.377005627283 | 99.2749350936362 | 790.094848284547 | 100.370937669662 |
|         | 3761.48462220262 | 58.9836017745712 | 77.2834482217973 | 63.7744603935682 |
| IRX4    | 38.5007204246293 | 178.525751043592 | 43.0016969050339 | 48.856176220627  |
|         | 58.2780916793348 | 48.4758590019384 | 39.8695929627783 | 61.016921238986  |
|         | 52.7512110769042 | 36.8059561571675 | 44.2142581488029 | 44.2527566343661 |
| IRX5    | 45.7017023767682 | 70.0965466297064 | 62.1893884200745 | 41.8291484190524 |
|         | 47.8075998240396 | 43.2312848495114 | 51.3064929551674 | 37.1317006162938 |
|         | 95.2018660650205 | 44.3648993568405 | 42.8742421276144 | 43.1805016690297 |
| IRX6    | 43.4626049853157 | 43.9421822132391 | 40.4070046183108 | 43.8002456102021 |
|         | 45.3675390992851 | 43.7630587657205 | 42.7431359850339 | 41.1575777497576 |
|         | 37.0126425326534 | 45.1569741609597 | 52.104880481326  | 42.6758568421347 |
| ISCA1   | 71.2246788429078 | 91.4581948567397 | 59.8273072817267 | 88.4717765234098 |
|         | 88.1733775711738 | 113.759627906335 | 66.4958411147116 | 54.2301964914419 |
|         | 78.7543199947688 | 72.1451513995841 | 72.2377222744463 | 88.5274823465707 |
| ISCA1L  | 64.720130807316  | 71.9539136431119 | 56.4779645313958 |                  |
|         | 58.2401724760744 | 100.824660338235 | 91.640286556353  | 74.621822948059  |
|         | 73.8875154527631 | 79.8196996067124 | 54.0374522273907 | 67.3976855661302 |
|         | 83.5791586743002 |                  |                  |                  |
| ISCA2   | 116.426770366736 | 59.5534127075228 | 91.9375312869437 | 84.0899854321388 |
|         | 97.7153995525346 | 80.287662312208  | 82.5050369860039 | 66.9340967279385 |
|         | 94.2275161759277 | 77.9085946827079 | 76.375769561992  | 94.1128427766432 |
| ISCU    | 429.983084929605 | 633.385474385877 | 627.914461428624 | 635.906934423716 |
|         | 467.645011859047 | 895.735191953679 | 372.642038290698 | 358.979854534484 |
|         | 600.34379987143  | 611.538630852232 | 624.51670158046  | 667.583623414832 |
| ISG15   | 282.603767561794 | 838.974043046676 | 254.425072964926 | 196.247893540766 |
|         | 150.43149196048  | 126.981964766008 | 384.280434953152 | 983.200149701633 |
|         | 148.467977704907 | 98.0352049248004 | 145.09364961191  | 110.860844149372 |
| ISG20   | 134.113913870501 | 356.079406408042 | 316.660303090646 | 1561.83892117664 |
|         | 170.450752247109 | 144.046404221564 | 329.437593022939 | 285.626835802986 |
|         | 196.709620264975 | 88.0664425843955 | 119.209804934394 | 80.0381580139229 |
| ISG20L1 | 130.703767898434 | 135.997802304719 | 93.5717680539357 |                  |
|         | 117.228320608065 | 146.405413944753 | 120.980558571109 | 119.124583755587 |
|         | 149.792346524401 | 90.7037473522607 | 72.6549171886783 | 85.2598847559951 |
|         | 107.276913085701 |                  |                  |                  |
| ISG20L2 | 146.658116519622 | 243.489225650886 | 225.559405596065 |                  |
|         | 215.131274710043 | 235.222472959869 | 140.264270771578 | 190.960237766104 |
|         | 135.259585457958 | 133.244526666651 | 105.29989739819  | 162.721587349434 |
|         | 123.978615472736 |                  |                  |                  |
| ISL1    | 38.7537364570873 | 39.3999056968598 | 42.0621425894624 | 52.3004056941891 |
|         | 41.6806984441849 | 51.3886035574416 | 38.941855825269  | 42.5435283762933 |
|         | 41.6616444147804 | 116.311176407088 | 98.2581979415778 | 82.1365334012643 |
| ISL2    | 40.8681871019812 | 46.0713306971594 | 36.4564050256915 | 36.1562979552173 |
|         | 41.1868052124344 | 46.263826584899  | 43.1931731665131 | 46.5717043290731 |
|         | 43.4656637536244 | 40.1179210534118 | 42.8263096141654 | 37.8490162439785 |
| ISLR    | 254.159017331462 | 44.3088822189408 | 41.0752399035779 | 55.1149136190465 |
|         | 42.7982502551634 | 88.0664425843955 | 40.5585676679482 | 62.7515429046888 |
|         | 39.1433524273815 | 105.15507796881  | 73.0464199386528 | 59.6291051806275 |
| ISLR2   | 50.9381343674699 | 42.5269793679335 | 43.0971787292711 | 43.9282059368202 |
|         | 41.1868052124344 | 45.1873487463472 | 42.8684958525042 | 45.7476095696859 |
|         | 39.9444191873552 | 43.1839109702714 | 39.0550139257658 | 40.7704587752083 |

|        |                  |                  |                  |                  |
|--------|------------------|------------------|------------------|------------------|
| ISOC1  | 78.2644076847509 | 230.486681581762 | 170.527024636624 | 91.3144101155547 |
|        | 136.875335055866 | 95.0026207727863 | 118.27400376579  | 133.69701250532  |
|        | 181.844123841452 | 99.2432911346944 | 132.760054781304 | 213.711954283504 |
| ISOC2  | 122.136867360309 | 133.192618821838 | 146.658116519622 | 122.412295645862 |
|        | 283.747865829282 | 172.676819138152 | 148.016994658777 | 144.034489386072 |
|        | 270.156612086731 | 144.835567449189 | 163.844659359002 | 115.229070906222 |
| ISX    | 45.6517320730042 | 45.4882438975269 | 39.9101908547397 | 43.6726153508978 |
|        | 43.7517118200398 | 46.3715909653832 | 42.357910063876  | 48.9826868640753 |
|        | 42.992884918158  | 38.8507804383261 | 42.7275315121163 | 48.3648494350286 |
| ISY1   | 156.242688079359 | 208.67074469962  | 199.181938253995 | 259.958369064691 |
|        | 299.428590398636 | 247.298165265093 | 241.148224648134 | 141.572530741416 |
|        | 194.703024752864 | 155.01005229951  | 178.688550924272 | 173.212430860273 |
| ISYNA1 | 107.836867810972 | 181.420545696696 | 159.667153030627 |                  |
|        | 55.4180794172794 | 283.161835288074 | 75.2735539010032 | 131.39588569388  |
|        | 64.3284163241986 | 169.367702213351 | 161.870972980732 | 123.868848519181 |
|        | 154.08990201795  |                  |                  |                  |
| ITCH   | 94.696942512529  | 94.5261917871909 | 82.3344892042646 | 120.068630086702 |
|        | 78.3542840447759 | 103.139459009593 | 223.013058725367 | 140.559370165331 |
|        | 137.395516155158 | 206.989423961124 | 121.936597605894 | 159.12163104195  |
| ITFG1  | 168.737634511775 | 251.184621899165 | 384.727543700024 | 209.89649461562  |
|        | 131.496769528338 | 188.912691033518 | 114.056623754207 | 112.714318425036 |
|        | 174.350348527098 | 117.20232751191  | 135.92805172353  | 167.095818680513 |
| ITFG2  | 209.524518082089 | 246.568253751149 | 249.776078532596 | 160.973602503707 |
|        | 191.896416838806 | 221.015209694864 | 247.007210336963 | 229.745018977185 |
|        | 391.658764737446 | 289.25391828279  | 356.410753280729 | 194.570513601724 |
| ITFG3  | 450.271658272512 | 439.955651727755 | 468.573956652904 | 193.327267186222 |
|        | 241.736113354506 | 387.039093527273 | 389.481124074714 | 190.053043382767 |
|        | 517.664764759512 | 477.924466983414 | 396.493831159481 | 328.962069934895 |
| ITGA1  | 67.1387898740161 | 61.8492980174846 | 88.1797799963114 | 62.8201270538435 |
|        | 85.7842344710572 | 91.4446109489387 | 44.9863726205428 | 55.1933004802607 |
|        | 45.1899271235974 | 77.0226403968683 | 70.2215218476683 | 101.888001006345 |
| ITGA10 | 45.3872406432794 | 47.6914221838216 | 60.4809187893259 |                  |
|        | 91.5202521578181 | 47.2074332636566 | 64.9498081060676 | 49.3854238365325 |
|        | 48.5681478665796 | 45.5779686360641 | 60.4837400912239 | 66.8842530423095 |
|        | 55.4635297192076 |                  |                  |                  |
| ITGA11 | 245.060552951511 | 56.7569186600983 | 50.0487097583953 |                  |
|        | 94.9785931907153 | 62.5517224560726 | 73.0686482917042 | 43.0269218496197 |
|        | 81.8491450876942 | 45.5779686360641 | 66.0224755625662 | 74.8473087205709 |
|        | 48.7226309877005 |                  |                  |                  |
| ITGA2  | 97.7140868175135 | 152.187430924861 | 216.63059645927  | 94.4501786945034 |
|        | 137.965622805944 | 45.3882138838137 | 68.673864919178  | 96.7474444319428 |
|        | 149.040814842403 | 116.76301232629  | 168.67163443217  | 217.263889616995 |
| ITGA2B | 36.0144420013819 | 34.7135536792489 | 38.6727842796202 |                  |
|        | 45.1944222548351 | 60.8550020364269 | 31.1150868775826 | 42.0605906240248 |
|        | 39.9576138799997 | 44.4395580493118 | 42.1622837416589 | 37.9230440150891 |
|        | 42.4607795638552 |                  |                  |                  |
| ITGA3  | 301.904682664871 | 255.68068369366  | 542.467997217663 | 126.485649460666 |
|        | 132.341766267192 | 124.628895737993 | 164.847648206552 | 192.922622120507 |
|        | 476.421959423835 | 429.329962597147 | 391.528019827951 | 556.417356025042 |
| ITGA4  | 51.6558970571712 | 65.3694267397114 | 51.8122261766744 | 77.0774476767901 |
|        | 48.3814421939888 | 52.3187919317561 | 48.3411413510851 | 46.4672637826582 |
|        | 45.4799270968969 | 47.3791873993182 | 43.1931731665131 | 44.3521099857368 |

|          |                  |                  |                  |                  |
|----------|------------------|------------------|------------------|------------------|
| ITGA5    | 531.36214636517  | 125.90746674767  | 237.4882538723   | 659.126408705362 |
|          | 185.378190201718 | 1151.25293766167 | 78.3082773071531 | 213.590067519021 |
|          | 135.800775637089 | 603.224267841548 | 637.824136761292 | 560.802447943839 |
| ITGA6    | 43.9477262001082 | 53.6895401581575 | 53.9612654850046 | 43.26160898693   |
|          | 45.2556760873335 | 42.157627240486  | 42.3074504864935 | 45.8669209716694 |
|          | 45.9693232070002 | 54.5518174219283 | 51.592378351965  | 56.8056093987178 |
| ITGA7    | 48.8333989709933 | 46.29198852834   | 47.3861758958576 | 52.8502823653368 |
|          | 49.8304479381623 | 60.4065050472082 | 47.7390230243778 | 51.2623287419357 |
|          | 51.0062122023297 | 54.8979897528792 | 52.7817052791259 | 56.7711602236706 |
| ITGA8    | 41.4508241771315 | 45.7979032939211 | 42.8270038153139 | 41.6564075217517 |
|          | 51.5888395924843 | 51.702461863489  | 37.6036146841933 | 51.3472428383325 |
|          | 40.6957787921451 | 83.0700092537618 | 119.691133736693 | 59.4465684293847 |
| ITGA9    | 38.8561375693335 | 48.2220547806679 | 39.5450079747895 | 46.4555908533915 |
|          | 53.5594683028749 | 58.6439719071099 | 48.3411413510851 | 45.1714698794331 |
|          | 45.8325181856483 | 46.0119912782855 | 47.299647867533  | 47.6938628797168 |
| ITGAD    | 35.0202257459026 | 42.3550738181144 | 42.4580504587581 | 47.8164193292842 |
|          | 38.745552403895  | 36.3845892764084 | 41.0381860307445 | 38.079222289614  |
|          | 34.5633623842083 | 41.9666541498638 | 40.4504608195666 | 43.0930293831497 |
| ITGAE    | 202.325629133577 | 163.028918580618 | 156.294411442126 | 173.536155357688 |
|          | 115.597550918377 | 134.749803376372 | 211.964446599144 | 159.884578124679 |
|          | 145.363725698076 | 168.522052983892 | 216.004059887037 | 217.848539722853 |
| ITGAL    | 51.5888395924843 | 79.6516904169771 | 78.080034922779  | 184.898658656843 |
|          | 44.6834648302383 | 48.9826868640753 | 51.9421032049606 | 61.5824518349507 |
|          | 39.3750969348308 | 55.6865353018811 | 72.308304085263  | 43.7672102682067 |
| ITGAM    | 97.2535496140648 | 81.3696465421645 | 61.841867306916  | 554.551745559065 |
|          | 47.8075998240396 | 198.15553991394  | 101.898612603107 | 55.5578334877425 |
|          | 49.9951674107458 | 55.0016608333828 | 49.7363778831003 | 80.0919469092368 |
| ITGAV    | 450.008356194664 | 252.206029058968 | 276.699609951994 | 299.136348099827 |
|          | 229.188779190649 | 236.178265404264 | 95.5117928427637 | 177.379924616924 |
|          | 192.291576499908 | 210.50519205965  | 244.226756210656 | 349.767857026458 |
| ITGAX    | 90.407200101342  | 51.9819543312733 | 53.5698357689852 | 391.658764737446 |
|          | 47.4548471240051 | 50.4022543872993 | 64.5281945586501 | 58.2491793807176 |
|          | 45.2897806651929 | 41.5838486090904 | 41.8613406887824 | 39.7763627041882 |
| ITGB1    | 995.397944432196 | 626.749986744506 | 698.105755081829 | 640.944514118411 |
|          | 557.094756796515 | 836.472724085903 | 427.540236966999 | 472.522115719366 |
|          | 643.491217668415 | 597.191426276771 | 515.216890329893 | 835.171475474151 |
| ITGB1BP1 | 228.882072078733 | 124.280024888206 | 147.727354881531 |                  |
|          | 132.205423909251 | 195.790389809892 | 222.985386635178 | 231.893992191022 |
|          | 305.279475274196 | 154.752920877816 | 149.02612008344  | 147.010700944686 |
|          | 192.922622120507 |                  |                  |                  |
| ITGB1BP2 | 40.3478825593224 | 41.8848959280916 | 39.0775870687758 |                  |
|          | 40.5484717678957 | 40.2449343247539 | 48.7781962164988 | 43.8206425661746 |
|          | 44.0390019242862 | 44.8003345643334 | 45.9004543328976 | 46.7386599624801 |
|          | 50.3118072462443 |                  |                  |                  |
| ITGB1BP3 | 39.8662795144616 | 39.7835513496873 | 39.3709357615493 |                  |
|          | 42.5193208629123 | 40.0145811166794 | 41.2567470068038 | 44.9094465483072 |
|          | 39.512606833112  | 40.3316153483289 | 41.1222709786153 | 43.9450023643394 |
|          | 41.5961238651523 |                  |                  |                  |
| ITGB2    | 1263.76838179117 | 714.990611155096 | 586.735744054398 | 4036.89580181979 |
|          | 328.962069934895 | 757.833254346899 | 697.57030127315  | 427.363555286404 |
|          | 91.5370872909881 | 123.247207157645 | 132.518188482163 | 216.45007990575  |
| ITGB3    | 48.6621527194963 | 44.3529919625344 | 43.3085358214154 | 51.3851157261451 |
|          | 43.5544347011646 | 46.7800033479223 | 44.0687697278114 | 43.0390857698452 |
|          | 40.3316153483289 | 45.3530683538086 | 41.9908237694988 | 59.7999569757275 |

|         |                  |                  |                  |                  |
|---------|------------------|------------------|------------------|------------------|
| ITGB3BP | 60.1705241170421 | 91.3941563889513 | 47.646800205189  |                  |
|         | 55.0604256312495 | 78.1275793755619 | 52.5330333302271 | 75.164719839017  |
|         | 60.5571721986885 | 124.56803502087  | 64.6446465846487 | 49.6706535876636 |
|         | 88.0186381834147 |                  |                  |                  |
| ITGB4   | 86.7710020879725 | 214.073500272341 | 517.216393517181 | 67.9728793995736 |
|         | 158.769954040462 | 79.4916415027015 | 141.131275984303 | 143.215491185309 |
|         | 384.522115820048 | 247.843927763772 | 192.98559983091  | 260.766438659762 |
| ITGB4BP | 1122.44489338159 | 2689.80835574654 | 2133.78836857697 |                  |
|         | 815.810781070699 | 1549.93897368117 | 832.181997440212 | 2934.35616793443 |
|         | 1468.75291542154 | 2551.57660786358 | 1375.14388134842 | 1453.77801653969 |
|         | 1086.12171444149 |                  |                  |                  |
| ITGB5   | 670.271164195182 | 147.371811804618 | 154.355197155161 | 180.288784077653 |
|         | 237.237762964658 | 284.105466865264 | 183.336550845401 | 193.703214707909 |
|         | 215.290701336046 | 288.508774004052 | 252.583117397109 | 336.390195295291 |
| ITGB6   | 44.3355304829989 | 53.0383634135393 | 58.112348043634  | 42.8235313007746 |
|         | 43.3332476888305 | 40.650742261428  | 41.5817737564592 | 37.7612949798895 |
|         | 45.2897806651929 | 38.957687788868  | 42.7275315121163 | 48.3648494350286 |
| ITGB7   | 113.866742186841 | 198.103081445734 | 71.4473248804357 | 224.373975368936 |
|         | 53.6907197364586 | 50.8533737532786 | 64.4736987797413 | 152.17335005192  |
|         | 108.42710653018  | 101.954354107731 | 105.406282523992 | 66.295597720304  |
| ITGB8   | 47.8249696958403 | 42.3550738181144 | 34.3633615460307 | 45.7397504535169 |
|         | 41.467005949568  | 40.650742261428  | 41.706879587091  | 46.5717043290731 |
|         | 44.619512785899  | 45.0155543555707 | 41.2598458726002 | 44.2527566343661 |
| ITGBL1  | 41.9407041937973 | 41.3610369241157 | 44.2405728317107 |                  |
|         | 43.5627649099623 | 39.0564222526273 | 39.4953494583071 | 41.4742337714895 |
|         | 48.87875862356   | 43.7630587657205 | 47.7180816682562 | 47.0110068985119 |
|         | 43.7672102682067 |                  |                  |                  |
| ITIH1   | 43.9309845324767 | 28.5895665533366 | 37.5597671487621 | 40.4359177791566 |
|         | 34.4570158133896 | 38.5252456306656 | 35.6056062164318 | 33.5578650644246 |
|         | 41.2870505273664 | 40.8049408996274 | 43.6629145624937 | 39.3575468494941 |
| ITIH2   | 37.6397652536077 | 120.418406532204 | 40.4882741869718 | 32.1218888714537 |
|         | 36.6354013629791 | 38.3418933808844 | 40.7910160811527 | 35.5798430594271 |
|         | 38.5252456306656 | 34.4875013487777 | 40.0766543123257 | 36.064718696392  |
| ITIH3   | 32.9174234020987 | 35.0222940937513 | 33.281531405287  | 33.6816578730693 |
|         | 37.1565984182084 | 34.7983399096627 | 35.1307934330047 | 37.5511560880902 |
|         | 39.9444191873552 | 32.9981302187884 | 37.6484782516569 | 35.1451084093692 |
| ITIH4   | 40.7609952437622 | 50.3586212130973 | 41.0356368374708 | 41.7614975630362 |
|         | 40.6723334103791 | 43.9724628401189 | 39.6535880152834 | 49.7309743973184 |
|         | 40.6957787921451 | 71.2963721541702 | 58.133863696399  | 53.3059058105836 |
| ITIH5   | 2878.82618761804 | 1850.06063216244 | 2196.59044510709 | 2160.22713775462 |
|         | 1925.20977162704 | 1221.31634960736 | 2071.90741263566 | 2892.02001412369 |
|         | 1557.42399344934 | 2854.82112538867 | 2559.659041589   | 2243.24648907474 |
| ITIH5L  | 44.3355304829989 | 39.0102066700839 | 44.3344900481112 |                  |
|         | 40.0698728584484 | 44.7829632472754 | 39.3841861812262 | 34.6720534245631 |
|         | 45.7476095696859 | 42.1594905198929 | 39.5637454855233 | 37.5583886316038 |
|         | 39.9519547348106 |                  |                  |                  |
| ITK     | 71.6849360818041 | 96.6359641162026 | 132.985150338484 | 185.54813083393  |
|         | 55.1563703466328 | 56.4819802857598 | 55.695361644141  | 80.1144023887293 |
|         | 46.581796165231  | 54.2830238965339 | 74.7669841575348 | 52.2832912331043 |
| ITLN1   | 54.2648201582657 | 49.3581578587582 | 41.3366779545815 | 60.9379216295576 |
|         | 44.147557390293  | 67.8208976798364 | 277.796753761378 | 75.4935574755043 |
|         | 45.7452456977857 | 81.0880833950735 | 184.105396912056 | 59.987045425047  |

|          |                  |                  |                  |                  |
|----------|------------------|------------------|------------------|------------------|
| ITLN2    | 43.6706764143908 | 46.6314009405034 | 34.2890785915814 | 43.3078542962968 |
|          | 35.9058393060637 | 43.0860383229288 | 42.7431359850339 | 41.6466169548846 |
|          | 45.5779686360641 | 47.611018474151  | 45.4799270968969 | 37.4554876386402 |
| ITM2A    | 73.9986015964321 | 94.7008981904016 | 77.5718089378881 | 260.185079572615 |
|          | 46.572043843509  | 875.139073253298 | 70.6592421895338 | 110.746059249478 |
|          | 52.6561576154021 | 538.716947884528 | 347.003621791919 | 263.636675573982 |
| ITM2B    | 1052.91661429671 | 2721.97551918611 | 3124.84336032646 | 2122.39240932934 |
|          | 1055.69506483576 | 1991.4199819544  | 1855.0119962662  | 603.737787922337 |
|          | 2004.94135236716 | 1195.24078948059 | 1630.25992078321 | 1855.0119962662  |
| ITM2C    | 1335.4111951034  | 1921.48678333837 | 1009.47177197543 | 578.311131274653 |
|          | 1470.84169670955 | 563.927521628693 | 2323.81110653289 | 915.102542160713 |
|          | 2488.32876359853 | 1845.34855798442 | 1891.37245670852 | 1907.47560253019 |
| ITPA     | 166.821616593685 | 174.469283513638 | 163.995560004001 | 112.039388952208 |
|          | 233.326886009799 | 101.020328028769 | 193.897678586782 | 134.908982962131 |
|          | 101.46584765758  | 118.483499958227 | 102.750783393253 | 95.3145142003966 |
| ITPK1    | 148.925503526873 | 65.6010220593397 | 82.2766822827861 | 154.287396750021 |
|          | 79.1039287828151 | 128.414712393554 | 135.012695962236 | 63.4570909617664 |
|          | 102.559678338485 | 158.478919789334 | 185.109323245018 | 128.559660070271 |
| ITPKA    | 81.7117547901526 | 49.4067286971348 | 53.7792717770978 | 72.2577390063259 |
|          | 44.8897737954573 | 57.0775902639215 | 65.8986841086198 | 58.676230030835  |
|          | 63.3694113050568 | 48.3693338695392 | 53.4921736109774 | 50.2163892855092 |
| ITPKB    | 121.104663867264 | 107.513442725922 | 140.719373122712 | 129.592927998658 |
|          | 92.3034609409756 | 392.237227927376 | 94.8766888888828 | 115.328304312071 |
|          | 89.3342384381684 | 311.985010273921 | 281.906398109158 | 136.355036262681 |
| ITPKC    | 60.2547250212462 | 57.9509155144056 | 74.2769881586739 | 62.3936376596431 |
|          | 68.0414563597154 | 153.626578526803 | 69.1414574152997 | 90.2915974511786 |
|          | 100.476750028832 | 73.6240672213673 | 77.7714622826402 | 67.7662831916293 |
| ITPR1    | 89.7554896946341 | 75.8280474316969 | 72.5835488194631 | 328.721532812392 |
|          | 57.5685357492202 | 450.759762047652 | 121.945468001236 | 75.2101993995344 |
|          | 116.388069891158 | 169.18132209076  | 160.056757080676 | 241.706783147271 |
| ITPR2    | 53.3967242431461 | 51.0175677516029 | 50.9933795450314 | 96.7799695976296 |
|          | 50.0580547772867 | 56.2736599756843 | 59.5205055437765 | 48.0582855095143 |
|          | 63.955655956484  | 58.9836017745712 | 54.2999306485758 | 53.1182952086284 |
| ITPR3    | 1408.59798540643 | 1384.80615431656 | 805.590413262364 | 439.241483765416 |
|          | 752.837247653926 | 323.576613035353 | 1249.41227924272 | 500.241231327789 |
|          | 637.565156571985 | 484.968116511768 | 446.37035118289  | 615.227000137328 |
| ITPRIPL1 | 40.0270326792985 | 40.3021896270845 | 38.6727842796202 |                  |
|          | 42.8768096578102 | 41.5668884168669 | 40.3034574135048 | 40.7910160811527 |
|          | 40.047314525032  | 38.8271346375425 | 41.4606714407332 | 39.9899430628542 |
|          | 42.7303139017786 |                  |                  |                  |
| ITPRIPL2 | 211.421222959783 | 607.431621448599 | 750.151825182993 |                  |
|          | 385.439417884202 | 245.194730981772 | 283.111920665176 | 190.053043382767 |
|          | 261.326713935356 | 206.571946834892 | 250.993396750789 | 361.023743912857 |
|          | 399.66182195331  |                  |                  |                  |
| ITSN1    | 87.1183334887694 | 85.1950626054282 | 111.409762290528 | 91.2715671868725 |
|          | 90.775821431366  | 217.065944053174 | 113.198141130994 | 93.1668080716761 |
|          | 114.535461066963 | 136.736085245679 | 128.04037427867  | 133.040933717958 |
| ITSN2    | 40.8681871019812 | 44.5152708955623 | 38.6005272730664 | 40.7481155008596 |
|          | 36.2048942610546 | 39.6251842352088 | 40.6216891610774 | 39.9576138799997 |
|          | 41.7233690251839 | 40.6559419616644 | 38.1835938174625 | 42.934549734195  |
| IVD      | 139.999709303614 | 138.314834472957 | 145.250323683031 | 125.333208461509 |
|          | 338.000998124097 | 132.059215102854 | 130.506891299903 | 135.706144105357 |
|          | 124.064628168507 | 150.572774995368 | 206.41879845205  | 147.388500451427 |



|          |                  |                  |                  |                  |
|----------|------------------|------------------|------------------|------------------|
| IVL      | 38.957687788868  | 40.716553247236  | 41.0356368374708 | 35.49696651597   |
|          | 40.3452320167286 | 34.9849896310235 | 33.4316681623175 | 38.079222289614  |
|          | 44.8997235283254 | 42.5664883002833 | 46.8954576545929 | 42.4607795638552 |
| IVNS1ABP | 143.383133346874 | 124.738024302128 | 163.16724817696  |                  |
|          | 699.488969175268 | 117.165519915808 | 115.321592104747 | 197.703414428714 |
|          | 111.522812019895 | 141.594428857706 | 103.607345835114 | 103.826044798469 |
|          | 159.393207489822 |                  |                  |                  |
| IWS1     | 195.482216656634 | 173.236617176892 | 193.758357282411 | 156.69976952483  |
|          | 229.512022912803 | 193.395549316561 | 147.758917745955 | 201.977265056102 |
|          | 218.675464231277 | 149.173801572239 | 166.097017297742 | 244.109166881519 |
| IYD      | 39.5676051939342 | 39.7835513496873 | 40.931294690669  | 43.5627649099623 |
|          | 37.4470183315826 | 43.6670755115848 | 44.4639405506967 | 44.2159020605784 |
|          | 40.8970401536578 | 36.5806287103157 | 43.5710871617107 | 41.4508241771315 |
| IZUMO1   | 38.1169703906207 | 39.2907645923217 | 38.9790184198145 |                  |
|          | 46.1673159982664 | 38.2496050953547 | 41.554942319225  | 46.8613212048981 |
|          | 37.0390589468421 | 40.6957787921451 | 43.1839109702714 | 40.4504608195666 |
|          | 38.745552403895  |                  |                  |                  |
| JAG1     | 131.483899499125 | 183.002191434723 | 262.824698774297 | 183.918927595056 |
|          | 159.697488404476 | 157.568088397305 | 204.659954879641 | 116.967446594767 |
|          | 116.461730749198 | 378.12777235743  | 362.615047009897 | 264.924262411772 |
| JAG2     | 119.947688643528 | 116.094881058504 | 365.401746744015 | 92.3787087536027 |
|          | 139.905295316081 | 66.7585874672879 | 51.5119005564951 | 71.4564394972198 |
|          | 156.497017347274 | 147.782301091454 | 136.552025379187 | 97.5534379346899 |
| JAK1     | 163.62024333166  | 206.450109223116 | 255.365088438518 | 320.889609846069 |
|          | 140.853812988562 | 220.36831243882  | 134.796819654047 | 104.089998273812 |
|          | 186.522518256229 | 76.1382217104599 | 114.5696064637   | 219.805214090875 |
| JAK2     | 51.0225132036905 | 59.9682734755814 | 67.5417980425932 | 96.7799695976296 |
|          | 54.1225249245036 | 81.8426140611297 | 51.5967098638347 | 70.2541961995753 |
|          | 54.113533179847  | 65.813547096222  | 73.6362523983338 | 66.4626619269287 |
| JAK3     | 42.442231667357  | 40.4359177791566 | 46.6588655218735 | 40.0698728584484 |
|          | 39.4693871570028 | 40.1428591998404 | 36.5352572191451 | 32.4466419672036 |
|          | 38.9834959368496 | 36.0481934423077 | 40.2649309204478 | 40.0557788909923 |
| JAKMIP1  | 37.7384958256497 | 40.5400384479766 | 35.3649449469275 |                  |
|          | 38.5252456306656 | 36.6354013629791 | 38.2293008890613 | 34.806104801006  |
|          | 33.0038344711883 | 42.357910063876  | 33.2987269789328 | 33.8558232866797 |
|          | 39.5418280570561 |                  |                  |                  |
| JAKMIP2  | 46.0023068797812 | 42.3550738181144 | 44.2405728317107 |                  |
|          | 69.5544840164738 | 40.0599807618105 | 45.6129956328415 | 41.4742337714895 |
|          | 43.9366081640576 | 40.0403898620771 | 41.7405682794166 | 48.4717951775049 |
|          | 44.0451487108213 |                  |                  |                  |
| JAM2     | 77.4999637278723 | 66.3026572113793 | 72.5835488194631 | 119.670948133232 |
|          | 50.2163892855092 | 245.923368125413 | 40.4359177791566 | 62.1934012861178 |
|          | 46.1101825640108 | 149.719453306304 | 107.538934056558 | 147.471179343348 |
| JAM3     | 521.710190052245 | 177.29096218424  | 165.992057520727 | 253.605641311356 |
|          | 145.77302334589  | 1466.88103496067 | 71.3527183280827 | 239.96421556928  |
|          | 66.3209349903185 | 898.668526777346 | 795.381998233245 | 598.404003732481 |
| JARID1A  | 141.471672990444 | 134.258351436533 | 153.028210322286 |                  |
|          | 236.536058101486 | 123.768417863139 | 130.506891299903 | 216.45007990575  |
|          | 219.134220280612 | 206.899594905509 | 175.876518898179 | 169.75692324104  |
|          | 126.753713093485 |                  |                  |                  |
| JARID1B  | 713.685405035516 | 382.251727747377 | 758.462554576949 |                  |
|          | 232.944023917808 | 628.84789420227  | 213.799316520531 | 399.027079798213 |
|          | 470.004780385708 | 668.584452504579 | 552.162906190653 | 422.931891494195 |
|          | 413.067407579649 |                  |                  |                  |

JARID1C 54.3554233228353 60.2547250212462 48.8941062980393  
43.8002456102021 53.6907197364586 47.3791873993182 53.3111230705754  
61.5000955267432 70.178974380507 52.5522545249206 53.0798381965427  
56.7711602236706

JARID1D 73.8374823243007 206.103296228683 35.8265993915844  
158.862722884436 57.5685357492202 132.84476910529 125.891602778425  
143.215491185309 101.2825552085 177.55994726993 168.326515533208  
160.566474370004

JARID2 211.109957714241 138.738440901853 139.543015878846  
201.959257379662 308.568617575909 119.558756877523 196.844428284247  
526.146757036152 217.617227445082 124.017319373302 138.859992681388  
117.260454792593

JAZF1 68.3234331335073 52.1062000766427 52.3432130135266 83.2925226467532  
56.359578588344 140.921774805792 46.0228732507872 64.120219344545  
50.9010149857308 112.551747307723 89.8354888041611 100.188736523729

JDP2 38.957687788868 39.0102066700839 45.7968648044613 56.9299697426319  
41.1868052124344 51.1621379498014 39.2533668167483 58.0892402609917  
47.0804681460898 43.401782064778 42.170702295259 44.8372404608604

JMJD1A 77.4999637278723 66.8026147385682 57.2960245538881  
72.6824533717231 50.6470461863549 50.3245489035833 65.8986841086198  
50.857522488428 123.674164545425 93.2226507128199 68.7091708087448  
78.8968326770219

JMJD1B 120.837993273922 109.386655134289 124.397048303668  
99.2432911346944 73.0433648756396 121.120217132666 99.1769280484821  
88.715256326632 140.441315708048 150.829277770546 132.3192754634  
113.7763650775

JMJD1C 176.138603484209 101.759714275976 95.5530572805104  
195.108184885541 93.8630393470857 158.532307373857 106.582060920252  
109.374838860558 155.650716735976 109.795084617739 106.035435807364  
138.859992681388

JMJD2A 78.7450149191851 59.8102324370568 57.50915811428  
41.7614975630362 55.4919197421746 47.3791873993182 55.4004611309636  
55.1933004802607 68.4229528414965 72.5153335566211 73.5788549535062  
49.0655215909632

JMJD2B 41.8409927585705 38.6704566269103 41.3708420203838  
37.7469621225553 40.1978874031072 38.5252456306656 38.237657348649  
44.5029690493211 43.4656637536244 43.4544762830742 40.5824352835642  
35.8108713625055

JMJD2C 46.8141313516997 53.565717255469 49.8344973836834  
41.7614975630362 42.4864576619427 52.7156971154405 55.2088411137193  
53.5271601314404 51.5888395924843 49.8393069675192 54.5711704180349  
59.4465684293847

JMJD2D 38.385865183581 44.7829632472754 38.8775560911841  
42.2496337895968 41.1868052124344 35.7034203372528 37.1643693306382  
43.9366081640576 40.0403898620771 37.6383530120621 39.9899430628542  
37.2810767789306

JMJD3 49.085741080241 77.1737254584648 53.8724557170772 110.666686474986  
47.8075998240396 52.5330333302271 62.801431502597 77.2834482217973  
54.113533179847 54.8979897528792 47.4630625313159 47.8931773060789

JMJD4 54.7786516309154 78.5174639327946 70.4794854241035 55.4180794172794  
73.4535007027931 61.4944752562671 121.441763452598 90.1430468048409  
84.3526980051279 79.8511759086625 71.9658486648999 57.5372732453319

|       |                  |                  |                  |                  |
|-------|------------------|------------------|------------------|------------------|
| JMJD5 | 43.0001432913058 | 44.1239711172417 | 48.7039705048129 | 41.5464765641928 |
|       | 43.004943518025  | 43.5752393599169 | 43.5627649099623 | 48.6441988290952 |
|       | 44.5303781239209 | 47.8207974930031 | 46.824299585607  | 45.6692241948108 |
| JMJD6 | 53.4921736109774 | 53.9275079525238 | 51.9490810272761 | 83.764882413379  |
|       | 57.9161791762225 | 65.5226841723958 | 74.466989900636  | 54.2301964914419 |
|       | 53.6210959113222 | 56.4553747079294 | 59.9682734755814 | 61.3851695159988 |
| JMY   | 48.8333989709933 | 59.4908919662362 | 53.9612654850046 | 71.9062462001972 |
|       | 52.2089306840125 | 56.2736599756843 | 51.7714254834195 | 65.0656365694468 |
|       | 71.1894129030602 | 71.2409890549638 | 63.7963501146829 | 56.9379721393904 |
| JOSD1 | 101.103458852775 | 112.316483867372 | 88.6771566133367 | 243.015896514493 |
|       | 103.720371491639 | 107.148000219752 | 141.630277976624 | 145.972133104142 |
|       | 119.167027972122 | 108.788705797019 | 89.4747568145717 | 136.20629436945  |
| JOSD2 | 85.1950626054282 | 85.8945498067934 | 71.4473248804357 | 101.560929859785 |
|       | 99.8699868526053 | 120.392561825049 | 81.0331497830643 | 114.719721626067 |
|       | 106.165518810891 | 116.67447696188  | 125.786923817078 | 85.3431175579775 |
| JOSD3 | 41.8409927585705 | 46.4385386401326 | 42.4580504587581 | 48.856176220627  |
|       | 44.6834648302383 | 46.3715909653832 | 44.9863726205428 | 45.1714698794331 |
|       | 42.5406888281114 | 42.8936990772838 | 42.357910063876  | 51.0013344286851 |
| JPH1  | 48.6621527194963 | 47.2055133646385 | 78.7103847663605 | 45.5869891570251 |
|       | 67.0163226819964 | 61.1022920882065 | 72.4651758215622 | 61.5824518349507 |
|       | 108.098254669378 | 113.090530993447 | 87.129027106167  | 136.883475451494 |
| JPH2  | 49.4742925789913 | 43.4681646416585 | 44.0028192158386 | 40.3180310664156 |
|       | 47.973869237177  | 152.294357984689 | 44.9272279146193 | 47.3226997815962 |
|       | 43.4290452504928 | 89.7299583757595 | 88.4897895318663 | 104.704892803169 |
| JPH3  | 154.067791946816 | 45.4882438975269 | 46.2625470410195 | 47.3574589211166 |
|       | 63.3638417360105 | 59.9174456081704 | 48.1747307200218 | 48.0582855095143 |
|       | 45.0017158586743 | 44.571915452417  | 42.0750889188255 | 44.0451487108213 |
| JPH4  | 35.2267149016596 | 43.2649781354792 | 44.5134109184888 | 36.0481934423077 |
|       | 42.7107928951766 | 41.554942319225  | 45.1017494688414 | 36.2539950294089 |
|       | 35.9645119596869 | 49.5265949137207 | 43.0971787292711 | 45.0985088502363 |
| JRK   | 45.4507786740825 | 43.5873188565519 | 43.0016969050339 | 40.1804147506786 |
|       | 43.3896803974186 | 44.8872784170036 | 42.5660695551615 | 44.0390019242862 |
|       | 43.1180113655693 | 41.4659679379482 | 45.2685999173781 | 44.4067063477243 |
| JRKL  | 53.1309801459151 | 53.3094843669564 | 58.2251348002272 | 48.1662933382789 |
|       | 61.4366256816323 | 60.4065050472082 | 53.4921736109774 | 55.3122077514658 |
|       | 54.4912806027381 | 53.0357938671646 | 52.022479439889  | 58.2251348002272 |
| JSRP1 | 45.3872406432794 | 86.6411972262415 | 67.3469281984384 | 450.972039573066 |
|       | 70.6903168772326 | 47.9503724044453 | 102.77259665192  | 121.172652675767 |
|       | 62.9922928277769 | 45.3530683538086 | 44.2925355984056 | 41.0657892043496 |
| JTB   | 3010.38998829232 | 3869.93390477952 | 3343.07293372655 | 2513.15722262176 |
|       | 3653.59181300011 | 2248.64628069362 | 3465.3013599062  | 4093.70002166179 |
|       | 2611.32405374107 | 1683.24873205783 | 1480.95754707554 | 1676.22158135012 |
| JTV1  | 321.171736253617 | 345.529757315326 | 317.0659599072   | 300.703401968169 |
|       | 561.2769907009   | 310.120875196999 | 443.269396125834 | 344.887504955742 |
|       | 429.453114391562 | 199.294913752704 | 277.204818876581 | 277.12373983597  |
| JUB   | 36.9721666683086 | 45.2134010996333 | 42.7303139017786 | 40.9022255200169 |
|       | 44.4954892619459 | 41.1194494565538 | 40.7451277736087 | 37.7315666632629 |
|       | 42.992884918158  | 43.6701228397031 | 46.5650556481721 | 42.0424641526302 |
| JUN   | 1501.67042548971 | 2354.00192115549 | 1208.33498233518 | 832.181997440212 |
|       | 260.964562714558 | 3800.19142219719 | 2160.22713775462 | 1679.12630849964 |
|       | 752.837247653926 | 1601.52194699063 | 3166.48568397766 | 1357.41745370754 |
| JUNB  | 510.82619253142  | 2039.89728774097 | 1197.13566108661 | 1418.94307844471 |
|       | 625.435083064752 | 2663.19221471348 | 760.745188431719 | 799.803676957263 |
|       | 608.886783362316 | 1096.1705171588  | 1311.88650141004 | 460.04552567416  |

|         |                  |                  |                  |                  |
|---------|------------------|------------------|------------------|------------------|
| JUND    | 4717.02689540013 | 7075.82842238887 | 4216.69417265779 | 4277.93019582362 |
|         | 3562.96193568469 | 7393.77508374057 | 5354.58328030315 | 7562.42822724655 |
|         | 3490.63949257581 | 4986.44888767011 | 6819.74871209328 | 4717.02689540013 |
| JUP     | 479.696469083953 | 741.908952472992 | 853.947671456736 | 103.808640431626 |
|         | 901.793120584383 | 206.103296228683 | 995.397944432196 | 764.571579067138 |
|         | 1197.13566108661 | 964.268294825556 | 694.590958116425 | 328.176884082116 |
| KAAG1   | 40.2543341073001 | 38.0226905622357 | 38.6727842796202 | 46.614092935749  |
|         | 46.8674366115656 | 43.2805590023412 | 43.3262148375525 | 40.1474543172332 |
|         | 35.7973685350741 | 35.2880714952489 | 42.5426057453993 | 37.8490162439785 |
| KAL1    | 66.0303950772736 | 43.5873188565519 | 45.8844325913247 | 57.2856683017619 |
|         | 40.8873907150245 | 53.2046867327331 | 39.5496902678788 | 44.797320243931  |
|         | 39.1790517315259 | 44.2580151149956 | 38.3684202018524 | 42.2577689927563 |
| KALRN   | 40.7063426028871 | 42.3138951003676 | 39.3344387353654 | 42.1607322031054 |
|         | 38.8775560911841 | 43.2219358930127 | 42.442231667357  | 41.599960574499  |
|         | 39.1790517315259 | 44.8997235283254 | 40.9157352260901 | 38.6948848106802 |
| KANK1   | 78.1313732870053 | 246.568253751149 | 71.6050174762551 | 77.7973642829228 |
|         | 114.935101645207 | 279.448591201269 | 152.47776741936  | 119.545018066492 |
|         | 88.0877175295544 | 301.457545514208 | 241.31366702947  | 226.023657887826 |
| KANK2   | 147.498355916596 | 108.734392572981 | 134.271727318694 | 104.8505815954   |
|         | 92.7836745985234 | 728.023307553872 | 65.8986841086198 | 75.2101993995344 |
|         | 85.7111041637416 | 282.445037659981 | 315.276749671783 | 241.706783147271 |
| KARS    | 232.019748665806 | 248.194954741095 | 294.048088688381 | 228.933483421328 |
|         | 220.79051545138  | 242.135519563833 | 254.983975710833 | 271.529471399941 |
|         | 235.101442092497 | 153.812414753676 | 188.042978085327 | 196.760671234837 |
| KAT2A   | 333.566613571224 | 429.576301511638 | 583.421166842011 | 160.777879976503 |
|         | 1307.19925493293 | 235.33716196909  | 325.769076169162 | 353.076989769287 |
|         | 331.935072199058 | 697.837976820516 | 450.865888317246 | 457.502917254598 |
| KAT5    | 42.442231667357  | 51.3084273211359 | 52.2132783757422 | 47.6687908290818 |
|         | 45.3675390992851 | 53.3185097662527 | 52.2476631126873 | 48.9826868640753 |
|         | 51.1055541075029 | 52.7972156492746 | 59.1443775199516 | 53.655233033193  |
| KATNAL  | 175.125791527244 | 166.535245140901 | 176.27162536342  |                  |
|         | 137.176719695561 | 163.809567262808 | 208.30969642805  | 173.343091136741 |
|         | 147.557451530784 | 126.826715174564 | 144.17470770145  | 126.204310123186 |
|         | 149.24022100428  |                  |                  |                  |
| KATNAL1 | 50.0466349801009 | 39.2623423164488 | 46.3057385979341 |                  |
|         | 47.7462490950965 | 41.8806343997257 | 77.4578596822431 | 47.8179475230844 |
|         | 46.8339790776308 | 40.6533975461148 | 59.6565330440648 | 56.3884556031093 |
|         | 60.2989690950183 |                  |                  |                  |
| KATNAL2 | 38.957687788868  | 44.3187284857534 | 44.6511073781104 |                  |
|         | 38.1421709520616 | 47.3791873993182 | 46.852437033077  | 47.5130990528612 |
|         | 37.86982638952   | 50.5368663784059 | 47.7800121097582 | 47.481302504066  |
|         | 47.1060577218993 |                  |                  |                  |
| KATNB1  | 121.449647909665 | 162.628603963754 | 207.513604688444 |                  |
|         | 107.111886993156 | 124.791747507205 | 92.8131698915896 | 203.228211195516 |
|         | 87.6435494489518 | 137.916048669047 | 96.8240908274121 | 92.4619796591359 |
|         | 88.4819048592858 |                  |                  |                  |
| KAZALD1 | 54.7786516309154 | 54.0052948715814 | 37.8386378737561 |                  |
|         | 43.3078542962968 | 41.6806984441849 | 140.063595285844 | 39.0458123429605 |
|         | 41.4508241771315 | 46.6944238390932 | 80.3915591207869 | 66.5539062525344 |
|         | 43.6753843488695 |                  |                  |                  |
| KBTBD10 | 40.3478825593224 | 44.9370339275041 | 42.2837084302963 |                  |
|         | 45.7397504535169 | 38.2083710281545 | 156.008696165877 | 39.3585350448719 |
|         | 40.7311497914871 | 36.4816715148518 | 72.5918913856713 | 64.9401081242429 |
|         | 57.2008272301399 |                  |                  |                  |

KBTBD11 70.7238101239421 66.4300949831964 60.0856496605043  
218.056839407813 76.209239524646 120.123385036416 53.0277416531043  
101.681822254799 46.4164127487052 317.406465928295 214.562221385406  
169.18132209076

KBTBD2 291.086512261106 247.074756460224 211.019451518444  
302.20349084931 175.529493306927 224.412339736769 190.592556065939  
222.368324930003 264.071486075874 266.178061771978 262.215263489321  
275.882262550383

KBTBD3 46.441301934328 46.1797803908218 50.656598108034  
47.3574589211166 47.7508139534968 49.0361180089431 57.1070449050465  
43.3838505886856 50.4974478884077 56.8201201798712 52.7466456080101  
63.5896512396512

KBTBD4 56.7635847444447 69.2082505043031 79.2250098540901  
68.4906691348625 68.2585858486846 69.5080454202415 66.1940959364976  
57.7805922926828 77.6174893940285 70.4092514463186 62.1796792097014  
66.8703540124724

KBTBD5 31.197411437683 39.7835513496873 47.4740726032707  
36.6501141438378 37.956732373465 42.157627240486 40.6750540874299  
44.1311654985682 38.2215591930186 40.1179210534118 41.7272875295469  
38.4330755397458

KBTBD6 43.3638918705225 41.7614975630362 39.8299340037009  
38.8495095797881 41.4397539024976 47.4699236780425 40.968974769473  
39.4322247076926 44.1211971585961 41.7932258301997 42.8263096141654  
43.9282059368202

KBTBD7 49.540449125788 51.1541843174981 47.4740726032707  
52.5307002738469 44.6834648302383 47.0504142893738 51.3702158075274  
48.0283573444179 61.7559532093027 60.1466326805616 54.2625553617642  
61.340259048151

KBTBD8 53.8856501960117 52.683711208052 48.0191002461099  
130.673639258681 51.5888395924843 54.8265655909623 55.2088411137193  
66.6320017520888 56.0496524902806 66.3956936248447 84.1112814779578  
52.1918130336397

KBTBD9 39.512606833112 68.4278345554565 82.3344892042646  
44.7401523707775 51.0107745412152 51.294537308199 42.357910063876  
41.7877325563821 57.7865070833351 68.4659783447092 65.2295773603116  
73.4535007027931

KCMF1 50.8388984085636 55.5937992407324 52.4146320099098 48.3823941067574  
46.146585045771 60.8161720561234 52.6654109976514 45.1714698794331  
55.4698797365479 48.1392888470269 50.6109448604627 54.155542621974

KCNA1 40.096207471219 36.9398167613724 40.5734458834617 39.2780515621926  
41.3755760434934 41.4508241771315 39.0788811357542 40.931294690669  
41.074824727477 42.8936990772838 41.7272875295469 40.8681871019812

KCNA10 39.4710743516517 37.5469247328848 36.9795961564828  
41.1886975241176 39.1650142708257 40.5281496800812 38.1793598983615  
41.3506832276112 36.2733735494625 35.6208308220005 34.5633623842083  
40.4639532172338

KCNA2 40.6559419616644 36.89524015739 35.4484652445078 33.8111782249716  
38.1644569189523 44.8872784170036 36.9355798143571 36.8400213077707  
41.074824727477 40.2112371512838 37.9946685306274 36.1647506311964

KCNA3 40.2543341073001 43.3458769998118 37.5597671487621 39.6292788039793  
39.0564222526273 38.8336427948187 40.3302268293707 34.6977013306396  
34.0382693188794 43.9450023643394 37.2892641289258 39.1553169409075

KCNA4 39.3709357615493 39.5050383901884 39.3709357615493 44.265834798964  
39.859345745831 41.3553369544097 37.1643693306382 34.806104801006  
42.357910063876 45.4614234442527 42.170702295259 43.6753843488695  
KCNA5 38.0089018744739 51.119812302881 43.8495248991589 47.6687908290818  
36.9060997041453 95.5022104475922 32.8745892439217 40.7311497914871  
36.3649677956953 51.0055825931636 64.5722284870633 32.7043743065388  
KCNA6 36.8072833828297 40.9731067463382 37.7384958256497 41.1886975241176  
38.0598374201407 30.7058829591553 34.4570158133896 44.293922970134  
35.6970528713709 38.4187686307607 37.9230440150891 38.8495095797881  
KCNA7 34.1336988442837 37.8217989841918 40.4882741869718 37.9875302985336  
43.004943518025 43.0860383229288 38.5066108855005 41.0381860307445  
40.5912213523345 37.5343260962758 39.6403089864678 43.3744503319109  
KCNA1 39.0237504776589 43.8140132746242 40.6737160001291  
39.5522630869979 40.6251465440216 53.565717255469 41.1886975241176  
42.2577689927563 42.0621425894624 44.6367584399805 48.3847843498476  
42.297291190584  
KCNA2 37.8877750141557 44.9863726205428 43.3085358214154  
49.9014504704021 43.683792219729 40.650742261428 39.700936357233  
42.5435283762933 41.9097689475185 43.2438688757519 43.9802831041664  
37.8490162439785  
KCNA3 41.0608773166058 43.7644428186265 51.0539624358342  
48.856176220627 44.0451487108213 39.4953494583071 58.6431245059655  
42.7431359850339 47.798305839406 47.611018474151 46.7386599624801  
46.4499258373233  
KCNA1 38.0089018744739 38.7344853699576 38.3166554965434 52.8502823653368  
43.1252272136667 59.7009992986607 41.5817737564592 40.931294690669  
36.2733735494625 53.3059058105836 66.737740728688 49.0655215909632  
KCNA2 41.4508241771315 41.4508241771315 38.6727842796202 42.1273928203021  
43.004943518025 36.8059561571675 46.3057385979341 41.9315419791594  
35.9645119596869 37.6383530120621 43.9450023643394 40.5703581862752  
KCNA1 38.7537364570873 42.2577689927563 41.0356368374708 36.5393857306744  
40.3452320167286 35.4142595025086 44.7255207589606 41.1575777497576  
40.7847110517594 38.3092241935352 38.2795150354677 38.6454098044474  
KCNA2 42.6561897411324 40.6380495994768 38.2280071951674 41.5937402943136  
42.6022652963326 40.7616966228404 44.1350486752012 41.0381860307445  
39.1790517315259 44.9603714724456 42.4238335236362 41.0183489151839  
KCNA3 37.1485601150873 39.6995529770239 39.6451483836089 38.3166554965434  
40.5710637884029 37.3799542961839 41.1507980856436 45.1714698794331  
42.2577689927563 36.3612409063792 39.5399188536544 40.2669497398702  
KCNA4 39.0237504776589 38.5728560353959 42.3536549114165 39.7840818430159  
40.6380495994768 39.1664256481434 42.9214252283214 40.9784333688086  
41.3803269429468 42.1317134987795 37.7963032976457 39.9519547348106  
KCNA1 50.2203578628217 45.0905928998779 47.9035532886869 44.265834798964  
35.9058393060637 46.4648868771662 42.9803717121865 43.1567024035183  
48.2123120250343 41.0057887014368 45.2265319826548 44.9070250604284  
KCNA2 62.0553450433433 41.159706131351 45.4865173433646 43.1847628331565  
46.9906120932727 45.2852528185486 43.8206425661746 46.1673159982664  
48.0163377492228 45.3530683538086 38.3684202018524 41.7575097298927  
KCNA3 45.039075581593 44.6402215707065 45.7407938943718 42.2674195935107  
47.3172462673426 41.9946838598688 42.9176765336717 42.0778399888414  
41.863927676552 39.8411395375591 41.9083581529276 42.2577689927563  
KCNA1 38.1169703906207 35.6434124419782 34.3633615460307 38.4208429103799  
41.9842695818285 34.8956628705329 37.2892641289258 29.9617615620508  
35.5220586859301 37.3179578037963 39.153226699662 33.5578650644246

|        |                  |                  |                  |                  |
|--------|------------------|------------------|------------------|------------------|
| KCNE1L | 45.2875173643252 | 47.087835967892  | 32.6121532029976 |                  |
|        | 52.6947911480086 | 39.9697332660833 | 46.0364000143537 | 50.6774883370457 |
|        | 39.2672712041774 | 43.9450023643394 | 37.5343260962758 | 49.9338905397767 |
|        | 39.0536056496869 |                  |                  |                  |
| KCNE2  | 47.7267190613906 | 40.148780650831  | 39.7411455670172 | 47.8164193292842 |
|        | 42.1650127805175 | 37.4782441311626 | 42.357910063876  | 41.8417024632349 |
|        | 39.5806465938526 | 42.0621425894624 | 39.6403089864678 | 38.0452862258803 |
| KCNE3  | 39.5676051939342 | 41.9894412416874 | 39.9101908547397 | 39.3750969348308 |
|        | 36.2048942610546 | 41.9543948167375 | 43.6753843488695 | 40.7311497914871 |
|        | 43.8482802038826 | 46.1390887492649 | 42.6366765186182 | 36.064718696392  |
| KCNE4  | 51.0225132036905 | 41.8848959280916 | 40.4070046183108 | 39.6292788039793 |
|        | 48.6224651100733 | 66.2167164788023 | 37.0564573649223 | 40.1474543172332 |
|        | 39.9444191873552 | 41.4397539024976 | 41.8168470823451 | 44.3521099857368 |
| KCNF1  | 136.355036262681 | 34.7135536792489 | 47.0055981216687 | 34.2080003860523 |
|        | 61.7566103867825 | 41.7627910693483 | 97.5962784863854 | 114.230358276599 |
|        | 41.6616444147804 | 91.8251275769679 | 95.0604882262201 | 40.8681871019812 |
| KCNG1  | 55.9496022482843 | 53.7820518773759 | 50.1860191642359 | 44.604338271769  |
|        | 154.707548614663 | 62.4808812951288 | 315.960715273629 | 161.870972980732 |
|        | 66.2134832989335 | 59.2628513357357 | 53.7848321213704 | 51.3709954257843 |
| KCNG2  | 44.1737502492846 | 45.7317208802318 | 47.7052132264218 | 48.9155368657318 |
|        | 47.27543600687   | 47.6265906358519 | 57.3199610379543 | 50.857522488428  |
|        | 44.3440839686558 | 45.0864985243943 | 45.7792335738285 | 46.7591817286632 |
| KCNG3  | 38.4330755397458 | 42.466333667839  | 43.7085219318425 | 42.1622837416589 |
|        | 42.3685136297603 | 38.2293008890613 | 42.2577689927563 | 43.6434576713809 |
|        | 40.4997186069494 | 38.151911051187  | 40.0766543123257 | 37.7526485343328 |
| KCNG4  | 39.8662795144616 | 33.939263369489  | 32.1218888714537 | 36.2117792304273 |
|        | 38.745552403895  | 34.5592213228896 | 32.8745892439217 | 34.4590891021041 |
|        | 36.1457789072601 | 34.3674468322242 | 33.2774014136617 | 35.0222940937513 |
| KCNH1  | 39.4710743516517 | 38.0226905622357 | 41.6977706798234 | 47.481302504066  |
|        | 40.1151953732637 | 40.4753617660107 | 41.706879587091  | 36.2015763253919 |
|        | 38.5655198999985 | 41.3641352453779 | 40.1362682639916 | 39.0916553915607 |
| KCNH2  | 46.441301934328  | 41.9390340055841 | 40.7977328778231 | 45.505885458784  |
|        | 43.7858612339862 | 50.6360662655392 | 40.8546470680011 | 42.9845402973781 |
|        | 44.4672195495228 | 54.3554233228353 | 50.8248871185694 | 48.1627097465883 |
| KCNH3  | 46.8141313516997 | 44.9370339275041 | 40.4882741869718 | 47.2009420656854 |
|        | 42.4864576619427 | 46.3715909653832 | 48.0283573444179 | 41.3506832276112 |
|        | 41.1742244762318 | 44.4652605017595 | 49.0361180089431 | 38.6454098044474 |
| KCNH4  | 42.1537476443423 | 44.7829632472754 | 73.6323065529916 | 44.265834798964  |
|        | 47.0954207417646 | 42.750861693377  | 45.1017494688414 | 42.8482181313226 |
|        | 54.2825877218965 | 172.416351632442 | 93.1564463081702 | 56.8534370691413 |
| KCNH5  | 42.1679276329916 | 41.2214779019897 | 40.931294690669  | 43.0016969050339 |
|        | 37.8679241954337 | 40.1428591998404 | 38.977631784251  | 42.357910063876  |
|        | 45.0017158586743 | 36.4351122729314 | 41.6657053704762 | 40.8681871019812 |
| KCNH6  | 1359.9708539999  | 949.923102632043 | 860.265067346622 | 915.936211119242 |
|        | 694.590958116425 | 577.276184555955 | 1180.7204565402  | 1749.06320703181 |
|        | 714.990611155096 | 1004.28134410536 | 1698.18614771363 | 1094.91235708087 |
| KCNH7  | 36.3207931130288 | 34.8956628705329 | 38.6005272730664 | 39.6292788039793 |
|        | 37.1565984182084 | 39.132725377815  | 39.4069390012996 | 40.7752992161136 |
|        | 39.4512099697623 | 38.8507804383261 | 37.8766103688718 | 39.5806465938526 |
| KCNH8  | 48.3814421939888 | 48.9899488302637 | 44.1452943804044 | 49.1786207920603 |
|        | 47.4548471240051 | 42.6575535390785 | 50.8388984085636 | 46.0633179231318 |
|        | 42.992884918158  | 40.7063426028871 | 44.3763859390287 | 45.7562276914441 |
| KCNIP1 | 39.3709357615493 | 39.7453420559776 | 39.1799070031819 |                  |
|        | 37.4699641111076 | 41.1568680200968 | 45.3882138838137 | 40.0668875818227 |

43.2855454938964 41.2870505273664 41.8613406887824 35.195364621675  
37.1747156131306  
KCNIP2 35.9305494063137 40.2493681589104 38.0057289062111  
37.5764485234171 39.859345745831 37.1894304543751 40.6750540874299  
41.8417024632349 41.6340461942423 41.6373771565199 37.8372168909583  
38.0452862258803  
KCNIP3 48.9906383294199 49.7283221493206 54.4384603094793  
42.0102671859606 44.7829632472754 62.1334409150387 43.4544762830742  
46.9986083378817 46.4623302792651 51.909968572392 61.4467162706417  
52.2216613535546  
KCNIP4 39.5068753428772 38.7537364570873 38.198620622679  
40.3180310664156 38.745552403895 46.0867976914262 40.1613888954735  
39.4083414165222 38.5583217392131 39.8455060654531 42.04117016009  
41.2870505273664  
KCNJ1 41.0136069709699 40.5400384479766 43.1931731665131 40.3589492801501  
43.0669898157628 42.2857372794461 41.4742337714895 41.3094485574845  
39.5424643148065 41.800198520267 40.0766543123257 36.6176478999851  
KCNJ10 46.0023068797812 43.1805016690297 42.0621425894624  
50.5310598656998 38.4540849632254 45.7300501624017 41.706879587091  
42.5435283762933 41.2870505273664 40.5090849993014 42.7275315121163  
45.0985088502363  
KCNJ11 36.8072833828297 40.716553247236 44.7829632472754  
43.4410741327254 44.2607789091176 43.7630587657205 38.5066108855005  
43.9366081640576 45.5779686360641 36.2435874904689 41.2598458726002  
35.3525469364579  
KCNJ12 40.4639532172338 36.6968906669565 35.4484652445078  
43.3078542962968 36.08956004634 41.4508241771315 46.9929836306816  
34.2814697823693 36.9060997041453 36.2435874904689 42.170702295259  
38.4330755397458  
KCNJ13 54.3554233228353 42.6939394537076 40.1985790927248  
44.9370339275041 39.859345745831 39.2985791324641 42.4939802311136  
40.6171774724171 43.0930293831497 41.1222709786153 44.2142581488029  
40.9683275553869  
KCNJ14 49.0434455879335 42.8978721487095 43.8067278754098  
38.3166554965434 39.6535880152834 45.1296099011771 42.4939802311136  
46.852437033077 45.4799270968969 49.8393069675192 46.0095710163378  
43.423558862426  
KCNJ15 47.1277338930448 59.9968592852122 94.7980740999988  
102.268579941461 70.2354761751695 42.4058515827212 65.8986841086198  
121.172652675767 61.0429374109454 58.5530199658661 56.3884556031093  
80.6844261396045  
KCNJ16 53.2398469202731 46.3635803515159 47.9035532886869  
53.9517841438975 49.6507190068324 48.4758590019384 57.1070449050465  
46.2779564481158 54.155542621974 46.3810615657263 44.9081227425497  
45.7206695113999  
KCNJ2 77.9057333780847 58.174555206394 75.561262816077 200.401133392259  
73.4535007027931 65.3096524773304 44.0687697278114 49.9332280449549  
42.2577689927563 43.2988017098387 41.6336636285875 40.2669497398702  
KCNJ3 44.436995101921 38.1312950900467 39.5450079747895 39.9697332660833  
39.1650142708257 39.2985791324641 39.8695929627783 40.7311497914871  
42.357910063876 40.7063426028871 40.9157352260901 44.2527566343661  
KCNJ4 42.668311948721 39.7835513496873 39.4710743516517 39.0266821712099  
40.1846227436522 40.8125871172472 41.0829574574765 39.0102066700839  
39.7210115145672 41.3752447964111 38.7376588373126 40.2669497398702



KCNJ5 47.8249696958403 38.6704566269103 43.6039443285137 56.3471340054074  
44.7210190486327 51.2318935933116 47.0874209746031 43.0930293831497  
48.7358147030082 42.2614524730856 45.2265319826548 45.6233434183356  
KCNJ6 40.8681871019812 38.0226905622357 34.806104801006 45.7397504535169  
48.3814421939888 36.8059561571675 37.6036146841933 44.0390019242862  
42.992884918158 38.528621456378 45.390192977585 39.4490233720848  
KCNJ8 139.712472369259 64.3312319756553 48.7039705048129 91.1834104205004  
61.7566103867825 139.121494956408 51.3064929551674 62.9922928277769  
75.891637602914 96.2385885003071 82.5225075943931 89.3868257841517  
KCNJ9 39.5676051939342 39.7835513496873 37.6557714476853 41.6564075217517  
45.1137938810047 39.8455060654531 37.830876898596 44.2159020605784  
41.9635525160083 40.8970401536578 37.2018803984555 38.4330755397458  
KCNK1 113.866742186841 187.689343320587 129.352472514981 49.5424425850549  
77.5698542248061 54.5952754712007 78.7182388025668 82.1344514651393  
145.865118592916 63.9129423266349 58.0969258817391 76.2533853403813  
KCNK10 40.5235471987417 43.6608324511589 41.8441156763056  
39.4433784795209 40.9416717019827 40.9506062495231 42.1157692936428  
42.5003198766385 43.423558862426 44.6305275729869 42.357910063876  
41.7072675309997  
KCNK12 129.653830303132 90.7037473522607 40.1985790927248  
79.1000897258245 128.230543301378 47.2009420656854 86.2118355769367  
85.9474373829081 44.2607789091176 41.6373771565199 35.2339574411711  
44.2527566343661  
KCNK13 50.6473771879221 42.6022652963326 39.991353369336  
46.614092935749 38.4540849632254 36.9060997041453 33.8558232866797  
37.6557714476853 36.7267557061938 35.6208308220005 41.8168470823451  
38.2350720635382  
KCNK15 33.5994525227062 42.3550738181144 41.6977706798234  
36.3604951341921 42.269054475455 48.0350549043063 36.8369172900902  
39.3709357615493 39.0775870687758 34.5718473203083 48.8744644207821  
39.4490233720848  
KCNK16 44.7044140979108 43.8495248991589 41.1367478979484  
42.1273928203021 41.5668884168669 42.4580504587581 46.4388841354122  
43.3262148375525 44.3440839686558 45.9004543328976 36.131485826118  
41.2437378488025  
KCNK17 44.2350046179299 56.9312835667828 45.1569741609597  
38.9534635879195 61.4366256816323 43.4681646416585 42.357910063876  
46.1673159982664 39.6609238036815 49.6203214143464 79.2701322339022  
50.4847465816184  
KCNK18 44.0328992213727 41.4508241771315 41.0356368374708  
41.8778873678551 45.1137938810047 39.6251842352088 43.4544762830742  
46.7980335276155 36.8127605061228 47.2299678280724 42.6366765186182  
41.4508241771315  
KCNK2 41.8833988894167 38.2263227947189 40.3397581924196 43.632365631458  
40.2861860225841 45.1411314881341 36.2496364442264 39.5893773029164  
41.2457941494573 46.7203198047684 44.825830634601 43.0930293831497  
KCNK3 60.3381680822012 49.6203214143464 44.1452943804044 58.0218262176065  
53.3086645804786 64.5187138759372 57.1070449050465 79.7170181855209  
50.5785738734431 60.2877434874622 59.2106652388061 53.840976437122  
KCNK4 40.6559419616644 42.2900457798748 38.8356349277867 40.8084239472012  
40.4091351714709 40.7952353240579 42.6758568421347 42.3110002461296  
43.2163597439147 44.1758318057918 42.7775752471711 44.3927670230328

KCNK5 59.8248482438562 45.1694246393676 44.2405728317107 41.1886975241176  
51.3511088648386 45.2852528185486 47.8947595316832 51.3472428383325  
43.9450023643394 39.0648733099061 53.8856501960117 44.7401523707775  
KCNK6 212.302291274084 78.7103847663605 91.8533850418261 105.686346729469  
61.7009619624746 137.802147212644 88.3954618645976 129.550925624841  
72.3515874601288 88.7461361855771 102.304422999511 108.937199348319  
KCNK7 45.7700386532539 44.2105195734073 44.8872784170036 57.4595416719581  
43.004943518025 44.2607789091176 56.0515443021293 57.610757185978  
49.3780606970538 46.8954576545929 44.3440839686558 41.5132248356707  
KCNK9 41.1523487516364 40.148780650831 39.8299340037009 41.6564075217517  
36.9702228618069 40.650742261428 35.8227939208521 44.7044140979108  
37.7384958256497 41.0057887014368 42.357910063876 35.1451084093692  
KCNMA1 52.6960621424156 43.4396866157171 44.8872784170036  
68.534940191185 44.1070537445005 176.43047680293 44.0263754734997  
61.3536703073558 40.4997186069494 135.757061334489 111.501058276821  
116.17375251898  
KCNMB1 172.506486240017 154.067791946816 153.462055740758  
307.705431227338 116.22441634196 1604.80031304031 53.0277416531043  
126.360723656793 50.7619345314571 1060.64261592822 970.379875059112  
918.083610591772  
KCNMB2 42.1679276329916 42.1995942415177 42.640829914102  
40.1804147506786 40.5235471987417 45.6706505553383 40.4359177791566  
39.8965727231863 41.8245543174822 41.5804111566887 39.9899430628542  
41.176305927372  
KCNMB3 55.8810837854139 48.275452803061 42.8663534227844  
52.0470560622094 57.6234624694326 49.0497778708674 57.2758638871082  
65.963892742019 51.631710130416 54.9392038576957 46.824299585607  
50.2549436338147  
KCNMB4 64.7766649630041 59.7098454699348 43.3085358214154  
42.0102671859606 49.5666074434383 65.3096524773304 146.534713287435  
44.293922970134 84.7899210293383 53.9412154719864 43.3085358214154  
46.8129509799753  
KCNN1 39.0620487644635 34.9262464079777 42.8270038153139 43.5627649099623  
38.3561682218911 41.159706131351 39.6535880152834 41.6466169548846  
43.7630587657205 36.5806287103157 42.5426057453993 47.8931773060789  
KCNN2 50.8736372975089 43.7410507935043 48.3847843498476 42.357910063876  
43.7783560914188 50.2163892855092 50.0088611244948 40.831207953647  
43.8482802038826 52.3935328534772 50.3672856609022 48.3119523820103  
KCNN3 46.7704450730477 46.7980335276155 51.4308501933893 45.505885458784  
40.831207953647 74.9820339135242 44.8643898647322 44.5658219748173  
46.2027193115397 60.6266092582071 59.0850755856409 45.7979032939211  
KCNN4 57.50915811428 84.1224653052549 85.3718124658316 79.4528447794527  
70.4607501403122 55.1987351219665 139.177720567217 84.607833108004  
75.5681913475287 85.0218838801011 113.791456064084 61.6311118308635  
KCNQ1 46.4669243193596 50.7774722329703 50.7903824729818 46.1074305700679  
55.6069214673486 46.263826584899 52.9352788093583 47.834436078111  
53.9612654850046 49.3473947496935 48.2391540335232 52.2381815246326  
KCNQ1DN 33.3307770183871 39.1982470626863 36.8730514568925  
44.1483976313959 35.9894133432376 38.5252456306656 37.830876898596  
38.1835938174625 43.5669306063196 32.2463318211725 31.6063174764616  
41.2437378488025  
KCNQ2 58.9880711073443 41.7614975630362 43.6670755115848 41.3567204694281  
42.960000415838 43.1180113655693 43.4544762830742 42.3207901205146  
42.589641010388 44.1976966800856 42.8263096141654 40.6127321267617

KCNQ3 54.931538325692 50.7487159427973 46.1653991089885 44.550322123994  
41.6806984441849 47.0027453663546 41.4742337714895 57.2350830635912  
53.5677764726461 49.8393069675192 52.2229654768933 49.6629259325705  
KCNQ4 39.6392866043607 38.8653023707909 44.014441886238 43.632365631458  
39.2608760193011 38.1814775034697 38.1207627353276 37.1859370336728  
38.8514156961532 41.1222709786153 40.1742127891824 38.6067491721451  
KCNQ5 39.7576136507593 41.5132248356707 43.7630587657205 38.2599935139101  
39.6123051184545 38.5707420487455 39.2780515621926 36.1375121409002  
39.6413313949444 38.528621456378 42.6366765186182 41.3481355128089  
KCNRG 49.540449125788 52.153603364404 47.8263530599296 44.2166118829877  
45.0693869004277 37.5887129572848 41.6466169548846 43.2551508830106  
46.7414272831181 45.8471859855979 47.299647867533 42.2577689927563  
KCNS1 48.1125722136997 63.7721358300879 70.4794854241035 49.5424425850549  
72.9154861179393 44.2607789091176 50.0088611244948 110.09868737254  
52.4539007817929 121.557478857883 68.1513215633609 55.4635297192076  
KCNS2 40.7609952437622 45.0115870036541 42.157627240486 43.8002456102021  
46.1804647841331 40.9506062495231 42.9803717121865 42.9301944191913  
39.5806465938526 55.2214187655851 37.8372168909583 40.1700117452801  
KCNS3 219.582785177134 122.143519601825 116.374125502825 43.4877740913713  
71.7263663921367 65.1009848240098 147.187118389181 259.626847216881  
67.4775348162369 64.7269156363245 59.2903915056319 77.9028721785469  
KCNT1 73.2842501003097 38.0226905622357 36.5474283500601 38.6414316877471  
112.990752518897 47.2009420656854 39.5496902678788 141.376779431031  
37.10170285405 39.1621898366355 38.3684202018524 38.3291713594599  
KCNT2 42.3433931248155 37.8685585043426 39.3303857231606 39.2406797798509  
37.1565984182084 41.809704036355 39.0759686770589 39.3113207075992  
36.0123765382627 47.1785588364488 41.862634402486 48.2179100336632  
KCNV1 41.7397731376692 37.7384958256497 35.8265993915844 43.074472921841  
38.1644569189523 40.1428591998404 41.4742337714895 43.4544762830742  
39.0775870687758 39.6719190054379 39.6403089864678 43.2776458914333  
KCTD1 41.3785995857154 40.0527893189096 48.8623729374733 39.2780515621926  
47.1635381911975 41.6178506967511 43.8206425661746 41.6916508480321  
46.7414272831181 47.3010040326346 46.201352759435 48.9733758107788  
KCTD10 189.47090669378 111.333692153793 116.839274984089  
123.077231445204 238.338646661062 241.486113826383 88.8039637390786  
79.4916415027015 105.969617813287 306.294404016622 324.994911416877  
141.572530741416  
KCTD11 61.9504984796308 45.4882438975269 59.7483827511172  
44.265834798964 51.3511088648386 49.3172204533818 53.4921736109774  
47.8947595316832 62.5542376788358 52.0999467564713 64.0541263553251  
59.7999569757275  
KCTD12 78.7450149191851 82.8205269728224 87.9871827215149  
226.785831708938 58.8188963227059 214.100443708064 61.3620062177524  
66.1288889125299 45.3407340000202 70.0470864733496 74.6110659745477  
106.486195938039  
KCTD13 269.044011137638 129.299077627671 232.147792636393  
166.983092667334 312.795596385258 162.30238363798 115.861269747317  
437.542517888395 112.131738588405 176.861690566909 175.652989203497  
116.547937420457  
KCTD14 47.6397712007919 57.9509155144056 86.500678864429  
46.4555908533915 44.3557408297309 46.263826584899 117.138945281875  
37.86982638952 77.4186160113063 48.9826868640753 59.7269454048338  
103.302837652919

KCTD15 84.9075858560758 60.6080172588224 126.911056987607  
63.1604223919703 64.9072331703985 82.5956705829173 44.8643898647322  
78.0020909283414 80.0113001016496 63.7836577144372 66.0282565447846  
71.1595608255838

KCTD16 33.0463640202858 42.2577689927563 45.8844325913247  
39.7411455670172 43.6587492470348 41.2567470068038 39.6535880152834  
40.5158867964016 46.1101825640108 41.2276963324981 41.6336636285875  
34.806104801006

KCTD17 35.8208542506595 38.5252456306656 46.9040704638073  
43.6726153508978 46.3150221024046 48.0350549043063 48.1747307200218  
46.9986083378817 36.6312676076142 37.1275334308172 41.6336636285875  
38.3291713594599

KCTD18 55.0078788655089 69.8983723094667 71.5484567134601  
46.3203995372658 57.4163094213712 74.4508307047509 51.3064929551674  
60.7942162859036 72.5993974280876 57.0581769379589 61.940656536312  
63.6966761077037

KCTD19 44.7044140979108 38.7344853699576 44.1452943804044  
38.2041059863839 42.9090346219023 42.6575535390785 52.0942589368478  
44.293922970134 39.4762546236449 39.4710743516517 38.6662194645633  
41.0657892043496

KCTD2 68.1506072825075 56.3106156221316 59.499042267068 49.8274931621249  
54.9796412320083 75.9298650598599 58.3675164086197 53.3472907280113  
66.5539062525344 78.9420136903401 80.1809075683154 64.531467526747

KCTD20 262.327538467461 298.420882349382 295.856741468603  
486.757854744053 239.070294068861 433.194113859912 388.580556899321  
233.232472394727 171.689014874037 223.040734249612 273.807348011122  
277.796753761378

KCTD21 131.990661474974 114.41703170676 131.156876010639  
189.650905999631 134.981483569602 185.899535522689 105.382126899524  
119.86041265821 130.313381811168 148.358988653522 147.388500451427  
170.780021121783

KCTD3 201.427008153788 127.937436596431 169.001200403896 105.234356571498  
138.895316905243 245.356135592468 176.363810387584 227.843903680287  
193.758357282411 190.888188882162 215.131274710043 205.650076927315

KCTD4 42.7150227340364 37.920964499903 40.7620472083159 40.5484717678957  
32.9756367838345 36.4986986135769 40.6750540874299 38.6454098044474  
47.0804681460898 43.4885245598939 36.7283081422707 39.1553169409075

KCTD5 263.937966521917 214.980684661682 147.689479458785 128.485596739193  
275.314994786888 153.685754085722 312.015358620043 264.855020003755  
276.795797048951 148.781721594419 197.040881690021 151.975559850216

KCTD6 84.2104160850167 82.966263655525 89.0642206299985 80.6550905475507  
107.693162310852 131.045615546105 107.148000219752 92.6230008876347  
88.0055507173538 107.54932544455 99.4633962228768 105.63434679637

KCTD7 44.5282181324797 45.0905928998779 40.301483914446 50.7046706880325  
41.1868052124344 44.6524308640784 44.2166118829877 57.9713749600418  
46.3203995372658 52.5522545249206 51.0492389286271 47.9566297250148

KCTD8 36.5393857306744 41.7337506166619 38.8775560911841 40.9607305725196  
38.4540849632254 43.8582747295766 37.6036146841933 40.831207953647  
46.1101825640108 44.7958122466628 44.6286581923295 43.1805016690297

KCTD9 73.9986015964321 54.9392038576957 70.0955779023465 86.3663084195994  
55.1563703466328 124.628895737993 77.4046818339539 68.9522412475296  
62.1796792097014 171.877918435017 125.221639689345 95.614885914917

KDELC1 56.0477607422828 47.2770121962655 43.1931731665131  
48.665578118898 58.037539503209 59.0686629877982 45.4799270968969

41.4508241771315 48.9931786790166 37.920964499903 49.7363778831003  
 49.904979214379  
 KDELRC2 249.889110678139 148.198469375575 162.628603963754  
 156.150710793563 132.81898450496 316.745819100367 119.124583755587  
 183.182947690657 154.287396750021 202.983984966874 184.218705402964  
 150.396608064863  
 KDELRL1 1018.35211991691 460.162024551004 683.099079617304  
 392.622487173359 810.021622878441 385.675278463448 403.92758879201  
 564.929183025034 756.801598119483 532.35007819883 614.603743904512  
 486.622591654868  
 KDELRL2 588.247843264181 608.005012673672 485.139076884109  
 539.32996290794 965.530928317269 326.902009704746 506.75912743556  
 373.077564417927 519.563402444472 185.395460281034 205.672652429972  
 312.923326422701  
 KDELRL3 219.737294408079 69.6975740412402 53.7792717770978  
 129.070921534555 121.354667375673 92.2001835784782 117.369735504926  
 139.554519110944 71.1583251698218 57.5713378330876 52.6677145042939  
 65.9273663561152  
 KDR 43.6706764143908 49.4982025424177 43.401782064778 39.9697332660833  
 45.3675390992851 42.357910063876 39.1539892144371 45.0972184964705  
 46.0106098064475 48.0211752672327 44.553780984244 41.4508241771315  
 KEAP1 154.509548705054 170.287619901365 198.682422442825 128.885933852704  
 327.844083226326 182.37433006793 168.91210897306 130.002385558757  
 208.743876555152 162.782568037255 189.035121001539 149.5664106654  
 KEL 44.7044140979108 37.920964499903 39.2707964550441 46.8954576545929  
 37.5556299264699 39.8455060654531 40.3302268293707 39.3709357615493  
 52.5772854102326 45.7911932481722 40.6373400186325 44.6484005362281  
 KENAE 54.2648201582657 66.0479079234982 69.24946602508 56.7927450229377  
 56.5933259268408 44.3648993568405 69.3468840908665 50.628152951493  
 59.0563795877672 47.2299678280724 53.4921736109774 50.4847465816184  
 KERA 43.844855336215 39.4629815741023 44.1915202657512 41.6045220683604  
 40.9416717019827 44.1737502492846 39.7576136507593 39.1128725343972  
 38.6322728994674 37.1275334308172 40.1742127891824 46.8129509799753  
 KGFLP1 41.4508241771315 41.2598458726002 45.8844325913247  
 42.1622837416589 39.6123051184545 41.4508241771315 41.5464765641928  
 40.188873541274 36.6680209229535 38.6454098044474 40.8225507267584  
 48.5632819314123  
 KHDC1 42.1537476443423 36.89524015739 40.4882741869718 46.8954576545929  
 39.0564222526273 54.1440452292081 49.540449125788 40.047314525032  
 43.5669306063196 44.8997235283254 50.0808824383821 45.6692241948108  
 KHDRBS1 616.265771322835 1109.17675353971 866.712228831149  
 706.914069768466 1032.44965920118 1152.55315876935 1183.62228577053  
 970.379875059112 1144.34555072807 517.216393517181 711.08269990525  
 788.950470077369  
 KHDRBS2 36.4564050256915 40.2493681589104 39.5450079747895  
 42.5664883002833 36.9702228618069 35.2067831864574 37.9430145836712  
 38.8495095797881 37.7384958256497 36.4651112441576 44.4688999098904  
 40.5703581862752  
 KHDRBS3 444.618035487523 560.413725186282 62.4683876804812  
 109.726577835621 101.225705082674 189.769786121649 72.4651758215622  
 319.596352961751 48.1578509702472 126.670728021682 147.023857419777  
 158.718808397001

KHK 43.0545608384625 43.5873188565519 43.26160898693 46.4555908533915  
52.3660712483179 49.5888934105046 48.2748123114598 47.428201097025  
48.042366934301 46.824299585607 44.6892782664938 42.2577689927563  
KHSRP 207.710354513208 226.553946570328 249.308868215205 176.816741656659  
526.750242877914 130.953274536639 284.105466865264 267.107863045114  
343.677907141241 183.526640731647 166.608353896248 165.942795019496  
KIAA0020 426.933064567744 464.495132469257 238.819980744789  
278.140612054333 534.881442644054 444.169882251299 538.153124145211  
472.159979716705 337.627557996504 291.596692248591 345.529757315326  
388.132295362791  
KIAA0040 53.8856501960117 52.9603588177082 50.5089777244781  
59.6153684374766 44.147557390293 58.2531879680192 48.8319884367456  
53.2046867327331 46.2027193115397 53.7196173866021 62.8408273986904  
47.3172462673426  
KIAA0082 41.2424637338424 46.8954576545929 49.8344973836834  
42.6913548400127 41.8806343997257 50.7516773099639 41.3594868055879  
40.047314525032 47.7086093893038 48.2596564318071 51.4413099192899  
43.9541718254769  
KIAA0090 235.33716196909 187.238252376588 187.002948435359  
152.792457231813 242.932905246176 137.286091889421 159.571799428131  
295.430709655678 155.148913816397 193.15756263121 198.288493088076  
138.783011990219  
KIAA0100 50.6473771879221 51.0175677516029 46.3411353377615  
37.7469621225553 45.8051846088552 39.0266821712099 46.8613212048981  
37.33030683349 41.863927676552 36.0481934423077 43.6629145624937  
38.8495095797881  
KIAA0101 4406.55576617324 2712.36664370642 3313.98659031004  
3399.75820494572 2892.02001412369 2071.90741263566 3999.32180022337  
3838.19449971537 2921.68921750799 3690.00752647453 3490.63949257581  
3143.97163345458  
KIAA0125 40.6559419616644 53.4735821194294 49.9256753636167  
112.743602566917 45.2556760873335 42.9695585740813 39.3585350448719  
39.6474008369935 40.8970401536578 42.3606390470387 41.1638563416981  
43.3744503319109  
KIAA0133 57.934905173625 57.2871072823547 67.0421310720934  
71.9062462001972 96.6128615107975 57.8005007012205 74.2690269784394  
73.362936710475 71.5327770882433 62.3997407955361 60.3431719501866  
58.2251348002272  
KIAA0141 153.436974478757 113.929486370331 158.478919789334  
161.48562926756 116.099186392258 128.300809076274 93.5928272702304  
104.351256270039 126.826715174564 222.05036990665 227.535855856645  
155.378768637562  
KIAA0146 89.3989848564067 171.920449949522 127.265200736376  
73.3725472767369 104.80882886573 69.7677752398541 119.369994922092  
95.1037791424727 99.3797043236938 100.076931518374 112.753674408958  
127.345094323724  
KIAA0152 707.4124863603 383.578947165143 412.162238678684  
386.98657211459 371.393488010768 369.584648534533 418.01691355558  
427.818758455214 384.280434953152 601.611039798626 542.467997217663  
534.629009719855  
KIAA0174 788.950470077369 764.571579067138 911.661341702443  
657.310970474676 571.790034754076 524.972936438175 687.862452802453  
1228.1735887278 762.855719373733 1102.03940742413 938.151864971251  
808.857027942253

KIAA0182 347.074754731148 108.991044950132 233.07404514708  
141.577762652792 108.815245119101 138.581471125405 53.0277416531043  
161.422918681934 119.82102280033 220.454785391748 180.15711251649  
149.352994264999

KIAA0194 282.840679491909 113.491158368594 165.440751113862  
207.741669973713 204.944787289897 142.846665249354 136.883475451494  
243.549194928524 178.961579489906 190.592556065939 200.591114641608  
209.038077542654

KIAA0195 244.498602338731 268.265540230814 181.516519907011  
120.284321694275 106.276392548097 100.650129064849 183.702709922933  
159.884578124679 171.135041358339 174.469283513638 143.973063517706  
114.142157259903

KIAA0196 343.016541928592 382.808520776835 284.575587310164  
308.728126648231 548.815225941887 313.594031411352 231.685652845234  
134.307645598718 270.44099301072 173.308366696429 184.964039515715  
242.135519563833

KIAA0226 44.7915315085948 45.4143854024453 47.5673419710251  
44.9370339275041 43.3332476888305 46.4648868771662 47.4439407315335  
48.4670130605028 48.8067321016961 43.401782064778 44.7926323492519  
41.3481355128089

KIAA0232 48.5835484742456 67.0402749076279 55.3122077514658  
54.6089451252049 52.8190882379316 58.6439719071099 60.0981687048269  
46.0633179231318 61.0094935318105 66.0786923699684 69.7855392178808  
53.2046867327331

KIAA0240 318.527516338791 182.219366179899 202.627009037401  
222.16475904496 112.830467116678 213.140641182603 164.580141651883  
131.808634405319 183.526640731647 385.594118191769 303.281551940647  
228.384073242481

KIAA0241 100.663054866186 59.4908919662362 68.7091708087448  
75.6103053700122 94.1575209300592 46.3715909653832 66.8475050031365  
90.9010016862442 104.900627862215 69.7729022157455 66.6788758487969  
58.112348043634

KIAA0247 192.632227878708 118.439721088864 129.938114164087  
511.067537752967 105.589475270494 168.78407943637 78.8250642061439  
120.142759111608 79.5488891958168 143.053774297331 137.955007835039  
141.572530741416

KIAA0251 56.0477607422828 70.4607501403122 77.7615826856723  
49.4786466722535 67.4534389579576 56.0477607422828 54.8074655158941  
51.3872161199373 58.865217170468 41.9219580093938 44.9713479185144  
51.2318935933116

KIAA0256 213.799316520531 157.040132256772 131.045615546105  
190.854807132673 107.294098632695 241.08817915181 164.234067632827  
191.6998930948 138.81810375553 240.975885654236 233.263058459431  
244.707381127491

KIAA0258 38.2083710281545 43.4396866157171 40.931294690669  
39.7411455670172 38.745552403895 43.4681646416585 42.1607322031054  
40.6171774724171 37.2810767789306 38.3092241935352 37.1059647239814  
38.1421709520616

KIAA0261 87.1735705257803 113.102823481296 99.5531381996521  
89.9284109077375 92.9747592911324 116.900364583878 82.2650787041549  
75.0377156190383 90.2227706363325 66.274247400793 89.0684909049451  
95.7383730980717

KIAA0284 53.1309801459151 47.1332119496722 48.3847843498476  
42.1273928203021 51.5888395924843 44.8872784170036 54.6414321010929

55.6904617926772 49.0986627051784 46.7646877499666 49.319499137678  
49.5539622682049  
KIAA0317 41.2424637338424 43.2649781354792 40.4882741869718  
49.9014504704021 36.6354013629791 41.7627910693483 44.6032218589199  
42.4580504587581 35.2143190355414 47.0055981216687 43.5710871617107  
44.5432192783161  
KIAA0319 38.1169703906207 40.2493681589104 40.301483914446  
41.8778873678551 40.6723334103791 36.2768299545794 47.1345949868029  
37.5511560880902 38.2215591930186 35.195364621675 43.5710871617107  
39.5418280570561  
KIAA0319L 65.5495324730507 88.2568398791731 97.9806802695685  
70.6138659908885 83.6000059297772 59.7629007954215 76.0709828871754  
78.59966540743 76.8864157610323 73.4899394858239 74.5065528806984  
71.9369353731849  
KIAA0323 168.288592321667 165.336029381509 115.256208610595  
99.2432911346944 96.6128615107975 111.532958750074 83.2162112994735  
88.5511408870489 77.5480089703916 118.854313907627 101.28981910937  
140.226992517573  
KIAA0329 39.9697332660833 44.5884811528117 42.4580504587581  
55.4180794172794 43.844855336215 45.6129956328415 37.0564573649223  
40.1474543172332 47.4699236780425 47.4767851750188 44.1148826235374  
48.27609330316  
KIAA0355 363.002913525646 305.684635013927 502.205366225368  
366.615979176657 260.185079572615 292.433066791716 359.940393399742  
320.504100222566 379.473739290565 357.668448180268 326.250872625748  
328.721532812392  
KIAA0363 63.7818442618767 45.7576020206129 45.7968648044613  
49.3654837541353 53.2090401010575 112.721024337362 46.4944619663072  
47.7508139534968 62.7977686460693 91.5230424957075 74.3766944386886  
76.3334723210842  
KIAA0367 76.4637616585578 50.0425298550559 44.7829632472754  
94.3229189690855 42.7982502551634 846.773659307087 44.2166118829877  
68.9522412475296 39.3750969348308 567.534792333871 525.687522832693  
556.092573451208  
KIAA0368 133.314819245044 122.143519601825 93.5717680539357  
132.205423909251 87.7844808613265 179.767874494671 100.289042948128  
120.001312008518 135.843624468413 139.218017862207 161.133104660281  
140.853812988562  
KIAA0391 96.6833301748676 234.078434290473 202.060761076547  
150.801729138762 135.737771384104 121.744701580607 139.177720567217  
178.496935603128 157.334378544568 165.311139930529 161.890859629246  
174.332103484796  
KIAA0406 79.8844295847317 73.3950348855139 73.3448790478335  
60.3481762331447 91.7629175712824 64.3383155834968 118.483499958227  
80.3860547572521 73.7873098190297 70.9702772728923 68.7091708087448  
70.3309641302984  
KIAA0408 65.4561038762234 51.3084273211359 60.9621846036092  
60.4646208319121 61.7566103867825 57.8944021095265 65.524821699432  
101.272774711455 59.6700171760426 91.2715671868725 89.2185019250322  
83.0460206754856  
KIAA0409 67.6011992144113 81.7367617812869 72.2797007105795  
63.6334154351075 96.332996264667 118.302679462326 62.801431502597  
78.8250642061439 80.0733119200914 95.5156363110528 108.512469038407  
99.7529382840954



KIAA0415 78.0020909283414 61.3838877877366 61.5824518349507  
87.2643859655159 62.9553576299033 55.3202238943712 62.3556396662215  
63.9110569727542 54.7966692984192 61.8529316708431 58.2941346100716  
46.917149434588

KIAA0427 142.492693744683 107.585504340548 107.034189847828  
102.177189421378 76.5375674421131 223.219262492785 91.5258329186709  
98.2074490157865 79.9391673512018 220.597255695837 199.776860110557  
213.073369426342

KIAA0430 485.310097523194 492.902027204364 651.969296681551  
468.477585169219 324.994911416877 689.228901128857 316.745819100367  
474.729653426958 414.293172794592 726.42773300581 745.219025960188  
777.854349637516

KIAA0460 76.2368668439875 65.2001674269291 69.4967762263181  
65.8926843080114 85.2849531543957 84.5913809068614 89.9284109077375  
133.930007857002 86.7730065232892 141.567299023381 129.299077627671  
88.5638310461364

KIAA0467 39.0620487644635 43.5873188565519 43.0016969050339  
39.9697332660833 45.4751076037511 37.2686490268265 42.629412460409  
40.2382908228517 43.9450023643394 41.4397539024976 39.7342718293432  
36.6603338274678

KIAA0492 95.3300728806601 57.8405769800773 57.2960245538881  
59.8102324370568 42.1650127805175 47.7556758818053 57.4047331041592  
87.2437977005922 62.9922928277769 74.1228645930185 65.7587943905649  
57.6860752168769

KIAA0494 376.141477833569 442.080188140864 537.997378276053  
301.525915314179 276.360065404067 372.421330252979 302.667538432677  
431.727858902449 562.798580332885 657.59007878546 622.964590694346  
502.205366225368

KIAA0495 56.1912096308988 47.3536182445315 34.6977013306396  
60.1837189855762 53.5594683028749 58.5530199658661 44.6032218589199  
57.9713749600418 32.9756367838345 57.3562426592112 56.4873776344986  
59.6757573886627

KIAA0513 90.8236750745974 56.6146179789815 77.5718089378881  
160.360785581153 57.0504111569238 130.336599857526 46.1634822993009  
58.0892402609917 49.9162522057712 120.837993273922 104.873452487222  
91.3112603277315

KIAA0514 52.7367271988171 42.2577689927563 61.7502624458447  
41.8778873678551 47.8697093824642 45.3328270847467 88.8772406115484  
88.1331756561668 69.779139490544 48.3693338695392 51.4995997550889  
48.1125722136997

KIAA0527 39.3100256336821 39.6493706695391 40.0998167098057  
44.265834798964 45.3675390992851 43.0144844590744 39.7162631015511  
42.3110002461296 39.853866204927 43.8710182120571 39.8184668132023  
41.8200132437731

KIAA0528 187.580695643466 195.765247956108 183.746651924774  
256.258779434769 128.749209040345 203.353724675525 210.485586903711  
236.340873296213 324.658458599373 317.835330028579 300.186402341399  
218.917221711155

KIAA0556 133.453860783605 155.942366087388 192.264432082651  
95.3070802596041 142.863673914134 106.486195938039 105.247736284747  
181.586195566181 92.4350913779886 97.9675668521083 103.316970096472  
91.531459931855

KIAA0562 201.800572658224 128.402988047056 124.397048303668  
120.068630086702 156.976072444343 118.302679462326 164.580141651883

235.315897087189 137.10896135739 187.21383075601 154.93193897888  
123.978615472736  
KIAA0564 57.4376528157926 86.1303605978972 80.7894026811963  
55.3141112947345 84.7058085717914 56.8875898013449 76.1162400934059  
57.2856683017619 77.034044544055 77.8620267163666 78.1132840562953  
93.7444359334292  
KIAA0565 43.0462952354436 41.4123755032424 45.7486514056858  
41.948762493127 43.0723817756832 42.4580504587581 43.3262148375525  
43.0390857698452 45.1899271235974 42.4247468951743 44.825830634601  
42.8256152216734  
KIAA0586 67.9531693869426 75.41408189458 82.6983700200815  
53.3967242431461 67.0163226819964 69.7677752398541 49.540449125788  
67.5206810636627 60.3977304934451 76.011923854897 72.6162848018047  
73.6512983066046  
KIAA0644 141.852330109472 49.2050538150106 52.7005092555102  
54.6089451252049 57.4163094213712 64.3383155834968 46.3057385979341  
48.6441988290952 48.6494451061637 73.8313212063649 49.0361180089431  
42.6758568421347  
KIAA0649 91.8733417805775 106.309161354804 61.841867306916  
59.2778887402357 77.6174893940285 69.0530953932111 123.247207157645  
75.3462586192013 68.0796261751272 76.826527950236 81.7500436717038  
67.5047089908724  
KIAA0652 47.8249696958403 48.3699741879723 47.3861758958576  
43.8002456102021 43.9450023643394 42.8598805316863 42.9803717121865  
45.0972184964705 56.2441895183416 48.6124127998952 48.2910530887214  
49.8253396161069  
KIAA0664 241.175454742029 328.387270297393 323.705254926762  
100.774098314706 348.862367731887 144.290966198687 615.011590811277  
379.473739290565 292.389429869034 347.196922795214 399.733432664718  
207.928770428477  
KIAA0672 135.567012693522 73.9376772899278 67.8010199320754  
66.7750249658122 56.5933259268408 104.914715637173 112.805898501551  
148.403272698474 113.873117749074 132.604567913122 125.891602778425  
95.491982090349  
KIAA0692 43.309444338099 40.7952353240579 41.2793038361528  
40.6897401973581 40.3124262005404 39.2623423164488 38.8742176213726  
38.1281002984366 41.433180957815 38.4970433581463 39.9070785037411  
39.085216569009  
KIAA0738 41.0608773166058 44.7829632472754 42.4580504587581  
41.5464765641928 37.7576900881741 45.1873487463472 41.4742337714895  
36.43924066428 38.9006788676407 43.6033221838149 42.911855821602  
43.1805016690297  
KIAA0746 101.211796615204 455.223217772744 501.234159111283  
390.906200053021 91.9685593100867 81.0880833950735 192.171116215791  
131.483899499125 343.677907141241 616.912306849151 551.915864019927  
615.227000137328  
KIAA0748 41.7397731376692 48.0296332183129 46.1653991089885  
41.5464765641928 46.1804647841331 50.6360662655392 39.7576136507593  
39.2672712041774 40.6957787921451 38.1042454705119 39.8184668132023  
40.2669497398702  
KIAA0753 81.537796828766 63.4570909617664 62.4683876804812  
51.7739270955254 57.4163094213712 61.6219790276408 69.9214859673839  
65.1637149462661 57.8772482723463 78.7543199947688 73.0247140074919  
70.9377012403023

KIAA0754 41.1523487516364 40.7952353240579 43.3085358214154  
38.5252456306656 38.8456942580061 44.4619248757502 40.0052661202207  
40.931294690669 42.1594905198929 40.3235655331796 40.6373400186325  
37.6557714476853  
KIAA0773 45.4507786740825 43.8845577235486 43.6670755115848  
40.0322420615846 47.5002668436865 42.7107928951766 42.8036731479932  
41.2551966132486 44.5678064264717 46.1390887492649 42.5426057453993  
43.4709415392696  
KIAA0774 39.1590964332473 44.4612332327353 45.0958954736034  
38.7864161493321 44.4954892619459 41.3012916486748 43.2776458914333  
41.5817737564592 44.1070537445005 39.9559575274857 45.8180710486329  
44.5973052166071  
KIAA0776 42.0532901689036 55.4635297192076 69.5937318502259  
55.6481366056639 51.1368583672022 54.3478800757394 46.7100796279384  
41.7419877611072 44.1519466943185 43.7303813515864 45.310660704531  
46.1592873342534  
KIAA0802 49.3463416794995 65.2464683900404 66.603126065489  
55.8709511400674 58.5450868286167 49.7458652239071 57.4047331041592  
49.5185112777773 65.9254098858352 60.7495043977707 56.233217375698  
61.0025829061063  
KIAA0831 117.76002524375 98.5746416750459 90.4765857081732  
74.2429851177794 63.955655956484 111.009050621499 61.2183034191703  
115.577618925646 95.3507664364654 154.149426842591 106.443777149496  
87.2175634803271  
KIAA0853 36.6480005877129 35.3307157989724 36.0306975524309  
38.3166554965434 43.1252272136667 40.650742261428 36.08956004634  
45.3872406432794 39.5806465938526 38.2069499294002 40.2649309204478  
39.8497227447888  
KIAA0859 407.564154455615 182.685579297058 268.097966292089  
199.181938253995 573.832332097619 176.520449609867 362.196116025799  
235.682605856428 187.862483922786 215.399634344016 201.875082892488  
165.797721197832  
KIAA0888 43.3638918705225 42.3550738181144 40.1985790927248  
40.4359177791566 39.6123051184545 42.357910063876 45.6706505553383  
42.0847226073592 42.0621425894624 44.8997235283254 39.1878770155069  
40.7704587752083  
KIAA0889 51.413025495745 56.8373628733077 50.9010149857308  
48.665578118898 57.5040500497076 53.8461734834857 57.1070449050465  
54.720204938924 53.9287524861617 49.7259371799014 52.104880481326  
49.0655215909632  
KIAA0892 116.426770366736 181.420545696696 155.099281008688  
102.706563820232 199.54796711653 119.015431849218 103.75895351937  
71.6202385170491 99.6946103680372 131.645714321903 100.937651342589  
107.693162310852  
KIAA0895 39.4710743516517 40.6380495994768 32.5052327840481  
36.0481934423077 45.2556760873335 55.3202238943712 59.5205055437765  
52.3068458655445 78.7182388025668 43.0919221375514 40.4504608195666  
47.6040671292013  
KIAA0907 239.229093340475 210.38953368311 265.520773157991  
151.740176274202 373.077564417927 159.554916039519 159.571799428131  
183.77850568836 193.380035526465 336.795797976236 279.841798764418  
290.371909722404  
KIAA0913 577.276184555955 423.804472820231 425.60854194674  
508.581400606496 227.817928402227 359.889643461047 309.022069786139

285.626835802986 727.181489302632 545.827286197333 518.074074000609  
326.357036514613  
KIAA0922 72.0334593545916 63.9179552265502 75.9174504780598  
122.548989126048 76.5375674421131 91.2681347227088 67.5206810636627  
91.9919654450652 67.3230935444252 66.0786923699684 60.9446532180211  
58.4200819624972  
KIAA0947 48.1460386356622 48.4497719907777 48.8670821164567  
53.9517841438975 47.2740099216972 51.4931742685391 57.2008272301399  
53.2695955993896 60.7605365979891 54.2830238965339 54.1963147679251  
52.2832912331043  
KIAA0953 39.8662795144616 42.0709558258414 43.5710871617107  
43.8002456102021 47.8075998240396 39.132725377815 52.0942589368478  
46.8954576545929 46.581796165231 46.0119912782855 41.3553369544097  
45.4799270968969  
KIAA0999 67.0577715520007 102.655050997714 91.0443726041992  
167.626012561905 77.9085946827079 177.515053183327 118.27400376579  
108.213380368446 105.328975917946 144.17470770145 161.326580647514  
134.633769604568  
KIAA1009 59.046385957117 62.5528124447176 73.4962349716902  
57.8277957325085 48.1473938886239 77.9085946827079 64.0985088513857  
54.9919060580109 58.174555206394 68.1674425673171 65.5386366902998  
67.0782129304647  
KIAA1012 125.465429498178 211.625447303889 188.386331007465  
262.215263489321 110.214922820817 184.50283792606 173.694418385132  
206.481424743576 236.10027586633 162.467159261789 197.13726107504  
187.331614826395  
KIAA1024 55.9249770393176 47.4740726032707 42.9104454767916  
47.481302504066 41.3755760434934 36.6271061451613 40.1235656101329  
52.3068458655445 39.6609238036815 47.4767851750188 47.7535797917441  
40.0557788909923  
KIAA1026 56.3047629466121 53.0798381965427 56.9733113918431  
47.0874209746031 62.5106969730855 54.2886483704949 59.4346711476105  
78.6100656626189 51.9950964009224 49.1263312877155 58.4816190076338  
50.8056327587768  
KIAA1033 39.6609238036815 36.4002279956519 33.553634633839  
31.7207795618545 32.5318884330468 36.1190722948669 33.4316681623175  
33.0038344711883 37.5469247328848 45.1569741609597 32.2133093774284  
36.449101775775  
KIAA1086 46.6348258763289 41.6466169548846 40.931294690669  
42.357910063876 41.8806343997257 40.3357777530419 45.1017494688414  
47.3791873993182 39.2809305246091 40.6022003765153 41.6336636285875  
39.9519547348106  
KIAA1107 52.9240098541574 50.2696827764943 49.2041300973417  
45.1944222548351 42.6022652963326 46.7800033479223 60.6548851977964  
52.9813204449021 54.8946088631931 70.8749669449099 57.2979215534929  
59.7999569757275  
KIAA1109 42.6036491382658 44.7829632472754 43.1931731665131  
44.0451487108213 46.0043807840705 45.6129956328415 43.1931731665131  
49.2019743609873 40.2274522635576 44.4652605017595 46.3370338074996  
44.4475838947656  
KIAA1128 103.302837652919 90.0420794458477 105.914573205761  
119.72858253254 71.9737561190706 233.90802199627 71.7546556028831  
83.2240772671045 89.140025661759 123.536432289877 141.370796803908  
178.400810392873

KIAA1143 48.9906383294199 50.8114699212931 53.5139000636716  
54.4586176399381 63.6254894053045 47.3375061488583 63.2726414544553  
50.6666199323963 58.4891791448514 45.6355219961567 45.8180710486329  
49.2731519807085

KIAA1147 106.70211644918 128.356485935893 209.794541970107  
171.623830248512 138.50445813694 91.5618002664085 117.033529761587  
115.761674855716 104.103899614521 171.5709313654 110.146992754585  
154.945533851823

KIAA1160 100.63191957178 111.939677225005 99.7529382840954  
131.238796973323 140.504336039225 131.451150955309 142.515628954457  
104.587564056763 122.0305509548 103.385447205588 114.5696064637  
116.475941571644

KIAA1161 42.2455707947223 40.148780650831 40.5734458834617  
32.3671711013873 32.771863438151 47.2009420656854 35.9894133432376  
36.5393857306744 42.9020321355927 39.8873706855774 50.9815930710768  
40.5703581862752

KIAA1166 40.7609952437622 48.8584917918986 37.8386378737561  
44.4367387274922 45.4751076037511 40.5281496800812 45.223075311113  
41.2551966132486 46.3203995372658 47.611018474151 43.401782064778  
49.904979214379

KIAA1191 483.000434270291 281.07879968121 393.464673405634  
241.599353653369 291.596692248591 452.139416552986 271.674332647296  
331.762920362224 313.233036704221 451.290681710534 423.804472820231  
497.591040004541

KIAA1199 251.65044168003 116.374125502825 54.5191471810265  
337.156068385541 107.094663242259 45.0882356578404 57.7805922926828  
91.3607028449916 94.8408264309872 50.6486940895674 44.7926323492519  
129.336439341458

KIAA1202 41.7397731376692 64.9959712888709 73.0128142320238  
55.4180794172794 38.9496515344837 50.7516773099639 40.2154497375715  
41.4508241771315 40.7847110517594 54.0374522273907 51.7538628098347  
38.745552403895

KIAA1210 43.1805016690297 36.5219488315447 38.8775560911841  
41.0726336841311 49.0828761839116 47.0027453663546 36.3194282084339  
37.9837233601316 38.4344387289956 39.8873706855774 43.844855336215  
39.8497227447888

KIAA1211 44.0760877044901 46.1569135229922 43.4558010540988  
47.2797818740024 41.9495387255163 42.2006337556379 49.7495619589928  
47.5529788356555 46.3576476245409 41.6657053704762 42.1516028411593  
44.1915202657512

KIAA1217 240.314054155006 90.3691010312535 92.3034609409756  
57.6511495792664 86.8871118411414 63.6894484284172 110.223625398261  
103.366147685418 141.017696819844 174.584330660466 132.973097496421  
127.694844372277

KIAA1219 110.609133094021 87.6763065012524 150.801729138762  
100.774098314706 153.028210322286 75.353039684456 120.02765867291  
205.314410185216 158.884110481815 123.095695502815 125.494065483032  
128.365609268093

KIAA1239 36.1831439734485 35.6434124419782 33.9435456570176  
41.6045220683604 38.9496515344837 39.9777866059804 37.4772922422734  
40.831207953647 41.4636047919453 43.1839109702714 43.0016969050339  
36.1647506311964

KIAA1244 61.2130609867477 55.7405934254857 51.9214790114499  
41.7614975630362 41.9842695818285 42.5660695551615 54.339958888486

55.5578334877425 47.5564423692142 45.1569741609597 51.3861659123096  
67.4197263416701  
KIAA1245 40.9133663634149 41.1250236884325 41.1654477997049  
43.8550481835503 40.5349168203034 41.2226607554583 44.6861785933669  
41.9741368971524 39.2594097769139 41.1697539052486 40.970657220687  
41.7022936121242  
KIAA1257 43.2724556187214 40.5852276210998 38.6374490609417  
39.6292788039793 37.6527901109005 38.1699123824764 42.22763273471  
40.2770232552555 35.5631236789214 37.920964499903 39.7576136507593  
41.2437378488025  
KIAA1267 187.580695643466 199.480636964499 162.151812425949  
205.695230410884 187.347386400244 150.405742308999 192.318724749487  
231.472806936915 250.866560791828 439.955651727755 348.123960682064  
292.86576686019  
KIAA1271 55.7246872330059 66.0147097736612 61.6878176260761  
57.4595416719581 83.0497574039035 61.3620062177524 72.6959688212342  
55.9303347977781 45.9227107476843 65.2361525412756 96.6969760559963  
76.7791768896805  
KIAA1274 42.5193208629123 41.0678614026819 38.8775560911841  
40.9607305725196 38.6454098044474 36.1190722948669 59.5205055437765  
39.2672712041774 38.3418933808844 32.9003644440608 36.0481934423077  
39.8497227447888  
KIAA1276 57.2960245538881 53.2046867327331 51.8122261766744  
56.7927450229377 54.5683518971261 50.7516773099639 54.0170817319522  
59.5830868881343 54.7966692984192 53.8260140375214 57.5430365699386  
50.2163892855092  
KIAA1279 114.605149116084 142.49850553035 129.938114164087  
109.933396041701 144.139555313429 130.10148014895 114.711404298369  
84.7642634532073 248.058310353348 84.8999904158793 81.382229980722  
117.678385591938  
KIAA1285 42.9104454767916 47.765848710116 40.7620472083159  
33.1137701681495 47.4548471240051 43.6670755115848 46.5650556481721  
41.8417024632349 57.0301170427216 45.7911932481722 51.4413099192899  
48.4535991392809  
KIAA1303 43.0462952354436 44.8529259387308 46.4150464549477  
45.0017158586743 44.7210190486327 51.8103411703261 50.8388984085636  
51.7538628098347 56.8622704143595 44.4652605017595 49.1495645678651  
44.0451487108213  
KIAA1324 44.7915315085948 45.2556760873335 46.7508829977587  
110.666686474986 37.0526522140242 44.0804700754786 72.3515874601288  
45.8669209716694 62.8635815439291 45.6868589181768 39.153226699662  
43.4709415392696  
KIAA1324L 53.1309801459151 180.902423012987 190.403032965372  
59.6153684374766 68.7911855725594 84.096146903568 91.7761668960824  
143.399636653204 125.383837024985 144.609635554528 132.007307754378  
140.226992517573  
KIAA1328 46.7293238583888 45.5842286511645 46.2625470410195  
47.8164193292842 50.6470461863549 51.1621379498014 40.1235656101329  
51.0724630072723 54.4912806027381 70.7003843117511 58.5588286084726  
54.9919060580109  
KIAA1333 42.8036731479932 53.2046867327331 45.4865173433646  
42.0102671859606 52.9433495155796 50.9724155054821 44.7255207589606  
32.4466419672036 50.9010149857308 53.9412154719864 49.9338905397767  
49.2064066614865

KIAA1345 48.1952521496489 43.683792219729 47.5673419710251  
41.4273122914951 50.0580547772867 51.702461863489 44.0687697278114  
44.4031868028216 49.9162522057712 43.0919221375514 44.2142581488029  
46.1592873342534  
KIAA1370 154.232642598588 145.526972410673 129.501808300251  
153.595112580363 130.417782238512 122.036614711384 133.453860783605  
152.272399644814 169.001200403896 127.61938370689 134.335592890814  
118.376686726902  
KIAA1377 39.5676051939342 41.6466169548846 35.2838283525874  
38.745552403895 39.0564222526273 43.4681646416585 42.357910063876  
41.3506832276112 37.2810767789306 43.844855336215 43.0971787292711  
45.6692241948108  
KIAA1383 45.6517320730042 61.6878176260761 53.4088637045445  
58.5406981871153 55.6069214673486 44.6524308640784 55.4004611309636  
46.5717043290731 61.2510119532409 51.1169368198437 44.1148826235374  
50.2163892855092  
KIAA1394 44.8914371498528 45.6533175604486 49.9256753636167  
49.9014504704021 45.3675390992851 43.8582747295766 41.253645578517  
43.1567024035183 38.6322728994674 42.1622837416589 43.401782064778  
34.9138625012006  
KIAA1407 54.2999306485758 55.9007879696845 77.1111458359361  
54.7350451926204 59.9876575158981 59.9876575158981 67.8919712859031  
60.2691630545162 53.6837370963602 77.9820921829024 78.4962825977573  
62.2685634967698  
KIAA1409 39.3100256336821 43.3458769998118 46.1653991089885  
42.0621425894624 44.0451487108213 43.8308097066396 41.4369824439795  
42.2577689927563 43.4656637536244 50.294087888475 38.5252456306656  
45.4799270968969  
KIAA1429 140.961217055867 119.700522283289 91.6033269431304  
95.8590592250688 208.553134986809 148.3842032507 96.0539709962851  
83.2240772671045 118.089250727398 108.788705797019 104.873452487222  
100.289042948128  
KIAA1432 42.5193208629123 43.4396866157171 43.7630587657205  
44.7980740332174 43.5544347011646 42.750861693377 46.5650556481721  
37.7612949798895 40.6957787921451 38.2069499294002 49.8393069675192  
41.3481355128089  
KIAA1462 45.2875173643252 36.0366673493555 49.8344973836834  
47.2009420656854 46.0977687311222 41.0582900711341 42.8684958525042  
41.3506832276112 39.2809305246091 51.5855515705917 47.7535797917441  
41.6550823405646  
KIAA1467 62.928986708012 91.3941563889513 80.4060693489113  
56.9299697426319 88.3954618645976 62.843734579668 85.2088054619229  
64.7318794662958 97.8764110456132 137.831070407907 104.626873082138  
132.59650761791  
KIAA1468 83.2737524877952 101.192523227755 130.184962393833  
86.9274372004388 70.0133734659853 60.4991141099239 102.00080367858  
110.983311402531 168.655833116537 143.563236821003 154.19962858342  
125.512567429299  
KIAA1486 44.5282181324797 36.89524015739 43.4709415392696  
42.2496337895968 35.6434124419782 44.8872784170036 38.1793598983615  
40.3357777530419 44.8997235283254 49.1928206164702 42.6366765186182  
45.4799270968969  
KIAA1522 197.325473090277 326.121479451246 298.607482741423  
69.3525901554637 356.503013319738 78.5276518966943 219.555240189863

210.605371352247 269.044011137638 217.263889616995 171.829798001437  
217.533011278692  
KIAA1524 42.466333667839 43.3016395799961 37.7000400506818  
43.074472921841 49.6507190068324 39.4953494583071 38.7337086062875  
49.6629259325705 46.4861258030402 41.6373771565199 42.6776449468246  
38.4330755397458  
KIAA1529 40.2543341073001 44.3529919625344 40.1985790927248  
37.8442841690502 39.2608760193011 41.2567470068038 44.7255207589606  
43.7396619462033 37.6383530120621 41.6373771565199 41.2598458726002  
37.8490162439785  
KIAA1530 51.2851682978581 60.2165699959135 64.2174369755376  
69.4281256780421 55.9669688396835 49.3581578587582 54.4384603094793  
59.3923286524971 52.5120528339416 71.9805290614073 71.1163541406788  
60.5594938829162  
KIAA1539 150.685575301101 94.5261917871909 106.537423775385  
180.128769312512 62.6860949544223 86.915098846441 67.0455170947389  
80.1144023887293 76.2591822114739 118.726647822102 91.2202310968307  
88.9641595603127  
KIAA1542 43.0001432913058 52.4351670989268 43.6670755115848  
44.4367387274922 47.3172462673426 41.8613406887824 57.7805922926828  
45.642304356051 54.0192060888782 49.7259371799014 53.8856501960117  
45.0035308952466  
KIAA1543 63.1291723738553 70.9179240997848 86.3793067659925  
53.7155925246916 76.7556711670518 43.3269087731399 83.8811735017279  
70.9266654533052 83.1702007661831 72.1687283197901 67.9599395822006  
55.5276281380084  
KIAA1545 190.993853866124 100.774098314706 87.9871827215149  
80.1809075683154 71.5345397102823 130.716532316693 114.148080724618  
62.6984594468418 93.4980947651211 129.754481922118 123.032006903803  
88.6771566133367  
KIAA1549 40.2543341073001 44.4411734611229 42.157627240486  
37.7469621225553 45.5809132232681 41.2567470068038 47.7390230243778  
42.9301944191913 45.8325181856483 37.8217989841918 40.2649309204478  
38.9496515344837  
KIAA1553 75.9909523932333 51.2079772365211 45.3623491537646  
40.5484717678957 53.0965951260419 41.0057887014368 55.1359824959234  
79.9126192278104 49.7868528436838 44.8522313252892 41.6616444147804  
44.1915202657512  
KIAA1571 47.2862299990938 34.6306468196142 38.6727842796202  
43.6726153508978 42.7982502551634 41.6590564937735 39.8695929627783  
42.8482181313226 45.9227107476843 50.22432299342 38.079222289614  
39.2469742642337  
KIAA1586 39.3709357615493 44.0409178714232 42.157627240486  
44.4367387274922 47.6884372645373 46.7800033479223 42.4939802311136  
42.0494116081998 48.1174861108648 50.5252048155459 46.6442692119997  
45.9693232070002  
KIAA1598 204.251854342995 71.0935990523782 87.9152471471338  
269.857104259782 93.7924763988692 112.873697337138 116.555666104916  
208.67074469962 93.8042295944812 145.28255999556 107.044681610056  
120.73773749436  
KIAA1600 157.906415100288 220.454785391748 176.871009816977  
187.601223003233 103.199200862158 210.958578914607 146.701131209299  
133.314819245044 119.333788465158 276.214079735778 245.730139853029  
225.300736968225



KIAA1602 173.391542207362 104.650071846586 116.295564219236  
112.368910939752 111.399831013724 108.718422641679 121.737071786167  
196.623560874725 123.597489107285 126.814751973459 133.1387411908  
78.5108643908344

KIAA1604 51.413025495745 40.9731067463382 42.640829914102  
43.8002456102021 44.5668141895992 43.9724628401189 44.7255207589606  
46.695848687694 43.6670755115848 45.4614234442527 45.310660704531  
44.9070250604284

KIAA1609 77.2643026985097 78.3658211474135 78.080034922779  
39.3750969348308 51.5888395924843 45.4882438975269 47.8947595316832  
44.6107027295193 56.7991853808475 42.0621425894624 67.6271456814495  
73.6512983066046

KIAA1614 43.9309845324767 45.3486182278177 49.1067959632109  
37.4223289687135 34.6227169056411 48.3686935595826 47.2927436772465  
45.1714698794331 44.8997235283254 42.9866214102525 41.4508241771315  
49.1200355938198

KIAA1618 64.6316818494785 73.1262465119304 62.2685634967698  
100.344513700137 58.037539503209 68.2428802339852 74.6572522248684  
105.563773939475 68.8353800542132 69.3497375926383 77.118454956956  
80.7664399131413

KIAA1622 37.4554876386402 42.2577689927563 40.5734458834617  
38.5252456306656 36.3390947880186 35.9305494063137 45.1017494688414  
34.8949555140527 36.2733735494625 39.0648733099061 37.7384958256497  
36.5474283500601

KIAA1627 51.2851682978581 45.2556760873335 50.7502704822135  
39.9697332660833 52.3242437351389 54.2503023961401 50.6774883370457  
39.7509165247419 54.4912806027381 37.3179578037963 49.8393069675192  
52.1918130336397

KIAA1632 49.965271003193 54.7350451926204 51.7663108516261  
64.898351831341 40.8270141118472 46.8436815733702 43.5898425390297  
52.7107145265067 54.0192060888782 59.4019188643872 57.2979215534929  
52.7972156492746

KIAA1641 50.5252048155459 44.6918600441328 41.0356368374708  
45.6602029784334 42.2455707947223 44.1386689648017 42.7958064399619  
61.8061006855512 40.9416717019827 47.4356803320662 46.5421017969405  
47.8472928419101

KIAA1644 49.5666074434383 43.3016395799961 42.1901757067073  
43.367124590178 41.2424637338424 105.317399386109 36.5352572191451  
40.5158867964016 39.8048943625718 75.2053836356882 84.8808332740321  
71.9369353731849

KIAA1660 34.9138625012006 41.6466169548846 45.7968648044613  
46.3203995372658 44.3557408297309 44.7804080899431 46.9929836306816  
41.3506832276112 42.2577689927563 46.441301934328 42.170702295259  
36.6603338274678

KIAA1666 49.6751542251638 46.29198852834 50.5089777244781  
55.6481366056639 48.7814131120945 43.8308097066396 47.5130990528612  
42.9301944191913 48.1174861108648 54.4190527512508 47.1098984140276  
43.2776458914333

KIAA1671 233.789761419387 132.946528291039 123.597489107285  
93.3216420803293 175.922685424474 219.134220280612 168.345356470411  
199.522267292552 228.469654751393 252.206029058968 222.696947669812  
202.230726475934

KIAA1683 46.6348258763289 54.2445399731644 54.2670850492947  
43.3078542962968 39.1650142708257 55.3202238943712 60.3928833351886

55.8087097725119 66.3209349903185 61.6670071424359 47.5439485437351  
55.1804535845496  
KIAA1688 384.727543700024 224.60637398191 130.848965290163  
61.5515639412892 205.772128732705 72.149478755262 271.813877560354  
216.744244428166 195.740109330843 80.5388767883646 94.428252478069  
67.8335962843732  
KIAA1704 40.2543341073001 40.5400384479766 42.3887531663733  
42.0621425894624 42.4493032770053 42.8598805316863 41.706879587091  
43.6753843488695 41.6340461942423 44.3303034026662 41.7272875295469  
40.6216891610774  
KIAA1712 104.335120306753 123.350559552455 116.490154128114  
103.607345835114 125.383837024985 134.749803376372 117.634238804678  
110.715042245563 120.825113658705 185.079035617027 165.640362974584  
158.532307373857  
KIAA1715 109.326279686847 112.02980664709 110.061090703983  
103.734064904898 95.9075629352341 109.795084617739 130.058147569795  
123.114162330406 137.438636654385 144.348025939706 143.497887869284  
99.3344676796884  
KIAA1737 207.380865650247 118.507569961357 133.893108529325  
127.225812893692 143.639231185825 244.907057340556 158.702003835578  
165.322633260592 180.916465721523 271.104193102849 306.895449954881  
220.192552354287  
KIAA1751 191.141778714144 127.352997770688 150.636903991608  
200.986069552443 120.392561825049 119.253559091088 169.144145421022  
299.665413950641 107.348865210074 335.167786298149 283.30253361072  
227.059460958349  
KIAA1754 214.342804055754 140.288771064502 169.344094528032  
605.970682363975 157.312247745825 211.701234819986 121.737071786167  
281.452208033175 108.27606179864 105.212030988223 115.496195377983  
138.599959012396  
KIAA1755 38.0089018744739 35.2143190355414 39.1799070031819  
36.264823544143 42.1650127805175 31.1150868775826 42.7431359850339  
36.8400213077707 36.3649677956953 39.0648733099061 35.6970528713709  
34.1509644696334  
KIAA1772 40.9558083259517 36.7976562409506 36.3604951341921  
48.9944486068347 42.7982502551634 39.9397419279057 44.9863726205428  
41.5464765641928 44.4395580493118 43.7303813515864 46.2560238004757  
50.4847465816184  
KIAA1787 116.685453817071 84.4596873416863 99.6101168315098  
79.1000897258245 95.6182216943758 90.99086730704 98.5663841503803  
100.887736959095 79.1074681877535 107.610858427836 99.6288131333575  
73.9192243586276  
KIAA1797 116.311176407088 116.295564219236 71.6573554353691  
81.6780581904253 95.6182216943758 110.399579382196 78.4937314423253  
75.4935574755043 82.4467808843629 100.076931518374 99.6288131333575  
96.5813769696577  
KIAA1804 43.2724556187214 51.2405397507224 47.0940613507321  
43.7540438144592 53.9074374788981 43.5416683728269 42.6913548400127  
44.7044140979108 48.5136862664526 43.401782064778 43.401782064778  
43.5738557773903  
KIAA1826 137.696331574552 139.999709303614 102.330999847292  
165.606015336587 195.512986297442 181.950503247343 143.761359357965  
102.626604917608 113.218291314173 170.420427857495 172.83517237888  
153.992331037033

KIAA1841 35.4287975493553 35.1224289925572 32.821392987958  
34.4382958501338 29.6891949090828 34.9849896310235 33.2425023465738  
34.5886782974123 30.9241129241985 30.3383368296776 31.6063174764616  
31.372171135652

KIAA1843 44.7044140979108 40.2493681589104 36.3604951341921  
39.5050383901884 39.1650142708257 39.0266821712099 43.6753843488695  
41.1575777497576 42.9020321355927 41.3321861371202 43.4709415392696  
52.3896785600751

KIAA1853 42.3433931248155 37.5469247328848 40.6737160001291  
57.2856683017619 42.4864576619427 37.7000400506818 42.1607322031054  
42.2577689927563 42.1594905198929 36.2435874904689 38.745552403895  
36.8690774823319

KIAA1862 60.8357760968871 67.2649356062263 54.2670850492947  
53.9517841438975 76.6914642534934 52.9482338979681 77.118454956956  
58.0892402609917 58.174555206394 51.9547984751408 61.7572675712557  
58.4200819624972

KIAA1875 55.5276281380084 113.929486370331 56.8595344107711  
48.309866878365 77.6174893940285 44.8872784170036 58.2315917325629  
57.037639245179 61.7865043876727 60.7495043977707 58.8961770381033  
55.0767527801658

KIAA1881 55.2182004838121 115.840734064724 220.743173420176  
85.1847490113446 279.448591201269 599.670771796585 102.626604917608  
131.068763088422 195.430996540859 327.283431584541 437.542517888395  
309.06234888929

KIAA1906 40.9558083259517 41.8848959280916 42.9104454767916  
38.3166554965434 43.3332476888305 41.0582900711341 42.4939802311136  
45.7476095696859 50.0526763693329 49.6203214143464 45.310660704531  
48.4535991392809

KIAA1919 42.1537476443423 40.716553247236 41.8751578329365  
41.0726336841311 40.148780650831 42.750861693377 35.9058393060637  
42.0494116081998 40.6957787921451 46.8954576545929 42.2618615571566  
44.8372404608604

KIAA1920 46.1673159982664 41.554942319225 40.931294690669  
41.8778873678551 41.5668884168669 42.9695585740813 42.7431359850339  
40.3357777530419 44.5303781239209 45.4614234442527 45.9104478407175  
41.5536168238478

KIAA1922 39.0620487644635 40.5400384479766 44.0451487108213  
39.5050383901884 40.7779767565889 43.8582747295766 46.7100796279384  
35.4526946152955 39.2809305246091 40.3235655331796 40.2649309204478  
41.2437378488025

KIAA1949 262.679844527518 257.584248252408 207.833867050257  
668.961646543849 162.902264837659 350.796638646601 211.019451518444  
150.262748333939 108.27606179864 130.812376632261 128.559660070271  
148.570371099987

KIAA1957 43.6706764143908 42.1607322031054 43.1931731665131  
40.3180310664156 37.4470183315826 48.6621527194963 43.6753843488695  
41.6466169548846 43.2761454096265 40.6022003765153 44.9713479185144  
43.3744503319109

KIAA1958 42.9104454767916 43.9421822132391 43.3085358214154  
39.5050383901884 51.7983110178095 45.8325181856483 58.0969258817391  
44.6107027295193 39.9444191873552 41.3321861371202 49.8393069675192  
49.0655215909632

KIAA1967 84.3338099925204 59.0457625163577 66.8188271427672  
53.8086134112366 57.6791750431251 60.3381680822012 60.8942621888353

58.0353195691931 73.5950442915143 73.2956678446902 79.7992359774565  
76.7063975550116  
KIAA1975 43.0001432913058 46.1569135229922 37.7384958256497  
45.334106390212 41.9842695818285 42.750861693377 40.9157352260901  
42.4580504587581 48.8842909466002 47.3791873993182 47.0940613507321  
45.0985088502363  
KIAA1984 47.6397712007919 99.864496342189 69.3468840908665  
54.8412943008635 42.269054475455 50.9724155054821 43.3262148375525  
40.931294690669 44.619512785899 54.7827221235949 46.4753015651202  
45.7562276914441  
KIAA2010 170.307603160524 99.2341244350412 194.827750623463  
183.028254350275 141.055218279065 145.791398829369 128.208688034402  
109.573199664599 195.543760781509 150.829277770546 141.672695206961  
157.133627517432  
KIAA2013 425.776214512634 247.511892014861 284.868613843826  
232.740032714891 357.029998842776 268.808342880355 296.463473585355  
356.948763043851 298.313562383092 298.607482741423 263.125290391542  
200.450523205251  
KIAA2018 41.9407041937973 33.4967065724734 33.1559412791294  
37.29566077996 34.4570158133896 37.2686490268265 35.3362091871364  
47.4740726032707 38.3418933808844 34.2638875325204 34.5633623842083  
42.0424641526302  
KIAA2022 36.5393857306744 39.0894172982439 38.6005272730664  
38.0958223740111 32.0568298766078 36.1190722948669 39.7576136507593  
36.43924066428 39.9444191873552 39.9948390976317 34.064698871541  
29.9775071862804  
KIAA2026 81.8569832022381 104.796373568883 74.6514558411477  
108.838406710326 75.3580625318157 97.3310111513156 79.6581393791238  
84.3040298294164 82.7471156870608 95.9485602132766 113.964753321316  
101.2825552085  
KIDINS220 550.100918659768 344.38057912034 256.55408314817  
299.890705180422 295.430709655678 448.196293409768 450.865888317246  
869.879392791086 413.990148966099 343.418685340038 404.86512250958  
315.139359883556  
KIF11 75.2923395421694 147.471179343348 96.9569547595983 73.5834042105313  
137.509582795609 55.4345579421782 195.262845535544 109.922909644299  
149.950764820034 42.233842834629 49.6706535876636 42.57175366709  
KIF12 47.5647821785529 47.4740726032707 41.8751578329365 44.4367387274922  
47.3172462673426 46.3715909653832 51.4349390827895 49.085741080241  
45.4799270968969 45.7911932481722 48.042366934301 37.4554876386402  
KIF13A 36.1232327599945 41.554942319225 41.2365089689635  
47.8164193292842 49.32293280121 43.3785777889265 43.3262148375525  
55.1933004802607 40.6957787921451 43.9450023643394 47.6125796208753  
43.1805016690297  
KIF13B 341.666968456707 144.633447485038 217.575115287224  
157.518879763075 69.0975200641705 166.648551193168 107.466490458133  
134.407474121421 79.0276852011359 312.154320305976 228.882072078733  
246.965844426351  
KIF14 92.843017373656 70.1831787109201 71.5484567134601 49.9014504704021  
119.291755076832 55.7197525213035 87.6018870099686 98.8478655411492  
78.055431384988 41.6373771565199 45.5707650534259 48.0350549043063  
KIF15 55.1306642449627 68.5251167137806 61.6878176260761 46.1673159982664  
134.981483569602 57.013135787334 125.997088252817 83.3826639718546  
68.2372031645261 44.0409178714232 45.4799270968969 49.3984571719129

KIF16B 56.5094373275922 67.8208976798364 84.7851173379268  
67.1961800572759 56.1733549054832 73.2144205844199 72.0112676564347  
53.9465584609317 57.0690683036183 67.5047089908724 69.3645322033576  
82.8888969977394  
KIF17 43.0001432913058 45.4143854024453 38.3166554965434 43.8002456102021  
35.6434124419782 43.0860383229288 44.7255207589606 42.5435283762933  
37.10170285405 44.0409178714232 47.5439485437351 51.8562635270111  
KIF18A 41.0970259989281 45.5587966941116 41.0356368374708  
42.281606728072 44.5092684716474 47.3791873993182 45.6706505553383  
47.3172462673426 55.2485665256307 41.0608773166058 40.4094901248527  
41.8200132437731  
KIF18B 39.7576136507593 44.3187284857534 44.1915202657512  
43.074472921841 43.8835874380262 39.3841861812262 41.8315602975157  
39.6995529770239 44.8003345643334 38.3092241935352 36.6603338274678  
39.9941474864076  
KIF19 42.6036491382658 44.5152708955623 43.7630587657205 40.1804147506786  
40.2449343247539 42.9695585740813 41.3594868055879 38.3684202018524  
39.5806465938526 36.0481934423077 41.2598458726002 42.1537476443423  
KIF1A 59.5000730792772 45.2556760873335 39.9101908547397 53.3967242431461  
68.4961024593552 45.7300501624017 49.1067959632109 199.23413224268  
37.10170285405 40.6022003765153 40.1742127891824 40.7704587752083  
KIF1B 179.09303345382 82.8205269728224 86.3458707176254 139.625593914573  
102.597012252626 144.116701129933 110.88526946931 183.526640731647  
98.4763347474813 201.145927216439 149.8814624626 148.514056973195  
KIF1C 53.7507429765038 65.3694267397114 56.2441895183416 42.8235313007746  
50.0580547772867 58.0095518210499 50.5252048155459 49.8344973836834  
42.0621425894624 52.8928296360463 57.5430365699386 49.2064066614865  
KIF20A 157.658760470424 235.101442092497 173.08677862231  
84.4422623834916 326.963277148673 60.1042270393382 219.036267470696  
177.958475301951 331.239629083778 41.2276963324981 37.2018803984555  
48.4535991392809  
KIF20B 141.364814429951 115.321592104747 115.468303687641  
105.790224260281 153.279284223069 91.9459432547337 152.17335005192  
143.653706909456 176.02137177982 86.2118355769367 82.0206083292981  
64.7346994616044  
KIF21A 58.4920021605316 61.1452879517526 57.9279989359711  
48.309866878365 63.1443731864055 62.3497263884167 64.0985088513857  
108.945545005203 93.8042295944812 57.5713378330876 64.898351831341  
71.381069076765  
KIF21B 45.1479346191482 45.6243792564364 45.8409758448533  
44.4367387274922 42.3685136297603 41.3012916486748 45.1679144865704  
50.7964800730186 40.9901805728485 40.5090849993014 40.9696219937838  
41.5916331278821  
KIF23 64.4415447415281 69.4583814833055 53.2046867327331 44.3440839686558  
87.6178717341967 40.650742261428 78.1204313889396 66.5694839794116  
79.1305209735569 42.0621425894624 41.5421429082231 45.3763275588341  
KIF24 46.9939712192224 48.0570064280814 43.0016969050339 38.4699622716254  
45.6895223823001 40.8091178323174 52.1918130336397 51.7121586468362  
50.2223403889892 39.8873706855774 42.4162492820012 43.3262148375525  
KIF25 48.5123041297835 46.29198852834 42.5864346233886 42.6913548400127  
44.4031868028216 50.6915708372926 41.3094485574845 42.8936990772838  
52.8190882379316 50.4234835272833 43.6629145624937 52.8974363028468  
KIF26B 71.4937262725923 46.7980335276155 42.3536549114165  
50.6262443356159 44.4031868028216 42.4155142987678 46.5650556481721

|        |                  |                  |                  |                  |
|--------|------------------|------------------|------------------|------------------|
|        | 53.4109882045447 | 48.4869909888679 | 41.6724739851995 | 44.6834648302383 |
|        | 44.7401523707775 |                  |                  |                  |
| KIF27  | 42.5615835912214 | 46.3319769551314 | 41.4727452533295 | 44.8854076849881 |
|        | 41.7530073084919 | 42.4580504587581 | 43.1593895157816 | 43.0877002403108 |
|        | 40.2630560420191 | 43.149950256043  | 42.2518289437063 | 45.1390218677367 |
| KIF2A  | 157.658760470424 | 154.984589017187 | 131.156876010639 | 117.699959435983 |
|        | 131.365512154718 | 89.4747568145717 | 166.009268520425 | 99.5192591352063 |
|        | 158.493140172253 | 93.8630393470857 | 102.027922691582 | 136.20629436945  |
| KIF2B  | 39.7162631015511 | 42.0709558258414 | 41.9666541498638 | 40.0322420615846 |
|        | 42.3685136297603 | 41.2567470068038 | 42.7431359850339 | 39.1652965788406 |
|        | 44.293922970134  | 43.8710182120571 | 41.0808257270221 | 41.3481355128089 |
| KIF2C  | 135.829530518199 | 101.426462865382 | 73.6323065529916 | 58.0218262176065 |
|        | 157.161381086926 | 52.6226745117396 | 217.848539722853 | 146.426853713038 |
|        | 158.408644964483 | 46.0119912782855 | 43.401782064778  | 51.2318935933116 |
| KIF3A  | 35.8208542506595 | 42.2577689927563 | 38.6727842796202 | 34.3595588146954 |
|        | 34.5301949364147 | 39.0266821712099 | 34.806104801006  | 37.4484310268909 |
|        | 34.0382693188794 | 33.8984830800739 | 39.5399188536544 | 35.4484652445078 |
| KIF3B  | 112.506613718654 | 111.109515944561 | 110.112236384679 | 97.5849495690144 |
|        | 133.541341560868 | 135.11808699414  | 106.712703356565 | 97.0589984189239 |
|        | 126.711833914667 | 131.645714321903 | 130.524308471577 | 118.966448789057 |
| KIF3C  | 55.9249770393176 | 61.1022920882065 | 53.0630927250439 | 50.378948785456  |
|        | 52.8190882379316 | 54.5952754712007 | 90.0682241853516 | 169.790843803064 |
|        | 64.7116910405493 | 53.5498255316009 | 48.6767028205398 | 42.9887069977696 |
| KIF4A  | 63.5693267269002 | 61.1022920882065 | 50.8303921211581 | 42.1273928203021 |
|        | 86.033725825968  | 40.5281496800812 | 81.9504925867759 | 69.1973371867031 |
|        | 125.946162432491 | 40.4136535208406 | 40.3452320167286 | 35.4484652445078 |
| KIF5A  | 42.0532901689036 | 41.690833180291  | 45.4865173433646 | 42.281606728072  |
|        | 42.7489468897708 | 42.157627240486  | 42.4939802311136 | 46.5717043290731 |
|        | 42.0126083977597 | 41.3321861371202 | 42.6776449468246 | 48.8319884367456 |
| KIF5B  | 151.936097714553 | 237.532800487032 | 194.317275235015 | 157.095926797414 |
|        | 210.73006676203  | 388.458756841292 | 147.010700944686 | 147.017279035061 |
|        | 266.905855859261 | 76.2533853403813 | 120.679433440203 | 229.547114945412 |
| KIF5C  | 103.808640431626 | 126.054896053572 | 52.5353664902258 | 51.2973486610884 |
|        | 54.3116862772198 | 56.9635892586579 | 120.582525405708 | 98.2074490157865 |
|        | 51.1055541075029 | 231.824347524066 | 142.647217549267 | 112.220892096054 |
| KIF6   | 58.2902084992082 | 49.9085372049438 | 51.7138050344355 | 42.5664883002833 |
|        | 52.9433495155796 | 45.0882356578404 | 59.8273072817267 | 53.1052228246467 |
|        | 55.2114969675545 | 54.4825201506931 | 54.0374522273907 | 50.656598108034  |
| KIF7   | 71.3900857589616 | 57.4054069675016 | 58.8188963227059 | 59.0965219753805 |
|        | 98.6553805168141 | 80.8333046859586 | 72.8653205184014 | 74.0831311663524 |
|        | 61.5807110546718 | 82.6036671634626 | 96.1307490576512 | 69.2213838763756 |
| KIF9   | 39.2076937845359 | 47.5203201376024 | 39.1799070031819 | 37.8442841690502 |
|        | 40.4321207743917 | 42.5660695551615 | 43.3262148375525 | 41.4061152929154 |
|        | 42.992884918158  | 45.4882438975269 | 39.1878770155069 | 40.5703581862752 |
| KIFAP3 | 279.632025097952 | 118.143444770806 | 147.945429978177 |                  |
|        | 154.287396750021 | 101.156215957297 | 178.269900400454 | 136.629336440719 |
|        | 172.89937021234  | 97.8009303343756 | 184.65212689433  | 153.595112580363 |
|        | 178.98901256658  |                  |                  |                  |
| KIFC1  | 532.981045084589 | 349.096725048776 | 168.388385941598 | 98.5663841503803 |
|        | 370.64147085217  | 91.8295472317386 | 647.297964303385 | 343.50519530761  |
|        | 375.036941898486 | 62.3997407955361 | 49.2206713037152 | 59.4465684293847 |
| KIFC2  | 132.604567913122 | 306.94883838074  | 256.55408314817  | 75.9099205260748 |
|        | 132.117013391364 | 56.6172748471831 | 120.231435193839 | 78.9900928241723 |
|        | 130.533514998688 | 190.888188882162 | 211.654245727798 | 123.114162330406 |

KIFC3 47.5647821785529 44.0409178714232 39.5450079747895 43.9282059368202  
38.1644569189523 38.8336427948187 51.5967098638347 35.3608605269276  
46.6944238390932 36.1550293353654 39.5399188536544 39.3575468494941  
KIN 45.5758521267508 43.0971787292711 44.1452943804044 41.5464765641928  
47.8075998240396 46.263826584899 48.9826868640753 43.3262148375525  
41.5635499110307 45.1569741609597 46.7386599624801 44.1452943804044  
KIR2DL1 41.7835997867848 39.3667161654772 40.439898672334  
41.6045220683604 38.2083710281545 40.5281496800812 41.5817737564592  
42.7965563818112 39.8048943625718 45.2556760873335 37.1604861088456  
40.9149601380325  
KIR2DL3 43.6706764143908 44.2105195734073 43.0971787292711  
46.3203995372658 40.3452320167286 39.2248354955045 45.6706505553383  
50.3344433595166 41.074824727477 46.8292269513767 39.9070785037411  
39.2469742642337  
KIR2DL4 44.2760426402717 52.502055890816 41.7364024833895  
47.2009420656854 44.5152708955623 44.2335949843431 45.656343062947  
50.0991178780329 44.9580538951069 44.9603714724456 42.5153507543837  
46.4499258373233  
KIR2DL5A 37.3925854497082 39.4693871570028 40.5443356330931  
41.8203235468665 38.9953561482209 43.3350508941896 41.74510997753  
40.6783687486496 39.2406797798509 39.5196946310402 40.0400013787864  
38.9126372022985  
KIR2DL5B 38.8336427948187 41.0678614026819 40.8846826807717  
44.550322123994 39.3999056968598 41.159706131351 38.5474297403025  
38.7215839727591 42.2577689927563 43.0919221375514 39.3667161654772  
43.1235886043549  
KIR2DS1 40.9558083259517 41.9894412416874 37.3404647796601  
38.6414316877471 44.2607789091176 44.4311655729487 41.0871827071116  
39.8965727231863 41.2424637338424 40.3235655331796 36.5359455830388  
39.1553169409075  
KIR2DS2 38.2083710281545 40.6380495994768 43.9450023643394  
33.9645433044281 46.7508829977587 40.244271403831 40.1235656101329  
40.1474543172332 40.4220196471124 35.6208308220005 41.1638563416981  
42.6758568421347  
KIR2DS3 42.9104454767916 35.3307157989724 36.3604951341921  
37.3600014814388 39.5595233162192 35.5523662009011 42.0605906240248  
37.7217193704498 41.1742244762318 36.2435874904689 37.5343260962758  
41.9741368971524  
KIR2DS4 37.4554876386402 42.1607322031054 37.2838080935695  
34.3595588146954 40.5710637884029 41.3553369544097 35.6056062164318  
35.0510338774593 42.0621425894624 36.2435874904689 39.9899430628542  
43.5738557773903  
KIR2DS5 42.6036491382658 39.5050383901884 42.4580504587581  
43.3078542962968 40.5710637884029 40.7616966228404 47.4439407315335  
42.8482181313226 38.6322728994674 38.528621456378 47.6125796208753  
42.8864415494484  
KIR3DL1 43.632365631458 44.6388394563024 40.8420925848403  
41.8778873678551 37.6119337673806 42.2577689927563 41.4186558780356  
44.1642484298135 40.8420925848403 40.3235655331796 41.2267153672559  
39.3789825717286  
KIR3DL2 50.5670783769975 45.1694246393676 40.4882741869718  
45.0798408927912 46.1804647841331 45.6129956328415 43.8206425661746  
43.3262148375525 46.7760357462635 45.4614234442527 43.7585538437696  
43.4709415392696

KIR3DL3 40.4179476219497 36.7976562409506 42.6920011548175  
44.7980740332174 43.5836473788312 38.385865183581 38.8417151851134  
40.8833572570383 43.3262148375525 43.8943892311541 38.8173773425835  
42.7782216342806  
KIR3DP1 39.9697332660833 44.6918600441328 40.4070046183108  
40.3180310664156 43.3332476888305 42.2577689927563 38.6243997507646  
45.2806199505029 50.401623258584 42.8936990772838 43.0971787292711  
38.3291713594599  
KIR3DX1 40.0557788909923 42.7775752471711 42.0621425894624  
40.1804147506786 41.7929491793697 42.5660695551615 43.5627649099623  
46.2779564481158 43.7630587657205 48.3693338695392 45.310660704531  
43.2776458914333  
KIRREL 38.2083710281545 43.5873188565519 38.7745734037492  
38.8495095797881 41.8806343997257 38.5252456306656 38.5066108855005  
43.3262148375525 39.2809305246091 44.2580151149956 37.6484782516569  
42.357910063876  
KIRREL2 40.148780650831 41.413768254554 40.1572444265517  
44.4367387274922 40.5710637884029 39.1650142708257 43.9450023643394  
38.7981173437121 43.0930293831497 37.6383530120621 40.7776803630095  
41.1801554437554  
KIRREL3 38.8561375693335 36.4002279956519 33.6816578730693  
40.4359177791566 36.5393857306744 37.2686490268265 37.1643693306382  
36.9355798143571 40.9901805728485 39.6719190054379 36.2435874904689  
42.4607795638552  
KISS1 51.7607563002005 48.7847528954724 57.7415362494584 40.7481155008596  
65.3019328668633 40.1428591998404 116.913991315353 71.9771425105735  
58.6431245059655 47.7180816682562 65.088713927995 83.105117076029  
KISS1R 135.106756607914 49.83247261979 50.2869791217819  
43.9282059368202 138.895316905243 48.5835484742456 47.1345949868029  
42.2577689927563 188.36429659391 41.0057887014368 41.0050831223107  
40.0557788909923  
KIT 76.3435517544167 64.3640973625938 180.222765336208 101.250422688816  
63.955655956484 451.437791473506 174.559216176175 116.694275999729  
360.342857415756 214.127390534906 165.349426587915 344.985739524681  
KITLG 51.6558970571712 44.7255207589606 45.1912496459517 41.0726336841311  
38.1644569189523 107.513442725922 39.5496902678788 42.8899872337087  
46.7483258592567 59.0336440347545 52.4752641497096 49.5143331736386  
KL 43.1805016690297 43.8495248991589 46.9040704638073 45.1944222548351  
39.4693871570028 55.7197525213035 47.5963750520409 44.797320243931  
44.5303781239209 54.1683282066029 55.854474649572 45.7562276914441  
KLB 47.2862299990938 44.5884811528117 48.8941062980393 40.5484717678957  
58.7460488758053 52.8421046802739 42.357910063876 44.5029690493211  
44.8003345643334 40.2112371512838 45.6348103033479 44.6484005362281  
KLC1 195.127419251015 109.386655134289 164.462951076718 152.146012870339  
135.106756607914 234.615033303459 185.264053754114 191.482692108417  
188.912691033518 209.401109514058 240.314054155006 182.80711310964  
KLC2 45.0241191707651 48.7084357480922 45.8844325913247 40.1321264723693  
52.0042367882776 47.6280023169526 65.2966707319433 44.9977782988116  
43.1235886043549 43.4885245598939 54.2999306485758 46.7577982595088  
KLC3 43.2028319630577 39.9697332660833 42.6861857638473 41.8190986513051  
50.8460732110055 41.7309289572934 51.0572809855463 56.2441895183416  
48.0163377492228 38.3092241935352 38.9953561482209 42.0778399888414



|       |                  |                  |                  |                  |
|-------|------------------|------------------|------------------|------------------|
| KLC4  | 42.267010764315  | 47.0130468198828 | 40.3458948319669 | 40.1385934541471 |
|       | 42.4514311150237 | 38.0712544534799 | 43.26160898693   | 41.3012916486748 |
|       | 41.2870505273664 | 41.6724739851995 | 38.2293008890613 | 44.0970208808899 |
| KLF1  | 42.442231667357  | 39.6995529770239 | 39.4710743516517 | 37.0732977341185 |
|       | 40.9950639693255 | 47.2009420656854 | 44.4639405506967 | 52.3068458655445 |
|       | 46.6944238390932 | 50.7855742231932 | 45.9104478407175 | 42.2577689927563 |
| KLF10 | 60.8357760968871 | 58.6249721386149 | 69.8832723783498 | 72.7934987008399 |
|       | 53.4921736109774 | 102.212684008752 | 48.4859552186772 | 47.7889447429963 |
|       | 68.7952490738858 | 42.0217776707284 | 48.8088340735921 | 53.3904307221902 |
| KLF11 | 234.556113280762 | 135.836577310513 | 109.901105821696 | 191.59357986481  |
|       | 106.383332356527 | 258.913621521866 | 222.16475904496  | 335.655540947167 |
|       | 137.764748752401 | 195.146655512672 | 207.768377497439 | 194.435776102991 |
| KLF12 | 47.3388629326073 | 47.8020258652388 | 49.5923712603197 | 64.4512696384839 |
|       | 41.5335058664597 | 59.9546218258435 | 44.4639405506967 | 41.5464765641928 |
|       | 52.0042367882776 | 52.390086161937  | 49.3533917376456 | 49.0048900199083 |
| KLF13 | 225.827961496781 | 148.333778341005 | 149.639066617945 | 324.320137371059 |
|       | 74.2283328056604 | 233.468474830926 | 67.7965120293445 | 120.552647575158 |
|       | 81.3858672064773 | 99.3142021810133 | 119.846620703059 | 137.239944506217 |
| KLF14 | 35.0202257459026 | 39.9697332660833 | 43.0971787292711 | 42.2496337895968 |
|       | 41.2740822675592 | 43.7630587657205 | 40.3302268293707 | 41.5464765641928 |
|       | 42.1594905198929 | 40.2112371512838 | 36.0481934423077 | 44.7401523707775 |
| KLF15 | 53.3967242431461 | 46.8954576545929 | 52.7005092555102 | 57.2856683017619 |
|       | 80.428712610358  | 71.7585486695516 | 79.7564155881026 | 49.3880946790306 |
|       | 51.5888395924843 | 75.3333024462557 | 73.845912534353  | 80.0381580139229 |
| KLF16 | 43.1805016690297 | 39.6123051184545 | 39.5450079747895 | 36.3604951341921 |
|       | 41.8806343997257 | 40.3357777530419 | 42.8684958525042 | 40.5158867964016 |
|       | 45.7452456977857 | 41.6373771565199 | 44.7926323492519 | 38.3291713594599 |
| KLF17 | 43.0001432913058 | 38.5252456306656 | 38.9790184198145 | 39.7411455670172 |
|       | 38.8456942580061 | 43.2805590023412 | 35.2163900400329 | 37.4484310268909 |
|       | 42.5406888281114 | 41.1222709786153 | 36.131485826118  | 40.3691324547049 |
| KLF2  | 797.019657306322 | 1433.1813604069  | 1956.75875151802 | 1442.72006787259 |
|       | 164.462951076718 | 3484.65337999238 | 341.302185430613 | 471.734457300752 |
|       | 95.8075612515186 | 959.549658414082 | 1408.59798540643 | 718.832367050609 |
| KLF3  | 47.2862299990938 | 49.4493009852254 | 44.825830634601  | 39.5637454855233 |
|       | 52.4370718282084 | 44.5544727111028 | 42.7431359850339 | 49.9951674107458 |
|       | 54.9426456410692 | 42.6793753550854 | 43.4709415392696 | 43.6434576713809 |
| KLF4  | 61.2691385007595 | 392.008276951929 | 84.7851173379268 | 192.98559983091  |
|       | 58.2780916793348 | 336.904716156626 | 82.8485522398913 | 144.116701129933 |
|       | 73.9986015964321 | 106.160416826673 | 91.9375312869437 | 99.9951025176909 |
| KLF5  | 51.413025495745  | 76.093116738739  | 63.5107036952143 | 35.9521941716188 |
|       | 63.25187762908   | 49.4157684139858 | 71.193768715137  | 63.3768687067745 |
|       | 133.453860783605 | 87.9206275762349 | 70.8670844767965 | 67.7662831916293 |
| KLF6  | 583.690350347288 | 756.801598119483 | 594.611678976716 | 1183.62228577053 |
|       | 410.402285012885 | 936.978983469829 | 1401.46625360427 | 1716.82239359769 |
|       | 383.578947165143 | 379.280296622892 | 790.094848284547 | 644.368005872231 |
| KLF7  | 47.3791873993182 | 36.9994058279362 | 33.6816578730693 | 40.7481155008596 |
|       | 38.2496050953547 | 48.260931742163  | 34.806104801006  | 36.43924066428   |
|       | 39.4762546236449 | 39.8873706855774 | 41.5421429082231 | 38.8495095797881 |
| KLF8  | 65.5495324730507 | 49.6841415268611 | 48.4890615340603 | 76.7806009547111 |
|       | 52.8190882379316 | 66.295597720304  | 66.3209349903185 | 97.1271615802556 |
|       | 62.275808835675  | 62.6984594468418 | 66.8842530423095 | 67.1675878355908 |
| KLF9  | 323.295794446334 | 228.328635242684 | 372.642038290698 | 993.626865290891 |
|       | 398.229956085523 | 1769.18069954113 | 168.145003400654 | 432.669787408904 |
|       | 165.942795019496 | 465.266372824212 | 578.311131274653 | 833.136660528149 |

KLHDC1 40.0988483617359 41.9894412416874 41.1742244762318  
46.3203995372658 43.004943518025 44.7044140979108 39.3999056968598  
45.1151758109609 42.0126083977597 41.6724739851995 41.5668884168669  
39.9941474864076

KLHDC10 49.0462740100128 50.543526404059 52.4485219671976  
42.7489468897708 52.3242437351389 51.9421032049606 48.3411413510851  
45.2230753111113 46.2027193115397 39.8873706855774 46.824299585607  
46.6397391251762

KLHDC2 226.262409390222 302.667538432677 280.202284365004  
198.010793115588 142.731630650904 372.239177888445 58.5087296620514  
286.243476131448 246.869486382264 432.669787408904 288.023490151593  
395.546110689003

KLHDC3 552.860979481958 323.855522995794 350.796638646601  
258.589426470951 454.02808608679 396.355023788839 566.77872642437  
266.687281047486 369.717462266442 344.985739524681 366.915943380617  
410.157894910571

KLHDC4 118.614027673431 121.236881661832 156.08027400493  
96.9476136220382 176.670909065664 108.847044476692 134.024691118762  
126.882948837851 99.9057667432209 122.924027019519 131.045615546105  
68.2309359831273

KLHDC5 141.649461526745 119.088986733238 97.3066473777771  
115.048869605875 112.391188787919 510.525676243746 138.436822676252  
117.723425661764 119.700522283289 267.475563253966 283.747865829282  
316.185342210304

KLHDC6 34.5886782974123 59.0709442090059 57.423873475544  
37.9875302985336 37.956732373465 33.6859433472087 41.4742337714895  
36.7460922671619 44.8997235283254 98.501431740607 54.8532558909227  
45.8546719310325

KLHDC7A 34.8099089553046 40.4359177791566 44.4311655729487  
44.6905691366696 41.1868052124344 43.0860383229288 44.0687697278114  
49.5185112777773 39.853866204927 50.7855742231932 43.4709415392696  
41.0657892043496

KLHDC7B 38.6454098044474 45.0905928998779 39.1799070031819  
39.7411455670172 42.4864576619427 37.9951997351435 50.3519150282938  
39.6474008369935 47.27543600687 38.4187686307607 39.9899430628542  
42.0424641526302

KLHDC8A 39.1590964332473 38.7344853699576 28.3262844159644  
31.7207795618545 31.098971689775 37.3799542961839 35.1307934330047  
36.8400213077707 38.9006788676407 33.2987269789328 36.3390947880186  
36.6603338274678

KLHDC8B 258.30549459038 101.759714275976 246.500690127803  
307.329227013816 613.914396149629 448.383843915421 521.874349042344  
135.11808699414 136.843285454801 492.13077103258 404.524605612471  
335.569876624791

KLHDC9 42.0532901689036 81.528980339501 136.236041346288  
42.357910063876 82.3181867658154 83.2083460752986 111.924999671217  
54.7911541269672 340.105993325165 111.669813610213 105.5039254445543  
100.774098314706

KLHL1 42.9104454767916 39.3999056968598 43.8495248991589 43.9282059368202  
41.5668884168669 40.040778349137 39.1539892144371 41.0381860307445  
47.7086093893038 43.7303813515864 41.4508241771315 43.3744503319109

KLHL10 36.6480005877129 32.7800533388945 44.0451487108213  
39.6292788039793 46.0977687311222 44.8872784170036 38.7337086062875

37.6557714476853 40.5912213523345 39.3698811593364 37.7384958256497  
37.9607839934735  
KLHL11 45.7356815244513 45.3036821110221 41.6550823405646  
41.3027031037343 48.1473938886239 41.9543948167375 43.0269218496197  
47.3791873993182 43.2163597439147 41.1222709786153 45.0589947942306  
39.8497227447888  
KLHL12 173.476817564711 135.138667957956 203.729732499418  
136.04447103201 149.792346524401 150.405742308999 150.737482160358  
139.554519110944 143.822560762049 156.096296406009 159.095553026723  
173.035987237848  
KLHL13 46.0023068797812 42.2900457798748 52.3432130135266  
39.3455642782085 41.4397539024976 68.7780894982816 36.5729485312886  
42.9301944191913 47.0804681460898 69.1623287497421 60.2165699959135  
55.3563533836982  
KLHL14 41.0970259989281 41.554942319225 38.35720098134  
46.0228732507872 37.10170285405 39.7697110924474 41.9393838138203  
42.4580504587581 40.4220196471124 39.3999056968598 40.8681871019812  
40.5703581862752  
KLHL15 43.2724556187214 40.8880530359822 41.528370959196  
58.5406981871153 36.7356360093603 43.2805590023412 51.0013344286851  
47.2009420656854 41.7627910693483 43.4885245598939 35.6041926503637  
40.8681871019812  
KLHL17 59.046385957117 61.0144918827511 45.5574745588721  
53.4785152499923 64.1080166181228 46.5387044784895 56.393737074538  
63.5295088521896 48.0163377492228 53.3059058105836 53.9918882088235  
52.9609836781499  
KLHL18 61.2130609867477 65.6721629145797 54.4384603094793  
56.6458456890715 81.4621222177298 61.4944752562671 58.8993834673475  
62.4219686957673 71.0820747228972 77.1767494799711 66.5063354430003  
67.6138276415458  
KLHL2 57.0006212637829 49.83247261979 58.5212649095879 116.295564219236  
54.1225249245036 49.1013967533186 48.4859552186772 48.1591264215184  
58.4200819624972 65.429256309049 68.0414563597154 82.0124493733776  
KLHL20 81.0295607064541 96.1710806345503 120.401643722713  
79.7937658787441 103.080153415433 153.626578526803 90.1500004950245  
58.8022152133979 68.3157692917711 78.5141640924736 99.8323169037315  
93.6260859565297  
KLHL21 67.3816715975056 76.3583555666815 64.9072331703985  
106.8866235778 122.531570028682 143.478533731355 60.7992483126292  
77.2048580540589 60.7942162859036 122.23209417744 116.304054038726  
103.955842514553  
KLHL22 310.821299796803 136.517445122438 124.032371632524  
175.936150174315 183.165559564289 239.117228656704 313.763121699885  
203.946427426126 161.7095047889 215.15351875081 238.510952165358  
136.355036262681  
KLHL23 45.3872406432794 56.3560498705517 50.6004078448405  
43.1847628331565 69.6330393135101 69.4214927857472 51.1541843174981  
39.853866204927 40.3316153483289 48.9826868640753 46.2560238004757  
53.4735821194294  
KLHL24 211.596652798395 227.059460958349 153.028210322286  
187.802182308625 203.82788889213 174.933650466403 328.46798329618  
230.787791652978 242.899629257173 357.668448180268 253.398345052444  
319.248898194029

KLHL25 43.7585538437696 46.3635803515159 37.1643693306382  
39.2780515621926 42.0709558258414 40.3357777530419 56.4809146784765  
55.6904617926772 48.3954967265007 51.4454142248566 58.9676332048764  
47.9566297250148

KLHL26 59.1311136551108 48.3699741879723 56.2441895183416  
56.4578213622965 86.4195039096886 64.3383155834968 46.0228732507872  
41.7419877611072 60.0736861987141 60.6266092582071 65.342842101283  
59.5080588072694

KLHL28 96.3232257371077 82.0897118579449 74.2769881586739  
111.071209057746 59.3611824459962 89.8567957512307 60.6548851977964  
170.172720177618 81.066448172567 131.380698046552 148.514056973195  
129.675613712326

KLHL3 96.4971762611189 158.806855832703 188.900125060451 134.725028732282  
120.046457114882 109.607667469015 70.3935694362568 126.882948837851  
157.7623351008 222.453547273598 136.377736482671 168.407377937447

KLHL30 45.3872406432794 42.1607322031054 43.1931731665131  
42.0102671859606 38.3561682218911 40.7616966228404 37.1643693306382  
42.2577689927563 41.9635525160083 46.1390887492649 42.8263096141654  
43.5738557773903

KLHL31 39.7576136507593 37.2810767789306 43.401782064778  
38.8495095797881 38.745552403895 37.3799542961839 33.5578650644246  
34.1806289878747 37.7384958256497 34.3674468322242 31.6063174764616  
38.9496515344837

KLHL32 39.6609238036815 42.3550738181144 41.785676764591  
42.4580504587581 39.3667161654772 43.0860383229288 43.5627649099623  
37.6557714476853 39.7537274655115 39.8873706855774 34.3633615460307  
41.3481355128089

KLHL34 45.0985088502363 41.4508241771315 44.9758339877851  
36.3604951341921 39.7568367479301 35.4142595025086 35.6056062164318  
36.0306975524309 42.2577689927563 40.6022003765153 43.844855336215  
35.9604262434141

KLHL35 74.3135387703106 55.0009147092272 91.0443726041992  
66.224559122062 60.1730663840476 67.8208976798364 68.0157730844432  
78.6911549149983 64.830448408529 59.1496467460507 60.6505672212119  
58.9069025298754

KLHL36 162.569762535436 204.370291548631 235.925374041038  
155.287591646469 217.189489936251 113.090530993447 202.795613942391  
113.064858029749 215.15351875081 99.8699868526053 104.398842509776  
125.92333271598

KLHL4 40.8091178323174 37.2103401831788 37.5597671487621 37.4223289687135  
37.0526522140242 47.0940613507321 39.1539892144371 38.4128104869434  
37.4937394063612 39.6251842352088 40.9683275553869 43.1235886043549

KLHL5 188.272588632909 113.388372364837 124.777882272835 334.527003257901  
209.363955566338 321.686871145301 112.60230393988 140.465247047676  
125.735441231594 152.545682001987 170.999578495858 254.639522735592

KLHL6 51.5888395924843 61.2108152457954 53.3127618245672 166.752205770965  
42.6022652963326 45.3882138838137 40.4359177791566 46.9986083378817  
42.9020321355927 51.0055825931636 48.2050207071554 47.7962548556026

KLHL7 63.7066330986416 58.174555206394 62.2685634967698 62.8201270538435  
64.2848885182563 73.4208306290635 64.7023558190673 64.1777305915695  
65.6003544901554 61.3005673792118 57.3697604614404 66.4229480716045

KLHL8 173.603999265239 191.6998930948 192.43245357593 250.993396750789  
257.993462737264 212.219384864571 174.252441615373 288.816567137193  
212.353676518748 338.586852166449 297.950627905767 213.204385896543

|        |                  |                  |                  |                  |
|--------|------------------|------------------|------------------|------------------|
| KLHL9  | 225.088911324737 | 213.140641182603 | 122.924027019519 | 165.820230766206 |
|        | 135.737771384104 | 281.906398109158 | 208.189151365575 | 126.360723656793 |
|        | 165.662539866309 | 226.262409390222 | 236.139267415604 | 255.598083334598 |
| KLK1   | 38.304249186058  | 41.2598458726002 | 39.3709357615493 | 41.4273122914951 |
|        | 43.5544347011646 | 56.9320717885002 | 46.3057385979341 | 49.085741080241  |
|        | 45.9227107476843 | 56.1912096308988 | 46.4753015651202 | 52.0359304386476 |
| KLK10  | 48.6621527194963 | 41.3277288245157 | 42.8270038153139 | 40.3180310664156 |
|        | 47.8075998240396 | 43.0177448037924 | 44.2733573199954 | 42.157627240486  |
|        | 46.6491671626143 | 43.7303813515864 | 43.6919270353542 | 39.8497227447888 |
| KLK11  | 78.328947112997  | 46.9578963946094 | 44.2733573199954 | 46.1074305700679 |
|        | 41.2424637338424 | 46.3203995372658 | 47.2927436772465 | 88.8039637390786 |
|        | 48.2768592317085 | 46.1390887492649 | 57.8991270166934 | 43.6434576713809 |
| KLK12  | 45.7356815244513 | 42.5269793679335 | 40.6312687664188 | 36.4098694708483 |
|        | 40.5710637884029 | 38.8336427948187 | 37.5469247328848 | 39.5083491499018 |
|        | 43.6670755115848 | 41.6724739851995 | 37.2018803984555 | 36.7762265039864 |
| KLK13  | 71.5484567134601 | 34.8137085420423 | 29.4322896559759 | 38.5252456306656 |
|        | 37.5556299264699 | 41.9543948167375 | 37.4772922422734 | 38.745552403895  |
|        | 40.7847110517594 | 32.9981302187884 | 33.2774014136617 | 35.2448979801094 |
| KLK14  | 42.5193208629123 | 40.3384318592985 | 44.0451487108213 | 40.5484717678957 |
|        | 45.3675390992851 | 42.0574848021044 | 40.7910160811527 | 43.1567024035183 |
|        | 36.0741672064298 | 36.5806287103157 | 40.723990462047  | 37.5556299264699 |
| KLK15  | 37.3952038370286 | 39.6123051184545 | 36.4098694708483 | 39.6609238036815 |
|        | 39.4092846492473 | 39.9871741554388 | 38.4428081526233 | 36.075550657169  |
|        | 40.2274522635576 | 38.528621456378  | 42.6366765186182 | 42.6208563330129 |
| KLK2   | 41.3387790895716 | 42.2114134935898 | 43.8153459269057 | 42.281606728072  |
|        | 37.5556299264699 | 44.3648993568405 | 39.3585350448719 | 41.7419877611072 |
|        | 44.7771939752086 | 39.1832968442811 | 46.5952288260503 | 42.7782216342806 |
| KLK3   | 42.5193208629123 | 38.2263227947189 | 40.5289532121417 | 39.853175885492  |
|        | 40.4098450813524 | 38.3956445058349 | 37.9430145836712 | 38.7981173437121 |
|        | 36.7657614042911 | 38.6454098044474 | 37.1617810121175 | 39.4888702378044 |
| KLK4   | 81.2359429678503 | 36.6968906669565 | 39.7411455670172 | 40.3180310664156 |
|        | 30.1388203764747 | 37.0180934800573 | 43.9450023643394 | 55.9303347977781 |
|        | 37.9273653326866 | 38.4187686307607 | 36.131485826118  | 35.5523662009011 |
| KLK5   | 55.7246872330059 | 40.3384318592985 | 41.2365089689635 | 46.614092935749  |
|        | 42.9090346219023 | 41.7196307387855 | 41.294200401933  | 39.0102066700839 |
|        | 41.4636047919453 | 42.7211272990786 | 40.3248602167143 | 34.3409660445447 |
| KLK6   | 156.382146982116 | 40.148780650831  | 37.0187570354067 | 72.9752827496503 |
|        | 41.9842695818285 | 40.7616966228404 | 39.5496902678788 | 44.293922970134  |
|        | 38.8495095797881 | 40.6533975461148 | 41.0050831223107 | 39.9941474864076 |
| KLK7   | 45.9090659324223 | 48.9259041798949 | 44.6032218589199 | 59.8102324370568 |
|        | 45.1899271235974 | 44.7044140979108 | 36.4564050256915 | 46.0633179231318 |
|        | 44.5678064264717 | 45.3530683538086 | 46.5650556481721 | 48.0350549043063 |
| KLK8   | 46.0398513158469 | 44.5544727111028 | 43.3465699185405 | 42.1273928203021 |
|        | 39.6535880152834 | 38.7340969861754 | 41.5817737564592 | 43.7731874801003 |
|        | 40.5912213523345 | 40.5090849993014 | 39.153226699662  | 40.7704587752083 |
| KLK9   | 33.9561816279577 | 37.10170285405   | 44.0451487108213 | 38.0958223740111 |
|        | 38.5512429290626 | 41.4508241771315 | 40.2154497375715 | 43.844855336215  |
|        | 38.0213051227859 | 46.8954576545929 | 38.3684202018524 | 41.9430737035925 |
| KLKB1  | 36.2496364442264 | 36.6002100641539 | 36.8730514568925 | 35.0448343468967 |
|        | 34.4570158133896 | 44.3648993568405 | 38.1793598983615 | 37.0390589468421 |
|        | 35.860430241131  | 45.9004543328976 | 41.9908237694988 | 33.6902293666089 |
| KLKBL4 | 37.3463875295726 | 38.9338521051669 | 40.1985790927248 |                  |
|        | 38.745552403895  | 42.1650127805175 | 37.5887129572848 | 42.0605906240248 |

|       |                  |                  |                  |                  |
|-------|------------------|------------------|------------------|------------------|
|       | 34.6977013306396 | 37.5469247328848 | 41.0057887014368 | 32.2133093774284 |
|       | 41.1554481567603 |                  |                  |                  |
| KLKP1 | 37.8386378737561 | 39.0894172982439 | 39.7411455670172 | 43.1847628331565 |
|       | 36.08956004634   | 37.1317006162938 | 42.357910063876  | 41.8417024632349 |
|       | 40.6957787921451 | 39.3698811593364 | 41.9908237694988 | 38.6454098044474 |
| KLRA1 | 40.0557788909923 | 47.5647821785529 | 48.8941062980393 | 46.8954576545929 |
|       | 42.4864576619427 | 42.4580504587581 | 38.2933870238743 | 42.357910063876  |
|       | 55.5086026637973 | 45.6868589181768 | 38.8507804383261 | 47.1060577218993 |
| KLRB1 | 89.4747568145717 | 91.640286556353  | 146.543232229227 | 567.534792333871 |
|       | 44.9936360641969 | 75.4227827818591 | 73.0433648756396 | 78.0020909283414 |
|       | 46.581796165231  | 101.197890058764 | 96.4278951689874 | 94.8717345601966 |
| KLRC1 | 40.9558083259517 | 42.8142224866049 | 41.7442113152211 | 41.7217466249678 |
|       | 41.2740822675592 | 40.800866389165  | 42.2577689927563 | 42.4864576619427 |
|       | 41.3481355128089 | 42.1414432370095 | 41.9083581529276 | 45.1735152121056 |
| KLRC2 | 35.290191727027  | 38.2263227947189 | 39.0775870687758 | 37.7146582037126 |
|       | 37.0105110201759 | 38.4330755397458 | 45.0283997415478 | 35.9489900178061 |
|       | 37.2810767789306 | 39.9519547348106 | 43.9450023643394 | 39.7844133452634 |
| KLRC3 | 41.0136069709699 | 43.4031723677362 | 41.1678908661272 | 42.8878262561526 |
|       | 41.7929491793697 | 40.9967936671247 | 40.6130792100165 | 38.4085832916721 |
|       | 41.4417765092034 | 39.6333888530279 | 42.911855821602  | 40.5703581862752 |
| KLRC4 | 32.6285977114039 | 41.159706131351  | 43.9450023643394 | 48.9944486068347 |
|       | 40.4639532172338 | 38.8336427948187 | 41.3594868055879 | 46.1673159982664 |
|       | 42.5406888281114 | 45.5776159432079 | 42.6366765186182 | 43.3744503319109 |
| KLRD1 | 45.6989664108554 | 43.2028319630577 | 49.7350276169552 | 60.0981687048269 |
|       | 37.292108575069  | 44.6524308640784 | 40.3850714987723 | 44.0687697278114 |
|       | 41.809704036355  | 46.1756277225778 | 47.6125796208753 | 45.0035308952466 |
| KLRF1 | 37.6817357354748 | 43.0227387991135 | 62.2200723764909 | 43.074472921841  |
|       | 43.9994592139885 | 42.6211340086915 | 39.7576136507593 | 40.931294690669  |
|       | 127.232160404726 | 43.5652644712197 | 48.2910530887214 | 41.1554481567603 |
| KLRG1 | 42.8539910132415 | 45.8284004440739 | 49.33855351691   | 84.2013403597582 |
|       | 42.7982502551634 | 61.8187341713197 | 54.6414321010929 | 42.8482181313226 |
|       | 43.3262148375525 | 45.4882438975269 | 46.4753015651202 | 47.2862299990938 |
| KLRG2 | 49.4151347850687 | 51.119812302881  | 48.4890615340603 | 49.5424425850549 |
|       | 62.588825192561  | 55.401776072578  | 62.6885730386156 | 51.1694248620208 |
|       | 65.9254098858352 | 54.6089451252049 | 56.6884575165011 | 55.2449003905956 |
| KLRK1 | 43.3638918705225 | 40.8880530359822 | 42.2577689927563 | 39.9697332660833 |
|       | 40.7779767565889 | 49.3172204533818 | 44.7255207589606 | 44.7044140979108 |
|       | 44.8003345643334 | 46.5650556481721 | 42.5426057453993 | 48.3648494350286 |
| KMO   | 42.2455707947223 | 41.159706131351  | 37.1643693306382 | 62.3936376596431 |
|       | 46.8674366115656 | 40.040778349137  | 37.9430145836712 | 42.4580504587581 |
|       | 33.2715481910159 | 42.3606390470387 | 34.174642681781  | 38.745552403895  |
| KNDC1 | 45.8669209716694 | 40.1073950092563 | 43.0971787292711 | 41.1886975241176 |
|       | 39.4693871570028 | 45.5772632530809 | 39.1878770155069 | 39.853866204927  |
|       | 39.9871741554388 | 41.3321861371202 | 42.589641010388  | 41.1138630151981 |
| KNG1  | 39.7576136507593 | 46.4861258030402 | 40.931294690669  | 42.0102671859606 |
|       | 47.2074332636566 | 38.9378717994178 | 39.0458123429605 | 42.357910063876  |
|       | 44.0519245668737 | 44.8997235283254 | 37.5583886316038 | 48.3648494350286 |
| KNTC1 | 198.754967214875 | 163.16724817696  | 168.522052983892 | 172.720244584464 |
|       | 175.136856246782 | 78.0586153423713 | 292.389429869034 | 140.559370165331 |
|       | 200.566335168667 | 91.6713614282714 | 74.8473087205709 | 116.007007037602 |
| KPNA1 | 149.832238573027 | 114.617965877564 | 150.801729138762 | 162.932479392087 |
|       | 189.137593177772 | 111.240804216088 | 110.837476359817 | 162.513675180449 |
|       | 120.26537515666  | 116.311176407088 | 109.503117647487 | 134.869029698594 |

|         |                  |                  |                  |                  |
|---------|------------------|------------------|------------------|------------------|
| KPNA2   | 71.2246788429078 | 81.0057400164851 | 60.7530213660442 | 49.260242314197  |
|         | 121.945468001236 | 57.6034762511847 | 110.223625398261 | 73.1045688753569 |
|         | 128.391264770998 | 44.1379638573455 | 46.2560238004757 | 52.1186591838715 |
| KPNA3   | 91.31756001203   | 97.8764110456132 | 84.5998418020787 | 115.468303687641 |
|         | 92.3034609409756 | 121.744701580607 | 89.7242042805798 | 77.6174893940285 |
|         | 114.404099081799 | 99.3142021810133 | 104.715234047628 | 131.717764850211 |
| KPNA4   | 449.059703234741 | 295.856741468603 | 280.563427715895 | 464.025908364057 |
|         | 563.927521628693 | 694.590958116425 | 382.744696166534 | 525.35784336478  |
|         | 312.795596385258 | 612.843402058384 | 524.047008889711 | 621.489785652602 |
| KPNA5   | 47.7267190613906 | 42.6939394537076 | 42.8270038153139 | 44.550322123994  |
|         | 40.0599807618105 | 45.9266745571724 | 44.3440839686558 | 41.2551966132486 |
|         | 43.7630587657205 | 46.441301934328  | 46.1673159982664 | 47.7962548556026 |
| KPNA6   | 386.934057829091 | 360.668308246913 | 444.858305070415 | 290.81245174957  |
|         | 525.687522832693 | 421.013324906569 | 372.642038290698 | 774.8306350567   |
|         | 444.937258895152 | 717.997180920384 | 739.541009338849 | 469.30167430316  |
| KPNB1   | 1411.12613289991 | 1236.32289322872 | 1163.0370991733  | 1163.0370991733  |
|         | 1413.36279821142 | 1327.93833415582 | 1704.0522304387  | 1261.91478863258 |
|         | 1783.87583818834 | 775.515071756239 | 1040.97380790412 | 878.863554510943 |
| KPRP    | 37.4554876386402 | 46.0023068797812 | 49.6347864008749 | 40.7481155008596 |
|         | 40.4639532172338 | 40.650742261428  | 38.4005795891396 | 40.2382908228517 |
|         | 40.4997186069494 | 41.2276963324981 | 32.406093465115  | 41.3481355128089 |
| KPTN    | 45.2875173643252 | 43.896638326678  | 45.0985088502363 | 39.1706564265495 |
|         | 42.8510579683751 | 45.9980734733005 | 40.369768755239  | 44.4031868028216 |
|         | 50.0802438185974 | 43.4885245598939 | 48.042366934301  | 44.0451487108213 |
| KRAS    | 86.4937293696262 | 77.6174893940285 | 80.7338782543351 | 95.3070802596041 |
|         | 62.3862792065884 | 88.6287852712744 | 98.1371527802953 | 73.1045688753569 |
|         | 122.203872796773 | 66.8693882433359 | 69.5544840164738 | 74.7794253940974 |
| KRBA2   | 47.9175508887533 | 66.3904351698776 | 60.8357760968871 | 56.0794100106654 |
|         | 51.4527545197672 | 51.294537308199  | 54.0170817319522 | 47.5950227477807 |
|         | 40.137818555383  | 95.5156363110528 | 93.7977486287985 | 76.1453055441256 |
| KRCC1   | 92.3034609409756 | 72.2016884438365 | 86.0761288363404 | 95.4393274079354 |
|         | 57.8039717833131 | 119.947688643528 | 70.1184116246724 | 108.025082988807 |
|         | 76.5699943825825 | 83.7215159198897 | 88.1614325571117 | 108.649424858333 |
| KREMEN1 | 47.4964755141472 | 61.5236837309467 | 65.3531590366085 |                  |
|         | 55.7418331108915 | 49.6733735285073 | 53.4921736109774 | 59.7629007954215 |
|         | 46.3685439301234 | 58.2941346100716 | 50.1314528043038 | 51.4413099192899 |
|         | 54.8360406467395 |                  |                  |                  |
| KREMEN2 | 54.2931724501801 | 47.664340982223  | 43.4558010540988 |                  |
|         | 45.0798408927912 | 50.977432027367  | 48.303052868477  | 49.6872467499977 |
|         | 44.081163104701  | 45.3756389170606 | 40.6573239942138 | 39.3667161654772 |
|         | 40.8254641406268 |                  |                  |                  |
| KRI1    | 55.9249770393176 | 57.0875538213735 | 55.9459886217809 | 46.7577982595088 |
|         | 73.2607982527105 | 48.260931742163  | 56.0515443021293 | 55.5578334877425 |
|         | 60.164635768614  | 54.7827221235949 | 52.7817052791259 | 54.1090536870282 |
| KRIT1   | 66.5500089527674 | 84.1224653052549 | 106.679905803492 | 74.4851052263387 |
|         | 84.0305689846475 | 102.430234282331 | 87.539553421006  | 68.580705761277  |
|         | 95.5530572805104 | 68.1209771323232 | 69.7215372275927 | 82.6602736441839 |
| KRR1    | 58.2902084992082 | 88.9321928608078 | 66.4079972657486 | 61.7502624458447 |
|         | 70.7760293129408 | 92.9820860411485 | 69.1414574152997 | 56.3560498705517 |
|         | 75.2337946941103 | 50.0564735608363 | 53.4088637045445 | 68.0751111916102 |
| KRT1    | 43.6706764143908 | 52.3187919317561 | 39.0775870687758 | 44.6905691366696 |
|         | 40.4639532172338 | 65.3096524773304 | 42.8684958525042 | 45.2806199505029 |
|         | 39.2809305246091 | 46.7646877499666 | 40.4504608195666 | 37.1747156131306 |

KRT10 443.863346367342 647.297964303385 593.801086643125 287.247399926139  
 811.142611128461 486.487366153374 965.530928317269 378.626656077546  
 932.849256536912 352.47015903013 581.093069802913 568.638529128128  
 KRT12 41.5421429082231 44.1239711172417 78.1683130800805 41.6564075217517  
 44.2607789091176 37.2686490268265 46.5650556481721 65.3019328668633  
 45.1899271235974 39.6719190054379 40.6373400186325 42.6758568421347  
 KRT126P 44.9370339275041 44.9863726205428 45.310660704531  
 42.281606728072 47.4548471240051 45.2852528185486 43.4544762830742  
 46.6384636367629 44.6717213146407 44.6918600441328 45.9938357766653  
 42.6278608611758  
 KRT13 54.3554233228353 1018.35211991691 5733.54417656207 356.628599887098  
 7393.77508374057 1716.82239359769 506.173054520807 3634.98300564068  
 18219.5845257111 7681.71833395626 3190.0108307463 4058.32430616734  
 KRT14 42.8036731479932 164.511418506192 93.9472621843566 75.0377156190383  
 53.4109882045447 44.1737502492846 45.8980298854198 56.8094693588238  
 53.2046867327331 42.4594149893798 43.3085358214154 41.4508241771315  
 KRT15 53.8856501960117 237.974766880957 331.533249823589 38.0958223740111  
 55.4919197421746 45.2852528185486 52.0942589368478 90.0223113095186  
 452.797096652556 70.0907269565408 52.104880481326 70.8546350449171  
 KRT16 145.419126322238 87.8681250426295 147.424598105182 84.5411149237799  
 85.352285669007 47.4699236780425 65.2361525412756 121.37214545992  
 138.581471125405 55.1804535845496 47.1477056711335 62.8050945727712  
 KRT17 339.088535171641 1194.10154988793 2506.05102956991 411.114836576804  
 1634.61795848352 259.626847216881 987.427672417105 1436.67510926345  
 1792.42490815074 913.704049709264 447.348799009312 1149.90692951795  
 KRT18 51.413025495745 70.3213394542625 63.6334154351075 43.607701594929  
 62.7488501311848 42.5193208629123 76.0041771381018 75.0377156190383  
 96.2058974277481 43.9450023643394 43.5258090162298 48.9733758107788  
 KRT19 7627.46814033012 8630.67463560037 16661.6081002448 361.776841675393  
 7476.94487791412 1559.50766982801 7681.71833395626 3399.75820494572  
 14226.3743910711 4036.89580181979 4093.70002166179 3379.67054115975  
 KRT2 43.3638918705225 39.0894172982439 40.4882741869718 41.5464765641928  
 37.0526522140242 32.2133093774284 39.3585350448719 35.2642250366721  
 44.4395580493118 36.3612409063792 38.2795150354677 48.6795178347248  
 KRT20 82.5344501505114 327.631923082696 186.229678647062 42.0102671859606  
 115.048869605875 57.0775902639215 228.08291792003 423.989018031638  
 105.434580236651 44.7958122466628 58.9676332048764 39.9941474864076  
 KRT222P 41.6354649482853 40.716553247236 39.4710743516517  
 47.3574589211166 36.6354013629791 72.0674952635945 43.4544762830742  
 40.7311497914871 42.9020321355927 70.7805103907761 53.0177144132449  
 55.3563533836982  
 KRT23 69.6449298794042 51.340484930067 49.2041300973417 52.3004056941891  
 53.6907197364586 52.2089306840125 118.27400376579 54.6476581536041  
 75.2337946941103 59.6246428440926 52.5154971256566 52.3304586399695  
 KRT24 41.3387790895716 47.6229101519945 37.7384958256497 49.9014504704021  
 43.7517118200398 131.126942328593 36.7356360093603 44.1311654985682  
 47.798305839406 60.9905272201951 55.4694986901287 94.1128427766432  
 KRT25 41.0608773166058 37.10170285405 37.2838080935695 37.7469621225553  
 40.5710637884029 39.3841861812262 39.4600924554505 35.2642250366721  
 38.6322728994674 35.93950183586 34.174642681781 36.3454320848591  
 KRT26 41.2773842727759 40.0984333134909 38.5442780220289 54.1240583139871  
 39.3667161654772 38.3418933808844 41.5464765641928 45.063792968927  
 42.2577689927563 37.7598032934773 39.3086414047188 41.0226232127351



KRT27 39.6609238036815 37.6383530120621 34.3633615460307 38.8495095797881  
40.8873907150245 64.6835308827804 40.7910160811527 35.6825474397235  
40.4220196471124 36.5806287103157 44.2142581488029 36.1647506311964  
KRT28 36.1232327599945 41.7337506166619 43.9450023643394 38.745552403895  
43.4544762830742 38.5252456306656 34.0777108441756 41.8417024632349  
35.860430241131 39.2623423164488 38.2795150354677 40.6614700944853  
KRT3 44.5282181324797 44.2630383225933 43.7630587657205 48.9944486068347  
40.0599807618105 43.7630587657205 44.8643898647322 46.8954576545929  
41.4636047919453 43.401782064778 38.8507804383261 47.9566297250148  
KRT32 31.4517139158876 35.6434124419782 40.4070046183108 38.5252456306656  
34.806104801006 36.8059561571675 27.4352294118391 35.1738399826814  
36.7267557061938 38.1042454705119 34.4716904283753 37.5556299264699  
KRT33A 41.483412492426 42.9887069977696 44.696023817801  
39.853175885492 41.1507980856436 44.7044140979108 45.1694246393676  
43.6753843488695 47.6582396278888 42.785429206422 42.4580504587581  
42.1537476443423  
KRT33B 44.8914371498528 41.159706131351 50.3950981988762  
36.0481934423077 40.2449343247539 38.4330755397458 42.0605906240248  
42.6450179841129 39.5806465938526 41.5435611403119 33.5370783156523  
45.3763275588341  
KRT34 39.266565827316 39.2907645923217 33.9435456570176 37.0732977341185  
49.5666074434383 40.9506062495231 31.098971689775 38.745552403895  
39.7537274655115 44.2580151149956 39.5399188536544 40.8681871019812  
KRT36 43.3638918705225 40.0527893189096 43.401782064778 46.0228732507872  
40.8873907150245 39.4953494583071 41.0381860307445 46.5717043290731  
46.581796165231 45.1569741609597 42.8263096141654 40.8681871019812  
KRT37 35.6111578834671 35.4484652445078 40.4070046183108 40.9607305725196  
41.2740822675592 37.2686490268265 41.253645578517 34.6977013306396  
37.0126425326534 36.0481934423077 39.5399188536544 37.3600014814388  
KRT38 44.6231541342 38.4330755397458 44.2405728317107 39.7411455670172  
38.1644569189523 38.9378717994178 42.4939802311136 40.6171774724171  
36.197424053556 41.7405682794166 36.131485826118 37.1747156131306  
KRT39 41.678190413467 37.3179578037963 40.0998167098057 42.6222445667107  
40.9416717019827 40.2945586900975 41.253645578517 44.4031868028216  
43.4656637536244 43.6033221838149 43.1931731665131 38.6454098044474  
KRT4 49.2595762436995 48.275452803061 71.3527183280827 44.0451487108213  
51.7983110178095 33.2552842693684 39.8695929627783 202.360546931172  
65.3672880026114 40.4136535208406 39.6403089864678 34.806104801006  
KRT40 30.493888765264 34.0382693188794 36.3604951341921 42.0102671859606  
37.5556299264699 30.493888765264 31.6981395162348 42.5435283762933  
38.7298222155532 35.3849221682845 35.6041926503637 42.357910063876  
KRT5 40.3478825593224 127.043177339038 561.2769907009 93.4853597306163  
54.3116862772198 42.0574848021044 42.2577689927563 164.96500173066  
757.545320379227 164.917385239962 53.8856501960117 57.1441484662045  
KRT6A 368.972794063004 379.79657860938 947.656220635965 729.342532316666  
56.9360840563854 48.5835484742456 47.7390230243778 661.269882993465  
310.188313944313 48.7414853386615 43.5710871617107 42.6758568421347  
KRT6B 50.1833483241864 44.8969632710144 46.0241950824438 57.8277957325085  
42.352235481637 40.4359177791566 43.4870236357993 49.6203214143464  
45.0755084221375 42.5153507543837 42.4238335236362 37.0390589468421  
KRT6C 71.6849360818041 65.3694267397114 149.515611848932 39.1706564265495  
44.7829632472754 37.9951997351435 45.3597029614942 144.324036829708  
56.9320717885002 39.4710743516517 43.5710871617107 38.9496515344837

|       |                  |                  |                  |                  |
|-------|------------------|------------------|------------------|------------------|
| KRT7  | 428.105433953405 | 2184.70038900784 | 5525.13078364599 | 194.395766807005 |
|       | 2712.36664370642 | 401.679080975109 | 3884.2191293028  | 3166.48568397766 |
|       | 5696.39636379286 | 2071.90741263566 | 1539.35554229258 | 1263.76838179117 |
| KRT71 | 41.4508241771315 | 40.5400384479766 | 35.7105247506212 | 37.651298468202  |
|       | 43.2484996523549 | 44.1737502492846 | 43.0930293831497 | 40.931294690669  |
|       | 43.0930293831497 | 44.2580151149956 | 37.6484782516569 | 36.7762265039864 |
| KRT72 | 39.1590964332473 | 44.6918600441328 | 46.2625470410195 | 39.7411455670172 |
|       | 45.4751076037511 | 42.157627240486  | 40.6750540874299 | 42.4580504587581 |
|       | 47.27543600687   | 41.7405682794166 | 45.0589947942306 | 46.5650556481721 |
| KRT73 | 41.9407041937973 | 48.7084357480922 | 40.0998167098057 | 44.7980740332174 |
|       | 46.1804647841331 | 42.357910063876  | 44.4639405506967 | 37.33030683349   |
|       | 37.1820543575123 | 44.571915452417  | 37.1059647239814 | 43.6753843488695 |
| KRT74 | 39.3709357615493 | 37.10170285405   | 31.6419446793642 | 38.8495095797881 |
|       | 32.2133093774284 | 36.9060997041453 | 38.941855825269  | 38.3684202018524 |
|       | 39.9444191873552 | 40.7063426028871 | 38.8507804383261 | 31.1733235029813 |
| KRT75 | 45.5758521267508 | 38.6414316877471 | 40.7620472083159 | 44.4367387274922 |
|       | 45.1137938810047 | 37.3799542961839 | 37.2892641289258 | 38.1835938174625 |
|       | 41.074824727477  | 37.3179578037963 | 38.8507804383261 | 43.7672102682067 |
| KRT76 | 39.6609238036815 | 44.1239711172417 | 41.2365089689635 | 41.5464765641928 |
|       | 39.859345745831  | 39.3841861812262 | 39.2533668167483 | 37.5511560880902 |
|       | 41.1742244762318 | 41.9666541498638 | 41.0050831223107 | 38.5279745308203 |
| KRT77 | 41.7397731376692 | 45.1694246393676 | 72.7987593815919 | 44.6905691366696 |
|       | 37.8679241954337 | 38.1169703906207 | 39.2533668167483 | 42.6450179841129 |
|       | 44.5303781239209 | 34.9138625012006 | 40.9157352260901 | 38.3291713594599 |
| KRT78 | 37.7384958256497 | 37.4540772310118 | 41.2365089689635 | 41.8778873678551 |
|       | 37.5556299264699 | 37.2686490268265 | 44.9863726205428 | 39.4710743516517 |
|       | 43.9450023643394 | 39.8873706855774 | 40.8225507267584 | 47.3992733452821 |
| KRT79 | 42.442231667357  | 41.159706131351  | 38.2280071951674 | 46.1673159982664 |
|       | 43.3332476888305 | 46.6872654833579 | 43.8206425661746 | 43.3262148375525 |
|       | 40.6957787921451 | 39.9948390976317 | 43.3085358214154 | 37.4554876386402 |
| KRT8  | 2225.65559724391 | 1413.36279821142 | 1416.47763911039 | 96.2385885003071 |
|       | 564.929183025034 | 197.569816397993 | 1202.11455437028 | 2474.22199172028 |
|       | 1465.08435775014 | 648.380417557148 | 954.116675685628 | 367.931222555457 |
| KRT80 | 98.2280780221631 | 105.739423435604 | 46.5650556481721 | 43.9744941494111 |
|       | 74.6833250738044 | 43.3785777889265 | 105.166073980781 | 145.335751135441 |
|       | 125.835967514239 | 57.2231446406982 | 85.1603116461516 | 87.4623442823265 |
| KRT81 | 38.5648843914189 | 51.119812302881  | 36.178547300352  | 42.9358255168086 |
|       | 33.7494761745342 | 40.4359177791566 | 38.2933870238743 | 41.9315419791594 |
|       | 40.9901805728485 | 42.9866214102525 | 42.911855821602  | 38.4330755397458 |
| KRT82 | 44.6231541342    | 36.2103905554984 | 40.5734458834617 | 39.2780515621926 |
|       | 41.2740822675592 | 38.4330755397458 | 49.540449125788  | 37.1317006162938 |
|       | 39.5806465938526 | 41.3321861371202 | 39.8184668132023 | 38.745552403895  |
| KRT83 | 37.2474303302343 | 41.8848959280916 | 47.9035532886869 | 40.646702696033  |
|       | 44.5668141895992 | 47.7556758818053 | 56.2181240696479 | 43.9366081640576 |
|       | 40.2274522635576 | 49.4006068471301 | 46.972521499515  | 41.863927676552  |
| KRT84 | 42.9104454767916 | 36.1232327599945 | 40.4882741869718 | 47.8164193292842 |
|       | 43.1252272136667 | 37.8102105794655 | 35.3362091871364 | 39.2672712041774 |
|       | 39.853866204927  | 36.2435874904689 | 38.4689132737495 | 39.9519547348106 |
| KRT85 | 36.3649677956953 | 40.148780650831  | 41.437237454134  | 41.8778873678551 |
|       | 40.148780650831  | 42.4580504587581 | 46.8613212048981 | 38.1835938174625 |
|       | 34.8552366193358 | 41.9666541498638 | 42.911855821602  | 39.9519547348106 |
| KRT86 | 68.4352167527791 | 64.408176016319  | 60.6567691532561 | 51.0175677516029 |
|       | 50.5110359971301 | 41.4508241771315 | 68.878562323012  | 103.631449539809 |
|       | 53.3932110698117 | 65.429256309049  | 87.4273245333478 | 65.3585701203568 |

KRT9 59.987045425047 51.2405397507224 46.9040704638073 63.1604223919703  
50.8875036861067 49.5424425850549 59.0457625163577 68.2309359831273  
51.1055541075029 62.1035858593388 59.9682734755814 55.1804535845496  
KRTAP1-3 41.7397731376692 40.9731067463382 44.8872784170036  
39.1706564265495 41.5668884168669 39.8455060654531 36.4098694708483  
49.2901038327894 38.5252456306656 38.957687788868 43.0971787292711  
38.745552403895  
KRTAP1-5 45.3872406432794 43.0971787292711 45.6989664108554  
45.334106390212 41.3755760434934 41.159706131351 39.6535880152834  
47.7889447429963 47.7086093893038 44.6918600441328 39.6403089864678  
38.2350720635382  
KRTAP10-1 42.442231667357 37.1685072112618 42.5406888281114  
39.1706564265495 40.3452320167286 39.0266821712099 42.357910063876  
39.5466975353131 40.8970401536578 36.3612409063792 39.153226699662  
41.3481355128089  
KRTAP10-10 42.8482181313226 42.985929467107 44.6032218589199  
39.5558610526094 45.6355219961567 44.7058233759912 43.8664428040913  
42.6450179841129 43.5669306063196 47.0055981216687 44.1642484298135  
43.4390398501329  
KRTAP10-11 43.2724556187214 47.4740726032707 48.4890615340603  
42.5664883002833 39.6535880152834 49.7458652239071 42.4939802311136  
43.5544347011646 45.9227107476843 45.1569741609597 49.4593570700221  
44.6484005362281  
KRTAP10-12 39.0620487644635 35.3307157989724 35.7105247506212  
40.9607305725196 40.7779767565889 38.2293008890613 34.1889222434768  
38.2782436497441 35.5220586859301 36.1550293353654 36.3390947880186  
35.2448979801094  
KRTAP10-2 45.4507786740825 43.2649781354792 41.8751578329365  
39.7411455670172 40.6308525754377 38.385865183581 45.017247592678  
41.3012916486748 40.2739700860114 39.7411455670172 42.8263096141654  
39.1553169409075  
KRTAP10-3 41.9407041937973 38.6414316877471 36.0306975524309  
39.5050383901884 42.3685136297603 48.260931742163 46.3057385979341  
37.9837233601316 46.4164127487052 44.0409178714232 39.4410515050885  
38.9496515344837  
KRTAP10-4 34.2180669723984 40.6380495994768 43.1931731665131  
45.5869891570251 39.1650142708257 40.1428591998404 42.357910063876  
39.0620487644635 38.7298222155532 48.4890615340603 42.7275315121163  
37.2810767789306  
KRTAP10-5 32.2133093774284 36.3110701990588 34.0382693188794  
37.4223289687135 37.4470183315826 39.8455060654531 32.2133093774284  
35.7973685350741 26.6357008041456 40.8970401536578 39.7342718293432  
40.1700117452801  
KRTAP10-7 34.4896350146096 35.2143190355414 34.5718473203083  
37.5382094267692 35.5220586859301 39.9397419279057 37.0564573649223  
37.4484310268909 36.8127605061228 33.1559412791294 33.6080693875435  
38.4330755397458  
KRTAP10-8 40.5654775358427 44.4411734611229 37.1643693306382  
41.8778873678551 47.0954207417646 46.574682061365 46.9929836306816  
39.0620487644635 38.4344387289956 43.2988017098387 49.532546810992  
40.0557788909923  
KRTAP10-9 43.2135791259317 43.6587492470348 44.9758339877851  
43.7540438144592 43.6587492470348 44.5099734963815 45.4799270968969

45.223075311113 39.2497056720346 46.2768056702424 41.3553369544097  
44.2527566343661  
KRTAP11-1 38.8561375693335 44.4411734611229 42.9104454767916  
42.9358255168086 43.7517118200398 43.5752393599169 36.197424053556  
41.7419877611072 40.5912213523345 45.1569741609597 38.4689132737495  
43.5738557773903  
KRTAP12-1 43.0930293831497 46.4385386401326 43.4709415392696  
49.5424425850549 42.3685136297603 42.4580504587581 50.2016912396771  
47.5950227477807 44.0519245668737 43.401782064778 48.042366934301  
47.3992733452821  
KRTAP12-2 35.9305494063137 44.0409178714232 43.4709415392696  
44.0451487108213 51.2525124735102 36.2768299545794 39.0458123429605  
43.6434576713809 43.3744503319109 42.4594149893798 46.7386599624801  
41.6550823405646  
KRTAP12-3 38.1169703906207 42.2577689927563 39.5450079747895  
35.7674462337723 42.1650127805175 38.9378717994178 38.7337086062875  
39.1652965788406 41.074824727477 41.3321861371202 41.2598458726002  
41.9430737035925  
KRTAP12-4 37.2474303302343 38.3322849790657 37.9482157381008  
47.481302504066 41.467005949568 35.8227939208521 39.7576136507593  
39.2672712041774 45.3756389170606 40.4136535208406 40.1742127891824  
41.4508241771315  
KRTAP13-1 41.187562301961 46.5421017969405 42.7881985796277  
40.8084239472012 42.8510579683751 45.4607426241257 50.4260283682427  
44.8997235283254 46.7414272831181 42.233842834629 43.8002456102021  
42.1860813954352  
KRTAP13-2 38.5007204246293 42.1607322031054 44.2405728317107  
44.550322123994 44.9936360641969 37.5887129572848 37.3799542961839  
39.7509165247419 39.1790517315259 42.0621425894624 40.6373400186325  
38.3291713594599  
KRTAP13-3 40.3478825593224 40.0527893189096 42.157627240486  
41.0726336841311 44.4489662507893 45.2852528185486 41.706879587091  
43.1567024035183 46.0106098064475 39.3698811593364 36.9060997041453  
45.0035308952466  
KRTAP13-4 40.7609952437622 42.7775752471711 38.4043916290561  
35.8472302065546 41.1868052124344 48.1591264215184 40.9157352260901  
41.6466169548846 42.9020321355927 47.611018474151 43.7585538437696  
39.2469742642337  
KRTAP15-1 34.5886782974123 36.9994058279362 38.6005272730664  
40.646702696033 40.9950639693255 39.2248354955045 41.9393838138203  
30.2675713925613 36.8127605061228 36.0481934423077 36.3390947880186  
42.7782216342806  
KRTAP17-1 44.7915315085948 37.7384958256497 38.3166554965434  
42.357910063876 40.8873907150245 39.132725377815 35.6056062164318  
36.1375121409002 40.4220196471124 39.9948390976317 36.9060997041453  
39.7411455670172  
KRTAP19-1 35.2267149016596 40.7952353240579 35.5220586859301  
36.0481934423077 40.148780650831 39.9397419279057 37.6036146841933  
38.2782436497441 38.6322728994674 44.1379638573455 36.7283081422707  
38.4330755397458  
KRTAP19-2 43.1805016690297 41.0678614026819 37.9482157381008  
43.074472921841 37.4470183315826 32.2133093774284 44.4639405506967  
47.3791873993182 40.3316153483289 36.8059561571675 38.079222289614  
44.2527566343661

KRTAP19-3 35.8208542506595 39.6123051184545 47.0055981216687  
33.1817617228171 41.8806343997257 38.1169703906207 40.3302268293707  
36.5393857306744 42.992884918158 41.1222709786153 39.6403089864678  
35.2448979801094

KRTAP19-4 38.385865183581 40.7952353240579 38.4043916290561  
41.7614975630362 37.6527901109005 44.7804080899431 38.7337086062875  
39.9576138799997 40.8970401536578 42.5664883002833 41.8168470823451  
39.1553169409075

KRTAP19-5 36.5393857306744 38.5252456306656 35.2838283525874  
32.2212308728305 34.0927410219282 41.3553369544097 31.4474799869345  
33.5578650644246 37.9273653326866 38.1042454705119 32.1218888714537  
35.0222940937513

KRTAP19-6 51.1740855632044 53.0383634135393 53.9612654850046  
176.27162536342 48.0234896130991 56.6172748471831 51.3064929551674  
55.8087097725119 46.1101825640108 50.0564735608363 51.2318935933116  
55.9555622193202

KRTAP19-7 45.3872406432794 37.5469247328848 37.3687900733549  
39.853175885492 39.4693871570028 39.4953494583071 40.7910160811527  
42.9301944191913 38.7298222155532 37.5343260962758 42.2618615571566  
42.57175366709

KRTAP2-1 42.8539910132415 41.0226232127351 38.941855825269  
39.3455642782085 39.3999056968598 38.9378717994178 42.4939802311136  
37.86982638952 36.7604001262514 41.3641352453779 39.9070785037411  
45.6233434183356

KRTAP2-2 39.512606833112 40.3384318592985 39.3709357615493  
42.0621425894624 38.6213341190836 34.8956628705329 44.9863726205428  
37.33030683349 39.2809305246091 39.5637454855233 36.3810228376302  
37.3057614736707

KRTAP20-1 39.1590964332473 42.5269793679335 38.9790184198145  
40.9607305725196 39.5595233162192 37.7000400506818 36.08956004634  
44.5029690493211 49.3780606970538 41.7405682794166 39.0550139257658  
40.7704587752083

KRTAP20-2 38.8561375693335 44.0409178714232 49.2041300973417  
44.265834798964 43.2484996523549 37.2686490268265 39.2533668167483  
42.9301944191913 42.8036731479932 41.1222709786153 45.9104478407175  
45.2783024981315

KRTAP21-1 42.442231667357 44.1239711172417 44.3344900481112  
47.3574589211166 45.1137938810047 48.9826868640753 45.223075311113  
47.6952179922944 46.0106098064475 47.0055981216687 43.844855336215  
43.6753843488695

KRTAP21-2 46.7293238583888 36.3110701990588 41.9666541498638  
40.7481155008596 44.7829632472754 39.7394181011603 42.9803717121865  
46.695848687694 47.0804681460898 39.5637454855233 41.0808257270221  
53.2046867327331

KRTAP22-1 39.3709357615493 39.6995529770239 35.2101597814352  
36.3604951341921 43.1252272136667 40.4359177791566 39.7576136507593  
34.1806289878747 40.6957787921451 38.0078357808393 38.4689132737495  
36.9976231206067

KRTAP23-1 39.6609238036815 40.148780650831 41.437237454134  
48.1662933382789 46.4343327861696 38.3418933808844 42.9803717121865  
40.1474543172332 40.9901805728485 43.4885245598939 40.3452320167286  
37.4554876386402

KRTAP24-1 42.8036731479932 40.148780650831 43.4709415392696  
38.8495095797881 38.1644569189523 40.9506062495231 49.540449125788

40.1474543172332 46.2027193115397 42.6793753550854 43.0016969050339  
39.0536056496869  
KRTAP26-1 44.2350046179299 40.7952353240579 41.437237454134  
41.1886975241176 35.4484652445078 46.1513019317765 39.3585350448719  
46.3685439301234 44.4395580493118 39.8873706855774 44.6286581923295  
44.5432192783161  
KRTAP27-1 42.466333667839 42.6450179841129 43.7630587657205  
45.8102081251786 40.5235471987417 42.9104454767916 39.9559575274857  
43.0930293831497 42.357910063876 45.3530683538086 40.5824352835642  
39.5792604499113  
KRTAP3-1 36.6062356000449 42.0709558258414 40.6312687664188  
38.0540928703622 41.4397539024976 41.7627910693483 37.830876898596  
39.853866204927 40.1738310955128 39.528971131769 40.723990462047  
44.3521099857368  
KRTAP3-2 40.3180310664156 40.5400384479766 40.7952353240579  
40.5991006167568 42.9775348174342 41.8890826572422 41.1818632392526  
41.6825727187466 41.7117861328546 41.3321861371202 41.1367478979484  
41.809704036355  
KRTAP4-1 59.9232969481163 43.4396866157171 46.4569566520107  
40.9607305725196 57.5685357492202 38.5252456306656 55.2088411137193  
37.86982638952 45.3756389170606 41.9666541498638 41.7272875295469  
39.1553169409075  
KRTAP4-11 38.2083710281545 46.8236022402545 36.0306975524309  
35.6027791404152 39.3667161654772 41.6590564937735 44.4639405506967  
40.4359177791566 37.1820543575123 37.8217989841918 41.4508241771315  
38.9496515344837  
KRTAP4-12 43.2724556187214 41.2598458726002 45.5883690965192  
40.9607305725196 46.0043807840705 38.3418933808844 37.1643693306382  
36.3405039629059 41.9635525160083 41.1222709786153 40.8225507267584  
42.7782216342806  
KRTAP4-2 37.1485601150873 36.5219488315447 40.931294690669  
45.7397504535169 39.4693871570028 34.0045980663271 39.0458123429605  
38.8495095797881 37.0126425326534 40.8049408996274 39.2542963855807  
41.9430737035925  
KRTAP4-3 38.385865183581 40.6380495994768 36.8730514568925  
44.6905691366696 42.0709558258414 36.6271061451613 38.2933870238743  
45.8669209716694 38.2215591930186 40.6022003765153 45.310660704531  
38.6454098044474  
KRTAP4-4 41.7397731376692 41.4508241771315 40.6737160001291  
40.5484717678957 37.2567512265363 40.040778349137 41.8315602975157  
36.2539950294089 35.9645119596869 41.1222709786153 41.9083581529276  
44.0451487108213  
KRTAP4-5 40.9558083259517 33.1817617228171 37.7384958256497  
38.9534635879195 38.8456942580061 39.7394181011603 40.4359177791566  
31.3302670771182 43.9450023643394 40.4136535208406 34.7308008643142  
41.3481355128089  
KRTAP4-7 41.9407041937973 41.8073910693411 42.0621425894624  
44.265834798964 46.2478069975709 42.357910063876 42.22763273471  
38.3684202018524 41.863927676552 38.3501188844251 41.3553369544097  
42.828737648529  
KRTAP4-8 40.3478825593224 46.7591817286632 40.1985790927248  
37.4223289687135 42.7982502551634 46.6872654833579 43.6753843488695  
41.6466169548846 43.0930293831497 43.6033221838149 38.1835938174625  
43.6753843488695

KRTAP5-1 39.5676051939342 34.6306468196142 40.5734458834617  
37.7469621225553 43.004943518025 40.5281496800812 37.3799542961839  
34.9580369221164 42.992884918158 39.6719190054379 42.170702295259  
36.2582325396375  
KRTAP5-10 42.442231667357 44.3529919625344 43.6670755115848  
41.7614975630362 39.2608760193011 37.7000400506818 37.1643693306382  
36.1375121409002 32.1218888714537 40.2112371512838 37.3687900733549  
47.2131144508464  
KRTAP5-11 44.7915315085948 37.920964499903 41.437237454134  
46.7577982595088 39.4693871570028 40.3357777530419 40.9157352260901  
41.1575777497576 40.2274522635576 40.8049408996274 40.2649309204478  
41.1554481567603  
KRTAP5-2 32.2133093774284 51.9421032049606 49.2041300973417  
41.4273122914951 36.5393857306744 38.1169703906207 43.3262148375525  
38.6454098044474 46.3203995372658 56.3441077510744 49.0361180089431  
50.5511827666954  
KRTAP5-3 38.7537364570873 44.5152708955623 37.0642268327439  
46.3203995372658 34.0927410219282 32.2133093774284 36.197424053556  
42.157627240486 31.372171135652 37.1275334308172 38.4689132737495  
33.3192849177028  
KRTAP5-4 38.304249186058 40.4359177791566 34.4716904283753  
34.8137085420423 37.5556299264699 39.8455060654531 40.5585676679482  
46.3685439301234 42.4540072551568 39.8873706855774 39.6403089864678  
36.7762265039864  
KRTAP5-5 42.8036731479932 40.2493681589104 40.931294690669  
38.6414316877471 37.956732373465 41.8613406887824 42.357910063876  
37.6557714476853 38.3418933808844 45.1569741609597 39.2542963855807  
39.7411455670172  
KRTAP5-6 35.7012997405508 42.4493032770053 43.5710871617107  
33.6816578730693 36.7356360093603 41.159706131351 38.941855825269  
39.2672712041774 44.2607789091176 40.3235655331796 38.8507804383261  
36.7762265039864  
KRTAP5-7 40.3478825593224 43.5182502375207 40.0998167098057  
40.7481155008596 39.1650142708257 40.8634043028528 43.4544762830742  
42.7431359850339 42.1594905198929 43.6033221838149 42.5426057453993  
41.2437378488025  
KRTAP5-8 33.8558232866797 37.7384958256497 41.3366779545815  
38.8495095797881 38.5512429290626 39.7394181011603 38.4005795891396  
38.079222289614 38.3418933808844 42.2614524730856 40.3452320167286  
43.1805016690297  
KRTAP5-9 39.1590964332473 46.1569135229922 37.2838080935695  
35.314469458379 37.7576900881741 40.3357777530419 38.0598374201407  
36.7460922671619 33.4698406117406 43.7303813515864 42.5426057453993  
42.57175366709  
KRTAP6-1 46.0023068797812 40.5400384479766 36.3604951341921  
36.9912468186322 38.8456942580061 40.244271403831 39.2533668167483  
40.047314525032 38.8271346375425 37.1275334308172 39.4410515050885  
42.1537476443423  
KRTAP6-2 41.1523487516364 39.6995529770239 46.2625470410195  
46.4555908533915 39.0564222526273 49.641159251878 42.7431359850339  
38.6454098044474 42.1594905198929 45.7911932481722 45.5707650534259  
40.8681871019812  
KRTAP6-3 39.3709357615493 46.3635803515159 36.769073068743  
38.2041059863839 34.1686574241133 37.9003288112261 48.9826868640753

40.047314525032 39.7537274655115 35.0668743708816 43.1931731665131  
37.4554876386402  
KRTAP7-1 43.1805016690297 41.7337506166619 50.2869791217819  
53.2046867327331 44.9936360641969 42.5660695551615 43.8206425661746  
38.5457716679071 47.4699236780425 40.7063426028871 47.6884372645373  
42.1537476443423  
KRTAP8-1 41.6354649482853 40.3384318592985 33.6816578730693  
42.1273928203021 40.5710637884029 40.1428591998404 38.0598374201407  
41.2551966132486 40.7847110517594 37.1275334308172 36.6298807161755  
36.8690774823319  
KRTAP9-3 37.9387791625384 39.0894172982439 37.0642268327439  
35.9521941716188 35.0181575202066 37.4782441311626 35.2163900400329  
37.5511560880902 38.9006788676407 38.8507804383261 35.6041926503637  
38.9496515344837  
KRTAP9-4 41.0608773166058 42.6939394537076 47.1629799536297  
42.8848887336829 46.7058093820839 42.157627240486 43.3262148375525  
46.6384636367629 43.6670755115848 43.1839109702714 40.7725311293918  
41.0657892043496  
KRTAP9-5 39.266565827316 43.1805016690297 39.2707964550441  
39.066284740632 41.0885562160946 40.1428591998404 43.9450023643394  
36.3405039629059 41.2870505273664 40.8049408996274 41.0808257270221  
38.4330755397458  
KRTAP9-8 38.4344387289956 41.8848959280916 42.3536549114165  
44.8727287473605 45.5311794320092 39.6251842352088 42.2143023923639  
42.8899872337087 42.1191165911658 43.4598349902811 41.6336636285875  
42.4607795638552  
KRTCAP2 1985.3999418878 1007.03747721563 1582.45600339543  
1630.25992078321 1868.51164332659 1182.10714525377 1881.7281441986  
1813.65521720537 1366.59129560817 1900.96666834569 1595.69503047506  
1450.53108586858  
KRTCAP3 47.2862299990938 91.5464279432216 78.9701459806641  
40.8681871019812 107.294098632695 45.3882138838137 96.593956699892  
178.379117285008 56.9320717885002 73.4447529556358 96.6294773538052  
88.5638310461364  
KRTDAP 51.7607563002005 52.1062000766427 45.7968648044613  
43.3078542962968 75.7464604972652 36.3845892764084 76.7483302168542  
53.9465584609317 50.5785738734431 54.8979897528792 53.6895401581575  
54.9919060580109  
KRTHA5 48.0201377454632 43.9421822132391 44.7829632472754  
40.3180310664156 44.8897737954573 44.4619248757502 44.0687697278114  
40.2382908228517 40.5912213523345 44.0409178714232 41.2598458726002  
40.5703581862752  
KRTHB6 36.2496364442264 34.5023764006976 32.9174234020987  
45.8844325913247 32.6463318577756 34.5886782974123 39.2533668167483  
33.4534810696886 36.7267557061938 31.1401844809132 32.775958132716  
38.0452862258803  
KSR1 46.0023068797812 46.2286164776607 44.3344900481112 41.5464765641928  
49.9493230064613 42.0574848021044 55.695361644141 49.2019743609873  
49.3780606970538 49.9493230064613 46.4205654140754 47.6040671292013  
KSR2 40.5654775358427 46.6075785304453 42.381482941987 40.6857324478814  
40.8351751854504 38.2293008890613 42.0016830644258 43.2855454938964  
46.4861258030402 42.3433931248155 44.1642484298135 42.171601283248  
KTELC1 254.983975710833 234.873589896708 272.405201392009  
262.215263489321 477.924466983414 232.553783060082 170.223657280542



|          |                  |                  |                  |                  |
|----------|------------------|------------------|------------------|------------------|
|          | 370.917477324773 | 160.152738034528 | 408.739953606815 | 408.991719312986 |
|          | 304.258586051126 |                  |                  |                  |
| KTI12    | 97.0254711947754 | 67.9697948557876 | 66.737740728688  | 68.9937449813561 |
|          | 84.6563174894574 | 58.9676332048764 | 60.5125774827425 | 66.295597720304  |
|          | 60.8635925649592 | 54.8979897528792 | 58.3586374083245 | 58.3586374083245 |
| KTN1     | 104.335120306753 | 226.35806628102  | 252.583117397109 | 131.738693662183 |
|          | 63.8949010662614 | 155.541828028535 | 144.813029178278 | 172.720244584464 |
|          | 262.735075993242 | 132.107655569343 | 170.720099897973 | 241.222680673439 |
| KU-MEL-3 | 39.7576136507593 | 33.4967065724734 | 37.5597671487621 |                  |
|          | 38.8495095797881 | 39.0564222526273 | 37.9003288112261 | 33.1392460259336 |
|          | 37.5511560880902 | 32.8704945047196 | 35.3849221682845 | 39.8184668132023 |
|          | 37.0953622406687 |                  |                  |                  |
| KY       | 45.2875173643252 | 49.7363778831003 | 43.1931731665131 | 62.6048727240291 |
|          | 71.9737561190706 | 55.3202238943712 | 51.5967098638347 | 43.6434576713809 |
|          | 60.5608545741456 | 45.0155543555707 | 53.6895401581575 | 51.5741598315033 |
| KYNU     | 314.782545392841 | 113.026772174726 | 560.413725186282 | 684.238999553691 |
|          | 83.7103049167257 | 71.7021670182761 | 95.3754438202863 | 398.43592055172  |
|          | 191.298525555624 | 59.0216019867146 | 96.981661155293  | 70.4732736918246 |
| L1CAM    | 46.9939712192224 | 45.7317208802318 | 44.5134109184888 | 48.7646976789783 |
|          | 52.2089306840125 | 52.0583273941813 | 47.209353240759  | 50.0526763693329 |
|          | 46.6944238390932 | 50.0564735608363 | 48.042366934301  | 45.4799270968969 |
| L1TD1    | 36.9060997041453 | 32.396635964353  | 35.7105247506212 | 35.0448343468967 |
|          | 38.9496515344837 | 36.8059561571675 | 32.1218888714537 | 37.6557714476853 |
|          | 33.1602385985469 | 36.9102644736882 | 43.3085358214154 | 31.8554734753953 |
| L2HGDD   | 173.100153934025 | 142.365344693239 | 135.436347750159 |                  |
|          | 84.2804410361247 | 132.81898450496  | 94.3953345963359 | 156.833474582387 |
|          | 248.321641540666 | 144.898757916905 | 176.07173250529  | 178.400810392873 |
|          | 170.87055409699  |                  |                  |                  |
| L3MBTL   | 43.6455502856303 | 45.2098033805679 | 46.4225487328006 |                  |
|          | 40.5829008199411 | 59.2945953587048 | 40.7158901597788 | 41.2067319684816 |
|          | 50.8930565655395 | 40.3316153483289 | 53.9725593486384 | 49.8135461150818 |
|          | 51.5900962783802 |                  |                  |                  |
| L3MBTL2  | 172.801059111314 | 129.414877519657 | 158.478919789334 |                  |
|          | 140.662969373546 | 130.585540374294 | 148.312100828662 | 124.44575078108  |
|          | 171.205726660714 | 129.592927998658 | 156.738940207775 | 152.200107222761 |
|          | 124.691222601355 |                  |                  |                  |
| L3MBTL3  | 48.9600850533759 | 50.7046706880325 | 49.2041300973417 |                  |
|          | 48.665578118898  | 42.2510526338368 | 52.7156971154405 | 53.0798381965427 |
|          | 45.8134164254471 | 58.4598072919688 | 69.9928775398776 | 53.20218962208   |
|          | 57.9941756686635 |                  |                  |                  |
| L3MBTL4  | 36.2496364442264 | 39.5050383901884 | 35.5220586859301 |                  |
|          | 39.5050383901884 | 40.3452320167286 | 32.0500360504817 | 41.9393838138203 |
|          | 41.5464765641928 | 34.226171989766  | 36.9102644736882 | 39.8184668132023 |
|          | 43.7672102682067 |                  |                  |                  |
| LACE1    | 46.3390850717989 | 46.29198852834   | 49.5424425850549 | 38.8495095797881 |
|          | 39.1650142708257 | 41.2567470068038 | 37.4772922422734 | 53.1052228246467 |
|          | 49.9162522057712 | 51.4454142248566 | 39.6403089864678 | 44.4475838947656 |
| LACRT    | 44.5282181324797 | 38.6414316877471 | 44.4311655729487 | 41.0726336841311 |
|          | 39.6535880152834 | 40.040778349137  | 42.1607322031054 | 37.7612949798895 |
|          | 41.074824727477  | 42.0621425894624 | 42.170702295259  | 39.3575468494941 |
| LACTB    | 110.860844149372 | 105.027318695305 | 97.4515987591398 | 289.533968432846 |
|          | 152.132756414024 | 93.2870243833082 | 88.9430141071732 | 83.8726595797859 |
|          | 123.480244775709 | 81.7171463878604 | 82.5708447805445 | 112.659254685552 |

|        |                  |                  |                  |                  |
|--------|------------------|------------------|------------------|------------------|
| LACTB2 | 150.262748333939 | 110.746059249478 | 84.3755392205436 |                  |
|        | 110.88526946931  | 95.010312646142  | 85.5027511448958 | 242.792365320043 |
|        | 87.3634135323569 | 130.039674722115 | 122.099297248392 | 80.2381651206227 |
|        | 87.8967913380047 |                  |                  |                  |
| LAD1   | 179.874652000664 | 399.66182195331  | 683.75696650704  | 55.5137408107256 |
|        | 333.731080636948 | 84.7947249929138 | 300.560071753181 | 193.364522980854 |
|        | 362.123479430887 | 250.131114907793 | 272.198774144152 | 216.744244428166 |
| LAG3   | 62.928986708012  | 78.1623301184313 | 78.080034922779  | 140.276520383146 |
|        | 57.9161791762225 | 58.9676332048764 | 59.3549213146532 | 68.3372228877569 |
|        | 48.4869909888679 | 52.0999467564713 | 65.2295773603116 | 46.5650556481721 |
| LAGE3  | 331.762920362224 | 297.260074903246 | 439.46735042867  | 358.498678171092 |
|        | 1405.20888023653 | 536.013150313097 | 673.002926695262 | 703.315796616275 |
|        | 473.688869614777 | 313.660064080622 | 342.829992044257 | 354.861943266984 |
| LAIR1  | 12125.3293116195 | 9938.5091387622  | 12770.8282719641 | 10617.4323014458 |
|        | 10235.3288951482 | 7911.19531717602 | 13230.9863405074 | 10483.5643876539 |
|        | 10072.2414399735 | 10072.2414399735 | 10910.7672404363 | 9181.13240708506 |
| LAIR2  | 51.7607563002005 | 51.909968572392  | 47.9035532886869 | 90.1632837282491 |
|        | 47.2074332636566 | 42.5660695551615 | 55.8510296341925 | 44.8997235283254 |
|        | 49.8304479381623 | 43.8943892311541 | 41.2598458726002 | 42.0709558258414 |
| LALBA  | 42.1537476443423 | 40.0527893189096 | 39.6451483836089 | 39.2780515621926 |
|        | 44.8897737954573 | 38.8336427948187 | 38.5066108855005 | 36.8400213077707 |
|        | 42.992884918158  | 40.6022003765153 | 37.3687900733549 | 33.939263369489  |
| LAMA1  | 49.4151347850687 | 40.4003119241613 | 41.8318916956692 | 50.4733460479197 |
|        | 44.6286581923295 | 39.2248354955045 | 58.0969258817391 | 44.7534143226043 |
|        | 38.0658216688259 | 43.6701228397031 | 44.0409178714232 | 45.3763275588341 |
| LAMA2  | 87.1109435144663 | 58.7460488758053 | 48.9944486068347 | 67.1209520838357 |
|        | 101.549779766678 | 202.325629133577 | 49.1928206164702 | 82.966263655525  |
|        | 49.4786466722535 | 88.5140510969737 | 85.9286114777649 | 87.3429006429216 |
| LAMA3  | 43.9583923615969 | 49.9951674107458 | 98.3126451737573 | 76.2591822114739 |
|        | 44.2607789091176 | 56.233217375698  | 45.1671592018476 | 49.56047820843   |
|        | 68.3157692917711 | 67.5304136525884 | 79.3539393480885 | 160.605530211736 |
| LAMA4  | 223.562130663956 | 97.8389686233842 | 110.112236384679 | 113.783910320605 |
|        | 82.0682043421788 | 273.764998628636 | 43.8206425661746 | 71.6202385170491 |
|        | 43.5669306063196 | 125.243627451767 | 101.187156681366 | 111.874193363836 |
| LAMA5  | 818.290793784784 | 1541.9572099378  | 4328.723715755   | 411.73316510051  |
|        | 1683.24873205783 | 805.309720893073 | 653.880422442079 | 723.853348464335 |
|        | 2013.08489754172 | 1305.35453202355 | 1421.44237064813 | 1261.18520360134 |
| LAMB1  | 119.277678423944 | 84.3401431994754 | 113.322929203297 | 82.0292880742189 |
|        | 101.627551729492 | 68.4323624797175 | 64.0291286735557 | 95.5822406197756 |
|        | 88.4594321382477 | 134.519244495139 | 131.632115558243 | 168.345356470411 |
| LAMB2  | 212.483538335553 | 80.882176929636  | 102.87193290903  | 124.803597244786 |
|        | 78.9088042058577 | 209.214729757636 | 108.945545005203 | 136.190823415283 |
|        | 54.7966692984192 | 180.63535336811  | 192.356440003154 | 105.220978559157 |
| LAMB3  | 62.5239209616027 | 139.66584446954  | 444.169882251299 | 128.732177437756 |
|        | 79.7020636215451 | 52.5745485771927 | 68.3799828461475 | 138.728648830528 |
|        | 177.620987812591 | 193.649113002244 | 156.008696165877 | 169.18132209076  |
| LAMB4  | 38.8561375693335 | 44.5152708955623 | 44.0451487108213 | 38.4208429103799 |
|        | 35.6434124419782 | 38.1169703906207 | 42.2577689927563 | 41.6466169548846 |
|        | 43.6670755115848 | 40.4136535208406 | 39.4410515050885 | 44.4475838947656 |
| LAMC1  | 1089.08276262641 | 648.380417557148 | 1018.35211991691 | 695.255317861845 |
|        | 596.384327208699 | 1282.9181829891  | 373.914455300185 | 543.268021785502 |
|        | 662.848386826617 | 1762.93413846062 | 1485.68317899614 | 1231.77360353254 |

|         |                   |                  |                  |                  |
|---------|-------------------|------------------|------------------|------------------|
| LAMC2   | 82.4900927793125  | 60.5025831340513 | 122.15017220566  | 66.5141009463313 |
|         | 49.2495730217753  | 46.3150221024046 | 47.0740880160359 | 139.768680518677 |
|         | 76.6304273900619  | 66.4251023257203 | 60.8518580136349 | 61.18889498318   |
| LAMC3   | 58.2902084992082  | 68.2521461582047 | 87.104092810486  | 112.957927208627 |
|         | 145.439350995461  | 126.485649460666 | 46.9929836306816 | 155.252915611651 |
|         | 51.1055541075029  | 226.970981973829 | 483.000434270291 | 184.001671627062 |
| LAMP1   | 2071.90741263566  | 1776.78784112613 | 2865.25344854768 | 2167.91218703382 |
|         | 2201.39729904166  | 1564.55598228713 | 2225.65559724391 | 1850.06063216244 |
|         | 2417.02418518222  | 2575.86919902296 | 3043.12489526581 | 1698.18614771363 |
| LAMP2   | 425.60854194674   | 262.37779288036  | 275.222714101589 | 707.4124863603   |
|         | 250.41086379231   | 318.069132873489 | 225.300736968225 | 237.237762964658 |
|         | 325.909358171616  | 192.003788858976 | 194.435776102991 | 275.549982777518 |
| LAMP3   | 46.1673159982664  | 119.512426152446 | 121.023370640285 | 275.407306413402 |
|         | 96.6833301748676  | 45.7300501624017 | 93.8009890556664 | 81.6529991377083 |
|         | 77.2007992738116  | 52.2832912331043 | 55.5276281380084 | 64.9959712888709 |
| LANCL1  | 193.569399061809  | 280.159844300266 | 328.295200683554 |                  |
|         | 146.15014824361   | 253.841638589385 | 373.46798029115  | 215.290701336046 |
|         | 248.194954741095  | 399.66182195331  | 501.319993127353 | 487.065758294354 |
|         | 340.607959072657  |                  |                  |                  |
| LANCL2  | 95.8734933265537  | 99.6265783263109 | 86.7823828209946 |                  |
|         | 79.5838979704243  | 75.0665411373616 | 115.441414762268 | 80.354283778818  |
|         | 61.3864512710242  | 109.374838860558 | 126.670728021682 | 115.622641633992 |
|         | 67.3183506012892  |                  |                  |                  |
| LANCL3  | 41.678190413467   | 43.0227387991135 | 42.5406888281114 |                  |
|         | 39.9697332660833  | 36.131485826118  | 40.0766543123257 | 39.0759686770589 |
|         | 39.512606833112   | 43.6039443285137 | 39.1621898366355 | 38.8507804383261 |
|         | 36.1647506311964  |                  |                  |                  |
| LAP3    | 203.53267380432   | 218.727705098677 | 192.509049577236 | 519.351335801817 |
|         | 135.19133529995   | 286.832539203237 | 144.593933058291 | 143.749408328062 |
|         | 128.151545864228  | 96.3495443565738 | 96.8490167966217 | 146.117756310709 |
| LAPTM4A | 114.666088291556  | 86.277692569799  | 87.104092810486  |                  |
|         | 67.474556589181   | 76.209239524646  | 115.913030448537 | 65.0031119608637 |
|         | 120.357621336736  | 79.5488891958168 | 79.8511759086625 | 84.1922656126304 |
|         | 110.453662843674  |                  |                  |                  |
| LAPTM4B | 1483.40077183826  | 1509.04753111016 | 1027.05274681749 |                  |
|         | 285.626835802986  | 3313.98659031004 | 882.105892529265 | 2126.41018877615 |
|         | 369.451882513347  | 1362.12587130194 | 261.826480747537 | 389.131545459708 |
|         | 731.670315613547  |                  |                  |                  |
| LAPTM5  | 545.827286197333  | 329.72032366183  | 347.552309199761 |                  |
|         | 2405.8635632802   | 146.551751666276 | 404.86512250958  | 301.525915314179 |
|         | 369.797483212264  | 73.6097614332043 | 146.534713287435 | 165.029434090892 |
|         | 154.793640473854  |                  |                  |                  |
| LARGE   | 91.8414653633828  | 106.809028844031 | 117.76002524375  | 67.8978240198575 |
|         | 75.4053820110486  | 150.529917336161 | 93.299474822664  | 183.028254350275 |
|         | 111.2910877211139 | 204.171339006867 | 169.344094528032 | 152.078104394345 |
| LARP1   | 107.427186954956  | 117.706922397135 | 109.696102117537 | 116.374125502825 |
|         | 137.309523231049  | 85.2260422401241 | 100.891869710611 | 108.251353392321 |
|         | 109.456162739433  | 108.111248374368 | 99.7807691901691 | 107.154549409927 |
| LARP2   | 62.358854072801   | 74.8706881113318 | 67.8283214323848 | 74.3523005665671 |
|         | 70.0946091883744  | 66.0411740221276 | 73.1407519625966 | 74.2004711747326 |
|         | 74.280612516205   | 72.182385135126  | 68.4045402746031 | 86.7710020879725 |
| LARP4   | 68.8005532048281  | 73.1107343633971 | 61.6510502615429 | 74.6159297822533 |
|         | 64.0354923953233  | 73.8651427228332 | 70.5534237141767 | 73.362936710475  |
|         | 90.0420794458477  | 85.8154958329408 | 74.3766944386886 | 94.8717345601966 |

|          |                  |                  |                  |                  |
|----------|------------------|------------------|------------------|------------------|
| LARP5    | 427.972184856393 | 419.46223841313  | 414.539381761279 | 356.948763043851 |
|          | 419.993482471924 | 295.999383698826 | 682.35345164708  | 312.530335465784 |
|          | 588.854342793207 | 368.390023942835 | 440.351682914344 | 298.089522641269 |
| LARP6    | 136.657213529097 | 65.2702686717535 | 61.9293105089291 | 101.494432845825 |
|          | 76.6160788176402 | 193.806701229141 | 153.643631245787 | 150.723391206253 |
|          | 87.9206275762349 | 154.455976468088 | 159.949298350852 | 159.844078593375 |
| LARP7    | 150.685575301101 | 197.232697438521 | 205.510539955583 | 187.689343320587 |
|          | 173.536155357688 | 260.426488908824 | 143.399636653204 | 138.840039960639 |
|          | 202.154195547644 | 144.711001798454 | 166.208731611481 | 217.743953847269 |
| LARS     | 263.636675573982 | 176.492987902471 | 231.893992191022 | 217.456127221867 |
|          | 209.581180285499 | 277.069127740648 | 199.152637378893 | 370.64147085217  |
|          | 254.82779318297  | 239.316215255944 | 304.033573873184 | 332.276510973163 |
| LARS2    | 62.9952378379206 | 96.0838701986116 | 127.694844372277 | 69.8314582428552 |
|          | 160.566474370004 | 71.0645521832919 | 129.965747812294 | 62.6984594468418 |
|          | 106.361958225818 | 88.9738853594498 | 105.118498939628 | 107.440379066528 |
| LAS1L    | 64.7766649630041 | 65.5367689605146 | 68.3234331335073 | 68.1992221684165 |
|          | 74.6833250738044 | 78.0586153423713 | 124.324905704041 | 70.2541961995753 |
|          | 109.241121384212 | 73.9732553364283 | 79.6198202883864 | 82.5312123120641 |
| LASP1    | 2067.66516256598 | 2248.64628069362 | 1526.94101719128 | 1455.64106630257 |
|          | 1850.06063216244 | 814.991871217268 | 2791.75465171135 | 2498.54878472152 |
|          | 1950.93175239958 | 1408.59798540643 | 1123.99110499679 | 1241.21734508421 |
| LASS1    | 54.931538325692  | 43.1805016690297 | 42.8270038153139 | 51.0175677516029 |
|          | 43.4544762830742 | 48.8744644207821 | 45.1017494688414 | 40.931294690669  |
|          | 39.4762546236449 | 47.0055981216687 | 41.5421429082231 | 41.0657892043496 |
| LASS2    | 165.640362974584 | 188.042978085327 | 182.551901102169 | 154.829574442056 |
|          | 180.398903465014 | 153.028210322286 | 148.871702513875 | 309.898593637521 |
|          | 162.106596527489 | 145.509901200987 | 147.269661124015 | 158.081235081686 |
| LASS3    | 41.2424637338424 | 50.4872122867759 | 36.3604951341921 | 40.7481155008596 |
|          | 51.6869155634183 | 42.8598805316863 | 43.8206425661746 | 42.5435283762933 |
|          | 41.4636047919453 | 43.9450023643394 | 43.0971787292711 | 46.0633179231318 |
| LASS4    | 70.6065558064758 | 44.0409178714232 | 43.0016969050339 | 38.9534635879195 |
|          | 54.6820069269589 | 44.8872784170036 | 69.3468840908665 | 140.559370165331 |
|          | 74.220854748627  | 81.2992152187529 | 86.582851157193  | 75.2431285480772 |
| LASS5    | 166.399121350223 | 144.835567449189 | 283.484056482174 | 205.413872130332 |
|          | 105.018199901228 | 182.204124363356 | 244.226756210656 | 193.569399061809 |
|          | 211.253227661874 | 261.687486828996 | 228.499788774214 | 180.502282381416 |
| LASS6    | 409.639730837881 | 895.735191953679 | 400.506633704584 | 474.155196153863 |
|          | 466.935292808402 | 414.062259640915 | 430.868309653765 | 659.396637478356 |
|          | 295.061449024268 | 375.529704925121 | 484.968116511768 | 511.067537752967 |
| LAT      | 56.6086202928268 | 51.9421032049606 | 49.4067286971348 | 74.3523005665671 |
|          | 49.1130028157777 | 45.2414128265839 | 43.3925093042325 | 51.4931742685391 |
|          | 41.1241827976738 | 52.5055930058351 | 51.0492389286271 | 45.223075311113  |
| LAT1-3TM | 69.2322821603564 | 56.6146179789815 | 71.1521292570086 |                  |
|          | 79.4528447794527 | 78.0077300979911 | 60.4065050472082 | 58.7585623394335 |
|          | 169.322551237636 | 56.9320717885002 | 59.4969799685856 | 58.6464918752765 |
|          | 48.6037684272115 |                  |                  |                  |
| LAT2     | 65.493000026614  | 53.7332797903102 | 48.4497719907777 | 243.15571937138  |
|          | 44.5152708955623 | 76.2665254494195 | 63.8478970698139 | 48.7213586071409 |
|          | 44.4812539947185 | 47.0055981216687 | 48.4941605474599 | 49.9433644436637 |
| LATS1    | 43.2724556187214 | 38.6414316877471 | 40.7222199182322 | 37.9875302985336 |
|          | 39.9697332660833 | 40.1930209223556 | 39.2780515621926 | 41.7877325563821 |
|          | 40.6957787921451 | 44.1379638573455 | 40.4995052849302 | 42.357910063876  |

|         |                  |                  |                  |                  |
|---------|------------------|------------------|------------------|------------------|
| LATS2   | 49.2595762436995 | 57.2871072823547 | 62.9967097752591 | 86.3663084195994 |
|         | 61.5236837309467 | 96.8185145589133 | 48.0283573444179 | 57.445796273665  |
|         | 43.5669306063196 | 55.1089864632456 | 54.4140381300469 | 60.3816817102326 |
| LAX1    | 44.6231541342    | 105.796515736125 | 99.8231023149756 | 325.275883498219 |
|         | 44.7829632472754 | 119.714551585774 | 60.6548851977964 | 66.1288889125299 |
|         | 45.2897806651929 | 53.9412154719864 | 58.133863696399  | 46.3411353377615 |
| LAYN    | 72.1408243034509 | 64.408176016319  | 76.7791768896805 | 76.7806009547111 |
|         | 66.7426485694967 | 65.9014252111112 | 52.0942589368478 | 59.5830868881343 |
|         | 53.5677764726461 | 61.8529316708431 | 75.3969721155153 | 92.1646038105091 |
| LBA1    | 104.573463811298 | 145.492831993859 | 147.137598111239 | 157.677866955988 |
|         | 91.2681347227088 | 157.658760470424 | 121.945468001236 | 90.9010016862442 |
|         | 92.0711167984454 | 153.660685857642 | 150.636903991608 | 85.5175308034109 |
| LBH     | 106.620429405618 | 86.5414905689606 | 69.4418805893822 | 68.8167148906225 |
|         | 59.5177293266879 | 58.2924877745079 | 47.6810611485413 | 57.8405769800773 |
|         | 54.0626629538146 | 56.3690629871551 | 75.8976034525022 | 78.8320129013551 |
| LBP     | 40.9558083259517 | 44.2630383225933 | 40.5734458834617 | 41.0726336841311 |
|         | 43.9450023643394 | 42.9695585740813 | 37.830876898596  | 39.6474008369935 |
|         | 39.853866204927  | 42.5664883002833 | 41.8168470823451 | 34.6720534245631 |
| LBR     | 47.3791873993182 | 61.6219790276408 | 80.4404044229341 | 72.7934987008399 |
|         | 79.4442697175874 | 92.8951148347802 | 63.5738862549306 | 52.2355943901685 |
|         | 70.6467150815052 | 46.441301934328  | 51.955049625266  | 64.9418945936106 |
| LBX1    | 38.8561375693335 | 38.3322849790657 | 35.3649449469275 | 40.4359177791566 |
|         | 36.8442943492616 | 40.5805725503899 | 39.1539892144371 | 39.4710743516517 |
|         | 41.4636047919453 | 42.8414096678708 | 40.040778349137  | 43.1235886043549 |
| LBX2    | 55.1306642449627 | 44.9370339275041 | 48.4890615340603 | 42.0102671859606 |
|         | 49.8304479381623 | 41.3553369544097 | 51.9421032049606 | 46.5717043290731 |
|         | 57.1016072897358 | 44.1379638573455 | 47.1477056711335 | 39.5418280570561 |
| LBXCOR1 | 44.436995101921  | 44.6918600441328 | 42.5406888281114 |                  |
|         | 40.7481155008596 | 39.3667161654772 | 37.2686490268265 | 36.7356360093603 |
|         | 47.7889447429963 | 46.3203995372658 | 42.5664883002833 | 41.2598458726002 |
|         | 43.4709415392696 |                  |                  |                  |
| LCA5    | 52.0299937917925 | 48.3077814647455 | 43.5710871617107 | 39.9697332660833 |
|         | 42.3685136297603 | 58.0095518210499 | 39.4600924554505 | 42.4580504587581 |
|         | 47.27543600687   | 50.1649089793069 | 47.1477056711335 | 43.1805016690297 |
| LCA5L   | 41.4508241771315 | 44.5152708955623 | 42.9104454767916 | 42.5664883002833 |
|         | 51.3511088648386 | 45.1873487463472 | 42.4939802311136 | 45.7476095696859 |
|         | 52.1186591838715 | 40.2112371512838 | 40.0766543123257 | 47.2131144508464 |
| LCAP    | 42.6036491382658 | 45.2556760873335 | 44.014441886238  | 43.5962371290832 |
|         | 41.2424637338424 | 41.554942319225  | 42.5660695551615 | 40.7799172560245 |
|         | 40.4997186069494 | 44.7520317855773 | 45.6348103033479 | 40.4639532172338 |
| LCAT    | 43.0001432913058 | 57.6831182451733 | 55.4502804236424 | 51.223859150798  |
|         | 47.4548471240051 | 45.4882438975269 | 50.2016912396771 | 39.1652965788406 |
|         | 47.6195009345747 | 57.3562426592112 | 53.6334631215581 | 60.6653636336244 |
| LCE1A   | 41.7397731376692 | 40.7952353240579 | 39.7411455670172 | 39.6292788039793 |
|         | 41.0885562160946 | 35.6125439901743 | 40.0052661202207 | 41.5464765641928 |
|         | 41.074824727477  | 51.0055825931636 | 45.2265319826548 | 42.2577689927563 |
| LCE1B   | 43.1805016690297 | 42.9358255168086 | 41.6079958749402 | 43.6726153508978 |
|         | 43.2484996523549 | 40.650742261428  | 41.8315602975157 | 42.0494116081998 |
|         | 40.3316153483289 | 41.9666541498638 | 45.5707650534259 | 41.4508241771315 |
| LCE1D   | 39.9697332660833 | 43.3458769998118 | 47.2055133646385 | 45.334106390212  |
|         | 45.9104478407175 | 44.0804700754786 | 42.0605906240248 | 41.9315419791594 |
|         | 38.8271346375425 | 45.0155543555707 | 47.0110068985119 | 39.4490233720848 |

|       |                  |                  |                  |                  |
|-------|------------------|------------------|------------------|------------------|
| LCE1E | 38.5007204246293 | 39.7509165247419 | 36.3604951341921 | 35.7330837268961 |
|       | 40.9450021938518 | 34.4896350146096 | 37.55264801907   | 38.610211769318  |
|       | 37.9793521263255 | 36.7426129383934 | 35.2034069152893 | 37.7217193704498 |
| LCE1F | 46.8141313516997 | 29.0303154053123 | 36.178547300352  | 37.4223289687135 |
|       | 38.3561682218911 | 44.4619248757502 | 37.9430145836712 | 34.806104801006  |
|       | 40.8970401536578 | 39.1621898366355 | 36.3390947880186 | 33.0217499673686 |
| LCE2A | 41.9407041937973 | 42.1607322031054 | 27.4352294118391 | 44.0451487108213 |
|       | 38.5512429290626 | 42.157627240486  | 45.3597029614942 | 36.2539950294089 |
|       | 41.2870505273664 | 37.7315666632629 | 46.1673159982664 | 38.745552403895  |
| LCE2B | 38.5007204246293 | 35.6434124419782 | 38.9790184198145 | 36.3604951341921 |
|       | 38.5512429290626 | 38.2293008890613 | 36.3194282084339 | 44.4031868028216 |
|       | 39.4762546236449 | 34.8137085420423 | 33.8558232866797 | 38.1421709520616 |
| LCE2C | 34.8099089553046 | 40.7952353240579 | 41.6079958749402 | 42.1273928203021 |
|       | 35.9894133432376 | 45.4882438975269 | 41.253645578517  | 32.6039814489621 |
|       | 39.853866204927  | 42.1622837416589 | 40.8225507267584 | 41.2437378488025 |
| LCE2D | 38.6454098044474 | 40.4359177791566 | 38.9790184198145 | 36.3604951341921 |
|       | 39.859345745831  | 36.3845892764084 | 42.2577689927563 | 36.7460922671619 |
|       | 37.5469247328848 | 41.3321861371202 | 38.8507804383261 | 41.7575097298927 |
| LCE3A | 39.6609238036815 | 37.8217989841918 | 32.2133093774284 | 34.7266486944713 |
|       | 37.1565984182084 | 36.3845892764084 | 40.0052661202207 | 37.2237132058632 |
|       | 34.5633623842083 | 37.920964499903  | 38.3684202018524 | 37.2810767789306 |
| LCE3B | 39.3709357615493 | 40.7952353240579 | 43.9450023643394 | 45.1944222548351 |
|       | 50.2163892855092 | 32.6368705146258 | 46.3057385979341 | 42.8482181313226 |
|       | 36.9060997041453 | 41.1222709786153 | 41.9083581529276 | 33.8196020406676 |
| LCE3C | 40.0557788909923 | 38.4330755397458 | 38.4043916290561 | 39.3750969348308 |
|       | 35.0181575202066 | 37.2686490268265 | 44.9863726205428 | 35.1738399826814 |
|       | 42.6366765186182 | 41.4397539024976 | 39.8184668132023 | 47.9566297250148 |
| LCE3D | 38.0089018744739 | 40.6380495994768 | 42.2577689927563 | 38.4208429103799 |
|       | 41.7929491793697 | 39.3841861812262 | 35.4623691645629 | 45.3872406432794 |
|       | 37.5469247328848 | 35.195364621675  | 39.3667161654772 | 38.745552403895  |
| LCE3E | 36.8072833828297 | 37.6383530120621 | 47.0940613507321 | 38.4208429103799 |
|       | 39.859345745831  | 40.650742261428  | 44.2166118829877 | 39.6474008369935 |
|       | 45.8325181856483 | 38.8507804383261 | 39.6403089864678 | 42.0424641526302 |
| LCE5A | 50.0466349801009 | 39.6123051184545 | 45.1569741609597 | 41.6564075217517 |
|       | 41.467005949568  | 44.9896851005259 | 43.1931731665131 | 43.0390857698452 |
|       | 40.8970401536578 | 46.1390887492649 | 43.0016969050339 | 43.1805016690297 |
| LCK   | 44.9370339275041 | 45.4757965005055 | 43.3567925731226 | 46.8954576545929 |
|       | 42.9655396732962 | 41.7148762080045 | 45.2875173643252 | 44.8623097069578 |
|       | 41.3468610075772 | 43.1472052452951 | 43.6236257870216 | 40.8277078176464 |
| LCMT1 | 246.433145017965 | 285.053017606956 | 447.248719481853 | 255.800286504974 |
|       | 536.73426937255  | 313.115027781064 | 430.618167106529 | 486.757854744053 |
|       | 301.139592414061 | 250.799060762208 | 252.649651285136 | 237.532800487032 |
| LCMT2 | 139.062073456923 | 144.239350177363 | 73.845912534353  | 85.1847490113446 |
|       | 181.966839676473 | 122.405413080836 | 162.486448421519 | 152.920586451578 |
|       | 158.493140172253 | 91.9185612536409 | 110.214922820817 | 105.91905761474  |
| LCN1  | 36.2496364442264 | 45.0905928998779 | 39.1799070031819 | 41.7614975630362 |
|       | 47.8075998240396 | 42.750861693377  | 42.1607322031054 | 44.6107027295193 |
|       | 42.5406888281114 | 39.8873706855774 | 43.3085358214154 | 43.5738557773903 |
| LCN10 | 38.385865183581  | 43.5873188565519 | 46.4569566520107 | 32.1218888714537 |
|       | 36.5393857306744 | 44.7804080899431 | 36.8369172900902 | 39.7509165247419 |
|       | 38.5252456306656 | 44.8997235283254 | 38.956280281655  | 39.2469742642337 |
| LCN12 | 43.6706764143908 | 38.3874422458351 | 42.2577689927563 | 46.6849259108754 |
|       | 48.0234896130991 | 39.4953494583071 | 41.9918605927928 | 43.1567024035183 |
|       | 42.992884918158  | 42.7275315121163 | 46.201352759435  | 43.5738557773903 |

|         |                  |                   |                  |                  |
|---------|------------------|-------------------|------------------|------------------|
| LCN2    | 5177.04105968809 | 231.198764780818  | 899.223276238109 | 858.975085087497 |
|         | 208.7739716139   | 229.926637466766  | 6819.74871209328 | 474.155196153863 |
|         | 616.912306849151 | 78.3851687801705  | 121.195506364658 | 820.147156401172 |
| LCN6    | 40.148780650831  | 34.9262464079777  | 38.2280071951674 | 44.9370339275041 |
|         | 39.9697332660833 | 50.7516773099639  | 39.2533668167483 | 39.6474008369935 |
|         | 37.1820543575123 | 41.7405682794166  | 65.088713927995  | 41.2437378488025 |
| LCN8    | 36.1232327599945 | 40.7952353240579  | 39.991353369336  | 39.5050383901884 |
|         | 41.8806343997257 | 37.0180934800573  | 49.8281348927244 | 38.8495095797881 |
|         | 39.7537274655115 | 36.5806287103157  | 40.9157352260901 | 39.3575468494941 |
| LCN9    | 49.540449125788  | 39.1982470626863  | 39.7411455670172 | 41.7614975630362 |
|         | 45.3675390992851 | 39.7394181011603  | 46.7100796279384 | 38.5457716679071 |
|         | 40.2274522635576 | 40.6022003765153  | 43.3085358214154 | 43.9541718254769 |
| LCOR    | 106.140215438654 | 183.714803682303  | 151.205675888138 | 139.554519110944 |
|         | 86.2836002982515 | 112.873697337138  | 165.107387190373 | 340.429325650126 |
|         | 171.485221601137 | 460.340300658834  | 303.670126704469 | 277.665554240228 |
| LCORL   | 43.4626049853157 | 41.6069493017095  | 39.2388980107385 | 47.420942961753  |
|         | 42.0709558258414 | 42.0847226073592  | 42.1607322031054 | 38.4128104869434 |
|         | 40.4518431978241 | 37.6637152940566  | 44.7926323492519 | 40.6614700944853 |
| LCP1    | 1430.73068989193 | 1009.47177197543  | 754.903348372161 | 4858.39551231606 |
|         | 642.211963248041 | 647.297964303385  | 1297.78424326775 | 748.372940917543 |
|         | 713.685405035516 | 244.560715635796  | 316.917793468502 | 262.327538467461 |
| LCP2    | 50.4872122867759 | 49.6203214143464  | 51.3268475761593 | 290.546420262364 |
|         | 54.0126916508417 | 46.4648868771662  | 48.4859552186772 | 57.445796273665  |
|         | 46.3203995372658 | 40.2112371512838  | 44.8872784170036 | 45.0985088502363 |
| LCT     | 42.0833588105728 | 39.8695929627783  | 40.6737160001291 | 39.3750969348308 |
|         | 36.2048942610546 | 40.5805725503899  | 38.7745734037492 | 41.4812544772644 |
|         | 41.3803269429468 | 41.8613406887824  | 35.860430241131  | 36.3454320848591 |
| LCTL    | 61.356483470053  | 45.1694246393676  | 48.6037684272115 | 53.593974682612  |
|         | 47.2074332636566 | 50.7516773099639  | 43.5627649099623 | 38.8495095797881 |
|         | 55.3122077514658 | 44.2580151149956  | 44.6286581923295 | 52.2832912331043 |
| LDB1    | 41.8409927585705 | 42.2577689927563  | 41.6079958749402 | 38.8495095797881 |
|         | 42.0709558258414 | 37.7000400506818  | 49.3854238365325 | 39.9576138799997 |
|         | 35.6970528713709 | 43.1839109702714  | 37.8372168909583 | 40.9683275553869 |
| LDB2    | 235.33716196909  | 150.723391206253  | 306.578554914328 | 267.475563253966 |
|         | 154.111066539468 | 337.948887427898  | 60.7992483126292 | 170.327588764719 |
|         | 61.1560835966725 | 230.0537444836012 | 294.813541173888 | 167.920131968611 |
| LDB3    | 40.8681871019812 | 40.9291911731327  | 42.4890076400051 | 42.0102671859606 |
|         | 42.6615964978834 | 41.1201550367451  | 40.2601451506332 | 39.5215827396813 |
|         | 42.4682481612094 | 44.619512785899   | 40.4094901248527 | 40.7042849030193 |
| LDHA    | 2024.4791883541  | 3114.05035137552  | 3234.36469403715 | 4148.07163380544 |
|         | 2257.78227736778 | 2911.10227993347  | 2528.6392272518  | 1152.55315876935 |
|         | 5971.45293864208 | 1197.13566108661  | 1117.26060212107 | 3361.67247904403 |
| LDHAL6A | 43.5710871617107 | 37.10170285405    | 42.3536549114165 |                  |
|         | 44.4367387274922 | 40.9950639693255  | 39.2248354955045 | 41.0381860307445 |
|         | 44.6107027295193 | 40.6957787921451  | 43.0919221375514 | 37.0180934800573 |
|         | 45.5800840647989 |                   |                  |                  |
| LDHAL6B | 37.55264801907   | 35.7393138893354  | 38.1421709520616 |                  |
|         | 37.3600014814388 | 39.859345745831   | 41.2098211956301 | 36.2561152084183 |
|         | 39.5083491499018 | 39.6609238036815  | 38.8295492252264 | 39.2542963855807 |
|         | 38.7012264805355 |                   |                  |                  |
| LDHB    | 176.991120397205 | 943.73554571528   | 556.092573451208 | 332.322497133752 |
|         | 481.698684512916 | 515.216890329893  | 476.653723741096 | 322.774093041134 |
|         | 703.315796616275 | 661.269882993465  | 585.421238639853 | 1111.89793143647 |

LDHC 41.9407041937973 41.0269624684418 42.5406888281114 43.3744503319109  
 43.6782245625941 41.8161064926185 40.9157352260901 43.1945567870367  
 41.863927676552 41.2276963324981 40.4504608195666 42.57175366709  
 LDHD 38.4330755397458 45.0905928998779 50.8303921211581 46.4555908533915  
 37.8343741244069 41.9543948167375 90.0682241853516 43.5544347011646  
 45.1899271235974 51.173096357454 51.3103617600342 39.8873706855774  
 LDLR 478.939577875017 495.359878931451 347.145902252055 451.290681710534  
 488.649780652311 624.51670158046 403.243939813779 1161.71671016964  
 1217.21440297138 128.521748930472 177.29096218424 413.516548092483  
 LDLRAD1 42.0532901689036 46.3635803515159 43.401782064778  
 48.1662933382789 41.8806343997257 44.3648993568405 43.8206425661746  
 43.6434576713809 46.0106098064475 40.4136535208406 36.9060997041453  
 45.8546719310325  
 LDLRAD2 47.2862299990938 42.8542642792862 38.4043916290561  
 42.5664883002833 44.2607789091176 40.5281496800812 43.9450023643394  
 40.831207953647 41.1742244762318 44.571915452417 43.401782064778  
 41.5536168238478  
 LDLRAD3 39.6609238036815 42.7775752471711 45.6989664108554  
 47.3574589211166 44.8897737954573 42.9695585740813 41.9393838138203  
 49.9332280449549 41.5635499110307 42.3606390470387 45.8180710486329  
 44.6484005362281  
 LDLRAP1 103.252085427319 57.4054069675016 63.7744603935682  
 69.5544840164738 77.1287755867582 50.9724155054821 76.3583555666815  
 84.607833108004 92.3388129097482 77.9978216366573 71.751972433516  
 57.445796273665  
 LDOC1 311.985010273921 56.2305155589239 73.967017874248 98.3948200992292  
 86.1633564934019 333.421080658854 207.710354513208 232.911951245618  
 49.641159251878 227.535855856645 201.977265056102 165.311139930529  
 LDOC1L 136.947616119439 107.005820817545 75.2977438265751  
 77.5698542248061 119.86041265821 121.441763452598 89.4747568145717  
 118.341308125578 88.2639730639822 106.418690759491 93.5045354990096  
 115.814483757002  
 LEAP-2 47.1962846565261 52.1967540852276 42.0621425894624  
 39.1706564265495 41.0885562160946 40.5281496800812 64.7023558190673  
 142.714450804595 45.2897806651929 47.9056710878325 64.6446465846487  
 72.4651758215622  
 LEAP2 50.6473771879221 109.386655134289 40.6737160001291 55.8709511400674  
 40.5710637884029 43.0860383229288 336.679355848349 2021.38214786118  
 97.8764110456132 383.705244574204 913.704049709264 695.255317861845  
 LECT1 46.7704450730477 46.862000182278 41.8751578329365 45.6706505553383  
 43.2484996523549 43.3269087731399 44.6032218589199 47.9363875418976  
 43.9204029310411 45.9004543328976 43.4709415392696 43.5420658412177  
 LECT2 43.6706764143908 39.6123051184545 44.3344900481112 38.6414316877471  
 38.6454098044474 39.2985791324641 34.806104801006 38.956280281655  
 39.2809305246091 39.7835513496873 31.498275130159 38.4330755397458  
 LEF1 142.69744253318 98.6553805168141 112.159199477006 113.979504140326  
 72.5752072120178 46.5387044784895 50.8388984085636 86.0944261788554  
 53.4292590928092 57.4218233943605 99.8231023149756 58.47356854625  
 LEFTY1 41.6354649482853 34.5023764006976 39.991353369336  
 41.7614975630362 39.859345745831 39.6251842352088 38.8417151851134  
 43.2551508830106 39.7537274655115 41.6373771565199 45.4799270968969  
 42.6758568421347  
 LEFTY2 47.4678477186801 42.5269793679335 41.1367478979484  
 43.8002456102021 51.4527545197672 50.7516773099639 43.1931731665131



|         |                  |                  |                  |                  |
|---------|------------------|------------------|------------------|------------------|
|         | 39.9576138799997 | 43.3744503319109 | 39.2623423164488 | 40.547835538778  |
|         | 39.3575468494941 |                  |                  |                  |
| LEKR1   | 41.3387790895716 | 41.8073910693411 | 42.9104454767916 | 42.1273928203021 |
|         | 37.6527901109005 | 43.7630587657205 | 37.6036146841933 | 47.2864663693787 |
|         | 40.4220196471124 | 51.0055825931636 | 39.9899430628542 | 38.4330755397458 |
| LELP1   | 42.6036491382658 | 41.554942319225  | 40.0998167098057 | 37.5382094267692 |
|         | 42.3685136297603 | 37.3799542961839 | 42.2577689927563 | 38.745552403895  |
|         | 38.9834959368496 | 40.6022003765153 | 39.4410515050885 | 41.863927676552  |
| LEMD1   | 47.0940613507321 | 36.89524015739   | 48.0191002461099 | 40.4359177791566 |
|         | 39.859345745831  | 39.4953494583071 | 37.830876898596  | 37.7612949798895 |
|         | 42.1594905198929 | 44.2580151149956 | 34.3633615460307 | 42.2577689927563 |
| LEMD2   | 219.238235572894 | 207.600413958886 | 182.49650467392  | 146.405413944753 |
|         | 149.899176549323 | 131.659314490437 | 192.470747766298 | 107.024775568171 |
|         | 177.261319004133 | 204.710892826638 | 191.979759198021 | 162.908986027874 |
| LEMD3   | 242.751164798133 | 217.658421476562 | 213.380798420955 | 187.026092504992 |
|         | 158.071355628454 | 172.777241940677 | 212.090033606355 | 197.011675186182 |
|         | 354.634819362978 | 336.159430045964 | 329.282615395786 | 314.006301513986 |
| LENEP   | 32.4552405279874 | 35.1224289925572 | 35.0970060242246 | 42.357910063876  |
|         | 35.0181575202066 | 39.0266821712099 | 36.08956004634   | 41.3506832276112 |
|         | 33.1602385985469 | 38.528621456378  | 35.1470994647364 | 35.1451084093692 |
| LENG1   | 36.5393857306744 | 53.1278271804774 | 57.9279989359711 | 47.6687908290818 |
|         | 51.0107745412152 | 57.6034762511847 | 47.5963750520409 | 39.1652965788406 |
|         | 55.4030910454028 | 46.6598879466655 | 53.5698357689852 | 52.9609836781499 |
| LENG8   | 50.315768338317  | 52.683711208052  | 51.9885249508283 | 53.8086134112366 |
|         | 58.7460488758053 | 42.4580504587581 | 44.3440839686558 | 45.2806199505029 |
|         | 45.0997987980157 | 71.3900857589616 | 61.3529667465225 | 63.1443731864055 |
| LENG9   | 45.1912496459517 | 41.2598458726002 | 46.0727230219512 | 40.5484717678957 |
|         | 37.956732373465  | 42.0574848021044 | 50.0088611244948 | 44.0390019242862 |
|         | 45.5779686360641 | 47.3791873993182 | 41.9908237694988 | 41.3481355128089 |
| LEO1    | 111.522812019895 | 95.2292899846287 | 61.5236837309467 | 72.0694688774804 |
|         | 104.914715637173 | 97.8052968915826 | 144.771861156788 | 85.2849531543957 |
|         | 149.330073823683 | 61.6183748238619 | 83.7103049167257 | 103.376225272425 |
| LEP     | 93.7352369697358 | 63.4570909617664 | 70.7760293129408 | 89.7002002853947 |
|         | 62.6860949544223 | 99.1667512831715 | 87.1735705257803 | 167.578081645481 |
|         | 66.7008819035152 | 110.837476359817 | 115.40235710164  | 88.9189119296399 |
| LEPR    | 45.5900027662185 | 43.3057780183445 | 44.4581200816365 | 45.4634652319753 |
|         | 43.3838505886856 | 82.6602736441839 | 40.9731067463382 | 58.865217170468  |
|         | 45.0579715284942 | 73.5025309968566 | 73.1841981188179 | 65.9234534736156 |
| LEPRE1  | 179.267796142741 | 89.7862835647016 | 103.43536623122  |                  |
|         | 154.019005732316 | 137.878417253635 | 85.3718124658316 | 87.0685571351947 |
|         | 85.7732262204681 | 89.6115806694241 | 100.271925566074 | 81.4702220063796 |
|         | 84.4349803529132 |                  |                  |                  |
| LEPREL1 | 99.0545942554244 | 223.397586938079 | 116.295564219236 |                  |
|         | 98.3948200992292 | 112.311249826645 | 123.032006903803 | 138.027432399991 |
|         | 115.995213598177 | 177.261319004133 | 487.64491967937  | 394.764369100963 |
|         | 422.58866112053  |                  |                  |                  |
| LEPREL2 | 181.586195566181 | 48.1627097465883 | 43.1931731665131 |                  |
|         | 78.9479233685889 | 102.282066142307 | 101.020328028769 | 75.4053820110486 |
|         | 115.328304312071 | 43.8482802038826 | 98.2843999216669 | 91.3723635213821 |
|         | 78.6705291023488 |                  |                  |                  |
| LEPROT  | 262.98784416804  | 413.723725202787 | 498.284928805673 |                  |
|         | 609.797179957996 | 359.83890067786  | 665.510487460287 | 371.709014310561 |
|         | 391.397318564183 | 208.529062113623 | 509.004054793277 | 383.371300272181 |
|         | 464.352441400358 |                  |                  |                  |

LEPROTL1 157.250548147161 158.349509235411 199.480636964499  
291.785618741057 123.978615472736 167.760135663101 143.042664581646  
110.048921728774 108.815245119101 195.968119243879 208.529062113623  
240.520228413182

LEREPO4 45.2875173643252 39.9697332660833 41.785676764591  
43.3078542962968 38.0598374201407 38.8336427948187 37.7136011474903  
43.6434576713809 39.9444191873552 37.2089297656361 41.4508241771315  
37.8490162439785

LETM1 47.6397712007919 69.3106426188075 65.1185966859561 55.8709511400674  
87.2282539094452 52.8421046802739 60.3928833351886 52.5098795466615  
66.603126065489 66.0786923699684 63.6057995724852 51.7833333848627

LETM2 49.1868644496737 43.5182502375207 42.8270038153139 48.665578118898  
37.3508690072156 42.157627240486 45.7452456977857 45.8669209716694  
48.7358147030082 39.6719190054379 44.1148826235374 45.1735152121056

LETMD1 126.10194284238 153.341618067133 191.426587373391  
116.617120294216 161.573327074375 177.845412804098 108.750364850147  
165.160683489444 154.455976468088 235.047133588022 188.582370265555  
211.227389226633

LFNG 173.992867985744 188.36429659391 205.650076927315 166.488589768213  
98.2650999749912 67.0290776715331 54.1157382341041 57.5640428227111  
103.561100886469 209.89649461562 198.729330487352 142.532754436212

LGALS1 7075.82842238887 1171.207937488 1398.21942794938  
5932.92478996609 1762.93413846062 5156.59948231705 1078.86166154061  
1466.88103496067 2581.34849558524 3282.4852236415 2581.34849558524  
2506.05102956991

LGALS12 42.9104454767916 43.2649781354792 37.1643693306382  
46.1673159982664 44.5668141895992 45.9266745571724 42.0605906240248  
43.4544762830742 53.838484549134 43.2988017098387 43.3085358214154  
42.9887069977696

LGALS13 46.0023068797812 40.9731067463382 46.5650556481721  
45.1944222548351 50.0580547772867 41.6590564937735 44.3440839686558  
43.5544347011646 47.27543600687 45.6868589181768 38.1835938174625  
46.4499258373233

LGALS14 40.148780650831 38.861780967827 35.5833299694641  
40.3691324547049 44.0977148249302 39.2985791324641 37.4425446412772  
43.844855336215 39.9777866059804 38.9207612933107 42.046575509735  
44.7871262003648

LGALS2 30.7315474127249 43.4396866157171 41.1367478979484  
63.1604223919703 39.3667161654772 48.9826868640753 38.5066108855005  
40.2382908228517 49.4786466722535 39.8873706855774 37.7384958256497  
38.745552403895

LGALS3 170.150808455621 109.23113111292 99.9841766494502  
245.660544821992 56.9360840563854 194.079940066252 90.8691042645133  
134.407474121421 91.1834104205004 140.921774805792 124.903031106573  
130.62791061956

LGALS3BP 826.490051619826 818.927157206447 882.105892529265  
198.190904631121 816.746599467159 405.852280880924 311.901423694475  
539.720977763663 766.027617496754 409.811889288372 615.011590811277  
575.863848923457

LGALS4 74.9006142438341 58.7111274254142 156.433762355183  
41.1886975241176 37.5556299264699 46.574682061365 42.629412460409  
66.6320017520888 52.5772854102326 119.095094052197 277.12373983597  
191.668846959973

LGALS7 41.8409927585705 46.6314009405034 41.6977706798234  
 41.7614975630362 45.9104478407175 32.9046688061235 39.4600924554505  
 71.1607965028029 39.3750969348308 37.7315666632629 37.2018803984555  
 42.7782216342806  
 LGALS8 86.503774181307 91.7158434954226 108.806649898122  
 150.583488352207 80.2112932898502 85.9636350040248 68.0529308175297  
 61.205981079878 97.8009303343756 103.808640431626 89.2185019250322  
 105.563773939475  
 LGALS9 94.3674661847143 138.50445813694 100.824660338235  
 209.31241212773 70.6225093592927 84.7113556042844 265.790391813663  
 184.750252804038 192.003788858976 81.8648220673828 74.6662312145629  
 64.0541263553251  
 LGALS9B 48.8704059222613 56.7569186600983 46.02045129728  
 54.9919060580109 49.2267897689452 48.1591264215184 67.1299518044849  
 54.5125550937898 55.8160649599186 47.3791873993182 46.8712941728147  
 45.9104478407175  
 LGALS9C 33.5994525227062 35.4484652445078 30.561906108551  
 31.7207795618545 30.8824580894159 32.9046688061235 30.9403229851671  
 31.5151915411476 31.372171135652 31.1401844809132 29.9932610852132  
 31.372171135652  
 LGI1 39.6292788039793 41.0226232127351 43.1931731665131 40.1804147506786  
 41.3387790895716 44.4619248757502 41.9918605927928 38.4540849632254  
 45.7206695113999 42.1622837416589 48.3570240922825 42.8864415494484  
 LGI2 58.8224410806741 43.0227387991135 45.5883690965192 41.1886975241176  
 39.0564222526273 53.4466111440611 38.6243997507646 39.9576138799997  
 44.1519466943185 42.785429206422 43.844855336215 46.3411353377615  
 LGI3 39.1590964332473 41.8073910693411 38.0452862258803 35.314469458379  
 39.3667161654772 35.2067831864574 39.1539892144371 36.6452480995946  
 39.6609238036815 40.8049408996274 35.5179217192467 38.0452862258803  
 LGI4 35.0202257459026 28.768101860452 44.7829632472754 39.7411455670172  
 38.2496050953547 44.4619248757502 42.629412460409 37.0390589468421  
 37.7384958256497 39.9948390976317 34.064698871541 38.1421709520616  
 LGMN 377.573838771285 356.318517117856 476.653723741096 487.749060801066  
 293.410413883219 734.705859548078 223.219262492785 225.875798191473  
 252.870708814507 471.59454368268 452.351360652434 497.290172759099  
 LGR4 51.9545473262296 73.7873098190297 59.4431489877328 45.8844325913247  
 47.8075998240396 46.6872654833579 44.9863726205428 42.5435283762933  
 54.4059109100338 33.6188027862739 49.3901004211918 64.0541263553251  
 LGR5 42.1537476443423 50.543526404059 41.528370959196 43.8002456102021  
 51.2525124735102 40.650742261428 41.9393838138203 44.1311654985682  
 40.4220196471124 44.3648993568405 46.4753015651202 43.2776458914333  
 LGR6 35.7532128798963 37.8217989841918 37.8983368352946 37.1317006162938  
 37.7108122449858 36.0306975524309 42.357910063876 37.1747156131306  
 38.1528638128634 45.9667142574745 35.9563099719284 39.4895632499291  
 LGR8 40.0557788909923 39.6123051184545 40.0998167098057 37.29566077996  
 40.8873907150245 37.5887129572848 41.4742337714895 37.0390589468421  
 41.2870505273664 39.3698811593364 40.2649309204478 40.0557788909923  
 LGSN 36.9660447385262 40.4772513262052 42.2577689927563 41.7614975630362  
 41.3387790895716 39.9777866059804 40.968974769473 42.157627240486  
 60.7480970026669 43.401782064778 41.9908237694988 41.3948836161924  
 LGTN 111.248876636045 158.806855832703 219.737294408079 144.94134446105  
 239.70137568297 242.503720442197 185.165420581989 157.543887960599  
 204.200566808626 298.313562383092 198.226275659825 220.192552354287

LHB 40.8681871019812 48.0296332183129 46.6588655218735 39.2780515621926  
49.5666074434383 36.0306975524309 38.4005795891396 38.4540849632254  
55.5086026637973 38.1042454705119 37.9946685306274 43.0930293831497  
LHCGR 36.5393857306744 40.4359177791566 44.5134109184888 35.6928955245309  
41.6806984441849 43.4681646416585 43.3262148375525 42.9301944191913  
40.6957787921451 43.9450023643394 41.7272875295469 36.5474283500601  
LHFP 255.365088438518 147.841274204532 107.413918714848 131.277614500948  
144.578232267116 529.650395907046 62.1970616836737 100.499763255098  
54.8946088631931 177.173301602325 197.232697438521 149.352994264999  
LHFPL1 40.9558083259517 42.1607322031054 35.3649449469275  
33.6816578730693 36.7356360093603 44.2607789091176 40.5585676679482  
37.33030683349 38.3418933808844 33.5412189543102 39.2542963855807  
47.0130468198828  
LHFPL2 257.050603883498 163.280931300437 291.713831398096  
504.281506941044 160.405341429329 129.909461876076 130.648278937122  
148.906660152784 250.086163187797 245.489660195494 255.724996015069  
196.322377166278  
LHFPL3 49.8472708021525 43.683792219729 46.2625470410195  
55.0604256312495 41.9842695818285 50.0748292497578 49.3854238365325  
41.7419877611072 48.4869909888679 47.1001757441025 51.7538628098347  
49.6629259325705  
LHFPL4 41.9407041937973 32.9795880920156 43.401782064778  
35.7674462337723 41.1868052124344 44.6524308640784 37.7136011474903  
40.3357777530419 40.8970401536578 39.7835513496873 38.3684202018524  
47.1060577218993  
LHFPL5 33.4902421268456 38.6414316877471 35.6139301508335  
37.8442841690502 38.6454098044474 33.2552842693684 38.4005795891396  
40.5158867964016 35.6139301508335 33.1559412791294 38.1835938174625  
38.4330755397458  
LHPP 99.9752275166514 104.409397223301 230.242190204243 97.3870880869036  
148.043320937247 164.487183006292 96.1825551158198 153.35286239647  
212.530138323284 263.706801812277 266.717224821545 265.728967648382  
LHX1 46.3390850717989 41.8073910693411 37.4642807402741 42.4580504587581  
44.5668141895992 43.3785777889265 43.8206425661746 51.0724630072723  
47.0804681460898 46.1390887492649 42.6366765186182 43.5738557773903  
LHX2 49.2595762436995 44.7829632472754 38.8775560911841 42.8235313007746  
59.4830424460714 51.4931742685391 72.5956443098684 62.1934012861178  
41.3803269429468 40.8049408996274 39.153226699662 39.8497227447888  
LHX3 42.180412278616 39.6468378915777 41.5525560925775 43.6039443285137  
44.2041279061157 38.8609342044635 41.6410858691518 41.0381860307445  
41.1238005120685 38.0468891408775 41.1349567921107 42.5267710131643  
LHX4 44.1294459089314 45.1694246393676 43.0971787292711 44.1483976313959  
44.6834648302383 50.3245489035833 47.4439407315335 65.0656365694468  
41.7627910693483 43.2988017098387 49.0361180089431 45.5800840647989  
LHX5 41.6354649482853 42.8542642792862 44.4311655729487 42.0102671859606  
40.9950639693255 47.8636003588181 39.6535880152834 42.0494116081998  
44.4395580493118 51.4454142248566 42.911855821602 42.357910063876  
LHX6 70.3757673501097 64.8903340853337 97.7114610828769 125.573953188965  
82.8232026162231 85.3718124658316 57.3199610379543 57.5640428227111  
57.7155177133893 59.1496467460507 55.6972661824064 59.4889192275198  
LHX8 36.8072833828297 42.0709558258414 36.9795961564828 67.474556589181  
39.859345745831 39.9397419279057 43.0930293831497 41.8417024632349  
40.5912213523345 44.4652605017595 39.5399188536544 45.0035308952466

|        |                  |                  |                  |                  |
|--------|------------------|------------------|------------------|------------------|
| LHX9   | 40.8091178323174 | 36.5474283500601 | 36.0306975524309 | 35.49696651597   |
|        | 39.1650142708257 | 40.9506062495231 | 39.3585350448719 | 40.831207953647  |
|        | 37.1506761793345 | 38.745552403895  | 38.3166554965434 | 35.2448979801094 |
| LIAS   | 54.0170817319522 | 58.0458175620469 | 72.5835488194631 | 64.2130157241811 |
|        | 125.690995228055 | 91.3418781023824 | 52.8496345990125 | 61.0831990510269 |
|        | 70.5171002055327 | 78.839411865787  | 78.0020909283414 | 96.5175130622216 |
| LIF    | 68.6627996695828 | 52.683711208052  | 47.5673419710251 | 53.0284011078097 |
|        | 56.0477607422828 | 70.1074782747874 | 65.1041577962151 | 132.52749757795  |
|        | 47.5564423692142 | 42.0621425894624 | 48.3847843498476 | 42.2577689927563 |
| LIFR   | 42.9104454767916 | 44.2105195734073 | 45.310660704531  | 44.9370339275041 |
|        | 42.4864576619427 | 63.3612993417558 | 52.8496345990125 | 38.3684202018524 |
|        | 46.9739160257217 | 51.9547984751408 | 61.0094935318105 | 45.0035308952466 |
| LIG1   | 196.389446842567 | 169.838827072973 | 182.079641528208 | 94.080489738662  |
|        | 153.660685857642 | 70.5699797830702 | 198.257381933305 | 142.309369995384 |
|        | 262.735075993242 | 127.49459343016  | 84.8084949516218 | 95.3145142003966 |
| LIG3   | 75.5431466087264 | 55.4106986624448 | 62.0008474085033 | 50.318696054607  |
|        | 76.153346954349  | 64.7905331739366 | 69.2582988646396 | 75.6223346148565 |
|        | 68.0295963383707 | 69.8231400816467 | 70.999734997491  | 63.9869572942624 |
| LIG4   | 41.3387790895716 | 47.5647821785529 | 43.2734966874463 | 47.0033848638449 |
|        | 49.32293280121   | 51.0041669707586 | 47.2927436772465 | 49.2532817667694 |
|        | 44.5303781239209 | 41.800198520267  | 42.5824910860403 | 45.7562276914441 |
| LILRA1 | 42.3433931248155 | 41.8848959280916 | 39.4710743516517 |                  |
|        | 41.7614975630362 | 39.6535880152834 | 45.1873487463472 | 38.5066108855005 |
|        | 39.0620487644635 | 41.5635499110307 | 44.8997235283254 | 34.266241549578  |
|        | 45.5800840647989 |                  |                  |                  |
| LILRA2 | 44.8914371498528 | 44.6918600441328 | 46.2625470410195 |                  |
|        | 221.743315748689 | 38.9496515344837 | 60.7488007939604 | 50.5252048155459 |
|        | 31.8228237796461 | 36.8127605061228 | 39.7835513496873 | 39.3667161654772 |
|        | 43.4709415392696 |                  |                  |                  |
| LILRA3 | 44.7915315085948 | 47.9128504683618 | 53.4088637045445 |                  |
|        | 288.335410596699 | 44.3557408297309 | 58.3882937676176 | 112.805898501551 |
|        | 43.9604529016594 | 39.9791973792384 | 38.9207612933107 | 43.6629145624937 |
|        | 41.3948836161924 |                  |                  |                  |
| LILRA4 | 32.5418171758086 | 36.9994058279362 | 38.0452862258803 |                  |
|        | 34.9221408381038 | 28.4576210094757 | 40.8634043028528 | 39.2533668167483 |
|        | 33.8558232866797 | 38.8271346375425 | 36.6893251782922 | 44.8872784170036 |
|        | 37.0953622406687 |                  |                  |                  |
| LILRA5 | 80.6844261396045 | 49.2934904960601 | 47.2629127279171 |                  |
|        | 486.487366153374 | 59.7629007954215 | 67.8882074477657 | 146.701131209299 |
|        | 66.8684224881475 | 41.6285300488826 | 41.4397539024976 | 42.6913548400127 |
|        | 63.6966761077037 |                  |                  |                  |
| LILRA6 | 40.148780650831  | 41.8848959280916 | 41.1367478979484 |                  |
|        | 45.7397504535169 | 40.2062851265091 | 41.9097689475185 | 41.294200401933  |
|        | 41.9721968713295 | 43.2239171482126 | 41.0057887014368 | 41.9455842688118 |
|        | 41.6086894860496 |                  |                  |                  |
| LILRB1 | 1254.34397143795 | 735.60603239712  | 1004.28134410536 |                  |
|        | 1448.17151189672 | 673.002926695262 | 507.620619345969 | 1058.61208471961 |
|        | 1921.48678333837 | 554.163106145921 | 1573.61108703981 | 1513.74711975248 |
|        | 1105.00321488322 |                  |                  |                  |
| LILRB2 | 50.7390160399184 | 58.568646851882  | 56.0642694832108 |                  |
|        | 316.831358204198 | 51.4230529326653 | 65.0391287166255 | 79.953657052127  |
|        | 54.6603683143597 | 42.5880983514685 | 42.7211272990786 | 44.1642484298135 |
|        | 44.9645354363967 |                  |                  |                  |

LILRB3 5566.52516420571 3088.44063817936 3786.90274075023  
5074.07305640514 2559.659041589 2018.28984520892 4458.76622334251  
6749.14636741447 2384.00264993279 5018.90384962952 5246.60459228386  
3818.71752181269  
LILRB4 52.9609836781499 49.1283590719461 53.6396970125549  
254.792341536652 49.1263312877155 55.8938720883203 53.7423898357583  
50.9099078696349 44.7752571196612 41.2598458726002 39.9070785037411  
41.7575097298927  
LILRB5 63.9851732498913 64.0903425729408 46.8267540220952  
92.999328769924 85.0017995689256 200.203393423652 57.0262601962425  
61.2343203799193 40.5912213523345 55.9283039581662 50.6726688944968  
81.9504925867759  
LILRP2 43.0930293831497 40.3384318592985 43.6670755115848  
37.5382094267692 49.32293280121 41.4508241771315 40.9157352260901  
46.7980335276155 46.1101825640108 48.0211752672327 41.2598458726002  
41.5536168238478  
LIM2 41.3387790895716 38.0226905622357 45.4865173433646 37.7469621225553  
39.4693871570028 38.3418933808844 39.3585350448719 41.2551966132486  
39.4762546236449 43.6033221838149 41.2598458726002 41.5536168238478  
LIMA1 327.283431584541 139.414044294473 187.347386400244 165.606015336587  
149.950764820034 242.339375770778 129.965747812294 212.622278823808  
426.276230164353 349.678894821881 352.339572553069 608.005012673672  
LIMCH1 195.968119243879 215.770028283461 500.794458547464  
57.8277957325085 58.037539503209 183.584085676174 139.855023065402  
402.571146447946 273.764998628636 465.981133154896 502.67939538729  
706.914069768466  
LIMD1 45.2875173643252 42.8542642792862 39.4710743516517 38.8495095797881  
40.8873907150245 36.3845892764084 45.4799270968969 38.5457716679071  
45.8325181856483 42.9866214102525 41.4508241771315 43.8575940017119  
LIMD2 43.0001432913058 43.3458769998118 39.6451483836089 37.29566077996  
39.5595233162192 33.2552842693684 40.1235656101329 38.2782436497441  
46.2027193115397 36.4651112441576 42.4580504587581 42.9887069977696  
LIME1 183.918927595056 211.451463038315 185.94424664238 359.185856400148  
256.995917821765 109.738537924214 202.01900875263 130.673639258681  
154.111066539468 125.946162432491 177.261319004133 98.9017950719795  
LIMK1 52.1767356387324 47.1332119496722 42.5406888281114 52.9156540211793  
49.6507190068324 43.6670755115848 46.0228732507872 44.4031868028216  
45.5779686360641 45.4882438975269 42.357910063876 47.7508139534968  
LIMK2 54.8153573978511 65.4589642146912 70.1347490781514 133.610670717456  
72.4325984501758 51.4349390827895 74.621822948059 50.6666199323963  
62.370559099758 52.1767356387324 55.6617952786921 52.7058899469693  
LIMS1 126.930102684077 188.30834153268 189.055029582117 311.149068752273  
122.738749904222 105.036862798568 112.519759295176 113.655306804539  
122.877322487518 105.563773939475 110.947379383048 153.341618067133  
LIMS2 71.5484567134601 59.5534127075228 69.6554376880691 58.0218262176065  
53.0419743379342 402.221227674218 44.6032218589199 48.272324215504  
37.8319142847141 212.152751915521 255.047622225942 181.420545696696  
LIMS3 36.6480005877129 39.0894172982439 43.3085358214154 42.4580504587581  
38.745552403895 37.9003288112261 33.2425023465738 37.4484310268909  
43.1805016690297 48.7414853386615 39.8184668132023 38.5279745308203  
LIN28 38.957687788868 41.6466169548846 34.8956628705329 43.6726153508978  
37.5556299264699 34.6977013306396 42.0605906240248 38.745552403895  
33.2715481910159 38.6454098044474 36.3390947880186 38.745552403895

LIN28B 47.6397712007919 42.7775752471711 40.4070046183108  
 48.1662933382789 104.072423445726 46.574682061365 37.1643693306382  
 37.1317006162938 42.7150227340364 37.4302011516587 44.3763859390287  
 38.8495095797881  
 LIN37 61.7551416187554 49.9085372049438 51.0539624358342 52.1201052574162  
 50.3713170502557 55.0009147092272 66.6894494536346 56.2441895183416  
 57.0301170427216 50.8826620053386 51.3861659123096 48.6795178347248  
 LIN52 52.502055890816 57.5941849631773 60.0856496605043 52.3004056941891  
 60.0736861987141 67.3469281984384 49.1067959632109 51.9447450229707  
 53.9287524861617 47.4767851750188 46.8954576545929 59.7999569757275  
 LIN54 60.3381680822012 63.8399092891728 59.0308764112247 80.4007868743886  
 69.3468840908665 58.7404123614695 72.4651758215622 76.6094442444074  
 95.2956103624468 64.2174369755376 65.485076402841 68.3234331335073  
 LIN7A 43.1805016690297 46.1569135229922 42.4580504587581 62.0404348860702  
 37.7576900881741 57.3797835448761 71.6890300780549 49.085741080241  
 79.7061415085215 52.0999467564713 39.8184668132023 49.9692385479389  
 LIN7B 78.5216977073842 98.0967511777819 99.3448096967314 75.7666827480067  
 116.882934971483 110.467254789988 102.852046099268 76.2258667419953  
 124.738024302128 108.111248374368 98.9560329133205 67.0331844416938  
 LIN7C 41.8409927585705 50.315768338317 46.4569566520107 45.6706505553383  
 42.039525923161 46.5387044784895 44.2733573199954 42.3887531663733  
 46.5411372437515 43.2988017098387 47.5733603903505 48.3648494350286  
 LIN9 53.1309801459151 62.9904770954043 53.0630927250439 40.4359177791566  
 63.4753448572245 54.4753345912615 68.2708120569221 70.5322939116406  
 76.7100878053735 48.2596564318071 57.8991270166934 57.290967307936  
 LINCR 61.7551416187554 50.2696827764943 49.2041300973417 68.6379135603075  
 44.4489662507893 43.3785777889265 75.0665411373616 95.0350792557735  
 44.4395580493118 45.5776159432079 48.9754340235127 43.6753843488695  
 LINGO1 125.321349772971 54.2445399731644 45.1569741609597  
 46.0228732507872 77.8355333140359 40.1428591998404 47.1345949868029  
 107.971806573919 49.9951674107458 40.7063426028871 37.92304440150891  
 46.4499258373233  
 LINGO2 43.5710871617107 41.554942319225 36.9795961564828  
 37.5382094267692 33.8558232866797 43.9724628401189 39.2533668167483  
 37.7612949798895 40.137818555383 39.7835513496873 49.2206713037152  
 40.4639532172338  
 LINGO4 49.1868644496737 41.3610369241157 46.3411353377615  
 49.7350276169552 48.8381507187986 50.0748292497578 45.3597029614942  
 49.3880946790306 41.074824727477 44.3648993568405 44.2925355984056  
 45.8546719310325  
 LINS1 51.2357940824786 49.2934904960601 48.3847843498476 48.1662933382789  
 52.3732353425563 49.1013967533186 43.4933087941017 41.294200401933  
 51.4413099192899 50.4882744710823 50.7159667633757 51.0353379555613  
 LIPA 475.881757842864 463.84209540456 698.595302020108 1030.31910195147  
 309.698059657254 429.453114391562 333.421080658854 273.320144423733  
 516.076634990003 306.115856873599 389.481124074714 452.797096652556  
 LIPC 39.8662795144616 55.0190472891348 45.063792968927 40.4359177791566  
 51.0107745412152 50.3651647989555 124.032371632524 49.8344973836834  
 42.357910063876 43.3465699185405 38.5252456306656 43.2177497174408  
 LIPE 54.0170817319522 57.5197017161209 59.7483827511172 39.9697332660833  
 69.1862663389904 52.7156971154405 66.5422130374814 51.0724630072723  
 63.7046039657949 61.3529667465225 68.878562323012 58.0218262176065

|        |                  |                  |                  |                  |
|--------|------------------|------------------|------------------|------------------|
| LIPF   | 44.6231541342    | 46.5650556481721 | 44.9758339877851 | 47.8164193292842 |
|        | 48.2748123114598 | 46.574682061365  | 51.3064929551674 | 52.407151732257  |
|        | 44.7058233759912 | 38.6454098044474 | 46.4205654140754 | 42.1537476443423 |
| LIPG   | 66.9417866448504 | 78.59966540743   | 46.02045129728   | 142.048367760597 |
|        | 61.1216330559316 | 42.5193208629123 | 299.890705180422 | 124.841811761412 |
|        | 76.6027293497456 | 43.1839109702714 | 43.1931731665131 | 49.6203214143464 |
| LIPH   | 48.6621527194963 | 55.9644250454789 | 50.3950981988762 | 38.8495095797881 |
|        | 46.9906120932727 | 39.0266821712099 | 53.3111230705754 | 40.2382908228517 |
|        | 52.2631308081333 | 46.8954576545929 | 56.8436081694537 | 57.5372732453319 |
| LIPJ   | 38.304249186058  | 36.7976562409506 | 43.0016969050339 | 35.3829784221072 |
|        | 39.859345745831  | 39.2248354955045 | 37.0564573649223 | 39.7509165247419 |
|        | 39.3750969348308 | 38.4187686307607 | 38.745552403895  | 40.6614700944853 |
| LIPK   | 43.9309845324767 | 46.6314009405034 | 40.1985790927248 | 45.0798408927912 |
|        | 41.5668884168669 | 47.7556758818053 | 44.8643898647322 | 47.0940613507321 |
|        | 43.8482802038826 | 41.0057887014368 | 46.0905079010237 | 39.7411455670172 |
| LIPL   | 41.187562301961  | 35.2859513908541 | 38.4456289125816 | 36.7186180663551 |
|        | 40.7273974755431 | 38.1699123824764 | 42.5660695551615 | 38.0254606843504 |
|        | 43.6039443285137 | 39.8873706855774 | 38.3166554965434 | 38.0089018744739 |
| LIPL2  | 44.3355304829989 | 40.0527893189096 | 38.3166554965434 | 37.9875302985336 |
|        | 40.8873907150245 | 32.9046688061235 | 40.7910160811527 | 43.5544347011646 |
|        | 41.5635499110307 | 40.5090849993014 | 42.0750889188255 | 40.3691324547049 |
| LIPL3  | 39.1590964332473 | 39.1982470626863 | 35.9305494063137 | 38.9534635879195 |
|        | 35.2163900400329 | 41.7627910693483 | 41.8315602975157 | 36.5393857306744 |
|        | 43.1805016690297 | 37.6383530120621 | 38.5668610487033 | 32.7800533388945 |
| LIPL4  | 44.3355304829989 | 40.8392856644676 | 46.6588655218735 | 41.2551966132486 |
|        | 45.2556760873335 | 44.1737502492846 | 48.8319884367456 | 39.1652965788406 |
|        | 45.8325181856483 | 42.6793753550854 | 43.5710871617107 | 43.1805016690297 |
| LIPT1  | 71.751972433516  | 69.8231400816467 | 100.975810139572 | 59.3884552643289 |
|        | 81.1670374208916 | 91.8986731227209 | 64.3228642615016 | 65.4045346634146 |
|        | 66.9499465764301 | 65.7485862534792 | 63.0763092522598 | 78.2975954230203 |
| LITAF  | 1004.28134410536 | 1093.84714207969 | 1723.37649434054 | 6606.35767508139 |
|        | 711.773459577386 | 1868.51164332659 | 1335.4111951034  | 918.083610591772 |
|        | 973.363245512859 | 748.372940917543 | 851.108027634251 | 1731.19220270448 |
| LIX1   | 43.5710871617107 | 39.0102066700839 | 42.0621425894624 | 44.0451487108213 |
|        | 40.8873907150245 | 44.0804700754786 | 43.1931731665131 | 46.2779564481158 |
|        | 43.0930293831497 | 38.2069499294002 | 41.8168470823451 | 48.1627097465883 |
| LIX1L  | 71.2963721541702 | 61.8492980174846 | 62.9313387640547 | 121.737071786167 |
|        | 81.2359429678503 | 123.493308132159 | 57.7805922926828 | 58.8022152133979 |
|        | 57.3385421837183 | 71.5032996449402 | 72.544822622412  | 96.0539709962851 |
| LLGL1  | 282.445037659981 | 269.963186760811 | 261.195021649777 | 120.679433440203 |
|        | 222.696947669812 | 147.033637977077 | 395.634889855838 | 205.510539955583 |
|        | 226.023657887826 | 152.426698798326 | 215.131274710043 | 188.928047145068 |
| LLGL2  | 43.8550481835503 | 48.0462738405188 | 46.1364790186809 | 42.0621425894624 |
|        | 47.3172462673426 | 39.4607972824612 | 43.5865682375507 | 45.8095171770165 |
|        | 50.977432027367  | 40.8970401536578 | 45.8180710486329 | 43.2776458914333 |
| LMAN1  | 43.2724556187214 | 47.9128504683618 | 47.646800205189  | 38.3166554965434 |
|        | 40.3452320167286 | 51.294537308199  | 38.8417151851134 | 42.5435283762933 |
|        | 48.1174861108648 | 40.6022003765153 | 39.2542963855807 | 46.8129509799753 |
| LMAN1L | 42.6036491382658 | 39.0894172982439 | 40.1985790927248 |                  |
|        | 41.8778873678551 | 43.4544762830742 | 45.6129956328415 | 41.706879587091  |
|        | 37.86982638952   | 45.6582729799009 | 43.6033221838149 | 42.7275315121163 |
|        | 43.8575940017119 |                  |                  |                  |



|        |                  |                  |                  |                  |
|--------|------------------|------------------|------------------|------------------|
| LMAN2  | 51.413025495745  | 50.9643363406241 | 49.1067959632109 | 61.3747706295648 |
|        | 50.3713170502557 | 57.6034762511847 | 50.6774883370457 | 50.0526763693329 |
|        | 59.5093038629766 | 49.9493230064613 | 58.4816190076338 | 64.0541263553251 |
| LMAN2L | 161.7095047889   | 105.902612356755 | 138.81810375553  |                  |
|        | 98.3948200992292 | 215.68113524702  | 168.78407943637  | 110.729504563799 |
|        | 109.137372445043 | 131.645714321903 | 201.301705082976 | 187.888403806895 |
|        | 132.93879018892  |                  |                  |                  |
| LMBR1  | 96.0236731791095 | 157.906415100288 | 189.164097331837 | 147.689479458785 |
|        | 207.30460556799  | 142.846665249354 | 98.0023132593711 | 96.8240908274121 |
|        | 185.703644892356 | 93.955760127914  | 136.825026294861 | 131.068763088422 |
| LMBR1L | 52.5792653122861 | 51.7495306734657 | 50.6987358483181 |                  |
|        | 43.9282059368202 | 48.9627346956003 | 56.4819802857598 | 50.0088611244948 |
|        | 52.5909491535773 | 49.9162522057712 | 43.7303813515864 | 53.3078448066074 |
|        | 47.9566297250148 |                  |                  |                  |
| LMBRD1 | 167.578081645481 | 564.468049419762 | 405.148979342648 |                  |
|        | 305.619340338331 | 197.421622315466 | 446.757901018137 | 240.6614822416   |
|        | 231.333080775773 | 289.410651581802 | 344.737170118121 | 481.905052451245 |
|        | 563.065549077627 |                  |                  |                  |
| LMBRD2 | 54.0990839134272 | 47.765848710116  | 49.5424425850549 |                  |
|        | 43.8002456102021 | 44.4489662507893 | 42.9695585740813 | 44.6032218589199 |
|        | 57.2350830635912 | 54.7966692984192 | 43.401782064778  | 45.0589947942306 |
|        | 49.1200355938198 |                  |                  |                  |
| LMCD1  | 245.630020408551 | 99.3596089438084 | 112.159199477006 | 230.879083362388 |
|        | 130.184962393833 | 975.02086340962  | 74.7534423194688 | 170.327588764719 |
|        | 55.1253465069845 | 184.025325436339 | 253.764071470001 | 731.071171171638 |
| LMF1   | 53.0290605707162 | 50.1027491117756 | 46.0727230219512 | 47.8164193292842 |
|        | 53.3086645804786 | 45.2852528185486 | 42.4939802311136 | 48.5681478665796 |
|        | 53.4604353973381 | 58.5087296620514 | 57.8991270166934 | 50.7487159427973 |
| LMF2   | 327.024556075244 | 234.556113280762 | 238.584514797019 | 335.249352041342 |
|        | 279.782392390288 | 229.159869771704 | 236.759651096748 | 348.450810225807 |
|        | 228.054565950253 | 411.857557412386 | 340.429325650126 | 214.427113386942 |
| LMLN   | 43.7585538437696 | 47.2055133646385 | 57.50915811428   | 39.2780515621926 |
|        | 59.8102324370568 | 39.8455060654531 | 46.9929836306816 | 35.7973685350741 |
|        | 41.1742244762318 | 46.7646877499666 | 38.6662194645633 | 43.5738557773903 |
| LMNA   | 445.307046237791 | 328.387270297393 | 561.509463439533 | 387.631477822638 |
|        | 355.00914527669  | 646.323419285676 | 390.834121304799 | 470.676006277762 |
|        | 316.256605575595 | 334.349204174886 | 355.568857981155 | 261.326713935356 |
| LMNB1  | 80.0866955521632 | 135.644934816665 | 71.5484567134601 | 237.693838921691 |
|        | 138.728648830528 | 69.64983895075   | 185.924923239764 | 103.945335792682 |
|        | 110.983311402531 | 43.4885245598939 | 37.2892641289258 | 51.8562635270111 |
| LMNB2  | 279.521995263196 | 553.328261478032 | 255.365088438518 | 208.30969642805  |
|        | 1364.06060391538 | 300.803955139552 | 539.879151334921 | 319.328571608303 |
|        | 689.738256133922 | 194.896610327943 | 194.046072415847 | 229.659465419141 |
| LMO1   | 41.1523487516364 | 38.2263227947189 | 30.561906108551  | 33.1817617228171 |
|        | 38.2496050953547 | 69.9819944829311 | 34.6720534245631 | 32.1260264272477 |
|        | 38.0213051227859 | 38.957687788868  | 43.0971787292711 | 40.1700117452801 |
| LMO2   | 60.8357760968871 | 85.8193610859455 | 95.2915739972533 | 93.6212502203405 |
|        | 61.7566103867825 | 104.059057437473 | 70.2635892414678 | 91.5258329186709 |
|        | 93.6124140212565 | 73.3479915711031 | 95.8149149211251 | 76.889690218685  |
| LMO3   | 45.2875173643252 | 43.4396866157171 | 41.467005949568  | 50.378948785456  |
|        | 41.6806984441849 | 474.729653426958 | 48.8319884367456 | 60.3292008119645 |
|        | 48.0163377492228 | 255.800286504974 | 237.754990288051 | 239.229093340475 |

|              |                  |                  |                  |                  |
|--------------|------------------|------------------|------------------|------------------|
| LMO4         | 1176.37732422904 | 397.108901822735 | 188.386331007465 | 618.892379887961 |
|              | 420.401914084346 | 610.853753376105 | 892.323580265478 | 376.453560620912 |
|              | 403.428042132639 | 514.70012608304  | 548.815225941887 | 543.640122689871 |
| LMO7         | 75.8122107270212 | 42.8542642792862 | 41.8751578329365 | 39.5050383901884 |
|              | 44.7829632472754 | 37.7000400506818 | 48.6395795163502 | 47.0940613507321 |
|              | 48.6494451061637 | 56.1912096308988 | 52.2229654768933 | 61.0025829061063 |
| LMOD1        | 66.2154717217675 | 48.4980626712175 | 50.2869791217819 | 58.3475983630509 |
|              | 44.5668141895992 | 605.970682363975 | 43.0930293831497 | 63.0748373122119 |
|              | 40.0403898620771 | 581.093069802913 | 519.775555680262 | 280.622184239624 |
| LMOD2        | 44.2350046179299 | 42.2577689927563 | 45.6989664108554 | 52.5307002738469 |
|              | 46.8674366115656 | 41.159706131351  | 42.4939802311136 | 44.797320243931  |
|              | 45.5779686360641 | 48.4890615340603 | 42.5426057453993 | 45.6692241948108 |
| LMOD3        | 678.684833360104 | 373.172504097546 | 463.527266972118 | 557.094756796515 |
|              | 288.642294976    | 269.963186760811 | 565.72800641089  | 927.61341837276  |
|              | 345.811673759417 | 1048.98028527123 | 1073.84987604662 | 711.08269990525  |
| LMTK2        | 47.4678477186801 | 49.1283590719461 | 51.3268475761593 | 44.0451487108213 |
|              | 52.6922486991742 | 45.0882356578404 | 46.3057385979341 | 70.7238101239421 |
|              | 45.0017158586743 | 42.9866214102525 | 40.9157352260901 | 49.3984571719129 |
| LMTK3        | 289.410651581802 | 73.0385284042351 | 92.4350913779886 | 62.1776700757427 |
|              | 222.16475904496  | 59.4949177415847 | 54.4934782594218 | 188.196662406725 |
|              | 321.550107822925 | 95.1000239210194 | 162.833785414988 | 95.614885914917  |
| LMX1A        | 38.5392451096108 | 35.5992418192964 | 38.8417151851134 | 40.0345676922624 |
|              | 39.382148430786  | 41.6045220683604 | 41.0381860307445 | 43.0390857698452 |
|              | 41.7233690251839 | 41.4864279238825 | 39.7556710804722 | 41.193860915995  |
| LMX1B        | 45.2875173643252 | 40.148780650831  | 40.7620472083159 | 49.3654837541353 |
|              | 40.3452320167286 | 40.8634043028528 | 38.0598374201407 | 39.4710743516517 |
|              | 42.1594905198929 | 40.6022003765153 | 40.723990462047  | 36.8690774823319 |
| LNP1         | 33.9561816279577 | 41.554942319225  | 44.0451487108213 | 39.7411455670172 |
|              | 39.1650142708257 | 37.2686490268265 | 44.0687697278114 | 38.1835938174625 |
|              | 37.9273653326866 | 37.920964499903  | 38.1835938174625 | 41.0657892043496 |
| LNPEP        | 47.9915414951747 | 49.8512010216731 | 65.0102534173543 | 59.2778887402357 |
|              | 58.5946363700203 | 51.2405397507224 | 54.0170817319522 | 58.0353195691931 |
|              | 51.9314757410473 | 50.5252048155459 | 48.2910530887214 | 53.3334895722793 |
| LNX1         | 46.7293238583888 | 51.3800036046133 | 47.0055981216687 | 45.334106390212  |
|              | 40.148780650831  | 45.9266745571724 | 52.0942589368478 | 60.5571721986885 |
|              | 37.8319142847141 | 44.6918600441328 | 47.299647867533  | 47.6938628797168 |
| LNX2         | 57.2960245538881 | 84.8084949516218 | 85.271985416622  | 56.4578213622965 |
|              | 71.2787833369055 | 65.4643755537228 | 92.8579489575841 | 88.1861828863404 |
|              | 108.589036223189 | 113.655306804539 | 100.300863150751 | 97.3929166450379 |
| LOC100008589 | 554.163106145921 | 554.163106145921 | 341.466774417813 |                  |
|              | 463.527266972118 | 661.269882993465 | 141.206849814363 | 971.856840043688 |
|              | 990.431472174705 | 576.140066807763 | 233.501069644324 | 332.230531176052 |
|              | 423.989018031638 |                  |                  |                  |
| LOC100101120 | 37.4554876386402 | 38.8336427948187 | 41.8751578329365 |                  |
|              | 47.3574589211166 | 44.147557390293  | 44.0804700754786 | 41.706879587091  |
|              | 41.1575777497576 | 41.9635525160083 | 45.5776159432079 | 38.2795150354677 |
|              | 40.6614700944853 |                  |                  |                  |
| LOC100101121 | 44.5282181324797 | 39.0894172982439 | 41.9666541498638 |                  |
|              | 41.4273122914951 | 43.9450023643394 | 39.8455060654531 | 35.4623691645629 |
|              | 41.4508241771315 | 42.0621425894624 | 39.1621898366355 | 37.9946685306274 |
|              | 37.6557714476853 |                  |                  |                  |
| LOC100101266 | 43.0462952354436 | 48.4980626712175 | 43.1660110696573 |                  |
|              | 44.3440839686558 | 40.831207953647  | 37.9003288112261 | 41.4742337714895 |

42.9887069977696 41.3468610075772 39.4710743516517 41.4860822396574  
41.5132248356707  
LOC113230 89.7554896946341 51.9421032049606 74.5886835786452  
45.1944222548351 69.3468840908665 48.9826868640753 57.51482768194  
102.818879165949 77.9028721785469 65.429256309049 65.8748459696377  
53.3904307221902  
LOC113386 139.855023065402 129.299077627671 120.582525405708  
138.053682842992 330.550018306903 194.666769955149 250.621261212308  
90.500550952567 186.795349445177 140.598583034034 171.058650956601  
172.95999061341  
LOC115648 43.0001432913058 41.9894412416874 43.4709415392696  
43.5627649099623 44.5668141895992 46.3715909653832 37.2892641289258  
42.5435283762933 40.137818555383 41.8613406887824 42.4580504587581  
39.5418280570561  
LOC116236 67.6767845246581 78.1204313889396 63.7744603935682  
56.6458456890715 81.2359429678503 46.263826584899 61.5000955267432  
64.7318794662958 95.9999165639785 58.115198353247 59.8509516999438  
62.4743608775767  
LOC116349 42.9104454767916 42.4493032770053 37.2838080935695  
44.4367387274922 41.2740822675592 46.7800033479223 35.9058393060637  
43.1567024035183 40.5912213523345 40.1179210534118 39.9070785037411  
37.1747156131306  
LOC116412 41.2424637338424 38.4757888225478 39.9519547348106  
36.1562979552173 38.5512429290626 46.0905079010237 40.1235656101329  
36.43924066428 42.1089765085639 43.4885245598939 44.5878355090414  
38.745552403895  
LOC119358 42.5193208629123 42.6939394537076 47.2055133646385  
43.4410741327254 47.0954207417646 46.4648868771662 49.8281348927244  
42.157627240486 42.4540072551568 47.1001757441025 42.170702295259  
45.0985088502363  
LOC120364 41.7397731376692 41.3610369241157 44.696023817801  
45.0798408927912 40.3452320167286 49.1013967533186 42.357910063876  
40.6171774724171 42.4540072551568 39.6719190054379 41.4508241771315  
39.8497227447888  
LOC120376 50.4872122867759 56.2305155589239 43.9450023643394  
40.5484717678957 47.9128504683618 60.9822577063534 72.5956443098684  
70.0697974278875 66.0350709576651 69.2963913574682 59.501103909345  
58.2879293130296  
LOC120824 38.8561375693335 43.7644428186265 46.7508829977587  
43.5627649099623 44.9936360641969 49.641159251878 44.7255207589606  
43.2551508830106 39.0775870687758 44.3648993568405 39.2542963855807  
40.1700117452801  
LOC121006 42.442231667357 40.8880530359822 38.8775560911841  
46.2462906014337 43.004943518025 41.4508241771315 40.0603121770344  
41.9315419791594 39.3750969348308 40.1179210534118 42.4162492820012  
39.9519547348106  
LOC121792 41.0608773166058 39.0894172982439 44.5134109184888  
35.0448343468967 39.1650142708257 43.7630587657205 41.5817737564592  
35.7973685350741 36.6312676076142 35.7202909649682 41.9908237694988  
43.5738557773903  
LOC121952 41.0608773166058 44.3529919625344 44.1452943804044  
45.1944222548351 43.9450023643394 47.8636003588181 41.3594868055879  
42.2577689927563 40.7847110517594 47.0055981216687 42.0750889188255  
43.3744503319109

LOC121981 36.1232327599945 39.2907645923217 41.528370959196  
46.0228732507872 40.4639532172338 42.0574848021044 43.9450023643394  
40.5158867964016 41.9635525160083 39.6719190054379 38.3684202018524  
43.3744503319109

LOC122038 42.3433931248155 41.0678614026819 42.640829914102  
40.4359177791566 46.3150221024046 37.8102105794655 35.1307934330047  
40.931294690669 40.4220196471124 42.3606390470387 37.0180934800573  
44.3521099857368

LOC123688 101.211796615204 73.5534417023453 76.3583555666815  
90.8188865732032 67.5047089908724 64.0020613101392 83.5895816521251  
125.573953188965 56.9621724830201 115.853867920678 131.598749174097  
107.440379066528

LOC123876 40.8681871019812 34.3715326040967 38.4043916290561  
33.9645433044281 35.1411239266238 37.4782441311626 43.8206425661746  
38.5457716679071 45.0997987980157 42.1622837416589 38.3684202018524  
36.1647506311964

LOC124216 49.2595762436995 57.2231446406982 57.423873475544  
53.8086134112366 44.6834648302383 41.6590564937735 51.9421032049606  
39.6474008369935 46.4164127487052 48.1392888470269 53.0177144132449  
49.8253396161069

LOC124220 198.15553991394 51.6060290544385 91.0443726041992  
50.5310598656998 40.5710637884029 37.1317006162938 41.3594868055879  
54.9919060580109 57.678188678075 69.9928775398776 52.5930185400362  
79.2989156727401

LOC124512 283.563531065269 284.795064481553 347.145902252055  
377.409970666607 272.545033107746 307.002236094206 337.084861453686  
292.99497881914 366.129480083279 308.231730523135 272.604402990069  
366.326747630465

LOC124685 38.385865183581 37.5469247328848 43.8495248991589  
42.2496337895968 43.004943518025 37.8102105794655 38.7337086062875  
40.831207953647 38.1169703906207 42.5664883002833 38.079222289614  
39.9519547348106

LOC126075 42.1537476443423 43.5182502375207 43.6670755115848  
37.0732977341185 40.6723334103791 43.7630587657205 38.5066108855005  
40.831207953647 39.2809305246091 37.6383530120621 38.079222289614  
42.1537476443423

LOC126147 45.1912496459517 37.920964499903 41.6977706798234  
34.6468794865286 61.3077641493507 38.7340969861754 38.0598374201407  
45.4757965005055 35.5220586859301 41.5435611403119 42.6366765186182  
36.449101775775

LOC126520 37.8386378737561 33.6902293666089 48.8941062980393  
42.357910063876 40.9950639693255 39.0266821712099 35.1307934330047  
39.3709357615493 45.9227107476843 38.3092241935352 36.131485826118  
39.0536056496869

LOC126536 42.442231667357 45.7317208802318 45.1569741609597  
45.8844325913247 45.5809132232681 43.0860383229288 42.2577689927563  
42.2577689927563 40.7847110517594 43.4885245598939 41.9908237694988  
34.9138625012006

LOC126661 54.0170817319522 46.0713306971594 46.6588655218735  
44.7980740332174 43.004943518025 40.5281496800812 41.706879587091  
42.8482181313226 45.1899271235974 44.3648993568405 48.7502645382856  
48.1627097465883

LOC126767 39.7576136507593 42.8542642792862 42.2577689927563  
36.6501141438378 42.9090346219023 44.1737502492846 42.357910063876

41.5464765641928 32.8704945047196 40.1179210534118 40.2649309204478  
37.9607839934735  
LOC126860 43.0930293831497 35.8227939208521 39.6451483836089  
34.4382958501338 40.2449343247539 38.7340969861754 39.6535880152834  
39.2672712041774 40.6957787921451 36.8059561571675 40.3452320167286  
42.9887069977696  
LOC127011 39.1590964332473 37.7384958256497 39.0775870687758  
37.8442841690502 43.004943518025 39.9397419279057 36.08956004634  
35.9023742468744 41.1742244762318 36.1550293353654 41.8168470823451  
41.7575097298927  
LOC127099 33.5994525227062 41.2598458726002 43.7630587657205  
38.745552403895 37.1565984182084 39.4953494583071 45.4799270968969  
44.797320243931 42.7150227340364 45.1569741609597 46.1673159982664  
38.5279745308203  
LOC127150 43.7585538437696 41.8848959280916 45.989212296035  
42.6913548400127 43.9450023643394 44.3648993568405 41.9393838138203  
43.4544762830742 44.1519466943185 40.6022003765153 41.3553369544097  
35.1451084093692  
LOC127295 728.679189702033 1154.6386362 1275.78715071615  
748.372940917543 1950.93175239958 1848.50311456636 851.108027634251  
925.486088550061 894.486674059951 1205.82775512007 1257.19844370057  
1141.25078954012  
LOC127406 40.148780650831 38.6414316877471 45.2313723727673  
42.9358255168086 43.844855336215 41.9543948167375 50.0088611244948  
39.7509165247419 38.4344387289956 43.2988017098387 41.6336636285875  
39.0536056496869  
LOC127602 44.0578434007778 42.38204124321 38.4387567303319  
44.1483976313959 42.1317134987795 40.8106586606106 42.2099119257029  
41.0995198212729 42.946438198925 42.2614524730856 42.5426057453993  
40.0103345774587  
LOC128102 44.9896851005259 40.5400384479766 38.7745734037492  
35.1451084093692 40.2449343247539 37.8102105794655 36.5352572191451  
32.229154316188 38.5252456306656 37.8217989841918 35.3362091871364  
36.9976231206067  
LOC128322 45.4799270968969 41.9894412416874 41.437237454134  
50.7046706880325 41.0885562160946 40.7616966228404 42.357910063876  
43.9366081640576 47.798305839406 45.7911932481722 45.6348103033479  
40.4639532172338  
LOC129870 37.6397652536077 43.0971787292711 43.6670755115848  
38.0958223740111 43.6587492470348 36.8059561571675 38.941855825269  
41.6466169548846 37.6383530120621 40.7063426028871 38.5668610487033  
45.8546719310325  
LOC130576 104.986694941968 222.957344929381 211.685526927495  
43.8002456102021 115.530384771495 47.7556758818053 187.462631817772  
181.772001042799 216.194306146777 216.358862796367 220.010492114456  
190.375732394043  
LOC130678 38.957687788868 42.1607322031054 37.5597671487621  
38.5252456306656 40.2449343247539 40.244271403831 44.6032218589199  
42.0494116081998 42.9020321355927 41.0057887014368 40.9157352260901  
44.2527566343661  
LOC130773 48.9906383294199 61.9753438182501 61.841867306916  
46.0228732507872 63.3638417360105 97.7114610828769 63.5738862549306  
64.3284163241986 70.178974380507 67.3308332069908 64.3032703931013  
83.6255924297514

LOC131055 47.2862299990938 42.9358255168086 41.528370959196  
37.9875302985336 39.4693871570028 38.2293008890613 40.0052661202207  
41.5464765641928 36.197424053556 42.6793753550854 37.9946685306274  
37.0953622406687

LOC131873 51.1740855632044 43.4396866157171 41.0356368374708  
37.4223289687135 38.4540849632254 44.5544727111028 37.830876898596  
37.6557714476853 41.6616444147804 45.1569741609597 40.9157352260901  
36.7762265039864

LOC132203 42.2455707947223 39.0102066700839 42.8270038153139  
47.481302504066 45.6895223823001 40.244271403831 45.3597029614942  
35.9023742468744 46.2027193115397 38.745552403895 41.8168470823451  
39.9519547348106

LOC132241 216.866451320811 154.386505379733 190.099949303905  
86.7823828209946 313.115027781064 74.2690269784394 135.169625016001  
136.125236142909 123.817018264773 235.925374041038 187.189412320761  
122.160438114932

LOC132706 46.0920218698606 43.4396866157171 39.9101908547397  
44.7980740332174 43.3332476888305 39.8455060654531 41.0381860307445  
41.2551966132486 41.7627910693483 42.3606390470387 40.0766543123257  
45.1735152121056

LOC132707 45.6517320730042 41.3610369241157 38.5045333213784  
49.1786207920603 42.4864576619427 38.5252456306656 51.7714254834195  
41.8417024632349 41.4636047919453 38.4187686307607 41.4508241771315  
46.5650556481721

LOC133185 49.3463416794995 46.3635803515159 38.8775560911841  
53.3967242431461 41.7929491793697 44.1737502492846 47.5963750520409  
46.695848687694 43.1805016690297 49.6203214143464 50.7159667633757  
48.6037684272115

LOC133491 44.8914371498528 35.8227939208521 40.931294690669  
36.9912468186322 42.0709558258414 44.3648993568405 44.7255207589606  
44.8997235283254 41.9635525160083 43.0919221375514 42.170702295259  
42.357910063876

LOC133609 43.7585538437696 37.4540772310118 41.8751578329365  
38.6414316877471 39.4693871570028 41.7627910693483 43.8206425661746  
38.6454098044474 41.5635499110307 42.0621425894624 39.5399188536544  
42.57175366709

LOC133874 43.844855336215 49.2050538150106 40.301483914446  
42.1273928203021 48.9627346956003 38.6414316877471 40.5585676679482  
42.357910063876 40.7847110517594 37.0320432433314 44.3763859390287  
38.0452862258803

LOC133993 39.1094280636983 40.8880530359822 41.4534762662066  
38.8495095797881 41.3440240757217 40.1846227436522 43.4544762830742  
42.6036491382658 44.2836121830547 42.0621425894624 43.4370048647278  
39.085216569009

LOC134121 41.0608773166058 40.8880530359822 40.1985790927248  
43.4410741327254 36.7356360093603 35.7034203372528 47.1345949868029  
43.6434576713809 41.2870505273664 39.6719190054379 42.8263096141654  
37.7526485343328

LOC134145 36.7356360093603 39.7835513496873 43.1931731665131  
36.7892997857376 42.0709558258414 39.8455060654531 42.9803717121865  
43.9366081640576 37.8319142847141 41.5435611403119 39.4410515050885  
39.6352613956998

LOC134466 45.5758521267508 39.1982470626863 42.640829914102  
35.8472302065546 34.2638875325204 39.7394181011603 42.9803717121865

39.6474008369935 42.8036731479932 42.4594149893798 42.4580504587581  
47.6040671292013  
LOC134541 42.3433931248155 40.9731067463382 38.5045333213784  
43.3078542962968 44.6834648302383 46.0364000143537 41.9393838138203  
43.844855336215 37.5469247328848 40.3235655331796 39.6403089864678  
40.9683275553869  
LOC134997 1375.14388134842 1319.32406112346 1120.83891847181  
871.238169066998 2306.14613042834 1117.26060212107 1362.12587130194  
1087.75682788799 2424.0414102425 619.337575854369 728.679189702033  
1273.52492984569  
LOC136143 121.613731804111 190.422737436225 177.261319004133  
113.248260252658 231.417150220669 245.585026913915 165.843728663632  
141.48637125542 256.071638089438 287.981727851442 271.50380898418  
188.272588632909  
LOC136157 42.2604978533738 42.3781558291981 37.4642807402741  
43.8002456102021 42.6022652963326 43.6960408897486 43.6753843488695  
42.4864576619427 44.2952004276566 41.7877325563821 42.4580504587581  
41.3012916486748  
LOC136242 42.0532901689036 47.9665737016961 41.6977706798234  
33.8111782249716 43.004943518025 39.4953494583071 37.2892641289258  
41.4508241771315 36.197424053556 44.6918600441328 38.079222289614  
38.9496515344837  
LOC136288 41.1523487516364 36.9994058279362 39.3709357615493  
40.3180310664156 38.5512429290626 42.9695585740813 38.1793598983615  
44.797320243931 44.7058233759912 35.93950183586 45.7328341667151  
38.745552403895  
LOC137107 51.2851682978581 48.6447083765118 53.9612654850046  
45.5869891570251 51.7983110178095 56.3525213736952 53.0277416531043  
50.1833483241864 51.0062122023297 51.0055825931636 53.6895401581575  
59.3709786862962  
LOC138652 39.8662795144616 40.0527893189096 33.281531405287  
40.4359177791566 42.7982502551634 39.3841861812262 41.706879587091  
37.5511560880902 42.9020321355927 40.5090849993014 39.2542963855807  
41.1554481567603  
LOC139046 35.1307934330047 39.6995529770239 34.0382693188794  
38.2041059863839 34.0927410219282 40.7616966228404 41.9393838138203  
35.4526946152955 36.6312676076142 38.0078357808393 40.1742127891824  
39.4490233720848  
LOC139116 43.6706764143908 40.8880530359822 44.2405728317107  
33.8111782249716 52.6922486991742 43.4681646416585 43.1931731665131  
40.7311497914871 46.581796165231 38.957687788868 39.0550139257658  
47.9566297250148  
LOC139363 39.0620487644635 41.8848959280916 44.1452943804044  
42.357910063876 39.0564222526273 38.6414316877471 44.2166118829877  
39.5466975353131 42.5406888281114 37.6383530120621 42.357910063876  
39.8497227447888  
LOC139542 43.9309845324767 39.6995529770239 44.696023817801  
40.1804147506786 34.9062568194127 47.0940613507321 45.4799270968969  
40.931294690669 45.0997987980157 35.2880714952489 41.5421429082231  
43.8575940017119  
LOC139587 44.436995101921 41.2598458726002 39.1799070031819  
39.066284740632 40.3452320167286 44.7804080899431 42.629412460409  
36.7460922671619 38.4344387289956 43.1839109702714 41.4508241771315  
40.7704587752083

LOC139735 47.6397712007919 37.5469247328848 39.6451483836089  
43.4410741327254 37.0526522140242 34.3887641786747 40.9157352260901  
40.831207953647 40.8970401536578 37.1275334308172 37.4642807402741  
39.7411455670172

LOC142937 46.0920218698606 42.8542642792862 41.8751578329365  
49.7350276169552 50.3713170502557 41.3553369544097 41.8315602975157  
44.2159020605784 40.2274522635576 38.3092241935352 43.0971787292711  
38.5279745308203

LOC143188 36.1232327599945 40.2493681589104 37.8386378737561  
34.3595588146954 38.9496515344837 32.9046688061235 39.8695929627783  
36.0306975524309 38.7298222155532 37.7315666632629 41.9083581529276  
39.8497227447888

LOC143543 56.7776874358774 63.2475738480323 65.1185966859561  
60.7148442408147 83.3905516293346 71.1607965028029 68.1833361806128  
71.2867274976738 68.2614370871382 72.961444366037 63.0043412964216  
64.4156641487994

LOC143666 86.8262463672891 63.5222607845861 66.603126065489  
97.2220312216969 63.0383605052305 67.2649356062263 85.8154958329408  
161.929470244265 69.3300058073438 66.5422130374814 56.3884556031093  
52.6922486991742

LOC143678 39.9697332660833 41.8073910693411 41.2365089689635  
43.074472921841 45.5809132232681 43.3785777889265 43.3262148375525  
40.931294690669 41.3803269429468 43.4885245598939 41.6336636285875  
43.9541718254769

LOC143941 43.2724556187214 45.4882438975269 41.8751578329365  
44.6905691366696 41.9842695818285 42.0574848021044 44.4639405506967  
43.2551508830106 39.9444191873552 41.6373771565199 41.2598458726002  
43.0930293831497

LOC144383 43.0930293831497 41.2598458726002 41.6079958749402  
45.5869891570251 43.844855336215 46.574682061365 44.3440839686558  
43.844855336215 41.2870505273664 39.9948390976317 41.9083581529276  
39.8497227447888

LOC144481 41.4508241771315 43.3458769998118 42.8270038153139  
42.2496337895968 38.6454098044474 37.9951997351435 46.7100796279384  
48.272324215504 39.7537274655115 52.8928296360463 56.0477607422828  
43.7672102682067

LOC144678 40.148780650831 33.1817617228171 38.9790184198145  
41.4273122914951 40.0599807618105 38.2293008890613 40.9157352260901  
42.6450179841129 41.863927676552 40.1179210534118 40.4504608195666  
39.1553169409075

LOC144776 45.1912496459517 42.1607322031054 45.989212296035  
53.8086134112366 47.8075998240396 43.3785777889265 41.8315602975157  
48.0582855095143 41.9635525160083 47.611018474151 41.9083581529276  
45.2783024981315

LOC144817 37.2474303302343 39.2907645923217 41.0356368374708  
33.4819739460148 36.5393857306744 38.2293008890613 38.8417151851134  
33.0038344711883 45.8325181856483 32.1260264272477 41.0050831223107  
37.5556299264699

LOC144983 43.1365648068674 45.5650849824985 44.7829632472754  
41.8778873678551 51.6353042936059 49.8472708021525 48.3996768970487  
41.3506832276112 44.9713479185144 44.858845220285 44.1642484298135  
46.7605647477028

LOC145783 42.5193208629123 42.8542642792862 47.9035532886869  
35.6027791404152 44.0451487108213 44.2607789091176 52.561573697155



45.3872406432794 51.5229124652769 46.441301934328 44.8872784170036  
42.0424641526302  
LOC145814 37.7384958256497 33.3069622728735 41.8751578329365  
44.4367387274922 44.9936360641969 41.2567470068038 44.9863726205428  
40.931294690669 38.2215591930186 42.3606390470387 40.6373400186325  
38.2350720635382  
LOC145820 42.442231667357 47.9128504683618 47.0940613507321  
47.8164193292842 47.4548471240051 50.0748292497578 50.6774883370457  
42.7431359850339 47.6195009345747 51.6778366958973 47.6884372645373  
46.3411353377615  
LOC145837 49.540449125788 43.0227387991135 42.7303139017786  
46.7577982595088 46.6397391251762 39.9397419279057 52.0942589368478  
46.1673159982664 44.5303781239209 45.9004543328976 45.6348103033479  
45.1735152121056  
LOC145845 41.1523487516364 40.9731067463382 42.157627240486  
47.6687908290818 40.4639532172338 39.3841861812262 48.4859552186772  
42.157627240486 46.8873421271259 42.5664883002833 45.9104478407175  
41.3481355128089  
LOC145853 171.770578381558 157.7623351008 84.5998418020787  
120.436827608155 338.475097952023 217.456127221867 230.633139180542  
119.362992523422 176.318618244066 118.244019427757 116.11290802164  
125.290426098227  
LOC146053 41.9407041937973 41.7337506166619 46.5650556481721  
47.481302504066 42.0709558258414 47.2927436772465 53.8687221233237  
47.3791873993182 46.8873421271259 48.8623729374733 45.1432412071268  
50.2163892855092  
LOC146177 44.1294459089314 42.0709558258414 46.4569566520107  
45.334106390212 41.6806984441849 47.3791873993182 47.8947595316832  
48.7814131120945 48.7358147030082 46.1390887492649 52.3761286517985  
47.2131144508464  
LOC146325 38.1169703906207 44.1239711172417 38.6005272730664  
34.7266486944713 45.1137938810047 40.5281496800812 41.1507980856436  
42.5435283762933 41.4636047919453 37.6383530120621 35.860430241131  
34.3409660445447  
LOC146439 84.2728210732532 127.043177339038 205.789533350801  
44.0451487108213 108.063001800611 53.2046867327331 112.60230393988  
112.021971795593 96.9051967257119 97.1201502245778 131.555833438345  
90.2425981161833  
LOC146517 208.410194427484 162.902264837659 206.791464145857  
179.897685693038 172.237164781821 185.563590013028 160.605530211736  
213.590067519021 153.626578526803 201.301705082976 171.176393131741  
189.164097331837  
LOC146909 38.5007204246293 40.0527893189096 46.4569566520107  
47.3574589211166 43.9450023643394 42.157627240486 45.8980298854198  
47.4740726032707 41.2870505273664 51.4454142248566 39.0550139257658  
43.0930293831497  
LOC147645 53.7507429765038 51.2405397507224 58.2251348002272  
51.5913529948887 47.2074332636566 43.2805590023412 58.3675164086197  
44.797320243931 51.9545473262296 53.1993028936883 48.8088340735921  
43.3744503319109  
LOC147650 46.263826584899 43.683792219729 49.2041300973417  
58.5406981871153 63.4753448572245 54.0382756991549 59.6780848951767  
47.3791873993182 47.3791873993182 50.5252048155459 51.1483696410762  
45.5800840647989

LOC147670 42.7150227340364 44.0409178714232 41.1367478979484  
46.614092935749 39.4693871570028 48.8744644207821 39.5496902678788  
40.047314525032 43.6670755115848 39.4710743516517 41.2598458726002  
41.1554481567603

LOC147710 39.6609238036815 38.7344853699576 41.6079958749402  
38.745552403895 39.2608760193011 42.5660695551615 38.2933870238743  
37.5511560880902 35.6139301508335 38.1042454705119 38.745552403895  
40.7704587752083

LOC147804 73.8374823243007 62.8885806455128 60.4809187893259  
70.506090074243 59.4830424460714 65.564930068976 64.4736987797413  
174.784373363036 58.7382738968248 53.8260140375214 55.0404566626821  
60.0940570991178

LOC147975 40.9558083259517 38.1312950900467 34.6977013306396  
40.3180310664156 35.3327761997046 37.8102105794655 36.7356360093603  
36.43924066428 34.5633623842083 33.2987269789328 34.266241549578  
34.0382693188794

LOC148003 44.7915315085948 46.9919960628953 46.3411353377615  
41.7614975630362 43.6587492470348 39.132725377815 34.806104801006  
39.5466975353131 46.0106098064475 45.0155543555707 46.4205654140754  
42.357910063876

LOC148137 51.9545473262296 56.6927078228789 69.6554376880691  
51.3851157261451 70.5676924620725 45.1873487463472 61.6544855697851  
54.2877981508636 52.6561576154021 44.8997235283254 51.0492389286271  
47.6040671292013

LOC148203 43.0001432913058 42.6939394537076 38.3166554965434  
43.8002456102021 39.7568367479301 45.4882438975269 39.1539892144371  
37.4484310268909 41.4636047919453 40.5090849993014 40.723990462047  
34.6720534245631

LOC148709 50.5670783769975 39.0102066700839 46.6588655218735  
42.9358255168086 52.4370718282084 41.4508241771315 59.6780848951767  
60.6706478075023 50.1603795873336 50.6486940895674 41.7272875295469  
44.1452943804044

LOC148766 38.0089018744739 41.6466169548846 36.2683886571585  
41.1886975241176 39.859345745831 34.8956628705329 32.8745892439217  
38.745552403895 34.1294694030979 36.8059561571675 39.3667161654772  
38.5279745308203

LOC148915 624.097858948785 996.520340280883 728.257836227637  
583.421166842011 1096.1705171588 1149.90692951795 1723.37649434054  
987.427672417105 1524.01520893763 467.645011859047 505.911881145656  
610.502562878788

LOC149069 40.4639532172338 39.1982470626863 43.6670755115848  
38.0958223740111 50.6470461863549 40.244271403831 42.1607322031054  
39.4710743516517 46.4164127487052 38.6454098044474 39.5399188536544  
39.1553169409075

LOC149086 40.7609952437622 44.4411734611229 43.401782064778  
40.5484717678957 46.8674366115656 42.5660695551615 43.3262148375525  
42.0494116081998 46.8873421271259 49.3000844711116 46.1673159982664  
39.1553169409075

LOC149134 173.745808259419 60.7495043977707 87.2316853416374  
47.0874209746031 65.1757400078647 51.294537308199 68.1125016199524  
101.028327489559 62.370559099758 89.6670947876322 67.1477341610979  
58.8188963227059

LOC149224 44.7915315085948 41.3610369241157 40.1985790927248  
41.0726336841311 46.0043807840705 46.7800033479223 43.0930293831497

44.0390019242862 42.357910063876 48.3693338695392 43.0016969050339  
44.3521099857368  
LOC149351 44.3355304829989 45.2556760873335 42.9104454767916  
42.4580504587581 44.4489662507893 49.2050538150106 45.8980298854198  
44.2159020605784 44.3440839686558 42.1622837416589 47.8988096575648  
44.4475838947656  
LOC149448 70.5096706089299 69.640968387662 81.5782824513693  
74.0093517743852 57.0504111569238 95.0738959950301 68.1125016199524  
82.9322141700549 70.8606919488782 143.563236821003 110.729504563799  
116.17375251898  
LOC149620 47.8249696958403 49.0697565324841 41.1367478979484  
43.5627649099623 39.4693871570028 37.7000400506818 39.8695929627783  
41.8417024632349 35.4332080966594 44.3648993568405 40.0766543123257  
43.3744503319109  
LOC149643 41.7397731376692 37.8217989841918 40.4882741869718  
35.8472302065546 43.004943518025 41.2567470068038 38.941855825269  
46.1673159982664 38.9006788676407 43.9450023643394 41.9083581529276  
38.4330755397458  
LOC149837 41.3387790895716 42.1607322031054 42.0621425894624  
42.2496337895968 39.9697332660833 39.9397419279057 47.4439407315335  
42.8482181313226 38.6322728994674 43.1839109702714 45.390192977585  
44.0451487108213  
LOC149950 49.1868644496737 45.0905928998779 44.696023817801  
45.0798408927912 49.7235523248653 45.8325181856483 38.2933870238743  
43.6434576713809 42.7150227340364 54.8979897528792 44.8872784170036  
43.6753843488695  
LOC150051 45.0985088502363 51.4413099192899 50.0748292497578  
49.9014504704021 55.6069214673486 46.1513019317765 88.1861828863404  
61.3077641493507 58.0722340887264 43.844855336215 45.390192977585  
46.917149434588  
LOC150207 43.1805016690297 41.554942319225 43.917817324545  
45.5869891570251 40.148780650831 37.2018803984555 41.4742337714895  
39.8016018354453 40.3662560853635 36.9102644736882 42.6776449468246  
42.1860813954352  
LOC150223 58.2902084992082 83.3322777515023 62.0967404944031  
60.7741670229412 79.0039595317374 51.294537308199 76.4889974392545  
55.9303347977781 68.1674425673171 41.8613406887824 49.319499137678  
50.3118072462443  
LOC150297 39.7576136507593 39.6995529770239 36.5474283500601  
39.066284740632 38.8456942580061 37.4782441311626 43.4544762830742  
39.6474008369935 39.4762546236449 36.6893251782922 40.6373400186325  
35.8429598823818  
LOC150356 40.5654775358427 38.4330755397458 40.5734458834617  
42.4580504587581 47.3172462673426 44.3648993568405 47.2927436772465  
44.1311654985682 71.6573554353691 74.4696354388511 56.4873776344986  
51.4968903591058  
LOC150383 43.5710871617107 39.6995529770239 44.5134109184888  
33.9645433044281 40.6723334103791 35.9305494063137 42.629412460409  
40.1474543172332 38.0213051227859 39.7835513496873 38.4689132737495  
40.4639532172338  
LOC150577 36.4564050256915 43.2649781354792 41.6977706798234  
36.890925044696 43.2484996523549 40.3357777530419 35.3362091871364  
36.7460922671619 41.863927676552 37.6383530120621 44.3763859390287  
33.0217499673686

LOC150759 40.4639532172338 42.8542642792862 46.2625470410195  
42.4580504587581 42.0709558258414 42.9695585740813 41.3594868055879  
40.2382908228517 40.0403898620771 46.325232414659 42.911855821602  
47.3992733452821

LOC150763 48.7213586071409 49.6203214143464 52.5353664902258  
48.9155368657318 47.6153629331146 49.7149784386993 52.8496345990125  
78.2975954230203 46.2718838939055 57.8585041080995 53.3078448066074  
48.6447083765118

LOC150786 40.6559419616644 36.0366673493555 39.2707964550441  
40.7481155008596 36.7356360093603 41.3553369544097 36.08956004634  
40.5158867964016 40.4220196471124 40.8049408996274 38.6662194645633  
36.6603338274678

LOC151121 40.6559419616644 40.716553247236 40.8420925848403  
34.8137085420423 39.5595233162192 40.9506062495231 38.2933870238743  
46.3685439301234 37.1820543575123 38.3092241935352 40.9157352260901  
41.2437378488025

LOC151234 42.442231667357 36.5219488315447 46.0727230219512  
41.6564075217517 43.5544347011646 40.650742261428 37.9430145836712  
41.7419877611072 45.8325181856483 41.8613406887824 42.911855821602  
41.3481355128089

LOC151579 279.782392390288 206.450109223116 207.342732103088  
225.589127792587 190.161505611036 262.779883562966 143.152895211088  
260.093838596699 306.895449954881 145.676955166566 156.220155161711  
278.850071205987

LOC152024 38.5007204246293 39.2907645923217 41.0356368374708  
45.8844325913247 45.4751076037511 44.3648993568405 45.6042625176633  
42.7431359850339 37.7384958256497 41.9666541498638 40.4504608195666  
39.2469742642337

LOC152084 44.8914371498528 43.0971787292711 45.2313723727673  
41.0726336841311 51.7983110178095 40.4359177791566 41.9393838138203  
42.357910063876 42.1594905198929 44.2580151149956 39.0550139257658  
43.2776458914333

LOC152118 44.7915315085948 46.6996902348633 42.7303139017786  
40.9607305725196 48.1473938886239 48.260931742163 45.6042625176633  
44.4031868028216 47.0804681460898 51.3351387089044 49.0361180089431  
39.8497227447888

LOC152195 47.9175508887533 58.5406981871153 73.1262465119304  
61.3747706295648 114.093655272795 48.7781962164988 60.9648845690177  
57.9713749600418 63.2753814090696 58.2818491355907 57.0690683036183  
61.356483470053

LOC152578 42.3433931248155 45.2556760873335 42.640829914102  
39.3750969348308 47.9128504683618 48.260931742163 45.1017494688414  
44.5029690493211 42.5406888281114 42.3606390470387 48.6184776976167  
48.0350549043063

LOC152586 36.8072833828297 38.5252456306656 36.9795961564828  
38.3166554965434 37.4470183315826 35.2067831864574 32.4466419672036  
34.5886782974123 33.3643994200057 35.8304004211528 33.8558232866797  
37.2810767789306

LOC152663 36.7356360093603 37.8217989841918 41.6977706798234  
41.5464765641928 36.2048942610546 40.9506062495231 42.357910063876  
39.7509165247419 43.7630587657205 35.0668743708816 41.1638563416981  
42.7782216342806

LOC152667 38.2496050953547 38.4757888225478 39.4250105372135  
36.9376982271148 41.3755760434934 37.9003288112261 41.5464765641928

39.6995529770239 36.4230785068878 37.3179578037963 36.3390947880186  
35.2448979801094  
LOC152742 43.0930293831497 44.3529919625344 43.1931731665131  
43.5627649099623 41.5668884168669 39.0266821712099 45.3597029614942  
38.2782436497441 42.4540072551568 41.9666541498638 36.5359455830388  
43.8575940017119  
LOC153328 46.441301934328 43.683792219729 41.7419877611072  
44.6131679221578 45.2556760873335 49.2050538150106 41.5817737564592  
45.7003272484265 45.0017158586743 46.5650556481721 45.6348103033479  
46.8840006833906  
LOC153364 44.1737502492846 47.015085768072 49.1067959632109  
44.0991023527481 41.5668884168669 53.0563786095807 40.6216891610774  
42.6913548400127 49.7942306972014 57.6791750431251 52.7466456080101  
49.9692385479389  
LOC153561 102.25509551881 133.074560812703 123.321810678947  
219.555240189863 82.6709662235238 104.587564056763 77.0774476767901  
79.2911825016824 105.140085606412 151.030500297499 158.17598244564  
110.036754099036  
LOC153684 45.0985088502363 49.4067286971348 50.3950981988762  
43.5627649099623 44.3557408297309 44.8872784170036 55.8019623191927  
37.5511560880902 55.7522234735038 53.9412154719864 61.0979269700412  
44.5432192783161  
LOC154449 35.9305494063137 43.8495248991589 46.5650556481721  
45.4634652319753 37.2567512265363 40.5281496800812 36.9355798143571  
45.2806199505029 44.5303781239209 43.2988017098387 39.2542963855807  
39.8497227447888  
LOC154872 39.5676051939342 39.6995529770239 38.3166554965434  
35.314469458379 41.8806343997257 34.8956628705329 37.0564573649223  
36.0306975524309 40.9901805728485 39.6719190054379 37.92304440150891  
37.0953622406687  
LOC154907 35.0202257459026 36.3110701990588 40.7620472083159  
37.8442841690502 37.1565984182084 33.0463640202858 38.5066108855005  
41.7419877611072 31.859589438824 34.4875013487777 36.3390947880186  
37.6557714476853  
LOC155060 49.4151347850687 53.6429962450784 49.3780606970538  
51.5913529948887 54.1225249245036 53.0290605707162 60.9648845690177  
44.0390019242862 54.0192060888782 62.2025996860055 53.3078448066074  
51.6660481331154  
LOC155100 45.7700386532539 40.8476436931481 44.4652605017595  
43.2551508830106 43.1252272136667 42.750861693377 47.1345949868029  
45.3872406432794 41.3803269429468 41.8613406887824 41.2598458726002  
40.2237056928605  
LOC158160 73.0970339739187 67.3519071522322 83.1874704625702  
62.1776700757427 57.2960245538881 42.750861693377 75.0665411373616  
64.6316818494785 77.4186160113063 76.3583555666815 83.1184264089873  
77.1954301283261  
LOC158257 45.7356815244513 45.9266745571724 50.0748292497578  
44.6905691366696 47.6884372645373 43.9724628401189 43.9450023643394  
42.7431359850339 45.8325181856483 45.0155543555707 41.9908237694988  
48.0350549043063  
LOC158301 145.30915313164 78.6705291023488 73.6323065529916  
119.015431849218 94.3450965454031 66.0069448981947 111.367789538268  
197.776069056927 69.5193254473883 172.65049903872 180.994353525666  
144.500148287951

LOC158318 46.6348258763289 45.1694246393676 44.4311655729487  
47.8164193292842 54.4586176399381 39.0266821712099 44.6032218589199  
43.9366081640576 51.2066664465185 42.785429206422 43.844855336215  
39.1553169409075

LOC158345 413.31638457585 869.879392791086 452.2453761868  
362.268767190535 799.803676957263 1375.14388134842 382.312820492386  
382.190644764853 634.514100741768 484.651969259966 835.171475474151  
1030.31910195147

LOC158376 49.540449125788 47.2055133646385 51.3268475761593  
42.2496337895968 47.4548471240051 42.2577689927563 48.6395795163502  
43.844855336215 37.4540772310118 39.3698811593364 46.2560238004757  
43.9541718254769

LOC158381 42.6036491382658 43.3458769998118 42.3536549114165  
42.4580504587581 47.5647821785529 46.8954576545929 42.7431359850339  
45.2806199505029 48.2123120250343 48.4890615340603 45.7328341667151  
48.4535991392809

LOC158572 42.2455707947223 36.89524015739 47.2055133646385  
43.5627649099623 42.3685136297603 45.1873487463472 53.7423898357583  
59.8760452220989 51.0062122023297 46.0119912782855 48.3847843498476  
42.57175366709

LOC158730 37.8386378737561 41.0678614026819 37.0642268327439  
38.745552403895 40.7779767565889 46.574682061365 39.7576136507593  
36.6452480995946 35.4332080966594 42.4594149893798 36.6298807161755  
41.2437378488025

LOC158825 42.8036731479932 38.8336427948187 46.7508829977587  
42.9358255168086 38.0598374201407 44.0804700754786 38.8417151851134  
45.0972184964705 42.9020321355927 45.9004543328976 46.7386599624801  
43.5738557773903

LOC158830 38.5648843914189 41.554942319225 40.5734458834617  
36.5393857306744 32.4181238410234 37.9951997351435 36.8369172900902  
42.9301944191913 36.0741672064298 42.5664883002833 39.4410515050885  
38.2350720635382

LOC161527 53.7507429765038 53.0383634135393 61.841867306916  
61.2213001749372 60.0736861987141 54.0382756991549 56.4809146784765  
67.8061298261394 59.6700171760426 55.3153799233744 59.5830868881343  
58.6481644777552

LOC162073 46.5549623118323 58.7111274254142 54.2670850492947  
56.4578213622965 40.8873907150245 46.3715909653832 53.4921736109774  
46.0633179231318 49.1940901905636 48.1392888470269 51.3103617600342  
54.7953298048942

LOC163233 48.1952521496489 46.0023068797812 43.8495248991589  
47.9915414951747 40.5235471987417 45.3233134695905 47.7390230243778  
59.3923286524971 42.8036731479932 46.6598879466655 45.6706505553383  
50.2471139112912

LOC164380 37.1485601150873 33.5924201549249 34.9849896310235  
36.3604951341921 33.7494761745342 30.8824580894159 36.08956004634  
36.0306975524309 33.6288663955758 39.3698811593364 36.7283081422707  
34.9138625012006

LOC165186 34.1336988442837 44.9370339275041 38.1421709520616  
39.2780515621926 41.9842695818285 32.9046688061235 37.7136011474903  
39.7509165247419 40.0403898620771 32.7876527533679 44.6286581923295  
42.57175366709

LOC168474 42.2455707947223 45.4143854024453 41.785676764591  
41.8778873678551 46.8674366115656 45.0882356578404 44.6032218589199

45.642304356051 45.8325181856483 41.4397539024976 33.7948557837079  
40.8681871019812  
LOC169834 38.6454098044474 43.683792219729 44.1452943804044  
41.5464765641928 45.2556760873335 41.3553369544097 39.2533668167483  
38.2782436497441 39.1790517315259 38.2069499294002 37.9230440150891  
42.8864415494484  
LOC196120 43.5710871617107 43.8495248991589 45.4865173433646  
49.1786207920603 50.3713170502557 37.8102105794655 39.7576136507593  
38.956280281655 41.6616444147804 37.7315666632629 41.0808257270221  
36.9976231206067  
LOC196549 64.0759817636265 57.9509155144056 76.5699943825825  
60.9379216295576 121.354667375673 56.6172748471831 137.335224748204  
40.931294690669 162.202548351392 151.912182086236 123.868848519181  
137.744037647063  
LOC196752 60.1705241170421 67.4811066936124 62.4683876804812  
74.6159297822533 66.1650385535549 49.8472708021525 65.2361525412756  
58.676230030835 60.5608545741456 89.3989848564067 74.9006142438341  
60.7495043977707  
LOC196913 39.266565827316 36.9994058279362 29.745266251498  
42.2496337895968 33.7494761745342 37.8102105794655 39.3585350448719  
34.806104801006 34.8552366193358 36.3612409063792 38.079222289614  
33.4316681623175  
LOC196993 39.3709357615493 41.6466169548846 37.9482157381008  
37.651298468202 39.1650142708257 42.157627240486 44.4639405506967  
41.8417024632349 42.2577689927563 44.4652605017595 39.8184668132023  
39.4490233720848  
LOC197135 42.3433931248155 46.29198852834 53.7792717770978  
69.8314582428552 44.2607789091176 44.7804080899431 39.4600924554505  
45.3872406432794 42.2577689927563 42.785429206422 46.972521499515  
43.3744503319109  
LOC197350 47.3791873993182 36.9994058279362 47.3861758958576  
37.8442841690502 37.4470183315826 41.4508241771315 39.0458123429605  
47.0940613507321 45.5779686360641 42.8936990772838 42.357910063876  
43.7672102682067  
LOC198437 61.4884606677516 41.0678614026819 46.8267540220952  
42.6913548400127 48.1473938886239 37.7000400506818 35.3362091871364  
41.7419877611072 40.4220196471124 43.2988017098387 35.4386677371439  
39.0536056496869  
LOC199800 58.1027665533767 121.542387231625 114.979124960177  
67.0402749076279 85.4420599474339 129.299077627671 75.8779316255794  
66.8364940429355 126.930102684077 64.1097859982912 86.2670415958076  
62.2025996860055  
LOC199882 43.1805016690297 40.2493681589104 39.2707964550441  
36.5393857306744 41.2740822675592 39.3841861812262 42.629412460409  
44.4031868028216 38.5252456306656 38.2069499294002 39.0550139257658  
41.4508241771315  
LOC199897 37.8386378737561 32.6416008433981 33.0260566875355  
34.6468794865286 36.3390947880186 35.314469458379 34.0777108441756  
41.8417024632349 34.8552366193358 35.7202909649682 35.3362091871364  
37.2810767789306  
LOC200261 41.9407041937973 41.2598458726002 45.310660704531  
49.5424425850549 40.0599807618105 42.8598805316863 40.6750540874299  
40.3357777530419 45.5779686360641 39.7835513496873 39.7342718293432  
41.6550823405646

LOC200420 43.2724556187214 39.5050383901884 44.696023817801  
42.2496337895968 43.1252272136667 39.132725377815 44.4639405506967  
37.1317006162938 46.581796165231 57.0581769379589 41.4508241771315  
40.3691324547049

LOC200493 39.9697332660833 38.6414316877471 41.3366779545815  
41.5464765641928 43.004943518025 44.9896851005259 40.0052661202207  
43.9366081640576 38.4344387289956 46.441301934328 39.2542963855807  
39.0536056496869

LOC200726 36.6480005877129 38.6414316877471 41.528370959196  
44.1483976313959 35.1411239266238 41.2567470068038 46.8613212048981  
41.5464765641928 40.8970401536578 40.2112371512838 43.1931731665131  
45.0035308952466

LOC200810 151.344720108793 242.236207196941 247.612180415367  
46.3203995372658 162.833785414988 67.8208976798364 206.41879845205  
114.113460279317 317.483708873867 320.038347979923 191.141778714144  
223.826005691932

LOC201140 38.7537364570873 41.6466169548846 42.4580504587581  
48.4916117779992 41.2740822675592 40.5281496800812 45.7452456977857  
41.8417024632349 42.8036731479932 41.6373771565199 43.401782064778  
42.6758568421347

LOC201164 48.4849194706125 46.6996902348633 42.0621425894624  
52.6947911480086 68.5888253504788 52.4351670989268 43.3262148375525  
49.3880946790306 43.2761454096265 49.7259371799014 53.3078448066074  
47.5025821041537

LOC201175 47.4678477186801 67.1299518044849 58.9135553403521  
70.8835636550472 47.4548471240051 38.6414316877471 92.8579489575841  
62.6984594468418 92.1817062395346 48.7414853386615 64.830448408529  
43.8575940017119

LOC201229 49.6751542251638 46.4091752823403 46.2625470410195  
45.0017158586743 47.3791873993182 69.1523164481201 52.561573697155  
61.1926647158574 53.3094843669564 77.4578596822431 76.2226219333049  
54.720204938924

LOC201725 53.4921736109774 50.6229884142872 47.0055981216687  
41.5464765641928 66.3075095149783 54.9108046955355 72.1401612718245  
52.8622615027833 62.9922928277769 54.0374522273907 47.6125796208753  
53.840976437122

LOC202051 43.4626049853157 46.5650556481721 49.5424425850549  
43.4410741327254 51.0107745412152 52.2089306840125 41.8315602975157  
44.1311654985682 50.5785738734431 41.2276963324981 48.8088340735921  
57.934622029119

LOC202134 42.7635040180321 41.3226031588834 39.859345745831  
42.0593485979781 42.5423928071882 42.1953282355775 41.6410858691518  
42.6047558559206 39.1524641997368 45.4832649509218 44.4303900854982  
48.7378248193346

LOC202181 40.6062943725118 41.5132248356707 43.2721716572958  
42.281606728072 41.6340461942423 41.0582900711341 40.1235656101329  
51.555506218204 42.7671420440641 42.4594149893798 46.824299585607  
43.3744503319109

LOC202459 43.5710871617107 32.8881500803623 39.9101908547397  
42.4580504587581 46.6397391251762 44.4619248757502 42.357910063876  
43.1567024035183 43.7630587657205 46.325232414659 41.9908237694988  
38.745552403895

LOC203235 41.2424637338424 35.8227939208521 38.2280071951674  
34.2080003860523 42.6022652963326 34.1806289878747 44.2166118829877



36.7460922671619 40.8970401536578 38.528621456378 34.5633623842083  
34.0382693188794  
LOC203510 44.1294459089314 41.9894412416874 42.157627240486  
42.4580504587581 39.2608760193011 41.2567470068038 41.4742337714895  
41.2551966132486 38.5252456306656 42.6793753550854 43.5710871617107  
40.8681871019812  
LOC203547 299.524171071613 373.802562320876 288.065258507995  
279.485290822376 756.801598119483 353.463970335835 247.511892014861  
304.577891085373 445.875994521817 647.044821320392 500.313640131475  
374.723141438448  
LOC205251 104.059057437473 85.3754356809649 86.9924799927707  
95.5022104475922 91.2681347227088 186.54041506387 116.434267173815  
88.2568398791731 150.480087842118 97.2865629929716 132.007307754378  
114.321083441061  
LOC206227 38.957687788868 42.5269793679335 43.4709415392696  
41.1886975241176 40.6723334103791 44.3648993568405 42.7431359850339  
37.2237132058632 40.8970401536578 44.6918600441328 35.5179217192467  
40.9683275553869  
LOC220115 40.2209794935386 41.6799375298398 42.640829914102  
41.0726336841311 42.3550738181144 39.9871741554388 39.6108118077732  
41.3962888656479 41.9635525160083 40.769767732912 43.3085358214154  
41.8264657291934  
LOC220416 35.6111578834671 43.683792219729 44.2405728317107  
36.890925044696 37.0526522140242 38.5252456306656 40.7910160811527  
42.157627240486 39.1790517315259 37.2089297656361 40.9157352260901  
38.2350720635382  
LOC220429 40.5654775358427 41.2598458726002 36.9795961564828  
44.0451487108213 45.5809132232681 41.9543948167375 43.4544762830742  
40.1474543172332 42.992884918158 40.3235655331796 45.390192977585  
36.2582325396375  
LOC220433 197.171449112363 156.433762355183 183.918927595056  
191.291480830946 170.644636226884 256.426184741007 195.765247956108  
321.069136463599 228.328635242684 408.991719312986 383.966991071954  
364.962649416567  
LOC220594 30.493888765264 36.2103905554984 35.4484652445078  
38.5252456306656 32.771863438151 39.132725377815 34.5633623842083  
34.064698871541 41.9635525160083 32.7876527533679 35.046946054314  
37.4554876386402  
LOC220686 127.232160404726 308.64836180781 90.3485862002091  
121.423421895502 218.552143403657 125.934747056908 171.238235624104  
145.630337418553 126.826715174564 90.4957279507369 99.1952492360239  
87.3429006429216  
LOC220729 48.1952521496489 50.0642388903563 54.1637401903523  
43.0016969050339 50.3713170502557 45.0283997415478 47.5963750520409  
50.5070012045444 44.5678064264717 46.5650556481721 50.5381435455868  
52.4351670989268  
LOC220998 39.8662795144616 39.6123051184545 40.6737160001291  
38.2041059863839 41.5668884168669 37.3799542961839 40.2154497375715  
38.3684202018524 32.4931776430014 38.745552403895 37.3687900733549  
37.0953622406687  
LOC221091 48.0201377454632 45.3486182278177 41.9666541498638  
41.8778873678551 43.844855336215 50.0748292497578 43.0930293831497  
44.293922970134 38.4344387289956 47.7180816682562 48.042366934301  
38.4330755397458

LOC221136 44.8914371498528 47.1332119496722 51.4308501933893  
45.5869891570251 47.2074332636566 44.8872784170036 51.7714254834195  
49.7309743973184 41.863927676552 48.7414853386615 47.3791873993182  
50.8442982601142  
LOC221442 128.717988447086 116.51037006692 83.764882413379  
98.5663841503803 63.25187762908 52.9482338979681 82.6381941930783  
59.3164315859919 58.7382738968248 82.475816811779 71.8314470868658  
72.1090339831747  
LOC221710 110.362432903746 68.1969125201241 69.4047473173218  
90.5216273844682 134.83544047809 62.1857038870283 62.1970616836737  
135.361059757705 98.3798838151482 48.4890615340603 50.3221380889396  
67.4197263416701  
LOC221981 43.632365631458 45.1694246393676 46.7508829977587  
46.0228732507872 45.3675390992851 46.6397391251762 43.8835874380262  
45.3389970694851 42.7150227340364 42.8936990772838 42.2510526338368  
45.4799270968969  
LOC222699 62.3042205863409 44.1239711172417 41.0356368374708  
41.4273122914951 47.9128504683618 43.4681646416585 54.339958888486  
50.5070012045444 46.4164127487052 39.2623423164488 39.4410515050885  
38.3291713594599  
LOC222967 43.1267841876606 39.5573415356949 39.1426882884476  
43.6025443656008 45.5198200633333 43.1358833499227 42.4558047733126  
41.7419877611072 42.589641010388 45.4820135714118 44.6834648302383  
43.4290452504928  
LOC23117 267.85990321012 218.217851814655 349.589955244523  
341.97050042695 298.924873508403 154.811704749343 188.670053901101  
454.02808608679 141.808284719109 464.495132469257 339.679549262298  
235.962209790392  
LOC253573 41.1523487516364 38.4330755397458 38.6727842796202  
38.5252456306656 45.8051846088552 35.5158505219112 40.1235656101329  
38.5457716679071 41.2870505273664 42.1622837416589 37.2892641289258  
37.8490162439785  
LOC253724 38.7537364570873 41.2176232897704 37.9030782766955  
40.0337926471478 36.2676760101215 40.6994262313917 39.2114264935239  
38.3684202018524 40.4220196471124 37.920964499903 38.3153619981548  
43.0930293831497  
LOC253820 41.2424637338424 45.7317208802318 42.8270038153139  
46.3203995372658 43.844855336215 41.9543948167375 44.7255207589606  
40.5158867964016 43.7630587657205 36.6893251782922 42.4580504587581  
41.1554481567603  
LOC254028 42.9104454767916 40.2493681589104 41.3366779545815  
51.223859150798 37.2567512265363 45.6129956328415 43.0930293831497  
40.2382908228517 46.0106098064475 49.0841460667818 44.7114813656401  
40.7704587752083  
LOC254312 46.3390850717989 48.8584917918986 41.1367478979484  
37.9875302985336 44.9936360641969 40.244271403831 42.7431359850339  
43.3262148375525 41.1742244762318 41.8613406887824 45.4799270968969  
44.0451487108213  
LOC254398 42.0532901689036 42.8542642792862 38.9790184198145  
46.7577982595088 39.4693871570028 40.5281496800812 48.8319884367456  
54.720204938924 45.0017158586743 47.7180816682562 44.2142581488029  
47.7962548556026  
LOC254559 51.7607563002005 43.2649781354792 46.9040704638073  
36.7892997857376 42.0709558258414 43.5752393599169 41.3594868055879

41.3506832276112 35.860430241131 44.2580151149956 42.6366765186182  
42.7782216342806  
LOC255025 40.6559419616644 42.3550738181144 39.1799070031819  
32.554751989205 41.1868052124344 41.4508241771315 43.3262148375525  
38.2782436497441 39.9444191873552 40.4136535208406 38.956280281655  
39.2469742642337  
LOC255130 39.7576136507593 43.9421822132391 38.8775560911841  
54.2886483704949 42.0709558258414 41.0582900711341 43.6753843488695  
37.33030683349 38.9834959368496 41.1222709786153 43.3085358214154  
37.8490162439785  
LOC255187 42.8036731479932 42.0709558258414 36.5474283500601  
43.1847628331565 38.5512429290626 42.157627240486 46.7100796279384  
44.4031868028216 36.7267557061938 41.3321861371202 41.4508241771315  
35.3525469364579  
LOC255275 40.0557788909923 37.1685072112618 37.7000400506818  
35.314469458379 40.2449343247539 33.6859433472087 35.9350286877524  
38.9074189954657 37.8319142847141 36.9848592422398 41.5421429082231  
36.9060997041453  
LOC255313 44.7915315085948 44.3529919625344 40.5734458834617  
40.646702696033 37.956732373465 39.7394181011603 41.1507980856436  
41.9315419791594 39.0775870687758 37.7315666632629 45.6348103033479  
41.9430737035925  
LOC255326 51.8781065691038 58.2571968311834 85.9692990407066  
67.0402749076279 54.802736966312 50.6360662655392 53.7423898357583  
49.3880946790306 69.5193254473883 45.6868589181768 54.9765783642973  
51.9447450229707  
LOC255374 45.0985088502363 43.0971787292711 41.6977706798234  
41.8778873678551 41.0885562160946 44.8872784170036 42.9803717121865  
38.5457716679071 55.9423752286714 46.8954576545929 47.7535797917441  
49.0655215909632  
LOC255411 34.0467249875782 39.2907645923217 41.437237454134  
39.5050383901884 37.8679241954337 42.4580504587581 40.1235656101329  
47.0940613507321 43.4656637536244 39.9948390976317 46.1673159982664  
37.0953622406687  
LOC255620 49.7350276169552 68.7436392042714 57.3697604614404  
65.2001674269291 49.32293280121 45.9266745571724 69.779139490544  
53.6887223745125 65.3672880026114 59.1040441894478 55.3942006156899  
51.6046415904452  
LOC255649 42.3433931248155 39.6123051184545 38.4043916290561  
37.0732977341185 40.0145811166794 42.0847226073592 42.4939802311136  
45.063792968927 38.6322728994674 40.3458948319669 41.4860822396574  
39.8497227447888  
LOC255783 434.060745987869 285.511923726609 367.931222555457  
307.922754395377 365.723799716137 718.832367050609 280.680953068339  
157.543887960599 380.736562250846 315.960715273629 331.001195453225  
277.325795311848  
LOC255809 46.1673159982664 45.7317208802318 52.9111155236961  
109.503117647487 45.4751076037511 49.7458652239071 60.6548851977964  
44.9977782988116 45.9227107476843 44.4652605017595 49.319499137678  
50.8442982601142  
LOC256223 40.3478825593224 44.9370339275041 49.1067959632109  
44.265834798964 41.9842695818285 39.2985791324641 42.357910063876  
39.0620487644635 47.6195009345747 39.4710743516517 38.745552403895  
41.863927676552

LOC256374 37.9387791625384 39.6123051184545 40.5734458834617  
35.8472302065546 37.2567512265363 37.4782441311626 37.830876898596  
33.8558232866797 36.6312676076142 40.2112371512838 39.7342718293432  
38.1421709520616  
LOC256483 43.0930293831497 38.9338521051669 44.6032218589199  
35.1451084093692 42.9090346219023 45.7300501624017 40.0052661202207  
41.5464765641928 42.992884918158 39.8873706855774 43.4709415392696  
39.4490233720848  
LOC257358 44.436995101921 34.5023764006976 42.4580504587581  
67.0402749076279 41.3755760434934 38.4330755397458 38.1793598983615  
38.8495095797881 39.5806465938526 41.5435611403119 43.0016969050339  
39.0536056496869  
LOC26010 610.853753376105 1102.03940742413 1029.12917222294  
227.817928402227 338.164006403 354.973265582488 701.935442033195  
310.860910973626 532.35007819883 330.391945158969 406.33528162722  
522.377154567257  
LOC260339 40.3478825593224 41.3610369241157 40.7910160811527  
44.0451487108213 41.467005949568 41.408887993053 40.7910160811527  
45.9104478407175 42.4540072551568 44.4294261786154 43.844855336215  
43.1235886043549  
LOC260340 39.6609238036815 39.8695929627783 39.3709357615493  
37.0732977341185 46.0977687311222 37.5887129572848 40.1235656101329  
38.6454098044474 41.7627910693483 39.1621898366355 36.7283081422707  
41.1554481567603  
LOC283029 43.0001432913058 35.2143190355414 44.7829632472754  
37.1894304543751 42.6022652963326 47.0940613507321 48.1747307200218  
46.1673159982664 43.5669306063196 42.3606390470387 46.5650556481721  
42.0424641526302  
LOC283050 67.1387898740161 47.8400694856726 53.4088637045445  
115.132600341395 42.4864576619427 45.4882438975269 46.1634822993009  
48.87875862356 41.9635525160083 51.2318935933116 48.1352470945488  
47.1060577218993  
LOC283104 45.0985088502363 40.0527893189096 49.2041300973417  
49.7350276169552 49.0828761839116 42.5660695551615 40.9157352260901  
41.5464765641928 39.6609238036815 50.5252048155459 38.079222289614  
42.357910063876  
LOC283116 36.4230785068878 43.1464706017434 41.2679739649179  
38.9534635879195 44.2607789091176 43.2805590023412 46.0817481577316  
41.3506832276112 40.0870341983328 44.2580151149956 40.6723334103791  
41.5961238651523  
LOC283152 44.6231541342 43.0971787292711 43.7630587657205  
40.8681871019812 42.7982502551634 45.6129956328415 45.3597029614942  
44.6107027295193 41.9635525160083 40.8970401536578 40.6373400186325  
42.6758568421347  
LOC283157 42.7150227340364 43.7644428186265 46.7508829977587  
47.6687908290818 39.7568367479301 39.4953494583071 39.5496902678788  
43.1567024035183 40.137818555383 44.0409178714232 42.357910063876  
41.2437378488025  
LOC283174 44.7915315085948 50.4022543872993 49.6347864008749  
45.7397504535169 43.2484996523549 71.9329028989527 40.3302268293707  
47.6952179922944 49.5539622682049 58.115198353247 66.6788758487969  
50.0571060701893  
LOC283202 42.1537476443423 41.3610369241157 38.0057289062111  
41.7614975630362 39.512606833112 42.750861693377 42.0605906240248

40.7799172560245 41.9097689475185 41.2276963324981 40.9157352260901  
41.6550823405646  
LOC283278 35.8208542506595 59.9682734755814 43.0016969050339  
34.8137085420423 42.1650127805175 35.2067831864574 42.2577689927563  
36.9355798143571 44.5303781239209 37.3179578037963 35.2339574411711  
38.3291713594599  
LOC283340 39.1590964332473 39.3999056968598 40.1985790927248  
40.5484717678957 39.7568367479301 38.9378717994178 39.8695929627783  
40.1474543172332 37.3600014814388 37.6383530120621 42.170702295259  
43.2776458914333  
LOC283392 43.5710871617107 47.9665737016961 52.4485219671976  
47.8164193292842 48.6224651100733 46.1513019317765 54.6414321010929  
53.3094843669564 42.2577689927563 41.8613406887824 44.2142581488029  
41.3481355128089  
LOC283398 45.6517320730042 42.4493032770053 44.2405728317107  
43.1847628331565 46.6397391251762 43.0860383229288 46.3057385979341  
48.0582855095143 47.0804681460898 45.7911932481722 46.4205654140754  
44.4475838947656  
LOC283412 264.975481501401 462.234151352018 496.163796158189  
334.093449847539 996.520340280883 886.397061577531 420.887443967987  
286.497342437243 406.417924060562 508.278222733886 510.82619253142  
696.113365766871  
LOC283432 33.8558232866797 38.4330755397458 33.281531405287  
33.8111782249716 36.6354013629791 39.7394181011603 34.806104801006  
35.1738399826814 34.6720534245631 29.2731027042641 32.5482839399637  
33.8196020406676  
LOC283440 37.6397652536077 43.7644428186265 45.1569741609597  
42.2496337895968 44.4489662507893 38.5252456306656 42.9803717121865  
39.5466975353131 42.5406888281114 44.3648993568405 39.153226699662  
45.9693232070002  
LOC283487 46.1673159982664 45.5842286511645 47.646800205189  
45.7397504535169 48.2748123114598 43.9724628401189 51.4349390827895  
47.4740726032707 57.4777075615651 52.0999467564713 44.7926323492519  
46.8129509799753  
LOC283514 43.9309845324767 41.1212129940704 38.5442780220289  
39.2780515621926 42.3536549114165 42.5660695551615 43.0269218496197  
39.2672712041774 40.3662560853635 39.1832968442811 38.5252456306656  
41.5961238651523  
LOC283547 41.4508241771315 46.3635803515159 47.7737810047679  
54.4586176399381 46.3150221024046 44.2607789091176 45.223075311113  
44.293922970134 44.0519245668737 44.8997235283254 39.6403089864678  
43.2776458914333  
LOC283551 37.55264801907 43.683792219729 39.0775870687758  
43.074472921841 38.5512429290626 44.5544727111028 38.2933870238743  
43.6434576713809 37.5469247328848 38.3092241935352 37.3687900733549  
36.7762265039864  
LOC283553 38.0089018744739 43.5873188565519 47.2962360458401  
39.2780515621926 46.1804647841331 37.2686490268265 37.7136011474903  
42.2577689927563 50.3245489035833 45.2556760873335 47.0110068985119  
44.0451487108213  
LOC283584 38.2083710281545 43.8495248991589 38.5045333213784  
44.4367387274922 43.1252272136667 46.4648868771662 44.9863726205428  
41.0381860307445 41.7627910693483 40.4136535208406 44.1148826235374  
45.5800840647989

LOC283585 42.442231667357 41.9894412416874 43.3085358214154  
42.2496337895968 41.7929491793697 41.6590564937735 51.0013344286851  
42.9301944191913 40.4997186069494 41.7405682794166 42.0750889188255  
42.1537476443423

LOC283682 38.1169703906207 37.10170285405 39.2707964550441  
46.0228732507872 35.4484652445078 45.8325181856483 38.1793598983615  
44.797320243931 42.5406888281114 40.3235655331796 43.4709415392696  
37.0953622406687

LOC283683 38.957687788868 44.7200265825016 38.0452862258803  
42.5193208629123 49.8304479381623 50.7516773099639 48.1069139823064  
48.1182514902212 47.7644661363247 48.9088046212958 47.3536182445315  
38.9834959368496

LOC283710 41.8409927585705 43.3458769998118 46.0727230219512  
59.2778887402357 39.5595233162192 37.3799542961839 40.1235656101329  
46.4672637826582 44.619512785899 41.8613406887824 39.5399188536544  
40.3691324547049

LOC283711 44.3355304829989 39.2907645923217 45.063792968927  
45.0798408927912 42.7107928951766 43.7630587657205 45.4799270968969  
48.7814131120945 41.3803269429468 41.8613406887824 41.6336636285875  
47.3992733452821

LOC283755 38.2392952513791 39.058673927344 39.9444191873552  
38.4774616639726 40.5213071921891 42.1089765085639 41.6457189049393  
40.2945586900975 39.7985090995539 42.6111832024096 39.0180476861513  
39.1925474898117

LOC283767 41.1928222537953 43.4396866157171 42.108130037421  
45.4634652319753 44.3292391134969 39.4600924554505 43.5627649099623  
41.0844534776541 42.9020321355927 40.1508555768978 44.3405872319478  
46.0085322496812

LOC283788 39.6609238036815 38.5252456306656 38.0452862258803  
41.8778873678551 40.4639532172338 42.157627240486 38.2933870238743  
39.1652965788406 42.1594905198929 47.3791873993182 41.2598458726002  
37.7526485343328

LOC283824 40.5235471987417 39.2907645923217 42.4580504587581  
42.7489468897708 39.2114264935239 42.4155142987678 43.8835874380262  
42.7431359850339 39.5806465938526 41.8613406887824 40.5824352835642  
40.9683275553869

LOC283849 38.1169703906207 39.0894172982439 40.4882741869718  
39.9697332660833 40.9950639693255 33.1602385985469 36.08956004634  
31.0594903826598 41.863927676552 38.4187686307607 42.357910063876  
46.917149434588

LOC283867 40.148780650831 41.2598458726002 50.7502704822135  
36.5393857306744 43.3332476888305 35.7034203372528 41.0381860307445  
37.9837233601316 39.1790517315259 41.6373771565199 42.4580504587581  
41.3481355128089

LOC283874 53.6741873729867 50.8114699212931 51.9214790114499  
87.6763065012524 63.8315840603904 38.9378717994178 53.8687221233237  
49.3880946790306 56.702421372165 69.8941497035747 65.2295773603116  
44.8372404608604

LOC283887 38.1169703906207 40.4359177791566 46.6588655218735  
43.6726153508978 38.9496515344837 47.8636003588181 44.2166118829877  
43.0390857698452 41.2870505273664 39.7835513496873 39.3667161654772  
39.6352613956998

LOC283914 46.0920218698606 43.0227387991135 48.6037684272115  
45.1944222548351 45.4751076037511 39.0266821712099 45.1017494688414

39.6474008369935 40.9901805728485 51.2318935933116 48.1352470945488  
41.863927676552  
LOC283932 58.2902084992082 64.2621389350588 54.9071823326024  
53.8086134112366 81.7765447802116 45.4882438975269 79.3861418060845  
108.366007746533 47.5564423692142 51.3351387089044 59.8070012006708  
53.840976437122  
LOC283951 117.355761277966 135.706144105357 156.884346540644  
84.6435656850129 139.164179214871 102.471939526704 126.336900591139  
64.5257016285499 122.0305509548 79.8511759086625 115.496195377983  
107.154549409927  
LOC283953 42.9104454767916 40.8880530359822 39.4710743516517  
46.8954576545929 44.7829632472754 41.159706131351 42.1607322031054  
37.0390589468421 43.1805016690297 40.5090849993014 41.8168470823451  
40.1700117452801  
LOC283970 44.2718517563299 45.4757965005055 47.4439407315335  
48.055683217958 42.8510579683751 41.7627910693483 39.7576136507593  
44.5658219748173 44.8003345643334 44.8536205629296 45.0017158586743  
47.4699236780425  
LOC283999 43.4626049853157 43.1805016690297 41.528370959196  
53.593974682612 48.2748123114598 43.9724628401189 48.6395795163502  
37.86982638952 43.4656637536244 49.0841460667818 48.2050207071554  
50.8442982601142  
LOC284009 35.6111578834671 42.1607322031054 39.9101908547397  
44.4367387274922 38.8456942580061 39.0266821712099 40.6750540874299  
38.079222289614 41.7627910693483 45.0155543555707 41.7272875295469  
40.4639532172338  
LOC284023 81.0295607064541 77.0927030014721 100.305262467668  
95.9391851122771 94.5055588176321 78.4359273717257 87.8746766762445  
92.9043863423147 80.7409247380392 132.959812230068 113.169111095305  
134.763105070421  
LOC284064 43.4626049853157 36.6968906669565 38.6005272730664  
44.4367387274922 40.9950639693255 35.314469458379 36.5352572191451  
38.8495095797881 47.4699236780425 43.7303813515864 39.8184668132023  
43.3744503319109  
LOC284067 44.5282181324797 43.5182502375207 38.3166554965434  
43.3078542962968 41.0885562160946 42.9695585740813 38.6243997507646  
44.293922970134 39.9444191873552 38.1042454705119 46.0095710163378  
42.9887069977696  
LOC284100 44.6231541342 42.2577689927563 46.1653991089885  
45.334106390212 44.8897737954573 43.8582747295766 41.4742337714895  
43.6434576713809 44.619512785899 43.401782064778 44.3763859390287  
43.4709415392696  
LOC284215 43.0001432913058 40.716553247236 44.0451487108213  
42.4580504587581 43.4544762830742 37.1317006162938 37.4772922422734  
35.0510338774593 40.137818555383 43.4885245598939 43.0971787292711  
36.6603338274678  
LOC284232 44.0328992213727 41.3610369241157 44.9758339877851  
45.8844325913247 44.2607789091176 47.2009420656854 44.9863726205428  
44.7044140979108 41.5635499110307 45.4614234442527 42.7275315121163  
41.4508241771315  
LOC284260 42.9104454767916 41.6466169548846 43.401782064778  
41.7614975630362 43.004943518025 41.554942319225 46.9929836306816  
44.9977782988116 37.0126425326534 45.3530683538086 42.7275315121163  
38.745552403895

LOC284274 39.2076937845359 42.5269793679335 42.785429206422  
46.3203995372658 43.8835874380262 40.4753617660107 43.1602899171656  
38.3269307390572 43.9204029310411 41.1222709786153 40.3180310664156  
39.9519547348106

LOC284288 38.5648843914189 34.0382693188794 35.2838283525874  
41.5464765641928 40.2449343247539 41.3553369544097 43.0930293831497  
39.0620487644635 42.9020321355927 42.3606390470387 37.3687900733549  
46.8129509799753

LOC284293 43.0930293831497 48.0296332183129 38.7745734037492  
53.593974682612 41.5668884168669 46.6872654833579 46.0228732507872  
44.1311654985682 43.6670755115848 45.9004543328976 38.8507804383261  
38.9496515344837

LOC284296 48.8333989709933 43.9421822132391 39.5450079747895  
47.481302504066 56.1186281675573 44.9896851005259 36.8369172900902  
40.7311497914871 38.0213051227859 45.7911932481722 41.0808257270221  
40.4639532172338

LOC284371 53.1309801459151 72.6888636455541 58.0218262176065  
65.084620579901 51.6869155634183 50.5148383400703 84.4422623834916  
53.2046867327331 71.3197554517106 76.4439037944547 71.4414688202373  
64.0541263553251

LOC284379 49.4786466722535 52.4129003341939 41.4613628725541  
42.5664883002833 192.43245357593 55.6735944873518 453.652548085387  
100.654701845984 45.2897806651929 54.4825201506931 41.0808257270221  
55.4635297192076

LOC284402 34.4896350146096 35.8227939208521 39.8299340037009  
43.9282059368202 36.9060997041453 39.2985791324641 36.8369172900902  
46.0633179231318 39.853866204927 42.6793753550854 41.9083581529276  
39.7411455670172

LOC284417 39.4710743516517 43.3458769998118 44.7829632472754  
46.1673159982664 41.1868052124344 44.0804700754786 46.3057385979341  
43.5544347011646 42.9020321355927 43.401782064778 46.972521499515  
36.8690774823319

LOC284422 46.7293238583888 50.8812920005251 39.6451483836089  
46.0228732507872 42.269054475455 40.4359177791566 44.8643898647322  
58.676230030835 48.6494451061637 43.844855336215 38.4689132737495  
43.1805016690297

LOC284428 43.3638918705225 41.4223563635976 38.0452862258803  
41.5464765641928 42.4864576619427 44.6024422254257 40.2601451506332  
41.8767957887205 40.8420925848403 41.2598458726002 42.5023941254529  
40.1700117452801

LOC284441 38.7537364570873 40.716553247236 41.785676764591  
49.5424425850549 43.6587492470348 40.040778349137 43.1931731665131  
39.7509165247419 37.6383530120621 44.571915452417 41.9083581529276  
36.8690774823319

LOC284577 45.2875173643252 38.4330755397458 42.5406888281114  
33.6816578730693 40.0599807618105 42.6575535390785 40.2154497375715  
44.0390019242862 39.7537274655115 43.7303813515864 39.5399188536544  
39.6352613956998

LOC284672 42.0532901689036 43.7644428186265 43.0016969050339  
42.6913548400127 43.7517118200398 44.2607789091176 47.5963750520409  
39.3709357615493 42.357910063876 43.401782064778 45.7328341667151  
42.7782216342806

LOC284701 44.9210663878929 44.5152708955623 44.5134109184888  
43.1847628331565 43.7721311701059 41.7196307387855 42.8684958525042



43.0944129868777 41.526706795548 39.0209841108908 40.8668924323919  
40.1249533205858  
LOC284751 38.385865183581 34.5023764006976 40.301483914446  
39.3750969348308 41.9842695818285 35.7034203372528 39.3585350448719  
44.293922970134 36.197424053556 41.9666541498638 38.8507804383261  
39.6352613956998  
LOC284757 37.6397652536077 35.5310164682026 40.5734458834617  
46.0228732507872 47.2074332636566 38.9378717994178 41.3594868055879  
62.6984594468418 37.7384958256497 33.2987269789328 48.042366934301  
40.5703581862752  
LOC284801 41.6354649482853 43.9421822132391 36.2683886571585  
43.1847628331565 45.8051846088552 44.8872784170036 44.7255207589606  
40.3357777530419 41.5635499110307 45.9004543328976 44.6286581923295  
45.6692241948108  
LOC284821 3070.83113612925 5776.17749026501 5479.94045861143  
3379.67054115975 5566.52516420571 7127.13565491501 3176.96480659196  
4259.50675863393 5855.6498679729 4427.89837060471 4048.33132153903  
6873.84878164654  
LOC284837 45.3872406432794 171.800185639868 56.7776874358774  
44.1483976313959 61.1216330559316 44.6524308640784 71.6890300780549  
63.1604223919703 92.681224908389 46.7646877499666 49.7363778831003  
46.2625470410195  
LOC284861 41.9407041937973 42.2577689927563 43.0971787292711  
43.3078542962968 35.7973685350741 44.7804080899431 44.4639405506967  
42.8482181313226 45.1899271235974 42.5664883002833 41.4508241771315  
41.4508241771315  
LOC284912 39.8662795144616 37.8217989841918 45.3974838013476  
41.5464765641928 43.2484996523549 37.3799542961839 40.6750540874299  
45.8669209716694 40.9901805728485 37.7315666632629 43.3085358214154  
45.9693232070002  
LOC284948 41.0608773166058 38.7344853699576 37.0642268327439  
43.8002456102021 44.3557408297309 39.4953494583071 41.3594868055879  
44.5029690493211 38.3418933808844 46.325232414659 44.6286581923295  
37.9607839934735  
LOC284964 44.5282181324797 44.0409178714232 44.5134109184888  
43.8002456102021 46.1804647841331 42.357910063876 42.9803717121865  
42.4580504587581 44.0519245668737 43.4885245598939 39.4410515050885  
40.9683275553869  
LOC284988 138.972884942374 165.411942074375 140.992072231913  
271.206999109791 95.010312646142 334.170764774986 120.02765867291  
273.032063533642 120.123385036416 220.167309646966 177.088290547513  
213.162949250252  
LOC284998 39.0620487644635 39.0894172982439 40.8420925848403  
44.550322123994 38.9496515344837 44.1737502492846 46.3057385979341  
45.5581356216957 40.4220196471124 42.6793753550854 40.0766543123257  
42.357910063876  
LOC285016 45.0985088502363 75.41408189458 48.2883694323339  
44.6905691366696 86.4195039096886 66.0069448981947 55.8019623191927  
52.7787010032051 42.992884918158 63.9129423266349 54.4140381300469  
61.5300817099814  
LOC285033 43.844855336215 46.3635803515159 43.7630587657205  
41.0726336841311 46.1513019317765 40.040778349137 45.8980298854198  
42.8482181313226 40.3316153483289 44.0409178714232 38.2795150354677  
39.8873706855774

LOC285047 45.3872406432794 43.9421822132391 42.8270038153139  
38.2041059863839 44.6834648302383 45.8325181856483 42.357910063876  
39.0620487644635 44.3440839686558 42.785429206422 42.8263096141654  
37.5556299264699

LOC285053 1810.67209360676 3502.80810319252 2966.53151444114  
2101.59244895554 4858.39551231606 3263.05269150231 2215.01815680371  
2721.97551918611 2721.97551918611 2294.75523373329 2992.62035058532  
3176.96480659196

LOC285074 142.492693744683 123.841740274811 104.480361196422  
128.281765653795 94.6432868887401 111.240804216088 106.140215438654  
122.482560090133 93.0888239577809 152.95751212223 116.725539898394  
125.290426098227

LOC285095 43.5710871617107 42.0709558258414 46.4569566520107  
50.378948785456 48.0234896130991 52.8421046802739 46.5650556481721  
46.8954576545929 55.2114969675545 48.2596564318071 45.9104478407175  
48.0350549043063

LOC285141 39.4710743516517 38.3322849790657 39.0775870687758  
42.0102671859606 36.7356360093603 44.9896851005259 53.0277416531043  
45.9604707098953 37.0126425326534 43.9450023643394 42.2618615571566  
45.1735152121056

LOC285176 3562.96193568469 4200.38495514552 3761.48462220262  
3421.24021192326 5971.45293864208 6089.64191751349 3055.1209535841  
3966.51586153125 4427.89837060471 4148.07163380544 4168.41947709165  
5156.59948231705

LOC285216 47.8249696958403 43.9421822132391 36.0306975524309  
40.4359177791566 41.8806343997257 46.0364000143537 43.8206425661746  
37.5511560880902 44.1519466943185 39.4710743516517 48.8744644207821  
46.8129509799753

LOC285299 45.5758521267508 37.6383530120621 39.991353369336  
46.1673159982664 40.148780650831 43.0860383229288 48.4859552186772  
35.5798430594271 41.2870505273664 39.6719190054379 40.8225507267584  
42.4607795638552

LOC285307 33.9561816279577 40.3384318592985 42.2577689927563  
48.1662933382789 40.4639532172338 39.2985791324641 49.540449125788  
36.3405039629059 44.7058233759912 39.9948390976317 41.4508241771315  
42.7782216342806

LOC285359 34.2773859804062 42.0500582486532 39.3709357615493  
43.607701594929 44.4489662507893 44.4311655729487 40.8681871019812  
52.0503062610092 40.547835538778 50.5734308316823 44.9713479185144  
45.3267183347084

LOC285382 63.4610447573417 74.5654028199926 61.9293105089291  
59.987045425047 69.493532577364 273.379591993579 64.5722284870633  
49.9332280449549 83.2563086075874 125.946162432491 135.308001652191  
179.342338803631

LOC285407 42.442231667357 43.3458769998118 45.5883690965192  
45.5869891570251 44.2607789091176 43.0860383229288 40.4359177791566  
41.9315419791594 45.1899271235974 43.2988017098387 43.1931731665131  
45.4799270968969

LOC285423 39.5676051939342 42.7275315121163 45.645828394758  
46.614092935749 42.6575535390785 42.6575535390785 43.2721716572958  
41.4812544772644 41.5296458719756 43.9450023643394 45.2685999173781  
43.9282059368202

LOC285442 37.3463875295726 37.6383530120621 39.2707964550441  
39.6292788039793 41.7929491793697 40.4359177791566 43.9450023643394

38.6454098044474 36.8127605061228 43.1839109702714 46.5650556481721  
42.357910063876  
LOC285444 41.7397731376692 39.9697332660833 50.9933795450314  
42.1273928203021 48.2748123114598 40.3357777530419 46.1634822993009  
43.1567024035183 40.9901805728485 42.6793753550854 42.5426057453993  
42.8864415494484  
LOC285453 47.4870742154624 47.3536182445315 43.401782064778  
44.4912617551615 51.0107745412152 48.1997158668729 48.4099370357307  
46.3685439301234 43.6039443285137 48.9088046212958 47.6884372645373  
55.3563533836982  
LOC285479 44.7044140979108 41.8848959280916 49.1067959632109  
49.7350276169552 40.8873907150245 42.0574848021044 39.8695929627783  
39.4710743516517 45.7452456977857 43.4885245598939 44.2925355984056  
45.2783024981315  
LOC285484 40.0557788909923 43.8495248991589 42.157627240486  
43.4410741327254 44.8897737954573 46.6872654833579 39.2533668167483  
46.695848687694 42.4540072551568 41.3321861371202 38.745552403895  
44.5432192783161  
LOC285500 44.5282181324797 36.5219488315447 40.8420925848403  
41.4273122914951 37.956732373465 38.7340969861754 54.6414321010929  
40.2382908228517 45.3756389170606 38.528621456378 38.956280281655  
42.0424641526302  
LOC285544 44.2350046179299 45.3486182278177 42.640829914102  
45.4634652319753 45.4751076037511 43.1826328292558 44.6032218589199  
42.6450179841129 43.2761454096265 41.7405682794166 44.7114813656401  
38.9496515344837  
LOC285550 53.4921736109774 54.1773909134233 58.637422084759  
64.0903425729408 79.6516904169771 87.0685571351947 65.1041577962151  
44.5029690493211 52.5772854102326 63.1091746640396 55.6151308605445  
54.1090536870282  
LOC285556 44.7044140979108 41.3610369241157 44.2405728317107  
47.481302504066 42.7107928951766 44.3648993568405 40.9157352260901  
41.2551966132486 37.0126425326534 42.6793753550854 48.042366934301  
44.0451487108213  
LOC285577 48.5835484742456 44.7829632472754 51.6159542017038  
51.223859150798 52.4370718282084 48.9826868640753 53.0277416531043  
47.9942520395434 46.7760357462635 58.6439719071099 45.4799270968969  
42.57175366709  
LOC285588 38.5007204246293 39.1982470626863 47.4740726032707  
43.4410741327254 46.7508829977587 38.8336427948187 43.8206425661746  
42.2577689927563 46.8873421271259 48.1392888470269 43.1931731665131  
47.3992733452821  
LOC285636 213.261004438127 178.123995338196 194.207518642389  
217.848539722853 198.754967214875 230.649032296928 277.588692595406  
288.923207993626 249.889110678139 225.960701908311 223.219262492785  
211.790532633462  
LOC285697 43.844855336215 46.1569135229922 46.3411353377615  
53.2046867327331 46.4343327861696 44.3648993568405 45.1017494688414  
42.9301944191913 42.2577689927563 43.9450023643394 43.5710871617107  
40.1700117452801  
LOC285733 42.3433931248155 42.0709558258414 39.991353369336  
42.6913548400127 40.5710637884029 40.650742261428 42.0605906240248  
39.3709357615493 37.7384958256497 41.1222709786153 45.4799270968969  
39.2469742642337

LOC285735 36.8072833828297 45.3486182278177 38.6727842796202  
35.8472302065546 40.7779767565889 41.3553369544097 34.806104801006  
39.7509165247419 40.137818555383 44.0409178714232 35.1470994647364  
39.0536056496869  
LOC285768 40.4639532172338 48.0296332183129 46.3411353377615  
45.5869891570251 44.3557408297309 38.6414316877471 50.6774883370457  
46.5717043290731 40.9901805728485 40.8049408996274 57.5430365699386  
35.4484652445078  
LOC285900 764.858304889802 1033.99699402259 1075.04105984319  
915.102542160713 1436.67510926345 1824.79010714035 792.022171185649  
887.118866402149 1061.61186520958 1064.35745220225 1055.00793806075  
1408.59798540643  
LOC285908 51.1055541075029 79.9567256807679 127.567860003773  
70.0402992940342 110.009834478125 61.2387559102636 56.0515443021293  
139.342661711134 69.3300058073438 99.7807691901691 96.4278951689874  
67.5047089908724  
LOC285929 49.7827734675743 76.4439037944547 41.6977706798234  
37.8442841690502 76.5375674421131 71.3932787152381 64.8367546135053  
40.1474543172332 47.3791873993182 75.0665411373616 57.4622430729629  
55.8775622338124  
LOC285941 39.8662795144616 38.0226905622357 39.6451483836089  
40.1804147506786 41.0885562160946 36.4986986135769 40.6750540874299  
42.7431359850339 39.853866204927 40.8970401536578 36.43924066428  
37.3600014814388  
LOC286016 154.509548705054 102.053879707074 116.949813289388  
121.423421895502 113.747633871556 102.322851896214 205.279698624867  
160.777879976503 227.059460958349 112.919063481867 94.3537052300317  
133.151333210366  
LOC286076 42.7150227340364 42.1607322031054 36.1042012504758  
36.3604951341921 40.6723334103791 47.5733603903505 37.3799542961839  
37.7612949798895 43.9450023643394 46.1390887492649 43.4709415392696  
39.6352613956998  
LOC286094 38.957687788868 41.2598458726002 37.6557714476853  
39.9697332660833 40.148780650831 43.3785777889265 38.941855825269  
38.2782436497441 38.1169703906207 39.2623423164488 43.0016969050339  
41.4508241771315  
LOC286177 35.4287975493553 42.0709558258414 40.931294690669  
40.8681871019812 42.3685136297603 40.5281496800812 38.6243997507646  
43.3262148375525 40.6957787921451 37.8217989841918 39.5399188536544  
38.4330755397458  
LOC286187 38.957687788868 41.2598458726002 36.2683886571585  
36.890925044696 39.7568367479301 38.7340969861754 40.4359177791566  
39.0620487644635 40.7847110517594 37.8217989841918 36.131485826118  
35.5523662009011  
LOC286208 63.7818442618767 109.23113111292 66.737740728688  
39.7411455670172 64.7488184936482 39.7394181011603 98.8657527308305  
107.427186954956 74.7934385405346 97.1201502245778 110.440072569721  
112.727277807495  
LOC286239 39.3709357615493 35.7393138893354 35.0970060242246  
34.7266486944713 34.5301949364147 35.4142595025086 40.9157352260901  
34.3865306339645 29.7878371181841 32.5178504369282 36.5359455830388  
34.1509644696334  
LOC286260 38.2083710281545 36.4002279956519 38.6005272730664  
37.7469621225553 34.7018263647985 35.2067831864574 41.5817737564592

39.7509165247419 38.9834959368496 37.3179578037963 36.3390947880186  
39.4490233720848  
LOC286297 40.3478825593224 43.1464706017434 43.5710871617107  
46.8249967544573 44.5668141895992 42.2114134935898 44.7255207589606  
45.9604707098953 46.6944238390932 44.9673049606589 39.7576136507593  
44.696023817801  
LOC286310 53.5643281930979 47.015085768072 48.1331309338997  
52.3004056941891 46.6397391251762 52.9482338979681 59.1774824918359  
57.6684494624163 52.0228313532986 58.3285450269055 48.7078937513299  
52.4992300612807  
LOC286411 48.5835484742456 41.9455842688118 48.9720399485413  
46.614092935749 45.7407938943718 47.0940613507321 51.2417443769676  
46.1673159982664 45.7452456977857 45.1569741609597 46.0905079010237  
41.4508241771315  
LOC286467 46.7293238583888 46.2286164776607 84.1895471533806  
46.8249967544573 97.4829901136163 47.5733603903505 50.7502704822135  
46.8954576545929 62.1120770925897 43.9783383422823 41.2598458726002  
44.293922970134  
LOC286478 44.0328992213727 39.7835513496873 36.3604951341921  
45.4634652319753 44.0451487108213 47.9503724044453 43.6753843488695  
42.0494116081998 39.2809305246091 44.0409178714232 37.7384958256497  
42.1537476443423  
LOC286528 44.7915315085948 43.9421822132391 47.646800205189  
50.8567345921473 42.7982502551634 48.1591264215184 50.8388984085636  
46.8954576545929 48.1174861108648 41.9666541498638 41.4508241771315  
47.2131144508464  
LOC338328 42.1537476443423 46.0713306971594 46.5650556481721  
45.334106390212 41.8806343997257 47.8636003588181 44.6032218589199  
40.6171774724171 35.860430241131 42.785429206422 39.9070785037411  
38.8495095797881  
LOC338579 37.4554876386402 42.2114134935898 39.991353369336  
40.646702696033 42.4493032770053 43.3269087731399 42.810624012519  
42.6022652963326 46.0633179231318 42.8414096678708 43.8002456102021  
38.0958223740111  
LOC338586 33.3307770183871 34.5023764006976 33.8558232866797  
34.2080003860523 35.6434124419782 37.2686490268265 36.197424053556  
30.9078709537098 33.1602385985469 35.0668743708816 34.9428206949566  
36.7762265039864  
LOC338588 41.9407041937973 44.8529259387308 49.7350276169552  
51.949834638817 39.7568367479301 44.3648993568405 46.9929836306816  
41.1575777497576 45.6582729799009 49.0841460667818 44.7114813656401  
42.7782216342806  
LOC338667 46.7293238583888 41.8073910693411 42.157627240486  
43.9282059368202 42.7982502551634 38.4330755397458 48.0283573444179  
45.9604707098953 44.3440839686558 45.1569741609597 39.0550139257658  
53.9431600945419  
LOC338750 39.5676051939342 34.2618170189676 32.771863438151  
34.1051821768421 37.3508690072156 37.5887129572848 44.8643898647322  
35.2642250366721 35.9645119596869 34.9138625012006 36.131485826118  
40.0557788909923  
LOC338756 46.441301934328 43.0227387991135 45.063792968927  
44.0451487108213 51.6869155634183 43.9724628401189 44.6032218589199  
46.2779564481158 46.8873421271259 46.441301934328 40.3452320167286  
43.5738557773903

LOC338758 64.4415447415281 85.8945498067934 101.804757613639  
740.709094645073 87.2282539094452 100.017263238916 128.391264770998  
115.482982633699 68.9038222450855 57.9713749600418 88.5511408870489  
55.0767527801658

LOC338797 35.8208542506595 39.6995529770239 32.9174234020987  
36.264823544143 31.6519589095843 33.895835691032 33.4316681623175  
35.3608605269276 39.9444191873552 35.4990901121893 37.9230440150891  
41.6550823405646

LOC338799 58.9870089759222 79.0276852011359 81.1851792173226  
44.0451487108213 63.7818442618767 42.0574848021044 49.9162522057712  
46.2231598401576 77.2778958631233 70.1597323687098 55.7418331108915  
44.2527566343661

LOC338805 34.2180669723984 34.9262464079777 41.6079958749402  
39.066284740632 35.7973685350741 32.4301586830653 37.3799542961839  
37.7612949798895 38.9834959368496 35.3849221682845 34.6366195121669  
39.7411455670172

LOC338829 40.5654775358427 45.4143854024453 38.6005272730664  
46.0228732507872 38.0598374201407 46.263826584899 41.4742337714895  
35.0510338774593 37.8319142847141 35.3849221682845 35.860430241131  
39.4490233720848

LOC339047 41.4508241771315 43.1805016690297 43.2727395820105  
39.6292788039793 44.3945927214812 41.8184943683601 41.8840405494932  
40.7773839715843 45.4190899180032 41.0666774301909 42.2401544671596  
40.1108006454868

LOC339123 1045.20336057833 1658.86829668934 1868.51164332659  
891.080174768895 860.265067346622 1347.156644445545 1151.25293766167  
818.290793784784 1084.23003918768 1398.21942794938 1686.40194722823  
945.065986430527

LOC339209 42.0532901689036 47.4740726032707 42.7303139017786  
40.1804147506786 41.5668884168669 37.1317006162938 40.5585676679482  
44.4031868028216 38.9834959368496 48.2596564318071 42.170702295259  
43.2776458914333

LOC339240 44.1737502492846 41.0678614026819 40.0998167098057  
40.8084239472012 42.039525923161 40.1428591998404 38.977631784251  
39.5954353681031 42.0621425894624 42.0621425894624 45.180469580407  
40.8098117292322

LOC339344 244.678323059428 278.629995328901 308.183340806373  
190.348435737155 536.151587705678 214.774035015293 193.262615637464  
210.133037772969 278.773982275525 257.948490663615 247.246045048229  
284.013140015092

LOC339524 42.7150227340364 42.7775752471711 41.785676764591  
40.7481155008596 40.0599807618105 45.2852528185486 43.0930293831497  
55.421880601441 48.3954967265007 41.8613406887824 41.5421429082231  
41.3481355128089

LOC339529 42.6036491382658 42.7775752471711 44.1452943804044  
44.0451487108213 41.7929491793697 39.4953494583071 37.2892641289258  
41.0381860307445 42.7150227340364 38.2069499294002 39.6403089864678  
42.6758568421347

LOC339674 39.3100256336821 42.2900457798748 41.437237454134  
40.9085497163517 43.1847628331565 42.8598805316863 40.2154497375715  
43.9604529016594 43.5669306063196 38.5921548841176 39.6833800000587  
41.2905987859365

LOC339692 46.8954576545929 45.2556760873335 47.646800205189  
41.5464765641928 50.7615314686244 50.4022543872993 49.1067959632109

45.4757965005055 46.9739160257217 54.8979897528792 46.8954576545929  
51.9447450229707  
LOC339742 42.8596678196469 38.2263227947189 42.6861857638473  
39.5551556615516 41.6383327669122 40.9506062495231 42.7982502551634  
40.4359177791566 42.992884918158 40.1537043758608 44.0409178714232  
42.3214282169749  
LOC339746 41.9407041937973 34.9262464079777 39.0775870687758  
38.8495095797881 41.5668884168669 41.159706131351 36.9355798143571  
34.5886782974123 36.8127605061228 34.9138625012006 36.8282383070068  
35.1451084093692  
LOC339760 49.9419897484381 43.683792219729 40.6737160001291  
45.5869891570251 42.269054475455 42.8598805316863 44.4639405506967  
42.0494116081998 42.1594905198929 42.6793753550854 38.8507804383261  
38.5279745308203  
LOC339766 39.4710743516517 79.2185250088688 958.473187253938  
50.5310598656998 64.6374507338031 49.4157684139858 51.1541843174981  
46.8954576545929 52.4539007817929 305.554059609771 216.943972794603  
1428.47642890543  
LOC339778 43.1805016690297 41.8073910693411 49.2041300973417  
54.6089451252049 35.9894133432376 43.0860383229288 55.4004611309636  
42.2577689927563 41.7627910693483 43.401782064778 43.3085358214154  
45.1735152121056  
LOC339782 52.502055890816 43.0971787292711 50.3950981988762  
44.7980740332174 43.3332476888305 45.6129956328415 42.4939802311136  
42.9301944191913 44.5303781239209 46.1390887492649 44.2142581488029  
41.2437378488025  
LOC339789 40.9558083259517 43.0971787292711 43.8495248991589  
37.651298468202 32.325260431418 40.040778349137 41.9393838138203  
37.4484310268909 42.992884918158 37.5343260962758 37.7384958256497  
34.6720534245631  
LOC339799 42.2455707947223 37.5469247328848 35.2838283525874  
36.3604951341921 37.1565984182084 36.3845892764084 40.5585676679482  
37.7612949798895 32.8704945047196 33.2987269789328 35.860430241131  
35.5523662009011  
LOC339804 40.6559419616644 45.8669209716694 49.8344973836834  
72.4834467838798 45.3675390992851 56.6172748471831 41.253645578517  
46.1673159982664 51.1055541075029 54.7827221235949 55.9604109457703  
51.2318935933116  
LOC339809 39.5676051939342 40.148780650831 46.5650556481721  
38.2041059863839 44.4489662507893 44.1737502492846 42.7431359850339  
43.9366081640576 43.2761454096265 43.1839109702714 37.3687900733549  
45.9693232070002  
LOC339862 44.436995101921 47.9665737016961 41.6079958749402  
39.6292788039793 51.4527545197672 45.9266745571724 42.1607322031054  
53.1052228246467 52.1186591838715 41.6373771565199 41.9908237694988  
41.2437378488025  
LOC339879 43.3638918705225 39.6123051184545 38.7745734037492  
34.9221408381038 38.3561682218911 37.3799542961839 34.0777108441756  
33.2467975244196 37.8319142847141 35.195364621675 43.0016969050339  
38.0452862258803  
LOC339902 44.7044140979108 36.3110701990588 42.2577689927563  
42.357910063876 43.4544762830742 37.9951997351435 41.1507980856436  
45.2806199505029 36.0741672064298 41.7405682794166 41.9908237694988  
39.0536056496869

LOC340069 47.1962846565261 45.3486182278177 39.991353369336  
38.2041059863839 38.8456942580061 38.2293008890613 40.0052661202207  
32.0636251428594 42.0621425894624 44.1379638573455 41.2598458726002  
40.9683275553869  
LOC340094 39.4710743516517 45.2556760873335 39.1799070031819  
43.8002456102021 41.7929491793697 45.2852528185486 45.1017494688414  
44.7044140979108 49.9162522057712 47.0055981216687 41.0050831223107  
44.4475838947656  
LOC340096 40.3478825593224 42.0709558258414 46.1653991089885  
37.7469621225553 42.4864576619427 45.3882138838137 42.4939802311136  
44.2159020605784 45.0997987980157 46.7646877499666 39.9070785037411  
45.9693232070002  
LOC340113 41.6354649482853 42.8542642792862 40.0998167098057  
45.334106390212 43.844855336215 37.2686490268265 40.6750540874299  
42.5435283762933 47.27543600687 44.3648993568405 42.4580504587581  
43.1805016690297  
LOC340156 39.6609238036815 34.0382693188794 39.6451483836089  
41.1886975241176 45.8051846088552 37.0180934800573 44.6032218589199  
42.357910063876 46.4861258030402 44.6918600441328 48.3847843498476  
40.5703581862752  
LOC340204 38.1169703906207 46.8954576545929 37.8386378737561  
36.0481934423077 43.4544762830742 37.3799542961839 64.0985088513857  
45.9604707098953 47.798305839406 37.0320432433314 40.723990462047  
40.3691324547049  
LOC340228 48.1952521496489 42.9358255168086 41.1367478979484  
41.1886975241176 44.3557408297309 42.2577689927563 45.6042625176633  
40.831207953647 43.1805016690297 50.7855742231932 43.3085358214154  
41.7575097298927  
LOC340260 38.2496050953547 40.3384318592985 41.3366779545815  
48.665578118898 38.7864161493321 42.357910063876 37.7598032934773  
41.3012916486748 42.1594905198929 40.2112371512838 38.4251036088595  
40.3316153483289  
LOC340268 37.8386378737561 36.1232327599945 32.9174234020987  
42.9358255168086 39.6535880152834 44.2607789091176 45.8980298854198  
38.5457716679071 39.5806465938526 43.0919221375514 41.5421429082231  
38.0452862258803  
LOC340511 41.3387790895716 42.0709558258414 44.5134109184888  
43.3078542962968 40.3452320167286 41.554942319225 38.1793598983615  
39.0620487644635 43.4656637536244 36.9102644736882 40.547835538778  
41.1554481567603  
LOC340515 44.5282181324797 41.554942319225 43.8495248991589  
44.4367387274922 44.4489662507893 49.5424425850549 48.8319884367456  
44.4031868028216 42.0621425894624 40.7063426028871 48.8088340735921  
43.8575940017119  
LOC340527 37.7805366040928 41.4508241771315 39.0775870687758  
35.8041229658453 35.3930760356466 39.5472604976664 37.8877750141557  
43.3838505886856 41.0476065156912 34.9138625012006 38.8507804383261  
41.1066323911308  
LOC340529 36.5393857306744 39.6123051184545 36.178547300352  
41.1886975241176 38.9496515344837 45.9266745571724 37.7136011474903  
41.4508241771315 39.4762546236449 37.4302011516587 39.5399188536544  
41.863927676552  
LOC340549 44.7915315085948 36.0366673493555 41.6079958749402  
54.6089451252049 39.9697332660833 45.0882356578404 43.5627649099623



43.7396619462033 40.4220196471124 40.7063426028871 46.8954576545929  
35.1451084093692  
LOC340598 63.9851732498913 57.7757446006652 48.4890615340603  
39.853175885492 58.6481644777552 44.3648993568405 60.6548851977964  
109.649431670339 64.3425836997629 41.8613406887824 44.6286581923295  
44.3521099857368  
LOC340602 37.4554876386402 39.6123051184545 46.6588655218735  
42.2496337895968 45.6895223823001 41.6590564937735 38.2933870238743  
42.6450179841129 39.5806465938526 40.5090849993014 46.6442692119997  
40.6614700944853  
LOC340900 41.8409927585705 40.4359177791566 40.301483914446  
51.223859150798 41.7929491793697 39.2248354955045 43.1931731665131  
39.9576138799997 41.6616444147804 42.8936990772838 38.5668610487033  
42.357910063876  
LOC341112 43.4626049853157 35.4484652445078 43.6670755115848  
43.074472921841 47.0954207417646 42.0574848021044 34.0777108441756  
39.7509165247419 43.5669306063196 41.3321861371202 42.8263096141654  
42.8864415494484  
LOC341346 49.3463416794995 41.554942319225 43.0971787292711  
43.4410741327254 44.9936360641969 46.4648868771662 46.3057385979341  
49.5185112777773 42.1594905198929 39.3698811593364 41.9908237694988  
40.7704587752083  
LOC341356 44.7915315085948 35.6434124419782 38.0452862258803  
40.0698728584484 43.1252272136667 45.7300501624017 41.9393838138203  
41.4508241771315 39.2809305246091 43.7303813515864 41.5421429082231  
38.6454098044474  
LOC341457 10072.2414399735 9060.10165509099 9938.5091387622  
5971.45293864208 12456.731302703 5733.54417656207 10617.4323014458  
6134.89208517976 13230.9863405074 3562.96193568469 4235.59743465057  
6258.22561934986  
LOC341604 48.1952521496489 43.1805016690297 51.0539624358342  
46.0228732507872 49.452985143568 49.4157684139858 45.8980298854198  
43.9366081640576 42.0621425894624 43.6033221838149 46.2560238004757  
46.1592873342534  
LOC341651 43.5710871617107 44.2630383225933 40.4882741869718  
43.9282059368202 36.8059561571675 39.9397419279057 42.9803717121865  
42.8482181313226 43.3744503319109 47.3791873993182 34.266241549578  
44.5432192783161  
LOC342346 43.5710871617107 43.0971787292711 46.6588655218735  
47.8164193292842 51.940083408061 48.7781962164988 54.9765783642973  
54.3820590274321 47.4699236780425 45.6868589181768 49.5923712603197  
49.1200355938198  
LOC342541 43.1805016690297 43.683792219729 46.5650556481721  
37.29566077996 48.8381507187986 42.6575535390785 37.3799542961839  
46.695848687694 43.8482802038826 49.3000844711116 47.6125796208753  
44.1452943804044  
LOC342892 45.5758521267508 37.920964499903 44.7829632472754  
44.4367387274922 44.7829632472754 37.0180934800573 41.0381860307445  
31.8228237796461 38.9006788676407 39.3698811593364 42.5426057453993  
39.8497227447888  
LOC342897 108.815245119101 156.259762538052 392.622487173359  
66.224559122062 83.3905516293346 51.8103411703261 46.5650556481721  
1219.52011418558 189.398959817735 66.7299966077909 60.4620008899889  
42.1537476443423

LOC342900 40.7609952437622 41.554942319225 39.6833800000587  
44.0451487108213 45.1899271235974 40.7063426028871 38.4456289125816  
41.9315419791594 40.4518431978241 39.8455060654531 42.7275315121163  
40.9149601380325  
LOC342918 46.0023068797812 36.3110701990588 38.1421709520616  
34.2080003860523 37.0526522140242 38.8336427948187 43.9450023643394  
31.1401844809132 30.3212695028233 40.7063426028871 33.7948557837079  
36.449101775775  
LOC342931 37.6397652536077 37.8217989841918 42.2577689927563  
37.1894304543751 45.5809132232681 44.0804700754786 43.0930293831497  
45.7476095696859 46.4164127487052 40.8970401536578 41.4508241771315  
42.0424641526302  
LOC342933 47.7267190613906 43.5182502375207 46.0727230219512  
41.6564075217517 39.6535880152834 43.6670755115848 41.4742337714895  
44.0390019242862 39.3750969348308 38.2069499294002 43.9450023643394  
47.2131144508464  
LOC342934 44.2350046179299 43.0227387991135 49.8344973836834  
48.856176220627 43.5544347011646 44.4619248757502 48.1747307200218  
50.5070012045444 39.853866204927 45.0155543555707 38.6662194645633  
45.4799270968969  
LOC342979 81.1350396749303 41.0678614026819 43.4709415392696  
34.5425384901279 61.3077641493507 41.159706131351 67.5206810636627  
96.4072955983042 66.0350709576651 49.8393069675192 64.1267046511632  
44.8372404608604  
LOC343052 39.3709357615493 40.9731067463382 40.7620472083159  
43.074472921841 44.8897737954573 36.9060997041453 37.7136011474903  
38.745552403895 38.5252456306656 40.5090849993014 37.0180934800573  
42.6758568421347  
LOC343296 40.5654775358427 45.3486182278177 42.7303139017786  
44.9370339275041 40.6723334103791 45.4882438975269 41.3594868055879  
42.8482181313226 42.992884918158 44.571915452417 46.6442692119997  
36.6603338274678  
LOC343384 39.0620487644635 46.7591817286632 44.4311655729487  
39.853175885492 41.1868052124344 45.1873487463472 41.3594868055879  
37.6557714476853 46.581796165231 40.7063426028871 35.3362091871364  
42.4607795638552  
LOC343705 38.1169703906207 41.0678614026819 42.157627240486  
43.074472921841 44.0451487108213 43.7630587657205 41.253645578517  
42.157627240486 42.992884918158 45.6868589181768 48.7502645382856  
38.5279745308203  
LOC343927 33.3307770183871 34.7135536792489 38.9790184198145  
43.074472921841 44.2607789091176 41.9543948167375 37.830876898596  
50.9933795450314 39.3750969348308 36.2435874904689 39.7342718293432  
36.5474283500601  
LOC344065 39.1590964332473 43.0227387991135 44.2405728317107  
49.9014504704021 43.9450023643394 44.1737502492846 51.4349390827895  
44.1311654985682 42.5406888281114 42.2614524730856 40.9157352260901  
42.9887069977696  
LOC344165 44.2350046179299 38.7344853699576 41.1367478979484  
45.0798408927912 42.269054475455 41.3553369544097 40.7910160811527  
37.1317006162938 41.1742244762318 44.4652605017595 42.8263096141654  
43.7672102682067  
LOC344167 48.3814421939888 46.1569135229922 41.1367478979484  
42.5664883002833 49.32293280121 44.1737502492846 47.7390230243778

50.0526763693329 46.1101825640108 49.9493230064613 44.7926323492519  
44.1452943804044  
LOC344382 41.4508241771315 42.6022652963326 48.4890615340603  
43.074472921841 44.7829632472754 47.2009420656854 42.7431359850339  
40.4359177791566 46.581796165231 43.2988017098387 47.0110068985119  
52.0359304386476  
LOC344405 62.5968484440453 51.2776048338 57.4622430729629  
42.8848887336829 44.5668141895992 47.5216423686268 48.1747307200218  
66.7530718914083 52.0942589368478 56.5379973844443 58.2315917325629  
51.9085809948666  
LOC344595 46.8712941728147 43.0971787292711 43.6039443285137  
46.614092935749 43.5544347011646 51.4931742685391 44.3440839686558  
45.2230753111113 44.619512785899 53.9918882088235 46.0905079010237  
44.2527566343661  
LOC344741 39.6609238036815 38.0226905622357 39.2707964550441  
42.2496337895968 40.7779767565889 44.9896851005259 40.1235656101329  
42.8482181313226 37.10170285405 46.325232414659 41.7272875295469  
44.1452943804044  
LOC344875 42.442231667357 40.0527893189096 48.0191002461099  
41.7614975630362 43.004943518025 39.0266821712099 42.8684958525042  
44.2159020605784 41.4636047919453 36.1550293353654 37.1059647239814  
39.5418280570561  
LOC344967 45.5758521267508 42.8542642792862 36.0306975524309  
39.9697332660833 37.8679241954337 41.0582900711341 41.706879587091  
37.7612949798895 41.2870505273664 42.4594149893798 47.6884372645373  
37.1747156131306  
LOC345051 42.9104454767916 41.4508241771315 44.3344900481112  
39.853175885492 46.1804647841331 43.3785777889265 45.3597029614942  
41.5464765641928 42.4540072551568 42.785429206422 48.5292718280498  
45.7562276914441  
LOC345222 44.1294459089314 45.0905928998779 42.4580504587581  
42.6913548400127 40.0599807618105 41.6590564937735 50.3519150282938  
43.9366081640576 37.6383530120621 45.7911932481722 38.079222289614  
42.0424641526302  
LOC345537 38.385865183581 45.1694246393676 41.6079958749402  
53.3967242431461 40.2449343247539 38.6414316877471 44.3440839686558  
42.4580504587581 41.7627910693483 37.5343260962758 44.2925355984056  
45.1735152121056  
LOC345630 41.6354649482853 44.1239711172417 49.4573631027613  
41.8778873678551 39.5595233162192 41.9543948167375 52.8496345990125  
44.5029690493211 42.357910063876 43.4885245598939 38.4689132737495  
42.7782216342806  
LOC345643 41.0608773166058 41.2598458726002 38.7745734037492  
44.6905691366696 41.9842695818285 48.1591264215184 52.0942589368478  
45.3872406432794 46.7760357462635 45.2556760873335 38.6662194645633  
47.6040671292013  
LOC346157 40.2543341073001 42.1607322031054 44.5134109184888  
44.1483976313959 43.9450023643394 42.157627240486 46.9929836306816  
46.5717043290731 36.0741672064298 43.4885245598939 46.6442692119997  
42.0424641526302  
LOC346887 56.6951078698291 68.8195659637992 101.804757613639  
63.0153175111747 135.567012693522 65.3096524773304 76.4889974392545  
44.797320243931 101.954354107731 89.07557840469 90.1284518302601  
130.048910817957

LOC346950 65.3531590366085 69.7855392178808 76.1493261430901  
82.2766822827861 66.5187917407182 80.099836448859 81.3082994649699  
92.681224908389 86.7730065232892 75.9037617394486 81.2249082772437  
103.955842514553

LOC347119 40.3478825593224 37.2810767789306 36.4564050256915  
40.5484717678957 32.2133093774284 41.7627910693483 40.2154497375715  
32.4466419672036 35.7973685350741 35.6208308220005 34.266241549578  
32.0636251428594

LOC347292 150.396608064863 156.433762355183 175.936150174315  
162.569762535436 295.5163490537 290.174315362911 187.462631817772  
207.342732103088 148.71330612986 246.568253751149 222.51183424157  
203.586637054746

LOC347364 41.8409927585705 46.9919960628953 38.0452862258803  
47.2009420656854 44.7829632472754 42.2577689927563 40.4359177791566  
41.8417024632349 42.8036731479932 41.4397539024976 44.2925355984056  
43.1805016690297

LOC347376 84.6279355865799 103.289476128549 129.938114164087  
179.322661675979 79.271901834289 77.3999378505514 134.567947469561  
152.031470139119 119.700522283289 63.6197695952215 62.6048727240291  
82.4362183543935

LOC347411 35.7012997405508 40.4359177791566 44.5134109184888  
43.5627649099623 38.0598374201407 46.3715909653832 45.1017494688414  
38.3684202018524 41.074824727477 42.9866214102525 40.6373400186325  
45.8546719310325

LOC347475 39.1590964332473 44.9370339275041 41.0356368374708  
40.9607305725196 39.0564222526273 41.4508241771315 41.706879587091  
37.33030683349 43.3744503319109 41.5435611403119 41.6336636285875  
36.2582325396375

LOC347487 40.0557788909923 38.1312950900467 36.178547300352  
42.2496337895968 35.9058393060637 42.357910063876 38.4005795891396  
39.3709357615493 39.2809305246091 40.4136535208406 38.1835938174625  
35.4484652445078

LOC347544 850.205634919459 1914.9556343048 1845.34855798442  
1205.08559206317 3707.73750609316 2417.02418518222 1087.75682788799  
1237.93130196998 1395.33665255999 1068.10627239579 1313.92053019421  
1511.33844030783

LOC347549 40.2543341073001 42.8542642792862 34.9849896310235  
43.9282059368202 34.3633615460307 37.9003288112261 30.2675713925613  
35.1738399826814 37.4540772310118 43.2988017098387 39.3667161654772  
33.5578650644246

LOC348021 43.1805016690297 37.920964499903 38.9790184198145  
38.745552403895 38.8456942580061 47.6803619768589 43.5627649099623  
43.6434576713809 39.4762546236449 39.8873706855774 39.7342718293432  
42.9887069977696

LOC348174 36.9060997041453 38.4330755397458 37.1643693306382  
57.2856683017619 40.4639532172338 38.4330755397458 45.4799270968969  
39.4710743516517 42.992884918158 40.8970401536578 40.0766543123257  
43.7672102682067

LOC348262 336.44013572926 146.840603547323 185.191228931155  
160.056757080676 185.165420581989 283.111920665176 330.391945158969  
234.946245049134 162.287617963536 265.545792706874 276.59189773139  
175.876518898179

LOC348840 39.3709357615493 34.15544299189 33.553634633839  
40.1804147506786 36.5393857306744 45.3882138838137 36.8369172900902

37.33030683349 41.7627910693483 37.4302011516587 40.1742127891824  
35.2448979801094  
LOC352909 37.0320432433314 38.7344853699576 35.0970060242246  
40.4359177791566 37.8679241954337 40.1428591998404 36.197424053556  
39.9576138799997 38.9834959368496 35.93950183586 34.8383995317036  
40.3691324547049  
LOC374395 708.839262759372 1076.05074395483 1064.35745220225  
960.526372655577 1019.67015337432 738.66912772732 1539.35554229258  
1260.45604038487 1320.7894611262 1320.7894611262 1285.49870339222  
1052.16097214718  
LOC374443 46.6348258763289 52.3896785600751 46.2625470410195  
45.7397504535169 40.5710637884029 44.7804080899431 47.8947595316832  
50.0526763693329 47.3791873993182 48.6124127998952 50.8826620053386  
52.6922486991742  
LOC374491 43.3098985178373 45.0905928998779 42.0233072093141  
43.1275490164761 44.0451487108213 44.0399598874356 43.0930293831497  
42.4926864381766 44.619512785899 45.9004543328976 47.6388115824631  
44.4067063477243  
LOC374768 40.5654775358427 42.6022652963326 45.3974838013476  
44.550322123994 40.3452320167286 43.9724628401189 47.5963750520409  
34.2814697823693 48.2123120250343 45.1569741609597 45.4799270968969  
46.0633179231318  
LOC374920 49.6241203903354 44.3529919625344 48.8100349749783  
47.2009420656854 50.3713170502557 50.0748292497578 44.4639405506967  
48.3590401011623 45.0997987980157 53.8260140375214 51.838002904753  
47.6938628797168  
LOC374973 40.2543341073001 40.7952353240579 40.6737160001291  
46.7577982595088 47.3172462673426 38.1169703906207 45.223075311113  
44.797320243931 33.8558232866797 40.4136535208406 39.9899430628542  
43.3744503319109  
LOC375010 40.8681871019812 34.7135536792489 43.9450023643394  
49.3654837541353 36.5393857306744 39.2248354955045 37.2892641289258  
39.0620487644635 39.1790517315259 36.5806287103157 33.9478220100351  
39.3575468494941  
LOC375190 40.7609952437622 36.6968906669565 42.0621425894624  
44.265834798964 38.1644569189523 40.4359177791566 45.7452456977857  
38.079222289614 40.8970401536578 38.0078357808393 49.4593570700221  
50.7487159427973  
LOC375295 63.61404854326 45.7589758958741 50.0748292497578  
48.3892457696815 50.7216807571528 57.4196234040219 46.90661167038  
47.0540401406168 74.2653431904071 73.7133884699889 53.840976437122  
63.092106057211  
LOC375323 45.9090659324223 41.6466169548846 47.7737810047679  
48.1662933382789 46.8674366115656 44.0804700754786 48.0283573444179  
36.0306975524309 44.7058233759912 43.7303813515864 44.9713479185144  
37.1747156131306  
LOC375748 39.8662795144616 43.7644428186265 37.4642807402741  
46.3203995372658 40.148780650831 42.357910063876 39.0458123429605  
41.6466169548846 40.8970401536578 38.4187686307607 45.0589947942306  
40.7704587752083  
LOC376693 40.3478825593224 40.7952353240579 38.6727842796202  
45.0798408927912 43.6587492470348 38.8336427948187 42.7431359850339  
39.3709357615493 42.8036731479932 41.5435611403119 44.7114813656401  
40.2669497398702

LOC387646 39.266565827316 41.8073910693411 41.785676764591  
36.9912468186322 45.6895223823001 35.314469458379 39.3585350448719  
44.6107027295193 42.8036731479932 37.8217989841918 42.7275315121163  
36.1647506311964  
LOC387647 36.8072833828297 37.10170285405 45.063792968927  
44.7980740332174 45.1137938810047 46.6872654833579 40.3302268293707  
45.3872406432794 48.6494451061637 54.3554233228353 47.4630625313159  
43.7672102682067  
LOC387683 47.4678477186801 42.4493032770053 46.7508829977587  
41.0726336841311 47.0954207417646 38.8336427948187 46.4388841354122  
41.6466169548846 47.7086093893038 46.325232414659 47.3791873993182  
47.1060577218993  
LOC387686 42.442231667357 42.6022652963326 38.9790184198145  
41.8778873678551 47.6884372645373 50.2163892855092 52.0942589368478  
45.0972184964705 45.0997987980157 46.8954576545929 42.911855821602  
44.9070250604284  
LOC387693 44.1294459089314 34.7135536792489 40.8420925848403  
42.6913548400127 43.6587492470348 40.8634043028528 41.4742337714895  
42.2577689927563 41.863927676552 40.6022003765153 39.9899430628542  
39.0536056496869  
LOC387701 43.9309845324767 42.2577689927563 41.1367478979484  
39.7411455670172 45.1137938810047 34.4896350146096 43.3262148375525  
40.7311497914871 41.4636047919453 39.6719190054379 46.7386599624801  
43.1805016690297  
LOC387720 40.148780650831 42.3550738181144 41.2365089689635  
45.334106390212 46.0977687311222 38.8336427948187 40.3302268293707  
44.5029690493211 40.137818555383 44.3648993568405 43.0971787292711  
43.2776458914333  
LOC387723 38.5648843914189 31.8637059340657 35.3649449469275  
33.9645433044281 35.9058393060637 43.8582747295766 36.197424053556  
42.0494116081998 40.7847110517594 42.5664883002833 41.1638563416981  
41.7575097298927  
LOC387756 39.4710743516517 38.1312950900467 38.7745734037492  
36.890925044696 40.5710637884029 43.6670755115848 41.4742337714895  
40.831207953647 38.3418933808844 44.2580151149956 41.9083581529276  
37.4554876386402  
LOC387761 44.5282181324797 40.7952353240579 41.3366779545815  
48.4916117779992 36.2048942610546 41.7627910693483 38.6243997507646  
42.7431359850339 43.3744503319109 43.0919221375514 44.4688999098904  
42.357910063876  
LOC387762 44.3355304829989 43.9421822132391 43.9450023643394  
41.3027031037343 40.8873907150245 43.4681646416585 39.1539892144371  
43.1567024035183 38.7298222155532 42.1622837416589 42.6366765186182  
40.0557788909923  
LOC387763 449.427251674566 416.559486912165 117.228320608065  
240.841214170409 389.686780706341 1448.17151189672 79.4832790698673  
679.309039810384 68.5174271063894 166.734730009916 174.905877478501  
287.932410610182  
LOC387790 42.0532901689036 35.4484652445078 39.9101908547397  
38.2041059863839 46.1804647841331 36.2768299545794 41.9393838138203  
36.9355798143571 32.2545725371494 32.406093465115 42.4580504587581  
36.2582325396375  
LOC387804 38.6454098044474 36.3110701990588 44.3344900481112  
48.856176220627 42.1650127805175 43.2805590023412 43.8206425661746

42.2577689927563 42.992884918158 40.7063426028871 41.4508241771315  
38.745552403895  
LOC387820 480.13416648493 368.390023942835 491.468862309918  
611.538630852232 409.554706384667 434.841521967958 508.278222733886  
419.993482471924 505.294880430281 462.762837284748 541.631969808467  
559.559234461244  
LOC387826 45.0985088502363 44.7829632472754 40.8420925848403  
40.0698728584484 40.6723334103791 45.0882356578404 38.8417151851134  
46.7980335276155 43.2761454096265 38.3092241935352 46.4753015651202  
43.1805016690297  
LOC387841 2220.90215179682 3428.74022048394 3520.7579823657  
2611.32405374107 4200.38495514552 3690.00752647453 2551.57660786358  
3681.41904661708 3428.74022048394 4569.48246031279 3941.3269626913  
3941.3269626913  
LOC387856 46.8806594777844 42.7303139017786 37.4352614195366  
42.8768096578102 43.2869475999748 45.3882138838137 37.6455751461448  
55.6215767260208 42.0059135275878 40.6573239942138 54.8074655158941  
43.2312848495114  
LOC387867 1806.22468459769 3490.63949257581 3546.97585966225  
2013.08489754172 9852.7965902602 4048.33132153903 3217.83121827744  
1796.47241860175 3838.19449971537 3726.73487426505 3217.83121827744  
3634.98300564068  
LOC387870 44.3355304829989 47.2055133646385 44.3344900481112  
43.3078542962968 41.2740822675592 43.5752393599169 48.6395795163502  
42.0494116081998 41.3803269429468 43.4885245598939 42.6366765186182  
41.9430737035925  
LOC387873 33.2552842693684 41.4508241771315 43.4709415392696  
48.665578118898 46.9906120932727 44.2607789091176 50.0088611244948  
38.956280281655 43.0930293831497 45.0155543555707 48.8744644207821  
39.6352613956998  
LOC387882 158.862722884436 117.934830767297 61.6878176260761  
202.081933301612 107.976192446474 118.010166045155 731.670315613547  
223.397586938079 217.263889616995 63.0119737420787 58.2941346100716  
48.1627097465883  
LOC387885 42.1537476443423 47.4076235350059 46.0727230219512  
42.0102671859606 47.9128504683618 41.7627910693483 47.1345949868029  
47.3791873993182 47.6195009345747 45.0155543555707 44.0409178714232  
41.4508241771315  
LOC387895 38.3418933808844 40.6723334103791 40.148780650831  
41.1886975241176 39.1087466732192 40.650742261428 40.0052661202207  
39.8016018354453 41.9635525160083 37.920964499903 39.0061493066838  
43.5420658412177  
LOC387927 44.1294459089314 44.2630383225933 45.8844325913247  
46.1673159982664 36.3390947880186 43.9724628401189 46.0228732507872  
45.7476095696859 47.7086093893038 42.8936990772838 47.5439485437351  
44.3521099857368  
LOC387931 43.0001432913058 41.9894412416874 41.528370959196  
42.2496337895968 45.6895223823001 42.6575535390785 44.7255207589606  
42.8482181313226 43.2761454096265 43.6033221838149 39.3667161654772  
41.7575097298927  
LOC387934 45.1912496459517 357.574415292533 148.736019591731  
64.898351831341 81.4621222177298 51.294537308199 67.3976855661302  
67.0904616289706 117.355761277966 93.7782490229256 91.8414653633828  
120.286733441947

LOC387939 43.844855336215 41.4508241771315 47.2962360458401  
41.8778873678551 44.6834648302383 44.4619248757502 47.2927436772465  
39.853866204927 39.6609238036815 43.0919221375514 36.5359455830388  
41.863927676552

LOC387940 44.0328992213727 46.2286164776607 45.4865173433646  
56.9299697426319 46.0043807840705 42.5660695551615 46.3057385979341  
46.5717043290731 42.5406888281114 43.9450023643394 44.4688999098904  
38.1421709520616

LOC387941 34.4896350146096 40.2493681589104 43.3085358214154  
44.550322123994 42.6022652963326 41.3553369544097 42.629412460409  
37.2237132058632 42.2577689927563 47.611018474151 39.9899430628542  
46.4499258373233

LOC388002 45.8108990837624 39.3999056968598 39.6451483836089  
38.5252456306656 37.5556299264699 44.3648993568405 40.7910160811527  
43.3262148375525 35.9645119596869 47.9056710878325 42.7275315121163  
38.0452862258803

LOC388022 42.3433931248155 35.1224289925572 37.5597671487621  
38.4208429103799 35.4484652445078 34.7983399096627 35.9058393060637  
33.9687743313429 30.7315474127249 42.6793753550854 37.9946685306274  
33.5578650644246

LOC388080 43.9551059970289 41.9894412416874 42.9641759692926  
46.614092935749 45.5809132232681 44.6524308640784 43.8835874380262  
39.8965727231863 40.4997186069494 41.2700204291848 43.9063490244748  
42.3117490140079

LOC388114 44.8914371498528 41.3610369241157 46.3411353377615  
41.0726336841311 48.1473938886239 41.554942319225 38.941855825269  
40.931294690669 41.1742244762318 43.0919221375514 42.7275315121163  
40.6614700944853

LOC388117 42.5193208629123 40.8880530359822 44.8872784170036  
37.1894304543751 45.4751076037511 41.3553369544097 43.4544762830742  
39.5466975353131 47.0804681460898 41.6373771565199 40.6373400186325  
40.9683275553869

LOC388122 47.5647821785529 46.9578963946094 44.3648993568405  
46.614092935749 62.046151104685 49.1013967533186 55.9821365674554  
45.223075311113 50.0526763693329 49.7259371799014 49.319499137678  
50.6141827957642

LOC388153 47.6397712007919 44.6918600441328 47.2962360458401  
54.6089451252049 46.5557478175976 42.750861693377 39.5496902678788  
44.6107027295193 42.992884918158 45.0155543555707 36.5359455830388  
38.3291713594599

LOC388160 46.263826584899 37.7384958256497 42.4580504587581  
36.3134032910614 41.9397336249742 45.889677919201 40.7376840028647  
38.079222289614 38.6322728994674 40.6559419616644 42.4162492820012  
40.3691324547049

LOC388161 40.2543341073001 42.810624012519 42.640829914102  
42.281606728072 42.9090346219023 41.7627910693483 47.8947595316832  
43.4544762830742 44.3754281580557 41.7932258301997 43.5258090162298  
41.2905987859365

LOC388177 44.6231541342 39.0894172982439 43.7630587657205  
40.1804147506786 41.0885562160946 42.750861693377 43.9450023643394  
41.1575777497576 40.5912213523345 46.0119912782855 39.3667161654772  
40.2669497398702

LOC388181 43.0001432913058 43.5182502375207 40.6737160001291  
37.651298468202 38.0598374201407 40.8634043028528 29.8304689114955



40.3357777530419 42.7150227340364 36.4651112441576 42.8263096141654  
33.939263369489  
LOC388199 42.3433931248155 38.7344853699576 37.2838080935695  
34.3595588146954 40.148780650831 36.9060997041453 43.8206425661746  
44.293922970134 37.8319142847141 42.9866214102525 36.7283081422707  
34.4570158133896  
LOC388210 45.0985088502363 41.0678614026819 44.4311655729487  
47.481302504066 42.1650127805175 47.7556758818053 43.8206425661746  
40.931294690669 47.4699236780425 48.3693338695392 44.8872784170036  
47.3172462673426  
LOC388237 46.0493141231657 46.857242935807 47.4439407315335  
43.0016969050339 44.4031868028216 42.5660695551615 43.3832826368789  
43.4936546062207 44.8636979668258 43.9131664408458 42.4580504587581  
41.8291484190524  
LOC388242 38.9229928131225 41.9455842688118 39.991353369336  
43.4410741327254 38.2083710281545 43.0144844590744 38.2280071951674  
40.5158867964016 44.8997235283254 38.957687788868 39.8577530602176  
40.4639532172338  
LOC388255 37.4554876386402 41.3610369241157 31.5151915411476  
36.9912468186322 38.9496515344837 37.4782441311626 39.3585350448719  
37.2237132058632 37.6383530120621 31.1401844809132 33.5370783156523  
36.064718696392  
LOC388259 42.8036731479932 41.8073910693411 40.931294690669  
47.0874209746031 39.0564222526273 42.357910063876 43.8206425661746  
45.2806199505029 44.5303781239209 41.7405682794166 40.9157352260901  
42.0424641526302  
LOC388275 474.379113836506 587.88126282119 546.80979198725  
329.763197973922 699.74961331867 755.106456358949 608.005012673672  
736.405815842011 708.005870621064 439.770250139925 651.078746026341  
848.079114196986  
LOC388276 41.1523487516364 44.2630383225933 41.8751578329365  
43.6726153508978 43.9450023643394 40.9506062495231 37.830876898596  
43.5544347011646 46.581796165231 41.7405682794166 42.170702295259  
38.9496515344837  
LOC388282 41.6354649482853 45.6271294527191 40.5386195997545  
41.0726336841311 39.7568367479301 40.2903961886288 37.2316700720288  
37.86982638952 45.0997987980157 39.7411455670172 38.8173773425835  
39.6833800000587  
LOC388312 34.5886782974123 42.4493032770053 40.4882741869718  
43.074472921841 39.2608760193011 45.6129956328415 39.1539892144371  
42.357910063876 45.0017158586743 39.5637454855233 38.3684202018524  
42.4607795638552  
LOC388327 42.7542287741471 44.7255207589606 45.0017158586743  
39.9697332660833 49.2495730217753 39.5637454855233 43.3262148375525  
42.3180724671488 43.5934599686083 42.1414432370095 45.0997987980157  
48.5708927206434  
LOC388333 44.0328992213727 41.8848959280916 43.1931731665131  
40.4359177791566 42.1650127805175 41.554942319225 36.197424053556  
44.4031868028216 40.6957787921451 38.4187686307607 39.6403089864678  
40.7704587752083  
LOC388344 44.6231541342 69.1414574152997 59.2012779686869  
53.8086134112366 54.9249759425252 77.8490019489375 61.5000955267432  
65.3715655467882 48.1174861108648 80.943990104641 77.5698542248061  
63.3578893149245

LOC388381 44.7915315085948 37.3634897565502 39.1799070031819  
46.7577982595088 43.4544762830742 40.3357777530419 47.8947595316832  
44.293922970134 40.137818555383 43.2988017098387 40.2649309204478  
46.2625470410195  
LOC388397 52.2236479204029 51.0175677516029 49.2041300973417  
58.9168466928565 53.6907197364586 59.9174456081704 44.9863726205428  
46.1673159982664 53.3932110698117 55.7930787690756 53.4088637045445  
57.6075177910677  
LOC388438 41.5421429082231 41.159706131351 33.4240466670776  
41.0726336841311 42.6022652963326 36.8059561571675 41.9393838138203  
38.2782436497441 46.0106098064475 37.6383530120621 40.2649309204478  
45.5800840647989  
LOC388458 41.4508241771315 39.0102066700839 39.2707964550441  
34.3595588146954 38.745552403895 35.2067831864574 37.830876898596  
42.0494116081998 38.0213051227859 36.8059561571675 44.2925355984056  
37.9607839934735  
LOC388474 10617.4323014458 11410.3307451176 8441.71894028273  
8441.71894028273 10072.2414399735 10483.5643876539 18219.5845257111  
9582.11974031559 8703.02873382565 12456.731302703 12125.3293116195  
13230.9863405074  
LOC388476 43.844855336215 45.4143854024453 39.3709357615493  
38.745552403895 40.9950639693255 43.8582747295766 43.8206425661746  
41.4508241771315 44.619512785899 40.1179210534118 40.0766543123257  
39.3575468494941  
LOC388481 41.9407041937973 42.6022652963326 38.3166554965434  
44.6905691366696 42.4864576619427 40.650742261428 41.4742337714895  
39.5466975353131 36.4476883897928 45.0155543555707 44.0409178714232  
42.9887069977696  
LOC388494 40.0557788909923 40.8880530359822 44.0451487108213  
42.6913548400127 41.3755760434934 45.8325181856483 37.6036146841933  
47.6952179922944 37.1820543575123 49.1928206164702 41.2598458726002  
35.0222940937513  
LOC388503 40.0124413244394 44.3088822189408 40.1474543172332  
45.382896148661 43.396731689369 41.9543948167375 43.5898425390297  
42.4996282128333 42.7606905460304 40.2112371512838 44.1148826235374  
41.1801554437554  
LOC388524 2465.65854657837 4550.56817942699 3329.68037676265  
3001.25236839028 8441.71894028273 4427.89837060471 4898.89844391477  
2816.7754199004 5218.25814076207 5177.04105968809 4458.76622334251  
4015.88651424568  
LOC388526 46.263826584899 45.2556760873335 47.9035532886869  
40.1804147506786 40.4639532172338 43.3785777889265 45.4799270968969  
46.695848687694 48.9931786790166 50.5252048155459 45.390192977585  
51.4968903591058  
LOC388532 413.723725202787 466.074595343541 417.4609354305  
748.913487947791 433.89783033465 875.787532301293 544.355979695242  
654.682263833024 470.861392566833 1270.49749036491 1282.9181829891  
1139.81870068001  
LOC388559 42.2455707947223 60.7495043977707 49.8344973836834  
45.334106390212 45.2556760873335 42.6575535390785 52.7002314230604  
43.4544762830742 61.1022920882065 49.9493230064613 49.3901004211918  
55.8087097725119  
LOC388564 257.993462737264 642.946369683508 366.915943380617  
157.885718433312 677.481235695517 156.445000453282 854.712488657987

447.348799009312 850.205634919459 464.209794165593 515.409979010663  
305.279475274196  
LOC388565 48.3814421939888 46.8954576545929 48.3847843498476  
43.8002456102021 49.9493230064613 40.650742261428 45.1017494688414  
43.5544347011646 53.3932110698117 54.4825201506931 46.2560238004757  
46.6397391251762  
LOC388578 43.4626049853157 45.7979032939211 37.7384958256497  
49.3654837541353 49.0828761839116 42.4580504587581 41.706879587091  
42.0494116081998 41.2870505273664 42.2614524730856 41.0808257270221  
42.8864415494484  
LOC388588 239.838643553139 104.740168626646 85.4536891882639  
98.5663841503803 113.747633871556 130.02102880365 53.7423898357583  
101.39385858723 77.2413564369342 162.467159261789 157.979422616649  
135.012695962236  
LOC388621 198.54718783437 288.284384035759 281.906398109158  
471.59454368268 227.686495419561 421.611594456877 315.163147652199  
459.92905629125 294.51382100172 653.880422442079 788.950470077369  
733.358170858378  
LOC388630 45.5758521267508 47.5647821785529 55.4502804236424  
57.2856683017619 38.5512429290626 43.1826328292558 55.5578334877425  
47.6952179922944 47.1744296124496 49.7259371799014 47.299647867533  
49.5539622682049  
LOC388654 982.428740433235 2178.59848996529 1896.06380611235  
1323.73429724066 5733.54417656207 2803.11698341125 1686.40194722823  
1009.47177197543 2067.66516256598 1580.58484708669 1445.73674428909  
2678.43227619157  
LOC388681 61.5882375235292 76.6936010119768 64.7318794662958  
120.284321694275 49.9493230064613 64.0985088513857 50.2016912396771  
57.445796273665 58.2401724760744 53.0357938671646 52.2759825608835  
58.0218262176065  
LOC388692 96.8783070574131 51.3800036046133 71.4473248804357  
45.8844325913247 57.4163094213712 48.5835484742456 51.1541843174981  
39.7509165247419 69.5741225986433 82.1062834830477 98.0473811574767  
76.9953921834156  
LOC388720 15358.8899487375 12770.8282719641 10996.2779403491  
12456.731302703 11176.402230735 13230.9863405074 11795.0477101407  
18219.5845257111 11795.0477101407 16661.6081002448 12770.8282719641  
15358.8899487375  
LOC388743 46.1673159982664 48.4980626712175 329.437593022939  
40.9141850646578 45.9104478407175 39.8455060654531 39.1539892144371  
43.8694505312625 44.5678064264717 121.236881661832 132.588447812638  
101.766641669845  
LOC388755 48.1952521496489 42.8542642792862 39.4710743516517  
50.5310598656998 37.2567512265363 42.8598805316863 44.2166118829877  
49.8344973836834 45.5779686360641 45.0155543555707 41.8168470823451  
40.8681871019812  
LOC388780 41.7397731376692 44.0409178714232 38.3166554965434  
43.6726153508978 47.4548471240051 50.4022543872993 40.9157352260901  
45.3872406432794 46.1101825640108 47.2299678280724 43.1931731665131  
40.9683275553869  
LOC388789 196.465477936749 207.726011653345 229.188779190649  
268.419751472464 309.994784298282 293.944796522337 262.456109739351  
203.46147333933 174.985336606027 276.795797048951 265.176790020229  
388.336994961328

LOC388813 44.5282181324797 36.0366673493555 39.2707964550441  
41.4273122914951 42.3685136297603 42.9695585740813 34.806104801006  
36.2539950294089 36.5393857306744 34.064698871541 39.153226699662  
40.3691324547049

LOC388814 50.5670783769975 45.0115870036541 44.9758339877851  
38.5252456306656 39.859345745831 42.5660695551615 49.2546642180676  
48.5681478665796 52.7512110769042 46.325232414659 41.8168470823451  
45.4799270968969

LOC388849 44.0707087774725 40.3104838541906 39.1480645318984  
41.4636047919453 38.2496050953547 40.8634043028528 41.7614975630362  
38.6454098044474 38.8271346375425 40.1179210534118 39.4410515050885  
38.9834959368496

LOC388882 43.4626049853157 39.1982470626863 42.7303139017786  
37.9875302985336 44.147557390293 35.314469458379 40.3302268293707  
44.8997235283254 39.3750969348308 40.1179210534118 37.7384958256497  
42.4607795638552

LOC388885 38.304249186058 45.7979032939211 44.1452943804044  
36.264823544143 41.9842695818285 37.5887129572848 44.6032218589199  
41.5464765641928 41.4636047919453 37.7315666632629 41.1638563416981  
41.6550823405646

LOC388900 37.6397652536077 40.5400384479766 39.3709357615493  
38.9534635879195 38.8456942580061 41.7627910693483 37.830876898596  
43.1567024035183 39.2809305246091 39.8873706855774 37.5583886316038  
32.6203270051744

LOC388906 40.0557788909923 43.3458769998118 48.1997158668729  
41.3027031037343 48.6224651100733 40.040778349137 42.9803717121865  
42.157627240486 44.8997235283254 44.0409178714232 43.0971787292711  
40.6614700944853

LOC388910 44.0328992213727 33.1817617228171 38.1421709520616  
39.853175885492 40.4639532172338 36.2768299545794 38.6243997507646  
36.8400213077707 35.6970528713709 48.8623729374733 37.3687900733549  
39.2469742642337

LOC388915 38.1169703906207 35.9305494063137 38.6005272730664  
33.9645433044281 43.9450023643394 37.5887129572848 34.4570158133896  
33.0038344711883 34.9428206949566 38.0078357808393 33.8558232866797  
41.1554481567603

LOC388922 43.2724556187214 37.8217989841918 43.5710871617107  
33.9645433044281 39.5595233162192 41.8613406887824 46.5650556481721  
39.1652965788406 47.0804681460898 37.5343260962758 41.9083581529276  
41.863927676552

LOC388923 44.2350046179299 49.3847586637013 39.991353369336  
45.5869891570251 41.0885562160946 39.9397419279057 43.6753843488695  
37.9273653326866 42.5406888281114 42.7275315121163 39.3086414047188  
39.9519547348106

LOC388931 43.4100411978366 43.3972849968032 44.5134109184888  
44.265834798964 41.1868052124344 41.159706131351 41.8315602975157  
43.5544347011646 40.9901805728485 39.3113207075992 47.9269108813022  
38.8034431562381

LOC388938 39.9697332660833 46.0713306971594 35.7105247506212  
40.8681871019812 41.8806343997257 36.6996187567892 43.6753843488695  
43.844855336215 43.0930293831497 49.0841460667818 41.0050831223107  
43.6753843488695

LOC388946 44.5282181324797 43.826317180678 41.3366779545815  
44.7980740332174 43.4885245598939 44.4311655729487 41.9741368971524

40.6171774724171 43.0456011922275 43.7303813515864 44.4688999098904  
44.9734311311394  
LOC388948 38.0089018744739 38.3322849790657 42.0621425894624  
41.5464765641928 46.9906120932727 43.2805590023412 42.0605906240248  
50.3082459161777 40.5912213523345 44.1379638573455 43.5710871617107  
40.3691324547049  
LOC388955 42.1537476443423 39.3999056968598 39.2707964550441  
46.4555908533915 43.7517118200398 40.1428591998404 37.2892641289258  
42.9301944191913 40.6957787921451 41.9666541498638 37.3687900733549  
42.57175366709  
LOC388963 44.3355304829989 43.1805016690297 39.7411455670172  
39.5050383901884 40.148780650831 42.4580504587581 42.4939802311136  
44.0390019242862 42.9020321355927 39.7835513496873 46.972521499515  
38.2350720635382  
LOC388965 42.6036491382658 42.2577689927563 43.9450023643394  
43.3078542962968 36.3390947880186 37.9951997351435 39.2533668167483  
40.7311497914871 40.5912213523345 47.8207974930031 42.8263096141654  
48.7814131120945  
LOC388969 91.2297566574871 134.743068051122 123.233259665079  
78.3509756704423 77.9085946827079 68.6424653037264 79.1432909353319  
101.272774711455 91.8414653633828 121.806692423791 132.117013391364  
110.399579382196  
LOC389000 38.385865183581 42.0709558258414 39.3709357615493  
42.357910063876 34.5301949364147 40.1428591998404 34.2773859804062  
42.357910063876 40.6957787921451 41.8613406887824 35.4386677371439  
35.2448979801094  
LOC389031 43.9309845324767 41.2598458726002 45.310660704531  
41.1886975241176 47.9128504683618 46.6872654833579 49.540449125788  
42.5435283762933 40.0403898620771 39.7835513496873 41.4508241771315  
43.4709415392696  
LOC389033 44.0328992213727 44.9370339275041 41.437237454134  
38.6414316877471 34.0927410219282 42.157627240486 45.1017494688414  
111.291087721139 44.8997235283254 44.1379638573455 47.8284278211109  
44.3521099857368  
LOC389036 42.3433931248155 39.7835513496873 39.4710743516517  
40.3180310664156 38.745552403895 48.7781962164988 39.5496902678788  
39.6474008369935 42.0621425894624 42.785429206422 39.8184668132023  
41.7575097298927  
LOC389043 40.7022020432945 41.3610369241157 39.5954353681031  
42.1622837416589 41.7929491793697 42.5193208629123 39.6123051184545  
39.4223544019653 40.3662560853635 42.4594149893798 43.8002456102021  
42.7275315121163  
LOC389072 40.4639532172338 44.2105195734073 44.0451487108213  
41.8778873678551 44.147557390293 45.3882138838137 55.9276266345493  
49.9332280449549 36.8127605061228 38.0078357808393 41.9908237694988  
44.8372404608604  
LOC389102 41.2424637338424 44.1239711172417 46.7508829977587  
46.8954576545929 46.9906120932727 50.6360662655392 43.9450023643394  
45.7476095696859 48.8842909466002 47.1001757441025 51.4413099192899  
45.3763275588341  
LOC389105 43.1805016690297 35.9305494063137 39.991353369336  
40.5484717678957 41.0885562160946 37.5887129572848 37.0564573649223  
40.6171774724171 40.4997186069494 39.3698811593364 38.5668610487033  
38.6454098044474

LOC389111 43.9309845324767 44.7829632472754 44.7829632472754  
43.4410741327254 40.7779767565889 49.2050538150106 42.2577689927563  
46.7980335276155 50.3245489035833 41.6373771565199 38.8507804383261  
41.863927676552

LOC389118 40.4639532172338 32.6416008433981 40.6737160001291  
37.651298468202 39.2608760193011 42.5660695551615 39.0458123429605  
34.064698871541 43.1805016690297 34.6720534245631 42.5426057453993  
40.0557788909923

LOC389120 38.0089018744739 43.5182502375207 41.3366779545815  
42.5664883002833 41.6806984441849 43.1826328292558 40.1235656101329  
41.3506832276112 39.4762546236449 42.4594149893798 42.7275315121163  
40.2669497398702

LOC389124 49.540449125788 46.9919960628953 45.2313723727673  
47.8164193292842 38.1644569189523 46.574682061365 47.5963750520409  
43.2551508830106 47.4699236780425 50.8826620053386 49.6706535876636  
46.4499258373233

LOC389137 115.894467332637 86.3374157614394 90.9810377546009  
64.6945454069792 130.758455807465 92.4251917286941 81.2136969156029  
119.808125185521 98.7446830481164 111.877209777434 111.320157744612  
96.1181720777683

LOC389142 44.5282181324797 42.6022652963326 40.6737160001291  
41.5464765641928 42.269054475455 40.244271403831 45.7452456977857  
41.6466169548846 44.619512785899 39.7835513496873 40.9157352260901  
43.4709415392696

LOC389151 39.7576136507593 36.9994058279362 38.7745734037492  
37.8442841690502 41.3755760434934 43.5752393599169 35.2163900400329  
39.853866204927 40.0403898620771 39.1621898366355 38.4689132737495  
37.7526485343328

LOC389174 48.0201377454632 47.9128504683618 44.6032218589199  
38.745552403895 41.6806984441849 48.0350549043063 40.0052661202207  
41.1575777497576 38.7298222155532 45.4614234442527 38.1835938174625  
40.7704587752083

LOC389199 46.0023068797812 37.2810767789306 42.7303139017786  
42.357910063876 38.4540849632254 42.5660695551615 50.8388984085636  
48.7814131120945 43.9450023643394 35.6208308220005 41.8168470823451  
38.745552403895

LOC389203 47.8249696958403 52.8264142735929 59.7483827511172  
66.0397471691747 51.940083408061 75.2735539010032 56.0515443021293  
52.5098795466615 65.2881198932621 45.5776159432079 54.2999306485758  
61.7502624458447

LOC389217 32.2133093774284 38.3322849790657 40.7620472083159  
43.4410741327254 34.0045980663271 42.9695585740813 44.2166118829877  
42.5435283762933 40.7847110517594 42.2614524730856 40.2649309204478  
38.9496515344837

LOC389257 41.678190413467 44.3187284857534 41.6550823405646  
41.0726336841311 43.6587492470348 40.1428591998404 42.629412460409  
42.157627240486 41.0476065156912 40.1179210534118 38.3166554965434  
39.2839132447749

LOC389267 42.0532901689036 39.1982470626863 38.3166554965434  
41.6564075217517 40.5710637884029 35.7034203372528 41.253645578517  
38.3684202018524 38.9006788676407 42.3606390470387 39.6403089864678  
38.3291713594599

LOC389286 67.6011992144113 54.5374188496807 79.8773095098789  
84.4422623834916 75.0665411373616 66.8632294055679 73.3042538589134

65.6914955077809 47.3791873993182 41.8613406887824 48.8088340735921  
57.1441484662045  
LOC389293 65.1424206085551 64.4837166864084 48.2883694323339  
51.7739270955254 55.0031529299037 62.5542376788358 53.0277416531043  
62.4219686957673 65.2881198932621 53.7196173866021 53.8260140375214  
68.4278345554565  
LOC389300 47.4678477186801 43.5182502375207 46.3411353377615  
50.5310598656998 42.269054475455 45.4882438975269 45.1017494688414  
42.2577689927563 43.9450023643394 48.2596564318071 43.7585538437696  
43.8575940017119  
LOC389316 42.7150227340364 38.8336427948187 44.4311655729487  
42.357910063876 41.9842695818285 37.3799542961839 44.4639405506967  
40.831207953647 43.4656637536244 39.0648733099061 38.1835938174625  
39.8497227447888  
LOC389333 42.3433931248155 31.1853651446075 35.3649449469275  
38.8495095797881 34.9062568194127 36.8059561571675 37.2892641289258  
38.6454098044474 36.7267557061938 41.9666541498638 31.859589438824  
32.2133093774284  
LOC389362 39.3709357615493 39.0102066700839 36.4564050256915  
41.3027031037343 40.3452320167286 34.3887641786747 37.0564573649223  
41.1575777497576 38.4344387289956 37.1275334308172 34.7308008643142  
38.5279745308203  
LOC389365 41.5421429082231 37.6383530120621 45.1569741609597  
37.8442841690502 44.9936360641969 43.6670755115848 38.6243997507646  
35.6825474397235 41.3803269429468 33.1559412791294 45.9104478407175  
34.9138625012006  
LOC389370 49.1868644496737 45.3486182278177 47.4740726032707  
37.651298468202 39.859345745831 42.750861693377 39.3585350448719  
44.293922970134 49.0986627051784 40.7063426028871 44.553780984244  
45.4799270968969  
LOC389394 39.9697332660833 39.2907645923217 42.0621425894624  
40.4359177791566 37.1565984182084 39.6251842352088 43.9450023643394  
39.2672712041774 38.9834959368496 37.4302011516587 39.0550139257658  
38.5279745308203  
LOC389396 30.3383368296776 38.6414316877471 41.785676764591  
34.9221408381038 42.3685136297603 42.357910063876 39.0458123429605  
39.1652965788406 40.9901805728485 41.9666541498638 35.6970528713709  
39.5418280570561  
LOC389405 40.6559419616644 43.1805016690297 40.4882741869718  
40.4359177791566 41.5668884168669 44.1737502492846 41.5817737564592  
46.3685439301234 44.3440839686558 46.6598879466655 49.532546810992  
42.2577689927563  
LOC389422 42.3433931248155 41.159706131351 39.8299340037009  
42.357910063876 41.8806343997257 42.5660695551615 41.8315602975157  
38.079222289614 43.1805016690297 44.8997235283254 39.9070785037411  
43.2776458914333  
LOC389435 6309.53691418065 11176.402230735 10072.2414399735  
5733.54417656207 6938.87250165681 10351.5373412096 6134.89208517976  
5387.08056045279 8545.48005557056 5246.60459228386 7785.77078492993  
8703.02873382565  
LOC389442 44.5282181324797 40.0527893189096 40.931294690669  
40.8681871019812 43.3332476888305 40.3357777530419 42.9803717121865  
44.7044140979108 41.56354991110307 45.5776159432079 44.4688999098904  
44.7401523707775

LOC389457 42.5193208629123 61.1022920882065 47.646800205189  
48.1662933382789 55.1563703466328 45.4882438975269 44.7255207589606  
87.3634135323569 44.8003345643334 55.1089864632456 47.8284278211109  
46.917149434588

LOC389458 39.3709357615493 41.159706131351 38.0452862258803  
36.264823544143 40.4639532172338 39.7394181011603 41.253645578517  
47.7889447429963 50.3245489035833 41.5435611403119 42.0750889188255  
46.4499258373233

LOC389517 815.810781070699 408.739953606815 558.451033789799  
753.491584605447 378.964387825252 304.133852957499 642.946369683508  
1033.99699402259 375.697071471585 816.746599467159 810.021622878441  
688.168272082335

LOC389523 40.9558083259517 44.5152708955623 41.6079958749402  
42.0102671859606 36.9702228618069 40.9506062495231 43.9450023643394  
39.5466975353131 46.8873421271259 47.9056710878325 41.9083581529276  
43.3744503319109

LOC389599 79.2665546280232 46.1569135229922 50.6004078448405  
58.7338159410728 55.8173045043348 65.2014839770255 72.8653205184014  
50.5070012045444 60.2614254907771 49.5265949137207 54.8532558909227  
57.6860752168769

LOC389607 47.6397712007919 37.8217989841918 47.0055981216687  
37.9875302985336 45.9104478407175 40.4359177791566 41.8315602975157  
50.9933795450314 46.6944238390932 41.1222709786153 42.911855821602  
39.8497227447888

LOC389631 41.6354649482853 35.3307157989724 38.8775560911841  
39.066284740632 37.8679241954337 44.1737502492846 42.0605906240248  
45.1714698794331 41.4636047919453 48.9826868640753 38.956280281655  
36.2582325396375

LOC389633 39.1590964332473 39.7835513496873 42.9104454767916  
36.1562979552173 40.3452320167286 50.0748292497578 40.9157352260901  
41.5464765641928 36.6312676076142 34.9138625012006 51.3103617600342  
44.5432192783161

LOC389634 39.8662795144616 44.8529259387308 44.1452943804044  
47.6687908290818 41.7929491793697 40.7616966228404 43.8206425661746  
41.6466169548846 43.7630587657205 50.6486940895674 53.9517841438975  
45.4799270968969

LOC389641 68.0700069295224 85.1950626054282 102.330999847292  
73.8480604979804 74.9661773375536 44.1737502492846 82.7853677822046  
54.720204938924 106.418690759491 51.5855515705917 51.7538628098347  
54.9919060580109

LOC389669 37.9387791625384 39.6995529770239 40.301483914446  
37.9875302985336 38.9496515344837 40.5281496800812 46.1634822993009  
37.4484310268909 43.4656637536244 43.9450023643394 37.3687900733549  
39.7411455670172

LOC389671 44.1294459089314 45.1694246393676 43.4709415392696  
51.949834638817 44.147557390293 45.4882438975269 51.5967098638347  
44.5029690493211 45.4799270968969 45.0155543555707 41.4508241771315  
40.7704587752083

LOC389672 65.2001674269291 67.9697948557876 68.1780382173625  
72.6824533717231 163.809567262808 114.965999573704 78.8250642061439  
60.5571721986885 98.6825522152097 93.955760127914 80.7198077526005  
91.3112603277315

LOC389676 35.9305494063137 40.5400384479766 40.301483914446  
39.6292788039793 38.9496515344837 39.8455060654531 41.3594868055879



35.7973685350741 33.6288663955758 42.5664883002833 37.9946685306274  
36.8690774823319  
LOC389722 42.6036491382658 40.148780650831 43.9450023643394  
52.3004056941891 46.9906120932727 48.0350549043063 44.4639405506967  
39.7509165247419 44.619512785899 48.2596564318071 39.9070785037411  
46.3411353377615  
LOC389730 43.844855336215 44.5152708955623 48.6037684272115  
40.5484717678957 44.7829632472754 45.2852528185486 46.9929836306816  
45.1714698794331 39.4762546236449 47.1001757441025 41.3553369544097  
41.6550823405646  
LOC389748 33.4902421268456 44.3529919625344 32.8745892439217  
37.29566077996 41.0885562160946 36.8059561571675 40.5585676679482  
35.0510338774593 42.9020321355927 41.2276963324981 40.8225507267584  
38.6454098044474  
LOC389786 43.4626049853157 36.6968906669565 48.1331309338997  
42.9358255168086 41.5668884168669 41.0582900711341 34.6720534245631  
47.2009420656854 46.2027193115397 39.1621898366355 47.0110068985119  
41.4508241771315  
LOC389787 1261.91478863258 1191.93354266135 1041.84536202049  
1516.33074288338 646.791777335656 1405.20888023653 714.075528895169  
878.863554510943 935.815928529014 1303.33517942343 1249.41227924272  
1939.66920192372  
LOC389791 67.6011992144113 61.1452879517526 56.939860285007  
44.7980740332174 70.4607501403122 47.6803619768589 99.9896394343368  
65.9143782252686 68.6379135603075 111.607814098243 74.1425714439424  
63.3578893149245  
LOC389813 40.5235471987417 39.6995529770239 44.3344900481112  
36.5393857306744 43.1847628331565 40.650742261428 42.8684958525042  
39.2248354955045 45.8844325913247 42.4393920571519 40.9157352260901  
39.3575468494941  
LOC389816 138.362914843774 76.2591822114739 44.3635754464295  
41.7082242184693 61.713067508753 43.006072841282 87.3508610599789  
75.7947206223934 58.2834547183468 39.6719190054379 40.1341976911042  
41.0269624684418  
LOC389827 41.6354649482853 36.4564050256915 42.3536549114165  
40.4359177791566 40.7779767565889 39.8785903668981 39.5496902678788  
42.2577689927563 39.2497056720346 39.8873706855774 44.9713479185144  
44.7871262003648  
LOC389830 46.5549623118323 40.5400384479766 43.9450023643394  
41.3027031037343 47.3172462673426 48.9826868640753 41.4742337714895  
45.7476095696859 42.1594905198929 41.8613406887824 48.8744644207821  
44.0451487108213  
LOC389832 42.8036731479932 38.8336427948187 40.5734458834617  
41.3027031037343 39.9697332660833 44.5544727111028 40.1235656101329  
41.0381860307445 41.863927676552 44.1379638573455 45.5707650534259  
40.5703581862752  
LOC389833 106.027997253013 49.83247261979 78.450972383987  
59.987045425047 75.8306078651291 56.4819802857598 58.3675164086197  
80.2680308979464 72.8653205184014 107.348865210074 73.9126724639466  
77.1059855034406  
LOC389834 45.5758521267508 45.7317208802318 44.8872784170036  
43.5627649099623 53.0419743379342 37.9003288112261 37.4772922422734  
47.8947595316832 47.5564423692142 37.8217989841918 41.9908237694988  
44.6484005362281

LOC389842 40.8681871019812 42.7775752471711 47.2055133646385  
45.0798408927912 51.0107745412152 47.6803619768589 38.7337086062875  
41.0381860307445 41.7627910693483 47.2299678280724 48.3847843498476  
47.8931773060789  
LOC389852 36.6480005877129 41.554942319225 46.7508829977587  
51.5913529948887 41.467005949568 42.6575535390785 39.3585350448719  
38.079222289614 37.7384958256497 39.9948390976317 39.0550139257658  
43.0930293831497  
LOC389888 42.3433931248155 37.4540772310118 41.6977706798234  
51.5913529948887 40.6723334103791 41.2567470068038 38.6243997507646  
39.0620487644635 38.2215591930186 44.4652605017595 41.0050831223107  
42.1537476443423  
LOC389895 44.1294459089314 41.3610369241157 40.1985790927248  
39.9697332660833 36.7356360093603 36.8059561571675 36.5352572191451  
42.2577689927563 37.4540772310118 41.2276963324981 44.3763859390287  
36.5474283500601  
LOC389901 52.2236479204029 50.1027491117756 51.9885249508283  
56.4578213622965 51.4527545197672 59.1570467228834 61.6544855697851  
55.9303347977781 56.3441077510744 57.165971310746 54.4140381300469  
54.4992295592001  
LOC389904 45.3872406432794 39.8695929627783 44.8872784170036  
45.1944222548351 39.2608760193011 44.7804080899431 42.629412460409  
41.1575777497576 41.863927676552 44.0409178714232 42.4580504587581  
44.5432192783161  
LOC389906 37.4554876386402 42.6022652963326 40.931294690669  
37.5382094267692 37.3508690072156 37.7000400506818 42.2577689927563  
39.1652965788406 38.4344387289956 40.8970401536578 39.4410515050885  
33.8196020406676  
LOC389936 39.1590964332473 39.1982470626863 34.5718473203083  
41.4273122914951 35.3327761997046 37.4782441311626 36.5352572191451  
39.5466975353131 46.7760357462635 36.4651112441576 36.8282383070068  
38.745552403895  
LOC389958 38.6454098044474 40.0527893189096 44.0451487108213  
41.7614975630362 44.4489662507893 41.0582900711341 43.3262148375525  
46.1673159982664 38.9006788676407 42.5664883002833 43.0016969050339  
45.3763275588341  
LOC389963 37.3463875295726 39.3999056968598 40.1985790927248  
35.8472302065546 44.6834648302383 41.0582900711341 44.8643898647322  
43.2551508830106 36.197424053556 37.8217989841918 33.7948557837079  
44.2527566343661  
LOC389983 37.6397652536077 43.4396866157171 40.0998167098057  
45.1944222548351 34.6227169056411 40.1428591998404 40.7910160811527  
45.1714698794331 53.3932110698117 44.6918600441328 41.4508241771315  
41.2437378488025  
LOC390033 40.6559419616644 37.7384958256497 41.2365089689635  
39.1706564265495 45.9104478407175 39.9397419279057 40.4359177791566  
38.4540849632254 40.4220196471124 39.0648733099061 41.0808257270221  
44.6484005362281  
LOC390110 41.4508241771315 40.6380495994768 38.5045333213784  
45.8844325913247 43.1252272136667 42.0574848021044 38.7337086062875  
49.2019743609873 42.6366765186182 38.528621456378 43.3085358214154  
42.4607795638552  
LOC390192 42.3433931248155 41.6466169548846 41.1367478979484  
48.4916117779992 38.9496515344837 40.7616966228404 35.2163900400329

34.2814697823693 42.2577689927563 43.1839109702714 33.5370783156523  
46.6397391251762  
LOC390205 37.3463875295726 40.4359177791566 35.6139301508335  
37.651298468202 39.9697332660833 38.1169703906207 37.2892641289258  
41.1575777497576 38.8271346375425 40.5090849993014 42.7275315121163  
38.8495095797881  
LOC390211 39.8662795144616 40.6380495994768 40.6737160001291  
41.8778873678551 41.1868052124344 39.2985791324641 39.4600924554505  
42.4580504587581 42.357910063876 39.3698811593364 37.4642807402741  
39.1553169409075  
LOC390231 41.3387790895716 36.6968906669565 37.1643693306382  
42.6913548400127 38.745552403895 33.0463640202858 44.6032218589199  
38.4540849632254 42.992884918158 37.6383530120621 39.7342718293432  
40.7704587752083  
LOC390243 43.9309845324767 39.932537801639 40.9818899755491  
39.853175885492 44.3166120733789 38.6414316877471 37.5469247328848  
40.8833572570383 43.5669306063196 39.7411455670172 35.1470994647364  
39.0536056496869  
LOC390259 42.0532901689036 45.5842286511645 45.6989664108554  
38.745552403895 45.1137938810047 39.7394181011603 44.9863726205428  
37.7612949798895 44.619512785899 42.4594149893798 43.9450023643394  
42.4607795638552  
LOC390282 36.3649677956953 35.3307157989724 42.640829914102  
44.0451487108213 38.4540849632254 36.4986986135769 38.5066108855005  
32.4466419672036 45.4799270968969 46.0119912782855 40.2649309204478  
32.8921051249019  
LOC390332 42.442231667357 38.1312950900467 40.5734458834617  
48.1662933382789 46.3150221024046 43.2805590023412 47.8947595316832  
41.1575777497576 43.6670755115848 41.0057887014368 35.4386677371439  
42.57175366709  
LOC390349 40.4639532172338 38.8336427948187 43.0016969050339  
37.29566077996 33.5412189543102 40.040778349137 40.0052661202207  
36.1375121409002 35.0305278582179 36.3612409063792 34.064698871541  
35.3525469364579  
LOC390354 1201.00042684883 3546.97585966225 2225.65559724391  
1738.00955642263 5525.13078364599 3166.48568397766 1641.74760448254  
1693.5377672895 2113.73880184695 1723.37649434054 2465.65854657837  
2721.97551918611  
LOC390364 36.0144420013819 42.4493032770053 36.6522278218553  
38.745552403895 35.6434124419782 36.8059561571675 46.8613212048981  
39.0620487644635 42.8036731479932 40.5090849993014 41.8168470823451  
42.2577689927563  
LOC390367 43.4626049853157 40.5400384479766 46.2625470410195  
52.6947911480086 46.5557478175976 43.1826328292558 40.3302268293707  
42.5435283762933 44.5303781239209 43.2988017098387 45.2265319826548  
38.8495095797881  
LOC390372 46.441301934328 41.554942319225 38.1421709520616  
44.9370339275041 45.1137938810047 45.3882138838137 41.9393838138203  
44.6107027295193 46.4861258030402 46.0119912782855 44.553780984244  
46.7182294568603  
LOC390378 37.4554876386402 45.0115870036541 41.437237454134  
42.6913548400127 35.9058393060637 37.2686490268265 41.0381860307445  
41.9315419791594 43.1805016690297 36.5806287103157 43.0971787292711  
41.3481355128089

LOC390387 39.7342718293432 38.3322849790657 40.7256433650856  
39.1302941526825 38.5512429290626 41.4186558780356 40.4359177791566  
38.1835938174625 38.4344387289956 39.5247003943252 36.5359455830388  
38.9074189954657

LOC390414 46.7293238583888 58.7460488758053 41.1367478979484  
43.9282059368202 38.3561682218911 42.2577689927563 40.5585676679482  
42.9301944191913 39.5806465938526 47.0055981216687 52.104880481326  
43.0930293831497

LOC390427 38.1169703906207 37.4772922422734 37.9482157381008  
42.8235313007746 41.2424637338424 40.1930209223556 39.0458123429605  
37.5511560880902 34.8552366193358 37.0320432433314 38.9240290061433  
38.0958223740111

LOC390466 154.265252491184 207.30460556799 270.303708972854  
169.723009455614 176.861690566909 216.699423864285 187.656257079035  
137.555275829874 198.742148437738 109.922909644299 112.13936276116  
241.08817915181

LOC390483 42.2455707947223 41.7337506166619 41.9666541498638  
40.1804147506786 39.2608760193011 47.8636003588181 45.8980298854198  
44.6107027295193 46.4164127487052 42.9866214102525 43.0971787292711  
45.0985088502363

LOC390507 41.9407041937973 43.0227387991135 44.7829632472754  
41.3027031037343 37.4470183315826 41.8613406887824 40.7910160811527  
39.4710743516517 40.5912213523345 40.8970401536578 47.5439485437351  
40.2669497398702

LOC390530 42.0532901689036 35.9305494063137 36.6522278218553  
48.4916117779992 40.8873907150245 36.2015763253919 43.4544762830742  
34.9580369221164 43.1805016690297 37.5343260962758 40.3452320167286  
37.0953622406687

LOC390531 37.2474303302343 40.5400384479766 43.401782064778  
32.6817359372544 39.7568367479301 36.6271061451613 36.9355798143571  
39.7509165247419 36.4476883897928 32.9981302187884 38.8507804383261  
37.3600014814388

LOC390547 44.0328992213727 43.9421822132391 37.5597671487621  
43.9282059368202 41.5668884168669 43.8582747295766 54.4934782594218  
39.4710743516517 40.7847110517594 38.957687788868 44.7114813656401  
42.0424641526302

LOC390551 36.8072833828297 39.3999056968598 41.437237454134  
33.3231576795423 38.1644569189523 40.5281496800812 35.0305278582179  
34.064698871541 37.6383530120621 38.3092241935352 39.9070785037411  
40.8681871019812

LOC390561 48.5835484742456 48.5905518770847 39.0775870687758  
42.8235313007746 49.8304479381623 40.4359177791566 50.3519150282938  
41.5464765641928 43.9450023643394 43.6033221838149 40.9157352260901  
38.745552403895

LOC390564 40.0557788909923 37.8217989841918 37.2838080935695  
36.890925044696 39.4693871570028 38.5252456306656 39.1539892144371  
38.6454098044474 36.3649677956953 39.0648733099061 37.9230440150891  
34.6720534245631

LOC390570 53.3059058105836 39.9697332660833 40.8420925848403  
39.9697332660833 43.1252272136667 38.4330755397458 42.4939802311136  
39.853866204927 40.4997186069494 36.3612409063792 40.0766543123257  
39.8497227447888

LOC390594 37.55264801907 35.9305494063137 36.769073068743  
36.4564050256915 41.3755760434934 37.9003288112261 34.2773859804062

38.079222289614 35.7973685350741 35.6208308220005 36.0481934423077  
36.449101775775  
LOC390595 38.0089018744739 30.3554137634399 35.5220586859301  
33.3231576795423 32.2133093774284 30.8824580894159 38.5066108855005  
33.6816578730693 34.9428206949566 36.9102644736882 31.859589438824  
36.064718696392  
LOC390667 43.0001432913058 42.5269793679335 38.7745734037492  
42.2496337895968 39.0564222526273 39.132725377815 43.0930293831497  
40.7311497914871 42.8036731479932 39.4710743516517 39.0550139257658  
49.0655215909632  
LOC390669 38.385865183581 39.3999056968598 41.8751578329365  
41.1886975241176 35.0181575202066 41.554942319225 48.6395795163502  
40.2382908228517 41.6616444147804 38.8507804383261 40.9157352260901  
40.2669497398702  
LOC390683 42.8036731479932 44.3529919625344 34.0382693188794  
35.8472302065546 44.2607789091176 40.244271403831 36.8369172900902  
38.5457716679071 40.0403898620771 39.5637454855233 43.401782064778  
35.8429598823818  
LOC390688 46.8141313516997 41.159706131351 44.3344900481112  
38.745552403895 38.3561682218911 40.3357777530419 41.253645578517  
44.5029690493211 42.2577689927563 44.4652605017595 40.6373400186325  
42.2577689927563  
LOC390705 54.0170817319522 52.0770287673248 52.3432130135266  
43.4410741327254 50.0173461659833 55.7197525213035 72.4651758215622  
101.888001006345 53.0357938671646 50.4234835272833 61.0094935318105  
54.2677073532779  
LOC390712 38.5007204246293 46.8954576545929 42.5406888281114  
50.2163892855092 35.5220586859301 37.7000400506818 36.4098694708483  
40.931294690669 38.8271346375425 32.7876527533679 36.9060997041453  
37.1747156131306  
LOC390714 32.742439449766 36.0366673493555 36.8730514568925  
39.5050383901884 36.9702228618069 38.3418933808844 35.2163900400329  
40.1474543172332 40.4997186069494 42.8936990772838 36.8282383070068  
40.3691324547049  
LOC390738 37.4554876386402 34.2618170189676 35.6139301508335  
44.7980740332174 41.6806984441849 36.6996187567892 37.4772922422734  
43.1567024035183 38.7298222155532 42.6793753550854 39.9070785037411  
38.8495095797881  
LOC390748 43.515290338756 42.2114134935898 43.8153459269057  
38.5707420487455 42.6022652963326 40.1428591998404 42.629412460409  
38.3684202018524 39.8048943625718 43.2988017098387 43.8002456102021  
40.1700117452801  
LOC390760 44.3355304829989 37.4540772310118 39.1799070031819  
35.49696651597 42.3685136297603 44.4619248757502 49.6872467499977  
39.853866204927 38.3418933808844 39.9948390976317 45.1432412071268  
38.3291713594599  
LOC390811 42.8036731479932 45.0905928998779 47.2055133646385  
43.8002456102021 44.6834648302383 45.8325181856483 40.2154497375715  
43.4544762830742 42.7150227340364 42.9866214102525 42.8263096141654  
37.1747156131306  
LOC390829 40.8681871019812 39.8695929627783 43.8495248991589  
42.9358255168086 42.269054475455 42.8598805316863 40.4359177791566  
43.3262148375525 43.6670755115848 51.3351387089044 46.6442692119997  
39.1553169409075

LOC390846 44.436995101921 42.7775752471711 44.696023817801  
50.0526763693329 42.0709558258414 41.3553369544097 45.6042625176633  
41.7419877611072 43.2761454096265 45.1569741609597 48.4717951775049  
44.7401523707775  
LOC390856 43.844855336215 45.0905928998779 42.7303139017786  
45.5869891570251 38.3561682218911 41.6590564937735 49.540449125788  
41.9315419791594 43.3744503319109 50.3388505346542 45.0589947942306  
47.2131144508464  
LOC390874 38.304249186058 46.6996902348633 35.8265993915844  
41.4273122914951 41.6806984441849 39.2248354955045 42.4939802311136  
35.6825474397235 38.1169703906207 36.0481934423077 36.5359455830388  
37.8490162439785  
LOC390876 53.7507429765038 48.0296332183129 42.0621425894624  
55.0604256312495 46.4343327861696 44.0804700754786 48.1747307200218  
59.1107691694766 44.0519245668737 62.6984594468418 55.3942006156899  
51.5741598315033  
LOC390877 39.0620487644635 43.3458769998118 40.7620472083159  
42.357910063876 39.7568367479301 43.5752393599169 51.3064929551674  
46.1673159982664 43.5669306063196 43.1839109702714 44.4688999098904  
41.3481355128089  
LOC390880 42.2455707947223 42.0709558258414 45.7968648044613  
38.745552403895 40.3452320167286 42.9695585740813 33.9750800030909  
40.1474543172332 40.3316153483289 48.4890615340603 42.0750889188255  
41.2437378488025  
LOC390933 46.0920218698606 42.6939394537076 46.614092935749  
39.9084621723809 46.8674366115656 47.5733603903505 42.7431359850339  
44.6107027295193 40.6503965580437 43.781101409552 42.3413611855132  
45.2783024981315  
LOC390956 50.8388984085636 43.7644428186265 43.1931731665131  
43.3078542962968 46.1804647841331 40.9506062495231 46.1634822993009  
43.5544347011646 39.9444191873552 41.7405682794166 44.0409178714232  
47.0130468198828  
LOC390975 40.2543341073001 42.1607322031054 43.0971787292711  
44.9370339275041 43.5544347011646 37.5887129572848 47.8947595316832  
45.9604707098953 43.6670755115848 47.7180816682562 47.7535797917441  
44.7401523707775  
LOC390998 36.2496364442264 36.1232327599945 39.2707964550441  
41.3027031037343 39.1650142708257 44.4619248757502 37.9430145836712  
39.4710743516517 42.7150227340364 38.4187686307607 38.4689132737495  
40.8681871019812  
LOC391004 38.5648843914189 43.5873188565519 41.1367478979484  
41.3027031037343 40.0599807618105 42.157627240486 36.634024014558  
43.4544762830742 38.5252456306656 45.1569741609597 37.2892641289258  
45.0985088502363  
LOC391013 42.1679276329916 41.1212129940704 41.4613628725541  
41.0219290963778 39.9088079891223 42.9695585740813 45.3597029614942  
41.6916508480321 40.2274522635576 42.5664883002833 39.3667161654772  
39.0916553915607  
LOC391025 45.5758521267508 41.7337506166619 35.9305494063137  
49.9014504704021 42.0709558258414 41.159706131351 39.6535880152834  
38.5457716679071 40.4997186069494 41.3321861371202 39.7342718293432  
41.2437378488025  
LOC391033 42.5193208629123 38.9338521051669 47.0940613507321  
49.7350276169552 44.7829632472754 44.1737502492846 46.3057385979341

48.4670130605028 41.7627910693483 39.3698811593364 41.2598458726002  
41.1554481567603  
LOC391037 43.0001432913058 39.9697332660833 44.1452943804044  
44.0451487108213 47.4548471240051 43.3785777889265 40.2154497375715  
41.9315419791594 44.2607789091176 42.5664883002833 42.4580504587581  
38.745552403895  
LOC391045 52.8427643366617 53.3683962805281 34.1806289878747  
113.783910320605 45.6895223823001 50.4022543872993 43.6753843488695  
38.956280281655 42.2577689927563 39.6719190054379 33.6902293666089  
36.7762265039864  
LOC391092 41.8409927585705 40.6380495994768 41.3366779545815  
40.7481155008596 39.4693871570028 34.9849896310235 42.1607322031054  
40.2382908228517 40.137818555383 40.8970401536578 39.153226699662  
35.5523662009011  
LOC391124 43.0930293831497 41.9894412416874 47.9035532886869  
50.2163892855092 43.7517118200398 45.0882356578404 47.2927436772465  
38.745552403895 44.3440839686558 44.6918600441328 43.401782064778  
43.7672102682067  
LOC391157 37.1485601150873 48.109747794187 45.2313723727673  
38.745552403895 38.5512429290626 40.040778349137 39.3585350448719  
39.2672712041774 42.4540072551568 39.1621898366355 34.7308008643142  
40.0557788909923  
LOC391165 34.5886782974123 34.9262464079777 38.3166554965434  
38.6414316877471 37.2567512265363 36.9060997041453 37.830876898596  
39.6474008369935 37.6383530120621 38.4187686307607 33.4071187618571  
27.0325093564553  
LOC391209 40.9558083259517 42.8542642792862 43.7630587657205  
47.481302504066 38.6454098044474 36.0306975524309 39.8695929627783  
40.7311497914871 41.6616444147804 46.441301934328 34.8383995317036  
38.0452862258803  
LOC391241 37.7384958256497 37.6383530120621 39.8299340037009  
35.8472302065546 38.0598374201407 41.0582900711341 42.0605906240248  
40.1474543172332 41.2870505273664 42.4594149893798 39.8184668132023  
37.3600014814388  
LOC391269 45.3872406432794 47.765848710116 43.3085358214154  
36.7892997857376 50.5110359971301 47.0940613507321 48.3411413510851  
45.2806199505029 45.5779686360641 44.4652605017595 45.0589947942306  
44.4475838947656  
LOC391276 41.2424637338424 41.554942319225 39.7411455670172  
44.7980740332174 41.9842695818285 46.574682061365 43.9450023643394  
43.4544762830742 42.357910063876 39.1621898366355 46.8954576545929  
39.6352613956998  
LOC391282 41.0970259989281 38.5252456306656 41.3366779545815  
37.4642807402741 42.6022652963326 37.2018803984555 37.4386615664066  
38.8495095797881 38.2215591930186 42.9358255168086 43.5258090162298  
41.8200132437731  
LOC391322 43.5710871617107 40.0527893189096 43.3085358214154  
43.3078542962968 43.844855336215 40.8634043028528 45.3597029614942  
43.9366081640576 40.137818555383 45.0155543555707 46.0095710163378  
46.1592873342534  
LOC391347 40.4639532172338 44.2105195734073 46.5650556481721  
44.4367387274922 40.2449343247539 41.3553369544097 44.6032218589199  
41.1575777497576 38.4344387289956 45.1569741609597 38.956280281655  
42.8864415494484

LOC391352 46.0023068797812 46.4385386401326 43.0971787292711  
46.8954576545929 50.5110359971301 40.650742261428 47.7390230243778  
44.7044140979108 43.3744503319109 44.3648993568405 47.299647867533  
47.6040671292013  
LOC391358 43.2724556187214 40.716553247236 41.3366779545815  
41.4273122914951 46.3150221024046 37.3799542961839 43.3262148375525  
44.8997235283254 43.1805016690297 41.9666541498638 38.745552403895  
45.3763275588341  
LOC391378 39.5676051939342 41.159706131351 41.1367478979484  
42.2496337895968 42.269054475455 41.7627910693483 41.8315602975157  
41.3506832276112 42.992884918158 41.9666541498638 43.0016969050339  
46.2625470410195  
LOC391427 44.1294459089314 40.716553247236 46.2625470410195  
44.0451487108213 45.3675390992851 41.554942319225 48.6395795163502  
40.1474543172332 40.8970401536578 46.5650556481721 38.4689132737495  
36.8690774823319  
LOC391429 39.5676051939342 38.9338521051669 42.4580504587581  
39.6292788039793 39.859345745831 41.3553369544097 42.8684958525042  
34.1806289878747 42.992884918158 33.1559412791294 38.745552403895  
43.5738557773903  
LOC391475 48.3814421939888 43.8495248991589 49.8344973836834  
39.7411455670172 48.3814421939888 48.3686935595826 44.4639405506967  
53.838484549134 46.2027193115397 48.6124127998952 42.7275315121163  
44.5432192783161  
LOC391509 38.8561375693335 43.3458769998118 45.6989664108554  
37.29566077996 38.4540849632254 37.3799542961839 37.2892641289258  
41.4508241771315 38.8271346375425 36.5806287103157 39.4410515050885  
36.449101775775  
LOC391555 42.6036491382658 45.0905928998779 38.5045333213784  
40.4359177791566 34.9062568194127 42.6575535390785 45.3597029614942  
47.2864663693787 47.3791873993182 46.6598879466655 41.4508241771315  
44.3521099857368  
LOC391574 41.6354649482853 46.7591817286632 45.8844325913247  
41.8778873678551 37.4470183315826 38.9378717994178 43.4544762830742  
42.9301944191913 36.0741672064298 41.7405682794166 44.7926323492519  
43.3744503319109  
LOC391609 44.3355304829989 39.0894172982439 30.3888349004556  
38.3166554965434 39.0564222526273 38.8336427948187 39.1539892144371  
39.3709357615493 42.0621425894624 36.2435874904689 36.6298807161755  
33.0217499673686  
LOC391656 912.757335169259 1167.25317435052 1223.01485352248  
1390.12380748446 903.756866967447 1582.45600339543 728.257836227637  
1305.35453202355 1043.26325848938 1426.87261062373 1366.59129560817  
1881.7281441986  
LOC391692 49.7827734675743 46.2286164776607 45.5883690965192  
42.4580504587581 55.3100442506299 44.4619248757502 58.5087296620514  
51.6660481331154 44.1519466943185 44.1379638573455 52.6960621424156  
48.8670821164567  
LOC391703 42.6036491382658 43.0227387991135 48.1331309338997  
45.5869891570251 45.1137938810047 50.3245489035833 41.1507980856436  
44.1311654985682 50.1603795873336 43.0919221375514 43.5710871617107  
47.1060577218993  
LOC391722 48.1952521496489 41.554942319225 43.0971787292711  
42.9358255168086 40.8873907150245 45.6129956328415 41.706879587091



43.6434576713809 40.2274522635576 39.7835513496873 44.0409178714232  
41.863927676552  
LOC391727 39.5676051939342 39.9697332660833 41.437237454134  
44.550322123994 41.3755760434934 41.0582900711341 45.7452456977857  
40.1474543172332 43.8482802038826 40.4136535208406 40.6373400186325  
44.4475838947656  
LOC391730 41.6354649482853 39.0894172982439 38.8775560911841  
36.5393857306744 41.6806984441849 40.1428591998404 35.2163900400329  
32.8834169462007 34.0382693188794 38.745552403895 39.9070785037411  
41.2437378488025  
LOC391742 40.9558083259517 45.0115870036541 43.7630587657205  
42.2496337895968 37.3508690072156 40.4359177791566 49.1067959632109  
38.2782436497441 42.4540072551568 43.4885245598939 49.0361180089431  
45.8546719310325  
LOC391761 42.7150227340364 40.6380495994768 41.6079958749402  
56.0794100106654 40.2449343247539 41.7627910693483 41.5817737564592  
38.3684202018524 41.5635499110307 38.745552403895 41.3553369544097  
38.5279745308203  
LOC391766 36.8072833828297 35.7393138893354 40.931294690669  
39.9697332660833 43.1252272136667 40.040778349137 45.223075311113  
44.293922970134 38.9006788676407 41.4397539024976 38.956280281655  
43.9541718254769  
LOC391767 42.0532901689036 42.3550738181144 39.7411455670172  
37.29566077996 43.2484996523549 37.1317006162938 46.7100796279384  
35.7973685350741 37.6383530120621 40.5090849993014 39.9070785037411  
49.9692385479389  
LOC391770 42.0532901689036 47.5647821785529 48.7039705048129  
44.1483976313959 46.9906120932727 42.9695585740813 54.8074655158941  
50.3082459161777 51.2776048338 39.7835513496873 44.9713479185144  
46.6397391251762  
LOC391771 42.5193208629123 41.554942319225 41.437237454134  
44.550322123994 44.147557390293 42.4580504587581 44.7255207589606  
40.931294690669 41.5635499110307 47.2299678280724 42.0750889188255  
44.7401523707775  
LOC391811 1169.14891282789 1149.02954135912 1357.41745370754  
529.650395907046 2215.01815680371 1159.77262479002 1408.59798540643  
1726.90584784425 2108.03351084959 1151.25293766167 1197.13566108661  
1012.0373748933  
LOC391817 43.1805016690297 44.7829632472754 47.2962360458401  
47.481302504066 46.3150221024046 34.9849896310235 44.2166118829877  
46.4672637826582 44.2607789091176 49.3000844711116 42.0750889188255  
45.3763275588341  
LOC391859 46.5549623118323 42.9358255168086 45.063792968927  
43.1847628331565 47.8075998240396 43.0860383229288 50.6774883370457  
48.5681478665796 44.619512785899 45.7911932481722 44.4688999098904  
41.5536168238478  
LOC392145 46.0023068797812 47.9128504683618 46.0727230219512  
50.5310598656998 57.0504111569238 46.7800033479223 51.9421032049606  
49.3880946790306 52.1186591838715 49.4006068471301 46.0905079010237  
45.7562276914441  
LOC392196 42.9104454767916 40.148780650831 41.9666541498638  
34.5425384901279 34.7018263647985 38.3418933808844 37.3799542961839  
42.6450179841129 34.0382693188794 37.2089297656361 35.4386677371439  
40.0557788909923

LOC392197 43.1805016690297 43.5873188565519 44.1452943804044  
42.9358255168086 43.7517118200398 40.040778349137 46.3057385979341  
43.3262148375525 41.2870505273664 46.8954576545929 44.4688999098904  
41.863927676552

LOC392215 41.2424637338424 40.8880530359822 39.3709357615493  
39.066284740632 41.9842695818285 41.8613406887824 44.8643898647322  
42.157627240486 40.7847110517594 44.0409178714232 42.170702295259  
40.0557788909923

LOC392221 43.5710871617107 39.5050383901884 37.3687900733549  
42.9358255168086 43.2484996523549 50.2163892855092 40.0052661202207  
39.7509165247419 46.8873421271259 39.6719190054379 43.0971787292711  
45.2783024981315

LOC392232 42.442231667357 38.0226905622357 41.3366779545815  
39.5050383901884 39.0564222526273 40.1428591998404 41.0381860307445  
40.1474543172332 36.9060997041453 44.2580151149956 43.5710871617107  
43.6753843488695

LOC392262 40.7609952437622 40.5400384479766 38.5045333213784  
34.8137085420423 41.3755760434934 36.6271061451613 43.5627649099623  
39.7509165247419 46.1101825640108 41.6373771565199 41.3553369544097  
34.9138625012006

LOC392275 39.9255915839379 41.8848959280916 40.047314525032  
44.7520317855773 42.6022652963326 44.7030043309684 42.2577689927563  
39.8048943625718 41.0381860307445 41.9069736908705 43.917817324545  
42.57175366709

LOC392364 37.6397652536077 40.148780650831 40.931294690669  
49.1786207920603 43.4544762830742 44.2607789091176 38.4005795891396  
39.6474008369935 44.8003345643334 41.4397539024976 40.547835538778  
39.8497227447888

LOC392395 38.6454098044474 37.6383530120621 37.2838080935695  
41.6564075217517 39.1650142708257 37.9951997351435 40.3302268293707  
37.9837233601316 37.4540772310118 47.0055981216687 39.9899430628542  
44.7401523707775

LOC392425 41.7397731376692 39.6995529770239 43.401782064778  
38.2041059863839 43.4544762830742 38.9378717994178 37.1643693306382  
38.956280281655 41.6616444147804 35.93950183586 38.1835938174625  
34.3409660445447

LOC392440 41.2424637338424 46.3635803515159 50.9933795450314  
43.3078542962968 40.8873907150245 43.0860383229288 41.706879587091  
42.8482181313226 45.3756389170606 46.2286164776607 46.4205654140754  
45.0035308952466

LOC392447 38.0089018744739 39.1982470626863 42.0621425894624  
44.1483976313959 44.147557390293 36.2768299545794 36.08956004634  
41.2551966132486 38.2215591930186 38.528621456378 35.9563099719284  
36.9976231206067

LOC392467 40.0557788909923 42.2577689927563 43.0016969050339  
46.1673159982664 38.3561682218911 37.5887129572848 37.9430145836712  
40.931294690669 45.1899271235974 41.7405682794166 41.0050831223107  
40.8681871019812

LOC392481 44.7915315085948 42.3550738181144 41.437237454134  
41.8778873678551 43.4544762830742 42.357910063876 49.540449125788  
45.1714698794331 40.3316153483289 43.9450023643394 41.9083581529276  
37.5556299264699

LOC392489 42.7150227340364 45.2556760873335 43.7630587657205  
45.8844325913247 45.1137938810047 47.3791873993182 42.9803717121865

45.4757965005055 44.3440839686558 47.8207974930031 48.6767028205398  
43.3744503319109  
LOC392506 37.9387791625384 44.1239711172417 39.0775870687758  
44.4367387274922 42.3685136297603 42.6575535390785 46.3057385979341  
42.7431359850339 40.3316153483289 40.1179210534118 35.6970528713709  
43.3744503319109  
LOC392559 46.6348258763289 41.159706131351 36.2683886571585  
41.8778873678551 41.3755760434934 37.9951997351435 52.8496345990125  
43.7396619462033 37.10170285405 37.6383530120621 39.9070785037411  
42.1537476443423  
LOC392563 41.7397731376692 45.7979032939211 34.5718473203083  
41.4273122914951 43.1252272136667 37.9003288112261 41.5817737564592  
45.2806199505029 48.7358147030082 40.8049408996274 41.4508241771315  
39.7411455670172  
LOC392583 40.3478825593224 43.5873188565519 38.7745734037492  
44.4367387274922 41.5668884168669 43.0860383229288 47.7390230243778  
43.5544347011646 47.27543600687 41.6373771565199 40.0766543123257  
41.1554481567603  
LOC392617 34.6977013306396 37.6383530120621 40.1985790927248  
42.8235313007746 45.4751076037511 35.6125439901743 45.1017494688414  
40.831207953647 39.1790517315259 37.2089297656361 40.723990462047  
43.7672102682067  
LOC392713 46.9939712192224 65.2464683900404 64.9072331703985  
46.4555908533915 68.1674425673171 47.3791873993182 48.8319884367456  
53.2046867327331 51.1055541075029 49.7259371799014 48.6184776976167  
56.0477607422828  
LOC392781 42.9104454767916 38.3322849790657 40.301483914446  
36.6501141438378 43.5544347011646 39.2248354955045 36.197424053556  
37.4484310268909 39.2809305246091 37.1275334308172 36.2435874904689  
42.8864415494484  
LOC392843 44.436995101921 41.0678614026819 43.1629414479202  
41.6186264038868 43.4544762830742 40.6994262313917 41.7503755215516  
40.4359177791566 43.1235886043549 40.4136535208406 39.2907645923217  
45.2189250687483  
LOC392979 41.8409927585705 40.0527893189096 45.3974838013476  
43.1847628331565 39.1650142708257 43.6670755115848 34.2773859804062  
40.931294690669 43.5669306063196 43.401782064778 41.1638563416981  
43.4709415392696  
LOC393076 44.2350046179299 37.920964499903 45.2313723727673  
38.745552403895 33.5412189543102 47.2009420656854 42.2577689927563  
40.1474543172332 38.0213051227859 41.2276963324981 41.3553369544097  
39.5418280570561  
LOC399706 32.9174234020987 37.6383530120621 38.9790184198145  
43.8002456102021 39.6535880152834 38.3418933808844 47.2927436772465  
38.1835938174625 42.2577689927563 41.1222709786153 43.9450023643394  
39.7411455670172  
LOC399715 43.8654109265055 48.0654860391912 42.0621425894624  
46.0228732507872 43.1833429589719 42.6575535390785 44.4639405506967  
45.9090659324223 43.0496526069072 44.4652605017595 42.881371896984  
42.9887069977696  
LOC399744 75.8122107270212 55.5294887653184 65.5820437889838  
92.6230008876347 75.3580625318157 53.4466111440611 63.7721358300879  
63.7002949745101 53.2046867327331 59.2628513357357 53.4088637045445  
53.0446815750355

LOC399746 44.5282181324797 45.4143854024453 46.7508829977587  
37.4223289687135 36.6354013629791 38.9378717994178 48.1747307200218  
41.7419877611072 41.074824727477 38.2069499294002 40.0766543123257  
39.9519547348106

LOC399753 40.8091178323174 40.931294690669 40.4882741869718  
43.7517118200398 42.7463525131552 41.5173370741598 40.9607305725196  
38.6454098044474 40.6540338142433 40.8607340038818 40.5744172023514  
40.5303289242683

LOC399815 38.7537364570873 45.0905928998779 46.4569566520107  
45.0798408927912 48.9627346956003 42.4580504587581 48.6395795163502  
39.853866204927 48.6494451061637 41.9666541498638 44.6286581923295  
41.1554481567603

LOC399829 41.8409927585705 38.2263227947189 44.9758339877851  
47.9915414951747 42.9090346219023 36.8059561571675 37.2892641289258  
40.2382908228517 37.8319142847141 42.2614524730856 38.079222289614  
42.357910063876

LOC399888 44.2350046179299 48.1627097465883 40.301483914446  
42.9358255168086 39.6535880152834 113.839604953506 42.4939802311136  
46.8954576545929 48.0163377492228 71.7464249053513 47.9942520395434  
44.5432192783161

LOC399898 39.4710743516517 40.7952353240579 39.6451483836089  
42.1273928203021 39.5595233162192 46.8954576545929 37.830876898596  
42.7431359850339 43.7630587657205 47.9056710878325 40.6373400186325  
43.9541718254769

LOC399900 12456.731302703 5018.90384962952 5601.18872540083  
6749.14636741447 4820.70258471362 3905.8371644287 10351.5373412096  
14226.3743910711 4784.36905964712 11410.3307451176 14226.3743910711  
9852.7965902602

LOC399937 40.9999112795884 40.9731067463382 42.7909073846368  
40.5018032884134 39.1177164316495 41.0970259989281 42.8149277408658  
40.7311497914871 38.4866431306822 40.8600431177315 40.1341976911042  
36.7172300749476

LOC399939 38.957687788868 30.5239050647746 30.7315474127249  
36.6501141438378 34.3633615460307 38.1169703906207 33.8558232866797  
38.079222289614 36.197424053556 32.9003644440608 40.547835538778  
34.9138625012006

LOC399942 111.691813916343 178.961579489906 146.543232229227  
98.0023132593711 201.764909400617 156.636360703756 170.501116810593  
94.3773551105819 186.301404367238 53.9412154719864 56.6884575165011  
91.1363393944977

LOC399978 39.266565827316 39.0894172982439 37.3687900733549  
41.8778873678551 41.2740822675592 36.8059561571675 41.253645578517  
37.9837233601316 43.1805016690297 40.6022003765153 44.6286581923295  
42.357910063876

LOC400019 39.5676051939342 38.4330755397458 42.5406888281114  
43.074472921841 41.1868052124344 40.4359177791566 36.5352572191451  
43.844855336215 42.9020321355927 34.1648535095605 39.153226699662  
44.2527566343661

LOC400027 362.268767190535 459.92905629125 272.930242946726  
194.666769955149 304.777565078155 345.294930735691 306.174148874454  
392.622487173359 372.239177888445 351.188432232165 398.139730642919  
276.084235934753

LOC400095 36.6480005877129 38.3322849790657 41.8751578329365  
43.074472921841 37.4470183315826 38.4330755397458 40.5585676679482

42.157627240486 39.2809305246091 36.5806287103157 35.3362091871364  
39.5418280570561  
LOC400099 35.3227485563945 44.2105195734073 43.4709415392696  
40.1804147506786 48.6224651100733 40.4359177791566 44.9863726205428  
44.293922970134 34.3842972343227 40.3235655331796 42.2618615571566  
44.3521099857368  
LOC400120 50.0466349801009 48.5905518770847 54.9071823326024  
52.6947911480086 55.8173045043348 64.5187138759372 50.0088611244948  
48.0582855095143 54.4912806027381 57.4665857273093 52.3187919317561  
53.9431600945419  
LOC400145 45.1912496459517 46.2286164776607 50.2869791217819  
54.4586176399381 43.5544347011646 47.5733603903505 43.0930293831497  
45.7476095696859 47.9035532886869 44.571915452417 45.5707650534259  
47.8931773060789  
LOC400163 31.5599106749655 36.89524015739 39.8299340037009  
36.5393857306744 43.2484996523549 37.2686490268265 40.5585676679482  
32.4466419672036 32.2133093774284 45.0155543555707 37.3687900733549  
40.5703581862752  
LOC400174 41.0608773166058 37.5469247328848 40.931294690669  
40.4359177791566 43.7517118200398 47.4699236780425 37.9430145836712  
40.3357777530419 37.9273653326866 36.3612409063792 40.9157352260901  
34.5633623842083  
LOC400197 38.5007204246293 35.7393138893354 41.1367478979484  
40.7481155008596 47.3172462673426 44.5544727111028 44.3440839686558  
40.1474543172332 45.0017158586743 39.4710743516517 43.401782064778  
39.0536056496869  
LOC400214 48.3814421939888 55.6323803479191 66.9239565096247  
47.481302504066 58.5450868286167 45.6129956328415 60.0981687048269  
51.555506218204 80.7409247380392 73.8313212063649 55.9269493191353  
60.8662233098324  
LOC400221 38.5648843914189 39.7835513496873 35.4484652445078  
36.7892997857376 40.2449343247539 37.3799542961839 32.4466419672036  
48.4670130605028 40.137818555383 39.2623423164488 39.7342718293432  
36.6603338274678  
LOC400236 44.2350046179299 43.3458769998118 44.9758339877851  
45.334106390212 45.2556760873335 43.2805590023412 45.223075311113  
36.43924066428 42.7150227340364 38.6454098044474 43.844855336215  
40.8681871019812  
LOC400298 39.1590964332473 39.2907645923217 40.1985790927248  
39.2780515621926 40.2449343247539 36.1190722948669 40.5585676679482  
37.1317006162938 36.6312676076142 43.1839109702714 38.079222289614  
46.5650556481721  
LOC400299 41.5421429082231 42.7775752471711 44.1452943804044  
43.5627649099623 39.2608760193011 38.9378717994178 43.8206425661746  
39.0620487644635 40.137818555383 39.4710743516517 42.8263096141654  
41.6550823405646  
LOC400301 42.6036491382658 40.148780650831 37.3687900733549  
37.8442841690502 42.9090346219023 39.4953494583071 46.1634822993009  
44.2159020605784 43.7630587657205 43.844855336215 40.2649309204478  
34.3409660445447  
LOC400304 65.3531590366085 55.7405934254857 45.310660704531  
47.6687908290818 72.6675345946258 42.0574848021044 42.8684958525042  
61.7572675712557 48.5792058061372 73.8313212063649 55.1099824417989  
55.9555622193202

LOC400388 43.1805016690297 44.1239711172417 36.8730514568925  
40.4359177791566 42.7982502551634 46.8954576545929 47.1345949868029  
45.5581356216957 42.9020321355927 39.2623423164488 41.9908237694988  
42.1537476443423

LOC400406 84.9075858560758 89.0203733091224 83.2925226467532  
41.0726336841311 130.184962393833 61.7091923488929 62.5506324864207  
62.1934012861178 115.328304312071 54.7827221235949 52.104880481326  
43.1805016690297

LOC400455 528.840700144811 958.473187253938 999.496354673223  
475.881757842864 1180.7204565402 656.355333007615 676.672146226382  
536.73426937255 2146.1548633579 549.117045813593 634.226367147025  
672.515393219419

LOC400456 43.2724556187214 41.0678614026819 42.7303139017786  
43.7311594514862 39.5111866657136 40.5912213523345 41.4397539024976  
42.8978721487095 40.0403898620771 38.528621456378 42.1550412794904  
40.4220196471124

LOC400464 49.7188990489616 48.6447083765118 44.696023817801  
50.7774722329703 42.0709558258414 58.2531879680192 40.6750540874299  
42.7431359850339 38.5252456306656 50.1185085888209 51.8812208789107  
47.5540235065658

LOC400499 43.4626049853157 40.0527893189096 41.7419877611072  
69.734208465775 40.9416717019827 38.5707420487455 44.4639405506967  
41.2098211956301 38.8495095797881 39.5637454855233 38.1253290586431  
43.1805016690297

LOC400506 96.3232257371077 108.019575675653 104.832753086298  
47.8164193292842 119.965950077259 69.7677752398541 102.150058925164  
62.2982003555312 121.449647909665 52.6879797806876 60.0105984819248  
59.7999569757275

LOC400509 34.6977013306396 38.5252456306656 33.1559412791294  
33.8111782249716 37.1565984182084 35.8227939208521 39.5496902678788  
36.5393857306744 35.0305278582179 36.5806287103157 36.2435874904689  
34.6720534245631

LOC400578 112.271215367578 59.1107691694766 112.421316052392  
49.4742925789913 46.1513019317765 42.0847226073592 47.0874209746031  
93.4144098590192 63.5716064500377 46.6598879466655 39.3667161654772  
42.4229201717624

LOC400581 40.4639532172338 42.1607322031054 41.785676764591  
51.0175677516029 42.269054475455 43.9724628401189 46.4388841354122  
45.8669209716694 47.9035532886869 41.1222709786153 44.2142581488029  
44.9070250604284

LOC400590 44.5282181324797 47.2770121962655 50.1860191642359  
48.4916117779992 40.2449343247539 42.5660695551615 46.4388841354122  
42.157627240486 43.3744503319109 43.6033221838149 44.3763859390287  
39.8497227447888

LOC400652 48.1952521496489 39.0894172982439 39.7411455670172  
37.1894304543751 42.4864576619427 38.1169703906207 38.5066108855005  
39.3709357615493 43.6670755115848 42.1622837416589 39.9899430628542  
41.5536168238478

LOC400657 48.8941062980393 63.7721358300879 57.2107492415265  
82.7394574977114 47.6884372645373 71.9329028989527 48.6395795163502  
56.1404433602127 66.0350709576651 88.2056147099779 80.9821967801845  
83.9236799134394

LOC400682 38.7537364570873 44.3187284857534 40.931294690669  
42.5664883002833 41.7419877611072 43.1826328292558 41.5817737564592

40.4669141685209 42.1089765085639 38.1042454705119 44.553780984244  
43.1805016690297  
LOC400696 36.4564050256915 40.716553247236 38.8775560911841  
35.9521941716188 36.4434672195785 34.4896350146096 35.0305278582179  
37.33030683349 42.9020321355927 33.7883338848419 34.4716904283753  
37.3600014814388  
LOC400707 44.1294459089314 39.2907645923217 38.1421709520616  
41.1886975241176 41.8806343997257 40.650742261428 40.4359177791566  
40.047314525032 41.7627910693483 39.7835513496873 40.4504608195666  
43.1805016690297  
LOC400708 48.1952521496489 41.6466169548846 39.4710743516517  
41.7614975630362 38.1644569189523 38.8336427948187 44.6032218589199  
46.2779564481158 39.2809305246091 41.1222709786153 41.3553369544097  
42.7782216342806  
LOC400713 88.3335649692467 112.659254685552 72.0243286940589  
74.6159297822533 50.8373208590626 53.4067392890495 138.100169316776  
84.5055910320032 68.1040271620925 104.763913120468 111.924999671217  
76.3334723210842  
LOC400721 7980.71309230447 5354.58328030315 6749.14636741447  
7476.94487791412 4632.08655821299 3343.07293372655 6938.87250165681  
11410.3307451176 4168.41947709165 8937.3846214861 8937.3846214861  
6819.74871209328  
LOC400723 41.8409927585705 38.0226905622357 41.2365089689635  
40.0698728584484 40.3452320167286 39.0266821712099 42.0605906240248  
38.4540849632254 40.0403898620771 40.1179210534118 37.0180934800573  
37.0953622406687  
LOC400752 44.5282181324797 40.8880530359822 44.0451487108213  
43.3078542962968 41.7929491793697 42.4580504587581 46.1634822993009  
43.844855336215 41.074824727477 41.8613406887824 43.0016969050339  
42.0424641526302  
LOC400759 46.5549623118323 50.0425298550559 39.8299340037009  
48.9944486068347 36.6354013629791 49.4157684139858 45.7452456977857  
50.1833483241864 40.9901805728485 43.7303813515864 43.6629145624937  
42.2577689927563  
LOC400768 37.9387791625384 45.4882438975269 39.7411455670172  
46.7577982595088 43.844855336215 39.4953494583071 46.8613212048981  
59.4674205670657 91.3362264594431 44.571915452417 40.723990462047  
42.0424641526302  
LOC400793 40.9558083259517 37.2810767789306 42.3536549114165  
68.8167148906225 44.4489662507893 48.0350549043063 50.0088611244948  
42.4580504587581 43.1805016690297 41.4397539024976 41.7272875295469  
40.1700117452801  
LOC400796 52.109723558511 40.148780650831 43.0016969050339  
44.9370339275041 42.4864576619427 44.2607789091176 43.0930293831497  
43.2551508830106 40.4220196471124 41.3321861371202 41.8168470823451  
48.27609330316  
LOC400807 41.8833988894167 36.7976562409506 44.8872784170036  
43.8495248991589 43.0723817756832 39.1664256481434 44.9094465483072  
42.4580504587581 40.7847110517594 44.3648993568405 40.8225507267584  
45.063792968927  
LOC400831 40.3478825593224 44.9370339275041 54.5191471810265  
46.614092935749 46.1804647841331 46.4648868771662 49.2546642180676  
49.5185112777773 44.8997235283254 44.0409178714232 47.7535797917441  
38.0452862258803

LOC400858 41.7397731376692 35.4484652445078 35.3649449469275  
38.5252456306656 40.5710637884029 44.2607789091176 36.9355798143571  
36.1375121409002 39.5806465938526 37.6383530120621 40.1742127891824  
45.2783024981315  
LOC400879 44.6231541342 54.3303422997961 68.9522412475296  
50.1185085888209 76.6160788176402 43.5752393599169 39.4916414839923  
51.6660481331154 48.4869909888679 38.4829727716328 44.1533327883807  
41.3948836161924  
LOC400890 216.063990451376 204.903470332387 177.261319004133  
187.601223003233 224.945809325258 173.391542207362 180.717886605217  
167.352766082239 286.68367978144 283.111920665176 209.87862540213  
224.509915754308  
LOC400891 34.8099089553046 31.3542159583213 40.6737160001291  
36.890925044696 39.859345745831 36.4986986135769 37.7136011474903  
39.7509165247419 36.0741672064298 42.9866214102525 38.5668610487033  
44.9070250604284  
LOC400927 46.0920218698606 42.8542642792862 44.8872784170036  
35.6027791404152 40.3452320167286 44.0804700754786 35.9894133432376  
41.4508241771315 40.8970401536578 40.4136535208406 40.8225507267584  
39.8497227447888  
LOC400942 38.385865183581 37.920964499903 44.0451487108213  
46.7577982595088 39.1650142708257 42.9695585740813 43.9450023643394  
44.8997235283254 37.9273653326866 44.4652605017595 42.2618615571566  
42.1537476443423  
LOC400948 596.384327208699 288.386446189379 356.503013319738  
407.063375756017 444.858305070415 387.999689038448 291.596692248591  
636.367246129079 296.532363090593 287.121456559795 338.108557083245  
546.287195443189  
LOC400950 37.1485601150873 46.29198852834 45.1569741609597  
39.853175885492 39.6535880152834 32.9046688061235 40.3302268293707  
42.0494116081998 42.6366765186182 41.6373771565199 39.7342718293432  
34.0382693188794  
LOC400954 35.6434124419782 40.0266778690352 45.7968648044613  
41.8291484190524 40.831207953647 38.7340969861754 38.7745734037492  
39.7509165247419 39.2809305246091 37.9661004970253 40.4995052849302  
42.1860813954352  
LOC400955 46.0023068797812 43.5182502375207 41.785676764591  
39.1706564265495 40.6723334103791 42.9695585740813 41.5817737564592  
41.3506832276112 42.2577689927563 45.4614234442527 44.2925355984056  
43.7672102682067  
LOC400958 50.8388984085636 42.5269793679335 47.0940613507321  
46.1673159982664 48.9627346956003 47.2927436772465 48.6395795163502  
58.8022152133979 51.1055541075029 48.6124127998952 50.3221380889396  
53.655233033193  
LOC400963 4948.93803183911 12125.3293116195 11795.0477101407  
5696.39636379286 10617.4323014458 7022.41612496714 7323.77427153966  
3884.2191293028 7075.82842238887 7785.77078492993 6749.14636741447  
8259.38594893529  
LOC400965 43.9309845324767 43.0971787292711 41.3366779545815  
45.5869891570251 49.0828761839116 41.6590564937735 40.0052661202207  
43.4544762830742 46.2027193115397 45.6868589181768 39.7342718293432  
43.6753843488695  
LOC400968 46.7293238583888 34.3715326040967 35.7105247506212  
35.6928955245309 37.956732373465 40.244271403831 34.9344532055397



34.5886782974123 34.2973261206803 34.2638875325204 29.8304689114955  
36.6603338274678  
LOC400986 43.7164681443605 44.2630383225933 41.554942319225  
55.32276041402 39.9283177178222 42.9695585740813 50.911342328268  
55.6904617926772 38.6510172759977 40.5571841955033 46.201352759435  
42.8864415494484  
LOC401002 38.7537364570873 40.5400384479766 42.9104454767916  
42.8235313007746 39.3667161654772 50.5148383400703 38.5066108855005  
40.6171774724171 38.4344387289956 35.93950183586 33.5370783156523  
41.5536168238478  
LOC401010 40.2543341073001 51.8610060995363 45.310660704531  
43.367124590178 53.4109882045447 48.3686935595826 58.2957814921605  
60.7942162859036 53.3094843669564 56.8875898013449 51.8812208789107  
45.5800840647989  
LOC401019 4093.70002166179 5811.22276358172 5246.60459228386  
3575.78813099057 5895.03230740197 5636.93532853955 5696.39636379286  
4948.93803183911 5177.04105968809 5895.03230740197 6186.45345364665  
5018.90384962952  
LOC401052 87.6178717341967 78.258486366912 125.690995228055  
64.5347406608537 71.8706847571669 85.6038071277319 73.4820932957859  
75.7947206223934 58.8201021345225 88.8568707880669 67.3976855661302  
68.8529879402902  
LOC401056 51.6558970571712 46.4385386401326 44.7829632472754  
44.0451487108213 45.4751076037511 40.7616966228404 51.7714254834195  
66.7530718914083 40.5912213523345 40.8049408996274 44.4688999098904  
48.6037684272115  
LOC401068 44.3355304829989 46.6314009405034 45.310660704531  
43.5627649099623 40.3452320167286 39.3841861812262 44.6032218589199  
46.2779564481158 42.992884918158 43.1839109702714 43.7585538437696  
41.0657892043496  
LOC401072 46.8954576545929 42.6022652963326 37.7384958256497  
50.8567345921473 49.9493230064613 39.2985791324641 45.7452456977857  
45.1714698794331 36.9060997041453 34.8137085420423 42.7275315121163  
46.6397391251762  
LOC401074 38.6454098044474 97.2803806915572 56.410923639913  
41.8778873678551 96.143327683221 52.4351670989268 81.0331497830643  
50.0526763693329 126.63987648161 52.4351670989268 51.9302027391447  
54.720204938924  
LOC401087 41.6354649482853 42.4493032770053 38.1421709520616  
45.1944222548351 38.745552403895 34.7983399096627 41.4742337714895  
41.7419877611072 44.619512785899 39.7835513496873 41.0808257270221  
34.3409660445447  
LOC401093 51.1740855632044 47.4076235350059 47.0940613507321  
42.9358255168086 51.2525124735102 199.937572174194 46.3057385979341  
49.5185112777773 45.6582729799009 111.248876636045 71.0369238830779  
238.246319539302  
LOC401097 39.5676051939342 34.15544299189 37.0642268327439  
37.9875302985336 39.6535880152834 42.157627240486 38.6243997507646  
40.931294690669 40.9901805728485 36.9102644736882 34.9428206949566  
39.7411455670172  
LOC401101 39.4710743516517 44.5884811528117 43.3085358214154  
41.5464765641928 45.2556760873335 38.7340969861754 42.1607322031054  
40.047314525032 38.8271346375425 43.7303813515864 41.1638563416981  
41.0657892043496

LOC401115 734.705859548078 1273.52492984569 289.909646207746  
990.431472174705 1445.73674428909 400.8670859408 1083.50383916482  
1171.207937488 1634.61795848352 262.679844527518 428.515605971056  
418.693470287372

LOC401131 36.3649677956953 37.920964499903 41.3366779545815  
47.8164193292842 38.3561682218911 38.1169703906207 35.1307934330047  
37.2237132058632 41.5635499110307 42.0621425894624 38.4689132737495  
45.3763275588341

LOC401137 37.7805366040928 38.861780967827 43.5420658412177  
38.9074189954657 39.528971131769 37.0180934800573 39.9559575274857  
39.4223544019653 40.137818555383 40.7063426028871 38.6335676551747  
39.8497227447888

LOC401152 262.327538467461 286.497342437243 193.380035526465  
399.733432664718 240.975885654236 757.257495810249 217.848539722853  
239.569514501529 174.985336606027 549.67905283016 646.323419285676  
358.083401917765

LOC401164 47.9175508887533 42.4493032770053 43.7630587657205  
40.7481155008596 41.467005949568 45.1873487463472 39.8695929627783  
46.3685439301234 42.2577689927563 49.5265949137207 44.8872784170036  
46.917149434588

LOC401180 51.1740855632044 45.4882438975269 45.0985088502363  
48.9155368657318 49.2267897689452 52.004662119923 47.9665737016961  
46.1159021593282 48.7646976789783 49.9085372049438 47.6388115824631  
45.3267183347084

LOC401206 9938.5091387622 9326.9018948838 10617.4323014458  
9582.11974031559 11795.0477101407 11176.402230735 7911.19531717602  
9709.60940482862 10483.5643876539 11176.402230735 11410.3307451176  
13656.2581082905

LOC401218 93.9756797434207 74.0039764902057 70.4794854241035  
85.3754356809649 164.997214765625 110.312681023811 117.962374539153  
106.78552222475 104.516141143655 74.3981029634178 86.2670415958076  
60.6653636336244

LOC401220 41.6354649482853 39.6123051184545 38.5045333213784  
38.8495095797881 37.4470183315826 36.3845892764084 42.2577689927563  
35.0510338774593 39.3750969348308 36.2435874904689 38.1835938174625  
36.9976231206067

LOC401222 38.0089018744739 40.148780650831 39.6451483836089  
35.6928955245309 38.3561682218911 42.750861693377 36.634024014558  
40.047314525032 45.1899271235974 48.2596564318071 34.5633623842083  
42.7782216342806

LOC401233 93.9756797434207 64.8903340853337 37.8386378737561  
71.1583251698218 126.204310123186 59.4949177415847 40.7910160811527  
62.5528124447176 89.3342384381684 48.8623729374733 43.1931731665131  
49.7336769474446

LOC401237 46.7293238583888 43.683792219729 37.4642807402741  
42.2496337895968 46.3150221024046 49.8472708021525 64.8367546135053  
71.408876667815 43.5669306063196 45.6868589181768 44.0409178714232  
47.3172462673426

LOC401238 50.0466349801009 81.2182827624857 85.0946882743418  
74.8706881113318 70.0133734659853 46.3715909653832 55.9276266345493  
50.5070012045444 61.2510119532409 46.6598879466655 52.6960621424156  
52.3896785600751

LOC401242 45.2875173643252 37.3634897565502 45.063792968927  
37.9875302985336 41.3755760434934 42.4580504587581 42.357910063876

43.1567024035183 41.3803269429468 42.5664883002833 42.6366765186182  
38.4330755397458  
LOC401252 38.1672336230186 37.920964499903 39.4250105372135  
34.9849896310235 37.6119337673806 38.9378717994178 34.6720534245631  
38.956280281655 37.7805366040928 40.3235655331796 42.170702295259  
35.4484652445078  
LOC401268 33.4240466670776 38.2263227947189 36.2683886571585  
36.264823544143 38.4540849632254 39.2985791324641 35.6056062164318  
41.8417024632349 35.9645119596869 38.957687788868 37.2018803984555  
36.9976231206067  
LOC401280 40.8681871019812 45.0115870036541 43.9450023643394  
48.665578118898 39.1650142708257 46.8954576545929 48.0283573444179  
44.293922970134 47.3791873993182 46.441301934328 46.3370338074996  
42.0424641526302  
LOC401284 42.3433931248155 44.8529259387308 42.8270038153139  
43.9282059368202 43.7517118200398 45.9266745571724 40.7910160811527  
39.2672712041774 45.7452456977857 48.4890615340603 38.079222289614  
48.9733758107788  
LOC401286 39.4710743516517 36.6968906669565 39.5450079747895  
38.9534635879195 46.3150221024046 41.8613406887824 41.8315602975157  
43.0390857698452 38.3418933808844 44.3648993568405 43.5710871617107  
37.8490162439785  
LOC401296 45.6517320730042 48.0296332183129 45.1569741609597  
50.2163892855092 43.9450023643394 49.8472708021525 42.7431359850339  
43.2551508830106 51.5229124652769 44.6918600441328 48.2050207071554  
46.7182294568603  
LOC401305 44.8914371498528 37.8217989841918 42.640829914102  
42.2496337895968 49.32293280121 41.8613406887824 47.4439407315335  
34.8949555140527 41.2870505273664 40.3235655331796 47.3791873993182  
43.5738557773903  
LOC401317 45.3872406432794 40.5400384479766 42.4580504587581  
51.3851157261451 45.4751076037511 96.9739786719591 59.1774824918359  
49.085741080241 41.5635499110307 45.4614234442527 50.5810338885769  
52.0359304386476  
LOC401321 195.482216656634 73.3950348855139 88.1797799963114  
83.6935756500468 70.5676924620725 71.7585486695516 85.8154958329408  
92.227126770051 121.907038320974 114.533239859288 94.0777119695783  
98.6039579639704  
LOC401351 44.2350046179299 37.5469247328848 46.8267540220952  
43.074472921841 42.9090346219023 42.9695585740813 42.357910063876  
38.079222289614 41.3803269429468 47.3791873993182 39.9899430628542  
39.1553169409075  
LOC401354 45.0985088502363 47.9665737016961 42.8270038153139  
38.3166554965434 40.5710637884029 45.3882138838137 46.7100796279384  
37.6557714476853 43.7630587657205 43.6033221838149 43.3085358214154  
47.3172462673426  
LOC401357 98.5746416750459 82.0682043421788 140.030757545662  
148.529482776555 115.970093171058 72.5752072120178 84.9863403576284  
65.6914955077809 74.3902189072372 81.4621222177298 63.3717459766798  
74.7557519831859  
LOC401358 42.5193208629123 45.3486182278177 47.2962360458401  
45.5869891570251 49.8304479381623 36.8059561571675 40.7910160811527  
42.2577689927563 44.3440839686558 43.2988017098387 42.357910063876  
40.0557788909923

LOC401387 36.8072833828297 40.716553247236 37.2838080935695  
32.4383992781552 41.5668884168669 37.1317006162938 39.3585350448719  
42.2577689927563 38.3418933808844 39.8873706855774 38.5668610487033  
35.8429598823818

LOC401397 496.303918649238 483.416873464931 570.824732318332  
473.688869614777 559.9670724278 552.162906190653 329.978705095448  
433.447319956981 485.139076884109 255.559793355361 298.14782785085  
569.966632625157

LOC401398 40.7609952437622 37.2810767789306 37.7384958256497  
41.1886975241176 38.745552403895 35.8227939208521 37.3799542961839  
34.6977013306396 40.2274522635576 38.957687788868 39.2542963855807  
40.0557788909923

LOC401399 45.0985088502363 41.3610369241157 38.7745734037492  
40.3180310664156 36.2048942610546 40.7616966228404 46.7100796279384  
38.5457716679071 37.9273653326866 42.5664883002833 41.0050831223107  
45.7562276914441

LOC401410 38.385865183581 42.0709558258414 41.528370959196  
36.890925044696 39.5595233162192 39.2985791324641 42.0605906240248  
34.9580369221164 40.5912213523345 44.0409178714232 43.401782064778  
42.357910063876

LOC401431 51.0225132036905 45.0115870036541 45.1569741609597  
46.3203995372658 48.1473938886239 49.2050538150106 56.9320717885002  
52.5098795466615 58.0722340887264 53.9412154719864 49.1067959632109  
46.7182294568603

LOC401442 40.0557788909923 35.5310164682026 40.1985790927248  
39.9697332660833 37.0526522140242 34.8956628705329 39.2533668167483  
34.4896350146096 39.6609238036815 37.8217989841918 38.8507804383261  
37.3600014814388

LOC401447 39.4250105372135 41.0226232127351 44.5544727111028  
42.6222445667107 42.1386542162789 40.1428591998404 43.9450023643394  
40.9861485852278 41.7627910693483 43.4885245598939 40.2649309204478  
38.0089018744739

LOC401497 48.8333989709933 43.4396866157171 47.4740726032707  
50.8567345921473 49.5666074434383 44.9896851005259 39.5496902678788  
52.407151732257 50.9010149857308 41.7405682794166 45.0589947942306  
45.1735152121056

LOC401498 39.3709357615493 41.8848959280916 42.3536549114165  
40.646702696033 42.6022652963326 38.9378717994178 39.8695929627783  
39.853866204927 43.1805016690297 43.4885245598939 39.4410515050885  
38.6454098044474

LOC401507 33.3307770183871 38.1312950900467 34.6977013306396  
29.9775071862804 40.148780650831 35.9305494063137 34.806104801006  
36.9355798143571 34.4716904283753 35.8304004211528 34.064698871541  
33.4316681623175

LOC401525 46.9939712192224 47.6229101519945 55.094385444315  
44.265834798964 47.9128504683618 44.6524308640784 55.0897019602305  
68.4659783447092 41.863927676552 42.8936990772838 42.5426057453993  
49.904979214379

LOC401589 42.8671710538782 41.9894412416874 38.738305958734  
47.0874209746031 42.9627566278041 43.9421822132391 42.6981470312295  
40.781946829774 41.9635525160083 42.1151315286226 42.7275315121163  
42.171601283248

LOC401620 43.4626049853157 37.1685072112618 41.3366779545815  
34.8137085420423 35.9894133432376 34.4896350146096 31.4474799869345

31.7063377004409 40.3316153483289 37.1275334308172 43.0016969050339  
36.2582325396375  
LOC401622 57.4376528157926 50.8114699212931 56.4779645313958  
49.1786207920603 41.3755760434934 48.260931742163 50.5252048155459  
57.2350830635912 48.8842909466002 63.3872214856708 56.0477607422828  
52.4992300612807  
LOC401623 42.7150227340364 47.2770121962655 44.1452943804044  
43.8002456102021 39.859345745831 42.6575535390785 50.6774883370457  
52.5098795466615 43.5669306063196 44.7958122466628 43.3085358214154  
42.2577689927563  
LOC401629 42.5193208629123 41.4508241771315 41.0356368374708  
51.3851157261451 42.6022652963326 48.7781962164988 53.4921736109774  
41.9315419791594 47.798305839406 43.1839109702714 43.401782064778  
43.3744503319109  
LOC401630 44.8914371498528 40.148780650831 40.301483914446  
39.066284740632 42.0709558258414 41.9543948167375 39.5496902678788  
41.5464765641928 41.9635525160083 45.6868589181768 39.0550139257658  
42.6758568421347  
LOC401677 41.8409927585705 42.2577689927563 43.9450023643394  
46.3203995372658 39.9697332660833 53.4466111440611 46.4388841354122  
40.1474543172332 42.357910063876 46.7646877499666 48.1352470945488  
59.0894921452893  
LOC401703 41.1523487516364 43.0227387991135 43.1931731665131  
54.1240583139871 41.8806343997257 39.3841861812262 41.8315602975157  
42.357910063876 42.1594905198929 38.745552403895 42.8263096141654  
48.6795178347248  
LOC401720 156.976072444343 71.7215348945466 52.8041782638549  
62.6048727240291 52.2089306840125 44.6524308640784 53.4921736109774  
61.130286531713 46.6944238390932 48.6124127998952 41.5421429082231  
41.3481355128089  
LOC401778 39.0620487644635 40.5400384479766 42.2577689927563  
44.9370339275041 43.004943518025 46.574682061365 39.8695929627783  
42.2577689927563 39.4762546236449 45.2556760873335 40.8225507267584  
40.9683275553869  
LOC401845 45.6517320730042 529.650395907046 64.9839099669442  
616.265771322835 44.147557390293 49.2050538150106 55.9276266345493  
52.7787010032051 40.8970401536578 41.4397539024976 37.8372168909583  
44.6484005362281  
LOC401860 37.55264801907 41.3610369241157 40.4070046183108  
39.066284740632 41.3755760434934 41.9543948167375 39.8695929627783  
45.8669209716694 37.5469247328848 37.8217989841918 41.9083581529276  
45.1735152121056  
LOC401876 46.9939712192224 44.4411734611229 43.1931731665131  
47.0874209746031 48.5000946421718 44.4619248757502 39.8695929627783  
42.7431359850339 45.0997987980157 53.1993028936883 42.4580504587581  
45.0035308952466  
LOC401895 37.8386378737561 37.7384958256497 39.4710743516517  
39.3750969348308 45.5809132232681 44.0804700754786 43.0930293831497  
40.2382908228517 47.6195009345747 42.6793753550854 37.3687900733549  
42.1537476443423  
LOC401911 41.5421429082231 41.4508241771315 41.6079958749402  
39.7411455670172 52.5645416722441 41.4508241771315 44.2166118829877  
42.157627240486 41.6616444147804 42.4594149893798 42.0750889188255  
39.8497227447888

LOC401914 43.1805016690297 45.9266745571724 42.7303139017786  
45.1944222548351 43.7517118200398 42.5660695551615 45.223075311113  
40.4359177791566 45.8325181856483 45.4614234442527 44.2142581488029  
47.6040671292013

LOC401915 43.9309845324767 40.716553247236 35.4484652445078  
36.7892997857376 40.4639532172338 40.9506062495231 37.3799542961839  
46.2779564481158 36.197424053556 38.1042454705119 42.2618615571566  
41.2437378488025

LOC401923 36.9060997041453 37.6383530120621 36.8730514568925  
36.3604951341921 40.4639532172338 37.0180934800573 39.6535880152834  
34.9580369221164 35.2143190355414 36.3612409063792 31.7413650507468  
42.8864415494484

LOC401934 40.2543341073001 38.4330755397458 43.0971787292711  
48.9944486068347 42.4864576619427 46.6872654833579 45.4799270968969  
46.2779564481158 44.4395580493118 42.8936990772838 47.299647867533  
44.2527566343661

LOC401957 36.5393857306744 37.6383530120621 42.3536549114165  
40.9607305725196 38.1644569189523 39.9397419279057 37.2892641289258  
38.745552403895 42.0621425894624 42.4594149893798 44.0409178714232  
41.0657892043496

LOC402057 1478.26733379357 1693.5377672895 1173.47285626656  
1698.18614771363 2337.7738990994 1881.7281441986 1712.55038816005  
1557.42399344934 1411.12613289991 2122.39240932934 1917.90025587049  
2405.8635632802

LOC402066 63.1291723738553 50.1027491117756 47.0055981216687  
63.6334154351075 53.6907197364586 52.1024135605001 61.5000955267432  
54.1731035633439 59.4236178078244 51.1169368198437 52.3761286517985  
53.2046867327331

LOC402096 39.6609238036815 36.9994058279362 34.806104801006  
41.3027031037343 34.5301949364147 33.0463640202858 41.5817737564592  
32.229154316188 41.7627910693483 30.9403229851671 32.8881500803623  
34.4570158133896

LOC402100 43.0930293831497 42.6022652963326 40.148780650831  
40.7481155008596 38.4135023167287 45.9980734733005 41.9918605927928  
41.4812544772644 43.5669306063196 40.2615278292875 45.9725715538987  
41.9083581529276

LOC402110 45.4799270968969 38.5252456306656 44.0451487108213  
36.890925044696 44.2607789091176 35.4142595025086 35.9894133432376  
41.1575777497576 38.3418933808844 45.2556760873335 41.4508241771315  
37.8490162439785

LOC402117 35.7012997405508 40.5400384479766 39.3709357615493  
38.4208429103799 42.3685136297603 39.2985791324641 39.3585350448719  
42.4580504587581 38.4344387289956 39.0648733099061 39.9899430628542  
40.5703581862752

LOC402145 37.2474303302343 35.7393138893354 43.6670755115848  
38.8495095797881 36.7356360093603 37.1317006162938 42.7431359850339  
46.8954576545929 41.2870505273664 42.3606390470387 44.2925355984056  
38.6454098044474

LOC402160 40.2543341073001 38.3874422458351 40.439898672334  
39.1335009052403 42.039525923161 43.5752393599169 39.2010256871265  
41.1575777497576 40.2615278292875 40.1179210534118 43.7585538437696  
42.4229201717624

LOC402176 57.7877627794725 52.8264142735929 50.8303921211581  
65.524821699432 42.0709558258414 48.8744644207821 38.4005795891396

47.2864663693787 50.3245489035833 60.8730416435467 54.1963147679251  
55.3563533836982  
LOC402198 38.5648843914189 37.6383530120621 37.7384958256497  
39.1706564265495 33.6330903323612 30.7058829591553 34.806104801006  
35.3608605269276 34.226171989766 36.5806287103157 29.2731027042641  
31.7413650507468  
LOC402199 40.3478825593224 41.7337506166619 33.6816578730693  
37.1894304543751 40.2449343247539 42.357910063876 34.806104801006  
34.8949555140527 42.0621425894624 43.0919221375514 37.8372168909583  
34.0382693188794  
LOC402217 41.3387790895716 38.7344853699576 43.1931731665131  
38.2041059863839 41.7929491793697 42.6575535390785 48.3411413510851  
37.1317006162938 42.357910063876 40.8049408996274 41.2598458726002  
38.5279745308203  
LOC402221 238.647490689325 192.632227878708 195.672836308456  
265.520773157991 207.768377497439 323.453481668415 161.793366042179  
157.281394920992 207.18510695093 109.525921548011 139.385367339095  
248.414210905199  
LOC402232 47.1962846565261 41.2598458726002 42.0621425894624  
45.1944222548351 37.956732373465 54.7083331985678 40.9157352260901  
43.0390857698452 40.3316153483289 60.9905272201951 43.844855336215  
43.8575940017119  
LOC402251 1136.88710104691 1537.76265834076 1932.2647526188  
1257.19844370057 809.577874019028 2650.09507972593 740.994425128952  
986.40790007743 1080.43016747082 1126.31998762007 1645.71527614542  
2357.96534075689  
LOC402269 40.3478825593224 38.8336427948187 44.696023817801  
40.646702696033 46.0043807840705 45.1873487463472 40.9157352260901  
45.2806199505029 48.6494451061637 42.0621425894624 43.1931731665131  
46.3411353377615  
LOC402279 32.406093465115 34.0382693188794 31.7645650530049  
35.6928955245309 36.5393857306744 38.5252456306656 32.2133093774284  
35.2642250366721 31.1401844809132 36.8059561571675 35.9563099719284  
32.8921051249019  
LOC402282 43.1805016690297 41.6466169548846 49.8344973836834  
53.2046867327331 45.4751076037511 44.1737502492846 39.7576136507593  
47.4740726032707 41.6616444147804 41.7405682794166 45.7328341667151  
46.917149434588  
LOC402377 38.5007204246293 45.2556760873335 43.8495248991589  
52.8502823653368 43.844855336215 41.9543948167375 46.1634822993009  
46.8954576545929 46.4164127487052 41.2276963324981 44.8872784170036  
47.1060577218993  
LOC402382 39.1590964332473 45.0905928998779 45.2313723727673  
46.4555908533915 39.2608760193011 36.6271061451613 42.7431359850339  
43.844855336215 46.3203995372658 43.2988017098387 44.2925355984056  
43.6753843488695  
LOC402457 45.9090659324223 45.2556760873335 35.9305494063137  
37.0732977341185 43.4544762830742 41.2567470068038 39.6535880152834  
40.2382908228517 43.6670755115848 43.9450023643394 37.2018803984555  
38.745552403895  
LOC402483 41.8409927585705 44.2630383225933 40.301483914446  
38.5252456306656 44.9936360641969 36.9060997041453 42.0605906240248  
33.2467975244196 45.4799270968969 46.2286164776607 42.170702295259  
38.4330755397458

LOC402508 40.148780650831 38.5252456306656 39.1799070031819  
43.1847628331565 43.6587492470348 41.9543948167375 43.6753843488695  
43.4544762830742 46.2027193115397 47.9056710878325 42.357910063876  
45.6692241948108  
LOC402509 101.211796615204 51.9421032049606 48.8100349749783  
49.1786207920603 100.90948905426 50.4022543872993 61.3620062177524  
78.3542840447759 86.0735583144514 44.8997235283254 53.4921736109774  
50.7487159427973  
LOC402538 39.6609238036815 32.4552405279874 41.3366779545815  
42.5664883002833 41.9842695818285 37.8102105794655 37.7136011474903  
40.6171774724171 35.3227485563945 34.2638875325204 38.956280281655  
44.4475838947656  
LOC402560 52.4179224871914 47.3536182445315 45.989212296035  
50.8567345921473 44.6834648302383 113.839604953506 46.7100796279384  
48.272324215504 44.0519245668737 60.4837400912239 60.6505672212119  
81.7566533443175  
LOC402562 36.5393857306744 36.3110701990588 38.1421709520616  
46.614092935749 43.004943518025 48.4758590019384 42.629412460409  
37.7612949798895 43.7630587657205 42.8936990772838 32.5482839399637  
41.9430737035925  
LOC402569 40.5654775358427 37.5469247328848 36.5474283500601  
41.3027031037343 38.3561682218911 35.8227939208521 35.3362091871364  
34.3865306339645 37.6383530120621 38.1042454705119 40.4504608195666  
37.9607839934735  
LOC402571 41.4508241771315 38.7344853699576 38.1421709520616  
44.7980740332174 42.9090346219023 39.9397419279057 45.7452456977857  
38.745552403895 47.3791873993182 46.6598879466655 46.0095710163378  
43.0930293831497  
LOC402573 43.5710871617107 49.0697565324841 48.2883694323339  
43.6726153508978 46.0977687311222 41.8613406887824 44.3440839686558  
43.2551508830106 44.1519466943185 34.064698871541 41.6336636285875  
40.8681871019812  
LOC402617 45.9090659324223 37.3634897565502 49.2041300973417  
39.6292788039793 40.3452320167286 41.6590564937735 40.6750540874299  
41.9315419791594 43.0930293831497 43.7303813515864 48.3847843498476  
46.917149434588  
LOC402634 33.1666036387511 39.9697332660833 33.4240466670776  
34.5425384901279 38.2496050953547 33.5578650644246 34.806104801006  
34.064698871541 35.0305278582179 31.1401844809132 36.7283081422707  
36.1647506311964  
LOC402635 30.7315474127249 43.2649781354792 36.8730514568925  
30.7315474127249 33.5412189543102 36.9060997041453 34.2773859804062  
36.6452480995946 34.8552366193358 40.8970401536578 36.8282383070068  
36.8690774823319  
LOC402641 45.1912496459517 40.0527893189096 37.8386378737561  
50.2163892855092 45.6895223823001 40.8634043028528 43.0930293831497  
44.797320243931 37.8319142847141 39.9948390976317 41.1638563416981  
52.4992300612807  
LOC402643 38.8561375693335 35.0222940937513 44.696023817801  
38.3166554965434 35.5220586859301 48.0350549043063 43.1931731665131  
42.357910063876 39.9444191873552 39.4710743516517 37.2892641289258  
42.7782216342806  
LOC402644 105.739423435604 125.027865666372 108.512469038407  
99.4184778430267 168.883366756191 111.404796541459 134.567947469561



94.6432868887401 236.791729190996 68.2708120569221 67.2575005672188  
115.814483757002  
LOC402665 40.6559419616644 36.2103905554984 43.1931731665131  
46.8954576545929 41.0885562160946 44.2607789091176 42.8684958525042  
43.0390857698452 39.9444191873552 40.7063426028871 40.8225507267584  
46.2625470410195  
LOC402670 45.8108990837624 46.4861258030402 43.3085358214154  
50.378948785456 45.9104478407175 41.9543948167375 53.8687221233237  
39.4710743516517 42.5406888281114 40.2112371512838 43.4709415392696  
46.4499258373233  
LOC402677 45.8108990837624 44.5884811528117 49.4573631027613  
46.614092935749 52.3242437351389 41.8613406887824 43.8206425661746  
43.4544762830742 46.0106098064475 48.0211752672327 50.8826620053386  
54.5921287593554  
LOC402679 43.2724556187214 46.7591817286632 42.3536549114165  
43.9282059368202 43.1252272136667 42.6575535390785 41.5817737564592  
45.2806199505029 43.9450023643394 40.3235655331796 40.2649309204478  
50.5511827666954  
LOC402693 48.8941062980393 44.4411734611229 43.0971787292711  
43.8002456102021 43.3332476888305 41.8613406887824 40.6750540874299  
43.0390857698452 47.0804681460898 48.6124127998952 42.911855821602  
36.7762265039864  
LOC402694 880.992328229414 1483.40077183826 1645.71527614542  
1313.92053019421 2689.80835574654 2440.77408185413 1845.34855798442  
854.712488657987 1337.53997230271 1978.16092853485 1783.87583818834  
2178.59848996529  
LOC402715 43.0001432913058 39.1982470626863 44.8872784170036  
40.1804147506786 42.4864576619427 37.0180934800573 53.3111230705754  
41.2551966132486 40.4997186069494 39.3698811593364 44.1148826235374  
40.7704587752083  
LOC402716 41.0608773166058 41.159706131351 33.553634633839  
36.3604951341921 34.806104801006 39.0266821712099 42.0605906240248  
39.1652965788406 42.4540072551568 37.4302011516587 37.3687900733549  
40.1700117452801  
LOC404266 48.6621527194963 44.9370339275041 43.4709415392696  
36.1562979552173 43.004943518025 44.9896851005259 46.1634822993009  
43.6434576713809 47.3791873993182 43.1839109702714 46.5650556481721  
43.8575940017119  
LOC407835 152.441506175141 167.982626899395 185.312851727212  
175.529493306927 274.493399403322 189.267281390459 167.872060678879  
171.205726660714 247.843927763772 189.80672643731 187.656257079035  
115.544036763985  
LOC439914 41.1523487516364 37.5469247328848 40.301483914446  
39.853175885492 35.0181575202066 35.314469458379 34.9344532055397  
37.6557714476853 40.7847110517594 38.528621456378 41.8168470823451  
34.6720534245631  
LOC439936 39.0620487644635 33.3643994200057 36.0306975524309  
35.6928955245309 30.9891979286442 33.2552842693684 37.0564573649223  
34.4896350146096 30.1079759183823 37.4302011516587 32.1218888714537  
39.0536056496869  
LOC439945 45.6517320730042 42.9358255168086 43.9450023643394  
52.8502823653368 44.0451487108213 40.8634043028528 42.4939802311136  
46.1673159982664 43.6670755115848 47.4767851750188 46.0905079010237  
44.7401523707775

LOC439949 41.8409927585705 60.808065997635 57.2107492415265  
66.9218519793499 63.686652234709 45.8325181856483 53.1884505015411  
48.0582855095143 104.341160312305 54.6089451252049 59.6608518093582  
53.4735821194294  
LOC439951 35.5179217192467 41.2598458726002 38.4043916290561  
46.0228732507872 40.8873907150245 44.6524308640784 45.3597029614942  
41.5464765641928 39.3750969348308 45.9004543328976 46.972521499515  
40.9683275553869  
LOC439957 43.9309845324767 39.7835513496873 36.9795961564828  
45.7397504535169 37.4470183315826 38.7340969861754 40.7910160811527  
39.0620487644635 40.4997186069494 36.9102644736882 41.7272875295469  
39.0536056496869  
LOC439965 34.3473914754963 35.2143190355414 39.5450079747895  
34.2080003860523 28.4576210094757 31.2812535042976 35.3362091871364  
39.1652965788406 34.8552366193358 36.9102644736882 34.4716904283753  
38.745552403895  
LOC439985 37.6397652536077 41.159706131351 46.3411353377615  
49.3654837541353 43.4544762830742 44.1737502492846 49.8281348927244  
44.1311654985682 42.0621425894624 44.7958122466628 44.3763859390287  
40.5703581862752  
LOC439992 38.0089018744739 47.8400694856726 40.5734458834617  
58.9168466928565 48.0234896130991 41.8613406887824 39.4600924554505  
57.445796273665 45.6582729799009 47.4767851750188 43.0016969050339  
51.3244198342335  
LOC440005 36.0144420013819 32.9795880920156 31.8679959015659  
32.6817359372544 39.9697332660833 36.6271061451613 34.6720534245631  
32.6039814489621 40.3316153483289 37.2089297656361 36.7283081422707  
39.1553169409075  
LOC440013 43.3085358214154 39.0102066700839 43.0016969050339  
41.1523487516364 41.5335058664597 42.2006337556379 41.294200401933  
40.6628537260412 41.2397693523949 41.0529409675663 40.5061122751948  
42.7303139017786  
LOC440030 44.6231541342 137.197328985851 65.9476039189301  
46.614092935749 133.38594323309 56.8505380943422 77.4046818339539  
48.3590401011623 115.221134337342 48.4890615340603 46.0095710163378  
48.1627097465883  
LOC440053 42.8036731479932 39.0894172982439 37.4642807402741  
40.3180310664156 41.2740822675592 37.9951997351435 34.3633615460307  
40.2382908228517 40.6957787921451 36.3612409063792 38.6662194645633  
38.6454098044474  
LOC440055 731.071171171638 716.434968700383 812.386878774445  
801.351998609551 802.036670929858 953.143041145545 511.527348356071  
410.623529765253 559.763116301175 671.959673037066 657.031980628955  
1370.76188322111  
LOC440059 38.8561375693335 37.6383530120621 42.4580504587581  
44.265834798964 43.2484996523549 38.6414316877471 38.8417151851134  
43.2551508830106 40.7847110517594 40.8970401536578 39.8184668132023  
40.5703581862752  
LOC440067 39.1590964332473 43.0227387991135 37.1643693306382  
52.6947911480086 44.7829632472754 37.2686490268265 39.3585350448719  
42.5435283762933 39.9444191873552 46.2286164776607 39.3667161654772  
43.5738557773903  
LOC440080 40.6130792100165 38.2916414828356 41.437237454134  
40.4359177791566 39.0916553915607 38.0698669928229 43.1563544904505

42.4864576619427 39.853866204927 38.824202251002 38.8193634966943  
39.8497227447888  
LOC440082 35.1307934330047 42.1607322031054 43.401782064778  
39.853175885492 41.8806343997257 42.2577689927563 48.4859552186772  
42.4580504587581 35.6970528713709 49.1928206164702 44.8872784170036  
40.3691324547049  
LOC440092 46.1673159982664 41.159706131351 37.3687900733549  
39.1706564265495 39.4693871570028 40.5281496800812 38.941855825269  
35.9023742468744 35.860430241131 39.1621898366355 38.6662194645633  
41.6550823405646  
LOC440093 230.142262693206 355.495119544081 355.04502859751  
516.349618186681 192.666532389331 296.842555066902 384.080719411412  
213.118335449552 346.029336456779 125.321349772971 207.568343362834  
265.930422462959  
LOC440104 45.3872406432794 42.6939394537076 57.2960245538881  
40.4359177791566 38.2496050953547 42.5660695551615 41.5817737564592  
43.4544762830742 43.7630587657205 45.6868589181768 41.7272875295469  
46.3411353377615  
LOC440105 38.8561375693335 39.1982470626863 40.4882741869718  
35.9521941716188 43.6587492470348 39.7394181011603 44.0687697278114  
40.831207953647 43.0930293831497 41.3321861371202 37.2018803984555  
36.7762265039864  
LOC440131 41.1523487516364 39.7835513496873 41.0356368374708  
45.1944222548351 39.9697332660833 43.3785777889265 39.8695929627783  
43.9366081640576 43.5669306063196 39.2623423164488 39.8184668132023  
40.3691324547049  
LOC440132 43.4626049853157 42.6939394537076 42.640829914102  
51.3851157261451 41.5668884168669 44.2607789091176 41.8315602975157  
42.6450179841129 42.6366765186182 40.1179210534118 39.3667161654772  
40.8681871019812  
LOC440145 74.0913177754682 64.8903340853337 55.2141529491512  
73.5834042105313 60.2886873195135 49.9699131196797 61.5000955267432  
56.8595344107711 72.4220552950926 63.197604174872 60.7231725808886  
63.5295088521896  
LOC440157 112.977333058979 186.818097299665 187.147252401703  
79.5838979704243 276.550265506988 81.3978207813439 66.0350709576651  
152.17335005192 276.59189773139 107.610858427836 113.879493668284  
85.5175308034109  
LOC440160 67.6011992144113 86.4898752526885 71.4473248804357  
44.6905691366696 107.646103699516 58.4435847520801 42.2577689927563  
77.3999378505514 80.2112932898502 41.0057887014368 43.7585538437696  
60.0940570991178  
LOC440225 41.9407041937973 40.3384318592985 39.9519547348106  
38.6414316877471 40.2449343247539 38.4741160538511 38.977631784251  
37.33030683349 40.137818555383 42.2614524730856 36.1812049498986  
42.1860813954352  
LOC440226 48.0201377454632 46.6996902348633 47.9035532886869  
43.074472921841 41.467005949568 47.5733603903505 45.7452456977857  
42.2577689927563 38.9006788676407 48.1392888470269 48.7502645382856  
42.4607795638552  
LOC440233 37.8386378737561 41.2598458726002 35.5220586859301  
47.0874209746031 38.5512429290626 34.3887641786747 40.2154497375715  
33.7818132446042 41.074824727477 36.0481934423077 38.745552403895  
34.3409660445447

LOC440248 44.7915315085948 42.4493032770053 48.6037684272115  
40.4359177791566 46.6397391251762 48.260931742163 48.9826868640753  
38.8495095797881 44.4395580493118 37.8217989841918 44.2925355984056  
44.2527566343661

LOC440258 45.6517320730042 43.7644428186265 41.9666541498638  
100.344513700137 43.4544762830742 39.7394181011603 40.4359177791566  
45.7476095696859 49.3780606970538 55.9283039581662 47.6884372645373  
50.0571060701893

LOC440261 42.5633441928261 45.6875030164879 44.4612332327353  
47.4159345253437 44.0935187723459 45.8844325913247 44.2688720583707  
45.0478115350159 44.6809101024392 44.0784174571411 42.2523463964673  
44.4912617551615

LOC440268 41.3387790895716 37.8217989841918 43.1931731665131  
40.3180310664156 42.6022652963326 39.7394181011603 37.6036146841933  
42.9301944191913 41.074824727477 40.4136535208406 46.0095710163378  
38.1421709520616

LOC440277 49.2595762436995 41.554942319225 51.223859150798  
37.9875302985336 40.5710637884029 41.6590564937735 43.8206425661746  
41.4508241771315 40.4220196471124 39.4710743516517 42.357910063876  
40.5703581862752

LOC440280 56.3471340054074 87.5666652975503 81.8648220673828  
116.295564219236 58.4383854340181 80.287662312208 54.1707158323527  
66.4207938873541 72.9752827496503 87.1434190022564 73.7873098190297  
96.3918711895208

LOC440287 40.6559419616644 40.9731067463382 33.6816578730693  
37.1894304543751 32.8704945047196 34.2773859804062 42.1607322031054  
31.0594903826598 40.4997186069494 38.6454098044474 33.5370783156523  
33.5578650644246

LOC440291 38.8561375693335 39.7835513496873 40.0998167098057  
43.074472921841 39.7568367479301 39.3841861812262 44.3440839686558  
38.4540849632254 39.1790517315259 40.5090849993014 37.3687900733549  
39.4490233720848

LOC440292 39.3709357615493 42.8542642792862 39.9101908547397  
44.6905691366696 43.844855336215 37.2686490268265 39.5496902678788  
42.0494116081998 44.8003345643334 40.5090849993014 42.170702295259  
41.1554481567603

LOC440295 38.5648843914189 38.8336427948187 45.063792968927  
38.4208429103799 41.7929491793697 36.8059561571675 42.4939802311136  
40.831207953647 38.7298222155532 35.4990901121893 38.1835938174625  
41.5536168238478

LOC440297 35.6111578834671 39.6995529770239 38.7745734037492  
42.6913548400127 43.9450023643394 41.0582900711341 44.3440839686558  
42.357910063876 42.1594905198929 39.3698811593364 36.0481934423077  
35.9604262434141

LOC440309 35.7012997405508 37.1685072112618 38.6727842796202  
44.550322123994 43.9450023643394 45.6129956328415 41.8315602975157  
43.9366081640576 44.0519245668737 38.2069499294002 39.3667161654772  
41.2437378488025

LOC440313 39.4710743516517 36.3110701990588 41.6977706798234  
45.0798408927912 43.2484996523549 43.5752393599169 39.0458123429605  
36.8400213077707 45.0997987980157 45.7911932481722 39.6403089864678  
41.1554481567603

LOC440334 41.8409927585705 41.8073910693411 41.437237454134  
48.665578118898 44.9936360641969 46.263826584899 48.9826868640753

40.831207953647 41.9635525160083 43.2988017098387 45.1432412071268  
43.9541718254769  
LOC440337 44.3355304829989 42.9358255168086 36.4564050256915  
39.5050383901884 46.0043807840705 39.8455060654531 41.4742337714895  
39.1652965788406 38.7298222155532 42.2614524730856 40.6373400186325  
45.6692241948108  
LOC440338 41.2424637338424 41.0678614026819 38.5045333213784  
38.745552403895 35.6434124419782 37.8102105794655 35.7055410599146  
38.6454098044474 41.4636047919453 35.93950183586 39.2542963855807  
35.4484652445078  
LOC440341 285.459248157609 271.813877560354 300.845404774478  
199.181938253995 276.360065404067 210.437554813031 105.945216149549  
200.958421322871 155.435700005184 237.4882538723 148.906660152784  
185.963572053301  
LOC440345 83.014860007187 66.4207938873541 108.366007746533  
160.566474370004 90.8550873130713 62.7889102917857 87.7918574811458  
162.598623692126 58.3912728421768 139.945446129591 166.431392410887  
143.173898886465  
LOC440348 160.187478921145 117.706922397135 125.137803364368  
110.112236384679 204.200566808626 147.269661124015 171.623830248512  
298.031228833741 125.494065483032 218.819478568299 101.888001006345  
87.1109435144663  
LOC440349 62.5036823572932 76.2193772627406 110.849159638833  
72.3607760798558 78.7320333941149 59.4949177415847 57.7805922926828  
55.4919197421746 61.0506827768127 55.6865353018811 71.2915496628252  
74.7001528966639  
LOC440350 50.4872122867759 55.5294887653184 118.951970882732  
35.8472302065546 55.0031529299037 58.2531879680192 45.8980298854198  
48.4670130605028 50.7619345314571 50.0564735608363 53.8856501960117  
51.9447450229707  
LOC440352 46.8954576545929 46.4861258030402 50.3950981988762  
59.2778887402357 40.5710637884029 46.574682061365 50.5252048155459  
47.9942520395434 47.798305839406 47.7180816682562 43.401782064778  
45.2783024981315  
LOC440354 86.754538970161 103.934830132715 81.3364476638024  
101.560929859785 110.649342465555 98.1371527802953 122.405413080836  
112.733531624555 80.8728961146267 66.1406655359732 77.1317865202676  
94.9831937714438  
LOC440356 42.3433931248155 41.554942319225 44.0451487108213  
41.8778873678551 41.7929491793697 47.2009420656854 39.7576136507593  
34.2814697823693 41.863927676552 42.785429206422 43.4709415392696  
44.7401523707775  
LOC440359 495.26603220907 547.072513229674 708.005870621064  
507.498146970824 431.864508795316 810.201903561366 429.725397949276  
349.096725048776 511.261925898948 338.966238813782 393.337170271481  
738.66912772732  
LOC440361 40.4639532172338 38.0226905622357 36.9795961564828  
41.3027031037343 42.7107928951766 39.3841861812262 37.9430145836712  
37.1317006162938 35.6970528713709 35.4990901121893 37.2018803984555  
34.4570158133896  
LOC440368 39.0620487644635 42.8542642792862 36.769073068743  
39.6292788039793 43.004943518025 42.2577689927563 38.4005795891396  
38.8495095797881 41.1742244762318 42.0621425894624 38.4689132737495  
35.5523662009011

LOC440386 41.0608773166058 35.6434124419782 41.437237454134  
43.9282059368202 44.7829632472754 45.9266745571724 43.9450023643394  
41.8417024632349 45.1899271235974 44.1379638573455 42.0750889188255  
40.4639532172338

LOC440389 48.8333989709933 43.3458769998118 45.3974838013476  
48.1662933382789 41.5668884168669 60.2867996701867 44.4639405506967  
41.6466169548846 47.4699236780425 60.9905272201951 42.170702295259  
46.3411353377615

LOC440396 41.7835997867848 44.4758281923423 41.1367478979484  
40.1249533205858 41.4397539024976 39.7394181011603 47.4439407315335  
42.7431359850339 46.4569566520107 41.4397539024976 44.2142581488029  
43.0930293831497

LOC440402 36.2496364442264 38.2263227947189 40.1985790927248  
43.074472921841 41.6806984441849 37.0180934800573 46.4388841354122  
45.1714698794331 47.0804681460898 36.5806287103157 36.8282383070068  
39.4490233720848

LOC440407 37.1485601150873 40.7952353240579 39.5450079747895  
49.1786207920603 39.0564222526273 41.2567470068038 45.223075311113  
40.1474543172332 40.8970401536578 43.1839109702714 34.064698871541  
37.1747156131306

LOC440414 40.148780650831 35.4484652445078 40.8420925848403  
44.6905691366696 37.7576900881741 40.8634043028528 47.2927436772465  
44.8997235283254 43.2761454096265 42.3606390470387 40.8225507267584  
44.2527566343661

LOC440421 35.4287975493553 53.2046867327331 65.8455652907556  
46.7577982595088 44.0451487108213 43.3785777889265 45.7452456977857  
47.7889447429963 50.6750785584772 44.0409178714232 42.357910063876  
48.27609330316

LOC440422 40.5654775358427 45.9732108120834 40.439898672334  
43.1275490164761 43.2907292669418 37.33030683349 41.4742337714895  
45.9104478407175 39.2809305246091 36.8770258597925 40.4504608195666  
41.4508241771315

LOC440434 40.6559419616644 41.9894412416874 44.4311655729487  
41.5464765641928 41.0885562160946 46.1513019317765 41.5817737564592  
41.4508241771315 42.8036731479932 39.1621898366355 41.7272875295469  
44.8372404608604

LOC440438 43.844855336215 39.5050383901884 41.9666541498638  
41.8778873678551 42.3685136297603 41.8613406887824 42.357910063876  
42.8482181313226 39.1790517315259 43.1839109702714 40.0766543123257  
36.1647506311964

LOC440456 41.3785995857154 44.2630383225933 45.7390891160787  
43.9806719678066 41.2365089689635 41.9069736908705 42.357910063876  
47.5543691541633 41.0476065156912 40.7568164083581 45.3597029614942  
42.6758568421347

LOC440491 39.6609238036815 38.8336427948187 43.5710871617107  
42.8235313007746 43.6587492470348 46.263826584899 45.1017494688414  
45.1714698794331 44.7058233759912 44.4652605017595 45.9104478407175  
43.7672102682067

LOC440498 42.442231667357 38.5252456306656 38.5045333213784  
38.745552403895 36.9060997041453 43.0860383229288 36.9355798143571  
39.9576138799997 35.2143190355414 34.3674468322242 40.9157352260901  
43.1805016690297

LOC440503 38.8561375693335 48.4497719907777 51.7138050344355  
41.0726336841311 68.1674425673171 49.4157684139858 47.2927436772465

50.1833483241864 43.0930293831497 66.0224755625662 77.4625808567081  
66.8026147385682  
LOC440508 39.9697332660833 34.9262464079777 41.2365089689635  
48.1662933382789 43.6587492470348 40.3357777530419 43.5627649099623  
45.1714698794331 48.9931786790166 38.8507804383261 46.4205654140754  
40.0557788909923  
LOC440509 46.3390850717989 43.3458769998118 50.9933795450314  
49.1786207920603 44.7829632472754 46.1513019317765 53.3111230705754  
45.3872406432794 45.8325181856483 39.7835513496873 40.6373400186325  
50.8442982601142  
LOC440518 53.8856501960117 42.6939394537076 46.6588655218735  
52.3004056941891 52.8190882379316 49.5424425850549 43.1931731665131  
41.5464765641928 49.7336769474446 47.8207974930031 41.9083581529276  
41.3481355128089  
LOC440525 41.3387790895716 39.2907645923217 42.157627240486  
41.4273122914951 39.9697332660833 36.8059561571675 42.4939802311136  
39.7509165247419 36.3649677956953 36.3612409063792 35.4386677371439  
42.9887069977696  
LOC440550 43.5710871617107 35.5310164682026 37.2838080935695  
37.9875302985336 39.859345745831 38.5252456306656 35.4623691645629  
38.5457716679071 42.1594905198929 39.4710743516517 41.7272875295469  
43.1805016690297  
LOC440551 39.4710743516517 38.2263227947189 41.437237454134  
40.8681871019812 41.2740822675592 37.1317006162938 35.4623691645629  
33.7818132446042 41.2870505273664 38.8507804383261 43.6629145624937  
33.6902293666089  
LOC440558 31.6557652929457 37.2810767789306 38.6727842796202  
40.0698728584484 35.1411239266238 39.132725377815 36.634024014558  
33.9687743313429 34.6720534245631 40.8049408996274 37.9946685306274  
36.2582325396375  
LOC440567 2091.0611913538 2513.15722262176 1549.93897368117  
1379.51119430451 2150.8715161597 1549.93897368117 2206.44541412808  
3043.12489526581 3202.8848520816 2032.18819581205 1881.7281441986  
2331.12401106076  
LOC440570 39.5676051939342 36.6002100641539 28.8989112359112  
38.4208429103799 39.3667161654772 36.8059561571675 34.6720534245631  
32.1260264272477 32.8704945047196 39.9948390976317 35.2339574411711  
40.6614700944853  
LOC440577 40.8681871019812 46.1569135229922 42.2577689927563  
50.2163892855092 41.8806343997257 44.1737502492846 43.6753843488695  
43.1567024035183 48.4869909888679 39.1621898366355 41.9083581529276  
47.3992733452821  
LOC440585 177.985573759136 192.564048264712 262.456109739351  
43.4410741327254 75.5510570035251 44.3648993568405 152.72007888133  
60.5571721986885 125.588228083829 290.031202636467 201.800572658224  
247.356027979377  
LOC440589 6873.84878164654 15358.8899487375 15358.8899487375  
7075.82842238887 13656.2581082905 9852.7965902602 9938.5091387622  
4858.39551231606 11176.402230735 6938.87250165681 8441.71894028273  
9582.11974031559  
LOC440607 45.0985088502363 46.0023068797812 45.310660704531  
43.6726153508978 44.8897737954573 45.2852528185486 50.6774883370457  
44.797320243931 40.8970401536578 45.3530683538086 43.844855336215  
43.8575940017119

LOC440687 35.8208542506595 39.0894172982439 34.6977013306396  
37.5382094267692 32.771863438151 37.3799542961839 34.3633615460307  
37.0390589468421 33.0463640202858 37.3179578037963 35.860430241131  
40.1700117452801  
LOC440704 769.685677484067 551.1195044975 414.539381761279  
637.824136761292 309.022069786139 280.968337220318 743.463635670141  
1259.2978319548 484.651969259966 1111.89793143647 1134.52018899688  
634.514100741768  
LOC440706 46.0920218698606 36.5219488315447 38.6727842796202  
34.9221408381038 33.2552842693684 38.2293008890613 36.9355798143571  
40.5158867964016 43.2761454096265 35.3849221682845 38.2795150354677  
45.8546719310325  
LOC440731 77.0301627655229 54.2445399731644 76.5699943825825  
120.866081604277 87.3957386451235 57.8005007012205 97.5962784863854  
94.4618437533343 92.0711167984454 50.4234835272833 59.1443775199516  
68.8529879402902  
LOC440733 4617.45430247751 5855.6498679729 6134.89208517976  
3884.2191293028 7627.46814033012 8144.52133665388 6606.35767508139  
7127.13565491501 6819.74871209328 7476.94487791412 8630.67463560037  
6186.45345364665  
LOC440737 974.658744477524 1390.12380748446 803.548811322583  
1020.75813028358 1259.2978319548 1817.14004766564 1455.64106630257  
1197.13566108661 875.139073253298 1345.37091574015 1325.2479053325  
1319.32406112346  
LOC440742 39.8662795144616 43.5873188565519 40.7620472083159  
37.7469621225553 37.2567512265363 38.5252456306656 37.3799542961839  
44.7044140979108 42.5406888281114 35.7202909649682 41.6336636285875  
37.5556299264699  
LOC440748 42.7150227340364 40.5852276210998 38.2593044488288  
37.1317006162938 39.8198309498737 39.066284740632 39.4916414839923  
40.8833572570383 43.8106375505041 38.4829727716328 41.4860822396574  
37.5222959113204  
LOC440776 38.0089018744739 39.3999056968598 37.2838080935695  
41.5464765641928 35.6434124419782 36.9060997041453 36.4098694708483  
37.5511560880902 44.2607789091176 41.4397539024976 41.8168470823451  
45.4799270968969  
LOC440786 44.8914371498528 43.0971787292711 40.5734458834617  
40.4359177791566 44.4489662507893 39.6251842352088 51.4349390827895  
38.8495095797881 42.1594905198929 43.844855336215 42.170702295259  
43.0930293831497  
LOC440792 35.7012997405508 37.6383530120621 36.6522278218553  
37.5382094267692 41.467005949568 45.4882438975269 44.0687697278114  
37.6557714476853 43.1805016690297 36.1550293353654 44.1148826235374  
38.3291713594599  
LOC440795 40.2543341073001 39.2907645923217 38.0452862258803  
42.9358255168086 48.2748123114598 37.0180934800573 40.5585676679482  
44.7044140979108 40.0403898620771 42.4594149893798 38.8507804383261  
41.5536168238478  
LOC440804 44.5282181324797 44.9370339275041 43.8495248991589  
55.4180794172794 56.5933259268408 45.1873487463472 40.4359177791566  
46.0633179231318 44.0519245668737 45.3530683538086 40.723990462047  
41.2437378488025  
LOC440820 36.2496364442264 35.9305494063137 38.0452862258803  
36.0481934423077 39.0564222526273 35.2067831864574 31.5556621809114



32.4466419672036 34.7722083264266 39.6719190054379 33.1645364749371  
38.745552403895  
LOC440829 42.9104454767916 40.0527893189096 35.8265993915844  
52.6947911480086 39.3667161654772 39.7394181011603 34.806104801006  
42.2577689927563 39.5806465938526 39.5637454855233 41.3553369544097  
38.9496515344837  
LOC440836 42.442231667357 44.8955824420372 48.8941062980393  
41.1507980856436 38.9919142475596 43.0860383229288 42.3194600586894  
42.9301944191913 42.1594905198929 42.7275315121163 44.1533327883807  
39.1553169409075  
LOC440848 44.2350046179299 45.4882438975269 44.4311655729487  
37.651298468202 42.3685136297603 43.0860383229288 41.9393838138203  
40.5158867964016 42.7150227340364 46.6598879466655 38.1835938174625  
43.6753843488695  
LOC440864 41.1523487516364 38.1312950900467 37.0642268327439  
38.6414316877471 40.3452320167286 37.1317006162938 34.3633615460307  
34.064698871541 35.5220586859301 42.4594149893798 34.266241549578  
39.8497227447888  
LOC440871 38.957687788868 46.0713306971594 43.401782064778  
83.4756142147167 36.4434672195785 42.4580504587581 44.0687697278114  
39.853866204927 41.6616444147804 40.6022003765153 41.5421429082231  
46.5650556481721  
LOC440888 43.844855336215 43.2649781354792 45.4865173433646  
42.2496337895968 44.5668141895992 41.6590564937735 45.7452456977857  
39.3709357615493 45.5779686360641 38.4187686307607 42.0750889188255  
44.2527566343661  
LOC440895 45.4365580679461 46.3394952048258 41.9666541498638  
46.2550834175667 43.1839109702714 43.1390612303312 56.4809146784765  
43.6701228397031 42.7706334754179 43.5677622664316 47.394669014943  
47.8389633185058  
LOC440896 42.6036491382658 43.0227387991135 41.3366779545815  
37.7469621225553 42.7982502551634 42.357910063876 42.9803717121865  
40.931294690669 39.6609238036815 37.6383530120621 41.0050831223107  
40.2669497398702  
LOC440900 49.1868644496737 45.2556760873335 42.5406888281114  
145.267770598988 45.4751076037511 42.2577689927563 46.5650556481721  
48.4670130605028 40.0403898620771 46.5650556481721 46.7386599624801  
43.1805016690297  
LOC440905 43.7105673651665 45.2967117034826 44.3662228328134  
41.1449845929724 42.6520415016543 42.750861693377 44.7915315085948  
43.0390857698452 45.9828778193335 43.0290260867894 41.400731343457  
45.0985088502363  
LOC440910 44.9896851005259 41.3610369241157 42.4580504587581  
40.7481155008596 41.3277288245157 43.3785777889265 40.0603121770344  
41.1575777497576 41.2870505273664 41.7405682794166 42.357910063876  
38.4330755397458  
LOC440917 41.0608773166058 37.8217989841918 46.1653991089885  
36.7892997857376 39.5595233162192 38.1169703906207 41.253645578517  
40.931294690669 44.8003345643334 41.1222709786153 42.170702295259  
35.9604262434141  
LOC440918 43.5710871617107 44.6918600441328 42.5406888281114  
43.1847628331565 44.2607789091176 40.8634043028528 48.4859552186772  
44.5029690493211 47.3791873993182 51.6778366958973 44.6286581923295  
42.2577689927563

LOC440925 54.0990839134272 41.7337506166619 38.5045333213784  
47.3574589211166 42.1650127805175 41.7627910693483 45.7452456977857  
43.9366081640576 44.3440839686558 48.2596564318071 53.4921736109774  
43.7672102682067

LOC440926 2032.18819581205 3263.05269150231 3869.93390477952  
4058.32430616734 2506.05102956991 1698.18614771363 4752.94498024732  
3313.98659031004 2791.75465171135 1255.10866316499 1604.80031304031  
1842.15643221012

LOC440927 709.730555484551 965.530928317269 540.721068846198  
929.862002014478 1237.93130196998 1845.34855798442 906.833938613875  
885.224377292125 1375.14388134842 957.682898193927 1319.32406112346  
1359.9708539999

LOC440928 106.356074933606 47.3536182445315 58.2251348002272  
45.334106390212 54.6820069269589 42.4580504587581 46.9929836306816  
45.5581356216957 58.0722340887264 91.1057573288203 66.6118713143653  
81.2068428211497

LOC440934 48.6621527194963 42.6022652963326 34.9849896310235  
38.9534635879195 47.0954207417646 44.7804080899431 48.1747307200218  
55.9303347977781 41.2870505273664 46.325232414659 43.1931731665131  
46.6397391251762

LOC440944 35.4287975493553 40.7952353240579 35.7105247506212  
38.6414316877471 42.7982502551634 33.5578650644246 39.1539892144371  
42.2577689927563 38.6322728994674 35.7202909649682 40.9157352260901  
40.5703581862752

LOC440956 40.148780650831 38.8336427948187 37.8386378737561  
38.2041059863839 41.7929491793697 43.6670755115848 43.8206425661746  
37.5511560880902 41.6616444147804 41.7405682794166 45.7328341667151  
41.1554481567603

LOC440970 42.9104454767916 42.6939394537076 37.6557714476853  
40.5484717678957 43.6587492470348 41.3553369544097 38.941855825269  
38.4540849632254 40.8970401536578 41.4397539024976 36.3390947880186  
42.8864415494484

LOC440978 41.1523487516364 47.3536182445315 46.5650556481721  
40.0698728584484 44.0451487108213 44.0804700754786 45.223075311113  
41.1575777497576 44.7058233759912 52.5522545249206 49.5923712603197  
44.4475838947656

LOC440981 35.5179217192467 37.7384958256497 37.4642807402741  
38.2041059863839 36.4434672195785 37.2686490268265 36.8369172900902  
34.9580369221164 41.1742244762318 36.1550293353654 34.8383995317036  
47.3992733452821

LOC440992 38.6454098044474 39.9697332660833 46.3411353377615  
47.6687908290818 43.3332476888305 38.5252456306656 37.1643693306382  
38.5457716679071 38.4344387289956 38.528621456378 44.4688999098904  
41.6550823405646

LOC440993 45.6517320730042 49.2050538150106 48.8100349749783  
59.4674205670657 44.7829632472754 45.8325181856483 44.6032218589199  
40.4359177791566 34.6720534245631 66.274247400793 91.1363393944977  
46.2625470410195

LOC440995 40.4639532172338 40.8880530359822 45.4865173433646  
44.550322123994 40.0599807618105 39.132725377815 35.7055410599146  
37.6557714476853 40.3316153483289 36.9102644736882 40.1742127891824  
37.3600014814388

LOC441005 42.3433931248155 42.6939394537076 45.3974838013476  
39.3750969348308 40.9950639693255 37.3799542961839 44.9863726205428

36.5393857306744 42.4540072551568 40.3235655331796 47.1477056711335  
40.1700117452801  
LOC441007 40.3478825593224 41.159706131351 38.4043916290561  
40.646702696033 46.8674366115656 44.0804700754786 44.8643898647322  
35.6825474397235 48.3954967265007 40.5090849993014 39.3667161654772  
51.138877923954  
LOC441016 51.2851682978581 45.9266745571724 43.3085358214154  
45.8844325913247 44.6834648302383 44.3648993568405 48.8319884367456  
46.0633179231318 44.7058233759912 45.3530683538086 44.4688999098904  
51.9447450229707  
LOC441019 69.3418521417182 40.9731067463382 50.6004078448405  
151.438409623226 65.5029051840465 67.8208976798364 53.0277416531043  
56.3560498705517 42.2577689927563 49.0841460667818 52.3187919317561  
50.379587451669  
LOC441031 45.1912496459517 40.5400384479766 44.3344900481112  
43.6726153508978 40.7779767565889 45.0882356578404 43.5627649099623  
41.6466169548846 46.9739160257217 40.7063426028871 43.401782064778  
41.7575097298927  
LOC441032 52.5792653122861 53.565717255469 54.7855575216687  
51.0175677516029 48.9627346956003 65.4643755537228 42.4939802311136  
43.4544762830742 48.3954967265007 54.0374522273907 50.3221380889396  
57.2350830635912  
LOC441034 9582.11974031559 8144.52133665388 5932.92478996609  
6089.64191751349 7022.41612496714 6134.89208517976 8937.3846214861  
7785.77078492993 6027.02412617194 9938.5091387622 9488.06491634484  
9709.60940482862  
LOC441046 45.4799270968969 45.5842286511645 36.769073068743  
44.265834798964 61.1216330559316 51.6053353177789 51.0013344286851  
46.3685439301234 55.4030910454028 54.1683282066029 49.9338905397767  
45.2783024981315  
LOC441050 73.0970339739187 88.1886407127943 82.5344501505114  
73.8480604979804 86.1633564934019 90.99086730704 88.7029126110977  
63.287067794195 91.3362264594431 45.0155543555707 58.4816190076338  
80.2070411865083  
LOC441052 36.9060997041453 42.9358255168086 34.4716904283753  
41.0726336841311 42.4864576619427 32.5219627196161 39.1539892144371  
40.6171774724171 41.6616444147804 39.6719190054379 39.2542963855807  
44.2527566343661  
LOC441054 53.1309801459151 40.8880530359822 45.8844325913247  
40.4359177791566 44.3557408297309 42.0574848021044 42.4939802311136  
43.844855336215 57.7865070833351 43.844855336215 40.0766543123257  
40.1700117452801  
LOC441056 68.8698243753339 43.683792219729 43.4709415392696  
51.0175677516029 42.269054475455 42.4580504587581 61.5000955267432  
48.272324215504 43.7630587657205 41.1222709786153 39.153226699662  
42.0424641526302  
LOC441061 44.6231541342 38.7344853699576 36.6522278218553  
42.6913548400127 41.0885562160946 40.9506062495231 38.6243997507646  
41.8417024632349 40.7847110517594 44.1379638573455 40.547835538778  
47.3172462673426  
LOC441066 40.3478825593224 41.4508241771315 40.8420925848403  
39.6292788039793 33.5412189543102 34.7983399096627 39.3585350448719  
45.8669209716694 38.8271346375425 31.7992509287736 49.8393069675192  
48.8670821164567

LOC441070 35.1307934330047 32.4552405279874 40.7620472083159  
35.314469458379 35.1411239266238 34.4896350146096 38.4005795891396  
33.3307770183871 31.9468644542969 42.785429206422 30.6485078361448  
35.2448979801094  
LOC441081 46.2991903896282 47.8910351649754 42.0164252051496  
45.6733937800088 44.2607789091176 46.6872654833579 47.4439407315335  
45.8134164254471 46.0556875486307 45.8505603625223 44.9174294707972  
45.7258895124195  
LOC441086 42.9104454767916 39.7835513496873 43.4709415392696  
41.8778873678551 33.4316681623175 41.9543948167375 48.9826868640753  
42.8482181313226 43.2761454096265 41.5435611403119 39.2542963855807  
42.9887069977696  
LOC441087 9326.9018948838 5297.71706629059 6027.02412617194  
5354.58328030315 4259.50675863393 3634.98300564068 6309.53691418065  
8441.71894028273 4058.32430616734 8050.256095383 9709.60940482862  
8144.52133665388  
LOC441097 43.0930293831497 40.2493681589104 40.7620472083159  
42.0102671859606 44.8897737954573 42.5660695551615 39.0458123429605  
43.9366081640576 44.5303781239209 39.9948390976317 44.7114813656401  
38.8495095797881  
LOC441098 42.5193208629123 36.4002279956519 37.9482157381008  
43.3078542962968 38.3561682218911 40.244271403831 43.0930293831497  
40.2382908228517 36.8127605061228 38.3092241935352 41.1638563416981  
42.8864415494484  
LOC441108 42.6036491382658 39.0894172982439 47.4740726032707  
38.6414316877471 46.4343327861696 43.7630587657205 39.6535880152834  
40.5158867964016 37.6383530120621 43.4885245598939 41.4508241771315  
43.9541718254769  
LOC441114 46.0023068797812 45.5842286511645 42.7303139017786  
42.5664883002833 45.8051846088552 40.8634043028528 47.7390230243778  
44.9977782988116 42.4540072551568 49.9493230064613 38.2795150354677  
40.0557788909923  
LOC441119 42.442231667357 42.3550738181144 43.1931731665131  
42.2496337895968 40.0599807618105 42.9695585740813 39.3585350448719  
46.4672637826582 41.2870505273664 42.4594149893798 43.3085358214154  
39.2469742642337  
LOC441120 38.3418933808844 43.826317180678 41.2365089689635  
38.3166554965434 45.3675390992851 43.1826328292558 41.0381860307445  
40.0965255448873 34.7722083264266 39.9519547348106 44.2527566343661  
38.9834959368496  
LOC441124 101.28981910937 78.7450149191851 105.422823184744  
91.3475300950304 72.1154333023225 58.8605811695948 69.6301237585571  
76.4637616585578 71.7112108689986 105.009081898873 80.3805507705979  
102.605473054584  
LOC441126 50.315768338317 41.8848959280916 47.2055133646385  
47.6687908290818 51.1368583672022 52.0299937917925 51.9421032049606  
47.7889447429963 49.0986627051784 51.1169368198437 43.3085358214154  
49.2064066614865  
LOC441127 37.9387791625384 44.0409178714232 41.6079958749402  
38.2041059863839 42.9090346219023 38.2293008890613 42.357910063876  
38.6454098044474 37.7384958256497 41.8613406887824 43.7585538437696  
45.1735152121056  
LOC441135 39.8662795144616 38.4330755397458 44.8872784170036  
46.1673159982664 41.6806984441849 39.2985791324641 32.8745892439217

40.5158867964016 38.7298222155532 41.7405682794166 37.9230440150891  
40.5703581862752  
LOC441136 50.2203578628217 47.765848710116 45.3974838013476  
41.7614975630362 50.0580547772867 46.263826584899 36.634024014558  
57.5640428227111 57.4777075615651 56.5379973844443 46.5650556481721  
42.2577689927563  
LOC441150 100.289042948128 102.797268694325 77.5718089378881  
80.8728961146267 103.619396986593 99.3956523785983 136.461760992832  
75.2101993995344 92.3388129097482 90.8188865732032 97.6023731094756  
80.4404044229341  
LOC441151 46.441301934328 51.4413099192899 44.4311655729487  
54.6089451252049 47.4548471240051 46.263826584899 46.8613212048981  
56.4779645313958 47.27543600687 57.8585041080995 51.1483696410762  
46.5650556481721  
LOC441155 51.5229124652769 53.8278927154175 56.9304953559784  
58.4262160879174 56.3263223563484 52.8843091010101 51.5084847996625  
48.303052868477 52.8144580580955 43.4536446900731 48.6447083765118  
52.6021661985394  
LOC441171 40.7609952437622 38.9338521051669 44.4311655729487  
34.6468794865286 41.3755760434934 35.314469458379 41.9393838138203  
45.1714698794331 43.8482802038826 33.5412189543102 44.553780984244  
43.6753843488695  
LOC441177 35.7012997405508 35.2143190355414 38.2280071951674  
40.4359177791566 42.4864576619427 38.5252456306656 37.0564573649223  
42.9301944191913 40.4220196471124 36.8059561571675 37.9230440150891  
36.449101775775  
LOC441178 36.0144420013819 36.4002279956519 41.6977706798234  
42.9358255168086 40.148780650831 41.2567470068038 48.1747307200218  
33.9687743313429 36.5393857306744 49.8393069675192 44.2925355984056  
37.1747156131306  
LOC441179 37.1935273352159 40.3946758935842 47.4439407315335  
43.9744941494111 48.0987228351168 42.9695585740813 38.4456289125816  
43.1567024035183 39.3506426665347 41.5435611403119 44.2527566343661  
40.6614700944853  
LOC441191 47.2862299990938 48.0296332183129 50.8303921211581  
56.0794100106654 51.1368583672022 55.8243694410835 42.8684958525042  
40.5158867964016 49.5539622682049 41.2276963324981 48.6767028205398  
53.2046867327331  
LOC441193 57.2960245538881 46.6996902348633 44.9758339877851  
42.357910063876 44.6834648302383 38.2293008890613 50.3519150282938  
41.5464765641928 46.4164127487052 43.4885245598939 47.1477056711335  
43.9541718254769  
LOC441196 36.5393857306744 38.6414316877471 38.6005272730664  
42.9358255168086 36.08956004634 38.9378717994178 41.8315602975157  
39.5466975353131 36.3649677956953 39.4710743516517 38.956280281655  
38.745552403895  
LOC441205 42.0532901689036 38.2263227947189 39.1799070031819  
37.5382094267692 37.6527901109005 38.4330755397458 38.0598374201407  
36.8400213077707 40.8970401536578 37.1275334308172 41.0808257270221  
37.2810767789306  
LOC441208 40.2543341073001 41.8073910693411 35.0970060242246  
46.8954576545929 41.8806343997257 46.0364000143537 44.0687697278114  
41.3506832276112 44.3440839686558 48.8623729374733 48.9754340235127  
46.8129509799753

LOC441212 44.3355304829989 36.7976562409506 42.5406888281114  
43.8002456102021 42.9090346219023 40.650742261428 47.1345949868029  
42.7431359850339 47.798305839406 40.5090849993014 40.723990462047  
38.9496515344837

LOC441233 37.4554876386402 30.8150126829901 38.1421709520616  
40.3180310664156 38.5512429290626 32.9046688061235 38.7337086062875  
43.9366081640576 41.074824727477 43.2988017098387 41.0808257270221  
37.6557714476853

LOC441237 40.4639532172338 38.6414316877471 35.9305494063137  
40.9607305725196 39.0564222526273 36.1190722948669 38.8417151851134  
39.9576138799997 37.7384958256497 38.745552403895 28.768101860452  
39.3575468494941

LOC441239 44.5282181324797 38.2263227947189 43.0016969050339  
41.3027031037343 42.269054475455 41.2567470068038 42.1607322031054  
42.157627240486 43.3744503319109 43.844855336215 44.7926323492519  
42.57175366709

LOC441241 53.7507429765038 63.5222607845861 62.1893884200745  
52.6947911480086 74.3523005665671 59.8102324370568 68.2708120569221  
51.4360013601805 76.3790849853724 46.6598879466655 50.0303076717704  
56.2804354745795

LOC441246 5438.34345794521 5525.13078364599 2892.02001412369  
3838.19449971537 6555.04068292972 6309.53691418065 7235.0789252269  
5074.07305640514 3966.51586153125 5297.71706629059 5636.93532853955  
5855.6498679729

LOC441249 41.5421429082231 41.8848959280916 35.6139301508335  
39.066284740632 45.3675390992851 46.1513019317765 44.7255207589606  
37.1317006162938 44.7058233759912 42.5664883002833 45.0589947942306  
42.4607795638552

LOC441251 46.0023068797812 37.5469247328848 40.7620472083159  
41.5464765641928 39.3667161654772 40.4359177791566 42.8684958525042  
42.157627240486 38.1169703906207 42.0621425894624 42.170702295259  
43.3744503319109

LOC441257 37.7805366040928 39.7835513496873 39.2388980107385  
47.6687908290818 43.0723817756832 44.7044140979108 41.4742337714895  
42.4580504587581 42.992884918158 39.8873706855774 41.0808257270221  
41.2437378488025

LOC441261 32.9174234020987 37.5469247328848 38.2280071951674  
37.9875302985336 43.3332476888305 38.2293008890613 41.253645578517  
46.0633179231318 38.2215591930186 39.3698811593364 37.9230440150891  
41.3481355128089

LOC441268 82.4263339218052 48.6447083765118 89.6568705925966  
71.3932787152381 73.3533274030352 53.565717255469 41.1507980856436  
78.253478446856 47.3791873993182 111.399831013724 116.547937420457  
80.2727193069362

LOC441282 53.6334631215581 41.159706131351 57.423873475544  
39.6292788039793 39.8198309498737 54.3478800757394 42.629412460409  
41.5464765641928 47.3213303943727 46.7646877499666 47.4630625313159  
40.8098117292322

LOC441294 44.8378856799291 51.7983110178095 46.8873421271259  
41.6564075217517 46.3607182640185 44.3187284857534 42.4493032770053  
44.0736170668178 61.7559532093027 49.1928206164702 48.0921802028926  
51.0013344286851

LOC441296 37.3463875295726 45.5842286511645 43.1931731665131  
37.5382094267692 43.004943518025 39.8455060654531 38.2933870238743

41.2551966132486 40.3316153483289 45.2556760873335 39.3667161654772  
43.7672102682067  
LOC441316 41.4508241771315 37.4540772310118 38.8775560911841  
42.0102671859606 39.9697332660833 43.0860383229288 41.9393838138203  
35.2642250366721 47.1744296124496 40.8970401536578 43.0971787292711  
39.5418280570561  
LOC441320 35.4287975493553 33.6902293666089 40.931294690669  
41.1886975241176 42.4864576619427 41.159706131351 37.0564573649223  
35.0510338774593 39.853866204927 40.7063426028871 43.4709415392696  
38.2350720635382  
LOC441326 41.4508241771315 40.3946758935842 37.7963032976457  
41.7614975630362 40.831207953647 40.8091178323174 42.4939802311136  
41.5464765641928 40.547835538778 38.3092241935352 38.5252456306656  
42.0709558258414  
LOC441340 38.5648843914189 40.2493681589104 41.6079958749402  
45.7397504535169 43.844855336215 36.6271061451613 44.4639405506967  
43.9366081640576 44.0519245668737 29.4322896559759 48.042366934301  
42.6758568421347  
LOC441344 39.1590964332473 39.3999056968598 37.0642268327439  
36.5393857306744 37.956732373465 41.8613406887824 38.4005795891396  
39.1652965788406 41.1742244762318 38.2069499294002 39.8184668132023  
37.9607839934735  
LOC441347 40.148780650831 46.1569135229922 43.4709415392696  
44.9370339275041 44.9936360641969 50.6360662655392 46.7100796279384  
43.5544347011646 44.0519245668737 43.1839109702714 45.0589947942306  
42.7782216342806  
LOC441362 34.0467249875782 41.2598458726002 42.0621425894624  
42.8235313007746 48.0234896130991 40.5281496800812 40.9157352260901  
37.4484310268909 41.5635499110307 39.8873706855774 40.3452320167286  
42.357910063876  
LOC441368 45.6517320730042 41.9894412416874 42.640829914102  
43.6726153508978 46.6397391251762 44.55447271111028 48.3411413510851  
42.5435283762933 44.3440839686558 44.1379638573455 49.1067959632109  
42.6758568421347  
LOC441376 48.9906383294199 42.1607322031054 40.6737160001291  
44.265834798964 41.9842695818285 116.51037006692 41.4742337714895  
41.1575777497576 43.1805016690297 56.1912096308988 63.2684764441521  
69.9767092409915  
LOC441377 250.621261212308 476.421959423835 307.445116836976  
193.60925192949 159.973746908596 402.571146447946 213.309547409053  
853.464809072841 452.969595001684 594.611678976716 170.475212920685  
195.543760781509  
LOC441378 41.1523487516364 40.7952353240579 39.0775870687758  
39.2780515621926 35.3327761997046 46.3715909653832 39.8695929627783  
37.33030683349 44.5303781239209 38.8507804383261 44.0409178714232  
41.1554481567603  
LOC441395 42.9104454767916 42.8542642792862 39.4710743516517  
38.8495095797881 37.5556299264699 43.7630587657205 42.0605906240248  
42.6450179841129 38.2215591930186 38.745552403895 33.5370783156523  
34.9138625012006  
LOC441408 111.954989477689 118.32905874786 83.4679576894911  
89.4504034432321 156.615248744544 97.4967204298499 280.202284365004  
169.18132209076 77.3367966395554 209.214729757636 106.443777149496  
86.3888090084564

LOC441424 40.8681871019812 34.6306468196142 31.3222361955842  
33.9645433044281 35.3327761997046 33.7818132446042 36.4098694708483  
41.9315419791594 33.6288663955758 30.3383368296776 36.8282383070068  
31.5556621809114

LOC441426 41.1523487516364 42.4493032770053 39.1480645318984  
44.0991023527481 47.27543600687 42.9695585740813 39.6123051184545  
42.4926864381766 38.4970433581463 40.8049408996274 39.6403089864678  
41.3803269429468

LOC441436 39.5676051939342 40.8880530359822 42.9104454767916  
36.264823544143 40.9950639693255 40.4359177791566 36.7356360093603  
45.1714698794331 34.6720534245631 43.2988017098387 40.9157352260901  
39.3575468494941

LOC441440 51.7607563002005 39.5050383901884 35.5220586859301  
47.3574589211166 42.269054475455 42.5660695551615 42.7431359850339  
43.4544762830742 49.0986627051784 38.957687788868 38.6662194645633  
40.7704587752083

LOC441454 42.1537476443423 37.7384958256497 37.2838080935695  
38.0958223740111 35.7973685350741 35.7034203372528 35.9058393060637  
44.293922970134 38.9006788676407 47.0055981216687 38.3684202018524  
38.9496515344837

LOC441459 40.8681871019812 39.6123051184545 46.8267540220952  
38.4208429103799 39.2608760193011 42.2577689927563 41.5817737564592  
41.0381860307445 36.2733735494625 36.2435874904689 38.6662194645633  
36.6603338274678

LOC441461 51.8781065691038 63.3667304749164 52.2132783757422  
40.646702696033 42.0709558258414 42.0574848021044 56.2181240696479  
57.9713749600418 59.8158518516035 66.5422130374814 54.8532558909227  
57.934622029119

LOC441476 40.6559419616644 36.6968906669565 39.9101908547397  
41.5464765641928 36.3390947880186 40.5281496800812 41.253645578517  
35.7973685350741 36.197424053556 38.6454098044474 44.8872784170036  
42.9887069977696

LOC441488 42.6036491382658 42.1607322031054 39.5450079747895  
40.8681871019812 41.8806343997257 37.5887129572848 43.4544762830742  
40.4359177791566 46.581796165231 41.9666541498638 39.5399188536544  
39.4490233720848

LOC441511 58.3702889417801 65.485076402841 61.6878176260761  
42.1273928203021 72.6675345946258 74.6375749739389 51.4349390827895  
48.272324215504 68.4720753153522 37.5343260962758 47.9942520395434  
56.1136936405786

LOC441528 44.8914371498528 63.1780854659428 51.9214790114499  
39.7411455670172 57.5040500497076 44.5544727111028 65.644767142472  
74.2517888452553 58.0722340887264 50.5252048155459 54.1963147679251  
55.5712957590038

LOC441546 39.7576136507593 37.6383530120621 44.1452943804044  
36.890925044696 37.6527901109005 40.4359177791566 41.5817737564592  
42.157627240486 39.1790517315259 41.9666541498638 41.8168470823451  
44.1452943804044

LOC441548 41.9407041937973 40.7952353240579 38.1421709520616  
40.3180310664156 43.2484996523549 37.9951997351435 38.5066108855005  
41.9315419791594 46.3203995372658 47.0055981216687 44.1148826235374  
36.9976231206067

LOC441551 47.5647821785529 42.5269793679335 45.7968648044613  
45.5869891570251 41.7929491793697 44.5544727111028 42.4939802311136



38.956280281655 38.7298222155532 48.9826868640753 40.4504608195666  
44.1452943804044  
LOC441554 41.7397731376692 44.3529919625344 45.4865173433646  
42.1273928203021 48.1473938886239 44.1737502492846 43.4544762830742  
47.0940613507321 47.7086093893038 43.6033221838149 43.3085358214154  
45.4799270968969  
LOC441582 39.9697332660833 40.0527893189096 42.4580504587581  
42.9358255168086 38.1644569189523 42.8598805316863 39.5496902678788  
40.7311497914871 39.5806465938526 47.2299678280724 41.6336636285875  
39.1553169409075  
LOC441584 43.1805016690297 35.3307157989724 39.991353369336  
38.8495095797881 39.0564222526273 46.1513019317765 41.706879587091  
38.1835938174625 40.6957787921451 38.528621456378 41.5421429082231  
42.4607795638552  
LOC441601 40.8091178323174 40.0145811166794 43.5710871617107  
39.3750969348308 42.4864576619427 40.7063426028871 39.2533668167483  
39.3113207075992 39.7162631015511 39.6251842352088 44.1533327883807  
43.1235886043549  
LOC441617 36.6480005877129 40.9731067463382 39.6451483836089  
43.4410741327254 40.9950639693255 36.4986986135769 39.6535880152834  
40.6171774724171 36.0741672064298 42.6793753550854 41.9908237694988  
36.8690774823319  
LOC441632 43.0930293831497 40.7952353240579 45.7968648044613  
46.614092935749 47.3172462673426 45.0882356578404 58.6431245059655  
44.1311654985682 41.7627910693483 44.7958122466628 46.2560238004757  
41.863927676552  
LOC441655 53.2046867327331 48.5905518770847 54.2670850492947  
55.6481366056639 59.6922302604696 54.7083331985678 52.561573697155  
48.272324215504 43.9450023643394 47.7180816682562 49.2206713037152  
47.0130468198828  
LOC441662 44.7915315085948 44.3977035913759 46.3150221024046  
41.2551966132486 42.269054475455 45.0283997415478 44.2166118829877  
44.6107027295193 45.1899271235974 44.1379638573455 43.0710577955487  
45.5800840647989  
LOC441682 40.7609952437622 42.3550738181144 46.3411353377615  
48.1662933382789 39.2608760193011 47.3791873993182 45.7452456977857  
43.9366081640576 44.0519245668737 48.7414853386615 42.5426057453993  
43.6753843488695  
LOC441698 38.1169703906207 42.7775752471711 40.8420925848403  
35.49696651597 38.2496050953547 43.9724628401189 32.4466419672036  
39.4710743516517 42.0621425894624 36.1550293353654 41.0808257270221  
39.6352613956998  
LOC441709 40.8681871019812 36.2103905554984 39.5450079747895  
40.646702696033 31.3142073726046 35.8227939208521 38.7337086062875  
39.4710743516517 36.6312676076142 34.2638875325204 40.8225507267584  
37.4554876386402  
LOC441722 38.957687788868 39.3999056968598 39.3709357615493  
41.1886975241176 39.2608760193011 35.6125439901743 37.830876898596  
40.047314525032 39.5806465938526 37.920964499903 35.3362091871364  
39.2469742642337  
LOC441737 45.1912496459517 44.9370339275041 43.1931731665131  
49.7350276169552 39.1650142708257 43.7630587657205 40.6750540874299  
39.9576138799997 41.1742244762318 38.8507804383261 46.824299585607  
43.1805016690297

LOC441743 47.0940613507321 51.7495306734657 46.7508829977587  
38.2041059863839 46.0977687311222 48.4758590019384 47.1345949868029  
46.1673159982664 60.6266092582071 42.8936990772838 47.0110068985119  
63.8558858499025

LOC441752 44.2350046179299 38.9338521051669 38.3166554965434  
40.4359177791566 39.3667161654772 38.1169703906207 43.1931731665131  
48.3590401011623 40.8970401536578 38.6454098044474 41.6336636285875  
34.806104801006

LOC441759 38.385865183581 36.89524015739 39.1799070031819  
37.4223289687135 39.6535880152834 37.9951997351435 40.9157352260901  
41.5464765641928 31.7063377004409 39.5637454855233 40.9157352260901  
38.1421709520616

LOC441762 36.5393857306744 44.7829632472754 45.4865173433646  
37.1894304543751 41.467005949568 39.2985791324641 39.6535880152834  
38.6454098044474 35.7973685350741 42.3606390470387 37.6484782516569  
41.2437378488025

LOC441763 515.966709523978 339.210875653066 157.133627517432  
494.162646055732 293.086409068972 240.139560726101 489.983164420779  
189.164097331837 229.547114945412 120.60052672409 168.897476166126  
232.019748665806

LOC441771 38.957687788868 41.4508241771315 42.4580504587581  
44.0451487108213 39.3667161654772 40.3357777530419 42.4939802311136  
43.0390857698452 44.8997235283254 41.4397539024976 42.7275315121163  
41.7575097298927

LOC441773 42.5193208629123 43.7644428186265 39.3709357615493  
40.646702696033 43.1252272136667 35.4142595025086 43.4544762830742  
52.0503062610092 39.3750969348308 44.571915452417 42.4580504587581  
39.2469742642337

LOC441775 2232.61002288121 4277.93019582362 3478.67753301901  
2018.28984520892 4717.02689540013 4058.32430616734 2903.00880209344  
1792.42490815074 4216.69417265779 3884.2191293028 3905.8371644287  
3546.97585966225

LOC441782 41.4508241771315 45.8669209716694 53.3127618245672  
45.1944222548351 52.2089306840125 41.9543948167375 42.8684958525042  
41.1575777497576 45.5779686360641 50.5252048155459 44.7114813656401  
46.2625470410195

LOC441792 39.0620487644635 37.4540772310118 36.8730514568925  
35.6027791404152 32.4181238410234 45.7300501624017 37.9430145836712  
36.3405039629059 38.7298222155532 43.4885245598939 34.8383995317036  
44.8372404608604

LOC441795 43.6706764143908 38.5252456306656 36.6522278218553  
33.1817617228171 36.9702228618069 40.1428591998404 41.0381860307445  
37.86982638952 37.0126425326534 36.3612409063792 46.6442692119997  
40.8681871019812

LOC441799 40.8681871019812 43.4396866157171 40.5734458834617  
44.265834798964 47.5647821785529 40.4359177791566 53.8687221233237  
44.2159020605784 39.4762546236449 41.3321861371202 40.4504608195666  
39.5418280570561

LOC441811 38.7537364570873 35.3307157989724 38.7745734037492  
36.9912468186322 34.9062568194127 37.1317006162938 34.0777108441756  
37.1317006162938 36.3649677956953 42.785429206422 38.4689132737495  
34.806104801006

LOC441812 43.5710871617107 39.0894172982439 47.0055981216687  
34.7266486944713 37.2567512265363 41.3553369544097 36.08956004634

35.0510338774593 37.5469247328848 38.528621456378 35.860430241131  
30.422292833952  
LOC441843 45.0985088502363 42.0709558258414 48.9944486068347  
43.3078542962968 35.0181575202066 42.750861693377 39.4600924554505  
44.6107027295193 42.6366765186182 37.1275334308172 42.170702295259  
44.2527566343661  
LOC441847 39.5676051939342 39.9697332660833 36.6522278218553  
46.7577982595088 43.1252272136667 42.357910063876 37.0564573649223  
42.8482181313226 41.863927676552 39.6719190054379 44.0409178714232  
42.0424641526302  
LOC441864 45.5758521267508 41.4508241771315 44.6032218589199  
41.8778873678551 40.9950639693255 40.040778349137 41.706879587091  
37.5511560880902 41.3803269429468 35.7202909649682 41.5421429082231  
46.4499258373233  
LOC441868 42.8036731479932 43.8495248991589 46.3411353377615  
50.0526763693329 46.5557478175976 47.0940613507321 48.3411413510851  
41.9315419791594 51.8083208406279 43.9450023643394 45.7328341667151  
41.4508241771315  
LOC441869 41.2424637338424 74.1686961093736 59.6565330440648  
47.3574589211166 61.3077641493507 40.650742261428 80.354283778818  
35.6825474397235 56.1733549054832 44.3648993568405 46.0095710163378  
67.0331844416938  
LOC441870 41.1523487516364 40.8880530359822 38.8775560911841  
42.8235313007746 42.269054475455 39.3841861812262 37.1643693306382  
45.1714698794331 45.0017158586743 42.8936990772838 40.2649309204478  
41.7575097298927  
LOC441873 35.3227485563945 40.148780650831 38.3166554965434  
37.1894304543751 32.6463318577756 39.4953494583071 39.5496902678788  
40.047314525032 38.0213051227859 38.8507804383261 35.6970528713709  
44.8372404608604  
LOC441874 41.2424637338424 42.2577689927563 48.7039705048129  
40.0698728584484 54.3116862772198 44.2607789091176 45.6042625176633  
43.9366081640576 43.4656637536244 41.2276963324981 43.7585538437696  
41.0657892043496  
LOC441876 5479.94045861143 8259.38594893529 9181.13240708506  
7681.71833395626 13230.9863405074 11795.0477101407 10996.2779403491  
9852.7965902602 12456.731302703 7911.19531717602 8827.37298329149  
10617.4323014458  
LOC441907 47.8249696958403 41.8073910693411 46.3411353377615  
39.1706564265495 47.3172462673426 38.5252456306656 43.4544762830742  
41.2551966132486 44.619512785899 46.8954576545929 40.3452320167286  
45.7562276914441  
LOC441920 49.4151347850687 42.1607322031054 43.1931731665131  
45.5869891570251 44.2607789091176 39.2248354955045 61.0979269700412  
43.1567024035183 40.4997186069494 51.5855515705917 43.0971787292711  
40.4639532172338  
LOC441925 39.1590964332473 42.8542642792862 47.646800205189  
42.8235313007746 42.6022652963326 43.8582747295766 42.8684958525042  
39.6474008369935 45.1899271235974 45.0155543555707 43.5710871617107  
41.5536168238478  
LOC441931 44.1294459089314 44.4411734611229 44.5134109184888  
47.0874209746031 40.9950639693255 39.0266821712099 41.9393838138203  
42.2577689927563 44.4395580493118 46.2286164776607 46.7386599624801  
45.5800840647989

LOC441956 38.1169703906207 44.0578434007778 41.4534762662066  
44.265834798964 44.2607789091176 43.006072841282 42.0016830644258  
44.7470332010482 43.8482802038826 44.3124153157801 44.9977782988116  
44.7401523707775  
LOC441958 42.0532901689036 40.9731067463382 45.063792968927  
49.3654837541353 44.8897737954573 41.7627910693483 41.8315602975157  
44.1311654985682 37.4540772310118 46.325232414659 41.7272875295469  
41.1554481567603  
LOC441964 40.2543341073001 38.5252456306656 36.3604951341921  
41.4273122914951 38.5512429290626 42.0574848021044 46.0228732507872  
43.4544762830742 45.0017158586743 43.9450023643394 38.1835938174625  
41.0657892043496  
LOC441996 37.8386378737561 42.6022652963326 37.1643693306382  
42.0102671859606 45.5809132232681 39.132725377815 43.8206425661746  
38.3684202018524 41.4636047919453 40.1179210534118 44.8872784170036  
42.6758568421347  
LOC442015 44.3355304829989 43.7644428186265 35.5220586859301  
43.5627649099623 41.0885562160946 44.7804080899431 46.4388841354122  
51.3472428383325 41.4636047919453 39.9948390976317 43.9450023643394  
48.27609330316  
LOC442020 43.844855336215 41.8848959280916 46.4569566520107  
41.0726336841311 41.9842695818285 45.4882438975269 44.9863726205428  
39.7509165247419 45.5779686360641 46.5650556481721 44.4688999098904  
37.2810767789306  
LOC442028 42.9104454767916 35.0222940937513 35.7105247506212  
34.1051821768421 34.7018263647985 41.6590564937735 30.9403229851671  
35.3608605269276 34.2973261206803 41.4397539024976 34.3633615460307  
34.6720534245631  
LOC442049 42.8036731479932 41.159706131351 45.7968648044613  
45.0798408927912 45.2556760873335 43.7630587657205 46.5650556481721  
43.4544762830742 45.5779686360641 45.5776159432079 46.8954576545929  
42.6758568421347  
LOC442057 45.1912496459517 45.2556760873335 43.0971787292711  
41.1886975241176 36.08956004634 42.0574848021044 44.9863726205428  
48.87875862356 46.7760357462635 41.5435611403119 48.2050207071554  
47.7962548556026  
LOC442060 34.8099089553046 34.8137085420423 42.2577689927563  
36.1562979552173 36.9060997041453 34.4896350146096 37.6036146841933  
37.2237132058632 34.226171989766 38.528621456378 38.6662194645633  
34.806104801006  
LOC442064 47.6397712007919 42.2577689927563 42.5406888281114  
49.9014504704021 40.9950639693255 44.6524308640784 42.2577689927563  
41.2551966132486 43.1805016690297 39.6719190054379 41.5421429082231  
40.6614700944853  
LOC442096 44.2350046179299 35.5310164682026 47.2962360458401  
42.9358255168086 38.5512429290626 41.3553369544097 42.1607322031054  
41.5464765641928 39.1790517315259 48.3693338695392 40.547835538778  
38.3291713594599  
LOC442117 44.436995101921 39.6123051184545 34.1806289878747  
41.1886975241176 36.9702228618069 40.650742261428 43.9450023643394  
36.9355798143571 45.0017158586743 40.4136535208406 36.0481934423077  
39.1553169409075  
LOC442124 37.6397652536077 44.3529919625344 39.4710743516517  
40.7481155008596 46.4343327861696 37.0180934800573 37.6036146841933

40.4359177791566 40.137818555383 39.8873706855774 42.5426057453993  
38.3291713594599  
LOC442132 36.7356360093603 36.89524015739 34.9849896310235  
36.3604951341921 35.2163900400329 40.040778349137 39.8695929627783  
38.2782436497441 42.5406888281114 38.4187686307607 37.1059647239814  
41.863927676552  
LOC442147 38.7537364570873 35.2143190355414 34.5718473203083  
42.2496337895968 44.9936360641969 45.3882138838137 40.2154497375715  
37.6557714476853 44.8003345643334 39.2623423164488 36.43924066428  
40.2669497398702  
LOC442180 44.1294459089314 43.3458769998118 44.9758339877851  
55.4180794172794 48.6224651100733 48.8744644207821 41.0381860307445  
44.9977782988116 39.853866204927 39.9948390976317 43.3085358214154  
48.1627097465883  
LOC442204 41.5668884168669 40.8880530359822 42.2837084302963  
44.0991023527481 39.9283177178222 43.7078399718247 44.7255207589606  
42.9887069977696 44.2142581488029 44.1861590259178 37.4345152884462  
42.7275315121163  
LOC442206 38.2083710281545 38.1312950900467 34.806104801006  
35.314469458379 42.1650127805175 35.5158505219112 35.6056062164318  
37.9837233601316 36.6312676076142 36.3612409063792 35.1470994647364  
31.6419446793642  
LOC442208 44.1294459089314 42.3550738181144 41.0356368374708  
43.6726153508978 44.147557390293 42.357910063876 48.8319884367456  
48.0582855095143 39.1790517315259 41.5435611403119 37.4642807402741  
36.2582325396375  
LOC442229 41.2424637338424 41.3610369241157 46.0727230219512  
43.1847628331565 42.0709558258414 41.9543948167375 40.5585676679482  
43.1567024035183 42.5406888281114 41.8613406887824 37.4642807402741  
42.7782216342806  
LOC442245 40.5654775358427 44.3529919625344 40.0998167098057  
40.8681871019812 43.2484996523549 41.9543948167375 43.8206425661746  
45.7476095696859 46.4861258030402 42.2614524730856 44.8872784170036  
45.1735152121056  
LOC442251 41.6354649482853 40.2493681589104 39.991353369336  
36.4564050256915 41.2740822675592 40.8634043028528 38.0598374201407  
41.4508241771315 39.0775870687758 39.9948390976317 43.7585538437696  
36.1647506311964  
LOC442261 43.844855336215 39.5050383901884 38.6005272730664  
38.5252456306656 38.0598374201407 41.6590564937735 46.1634822993009  
39.9576138799997 44.2607789091176 39.2623423164488 37.7384958256497  
36.5474283500601  
LOC442283 44.1294459089314 48.4497719907777 45.3974838013476  
57.6511495792664 50.7615314686244 56.0477607422828 56.6537562775715  
50.3082459161777 48.2123120250343 49.8393069675192 58.2941346100716  
50.7487159427973  
LOC442299 43.2724556187214 43.3458769998118 42.640829914102  
43.5627649099623 36.9060997041453 42.0574848021044 48.8319884367456  
42.0494116081998 39.4762546236449 40.8970401536578 48.4717951775049  
39.7411455670172  
LOC442316 37.9387791625384 41.2598458726002 44.1452943804044  
40.646702696033 38.8456942580061 36.8059561571675 38.6243997507646  
43.4544762830742 41.3803269429468 38.4187686307607 41.5421429082231  
42.57175366709

LOC442329 43.2724556187214 49.7363778831003 52.6275131390249  
47.481302504066 50.7615314686244 42.750861693377 54.9765783642973  
47.8947595316832 81.0169370911764 48.3693338695392 44.1148826235374  
46.2625470410195  
LOC442366 47.6397712007919 42.4493032770053 47.0940613507321  
52.8502823653368 55.4030910454028 43.0860383229288 40.0052661202207  
41.2551966132486 47.7086093893038 49.3000844711116 43.5710871617107  
49.5539622682049  
LOC442382 40.4639532172338 39.0102066700839 38.9790184198145  
39.1706564265495 39.4693871570028 34.7983399096627 45.7452456977857  
43.844855336215 44.0519245668737 41.0057887014368 39.6403089864678  
40.2669497398702  
LOC442388 40.7609952437622 40.148780650831 42.7303139017786  
44.0451487108213 41.5668884168669 45.3882138838137 42.1607322031054  
44.0390019242862 43.6670755115848 44.7958122466628 46.7386599624801  
41.7575097298927  
LOC442403 43.1805016690297 40.7952353240579 52.1242102345408  
48.856176220627 46.7508829977587 41.159706131351 42.2577689927563  
44.797320243931 41.4636047919453 43.6033221838149 43.0016969050339  
46.7182294568603  
LOC442406 44.7915315085948 44.9370339275041 39.7411455670172  
46.1673159982664 41.5668884168669 40.4359177791566 41.4742337714895  
44.9977782988116 40.3316153483289 44.4652605017595 41.2598458726002  
40.0557788909923  
LOC442421 39.8662795144616 42.3550738181144 39.8299340037009  
51.5913529948887 44.0451487108213 47.2009420656854 48.9826868640753  
47.8947595316832 47.6195009345747 47.4767851750188 42.170702295259  
49.3984571719129  
LOC442423 41.0608773166058 31.8637059340657 34.0382693188794  
39.9697332660833 36.08956004634 34.5886782974123 31.4474799869345  
38.3684202018524 35.1155486926999 35.2880714952489 39.6403089864678  
36.3454320848591  
LOC442446 43.7585538437696 44.2630383225933 41.528370959196  
37.651298468202 43.3332476888305 44.7804080899431 41.8315602975157  
38.6454098044474 37.1820543575123 34.4875013487777 45.9104478407175  
38.4330755397458  
LOC442448 41.5421429082231 45.1694246393676 52.5353664902258  
42.2496337895968 42.3685136297603 41.554942319225 48.4859552186772  
37.86982638952 43.7630587657205 44.3648993568405 44.7114813656401  
40.8681871019812  
LOC442454 407.161973433666 296.463473585355 250.359859946258  
284.241284057415 525.35784336478 481.905052451245 169.633672522325  
303.458085392002 280.446302631438 370.088974562672 361.861166927682  
735.083155673644  
LOC442465 35.7012997405508 35.4484652445078 36.9795961564828  
39.853175885492 35.5220586859301 31.5556621809114 31.8431345631453  
34.1806289878747 40.4220196471124 30.4639019828888 34.7308008643142  
35.2448979801094  
LOC442474 44.0328992213727 42.7775752471711 46.8267540220952  
43.3078542962968 41.1868052124344 44.8872784170036 48.6395795163502  
45.2806199505029 40.8970401536578 42.1622837416589 43.3085358214154  
41.3481355128089  
LOC442480 39.1590964332473 39.0102066700839 43.4709415392696  
46.3203995372658 39.4693871570028 43.4681646416585 46.0228732507872

38.956280281655 41.1742244762318 41.8613406887824 35.6970528713709  
42.8864415494484  
LOC442501 43.9309845324767 40.148780650831 43.1660110696573  
38.9934686082455 43.683792219729 46.4648868771662 42.357910063876  
46.1673159982664 46.3563690926644 42.3413611855132 43.1724740315182  
38.745552403895  
LOC442512 47.7267190613906 43.1805016690297 42.640829914102  
42.6913548400127 43.1252272136667 41.8613406887824 47.2927436772465  
39.853866204927 42.7150227340364 40.8970401536578 38.8507804383261  
41.0657892043496  
LOC442517 41.5421429082231 42.9358255168086 40.7620472083159  
47.9915414951747 38.2496050953547 40.1428591998404 44.9863726205428  
40.1474543172332 42.1594905198929 47.1001757441025 44.6286581923295  
43.1805016690297  
LOC442519 48.6621527194963 42.8542642792862 46.5650556481721  
41.1886975241176 45.5809132232681 42.157627240486 45.3597029614942  
45.0972184964705 45.7452456977857 45.4614234442527 39.5399188536544  
35.3525469364579  
LOC442535 42.3433931248155 48.275452803061 48.9944486068347  
76.450993090133 45.1137938810047 43.4681646416585 44.4639405506967  
46.2779564481158 40.5912213523345 47.3791873993182 38.079222289614  
44.6484005362281  
LOC442560 46.7293238583888 49.3581578587582 44.2405728317107  
49.7350276169552 40.0599807618105 39.9397419279057 46.3057385979341  
50.3972033014227 45.6582729799009 46.7646877499666 44.9713479185144  
44.9070250604284  
LOC442570 39.7576136507593 39.5050383901884 40.931294690669  
43.1847628331565 45.4751076037511 42.157627240486 48.3411413510851  
37.5511560880902 35.5220586859301 39.8873706855774 37.2018803984555  
40.0557788909923  
LOC442572 38.0089018744739 40.2493681589104 46.4569566520107  
41.0726336841311 42.269054475455 45.3882138838137 44.6032218589199  
47.9942520395434 43.9450023643394 42.0621425894624 46.0905079010237  
41.9430737035925  
LOC442582 38.304249186058 35.0222940937513 39.5450079747895  
40.3180310664156 31.6519589095843 34.6977013306396 42.2577689927563  
37.4484310268909 35.2143190355414 31.2688290305385 41.7272875295469  
40.5703581862752  
LOC442590 46.0023068797812 36.4002279956519 43.401782064778  
44.7980740332174 38.9496515344837 40.4359177791566 46.5650556481721  
31.3302670771182 43.5669306063196 45.0155543555707 42.5426057453993  
41.2437378488025  
LOC442597 42.8036731479932 42.9358255168086 39.2707964550441  
40.9607305725196 44.6834648302383 47.4699236780425 43.6753843488695  
41.3506832276112 34.2973261206803 43.1839109702714 48.8088340735921  
43.0930293831497  
LOC442606 41.0608773166058 43.3458769998118 46.7508829977587  
41.5464765641928 42.7107928951766 47.4699236780425 48.8319884367456  
42.357910063876 36.8127605061228 41.0057887014368 48.3847843498476  
47.3992733452821  
LOC442710 39.3709357615493 43.3458769998118 39.8299340037009  
45.334106390212 39.7568367479301 39.7394181011603 40.2154497375715  
43.3262148375525 40.6957787921451 37.3179578037963 38.4689132737495  
39.4490233720848

LOC442711 46.1673159982664 47.6229101519945 40.5734458834617  
58.0218262176065 49.5666074434383 42.4580504587581 44.6032218589199  
46.8954576545929 51.2066664465185 49.6203214143464 46.3370338074996  
48.8670821164567

LOC442726 36.1232327599945 33.3069622728735 37.1643693306382  
41.4273122914951 31.4686555405126 37.3799542961839 38.6243997507646  
38.1835938174625 35.3227485563945 32.6203270051744 37.4642807402741  
37.8490162439785

LOC474170 50.6473771879221 43.0971787292711 57.0427273538849  
48.309866878365 47.2074332636566 41.8613406887824 42.9803717121865  
47.6952179922944 50.4974478884077 47.3791873993182 43.0016969050339  
51.3244198342335

LOC492303 38.5007204246293 42.6022652963326 36.178547300352  
39.1706564265495 38.5512429290626 42.8598805316863 44.6032218589199  
41.1575777497576 38.4344387289956 37.0320432433314 42.6366765186182  
38.2350720635382

LOC492311 125.891602778425 71.9162507601624 101.2615980834  
94.7283425282671 76.209239524646 208.30969642805 63.5738862549306  
70.2541961995753 93.4980947651211 268.38649000825 174.021676013865  
222.16475904496

LOC493754 52.6960621424156 52.502055890816 64.6111899743678  
54.6089451252049 60.2886873195135 64.2174369755376 64.4736987797413  
52.3068458655445 68.1674425673171 52.3304586399695 47.7535797917441  
68.9258122619781

LOC493869 161.109600577001 52.5868047927666 66.8632294055679  
142.714450804595 88.3954618645976 99.8323169037315 56.9320717885002  
52.1788489555942 71.0211264570699 77.9085946827079 58.9676332048764  
97.4709987978999

LOC497190 48.3814421939888 50.2163892855092 50.0748292497578  
45.0798408927912 50.6470461863549 42.357910063876 50.8388984085636  
46.7980335276155 55.1253465069845 41.0057887014368 44.0409178714232  
39.4490233720848

LOC497256 47.9175508887533 41.3610369241157 44.9758339877851  
43.8002456102021 43.5544347011646 41.2567470068038 47.4439407315335  
36.1375121409002 38.0213051227859 38.6454098044474 42.911855821602  
38.4330755397458

LOC504188 46.0920218698606 45.5842286511645 38.6727842796202  
37.0732977341185 48.2748123114598 41.6590564937735 38.6243997507646  
38.956280281655 42.2577689927563 42.9866214102525 46.6442692119997  
42.1537476443423

LOC51057 41.5421429082231 44.2405728317107 41.2365089689635  
42.6222445667107 40.8873907150245 40.0766543123257 36.634024014558  
42.2577689927563 42.38204124321 39.4710743516517 43.0971787292711  
40.1700117452801

LOC51145 44.7915315085948 43.0227387991135 39.3709357615493  
40.9607305725196 45.1137938810047 39.8455060654531 41.3594868055879  
42.4580504587581 42.4540072551568 47.1001757441025 41.0050831223107  
37.8490162439785

LOC51149 42.3433931248155 40.716553247236 35.7105247506212  
30.7315474127249 36.2048942610546 47.4699236780425 42.7431359850339  
38.3684202018524 41.3803269429468 36.1550293353654 36.9060997041453  
48.7814131120945

LOC51152 49.085741080241 38.2263227947189 45.1569741609597  
46.4555908533915 46.9906120932727 46.0364000143537 42.0605906240248



43.3262148375525 45.5779686360641 44.6918600441328 41.6336636285875  
45.9693232070002  
LOC51233 40.6559419616644 36.1232327599945 37.2838080935695  
46.1673159982664 33.7494761745342 35.0970060242246 41.0381860307445  
46.4672637826582 39.5806465938526 44.3648993568405 38.6662194645633  
46.4499258373233  
LOC54103 50.315768338317 58.9910892923962 42.7303139017786  
53.0284011078097 45.3675390992851 44.0804700754786 40.9157352260901  
55.421880601441 50.8485682149772 52.0999467564713 52.902043370862  
52.4992300612807  
LOC541469 50.1533437545239 43.0227387991135 36.0306975524309  
43.3078542962968 40.8873907150245 36.6271061451613 35.8227939208521  
39.3709357615493 49.4786466722535 39.5637454855233 43.0016969050339  
37.2810767789306  
LOC541471 42.6036491382658 46.0023068797812 44.6032218589199  
51.949834638817 42.1650127805175 46.7800033479223 47.2927436772465  
40.7311497914871 40.8970401536578 42.4594149893798 38.3684202018524  
39.9519547348106  
LOC541473 34.3473914754963 40.6380495994768 41.6079958749402  
39.6292788039793 53.5594683028749 43.5752393599169 41.8315602975157  
39.7509165247419 39.9444191873552 47.1001757441025 35.860430241131  
42.7782216342806  
LOC550112 59.220967994972 55.0897019602305 73.6323065529916  
65.7321440516177 55.6069214673486 58.3387916574158 60.2399886747451  
48.272324215504 65.1424206085551 63.3006977162657 61.940656536312  
77.6056319020116  
LOC550631 43.2724556187214 44.8529259387308 40.7620472083159  
44.9370339275041 51.2525124735102 43.9724628401189 51.0013344286851  
42.0494116081998 44.619512785899 42.9866214102525 45.9104478407175  
43.3744503319109  
LOC552891 47.0940613507321 46.1131345131683 45.1569741609597  
57.2856683017619 38.7004513165111 49.7149784386993 44.9094465483072  
44.4031868028216 48.27609330316 42.5664883002833 42.911855821602  
46.1592873342534  
LOC553158 35.4287975493553 32.9795880920156 34.1806289878747  
32.4383992781552 37.5556299264699 30.8824580894159 41.9393838138203  
31.8228237796461 35.860430241131 30.8150126829901 36.0481934423077  
34.9138625012006  
LOC554175 38.5007204246293 40.3946758935842 43.4709415392696  
43.8002456102021 41.4397539024976 41.1090481599939 47.209353240759  
39.8965727231863 41.863927676552 43.4544762830742 42.6776449468246  
38.6005272730664  
LOC554203 48.9906383294199 69.5544840164738 63.2475738480323  
60.1837189855762 49.452985143568 63.9650465690339 47.4439407315335  
40.3357777530419 71.0820747228972 67.9259304928255 60.8662233098324  
68.2309359831273  
LOC554206 47.6397712007919 57.8405769800773 53.2046867327331  
43.074472921841 61.3077641493507 42.8598805316863 70.8835636550472  
77.0262811825953 57.4777075615651 62.5036823572932 60.9446532180211  
53.4735821194294  
LOC554208 51.413025495745 49.3581578587582 53.8724557170772  
49.7350276169552 46.1804647841331 46.3715909653832 57.6643188499117  
54.1731035633439 48.9931786790166 55.7930787690756 49.7363778831003  
49.5539622682049

LOC554223 45.1912496459517 46.7591817286632 45.1569741609597  
47.2797818740024 46.9906120932727 42.8598805316863 43.1563544904505  
43.1945567870367 45.8325181856483 42.7211272990786 43.1931731665131  
42.2577689927563

LOC554226 37.55264801907 38.0226905622357 38.5045333213784  
37.1894304543751 36.2691013181987 37.6455751461448 38.2280071951674  
40.4669141685209 36.7604001262514 38.2550371518309 39.6403089864678  
39.2839132447749

LOC554235 41.3387790895716 37.8217989841918 32.7043743065388  
47.0874209746031 38.6454098044474 45.8325181856483 44.9863726205428  
43.2551508830106 45.1899271235974 42.6793753550854 44.1148826235374  
44.8372404608604

LOC55908 38.5007204246293 44.0409178714232 41.2365089689635  
59.0965219753805 48.7288537840562 48.5835484742456 39.5496902678788  
41.9315419791594 48.9931786790166 45.5776159432079 46.7386599624801  
45.3763275588341

LOC57228 75.9236575152151 159.618353114269 142.880684604126  
62.9553576299033 178.881586334601 63.8740412329753 272.257070024902  
195.672836308456 168.883366756191 82.6884056099104 84.3946154220195  
106.398825125486

LOC57399 41.6354649482853 39.3999056968598 40.4882741869718  
42.0102671859606 39.0564222526273 42.157627240486 40.3302268293707  
39.2672712041774 42.357910063876 42.8936990772838 40.723990462047  
41.863927676552

LOC595101 48.5835484742456 55.5294887653184 59.2778887402357  
45.334106390212 55.1563703466328 42.4580504587581 49.540449125788  
53.3094843669564 51.4413099192899 53.9412154719864 42.911855821602  
66.3944891131864

LOC606495 39.9697332660833 44.8529259387308 47.3861758958576  
42.9358255168086 60.0736861987141 46.1513019317765 39.6535880152834  
44.5029690493211 47.4699236780425 40.3235655331796 42.0750889188255  
40.5703581862752

LOC606724 62.7669079605627 89.2444752405108 66.4079972657486  
235.723799298966 43.7783560914188 71.4518820434918 76.1869593072029  
70.8485003649841 45.2897806651929 48.0211752672327 59.0850755856409  
57.5372732453319

LOC613037 832.181997440212 774.8306350567 1254.34397143795  
905.76958446454 924.900902050757 513.57613902662 508.688028777582  
1279.02702402372 384.080719411412 1395.33665255999 1106.57048989685  
720.552354470517

LOC613206 44.2350046179299 44.1239711172417 43.5710871617107  
42.9358255168086 42.269054475455 45.7300501624017 47.1345949868029  
48.6441988290952 43.8482802038826 49.5265949137207 43.3085358214154  
43.4709415392696

LOC613266 38.7537364570873 39.6995529770239 34.8956628705329  
39.1706564265495 34.6227169056411 37.1317006162938 36.4098694708483  
35.0510338774593 36.9060997041453 41.4397539024976 38.8507804383261  
39.9519547348106

LOC619207 38.2530108052333 38.7537364570873 40.6737160001291  
38.0365987358005 39.0916553915607 39.6595129100865 39.1878770155069  
38.610211769318 38.1169703906207 38.3092241935352 39.5399188536544  
39.3737104145034

LOC619208 42.3433931248155 39.1982470626863 38.6727842796202  
31.6357375926754 39.7568367479301 51.6053353177789 36.634024014558

41.8417024632349 36.7267557061938 46.0119912782855 48.2050207071554  
35.6427313468066  
LOC63920 85.0753342967819 48.3077814647455 47.0940613507321  
46.0228732507872 48.6224651100733 56.8505380943422 50.8388984085636  
56.0496524902806 54.113533179847 74.4696354388511 61.7191344476295  
70.4262478188233  
LOC641311 46.0023068797812 44.3529919625344 40.7620472083159  
36.9912468186322 38.0598374201407 39.3841861812262 39.3585350448719  
36.8400213077707 37.7384958256497 37.0320432433314 40.3452320167286  
33.8196020406676  
LOC641365 42.2455707947223 41.2598458726002 46.9040704638073  
44.7980740332174 37.8679241954337 42.157627240486 45.4799270968969  
43.9366081640576 41.6616444147804 40.8049408996274 38.079222289614  
42.9887069977696  
LOC641518 40.9558083259517 39.5050383901884 38.9790184198145  
36.9376982271148 35.2642250366721 46.1513019317765 38.7745734037492  
39.2248354955045 36.6312676076142 39.1832968442811 40.2317542073211  
36.1190722948669  
LOC641522 45.6517320730042 40.5400384479766 41.2365089689635  
43.5627649099623 40.0599807618105 43.2805590023412 37.9430145836712  
40.5158867964016 47.7086093893038 44.2580151149956 43.1931731665131  
45.7562276914441  
LOC641693 47.1962846565261 46.6996902348633 67.9850517608624  
41.0726336841311 54.4586176399381 45.4882438975269 42.9803717121865  
47.4740726032707 48.3119523820103 44.4652605017595 40.547835538778  
45.0985088502363  
LOC641694 38.2083710281545 37.1685072112618 39.6451483836089  
36.890925044696 42.7982502551634 42.9695585740813 35.7055410599146  
36.8400213077707 40.137818555383 37.920964499903 40.0766543123257  
42.2577689927563  
LOC641697 44.8914371498528 38.6414316877471 43.1931731665131  
40.8681871019812 43.2484996523549 39.6251842352088 44.4639405506967  
45.2806199505029 42.1594905198929 41.6373771565199 39.6403089864678  
42.9887069977696  
LOC641699 39.9697332660833 39.5050383901884 43.401782064778  
43.5627649099623 37.956732373465 35.0970060242246 41.0381860307445  
41.6466169548846 38.2215591930186 40.7063426028871 41.6336636285875  
44.8372404608604  
LOC641700 55.4004611309636 48.7847528954724 61.0370242377391  
81.1189042503645 48.8381507187986 84.096146903568 45.8980298854198  
48.0582855095143 50.5785738734431 51.3351387089044 50.7159667633757  
51.0013344286851  
LOC641704 30.7315474127249 40.148780650831 41.1367478979484  
50.8567345921473 37.956732373465 40.1428591998404 37.3799542961839  
44.8997235283254 38.9006788676407 47.3791873993182 38.3684202018524  
40.4639532172338  
LOC641705 39.7576136507593 44.1239711172417 46.7508829977587  
45.7397504535169 39.6535880152834 43.5752393599169 46.0228732507872  
43.7396619462033 47.9035532886869 45.5776159432079 48.9754340235127  
42.4607795638552  
LOC641710 59.5000730792772 72.3297091475814 118.358996104366  
67.7121534934164 77.2608629053098 51.8103411703261 56.2181240696479  
54.5125550937898 62.275808835675 63.0119737420787 55.6972661824064  
51.138877923954

LOC641714 35.8208542506595 36.9994058279362 38.9790184198145  
48.9944486068347 43.2484996523549 33.3470732872681 39.4600924554505  
30.4430902995779 39.0775870687758 37.4302011516587 40.1742127891824  
42.0424641526302

LOC641716 42.1537476443423 44.2630383225933 44.1452943804044  
44.4367387274922 37.956732373465 47.0027453663546 47.5963750520409  
43.0390857698452 40.2274522635576 41.2276963324981 42.0750889188255  
45.1735152121056

LOC641719 33.9561816279577 34.2618170189676 40.6737160001291  
41.7614975630362 35.3327761997046 41.554942319225 36.4098694708483  
35.6825474397235 37.10170285405 42.0621425894624 40.6373400186325  
43.1805016690297

LOC641721 41.9407041937973 40.2493681589104 43.0971787292711  
43.8002456102021 40.8873907150245 38.1169703906207 45.1017494688414  
42.8482181313226 42.0621425894624 42.6793753550854 39.0550139257658  
47.8931773060789

LOC641724 42.0532901689036 43.5873188565519 44.6032218589199  
42.1273928203021 44.147557390293 35.5158505219112 42.4939802311136  
40.7311497914871 38.6322728994674 43.6033221838149 46.824299585607  
44.0451487108213

LOC641726 35.2267149016596 41.8073910693411 42.5406888281114  
39.853175885492 37.5556299264699 38.5252456306656 43.1931731665131  
36.9355798143571 41.074824727477 35.7202909649682 39.4410515050885  
34.1509644696334

LOC641733 37.4554876386402 44.2630383225933 44.2405728317107  
39.3750969348308 47.0954207417646 42.6575535390785 41.1507980856436  
40.5158867964016 38.4344387289956 35.195364621675 37.9946685306274  
40.9683275553869

LOC641738 38.6454098044474 36.4002279956519 43.401782064778  
39.6292788039793 40.0599807618105 38.8336427948187 42.2577689927563  
43.1567024035183 42.0621425894624 44.7958122466628 38.745552403895  
43.5738557773903

LOC641741 39.5676051939342 38.5252456306656 36.0306975524309  
42.357910063876 44.5668141895992 40.650742261428 37.830876898596  
41.6466169548846 41.4636047919453 45.2556760873335 47.0940613507321  
40.9683275553869

LOC641742 46.5549623118323 42.3550738181144 40.4882741869718  
39.6292788039793 41.8806343997257 37.9951997351435 42.357910063876  
41.5464765641928 45.0017158586743 45.5776159432079 41.0050831223107  
45.3763275588341

LOC641743 42.5193208629123 46.0023068797812 43.6670755115848  
39.1706564265495 46.9906120932727 44.7804080899431 38.5066108855005  
40.6171774724171 41.1742244762318 43.0919221375514 42.0750889188255  
43.5738557773903

LOC641744 36.1232327599945 32.7800533388945 37.5597671487621  
37.9875302985336 39.859345745831 33.4492509999281 33.4316681623175  
37.6557714476853 35.0305278582179 34.9138625012006 35.9563099719284  
34.0382693188794

LOC641750 45.2421183842044 44.6918600441328 43.0016969050339  
37.9230440150891 40.831207953647 42.6211340086915 39.3585350448719  
40.188873541274 43.7630587657205 50.6486940895674 44.4688999098904  
46.5650556481721

LOC641751 38.957687788868 39.0102066700839 44.7829632472754  
38.3166554965434 43.3332476888305 38.3418933808844 37.2892641289258

36.5393857306744 36.0741672064298 36.6893251782922 40.547835538778  
37.0953622406687  
LOC641753 41.5421429082231 36.6968906669565 42.4580504587581  
37.8442841690502 36.4434672195785 44.0804700754786 36.5352572191451  
36.2539950294089 34.3842972343227 40.6022003765153 37.9946685306274  
40.4639532172338  
LOC641765 48.6621527194963 47.6914221838216 44.014441886238  
47.1332119496722 58.3564461855595 38.9661430990729 51.8667932650345  
49.2901038327894 55.0748878261048 46.441301934328 47.7996867053249  
50.7487159427973  
LOC641767 44.0328992213727 40.4359177791566 44.3344900481112  
39.853175885492 43.9450023643394 40.4359177791566 36.4098694708483  
43.844855336215 46.581796165231 42.0621425894624 34.174642681781  
48.0350549043063  
LOC641772 40.0270326792985 40.2973086894872 40.8420925848403  
42.1607322031054 39.9042726867255 43.4681646416585 43.5898425390297  
39.2672712041774 37.5764485234171 39.9948390976317 38.7324136192721  
42.8332435050083  
LOC641785 42.9104454767916 43.3458769998118 41.6079958749402  
41.8778873678551 39.5595233162192 41.3553369544097 37.9430145836712  
41.7419877611072 46.581796165231 39.2623423164488 45.9104478407175  
41.2437378488025  
LOC641788 41.4508241771315 45.3486182278177 47.7737810047679  
44.4367387274922 49.8304479381623 44.6524308640784 40.9157352260901  
42.2577689927563 40.3316153483289 38.1042454705119 48.5292718280498  
53.4735821194294  
LOC641798 72.9154861179393 61.5429260998857 71.8706847571669  
75.2475238554276 67.8233625051884 66.5234828659154 83.0647477737971  
58.676230030835 66.1448688879431 55.0016608333828 70.7045582269595  
61.2685222381296  
LOC641801 42.442231667357 45.4143854024453 37.9482157381008  
42.5664883002833 44.5668141895992 48.0350549043063 37.4772922422734  
38.956280281655 45.2897806651929 39.0648733099061 45.9104478407175  
37.7526485343328  
LOC641802 39.9697332660833 46.0023068797812 36.5474283500601  
41.5464765641928 43.1252272136667 42.357910063876 43.0930293831497  
45.9604707098953 40.4220196471124 43.0919221375514 41.3553369544097  
42.0424641526302  
LOC641804 59.7179445506128 56.2305155589239 53.5698357689852  
46.7577982595088 54.9249759425252 48.7781962164988 59.5205055437765  
49.8344973836834 62.6386437936516 46.2286164776607 48.5292718280498  
49.0655215909632  
LOC641805 43.2724556187214 64.9959712888709 82.9449579428926  
38.2041059863839 61.5236837309467 39.6251842352088 74.1353964055485  
50.628152951493 163.766548456924 67.4760456862775 43.9450023643394  
44.5432192783161  
LOC641806 44.7915315085948 44.6918600441328 48.6037684272115  
46.7577982595088 45.2556760873335 46.4648868771662 42.1607322031054  
46.9986083378817 39.4762546236449 47.2299678280724 42.911855821602  
53.4735821194294  
LOC641810 35.3227485563945 40.4359177791566 37.7384958256497  
50.7046706880325 39.1650142708257 39.132725377815 43.4544762830742  
34.806104801006 37.9273653326866 35.195364621675 39.2542963855807  
43.4709415392696

LOC641815 39.3709357615493 38.9338521051669 36.3604951341921  
41.7614975630362 41.467005949568 42.6575535390785 39.4600924554505  
39.7509165247419 37.2810767789306 38.3092241935352 40.9157352260901  
39.8497227447888

LOC641819 43.1805016690297 39.8695929627783 41.8751578329365  
42.6913548400127 39.5595233162192 38.4330755397458 39.4600924554505  
46.4672637826582 42.357910063876 37.2089297656361 43.7585538437696  
46.0633179231318

LOC641820 42.1537476443423 43.2649781354792 45.989212296035  
48.4916117779992 42.0709558258414 41.3553369544097 46.4388841354122  
44.0390019242862 37.5469247328848 46.5650556481721 41.6336636285875  
45.2783024981315

LOC641823 45.6517320730042 45.9266745571724 48.7039705048129  
51.949834638817 49.7235523248653 46.6872654833579 44.7255207589606  
48.1591264215184 45.0997987980157 48.8623729374733 49.532546810992  
53.2046867327331

LOC641825 46.3390850717989 55.0897019602305 52.7005092555102  
90.8188865732032 48.5000946421718 72.3523300799007 45.4799270968969  
55.9303347977781 45.8325181856483 52.8928296360463 47.0110068985119  
61.356483470053

LOC641834 51.2851682978581 38.1312950900467 49.2041300973417  
40.7481155008596 48.8381507187986 47.0940613507321 45.7452456977857  
51.555506218204 44.8997235283254 42.9866214102525 37.2018803984555  
38.2350720635382

LOC641835 43.3638918705225 41.159706131351 38.2280071951674  
40.9607305725196 48.2748123114598 38.2293008890613 45.8980298854198  
45.1714698794331 42.1594905198929 37.8217989841918 40.547835538778  
42.357910063876

LOC641841 39.1590964332473 41.0678614026819 45.1569741609597  
45.5869891570251 44.7829632472754 37.2686490268265 46.8613212048981  
44.9977782988116 39.2809305246091 42.4594149893798 42.911855821602  
42.357910063876

LOC641846 45.7356815244513 41.0678614026819 44.696023817801  
43.6726153508978 35.2163900400329 38.3418933808844 41.0381860307445  
46.7980335276155 42.5406888281114 36.9102644736882 40.8225507267584  
41.4508241771315

LOC641848 65.5495324730507 81.6529991377083 74.2122914028677  
101.144615206297 88.6838633595745 113.716666562787 80.4479092568961  
91.3607028449916 89.4747568145717 117.293778127059 105.45765455249  
134.024691118762

LOC641849 44.7915315085948 57.5941849631773 56.0477607422828  
69.3525901554637 66.0411740221276 68.4323624797175 57.7805922926828  
48.272324215504 59.2566572428546 55.9283039581662 51.7538628098347  
73.5599394565136

LOC641851 42.9104454767916 43.7644428186265 37.0642268327439  
50.0526763693329 39.7568367479301 41.554942319225 41.253645578517  
38.8495095797881 38.9006788676407 50.1649089793069 39.2542963855807  
41.4508241771315

LOC641852 37.7384958256497 44.1239711172417 35.8265993915844  
49.5424425850549 38.3561682218911 37.4782441311626 47.4439407315335  
45.7476095696859 44.4395580493118 43.4885245598939 40.547835538778  
44.5432192783161

LOC641858 43.3638918705225 38.3322849790657 41.785676764591  
46.0228732507872 37.3508690072156 38.6414316877471 38.941855825269

46.7980335276155 41.1742244762318 39.8873706855774 39.7342718293432  
40.3691324547049  
LOC641860 41.9407041937973 44.0409178714232 42.8270038153139  
51.949834638817 44.3557408297309 43.6670755115848 43.0930293831497  
41.3506832276112 42.8036731479932 52.6879797806876 43.0016969050339  
43.5738557773903  
LOC641875 38.8561375693335 41.6466169548846 43.1931731665131  
40.7481155008596 44.4489662507893 41.2567470068038 38.1793598983615  
44.1311654985682 43.5669306063196 42.4594149893798 43.3085358214154  
35.7451401627836  
LOC641896 40.7609952437622 42.2577689927563 41.6079958749402  
44.9370339275041 44.2607789091176 44.0804700754786 44.9863726205428  
39.1652965788406 43.2761454096265 46.7646877499666 39.2542963855807  
43.9541718254769  
LOC641901 44.5282181324797 34.7135536792489 38.9790184198145  
41.5464765641928 42.9090346219023 41.159706131351 45.1017494688414  
42.7431359850339 44.619512785899 43.7303813515864 39.9899430628542  
44.3521099857368  
LOC641905 32.0823591288671 40.148780650831 39.991353369336  
43.6726153508978 29.4322896559759 36.6996187567892 36.4098694708483  
41.9315419791594 46.9739160257217 41.7405682794166 39.4410515050885  
36.5474283500601  
LOC641908 44.7915315085948 43.8495248991589 42.4580504587581  
51.7739270955254 42.269054475455 40.5281496800812 45.223075311113  
41.8417024632349 42.6366765186182 43.6033221838149 38.2795150354677  
43.2776458914333  
LOC641912 45.5758521267508 45.6533175604486 44.8872784170036  
47.9915414951747 43.5544347011646 38.9378717994178 40.4359177791566  
42.5435283762933 46.581796165231 42.0621425894624 36.9060997041453  
50.379587451669  
LOC641914 40.5654775358427 45.1694246393676 39.3709357615493  
37.5382094267692 37.956732373465 42.8598805316863 41.706879587091  
42.157627240486 47.4699236780425 39.6719190054379 39.4410515050885  
48.6037684272115  
LOC641926 41.4508241771315 39.1982470626863 43.9450023643394  
33.5578650644246 38.1644569189523 43.0860383229288 38.8417151851134  
37.33030683349 43.9450023643394 34.1648535095605 51.2318935933116  
39.1553169409075  
LOC641929 42.3433931248155 46.1569135229922 41.8751578329365  
42.2496337895968 45.3675390992851 40.5281496800812 44.6032218589199  
34.5886782974123 45.3756389170606 41.3321861371202 42.7275315121163  
39.3575468494941  
LOC641931 38.2083710281545 35.8227939208521 34.3633615460307  
34.6468794865286 36.8059561571675 39.2248354955045 43.5627649099623  
34.2814697823693 38.9006788676407 31.4813677993933 42.5426057453993  
36.5474283500601  
LOC641938 40.7609952437622 42.5269793679335 41.3366779545815  
48.856176220627 46.4343327861696 43.2805590023412 46.8613212048981  
43.2551508830106 45.6582729799009 45.5776159432079 44.7926323492519  
46.0633179231318  
LOC641939 43.2724556187214 43.3458769998118 45.1569741609597  
39.6292788039793 38.4540849632254 37.3799542961839 44.0687697278114  
37.33030683349 38.7298222155532 43.6033221838149 39.153226699662  
39.3575468494941

LOC641941 47.3791873993182 46.6314009405034 43.0971787292711  
39.7411455670172 42.9090346219023 48.6621527194963 51.0013344286851  
44.1311654985682 43.6670755115848 57.165971310746 47.5439485437351  
41.2437378488025

LOC641942 38.304249186058 40.2493681589104 42.0621425894624  
37.1894304543751 45.6895223823001 43.2805590023412 37.1643693306382  
33.7818132446042 49.4786466722535 38.0078357808393 38.745552403895  
41.9430737035925

LOC641943 43.3638918705225 43.5182502375207 45.4865173433646  
46.7577982595088 44.3557408297309 48.260931742163 48.4859552186772  
37.4484310268909 41.863927676552 40.1179210534118 43.844855336215  
45.9693232070002

LOC641944 47.2862299990938 46.4385386401326 37.0642268327439  
39.9697332660833 37.5556299264699 37.2686490268265 39.3585350448719  
39.5466975353131 43.6670755115848 40.1179210534118 37.1059647239814  
36.5474283500601

LOC641945 36.9060997041453 41.159706131351 44.1452943804044  
42.1273928203021 39.3667161654772 41.2567470068038 41.3594868055879  
43.4544762830742 38.3418933808844 38.4187686307607 37.0180934800573  
38.9496515344837

LOC641947 42.6036491382658 40.148780650831 36.769073068743  
37.1894304543751 35.0181575202066 41.4508241771315 43.3262148375525  
35.5798430594271 42.357910063876 40.8049408996274 39.153226699662  
32.6203270051744

LOC641948 46.8141313516997 45.0905928998779 46.6588655218735  
51.7739270955254 41.8806343997257 43.4681646416585 49.1067959632109  
48.3590401011623 47.0804681460898 44.3648993568405 38.1835938174625  
49.3087627580849

LOC641950 43.3638918705225 40.148780650831 37.5597671487621  
40.9607305725196 37.7576900881741 35.314469458379 46.3057385979341  
40.7311497914871 37.10170285405 36.8059561571675 39.7342718293432  
35.5523662009011

LOC641953 51.2851682978581 43.683792219729 42.5406888281114  
41.7614975630362 40.7779767565889 47.0027453663546 50.5252048155459  
44.797320243931 46.3203995372658 41.4397539024976 55.854474649572  
50.1579724208315

LOC641955 40.4639532172338 36.1232327599945 42.9104454767916  
43.9282059368202 37.6527901109005 42.157627240486 39.5496902678788  
38.745552403895 40.4220196471124 41.1222709786153 41.9083581529276  
39.5418280570561

LOC641957 38.2083710281545 35.6434124419782 36.769073068743  
41.5464765641928 40.9950639693255 40.9506062495231 42.9803717121865  
41.5464765641928 44.2607789091176 40.2112371512838 43.0971787292711  
43.0930293831497

LOC641958 47.8249696958403 38.5252456306656 41.6977706798234  
43.6726153508978 40.8873907150245 41.0582900711341 44.0687697278114  
45.1714698794331 41.1742244762318 40.1179210534118 40.9157352260901  
40.5703581862752

LOC641959 49.2595762436995 44.2630383225933 49.6347864008749  
44.9370339275041 49.8304479381623 48.260931742163 44.3440839686558  
51.555506218204 50.2223403889892 46.2286164776607 40.3452320167286  
45.9693232070002

LOC641964 48.7646976789783 37.3634897565502 40.7620472083159  
44.265834798964 46.0977687311222 40.7616966228404 45.3597029614942



46.2779564481158 43.8482802038826 43.1839109702714 45.0589947942306  
39.9519547348106  
LOC641972 39.1590964332473 42.6939394537076 39.991353369336  
36.6501141438378 40.0599807618105 41.554942319225 38.0598374201407  
41.1575777497576 45.5779686360641 39.9948390976317 38.745552403895  
37.0953622406687  
LOC641975 47.0940613507321 41.9894412416874 40.8420925848403  
46.4555908533915 39.9697332660833 42.0574848021044 41.0381860307445  
42.0494116081998 45.4799270968969 44.1379638573455 41.8168470823451  
44.2527566343661  
LOC641977 40.9157352260901 41.0678614026819 46.1653991089885  
44.265834798964 42.3685136297603 43.5416683728269 42.9803717121865  
40.2819379659218 37.7384958256497 41.1638563416981 41.3553369544097  
44.4067063477243  
LOC641978 38.385865183581 49.9085372049438 51.5292723244077  
63.9570596163747 54.5683518971261 50.4022543872993 50.3519150282938  
52.0503062610092 43.7630587657205 43.4885245598939 47.299647867533  
47.8931773060789  
LOC641982 38.5648843914189 39.7835513496873 41.1367478979484  
40.8681871019812 45.8051846088552 43.2805590023412 42.8684958525042  
38.2782436497441 43.1805016690297 46.2286164776607 42.170702295259  
40.4639532172338  
LOC641983 39.2076937845359 44.1533327883807 41.6550823405646  
41.8291484190524 41.467005949568 43.9724628401189 43.1931731665131  
44.7044140979108 42.4784375889044 40.2493681589104 43.7585538437696  
43.2776458914333  
LOC641987 40.8681871019812 41.2598458726002 37.6557714476853  
38.5252456306656 36.9060997041453 40.244271403831 41.9393838138203  
41.4508241771315 42.5406888281114 42.1622837416589 45.7328341667151  
44.3521099857368  
LOC641989 48.9906383294199 48.2220547806679 51.5292723244077  
49.3654837541353 41.1868052124344 36.0306975524309 37.9430145836712  
52.9813204449021 50.7619345314571 50.3388505346542 48.6184776976167  
54.0374522273907  
LOC641992 55.4004611309636 54.0461131287999 55.094385444315  
67.1961800572759 45.3675390992851 48.1591264215184 48.8319884367456  
60.2691630545162 63.4531374125233 50.4234835272833 51.9302027391447  
58.112348043634  
LOC641994 46.6348258763289 46.0023068797812 40.931294690669  
39.853175885492 40.8873907150245 40.9506062495231 44.9863726205428  
46.4672637826582 47.3791873993182 42.0621425894624 37.5583886316038  
41.0657892043496  
LOC641995 43.844855336215 40.3384318592985 40.4070046183108  
36.890925044696 42.0709558258414 37.1317006162938 37.4772922422734  
43.0390857698452 40.6957787921451 38.1042454705119 38.5668610487033  
40.0557788909923  
LOC641996 54.5358897781765 56.2851430356168 55.3812135024656  
62.6048727240291 63.4753448572245 52.7156971154405 57.7805922926828  
50.1833483241864 46.1101825640108 38.6454098044474 51.0492389286271  
52.8455400026194  
LOC641999 39.5676051939342 40.4359177791566 38.0452862258803  
37.8442841690502 38.1644569189523 35.9305494063137 34.6720534245631  
39.9576138799997 39.1790517315259 41.8613406887824 37.9946685306274  
36.9976231206067

LOC642000 38.1169703906207 35.6434124419782 31.8308004302547  
37.5382094267692 39.5595233162192 33.0463640202858 42.7431359850339  
40.6171774724171 37.0126425326534 40.8049408996274 43.6629145624937  
36.3454320848591

LOC642003 44.6231541342 42.6939394537076 42.2577689927563  
43.1847628331565 45.5809132232681 47.0940613507321 41.5817737564592  
43.9366081640576 40.9901805728485 41.9666541498638 45.7328341667151  
43.3744503319109

LOC642005 37.6397652536077 36.7976562409506 39.7411455670172  
37.9875302985336 38.1644569189523 42.5660695551615 40.6750540874299  
38.956280281655 38.5252456306656 43.6033221838149 41.9083581529276  
40.8681871019812

LOC642008 39.5676051939342 42.6939394537076 42.3536549114165  
51.5913529948887 39.2608760193011 42.2577689927563 44.0687697278114  
44.4031868028216 39.6609238036815 41.3321861371202 37.9946685306274  
44.5432192783161

LOC642009 40.6559419616644 40.7952353240579 40.931294690669  
34.8137085420423 40.6723334103791 42.157627240486 38.7337086062875  
34.2814697823693 38.2215591930186 38.0078357808393 39.4410515050885  
37.8490162439785

LOC642011 43.6706764143908 38.8336427948187 42.2577689927563  
44.265834798964 43.6587492470348 41.8613406887824 40.2154497375715  
46.2779564481158 46.581796165231 38.957687788868 44.8872784170036  
47.2131144508464

LOC642014 39.4710743516517 43.3458769998118 37.6557714476853  
39.9697332660833 42.0709558258414 43.3785777889265 37.7136011474903  
38.5457716679071 43.4656637536244 39.6719190054379 38.956280281655  
35.7451401627836

LOC642017 75.3761360028971 59.4908919662362 72.2797007105795  
84.0899854321388 90.8335894699136 78.0586153423713 64.0985088513857  
72.3822545261582 75.1782851135559 74.4696354388511 68.0960719007162  
69.4383198054368

LOC642018 42.2455707947223 42.2577689927563 44.8872784170036  
44.550322123994 46.0977687311222 45.7300501624017 39.7576136507593  
42.2577689927563 40.2274522635576 43.844855336215 41.8168470823451  
45.5800840647989

LOC642031 340.429325650126 181.565843182713 108.700838142885  
110.431464700539 190.703466372947 112.23915619297 122.316617618658  
113.064858029749 200.41782363596 93.6787442149817 86.3374157614394  
81.7566533443175

LOC642032 40.0557788909923 42.6939394537076 37.3687900733549  
45.7397504535169 44.5668141895992 43.7630587657205 46.8613212048981  
41.6466169548846 38.4344387289956 44.4652605017595 40.9157352260901  
39.1553169409075

LOC642033 60.6441065119394 62.1642339365777 67.8010199320754  
55.6481366056639 66.7426485694967 65.3096524773304 79.5707751325986  
70.18107651423 47.6195009345747 63.5107036952143 83.7392835102145  
72.9580216367379

LOC642035 39.6609238036815 43.9421822132391 41.437237454134  
109.503117647487 44.3557408297309 44.5544727111028 47.5963750520409  
38.745552403895 46.4861258030402 42.6793753550854 44.7114813656401  
46.7182294568603

LOC642037 47.7267190613906 41.0678614026819 39.7411455670172  
44.6905691366696 40.6723334103791 46.1513019317765 42.8684958525042

42.9301944191913 45.0997987980157 39.7835513496873 43.7585538437696  
45.7562276914441  
LOC642044 41.7397731376692 38.9338521051669 39.7411455670172  
34.7266486944713 39.859345745831 37.0180934800573 36.4098694708483  
37.1317006162938 37.0126425326534 40.3235655331796 32.6463318577756  
37.8490162439785  
LOC642047 39.5676051939342 43.0971787292711 43.4709415392696  
44.550322123994 43.4544762830742 47.6803619768589 41.9393838138203  
51.4360013601805 42.6366765186182 41.6373771565199 45.390192977585  
45.5800840647989  
LOC642049 40.5654775358427 40.7952353240579 40.931294690669  
45.1944222548351 42.7107928951766 41.2567470068038 37.4772922422734  
39.0620487644635 41.4636047919453 44.571915452417 44.3763859390287  
47.6040671292013  
LOC642062 39.9697332660833 41.8073910693411 45.989212296035  
48.4916117779992 44.5668141895992 47.3791873993182 48.6395795163502  
41.8417024632349 48.2123120250343 42.6793753550854 45.8180710486329  
42.1537476443423  
LOC642072 43.0930293831497 44.5152708955623 45.8844325913247  
42.6913548400127 44.2607789091176 46.263826584899 37.7136011474903  
36.6452480995946 53.2046867327331 43.0919221375514 39.5399188536544  
39.8497227447888  
LOC642077 41.1523487516364 44.2630383225933 39.9101908547397  
36.7892997857376 39.5595233162192 39.6251842352088 45.223075311113  
36.1375121409002 40.6957787921451 40.2112371512838 40.9157352260901  
37.8490162439785  
LOC642082 82.1323695817857 89.19837608959 83.8679756709676  
125.333208461509 83.5069968129733 88.3503153240018 109.062415049404  
81.6529991377083 81.8983491901699 91.2016867646161 73.3321469094819  
80.2727193069362  
LOC642083 45.5758521267508 40.9731067463382 36.4564050256915  
40.9607305725196 38.8456942580061 35.2067831864574 36.5352572191451  
40.3357777530419 44.0519245668737 41.9666541498638 41.0808257270221  
35.1451084093692  
LOC642093 43.2724556187214 37.8217989841918 37.0642268327439  
102.177189421378 42.0709558258414 35.7034203372528 43.4544762830742  
42.357910063876 42.357910063876 40.8049408996274 39.9899430628542  
40.9683275553869  
LOC642097 44.1294459089314 36.0366673493555 38.5045333213784  
48.4916117779992 36.5393857306744 42.0574848021044 40.1235656101329  
41.3506832276112 40.8970401536578 37.3179578037963 46.6442692119997  
42.2577689927563  
LOC642101 40.6559419616644 34.3715326040967 40.0998167098057  
40.1804147506786 38.9496515344837 42.5660695551615 38.4005795891396  
35.6825474397235 40.2274522635576 41.7405682794166 34.7308008643142  
33.6902293666089  
LOC642103 38.1169703906207 39.6123051184545 35.6139301508335  
67.1961800572759 39.859345745831 48.4758590019384 41.3594868055879  
36.9355798143571 42.8036731479932 41.0057887014368 42.7275315121163  
39.9519547348106  
LOC642104 46.263826584899 37.1685072112618 45.310660704531  
37.0732977341185 41.0885562160946 42.157627240486 41.3594868055879  
41.3506832276112 34.5633623842083 38.957687788868 35.9563099719284  
37.3600014814388

LOC642105 40.5654775358427 41.2598458726002 38.3166554965434  
44.4367387274922 44.5668141895992 32.6368705146258 39.7576136507593  
43.844855336215 42.0621425894624 38.528621456378 39.6403089864678  
42.8864415494484

LOC642106 37.7384958256497 39.9697332660833 41.785676764591  
33.9645433044281 37.4470183315826 35.9305494063137 32.1218888714537  
39.2672712041774 32.8704945047196 34.9138625012006 31.3983249770297  
41.5536168238478

LOC642109 44.3355304829989 46.3635803515159 48.2883694323339  
44.6905691366696 48.3814421939888 47.2927436772465 48.8319884367456  
47.9942520395434 42.8036731479932 45.9004543328976 44.2925355984056  
44.3521099857368

LOC642110 42.5193208629123 39.6995529770239 41.437237454134  
40.0698728584484 37.4470183315826 39.2985791324641 43.4544762830742  
34.8949555140527 41.7627910693483 38.745552403895 39.5399188536544  
39.0536056496869

LOC642111 33.0463640202858 33.1817617228171 29.9617615620508  
32.4383992781552 30.422292833952 34.7983399096627 34.9344532055397  
30.4430902995779 29.5408011993809 33.6188027862739 28.4576210094757  
33.5578650644246

LOC642112 36.3649677956953 45.4882438975269 45.3974838013476  
39.3750969348308 40.7779767565889 42.5660695551615 40.5585676679482  
39.7509165247419 43.4656637536244 38.745552403895 39.2542963855807  
39.7411455670172

LOC642113 370.330147221688 8545.48005557056 2633.34100695103  
15358.8899487375 51.7983110178095 124.112216491975 283.21175871127  
598.970109654466 72.0655217037557 54.8979897528792 44.8872784170036  
58.7382738968248

LOC642118 43.2724556187214 48.7847528954724 41.8751578329365  
43.6726153508978 44.0451487108213 40.3357777530419 51.9421032049606  
39.853866204927 41.1742244762318 44.4652605017595 40.8225507267584  
41.0657892043496

LOC642119 41.3387790895716 42.6939394537076 40.931294690669  
45.0798408927912 39.0564222526273 47.57333603903505 41.8315602975157  
43.2551508830106 41.3803269429468 42.1622837416589 39.153226699662  
42.9887069977696

LOC642120 41.3387790895716 39.0894172982439 43.4709415392696  
46.7577982595088 43.844855336215 39.132725377815 39.8695929627783  
42.5435283762933 48.5792058061372 43.7303813515864 38.8507804383261  
43.4709415392696

LOC642121 39.9697332660833 35.0222940937513 41.9666541498638  
42.6913548400127 37.3508690072156 39.6251842352088 38.2933870238743  
38.956280281655 37.1820543575123 38.8507804383261 40.1742127891824  
39.2469742642337

LOC642130 44.7044140979108 45.1694246393676 43.5710871617107  
47.9915414951747 41.3755760434934 36.9060997041453 46.8613212048981  
44.2159020605784 39.6609238036815 42.4594149893798 41.6336636285875  
43.8575940017119

LOC642132 45.8108990837624 38.1312950900467 33.0260566875355  
47.3574589211166 38.9496515344837 41.0582900711341 42.7431359850339  
44.5029690493211 46.2027193115397 39.8873706855774 40.0766543123257  
41.4508241771315

LOC642133 46.8141313516997 43.5873188565519 41.6977706798234  
41.8778873678551 48.6224651100733 36.1190722948669 40.7910160811527

44.797320243931 47.3791873993182 43.9450023643394 41.0050831223107  
44.9070250604284  
LOC642134 40.3478825593224 39.6123051184545 41.6977706798234  
35.0448343468967 43.4544762830742 36.1190722948669 45.4799270968969  
44.293922970134 41.9635525160083 41.1222709786153 45.6348103033479  
49.8253396161069  
LOC642140 37.3463875295726 40.5400384479766 41.1367478979484  
43.9282059368202 42.269054475455 39.4953494583071 35.1307934330047  
46.8954576545929 36.6312676076142 39.9948390976317 34.174642681781  
39.0536056496869  
LOC642141 44.5282181324797 38.1312950900467 39.4710743516517  
33.4819739460148 39.6535880152834 33.0463640202858 35.9058393060637  
39.4710743516517 43.0930293831497 36.8059561571675 39.9070785037411  
38.8495095797881  
LOC642144 40.5654775358427 41.0678614026819 39.5450079747895  
39.7411455670172 44.3557408297309 40.8634043028528 42.7431359850339  
40.047314525032 42.2577689927563 35.93950183586 42.6366765186182  
37.3600014814388  
LOC642147 40.3478825593224 40.4359177791566 45.5883690965192  
42.2496337895968 42.0709558258414 37.9003288112261 43.8206425661746  
39.3709357615493 39.853866204927 41.0057887014368 44.4688999098904  
40.6614700944853  
LOC642148 44.436995101921 43.8495248991589 40.301483914446  
39.9697332660833 42.6022652963326 34.8956628705329 44.8643898647322  
38.8495095797881 38.6322728994674 38.0078357808393 43.0971787292711  
43.7672102682067  
LOC642149 35.8208542506595 38.9338521051669 41.437237454134  
39.2780515621926 42.269054475455 39.3841861812262 39.6535880152834  
43.2551508830106 34.2973261206803 31.8890957468737 43.5710871617107  
38.8495095797881  
LOC642153 38.1169703906207 36.6002100641539 36.178547300352  
39.3750969348308 37.956732373465 36.6996187567892 37.9430145836712  
35.1738399826814 34.3842972343227 32.406093465115 33.1645364749371  
34.3409660445447  
LOC642154 48.7646976789783 42.8542642792862 43.9450023643394  
40.8681871019812 44.4489662507893 39.3841861812262 43.5627649099623  
46.4672637826582 47.1744296124496 47.3791873993182 45.310660704531  
35.2448979801094  
LOC642155 43.4626049853157 49.0697565324841 44.7829632472754  
43.074472921841 37.6527901109005 41.0582900711341 40.5585676679482  
33.6816578730693 42.1594905198929 36.1550293353654 45.310660704531  
37.5556299264699  
LOC642156 38.7537364570873 46.6996902348633 42.3536549114165  
46.614092935749 54.5683518971261 46.7800033479223 45.1017494688414  
40.4359177791566 44.7058233759912 44.8997235283254 41.9083581529276  
48.8670821164567  
LOC642160 43.2724556187214 40.4359177791566 39.4710743516517  
46.1673159982664 51.3511088648386 40.9506062495231 42.0605906240248  
46.7980335276155 41.7627910693483 39.6719190054379 43.0016969050339  
37.9607839934735  
LOC642161 47.1962846565261 51.7983110178095 58.2251348002272  
84.0899854321388 47.5647821785529 43.5752393599169 48.6395795163502  
47.0940613507321 44.7058233759912 43.1839109702714 49.5923712603197  
44.1452943804044

LOC642164 37.0320432433314 42.4493032770053 39.2707964550441  
43.3078542962968 45.3675390992851 37.0180934800573 40.9157352260901  
36.8400213077707 39.1790517315259 38.4187686307607 35.9563099719284  
36.6603338274678  
LOC642165 49.6241203903354 40.8880530359822 43.3085358214154  
39.853175885492 41.3755760434934 42.357910063876 46.0228732507872  
45.4757965005055 40.9901805728485 43.9450023643394 48.1352470945488  
43.5738557773903  
LOC642166 35.4287975493553 31.498275130159 35.9305494063137  
38.6414316877471 36.3390947880186 37.1317006162938 38.0598374201407  
38.5457716679071 36.7267557061938 37.0320432433314 36.2435874904689  
37.6557714476853  
LOC642167 47.0940613507321 45.0905928998779 43.4709415392696  
33.3231576795423 40.7779767565889 41.2567470068038 53.1884505015411  
46.3685439301234 46.3203995372658 43.4885245598939 40.3452320167286  
38.2350720635382  
LOC642168 43.3638918705225 40.0527893189096 41.6977706798234  
43.1847628331565 37.956732373465 42.8598805316863 47.1345949868029  
45.7476095696859 40.8970401536578 43.0919221375514 42.2618615571566  
43.4709415392696  
LOC642169 37.8386378737561 42.0709558258414 43.0971787292711  
47.481302504066 42.6022652963326 41.4508241771315 42.8684958525042  
43.7396619462033 41.4636047919453 44.6918600441328 40.1742127891824  
39.8497227447888  
LOC642173 43.1805016690297 46.0023068797812 44.696023817801  
50.5310598656998 37.5556299264699 39.7394181011603 43.1931731665131  
44.5029690493211 43.6670755115848 51.5855515705917 43.844855336215  
40.7704587752083  
LOC642176 40.9558083259517 32.2133093774284 40.0998167098057  
38.2041059863839 38.4540849632254 40.9506062495231 56.3376046940285  
41.9315419791594 48.6494451061637 36.8059561571675 39.9070785037411  
36.3454320848591  
LOC642178 34.9138625012006 44.4411734611229 37.5597671487621  
34.3595588146954 32.5318884330468 33.0463640202858 34.5633623842083  
40.3357777530419 34.1294694030979 35.93950183586 38.4689132737495  
32.0636251428594  
LOC642181 40.4639532172338 38.0226905622357 43.1931731665131  
36.9912468186322 35.2163900400329 42.2577689927563 41.253645578517  
46.8954576545929 42.5406888281114 40.1179210534118 45.8180710486329  
41.2437378488025  
LOC642183 43.0001432913058 44.8529259387308 45.3974838013476  
47.0874209746031 51.5888395924843 52.1024135605001 44.4639405506967  
45.8669209716694 45.6582729799009 44.8997235283254 45.310660704531  
47.2131144508464  
LOC642185 41.0608773166058 44.3529919625344 50.0748292497578  
40.1804147506786 42.0709558258414 42.750861693377 43.1931731665131  
46.695848687694 42.992884918158 40.7063426028871 46.972521499515  
41.4508241771315  
LOC642187 42.0532901689036 42.4493032770053 40.8420925848403  
38.6414316877471 36.9702228618069 43.7630587657205 40.3302268293707  
47.8947595316832 36.6312676076142 38.528621456378 47.4630625313159  
44.4475838947656  
LOC642188 40.3478825593224 43.8495248991589 36.8730514568925  
45.7397504535169 41.7929491793697 42.750861693377 38.2933870238743

43.844855336215 40.5912213523345 38.8507804383261 46.2560238004757  
38.1421709520616  
LOC642194 41.5421429082231 45.5842286511645 41.0356368374708  
42.357910063876 45.1137938810047 39.6251842352088 35.6056062164318  
39.853866204927 38.1169703906207 47.611018474151 41.0808257270221  
47.9566297250148  
LOC642196 35.7012997405508 46.4385386401326 45.6989664108554  
38.6414316877471 35.6434124419782 38.7340969861754 44.9863726205428  
41.9315419791594 43.4656637536244 37.3179578037963 38.4689132737495  
45.6692241948108  
LOC642197 133.163926420863 262.024495926094 182.079641528208  
169.251790128723 225.389113475883 127.836645375421 158.321459945365  
128.576322740245 154.232642598588 97.1201502245778 98.1835264890769  
124.409631245033  
LOC642198 32.9174234020987 36.9994058279362 30.1388203764747  
32.4383992781552 32.2133093774284 34.7983399096627 32.4466419672036  
34.9580369221164 37.2810767789306 27.4352294118391 34.174642681781  
38.745552403895  
LOC642204 38.7537364570873 37.2810767789306 39.3709357615493  
39.9697332660833 37.0526522140242 38.4330755397458 42.357910063876  
43.5544347011646 39.4762546236449 45.9004543328976 43.5710871617107  
39.4490233720848  
LOC642207 45.9090659324223 44.8529259387308 43.7630587657205  
36.3604951341921 37.3508690072156 37.5887129572848 40.2154497375715  
40.931294690669 37.10170285405 45.2556760873335 37.6484782516569  
42.9887069977696  
LOC642210 8144.52133665388 14226.3743910711 12456.731302703  
9488.06491634484 15358.8899487375 13656.2581082905 14226.3743910711  
13656.2581082905 9060.10165509099 8545.48005557056 10235.3288951482  
12125.3293116195  
LOC642212 42.442231667357 40.9731067463382 41.1367478979484  
47.3574589211166 37.6527901109005 39.2248354955045 35.9894133432376  
36.0306975524309 41.074824727477 39.9948390976317 42.357910063876  
41.1554481567603  
LOC642213 39.1590964332473 36.89524015739 41.0356368374708  
43.9282059368202 37.4470183315826 45.1873487463472 41.5817737564592  
40.931294690669 43.2761454096265 41.6373771565199 41.3553369544097  
43.2776458914333  
LOC642214 41.7397731376692 44.0409178714232 43.401782064778  
41.1886975241176 42.7982502551634 42.5660695551615 41.8315602975157  
40.4359177791566 38.6322728994674 46.7646877499666 39.9070785037411  
40.9683275553869  
LOC642216 37.4554876386402 44.5884811528117 37.3687900733549  
45.0798408927912 39.0564222526273 39.6251842352088 40.7910160811527  
42.2577689927563 44.4395580493118 45.1569741609597 39.7342718293432  
41.4508241771315  
LOC642219 38.5007204246293 40.148780650831 37.1643693306382  
40.1804147506786 35.0181575202066 40.1428591998404 37.0564573649223  
45.9604707098953 37.7384958256497 36.1550293353654 44.7114813656401  
36.064718696392  
LOC642220 45.6517320730042 44.4411734611229 41.9666541498638  
50.5310598656998 56.9360840563854 43.9724628401189 42.629412460409  
45.2806199505029 48.3119523820103 42.0621425894624 44.2142581488029  
40.6614700944853

LOC642222 42.2455707947223 39.2907645923217 38.1421709520616  
40.7481155008596 42.7107928951766 41.0582900711341 39.7576136507593  
43.6434576713809 38.3418933808844 36.2435874904689 42.6366765186182  
38.745552403895  
LOC642223 39.266565827316 39.8695929627783 41.9666541498638  
43.6726153508978 41.0885562160946 41.554942319225 37.9430145836712  
38.8495095797881 42.4540072551568 37.920964499903 39.5399188536544  
42.8864415494484  
LOC642228 43.4626049853157 40.148780650831 41.0356368374708  
42.0102671859606 44.3557408297309 46.263826584899 39.8695929627783  
42.8482181313226 44.0519245668737 36.3612409063792 40.2649309204478  
43.0930293831497  
LOC642229 42.6036491382658 48.4980626712175 48.1997158668729  
43.4410741327254 49.5666074434383 53.9517841438975 44.6032218589199  
54.2877981508636 42.4540072551568 42.1622837416589 51.0492389286271  
46.1592873342534  
LOC642231 41.9407041937973 40.148780650831 38.8775560911841  
44.550322123994 38.5512429290626 39.8455060654531 39.3585350448719  
37.0390589468421 37.4540772310118 40.2112371512838 44.2142581488029  
39.2469742642337  
LOC642233 45.6517320730042 53.3094843669564 55.4502804236424  
61.5515639412892 46.3150221024046 50.3245489035833 50.8388984085636  
47.5950227477807 46.3203995372658 45.4614234442527 44.2142581488029  
43.3744503319109  
LOC642236 69.5462764096011 70.3935694362568 63.3819918509711  
81.9218437790485 56.1186281675573 70.6691645786819 81.2673471767743  
66.072769026422 73.7335870746827 63.1490153551677 63.9915902128079  
72.0655217037557  
LOC642237 40.7609952437622 34.2618170189676 42.2577689927563  
39.853175885492 42.6022652963326 44.8872784170036 46.0228732507872  
37.86982638952 42.357910063876 39.4710743516517 38.4689132737495  
43.4709415392696  
LOC642243 43.6706764143908 41.8073910693411 43.3085358214154  
40.7481155008596 41.3755760434934 42.2577689927563 39.6535880152834  
37.7612949798895 39.5806465938526 41.3321861371202 39.6403089864678  
40.5703581862752  
LOC642244 45.2875173643252 38.8336427948187 45.989212296035  
40.0698728584484 39.5595233162192 36.1190722948669 40.9157352260901  
40.5158867964016 36.8127605061228 43.4885245598939 47.1477056711335  
48.27609330316  
LOC642245 40.0557788909923 37.7384958256497 38.9790184198145  
32.0298369224145 35.7973685350741 34.8956628705329 36.5352572191451  
37.0390589468421 38.2215591930186 36.5806287103157 34.4716904283753  
36.8690774823319  
LOC642248 43.0001432913058 42.6022652963326 36.769073068743  
35.49696651597 41.2740822675592 44.5544727111028 41.706879587091  
42.357910063876 43.2761454096265 45.6868589181768 44.2925355984056  
42.8864415494484  
LOC642250 1566.12726152736 2405.8635632802 2272.91548405176  
2083.69812106867 1141.25078954012 3776.54943917367 1418.94307844471  
1539.35554229258 1493.20520979227 2077.74475301595 2164.51925341969  
3343.07293372655  
LOC642252 41.6896065884502 40.4772513262052 41.8291484190524  
41.8778873678551 39.3667161654772 39.2248354955045 42.0049836998634



39.853866204927 39.6432403946069 42.247169080251 44.4329005595031  
40.7704587752083  
LOC642255 68.6053766887741 93.3418050966934 64.2848885182563  
60.5460916692799 67.3568864741196 67.1067574196203 70.8835636550472  
52.4485219671976 75.8280474316969 55.1531662914834 63.2684764441521  
49.9433644436637  
LOC642257 39.3709357615493 44.6918600441328 32.2796484885898  
37.1894304543751 41.467005949568 39.0266821712099 42.4939802311136  
41.3506832276112 39.3750969348308 36.6893251782922 40.723990462047  
41.863927676552  
LOC642263 38.7537364570873 39.7835513496873 42.3536549114165  
42.1273928203021 43.4544762830742 42.2577689927563 37.0564573649223  
40.6171774724171 39.0775870687758 40.3235655331796 43.401782064778  
40.4639532172338  
LOC642265 48.4849194706125 38.7344853699576 41.6079958749402  
41.6564075217517 44.5668141895992 38.8336427948187 41.3594868055879  
47.8947595316832 43.8482802038826 44.6918600441328 46.6442692119997  
50.7487159427973  
LOC642267 44.2718517563299 48.1627097465883 49.2595762436995  
41.8778873678551 46.572043843509 40.1930209223556 42.7431359850339  
39.853866204927 44.2142581488029 42.233842834629 41.3945375181463  
41.1554481567603  
LOC642268 41.4508241771315 39.1982470626863 35.7105247506212  
43.1847628331565 42.269054475455 41.7627910693483 41.706879587091  
44.8997235283254 42.4540072551568 39.5637454855233 40.4504608195666  
38.3291713594599  
LOC642269 39.3100256336821 40.3104838541906 43.0602678767669  
40.0698728584484 43.2907292669418 41.6590564937735 42.3194600586894  
40.3691324547049 43.4656637536244 40.3458948319669 43.1931731665131  
46.5650556481721  
LOC642276 35.6111578834671 38.3322849790657 39.8299340037009  
35.9521941716188 35.2163900400329 31.2812535042976 37.7136011474903  
35.0510338774593 40.4997186069494 33.8984830800739 33.4071187618571  
34.806104801006  
LOC642277 38.2083710281545 44.1239711172417 48.1331309338997  
43.5627649099623 41.0885562160946 37.9003288112261 42.2577689927563  
42.0494116081998 39.3750969348308 40.5090849993014 44.8872784170036  
41.0657892043496  
LOC642278 40.7609952437622 39.1982470626863 39.6451483836089  
37.9875302985336 43.4544762830742 38.8336427948187 39.0458123429605  
39.5466975353131 45.5779686360641 43.9450023643394 43.1931731665131  
40.5703581862752  
LOC642280 39.7576136507593 43.2109153553335 42.157627240486  
39.7840818430159 41.6806984441849 39.7394181011603 42.1157692936428  
37.6557714476853 40.4220196471124 43.0919221375514 41.5421429082231  
37.4059035942248  
LOC642282 78.9563955412096 45.2098033805679 54.3959011882073  
42.4061338151892 78.5468300294626 57.5570747859662 48.5361215129944  
58.9676332048764 55.8160649599186 62.58750768974 51.1137916805019  
57.2350830635912  
LOC642287 42.3433931248155 35.8227939208521 45.3974838013476  
44.1483976313959 43.3332476888305 35.2067831864574 39.2533668167483  
40.931294690669 39.0775870687758 39.4710743516517 42.0750889188255  
36.7762265039864

LOC642290 43.6706764143908 41.8073910693411 46.5650556481721  
35.49696651597 38.0598374201407 39.7394181011603 41.3594868055879  
43.844855336215 46.7760357462635 38.6454098044474 37.9230440150891  
48.6037684272115  
LOC642293 38.5007204246293 36.0366673493555 36.2683886571585  
43.4410741327254 37.4470183315826 42.157627240486 40.7910160811527  
36.6452480995946 38.1169703906207 42.3606390470387 38.6662194645633  
31.036133494654  
LOC642295 48.1125722136997 48.6184776976167 47.3861758958576  
48.309866878365 46.9906120932727 43.2805590023412 51.6784647420677  
48.2109175258674 48.2123120250343 47.1785588364488 44.0527419856743  
44.0451487108213  
LOC642299 236.178265404264 375.697071471585 413.82087661958  
98.7535408247698 265.320447667174 101.909225305064 523.863193910096  
270.947794977829 294.006023678979 308.393270347486 322.774093041134  
334.583159766096  
LOC642302 44.7915315085948 39.6995529770239 38.6727842796202  
43.6726153508978 45.3675390992851 41.554942319225 46.4388841354122  
43.4544762830742 46.3203995372658 45.0155543555707 39.153226699662  
41.7575097298927  
LOC642312 45.5758521267508 41.9894412416874 37.6557714476853  
47.481302504066 41.7929491793697 39.2248354955045 46.7100796279384  
38.5457716679071 42.357910063876 42.6793753550854 38.8507804383261  
48.5123041297835  
LOC642313 40.7609952437622 40.6380495994768 41.528370959196  
43.2504382247503 40.7779767565889 37.5887129572848 39.0788811357542  
35.3608605269276 35.0033376705042 41.7932258301997 40.9683275553869  
41.9430737035925  
LOC642316 45.5758521267508 38.0226905622357 49.7350276169552  
45.5869891570251 37.4470183315826 45.3882138838137 42.629412460409  
39.2672712041774 40.3316153483289 37.5343260962758 43.0971787292711  
42.4607795638552  
LOC642321 43.4626049853157 43.1805016690297 47.3861758958576  
40.3180310664156 46.3150221024046 41.6590564937735 43.3262148375525  
54.9919060580109 41.7627910693483 40.4136535208406 45.5707650534259  
38.745552403895  
LOC642325 40.7022020432945 36.6396388746561 39.3709357615493  
39.4569929845912 38.2083710281545 40.1930209223556 39.2780515621926  
38.6088282130727 40.0870341983328 40.5571841955033 42.5426057453993  
46.1592873342534  
LOC642333 140.744765497063 220.597255695837 171.829798001437  
292.667929804781 159.618353114269 331.390452289344 191.426587373391  
281.141138830497 90.0682241853516 265.860397918913 374.662462104111  
313.399524593316  
LOC642334 39.9697332660833 41.5132248356707 47.7737810047679  
39.2336402665402 41.1507980856436 37.842873463785 39.7576136507593  
41.2098211956301 37.5723609429239 35.8304004211528 39.153226699662  
43.3744503319109  
LOC642335 40.5235471987417 40.4772513262052 40.7620472083159  
40.5484717678957 41.2740822675592 38.3000131612011 41.253645578517  
41.7877325563821 41.3468610075772 41.0608773166058 41.4508241771315  
44.6032218589199  
LOC642338 39.7576136507593 41.8848959280916 42.8270038153139  
42.1273928203021 43.6587492470348 40.4359177791566 36.7356360093603

42.9301944191913 43.6670755115848 41.2276963324981 41.9083581529276  
44.4475838947656  
LOC642340 39.4710743516517 38.4330755397458 36.6522278218553  
36.3604951341921 34.4570158133896 36.4986986135769 43.8206425661746  
42.7431359850339 39.4762546236449 35.8304004211528 34.5633623842083  
44.8372404608604  
LOC642341 32.742439449766 37.2810767789306 39.991353369336  
35.2143190355414 38.9496515344837 37.0180934800573 41.8315602975157  
34.806104801006 44.1519466943185 39.0648733099061 41.9908237694988  
42.9887069977696  
LOC642342 46.5549623118323 45.7317208802318 51.223859150798  
56.0794100106654 38.0598374201407 56.2736599756843 45.6042625176633  
51.6660481331154 44.8997235283254 67.0163226819964 50.4740079109854  
52.2832912331043  
LOC642343 43.844855336215 41.8073910693411 40.931294690669  
42.5664883002833 46.5557478175976 39.0266821712099 42.629412460409  
43.9366081640576 43.6670755115848 38.1042454705119 41.6336636285875  
39.5418280570561  
LOC642344 40.148780650831 44.8529259387308 37.7384958256497  
40.8681871019812 40.8873907150245 37.2686490268265 35.3362091871364  
41.0381860307445 41.2870505273664 34.3674468322242 35.5179217192467  
38.6454098044474  
LOC642345 38.5648843914189 40.6380495994768 40.5734458834617  
42.8235313007746 48.0234896130991 44.6524308640784 39.8695929627783  
46.1673159982664 43.7630587657205 40.6022003765153 39.7342718293432  
40.0557788909923  
LOC642347 44.5282181324797 43.5182502375207 48.1997158668729  
51.949834638817 42.3685136297603 44.3648993568405 46.3057385979341  
46.4672637826582 44.0519245668737 47.3791873993182 46.3370338074996  
38.2350720635382  
LOC642348 45.3872406432794 46.29198852834 41.437237454134  
46.1673159982664 39.5595233162192 38.7340969861754 45.223075311113  
42.7431359850339 50.0526763693329 45.4614234442527 41.4508241771315  
47.6040671292013  
LOC642350 41.3387790895716 33.3643994200057 41.528370959196  
37.1894304543751 40.0599807618105 42.357910063876 42.7431359850339  
36.5393857306744 43.7630587657205 37.7315666632629 41.8168470823451  
40.9683275553869  
LOC642351 43.6706764143908 42.8542642792862 41.437237454134  
40.3180310664156 38.745552403895 41.554942319225 43.6753843488695  
44.5029690493211 46.4164127487052 42.1622837416589 40.9157352260901  
43.8575940017119  
LOC642354 41.2424637338424 43.5182502375207 36.769073068743  
42.6913548400127 40.5710637884029 48.0350549043063 38.0598374201407  
35.7973685350741 44.3440839686558 41.0057887014368 37.3687900733549  
37.8490162439785  
LOC642355 29.9775071862804 38.9338521051669 45.2313723727673  
38.6414316877471 41.5668884168669 36.6996187567892 39.5496902678788  
44.293922970134 36.9060997041453 40.7063426028871 39.153226699662  
39.0536056496869  
LOC642356 41.0608773166058 43.1805016690297 44.0451487108213  
37.7469621225553 44.0451487108213 37.0180934800573 35.3362091871364  
42.4580504587581 42.1594905198929 40.1179210534118 39.2542963855807  
38.6454098044474

LOC642359 38.304249186058 42.6022652963326 39.8299340037009  
40.646702696033 35.5220586859301 43.0860383229288 40.4359177791566  
45.8669209716694 42.6366765186182 38.745552403895 42.357910063876  
40.6614700944853  
LOC642360 41.4508241771315 40.2493681589104 38.7745734037492  
43.1847628331565 33.7494761745342 40.244271403831 42.9803717121865  
39.4710743516517 38.4344387289956 40.4136535208406 40.723990462047  
33.3192849177028  
LOC642361 55.3153799233744 66.2154717217675 54.5191471810265  
52.1201052574162 57.9903227926667 79.6895408438974 63.1604223919703  
52.3565394429739 75.0310858627394 53.8716214229685 60.7770994863828  
58.5946363700203  
LOC642362 59.987045425047 44.0409178714232 43.4709415392696  
44.0860067869564 40.4639532172338 40.650742261428 43.4933087941017  
43.0390857698452 39.0470836345045 41.6373771565199 40.7670908011804  
41.2870505273664  
LOC642365 43.1805016690297 44.4411734611229 39.0775870687758  
44.7980740332174 42.4864576619427 41.8613406887824 42.629412460409  
44.293922970134 41.7627910693483 43.0919221375514 39.3667161654772  
43.8575940017119  
LOC642366 38.7537364570873 43.2649781354792 46.1653991089885  
37.1894304543751 42.1650127805175 42.750861693377 39.4600924554505  
40.6171774724171 40.6957787921451 37.5343260962758 39.5399188536544  
40.2669497398702  
LOC642369 46.8141313516997 49.6203214143464 50.3950981988762  
45.4634652319753 54.1225249245036 45.7300501624017 40.6750540874299  
44.1311654985682 42.5406888281114 46.6598879466655 52.104880481326  
47.0130468198828  
LOC642370 40.2543341073001 35.9305494063137 38.9790184198145  
37.9875302985336 42.9090346219023 47.4699236780425 34.9344532055397  
38.745552403895 41.5635499110307 42.4594149893798 39.9070785037411  
43.2776458914333  
LOC642372 41.7397731376692 38.5252456306656 42.0621425894624  
42.9358255168086 33.4316681623175 37.8102105794655 37.4772922422734  
36.0306975524309 37.4540772310118 44.4652605017595 40.3452320167286  
40.2669497398702  
LOC642373 44.436995101921 43.5182502375207 43.1931731665131  
43.5627649099623 44.147557390293 36.9060997041453 39.6535880152834  
53.2046867327331 43.0930293831497 56.057906531592 45.7328341667151  
45.9693232070002  
LOC642374 38.5007204246293 45.6533175604486 41.528370959196  
51.5913529948887 49.5666074434383 44.0804700754786 35.6056062164318  
50.5070012045444 39.5806465938526 46.325232414659 43.0971787292711  
41.3481355128089  
LOC642377 52.0299937917925 46.1569135229922 55.4502804236424  
51.0175677516029 58.037539503209 41.2567470068038 43.8206425661746  
49.2019743609873 42.4540072551568 44.2580151149956 41.6336636285875  
44.8372404608604  
LOC642380 44.436995101921 46.7591817286632 38.5045333213784  
40.0698728584484 46.1804647841331 39.7394181011603 44.9863726205428  
44.293922970134 44.4395580493118 48.2596564318071 42.4580504587581  
46.917149434588  
LOC642381 43.5710871617107 41.9894412416874 43.7630587657205  
48.1662933382789 42.269054475455 39.7394181011603 39.5496902678788

44.2159020605784 42.0621425894624 45.0155543555707 46.4205654140754  
44.1452943804044  
LOC642383 41.6354649482853 33.8237407699472 36.3604951341921  
40.7481155008596 32.8704945047196 38.5252456306656 36.197424053556  
35.9023742468744 35.6139301508335 36.3612409063792 37.0180934800573  
38.0452862258803  
LOC642384 46.7293238583888 48.9899488302637 42.3536549114165  
45.8844325913247 44.7829632472754 49.5424425850549 46.5650556481721  
43.3262148375525 50.5785738734431 47.611018474151 42.6366765186182  
51.138877923954  
LOC642387 42.8036731479932 39.2907645923217 42.157627240486  
39.9697332660833 41.9842695818285 43.5752393599169 36.7356360093603  
37.9837233601316 41.4636047919453 39.7835513496873 45.4799270968969  
37.1747156131306  
LOC642393 44.9370339275041 47.2770121962655 53.7792717770978  
46.3203995372658 67.7155610106537 49.8135461150818 46.0228732507872  
47.4439407315335 47.0055981216687 49.7728344236992 55.2374601141719  
52.5752569429057  
LOC642397 43.7585538437696 42.0418171513817 39.5147641390234  
39.2459792718908 42.6022652963326 38.8603695827799 39.4859911554583  
41.9315419791594 41.1367478979484 42.6211340086915 41.400731343457  
40.5703581862752  
LOC642398 41.4508241771315 49.0931904486294 48.6574544556862  
43.9282059368202 46.567903751033 43.6960408897486 42.106632087165  
42.381482941987 47.3295685064937 44.6360645306497 46.3370338074996  
47.1726589980324  
LOC642399 45.8108990837624 46.0023068797812 45.989212296035  
39.853175885492 43.6587492470348 45.0882356578404 41.4742337714895  
53.3094843669564 46.2027193115397 44.3648993568405 42.911855821602  
45.6692241948108  
LOC642403 48.0201377454632 45.3486182278177 44.5134109184888  
51.223859150798 50.6470461863549 43.6670755115848 50.5252048155459  
43.6434576713809 48.7358147030082 38.528621456378 42.0750889188255  
49.5539622682049  
LOC642405 44.8914371498528 46.8954576545929 45.5883690965192  
40.4359177791566 45.6895223823001 43.8582747295766 35.6056062164318  
34.5886782974123 42.357910063876 44.8997235283254 37.6484782516569  
43.1805016690297  
LOC642408 37.1485601150873 43.5182502375207 41.9666541498638  
39.853175885492 37.7576900881741 37.3799542961839 40.7910160811527  
41.9315419791594 35.3227485563945 43.1839109702714 39.7342718293432  
43.3744503319109  
LOC642411 44.1294459089314 43.1805016690297 44.696023817801  
43.8002456102021 43.844855336215 43.8582747295766 41.9393838138203  
38.6454098044474 40.4997186069494 41.4397539024976 40.0766543123257  
38.3291713594599  
LOC642412 157.356512456687 60.6548851977964 54.9071823326024  
88.5511408870489 64.7488184936482 106.951862149262 48.3411413510851  
63.1604223919703 44.0519245668737 88.9738853594498 85.8277891453447  
69.8505620106065  
LOC642414 41.8409927585705 35.5310164682026 39.991353369336  
42.2496337895968 39.2608760193011 42.750861693377 36.7356360093603  
38.1835938174625 43.8482802038826 39.8873706855774 37.9946685306274  
37.0953622406687

LOC642418 43.3638918705225 39.8695929627783 35.3649449469275  
41.7614975630362 39.7568367479301 40.040778349137 44.6032218589199  
41.2551966132486 37.7384958256497 42.3606390470387 40.4504608195666  
44.4475838947656

LOC642419 40.148780650831 44.5884811528117 42.7303139017786  
42.357910063876 43.5544347011646 37.9003288112261 35.6056062164318  
36.2539950294089 41.1742244762318 45.9004543328976 45.6348103033479  
44.0451487108213

LOC642420 33.8558232866797 44.7829632472754 42.2577689927563  
44.4367387274922 44.2607789091176 44.55447271111028 39.7576136507593  
40.2382908228517 41.5635499110307 44.8997235283254 43.7585538437696  
41.4508241771315

LOC642423 44.1294459089314 45.3486182278177 42.2577689927563  
40.646702696033 56.9360840563854 43.5752393599169 48.1747307200218  
48.6441988290952 47.3791873993182 42.785429206422 36.8282383070068  
44.6484005362281

LOC642424 41.6354649482853 43.1805016690297 41.9666541498638  
43.074472921841 41.9842695818285 42.9695585740813 43.0930293831497  
39.9576138799997 42.4540072551568 40.4136535208406 43.1931731665131  
40.0557788909923

LOC642425 43.9309845324767 39.6995529770239 40.4070046183108  
35.0448343468967 35.3327761997046 34.5886782974123 43.6753843488695  
42.357910063876 38.1169703906207 43.2988017098387 39.0550139257658  
36.8690774823319

LOC642426 40.8681871019812 40.6380495994768 45.6989664108554  
42.8235313007746 43.004943518025 40.1428591998404 40.5585676679482  
42.0494116081998 42.1594905198929 42.5664883002833 43.4709415392696  
36.7762265039864

LOC642428 45.3872406432794 39.5050383901884 45.8844325913247  
45.0798408927912 42.0709558258414 45.2852528185486 39.4600924554505  
47.5950227477807 43.8482802038826 48.7414853386615 41.7272875295469  
43.3744503319109

LOC642432 37.1485601150873 47.9665737016961 43.7630587657205  
37.651298468202 46.3150221024046 44.2607789091176 44.8643898647322  
46.0633179231318 42.6366765186182 47.8207974930031 44.1148826235374  
44.0451487108213

LOC642433 52.5792653122861 42.5269793679335 42.7303139017786  
46.1673159982664 46.0043807840705 40.040778349137 41.253645578517  
50.3082459161777 48.3954967265007 46.6598879466655 40.9157352260901  
38.745552403895

LOC642434 46.3390850717989 42.8542642792862 44.9758339877851  
45.1944222548351 42.7982502551634 41.6590564937735 44.2166118829877  
45.5581356216957 41.1742244762318 41.8613406887824 44.4688999098904  
44.1452943804044

LOC642439 45.5758521267508 47.3536182445315 45.7968648044613  
50.0526763693329 52.9433495155796 46.7800033479223 48.8319884367456  
43.7396619462033 37.10170285405 46.1390887492649 45.390192977585  
42.357910063876

LOC642443 43.844855336215 49.0697565324841 38.3166554965434  
43.1847628331565 43.7517118200398 40.3357777530419 41.253645578517  
40.5158867964016 48.3119523820103 45.1569741609597 44.4688999098904  
46.917149434588

LOC642447 48.5835484742456 44.4411734611229 44.4311655729487  
44.265834798964 42.269054475455 45.0882356578404 52.0942589368478

40.4359177791566 45.3756389170606 41.5435611403119 43.9450023643394  
44.8372404608604  
LOC642449 37.6397652536077 39.2907645923217 42.640829914102  
39.066284740632 38.6454098044474 37.1317006162938 39.6535880152834  
40.047314525032 48.1174861108648 35.7202909649682 35.1470994647364  
33.2382077236252  
LOC642450 39.7576136507593 36.3110701990588 45.4865173433646  
40.4359177791566 43.9450023643394 40.4359177791566 51.5967098638347  
41.4508241771315 41.3803269429468 42.3606390470387 44.6286581923295  
39.6352613956998  
LOC642451 41.6354649482853 43.0971787292711 40.931294690669  
40.8681871019812 41.2740822675592 44.5544727111028 35.0305278582179  
37.33030683349 37.6383530120621 41.7405682794166 41.6336636285875  
33.6902293666089  
LOC642452 43.0001432913058 42.5269793679335 44.4311655729487  
49.3654837541353 46.1804647841331 47.3791873993182 47.2927436772465  
47.2009420656854 47.5564423692142 42.2614524730856 43.844855336215  
47.0130468198828  
LOC642453 44.6231541342 43.0227387991135 41.0356368374708  
39.066284740632 44.2607789091176 43.3785777889265 42.7431359850339  
40.4359177791566 38.6322728994674 40.8049408996274 44.8872784170036  
41.863927676552  
LOC642456 48.1952521496489 46.0023068797812 45.6989664108554  
38.2041059863839 43.2484996523549 40.244271403831 37.6036146841933  
42.357910063876 41.2870505273664 46.441301934328 42.6366765186182  
46.6397391251762  
LOC642460 39.266565827316 36.6002100641539 38.6727842796202  
39.2780515621926 39.0564222526273 44.6524308640784 39.8695929627783  
38.2782436497441 37.7384958256497 41.6373771565199 35.9563099719284  
40.9683275553869  
LOC642464 43.1805016690297 43.2649781354792 45.5883690965192  
47.481302504066 46.4343327861696 44.2607789091176 44.2166118829877  
44.5029690493211 43.2761454096265 41.5435611403119 39.9070785037411  
43.0930293831497  
LOC642468 45.8108990837624 47.2770121962655 46.1987217359283  
43.367124590178 46.4732328055735 42.9695585740813 41.4369824439795  
44.4475838947656 41.8197029429821 43.4544762830742 41.6657053704762  
42.934549734195  
LOC642471 40.148780650831 40.6380495994768 41.9666541498638  
47.2009420656854 43.9450023643394 43.0860383229288 47.7390230243778  
31.8228237796461 39.4762546236449 36.0481934423077 44.6286581923295  
41.9430737035925  
LOC642473 44.436995101921 38.9338521051669 36.769073068743  
37.29566077996 47.4548471240051 38.7340969861754 43.6753843488695  
41.1575777497576 40.8970401536578 43.401782064778 42.911855821602  
44.4475838947656  
LOC642475 41.7397731376692 32.6416008433981 37.0642268327439  
37.1894304543751 35.7973685350741 37.0180934800573 46.1634822993009  
37.0390589468421 38.1169703906207 39.9948390976317 42.357910063876  
37.2810767789306  
LOC642477 58.0139597055449 55.0897019602305 75.7464604972652  
41.0726336841311 130.936053902005 45.4882438975269 41.5817737564592  
51.9447450229707 59.8158518516035 36.6893251782922 39.8184668132023  
43.8575940017119

LOC642480 35.1307934330047 35.3307157989724 37.8386378737561  
29.9775071862804 43.004943518025 41.554942319225 41.253645578517  
40.5158867964016 37.7384958256497 38.8507804383261 45.5707650534259  
43.4709415392696  
LOC642486 48.3814421939888 44.6918600441328 42.157627240486  
43.3078542962968 46.3150221024046 41.3553369544097 45.8980298854198  
43.2551508830106 47.0804681460898 45.2556760873335 45.310660704531  
45.4799270968969  
LOC642489 352.132645260048 423.254211470935 512.255695437272  
428.958127252533 638.305455110267 435.094968715663 380.278389209918  
387.631477822638 247.193935816149 351.700618429121 401.679080975109  
489.983164420779  
LOC642490 41.7397731376692 35.4484652445078 42.5406888281114  
41.1886975241176 38.0598374201407 46.3715909653832 37.6036146841933  
38.745552403895 44.3440839686558 38.3092241935352 38.956280281655  
40.2669497398702  
LOC642497 40.7609952437622 39.7835513496873 43.7630587657205  
46.3203995372658 40.7779767565889 41.8613406887824 43.8206425661746  
44.0390019242862 39.853866204927 42.0621425894624 38.2795150354677  
46.2625470410195  
LOC642502 52.5792653122861 68.6074516459969 77.2048580540589  
42.1273928203021 70.7760293129408 56.7429967489965 62.3556396662215  
47.9942520395434 158.769954040462 53.8260140375214 48.2910530887214  
62.2025996860055  
LOC642503 41.9407041937973 42.5269793679335 41.785676764591  
27.4352294118391 43.3332476888305 38.3418933808844 39.0458123429605  
36.0306975524309 44.619512785899 43.2988017098387 42.170702295259  
44.6484005362281  
LOC642504 33.6902293666089 38.7344853699576 37.5597671487621  
37.1894304543751 38.3561682218911 42.4580504587581 37.1643693306382  
39.7509165247419 36.6312676076142 35.7202909649682 42.5426057453993  
39.0536056496869  
LOC642505 42.9104454767916 39.3999056968598 45.989212296035  
46.1673159982664 45.3675390992851 51.294537308199 51.3064929551674  
41.9315419791594 43.6670755115848 44.4652605017595 40.2649309204478  
50.0571060701893  
LOC642506 38.385865183581 42.6939394537076 40.6737160001291  
36.3604951341921 40.5710637884029 40.040778349137 39.8695929627783  
36.7460922671619 39.4762546236449 41.7405682794166 39.6403089864678  
41.4508241771315  
LOC642509 40.9558083259517 41.0678614026819 42.3536549114165  
46.7577982595088 46.0977687311222 42.750861693377 43.3262148375525  
35.6825474397235 42.9020321355927 40.2112371512838 44.3763859390287  
43.9541718254769  
LOC642514 41.0608773166058 45.0905928998779 37.8386378737561  
43.3078542962968 43.6587492470348 38.3418933808844 41.8315602975157  
43.2551508830106 40.3316153483289 39.6719190054379 42.0750889188255  
39.5418280570561  
LOC642515 41.7397731376692 41.9894412416874 39.0775870687758  
46.0228732507872 46.1804647841331 36.1190722948669 41.1507980856436  
35.5798430594271 39.4762546236449 39.9948390976317 38.4689132737495  
39.1553169409075  
LOC642516 44.5282181324797 38.9338521051669 43.6670755115848  
38.745552403895 41.3755760434934 40.1428591998404 38.6243997507646



40.7311497914871 37.8319142847141 33.7883338848419 41.2598458726002  
36.9976231206067  
LOC642520 44.2350046179299 45.0115870036541 50.0748292497578  
45.7397504535169 41.8806343997257 45.8325181856483 38.7337086062875  
41.6466169548846 46.0106098064475 42.3606390470387 42.2618615571566  
41.7575097298927  
LOC642521 40.6559419616644 34.2618170189676 38.7745734037492  
41.3027031037343 39.2608760193011 44.5544727111028 41.3594868055879  
39.3709357615493 41.1742244762318 34.9138625012006 42.0750889188255  
34.3409660445447  
LOC642527 40.4639532172338 41.2598458726002 40.931294690669  
37.9875302985336 37.7576900881741 41.3553369544097 43.6753843488695  
41.2551966132486 44.7058233759912 36.8059561571675 39.3667161654772  
42.6758568421347  
LOC642528 37.0320432433314 33.4316681623175 45.310660704531  
43.8002456102021 49.8304479381623 41.159706131351 45.8980298854198  
38.4540849632254 44.8997235283254 43.6033221838149 40.2649309204478  
41.1554481567603  
LOC642530 44.5282181324797 39.8695929627783 44.0451487108213  
48.9944486068347 38.2496050953547 40.8634043028528 43.8206425661746  
39.1652965788406 47.4699236780425 41.7405682794166 43.0016969050339  
47.1060577218993  
LOC642536 36.8072833828297 38.9338521051669 37.5597671487621  
45.4634652319753 40.3452320167286 42.8598805316863 35.3362091871364  
39.9576138799997 38.9834959368496 38.2069499294002 36.43924066428  
38.745552403895  
LOC642537 38.8561375693335 40.716553247236 39.4710743516517  
43.8002456102021 43.004943518025 40.5281496800812 41.1507980856436  
41.2551966132486 45.1899271235974 45.6868589181768 47.0110068985119  
45.0035308952466  
LOC642538 39.8662795144616 40.9731067463382 40.4070046183108  
46.1673159982664 45.1137938810047 40.244271403831 49.1067959632109  
44.7044140979108 40.5912213523345 47.1001757441025 42.6366765186182  
39.2469742642337  
LOC642539 39.0620487644635 41.3610369241157 46.0727230219512  
47.9915414951747 48.8381507187986 41.6590564937735 42.9803717121865  
47.4740726032707 40.4997186069494 42.3606390470387 39.9899430628542  
42.57175366709  
LOC642548 41.2424637338424 46.8236022402545 39.9101908547397  
39.2780515621926 45.4751076037511 53.3185097662527 47.1345949868029  
45.642304356051 50.1603795873336 38.1042454705119 46.0095710163378  
46.2625470410195  
LOC642553 46.8141313516997 42.3550738181144 43.9450023643394  
45.8844325913247 47.4548471240051 49.4157684139858 45.223075311113  
38.4540849632254 43.8482802038826 46.2286164776607 42.4580504587581  
43.3744503319109  
LOC642558 40.3478825593224 43.0782257865587 39.991353369336  
42.0621425894624 45.9725715538987 46.263826584899 39.5496902678788  
39.6474008369935 39.8873706855774 40.6022003765153 42.2618615571566  
44.7401523707775  
LOC642559 51.0225132036905 63.0670482657086 78.9701459806641  
47.0874209746031 98.1220820761255 52.0299937917925 154.509548705054  
69.3468840908665 52.2631308081333 95.8075612515186 88.4594321382477  
84.5354986509039

LOC642561 37.1485601150873 39.1982470626863 41.2365089689635  
41.4273122914951 43.1252272136667 46.6872654833579 43.5627649099623  
37.5511560880902 44.8003345643334 41.6373771565199 45.1432412071268  
39.9519547348106  
LOC642563 46.3390850717989 42.9358255168086 45.310660704531  
39.1706564265495 43.3332476888305 44.8872784170036 45.4799270968969  
42.7431359850339 47.4699236780425 43.4885245598939 37.9946685306274  
44.4475838947656  
LOC642564 42.8036731479932 42.4493032770053 40.5734458834617  
43.5627649099623 46.4343327861696 39.8455060654531 42.9803717121865  
39.6474008369935 42.5406888281114 36.0481934423077 41.3553369544097  
44.4475838947656  
LOC642566 36.9060997041453 41.554942319225 36.0306975524309  
40.7481155008596 41.467005949568 43.2805590023412 35.9894133432376  
40.831207953647 41.5635499110307 38.4187686307607 38.079222289614  
45.0985088502363  
LOC642568 37.3463875295726 39.8695929627783 41.437237454134  
37.4223289687135 35.9894133432376 39.6251842352088 39.7576136507593  
35.5798430594271 35.2143190355414 36.2435874904689 38.8507804383261  
35.4484652445078  
LOC642570 46.0023068797812 45.6533175604486 54.842638106265  
42.5664883002833 48.6224651100733 41.554942319225 41.706879587091  
45.3872406432794 41.9635525160083 43.7303813515864 47.0940613507321  
45.3763275588341  
LOC642571 38.957687788868 43.683792219729 48.6037684272115  
44.7980740332174 41.8806343997257 44.1737502492846 48.8319884367456  
46.5717043290731 40.4997186069494 42.8936990772838 39.5399188536544  
42.4607795638552  
LOC642573 43.1805016690297 42.9358255168086 40.1985790927248  
38.3166554965434 45.8051846088552 50.4022543872993 56.9320717885002  
46.3685439301234 50.1603795873336 45.7911932481722 45.6348103033479  
42.6758568421347  
LOC642574 40.6559419616644 41.0678614026819 47.0940613507321  
36.7892997857376 41.5668884168669 40.244271403831 35.3362091871364  
33.7818132446042 44.8003345643334 44.2580151149956 45.7328341667151  
41.863927676552  
LOC642576 42.7150227340364 34.8137085420423 44.696023817801  
44.6905691366696 38.4540849632254 47.4699236780425 47.8947595316832  
47.4740726032707 44.8997235283254 44.7958122466628 44.2142581488029  
38.4330755397458  
LOC642578 37.55264801907 41.554942319225 37.8386378737561  
39.853175885492 37.3508690072156 34.9849896310235 40.7910160811527  
36.8400213077707 40.5912213523345 39.1621898366355 40.547835538778  
44.6484005362281  
LOC642580 38.7537364570873 39.3999056968598 41.2365089689635  
44.550322123994 38.1644569189523 38.9378717994178 36.634024014558  
39.1652965788406 40.137818555383 39.2623423164488 41.3553369544097  
37.9607839934735  
LOC642583 44.436995101921 36.9994058279362 36.9795961564828  
38.4208429103799 38.9496515344837 44.6524308640784 41.706879587091  
38.956280281655 35.1155486926999 41.1222709786153 39.5399188536544  
32.0636251428594  
LOC642587 37.3463875295726 39.5050383901884 38.0452862258803  
37.9875302985336 36.8059561571675 36.0306975524309 36.7356360093603

38.745552403895 40.5912213523345 36.9102644736882 41.8168470823451  
35.7451401627836  
LOC642588 38.1169703906207 37.920964499903 49.1067959632109  
39.066284740632 41.8806343997257 38.6414316877471 39.8695929627783  
40.3357777530419 42.4540072551568 42.785429206422 41.1638563416981  
38.4330755397458  
LOC642591 41.0608773166058 42.5269793679335 47.5673419710251  
43.074472921841 43.2484996523549 37.1317006162938 41.1507980856436  
48.3590401011623 42.0621425894624 41.1222709786153 46.0095710163378  
36.449101775775  
LOC642592 39.8662795144616 38.0226905622357 36.1042012504758  
41.6564075217517 37.0526522140242 42.0574848021044 38.5066108855005  
38.2782436497441 42.4540072551568 37.3179578037963 34.7308008643142  
40.8681871019812  
LOC642594 44.5282181324797 34.8137085420423 39.7411455670172  
40.1804147506786 41.1868052124344 36.6996187567892 35.4623691645629  
41.9315419791594 36.7267557061938 39.5637454855233 46.1673159982664  
37.5556299264699  
LOC642595 41.7397731376692 39.9697332660833 38.0452862258803  
38.8495095797881 40.3452320167286 34.7983399096627 39.0458123429605  
35.3608605269276 37.5469247328848 39.2623423164488 39.2542963855807  
34.0382693188794  
LOC642597 37.3463875295726 35.5971175693139 39.5450079747895  
37.5764485234171 36.131485826118 36.6996187567892 33.5031722658993  
37.4937394063612 35.5220586859301 34.2100646534001 36.8282383070068  
36.6271061451613  
LOC642602 44.5282181324797 46.8236022402545 40.4070046183108  
47.6687908290818 44.147557390293 46.4648868771662 42.8684958525042  
40.3357777530419 44.3440839686558 40.3235655331796 41.1638563416981  
43.7672102682067  
LOC642606 41.8409927585705 40.9731067463382 37.3687900733549  
43.5627649099623 47.3172462673426 43.0860383229288 40.0052661202207  
43.2551508830106 41.4636047919453 45.6868589181768 41.6336636285875  
44.2527566343661  
LOC642607 38.5007204246293 39.3999056968598 46.0727230219512  
39.853175885492 45.6895223823001 42.0574848021044 44.6032218589199  
39.3709357615493 44.0519245668737 38.2069499294002 48.8744644207821  
39.7411455670172  
LOC642608 39.7576136507593 42.1607322031054 42.0621425894624  
43.9282059368202 39.859345745831 43.1826328292558 43.3262148375525  
46.4672637826582 42.5406888281114 41.5435611403119 43.0971787292711  
40.6614700944853  
LOC642611 42.442231667357 39.9697332660833 44.1452943804044  
40.7481155008596 46.1804647841331 39.4953494583071 41.0381860307445  
46.1673159982664 40.5912213523345 39.8873706855774 43.1931731665131  
39.9519547348106  
LOC642615 46.441301934328 46.1569135229922 40.6737160001291  
40.7481155008596 50.2163892855092 41.9543948167375 41.1507980856436  
45.4757965005055 43.1805016690297 33.7883338848419 42.4580504587581  
43.4709415392696  
LOC642616 37.1485601150873 45.8669209716694 45.4865173433646  
44.1483976313959 40.3452320167286 47.7556758818053 44.3440839686558  
44.7044140979108 42.0621425894624 50.0564735608363 46.1673159982664  
49.8253396161069

LOC642620 32.821392987958 36.6002100641539 36.6522278218553  
38.745552403895 35.7973685350741 33.5578650644246 35.9894133432376  
31.7063377004409 35.3227485563945 33.6188027862739 32.8881500803623  
38.8495095797881

LOC642621 45.4799270968969 47.4740726032707 43.1931731665131  
44.4367387274922 50.6470461863549 39.4953494583071 46.3057385979341  
42.0494116081998 41.2870505273664 44.0409178714232 43.0016969050339  
44.6484005362281

LOC642622 38.6454098044474 42.6939394537076 42.8270038153139  
40.7481155008596 39.9697332660833 41.6590564937735 39.6535880152834  
44.0390019242862 41.5635499110307 50.22432299342 34.266241549578  
39.8497227447888

LOC642624 35.4287975493553 39.2907645923217 42.157627240486  
40.646702696033 39.1650142708257 34.0777108441756 40.5585676679482  
36.5393857306744 37.7384958256497 34.7308008643142 41.8168470823451  
42.4607795638552

LOC642626 40.5654775358427 42.8542642792862 45.6989664108554  
42.2496337895968 39.3667161654772 41.2567470068038 45.4799270968969  
45.2806199505029 44.2607789091176 40.8970401536578 42.7275315121163  
44.4475838947656

LOC642628 40.9558083259517 42.0709558258414 40.7620472083159  
35.6928955245309 32.6463318577756 37.8102105794655 36.8369172900902  
37.7612949798895 35.1155486926999 40.6022003765153 35.9563099719284  
39.4490233720848

LOC642629 39.3709357615493 40.6380495994768 32.2133093774284  
44.6905691366696 41.1868052124344 40.650742261428 38.6243997507646  
43.0390857698452 36.197424053556 35.3849221682845 40.6373400186325  
37.4554876386402

LOC642633 39.266565827316 37.6383530120621 43.1931731665131  
43.6726153508978 44.8897737954573 46.4648868771662 41.253645578517  
46.0633179231318 44.5303781239209 49.5265949137207 45.5707650534259  
42.0424641526302

LOC642637 40.5654775358427 38.2263227947189 42.2577689927563  
45.8844325913247 43.9450023643394 37.9003288112261 42.0605906240248  
42.6450179841129 38.4344387289956 37.2089297656361 39.2542963855807  
43.0930293831497

LOC642639 37.0320432433314 40.3384318592985 33.8558232866797  
36.0481934423077 36.2048942610546 34.1806289878747 38.6243997507646  
38.8495095797881 38.3418933808844 41.0057887014368 34.9428206949566  
38.4330755397458

LOC642644 38.0089018744739 43.1805016690297 38.3166554965434  
36.7892997857376 42.3685136297603 43.0860383229288 43.1931731665131  
41.3506832276112 38.0213051227859 37.0320432433314 40.6373400186325  
30.2139683801331

LOC642645 34.5886782974123 35.9305494063137 40.8420925848403  
43.1847628331565 36.5393857306744 40.5281496800812 44.8643898647322  
37.2237132058632 35.9645119596869 40.3235655331796 39.7342718293432  
36.7762265039864

LOC642646 35.4287975493553 37.5469247328848 45.4865173433646  
37.4223289687135 45.6895223823001 42.8598805316863 41.706879587091  
40.4359177791566 41.6616444147804 44.0409178714232 40.9157352260901  
40.0557788909923

LOC642648 44.2350046179299 45.4143854024453 43.4709415392696  
43.3078542962968 50.6470461863549 41.554942319225 43.0930293831497

43.6434576713809 40.8970401536578 46.1390887492649 44.7926323492519  
46.1592873342534  
LOC642650 41.8409927585705 40.148780650831 36.4564050256915  
40.646702696033 45.8051846088552 42.0574848021044 39.7576136507593  
39.853866204927 45.7452456977857 40.5090849993014 44.4688999098904  
39.3575468494941  
LOC642653 48.8941062980393 41.8073910693411 41.0356368374708  
40.3180310664156 35.2163900400329 40.8634043028528 40.4359177791566  
44.5029690493211 42.0621425894624 39.5637454855233 35.5179217192467  
48.9733758107788  
LOC642655 41.8409927585705 33.6902293666089 42.3536549114165  
40.7481155008596 40.2449343247539 40.040778349137 45.223075311113  
43.844855336215 41.863927676552 42.3606390470387 43.0016969050339  
35.2448979801094  
LOC642656 43.0930293831497 45.1694246393676 41.785676764591  
36.9912468186322 49.5666074434383 46.4648868771662 45.1017494688414  
41.7419877611072 46.4164127487052 42.4594149893798 42.5426057453993  
41.863927676552  
LOC642659 43.3638918705225 44.6918600441328 43.6670755115848  
43.6726153508978 53.3086645804786 44.1737502492846 50.0088611244948  
44.8997235283254 42.992884918158 44.2580151149956 43.4709415392696  
40.8681871019812  
LOC642660 43.6706764143908 44.2105195734073 41.0356368374708  
42.8235313007746 44.7829632472754 38.6414316877471 40.5585676679482  
37.0390589468421 40.137818555383 43.6033221838149 40.0766543123257  
39.1553169409075  
LOC642662 39.9697332660833 40.8880530359822 44.3344900481112  
46.1673159982664 40.8873907150245 41.7627910693483 48.0283573444179  
43.844855336215 44.5303781239209 43.7303813515864 41.5421429082231  
39.9519547348106  
LOC642666 39.5676051939342 38.3322849790657 39.6451483836089  
48.1662933382789 40.8873907150245 41.8613406887824 38.1793598983615  
39.1652965788406 38.4344387289956 40.1179210534118 38.1835938174625  
39.1553169409075  
LOC642669 45.0985088502363 42.6939394537076 43.1931731665131  
46.0228732507872 35.5220586859301 39.7394181011603 42.8684958525042  
40.047314525032 41.4636047919453 51.2318935933116 43.0016969050339  
44.7401523707775  
LOC642671 44.436995101921 40.9731067463382 42.640829914102  
43.6726153508978 42.0709558258414 37.4782441311626 43.0930293831497  
41.7419877611072 45.3756389170606 39.2623423164488 40.723990462047  
36.6603338274678  
LOC642672 45.4799270968969 43.0227387991135 47.0055981216687  
46.7577982595088 39.3667161654772 36.2768299545794 50.0088611244948  
44.7044140979108 42.1594905198929 50.4234835272833 47.4630625313159  
44.7401523707775  
LOC642673 42.6036491382658 44.2630383225933 44.8872784170036  
45.5869891570251 45.8051846088552 43.8582747295766 41.253645578517  
42.5435283762933 46.0106098064475 44.1379638573455 44.8872784170036  
42.6758568421347  
LOC642675 36.0144420013819 30.9403229851671 34.1806289878747  
35.49696651597 38.3561682218911 38.9378717994178 33.9750800030909  
32.6039814489621 37.3600014814388 36.0481934423077 38.4689132737495  
37.6557714476853

LOC642677 37.8386378737561 42.9358255168086 46.2625470410195  
38.5252456306656 40.6723334103791 42.0574848021044 34.9344532055397  
37.33030683349 44.8003345643334 44.6918600441328 42.7275315121163  
37.3600014814388  
LOC642678 50.379587451669 49.0697565324841 47.9035532886869  
74.6159297822533 42.7107928951766 51.0506441018166 42.2577689927563  
48.272324215504 47.3791873993182 46.0119912782855 53.7475011049549  
58.112348043634  
LOC642680 37.8386378737561 43.1805016690297 37.3687900733549  
39.3750969348308 38.8456942580061 31.7413650507468 41.9393838138203  
37.7612949798895 37.7384958256497 36.0481934423077 42.0750889188255  
43.0930293831497  
LOC642681 38.8561375693335 35.3307157989724 46.2625470410195  
43.4410741327254 41.6806984441849 42.357910063876 43.1931731665131  
37.33030683349 44.619512785899 37.8217989841918 39.5399188536544  
45.3763275588341  
LOC642684 43.5710871617107 44.5152708955623 52.0742951366864  
54.2886483704949 49.5666074434383 47.5733603903505 49.1067959632109  
41.0381860307445 46.8873421271259 46.2286164776607 39.3667161654772  
49.2064066614865  
LOC642685 42.9104454767916 39.7835513496873 41.9666541498638  
42.5664883002833 33.8558232866797 41.2567470068038 39.4600924554505  
35.6825474397235 34.8552366193358 42.1622837416589 40.2649309204478  
38.3291713594599  
LOC642688 37.55264801907 39.2907645923217 42.5406888281114  
40.1804147506786 36.2048942610546 35.7034203372528 43.5627649099623  
33.0038344711883 39.9444191873552 38.957687788868 37.2892641289258  
38.8495095797881  
LOC642691 49.4151347850687 47.2055133646385 51.7138050344355  
54.6089451252049 44.147557390293 51.0506441018166 41.5817737564592  
46.1673159982664 47.4699236780425 45.5776159432079 46.0905079010237  
53.7442594289333  
LOC642692 44.5282181324797 45.7979032939211 46.9040704638073  
48.4916117779992 50.5110359971301 43.6670755115848 53.7423898357583  
43.5544347011646 52.0583273941813 44.7958122466628 45.390192977585  
47.0130468198828  
LOC642693 37.4554876386402 40.4359177791566 37.3687900733549  
32.2212308728305 42.6022652963326 38.6414316877471 37.3799542961839  
43.1567024035183 39.853866204927 37.4302011516587 38.8507804383261  
35.3525469364579  
LOC642698 40.2543341073001 36.5219488315447 42.2577689927563  
39.9697332660833 41.6806984441849 40.4359177791566 47.2927436772465  
41.3506832276112 45.0997987980157 39.4710743516517 37.6484782516569  
41.7575097298927  
LOC642701 42.3433931248155 36.1232327599945 36.3604951341921  
39.9697332660833 38.1644569189523 40.3357777530419 37.9430145836712  
37.6557714476853 35.6139301508335 39.1621898366355 37.0180934800573  
31.9386613757097  
LOC642702 40.4639532172338 35.3307157989724 45.989212296035  
40.4359177791566 37.956732373465 45.0882356578404 40.3302268293707  
40.3357777530419 37.7384958256497 35.0082729554459 42.5426057453993  
36.5474283500601  
LOC642707 41.8409927585705 44.5884811528117 45.4865173433646  
47.3574589211166 40.5710637884029 47.6803619768589 44.4639405506967

39.3709357615493 44.1519466943185 41.8613406887824 38.4689132737495  
43.7672102682067  
LOC642711 39.5676051939342 42.5269793679335 43.4709415392696  
45.4634652319753 42.4864576619427 42.2577689927563 37.3799542961839  
45.8669209716694 42.7150227340364 42.0621425894624 34.7308008643142  
34.4570158133896  
LOC642712 50.6473771879221 47.087835967892 46.5650556481721  
45.0798408927912 49.0828761839116 48.0350549043063 55.9276266345493  
46.9986083378817 44.0519245668737 45.3530683538086 48.9754340235127  
49.7336769474446  
LOC642714 46.8141313516997 37.6383530120621 43.0971787292711  
42.0102671859606 35.6434124419782 35.7034203372528 39.4600924554505  
40.4359177791566 41.5635499110307 38.2069499294002 46.2560238004757  
41.7575097298927  
LOC642716 41.1523487516364 41.8848959280916 43.3085358214154  
46.4555908533915 40.2449343247539 43.2805590023412 44.3440839686558  
47.6952179922944 49.1940901905636 47.4767851750188 43.844855336215  
43.3744503319109  
LOC642718 43.9309845324767 37.8217989841918 43.3085358214154  
46.1673159982664 46.8674366115656 39.8455060654531 42.9803717121865  
51.2623287419357 40.8970401536578 41.9666541498638 40.0766543123257  
41.4508241771315  
LOC642720 43.5710871617107 40.8880530359822 40.7620472083159  
39.066284740632 35.7973685350741 44.0804700754786 39.5496902678788  
40.1474543172332 38.1169703906207 40.1179210534118 40.4504608195666  
37.2810767789306  
LOC642726 40.9558083259517 45.5587966941116 54.1637401903523  
51.5913529948887 45.3675390992851 43.6427759607073 47.0874209746031  
45.4882438975269 45.5238446102876 46.4944619663072 43.9802831041664  
43.5738557773903  
LOC642730 32.742439449766 32.5482839399637 34.4716904283753  
35.49696651597 33.2021437980841 36.8059561571675 37.6036146841933  
37.6557714476853 37.2810767789306 31.2688290305385 34.9428206949566  
38.1421709520616  
LOC642731 38.7537364570873 41.554942319225 38.6727842796202  
41.5464765641928 47.0954207417646 55.7197525213035 47.1345949868029  
42.8482181313226 42.357910063876 40.5090849993014 42.0750889188255  
42.6758568421347  
LOC642732 47.3791873993182 72.2016884438365 58.0218262176065  
61.8997157694697 45.6895223823001 64.9498081060676 44.2166118829877  
47.6952179922944 56.0496524902806 48.7414853386615 53.9517841438975  
47.7962548556026  
LOC642733 46.7293238583888 41.6466169548846 40.6737160001291  
42.5664883002833 41.9842695818285 45.3882138838137 40.2154497375715  
45.642304356051 45.2897806651929 39.9948390976317 39.153226699662  
45.9693232070002  
LOC642736 40.5654775358427 43.0971787292711 41.437237454134  
43.5627649099623 47.0954207417646 41.8613406887824 39.2533668167483  
44.7044140979108 41.5635499110307 39.8873706855774 42.2618615571566  
42.4607795638552  
LOC642740 53.4921736109774 41.3610369241157 48.3847843498476  
53.593974682612 38.9496515344837 43.3785777889265 47.2927436772465  
41.5464765641928 48.6494451061637 45.2556760873335 44.6286581923295  
52.8455400026194

LOC642743 37.2474303302343 34.2618170189676 43.1931731665131  
45.334106390212 35.1411239266238 45.3882138838137 43.3262148375525  
36.1375121409002 38.1169703906207 38.4187686307607 39.0550139257658  
35.3525469364579

LOC642744 37.6397652536077 36.89524015739 40.8420925848403  
40.4359177791566 41.467005949568 38.5252456306656 39.8695929627783  
52.6960621424156 41.9635525160083 43.0919221375514 43.401782064778  
39.3575468494941

LOC642749 32.5418171758086 36.6968906669565 42.2577689927563  
37.29566077996 32.6463318577756 37.0180934800573 32.6039814489621  
35.1738399826814 37.7384958256497 32.2133093774284 35.3362091871364  
34.9138625012006

LOC642751 39.8662795144616 39.9697332660833 50.1860191642359  
49.7350276169552 42.4864576619427 42.9695585740813 38.5066108855005  
44.4031868028216 42.6366765186182 39.8873706855774 40.4504608195666  
48.4535991392809

LOC642755 359.082840694691 437.015713629277 591.192020333181  
248.924819383887 411.114836576804 541.85051890123 226.553946570328  
314.609371608151 343.304521604977 455.898996745515 470.231929311877  
373.626843592567

LOC642756 41.9407041937973 44.5884811528117 40.4070046183108  
42.9358255168086 41.9842695818285 47.3791873993182 42.4939802311136  
48.6441988290952 48.9931786790166 48.0211752672327 43.5710871617107  
45.6692241948108

LOC642757 42.442231667357 40.148780650831 37.7384958256497  
36.1562979552173 38.5512429290626 37.0180934800573 38.1793598983615  
38.4540849632254 36.6312676076142 34.2638875325204 36.8282383070068  
37.1747156131306

LOC642759 36.0144420013819 38.7344853699576 38.4043916290561  
42.0102671859606 40.3452320167286 46.6872654833579 36.9355798143571  
44.9977782988116 42.4540072551568 44.2580151149956 44.3763859390287  
38.5279745308203

LOC642761 43.5710871617107 45.0905928998779 37.7384958256497  
36.0481934423077 42.7982502551634 41.554942319225 40.3302268293707  
40.931294690669 39.3750969348308 39.4710743516517 40.4504608195666  
44.5432192783161

LOC642762 41.1523487516364 45.9266745571724 45.063792968927  
39.066284740632 45.5809132232681 43.1826328292558 49.1067959632109  
40.2382908228517 39.853866204927 36.6893251782922 45.8180710486329  
42.1537476443423

LOC642765 40.4639532172338 45.7317208802318 40.5734458834617  
52.5307002738469 41.2740822675592 43.9724628401189 50.8388984085636  
45.1714698794331 45.9227107476843 42.6793753550854 48.1352470945488  
47.6938628797168

LOC642767 39.9697332660833 43.2649781354792 43.0016969050339  
40.5484717678957 42.7107928951766 41.159706131351 38.6243997507646  
41.9315419791594 45.3756389170606 45.7911932481722 41.7272875295469  
41.2437378488025

LOC642769 51.0225132036905 39.3999056968598 39.2707964550441  
40.8681871019812 42.0709558258414 43.9724628401189 36.3194282084339  
41.0381860307445 37.10170285405 46.2286164776607 39.9899430628542  
46.0633179231318

LOC642771 49.8472708021525 38.6414316877471 37.8386378737561  
43.074472921841 41.5668884168669 37.7000400506818 33.4316681623175



41.3506832276112 46.2027193115397 39.4710743516517 42.5426057453993  
37.3600014814388  
LOC642772 44.1294459089314 42.9358255168086 43.4709415392696  
38.0958223740111 39.5595233162192 41.3553369544097 42.357910063876  
44.4031868028216 40.8970401536578 41.5435611403119 43.6629145624937  
45.2783024981315  
LOC642773 40.5654775358427 46.9919960628953 41.3366779545815  
46.7577982595088 42.7982502551634 44.2607789091176 48.9826868640753  
39.9576138799997 52.9482338979681 36.1550293353654 40.723990462047  
42.0424641526302  
LOC642775 39.5676051939342 39.6123051184545 45.063792968927  
43.1847628331565 40.0599807618105 48.1591264215184 40.2154497375715  
39.2672712041774 38.5252456306656 41.0057887014368 40.547835538778  
39.4490233720848  
LOC642776 44.7915315085948 41.3610369241157 41.2365089689635  
41.7614975630362 43.9450023643394 43.6670755115848 43.8206425661746  
40.4359177791566 40.6957787921451 43.6033221838149 44.1148826235374  
42.9887069977696  
LOC642778 38.385865183581 36.1232327599945 32.1218888714537  
36.1562979552173 36.9702228618069 36.3845892764084 32.9962272670005  
33.6816578730693 37.2810767789306 39.1621898366355 34.5633623842083  
35.7451401627836  
LOC642780 48.8664053292403 48.0654860391912 55.6050719338367  
44.7980740332174 52.8190882379316 42.357910063876 45.5683029249676  
43.3925093042325 42.1046072075724 44.4325536348082 41.7272875295469  
43.9309845324767  
LOC642781 41.9407041937973 41.6466169548846 46.1653991089885  
39.6292788039793 38.3561682218911 38.9378717994178 45.8980298854198  
38.1835938174625 46.1101825640108 42.9866214102525 46.824299585607  
42.357910063876  
LOC642782 39.8662795144616 40.3871853021674 43.7052389230253  
44.7520317855773 43.5047914459255 40.5710637884029 45.0241191707651  
41.5464765641928 42.0194325009671 42.0621425894624 40.0440633413412  
40.5213071921891  
LOC642785 32.0823591288671 38.7344853699576 35.8265993915844  
41.4273122914951 34.7018263647985 39.4953494583071 38.0598374201407  
36.3405039629059 37.2810767789306 43.9450023643394 36.0481934423077  
33.8196020406676  
LOC642787 49.3463416794995 43.1805016690297 55.8810837854139  
49.1786207920603 50.7615314686244 48.3686935595826 55.5578334877425  
50.857522488428 45.8325181856483 51.9547984751408 49.1067959632109  
46.917149434588  
LOC642788 51.2851682978581 54.7855575216687 57.2960245538881  
68.9937449813561 68.1674425673171 42.750861693377 46.0228732507872  
44.8997235283254 50.401623258584 55.4037482627222 44.4688999098904  
51.3244198342335  
LOC642795 45.8108990837624 46.5650556481721 39.9101908547397  
37.5382094267692 37.5556299264699 45.2852528185486 40.3302268293707  
38.6454098044474 46.8873421271259 38.745552403895 41.5421429082231  
37.6557714476853  
LOC642797 43.4626049853157 41.7337506166619 44.7829632472754  
40.7481155008596 42.0709558258414 40.1428591998404 37.2892641289258  
38.6454098044474 46.4164127487052 45.6868589181768 41.0050831223107  
39.9519547348106

LOC642804 40.9558083259517 41.4508241771315 40.4882741869718  
43.6726153508978 47.2074332636566 45.6129956328415 43.0930293831497  
37.33030683349 38.8271346375425 44.6918600441328 40.1742127891824  
43.2776458914333

LOC642808 41.1523487516364 39.6123051184545 41.3366779545815  
38.6414316877471 49.7235523248653 41.4508241771315 40.6750540874299  
42.157627240486 42.357910063876 38.1042454705119 45.4799270968969  
44.5432192783161

LOC642809 49.9419897484381 46.8954576545929 43.1931731665131  
44.9370339275041 43.1252272136667 41.6590564937735 40.0052661202207  
43.7396619462033 51.1055541075029 42.5664883002833 44.8872784170036  
49.2064066614865

LOC642815 52.310270746917 50.8114699212931 49.6347864008749  
57.0629653735694 53.5594683028749 55.0009147092272 55.2088411137193  
56.2441895183416 53.2046867327331 46.0119912782855 51.3861659123096  
53.5643281930979

LOC642816 44.3754281580557 42.0546888913836 42.381482941987  
40.4893720023062 39.8167055578918 44.0423286480199 40.1235656101329  
37.9344616270526 40.8970401536578 39.0209841108908 41.5638908543693  
37.7526485343328

LOC642817 1186.06822787922 1876.51621222292 1780.14552702126  
754.700295017212 2196.59044510709 1999.21832626916 1259.2978319548  
1226.43929953115 1478.26733379357 709.284769121309 1037.51323185348  
2032.18819581205

LOC642819 44.7915315085948 41.8073910693411 40.7620472083159  
41.4273122914951 39.9697332660833 42.6575535390785 39.1539892144371  
42.6450179841129 48.8842909466002 44.0409178714232 43.1931731665131  
42.1537476443423

LOC642820 44.436995101921 43.7644428186265 42.0621425894624  
53.3967242431461 40.7779767565889 44.5544727111028 39.6535880152834  
41.4508241771315 43.1805016690297 39.9948390976317 39.4410515050885  
47.7962548556026

LOC642821 37.6397652536077 40.9731067463382 41.2365089689635  
41.7614975630362 37.7576900881741 47.8636003588181 44.3440839686558  
42.8482181313226 40.4997186069494 38.0078357808393 39.0550139257658  
41.9430737035925

LOC642830 37.0320432433314 38.3322849790657 42.7303139017786  
40.1804147506786 41.8806343997257 45.0882356578404 40.0052661202207  
42.357910063876 44.619512785899 41.9666541498638 41.2598458726002  
39.3575468494941

LOC642832 37.0320432433314 35.0222940937513 37.2838080935695  
33.9645433044281 39.6535880152834 41.7627910693483 36.7356360093603  
41.5464765641928 34.9428206949566 39.9948390976317 40.8225507267584  
40.9683275553869

LOC642833 48.9906383294199 41.3610369241157 42.5406888281114  
50.2163892855092 46.4343327861696 44.9896851005259 44.2166118829877  
43.2551508830106 51.7549258776884 41.6373771565199 48.1352470945488  
52.1918130336397

LOC642834 41.6354649482853 43.0227387991135 39.9101908547397  
44.550322123994 46.7508829977587 38.5252456306656 38.2933870238743  
46.7980335276155 36.0741672064298 45.2556760873335 38.2795150354677  
39.4490233720848

LOC642843 36.1232327599945 39.3999056968598 44.5134109184888  
36.3604951341921 37.7576900881741 34.6977013306396 38.8417151851134

39.7509165247419 35.860430241131 34.6720534245631 37.7384958256497  
38.2350720635382  
LOC642846 44.7915315085948 40.8880530359822 40.7620472083159  
40.7481155008596 44.0451487108213 38.6414316877471 44.3440839686558  
41.9315419791594 43.1805016690297 46.5650556481721 41.9083581529276  
43.4709415392696  
LOC642849 41.5421429082231 41.0678614026819 41.3366779545815  
43.9282059368202 38.6454098044474 40.4359177791566 38.7337086062875  
39.6474008369935 39.2809305246091 39.4710743516517 39.7342718293432  
41.7575097298927  
LOC642851 40.5654775358427 40.716553247236 35.5220586859301  
35.2143190355414 36.08956004634 31.9222834447339 38.4005795891396  
36.0306975524309 35.9645119596869 34.2638875325204 38.1835938174625  
38.0452862258803  
LOC642852 37.9387791625384 39.6995529770239 44.8872784170036  
40.4359177791566 46.6397391251762 38.6414316877471 44.4639405506967  
60.6706478075023 38.3418933808844 38.745552403895 42.7275315121163  
38.745552403895  
LOC642853 37.3463875295726 42.6939394537076 44.3344900481112  
45.4634652319753 39.6535880152834 41.0582900711341 44.4639405506967  
47.5950227477807 42.7150227340364 43.844855336215 40.4504608195666  
38.8495095797881  
LOC642855 36.4564050256915 35.5310164682026 40.0998167098057  
41.6564075217517 39.5595233162192 45.8325181856483 37.2892641289258  
37.6557714476853 40.6957787921451 36.9102644736882 43.6629145624937  
44.8372404608604  
LOC642856 38.957687788868 40.5400384479766 38.4043916290561  
41.4273122914951 39.1650142708257 41.159706131351 38.7337086062875  
39.5466975353131 34.0382693188794 42.1622837416589 48.8088340735921  
44.3521099857368  
LOC642859 49.4878464533902 50.4872122867759 41.8751578329365  
46.7577982595088 44.7114813656401 42.623655455508 40.1572444265517  
43.1889516931076 44.1519466943185 41.0650982158952 42.7275315121163  
44.0299389687796  
LOC642861 42.6036491382658 40.9731067463382 41.437237454134  
39.3750969348308 44.4489662507893 38.3418933808844 38.7337086062875  
37.9837233601316 40.9901805728485 42.0621425894624 36.43924066428  
44.8372404608604  
LOC642863 40.7609952437622 44.9370339275041 42.9104454767916  
45.5869891570251 45.8051846088552 46.8954576545929 39.3585350448719  
42.5435283762933 41.5635499110307 48.4890615340603 40.0766543123257  
44.9070250604284  
LOC642864 38.0089018744739 34.9262464079777 36.9795961564828  
42.0102671859606 37.5556299264699 36.3845892764084 32.8745892439217  
36.1375121409002 35.7973685350741 37.4302011516587 37.5583886316038  
39.6352613956998  
LOC642866 38.5007204246293 38.0226905622357 36.1042012504758  
36.1562979552173 32.771863438151 40.9506062495231 44.3440839686558  
45.3872406432794 41.3803269429468 39.1621898366355 41.1638563416981  
41.9430737035925  
LOC642867 41.0608773166058 40.7952353240579 41.8751578329365  
45.7397504535169 44.4489662507893 39.6251842352088 45.6042625176633  
43.3262148375525 41.074824727477 38.6454098044474 41.5421429082231  
44.3521099857368

LOC642869 38.6454098044474 42.6939394537076 39.2707964550441  
41.4273122914951 42.0709558258414 47.6803619768589 43.4544762830742  
38.745552403895 46.9739160257217 46.441301934328 44.0409178714232  
44.5432192783161

LOC642879 41.1523487516364 39.5050383901884 37.3687900733549  
36.5393857306744 37.8679241954337 40.1428591998404 34.4570158133896  
38.8495095797881 34.3842972343227 39.8873706855774 39.9070785037411  
35.7451401627836

LOC642883 43.6706764143908 41.7337506166619 41.6079958749402  
42.357910063876 46.7508829977587 44.6524308640784 40.6750540874299  
43.4544762830742 39.7537274655115 48.9826868640753 41.5421429082231  
38.6454098044474

LOC642888 38.957687788868 40.5400384479766 38.4043916290561  
51.3851157261451 39.5595233162192 43.8582747295766 46.0228732507872  
40.3357777530419 40.3316153483289 44.0409178714232 39.2542963855807  
38.4330755397458

LOC642889 36.5393857306744 41.8073910693411 42.9104454767916  
32.2212308728305 41.467005949568 41.2567470068038 40.5585676679482  
43.4544762830742 38.9834959368496 40.5090849993014 36.7283081422707  
42.1537476443423

LOC642891 40.7609952437622 44.2630383225933 33.281531405287  
43.6726153508978 44.5668141895992 44.6524308640784 37.2892641289258  
42.4580504587581 43.5669306063196 40.1179210534118 47.0940613507321  
38.3291713594599

LOC642895 40.7609952437622 47.6229101519945 43.4709415392696  
42.4580504587581 48.2748123114598 46.0364000143537 44.8643898647322  
44.5029690493211 45.0017158586743 44.1379638573455 41.2598458726002  
40.2669497398702

LOC642897 88.7928773498158 114.41703170676 159.925087917307  
84.8948024208923 108.168107241759 67.6817814091697 103.316970096472  
75.656434170689 140.648209468568 79.6133633483649 108.323780226301  
108.479856042609

LOC642902 42.6036491382658 37.6383530120621 40.8420925848403  
44.1483976313959 40.148780650831 41.0582900711341 43.6753843488695  
43.1567024035183 40.0403898620771 40.7063426028871 36.3390947880186  
42.4607795638552

LOC642903 44.436995101921 39.3999056968598 43.0016969050339  
42.5664883002833 42.1650127805175 44.9896851005259 46.5650556481721  
44.797320243931 41.1742244762318 39.0648733099061 43.844855336215  
45.9693232070002

LOC642904 40.148780650831 39.9697332660833 43.7630587657205  
40.8681871019812 44.147557390293 53.8461734834857 45.8980298854198  
40.831207953647 37.6383530120621 41.7405682794166 37.4642807402741  
41.5536168238478

LOC642914 41.3387790895716 49.2934904960601 44.2405728317107  
41.4273122914951 48.2748123114598 44.3648993568405 45.223075311113  
42.8482181313226 45.8325181856483 45.5776159432079 44.2142581488029  
51.5741598315033

LOC642916 47.8249696958403 43.3458769998118 57.423873475544  
55.6481366056639 36.2048942610546 48.260931742163 53.8687221233237  
45.8669209716694 45.9227107476843 45.9004543328976 48.3847843498476  
45.3763275588341

LOC642918 40.2087556903277 39.5573415356949 38.0958223740111  
40.4359177791566 39.7210115145672 38.7340969861754 38.1169703906207

38.5457716679071 39.9444191873552 39.8873706855774 41.3234441859498  
41.3481355128089  
LOC642921 78.7450149191851 47.9665737016961 59.9690744676539  
44.1483976313959 67.8233625051884 55.6242009731278 58.7585623394335  
65.5820437889838 82.7229468743536 88.2056147099779 81.2249082772437  
82.7394574977114  
LOC642922 47.8249696958403 42.0709558258414 40.5734458834617  
37.5382094267692 48.5000946421718 37.9951997351435 41.9393838138203  
47.3791873993182 45.0997987980157 40.4136535208406 49.8393069675192  
39.9519547348106  
LOC642930 42.7150227340364 35.8227939208521 42.8270038153139  
41.6564075217517 37.0526522140242 39.2248354955045 39.0458123429605  
37.7612949798895 39.853866204927 39.5637454855233 36.6298807161755  
41.1554481567603  
LOC642933 41.5421429082231 44.4411734611229 41.3366779545815  
39.3750969348308 40.8873907150245 44.5544727111028 48.8319884367456  
43.4544762830742 41.863927676552 36.5806287103157 36.5359455830388  
41.1554481567603  
LOC642934 211.279069257808 761.922486104216 361.524083649962  
144.427680369554 302.083293019113 874.419252731128 535.313561995599  
280.526935074437 388.336994961328 818.927157206447 464.671881584567  
529.210992541911  
LOC642936 45.9090659324223 46.5650556481721 47.7737810047679  
42.357910063876 40.2449343247539 46.0364000143537 40.7910160811527  
44.2159020605784 47.4699236780425 42.5664883002833 42.357910063876  
44.4475838947656  
LOC642938 48.1125722136997 44.2630383225933 42.4580504587581  
52.3004056941891 44.7829632472754 47.0027453663546 49.1067959632109  
45.7476095696859 43.6670755115848 44.4652605017595 39.3667161654772  
42.57175366709  
LOC642939 44.8914371498528 40.4359177791566 38.9790184198145  
43.5627649099623 42.9090346219023 44.9896851005259 42.629412460409  
44.5029690493211 40.4220196471124 39.8873706855774 43.5710871617107  
36.2582325396375  
LOC642943 43.844855336215 40.8880530359822 45.2313723727673  
50.0526763693329 43.1252272136667 42.750861693377 43.0930293831497  
45.642304356051 44.8997235283254 41.5435611403119 43.0971787292711  
41.3481355128089  
LOC642946 48.1513101664505 44.5152708955623 47.646800205189  
55.3345906164297 50.4586647350401 44.1379638573455 62.0404348860702  
64.0857968024251 49.951882213561 54.5518174219283 51.4413099192899  
50.8083040235059  
LOC642947 3391.65926812276 1796.47241860175 2113.73880184695  
2237.08790397818 1395.33665255999 1129.19103016599 2369.95344896703  
4344.25847766877 1511.33844030783 3313.98659031004 3282.4852236415  
2568.97574985073  
LOC642948 44.7915315085948 39.5050383901884 43.6670755115848  
37.9875302985336 34.2638875325204 44.0804700754786 43.0930293831497  
42.2577689927563 39.2809305246091 40.6022003765153 37.6484782516569  
36.2582325396375  
LOC642950 41.7397731376692 37.5469247328848 39.8299340037009  
40.4359177791566 44.5668141895992 39.7394181011603 41.706879587091  
37.9837233601316 44.5303781239209 44.0409178714232 36.9060997041453  
40.2669497398702

LOC642953 46.441301934328 47.087835967892 44.9758339877851  
43.1847628331565 48.8381507187986 43.8582747295766 45.223075311113  
66.9340967279385 54.5952754712007 54.1683282066029 51.7538628098347  
50.4847465816184

LOC642954 41.6354649482853 43.9421822132391 36.9795961564828  
40.4359177791566 41.0885562160946 37.9951997351435 40.9157352260901  
38.079222289614 46.8873421271259 37.6383530120621 36.6298807161755  
39.7411455670172

LOC642960 49.085741080241 49.4982025424177 48.3847843498476  
64.0903425729408 52.2089306840125 43.1826328292558 47.8947595316832  
45.7476095696859 49.5539622682049 56.8201201798712 48.2910530887214  
45.4799270968969

LOC642961 40.0557788909923 41.159706131351 43.0971787292711  
39.9697332660833 39.4693871570028 43.7630587657205 38.0598374201407  
40.2382908228517 37.3600014814388 38.6454098044474 40.3452320167286  
37.2810767789306

LOC642962 44.9896851005259 44.3529919625344 35.2101597814352  
47.9915414951747 40.6723334103791 39.9397419279057 43.3262148375525  
44.9977782988116 44.4395580493118 44.4652605017595 47.8284278211109  
49.5539622682049

LOC642965 38.6454098044474 41.3610369241157 39.991353369336  
44.0451487108213 46.4343327861696 42.157627240486 45.1017494688414  
38.4540849632254 49.2879849674517 40.2112371512838 41.9908237694988  
46.7182294568603

LOC642966 35.7012997405508 39.5050383901884 40.6737160001291  
38.9534635879195 43.844855336215 35.5158505219112 36.634024014558  
39.9576138799997 38.0213051227859 38.1042454705119 44.1148826235374  
42.0424641526302

LOC642968 42.442231667357 38.7344853699576 45.310660704531  
46.614092935749 41.5668884168669 48.260931742163 43.6753843488695  
41.7419877611072 41.4636047919453 42.9866214102525 38.3684202018524  
41.2437378488025

LOC642969 46.3390850717989 47.3536182445315 48.4890615340603  
47.0874209746031 48.9627346956003 46.7800033479223 55.4004611309636  
49.2901038327894 40.6957787921451 47.2299678280724 44.7926323492519  
46.2625470410195

LOC642974 40.8681871019812 32.8881500803623 34.5718473203083  
43.5627649099623 42.4864576619427 38.9378717994178 39.1539892144371  
46.8954576545929 39.853866204927 40.2112371512838 40.3452320167286  
36.7762265039864

LOC642976 38.7537364570873 37.6383530120621 41.9666541498638  
42.357910063876 37.5556299264699 40.7616966228404 36.4098694708483  
43.6434576713809 38.9006788676407 42.1622837416589 42.2618615571566  
45.0985088502363

LOC642978 43.844855336215 42.3550738181144 42.157627240486  
45.8844325913247 43.1252272136667 44.4619248757502 41.1507980856436  
38.956280281655 42.9020321355927 43.844855336215 44.553780984244  
39.4490233720848

LOC642980 44.6717213146407 39.5050383901884 42.2577689927563  
41.7614975630362 42.039525923161 40.7063426028871 39.7162631015511  
37.7612949798895 38.6510172759977 40.0557788909923 39.4410515050885  
39.8497227447888

LOC642981 41.2424637338424 41.4508241771315 41.2365089689635  
47.2009420656854 44.6834648302383 44.0804700754786 46.5650556481721

40.931294690669 38.2215591930186 41.2276963324981 42.911855821602  
43.5738557773903  
LOC642985 47.9175508887533 40.5400384479766 40.4070046183108  
43.5627649099623 45.5809132232681 43.0860383229288 38.5066108855005  
38.5457716679071 38.0213051227859 41.8613406887824 39.6403089864678  
38.9496515344837  
LOC642987 43.0930293831497 37.5469247328848 40.6737160001291  
43.4410741327254 43.3332476888305 50.0748292497578 47.8947595316832  
44.293922970134 43.8482802038826 41.8613406887824 43.5710871617107  
40.8681871019812  
LOC642989 136.027869418465 171.705718494906 154.551927302005  
166.064317271991 157.356512456687 340.105993325165 117.439175394651  
163.261867589623 222.81957100654 269.113996642102 273.320144423733  
442.080188140864  
LOC642993 40.9558083259517 39.0894172982439 39.0775870687758  
29.0303154053123 34.0045980663271 39.7394181011603 36.3194282084339  
39.1652965788406 42.8036731479932 37.1275334308172 35.6041926503637  
38.8495095797881  
LOC642995 42.2618615571566 41.9894412416874 43.9019668459994  
42.281606728072 40.209110303983 41.399074748665 41.0808257270221  
41.6799375298398 40.4485515631112 41.8050782302835 42.8263096141654  
41.1554481567603  
LOC643000 42.2455707947223 39.3999056968598 39.5450079747895  
38.5252456306656 42.0709558258414 43.8582747295766 39.7576136507593  
37.6557714476853 37.3600014814388 39.5637454855233 40.9157352260901  
38.6454098044474  
LOC643002 32.6285977114039 39.3999056968598 45.1569741609597  
40.3180310664156 41.9842695818285 38.1169703906207 39.2533668167483  
38.4540849632254 37.4540772310118 41.9666541498638 39.7342718293432  
38.745552403895  
LOC643006 34.0467249875782 43.0971787292711 37.2838080935695  
34.3595588146954 37.3508690072156 40.7616966228404 40.0052661202207  
40.3357777530419 42.357910063876 39.0648733099061 39.9899430628542  
34.6720534245631  
LOC643007 62.7669079605627 68.921126710047 62.3245608177257  
74.2429851177794 74.8013460023603 71.1607965028029 90.0682241853516  
138.910687241655 80.5437011468815 100.849815617918 73.7873098190297  
88.6771566133367  
LOC643008 40.4179476219497 57.5941849631773 44.5544727111028  
40.591923288644 41.0615871536279 43.7078399718247 61.1630754250653  
82.9322141700549 55.6991707857987 51.6353042936059 48.3847843498476  
43.7410507935043  
LOC643009 38.5007204246293 45.6533175604486 35.7105247506212  
36.3604951341921 36.5393857306744 33.5578650644246 32.7676164492555  
34.6977013306396 37.5469247328848 37.6383530120621 37.0180934800573  
36.6603338274678  
LOC643011 64.546412747238 50.6229884142872 54.2670850492947  
63.9570596163747 61.3077641493507 51.1621379498014 64.7023558190673  
67.9103729751746 54.1745577382276 64.1097859982912 66.3481553496766  
58.7382738968248  
LOC643012 40.3478825593224 39.6995529770239 37.3687900733549  
38.745552403895 39.3667161654772 42.9695585740813 36.8369172900902  
39.3709357615493 45.0017158586743 35.2880714952489 43.6629145624937  
41.9430737035925

LOC643017 42.3433931248155 44.5152708955623 41.8751578329365  
45.4634652319753 39.0564222526273 41.3553369544097 45.1017494688414  
44.293922970134 43.8482802038826 42.5664883002833 40.2649309204478  
35.4484652445078  
LOC643018 43.6706764143908 42.5269793679335 35.3649449469275  
36.264823544143 35.4484652445078 36.3845892764084 33.3231576795423  
37.6557714476853 39.3750969348308 45.1569741609597 42.357910063876  
40.3691324547049  
LOC643031 7911.19531717602 2424.0414102425 4277.93019582362  
2712.36664370642 3395.70632198672 2978.46032143413 5636.93532853955  
11176.402230735 4986.44888767011 8630.67463560037 7980.71309230447  
5074.07305640514  
LOC643032 40.9558083259517 42.6939394537076 43.7630587657205  
41.8778873678551 38.4540849632254 44.5544727111028 34.806104801006  
38.6454098044474 41.7627910693483 37.6383530120621 42.0750889188255  
45.0035308952466  
LOC643033 38.7537364570873 39.6995529770239 45.8844325913247  
45.4634652319753 40.6723334103791 41.554942319225 39.0458123429605  
38.8495095797881 37.7384958256497 45.3530683538086 39.7342718293432  
40.0557788909923  
LOC643035 43.781101409552 50.9643363406241 50.7502704822135  
47.3574589211166 53.9488501599452 52.5799250974039 45.6706505553383  
47.834436078111 50.3745056312199 54.4825201506931 53.4921736109774  
45.9104478407175  
LOC643037 36.1232327599945 36.4002279956519 36.9795961564828  
39.1706564265495 41.467005949568 38.7340969861754 37.2892641289258  
38.8495095797881 38.3418933808844 39.4710743516517 39.8184668132023  
41.3481355128089  
LOC643038 49.085741080241 43.1805016690297 38.7745734037492  
41.8778873678551 36.08956004634 46.0364000143537 41.706879587091  
36.1375121409002 39.2809305246091 36.2435874904689 41.0808257270221  
35.3525469364579  
LOC643039 37.0320432433314 36.2103905554984 36.8730514568925  
39.7411455670172 40.4639532172338 39.132725377815 45.3597029614942  
40.6171774724171 43.8482802038826 41.2276963324981 38.5668610487033  
38.8495095797881  
LOC643040 40.6559419616644 40.8880530359822 47.5673419710251  
39.5050383901884 42.0709558258414 41.2567470068038 38.8417151851134  
44.293922970134 39.2809305246091 42.0621425894624 42.357910063876  
38.745552403895  
LOC643043 45.6517320730042 40.3384318592985 39.5450079747895  
39.9697332660833 43.004943518025 42.4155142987678 45.7452456977857  
42.7965563818112 43.9204029310411 45.3530683538086 43.2551508830106  
39.8497227447888  
LOC643045 39.266565827316 39.0894172982439 44.696023817801  
38.6414316877471 44.9936360641969 40.4359177791566 43.6753843488695  
34.6977013306396 40.5912213523345 39.1621898366355 35.2339574411711  
39.4490233720848  
LOC643047 41.6354649482853 41.6466169548846 43.8495248991589  
42.9358255168086 40.9950639693255 48.0350549043063 38.0598374201407  
41.1575777497576 35.5220586859301 42.3606390470387 43.7585538437696  
43.8575940017119  
LOC643055 36.1232327599945 37.7384958256497 37.3687900733549  
36.4564050256915 37.0526522140242 38.1169703906207 38.941855825269



40.3357777530419 37.9273653326866 39.1621898366355 33.2774014136617  
39.1553169409075  
LOC643060 32.821392987958 36.1232327599945 38.6005272730664  
39.3750969348308 38.745552403895 41.9543948167375 35.6056062164318  
44.8997235283254 38.9834959368496 38.6454098044474 40.3452320167286  
37.7526485343328  
LOC643062 36.8072833828297 40.7952353240579 34.9849896310235  
35.3829784221072 32.771863438151 35.5158505219112 38.8417151851134  
33.4534810696886 35.2143190355414 34.9138625012006 39.3667161654772  
33.2382077236252  
LOC643069 44.7044140979108 45.9266745571724 43.5710871617107  
39.6292788039793 49.0828761839116 46.263826584899 43.8206425661746  
48.272324215504 41.1742244762318 44.571915452417 44.553780984244  
44.6484005362281  
LOC643070 43.1805016690297 44.0409178714232 41.9666541498638  
48.1662933382789 41.5668884168669 43.2805590023412 44.8643898647322  
42.9301944191913 43.2761454096265 48.9826868640753 43.9450023643394  
41.863927676552  
LOC643072 42.1537476443423 37.3634897565502 43.9450023643394  
43.8002456102021 43.2484996523549 40.650742261428 41.9393838138203  
42.9301944191913 38.5252456306656 44.7958122466628 39.5399188536544  
38.745552403895  
LOC643075 35.8208542506595 39.6995529770239 39.7411455670172  
40.5484717678957 39.0564222526273 34.4896350146096 39.2533668167483  
37.1317006162938 40.8970401536578 40.2112371512838 39.9899430628542  
34.5633623842083  
LOC643081 40.8681871019812 37.7384958256497 45.063792968927  
40.3180310664156 34.6227169056411 40.040778349137 46.1634822993009  
38.079222289614 38.9006788676407 37.0320432433314 40.8225507267584  
42.357910063876  
LOC643082 41.9407041937973 36.9994058279362 43.8495248991589  
40.0698728584484 43.9450023643394 40.1428591998404 44.0687697278114  
44.1311654985682 43.9450023643394 41.6373771565199 41.5421429082231  
38.3291713594599  
LOC643083 36.4564050256915 33.6902293666089 41.3366779545815  
35.1451084093692 36.8059561571675 40.4359177791566 40.3302268293707  
42.357910063876 39.3750969348308 41.2276963324981 40.2649309204478  
34.6720534245631  
LOC643085 38.0089018744739 39.6123051184545 48.1331309338997  
41.4273122914951 40.5710637884029 38.7340969861754 36.8369172900902  
41.8417024632349 46.0106098064475 41.4397539024976 43.3085358214154  
43.6753843488695  
LOC643089 42.442231667357 43.3458769998118 42.9104454767916  
38.4208429103799 45.2556760873335 41.9543948167375 37.2892641289258  
41.8417024632349 44.2607789091176 43.6033221838149 44.8872784170036  
38.0452862258803  
LOC643090 41.0608773166058 35.3307157989724 38.6727842796202  
42.9358255168086 37.3508690072156 42.0574848021044 40.5585676679482  
40.6171774724171 34.4716904283753 41.9666541498638 39.153226699662  
36.5474283500601  
LOC643093 40.5654775358427 42.8542642792862 42.3536549114165  
40.0698728584484 42.0709558258414 39.0266821712099 44.8643898647322  
40.6171774724171 39.0775870687758 44.1379638573455 42.0750889188255  
38.0452862258803

LOC643094 41.4508241771315 38.0226905622357 40.6737160001291  
35.49696651597 39.7568367479301 41.4508241771315 44.0687697278114  
43.4544762830742 44.1519466943185 38.0078357808393 35.860430241131  
41.0657892043496

LOC643100 58.8224410806741 43.9421822132391 63.3544794716167  
38.4208429103799 48.9627346956003 42.750861693377 42.1607322031054  
45.5581356216957 66.1448688879431 43.9450023643394 54.2999306485758  
46.917149434588

LOC643102 41.5421429082231 44.2105195734073 41.6079958749402  
42.6222445667107 38.4135023167287 41.2098211956301 46.1634822993009  
39.4223544019653 44.0519245668737 43.0919221375514 42.2510526338368  
41.0226232127351

LOC643107 37.8386378737561 40.7952353240579 42.2577689927563  
38.3166554965434 40.5710637884029 38.7340969861754 44.4639405506967  
40.2382908228517 46.1101825640108 41.5435611403119 36.9060997041453  
40.0557788909923

LOC643109 54.7786516309154 43.683792219729 45.310660704531  
38.9534635879195 47.0954207417646 40.9506062495231 49.2546642180676  
36.6452480995946 51.7549258776884 57.2813205536176 52.1788489555942  
43.5738557773903

LOC643116 33.6902293666089 41.0678614026819 39.3709357615493  
40.1804147506786 41.467005949568 39.6251842352088 36.3194282084339  
43.1567024035183 40.3316153483289 40.6022003765153 41.7272875295469  
38.4330755397458

LOC643120 43.2724556187214 39.7835513496873 38.7745734037492  
42.0102671859606 33.9142669203111 43.6670755115848 40.9157352260901  
43.0390857698452 35.3227485563945 40.8049408996274 38.4689132737495  
40.9683275553869

LOC643121 44.8914371498528 42.8542642792862 45.3974838013476  
41.8778873678551 40.4639532172338 37.8102105794655 36.634024014558  
35.7973685350741 43.2761454096265 47.8207974930031 44.2142581488029  
43.9541718254769

LOC643125 50.2203578628217 39.1982470626863 38.9790184198145  
47.6687908290818 36.4434672195785 39.7394181011603 49.6872467499977  
42.6450179841129 38.6322728994674 40.3235655331796 37.7384958256497  
42.4607795638552

LOC643130 41.5421429082231 37.2810767789306 36.6522278218553  
41.7614975630362 38.8456942580061 39.2985791324641 47.7390230243778  
45.4757965005055 42.9020321355927 42.3606390470387 38.956280281655  
45.2783024981315

LOC643131 38.7537364570873 34.5023764006976 37.6557714476853  
35.49696651597 36.9060997041453 38.4330755397458 36.3194282084339  
39.4710743516517 40.7847110517594 37.6383530120621 37.7384958256497  
42.6758568421347

LOC643132 44.7044140979108 45.4882438975269 42.2577689927563  
48.665578118898 41.0885562160946 46.4648868771662 41.9393838138203  
46.9986083378817 42.0621425894624 41.8613406887824 39.153226699662  
47.6938628797168

LOC643133 41.2424637338424 40.8880530359822 40.4882741869718  
40.3180310664156 30.9891979286442 44.5544727111028 40.1235656101329  
41.1575777497576 36.6312676076142 42.5664883002833 39.9070785037411  
42.6758568421347

LOC643138 44.7915315085948 42.6022652963326 41.2365089689635  
35.8472302065546 40.2449343247539 46.263826584899 43.4544762830742

39.4710743516517 41.074824727477 39.9948390976317 41.9083581529276  
44.2527566343661  
LOC643140 39.3709357615493 39.9697332660833 39.1799070031819  
36.7892997857376 35.4484652445078 37.2686490268265 42.7431359850339  
37.1317006162938 35.2143190355414 35.0082729554459 36.9060997041453  
41.7575097298927  
LOC643142 41.3387790895716 39.5050383901884 38.7745734037492  
40.646702696033 32.9756367838345 37.8102105794655 40.3302268293707  
41.8417024632349 36.8127605061228 39.4710743516517 34.174642681781  
36.3454320848591  
LOC643143 44.6231541342 41.554942319225 44.6032218589199  
38.9534635879195 43.844855336215 43.4681646416585 55.4004611309636  
44.6107027295193 40.6957787921451 42.8936990772838 43.5710871617107  
36.449101775775  
LOC643145 33.4902421268456 37.920964499903 37.3687900733549  
38.745552403895 37.6527901109005 35.4142595025086 38.8417151851134  
38.8495095797881 39.1790517315259 41.7405682794166 38.1835938174625  
40.0557788909923  
LOC643146 35.7012997405508 40.6380495994768 40.6737160001291  
44.550322123994 46.3150221024046 45.8325181856483 46.0228732507872  
42.6450179841129 37.9273653326866 44.2580151149956 44.1148826235374  
40.3691324547049  
LOC643147 36.4564050256915 38.9338521051669 40.0998167098057  
37.7469621225553 40.148780650831 39.0266821712099 41.0381860307445  
44.0390019242862 37.1820543575123 39.2623423164488 39.9070785037411  
38.5279745308203  
LOC643149 42.1537476443423 44.3529919625344 39.0775870687758  
41.7614975630362 43.9450023643394 42.357910063876 46.4388841354122  
45.2806199505029 45.6582729799009 39.4710743516517 38.1835938174625  
41.1554481567603  
LOC643150 30.422292833952 39.6995529770239 42.9104454767916  
36.1562979552173 37.7576900881741 41.0582900711341 41.8315602975157  
51.8347877274018 43.0930293831497 38.6454098044474 36.3390947880186  
38.9496515344837  
LOC643152 41.5421429082231 39.2907645923217 40.5734458834617  
43.074472921841 42.3685136297603 35.0970060242246 50.3519150282938  
41.1575777497576 42.992884918158 36.0481934423077 36.3390947880186  
43.3744503319109  
LOC643154 46.0023068797812 42.5269793679335 37.6557714476853  
40.7481155008596 45.6895223823001 50.9724155054821 42.4939802311136  
38.745552403895 44.7058233759912 49.8393069675192 36.2435874904689  
38.9496515344837  
LOC643158 43.6706764143908 44.9370339275041 39.991353369336  
38.0958223740111 39.5595233162192 40.9506062495231 38.5066108855005  
37.33030683349 37.2810767789306 40.3235655331796 36.9060997041453  
38.0452862258803  
LOC643161 41.1523487516364 41.8848959280916 45.7968648044613  
43.9282059368202 37.6527901109005 47.2009420656854 47.7390230243778  
51.0724630072723 39.853866204927 41.1222709786153 41.4508241771315  
38.8495095797881  
LOC643169 42.1537476443423 44.5884811528117 44.5134109184888  
43.3078542962968 37.956732373465 52.6226745117396 45.223075311113  
43.7396619462033 37.9273653326866 41.7405682794166 48.3847843498476  
42.2577689927563

LOC643171 40.1145011765998 39.5050383901884 42.157627240486  
42.9358255168086 40.2062851265091 44.2307736942242 40.1662958063877  
40.5654775358427 44.014761416117 43.4598349902811 41.5638908543693  
43.1131704517186  
LOC643175 42.0532901689036 42.9358255168086 47.0940613507321  
44.7980740332174 39.3667161654772 45.3882138838137 43.3262148375525  
44.5029690493211 43.5669306063196 38.1042454705119 40.3452320167286  
40.4639532172338  
LOC643176 51.413025495745 45.1694246393676 52.4485219671976  
63.6334154351075 51.940083408061 43.5752393599169 56.7780520416533  
57.445796273665 49.4786466722535 51.5855515705917 49.5923712603197  
51.3244198342335  
LOC643186 40.148780650831 42.2577689927563 39.4710743516517  
35.49696651597 39.0564222526273 35.314469458379 44.0687697278114  
38.1835938174625 41.1742244762318 40.3235655331796 33.2774014136617  
36.6603338274678  
LOC643189 44.5282181324797 39.1982470626863 34.6977013306396  
38.9534635879195 35.2163900400329 33.4492509999281 37.2892641289258  
38.6454098044474 39.1790517315259 35.6208308220005 31.1150868775826  
36.2582325396375  
LOC643191 38.385865183581 33.6902293666089 40.4070046183108  
40.1804147506786 39.6535880152834 38.3418933808844 40.0052661202207  
43.3262148375525 40.6957787921451 39.6719190054379 35.3362091871364  
42.357910063876  
LOC643194 41.3387790895716 39.2907645923217 33.553634633839  
40.3180310664156 34.806104801006 37.1317006162938 37.2892641289258  
37.0390589468421 38.9006788676407 38.8507804383261 37.2018803984555  
41.863927676552  
LOC643195 37.3463875295726 38.3322849790657 39.3709357615493  
39.9697332660833 42.3685136297603 34.6977013306396 45.6042625176633  
37.86982638952 42.4540072551568 35.4990901121893 32.9879066304034  
33.8196020406676  
LOC643197 38.957687788868 37.920964499903 40.7620472083159  
47.6687908290818 44.147557390293 47.7556758818053 41.1507980856436  
44.1311654985682 33.802253812079 42.1622837416589 44.2142581488029  
38.5279745308203  
LOC643201 41.3708420203838 41.7337506166619 44.1976966800856  
45.1094678231052 44.3103029446931 40.9506062495231 40.7910160811527  
44.7044140979108 44.4812539947185 42.8936990772838 45.390192977585  
41.9430737035925  
LOC643203 39.7576136507593 34.3715326040967 40.5734458834617  
36.1562979552173 44.6834648302383 38.8336427948187 46.3057385979341  
34.5886782974123 33.2715481910159 36.2435874904689 40.2649309204478  
33.8196020406676  
LOC643206 39.9697332660833 44.9370339275041 49.3000844711116  
45.334106390212 52.2089306840125 48.7781962164988 45.4799270968969  
51.2623287419357 47.4699236780425 42.5664883002833 49.7363778831003  
46.2625470410195  
LOC643210 43.844855336215 39.2907645923217 43.6670755115848  
45.5869891570251 45.6895223823001 33.6859433472087 42.7431359850339  
40.1474543172332 37.7384958256497 40.3235655331796 47.0940613507321  
44.7401523707775  
LOC643213 36.0144420013819 41.8073910693411 45.5883690965192  
42.357910063876 44.4489662507893 40.3357777530419 43.1931731665131

41.4508241771315 45.3756389170606 39.7835513496873 45.8180710486329  
46.1592873342534  
LOC643216 41.8409927585705 38.5252456306656 39.8299340037009  
35.3829784221072 37.6527901109005 36.3845892764084 44.2166118829877  
35.7973685350741 41.9635525160083 40.8049408996274 36.9060997041453  
43.3744503319109  
LOC643222 48.2910530887214 40.6380495994768 37.8386378737561  
37.0732977341185 39.3667161654772 40.3357777530419 44.6032218589199  
40.831207953647 41.2870505273664 35.8304004211528 39.3667161654772  
37.5556299264699  
LOC643224 44.4639405506967 54.3303422997961 52.6275131390249  
41.3027031037343 64.193536444915 48.1591264215184 60.5125774827425  
46.1159021593282 48.8842909466002 48.4285440574489 42.7775752471711  
49.0986627051784  
LOC643225 40.148780650831 35.4484652445078 40.4882741869718  
43.5627649099623 37.0526522140242 36.1190722948669 37.3799542961839  
42.357910063876 41.863927676552 40.7063426028871 40.9157352260901  
39.8497227447888  
LOC643226 40.7063426028871 39.8369676404424 41.2365089689635  
41.8778873678551 42.2331334096358 42.0082685530808 37.1643693306382  
41.7932258301997 39.8763736543526 41.6657053704762 40.7670908011804  
39.7938220956242  
LOC643227 44.5282181324797 39.5050383901884 47.5673419710251  
38.9534635879195 43.4544762830742 41.6590564937735 47.5963750520409  
42.5435283762933 41.1742244762318 41.2276963324981 36.0481934423077  
41.4508241771315  
LOC643231 35.4287975493553 37.7384958256497 40.931294690669  
43.6726153508978 40.7779767565889 42.2577689927563 32.8745892439217  
42.7431359850339 43.1805016690297 37.4302011516587 42.2618615571566  
39.8497227447888  
LOC643233 47.0940613507321 32.6416008433981 42.640829914102  
47.0874209746031 32.6463318577756 37.8102105794655 44.2166118829877  
39.6474008369935 40.4997186069494 36.9102644736882 34.4716904283753  
36.2582325396375  
LOC643234 43.2724556187214 47.6229101519945 43.0971787292711  
46.7577982595088 49.32293280121 46.7800033479223 42.4939802311136  
42.9301944191913 39.6609238036815 48.7414853386615 45.1432412071268  
45.9693232070002  
LOC643235 44.0328992213727 48.1627097465883 46.2625470410195  
43.4410741327254 39.4693871570028 47.8636003588181 56.7780520416533  
46.9986083378817 43.3744503319109 46.6598879466655 45.5707650534259  
51.4308501933893  
LOC643236 47.5647821785529 44.5884811528117 41.8751578329365  
44.1483976313959 39.5595233162192 41.3553369544097 46.9929836306816  
46.1673159982664 38.0213051227859 40.5090849993014 44.553780984244  
51.7833333848627  
LOC643237 36.4564050256915 42.4493032770053 38.5045333213784  
43.3078542962968 41.2740822675592 42.357910063876 39.5496902678788  
36.8400213077707 39.2809305246091 36.6893251782922 42.0750889188255  
42.1537476443423  
LOC643240 51.413025495745 39.8695929627783 47.9035532886869  
44.1483976313959 51.3511088648386 46.263826584899 49.8281348927244  
52.1788489555942 45.8325181856483 49.1928206164702 46.824299585607  
45.0985088502363

LOC643242 41.3387790895716 41.6466169548846 45.3974838013476  
46.8954576545929 43.6587492470348 42.5660695551615 42.2577689927563  
41.3506832276112 37.4540772310118 44.4652605017595 39.5399188536544  
41.5536168238478

LOC643246 38.5648843914189 41.159706131351 37.0642268327439  
35.0448343468967 37.956732373465 37.9003288112261 39.6535880152834  
36.8400213077707 38.2215591930186 44.1379638573455 41.8168470823451  
42.0424641526302

LOC643248 42.6036491382658 41.7337506166619 45.6989664108554  
37.651298468202 38.8456942580061 45.6129956328415 36.634024014558  
37.5511560880902 40.4220196471124 40.6022003765153 41.0050831223107  
38.745552403895

LOC643253 42.7150227340364 39.3999056968598 43.0971787292711  
38.6414316877471 44.7829632472754 40.1428591998404 46.5650556481721  
40.931294690669 40.3316153483289 48.4890615340603 47.299647867533  
47.6040671292013

LOC643256 43.0001432913058 44.8529259387308 47.0055981216687  
43.074472921841 46.7508829977587 46.3715909653832 43.0930293831497  
48.7814131120945 44.619512785899 55.0016608333828 38.1835938174625  
40.6614700944853

LOC643258 44.3355304829989 39.9697332660833 41.8751578329365  
42.8235313007746 35.5220586859301 40.4359177791566 40.4359177791566  
40.047314525032 40.3316153483289 41.7405682794166 42.4580504587581  
39.3575468494941

LOC643261 36.5393857306744 31.7145380049678 38.8775560911841  
32.3671711013873 41.7929491793697 42.2577689927563 38.941855825269  
40.5158867964016 38.5252456306656 38.0078357808393 42.6366765186182  
40.2669497398702

LOC643262 43.0001432913058 43.2649781354792 42.2577689927563  
42.4580504587581 44.5668141895992 45.7300501624017 44.4639405506967  
41.7419877611072 42.7150227340364 40.5090849993014 38.2795150354677  
40.5703581862752

LOC643265 43.3638918705225 39.9697332660833 42.5406888281114  
39.853175885492 41.0885562160946 44.3648993568405 36.08956004634  
37.7612949798895 45.1899271235974 47.0055981216687 45.8180710486329  
38.3291713594599

LOC643266 36.6480005877129 46.8954576545929 43.0971787292711  
42.5664883002833 44.6834648302383 47.2927436772465 44.0687697278114  
42.0494116081998 44.5303781239209 40.5090849993014 45.390192977585  
44.5432192783161

LOC643272 58.0139597055449 55.2893984191264 47.646800205189  
47.481302504066 44.7829632472754 45.8325181856483 45.8980298854198  
44.5029690493211 48.3954967265007 47.3791873993182 48.6184776976167  
46.3411353377615

LOC643273 45.5758521267508 43.9421822132391 43.8495248991589  
43.4410741327254 49.32293280121 41.554942319225 42.0605906240248  
46.2779564481158 44.4395580493118 43.401782064778 47.4630625313159  
47.3172462673426

LOC643274 36.5393857306744 43.0227387991135 46.0727230219512  
46.8954576545929 44.4489662507893 43.6670755115848 39.4600924554505  
44.2159020605784 44.3440839686558 46.1390887492649 41.9908237694988  
37.2810767789306

LOC643275 42.7671420440641 42.5674652784208 44.0451487108213  
45.1944222548351 42.0323356348434 41.0970259989281 43.5627649099623

46.5331216396695 44.3734692860793 42.2614524730856 41.0554874392252  
43.2776458914333  
LOC643278 38.957687788868 41.0678614026819 38.5045333213784  
37.5382094267692 39.4693871570028 36.1190722948669 34.9344532055397  
36.7460922671619 37.0126425326534 42.1622837416589 38.4689132737495  
40.2669497398702  
LOC643283 39.1590964332473 44.8529259387308 44.3344900481112  
45.7397504535169 40.4639532172338 39.7394181011603 43.3262148375525  
41.2551966132486 41.7627910693483 41.4397539024976 38.956280281655  
38.4330755397458  
LOC643284 3690.00752647453 3905.8371644287 3043.12489526581  
3800.19142219719 3618.78958408675 3726.73487426505 2243.24648907474  
4048.33132153903 3749.78281766196 3234.36469403715 3562.96193568469  
5479.94045861143  
LOC643285 36.3649677956953 45.0905928998779 41.785676764591  
40.0698728584484 37.8679241954337 35.314469458379 34.6720534245631  
44.0390019242862 40.5912213523345 41.5435611403119 38.4689132737495  
40.2669497398702  
LOC643286 38.2083710281545 40.7952353240579 41.3366779545815  
33.1817617228171 42.269054475455 44.4619248757502 36.8369172900902  
39.0620487644635 37.7384958256497 42.9866214102525 40.3452320167286  
41.7575097298927  
LOC643287 160.100408020768 200.002687565519 138.81810375553  
118.762101740563 176.506718222092 218.478561986088 188.408367998553  
173.357715186701 200.93077689667 86.7076796107636 82.6602736441839  
121.036604456449  
LOC643293 42.3675565493382 42.985929467107 46.6241521517453  
41.2567470068038 45.3675390992851 43.2805590023412 40.6301588195752  
45.7030835309976 46.346728763401 41.800198520267 45.452834313916  
46.9919960628953  
LOC643296 38.6454098044474 38.6414316877471 42.9104454767916  
40.646702696033 43.6587492470348 37.1317006162938 40.2154497375715  
44.0390019242862 37.8319142847141 36.5806287103157 40.9157352260901  
36.7762265039864  
LOC643300 51.8122261766744 63.6695826053997 58.9676332048764  
46.1673159982664 79.5175547131776 64.1777305915695 54.4934782594218  
51.3907321092333 58.7382738968248 43.0919221375514 43.3085358214154  
58.8676535438762  
LOC643302 41.3387790895716 38.2263227947189 32.2133093774284  
37.651298468202 35.0181575202066 47.2927436772465 42.0605906240248  
36.6452480995946 41.4636047919453 39.2623423164488 35.6970528713709  
43.3744503319109  
LOC643304 44.7915315085948 50.7487159427973 42.3536549114165  
44.0451487108213 46.7508829977587 47.5733603903505 50.6774883370457  
40.7311497914871 46.9739160257217 44.8997235283254 42.7275315121163  
45.3763275588341  
LOC643310 297.023913988137 291.785618741057 340.491194032068  
282.90107781812 202.957014793417 415.477167615547 200.41782363596  
302.978457293429 299.665413950641 433.767439244344 480.386431986343  
496.444080712528  
LOC643311 35.3227485563945 38.4330755397458 41.8751578329365  
38.745552403895 41.6806984441849 40.040778349137 36.08956004634  
36.5393857306744 38.9006788676407 36.9102644736882 39.7342718293432  
38.5279745308203

LOC643313 48.0570064280814 47.4076235350059 58.865217170468  
52.039360725793 44.6834648302383 43.8308097066396 42.4493032770053  
51.7538628098347 45.0017158586743 40.848280311228 40.5824352835642  
45.063792968927

LOC643318 41.2424637338424 40.4359177791566 43.0971787292711  
44.550322123994 45.6895223823001 42.750861693377 54.9765783642973  
44.797320243931 38.7298222155532 42.8936990772838 46.5650556481721  
47.6938628797168

LOC643319 97.6205705034407 143.391384762612 216.63059645927  
126.599642760314 151.621572940457 121.557478857883 147.471179343348  
73.2037966614621 166.983092667334 57.6791750431251 71.5249259772583  
121.562769658314

LOC643320 45.6517320730042 49.0697565324841 39.1799070031819  
44.0451487108213 39.9697332660833 46.8954576545929 45.7452456977857  
38.4540849632254 46.7760357462635 51.4454142248566 43.0016969050339  
48.1627097465883

LOC643322 36.8072833828297 38.9338521051669 43.0971787292711  
47.2009420656854 46.4343327861696 43.3785777889265 37.9430145836712  
45.8669209716694 43.8482802038826 40.7063426028871 39.7342718293432  
44.3521099857368

LOC643324 42.8036731479932 40.0527893189096 45.1569741609597  
44.6905691366696 46.4343327861696 40.8634043028528 45.3597029614942  
47.2864663693787 41.4636047919453 38.4187686307607 39.153226699662  
39.7411455670172

LOC643325 45.7356815244513 41.8073910693411 48.8941062980393  
39.7411455670172 43.1252272136667 44.8872784170036 43.9450023643394  
41.2551966132486 49.4786466722535 41.6373771565199 43.3085358214154  
44.9070250604284

LOC643326 43.0930293831497 46.29198852834 46.4569566520107  
45.8844325913247 43.844855336215 42.8598805316863 45.6042625176633  
43.844855336215 45.6582729799009 47.1001757441025 42.357910063876  
42.357910063876

LOC643327 43.5710871617107 37.10170285405 38.7745734037492  
41.0726336841311 40.7779767565889 42.5660695551615 42.7431359850339  
33.3307770183871 44.0519245668737 36.8059561571675 36.7283081422707  
38.5279745308203

LOC643328 34.1336988442837 37.3634897565502 31.6419446793642  
42.357910063876 43.5544347011646 45.4882438975269 43.1931731665131  
44.8997235283254 43.6670755115848 33.1559412791294 43.0971787292711  
42.8864415494484

LOC643329 46.0920218698606 43.5182502375207 38.2280071951674  
40.7481155008596 39.859345745831 40.244271403831 48.8319884367456  
41.5464765641928 41.5635499110307 39.9948390976317 40.3452320167286  
41.9430737035925

LOC643330 38.2083710281545 42.1607322031054 37.0642268327439  
37.7469621225553 37.2567512265363 37.8102105794655 42.2577689927563  
38.3684202018524 38.6322728994674 34.7308008643142 36.43924066428  
35.0222940937513

LOC643331 33.2552842693684 33.8237407699472 36.2683886571585  
40.3180310664156 36.3390947880186 32.5219627196161 35.8227939208521  
33.2467975244196 34.226171989766 33.5412189543102 40.1742127891824  
36.7762265039864

LOC643334 44.8914371498528 37.1685072112618 43.401782064778  
38.9534635879195 43.5544347011646 44.5544727111028 38.6243997507646



41.2551966132486 44.1519466943185 38.957687788868 42.6366765186182  
38.3291713594599  
LOC643338 38.2083710281545 40.148780650831 46.3411353377615  
42.1273928203021 43.2484996523549 40.5281496800812 41.1507980856436  
40.6171774724171 40.3316153483289 40.8970401536578 35.6041926503637  
43.2776458914333  
LOC643339 37.0320432433314 35.0222940937513 41.6977706798234  
38.8495095797881 42.4864576619427 37.9951997351435 44.4639405506967  
35.0510338774593 43.2761454096265 41.4397539024976 41.7272875295469  
44.7401523707775  
LOC643341 41.5421429082231 45.4143854024453 44.3344900481112  
47.481302504066 40.4639532172338 42.5660695551615 44.0687697278114  
39.1652965788406 45.3756389170606 36.3612409063792 40.547835538778  
46.6397391251762  
LOC643344 42.442231667357 36.4002279956519 35.7105247506212  
38.9534635879195 34.4570158133896 35.5158505219112 33.7574445386307  
37.33030683349 38.4344387289956 34.5718473203083 38.1835938174625  
36.5474283500601  
LOC643345 39.6609238036815 38.9338521051669 43.0016969050339  
46.8954576545929 42.4864576619427 43.1826328292558 45.3597029614942  
39.6474008369935 45.1899271235974 43.9450023643394 42.8263096141654  
42.4607795638552  
LOC643346 44.9896851005259 44.7829632472754 40.301483914446  
43.5627649099623 41.5668884168669 41.4508241771315 38.6243997507646  
35.6825474397235 39.0775870687758 39.3698811593364 38.8507804383261  
41.2437378488025  
LOC643350 40.7609952437622 41.554942319225 45.4865173433646  
34.6468794865286 36.8059561571675 41.6590564937735 37.6036146841933  
38.6454098044474 40.0403898620771 41.6373771565199 41.3553369544097  
43.6753843488695  
LOC643355 43.0001432913058 37.6383530120621 43.1931731665131  
38.6414316877471 43.004943518025 37.8102105794655 37.830876898596  
42.357910063876 34.0382693188794 41.2276963324981 47.1477056711335  
38.8495095797881  
LOC643356 39.8662795144616 41.0678614026819 43.3085358214154  
40.5484717678957 44.3557408297309 39.9397419279057 40.6750540874299  
40.931294690669 40.6957787921451 40.5090849993014 44.0409178714232  
41.6550823405646  
LOC643357 761.341795853104 1202.11455437028 1174.92419086759  
644.150427468718 979.468753716758 904.487756674518 846.773659307087  
466.454993547103 999.862452730252 343.990395610093 474.55435126505  
996.520340280883  
LOC643359 43.4626049853157 41.8848959280916 41.6079958749402  
38.5252456306656 42.4864576619427 40.244271403831 46.4388841354122  
41.7419877611072 43.8482802038826 44.2580151149956 40.2649309204478  
39.3575468494941  
LOC643363 42.442231667357 40.9731067463382 41.6079958749402  
42.357910063876 40.7779767565889 41.9543948167375 41.253645578517  
41.4508241771315 42.2577689927563 44.1379638573455 41.5421429082231  
39.6352613956998  
LOC643365 33.7777950030073 36.0366673493555 38.7745734037492  
39.066284740632 34.1686574241133 37.4782441311626 36.9355798143571  
33.2467975244196 30.8360322325222 35.0668743708816 31.9682164860619  
31.372171135652

LOC643368 33.0463640202858 39.0894172982439 42.7303139017786  
41.1886975241176 44.7829632472754 41.6590564937735 42.1607322031054  
38.2782436497441 37.8319142847141 36.8059561571675 35.7953070087288  
44.3521099857368

LOC643369 39.266565827316 37.1685072112618 39.4710743516517  
41.1886975241176 39.859345745831 37.1317006162938 35.9058393060637  
36.8400213077707 39.7537274655115 36.6893251782922 43.3085358214154  
40.0557788909923

LOC643373 47.5647821785529 44.9370339275041 43.8495248991589  
43.5627649099623 41.7929491793697 46.6872654833579 40.5585676679482  
40.1474543172332 51.9545473262296 38.3092241935352 40.4504608195666  
41.9430737035925

LOC643377 33.1666036387511 42.8542642792862 46.5650556481721  
41.3027031037343 38.3561682218911 36.2015763253919 34.4570158133896  
38.6454098044474 51.2776048338 41.6373771565199 41.9083581529276  
38.5279745308203

LOC643378 38.1169703906207 42.8542642792862 42.0621425894624  
35.2143190355414 35.6434124419782 34.1806289878747 39.7576136507593  
37.9837233601316 42.9020321355927 39.7835513496873 39.9899430628542  
37.3600014814388

LOC643381 37.3463875295726 38.4330755397458 46.0727230219512  
44.550322123994 42.4864576619427 43.4681646416585 39.2533668167483  
32.7676164492555 42.0621425894624 42.1622837416589 44.4688999098904  
42.57175366709

LOC643382 42.8036731479932 45.0905928998779 54.9071823326024  
45.0798408927912 49.9493230064613 43.8582747295766 46.1634822993009  
40.5158867964016 44.8003345643334 56.685925255591 45.6348103033479  
44.8372404608604

LOC643386 41.0608773166058 42.3550738181144 37.6557714476853  
39.5050383901884 42.0709558258414 42.157627240486 40.9157352260901  
41.8417024632349 38.9006788676407 37.2089297656361 35.9563099719284  
37.4554876386402

LOC643388 49.7188990489616 42.6939394537076 41.6977706798234  
41.7614975630362 43.3332476888305 45.8325181856483 45.223075311113  
52.8622615027833 45.1899271235974 46.8954576545929 45.5707650534259  
48.6795178347248

LOC643389 53.7507429765038 49.1283590719461 46.2625470410195  
45.4634652319753 60.9710783023013 49.4157684139858 68.2708120569221  
55.5578334877425 49.2879849674517 71.3900857589616 51.524711857679  
51.6660481331154

LOC643391 39.8662795144616 42.0709558258414 39.2707964550441  
38.745552403895 38.2496050953547 30.0771630269067 39.2533668167483  
33.5578650644246 42.2577689927563 40.7063426028871 38.2795150354677  
38.3291713594599

LOC643396 53.3059058105836 51.119812302881 57.9279989359711  
43.5627649099623 54.1225249245036 44.0804700754786 52.8496345990125  
61.3864512710242 51.4413099192899 55.1089864632456 49.4593570700221  
48.7814131120945

LOC643397 43.2724556187214 36.7976562409506 41.1367478979484  
41.1886975241176 40.5710637884029 45.8325181856483 38.4005795891396  
38.956280281655 42.5406888281114 45.1569741609597 40.9157352260901  
44.5432192783161

LOC643401 41.0871827071116 39.0564222526273 40.9861485852278  
41.0273093212371 41.9322044100235 43.5474493120701 42.57175366709

40.6737160001291 40.9532623519852 40.8462613935508 40.7670908011804  
41.1554481567603  
LOC643402 41.4508241771315 38.2263227947189 37.9482157381008  
46.8954576545929 46.8674366115656 45.3882138838137 38.7337086062875  
44.9977782988116 44.8003345643334 43.844855336215 43.5710871617107  
42.0424641526302  
LOC643403 41.7397731376692 42.2577689927563 36.5474283500601  
43.1847628331565 38.9496515344837 34.2773859804062 44.9863726205428  
41.1575777497576 41.9635525160083 40.4136535208406 40.723990462047  
41.7575097298927  
LOC643406 41.7397731376692 38.7344853699576 46.0727230219512  
37.0732977341185 39.6535880152834 37.0180934800573 38.4005795891396  
42.5435283762933 40.3316153483289 50.7855742231932 42.6366765186182  
42.4607795638552  
LOC643409 37.55264801907 41.8073910693411 40.931294690669  
39.9697332660833 43.6587492470348 45.1873487463472 43.1931731665131  
49.6203214143464 36.0741672064298 41.0057887014368 43.5710871617107  
41.3481355128089  
LOC643412 44.6231541342 49.4982025424177 43.6670755115848  
44.7980740332174 46.0977687311222 46.4648868771662 44.7255207589606  
46.0633179231318 41.7627910693483 44.3648993568405 35.860430241131  
40.7704587752083  
LOC643416 39.3709357615493 43.5873188565519 38.2280071951674  
35.6928955245309 41.467005949568 37.9003288112261 36.4098694708483  
42.0494116081998 38.9834959368496 44.8997235283254 41.7272875295469  
38.0452862258803  
LOC643420 48.4849194706125 42.6022652963326 39.7411455670172  
45.5869891570251 41.2740822675592 35.6125439901743 41.706879587091  
42.8482181313226 45.7452456977857 38.528621456378 43.844855336215  
43.1805016690297  
LOC643422 46.263826584899 47.4740726032707 44.4311655729487  
49.3654837541353 50.6470461863549 47.0027453663546 53.4921736109774  
42.5435283762933 47.3791873993182 43.6033221838149 44.0409178714232  
39.6352613956998  
LOC643423 52.310270746917 80.3676231413295 70.8606919488782  
70.2541961995753 57.9161791762225 58.6439719071099 48.9826868640753  
53.1052228246467 54.4059109100338 67.0163226819964 70.7760293129408  
50.2163892855092  
LOC643424 43.2724556187214 35.0222940937513 40.8420925848403  
41.1886975241176 42.269054475455 40.7616966228404 40.2154497375715  
47.0940613507321 43.7630587657205 43.4885245598939 40.4504608195666  
41.5536168238478  
LOC643426 41.4508241771315 39.7835513496873 43.8495248991589  
38.9534635879195 42.7982502551634 40.3357777530419 46.1634822993009  
41.8417024632349 40.4220196471124 43.7303813515864 41.7272875295469  
39.8497227447888  
LOC643428 37.0320432433314 37.1685072112618 38.3166554965434  
34.9221408381038 37.1565984182084 38.3418933808844 42.9803717121865  
33.8558232866797 35.7973685350741 45.0155543555707 33.7948557837079  
38.3291713594599  
LOC643429 42.1537476443423 43.7644428186265 35.2101597814352  
45.1944222548351 44.4489662507893 45.6129956328415 42.629412460409  
37.33030683349 38.2215591930186 45.4614234442527 41.4508241771315  
42.2577689927563

LOC643430 46.441301934328 36.4002279956519 42.3536549114165  
46.614092935749 46.8674366115656 41.554942319225 40.1235656101329  
47.6952179922944 42.5406888281114 37.8217989841918 41.9083581529276  
43.4709415392696  
LOC643431 97.0254711947754 145.936763882526 109.503117647487  
38.9534635879195 62.6860949544223 42.8598805316863 99.1769280484821  
113.917429432477 113.026772174726 43.7303813515864 48.6184776976167  
61.0025829061063  
LOC643432 44.0328992213727 45.8669209716694 42.7303139017786  
52.3004056941891 45.1137938810047 50.0748292497578 47.1345949868029  
47.0940613507321 44.3440839686558 47.4767851750188 42.0750889188255  
45.6692241948108  
LOC643433 1413.36279821142 2024.4791883541 2101.59244895554  
1789.07186722972 3905.8371644287 2844.5506310828 2745.8277126123  
1817.14004766564 1686.40194722823 3217.83121827744 3021.24285327836  
2640.06306087033  
LOC643435 37.6397652536077 41.8848959280916 42.0621425894624  
46.3203995372658 45.5809132232681 43.2805590023412 40.7910160811527  
43.5544347011646 39.2809305246091 42.5664883002833 41.3553369544097  
41.6550823405646  
LOC643438 52.9240098541574 49.4067286971348 43.401782064778  
38.5252456306656 62.1836961153924 54.9108046955355 55.2088411137193  
62.4219686957673 52.2631308081333 50.4234835272833 50.0303076717704  
59.2035499250243  
LOC643441 43.3638918705225 39.7835513496873 42.6981470312295  
42.8235313007746 45.4751076037511 42.7122033534911 42.5534565507139  
41.5817737564592 40.646702696033 41.0650982158952 42.668311948721  
42.357910063876  
LOC643444 38.957687788868 40.5400384479766 49.9256753636167  
39.1706564265495 44.7829632472754 43.2805590023412 41.0381860307445  
54.5125550937898 40.5912213523345 46.8954576545929 38.6662194645633  
36.2582325396375  
LOC643446 87.2532250821857 159.835690229505 172.192366002756  
65.524821699432 136.172921695836 114.605149116084 114.113460279317  
61.7865043876727 107.654589391726 59.3406363431414 76.6232527679845  
92.4781449270918  
LOC643449 38.385865183581 41.6069493017095 42.5890635915791  
43.9744941494111 46.807320159421 41.3094485574845 43.0930293831497  
42.7965563818112 41.56354991110307 42.3606390470387 40.8681871019812  
43.3262148375525  
LOC643451 43.4626049853157 43.5182502375207 43.5710871617107  
45.5869891570251 41.8806343997257 40.1428591998404 44.7255207589606  
41.2551966132486 47.4699236780425 40.1179210534118 43.5710871617107  
44.0451487108213  
LOC643452 71.5484567134601 65.084620579901 76.7791768896805  
75.4466520363487 57.0504111569238 66.8632294055679 82.7853677822046  
70.8749669449099 80.6434122355417 59.3618843678775 67.0361353184222  
77.8620267163666  
LOC643453 48.6621527194963 45.2556760873335 45.989212296035  
53.3967242431461 46.9906120932727 46.0364000143537 39.3585350448719  
48.5681478665796 37.5469247328848 43.4885245598939 42.7275315121163  
42.0424641526302  
LOC643454 50.4872122867759 39.8695929627783 41.3366779545815  
38.4208429103799 46.5557478175976 38.8336427948187 42.0605906240248

45.9604707098953 39.6609238036815 39.1621898366355 41.8168470823451  
38.9496515344837  
LOC643461 42.0532901689036 47.6229101519945 46.2625470410195  
43.3078542962968 41.0885562160946 44.8872784170036 34.1889222434768  
43.3262148375525 40.4997186069494 41.4397539024976 41.0808257270221  
47.8931773060789  
LOC643464 46.6348258763289 41.9894412416874 39.4710743516517  
43.1847628331565 42.0709558258414 39.2248354955045 45.3597029614942  
44.5029690493211 45.3756389170606 40.4136535208406 43.0971787292711  
41.3481355128089  
LOC643465 44.3355304829989 42.9358255168086 42.640829914102  
37.651298468202 37.2567512265363 44.8872784170036 48.9826868640753  
39.2672712041774 41.074824727477 43.401782064778 40.0766543123257  
38.9496515344837  
LOC643466 44.0328992213727 39.7835513496873 45.310660704531  
49.3654837541353 49.9493230064613 40.650742261428 61.3620062177524  
42.157627240486 42.7150227340364 51.2318935933116 46.4205654140754  
49.3087627580849  
LOC643467 47.0940613507321 41.7337506166619 40.4070046183108  
47.481302504066 41.1868052124344 43.8582747295766 58.2315917325629  
40.7311497914871 49.4786466722535 40.8970401536578 42.911855821602  
38.6454098044474  
LOC643468 43.2724556187214 40.9731067463382 46.9040704638073  
38.9534635879195 37.3508690072156 41.554942319225 45.7452456977857  
41.7419877611072 42.2577689927563 37.5343260962758 42.357910063876  
40.2669497398702  
LOC643475 40.148780650831 44.2630383225933 41.785676764591  
49.6479308322777 47.2074332636566 42.2830035667142 44.8643898647322  
42.3887531663733 45.1899271235974 42.6366765186182 45.0985088502363  
45.0985088502363  
LOC643479 42.0532901689036 43.5873188565519 49.8344973836834  
42.2496337895968 38.745552403895 44.7804080899431 50.8388984085636  
52.407151732257 47.4699236780425 45.1569741609597 46.7386599624801  
37.9607839934735  
LOC643482 47.0940613507321 46.2286164776607 46.2625470410195  
46.4555908533915 41.1868052124344 43.6670755115848 42.9803717121865  
45.5581356216957 44.3440839686558 44.4652605017595 41.4508241771315  
44.7401523707775  
LOC643491 39.5676051939342 39.0102066700839 46.9040704638073  
41.1886975241176 43.7517118200398 40.7616966228404 41.8315602975157  
37.9837233601316 37.8319142847141 43.1839109702714 40.0766543123257  
43.0930293831497  
LOC643492 41.8409927585705 42.2577689927563 39.7411455670172  
49.5424425850549 41.467005949568 45.2852528185486 39.1539892144371  
45.3872406432794 45.8325181856483 41.7405682794166 41.3553369544097  
42.8864415494484  
LOC643493 44.7044140979108 41.9894412416874 45.1569741609597  
41.0726336841311 39.2608760193011 45.1873487463472 40.6750540874299  
46.4672637826582 43.2761454096265 41.3321861371202 43.844855336215  
44.9070250604284  
LOC643495 38.7537364570873 41.554942319225 40.931294690669  
39.853175885492 39.9697332660833 38.4330755397458 39.7576136507593  
36.7460922671619 37.8319142847141 39.8873706855774 36.6298807161755  
35.9604262434141

LOC643496 35.2267149016596 32.396635964353 42.9104454767916  
37.29566077996 39.6535880152834 37.1317006162938 40.0052661202207  
39.5466975353131 37.4540772310118 34.064698871541 36.2435874904689  
35.3525469364579

LOC643501 38.4330755397458 41.9495387255163 40.6737160001291  
40.3180310664156 41.3277288245157 41.7256940298128 44.8643898647322  
45.9604707098953 37.3043739460234 39.6251842352088 38.079222289614  
41.5536168238478

LOC643502 37.55264801907 47.3536182445315 39.7411455670172  
43.9282059368202 40.4639532172338 39.0266821712099 41.5817737564592  
38.1835938174625 46.3203995372658 39.6719190054379 44.7114813656401  
44.2527566343661

LOC643505 48.1125722136997 46.1569135229922 50.8303921211581  
42.4580504587581 48.8381507187986 47.2009420656854 53.3111230705754  
54.2877981508636 52.1788489555942 52.3304586399695 46.2560238004757  
49.3087627580849

LOC643509 6819.74871209328 3884.2191293028 4458.76622334251  
4898.89844391477 3575.78813099057 2528.6392272518 5566.52516420571  
6938.87250165681 3343.07293372655 6673.00322263275 6089.64191751349  
4427.89837060471

LOC643520 33.6902293666089 41.554942319225 38.2280071951674  
42.2496337895968 44.147557390293 39.0266821712099 42.629412460409  
37.9837233601316 36.5393857306744 35.4990901121893 34.9428206949566  
37.7526485343328

LOC643529 37.2474303302343 42.1607322031054 46.2625470410195  
42.1273928203021 40.4639532172338 43.1826328292558 46.3057385979341  
45.642304356051 43.6670755115848 43.6033221838149 41.8168470823451  
41.9430737035925

LOC643533 42.0532901689036 42.4493032770053 40.5734458834617  
40.4359177791566 39.3667161654772 40.244271403831 37.9430145836712  
40.6171774724171 36.0741672064298 38.6454098044474 39.7342718293432  
43.9541718254769

LOC643547 39.7576136507593 38.8336427948187 34.9849896310235  
43.1847628331565 36.5393857306744 36.1190722948669 35.1307934330047  
42.357910063876 38.8271346375425 40.6022003765153 38.3684202018524  
40.9683275553869

LOC643550 45.4799270968969 43.0227387991135 42.0621425894624  
40.5484717678957 47.0954207417646 42.5660695551615 41.9393838138203  
51.6660481331154 45.0017158586743 49.1928206164702 46.4205654140754  
42.8864415494484

LOC643556 49.1868644496737 48.5905518770847 61.62834757456  
43.074472921841 62.8270556619309 42.808889470973 47.209353240759  
46.5717043290731 45.9227107476843 41.9666541498638 48.5292718280498  
45.4799270968969

LOC643558 42.6036491382658 46.173139700538 44.3641050627455  
46.4072250178074 45.309807308023 46.1513019317765 41.7513290046251  
44.8767786202691 44.4395580493118 42.4229201717624 43.9734147861276  
45.1226428168214

LOC643559 39.7576136507593 44.9370339275041 47.7737810047679  
40.4359177791566 45.5809132232681 44.3648993568405 41.706879587091  
43.7396619462033 40.9901805728485 47.0055981216687 40.9157352260901  
50.4847465816184

LOC643563 41.8409927585705 36.4002279956519 43.6670755115848  
39.853175885492 39.7568367479301 44.9896851005259 44.3440839686558

40.3357777530419 40.5912213523345 42.5664883002833 40.6373400186325  
42.2577689927563  
LOC643566 38.957687788868 35.0222940937513 41.528370959196  
40.646702696033 43.004943518025 45.8325181856483 43.1931731665131  
41.1575777497576 45.2897806651929 36.8059561571675 47.1477056711335  
44.0451487108213  
LOC643570 40.148780650831 39.0102066700839 41.785676764591  
40.646702696033 46.6397391251762 40.8634043028528 47.7390230243778  
42.7431359850339 48.4869909888679 42.785429206422 43.1931731665131  
41.9430737035925  
LOC643576 42.5193208629123 35.3307157989724 41.1367478979484  
47.2009420656854 43.2484996523549 41.3553369544097 40.0052661202207  
38.745552403895 45.9227107476843 42.1622837416589 40.4504608195666  
38.1421709520616  
LOC643577 46.441301934328 46.29198852834 48.9944486068347  
48.309866878365 45.1137938810047 47.0940613507321 47.4439407315335  
48.3590401011623 40.3316153483289 45.6868589181768 47.9942520395434  
48.6037684272115  
LOC643580 50.5670783769975 33.939263369489 45.3974838013476  
44.550322123994 41.0885562160946 43.0860383229288 46.8613212048981  
42.7431359850339 44.1519466943185 40.7063426028871 47.8284278211109  
39.8497227447888  
LOC643581 44.8914371498528 42.3550738181144 39.9101908547397  
47.3574589211166 38.1644569189523 43.3785777889265 41.9393838138203  
41.7419877611072 44.7058233759912 45.5776159432079 46.824299585607  
40.3691324547049  
LOC643582 39.3709357615493 44.6918600441328 44.8872784170036  
44.550322123994 45.4751076037511 38.4330755397458 40.2154497375715  
41.5464765641928 45.0997987980157 40.5090849993014 40.1742127891824  
41.2437378488025  
LOC643583 47.1962846565261 38.3322849790657 38.7745734037492  
41.6564075217517 47.8075998240396 45.1873487463472 45.4799270968969  
40.931294690669 46.3203995372658 37.4302011516587 41.8168470823451  
42.8864415494484  
LOC643584 41.4508241771315 35.1224289925572 39.8299340037009  
38.4208429103799 40.2449343247539 42.157627240486 38.1793598983615  
41.1575777497576 38.4344387289956 38.6454098044474 37.9946685306274  
34.5633623842083  
LOC643590 49.4151347850687 46.2286164776607 48.1331309338997  
45.5869891570251 45.1137938810047 45.1873487463472 51.7714254834195  
44.5029690493211 48.0163377492228 49.8393069675192 44.7114813656401  
42.8864415494484  
LOC643594 37.6397652536077 38.7344853699576 42.5406888281114  
42.5664883002833 36.3390947880186 37.8102105794655 47.7390230243778  
42.357910063876 48.7358147030082 44.571915452417 41.7272875295469  
39.0536056496869  
LOC643595 44.0328992213727 34.5023764006976 39.0775870687758  
41.4273122914951 40.9950639693255 41.2567470068038 45.6042625176633  
39.9576138799997 41.074824727477 39.4710743516517 38.956280281655  
42.2577689927563  
LOC643596 38.6454098044474 39.0894172982439 41.9666541498638  
44.6905691366696 42.4864576619427 40.9506062495231 46.1634822993009  
37.7612949798895 40.3316153483289 41.5435611403119 36.0481934423077  
39.9519547348106

LOC643598 46.263826584899 45.9266745571724 37.5597671487621  
48.856176220627 39.6535880152834 44.8872784170036 48.1747307200218  
41.1575777497576 41.4636047919453 40.8970401536578 44.1148826235374  
44.1452943804044

LOC643599 36.3649677956953 32.0823591288671 33.8558232866797  
35.7674462337723 38.5512429290626 36.3845892764084 31.6981395162348  
36.43924066428 33.0463640202858 36.6893251782922 37.1059647239814  
37.4554876386402

LOC643604 41.0608773166058 38.1312950900467 35.0970060242246  
38.2041059863839 33.2552842693684 38.2293008890613 39.0458123429605  
33.3307770183871 36.3649677956953 37.5343260962758 34.4716904283753  
34.9138625012006

LOC643605 38.6454098044474 42.2577689927563 44.5134109184888  
42.6913548400127 40.2449343247539 41.0582900711341 43.8206425661746  
45.642304356051 40.5912213523345 42.3606390470387 39.3667161654772  
39.9519547348106

LOC643608 44.6231541342 35.7393138893354 47.0940613507321  
42.2496337895968 39.3667161654772 39.8455060654531 46.1634822993009  
40.1474543172332 42.7150227340364 42.1622837416589 46.6442692119997  
40.8681871019812

LOC643612 47.7267190613906 45.8669209716694 46.7508829977587  
47.9915414951747 42.7107928951766 38.2293008890613 46.8613212048981  
51.7538628098347 47.0804681460898 47.0055981216687 45.1432412071268  
41.0657892043496

LOC643614 48.9906383294199 45.9266745571724 47.2962360458401  
41.3027031037343 44.0451487108213 43.7630587657205 41.0381860307445  
47.6952179922944 40.8970401536578 39.5637454855233 43.9450023643394  
42.6758568421347

LOC643615 39.7576136507593 43.0227387991135 39.6451483836089  
42.5664883002833 40.7779767565889 47.4699236780425 45.8980298854198  
43.9366081640576 44.3440839686558 48.7414853386615 45.310660704531  
42.2577689927563

LOC643619 42.442231667357 43.1805016690297 47.9035532886869  
47.2009420656854 43.5544347011646 41.7627910693483 43.9450023643394  
46.5717043290731 48.0163377492228 44.7958122466628 46.7386599624801  
44.9070250604284

LOC643621 42.0532901689036 43.4396866157171 41.528370959196  
44.7980740332174 39.5595233162192 49.2050538150106 46.5650556481721  
42.7431359850339 39.0775870687758 45.1569741609597 47.6125796208753  
39.9519547348106

LOC643623 45.3872406432794 45.7317208802318 41.1742244762318  
43.8495248991589 41.3387790895716 40.7063426028871 49.1928206164702  
45.8176925260962 42.6366765186182 41.4397539024976 44.553780984244  
43.9541718254769

LOC643624 52.7948184519106 57.0575084219334 72.2339737080582  
57.2856683017619 56.8307116636372 52.3746819771982 56.1463616087682  
50.2391482329046 48.2123120250343 52.4887473044594 50.8373208590626  
48.27609330316

LOC643626 40.8681871019812 35.4484652445078 45.4865173433646  
43.9282059368202 40.148780650831 42.157627240486 39.3585350448719  
38.2782436497441 37.2810767789306 42.1622837416589 39.153226699662  
43.5738557773903

LOC643630 40.3478825593224 41.8848959280916 46.7508829977587  
47.3574589211166 42.4864576619427 45.3882138838137 41.9393838138203



45.1714698794331 38.9834959368496 42.8936990772838 43.1931731665131  
40.8681871019812  
LOC643634 37.0320432433314 42.6939394537076 41.785676764591  
41.5464765641928 40.8873907150245 43.9724628401189 34.4570158133896  
39.9576138799997 38.9006788676407 38.2069499294002 41.2598458726002  
36.1647506311964  
LOC643637 41.0608773166058 40.7952353240579 47.0940613507321  
39.1706564265495 45.8051846088552 43.2805590023412 37.1643693306382  
40.6171774724171 37.6383530120621 35.8304004211528 40.9157352260901  
39.3575468494941  
LOC643640 44.7044140979108 46.29198852834 40.1985790927248  
40.646702696033 38.745552403895 43.7630587657205 42.1607322031054  
43.2551508830106 38.3418933808844 40.7063426028871 41.7272875295469  
39.6352613956998  
LOC643647 39.3709357615493 35.7393138893354 40.931294690669  
38.5252456306656 41.8806343997257 43.5752393599169 48.1747307200218  
40.2382908228517 37.1820543575123 38.6454098044474 36.6298807161755  
39.0536056496869  
LOC643648 46.0920218698606 43.683792219729 38.5045333213784  
45.5869891570251 48.1473938886239 43.4681646416585 41.706879587091  
42.8482181313226 42.1594905198929 42.1622837416589 44.0409178714232  
46.5650556481721  
LOC643652 37.3463875295726 39.1982470626863 37.1643693306382  
37.9875302985336 38.3561682218911 40.3357777530419 38.5066108855005  
41.8417024632349 45.0017158586743 42.1622837416589 44.9713479185144  
37.4554876386402  
LOC643660 40.148780650831 53.1278271804774 56.0477607422828  
46.614092935749 43.3332476888305 41.159706131351 47.7390230243778  
49.8344973836834 57.678188678075 46.441301934328 52.2229654768933  
43.4709415392696  
LOC643662 43.0930293831497 44.8529259387308 40.7620472083159  
51.949834638817 41.9842695818285 45.2852528185486 44.6032218589199  
39.5466975353131 42.7150227340364 37.920964499903 38.5668610487033  
42.357910063876  
LOC643664 32.6285977114039 46.4385386401326 40.0998167098057  
40.7481155008596 40.3452320167286 35.5158505219112 37.0564573649223  
36.9355798143571 39.0775870687758 36.3612409063792 38.8507804383261  
38.5279745308203  
LOC643665 43.9309845324767 44.8529259387308 48.1331309338997  
48.1662933382789 37.2567512265363 41.6590564937735 40.3302268293707  
37.4484310268909 41.863927676552 36.4651112441576 40.723990462047  
35.8429598823818  
LOC643668 191.223290474417 127.486023318527 205.187554095744  
202.360546931172 156.02592319461 234.113622230498 139.814194128548  
92.681224908389 182.273794635176 79.7389069715403 84.2385359528743  
163.995560004001  
LOC643669 40.8091178323174 37.4181006952079 43.7630587657205  
40.0698728584484 42.8510579683751 42.1046072075724 45.4164642922183  
45.7476095696859 44.5303781239209 47.3010040326346 43.0971787292711  
44.696023817801  
LOC643672 36.0144420013819 36.2103905554984 34.8956628705329  
35.3829784221072 43.7517118200398 35.4142595025086 38.6243997507646  
44.4031868028216 38.9834959368496 41.2276963324981 36.7283081422707  
36.1647506311964

LOC643677 42.3433931248155 40.4359177791566 39.991353369336  
46.7577982595088 40.7779767565889 41.0582900711341 45.6042625176633  
44.1311654985682 39.4762546236449 45.2556760873335 40.2649309204478  
40.2669497398702

LOC643684 40.5654775358427 39.6123051184545 43.5710871617107  
43.0016969050339 44.915045386675 41.7627910693483 43.5627649099623  
42.9301944191913 40.5912213523345 40.6022003765153 47.1970991228159  
41.3948836161924

LOC643686 44.5282181324797 42.4493032770053 41.3366779545815  
40.1804147506786 43.9450023643394 47.0027453663546 43.6753843488695  
42.9301944191913 40.7847110517594 46.7646877499666 38.2795150354677  
38.4330755397458

LOC643687 41.2424637338424 39.6995529770239 42.3536549114165  
44.265834798964 41.0885562160946 40.5281496800812 43.1931731665131  
38.745552403895 43.6670755115848 41.6373771565199 42.911855821602  
38.9496515344837

LOC643690 42.7150227340364 34.15544299189 41.785676764591  
40.0698728584484 42.3685136297603 49.4157684139858 43.5627649099623  
41.8417024632349 38.2215591930186 39.9948390976317 40.547835538778  
42.2577689927563

LOC643692 37.0320432433314 38.4330755397458 47.0940613507321  
42.9358255168086 40.148780650831 41.554942319225 42.4939802311136  
44.4031868028216 38.2215591930186 38.957687788868 42.8263096141654  
43.8575940017119

LOC643693 42.8036731479932 38.9338521051669 45.5883690965192  
44.265834798964 43.3332476888305 41.2567470068038 39.1539892144371  
44.7044140979108 45.4799270968969 45.4614234442527 41.6336636285875  
48.3648494350286

LOC643695 39.8662795144616 43.2649781354792 43.6670755115848  
43.5627649099623 38.6454098044474 37.5887129572848 40.6750540874299  
39.7509165247419 40.4220196471124 40.8970401536578 40.6373400186325  
38.6454098044474

LOC643696 42.9104454767916 42.6939394537076 41.9666541498638  
38.0958223740111 35.1411239266238 38.8336427948187 47.7390230243778  
44.293922970134 45.7452456977857 38.4187686307607 44.2142581488029  
36.1647506311964

LOC643697 36.1232327599945 40.8880530359822 43.4709415392696  
47.481302504066 40.6723334103791 44.4619248757502 36.3194282084339  
47.3791873993182 47.798305839406 41.5435611403119 41.6336636285875  
42.1537476443423

LOC643699 39.4710743516517 41.554942319225 40.5734458834617  
45.0798408927912 39.5595233162192 37.9951997351435 41.3594868055879  
41.4508241771315 35.6970528713709 42.3606390470387 40.4504608195666  
42.6758568421347

LOC643700 41.5421429082231 34.5023764006976 43.5710871617107  
39.853175885492 40.0599807618105 48.8744644207821 44.0687697278114  
39.9576138799997 42.0621425894624 44.2580151149956 41.7272875295469  
43.7672102682067

LOC643702 43.7585538437696 38.8336427948187 40.301483914446  
35.2143190355414 42.3685136297603 34.6977013306396 40.4359177791566  
35.7973685350741 44.1519466943185 39.2623423164488 41.9083581529276  
37.4554876386402

LOC643703 43.0001432913058 40.148780650831 47.646800205189  
45.7397504535169 48.3814421939888 41.9543948167375 42.0605906240248

39.6474008369935 40.7847110517594 42.785429206422 41.4508241771315  
43.1805016690297  
LOC643712 43.4626049853157 38.9338521051669 47.7737810047679  
57.0629653735694 43.004943518025 46.1513019317765 44.2166118829877  
46.8954576545929 44.1519466943185 41.5435611403119 41.9083581529276  
45.9693232070002  
LOC643713 48.8941062980393 48.9259041798949 56.607199625498  
47.2009420656854 51.6869155634183 49.3172204533818 42.9803717121865  
46.9986083378817 45.6582729799009 58.5087296620514 53.9517841438975  
51.4968903591058  
LOC643714 42.442231667357 42.1607322031054 38.6005272730664  
40.7481155008596 39.9697332660833 45.7300501624017 40.1235656101329  
40.931294690669 42.5406888281114 44.4652605017595 44.2925355984056  
42.1537476443423  
LOC643717 44.7044140979108 38.9338521051669 37.6557714476853  
38.8495095797881 40.8873907150245 43.4681646416585 40.3302268293707  
35.6825474397235 41.7627910693483 39.3698811593364 40.1742127891824  
35.3525469364579  
LOC643718 37.0320432433314 44.1239711172417 37.3687900733549  
43.1847628331565 41.6806984441849 40.3357777530419 43.5627649099623  
42.9301944191913 37.3600014814388 40.8970401536578 42.6366765186182  
42.57175366709  
LOC643719 43.3638918705225 42.0709558258414 43.8495248991589  
42.357910063876 53.6907197364586 51.702461863489 44.2166118829877  
51.555506218204 46.0106098064475 51.6778366958973 47.9942520395434  
46.0633179231318  
LOC643720 40.2543341073001 45.3486182278177 42.2577689927563  
55.2214187655851 47.3172462673426 53.9517841438975 45.1017494688414  
40.831207953647 43.6670755115848 39.3698811593364 41.0808257270221  
41.9430737035925  
LOC643721 39.9697332660833 37.8217989841918 37.9482157381008  
45.334106390212 43.3332476888305 41.0582900711341 36.9355798143571  
39.853866204927 41.2870505273664 41.2276963324981 41.9083581529276  
44.4475838947656  
LOC643722 46.8141313516997 50.543526404059 41.6079958749402  
48.4916117779992 44.9936360641969 40.8634043028528 58.3675164086197  
37.7612949798895 64.3425836997629 39.3698811593364 36.3390947880186  
42.8864415494484  
LOC643729 35.9305494063137 37.2810767789306 38.9790184198145  
38.3166554965434 39.0564222526273 38.1169703906207 45.3597029614942  
46.3685439301234 43.9450023643394 42.1622837416589 37.8372168909583  
43.2776458914333  
LOC643731 37.1485601150873 43.0971787292711 47.7737810047679  
37.8442841690502 40.4639532172338 40.5281496800812 40.5585676679482  
43.5544347011646 39.1790517315259 37.4302011516587 39.8184668132023  
42.6758568421347  
LOC643734 40.8681871019812 39.3999056968598 38.8775560911841  
40.0698728584484 41.7929491793697 38.2293008890613 41.5817737564592  
36.2539950294089 42.6366765186182 41.3321861371202 42.357910063876  
36.449101775775  
LOC643738 40.9558083259517 46.9919960628953 50.1860191642359  
66.9218519793499 38.9496515344837 42.9695585740813 48.4859552186772  
47.2864663693787 45.4799270968969 45.4614234442527 44.7114813656401  
47.6040671292013

LOC643740 47.6397712007919 41.554942319225 43.9450023643394  
46.3203995372658 44.9936360641969 39.3841861812262 54.0170817319522  
41.8417024632349 44.1519466943185 46.0119912782855 42.6366765186182  
40.3691324547049

LOC643747 42.8036731479932 47.9665737016961 44.8872784170036  
37.9875302985336 44.8897737954573 45.9266745571724 45.1017494688414  
48.87875862356 41.6616444147804 33.4316681623175 48.3847843498476  
37.5556299264699

LOC643748 34.9138625012006 38.7344853699576 48.0191002461099  
33.6816578730693 41.6806984441849 49.5424425850549 35.6056062164318  
38.1835938174625 42.992884918158 40.2112371512838 40.8225507267584  
38.9496515344837

LOC643749 44.2350046179299 44.2105195734073 40.1985790927248  
44.265834798964 40.148780650831 45.0882356578404 44.3440839686558  
38.1835938174625 43.1805016690297 38.6454098044474 38.4689132737495  
39.4490233720848

LOC643752 39.7576136507593 39.8695929627783 41.528370959196  
41.8778873678551 40.6723334103791 39.3841861812262 38.7337086062875  
44.9977782988116 44.7058233759912 41.6373771565199 40.8225507267584  
36.6603338274678

LOC643755 46.0920218698606 41.8848959280916 39.3709357615493  
42.5664883002833 47.4548471240051 42.357910063876 37.1643693306382  
42.9301944191913 36.4476883897928 41.5435611403119 44.4688999098904  
41.2437378488025

LOC643757 47.5647821785529 40.0527893189096 48.2883694323339  
42.6913548400127 41.1868052124344 37.5887129572848 43.1931731665131  
56.0496524902806 47.5564423692142 41.9666541498638 44.6286581923295  
41.6550823405646

LOC643761 39.9697332660833 39.9697332660833 34.0382693188794  
37.29566077996 35.4484652445078 37.7000400506818 39.6535880152834  
39.6474008369935 37.10170285405 33.8984830800739 41.3553369544097  
39.5418280570561

LOC643763 40.5654775358427 33.3069622728735 34.8956628705329  
37.5382094267692 36.08956004634 35.2067831864574 36.8369172900902  
38.079222289614 35.3227485563945 35.8304004211528 37.2892641289258  
38.4330755397458

LOC643767 39.5676051939342 40.7952353240579 41.6977706798234  
49.5424425850549 38.9496515344837 37.3799542961839 39.8695929627783  
36.1375121409002 41.1742244762318 41.5435611403119 36.8282383070068  
43.1805016690297

LOC643770 38.2083710281545 41.3610369241157 38.7745734037492  
40.3180310664156 41.1868052124344 39.6251842352088 43.9450023643394  
35.9023742468744 33.4698406117406 36.3612409063792 44.0409178714232  
39.7411455670172

LOC643771 37.9387791625384 42.2577689927563 41.6079958749402  
41.0726336841311 44.147557390293 39.8455060654531 37.4772922422734  
40.4359177791566 39.5806465938526 36.1550293353654 44.2925355984056  
42.2577689927563

LOC643772 45.2875173643252 39.5050383901884 35.9305494063137  
43.9282059368202 37.0526522140242 47.8636003588181 44.2166118829877  
44.7044140979108 49.2879849674517 53.0357938671646 49.319499137678  
48.7814131120945

LOC643774 40.0557788909923 42.6022652963326 44.5134109184888  
41.6564075217517 38.745552403895 36.6996187567892 36.08956004634

40.6171774724171 37.9273653326866 38.957687788868 40.8225507267584  
41.5536168238478  
LOC643783 38.6454098044474 49.9547657591437 48.7039705048129  
40.646702696033 59.3611824459962 45.4882438975269 47.4439407315335  
46.4672637826582 45.8325181856483 43.844855336215 44.6286581923295  
48.27609330316  
LOC643784 45.1912496459517 41.4508241771315 48.2883694323339  
38.4208429103799 44.7829632472754 42.9695585740813 46.9929836306816  
43.2551508830106 44.8997235283254 39.5637454855233 37.6484782516569  
42.7782216342806  
LOC643787 34.8099089553046 39.1982470626863 38.9790184198145  
38.8495095797881 36.4434672195785 34.4896350146096 37.9430145836712  
43.0390857698452 39.7537274655115 39.9948390976317 38.745552403895  
38.9496515344837  
LOC643790 61.8529316708431 106.25367135266 152.920586451578  
73.1447139654971 148.42234459694 87.2437977005922 158.081235081686  
72.692416146584 147.65688475427 42.0621425894624 55.3942006156899  
67.1675878355908  
LOC643791 39.1590964332473 39.0102066700839 37.8386378737561  
38.4208429103799 38.5512429290626 39.2248354955045 37.1643693306382  
36.8400213077707 39.3750969348308 40.4136535208406 36.6298807161755  
31.6419446793642  
LOC643792 52.2236479204029 45.0905928998779 48.4890615340603  
47.3574589211166 44.3557408297309 49.4157684139858 41.4742337714895  
41.5464765641928 33.2715481910159 47.7180816682562 44.9713479185144  
40.3691324547049  
LOC643799 39.5676051939342 39.5050383901884 39.9101908547397  
42.6913548400127 35.5220586859301 40.7616966228404 33.8558232866797  
41.8417024632349 42.2577689927563 46.1390887492649 38.4689132737495  
39.9519547348106  
LOC643801 37.2474303302343 43.0971787292711 41.0356368374708  
43.5627649099623 45.3675390992851 46.574682061365 42.4939802311136  
44.293922970134 41.5635499110307 42.1622837416589 43.0016969050339  
43.4709415392696  
LOC643805 43.1805016690297 42.2577689927563 42.8270038153139  
44.9370339275041 40.0599807618105 41.159706131351 38.1793598983615  
41.1575777497576 44.8003345643334 39.8873706855774 42.8263096141654  
37.3600014814388  
LOC643807 40.9558083259517 39.0894172982439 45.4865173433646  
42.2496337895968 39.3667161654772 42.357910063876 44.3440839686558  
47.3791873993182 40.2274522635576 41.5435611403119 44.4688999098904  
35.3525469364579  
LOC643808 38.7537364570873 38.1312950900467 37.3687900733549  
40.0698728584484 33.5412189543102 39.0266821712099 43.8206425661746  
45.0972184964705 35.6970528713709 36.8059561571675 37.4642807402741  
36.1647506311964  
LOC643809 46.1673159982664 39.7835513496873 45.310660704531  
43.6726153508978 42.6022652963326 42.8598805316863 40.6750540874299  
49.3880946790306 39.853866204927 46.2286164776607 39.6403089864678  
45.7562276914441  
LOC643811 38.5007204246293 44.8529259387308 41.6977706798234  
38.3166554965434 40.6723334103791 36.6996187567892 40.5585676679482  
40.831207953647 41.5635499110307 41.0057887014368 37.8372168909583  
35.4484652445078

LOC643813 41.7397731376692 43.5873188565519 42.5406888281114  
45.1944222548351 43.5544347011646 47.7556758818053 56.3376046940285  
44.2159020605784 49.8304479381623 45.7911932481722 42.8263096141654  
38.2350720635382

LOC643814 40.3478825593224 39.8695929627783 36.9795961564828  
36.7892997857376 42.7982502551634 45.3882138838137 41.1507980856436  
39.2672712041774 35.6139301508335 36.9102644736882 38.6662194645633  
40.3691324547049

LOC643815 36.9060997041453 37.6383530120621 39.3709357615493  
48.1662933382789 33.8558232866797 37.2686490268265 39.4600924554505  
39.1652965788406 36.6312676076142 36.2435874904689 39.9070785037411  
39.7411455670172

LOC643817 42.442231667357 44.1239711172417 46.1653991089885  
39.066284740632 43.4544762830742 41.3553369544097 44.0687697278114  
44.1311654985682 38.7298222155532 36.6893251782922 40.2649309204478  
38.8495095797881

LOC643821 46.1673159982664 39.0894172982439 45.6989664108554  
44.1483976313959 41.3755760434934 40.4359177791566 42.357910063876  
44.9977782988116 40.8970401536578 40.4136535208406 41.0808257270221  
44.8372404608604

LOC643824 40.4639532172338 41.2214779019897 40.7910160811527  
42.7489468897708 41.3755760434934 43.0177448037924 42.2577689927563  
45.3872406432794 46.0106098064475 44.4294261786154 42.9634662926872  
36.9162349182365

LOC643825 37.6397652536077 39.6995529770239 44.0451487108213  
42.1273928203021 43.004943518025 37.9951997351435 44.0687697278114  
42.7431359850339 46.1101825640108 40.2112371512838 40.0766543123257  
42.2577689927563

LOC643831 48.8333989709933 42.1607322031054 43.3085358214154  
46.1673159982664 48.3814421939888 56.7429967489965 52.2476631126873  
51.2623287419357 50.1603795873336 51.5855515705917 49.319499137678  
52.9609836781499

LOC643834 41.7397731376692 38.0226905622357 42.2577689927563  
39.6705473876526 39.2839132447749 39.2985791324641 41.7614975630362  
45.0972184964705 44.2142581488029 46.4944619663072 39.7576136507593  
36.1190722948669

LOC643836 47.4819803871382 44.6918600441328 40.301483914446  
46.9919960628953 42.9655396732962 48.3119523820103 38.1793598983615  
44.9977782988116 43.1180113655693 37.7598032934773 44.4329005595031  
42.1860813954352

LOC643837 41.3387790895716 37.3634897565502 43.3085358214154  
44.1483976313959 40.6723334103791 45.3882138838137 41.706879587091  
38.079222289614 46.3203995372658 40.8049408996274 40.723990462047  
42.357910063876

LOC643841 39.0620487644635 42.3550738181144 37.9482157381008  
40.646702696033 37.3508690072156 42.157627240486 33.8558232866797  
40.6171774724171 38.4344387289956 38.0078357808393 40.9157352260901  
38.9496515344837

LOC643842 42.2455707947223 37.2810767789306 41.2365089689635  
49.7350276169552 38.0598374201407 46.574682061365 41.0381860307445  
41.1575777497576 41.2870505273664 39.9948390976317 39.153226699662  
42.1537476443423

LOC643844 37.7384958256497 37.8217989841918 38.4043916290561  
40.3180310664156 38.3561682218911 34.0045980663271 38.4005795891396

39.9576138799997 35.9645119596869 42.8936990772838 34.7308008643142  
39.4490233720848  
LOC643847 44.7520317855773 39.6995529770239 38.8417151851134  
40.3180310664156 38.9919142475596 40.5805725503899 41.5817737564592  
38.9074189954657 45.0666179335087 39.3303857231606 38.6335676551747  
41.3803269429468  
LOC643850 44.1294459089314 43.8495248991589 42.2577689927563  
45.8844325913247 41.7929491793697 44.0804700754786 44.7255207589606  
48.3590401011623 45.9227107476843 43.401782064778 42.4580504587581  
42.6758568421347  
LOC643853 36.6480005877129 41.2598458726002 38.8775560911841  
42.6913548400127 40.148780650831 45.9266745571724 42.8684958525042  
37.33030683349 46.581796165231 44.2580151149956 46.972521499515  
46.8129509799753  
LOC643854 42.2455707947223 44.4411734611229 43.0971787292711  
46.7577982595088 44.9936360641969 43.4681646416585 44.0687697278114  
50.7364620410977 42.5406888281114 42.5664883002833 34.6366195121669  
43.0930293831497  
LOC643855 50.9381343674699 43.7644428186265 44.6032218589199  
53.3967242431461 37.5556299264699 42.357910063876 44.6032218589199  
44.0390019242862 43.5669306063196 45.9004543328976 41.0050831223107  
43.9541718254769  
LOC643857 42.8036731479932 46.8954576545929 46.0727230219512  
50.0526763693329 44.147557390293 45.2852528185486 48.4859552186772  
46.7980335276155 43.4656637536244 44.1379638573455 48.6767028205398  
45.0985088502363  
LOC643866 39.1590964332473 44.3529919625344 40.931294690669  
42.4580504587581 44.9936360641969 44.5544727111028 41.706879587091  
39.3709357615493 39.7537274655115 40.7063426028871 46.4753015651202  
39.2469742642337  
LOC643868 39.8662795144616 40.8880530359822 36.8730514568925  
37.0732977341185 35.6434124419782 36.8059561571675 36.3194282084339  
36.8400213077707 40.5912213523345 39.0648733099061 39.9070785037411  
34.2141875904985  
LOC643869 42.1537476443423 38.5252456306656 42.4580504587581  
43.9282059368202 37.0526522140242 42.4580504587581 36.634024014558  
46.4672637826582 42.0621425894624 39.4710743516517 42.8263096141654  
46.0633179231318  
LOC643870 63.2753814090696 58.9910892923962 65.7670524353661  
78.0020909283414 66.8733921725051 77.0226403968683 52.4111687156893  
57.7805922926828 59.4236178078244 61.2604442862522 70.0965466297064  
83.9873645051122  
LOC643872 41.6354649482853 42.9358255168086 40.4070046183108  
47.6687908290818 40.6723334103791 46.6872654833579 44.2166118829877  
44.293922970134 46.9739160257217 42.1622837416589 41.9083581529276  
38.745552403895  
LOC643878 41.1523487516364 40.4359177791566 37.6557714476853  
39.1706564265495 34.6227169056411 42.9695585740813 40.0052661202207  
39.1652965788406 48.3119523820103 40.2112371512838 39.0550139257658  
38.3291713594599  
LOC643879 43.0001432913058 40.6380495994768 43.401782064778  
31.8431345631453 43.9450023643394 42.157627240486 39.7576136507593  
41.7419877611072 43.1805016690297 38.2069499294002 39.6403089864678  
45.1735152121056

LOC643882 84.3850767822327 63.2804984998739 65.3531590366085  
80.0042268333735 57.0504111569238 47.0027453663546 70.8835636550472  
157.9970294734 64.0541263553251 105.212030988223 105.277476070937  
87.1109435144663

LOC643883 42.8036731479932 41.8073910693411 40.931294690669  
45.0798408927912 37.956732373465 40.040778349137 36.08956004634  
43.3262148375525 37.6383530120621 38.2069499294002 39.8184668132023  
37.7526485343328

LOC643884 43.2724556187214 46.1569135229922 40.4882741869718  
45.4634652319753 44.6834648302383 45.6129956328415 44.4639405506967  
40.047314525032 38.1169703906207 40.7063426028871 41.4508241771315  
45.6692241948108

LOC643888 54.3554233228353 48.9259041798949 44.1452943804044  
47.6687908290818 49.8304479381623 60.5803031036931 61.6544855697851  
66.7530718914083 57.2716485658185 53.0357938671646 49.4593570700221  
55.3563533836982

LOC643895 38.5007204246293 35.2143190355414 33.9435456570176  
38.0958223740111 35.7973685350741 41.7627910693483 36.197424053556  
36.0306975524309 36.0741672064298 32.9981302187884 29.4322896559759  
37.5556299264699

LOC643897 43.3638918705225 40.4359177791566 44.0451487108213  
41.4273122914951 42.6022652963326 41.9543948167375 42.2577689927563  
44.6107027295193 45.3756389170606 38.745552403895 41.0050831223107  
40.8681871019812

LOC643899 42.3433931248155 40.716553247236 43.5710871617107  
41.1886975241176 45.3675390992851 44.2607789091176 36.8369172900902  
44.0390019242862 37.1820543575123 39.0648733099061 36.8282383070068  
44.2527566343661

LOC643900 42.7150227340364 43.3458769998118 40.6737160001291  
40.3180310664156 39.7568367479301 40.1428591998404 46.0228732507872  
42.8482181313226 40.2274522635576 34.064698871541 37.5583886316038  
43.2776458914333

LOC643901 43.844855336215 43.7644428186265 41.8751578329365  
41.7614975630362 38.1644569189523 35.9305494063137 42.629412460409  
44.5029690493211 46.2027193115397 49.4006068471301 41.7272875295469  
39.2469742642337

LOC643903 44.5282181324797 42.2577689927563 48.0191002461099  
49.1786207920603 44.7829632472754 41.4508241771315 45.8980298854198  
40.6171774724171 59.198088069573 61.6670071424359 50.9815930710768  
53.9431600945419

LOC643904 42.8036731479932 42.5660695551615 44.696023817801  
43.367124590178 43.3332476888305 41.2567470068038 45.2852528185486  
42.1874057736633 41.7233690251839 37.5597671487621 38.6662194645633  
42.1537476443423

LOC643905 38.7537364570873 38.2263227947189 40.5734458834617  
37.8442841690502 48.7288537840562 42.4580504587581 37.1643693306382  
42.357910063876 35.5220586859301 38.4187686307607 40.2649309204478  
43.9541718254769

LOC643906 35.8208542506595 38.6414316877471 41.9666541498638  
39.7411455670172 42.4864576619427 39.6251842352088 36.7356360093603  
42.5435283762933 43.2761454096265 36.3612409063792 45.2265319826548  
47.0130468198828

LOC643910 37.6397652536077 43.3458769998118 42.157627240486  
34.8137085420423 38.9496515344837 33.895835691032 33.9750800030909



39.3709357615493 35.6970528713709 35.7202909649682 41.0050831223107  
42.4607795638552  
LOC643911 46.9939712192224 64.2621389350588 47.7737810047679  
50.378948785456 54.2301964914419 42.4580504587581 73.4820932957859  
49.6203214143464 91.1834104205004 39.6719190054379 45.4799270968969  
47.9566297250148  
LOC643912 33.3307770183871 39.9697332660833 46.5650556481721  
39.066284740632 39.4693871570028 39.6251842352088 39.1539892144371  
38.079222289614 40.9901805728485 39.7835513496873 43.7585538437696  
33.4316681623175  
LOC643913 46.0920218698606 45.0115870036541 54.842638106265  
55.6481366056639 49.8304479381623 47.5733603903505 49.1067959632109  
54.0507720792049 46.4861258030402 48.2596564318071 45.1432412071268  
54.1941919612524  
LOC643918 40.0557788909923 42.7275315121163 37.7384958256497  
38.0958223740111 43.1252272136667 39.7394181011603 47.1345949868029  
39.8965727231863 45.2897806651929 43.7303813515864 37.4642807402741  
40.6273137602368  
LOC643920 38.5007204246293 36.89524015739 38.4043916290561  
36.7892997857376 41.3755760434934 35.4142595025086 36.8369172900902  
41.6466169548846 42.1594905198929 39.1621898366355 35.3362091871364  
42.1537476443423  
LOC643922 35.8208542506595 48.7847528954724 45.1569741609597  
53.8086134112366 39.6535880152834 41.159706131351 39.7576136507593  
42.2577689927563 44.2607789091176 41.6373771565199 42.4580504587581  
45.5800840647989  
LOC643923 40.018129854 36.8209886489281 40.7620472083159  
42.2496337895968 44.8897737954573 39.6833800000587 41.0381860307445  
38.2782436497441 41.6616444147804 45.2023300009435 39.4749602565407  
43.2177497174408  
LOC643927 34.9138625012006 39.3999056968598 31.6419446793642  
39.6292788039793 32.8704945047196 35.8227939208521 33.4316681623175  
34.064698871541 36.7267557061938 35.6208308220005 36.3390947880186  
34.2141875904985  
LOC643930 39.9697332660833 36.2103905554984 35.8265993915844  
74.0093517743852 37.0526522140242 30.422292833952 39.4600924554505  
29.2731027042641 35.7973685350741 31.7992509287736 33.9478220100351  
36.2582325396375  
LOC643932 49.7827734675743 45.2556760873335 48.4890615340603  
51.949834638817 51.3511088648386 51.3886035574416 53.8687221233237  
53.1052228246467 52.4539007817929 55.9283039581662 51.6414075056938  
53.4735821194294  
LOC643933 46.3390850717989 40.2493681589104 43.0971787292711  
40.8681871019812 40.5710637884029 41.0582900711341 44.2166118829877  
43.4544762830742 44.3440839686558 46.441301934328 45.4799270968969  
43.9541718254769  
LOC643935 47.6397712007919 45.5842286511645 45.6989664108554  
47.3574589211166 38.9496515344837 48.0350549043063 48.8319884367456  
41.4508241771315 42.357910063876 43.7303813515864 45.310660704531  
45.0035308952466  
LOC643936 42.466333667839 38.2263227947189 38.1421709520616  
41.0219290963778 41.1507980856436 41.0012755104374 45.9635923776719  
44.797320243931 43.9204029310411 40.9558083259517 42.6776449468246  
39.2469742642337

LOC643937 44.2350046179299 39.9697332660833 39.4710743516517  
37.7469621225553 37.6527901109005 49.1013967533186 46.4388841354122  
44.293922970134 34.6720534245631 45.4614234442527 43.0971787292711  
37.9607839934735  
LOC643938 40.6559419616644 44.2630383225933 41.9666541498638  
47.9915414951747 38.6454098044474 44.7804080899431 43.8206425661746  
45.2806199505029 42.992884918158 45.5776159432079 44.6286581923295  
43.3744503319109  
LOC643943 44.1294459089314 40.2493681589104 42.4580504587581  
41.1886975241176 46.0977687311222 41.0582900711341 44.3440839686558  
44.8997235283254 40.8970401536578 40.8970401536578 42.0750889188255  
42.9887069977696  
LOC643948 41.9407041937973 39.5050383901884 42.7303139017786  
40.9607305725196 41.1868052124344 43.9724628401189 40.7910160811527  
37.86982638952 38.6322728994674 33.2987269789328 40.8225507267584  
37.2810767789306  
LOC643949 108.323780226301 139.414044294473 113.539485042978  
154.509548705054 131.766252431636 211.654245727798 114.657635596229  
137.403148427792 185.165420581989 165.613176704286 259.553931603133  
228.984484917083  
LOC643950 46.1673159982664 46.4861258030402 47.9035532886869  
41.8778873678551 47.0954207417646 40.3357777530419 44.6032218589199  
44.4031868028216 44.3440839686558 41.3321861371202 41.5421429082231  
43.6753843488695  
LOC643951 35.4287975493553 36.4002279956519 35.4484652445078  
43.4410741327254 36.3390947880186 37.2686490268265 40.0052661202207  
34.9580369221164 36.9060997041453 36.8059561571675 35.9563099719284  
39.6352613956998  
LOC643953 38.0089018744739 37.920964499903 45.989212296035  
45.0798408927912 43.3332476888305 40.650742261428 40.5585676679482  
42.7431359850339 43.8482802038826 42.1622837416589 37.7384958256497  
41.863927676552  
LOC643958 46.6348258763289 40.148780650831 39.991353369336  
47.3574589211166 46.6397391251762 40.4359177791566 41.1507980856436  
38.8495095797881 45.2897806651929 44.7958122466628 45.1432412071268  
39.8497227447888  
LOC643959 43.9309845324767 38.3322849790657 41.3366779545815  
38.6414316877471 42.3685136297603 36.4986986135769 36.3194282084339  
43.1567024035183 40.5912213523345 46.1390887492649 42.6366765186182  
37.8490162439785  
LOC643961 41.8409927585705 50.0425298550559 46.3411353377615  
43.3078542962968 42.7107928951766 42.6575535390785 43.5627649099623  
47.8947595316832 52.0583273941813 44.6918600441328 45.0589947942306  
39.9519547348106  
LOC643962 42.0532901689036 41.7614975630362 44.3648993568405  
46.9919960628953 38.6454098044474 40.4359177791566 47.1345949868029  
43.0930293831497 42.5864346233886 39.3113207075992 38.6335676551747  
39.2839132447749  
LOC643965 38.957687788868 39.0894172982439 40.4882741869718  
32.9046688061235 33.7494761745342 35.314469458379 34.5633623842083  
40.2382908228517 40.8970401536578 33.4316681623175 43.0971787292711  
35.9604262434141  
LOC643968 39.7576136507593 37.920964499903 37.6557714476853  
40.1804147506786 36.2048942610546 37.5887129572848 36.9355798143571

39.2672712041774 36.6312676076142 35.2880714952489 39.2542963855807  
37.1747156131306  
LOC643977 53.4921736109774 61.4800543360853 73.0128142320238  
102.605473054584 60.2886873195135 58.3387916574158 71.5249259772583  
45.2806199505029 55.5751438859404 49.8393069675192 55.1804535845496  
60.8662233098324  
LOC643980 43.0001432913058 41.2262949117288 40.7222199182322  
40.4967168818294 38.2496050953547 39.8785903668981 44.2166118829877  
40.831207953647 38.7298222155532 44.3303034026662 37.6484782516569  
42.1860813954352  
LOC643982 36.8072833828297 39.7835513496873 43.9450023643394  
35.6027791404152 41.5668884168669 36.9060997041453 37.9430145836712  
43.4544762830742 45.1899271235974 37.1275334308172 43.4709415392696  
45.0035308952466  
LOC643983 43.4626049853157 41.554942319225 39.5450079747895  
44.1483976313959 46.1804647841331 44.8872784170036 38.4005795891396  
45.7476095696859 40.7847110517594 47.8207974930031 46.5650556481721  
44.1452943804044  
LOC643985 61.8529316708431 57.7757446006652 51.0539624358342  
44.4367387274922 84.6563174894574 47.0940613507321 73.6855877240541  
55.1109784383525 57.2716485658185 60.2877434874622 52.7817052791259  
54.3587260982091  
LOC643986 45.2875173643252 46.29198852834 43.4709415392696  
42.2496337895968 49.5666074434383 42.157627240486 45.1017494688414  
46.695848687694 46.3203995372658 48.1392888470269 39.6403089864678  
46.6397391251762  
LOC643988 43.5710871617107 44.6918600441328 44.1452943804044  
45.4634652319753 46.9906120932727 41.3553369544097 49.2546642180676  
43.2551508830106 51.9545473262296 40.6022003765153 41.3553369544097  
42.1537476443423  
LOC643990 40.148780650831 39.0894172982439 50.6987358483181  
44.9370339275041 38.3561682218911 38.6414316877471 40.6750540874299  
42.2577689927563 39.1790517315259 46.6598879466655 43.6629145624937  
39.8497227447888  
LOC643993 38.6454098044474 40.5400384479766 40.4882741869718  
40.3180310664156 48.0234896130991 40.1428591998404 39.5496902678788  
44.1311654985682 47.7086093893038 41.4397539024976 37.2018803984555  
41.3481355128089  
LOC643995 43.3098985178373 50.8114699212931 41.8389336728199  
43.8495248991589 44.0451487108213 42.750861693377 57.5955320223035  
47.6952179922944 50.8653197228395 43.8943892311541 41.2267153672559  
44.4951343330035  
LOC643997 89.7554896946341 96.8240908274121 86.1563473462864  
80.0042268333735 132.090336898032 97.4062608315831 113.039124313172  
102.818879165949 142.545268664218 65.429256309049 69.1129431075514  
104.573463811298  
LOC643998 42.5193208629123 39.0894172982439 41.6977706798234  
45.5869891570251 43.6587492470348 40.1428591998404 41.9393838138203  
44.5029690493211 42.9020321355927 47.2299678280724 42.911855821602  
44.2527566343661  
LOC644001 46.9939712192224 42.8542642792862 38.6727842796202  
44.6905691366696 43.3332476888305 41.0582900711341 36.3194282084339  
40.4359177791566 42.9020321355927 42.9866214102525 44.2925355984056  
46.2625470410195

LOC644003 46.8954576545929 42.4493032770053 43.7630587657205  
40.0698728584484 37.8679241954337 40.7616966228404 47.5963750520409  
38.8495095797881 44.8997235283254 40.7063426028871 41.9908237694988  
38.5279745308203

LOC644005 40.9558083259517 35.0222940937513 43.6670755115848  
39.066284740632 41.467005949568 34.3887641786747 42.9803717121865  
30.9078709537098 33.8558232866797 39.1621898366355 34.4716904283753  
34.4570158133896

LOC644008 38.5007204246293 36.4002279956519 38.6727842796202  
40.8681871019812 35.7973685350741 34.4896350146096 40.0052661202207  
40.831207953647 36.6312676076142 33.1559412791294 38.5668610487033  
37.7526485343328

LOC644010 38.7270975453573 41.4312041000995 44.5622847010474  
40.9157352260901 43.7517118200398 43.2805590023412 41.7503755215516  
43.6796077697854 39.2401708645213 39.8411395375591 43.917817324545  
41.5191828467556

LOC644011 44.3355304829989 38.5252456306656 41.785676764591  
35.2143190355414 41.9842695818285 44.3648993568405 44.8643898647322  
37.4484310268909 40.8970401536578 39.0648733099061 41.4508241771315  
44.9070250604284

LOC644012 43.844855336215 46.1569135229922 42.4580504587581  
42.9358255168086 41.467005949568 36.6271061451613 41.253645578517  
40.3357777530419 39.5806465938526 43.2988017098387 40.6373400186325  
35.5523662009011

LOC644014 31.8228237796461 33.0553208959996 42.640829914102  
29.4322896559759 34.7018263647985 39.7394181011603 36.08956004634  
37.0390589468421 34.7722083264266 43.7303813515864 38.3684202018524  
35.7451401627836

LOC644019 41.0198717297545 46.5872589066092 45.1846041469628  
42.0102671859606 43.6587492470348 41.0012755104374 44.0263754734997  
40.877937638724 40.646702696033 44.0491215090885 39.8617019260946  
42.357910063876

LOC644021 43.6706764143908 43.1805016690297 42.2577689927563  
47.2009420656854 38.6454098044474 39.9397419279057 47.2927436772465  
44.1311654985682 42.7150227340364 38.957687788868 44.0409178714232  
46.3411353377615

LOC644023 36.5393857306744 38.5252456306656 45.063792968927  
47.481302504066 44.4489662507893 43.0860383229288 43.1931731665131  
43.0390857698452 44.3440839686558 44.571915452417 40.8225507267584  
40.2669497398702

LOC644024 40.5654775358427 40.716553247236 45.6989664108554  
41.8778873678551 41.8806343997257 42.6575535390785 40.7910160811527  
43.0390857698452 39.1790517315259 40.7063426028871 42.4580504587581  
38.2350720635382

LOC644026 41.0608773166058 47.1332119496722 44.6032218589199  
40.646702696033 37.4470183315826 40.7616966228404 39.7576136507593  
39.853866204927 46.3203995372658 33.7883338848419 38.2795150354677  
35.2448979801094

LOC644029 2160.22713775462 2672.94421680196 1848.50311456636  
1652.85734308754 2721.97551918611 2951.88559311416 2611.32405374107  
1776.78784112613 2036.72286752819 3681.41904661708 2934.35616793443  
3726.73487426505

LOC644031 40.0557788909923 41.3610369241157 48.4890615340603  
37.4223289687135 41.0885562160946 41.2567470068038 34.806104801006

42.357910063876 47.27543600687 38.528621456378 37.6484782516569  
39.0536056496869  
LOC644033 187.672799470683 242.236207196941 140.175068871414  
201.208357379329 181.565843182713 162.447872391923 248.599530435666  
327.631923082696 150.051297690759 218.056839407813 156.456239358718  
145.694779669933  
LOC644035 39.4710743516517 39.6493706695391 40.148780650831  
40.4967168818294 40.3452320167286 40.040778349137 41.9918605927928  
40.188873541274 39.2809305246091 36.2885860224741 38.745552403895  
42.0424641526302  
LOC644038 42.7150227340364 43.5873188565519 40.7222199182322  
41.6045220683604 39.9088079891223 39.066284740632 40.8681871019812  
43.2890595186135 43.7630587657205 42.9866214102525 41.4508241771315  
45.223075311113  
LOC644039 3143.97163345458 4503.77675488367 4916.82166008511  
3343.07293372655 6873.84878164654 6673.00322263275 3428.74022048394  
5047.91205452316 5601.18872540083 5047.91205452316 5971.45293864208  
6356.05807792831  
LOC644043 42.9104454767916 39.2907645923217 42.5406888281114  
41.4273122914951 43.9450023643394 40.3357777530419 43.8206425661746  
41.7419877611072 42.8036731479932 42.1622837416589 44.3763859390287  
46.917149434588  
LOC644044 44.5282181324797 43.2649781354792 41.2365089689635  
40.5484717678957 41.1868052124344 47.2927436772465 44.3440839686558  
45.642304356051 41.9635525160083 45.0155543555707 41.5421429082231  
42.357910063876  
LOC644045 40.3478825593224 37.920964499903 37.8386378737561  
40.1804147506786 40.4639532172338 38.2293008890613 41.9393838138203  
41.8417024632349 48.1174861108648 37.6383530120621 43.401782064778  
43.6753843488695  
LOC644046 44.9896851005259 40.2493681589104 42.2577689927563  
49.5424425850549 43.9450023643394 39.8455060654531 43.0930293831497  
39.5466975353131 41.2870505273664 44.1379638573455 39.3667161654772  
41.9430737035925  
LOC644047 36.9060997041453 48.4980626712175 40.931294690669  
41.0726336841311 43.7517118200398 44.5544727111028 42.7431359850339  
41.5464765641928 38.9006788676407 44.2580151149956 42.7275315121163  
43.1805016690297  
LOC644048 46.0920218698606 42.6022652963326 48.1997158668729  
48.1662933382789 48.2748123114598 42.9695585740813 47.4439407315335  
45.3872406432794 38.7298222155532 45.9004543328976 43.5710871617107  
43.3744503319109  
LOC644055 46.0920218698606 42.6022652963326 42.3536549114165  
44.550322123994 43.5544347011646 41.554942319225 37.830876898596  
45.9604707098953 43.3744503319109 38.528621456378 40.9157352260901  
42.2577689927563  
LOC644056 44.3355304829989 45.8669209716694 42.4580504587581  
42.9358255168086 39.4693871570028 50.0748292497578 53.3111230705754  
44.293922970134 46.6944238390932 39.5637454855233 44.6286581923295  
46.0633179231318  
LOC644057 48.9906383294199 43.3458769998118 45.310660704531  
47.2009420656854 49.1928206164702 43.7630587657205 52.4111687156893  
42.357910063876 44.8997235283254 43.1839109702714 37.6484782516569  
52.0359304386476

LOC644058 34.0467249875782 35.6434124419782 35.7105247506212  
38.3166554965434 37.956732373465 35.7034203372528 35.9894133432376  
40.831207953647 41.074824727477 37.3179578037963 40.6373400186325  
39.8497227447888

LOC644059 32.821392987958 42.1607322031054 38.7745734037492  
36.5393857306744 34.0045980663271 35.6125439901743 41.1507980856436  
41.4508241771315 46.4861258030402 40.3235655331796 38.6662194645633  
42.4607795638552

LOC644063 134.285947677624 267.85990321012 209.658186168638  
156.08027400493 258.446095955014 254.159017331462 212.090033606355  
115.853867920678 168.388385941598 51.3351387089044 78.6402083787251  
187.957702651679

LOC644064 44.2350046179299 44.9370339275041 41.8751578329365  
48.665578118898 37.8679241954337 43.6670755115848 39.6535880152834  
38.8495095797881 41.2870505273664 39.2623423164488 37.2018803984555  
42.4607795638552

LOC644065 45.3872406432794 40.0527893189096 39.6451483836089  
35.6928955245309 41.6806984441849 38.5252456306656 43.6753843488695  
33.4534810696886 38.3418933808844 40.4136535208406 35.5179217192467  
35.2448979801094

LOC644066 47.7267190613906 42.8542642792862 39.4710743516517  
41.0726336841311 40.6723334103791 39.132725377815 39.4600924554505  
39.0620487644635 45.0997987980157 39.6719190054379 38.956280281655  
45.8546719310325

LOC644068 35.6111578834671 40.9731067463382 38.4043916290561  
38.6414316877471 38.3561682218911 40.7616966228404 39.1539892144371  
41.3506832276112 40.8970401536578 37.5343260962758 36.43924066428  
42.57175366709

LOC644072 43.2724556187214 43.0227387991135 39.991353369336  
37.0732977341185 40.9950639693255 41.0582900711341 35.4623691645629  
35.0510338774593 42.992884918158 41.8613406887824 34.4716904283753  
37.6557714476853

LOC644074 40.6559419616644 41.3610369241157 37.5597671487621  
42.6913548400127 44.0451487108213 43.1826328292558 39.5496902678788  
40.7311497914871 40.4220196471124 40.7063426028871 41.9083581529276  
37.4554876386402

LOC644075 34.0467249875782 33.4967065724734 45.063792968927  
36.0481934423077 47.9128504683618 45.6129956328415 40.9157352260901  
38.6454098044474 39.6609238036815 38.2069499294002 38.6662194645633  
40.0557788909923

LOC644083 37.9387791625384 38.9338521051669 39.7411455670172  
42.0102671859606 44.3557408297309 34.4896350146096 34.1889222434768  
39.0620487644635 39.3750969348308 43.2988017098387 41.3553369544097  
38.745552403895

LOC644086 42.3433931248155 39.4569929845912 41.0752399035779  
43.2427390263564 40.188873541274 39.9763752848782 41.645120086609  
39.700936357233 42.0059135275878 40.3431869033152 39.2907645923217  
37.5236834932416

LOC644087 41.3387790895716 45.7979032939211 39.2707964550441  
41.4273122914951 44.4489662507893 41.9543948167375 37.7136011474903  
38.745552403895 40.8970401536578 38.4187686307607 44.1148826235374  
41.0657892043496

LOC644088 44.2350046179299 42.2577689927563 44.5134109184888  
47.0874209746031 36.4434672195785 43.6670755115848 40.0052661202207

41.5464765641928 37.9273653326866 45.5776159432079 46.0905079010237  
41.7575097298927  
LOC644090 44.6231541342 40.5400384479766 40.4882741869718  
49.1786207920603 39.5595233162192 46.7800033479223 42.7431359850339  
46.2779564481158 42.9020321355927 42.8936990772838 45.2265319826548  
40.5703581862752  
LOC644091 42.3433931248155 39.7835513496873 44.6032218589199  
38.8495095797881 46.4343327861696 46.1513019317765 39.4600924554505  
42.357910063876 43.3744503319109 42.1622837416589 41.4508241771315  
42.0424641526302  
LOC644093 48.1952521496489 43.8845577235486 42.9641759692926  
41.2551966132486 49.0145368354835 41.7256940298128 43.2721716572958  
45.4757965005055 42.8036731479932 53.9918882088235 46.4451625524549  
45.223075311113  
LOC644094 45.1912496459517 46.0023068797812 44.1452943804044  
42.6913548400127 41.467005949568 41.9543948167375 51.9421032049606  
47.3791873993182 46.0106098064475 46.325232414659 42.911855821602  
43.4709415392696  
LOC644096 109.832638804839 102.559678338485 109.738537924214  
97.1271615802556 142.49850553035 120.289145237975 221.049503614433  
135.644934816665 198.979794834746 122.469733727349 136.482957391332  
100.289042948128  
LOC644097 40.2543341073001 40.148780650831 38.6005272730664  
35.6928955245309 37.2567512265363 33.895835691032 49.1067959632109  
40.047314525032 43.0930293831497 40.7063426028871 36.3390947880186  
40.7704587752083  
LOC644098 45.8108990837624 36.9994058279362 37.7384958256497  
40.8681871019812 40.148780650831 39.6251842352088 37.3799542961839  
36.0306975524309 35.7973685350741 41.6373771565199 42.8263096141654  
40.0557788909923  
LOC644099 37.3463875295726 38.1312950900467 42.4580504587581  
47.481302504066 43.004943518025 42.4580504587581 42.0605906240248  
45.2806199505029 38.4344387289956 42.2614524730856 44.2142581488029  
44.0451487108213  
LOC644100 44.2718517563299 42.466333667839 41.6079958749402  
40.4359177791566 44.915045386675 43.3785777889265 43.5627649099623  
42.157627240486 43.3744503319109 41.4397539024976 42.4580504587581  
40.4192415967414  
LOC644105 41.9918605927928 44.0409178714232 42.3887531663733  
44.9370339275041 41.7419877611072 42.6575535390785 43.2721716572958  
41.8417024632349 45.0666179335087 44.3648993568405 43.0710577955487  
45.0035308952466  
LOC644111 44.6231541342 39.2907645923217 39.6451483836089  
40.0698728584484 42.9090346219023 43.9724628401189 36.08956004634  
43.9366081640576 34.7722083264266 41.0057887014368 36.3390947880186  
39.5418280570561  
LOC644112 38.2083710281545 35.5310164682026 38.3166554965434  
35.49696651597 36.7356360093603 39.3841861812262 42.0605906240248  
43.7396619462033 38.4344387289956 40.1179210534118 38.1835938174625  
38.0452862258803  
LOC644113 46.0023068797812 39.6995529770239 45.7968648044613  
42.0102671859606 39.3667161654772 40.5281496800812 45.223075311113  
47.4740726032707 34.9428206949566 43.1839109702714 40.8225507267584  
45.3763275588341

LOC644116 43.1805016690297 41.2598458726002 43.9450023643394  
39.9697332660833 45.8051846088552 41.159706131351 48.3411413510851  
42.0494116081998 41.074824727477 38.0078357808393 44.2925355984056  
42.8864415494484  
LOC644117 50.4872122867759 51.6869155634183 48.9944486068347  
51.5913529948887 44.6834648302383 45.6129956328415 38.1793598983615  
50.857522488428 45.7452456977857 47.8207974930031 46.4205654140754  
45.2783024981315  
LOC644120 45.2875173643252 39.5050383901884 43.1931731665131  
44.1483976313959 41.2740822675592 47.0940613507321 43.5627649099623  
45.4757965005055 39.1790517315259 41.0057887014368 42.4580504587581  
45.6692241948108  
LOC644122 40.8091178323174 39.5637454855233 33.7116090741204  
37.651298468202 40.9950639693255 39.4551617322991 42.1372626664516  
38.079222289614 38.9006788676407 40.4136535208406 39.3086414047188  
42.4607795638552  
LOC644126 34.4896350146096 39.3999056968598 41.0356368374708  
45.0798408927912 39.5595233162192 43.2805590023412 46.7100796279384  
37.2237132058632 48.0163377492228 40.3235655331796 40.1742127891824  
47.3172462673426  
LOC644128 53.2046867327331 52.1967540852276 59.4431489877328  
67.474556589181 49.7235523248653 72.7213787264217 48.9826868640753  
58.4200819624972 56.702421372165 70.8749669449099 86.1055862202537  
62.7669079605627  
LOC644131 51.342502154612 61.1452879517526 53.9256409473463  
54.8412943008635 59.9876575158981 55.3812135024656 46.7100796279384  
55.4919197421746 72.4705793992724 50.7237607003817 55.2893984191264  
63.3578893149245  
LOC644133 45.1912496459517 42.3550738181144 43.3085358214154  
46.1673159982664 52.2089306840125 42.2577689927563 39.1539892144371  
43.7396619462033 38.9834959368496 41.2276963324981 39.0550139257658  
48.9733758107788  
LOC644135 39.0620487644635 39.6123051184545 35.5220586859301  
36.1562979552173 40.9950639693255 39.8455060654531 42.8684958525042  
36.1375121409002 42.5406888281114 43.7303813515864 38.6662194645633  
37.3600014814388  
LOC644136 37.6397652536077 38.2263227947189 43.5710871617107  
42.4580504587581 45.1137938810047 40.650742261428 40.9157352260901  
45.5581356216957 44.2607789091176 43.401782064778 39.3667161654772  
43.1805016690297  
LOC644137 39.7576136507593 39.3999056968598 38.8775560911841  
36.264823544143 41.0885562160946 39.2248354955045 41.706879587091  
35.1738399826814 42.357910063876 43.7303813515864 36.8282383070068  
41.863927676552  
LOC644143 35.0202257459026 38.1312950900467 36.6522278218553  
36.1562979552173 38.4540849632254 39.7394181011603 37.3799542961839  
38.5457716679071 40.5912213523345 41.1222709786153 33.6902293666089  
36.7762265039864  
LOC644144 53.0290605707162 50.4872122867759 42.3536549114165  
61.5515639412892 54.5683518971261 43.7630587657205 55.0897019602305  
57.445796273665 48.3119523820103 50.22432299342 43.4709415392696  
51.3244198342335  
LOC644150 45.5381096166309 44.2428359526953 44.3344900481112  
42.0621425894624 39.9088079891223 47.5216423686268 50.2016912396771



49.085741080241 47.4699236780425 42.4594149893798 41.3234441859498  
52.2243303728305  
LOC644151 100.289042948128 112.100074154279 1537.76265834076  
48.9944486068347 44.8897737954573 51.4931742685391 42.8684958525042  
54.0507720792049 48.0163377492228 856.196444531264 762.855719373733  
405.852280880924  
LOC644152 44.5282181324797 40.8880530359822 42.0621425894624  
43.074472921841 49.1928206164702 40.1428591998404 41.5817737564592  
45.642304356051 39.2809305246091 42.785429206422 46.1673159982664  
41.3481355128089  
LOC644155 48.5835484742456 42.6939394537076 42.157627240486  
51.3851157261451 43.844855336215 44.2607789091176 43.4544762830742  
41.0381860307445 47.5564423692142 46.5650556481721 40.0766543123257  
38.4330755397458  
LOC644157 37.9387791625384 41.9894412416874 39.3709357615493  
36.0481934423077 39.3667161654772 39.6251842352088 41.5817737564592  
44.4031868028216 46.581796165231 43.4885245598939 43.1931731665131  
47.1060577218993  
LOC644162 65.7899239985344 74.4379676234684 67.1299518044849  
79.3066495980045 68.534940191185 103.139459009593 70.4794854241035  
61.3864512710242 67.389417016806 57.3562426592112 66.5539062525344  
70.0335127723592  
LOC644165 40.3478825593224 37.2810767789306 37.2838080935695  
41.1886975241176 41.1868052124344 47.2927436772465 39.4600924554505  
36.7460922671619 40.8970401536578 33.7883338848419 33.9478220100351  
41.5536168238478  
LOC644166 40.5654775358427 39.6995529770239 42.5406888281114  
40.1804147506786 45.3675390992851 39.9397419279057 44.8643898647322  
39.4710743516517 40.5912213523345 46.441301934328 40.547835538778  
41.3481355128089  
LOC644167 48.2910530887214 45.6533175604486 44.6032218589199  
42.5664883002833 38.8456942580061 38.6414316877471 41.8315602975157  
37.33030683349 40.9901805728485 38.2069499294002 39.153226699662  
37.1747156131306  
LOC644168 41.8409927585705 44.2105195734073 44.0451487108213  
41.4273122914951 44.4489662507893 44.0804700754786 43.6753843488695  
41.2551966132486 43.8482802038826 45.1569741609597 41.2598458726002  
42.0424641526302  
LOC644171 39.1590964332473 39.2907645923217 33.1559412791294  
35.3829784221072 44.0451487108213 40.244271403831 42.7431359850339  
37.33030683349 39.4762546236449 38.528621456378 39.4410515050885  
38.745552403895  
LOC644172 47.7267190613906 53.3039668850879 53.1491634301682  
55.4180794172794 50.0173461659833 59.5573227689649 52.3242437351389  
48.6010563649534 50.5785738734431 49.913842155937 51.3103617600342  
55.2449003905956  
LOC644175 41.2424637338424 46.0713306971594 44.1452943804044  
47.8164193292842 43.3332476888305 39.132725377815 45.223075311113  
45.8669209716694 38.9006788676407 41.1222709786153 43.844855336215  
39.2469742642337  
LOC644183 32.5418171758086 37.4540772310118 40.8420925848403  
41.0726336841311 37.2567512265363 39.8455060654531 35.4623691645629  
42.5435283762933 39.1790517315259 38.957687788868 36.131485826118  
44.2527566343661

LOC644184 40.8681871019812 42.3550738181144 44.6032218589199  
41.1886975241176 42.9090346219023 45.0882356578404 43.8206425661746  
40.2382908228517 37.8319142847141 48.4890615340603 41.0050831223107  
40.2669497398702

LOC644187 40.8681871019812 43.5873188565519 42.9104454767916  
48.4916117779992 40.6723334103791 39.8455060654531 48.9826868640753  
43.3262148375525 38.1169703906207 40.6022003765153 38.5668610487033  
41.9430737035925

LOC644188 36.0144420013819 32.2133093774284 34.5718473203083  
34.9221408381038 37.2567512265363 35.314469458379 31.3222361955842  
37.4484310268909 39.5806465938526 36.4651112441576 40.723990462047  
34.9138625012006

LOC644193 47.4678477186801 48.7847528954724 47.2055133646385  
43.074472921841 40.3452320167286 47.2009420656854 46.7100796279384  
46.1673159982664 46.3203995372658 41.5435611403119 47.7535797917441  
43.8575940017119

LOC644195 40.5654775358427 42.6022652963326 45.8844325913247  
53.3967242431461 44.5668141895992 41.3553369544097 47.7390230243778  
50.9933795450314 40.7847110517594 45.0155543555707 40.8225507267584  
37.5556299264699

LOC644196 41.0043775553254 41.1212129940704 37.5222959113204  
42.9358255168086 40.1151953732637 39.2985791324641 41.1507980856436  
40.3691324547049 42.3138951003676 42.8936990772838 38.9240290061433  
39.2839132447749

LOC644197 47.4678477186801 46.3635803515159 38.9790184198145  
45.4634652319753 42.0709558258414 42.2577689927563 46.7100796279384  
47.0940613507321 40.137818555383 46.8954576545929 40.723990462047  
41.0657892043496

LOC644200 41.1523487516364 40.4359177791566 45.2313723727673  
36.5393857306744 43.9450023643394 39.6251842352088 39.0458123429605  
38.4540849632254 48.2123120250343 35.195364621675 43.0016969050339  
38.9496515344837

LOC644201 41.6354649482853 44.0409178714232 38.3166554965434  
41.4273122914951 40.0599807618105 36.6271061451613 40.7910160811527  
35.7973685350741 40.7847110517594 39.2623423164488 44.2142581488029  
35.1451084093692

LOC644204 37.9387791625384 39.7835513496873 39.991353369336  
44.7980740332174 48.7288537840562 41.3553369544097 43.3262148375525  
44.293922970134 44.5303781239209 44.7958122466628 42.6366765186182  
42.0424641526302

LOC644207 42.5193208629123 43.683792219729 39.3709357615493  
48.665578118898 38.6454098044474 37.9951997351435 49.3854238365325  
39.0620487644635 42.2577689927563 44.6918600441328 43.844855336215  
43.3744503319109

LOC644208 35.8208542506595 39.3999056968598 36.178547300352  
35.49696651597 37.4470183315826 34.5886782974123 43.3262148375525  
36.8400213077707 39.1790517315259 40.5090849993014 37.1059647239814  
34.806104801006

LOC644209 38.304249186058 39.5050383901884 33.1559412791294  
39.2780515621926 41.5668884168669 42.157627240486 30.2675713925613  
41.9315419791594 37.5469247328848 43.6033221838149 40.4504608195666  
38.4330755397458

LOC644215 38.5007204246293 32.742439449766 48.0191002461099  
36.5393857306744 40.2449343247539 40.040778349137 38.8417151851134

40.3357777530419 38.6322728994674 42.2614524730856 40.1742127891824  
37.8490162439785  
LOC644222 50.5670783769975 50.8812920005251 47.7737810047679  
54.1240583139871 48.8381507187986 55.1037284831588 48.3411413510851  
47.8947595316832 44.619512785899 45.4614234442527 47.7535797917441  
47.0130468198828  
LOC644224 40.6559419616644 43.1805016690297 42.8270038153139  
42.8235313007746 43.7517118200398 41.0582900711341 41.3594868055879  
43.6434576713809 44.5303781239209 42.9866214102525 45.2265319826548  
41.1554481567603  
LOC644225 45.7356815244513 47.2770121962655 46.2625470410195  
46.3203995372658 48.2748123114598 44.0804700754786 37.2892641289258  
44.6107027295193 41.4636047919453 47.611018474151 40.0766543123257  
42.0424641526302  
LOC644227 39.4710743516517 37.2810767789306 35.2838283525874  
41.5464765641928 37.1565984182084 41.554942319225 37.7136011474903  
37.0390589468421 33.802253812079 36.9102644736882 41.0050831223107  
33.939263369489  
LOC644228 35.5179217192467 46.2286164776607 37.8386378737561  
40.646702696033 40.5710637884029 46.0364000143537 39.6535880152834  
42.2577689927563 43.5669306063196 41.7405682794166 43.401782064778  
35.9604262434141  
LOC644229 39.8662795144616 39.2907645923217 43.401782064778  
38.0958223740111 41.0885562160946 44.0804700754786 40.0052661202207  
42.4580504587581 37.4540772310118 42.0621425894624 40.0766543123257  
45.0985088502363  
LOC644231 43.2724556187214 42.5269793679335 37.1643693306382  
45.5869891570251 37.4470183315826 37.5887129572848 36.9355798143571  
39.3709357615493 39.0775870687758 40.2112371512838 40.8225507267584  
44.2527566343661  
LOC644234 43.5710871617107 41.2598458726002 39.7411455670172  
45.334106390212 40.2449343247539 38.7340969861754 40.4359177791566  
42.2577689927563 41.7627910693483 46.2286164776607 39.9899430628542  
40.8681871019812  
LOC644241 38.5007204246293 38.4330755397458 39.7411455670172  
41.4273122914951 43.7517118200398 39.3841861812262 35.8227939208521  
41.0381860307445 36.6312676076142 44.571915452417 34.8383995317036  
37.1747156131306  
LOC644242 46.7293238583888 42.7775752471711 40.7620472083159  
55.0604256312495 47.4548471240051 44.3648993568405 51.1541843174981  
43.7396619462033 42.4540072551568 38.957687788868 44.9713479185144  
46.2625470410195  
LOC644243 40.7609952437622 42.6022652963326 49.8344973836834  
43.074472921841 44.4489662507893 40.7616966228404 43.5627649099623  
41.3506832276112 40.0403898620771 39.4710743516517 46.0095710163378  
40.7704587752083  
LOC644246 37.1485601150873 39.7835513496873 35.0970060242246  
35.0448343468967 38.8456942580061 38.9378717994178 37.830876898596  
37.33030683349 35.9645119596869 33.6902293666089 29.4322896559759  
38.0452862258803  
LOC644250 388.74199767336 179.064697219173 208.529062113623  
343.139450863356 171.427692959758 135.985408824299 269.284584971871  
706.087945508248 167.273775508231 470.676006277762 520.415257194417  
405.496884468464

LOC644251 37.0320432433314 40.9731067463382 40.6737160001291  
37.4223289687135 45.9104478407175 37.9951997351435 37.9430145836712  
37.6557714476853 35.7973685350741 38.2069499294002 37.9230440150891  
40.2669497398702

LOC644254 42.1537476443423 43.2649781354792 42.2577689927563  
45.1944222548351 39.5595233162192 41.8613406887824 39.8695929627783  
39.9576138799997 43.8482802038826 43.1839109702714 39.5399188536544  
42.2577689927563

LOC644255 42.7150227340364 37.6383530120621 40.4882741869718  
45.0798408927912 40.3452320167286 43.4681646416585 46.8613212048981  
41.5464765641928 45.6582729799009 39.9948390976317 41.9083581529276  
42.2577689927563

LOC644257 37.3463875295726 36.6968906669565 33.9435456570176  
38.745552403895 41.0885562160946 39.4953494583071 37.4772922422734  
36.7460922671619 38.6322728994674 35.3849221682845 37.2892641289258  
39.7411455670172

LOC644262 35.5179217192467 37.8217989841918 38.8775560911841  
46.3203995372658 31.9468644542969 37.7000400506818 43.6753843488695  
34.806104801006 34.7722083264266 44.2580151149956 35.9563099719284  
37.2810767789306

LOC644264 38.6454098044474 43.3458769998118 41.1367478979484  
43.074472921841 36.6354013629791 39.2985791324641 36.7356360093603  
42.4580504587581 42.5406888281114 42.2614524730856 37.3687900733549  
39.1553169409075

LOC644266 44.3355304829989 41.8848959280916 42.5406888281114  
45.5869891570251 41.2740822675592 44.0804700754786 40.3302268293707  
43.6434576713809 46.2027193115397 42.5664883002833 47.3791873993182  
51.6660481331154

LOC644267 39.1590964332473 41.8073910693411 43.0016969050339  
44.7980740332174 42.4864576619427 41.0582900711341 36.7356360093603  
39.0620487644635 38.1169703906207 40.7063426028871 37.1059647239814  
39.1553169409075

LOC644268 35.3227485563945 39.0894172982439 37.2838080935695  
36.7892997857376 47.2074332636566 35.9305494063137 39.6535880152834  
33.7818132446042 37.4540772310118 40.5090849993014 43.401782064778  
32.7800533388945

LOC644276 41.9407041937973 42.2577689927563 40.0998167098057  
51.5913529948887 45.2556760873335 45.1873487463472 50.2016912396771  
49.3880946790306 41.863927676552 44.571915452417 41.0050831223107  
45.8546719310325

LOC644277 46.0023068797812 45.7317208802318 51.5292723244077  
51.223859150798 50.3713170502557 45.2852528185486 43.6753843488695  
38.2782436497441 47.27543600687 42.8936990772838 45.5707650534259  
43.7672102682067

LOC644278 38.7537364570873 43.1805016690297 44.7829632472754  
44.4367387274922 51.6869155634183 44.6524308640784 46.7100796279384  
47.0940613507321 44.1519466943185 44.1379638573455 42.4580504587581  
41.4508241771315

LOC644280 46.7293238583888 45.0115870036541 39.0775870687758  
36.9912468186322 39.0564222526273 38.9378717994178 41.8315602975157  
40.1474543172332 47.4699236780425 38.1042454705119 42.8263096141654  
40.8681871019812

LOC644284 46.9939712192224 48.3699741879723 41.528370959196  
46.4555908533915 53.6907197364586 43.6670755115848 42.7431359850339

34.6977013306396 56.1733549054832 47.611018474151 43.4709415392696  
45.0985088502363  
LOC644285 35.4287975493553 41.6466169548846 35.9305494063137  
44.4367387274922 45.2556760873335 41.7627910693483 41.8315602975157  
45.9604707098953 39.5806465938526 45.1569741609597 38.3684202018524  
39.9519547348106  
LOC644286 41.0608773166058 40.4359177791566 45.2313723727673  
45.0798408927912 41.5668884168669 42.750861693377 41.253645578517  
41.0381860307445 44.8997235283254 46.1390887492649 42.6366765186182  
45.5800840647989  
LOC644288 34.3473914754963 36.1232327599945 38.6727842796202  
40.4359177791566 41.3755760434934 38.5252456306656 36.8369172900902  
34.1806289878747 30.493888765264 38.528621456378 35.2339574411711  
33.2382077236252  
LOC644291 42.6036491382658 42.4493032770053 43.7630587657205  
46.0228732507872 42.0709558258414 43.1826328292558 46.5650556481721  
46.3685439301234 39.853866204927 43.5627649099623 41.9908237694988  
43.9366081640576  
LOC644294 43.9309845324767 38.0226905622357 42.8270038153139  
42.8235313007746 53.3086645804786 36.4986986135769 41.9393838138203  
48.272324215504 38.3418933808844 44.0409178714232 37.6484782516569  
33.0217499673686  
LOC644295 44.1294459089314 44.7829632472754 45.063792968927  
42.8235313007746 45.3675390992851 57.6034762511847 47.5963750520409  
38.1835938174625 44.5303781239209 42.785429206422 41.7272875295469  
49.3984571719129  
LOC644297 45.9090659324223 52.1967540852276 49.5424425850549  
56.0794100106654 48.6224651100733 45.8325181856483 45.223075311113  
62.2982003555312 39.2809305246091 49.7259371799014 47.0110068985119  
58.2251348002272  
LOC644298 41.2424637338424 41.159706131351 37.9482157381008  
41.0726336841311 42.7107928951766 42.750861693377 43.6753843488695  
40.7311497914871 36.3649677956953 40.8049408996274 39.6403089864678  
41.0657892043496  
LOC644299 37.7384958256497 40.9731067463382 45.5883690965192  
41.7614975630362 37.6527901109005 39.2985791324641 40.5585676679482  
39.3709357615493 40.5912213523345 42.0621425894624 42.0750889188255  
44.6484005362281  
LOC644300 48.2910530887214 42.2577689927563 40.4882741869718  
38.745552403895 39.2608760193011 40.244271403831 44.7255207589606  
43.4544762830742 51.1055541075029 41.0057887014368 43.0016969050339  
46.1592873342534  
LOC644302 36.0144420013819 41.8073910693411 31.9895827886879  
38.8495095797881 35.5220586859301 34.7983399096627 36.5352572191451  
36.6452480995946 39.6609238036815 34.3674468322242 35.9563099719284  
33.4316681623175  
LOC644303 41.3387790895716 36.0366673493555 38.7745734037492  
43.9282059368202 39.0564222526273 40.4359177791566 42.4939802311136  
37.86982638952 37.3600014814388 36.6893251782922 34.064698871541  
40.1700117452801  
LOC644305 37.3463875295726 40.716553247236 35.7105247506212  
36.5393857306744 36.8059561571675 33.3470732872681 31.6981395162348  
39.0620487644635 35.6139301508335 37.4302011516587 36.8282383070068  
36.6603338274678

LOC644310 53.3967242431461 65.9098543816057 56.8595344107711  
58.5406981871153 65.5029051840465 49.4157684139858 76.1869593072029  
65.0656365694468 82.3364971911816 51.8412522234186 52.022479439889  
68.6047087267554

LOC644311 41.7397731376692 42.5624638829203 40.3397581924196  
39.5050383901884 39.5595233162192 39.4512099697623 37.4772922422734  
40.047314525032 39.9777866059804 38.4829727716328 35.5395819665562  
40.6614700944853

LOC644313 46.5549623118323 38.2263227947189 39.4710743516517  
39.7411455670172 41.9842695818285 41.7627910693483 41.253645578517  
43.844855336215 37.5469247328848 40.6022003765153 39.153226699662  
37.7526485343328

LOC644316 50.0466349801009 43.3458769998118 46.7508829977587  
52.6947911480086 47.3172462673426 49.7458652239071 48.0283573444179  
50.3082459161777 47.5564423692142 49.3000844711116 48.042366934301  
50.0571060701893

LOC644319 47.2862299990938 42.7775752471711 56.4779645313958  
42.8235313007746 35.9058393060637 43.4681646416585 44.8643898647322  
44.0390019242862 47.27543600687 38.8507804383261 44.4688999098904  
45.4799270968969

LOC644320 41.9407041937973 41.4508241771315 39.5450079747895  
42.357910063876 42.269054475455 40.8634043028528 41.253645578517  
38.745552403895 39.853866204927 44.0409178714232 39.7342718293432  
41.2437378488025

LOC644322 43.8582747295766 48.2870269886682 54.0536858212253  
43.607701594929 48.1473938886239 46.5387044784895 42.6913548400127  
47.6952179922944 52.0228313532986 94.7110944331075 67.2047715601721  
51.0290127884273

LOC644325 39.7576136507593 39.0894172982439 41.785676764591  
48.665578118898 41.6806984441849 43.8582747295766 41.0381860307445  
42.157627240486 42.4540072551568 42.8936990772838 39.3667161654772  
44.8372404608604

LOC644326 44.1294459089314 39.6995529770239 43.4709415392696  
42.6913548400127 42.9090346219023 40.1428591998404 47.1345949868029  
40.1474543172332 40.7847110517594 44.7958122466628 49.1067959632109  
40.9683275553869

LOC644327 46.7293238583888 41.554942319225 44.6032218589199  
41.1886975241176 43.844855336215 41.2567470068038 45.3597029614942  
41.7419877611072 40.2274522635576 44.1379638573455 41.5421429082231  
42.0424641526302

LOC644330 84.9447584832739 90.8188865732032 99.9486407529027  
111.227016020927 79.8331445290301 83.7019398654324 94.5358147295719  
113.860147668006 67.363348155206 40.0514069727124 50.8485682149772  
64.2769859135548

LOC644331 46.3390850717989 42.5269793679335 40.1985790927248  
46.3203995372658 39.7568367479301 45.0882356578404 42.357910063876  
39.5466975353131 39.4762546236449 43.1839109702714 43.9450023643394  
39.4490233720848

LOC644334 49.3463416794995 52.502055890816 48.6037684272115  
41.5464765641928 52.3242437351389 43.1826328292558 48.8319884367456  
43.5544347011646 44.3440839686558 37.920964499903 44.553780984244  
44.1452943804044

LOC644335 42.0532901689036 40.2493681589104 44.4311655729487  
37.5382094267692 42.269054475455 46.574682061365 42.1607322031054

43.5544347011646 42.4540072551568 41.0057887014368 43.5710871617107  
39.6352613956998  
LOC644336 33.2552842693684 38.3322849790657 38.9790184198145  
42.0102671859606 39.0564222526273 39.2985791324641 43.8206425661746  
39.4710743516517 43.6670755115848 34.2638875325204 39.0550139257658  
42.6758568421347  
LOC644338 47.5647821785529 43.683792219729 41.0356368374708  
44.7980740332174 40.148780650831 41.9543948167375 42.357910063876  
40.7311497914871 44.1519466943185 44.7958122466628 43.7585538437696  
44.5432192783161  
LOC644341 34.1336988442837 38.7344853699576 46.6588655218735  
41.3027031037343 44.5668141895992 40.1428591998404 42.8684958525042  
36.7460922671619 45.4799270968969 47.0055981216687 42.2618615571566  
45.0985088502363  
LOC644342 36.1232327599945 37.2810767789306 36.5474283500601  
42.5664883002833 38.3561682218911 37.0180934800573 34.0777108441756  
39.1652965788406 37.9273653326866 38.0078357808393 37.3687900733549  
35.2448979801094  
LOC644343 43.0001432913058 40.716553247236 41.2365089689635  
37.5382094267692 38.8456942580061 40.4359177791566 41.5817737564592  
42.4580504587581 39.5806465938526 38.4187686307607 39.2542963855807  
42.0424641526302  
LOC644345 44.3355304829989 42.9358255168086 40.4070046183108  
40.4359177791566 37.4470183315826 41.4508241771315 40.5585676679482  
38.4540849632254 38.6322728994674 38.3092241935352 36.6298807161755  
36.1647506311964  
LOC644347 39.7576136507593 40.5400384479766 37.0642268327439  
35.314469458379 36.5393857306744 34.5886782974123 31.197411437683  
35.3608605269276 33.1602385985469 31.7992509287736 45.5707650534259  
37.8490162439785  
LOC644348 40.8681871019812 43.7644428186265 42.9104454767916  
39.1706564265495 39.859345745831 40.040778349137 46.9929836306816  
39.9576138799997 40.7847110517594 36.8059561571675 36.5359455830388  
41.2437378488025  
LOC644351 43.5710871617107 44.5884811528117 42.640829914102  
40.3180310664156 37.2567512265363 44.1737502492846 56.6537562775715  
41.5464765641928 47.3791873993182 45.7911932481722 41.1638563416981  
43.7672102682067  
LOC644359 38.8561375693335 42.1607322031054 40.4070046183108  
44.6905691366696 39.1650142708257 44.1737502492846 43.3262148375525  
46.5717043290731 44.7058233759912 46.0119912782855 39.3667161654772  
45.1735152121056  
LOC644360 40.7609952437622 43.1805016690297 45.063792968927  
44.265834798964 37.2567512265363 46.6872654833579 43.9450023643394  
38.8495095797881 37.7384958256497 38.8507804383261 40.547835538778  
44.9070250604284  
LOC644361 35.8208542506595 41.4508241771315 40.0998167098057  
39.853175885492 39.4693871570028 36.9060997041453 35.9894133432376  
41.6466169548846 44.4395580493118 38.4187686307607 32.2133093774284  
40.9683275553869  
LOC644362 44.7915315085948 45.6533175604486 43.9450023643394  
50.2163892855092 41.467005949568 43.4681646416585 42.4939802311136  
46.1673159982664 44.8003345643334 46.1390887492649 43.844855336215  
40.9683275553869

LOC644365 42.9104454767916 41.7337506166619 44.2405728317107  
43.1847628331565 47.0954207417646 39.2248354955045 39.6535880152834  
38.3684202018524 42.992884918158 42.785429206422 41.0808257270221  
40.3691324547049  
LOC644366 37.3463875295726 41.2598458726002 40.8420925848403  
38.4208429103799 40.148780650831 40.8634043028528 43.3262148375525  
44.4031868028216 37.2810767789306 43.4885245598939 41.9083581529276  
42.1537476443423  
LOC644371 38.5007204246293 40.9731067463382 44.696023817801  
42.9358255168086 39.6535880152834 45.1873487463472 48.9826868640753  
44.8997235283254 40.4220196471124 43.4885245598939 38.745552403895  
39.6352613956998  
LOC644372 40.7609952437622 29.5408011993809 36.2683886571585  
39.9697332660833 40.4639532172338 40.040778349137 43.4544762830742  
39.0620487644635 40.8970401536578 38.8507804383261 40.9157352260901  
38.1421709520616  
LOC644373 37.7384958256497 41.3610369241157 42.0621425894624  
43.4410741327254 42.7982502551634 42.4580504587581 41.4742337714895  
44.6107027295193 46.0106098064475 41.2276963324981 44.3763859390287  
41.1554481567603  
LOC644377 40.148780650831 37.5469247328848 41.2365089689635  
48.4916117779992 41.5668884168669 43.8582747295766 40.2154497375715  
37.33030683349 45.4799270968969 43.401782064778 40.6373400186325  
46.7182294568603  
LOC644379 42.1537476443423 44.6918600441328 45.310660704531  
44.550322123994 39.6535880152834 37.1317006162938 39.4600924554505  
44.1311654985682 38.0213051227859 37.920964499903 42.0750889188255  
38.3291713594599  
LOC644380 43.1267841876606 43.3458769998118 43.9243749325976  
51.3851157261451 46.4343327861696 48.7070804960074 49.1067959632109  
42.7431359850339 47.209353240759 47.1785588364488 44.3763859390287  
43.2776458914333  
LOC644386 41.6354649482853 48.109747794187 44.5134109184888  
44.1483976313959 42.9090346219023 39.6251842352088 44.8643898647322  
45.642304356051 46.3203995372658 41.3321861371202 41.9908237694988  
42.4607795638552  
LOC644388 47.4678477186801 43.5873188565519 37.4642807402741  
39.1706564265495 41.467005949568 41.2567470068038 44.7255207589606  
44.293922970134 45.2897806651929 44.6918600441328 39.7342718293432  
43.2776458914333  
LOC644390 41.4508241771315 38.1312950900467 38.0452862258803  
42.5664883002833 37.4470183315826 36.9060997041453 42.1607322031054  
42.7431359850339 59.8158518516035 41.5435611403119 44.2925355984056  
40.2669497398702  
LOC644391 47.6397712007919 39.8695929627783 48.1997158668729  
45.8844325913247 44.4489662507893 57.013135787334 54.339958888486  
44.293922970134 48.8842909466002 51.8412522234186 54.0374522273907  
47.3172462673426  
LOC644396 36.9060997041453 36.1232327599945 44.3344900481112  
48.665578118898 41.3755760434934 38.6414316877471 41.0381860307445  
38.2782436497441 46.7760357462635 45.3530683538086 42.7275315121163  
38.2350720635382  
LOC644399 32.9174234020987 42.9358255168086 36.9795961564828  
39.7411455670172 37.6527901109005 42.157627240486 36.3194282084339



37.1317006162938 40.7847110517594 40.1179210534118 43.5710871617107  
43.5738557773903  
LOC644402 44.1294459089314 38.8336427948187 37.0642268327439  
39.3750969348308 39.1650142708257 39.9397419279057 34.806104801006  
43.844855336215 39.2809305246091 43.1839109702714 43.1931731665131  
39.1553169409075  
LOC644403 43.0930293831497 41.8073910693411 44.9758339877851  
44.9370339275041 42.0709558258414 42.5660695551615 42.9803717121865  
38.3684202018524 43.7630587657205 42.785429206422 39.153226699662  
38.8495095797881  
LOC644404 40.0557788909923 35.2143190355414 32.2796484885898  
32.0298369224145 46.3150221024046 38.9378717994178 37.4772922422734  
43.5544347011646 38.4344387289956 45.1569741609597 36.2435874904689  
39.5418280570561  
LOC644408 40.6559419616644 39.5050383901884 33.4240466670776  
37.4223289687135 36.5393857306744 37.1317006162938 32.9962272670005  
35.9023742468744 30.493888765264 38.745552403895 35.6970528713709  
40.2669497398702  
LOC644411 45.5758521267508 43.0971787292711 44.2405728317107  
40.646702696033 40.148780650831 45.4882438975269 39.0458123429605  
45.1714698794331 41.5635499110307 35.8304004211528 40.547835538778  
50.2163892855092  
LOC644412 41.3387790895716 42.2577689927563 40.5734458834617  
33.6816578730693 40.9950639693255 36.2015763253919 37.830876898596  
39.4710743516517 36.2733735494625 38.957687788868 37.4642807402741  
40.8681871019812  
LOC644413 38.1169703906207 37.2810767789306 39.3709357615493  
40.646702696033 42.4864576619427 34.5886782974123 40.7910160811527  
36.7460922671619 40.0403898620771 42.4594149893798 38.2795150354677  
40.1700117452801  
LOC644419 37.7384958256497 40.0527893189096 40.931294690669  
35.1451084093692 41.0885562160946 42.357910063876 37.9430145836712  
43.5544347011646 39.853866204927 42.9866214102525 43.7585538437696  
44.8372404608604  
LOC644420 41.1523487516364 40.2493681589104 38.5045333213784  
34.9221408381038 35.3327761997046 36.9060997041453 37.830876898596  
35.9023742468744 35.860430241131 37.1275334308172 37.0180934800573  
33.8196020406676  
LOC644421 45.3872406432794 44.5152708955623 49.7350276169552  
59.6153684374766 41.6806984441849 46.8954576545929 43.8206425661746  
51.6660481331154 45.2897806651929 47.9056710878325 47.4630625313159  
44.4475838947656  
LOC644422 67.3816715975056 109.943883439481 68.878562323012  
65.7321440516177 73.8800799416166 55.7868713984479 66.9020790116382  
69.2963913574682 103.063302515808 50.294087888475 53.8499082625091  
114.437872597779  
LOC644423 42.0532901689036 37.2810767789306 47.9035532886869  
40.5484717678957 45.9104478407175 43.6670755115848 46.3057385979341  
46.9986083378817 40.7847110517594 43.7303813515864 49.2206713037152  
41.6550823405646  
LOC644424 44.0328992213727 49.4982025424177 45.6989664108554  
55.6481366056639 52.0583273941813 47.3791873993182 51.0013344286851  
52.0503062610092 47.798305839406 47.9056710878325 47.5439485437351  
46.1592873342534

LOC644427 37.7384958256497 45.9266745571724 39.3709357615493  
44.1483976313959 45.6895223823001 38.6414316877471 40.4359177791566  
44.797320243931 39.9444191873552 38.8507804383261 42.4580504587581  
40.6614700944853

LOC644429 37.8386378737561 41.6466169548846 44.3344900481112  
44.4367387274922 42.9090346219023 41.4508241771315 52.2476631126873  
38.745552403895 45.9227107476843 44.2580151149956 43.5710871617107  
38.3291713594599

LOC644431 40.8681871019812 38.8336427948187 43.9450023643394  
43.4410741327254 42.6022652963326 38.9378717994178 48.9826868640753  
40.7311497914871 41.6616444147804 48.7414853386615 48.5292718280498  
43.1805016690297

LOC644433 34.5886782974123 44.6918600441328 44.0451487108213  
39.1706564265495 46.4343327861696 45.1873487463472 38.2933870238743  
36.8400213077707 37.7384958256497 40.4136535208406 38.3684202018524  
40.4639532172338

LOC644436 32.742439449766 35.9305494063137 43.1931731665131  
40.0698728584484 42.0709558258414 34.4896350146096 41.706879587091  
34.4896350146096 41.3803269429468 38.745552403895 36.6298807161755  
39.2469742642337

LOC644444 45.0985088502363 41.8073910693411 43.401782064778  
40.5484717678957 38.1644569189523 40.650742261428 41.8315602975157  
37.33030683349 38.9834959368496 42.8936990772838 38.8507804383261  
35.9604262434141

LOC644447 42.7150227340364 45.7979032939211 42.5406888281114  
36.890925044696 43.3332476888305 41.159706131351 41.3594868055879  
46.5717043290731 40.7847110517594 40.7063426028871 39.7342718293432  
39.0536056496869

LOC644450 45.1912496459517 44.0409178714232 38.8775560911841  
42.357910063876 51.3511088648386 48.9826868640753 46.8613212048981  
44.797320243931 40.9901805728485 49.7259371799014 48.3847843498476  
47.2131144508464

LOC644452 55.0078788655089 41.8848959280916 41.6079958749402  
39.7411455670172 46.9906120932727 47.6803619768589 38.2933870238743  
43.1567024035183 43.4656637536244 44.1379638573455 42.0750889188255  
38.9496515344837

LOC644457 41.6354649482853 39.5050383901884 44.2405728317107  
44.9370339275041 44.7829632472754 41.2567470068038 48.0283573444179  
43.0390857698452 44.8003345643334 38.3092241935352 40.0766543123257  
43.5738557773903

LOC644466 44.2350046179299 46.6314009405034 31.7645650530049  
40.7481155008596 81.0259717888094 38.5252456306656 48.9826868640753  
35.5798430594271 42.357910063876 39.3698811593364 36.43924066428  
35.4484652445078

LOC644468 41.0608773166058 41.8073910693411 36.5474283500601  
38.745552403895 41.9842695818285 36.6271061451613 38.1793598983615  
40.2382908228517 39.6609238036815 34.3674468322242 41.2598458726002  
33.1559412791294

LOC644472 35.8208542506595 44.3529919625344 33.0260566875355  
32.2212308728305 41.6806984441849 37.4782441311626 40.2154497375715  
35.5798430594271 40.2274522635576 32.6203270051744 33.8558232866797  
41.1554481567603

LOC644473 42.6036491382658 43.683792219729 44.4311655729487  
44.7980740332174 40.0599807618105 41.0582900711341 50.5252048155459

43.6434576713809 45.4799270968969 43.844855336215 42.357910063876  
40.6614700944853  
LOC644474 36.7356360093603 41.554942319225 43.5710871617107  
39.853175885492 38.9496515344837 46.1513019317765 41.0381860307445  
38.2782436497441 37.6383530120621 37.7315666632629 37.5583886316038  
38.9496515344837  
LOC644477 39.7576136507593 42.8542642792862 42.5406888281114  
39.2780515621926 37.7576900881741 40.4359177791566 39.1539892144371  
38.745552403895 43.6670755115848 43.401782064778 42.8263096141654  
39.7411455670172  
LOC644479 48.1952521496489 41.7337506166619 40.301483914446  
34.2080003860523 39.1650142708257 42.6575535390785 36.197424053556  
45.7476095696859 43.0930293831497 43.401782064778 41.0050831223107  
38.1421709520616  
LOC644480 42.2455707947223 39.1982470626863 41.785676764591  
39.5050383901884 42.9090346219023 46.0364000143537 40.0052661202207  
46.4672637826582 37.9273653326866 43.844855336215 45.6348103033479  
38.0452862258803  
LOC644482 49.7827734675743 40.2493681589104 42.7303139017786  
45.0798408927912 49.452985143568 49.8472708021525 39.2533668167483  
48.5681478665796 53.3932110698117 54.4825201506931 47.6125796208753  
46.8129509799753  
LOC644484 36.9060997041453 34.9262464079777 39.991353369336  
37.1894304543751 41.7929491793697 37.2686490268265 41.0381860307445  
38.6454098044474 36.8127605061228 38.528621456378 40.2649309204478  
37.8490162439785  
LOC644489 38.7537364570873 40.7952353240579 38.8775560911841  
42.1273928203021 37.8679241954337 35.6125439901743 32.1218888714537  
45.1714698794331 39.5806465938526 44.2580151149956 39.6403089864678  
36.7762265039864  
LOC644491 50.7390160399184 44.2105195734073 48.7039705048129  
43.3078542962968 54.6820069269589 49.8472708021525 49.8281348927244  
50.3972033014227 45.4799270968969 43.844855336215 47.0110068985119  
41.7575097298927  
LOC644499 48.4849194706125 40.148780650831 44.0451487108213  
48.309866878365 40.6723334103791 34.3887641786747 42.357910063876  
44.9977782988116 41.2870505273664 38.4187686307607 46.0905079010237  
48.5123041297835  
LOC644500 42.5193208629123 43.0227387991135 42.2577689927563  
38.6414316877471 43.4544762830742 41.7627910693483 52.2476631126873  
46.3685439301234 41.5635499110307 40.8970401536578 46.7386599624801  
46.6397391251762  
LOC644504 40.5654775358427 41.9894412416874 39.991353369336  
39.9697332660833 40.6723334103791 40.040778349137 38.941855825269  
39.9576138799997 42.992884918158 40.6022003765153 38.6662194645633  
39.7411455670172  
LOC644507 37.9387791625384 39.6123051184545 33.0260566875355  
36.3604951341921 37.956732373465 38.6414316877471 46.8613212048981  
35.6825474397235 36.6312676076142 35.8304004211528 42.6366765186182  
37.8490162439785  
LOC644508 42.8036731479932 38.6414316877471 32.6121532029976  
38.4208429103799 39.9697332660833 39.9397419279057 43.5627649099623  
38.5457716679071 35.9645119596869 37.4302011516587 37.2892641289258  
39.7411455670172

LOC644511 809.577874019028 1445.73674428909 1580.58484708669  
1339.29022988209 2146.1548633579 2545.03032507597 1094.91235708087  
1630.25992078321 1749.06320703181 2018.28984520892 1896.06380611235  
2009.75680599899

LOC644512 36.3649677956953 40.8880530359822 42.2577689927563  
40.4359177791566 38.1644569189523 44.1737502492846 40.7910160811527  
44.7044140979108 47.4699236780425 43.0919221375514 38.3684202018524  
37.5556299264699

LOC644516 43.0001432913058 41.9894412416874 39.7411455670172  
43.9282059368202 44.8897737954573 41.4508241771315 46.4388841354122  
43.5544347011646 40.3316153483289 41.8613406887824 40.2649309204478  
41.7575097298927

LOC644519 38.0089018744739 38.8336427948187 37.8386378737561  
47.6687908290818 41.7929491793697 44.1737502492846 36.9355798143571  
41.3506832276112 53.0357938671646 41.8613406887824 40.3452320167286  
39.4490233720848

LOC644524 42.1537476443423 40.2493681589104 43.0016969050339  
45.4634652319753 44.7829632472754 40.4359177791566 44.3440839686558  
39.6474008369935 38.1169703906207 34.1648535095605 44.7926323492519  
35.2448979801094

LOC644528 42.3433931248155 39.0102066700839 43.6670755115848  
49.7350276169552 40.5710637884029 42.4580504587581 42.9803717121865  
37.6557714476853 51.0062122023297 46.8954576545929 41.2598458726002  
49.3087627580849

LOC644530 45.9090659324223 46.1569135229922 42.0621425894624  
47.9915414951747 46.4343327861696 43.4681646416585 48.8319884367456  
39.7509165247419 44.4395580493118 45.0155543555707 39.5399188536544  
44.3521099857368

LOC644532 41.1523487516364 42.0709558258414 40.5734458834617  
58.0218262176065 50.8875036861067 44.4619248757502 39.0458123429605  
36.43924066428 45.8325181856483 38.4187686307607 40.9157352260901  
40.0557788909923

LOC644536 43.7585538437696 39.2907645923217 40.4070046183108  
39.3750969348308 45.2556760873335 49.7458652239071 40.7910160811527  
42.5435283762933 41.9635525160083 39.0648733099061 39.5399188536544  
46.3411353377615

LOC644537 41.1523487516364 39.0894172982439 45.7968648044613  
48.1662933382789 45.8051846088552 44.0804700754786 42.357910063876  
42.0494116081998 43.7630587657205 43.4885245598939 40.0766543123257  
46.3411353377615

LOC644538 36.7356360093603 43.5182502375207 36.3604951341921  
34.7266486944713 43.6587492470348 46.3715909653832 45.4799270968969  
37.33030683349 40.7847110517594 38.1042454705119 43.1931731665131  
38.8495095797881

LOC644539 39.6609238036815 42.3550738181144 44.8872784170036  
37.9875302985336 42.1650127805175 38.1169703906207 49.540449125788  
37.86982638952 40.4220196471124 40.1179210534118 39.5399188536544  
37.8490162439785

LOC644544 46.0920218698606 41.7337506166619 50.0050760710506  
58.7338159410728 55.1563703466328 41.554942319225 51.0013344286851  
43.6434576713809 48.9931786790166 49.5265949137207 47.1477056711335  
42.1537476443423

LOC644548 45.1648925137409 41.9894412416874 44.014441886238  
47.27543600687 44.4489662507893 42.357910063876 42.8684958525042

42.9301944191913 42.4540072551568 40.7620472083159 42.5426057453993  
41.9430737035925  
LOC644554 39.3709357615493 35.0222940937513 41.3366779545815  
41.0726336841311 40.8873907150245 38.9378717994178 37.830876898596  
38.1835938174625 42.6366765186182 41.5435611403119 38.2795150354677  
40.5703581862752  
LOC644556 38.5648843914189 46.6314009405034 42.3536549114165  
42.0102671859606 36.9702228618069 36.8059561571675 42.7431359850339  
38.745552403895 41.9635525160083 41.2276963324981 39.9899430628542  
38.3291713594599  
LOC644558 44.3355304829989 46.3635803515159 45.5883690965192  
41.5464765641928 40.8873907150245 51.702461863489 45.3597029614942  
44.6107027295193 49.2879849674517 45.5776159432079 43.1931731665131  
45.5800840647989  
LOC644567 40.0557788909923 40.6380495994768 41.437237454134  
41.0726336841311 44.2607789091176 47.0027453663546 41.5817737564592  
41.6466169548846 39.6609238036815 43.6033221838149 42.0750889188255  
38.6454098044474  
LOC644569 36.3649677956953 37.10170285405 40.7620472083159  
41.8778873678551 36.08956004634 40.7616966228404 36.7356360093603  
39.7509165247419 36.7267557061938 42.2614524730856 32.9879066304034  
35.4484652445078  
LOC644571 40.8681871019812 49.2050538150106 44.2405728317107  
36.9912468186322 46.3150221024046 38.7340969861754 39.6535880152834  
37.7612949798895 43.1805016690297 50.1649089793069 39.6403089864678  
44.2527566343661  
LOC644573 33.6902293666089 40.3384318592985 36.6522278218553  
36.5393857306744 39.0564222526273 40.9506062495231 44.8643898647322  
38.745552403895 39.0775870687758 39.4710743516517 38.5668610487033  
46.8129509799753  
LOC644574 41.9407041937973 44.5884811528117 41.8751578329365  
39.5050383901884 38.5512429290626 38.1169703906207 37.830876898596  
37.1317006162938 38.6322728994674 47.611018474151 38.1835938174625  
35.8429598823818  
LOC644577 45.0985088502363 33.8237407699472 46.2625470410195  
43.1847628331565 40.5710637884029 39.2248354955045 38.7337086062875  
38.4540849632254 40.7847110517594 42.785429206422 39.0550139257658  
40.4639532172338  
LOC644578 43.6706764143908 45.2556760873335 42.8270038153139  
42.0102671859606 44.6834648302383 40.7616966228404 45.7452456977857  
39.9576138799997 46.0106098064475 48.1392888470269 43.3085358214154  
41.6550823405646  
LOC644580 34.9138625012006 31.1853651446075 37.8386378737561  
35.3829784221072 35.1411239266238 42.157627240486 36.3194282084339  
38.956280281655 45.7452456977857 37.0320432433314 38.8507804383261  
39.5418280570561  
LOC644584 62.5528124447176 93.2133061608764 85.7111041637416  
81.0057400164851 91.4121563150184 76.4439037944547 80.7563265626648  
54.3820590274321 83.0534943004588 53.4109882045447 58.0800636554122  
58.9836017745712  
LOC644586 42.1537476443423 36.89524015739 37.9482157381008  
41.3027031037343 43.844855336215 39.2985791324641 42.357910063876  
44.293922970134 38.0213051227859 42.5664883002833 34.6366195121669  
44.8372404608604

LOC644590 118.49449420132 153.626578526803 80.1665291227124  
98.9560329133205 115.132600341395 67.1729762600915 106.226670314211  
126.038716672534 151.686513723244 75.4392126686957 66.3481553496766  
56.8534370691413  
LOC644591 42.6575535390785 45.6948619492056 41.0718387273629  
43.607701594929 43.7783560914188 41.3553369544097 43.6753843488695  
48.9826868640753 41.7627910693483 44.4294261786154 44.7926323492519  
46.5650556481721  
LOC644592 38.7537364570873 38.2263227947189 41.785676764591  
39.7411455670172 43.004943518025 45.8325181856483 39.1539892144371  
39.2672712041774 43.5669306063196 43.401782064778 41.1638563416981  
39.4490233720848  
LOC644593 39.266565827316 37.2810767789306 45.989212296035  
38.745552403895 40.9950639693255 38.7340969861754 43.4544762830742  
36.3405039629059 36.4476883897928 41.4397539024976 37.5583886316038  
41.5536168238478  
LOC644596 40.4639532172338 42.1607322031054 42.3536549114165  
39.7411455670172 43.6587492470348 44.2607789091176 42.1607322031054  
49.085741080241 44.0519245668737 44.4652605017595 48.2050207071554  
47.1060577218993  
LOC644598 39.6609238036815 42.4493032770053 39.9101908547397  
44.1483976313959 42.7107928951766 40.244271403831 50.2016912396771  
42.157627240486 44.8003345643334 45.7911932481722 43.401782064778  
36.449101775775  
LOC644599 47.3791873993182 47.3536182445315 44.0451487108213  
45.7397504535169 42.4864576619427 42.5660695551615 42.7431359850339  
41.9315419791594 43.1805016690297 42.5664883002833 41.8168470823451  
40.6614700944853  
LOC644602 44.8914371498528 44.6918600441328 38.6005272730664  
45.1944222548351 41.7929491793697 41.6590564937735 43.1931731665131  
41.9315419791594 40.0403898620771 43.1839109702714 50.3221380889396  
44.1452943804044  
LOC644607 45.5758521267508 40.0527893189096 45.7968648044613  
40.8681871019812 42.1650127805175 37.9951997351435 45.7452456977857  
48.1591264215184 43.9450023643394 42.785429206422 42.4580504587581  
38.8495095797881  
LOC644611 34.0467249875782 37.7384958256497 37.2838080935695  
43.6726153508978 39.7568367479301 42.5660695551615 40.2154497375715  
40.1474543172332 40.6957787921451 41.4397539024976 41.7272875295469  
40.7704587752083  
LOC644612 48.1952521496489 229.26498093497 42.5406888281114  
45.1944222548351 49.8304479381623 45.8325181856483 123.561242462957  
53.2046867327331 365.401746744015 47.0055981216687 48.4717951775049  
54.3587260982091  
LOC644613 41.9407041937973 34.15544299189 34.9849896310235  
40.8681871019812 35.2163900400329 37.7000400506818 38.4005795891396  
34.1806289878747 35.7973685350741 35.93950183586 40.6373400186325  
32.7800533388945  
LOC644615 187.422036538629 117.3417887148 210.605371352247  
214.732968482214 124.204392146484 159.937192675974 108.945545005203  
218.354538624978 137.395516155158 125.512567429299 121.729442469889  
172.540737848092  
LOC644617 44.7044140979108 44.4411734611229 44.8872784170036  
38.4208429103799 46.8674366115656 46.0364000143537 38.1793598983615

52.3068458655445 45.0997987980157 39.0648733099061 49.319499137678  
41.7575097298927  
LOC644621 44.436995101921 44.5884811528117 44.2405728317107  
40.8681871019812 42.269054475455 31.6419446793642 40.5585676679482  
39.0620487644635 43.1805016690297 40.2112371512838 39.4410515050885  
36.7762265039864  
LOC644623 40.0557788909923 37.7634062597747 39.0470836345045  
42.0621425894624 43.2855454938964 39.2985791324641 41.768427504666  
40.2798627005118 39.4433784795209 41.2651195687914 41.8168470823451  
40.7281925055215  
LOC644624 43.5091313212877 42.810624012519 43.6670755115848  
41.3567204694281 44.5092684716474 47.0335687822374 42.22763273471  
43.5752393599169 47.4979516960644 43.7303813515864 43.0622091462446  
44.1943947917917  
LOC644625 46.0920218698606 49.2934904960601 44.9758339877851  
42.4580504587581 45.5809132232681 50.9724155054821 49.2546642180676  
43.2551508830106 46.4164127487052 46.5650556481721 48.8744644207821  
51.2318935933116  
LOC644628 42.9104454767916 47.4076235350059 45.989212296035  
44.1483976313959 42.7982502551634 52.3187919317561 45.1017494688414  
42.157627240486 43.3744503319109 43.2988017098387 43.5710871617107  
42.0424641526302  
LOC644629 46.8141313516997 42.4493032770053 45.310660704531  
38.9534635879195 38.2496050953547 48.260931742163 41.1507980856436  
43.1567024035183 39.4762546236449 43.1839109702714 44.6286581923295  
49.7336769474446  
LOC644631 40.0557788909923 48.3077814647455 44.9758339877851  
41.5464765641928 45.3675390992851 50.7516773099639 44.4639405506967  
42.5435283762933 45.2897806651929 43.9450023643394 45.2265319826548  
45.2783024981315  
LOC644634 59.1311136551108 47.8020258652388 50.4778868815688  
50.2950101030503 45.2556760873335 52.6631075917563 41.4397539024976  
47.3791873993182 51.1055541075029 50.7123337699567 59.1443775199516  
51.2796327239617  
LOC644635 41.5421429082231 36.89524015739 40.301483914446  
38.3166554965434 41.3755760434934 41.6590564937735 53.3111230705754  
41.6466169548846 42.357910063876 42.4594149893798 39.9899430628542  
42.6758568421347  
LOC644638 48.6621527194963 45.8669209716694 45.7968648044613  
46.4555908533915 41.8806343997257 46.8954576545929 44.4639405506967  
42.0494116081998 47.7086093893038 50.0564735608363 43.0016969050339  
45.4799270968969  
LOC644640 43.5710871617107 38.6414316877471 41.6977706798234  
42.9358255168086 48.3814421939888 45.9266745571724 45.223075311113  
42.5435283762933 51.1055541075029 47.9056710878325 48.1352470945488  
42.7782216342806  
LOC644641 42.7150227340364 46.1569135229922 43.6670755115848  
40.646702696033 39.2608760193011 43.7630587657205 46.8613212048981  
41.8417024632349 41.1742244762318 42.6793753550854 42.4580504587581  
46.1592873342534  
LOC644642 138.82907142482 54.4793574349739 59.6565330440648  
108.330778160202 62.3233491851723 64.0985088513857 77.5813459454823  
149.02612008344 54.4059109100338 114.533239859288 113.726153436343  
78.2644076847509

LOC644644 51.413025495745 46.6314009405034 48.7039705048129  
48.4916117779992 47.4548471240051 50.4022543872993 56.0515443021293  
42.9301944191913 44.8997235283254 46.325232414659 49.5923712603197  
46.8129509799753  
LOC644646 41.7397731376692 39.2907645923217 41.6977706798234  
41.6564075217517 41.6806984441849 39.3841861812262 41.1507980856436  
39.5466975353131 43.2761454096265 39.9948390976317 40.1742127891824  
41.5536168238478  
LOC644647 39.5676051939342 37.10170285405 42.157627240486  
42.2496337895968 44.5668141895992 35.5158505219112 43.5627649099623  
41.7419877611072 38.6322728994674 46.0119912782855 35.4386677371439  
35.1451084093692  
LOC644650 38.7537364570873 39.3999056968598 38.2280071951674  
41.8778873678551 34.3633615460307 43.7630587657205 37.3799542961839  
36.43924066428 37.8319142847141 35.2880714952489 45.1432412071268  
36.3454320848591  
LOC644652 47.2862299990938 44.1239711172417 44.5134109184888  
41.7614975630362 47.2074332636566 41.159706131351 41.8315602975157  
38.079222289614 41.5635499110307 43.1839109702714 43.401782064778  
41.1554481567603  
LOC644655 39.3709357615493 42.3550738181144 38.7745734037492  
37.29566077996 42.6022652963326 30.8824580894159 33.4316681623175  
36.1375121409002 35.1155486926999 34.3674468322242 36.8282383070068  
35.9604262434141  
LOC644656 36.2496364442264 40.5400384479766 36.6522278218553  
38.5252456306656 35.7973685350741 41.159706131351 38.0598374201407  
38.1835938174625 32.2545725371494 34.9138625012006 36.131485826118  
40.3691324547049  
LOC644658 37.9387791625384 39.0894172982439 38.2280071951674  
42.2496337895968 37.3508690072156 45.9266745571724 46.5650556481721  
38.956280281655 41.1742244762318 39.7835513496873 41.4508241771315  
43.8575940017119  
LOC644662 39.4710743516517 40.931294690669 42.785429206422  
42.9358255168086 43.7783560914188 43.5416683728269 45.8311458106942  
42.6022652963326 44.7058233759912 43.6670755115848 41.6336636285875  
45.4799270968969  
LOC644663 43.6706764143908 41.554942319225 38.6727842796202  
43.3078542962968 44.147557390293 46.1513019317765 44.4639405506967  
43.7396619462033 40.5912213523345 45.3530683538086 38.2795150354677  
43.8575940017119  
LOC644666 48.0201377454632 49.1283590719461 51.7138050344355  
46.4555908533915 52.5645416722441 49.1013967533186 48.3411413510851  
47.2009420656854 49.7336769474446 58.3813211109331 43.0971787292711  
50.0571060701893  
LOC644668 37.3463875295726 39.0102066700839 40.301483914446  
43.074472921841 37.8679241954337 39.0266821712099 39.6535880152834  
34.1806289878747 36.0741672064298 34.5718473203083 39.0550139257658  
41.2437378488025  
LOC644669 39.8662795144616 38.1312950900467 42.8270038153139  
43.5627649099623 40.148780650831 38.2293008890613 36.634024014558  
37.7612949798895 41.9635525160083 41.9666541498638 38.079222289614  
42.1537476443423  
LOC644670 47.7267190613906 94.3773551105819 51.5292723244077  
49.7350276169552 49.0828761839116 45.7300501624017 56.2181240696479



96.0654949568324 63.2753814090696 53.5498255316009 52.5930185400362  
53.840976437122  
LOC644672 42.9104454767916 40.148780650831 42.157627240486  
41.8778873678551 36.5393857306744 37.5887129572848 41.253645578517  
43.1567024035183 36.3649677956953 38.6454098044474 34.4716904283753  
41.2437378488025  
LOC644677 49.9419897484381 45.2556760873335 39.7411455670172  
43.074472921841 42.269054475455 43.1826328292558 38.0598374201407  
36.1375121409002 40.0403898620771 46.0119912782855 49.3901004211918  
37.1747156131306  
LOC644679 47.5647821785529 44.1239711172417 46.5650556481721  
53.0284011078097 42.9090346219023 49.1013967533186 42.8684958525042  
44.797320243931 47.27543600687 53.1993028936883 43.3085358214154  
46.4499258373233  
LOC644680 43.2724556187214 41.2598458726002 43.1931731665131  
37.5382094267692 43.2484996523549 39.9397419279057 38.1793598983615  
38.3684202018524 44.4395580493118 43.9450023643394 40.6373400186325  
43.0930293831497  
LOC644681 41.5421429082231 40.7952353240579 44.696023817801  
40.3180310664156 43.4544762830742 42.5660695551615 42.1607322031054  
41.6466169548846 43.1805016690297 42.3606390470387 37.1059647239814  
50.656598108034  
LOC644682 45.9090659324223 43.8495248991589 35.6139301508335  
40.4359177791566 40.4639532172338 41.159706131351 40.6750540874299  
36.3405039629059 36.5393857306744 38.4187686307607 41.4508241771315  
39.6352613956998  
LOC644683 44.5282181324797 43.7644428186265 44.7829632472754  
40.4359177791566 43.004943518025 41.159706131351 37.2892641289258  
35.1738399826814 45.3756389170606 43.6033221838149 39.6403089864678  
43.4709415392696  
LOC644686 47.3791873993182 45.3486182278177 42.4580504587581  
44.265834798964 53.6907197364586 52.8421046802739 46.0228732507872  
49.085741080241 50.401623258584 41.8613406887824 40.1742127891824  
47.0130468198828  
LOC644689 40.148780650831 40.716553247236 41.785676764591  
46.0228732507872 44.9936360641969 42.750861693377 39.7576136507593  
39.7509165247419 43.1805016690297 44.3648993568405 43.7585538437696  
42.1537476443423  
LOC644690 46.1673159982664 45.3486182278177 42.3536549114165  
36.890925044696 38.8456942580061 47.9503724044453 39.5496902678788  
33.4534810696886 44.5303781239209 51.7594352155304 39.153226699662  
37.7526485343328  
LOC644694 45.0985088502363 48.4980626712175 49.8344973836834  
51.7739270955254 51.940083408061 52.8421046802739 50.5252048155459  
49.2901038327894 52.5772854102326 48.9826868640753 48.2910530887214  
49.3087627580849  
LOC644695 40.7609952437622 44.2630383225933 36.1042012504758  
36.1562979552173 41.5668884168669 34.4896350146096 63.0119737420787  
42.7431359850339 87.2282539094452 83.0700092537618 66.9494774452406  
69.8505620106065  
LOC644701 39.3709357615493 32.8881500803623 39.3709357615493  
41.8778873678551 31.9468644542969 39.0266821712099 34.1889222434768  
33.9687743313429 33.4698406117406 28.3262844159644 32.2133093774284  
31.1733235029813

LOC644704 50.5670783769975 42.5269793679335 41.8751578329365  
42.0102671859606 37.7576900881741 36.2015763253919 39.2533668167483  
38.3684202018524 39.5806465938526 39.5637454855233 41.7272875295469  
38.8495095797881

LOC644705 42.7150227340364 40.0527893189096 39.9101908547397  
49.7350276169552 39.3667161654772 40.5281496800812 42.7431359850339  
40.1474543172332 40.4220196471124 35.3849221682845 43.4709415392696  
42.57175366709

LOC644707 51.1740855632044 43.0227387991135 48.8941062980393  
43.6726153508978 42.269054475455 42.357910063876 40.3302268293707  
41.7419877611072 43.3744503319109 43.4885245598939 46.3370338074996  
45.0985088502363

LOC644710 47.1962846565261 42.4493032770053 44.3344900481112  
45.8844325913247 41.1868052124344 40.040778349137 52.0942589368478  
44.2159020605784 49.0986627051784 38.6454098044474 42.2618615571566  
41.7575097298927

LOC644711 43.2724556187214 43.2649781354792 46.7508829977587  
43.3078542962968 43.4544762830742 44.3648993568405 47.7390230243778  
43.5544347011646 44.0519245668737 40.6022003765153 40.2649309204478  
39.3575468494941

LOC644714 39.0325254636537 40.8880530359822 41.467005949568  
43.4933087941017 43.3832826368789 42.9090346219023 41.7656868106485  
40.2906799807722 39.853866204927 37.920964499903 40.4504608195666  
43.3744503319109

LOC644715 47.4678477186801 43.4396866157171 39.991353369336  
40.0698728584484 44.6834648302383 40.650742261428 36.9355798143571  
39.4710743516517 46.6944238390932 43.6033221838149 43.7585538437696  
42.2577689927563

LOC644717 41.9407041937973 42.4493032770053 47.9035532886869  
46.3203995372658 49.452985143568 43.7630587657205 45.4799270968969  
40.6171774724171 50.3245489035833 41.6373771565199 40.2649309204478  
40.9683275553869

LOC644719 44.2350046179299 40.0527893189096 45.7968648044613  
43.5627649099623 40.9950639693255 42.4580504587581 46.1634822993009  
45.8669209716694 43.4656637536244 39.7835513496873 39.153226699662  
40.2669497398702

LOC644725 43.3638918705225 38.4330755397458 37.9482157381008  
33.5578650644246 46.5557478175976 42.357910063876 41.8315602975157  
43.1567024035183 40.137818555383 43.6033221838149 41.2598458726002  
40.5703581862752

LOC644727 39.6609238036815 37.7384958256497 43.401782064778  
41.8778873678551 44.4489662507893 41.159706131351 43.8206425661746  
37.4484310268909 41.2870505273664 41.2276963324981 40.4504608195666  
46.5650556481721

LOC644732 40.2543341073001 34.0382693188794 37.5597671487621  
39.7411455670172 39.859345745831 42.5660695551615 41.253645578517  
40.831207953647 42.0621425894624 39.5637454855233 38.5668610487033  
47.9566297250148

LOC644733 46.6348258763289 40.7952353240579 54.3554233228353  
47.9915414951747 46.8674366115656 41.8613406887824 42.7431359850339  
46.7980335276155 51.3511088648386 43.9450023643394 39.5399188536544  
42.8864415494484

LOC644734 42.2455707947223 45.4882438975269 39.991353369336  
41.1886975241176 36.9060997041453 39.8455060654531 50.3519150282938

43.3262148375525 40.2274522635576 45.5776159432079 40.723990462047  
42.357910063876  
LOC644735 40.9558083259517 40.2493681589104 41.437237454134  
38.5252456306656 43.9450023643394 37.0180934800573 37.4772922422734  
36.2539950294089 46.3203995372658 44.571915452417 41.0050831223107  
40.6614700944853  
LOC644736 37.1485601150873 40.2493681589104 42.8270038153139  
41.6564075217517 43.2484996523549 41.159706131351 44.3440839686558  
42.8482181313226 41.6616444147804 43.4885245598939 42.357910063876  
41.1554481567603  
LOC644738 42.0532901689036 46.5650556481721 45.310660704531  
43.4410741327254 43.004943518025 45.6129956328415 43.9450023643394  
39.7509165247419 46.4861258030402 49.5265949137207 41.0050831223107  
39.3575468494941  
LOC644739 57.3630011621358 71.3868929454853 58.9801947700265  
61.0006903514088 54.3736840324687 76.7063975550116 64.3228642615016  
59.6720198281342 63.7665341104267 55.1913959822834 59.5489241599954  
62.9165938167938  
LOC644743 1109.17675353971 1250.15619347362 1099.52344340557  
52.9156540211793 464.99944459917 150.941470539313 763.947361966861  
1199.29782389306 1077.94530110976 275.096637886925 514.70012608304  
180.63535336811  
LOC644744 40.0557788909923 38.8336427948187 38.6727842796202  
40.7481155008596 42.4864576619427 42.6575535390785 39.0458123429605  
44.5029690493211 38.0213051227859 38.4187686307607 39.9070785037411  
39.7411455670172  
LOC644748 41.4508241771315 40.2493681589104 40.931294690669  
54.4586176399381 45.1137938810047 45.3882138838137 40.9157352260901  
40.047314525032 39.2809305246091 40.8970401536578 46.3370338074996  
40.1700117452801  
LOC644749 41.1523487516364 43.3458769998118 45.8844325913247  
45.0798408927912 44.4489662507893 41.3553369544097 46.9929836306816  
43.3262148375525 44.8997235283254 42.3606390470387 44.9713479185144  
43.6753843488695  
LOC644753 39.6609238036815 37.3634897565502 37.2838080935695  
36.890925044696 35.7973685350741 38.8336427948187 38.0598374201407  
35.3608605269276 37.8319142847141 38.528621456378 37.6484782516569  
34.3409660445447  
LOC644756 45.5758521267508 45.4882438975269 45.1569741609597  
48.1662933382789 48.0234896130991 40.7616966228404 43.0930293831497  
42.6450179841129 38.2215591930186 42.8936990772838 41.4508241771315  
41.6550823405646  
LOC644760 52.8427643366617 51.3084273211359 43.4709415392696  
35.8472302065546 41.0885562160946 37.2686490268265 39.3585350448719  
39.9576138799997 38.9834959368496 34.8137085420423 35.046946054314  
40.7704587752083  
LOC644762 89.7554896946341 107.513442725922 124.777882272835  
115.299308625328 128.146059846414 155.888873407786 106.878946016737  
106.190104122745 127.398722392954 68.2708120569221 77.5698542248061  
142.325407418006  
LOC644763 42.6036491382658 40.8880530359822 37.7384958256497  
42.8235313007746 42.9090346219023 46.6872654833579 43.5627649099623  
46.1673159982664 43.1805016690297 46.7646877499666 41.7272875295469  
41.1554481567603

LOC644764 40.6559419616644 46.6996902348633 38.3166554965434  
39.1706564265495 46.3150221024046 38.2293008890613 36.08956004634  
39.3709357615493 39.2809305246091 43.4885245598939 43.5710871617107  
41.2437378488025  
LOC644766 42.9104454767916 39.6123051184545 46.0727230219512  
43.4410741327254 44.4489662507893 44.1737502492846 40.9157352260901  
41.9315419791594 40.8970401536578 48.9826868640753 38.3684202018524  
42.2577689927563  
LOC644767 39.266565827316 40.0527893189096 45.7968648044613  
40.8681871019812 45.1137938810047 42.4580504587581 43.3262148375525  
37.1317006162938 39.3750969348308 48.8623729374733 41.5421429082231  
40.7704587752083  
LOC644768 40.5654775358427 39.3622375852537 45.7452456977857  
41.8291484190524 42.5449473689701 40.3946758935842 42.4493032770053  
41.1575777497576 42.0621425894624 43.128936937037 38.956280281655  
43.6434576713809  
LOC644769 40.6559419616644 39.5050383901884 42.2577689927563  
36.890925044696 48.6224651100733 39.2985791324641 44.6032218589199  
40.047314525032 41.863927676552 34.8137085420423 42.6366765186182  
41.6550823405646  
LOC644773 40.5654775358427 40.4359177791566 38.7745734037492  
46.614092935749 41.6806984441849 39.3841861812262 41.706879587091  
38.3684202018524 41.2870505273664 38.528621456378 38.6662194645633  
41.7575097298927  
LOC644774 416.40156274382 361.776841675393 540.170798097714  
477.558242266308 263.492132556601 304.658728492827 328.295200683554  
151.438409623226 808.857027942253 68.8167148906225 109.23113111292  
308.841311505431  
LOC644779 41.5421429082231 41.0678614026819 41.785676764591  
37.7469621225553 39.0564222526273 42.157627240486 31.8431345631453  
40.1474543172332 42.5406888281114 36.8059561571675 42.170702295259  
43.6753843488695  
LOC644781 42.2455707947223 45.4882438975269 40.4070046183108  
46.4555908533915 41.5668884168669 44.3648993568405 43.4544762830742  
39.0620487644635 42.5406888281114 42.8936990772838 41.9083581529276  
45.2783024981315  
LOC644782 42.8036731479932 39.1982470626863 33.8558232866797  
37.29566077996 42.0709558258414 36.9060997041453 35.9894133432376  
34.9580369221164 36.4476883897928 34.1648535095605 35.9563099719284  
37.7526485343328  
LOC644783 40.148780650831 38.3322849790657 45.7968648044613  
39.1706564265495 39.9697332660833 38.7340969861754 41.706879587091  
41.0381860307445 40.2274522635576 41.7405682794166 44.1148826235374  
36.6603338274678  
LOC644785 43.9309845324767 43.5182502375207 34.6977013306396  
41.3027031037343 39.0564222526273 41.9543948167375 43.3262148375525  
44.6107027295193 39.5806465938526 35.0668743708816 40.3452320167286  
43.0930293831497  
LOC644787 40.6559419616644 42.6022652963326 56.2441895183416  
50.0526763693329 49.9493230064613 45.0882356578404 38.941855825269  
42.7431359850339 39.0775870687758 45.3530683538086 41.1638563416981  
39.6352613956998  
LOC644789 46.7293238583888 49.7363778831003 43.1931731665131  
42.9358255168086 39.6535880152834 45.0882356578404 45.8980298854198

52.3068458655445 45.5779686360641 49.7259371799014 47.9942520395434  
45.4799270968969  
LOC644799 155.01005229951 173.711189659585 155.908644253547  
98.5663841503803 218.552143403657 226.235985918654 134.407474121421  
213.285274542564 219.527698657901 265.320447667174 309.39599482851  
319.502295093307  
LOC644800 39.6609238036815 41.8848959280916 39.1799070031819  
39.7411455670172 43.4544762830742 44.9896851005259 43.8206425661746  
40.5158867964016 42.0621425894624 37.4302011516587 38.956280281655  
45.7562276914441  
LOC644802 36.9060997041453 36.3110701990588 43.1931731665131  
44.0451487108213 41.9842695818285 41.3553369544097 49.6872467499977  
40.5158867964016 40.8970401536578 40.7063426028871 38.2795150354677  
43.7672102682067  
LOC644806 40.5654775358427 43.5873188565519 41.437237454134  
45.1944222548351 50.7615314686244 43.3785777889265 42.9803717121865  
42.7431359850339 48.6494451061637 39.5637454855233 45.0589947942306  
44.0451487108213  
LOC644808 38.304249186058 39.6995529770239 40.5734458834617  
34.4382958501338 37.1565984182084 34.0777108441756 38.5066108855005  
38.1835938174625 35.6970528713709 36.5806287103157 36.0481934423077  
39.9519547348106  
LOC644809 44.8914371498528 38.3322849790657 44.4311655729487  
52.5307002738469 44.7829632472754 43.8582747295766 40.1235656101329  
44.6107027295193 44.0519245668737 43.2988017098387 38.956280281655  
49.904979214379  
LOC644813 42.1537476443423 44.1239711172417 43.3085358214154  
52.1201052574162 34.806104801006 41.6590564937735 40.5585676679482  
44.6107027295193 41.5635499110307 40.4136535208406 39.5399188536544  
47.1060577218993  
LOC644814 40.8681871019812 40.7952353240579 33.553634633839  
41.3027031037343 42.7982502551634 45.3882138838137 41.253645578517  
39.2672712041774 46.581796165231 37.1275334308172 36.7283081422707  
36.6603338274678  
LOC644816 53.3967242431461 50.4872122867759 46.5650556481721  
41.0726336841311 48.6224651100733 42.6575535390785 45.1017494688414  
39.9576138799997 46.7760357462635 40.5090849993014 37.2892641289258  
42.1537476443423  
LOC644819 35.2267149016596 32.0823591288671 38.9790184198145  
42.0102671859606 34.1686574241133 40.1428591998404 39.5496902678788  
41.9315419791594 41.5635499110307 40.4136535208406 38.2795150354677  
39.5418280570561  
LOC644824 48.7646976789783 36.2103905554984 43.401782064778  
51.3851157261451 38.3561682218911 41.159706131351 42.8684958525042  
41.1575777497576 38.8271346375425 42.5664883002833 40.2649309204478  
40.7704587752083  
LOC644826 43.0930293831497 42.3550738181144 45.1569741609597  
44.9370339275041 39.3667161654772 40.3357777530419 44.8643898647322  
43.5544347011646 44.7058233759912 43.7303813515864 38.956280281655  
41.4508241771315  
LOC644827 45.5758521267508 42.2577689927563 41.437237454134  
32.7960913111995 37.4470183315826 41.6590564937735 39.5496902678788  
39.0620487644635 37.0126425326534 36.5806287103157 42.8263096141654  
37.7526485343328

LOC644828 42.442231667357 46.9919960628953 44.0451487108213  
46.614092935749 42.3685136297603 42.9695585740813 44.0687697278114  
39.3709357615493 43.9450023643394 40.8970401536578 45.390192977585  
39.3575468494941

LOC644829 39.9697332660833 37.10170285405 42.157627240486  
38.8495095797881 36.2048942610546 36.8059561571675 42.7431359850339  
46.1673159982664 39.2809305246091 37.2089297656361 40.2649309204478  
35.7451401627836

LOC644830 43.3638918705225 38.9338521051669 40.1985790927248  
42.8235313007746 42.9090346219023 37.9951997351435 40.0052661202207  
41.5464765641928 36.0741672064298 36.3612409063792 38.4689132737495  
36.9976231206067

LOC644836 40.8681871019812 39.0102066700839 41.9666541498638  
42.5664883002833 42.3685136297603 44.8872784170036 40.9157352260901  
44.0390019242862 43.0930293831497 45.4614234442527 39.9070785037411  
40.8681871019812

LOC644838 43.0394685862018 39.6123051184545 42.4838572979457  
43.0001432913058 44.8897737954573 41.0582900711341 44.5405708125698  
39.8812234363661 41.2870505273664 43.4598349902811 40.2330489360997  
39.3575468494941

LOC644841 48.6621527194963 45.1694246393676 44.8872784170036  
47.0874209746031 43.5544347011646 48.0350549043063 51.7714254834195  
41.7419877611072 44.5303781239209 48.4890615340603 43.7585538437696  
40.9683275553869

LOC644843 37.3463875295726 41.2598458726002 43.1931731665131  
34.8137085420423 43.1252272136667 40.040778349137 39.1539892144371  
40.4359177791566 33.8558232866797 37.4302011516587 37.6484782516569  
35.9604262434141

LOC644844 47.5647821785529 3343.07293372655 608.005012673672  
61.5515639412892 51.7983110178095 62.7515429046888 49.3854238365325  
47.9942520395434 71.6573554353691 155.633918471987 204.009492151839  
55.3563533836982

LOC644845 40.9558083259517 44.2105195734073 41.6079958749402  
44.550322123994 38.8456942580061 39.2248354955045 39.5496902678788  
36.7460922671619 41.9635525160083 37.8217989841918 36.7283081422707  
42.6758568421347

LOC644846 40.3478825593224 41.4508241771315 50.6004078448405  
53.2046867327331 39.3667161654772 47.2009420656854 46.4388841354122  
44.9977782988116 41.5635499110307 42.6793753550854 49.4593570700221  
48.5123041297835

LOC644852 65.9273663561152 52.2236479204029 58.9135553403521  
74.9516438365174 48.5000946421718 46.8954576545929 59.9792284253187  
88.7801816370065 52.5353664902258 77.4999637278723 78.055431384988  
70.25295977615

LOC644853 40.0557788909923 39.9697332660833 42.7303139017786  
38.9534635879195 41.3755760434934 37.8102105794655 40.1235656101329  
40.3357777530419 41.6616444147804 41.7405682794166 42.5426057453993  
38.745552403895

LOC644856 43.6706764143908 37.10170285405 40.931294690669  
37.651298468202 37.3508690072156 39.3841861812262 40.6750540874299  
45.7476095696859 34.8552366193358 46.8954576545929 39.153226699662  
40.5703581862752

LOC644863 2551.57660786358 2045.24530722676 1752.11152588494  
1683.24873205783 2024.4791883541 2559.659041589 2201.39729904166

1704.0522304387 2024.4791883541 1208.33498233518 1519.01001038342  
2054.64068255575  
LOC644865 43.9309845324767 42.4493032770053 42.5406888281114  
43.6726153508978 48.1473938886239 48.5835484742456 48.4859552186772  
46.7980335276155 50.0526763693329 45.2556760873335 45.6348103033479  
44.2527566343661  
LOC644869 63.8626921347231 89.4747568145717 82.051509943308  
70.506090074243 53.0419743379342 92.6036872789676 51.3064929551674  
75.0377156190383 114.935101645207 56.1912096308988 71.9162507601624  
97.2927456872797  
LOC644873 39.4710743516517 39.8695929627783 41.785676764591  
42.9358255168086 40.4639532172338 34.8956628705329 42.1607322031054  
40.047314525032 40.2274522635576 45.1569741609597 44.0409178714232  
40.7704587752083  
LOC644876 35.1307934330047 38.2263227947189 40.4070046183108  
49.3654837541353 34.806104801006 44.3648993568405 40.9157352260901  
33.5578650644246 44.619512785899 41.1222709786153 45.2265319826548  
45.8546719310325  
LOC644880 35.3227485563945 44.3529919625344 38.3166554965434  
40.1804147506786 40.2449343247539 34.8956628705329 40.5585676679482  
39.3709357615493 44.2607789091176 43.2988017098387 42.8263096141654  
39.6352613956998  
LOC644883 42.9104454767916 32.0823591288671 40.1985790927248  
46.614092935749 42.3685136297603 40.9506062495231 41.0381860307445  
44.0390019242862 37.4540772310118 41.4397539024976 40.9157352260901  
44.0451487108213  
LOC644884 46.263826584899 38.2263227947189 48.6037684272115  
40.0698728584484 38.5512429290626 43.0860383229288 47.2927436772465  
40.7311497914871 40.4997186069494 43.401782064778 42.170702295259  
48.6037684272115  
LOC644885 39.4710743516517 40.7952353240579 39.0775870687758  
42.0102671859606 41.8806343997257 36.3845892764084 41.5817737564592  
41.2551966132486 33.2715481910159 39.4710743516517 40.723990462047  
37.0953622406687  
LOC644886 39.6609238036815 43.7644428186265 42.5406888281114  
39.3750969348308 40.5710637884029 36.4986986135769 37.7136011474903  
41.8417024632349 38.5252456306656 41.1222709786153 43.9450023643394  
41.4508241771315  
LOC644887 43.4626049853157 42.0709558258414 41.9666541498638  
42.4580504587581 42.269054475455 44.2607789091176 40.1235656101329  
41.0381860307445 46.1101825640108 42.2614524730856 42.7275315121163  
41.7575097298927  
LOC644889 40.148780650831 60.4646208319121 39.0775870687758  
40.1804147506786 56.8307116636372 45.1873487463472 82.3887053739195  
42.5435283762933 51.6731332961917 40.6022003765153 39.4410515050885  
70.5322939116406  
LOC644891 36.9060997041453 39.1982470626863 47.2962360458401  
40.646702696033 44.4489662507893 39.4953494583071 43.3262148375525  
41.0381860307445 43.2761454096265 37.1275334308172 32.406093465115  
42.6758568421347  
LOC644897 38.2083710281545 41.3610369241157 42.7303139017786  
39.853175885492 44.4489662507893 45.4882438975269 39.8695929627783  
43.4544762830742 41.2870505273664 37.1275334308172 43.0016969050339  
35.1451084093692

LOC644898 36.9060997041453 40.9731067463382 43.6670755115848  
38.4208429103799 35.7973685350741 44.3648993568405 36.197424053556  
39.6474008369935 43.0930293831497 40.4136535208406 40.547835538778  
39.3575468494941

LOC644899 44.3355304829989 44.5884811528117 44.1452943804044  
36.7892997857376 35.5220586859301 43.7630587657205 43.9450023643394  
43.1567024035183 49.7336769474446 43.7303813515864 38.8507804383261  
40.8681871019812

LOC644908 35.8208542506595 39.3999056968598 40.0998167098057  
46.1673159982664 37.2567512265363 38.9378717994178 41.5817737564592  
44.797320243931 40.9901805728485 35.4990901121893 35.2339574411711  
41.2437378488025

LOC644912 34.9138625012006 41.7337506166619 41.0356368374708  
39.6292788039793 44.3557408297309 35.8227939208521 48.0283573444179  
39.0620487644635 38.3418933808844 38.2069499294002 38.4689132737495  
34.806104801006

LOC644916 43.2724556187214 41.3610369241157 43.8495248991589  
45.334106390212 41.467005949568 38.6414316877471 39.7576136507593  
41.9315419791594 36.3649677956953 44.0409178714232 32.5482839399637  
41.6550823405646

LOC644917 37.7384958256497 46.4861258030402 40.6737160001291  
47.2009420656854 44.4489662507893 32.2133093774284 42.1607322031054  
42.0494116081998 43.0930293831497 38.957687788868 43.4709415392696  
41.6550823405646

LOC644919 49.6241203903354 97.0589984189239 71.8706847571669  
38.6414316877471 83.9387217886961 47.5733603903505 71.5249259772583  
59.5830868881343 107.808744445896 48.3693338695392 51.6414075056938  
45.5800840647989

LOC644921 40.2543341073001 44.6918600441328 38.8775560911841  
42.5664883002833 39.6535880152834 40.1428591998404 39.4600924554505  
44.4031868028216 39.853866204927 39.3698811593364 37.3687900733549  
38.0452862258803

LOC644922 40.0557788909923 41.4508241771315 46.5650556481721  
41.0726336841311 39.6535880152834 33.5578650644246 43.0930293831497  
42.157627240486 42.4540072551568 39.4710743516517 42.357910063876  
37.5556299264699

LOC644923 37.4554876386402 40.0527893189096 45.8844325913247  
42.0102671859606 38.0598374201407 37.8102105794655 34.5633623842083  
41.1575777497576 38.7298222155532 43.4885245598939 38.8507804383261  
40.0557788909923

LOC644925 43.5710871617107 43.683792219729 48.6037684272115  
46.4555908533915 48.8381507187986 43.8582747295766 47.1345949868029  
48.272324215504 41.5635499110307 41.1222709786153 44.2925355984056  
46.917149434588

LOC644929 42.3433931248155 47.087835967892 44.3344900481112  
41.4273122914951 36.6354013629791 37.8102105794655 43.4544762830742  
39.3709357615493 39.7537274655115 44.8997235283254 40.723990462047  
42.57175366709

LOC644931 99.7403508491191 72.1401612718245 113.18951586976  
115.468303687641 113.747633871556 79.4053001255904 71.3527183280827  
139.925369282704 58.7382738968248 104.129763935677 101.008449241109  
71.2491135258076

LOC644934 376.749116251503 942.247437385029 580.444451816014  
347.750020791938 324.223368470876 957.682898193927 366.716775127375



1145.59111340228 908.328776521114 704.378495149104 334.016152807947  
343.382663050351  
LOC644935 90.6805895192707 100.066535982734 113.6408244935  
121.562769658314 109.14984236229 132.985150338484 100.289042948128  
87.4850071876743 125.209476374199 197.52820443061 172.221482103025  
147.388500451427  
LOC644943 41.4508241771315 41.3610369241157 47.0055981216687  
42.1273928203021 37.7576900881741 43.4681646416585 40.9157352260901  
40.4359177791566 42.1594905198929 38.4187686307607 37.2018803984555  
44.3521099857368  
LOC644944 39.4710743516517 34.0382693188794 32.8745892439217  
38.8495095797881 36.9060997041453 36.6271061451613 40.0052661202207  
41.2551966132486 33.802253812079 39.2623423164488 37.0180934800573  
36.2582325396375  
LOC644946 40.5654775358427 38.7344853699576 41.0356368374708  
41.4273122914951 46.1804647841331 39.6251842352088 38.8417151851134  
40.047314525032 44.5303781239209 43.1839109702714 36.43924066428  
41.6550823405646  
LOC644948 41.1523487516364 44.4411734611229 37.2838080935695  
40.5484717678957 39.6535880152834 40.5281496800812 40.7910160811527  
40.047314525032 38.9006788676407 38.6454098044474 40.547835538778  
37.6557714476853  
LOC644950 38.6454098044474 47.5647821785529 35.8265993915844  
47.9915414951747 37.8679241954337 40.1428591998404 45.4799270968969  
39.2672712041774 46.1101825640108 45.3530683538086 39.9899430628542  
38.5279745308203  
LOC644951 42.3433931248155 38.4330755397458 44.9758339877851  
46.4555908533915 37.1565984182084 41.9543948167375 39.3585350448719  
41.4508241771315 40.9901805728485 45.6868589181768 38.956280281655  
45.0985088502363  
LOC644952 40.6559419616644 41.4508241771315 36.2683886571585  
42.2496337895968 51.1368583672022 40.040778349137 40.5585676679482  
40.4359177791566 40.9901805728485 41.2276963324981 39.153226699662  
37.4554876386402  
LOC644953 40.148780650831 32.7800533388945 38.3166554965434  
42.357910063876 43.844855336215 36.9060997041453 38.6243997507646  
33.6816578730693 34.0382693188794 36.2435874904689 38.5668610487033  
37.0953622406687  
LOC644954 39.1590964332473 33.3069622728735 42.9104454767916  
39.6292788039793 38.2496050953547 37.8102105794655 41.4742337714895  
41.1575777497576 42.1594905198929 40.8970401536578 41.4508241771315  
39.2469742642337  
LOC644957 38.1169703906207 40.3384318592985 39.7411455670172  
45.334106390212 43.4544762830742 43.0860383229288 40.6750540874299  
36.8400213077707 38.5252456306656 37.7315666632629 40.2649309204478  
36.8690774823319  
LOC644958 41.4508241771315 42.4493032770053 40.6737160001291  
43.6726153508978 48.1473938886239 40.9506062495231 42.4939802311136  
41.0381860307445 46.0106098064475 41.2276963324981 47.4630625313159  
44.5432192783161  
LOC644961 40.6559419616644 45.2556760873335 37.2838080935695  
41.5464765641928 38.8456942580061 44.7804080899431 33.6696565339534  
38.8495095797881 41.5635499110307 39.3698811593364 39.9070785037411  
38.3291713594599

LOC644962 39.4710743516517 37.8217989841918 41.1742244762318  
37.8129870676592 38.9496515344837 42.5660695551615 39.3999056968598  
41.5464765641928 39.853866204927 40.4136535208406 41.134180463103  
40.4261913313642

LOC644963 44.1294459089314 44.1239711172417 38.0452862258803  
40.8681871019812 46.9906120932727 35.6125439901743 49.3854238365325  
42.7431359850339 45.5779686360641 42.9866214102525 43.5710871617107  
38.8495095797881

LOC644964 37.6397652536077 37.5469247328848 37.8386378737561  
43.9282059368202 31.6519589095843 42.9695585740813 46.7100796279384  
37.4484310268909 39.9444191873552 39.1621898366355 42.8263096141654  
45.1735152121056

LOC644968 36.7356360093603 41.554942319225 46.4569566520107  
42.4580504587581 39.2608760193011 46.7800033479223 43.0930293831497  
42.9301944191913 42.357910063876 45.1569741609597 38.956280281655  
38.1421709520616

LOC644973 42.5193208629123 41.3610369241157 40.8420925848403  
43.6726153508978 45.5809132232681 48.1591264215184 51.9421032049606  
41.7419877611072 42.6366765186182 42.9866214102525 41.9908237694988  
44.2527566343661

LOC644974 39.9697332660833 37.8217989841918 39.6451483836089  
44.4367387274922 44.6834648302383 37.3799542961839 42.1607322031054  
38.8495095797881 45.0017158586743 44.571915452417 39.2542963855807  
40.7704587752083

LOC644975 43.7585538437696 43.2649781354792 41.3366779545815  
45.8844325913247 51.2525124735102 40.244271403831 40.7910160811527  
39.2672712041774 47.798305839406 51.6778366958973 46.3370338074996  
44.5432192783161

LOC644976 42.3433931248155 44.5884811528117 39.8299340037009  
41.7614975630362 41.0885562160946 43.5416683728269 47.4439407315335  
46.3685439301234 43.0456011922275 45.2023300009435 39.6833800000587  
41.9083581529276

LOC644978 46.263826584899 38.2263227947189 40.0998167098057  
40.4359177791566 42.1650127805175 38.8336427948187 42.629412460409  
39.3709357615493 35.3227485563945 37.1275334308172 39.4410515050885  
41.7575097298927

LOC644979 62.358854072801 73.2144205844199 53.9612654850046  
46.546116650292 60.6734048807953 68.6424653037264 55.6268253440479  
50.3082459161777 68.6847047963888 58.2167393576361 54.6089451252049  
64.4156641487994

LOC644981 39.4710743516517 45.4882438975269 36.769073068743  
37.9875302985336 43.004943518025 41.0582900711341 36.197424053556  
39.2672712041774 39.0775870687758 43.4885245598939 39.5399188536544  
38.1421709520616

LOC644982 48.7646976789783 42.2577689927563 41.9666541498638  
42.6913548400127 42.0709558258414 39.2248354955045 54.0170817319522  
38.1835938174625 39.9444191873552 40.1179210534118 43.6629145624937  
42.357910063876

LOC644986 38.2083710281545 34.6306468196142 44.4311655729487  
45.5869891570251 43.7517118200398 44.2607789091176 45.1017494688414  
40.4359177791566 38.5252456306656 42.6793753550854 38.4689132737495  
42.6758568421347

LOC644989 40.2543341073001 43.9421822132391 43.0971787292711  
43.1847628331565 41.9842695818285 39.2985791324641 39.0458123429605

50.628152951493 44.619512785899 41.8613406887824 38.4689132737495  
47.9566297250148  
LOC644992 41.0608773166058 39.6995529770239 43.1931731665131  
51.0175677516029 45.3675390992851 47.0940613507321 43.6753843488695  
41.2551966132486 47.6195009345747 47.1001757441025 42.0750889188255  
48.27609330316  
LOC644993 40.0557788909923 43.0227387991135 41.437237454134  
43.3078542962968 42.3685136297603 46.263826584899 44.7255207589606  
43.844855336215 39.5806465938526 41.0057887014368 39.9070785037411  
41.863927676552  
LOC644994 40.8681871019812 35.9305494063137 43.0016969050339  
44.1483976313959 42.9090346219023 43.1826328292558 39.2533668167483  
41.3506832276112 40.4997186069494 43.1839109702714 44.4688999098904  
51.2318935933116  
LOC644999 42.9104454767916 45.0905928998779 44.9758339877851  
42.0102671859606 44.0451487108213 46.0364000143537 46.4388841354122  
42.357910063876 39.1790517315259 43.7303813515864 42.170702295259  
39.4490233720848  
LOC645004 42.0532901689036 42.6939394537076 38.8775560911841  
37.651298468202 36.3390947880186 37.8102105794655 38.941855825269  
37.4484310268909 45.1899271235974 37.5343260962758 41.0808257270221  
41.7575097298927  
LOC645006 39.7576136507593 42.6022652963326 39.6451483836089  
37.9875302985336 39.1650142708257 47.9503724044453 43.3262148375525  
41.1575777497576 41.2870505273664 38.1042454705119 41.0050831223107  
42.57175366709  
LOC645010 37.1485601150873 35.9305494063137 37.0642268327439  
39.853175885492 40.8873907150245 44.8872784170036 39.7576136507593  
36.8400213077707 42.1594905198929 43.4885245598939 46.3370338074996  
39.8497227447888  
LOC645012 35.4287975493553 38.5252456306656 35.3649449469275  
36.4564050256915 37.1565984182084 36.6271061451613 35.3362091871364  
37.1317006162938 38.4344387289956 36.5806287103157 33.8558232866797  
32.7043743065388  
LOC645013 40.4639532172338 38.5252456306656 42.157627240486  
41.8778873678551 40.9950639693255 36.6271061451613 39.1539892144371  
48.5681478665796 37.9273653326866 41.0057887014368 43.0971787292711  
41.9430737035925  
LOC645015 50.8388984085636 54.7855575216687 62.7605715573218  
49.9014504704021 52.8190882379316 47.4699236780425 52.0942589368478  
44.7044140979108 51.1055541075029 44.3648993568405 48.9754340235127  
49.3984571719129  
LOC645018 69.0975200641705 94.8036856848998 122.748811531184  
102.177189421378 114.363816429963 84.1922656126304 97.712117589297  
78.3542840447759 102.706563820232 144.835567449189 94.7008981904016  
128.436305192918  
LOC645029 40.4639532172338 45.1694246393676 47.7737810047679  
41.6564075217517 47.9128504683618 49.3172204533818 42.357910063876  
50.7364620410977 49.3780606970538 42.785429206422 45.0589947942306  
40.3691324547049  
LOC645032 41.7397731376692 39.6995529770239 47.646800205189  
38.5252456306656 38.745552403895 49.1013967533186 40.4359177791566  
42.4580504587581 40.5912213523345 35.4990901121893 39.9070785037411  
41.9430737035925

LOC645033 40.7609952437622 42.9358255168086 50.8303921211581  
34.2080003860523 40.8873907150245 46.8954576545929 38.6243997507646  
44.5029690493211 40.6957787921451 45.9004543328976 42.911855821602  
40.7704587752083  
LOC645037 37.4554876386402 40.7952353240579 46.8267540220952  
38.745552403895 51.0107745412152 41.159706131351 38.8417151851134  
41.1575777497576 42.4540072551568 39.7835513496873 36.7283081422707  
39.6352613956998  
LOC645038 39.9697332660833 41.8848959280916 42.640829914102  
40.3180310664156 45.4751076037511 44.2607789091176 46.9929836306816  
42.6450179841129 41.2870505273664 39.5637454855233 39.9070785037411  
40.3691324547049  
LOC645039 41.8409927585705 43.9421822132391 42.9641759692926  
43.4410741327254 43.5836473788312 42.8598805316863 41.6466169548846  
42.0847226073592 42.846832824953 44.0719548209593 42.9634662926872  
40.4639532172338  
LOC645040 38.7537364570873 41.8073910693411 43.1931731665131  
40.7481155008596 41.6806984441849 40.244271403831 38.8417151851134  
43.3262148375525 46.2027193115397 43.401782064778 39.2542963855807  
45.8546719310325  
LOC645043 39.7576136507593 40.5400384479766 43.401782064778  
45.8844325913247 41.3755760434934 41.9543948167375 42.2577689927563  
40.831207953647 44.4395580493118 43.0919221375514 40.8225507267584  
40.0557788909923  
LOC645045 39.5676051939342 39.6995529770239 41.6079958749402  
42.5664883002833 41.8806343997257 43.9724628401189 41.5817737564592  
42.157627240486 40.4220196471124 45.6868589181768 43.7585538437696  
36.2582325396375  
LOC645048 40.5654775358427 39.5050383901884 40.7620472083159  
35.9521941716188 45.3675390992851 39.7394181011603 39.7576136507593  
38.745552403895 40.2274522635576 39.7835513496873 36.8282383070068  
39.2469742642337  
LOC645052 42.1537476443423 37.6383530120621 36.4564050256915  
42.8235313007746 37.6527901109005 37.9951997351435 39.3585350448719  
39.0620487644635 39.5806465938526 44.4652605017595 42.0750889188255  
41.3481355128089  
LOC645058 570.204236909398 461.123856163975 615.838713743621  
559.427936614255 461.258911881166 499.744856832174 447.348799009312  
509.463928291526 1076.05074395483 324.506136847875 338.108557083245  
767.489657259345  
LOC645066 41.9407041937973 42.9358255168086 43.4709415392696  
40.9607305725196 41.5668884168669 40.1428591998404 38.7337086062875  
42.5435283762933 41.074824727477 40.1179210534118 39.4410515050885  
42.1537476443423  
LOC645070 39.266565827316 38.6414316877471 37.7384958256497  
47.0874209746031 36.3390947880186 37.2686490268265 41.0381860307445  
40.6171774724171 38.4344387289956 41.2276963324981 39.6403089864678  
47.8931773060789  
LOC645073 45.8108990837624 41.159706131351 40.301483914446  
45.8844325913247 40.0599807618105 45.8325181856483 46.0228732507872  
42.9301944191913 41.7627910693483 45.1569741609597 40.6373400186325  
44.3521099857368  
LOC645078 35.6111578834671 36.3110701990588 37.1643693306382  
38.6414316877471 37.0526522140242 39.132725377815 37.6036146841933

33.2467975244196 44.8003345643334 38.8507804383261 40.723990462047  
37.5556299264699  
LOC645079 56.0477607422828 49.0697565324841 59.8273072817267  
57.0629653735694 46.5557478175976 43.0860383229288 53.7423898357583  
49.085741080241 49.7336769474446 53.3059058105836 47.6884372645373  
47.2131144508464  
LOC645084 36.7356360093603 36.6968906669565 39.0775870687758  
33.1817617228171 34.806104801006 35.0970060242246 36.634024014558  
32.7676164492555 41.9635525160083 34.1648535095605 41.0808257270221  
39.7411455670172  
LOC645088 40.2543341073001 38.9338521051669 40.301483914446  
37.29566077996 43.1252272136667 42.157627240486 42.1607322031054  
37.4484310268909 44.0519245668737 40.8049408996274 41.6336636285875  
41.9430737035925  
LOC645089 36.9060997041453 36.89524015739 37.4642807402741  
35.314469458379 39.5595233162192 39.4953494583071 38.2933870238743  
33.6816578730693 37.10170285405 45.2556760873335 41.9908237694988  
45.3763275588341  
LOC645090 44.436995101921 42.5269793679335 43.8495248991589  
43.8002456102021 49.9493230064613 37.1317006162938 48.4859552186772  
44.1311654985682 43.3744503319109 46.6598879466655 42.8263096141654  
42.4607795638552  
LOC645093 35.1307934330047 33.3069622728735 36.9795961564828  
34.9221408381038 36.3390947880186 34.9849896310235 37.0564573649223  
38.079222289614 37.8319142847141 33.6902293666089 38.8507804383261  
37.5556299264699  
LOC645098 39.4710743516517 39.8695929627783 38.4043916290561  
60.1837189855762 45.1137938810047 40.7616966228404 38.0598374201407  
46.9986083378817 40.6957787921451 40.4136535208406 47.8988096575648  
38.5279745308203  
LOC645099 38.5372368196365 42.1607322031054 41.9666541498638  
40.9607305725196 39.7568367479301 39.8455060654531 37.9905182666856  
36.2539950294089 37.7779024421017 40.2601451506332 42.1516028411593  
38.6948848106802  
LOC645100 59.046385957117 46.6996902348633 53.0630927250439  
40.9607305725196 45.3675390992851 45.8325181856483 58.0969258817391  
40.4359177791566 52.9482338979681 39.6719190054379 42.911855821602  
51.6660481331154  
LOC645104 40.6957787921451 41.6466169548846 42.2577689927563  
45.6706505553383 40.9950639693255 39.9777866059804 42.357910063876  
40.5640952422779 41.6340461942423 38.8173773425835 41.3945375181463  
43.2177497174408  
LOC645113 43.3638918705225 34.8137085420423 40.0998167098057  
44.9370339275041 38.4540849632254 46.1513019317765 41.1507980856436  
42.357910063876 40.137818555383 44.4652605017595 41.6336636285875  
42.357910063876  
LOC645116 38.8561375693335 36.1232327599945 39.1799070031819  
42.9358255168086 38.0598374201407 39.6251842352088 40.9157352260901  
39.9576138799997 37.3600014814388 41.1222709786153 40.9157352260901  
46.5650556481721  
LOC645118 40.0557788909923 39.1982470626863 40.301483914446  
44.4367387274922 38.5512429290626 40.650742261428 44.0687697278114  
45.8669209716694 39.0775870687758 44.2580151149956 37.5583886316038  
42.9887069977696

LOC645123 39.9697332660833 46.4861258030402 42.7303139017786  
47.9915414951747 41.1868052124344 42.9695585740813 46.7100796279384  
38.5457716679071 42.5406888281114 44.8997235283254 48.2910530887214  
39.4490233720848

LOC645126 39.7576136507593 40.716553247236 41.9666541498638  
47.481302504066 44.9936360641969 38.6414316877471 38.8417151851134  
41.0381860307445 46.6944238390932 40.2112371512838 40.4504608195666  
39.8497227447888

LOC645128 55.7246872330059 46.2286164776607 50.6004078448405  
51.7739270955254 59.8102324370568 42.9695585740813 45.4799270968969  
45.2806199505029 43.3744503319109 43.1839109702714 45.5707650534259  
46.0633179231318

LOC645133 49.9419897484381 40.2493681589104 39.6451483836089  
40.4359177791566 47.0954207417646 46.8954576545929 46.7100796279384  
46.5717043290731 45.9227107476843 45.7911932481722 43.401782064778  
50.4847465816184

LOC645138 376.453560620912 924.316085565917 622.699896083816  
698.105755081829 804.592753722875 849.412637017524 510.525676243746  
734.143790759359 848.079114196986 968.405745860353 1045.20336057833  
1080.43016747082

LOC645139 38.7537364570873 37.8217989841918 38.3166554965434  
36.264823544143 36.8059561571675 42.357910063876 40.2154497375715  
36.43924066428 35.1155486926999 37.5343260962758 34.9428206949566  
37.4554876386402

LOC645141 39.3709357615493 39.5050383901884 43.7630587657205  
41.6564075217517 44.6834648302383 37.1317006162938 39.1539892144371  
35.3608605269276 38.2215591930186 42.4594149893798 43.9450023643394  
36.1647506311964

LOC645143 39.4710743516517 41.8848959280916 41.3366779545815  
43.4410741327254 46.3150221024046 42.6575535390785 45.3597029614942  
44.5029690493211 41.5635499110307 46.5650556481721 45.7328341667151  
39.7411455670172

LOC645144 39.4710743516517 42.7775752471711 40.5734458834617  
39.2780515621926 43.004943518025 42.357910063876 39.3585350448719  
41.0381860307445 38.3418933808844 43.1839109702714 43.3085358214154  
46.8129509799753

LOC645151 38.5007204246293 46.9919960628953 45.989212296035  
41.1886975241176 46.0043807840705 42.8598805316863 43.1931731665131  
47.2009420656854 40.4997186069494 50.22432299342 40.6373400186325  
37.8490162439785

LOC645153 44.1294459089314 40.8880530359822 48.1997158668729  
49.3654837541353 41.8806343997257 49.4157684139858 47.5963750520409  
42.5435283762933 40.9901805728485 44.571915452417 43.401782064778  
41.3481355128089

LOC645162 35.3608605269276 44.4758281923423 39.991353369336  
38.745552403895 39.9697332660833 37.842873463785 43.7585538437696  
39.6474008369935 40.4518431978241 40.3235655331796 32.4931776430014  
41.6550823405646

LOC645164 45.0985088502363 39.5050383901884 48.6037684272115  
45.4634652319753 43.4544762830742 42.750861693377 43.8206425661746  
42.6450179841129 44.619512785899 45.5776159432079 46.7386599624801  
42.9887069977696

LOC645165 45.3872406432794 48.6447083765118 45.7968648044613  
44.6905691366696 47.9128504683618 43.7630587657205 46.1634822993009

46.2779564481158 43.0930293831497 55.0016608333828 46.5650556481721  
42.2577689927563  
LOC645167 48.0201377454632 44.1239711172417 45.2313723727673  
46.614092935749 43.4544762830742 50.3245489035833 50.0088611244948  
52.9813204449021 50.2223403889892 46.7646877499666 44.8872784170036  
46.2625470410195  
LOC645168 45.3872406432794 45.5842286511645 48.6037684272115  
46.3203995372658 46.6397391251762 53.2046867327331 39.1539892144371  
39.5466975353131 41.2870505273664 38.745552403895 39.2542963855807  
39.3575468494941  
LOC645172 40.0557788909923 38.5252456306656 39.1799070031819  
42.5664883002833 35.9058393060637 43.9724628401189 42.1607322031054  
40.831207953647 37.5469247328848 38.8507804383261 43.6629145624937  
39.0536056496869  
LOC645176 44.6231541342 37.6383530120621 43.0016969050339  
41.6564075217517 49.0828761839116 51.8103411703261 51.4349390827895  
42.357910063876 46.3203995372658 49.7259371799014 51.3103617600342  
43.3744503319109  
LOC645177 39.7576136507593 37.5469247328848 42.7303139017786  
37.9875302985336 41.3755760434934 40.9506062495231 41.8315602975157  
38.4540849632254 41.2870505273664 35.7202909649682 42.5426057453993  
42.9887069977696  
LOC645179 39.3709357615493 39.3999056968598 42.9104454767916  
39.2780515621926 40.148780650831 39.9397419279057 36.7356360093603  
33.2467975244196 39.9444191873552 43.7303813515864 40.1742127891824  
40.1700117452801  
LOC645183 45.9090659324223 44.2105195734073 44.8872784170036  
48.665578118898 48.9627346956003 42.9695585740813 50.2016912396771  
38.079222289614 42.2577689927563 44.2580151149956 44.553780984244  
41.6550823405646  
LOC645186 44.5282181324797 37.3634897565502 46.8267540220952  
41.6564075217517 42.7982502551634 42.4580504587581 44.4639405506967  
40.6171774724171 47.798305839406 41.8613406887824 46.4753015651202  
43.7672102682067  
LOC645194 44.0328992213727 39.1982470626863 44.0451487108213  
42.2496337895968 39.7568367479301 41.4508241771315 46.4388841354122  
42.9301944191913 40.9901805728485 42.3606390470387 41.0050831223107  
43.4709415392696  
LOC645196 39.7576136507593 42.2577689927563 43.4709415392696  
39.853175885492 45.8051846088552 41.3553369544097 39.4600924554505  
41.3506832276112 39.853866204927 41.8613406887824 45.9104478407175  
38.4330755397458  
LOC645197 39.3100256336821 40.0952076421149 44.2405728317107  
44.0451487108213 44.0451487108213 43.6427759607073 46.4944619663072  
42.9301944191913 42.4784375889044 43.401782064778 40.9683275553869  
45.8546719310325  
LOC645198 44.7044140979108 40.0527893189096 44.2405728317107  
46.8954576545929 42.7107928951766 44.4619248757502 45.4799270968969  
45.9604707098953 43.1805016690297 40.8049408996274 41.6336636285875  
45.7562276914441  
LOC645200 36.3649677956953 41.159706131351 39.8299340037009  
42.8235313007746 44.0451487108213 44.2607789091176 42.9803717121865  
43.9366081640576 36.9060997041453 41.7405682794166 42.357910063876  
42.4607795638552

LOC645201 38.5648843914189 35.4484652445078 36.9795961564828  
32.7960913111995 34.9062568194127 40.1428591998404 44.7255207589606  
45.4757965005055 38.1169703906207 38.1042454705119 43.4709415392696  
34.9138625012006

LOC645203 42.6036491382658 37.920964499903 34.4716904283753  
33.8111782249716 42.7982502551634 38.5252456306656 44.0687697278114  
37.86982638952 40.3316153483289 38.2069499294002 40.0766543123257  
38.4330755397458

LOC645208 37.4554876386402 43.8495248991589 39.6451483836089  
37.651298468202 42.7982502551634 42.750861693377 40.9157352260901  
45.2806199505029 42.5406888281114 38.4187686307607 37.9946685306274  
46.2625470410195

LOC645210 40.148780650831 44.2630383225933 46.2625470410195  
44.265834798964 46.8674366115656 37.1317006162938 51.9421032049606  
44.5029690493211 46.1101825640108 42.9866214102525 42.5426057453993  
39.6352613956998

LOC645212 47.0940613507321 56.463481075522 48.9944486068347  
44.265834798964 55.6991707857987 59.4949177415847 63.1604223919703  
49.085741080241 52.1788489555942 49.4006068471301 50.9815930710768  
53.7442594289333

LOC645217 49.4151347850687 42.4493032770053 48.0191002461099  
43.9282059368202 38.5512429290626 42.2577689927563 41.253645578517  
45.0972184964705 45.5779686360641 47.7180816682562 38.3684202018524  
40.4639532172338

LOC645218 42.442231667357 39.0102066700839 42.1901757067073  
45.505885458784 41.3387790895716 39.9777866059804 45.8980298854198  
39.1652965788406 41.7627910693483 42.6366765186182 43.9450023643394  
40.5235471987417

LOC645225 41.7397731376692 45.7979032939211 38.2280071951674  
40.4359177791566 43.1252272136667 42.8598805316863 40.1235656101329  
41.5464765641928 43.5669306063196 38.4187686307607 41.3553369544097  
40.3691324547049

LOC645227 43.3638918705225 44.2105195734073 39.8299340037009  
42.5664883002833 37.5556299264699 42.157627240486 37.0564573649223  
44.1311654985682 38.2215591930186 38.6454098044474 41.1638563416981  
37.6557714476853

LOC645228 42.7150227340364 39.6123051184545 43.7630587657205  
41.5464765641928 39.0564222526273 41.8613406887824 42.4939802311136  
41.1575777497576 40.137818555383 47.9056710878325 41.1638563416981  
40.3691324547049

LOC645232 41.1523487516364 35.5310164682026 41.785676764591  
39.7411455670172 36.9060997041453 34.1806289878747 36.3194282084339  
39.4710743516517 40.7847110517594 37.0320432433314 43.4709415392696  
37.1747156131306

LOC645236 51.1055541075029 54.4793574349739 53.2046867327331  
52.5307002738469 57.1935729219207 51.702461863489 53.0277416531043  
59.0262390168156 50.9010149857308 55.9283039581662 51.4413099192899  
50.379587451669

LOC645238 39.7576136507593 37.2810767789306 42.7303139017786  
43.3078542962968 41.1868052124344 42.157627240486 37.6036146841933  
39.1652965788406 42.357910063876 38.1042454705119 41.7272875295469  
42.1537476443423

LOC645241 39.4710743516517 68.3372228877569 41.2365089689635  
39.066284740632 40.9950639693255 46.1513019317765 45.6042625176633



41.3506832276112 44.5303781239209 46.441301934328 41.5421429082231  
42.2577689927563  
LOC645246 39.6609238036815 38.6414316877471 38.4043916290561  
45.0798408927912 44.147557390293 43.4681646416585 41.0381860307445  
42.9301944191913 35.2143190355414 42.785429206422 41.9083581529276  
41.5536168238478  
LOC645253 40.4639532172338 41.6466169548846 42.640829914102  
39.3750969348308 48.5000946421718 46.1513019317765 42.8684958525042  
40.831207953647 44.4395580493118 39.7835513496873 40.723990462047  
44.8372404608604  
LOC645254 39.3709357615493 39.3999056968598 41.785676764591  
45.4634652319753 40.4639532172338 43.0860383229288 42.629412460409  
46.695848687694 38.9006788676407 38.1042454705119 44.3763859390287  
41.0657892043496  
LOC645261 47.5647821785529 45.2556760873335 42.9104454767916  
55.2214187655851 53.6907197364586 46.263826584899 45.1017494688414  
46.3685439301234 50.2223403889892 45.0155543555707 49.4593570700221  
45.1735152121056  
LOC645262 40.0557788909923 40.4359177791566 41.8751578329365  
42.9358255168086 40.8873907150245 41.8613406887824 45.4799270968969  
43.5544347011646 41.5635499110307 37.8217989841918 38.956280281655  
39.0536056496869  
LOC645268 42.2455707947223 37.5469247328848 42.3536549114165  
44.1483976313959 42.6022652963326 39.132725377815 42.1607322031054  
36.9355798143571 44.4395580493118 39.7835513496873 40.8225507267584  
40.9683275553869  
LOC645273 41.3387790895716 39.6123051184545 45.4865173433646  
44.7980740332174 41.7929491793697 45.4882438975269 38.8417151851134  
43.9366081640576 40.4997186069494 44.4652605017595 32.9879066304034  
41.863927676552  
LOC645276 40.3478825593224 32.6416008433981 39.5450079747895  
35.0448343468967 37.7576900881741 42.8598805316863 40.1235656101329  
36.8400213077707 35.2143190355414 37.3179578037963 40.9157352260901  
38.5279745308203  
LOC645278 43.0001432913058 41.4508241771315 44.1452943804044  
40.3180310664156 40.4639532172338 46.6872654833579 46.9929836306816  
53.7378346199838 41.5635499110307 46.441301934328 44.2925355984056  
41.0657892043496  
LOC645279 45.7356815244513 37.7384958256497 46.0727230219512  
42.1273928203021 52.3242437351389 43.3785777889265 47.2927436772465  
42.0494116081998 43.8482802038826 40.7063426028871 45.1432412071268  
40.2669497398702  
LOC645282 50.0466349801009 43.5873188565519 44.8872784170036  
39.3750969348308 44.4489662507893 34.9849896310235 41.253645578517  
49.8344973836834 42.4540072551568 39.8873706855774 42.8263096141654  
35.2448979801094  
LOC645284 44.0328992213727 45.8669209716694 43.7630587657205  
43.074472921841 48.2748123114598 45.2852528185486 42.629412460409  
48.3590401011623 45.4799270968969 48.8623729374733 45.390192977585  
38.745552403895  
LOC645287 39.266565827316 31.8637059340657 44.7829632472754  
32.9046688061235 34.1686574241133 33.895835691032 32.4466419672036  
38.956280281655 40.6957787921451 39.2623423164488 38.5668610487033  
39.1553169409075

LOC645289 59.046385957117 50.4022543872993 57.2960245538881  
44.9370339275041 53.6907197364586 59.0686629877982 49.6872467499977  
52.7787010032051 57.1863195337055 55.9283039581662 55.6972661824064  
49.6629259325705

LOC645291 42.9641759692926 39.8455060654531 40.301483914446  
40.8681871019812 38.8834538955 41.0909708790194 42.6913548400127  
44.293922970134 42.2248608921879 44.3187284857534 41.9495387255163  
42.6758568421347

LOC645293 41.6354649482853 44.1239711172417 41.528370959196  
42.9358255168086 40.4639532172338 42.5660695551615 44.2166118829877  
45.2806199505029 42.5406888281114 42.4594149893798 40.1742127891824  
36.3454320848591

LOC645294 41.3387790895716 36.7976562409506 31.6419446793642  
38.745552403895 40.4639532172338 35.2067831864574 33.1392460259336  
36.6452480995946 37.7384958256497 36.9102644736882 32.9879066304034  
33.6902293666089

LOC645302 42.1537476443423 42.3550738181144 37.8386378737561  
36.6501141438378 42.6022652963326 39.2248354955045 41.5817737564592  
41.9315419791594 40.0403898620771 42.3606390470387 40.2649309204478  
40.4639532172338

LOC645304 48.8941062980393 35.2143190355414 38.8775560911841  
37.1894304543751 40.3452320167286 38.8336427948187 40.0052661202207  
43.6434576713809 43.7630587657205 42.4594149893798 47.3791873993182  
40.9683275553869

LOC645306 35.0202257459026 39.0102066700839 39.3709357615493  
41.7614975630362 44.4489662507893 35.314469458379 37.3799542961839  
34.1806289878747 41.2870505273664 35.2880714952489 38.2795150354677  
37.8490162439785

LOC645307 38.5648843914189 43.4396866157171 40.4882741869718  
35.8472302065546 39.0564222526273 36.4986986135769 46.3057385979341  
42.157627240486 47.7086093893038 44.8997235283254 45.0589947942306  
44.8372404608604

LOC645312 41.9407041937973 49.4982025424177 41.2365089689635  
40.4359177791566 41.5668884168669 48.0350549043063 42.4939802311136  
41.2551966132486 49.1940901905636 37.6383530120621 38.956280281655  
40.7704587752083

LOC645317 2779.37660132136 2237.08790397818 1327.93833415582  
1450.53108586858 2004.94135236716 1615.83220398811 1813.65521720537  
1723.37649434054 2126.41018877615 1199.29782389306 1541.9572099378  
1580.58484708669

LOC645320 46.0920218698606 37.10170285405 37.2838080935695  
41.1493778437527 41.7426502114261 37.0180934800573 38.2280071951674  
38.2782436497441 38.1658452457336 37.8592299544905 40.3180310664156  
39.1553169409075

LOC645322 37.4554876386402 37.4540772310118 39.4710743516517  
43.1847628331565 38.745552403895 40.5281496800812 43.8206425661746  
35.2642250366721 42.6366765186182 41.4397539024976 40.6373400186325  
43.2776458914333

LOC645325 43.0001432913058 34.7135536792489 37.5597671487621  
36.7892997857376 37.7576900881741 38.2293008890613 40.6750540874299  
38.5457716679071 37.8319142847141 36.8059561571675 38.745552403895  
35.5523662009011

LOC645330 49.1868644496737 47.1332119496722 45.7968648044613  
41.1886975241176 41.2740822675592 45.8325181856483 56.0515443021293

54.8412943008635 45.2897806651929 44.1379638573455 43.6629145624937  
43.9541718254769  
LOC645333 41.5421429082231 43.5873188565519 40.5734458834617  
38.5252456306656 35.9894133432376 34.9849896310235 39.5496902678788  
36.7460922671619 39.2809305246091 38.0078357808393 36.0481934423077  
35.2448979801094  
LOC645334 47.3791873993182 39.9697332660833 43.9450023643394  
45.0798408927912 45.9104478407175 46.7800033479223 42.357910063876  
42.0494116081998 50.7619345314571 44.1379638573455 47.7535797917441  
43.0930293831497  
LOC645335 34.6977013306396 37.920964499903 39.6451483836089  
43.3078542962968 46.3150221024046 36.9060997041453 44.0687697278114  
36.3405039629059 40.0403898620771 38.6454098044474 35.860430241131  
39.2469742642337  
LOC645336 48.4849194706125 43.1805016690297 39.0775870687758  
48.856176220627 46.9906120932727 42.5660695551615 47.2927436772465  
53.1052228246467 49.5539622682049 45.5776159432079 35.6970528713709  
43.1805016690297  
LOC645342 47.5647821785529 38.3322849790657 43.5710871617107  
38.8495095797881 36.7356360093603 34.3887641786747 37.2892641289258  
42.0494116081998 37.4540772310118 43.9450023643394 45.9104478407175  
42.9887069977696  
LOC645349 45.1912496459517 41.159706131351 46.8267540220952  
43.6726153508978 41.0885562160946 42.9695585740813 42.0605906240248  
44.4031868028216 53.9287524861617 39.7835513496873 42.357910063876  
43.2776458914333  
LOC645351 44.2350046179299 45.5842286511645 44.3344900481112  
42.357910063876 46.4343327861696 42.357910063876 60.9648845690177  
37.86982638952 43.6670755115848 47.611018474151 43.3085358214154  
49.2064066614865  
LOC645355 48.3814421939888 46.6314009405034 49.9256753636167  
45.0798408927912 47.4548471240051 46.0364000143537 50.6774883370457  
46.3685439301234 49.2879849674517 42.3606390470387 46.4205654140754  
44.2527566343661  
LOC645359 35.1307934330047 33.8237407699472 47.7737810047679  
37.4223289687135 35.7973685350741 34.1806289878747 42.1607322031054  
33.1477313087177 31.7734183346363 37.5343260962758 41.7272875295469  
37.9607839934735  
LOC645362 61.356483470053 55.6323803479191 60.1874689914535  
70.0402992940342 64.3571664944642 91.4446109489387 56.9320717885002  
80.1144023887293 51.8083208406279 71.9124897002253 82.6116645182046  
95.1224420992193  
LOC645363 42.5193208629123 41.8073910693411 40.0998167098057  
40.9607305725196 41.1868052124344 40.1428591998404 43.6753843488695  
37.1317006162938 41.2870505273664 41.8613406887824 41.6336636285875  
44.0451487108213  
LOC645364 37.7384958256497 41.9894412416874 38.1421709520616  
39.066284740632 37.3508690072156 34.1806289878747 37.4772922422734  
37.9837233601316 41.6616444147804 39.2623423164488 42.5426057453993  
49.2064066614865  
LOC645365 39.9697332660833 41.0678614026819 36.0306975524309  
43.3078542962968 39.4693871570028 36.4986986135769 38.7337086062875  
46.695848687694 41.863927676552 38.0078357808393 36.5359455830388  
37.0953622406687

LOC645367 36.3194282084339 75.0873720488265 44.7829632472754  
42.5193208629123 43.3332476888305 41.408887993053 56.7780520416533  
43.7630587657205 39.9444191873552 44.6305275729869 44.0527419856743  
53.0145811822111

LOC645373 44.9896851005259 43.2649781354792 45.310660704531  
53.0284011078097 40.3452320167286 47.9503724044453 47.4439407315335  
47.3791873993182 41.7627910693483 39.5637454855233 46.4753015651202  
41.7575097298927

LOC645378 44.0328992213727 47.5647821785529 43.8495248991589  
45.0798408927912 45.8051846088552 56.3525213736952 46.1634822993009  
43.5544347011646 56.432280646473 64.6446465846487 52.5154971256566  
53.9431600945419

LOC645385 1190.10462185567 1868.51164332659 1421.44237064813  
892.323580265478 1921.48678333837 2384.00264993279 1607.73526966988  
1473.52943897204 1945.33618761041 821.013687795434 1679.12630849964  
2417.02418518222

LOC645391 34.8099089553046 37.10170285405 42.2577689927563  
34.2080003860523 34.1686574241133 40.244271403831 38.4005795891396  
40.931294690669 35.4332080966594 36.5806287103157 35.4386677371439  
35.8429598823818

LOC645393 38.0089018744739 47.765848710116 40.1985790927248  
44.265834798964 39.3667161654772 43.0860383229288 46.9929836306816  
45.4757965005055 41.6616444147804 36.0481934423077 43.5710871617107  
41.9430737035925

LOC645396 41.0608773166058 38.5252456306656 41.3366779545815  
41.5464765641928 41.5668884168669 40.7616966228404 34.6720534245631  
38.2782436497441 38.5252456306656 36.9102644736882 34.7308008643142  
44.8372404608604

LOC645401 43.5710871617107 43.5873188565519 45.6989664108554  
45.334106390212 50.2163892855092 44.0804700754786 42.7431359850339  
44.6107027295193 43.4656637536244 44.6918600441328 45.5707650534259  
46.1592873342534

LOC645402 41.5668884168669 42.5660695551615 43.2721716572958  
45.1151758109609 46.3150221024046 44.0804700754786 43.5627649099623  
45.063792968927 45.5779686360641 40.4136535208406 42.7775752471711  
40.716553247236

LOC645408 41.6354649482853 37.1685072112618 41.1367478979484  
38.3166554965434 36.7356360093603 36.0306975524309 36.5352572191451  
36.8400213077707 40.4220196471124 40.4136535208406 39.0550139257658  
41.2437378488025

LOC645410 38.385865183581 34.8137085420423 36.0306975524309  
46.614092935749 35.9058393060637 37.2686490268265 35.3362091871364  
37.5511560880902 31.6295801599123 37.3179578037963 38.745552403895  
32.2133093774284

LOC645411 43.844855336215 45.5842286511645 44.8872784170036  
40.0698728584484 45.5809132232681 40.7616966228404 44.8643898647322  
41.7419877611072 43.2761454096265 43.7303813515864 49.1067959632109  
36.9976231206067

LOC645413 41.7397731376692 43.2649781354792 42.2577689927563  
48.4916117779992 39.9697332660833 42.8598805316863 44.8643898647322  
42.4580504587581 40.9901805728485 47.0055981216687 42.4580504587581  
41.5536168238478

LOC645416 41.2424637338424 42.3550738181144 46.4569566520107  
44.4367387274922 43.844855336215 44.7804080899431 41.0381860307445

50.7364620410977 38.8271346375425 47.3791873993182 43.401782064778  
41.3481355128089  
LOC645418 36.9060997041453 42.2577689927563 37.6557714476853  
38.2041059863839 37.3508690072156 44.2607789091176 40.3302268293707  
40.7311497914871 32.1218888714537 39.7835513496873 39.3667161654772  
30.1079759183823  
LOC645427 50.7390160399184 35.3307157989724 40.5734458834617  
43.1847628331565 39.3667161654772 44.7804080899431 43.3262148375525  
35.1738399826814 38.0213051227859 43.1839109702714 42.8263096141654  
39.0536056496869  
LOC645434 42.7150227340364 41.8073910693411 48.2883694323339  
40.5484717678957 42.0709558258414 45.9266745571724 41.0381860307445  
39.3709357615493 46.3203995372658 43.9450023643394 43.3085358214154  
46.6397391251762  
LOC645435 37.3463875295726 40.5400384479766 43.4709415392696  
44.9370339275041 43.6587492470348 36.2768299545794 41.8315602975157  
37.4484310268909 41.074824727477 36.8059561571675 42.170702295259  
45.3763275588341  
LOC645436 1969.8871504719 2465.65854657837 2306.14613042834  
1052.16097214718 2816.7754199004 2878.82618761804 1907.47560253019  
2021.38214786118 2354.00192115549 1141.25078954012 1910.5347560855  
2672.94421680196  
LOC645438 35.7012997405508 44.9370339275041 44.9758339877851  
47.0874209746031 49.32293280121 40.4359177791566 48.8319884367456  
48.0582855095143 43.4656637536244 46.1390887492649 40.8225507267584  
46.3411353377615  
LOC645441 37.5887129572848 42.0500582486532 40.7222199182322  
41.3567204694281 38.1042454705119 36.9625898230551 39.5496902678788  
39.3709357615493 42.0621425894624 38.4187686307607 42.3413611855132  
42.0709558258414  
LOC645442 45.6517320730042 42.7775752471711 42.4580504587581  
46.3203995372658 40.9950639693255 41.554942319225 54.0170817319522  
45.1714698794331 48.4869909888679 48.9826868640753 41.9083581529276  
40.4639532172338  
LOC645444 38.2083710281545 40.4359177791566 43.1931731665131  
41.8778873678551 44.7829632472754 42.4580504587581 38.7337086062875  
39.1652965788406 36.8127605061228 41.9666541498638 42.170702295259  
41.2437378488025  
LOC645445 39.9697332660833 44.2105195734073 47.3861758958576  
40.1804147506786 44.2607789091176 42.9695585740813 42.1607322031054  
42.8482181313226 46.6944238390932 42.785429206422 41.5421429082231  
42.0424641526302  
LOC645446 41.4508241771315 41.7337506166619 41.528370959196  
43.074472921841 38.3561682218911 43.6670755115848 49.2546642180676  
40.6171774724171 42.2577689927563 38.8507804383261 39.3667161654772  
45.2783024981315  
LOC645447 42.6561897411324 43.6601381712644 42.8270038153139  
43.4933087941017 40.7779767565889 43.6960408897486 40.9784333688086  
45.5051950394186 44.1519466943185 40.2669497398702 43.7924421812682  
47.7596919358651  
LOC645448 37.2474303302343 40.2493681589104 42.3536549114165  
42.1273928203021 39.5595233162192 40.7616966228404 31.8431345631453  
43.1567024035183 42.5406888281114 41.7405682794166 37.3687900733549  
39.2469742642337

LOC645450 33.5994525227062 35.9305494063137 33.8558232866797  
36.890925044696 44.2607789091176 39.2248354955045 38.8417151851134  
31.9468644542969 33.9456837661864 39.0648733099061 39.0550139257658  
33.4316681623175  
LOC645451 40.4639532172338 39.9697332660833 45.5883690965192  
42.6913548400127 41.1868052124344 47.9503724044453 32.9962272670005  
43.6434576713809 45.4799270968969 43.7303813515864 41.0050831223107  
41.6550823405646  
LOC645454 35.5179217192467 38.5252456306656 36.769073068743  
37.8442841690502 35.0181575202066 32.325260431418 37.2892641289258  
37.1317006162938 34.3842972343227 34.5718473203083 33.2774014136617  
30.3383368296776  
LOC645458 46.3390850717989 37.920964499903 37.4642807402741  
44.7980740332174 38.745552403895 37.5887129572848 44.3440839686558  
38.8495095797881 40.9901805728485 39.8873706855774 37.9946685306274  
40.8681871019812  
LOC645459 40.2543341073001 36.9994058279362 39.5450079747895  
42.8235313007746 41.5668884168669 38.2293008890613 38.4005795891396  
39.6474008369935 37.7384958256497 38.2069499294002 35.2339574411711  
39.9519547348106  
LOC645460 42.0532901689036 37.8217989841918 44.9758339877851  
47.8164193292842 41.2740822675592 43.8582747295766 43.0930293831497  
47.0940613507321 47.0804681460898 38.2069499294002 42.170702295259  
37.8490162439785  
LOC645463 40.3478825593224 36.4002279956519 41.3366779545815  
43.3078542962968 40.4639532172338 40.3357777530419 39.3585350448719  
37.6557714476853 40.4997186069494 40.4136535208406 41.9908237694988  
43.8575940017119  
LOC645464 48.5835484742456 36.7976562409506 38.8775560911841  
41.0726336841311 43.004943518025 46.0364000143537 37.7136011474903  
43.3262148375525 39.0775870687758 49.9493230064613 52.022479439889  
46.6397391251762  
LOC645465 46.9939712192224 46.4861258030402 43.0971787292711  
46.4555908533915 38.2496050953547 41.7627910693483 44.2166118829877  
49.085741080241 43.1805016690297 49.5265949137207 40.547835538778  
48.27609330316  
LOC645466 60.1705241170421 52.0268699306396 51.5292723244077  
80.5537984388921 59.5844022026141 74.9006142438341 54.8074655158941  
76.4637616585578 56.3441077510744 84.7642634532073 81.1350396749303  
81.6458112867541  
LOC645468 37.0320432433314 33.6902293666089 36.769073068743  
36.890925044696 37.0526522140242 35.2067831864574 35.9058393060637  
33.2467975244196 35.2143190355414 37.4302011516587 33.1645364749371  
35.0222940937513  
LOC645476 37.1485601150873 36.0366673493555 34.5718473203083  
43.074472921841 43.3332476888305 40.650742261428 34.9344532055397  
42.357910063876 33.8558232866797 35.4990901121893 42.170702295259  
39.6352613956998  
LOC645478 42.7150227340364 40.148780650831 39.0775870687758  
44.4367387274922 43.2484996523549 37.5887129572848 39.2533668167483  
42.2577689927563 41.5635499110307 43.0919221375514 40.8225507267584  
40.4639532172338  
LOC645481 46.6348258763289 45.1694246393676 39.1799070031819  
41.6564075217517 44.0451487108213 47.0940613507321 39.7576136507593

38.3684202018524 47.1744296124496 46.6598879466655 45.1432412071268  
37.2810767789306  
LOC645485 43.0930293831497 40.5400384479766 43.3085358214154  
42.1622837416589 37.6119337673806 41.2567470068038 38.7337086062875  
38.4540849632254 44.1211971585961 41.4397539024976 39.153226699662  
42.0709558258414  
LOC645487 42.2455707947223 41.2598458726002 41.9666541498638  
44.7980740332174 44.2607789091176 43.4681646416585 41.253645578517  
42.7431359850339 40.7847110517594 38.4187686307607 41.5421429082231  
40.3691324547049  
LOC645489 99.2824152850072 93.0251525517037 112.159199477006  
100.344513700137 102.49785018292 140.264270771578 82.3887053739195  
82.0102749744973 95.8075612515186 164.021467900956 133.1387411908  
112.727277807495  
LOC645492 48.9906383294199 42.8542642792862 40.931294690669  
48.856176220627 39.6535880152834 45.7300501624017 40.7910160811527  
43.4544762830742 50.1603795873336 39.6719190054379 40.723990462047  
40.9683275553869  
LOC645494 36.0144420013819 38.5252456306656 42.640829914102  
44.1483976313959 45.5809132232681 36.2015763253919 43.5627649099623  
42.4580504587581 42.7150227340364 38.528621456378 41.1638563416981  
38.4330755397458  
LOC645504 40.9558083259517 40.148780650831 38.6005272730664  
44.1483976313959 40.7779767565889 36.6271061451613 44.2166118829877  
45.5581356216957 40.4997186069494 42.0621425894624 42.8263096141654  
39.0536056496869  
LOC645508 45.3872406432794 51.4413099192899 50.5089777244781  
42.8235313007746 47.3172462673426 47.6803619768589 44.8643898647322  
39.1652965788406 50.7619345314571 39.2623423164488 42.357910063876  
51.138877923954  
LOC645520 41.2773842727759 37.7598032934773 41.7419877611072  
38.5707420487455 38.1042454705119 42.1046072075724 40.4359177791566  
38.4540849632254 40.0403898620771 39.2623423164488 39.3667161654772  
39.2469742642337  
LOC645522 42.0532901689036 37.920964499903 41.8751578329365  
50.2163892855092 44.5668141895992 39.3841861812262 38.7337086062875  
42.157627240486 39.9444191873552 41.2276963324981 36.131485826118  
45.0985088502363  
LOC645527 41.9407041937973 40.2493681589104 42.2577689927563  
41.6564075217517 41.1868052124344 41.0582900711341 41.9393838138203  
42.157627240486 36.8127605061228 41.2276963324981 45.9104478407175  
37.0953622406687  
LOC645529 43.6706764143908 40.716553247236 42.157627240486  
47.8164193292842 44.9936360641969 44.4619248757502 46.0228732507872  
44.5029690493211 38.6322728994674 44.2580151149956 39.153226699662  
43.8575940017119  
LOC645535 48.6621527194963 39.2907645923217 48.6037684272115  
43.8002456102021 43.4544762830742 48.3686935595826 43.5627649099623  
43.9366081640576 44.2607789091176 43.2988017098387 43.401782064778  
45.6692241948108  
LOC645537 39.9697332660833 38.8336427948187 40.4882741869718  
42.1273928203021 46.1804647841331 46.7800033479223 42.9803717121865  
41.5464765641928 38.8271346375425 43.7303813515864 42.5426057453993  
44.4475838947656

LOC645545 42.1537476443423 41.159706131351 46.1653991089885  
39.1706564265495 37.0526522140242 45.0882356578404 44.8643898647322  
42.5435283762933 37.2810767789306 39.5637454855233 42.911855821602  
38.4330755397458

LOC645550 47.5647821785529 80.6083247572711 51.4308501933893  
42.6913548400127 41.9842695818285 44.1737502492846 42.4939802311136  
55.421880601441 47.0804681460898 47.7180816682562 56.6086202928268  
53.840976437122

LOC645551 47.4678477186801 39.6995529770239 41.6977706798234  
41.8778873678551 52.4370718282084 39.9397419279057 43.5627649099623  
38.8495095797881 43.6670755115848 45.5776159432079 40.1742127891824  
41.863927676552

LOC645552 38.7537364570873 40.716553247236 34.9849896310235  
34.9221408381038 36.6354013629791 37.5887129572848 37.7136011474903  
38.6454098044474 38.8271346375425 40.2112371512838 35.3362091871364  
35.1451084093692

LOC645553 47.9175508887533 38.4330755397458 42.2577689927563  
47.9915414951747 42.6022652963326 36.9060997041453 44.2166118829877  
36.1375121409002 41.4636047919453 34.5718473203083 42.6366765186182  
42.1537476443423

LOC645557 34.8099089553046 34.9262464079777 38.9790184198145  
33.9645433044281 38.8456942580061 29.2731027042641 33.8558232866797  
29.4322896559759 37.0126425326534 31.4813677993933 37.0180934800573  
34.6720534245631

LOC645558 46.1673159982664 48.3077814647455 46.8267540220952  
48.3772965749984 48.9627346956003 48.6332750060224 58.2957814921605  
44.6511073781104 54.113533179847 50.4847465816184 47.7535797917441  
46.9867599298218

LOC645563 46.0023068797812 42.2577689927563 43.401782064778  
44.6905691366696 43.4544762830742 43.5752393599169 48.1747307200218  
47.2009420656854 49.7336769474446 50.7855742231932 41.1638563416981  
47.0130468198828

LOC645565 42.5193208629123 34.8137085420423 35.4484652445078  
36.0481934423077 37.1565984182084 38.4330755397458 36.3194282084339  
37.33030683349 34.9428206949566 37.7315666632629 33.6902293666089  
37.1747156131306

LOC645566 43.5710871617107 44.1239711172417 38.7745734037492  
34.9221408381038 44.3557408297309 40.7616966228404 49.2546642180676  
38.8495095797881 44.4395580493118 40.3235655331796 34.4716904283753  
44.7401523707775

LOC645574 48.8333989709933 44.1239711172417 42.4580504587581  
41.7614975630362 43.6587492470348 43.7630587657205 41.9393838138203  
41.1575777497576 40.8970401536578 46.441301934328 45.7328341667151  
46.2625470410195

LOC645576 46.3390850717989 38.0226905622357 39.1799070031819  
40.3180310664156 44.147557390293 36.8059561571675 39.8695929627783  
38.4540849632254 38.1169703906207 41.0057887014368 34.4716904283753  
43.4709415392696

LOC645580 44.8914371498528 41.554942319225 39.5450079747895  
38.8495095797881 45.3675390992851 41.9543948167375 43.8206425661746  
43.7396619462033 40.3316153483289 45.0155543555707 47.0110068985119  
45.7562276914441

LOC645581 41.483412492426 40.9731067463382 42.5864346233886  
40.591923288644 44.0977148249302 38.2971553419489 41.706879587091



43.3262148375525 41.7627910693483 40.5571841955033 41.5685493982342  
41.1868052124344  
LOC645582 44.436995101921 41.8073910693411 45.3974838013476  
42.1273928203021 46.7508829977587 39.7394181011603 48.6395795163502  
43.3262148375525 41.1742244762318 43.401782064778 42.357910063876  
43.4709415392696  
LOC645585 43.3638918705225 43.0971787292711 40.7620472083159  
42.6913548400127 44.8897737954573 45.3882138838137 46.3057385979341  
39.6474008369935 48.4869909888679 44.1379638573455 41.0808257270221  
40.1700117452801  
LOC645590 47.8249696958403 41.0678614026819 41.1367478979484  
60.1837189855762 40.5710637884029 47.5733603903505 43.5627649099623  
38.956280281655 49.3780606970538 45.3530683538086 43.0971787292711  
46.4499258373233  
LOC645600 48.0201377454632 62.5528124447176 94.1206342908306  
48.4916117779992 56.4685270445642 54.8265655909623 50.5252048155459  
49.6203214143464 82.0993943936197 56.685925255591 58.133863696399  
54.5921287593554  
LOC645602 34.4021554788966 34.8137085420423 44.4311655729487  
40.0698728584484 37.7576900881741 34.6977013306396 39.6535880152834  
44.1311654985682 43.0930293831497 42.4594149893798 41.9083581529276  
40.6614700944853  
LOC645609 74.6776631832355 80.257554904218 83.2925226467532  
109.615289274998 78.9088042058577 83.5274372175811 96.7125250803971  
60.1796637353976 84.9075858560758 65.429256309049 80.1419822448876  
64.3571664944642  
LOC645620 34.2180669723984 39.7835513496873 41.437237454134  
37.4223289687135 35.3327761997046 42.0574848021044 45.4799270968969  
40.2382908228517 39.9444191873552 36.9102644736882 40.4504608195666  
37.8490162439785  
LOC645626 39.8662795144616 48.275452803061 45.7968648044613  
41.7614975630362 45.8051846088552 46.574682061365 48.1747307200218  
40.6171774724171 44.4395580493118 55.6865353018811 49.532546810992  
53.0446815750355  
LOC645627 43.1805016690297 41.0678614026819 36.3604951341921  
42.6913548400127 39.0564222526273 36.1190722948669 42.4939802311136  
44.1311654985682 40.137818555383 43.4885245598939 41.1638563416981  
33.5578650644246  
LOC645634 47.0940613507321 44.4411734611229 46.1653991089885  
43.3078542962968 48.9627346956003 48.0350549043063 44.4639405506967  
37.9837233601316 53.838484549134 46.5650556481721 46.3370338074996  
49.5539622682049  
LOC645635 38.8561375693335 41.8073910693411 38.6005272730664  
52.8502823653368 44.147557390293 44.7804080899431 43.5627649099623  
42.5435283762933 45.2897806651929 44.6918600441328 39.4410515050885  
41.9430737035925  
LOC645636 49.4151347850687 44.6918600441328 45.989212296035  
44.4367387274922 46.8674366115656 47.2009420656854 47.8947595316832  
46.4672637826582 46.1101825640108 47.2299678280724 43.6629145624937  
46.2625470410195  
LOC645643 37.0320432433314 39.3999056968598 37.0642268327439  
37.4223289687135 34.806104801006 39.4953494583071 39.6535880152834  
39.7509165247419 36.3649677956953 41.6373771565199 35.7953070087288  
36.9976231206067

LOC645644 48.9906383294199 43.5182502375207 43.4709415392696  
46.7577982595088 44.8897737954573 46.3715909653832 45.223075311113  
47.5950227477807 42.9020321355927 42.9866214102525 46.2560238004757  
44.8372404608604

LOC645645 34.5886782974123 40.4359177791566 37.3687900733549  
35.0448343468967 33.5412189543102 37.2686490268265 44.3440839686558  
34.064698871541 38.3418933808844 34.6720534245631 32.8881500803623  
34.806104801006

LOC645648 33.4902421268456 46.8236022402545 37.7384958256497  
37.9875302985336 39.859345745831 53.8461734834857 41.706879587091  
38.745552403895 39.5806465938526 43.7303813515864 38.2795150354677  
37.2810767789306

LOC645649 45.4799270968969 45.2556760873335 44.9758339877851  
44.550322123994 43.6587492470348 41.2567470068038 44.7255207589606  
41.0381860307445 50.4974478884077 43.7303813515864 46.7386599624801  
41.7575097298927

LOC645651 37.2474303302343 45.3486182278177 36.2683886571585  
41.4273122914951 35.6434124419782 41.8613406887824 39.4600924554505  
34.064698871541 48.0163377492228 41.7405682794166 39.5399188536544  
39.0536056496869

LOC645652 38.8561375693335 35.6434124419782 37.3687900733549  
36.0481934423077 39.6535880152834 33.3470732872681 38.1793598983615  
36.7460922671619 40.0403898620771 35.4990901121893 37.9946685306274  
40.6614700944853

LOC645655 38.385865183581 41.3610369241157 43.401782064778  
41.4273122914951 41.6806984441849 45.2852528185486 40.5585676679482  
35.6825474397235 42.357910063876 45.0155543555707 40.547835538778  
42.6758568421347

LOC645659 42.7150227340364 49.3581578587582 43.7630587657205  
49.7350276169552 51.4527545197672 49.2050538150106 48.3411413510851  
40.831207953647 51.0062122023297 58.5087296620514 58.133863696399  
47.5025821041537

LOC645660 38.2083710281545 39.9697332660833 45.063792968927  
36.4564050256915 40.0599807618105 42.2577689927563 45.6042625176633  
44.0390019242862 39.1790517315259 43.844855336215 34.266241549578  
39.3575468494941

LOC645661 40.8681871019812 41.7337506166619 50.3950981988762  
44.9370339275041 43.3332476888305 38.7340969861754 39.6535880152834  
42.6450179841129 44.5303781239209 43.0919221375514 43.0016969050339  
40.8681871019812

LOC645662 43.3638918705225 44.9370339275041 41.0356368374708  
49.9014504704021 41.467005949568 50.0748292497578 42.7431359850339  
46.8954576545929 45.2897806651929 40.7063426028871 42.170702295259  
40.0557788909923

LOC645663 44.0328992213727 39.0102066700839 41.2365089689635  
48.665578118898 44.3557408297309 42.2577689927563 47.1345949868029  
44.2159020605784 41.074824727477 41.9666541498638 40.3452320167286  
46.7182294568603

LOC645669 39.3709357615493 41.554942319225 43.9450023643394  
42.6913548400127 43.3332476888305 43.8582747295766 46.4388841354122  
36.6452480995946 44.3440839686558 45.6868589181768 41.6336636285875  
44.2527566343661

LOC645671 48.8333989709933 46.7591817286632 40.5734458834617  
46.8954576545929 44.2607789091176 46.6872654833579 41.4742337714895

39.3709357615493 52.3579564953125 44.7958122466628 42.357910063876  
44.1452943804044  
LOC645676 43.1386380764095 42.6471103236957 45.1961735325439  
40.9607305725196 43.0723817756832 43.4681646416585 41.4216078366855  
41.2927600802729 46.2027193115397 43.128936937037 37.3255455874046  
39.0536056496869  
LOC645679 40.3478825593224 42.4493032770053 40.5734458834617  
37.8442841690502 41.7929491793697 38.4330755397458 50.0088611244948  
38.2782436497441 43.2761454096265 42.2614524730856 44.553780984244  
41.9430737035925  
LOC645681 43.0930293831497 41.159706131351 36.9795961564828  
39.853175885492 41.5668884168669 30.3383368296776 39.1539892144371  
40.7311497914871 37.4540772310118 38.1042454705119 43.9450023643394  
37.8490162439785  
LOC645682 38.8561375693335 44.0409178714232 40.931294690669  
42.0102671859606 50.2163892855092 39.132725377815 51.1541843174981  
36.0306975524309 36.2733735494625 38.745552403895 43.0971787292711  
39.2469742642337  
LOC645683 5811.22276358172 8349.59691588869 7681.71833395626  
6413.42384145372 9326.9018948838 10235.3288951482 6673.00322263275  
7911.19531717602 9181.13240708506 10235.3288951482 7911.19531717602  
9326.9018948838  
LOC645686 47.1962846565261 41.8848959280916 40.1985790927248  
39.6292788039793 41.0885562160946 41.4508241771315 35.6056062164318  
41.7419877611072 42.2577689927563 42.785429206422 41.7272875295469  
39.3575468494941  
LOC645687 36.8072833828297 44.2105195734073 39.9101908547397  
41.5464765641928 39.3667161654772 37.9003288112261 44.2166118829877  
41.5464765641928 42.6366765186182 41.1222709786153 37.6484782516569  
40.8681871019812  
LOC645688 597.996273468244 820.147156401172 731.670315613547  
714.990611155096 775.172777866283 1585.90718459092 681.474524031866  
821.013687795434 469.553640187203 1065.70206468134 974.296760034984  
1483.40077183826  
LOC645689 38.0089018744739 38.0226905622357 37.4642807402741  
48.4916117779992 36.3390947880186 32.771863438151 38.8417151851134  
39.853866204927 37.4540772310118 37.0320432433314 35.4386677371439  
38.1421709520616  
LOC645690 47.1962846565261 42.4493032770053 41.8751578329365  
36.890925044696 40.5710637884029 43.5752393599169 42.0605906240248  
46.7980335276155 43.5669306063196 40.2112371512838 41.9083581529276  
41.6550823405646  
LOC645694 39.8662795144616 39.0894172982439 36.6522278218553  
42.6913548400127 35.5220586859301 41.159706131351 41.3594868055879  
33.0038344711883 42.5406888281114 39.3698811593364 40.2649309204478  
40.7704587752083  
LOC645701 40.148780650831 45.2556760873335 40.5734458834617  
39.853175885492 46.1804647841331 41.0582900711341 39.3585350448719  
39.6474008369935 42.6366765186182 41.9666541498638 37.3687900733549  
45.9693232070002  
LOC645705 36.1232327599945 41.3610369241157 37.8386378737561  
41.4273122914951 37.2567512265363 39.132725377815 40.9157352260901  
44.293922970134 35.0305278582179 40.6022003765153 41.3553369544097  
44.7401523707775

LOC645708 40.9558083259517 41.554942319225 45.2313723727673  
39.9697332660833 37.6527901109005 41.9543948167375 38.7337086062875  
38.4540849632254 39.6609238036815 40.6022003765153 38.6662194645633  
38.9496515344837

LOC645711 40.2543341073001 39.9697332660833 45.5883690965192  
38.5252456306656 42.6022652963326 41.2567470068038 45.6042625176633  
41.9315419791594 45.0017158586743 46.0119912782855 43.1931731665131  
44.8372404608604

LOC645712 44.1294459089314 31.8637059340657 35.0970060242246  
37.0732977341185 37.2567512265363 38.4330755397458 38.8417151851134  
36.7460922671619 38.6322728994674 35.3849221682845 35.046946054314  
39.5418280570561

LOC645718 48.8941062980393 40.7952353240579 39.1799070031819  
39.2780515621926 44.3557408297309 50.8533737532786 40.6750540874299  
50.0526763693329 41.863927676552 40.7063426028871 39.5399188536544  
40.0557788909923

LOC645721 41.4508241771315 41.2598458726002 36.4564050256915  
52.1201052574162 41.3755760434934 46.8954576545929 40.3302268293707  
43.5544347011646 41.5635499110307 42.785429206422 39.8184668132023  
38.6454098044474

LOC645722 37.7384958256497 46.2286164776607 38.4043916290561  
43.4410741327254 41.6806984441849 49.2050538150106 48.9826868640753  
49.9332280449549 38.7298222155532 43.7303813515864 49.0361180089431  
44.7401523707775

LOC645723 51.0225132036905 45.6533175604486 39.9101908547397  
43.074472921841 50.7615314686244 47.3791873993182 44.3440839686558  
49.3880946790306 48.3954967265007 48.4890615340603 43.9450023643394  
45.0035308952466

LOC645724 39.6609238036815 40.5400384479766 35.7105247506212  
42.4580504587581 42.7982502551634 43.1826328292558 50.5252048155459  
44.9977782988116 38.2215591930186 47.2299678280724 41.2598458726002  
45.1735152121056

LOC645730 38.1169703906207 45.0115870036541 39.991353369336  
38.4208429103799 39.0564222526273 53.1052228246467 38.941855825269  
36.1375121409002 42.7150227340364 41.8613406887824 37.2018803984555  
43.7672102682067

LOC645732 43.3638918705225 45.0905928998779 46.5650556481721  
48.665578118898 49.9493230064613 43.2805590023412 42.7431359850339  
47.4740726032707 48.3954967265007 42.785429206422 42.2618615571566  
41.6550823405646

LOC645733 45.4799270968969 35.7393138893354 41.8751578329365  
45.7397504535169 36.5393857306744 54.1440452292081 47.2927436772465  
42.4580504587581 39.3750969348308 43.401782064778 57.7786197537899  
40.6614700944853

LOC645737 48.5835484742456 46.7591817286632 48.3847843498476  
49.3654837541353 52.0583273941813 52.1024135605001 45.223075311113  
45.1714698794331 50.0526763693329 55.3153799233744 48.5292718280498  
56.8534370691413

LOC645743 50.4872122867759 58.8281931439093 53.9612654850046  
47.6687908290818 70.5676924620725 58.4435847520801 59.0457625163577  
50.3972033014227 56.9320717885002 54.4825201506931 56.1379957867124  
49.7336769474446

LOC645745 43.6706764143908 43.0971787292711 40.301483914446  
43.4410741327254 39.3667161654772 44.1737502492846 47.1345949868029

44.6107027295193 42.992884918158 40.6022003765153 44.8872784170036  
38.3291713594599  
LOC645752 46.7293238583888 40.8880530359822 48.4890615340603  
38.5252456306656 40.9950639693255 42.0574848021044 45.4799270968969  
42.5435283762933 34.5633623842083 51.3351387089044 41.7272875295469  
38.1421709520616  
LOC645755 40.148780650831 42.5269793679335 36.8730514568925  
38.6414316877471 43.9450023643394 42.0574848021044 37.9430145836712  
37.2237132058632 41.074824727477 37.7315666632629 31.1853651446075  
41.1554481567603  
LOC645757 38.5648843914189 40.9731067463382 34.9849896310235  
39.9697332660833 36.2048942610546 33.3470732872681 32.6530576979948  
36.5393857306744 40.9901805728485 37.0320432433314 32.2133093774284  
42.4607795638552  
LOC645769 39.7162631015511 39.8455060654531 38.195965820384  
40.0698728584484 41.3387790895716 37.7427315853995 40.2601451506332  
40.2819379659218 38.0213051227859 39.2623423164488 39.3667161654772  
39.2839132447749  
LOC645777 42.442231667357 39.1982470626863 37.6557714476853  
39.853175885492 38.3561682218911 42.2577689927563 39.5496902678788  
40.3357777530419 41.074824727477 38.6454098044474 33.2774014136617  
34.6720534245631  
LOC645781 45.4507786740825 39.0102066700839 39.4710743516517  
40.6892234267786 42.7107928951766 42.9695585740813 40.8681871019812  
38.4540849632254 40.5912213523345 39.8873706855774 41.862634402486  
42.5365257225985  
LOC645783 41.3387790895716 39.6123051184545 39.4710743516517  
40.5484717678957 41.0885562160946 40.1428591998404 37.2892641289258  
39.853866204927 42.2577689927563 36.8059561571675 46.7386599624801  
41.6550823405646  
LOC645785 38.6454098044474 39.7835513496873 42.5406888281114  
41.8778873678551 38.5512429290626 43.3785777889265 43.6753843488695  
40.047314525032 40.8970401536578 42.785429206422 45.1432412071268  
36.7762265039864  
LOC645789 41.7397731376692 36.9994058279362 37.7384958256497  
39.3750969348308 36.9702228618069 36.8059561571675 39.3585350448719  
39.3709357615493 37.0126425326534 41.0057887014368 32.406093465115  
36.1647506311964  
LOC645790 45.2875173643252 42.9358255168086 44.6032218589199  
40.5484717678957 47.6884372645373 45.6129956328415 41.8315602975157  
44.6107027295193 39.4762546236449 44.2580151149956 44.7926323492519  
41.6550823405646  
LOC645797 44.5282181324797 43.1805016690297 42.8270038153139  
41.0726336841311 40.5710637884029 41.6590564937735 44.4639405506967  
44.8997235283254 42.1594905198929 43.401782064778 45.6348103033479  
42.2577689927563  
LOC645799 46.8954576545929 47.3536182445315 59.8037701388519  
43.8002456102021 50.8373208590626 48.4166623125005 45.6042625176633  
51.4360013601805 48.8842909466002 41.7405682794166 43.9063490244748  
46.4136802014079  
LOC645811 43.6706764143908 44.3529919625344 41.6079958749402  
47.0874209746031 43.844855336215 44.2607789091176 39.1539892144371  
43.844855336215 39.7537274655115 45.2556760873335 42.7275315121163  
43.4709415392696

LOC645812 41.1523487516364 36.0366673493555 43.8495248991589  
43.4410741327254 36.6354013629791 37.4782441311626 36.3194282084339  
38.2782436497441 35.5220586859301 38.745552403895 36.3390947880186  
33.0217499673686

LOC645818 44.0328992213727 40.8880530359822 47.7737810047679  
40.8681871019812 47.5647821785529 40.4359177791566 47.4439407315335  
43.3262148375525 42.992884918158 46.1390887492649 45.7328341667151  
42.7782216342806

LOC645835 43.9309845324767 37.2810767789306 40.931294690669  
43.1847628331565 41.3755760434934 44.7804080899431 41.4742337714895  
37.1317006162938 40.9901805728485 39.9948390976317 41.1638563416981  
40.7704587752083

LOC645836 35.2267149016596 45.4143854024453 41.785676764591  
43.4410741327254 42.4864576619427 41.6590564937735 43.8206425661746  
38.4540849632254 42.7150227340364 39.8873706855774 42.4580504587581  
39.1553169409075

LOC645837 32.3120809246762 41.159706131351 36.5474283500601  
36.4564050256915 45.4751076037511 41.3553369544097 43.9450023643394  
34.806104801006 35.7973685350741 38.745552403895 34.9428206949566  
38.3291713594599

LOC645839 40.3478825593224 38.5252456306656 42.157627240486  
43.5627649099623 39.2608760193011 40.650742261428 40.1235656101329  
32.7676164492555 37.4540772310118 42.1622837416589 34.5633623842083  
40.5703581862752

LOC645843 36.6480005877129 37.920964499903 38.1421709520616  
39.066284740632 40.2449343247539 43.5752393599169 37.1643693306382  
40.047314525032 37.2810767789306 36.9102644736882 40.1742127891824  
40.2669497398702

LOC645848 44.9896851005259 45.2556760873335 41.8751578329365  
49.7350276169552 43.3332476888305 47.0027453663546 43.1931731665131  
42.4580504587581 43.3744503319109 51.5855515705917 44.9713479185144  
40.1700117452801

LOC645850 42.9104454767916 41.4508241771315 42.7303139017786  
36.890925044696 41.5668884168669 44.2607789091176 57.4047331041592  
41.9315419791594 38.3418933808844 41.7405682794166 44.1148826235374  
45.9693232070002

LOC645851 39.7576136507593 34.8137085420423 38.3166554965434  
37.9875302985336 35.0181575202066 36.2768299545794 31.3222361955842  
37.9837233601316 32.9756367838345 35.4990901121893 34.9428206949566  
35.7451401627836

LOC645852 36.8072833828297 38.2263227947189 39.991353369336  
41.0726336841311 41.6806984441849 40.1428591998404 39.4600924554505  
39.9576138799997 32.2545725371494 40.3235655331796 42.7275315121163  
32.7800533388945

LOC645863 51.0225132036905 59.5534127075228 57.8111054584154  
46.614092935749 41.5668884168669 41.4508241771315 41.3594868055879  
51.4360013601805 45.9227107476843 55.5206840401643 54.7061116419212  
52.6922486991742

LOC645868 46.5549623118323 42.3550738181144 37.5597671487621  
47.6687908290818 44.0451487108213 44.5544727111028 41.4742337714895  
41.6466169548846 40.7847110517594 40.8970401536578 43.4709415392696  
42.7782216342806

LOC645869 37.9387791625384 41.554942319225 38.6005272730664  
37.8442841690502 46.7508829977587 41.8613406887824 45.4799270968969

41.6466169548846 47.4699236780425 35.7202909649682 46.2560238004757  
39.6352613956998  
LOC645870 41.6354649482853 37.8217989841918 39.1799070031819  
38.4208429103799 44.2607789091176 35.4142595025086 38.2933870238743  
40.831207953647 40.137818555383 38.8507804383261 35.2339574411711  
35.3525469364579  
LOC645871 40.8681871019812 37.920964499903 37.0642268327439  
35.314469458379 45.5809132232681 35.9305494063137 36.3194282084339  
36.43924066428 39.7537274655115 43.9450023643394 36.8282383070068  
39.1553169409075  
LOC645875 44.1294459089314 43.2649781354792 46.0727230219512  
52.1201052574162 44.7829632472754 44.2607789091176 54.6414321010929  
38.4540849632254 50.4974478884077 44.2580151149956 44.7926323492519  
39.8497227447888  
LOC645876 39.3709357615493 43.683792219729 36.5474283500601  
36.1562979552173 43.3332476888305 35.0970060242246 35.6056062164318  
37.5511560880902 39.4762546236449 38.745552403895 39.9899430628542  
38.0452862258803  
LOC645879 40.148780650831 45.3486182278177 43.7630587657205  
44.4367387274922 43.004943518025 44.7804080899431 43.6753843488695  
44.2159020605784 43.2761454096265 41.2276963324981 41.1638563416981  
43.1805016690297  
LOC645882 46.0920218698606 43.4396866157171 42.2577689927563  
39.1706564265495 39.0564222526273 48.260931742163 43.6753843488695  
39.2672712041774 37.6383530120621 40.1179210534118 40.4504608195666  
44.1452943804044  
LOC645885 38.1169703906207 43.9421822132391 49.3780606970538  
44.4367387274922 48.3814421939888 48.8744644207821 42.9803717121865  
44.8997235283254 45.7452456977857 42.1622837416589 45.2265319826548  
41.9430737035925  
LOC645888 50.6473771879221 46.3635803515159 51.7138050344355  
53.593974682612 44.6834648302383 47.2927436772465 47.5963750520409  
53.838484549134 46.2027193115397 49.8393069675192 50.1649089793069  
51.4308501933893  
LOC645891 35.8208542506595 38.7344853699576 38.3166554965434  
43.074472921841 36.2048942610546 38.2293008890613 38.2933870238743  
39.6474008369935 37.6383530120621 34.1648535095605 38.8507804383261  
37.8490162439785  
LOC645893 37.4554876386402 38.9338521051669 44.2405728317107  
46.8954576545929 33.7494761745342 43.1826328292558 48.4859552186772  
33.3307770183871 37.3600014814388 41.9666541498638 41.9908237694988  
32.3796054199032  
LOC645895 7168.83136860899 4015.88651424568 4784.36905964712  
4665.45637589484 2830.73694055758 2992.62035058532 5246.60459228386  
7980.71309230447 3421.24021192326 6089.64191751349 5776.17749026501  
5246.60459228386  
LOC645897 40.5654775358427 42.9358255168086 43.0971787292711  
39.5050383901884 43.1252272136667 40.244271403831 44.2166118829877  
39.5466975353131 41.2870505273664 42.6793753550854 41.9908237694988  
42.2577689927563  
LOC645899 4550.56817942699 5696.39636379286 5112.4354472796  
4986.44888767011 7075.82842238887 6413.42384145372 4216.69417265779  
5733.54417656207 6483.09366281532 9582.11974031559 8050.256095383  
6309.53691418065

LOC645904 46.5549623118323 49.7227563213678 44.0451487108213  
67.132092735265 56.4685270445642 43.4263583096036 64.9191509252662  
52.5586058896479 51.2776048338 58.5831897269778 51.949834638817  
44.9070250604284

LOC645908 40.148780650831 40.7952353240579 32.6121532029976  
39.5050383901884 44.4489662507893 44.0804700754786 42.9803717121865  
36.3405039629059 40.3316153483289 35.3849221682845 42.2618615571566  
39.9519547348106

LOC645914 41.0608773166058 39.2907645923217 36.3604951341921  
36.3604951341921 36.2048942610546 48.260931742163 39.8695929627783  
39.5466975353131 37.10170285405 38.3092241935352 43.1931731665131  
36.064718696392

LOC645915 45.1912496459517 43.5182502375207 41.6079958749402  
37.9875302985336 38.4540849632254 39.0266821712099 40.9157352260901  
40.1474543172332 45.0997987980157 41.4397539024976 45.8180710486329  
41.4508241771315

LOC645927 41.4508241771315 43.4396866157171 45.1569741609597  
48.665578118898 41.9842695818285 42.4580504587581 48.1747307200218  
43.7396619462033 41.074824727477 38.2069499294002 45.7328341667151  
45.0035308952466

LOC645929 38.0089018744739 37.1685072112618 41.6079958749402  
40.5484717678957 39.6535880152834 39.7394181011603 38.2933870238743  
36.3405039629059 38.2215591930186 41.5435611403119 33.6080693875435  
42.1537476443423

LOC645931 41.5421429082231 45.7979032939211 36.5474283500601  
46.4555908533915 44.5668141895992 43.6670755115848 40.5585676679482  
33.5578650644246 39.6609238036815 39.1621898366355 43.9450023643394  
44.3521099857368

LOC645932 44.436995101921 39.5050383901884 38.5045333213784  
40.3180310664156 39.9697332660833 40.3357777530419 45.7452456977857  
36.43924066428 36.9060997041453 40.8970401536578 41.7272875295469  
41.0657892043496

LOC645937 95.7571966348067 113.704541686372 146.311363191836  
88.1494891612632 111.877209777434 74.9006142438341 85.9692990407066  
68.2309359831273 85.5095013644374 82.3488166506716 76.2226219333049  
66.4626619269287

LOC645941 40.6559419616644 42.6939394537076 40.5734458834617  
50.0526763693329 44.9936360641969 39.2985791324641 47.8947595316832  
40.4359177791566 43.9450023643394 48.2596564318071 46.8954576545929  
42.0424641526302

LOC645942 50.315768338317 43.0971787292711 48.3847843498476  
44.6905691366696 46.6397391251762 46.7800033479223 50.0088611244948  
51.9447450229707 49.5539622682049 44.3648993568405 42.4580504587581  
46.1592873342534

LOC645946 40.3478825593224 44.5152708955623 39.7411455670172  
38.9534635879195 40.3452320167286 38.8336427948187 43.1931731665131  
45.1714698794331 40.4997186069494 41.4397539024976 40.9157352260901  
38.4330755397458

LOC645947 46.6348258763289 40.8880530359822 42.0621425894624  
40.7481155008596 40.5710637884029 40.5281496800812 43.1931731665131  
42.0494116081998 44.619512785899 45.1569741609597 41.0808257270221  
37.3600014814388

LOC645951 34.3473914754963 43.7644428186265 44.7829632472754  
42.5664883002833 40.9950639693255 32.2133093774284 36.634024014558



38.2782436497441 43.8482802038826 40.2112371512838 37.7384958256497  
40.8681871019812  
LOC645953 42.6036491382658 44.6918600441328 41.1367478979484  
44.4367387274922 37.956732373465 42.157627240486 41.8315602975157  
40.2382908228517 42.357910063876 43.6033221838149 38.8507804383261  
36.6603338274678  
LOC645955 43.9309845324767 42.9358255168086 50.3950981988762  
38.4208429103799 47.3172462673426 44.8872784170036 44.2166118829877  
43.9366081640576 42.7150227340364 45.0155543555707 46.0905079010237  
40.4639532172338  
LOC645956 39.5676051939342 39.6995529770239 41.528370959196  
44.9370339275041 41.0885562160946 38.4330755397458 40.0052661202207  
37.7612949798895 40.9901805728485 35.6208308220005 34.266241549578  
38.4330755397458  
LOC645958 41.0608773166058 38.0226905622357 33.281531405287  
34.8137085420423 34.5301949364147 35.6125439901743 38.2933870238743  
31.8679959015659 33.8558232866797 41.7405682794166 31.3983249770297  
33.2382077236252  
LOC645961 46.0023068797812 42.7775752471711 44.8872784170036  
45.0798408927912 41.7929491793697 41.8613406887824 50.6774883370457  
43.7396619462033 47.4699236780425 48.0211752672327 43.3085358214154  
43.1805016690297  
LOC645963 33.3307770183871 36.0366673493555 40.0998167098057  
39.7411455670172 37.3508690072156 36.4986986135769 71.193768715137  
58.5406981871153 44.1519466943185 67.9259304928255 72.768998788927  
72.4651758215622  
LOC645964 38.957687788868 35.4484652445078 38.1421709520616  
40.3180310664156 39.7568367479301 40.7616966228404 40.0052661202207  
40.4359177791566 38.8271346375425 40.8049408996274 38.8507804383261  
42.2577689927563  
LOC645966 47.2862299990938 42.9358255168086 44.7829632472754  
45.5869891570251 52.2089306840125 54.5952754712007 50.2016912396771  
43.7396619462033 42.9020321355927 41.6373771565199 43.844855336215  
43.2776458914333  
LOC645967 45.7356815244513 40.9731067463382 38.7745734037492  
46.8954576545929 47.6884372645373 40.4359177791566 44.8643898647322  
36.5393857306744 41.7627910693483 35.93950183586 39.9899430628542  
36.064718696392  
LOC645968 51.5033727579864 60.1102859845739 66.288032400574  
57.8277957325085 82.1344514651393 81.3978207813439 57.1070449050465  
60.6706478075023 67.0290776715331 72.834275688835 63.2684764441521  
117.260454792593  
LOC645971 34.8099089553046 40.5400384479766 36.5474283500601  
37.8442841690502 37.4470183315826 38.5252456306656 32.7676164492555  
41.0381860307445 34.226171989766 35.0668743708816 38.6662194645633  
33.8196020406676  
LOC645974 37.3463875295726 39.6995529770239 41.528370959196  
41.4273122914951 42.6022652963326 41.3553369544097 35.9894133432376  
36.8400213077707 44.7058233759912 43.2988017098387 39.7342718293432  
36.9976231206067  
LOC645981 42.0532901689036 40.7952353240579 41.528370959196  
38.6414316877471 44.6834648302383 39.4953494583071 42.2577689927563  
35.1738399826814 42.992884918158 40.2112371512838 38.8507804383261  
38.0452862258803

LOC645983 37.6397652536077 39.6123051184545 40.1985790927248  
42.357910063876 40.9950639693255 36.2768299545794 42.2577689927563  
44.797320243931 41.4636047919453 39.1621898366355 40.6373400186325  
39.6352613956998

LOC645986 38.957687788868 43.9421822132391 48.9944486068347  
40.5484717678957 40.0599807618105 37.9003288112261 40.2154497375715  
44.293922970134 40.9901805728485 35.93950183586 40.3452320167286  
39.9519547348106

LOC645992 37.4554876386402 33.3069622728735 35.9305494063137  
36.264823544143 36.08956004634 37.2686490268265 39.3585350448719  
33.8558232866797 34.7722083264266 37.0320432433314 37.2018803984555  
32.8921051249019

LOC645994 48.1125722136997 39.0102066700839 40.8420925848403  
45.7397504535169 41.5668884168669 41.0582900711341 36.4098694708483  
48.5681478665796 40.0403898620771 42.3606390470387 44.9713479185144  
45.0035308952466

LOC645995 38.5648843914189 44.2105195734073 43.4709415392696  
44.1483976313959 40.4639532172338 39.132725377815 40.1235656101329  
38.4540849632254 45.4799270968969 42.3606390470387 48.4717951775049  
43.5738557773903

LOC646003 43.7585538437696 44.4411734611229 45.5883690965192  
47.6687908290818 45.9104478407175 47.5733603903505 46.0228732507872  
44.0390019242862 41.7627910693483 43.2988017098387 40.547835538778  
44.8372404608604

LOC646004 43.6706764143908 38.8336427948187 41.2365089689635  
46.7577982595088 40.9950639693255 37.9951997351435 40.5585676679482  
37.2237132058632 36.8127605061228 43.401782064778 39.153226699662  
32.0636251428594

LOC646008 36.9060997041453 44.4411734611229 37.9482157381008  
46.4555908533915 37.1565984182084 36.2768299545794 41.0381860307445  
38.1835938174625 41.1742244762318 37.6383530120621 39.2542963855807  
41.7575097298927

LOC646009 44.0328992213727 43.8495248991589 40.5734458834617  
39.066284740632 36.4434672195785 38.1169703906207 40.7910160811527  
37.5511560880902 36.0741672064298 40.5090849993014 40.6373400186325  
44.4475838947656

LOC646010 44.8914371498528 44.3529919625344 36.2683886571585  
43.9282059368202 42.4864576619427 43.2805590023412 43.4544762830742  
43.2551508830106 38.7298222155532 48.2596564318071 42.0750889188255  
45.4799270968969

LOC646011 38.0089018744739 41.9894412416874 40.4070046183108  
38.3166554965434 33.7494761745342 40.8634043028528 41.253645578517  
36.7460922671619 36.8127605061228 39.2623423164488 34.9428206949566  
41.3481355128089

LOC646012 42.5534565507139 39.6123051184545 40.244271403831  
40.3691324547049 41.4397539024976 45.1411314881341 41.3594868055879  
42.8482181313226 40.8970401536578 40.2493681589104 43.7585538437696  
44.8872784170036

LOC646019 38.5648843914189 45.4143854024453 45.2313723727673  
41.0726336841311 44.9936360641969 43.6670755115848 46.3057385979341  
41.7419877611072 43.0930293831497 42.6793753550854 38.1835938174625  
43.1805016690297

LOC646023 45.5758521267508 43.0971787292711 49.5424425850549  
41.1886975241176 38.6454098044474 41.554942319225 37.830876898596

44.1311654985682 40.3316153483289 43.0919221375514 43.0971787292711  
36.064718696392  
LOC646026 48.4849194706125 51.3084273211359 48.7039705048129  
51.0175677516029 44.147557390293 46.4648868771662 48.8319884367456  
42.6450179841129 42.992884918158 47.8207974930031 48.4717951775049  
48.6795178347248  
LOC646029 42.6036491382658 39.5050383901884 40.4882741869718  
46.3203995372658 50.5110359971301 52.4351670989268 41.0381860307445  
40.1474543172332 40.2274522635576 41.6373771565199 41.0808257270221  
42.357910063876  
LOC646033 44.6231541342 39.7835513496873 41.528370959196  
39.3750969348308 48.8381507187986 37.7000400506818 44.0687697278114  
44.6107027295193 44.4395580493118 35.93950183586 38.956280281655  
38.6454098044474  
LOC646036 36.2496364442264 40.2493681589104 43.1931731665131  
40.8681871019812 38.5512429290626 34.8956628705329 32.6039814489621  
37.7612949798895 38.9006788676407 36.8059561571675 39.8184668132023  
41.9430737035925  
LOC646037 45.3872406432794 41.4508241771315 46.4569566520107  
39.6292788039793 43.4544762830742 43.9724628401189 42.0605906240248  
44.5029690493211 42.9020321355927 39.0648733099061 41.7272875295469  
42.6758568421347  
LOC646038 40.3478825593224 44.5152708955623 34.6977013306396  
37.9875302985336 44.9936360641969 36.1190722948669 44.4639405506967  
46.695848687694 42.7150227340364 38.528621456378 36.9060997041453  
40.4639532172338  
LOC646040 42.0532901689036 37.1685072112618 41.437237454134  
43.8002456102021 37.2567512265363 46.6872654833579 45.1017494688414  
41.8417024632349 43.5669306063196 45.5776159432079 39.9899430628542  
36.5474283500601  
LOC646041 38.304249186058 43.9421822132391 41.9666541498638  
44.1483976313959 39.3667161654772 42.0574848021044 38.1793598983615  
41.5464765641928 40.3316153483289 39.7835513496873 43.9450023643394  
43.8575940017119  
LOC646043 44.8914371498528 45.6533175604486 38.5045333213784  
41.3027031037343 40.7779767565889 34.9849896310235 40.1235656101329  
38.745552403895 32.7294532998931 36.2435874904689 49.7363778831003  
44.6484005362281  
LOC646046 34.6977013306396 42.0709558258414 34.9849896310235  
36.0481934423077 37.6527901109005 38.1169703906207 33.7574445386307  
32.0636251428594 38.4344387289956 39.3698811593364 41.9083581529276  
42.357910063876  
LOC646047 47.9175508887533 46.8236022402545 44.2405728317107  
49.1786207920603 48.6224651100733 41.2567470068038 46.5650556481721  
48.272324215504 43.3744503319109 42.2614524730856 42.6366765186182  
47.0130468198828  
LOC646050 39.6609238036815 40.0527893189096 46.5650556481721  
36.7892997857376 43.9450023643394 37.9003288112261 43.0930293831497  
41.8417024632349 44.5303781239209 43.401782064778 42.357910063876  
42.57175366709  
LOC646055 37.4554876386402 44.4411734611229 35.6139301508335  
42.0102671859606 37.1565984182084 35.9305494063137 33.1392460259336  
40.3357777530419 37.9273653326866 39.4710743516517 32.8881500803623  
36.449101775775

LOC646064 39.9697332660833 47.4740726032707 49.2041300973417  
45.8844325913247 44.147557390293 42.357910063876 38.8417151851134  
39.1652965788406 38.2215591930186 41.0057887014368 41.0050831223107  
44.0451487108213

LOC646067 43.4626049853157 41.2598458726002 44.9758339877851  
47.0874209746031 42.4864576619427 46.0364000143537 52.561573697155  
39.853866204927 36.8127605061228 45.0155543555707 43.844855336215  
42.6758568421347

LOC646071 42.7150227340364 40.3384318592985 47.646800205189  
50.8567345921473 41.467005949568 41.554942319225 39.5496902678788  
40.6171774724171 41.1742244762318 41.3321861371202 37.5583886316038  
45.6692241948108

LOC646074 41.1523487516364 50.0425298550559 47.3861758958576  
55.8709511400674 53.6907197364586 48.8744644207821 43.5627649099623  
50.5070012045444 42.2577689927563 46.8954576545929 51.0492389286271  
49.8253396161069

LOC646079 43.5710871617107 32.8881500803623 38.6727842796202  
41.0726336841311 38.4540849632254 37.8102105794655 40.0052661202207  
41.9315419791594 42.6366765186182 40.2112371512838 35.6970528713709  
37.1747156131306

LOC646082 45.4799270968969 42.2577689927563 41.437237454134  
41.7614975630362 42.6022652963326 48.260931742163 43.3262148375525  
44.9977782988116 43.8482802038826 44.4652605017595 39.2542963855807  
49.3087627580849

LOC646084 42.3433931248155 41.8848959280916 42.3536549114165  
50.5310598656998 50.5110359971301 40.4359177791566 39.7576136507593  
41.0381860307445 44.8003345643334 39.1621898366355 43.844855336215  
42.357910063876

LOC646089 42.7150227340364 40.8880530359822 41.6079958749402  
35.49696651597 38.2496050953547 37.8102105794655 41.706879587091  
35.9023742468744 39.0775870687758 39.3698811593364 39.0550139257658  
38.5279745308203

LOC646090 47.1962846565261 47.2770121962655 48.2883694323339  
47.9915414951747 39.859345745831 44.0804700754786 47.4439407315335  
54.5125550937898 48.0163377492228 45.6868589181768 49.2206713037152  
43.9541718254769

LOC646094 43.0930293831497 42.3550738181144 39.991353369336  
39.3750969348308 40.8873907150245 43.0860383229288 39.0458123429605  
35.0510338774593 43.6670755115848 45.2556760873335 35.6970528713709  
41.2437378488025

LOC646096 38.957687788868 42.3550738181144 40.301483914446  
51.7739270955254 42.6022652963326 37.2686490268265 44.0687697278114  
37.9837233601316 46.8873421271259 44.6918600441328 39.7342718293432  
43.2776458914333

LOC646097 43.1805016690297 43.3458769998118 42.8270038153139  
41.1886975241176 33.8558232866797 39.8455060654531 44.8643898647322  
42.357910063876 42.357910063876 37.0320432433314 41.0808257270221  
37.9607839934735

LOC646098 38.8561375693335 35.7393138893354 36.4564050256915  
42.9358255168086 40.148780650831 42.5660695551615 40.6750540874299  
48.3590401011623 33.8558232866797 37.3179578037963 38.2795150354677  
33.1559412791294

LOC646100 47.1962846565261 47.1332119496722 61.356483470053  
50.0526763693329 60.7495043977707 43.1826328292558 44.4639405506967

47.9942520395434 45.0017158586743 58.5087296620514 60.0765286625112  
49.7336769474446  
LOC646103 46.263826584899 46.1569135229922 43.7052389230253  
44.7255207589606 43.4812166409346 46.0867976914262 45.1017494688414  
41.6972107715212 42.0194325009671 43.6656890131156 45.452834313916  
44.6946363672948  
LOC646106 46.7293238583888 47.2055133646385 48.1331309338997  
57.8277957325085 44.2607789091176 42.6575535390785 50.8388984085636  
44.6107027295193 52.1788489555942 47.7180816682562 44.8872784170036  
50.7487159427973  
LOC646109 44.0328992213727 37.2810767789306 43.6670755115848  
39.7411455670172 42.6022652963326 41.4508241771315 39.3585350448719  
42.5435283762933 50.401623258584 40.1179210534118 45.310660704531  
43.9541718254769  
LOC646110 42.0532901689036 43.1805016690297 47.0055981216687  
40.646702696033 39.6535880152834 42.357910063876 44.9863726205428  
41.3506832276112 46.1101825640108 43.2988017098387 38.956280281655  
44.9070250604284  
LOC646111 39.5676051939342 44.0409178714232 42.640829914102  
35.6928955245309 43.004943518025 48.0350549043063 36.9355798143571  
40.6171774724171 54.0192060888782 42.785429206422 39.2542963855807  
40.1700117452801  
LOC646114 40.2543341073001 44.2105195734073 42.4580504587581  
45.1944222548351 46.4343327861696 42.8598805316863 45.1017494688414  
44.797320243931 48.2123120250343 45.5776159432079 40.547835538778  
46.7182294568603  
LOC646119 48.1952521496489 40.5400384479766 40.4882741869718  
48.1662933382789 37.3508690072156 38.1169703906207 37.0564573649223  
42.8482181313226 40.4997186069494 38.4187686307607 42.911855821602  
42.6758568421347  
LOC646123 52.2236479204029 49.2934904960601 70.6592421895338  
40.5484717678957 54.0126916508417 45.2852528185486 52.0942589368478  
48.7814131120945 49.2879849674517 58.8022152133979 63.9617548533553  
57.3697604614404  
LOC646128 36.2496364442264 44.0409178714232 40.301483914446  
42.8235313007746 54.9249759425252 40.1428591998404 43.6753843488695  
46.9986083378817 42.4540072551568 44.2580151149956 44.0409178714232  
40.2669497398702  
LOC646129 40.3478825593224 43.5873188565519 36.0306975524309  
34.2080003860523 36.08956004634 38.8336427948187 35.6056062164318  
42.9301944191913 40.2274522635576 38.3092241935352 35.860430241131  
35.4484652445078  
LOC646130 43.844855336215 42.2577689927563 40.8420925848403  
48.1662933382789 43.3332476888305 43.0860383229288 42.1607322031054  
41.8417024632349 44.7058233759912 43.0919221375514 46.2560238004757  
40.8681871019812  
LOC646132 49.540449125788 43.683792219729 45.6989664108554  
43.8002456102021 46.7508829977587 40.4359177791566 40.7910160811527  
44.1311654985682 49.5539622682049 41.7405682794166 45.6348103033479  
40.6614700944853  
LOC646134 44.3355304829989 43.4396866157171 42.3536549114165  
52.3004056941891 50.2163892855092 45.2852528185486 40.4359177791566  
43.3262148375525 45.8325181856483 43.844855336215 42.911855821602  
41.7575097298927

LOC646135 71.9062462001972 67.0402749076279 72.0243286940589  
98.7535408247698 74.5758811681995 72.4651758215622 91.983638239817  
55.8087097725119 68.6379135603075 64.428683021978 73.0247140074919  
72.1090339831747

LOC646139 39.7576136507593 35.1224289925572 43.3085358214154  
45.7397504535169 44.2607789091176 40.040778349137 38.2933870238743  
41.0381860307445 42.6366765186182 36.9102644736882 39.5399188536544  
39.8497227447888

LOC646144 44.6769095109555 49.2934904960601 44.5134109184888  
42.5269793679335 43.7517118200398 45.3882138838137 43.8973899364093  
42.8036731479932 47.4356803320662 41.3735882187951 42.4098506918871  
47.6534909074889

LOC646145 41.8409927585705 38.8336427948187 44.5134109184888  
42.1273928203021 40.2449343247539 40.040778349137 40.0052661202207  
44.5029690493211 44.8003345643334 43.7303813515864 41.6336636285875  
44.6484005362281

LOC646146 38.7537364570873 41.554942319225 44.6032218589199  
35.3829784221072 38.745552403895 37.5887129572848 37.7136011474903  
35.9023742468744 36.3649677956953 40.8970401536578 36.43924066428  
41.3481355128089

LOC646149 41.7397731376692 40.2493681589104 40.8420925848403  
45.7397504535169 36.3390947880186 40.1428591998404 40.9157352260901  
42.4580504587581 43.1805016690297 44.6918600441328 37.8372168909583  
41.0657892043496

LOC646154 37.6397652536077 38.6414316877471 46.0727230219512  
46.3203995372658 39.2608760193011 41.159706131351 49.3854238365325  
43.1567024035183 45.2897806651929 45.0155543555707 44.3763859390287  
46.0633179231318

LOC646155 36.7356360093603 41.2598458726002 44.5134109184888  
45.1944222548351 43.1252272136667 49.3172204533818 39.4600924554505  
37.33030683349 40.9901805728485 48.4890615340603 37.4642807402741  
44.6484005362281

LOC646156 42.1537476443423 41.8073910693411 38.6005272730664  
46.7577982595088 43.5544347011646 38.1169703906207 39.0458123429605  
40.047314525032 44.2607789091176 40.1179210534118 40.8225507267584  
39.5418280570561

LOC646160 39.5676051939342 34.2618170189676 39.0775870687758  
39.9697332660833 44.7829632472754 42.357910063876 43.0930293831497  
39.4710743516517 44.4395580493118 41.2276963324981 43.844855336215  
41.863927676552

LOC646162 37.0320432433314 39.2907645923217 39.9101908547397  
37.9875302985336 40.7779767565889 42.157627240486 39.6535880152834  
40.6171774724171 45.0017158586743 40.5090849993014 39.9899430628542  
43.8575940017119

LOC646168 48.8941062980393 42.6022652963326 47.2055133646385  
39.066284740632 38.4540849632254 44.5544727111028 45.7452456977857  
42.157627240486 40.2274522635576 44.6918600441328 41.5421429082231  
42.2577689927563

LOC646173 43.5710871617107 33.4316681623175 37.3687900733549  
42.0102671859606 38.0598374201407 38.5252456306656 43.6753843488695  
37.7612949798895 45.1899271235974 36.1550293353654 40.6373400186325  
40.0557788909923

LOC646176 37.55264801907 34.0382693188794 37.5597671487621  
32.1218888714537 31.9468644542969 32.6368705146258 32.2796484885898

34.064698871541 30.3212695028233 32.6203270051744 32.775958132716  
32.2133093774284  
LOC646178 51.1740855632044 52.683711208052 50.0748292497578  
47.2009420656854 53.6907197364586 53.2046867327331 49.8281348927244  
47.6952179922944 57.8772482723463 44.571915452417 50.2203578628217  
49.6629259325705  
LOC646179 43.0930293831497 41.6466169548846 51.1347974668251  
39.7411455670172 39.5595233162192 41.159706131351 36.3194282084339  
41.6466169548846 34.1294694030979 38.957687788868 41.1638563416981  
45.5800840647989  
LOC646183 40.5654775358427 43.2649781354792 40.7620472083159  
39.3750969348308 41.7929491793697 41.2567470068038 41.0381860307445  
43.4544762830742 43.2761454096265 41.3321861371202 42.6366765186182  
43.9541718254769  
LOC646190 37.1485601150873 46.29198852834 39.8299340037009  
41.0726336841311 46.9906120932727 37.8102105794655 35.6056062164318  
45.8669209716694 42.8036731479932 40.6022003765153 37.5583886316038  
41.1554481567603  
LOC646191 39.266565827316 41.159706131351 42.2577689927563  
38.8495095797881 40.148780650831 39.8455060654531 43.3262148375525  
40.1474543172332 41.2870505273664 35.0082729554459 39.153226699662  
38.3291713594599  
LOC646193 39.1590964332473 39.2907645923217 39.7411455670172  
35.9521941716188 37.5556299264699 35.314469458379 35.1307934330047  
42.157627240486 39.9444191873552 41.0057887014368 38.6662194645633  
39.6352613956998  
LOC646194 40.8681871019812 38.2263227947189 36.5474283500601  
38.6414316877471 32.5318884330468 37.5887129572848 35.2163900400329  
31.197411437683 38.2215591930186 34.4875013487777 38.079222289614  
38.1421709520616  
LOC646195 10483.5643876539 16661.6081002448 14226.3743910711  
10910.7672404363 18219.5845257111 12770.8282719641 9582.11974031559  
12456.731302703 15358.8899487375 18219.5845257111 18219.5845257111  
11795.0477101407  
LOC646197 128.281765653795 124.490684428024 112.007118067348  
89.6115806694241 139.620154641549 117.019543736429 127.043177339038  
109.029196594263 164.96500173066 113.090530993447 114.215602320391  
121.562769658314  
LOC646198 38.5648843914189 39.9697332660833 35.0970060242246  
37.5382094267692 37.956732373465 42.357910063876 34.9344532055397  
39.3709357615493 42.4540072551568 39.2623423164488 40.0766543123257  
38.9496515344837  
LOC646200 2126.41018877615 2225.65559724391 2266.34088015654  
2032.18819581205 3546.97585966225 3520.7579823657 1738.00955642263  
3749.78281766196 2633.34100695103 2745.8277126123 2678.43227619157  
3618.78958408675  
LOC646207 40.148780650831 40.9731067463382 42.157627240486  
40.0698728584484 34.6227169056411 40.244271403831 42.7431359850339  
44.1311654985682 41.863927676552 45.0155543555707 46.6442692119997  
47.6938628797168  
LOC646209 39.1590964332473 42.8542642792862 48.6037684272115  
44.265834798964 48.0234896130991 43.8582747295766 44.2166118829877  
42.4580504587581 46.1101825640108 43.401782064778 36.6298807161755  
43.7672102682067

LOC646210 46.441301934328 40.716553247236 47.3861758958576  
42.0102671859606 45.4751076037511 48.260931742163 49.1067959632109  
44.5029690493211 43.9450023643394 43.4885245598939 41.3553369544097  
43.2776458914333

LOC646215 31.197411437683 26.6357008041456 41.9666541498638  
33.8111782249716 36.08956004634 36.4986986135769 33.8558232866797  
36.7460922671619 37.8319142847141 36.9102644736882 37.1059647239814  
36.1647506311964

LOC646223 38.5007204246293 42.3550738181144 36.8730514568925  
32.0298369224145 38.4540849632254 43.8582747295766 39.1539892144371  
41.2551966132486 37.5469247328848 36.9102644736882 44.1148826235374  
40.2669497398702

LOC646226 41.6354649482853 34.15544299189 36.4564050256915  
41.8778873678551 38.0598374201407 32.771863438151 41.706879587091  
33.3307770183871 35.5220586859301 34.1648535095605 46.1673159982664  
37.3600014814388

LOC646227 38.5007204246293 43.9421822132391 41.0356368374708  
48.309866878365 42.1650127805175 43.8582747295766 43.6753843488695  
44.797320243931 36.8127605061228 45.7911932481722 42.357910063876  
44.3521099857368

LOC646236 39.5676051939342 41.2598458726002 38.6727842796202  
45.334106390212 46.5557478175976 42.5660695551615 54.339958888486  
45.4757965005055 42.1594905198929 39.9948390976317 45.0589947942306  
47.7962548556026

LOC646237 45.2875173643252 44.7829632472754 44.5134109184888  
42.6913548400127 40.4639532172338 44.4619248757502 43.1931731665131  
38.8495095797881 43.9450023643394 38.957687788868 39.9070785037411  
43.9541718254769

LOC646241 39.266565827316 33.5924201549249 38.8775560911841  
39.066284740632 37.4470183315826 41.6590564937735 36.4098694708483  
35.5798430594271 38.0213051227859 37.2089297656361 37.1059647239814  
39.3575468494941

LOC646243 42.7150227340364 40.4772513262052 44.696023817801  
43.4410741327254 42.1650127805175 41.6178506967511 45.7452456977857  
39.2248354955045 42.38204124321 44.7958122466628 40.0766543123257  
44.6484005362281

LOC646246 34.3473914754963 38.8336427948187 35.2838283525874  
37.8442841690502 31.8228237796461 34.8956628705329 35.4623691645629  
33.3307770183871 31.5151915411476 36.4651112441576 37.2018803984555  
35.9604262434141

LOC646249 42.442231667357 40.3384318592985 39.1799070031819  
36.890925044696 34.3633615460307 39.8455060654531 34.9344532055397  
37.7612949798895 38.2215591930186 40.2112371512838 37.6484782516569  
45.9693232070002

LOC646254 34.9138625012006 31.1853651446075 42.3536549114165  
45.0798408927912 44.147557390293 36.2015763253919 41.706879587091  
36.9355798143571 40.8970401536578 40.5090849993014 43.7585538437696  
45.0985088502363

LOC646256 39.0620487644635 45.1694246393676 44.3344900481112  
41.1886975241176 37.6527901109005 42.5660695551615 43.6753843488695  
41.5464765641928 40.0403898620771 42.8936990772838 42.2618615571566  
44.9070250604284

LOC646257 43.5710871617107 39.7835513496873 39.991353369336  
41.0726336841311 37.7576900881741 42.0574848021044 41.3594868055879



42.6450179841129 41.6616444147804 44.2580151149956 41.8168470823451  
45.8546719310325  
LOC646262 42.0532901689036 46.3635803515159 50.0050760710506  
54.6089451252049 48.2748123114598 46.7800033479223 47.4439407315335  
44.6107027295193 40.9901805728485 40.6022003765153 43.7585538437696  
37.4554876386402  
LOC646266 39.0620487644635 37.1685072112618 40.6737160001291  
40.9607305725196 43.004943518025 44.5544727111028 37.830876898596  
40.6171774724171 42.4540072551568 36.2435874904689 42.0750889188255  
35.6427313468066  
LOC646268 37.4554876386402 32.9795880920156 34.4716904283753  
31.5391275257362 33.5412189543102 37.0180934800573 35.9058393060637  
37.33030683349 35.7973685350741 37.2089297656361 36.0481934423077  
36.2582325396375  
LOC646276 43.9309845324767 42.5269793679335 45.6989664108554  
41.5464765641928 47.9128504683618 42.750861693377 45.7452456977857  
44.2159020605784 47.798305839406 47.8207974930031 41.0050831223107  
41.7575097298927  
LOC646278 46.1673159982664 43.7644428186265 45.6989664108554  
46.8954576545929 42.7107928951766 49.2050538150106 41.5817737564592  
45.3872406432794 41.1742244762318 44.3648993568405 40.547835538778  
42.4607795638552  
LOC646279 46.6348258763289 41.0678614026819 43.6670755115848  
46.0228732507872 41.2740822675592 40.8634043028528 42.629412460409  
39.0620487644635 49.4786466722535 43.7303813515864 40.0766543123257  
37.9607839934735  
LOC646280 40.2543341073001 42.1607322031054 44.7829632472754  
42.8235313007746 43.4544762830742 44.4619248757502 41.253645578517  
41.3506832276112 41.1742244762318 40.6022003765153 40.723990462047  
41.7575097298927  
LOC646283 38.8561375693335 42.0709558258414 40.4070046183108  
42.4580504587581 44.2607789091176 41.2567470068038 38.7337086062875  
42.7431359850339 43.0930293831497 44.6918600441328 42.911855821602  
39.6352613956998  
LOC646296 43.6706764143908 39.6995529770239 47.5673419710251  
41.8778873678551 45.6895223823001 43.8582747295766 40.6750540874299  
48.4670130605028 44.619512785899 43.844855336215 42.357910063876  
41.5536168238478  
LOC646299 45.4799270968969 42.6939394537076 42.4580504587581  
49.3654837541353 41.8806343997257 45.7300501624017 37.0564573649223  
40.4359177791566 39.3750969348308 41.3321861371202 40.1742127891824  
43.3744503319109  
LOC646300 42.0532901689036 39.6493706695391 38.741573807882  
40.1249533205858 39.4693871570028 40.040778349137 37.9430145836712  
39.1128725343972 35.4332080966594 40.4518431978241 34.5633623842083  
36.8209886489281  
LOC646302 40.0557788909923 40.4359177791566 39.0775870687758  
38.0958223740111 39.859345745831 39.3841861812262 38.2933870238743  
42.7431359850339 44.1519466943185 41.1222709786153 36.8282383070068  
38.0452862258803  
LOC646303 47.7267190613906 40.9731067463382 42.157627240486  
43.8002456102021 53.3086645804786 41.9543948167375 43.8206425661746  
41.7419877611072 43.5669306063196 46.1390887492649 44.1148826235374  
40.4639532172338

LOC646304 45.0985088502363 45.2556760873335 49.6347864008749  
42.9358255168086 40.2449343247539 47.0940613507321 41.4742337714895  
47.9942520395434 41.4636047919453 50.0564735608363 50.3221380889396  
48.27609330316

LOC646307 39.6609238036815 43.7644428186265 40.8420925848403  
41.5464765641928 43.1252272136667 40.7616966228404 46.1634822993009  
40.047314525032 44.5303781239209 36.5806287103157 39.5399188536544  
40.1700117452801

LOC646309 42.9104454767916 45.3486182278177 49.5424425850549  
84.8948024208923 41.1868052124344 53.0290605707162 52.561573697155  
44.1311654985682 43.9450023643394 43.2988017098387 45.1432412071268  
41.0657892043496

LOC646310 45.0985088502363 43.2649781354792 42.157627240486  
45.7397504535169 45.8051846088552 46.1513019317765 42.629412460409  
40.7311497914871 43.9450023643394 44.3648993568405 42.6366765186182  
39.5418280570561

LOC646312 37.3463875295726 42.6022652963326 47.9035532886869  
40.4359177791566 39.5595233162192 33.895835691032 39.5496902678788  
46.0633179231318 38.4344387289956 40.4136535208406 48.8744644207821  
44.6484005362281

LOC646317 46.441301934328 45.2556760873335 43.3085358214154  
50.5310598656998 55.1563703466328 46.0364000143537 44.7255207589606  
40.6171774724171 44.8997235283254 42.5664883002833 43.4709415392696  
35.5523662009011

LOC646320 44.1294459089314 41.3610369241157 43.1931731665131  
40.1804147506786 43.1252272136667 42.2577689927563 39.0458123429605  
46.4672637826582 42.992884918158 43.0919221375514 43.6629145624937  
39.2469742642337

LOC646324 44.1294459089314 39.1982470626863 37.4642807402741  
38.5252456306656 35.7973685350741 41.159706131351 41.253645578517  
41.2551966132486 35.3227485563945 36.6893251782922 37.6484782516569  
38.745552403895

LOC646331 39.6609238036815 38.0226905622357 42.7303139017786  
43.6726153508978 45.6895223823001 43.1826328292558 44.6032218589199  
42.4580504587581 44.619512785899 40.8970401536578 41.4508241771315  
38.9496515344837

LOC646332 37.9387791625384 43.1805016690297 42.2577689927563  
41.5464765641928 39.1650142708257 41.2567470068038 42.357910063876  
42.157627240486 45.1899271235974 34.8137085420423 36.0481934423077  
40.0557788909923

LOC646334 40.8681871019812 45.4143854024453 40.301483914446  
40.8681871019812 42.1650127805175 37.5887129572848 44.9863726205428  
43.0390857698452 46.6944238390932 47.0055981216687 36.43924066428  
40.5703581862752

LOC646335 38.7537364570873 36.4002279956519 43.8495248991589  
39.1706564265495 37.956732373465 36.2768299545794 33.9750800030909  
36.6452480995946 39.853866204927 38.528621456378 36.0481934423077  
35.7451401627836

LOC646342 38.5648843914189 37.2810767789306 40.4070046183108  
46.7577982595088 39.4693871570028 41.7627910693483 39.1539892144371  
39.6474008369935 41.5635499110307 41.3321861371202 40.3452320167286  
40.7704587752083

LOC646345 50.5670783769975 47.6229101519945 48.8100349749783  
42.4580504587581 44.4489662507893 66.5234828659154 48.1747307200218

45.9604707098953 46.6944238390932 48.3693338695392 44.7114813656401  
48.7814131120945  
LOC646348 41.0608773166058 39.8695929627783 39.8299340037009  
43.3078542962968 41.8806343997257 41.3553369544097 44.7255207589606  
42.357910063876 40.4220196471124 48.0211752672327 37.9230440150891  
42.7782216342806  
LOC646350 42.442231667357 33.3069622728735 39.7411455670172  
46.614092935749 41.1868052124344 39.4953494583071 38.0598374201407  
41.2551966132486 37.8319142847141 42.4594149893798 37.6484782516569  
42.2577689927563  
LOC646357 37.6397652536077 43.2649781354792 36.178547300352  
38.3166554965434 35.4484652445078 38.9378717994178 33.8558232866797  
43.0390857698452 36.3649677956953 44.0409178714232 36.6298807161755  
41.0657892043496  
LOC646358 43.844855336215 45.7979032939211 53.9612654850046  
52.8502823653368 53.1884505015411 46.574682061365 42.8684958525042  
50.857522488428 46.1101825640108 43.6033221838149 45.0589947942306  
47.6938628797168  
LOC646359 43.4626049853157 39.5050383901884 44.5134109184888  
46.1673159982664 42.3685136297603 43.1826328292558 46.4388841354122  
45.0972184964705 47.4699236780425 46.325232414659 44.4688999098904  
39.6352613956998  
LOC646360 48.0201377454632 38.4330755397458 43.7630587657205  
42.8235313007746 45.8051846088552 52.7156971154405 43.6753843488695  
46.5717043290731 47.27543600687 42.9866214102525 41.2598458726002  
40.5703581862752  
LOC646361 43.2724556187214 41.554942319225 37.8386378737561  
36.3604951341921 34.4570158133896 39.7394181011603 42.8684958525042  
34.6977013306396 41.6616444147804 38.8507804383261 41.3553369544097  
36.3454320848591  
LOC646363 45.9090659324223 43.0971787292711 45.310660704531  
42.4580504587581 44.0451487108213 43.3785777889265 39.7576136507593  
40.4359177791566 40.4997186069494 44.1379638573455 42.357910063876  
47.3172462673426  
LOC646365 37.2474303302343 43.0971787292711 52.9111155236961  
43.6726153508978 43.9450023643394 43.4681646416585 40.0052661202207  
44.5029690493211 49.5539622682049 41.2276963324981 48.2910530887214  
45.9693232070002  
LOC646366 41.7397731376692 38.6704566269103 41.7419877611072  
40.8681871019812 40.7273974755431 43.2805590023412 41.7614975630362  
40.5158867964016 38.9834959368496 42.8414096678708 39.3789825717286  
38.5921548841176  
LOC646372 43.6706764143908 43.0227387991135 39.1799070031819  
37.4223289687135 35.6434124419782 39.8455060654531 38.6243997507646  
41.5464765641928 38.0213051227859 39.9948390976317 35.5179217192467  
37.0953622406687  
LOC646373 38.5007204246293 34.3715326040967 39.6451483836089  
43.5627649099623 41.9842695818285 38.6414316877471 43.8206425661746  
34.2814697823693 43.2761454096265 40.4136535208406 41.2598458726002  
39.1553169409075  
LOC646374 42.6036491382658 41.9894412416874 37.2838080935695  
41.5464765641928 43.3332476888305 42.8598805316863 41.253645578517  
42.7431359850339 46.0106098064475 42.4594149893798 40.1742127891824  
41.5536168238478

LOC646376 38.1169703906207 40.8880530359822 38.8775560911841  
40.1804147506786 43.7517118200398 44.6524308640784 40.4359177791566  
42.0494116081998 41.074824727477 39.8873706855774 42.170702295259  
42.2577689927563  
LOC646381 44.8914371498528 47.3536182445315 44.8872784170036  
52.8502823653368 42.4864576619427 40.4359177791566 40.0052661202207  
45.2806199505029 46.2027193115397 39.1621898366355 45.2265319826548  
47.3992733452821  
LOC646383 45.6517320730042 43.0227387991135 49.9256753636167  
41.3027031037343 44.8897737954573 43.4681646416585 44.3440839686558  
50.5070012045444 45.3756389170606 56.057906531592 45.2265319826548  
43.1805016690297  
LOC646388 38.2083710281545 41.8848959280916 36.5474283500601  
49.3654837541353 38.4540849632254 38.5252456306656 40.6750540874299  
41.7419877611072 41.6616444147804 41.0057887014368 39.9070785037411  
42.2577689927563  
LOC646396 45.3872406432794 41.8848959280916 46.0727230219512  
52.6947911480086 45.1137938810047 45.9266745571724 42.7431359850339  
44.8997235283254 45.0997987980157 45.5776159432079 43.7585538437696  
45.0035308952466  
LOC646399 41.8409927585705 46.8954576545929 38.6005272730664  
41.7614975630362 39.2608760193011 40.8634043028528 41.253645578517  
38.1835938174625 36.0741672064298 43.844855336215 41.2598458726002  
40.7704587752083  
LOC646400 40.8681871019812 41.9894412416874 40.931294690669  
44.550322123994 40.8873907150245 40.1428591998404 43.1931731665131  
45.642304356051 46.9739160257217 42.9866214102525 43.5710871617107  
41.1554481567603  
LOC646401 41.6354649482853 40.7952353240579 38.0452862258803  
46.1673159982664 46.1804647841331 41.7627910693483 44.3440839686558  
40.5158867964016 47.0804681460898 44.0409178714232 44.553780984244  
43.2776458914333  
LOC646403 40.5654775358427 42.8542642792862 45.1569741609597  
42.4580504587581 40.7779767565889 44.4619248757502 46.0228732507872  
44.4031868028216 42.6366765186182 51.4454142248566 41.1638563416981  
42.9887069977696  
LOC646407 56.3471340054074 44.0409178714232 58.2986825661503  
50.7046706880325 83.1874704625702 44.3648993568405 55.0897019602305  
44.0390019242862 49.9162522057712 49.3000844711116 41.6657053704762  
40.9683275553869  
LOC646422 45.7356815244513 38.9338521051669 40.6737160001291  
38.2041059863839 41.9842695818285 44.0804700754786 46.8613212048981  
37.86982638952 41.1742244762318 41.1222709786153 41.5421429082231  
45.0035308952466  
LOC646424 37.7384958256497 38.4330755397458 37.2838080935695  
34.7266486944713 36.2048942610546 34.6977013306396 43.5627649099623  
37.6557714476853 51.2776048338 35.7202909649682 33.0553208959996  
37.4554876386402  
LOC646426 65.6556779936059 65.9098543816057 78.9701459806641  
57.8277957325085 79.1822591641672 71.5249259772583 58.0139597055449  
48.4670130605028 53.1249776278067 50.7855742231932 50.3221380889396  
60.5948704279864  
LOC646428 41.4508241771315 41.159706131351 39.6451483836089  
41.5464765641928 43.9450023643394 38.7340969861754 37.7136011474903

36.43924066428 37.0126425326534 40.8049408996274 45.390192977585  
45.4799270968969  
LOC646429 33.4240466670776 39.7835513496873 41.1367478979484  
32.2212308728305 38.745552403895 42.4580504587581 39.0458123429605  
37.86982638952 42.2577689927563 42.1622837416589 44.7926323492519  
38.8495095797881  
LOC646431 36.8072833828297 45.4882438975269 37.0642268327439  
38.6414316877471 46.8674366115656 33.895835691032 54.0170817319522  
40.7311497914871 40.4220196471124 41.7405682794166 44.2925355984056  
37.0953622406687  
LOC646434 49.8472708021525 47.765848710116 57.0427273538849  
53.8086134112366 53.0419743379342 46.574682061365 48.8319884367456  
44.797320243931 49.0986627051784 51.1169368198437 48.8088340735921  
41.3481355128089  
LOC646437 50.8388984085636 46.6314009405034 48.4890615340603  
64.5347406608537 55.4030910454028 48.7781962164988 53.3111230705754  
43.6434576713809 41.9635525160083 47.0055981216687 46.824299585607  
43.6753843488695  
LOC646439 44.1294459089314 40.0527893189096 35.9305494063137  
39.9697332660833 42.9090346219023 42.5660695551615 41.0381860307445  
46.1673159982664 42.5406888281114 34.1648535095605 38.4689132737495  
43.0930293831497  
LOC646442 40.4639532172338 44.6918600441328 40.6737160001291  
37.8442841690502 42.4864576619427 44.1737502492846 42.8684958525042  
41.0381860307445 42.357910063876 42.1622837416589 41.9083581529276  
40.2669497398702  
LOC646443 44.9896851005259 44.5884811528117 39.3709357615493  
43.8002456102021 34.2638875325204 44.4619248757502 43.0930293831497  
39.7509165247419 37.10170285405 47.2299678280724 41.8168470823451  
39.1553169409075  
LOC646444 43.1805016690297 49.83247261979 39.4710743516517  
49.7350276169552 35.6434124419782 37.7000400506818 38.4005795891396  
38.6454098044474 41.5635499110307 42.0621425894624 41.0050831223107  
35.9604262434141  
LOC646445 40.8681871019812 41.8073910693411 39.9101908547397  
35.7674462337723 42.6022652963326 37.1317006162938 38.4005795891396  
35.0510338774593 41.1742244762318 40.8970401536578 38.956280281655  
40.4639532172338  
LOC646447 45.2875173643252 39.1982470626863 38.8775560911841  
38.6414316877471 40.3452320167286 49.2050538150106 42.2577689927563  
44.293922970134 42.1594905198929 37.8217989841918 44.8872784170036  
41.7575097298927  
LOC646448 40.4639532172338 41.9894412416874 48.0191002461099  
44.265834798964 40.6723334103791 46.574682061365 43.5627649099623  
44.0390019242862 38.3418933808844 41.2276963324981 38.079222289614  
40.9683275553869  
LOC646449 44.7915315085948 39.0894172982439 43.0016969050339  
44.550322123994 46.7508829977587 40.040778349137 41.706879587091  
41.5464765641928 45.2897806651929 41.1222709786153 39.6403089864678  
43.0930293831497  
LOC646452 40.3478825593224 40.716553247236 47.7737810047679  
40.7481155008596 40.6723334103791 40.650742261428 46.4388841354122  
43.0390857698452 43.3744503319109 42.2614524730856 36.9060997041453  
43.9541718254769

LOC646456 40.148780650831 41.8848959280916 40.1985790927248  
45.7397504535169 47.0954207417646 37.9951997351435 48.8319884367456  
42.4580504587581 39.7537274655115 44.0409178714232 37.8372168909583  
38.5279745308203

LOC646457 46.6348258763289 40.3384318592985 48.0191002461099  
47.3574589211166 55.3100442506299 38.4330755397458 39.8695929627783  
43.0390857698452 39.1790517315259 41.2276963324981 38.4689132737495  
43.2776458914333

LOC646458 43.5710871617107 42.9358255168086 44.696023817801  
47.2009420656854 41.8806343997257 45.4882438975269 41.8315602975157  
42.157627240486 40.3316153483289 43.2988017098387 39.9070785037411  
41.1554481567603

LOC646461 41.6354649482853 41.159706131351 43.3085358214154  
40.0698728584484 40.148780650831 41.7627910693483 43.5627649099623  
39.5466975353131 38.9006788676407 37.4302011516587 40.2649309204478  
40.7704587752083

LOC646463 128.13619758592 115.519896726673 109.251112569215  
145.676955166566 127.345094323724 81.0880833950735 115.408418935236  
100.499763255098 160.755701876741 66.274247400793 74.6474346708746  
101.505513341316

LOC646470 48.1952521496489 40.7952353240579 43.9450023643394  
43.8002456102021 36.9702228618069 40.040778349137 37.2892641289258  
34.9580369221164 49.7336769474446 34.9138625012006 40.2649309204478  
36.1647506311964

LOC646471 42.1537476443423 43.8495248991589 39.6451483836089  
42.357910063876 40.7779767565889 43.5752393599169 41.9393838138203  
42.7431359850339 39.3750969348308 45.2556760873335 38.8507804383261  
39.0536056496869

LOC646473 42.2455707947223 38.3322849790657 39.5450079747895  
42.8235313007746 44.5668141895992 44.9896851005259 45.7452456977857  
39.9576138799997 38.1169703906207 46.1390887492649 45.390192977585  
41.2437378488025

LOC646481 48.6621527194963 40.9731067463382 40.4070046183108  
52.5307002738469 46.5557478175976 41.159706131351 44.7255207589606  
45.8669209716694 39.9444191873552 43.844855336215 38.8507804383261  
47.6938628797168

LOC646482 45.6517320730042 43.5873188565519 44.0451487108213  
45.334106390212 43.1252272136667 44.2607789091176 45.7452456977857  
44.4031868028216 41.7627910693483 42.1622837416589 43.401782064778  
45.8546719310325

LOC646483 2061.66570137425 2004.94135236716 2331.12401106076  
1638.16317738035 3143.97163345458 2944.3433949897 1533.38581753491  
1506.33570635551 2096.51999792183 2133.78836857697 2071.90741263566  
2588.47871581066

LOC646484 38.4330755397458 34.8137085420423 36.8730514568925  
39.6292788039793 38.4135023167287 37.5469247328848 39.8299340037009  
38.7215839727591 38.7298222155532 41.0057887014368 40.8225507267584  
38.5279745308203

LOC646486 39.8662795144616 38.3322849790657 37.0642268327439  
45.8844325913247 35.2163900400329 42.2577689927563 45.1017494688414  
39.2672712041774 38.7298222155532 35.6208308220005 40.0766543123257  
38.1421709520616

LOC646491 52.2236479204029 64.4837166864084 59.0308764112247  
57.2856683017619 100.034549511526 49.5424425850549 49.540449125788

57.5640428227111 52.0583273941813 48.4890615340603 70.8288090024328  
54.293880614303  
LOC646492 40.4639532172338 39.5050383901884 46.2625470410195  
41.3027031037343 39.7568367479301 42.9695585740813 45.6042625176633  
37.4484310268909 36.4476883897928 39.2623423164488 42.0750889188255  
40.0557788909923  
LOC646494 47.9175508887533 44.1239711172417 40.7620472083159  
49.3654837541353 43.7517118200398 48.4758590019384 41.5817737564592  
40.6171774724171 47.6195009345747 52.0999467564713 46.0905079010237  
47.6040671292013  
LOC646496 33.1666036387511 39.8695929627783 38.2280071951674  
43.074472921841 46.0977687311222 43.9724628401189 45.6042625176633  
36.43924066428 41.1742244762318 44.1379638573455 41.7272875295469  
42.6758568421347  
LOC646498 41.5421429082231 35.8227939208521 44.0451487108213  
40.8084239472012 42.3536549114165 42.0016830644258 39.9519547348106  
41.3506832276112 42.38204124321 43.5652644712197 44.5878355090414  
45.5342598239058  
LOC646501 38.304249186058 37.920964499903 40.4882741869718  
37.7469621225553 39.2608760193011 41.4508241771315 41.8315602975157  
42.8482181313226 41.074824727477 43.844855336215 41.3553369544097  
39.8497227447888  
LOC646503 38.0089018744739 46.5650556481721 41.6977706798234  
39.5050383901884 44.6834648302383 42.357910063876 40.4359177791566  
40.831207953647 41.9635525160083 47.0055981216687 45.1432412071268  
40.4639532172338  
LOC646507 44.3355304829989 44.8529259387308 40.301483914446  
36.9912468186322 38.0598374201407 38.8336427948187 36.197424053556  
41.6466169548846 42.4540072551568 44.6918600441328 36.5359455830388  
44.2527566343661  
LOC646508 49.6241203903354 46.6996902348633 51.3268475761593  
49.3654837541353 56.359578588344 52.7156971154405 48.6395795163502  
54.720204938924 51.8824384192988 52.8928296360463 46.7386599624801  
49.904979214379  
LOC646509 43.2724556187214 45.6533175604486 44.1452943804044  
38.5252456306656 45.2556760873335 47.5733603903505 41.5817737564592  
38.079222289614 48.1174861108648 39.4710743516517 36.5359455830388  
37.3600014814388  
LOC646512 40.7609952437622 43.9421822132391 38.9790184198145  
40.0698728584484 42.7107928951766 36.9060997041453 49.1067959632109  
44.5029690493211 47.7086093893038 35.195364621675 39.3667161654772  
42.7782216342806  
LOC646515 40.2543341073001 41.3610369241157 42.4580504587581  
43.1847628331565 50.6470461863549 39.7394181011603 48.6395795163502  
40.5158867964016 46.6944238390932 46.441301934328 42.8263096141654  
43.3744503319109  
LOC646519 48.6621527194963 38.1312950900467 39.7411455670172  
44.550322123994 39.9697332660833 40.4359177791566 43.9450023643394  
39.0620487644635 42.0621425894624 47.3791873993182 42.8263096141654  
46.3411353377615  
LOC646521 45.8108990837624 45.6533175604486 45.5883690965192  
51.949834638817 43.7517118200398 47.5733603903505 43.5627649099623  
47.0940613507321 45.2897806651929 46.0119912782855 42.2618615571566  
43.1805016690297

LOC646529 46.1673159982664 42.1607322031054 43.8495248991589  
44.4367387274922 44.147557390293 44.8872784170036 39.0458123429605  
38.745552403895 45.0997987980157 40.3235655331796 43.1931731665131  
43.9541718254769

LOC646531 2545.03032507597 3562.96193568469 2697.96877833185  
2598.78910128081 4093.70002166179 3838.19449971537 3634.98300564068  
2456.86796652313 3153.71394627237 1425.37639004849 1932.2647526188  
2220.90215179682

LOC646533 38.1169703906207 37.7384958256497 42.2577689927563  
41.4273122914951 38.1644569189523 38.1169703906207 35.4623691645629  
43.1567024035183 41.1742244762318 37.6383530120621 36.9060997041453  
40.9683275553869

LOC646537 41.6354649482853 41.9894412416874 38.3166554965434  
41.7614975630362 46.4343327861696 40.4359177791566 39.3585350448719  
37.33030683349 35.3227485563945 41.8613406887824 41.2598458726002  
36.1647506311964

LOC646549 40.9558083259517 38.4330755397458 34.0382693188794  
39.7411455670172 37.2567512265363 36.6271061451613 43.0930293831497  
36.6452480995946 37.4540772310118 36.6893251782922 36.7283081422707  
37.7526485343328

LOC646550 43.0001432913058 39.3999056968598 42.5406888281114  
42.357910063876 43.2484996523549 40.9506062495231 44.3440839686558  
40.2382908228517 41.1742244762318 42.9866214102525 44.553780984244  
41.4508241771315

LOC646552 37.1485601150873 38.2263227947189 35.0970060242246  
38.2041059863839 39.1650142708257 35.9305494063137 37.3799542961839  
42.6450179841129 44.8003345643334 39.4710743516517 44.7114813656401  
42.8864415494484

LOC646554 36.3649677956953 38.5252456306656 42.7303139017786  
36.4564050256915 39.1650142708257 36.1190722948669 41.706879587091  
35.2642250366721 38.9834959368496 41.9666541498638 36.7283081422707  
40.9683275553869

LOC646560 47.9175508887533 42.9358255168086 44.6032218589199  
43.4410741327254 41.3755760434934 41.4508241771315 42.7431359850339  
37.9837233601316 39.4762546236449 41.6373771565199 41.0808257270221  
38.6454098044474

LOC646561 43.4626049853157 39.6493706695391 37.4642807402741  
41.0726336841311 40.6308525754377 39.1664256481434 37.6502409810897  
40.7799172560245 39.0775870687758 33.3947143528313 35.6331082899192  
43.7672102682067

LOC646562 38.5007204246293 38.6414316877471 38.0452862258803  
53.2046867327331 42.1650127805175 35.9305494063137 41.4742337714895  
36.0306975524309 39.5806465938526 37.1275334308172 35.2339574411711  
39.0536056496869

LOC646566 34.3473914754963 44.0409178714232 42.7303139017786  
38.6414316877471 42.3685136297603 40.9506062495231 37.1643693306382  
38.745552403895 42.9020321355927 35.93950183586 37.2018803984555  
40.7704587752083

LOC646567 401.679080975109 315.487514440864 386.00975855841  
447.248719481853 498.958550919515 329.72032366183 232.628747594691  
147.405190988088 370.330147221688 126.071077511531 115.299308625328  
273.108672916862

LOC646568 44.2350046179299 48.8584917918986 47.2962360458401  
43.074472921841 48.9627346956003 45.6129956328415 43.8206425661746



46.1673159982664 49.7336769474446 42.8936990772838 43.5710871617107  
51.0647893605839  
LOC646569 46.5549623118323 43.2649781354792 49.3780606970538  
34.1051821768421 39.6535880152834 39.6251842352088 47.2927436772465  
46.2779564481158 43.1805016690297 43.6033221838149 41.9083581529276  
40.0557788909923  
LOC646570 47.1962846565261 39.0894172982439 43.6670755115848  
44.265834798964 40.6723334103791 43.4681646416585 41.8315602975157  
43.7396619462033 43.2761454096265 41.9666541498638 37.3687900733549  
45.0985088502363  
LOC646573 45.6517320730042 48.7084357480922 43.4709415392696  
46.0228732507872 41.8806343997257 51.0506441018166 46.7100796279384  
43.4544762830742 42.0621425894624 41.3321861371202 46.7386599624801  
43.2776458914333  
LOC646574 49.2595762436995 42.6939394537076 43.3085358214154  
40.5484717678957 41.0885562160946 47.8636003588181 45.223075311113  
41.5464765641928 40.4997186069494 44.4652605017595 39.8184668132023  
46.3411353377615  
LOC646575 36.4564050256915 38.6414316877471 38.8775560911841  
39.853175885492 39.6535880152834 42.6575535390785 42.8684958525042  
43.844855336215 41.5635499110307 47.2299678280724 41.6336636285875  
47.0130468198828  
LOC646580 40.9558083259517 40.5400384479766 37.5597671487621  
39.1706564265495 37.2567512265363 40.5281496800812 37.6036146841933  
45.2806199505029 42.992884918158 41.7405682794166 39.3667161654772  
43.4709415392696  
LOC646582 40.8681871019812 39.2907645923217 37.1643693306382  
42.8235313007746 42.1650127805175 42.750861693377 40.3302268293707  
45.4757965005055 43.0930293831497 41.5435611403119 43.1931731665131  
38.9496515344837  
LOC646584 40.4639532172338 37.8217989841918 45.5883690965192  
38.0958223740111 42.7107928951766 36.2768299545794 45.223075311113  
42.2577689927563 42.8036731479932 40.5090849993014 40.2649309204478  
43.1805016690297  
LOC646585 40.2543341073001 41.7337506166619 40.5734458834617  
39.853175885492 40.0599807618105 43.1826328292558 34.806104801006  
44.8997235283254 39.6609238036815 45.4614234442527 39.6403089864678  
44.8372404608604  
LOC646588 38.8561375693335 39.8695929627783 37.9482157381008  
39.5637454855233 36.08956004634 37.5887129572848 36.7892997857376  
41.4812544772644 42.38204124321 40.9558083259517 37.5343260962758  
37.6200174008473  
LOC646589 41.7397731376692 38.6414316877471 35.8265993915844  
41.0726336841311 40.5710637884029 36.1190722948669 39.3585350448719  
35.2642250366721 33.8558232866797 37.5343260962758 34.7308008643142  
43.4709415392696  
LOC646590 36.1232327599945 42.5269793679335 36.0306975524309  
38.5252456306656 39.0564222526273 33.0463640202858 38.4005795891396  
41.8417024632349 39.6609238036815 37.5343260962758 34.9428206949566  
36.7762265039864  
LOC646596 44.1294459089314 37.6383530120621 39.991353369336  
38.4208429103799 37.5556299264699 35.2067831864574 41.4742337714895  
36.6452480995946 37.7384958256497 39.6719190054379 34.8383995317036  
43.1805016690297

LOC646603 42.6036491382658 39.0102066700839 39.3709357615493  
47.3574589211166 42.6022652963326 39.132725377815 44.0687697278114  
37.9837233601316 46.7760357462635 43.0919221375514 42.170702295259  
45.1735152121056

LOC646604 42.5193208629123 41.3610369241157 41.6977706798234  
41.7614975630362 38.9496515344837 43.5752393599169 39.0458123429605  
41.7419877611072 41.3803269429468 44.571915452417 43.6629145624937  
41.9430737035925

LOC646607 41.9407041937973 42.9358255168086 49.3780606970538  
47.3574589211166 44.8897737954573 50.4022543872993 45.1017494688414  
50.3972033014227 46.8873421271259 48.8623729374733 40.4504608195666  
41.9430737035925

LOC646609 45.9090659324223 44.8529259387308 42.0621425894624  
44.7980740332174 47.3172462673426 44.8872784170036 44.0687697278114  
43.7396619462033 47.7086093893038 48.0211752672327 43.0016969050339  
41.863927676552

LOC646615 45.4799270968969 44.0409178714232 42.7303139017786  
39.853175885492 43.844855336215 42.9695585740813 47.5963750520409  
44.0390019242862 45.9227107476843 42.785429206422 44.9713479185144  
43.0930293831497

LOC646617 37.6397652536077 39.9697332660833 40.1985790927248  
39.9697332660833 44.7829632472754 39.2248354955045 40.4359177791566  
43.2551508830106 43.3744503319109 41.6373771565199 38.4689132737495  
40.1700117452801

LOC646625 36.1232327599945 33.4316681623175 40.8420925848403  
34.1051821768421 38.5512429290626 37.9951997351435 41.4742337714895  
36.8400213077707 40.6957787921451 36.9102644736882 38.5668610487033  
31.7413650507468

LOC646627 42.7150227340364 36.9994058279362 42.1901757067073  
43.1847628331565 45.7407938943718 41.159706131351 38.0598374201407  
41.1575777497576 45.0666179335087 41.9097689475185 37.3687900733549  
36.9162349182365

LOC646628 41.2424637338424 35.1224289925572 42.9104454767916  
36.6501141438378 42.1650127805175 40.9506062495231 43.6753843488695  
33.4534810696886 40.4220196471124 39.8873706855774 43.0971787292711  
34.806104801006

LOC646630 2393.42629339901 2300.20602168385 1442.72006787259  
1421.44237064813 1942.5006281841 1718.44944271916 1652.85734308754  
1480.95754707554 1868.51164332659 853.464809072841 1018.35211991691  
1433.1813604069

LOC646631 38.5007204246293 42.7775752471711 42.0621425894624  
43.8002456102021 41.1868052124344 41.8613406887824 45.223075311113  
43.1567024035183 49.641159251878 43.0919221375514 43.6629145624937  
42.8864415494484

LOC646632 46.8954576545929 43.5182502375207 45.6989664108554  
46.614092935749 44.4489662507893 46.7800033479223 55.5578334877425  
49.9332280449549 43.3744503319109 47.9056710878325 43.844855336215  
45.0985088502363

LOC646638 50.8388984085636 40.7952353240579 39.5450079747895  
58.9168466928565 43.6587492470348 44.3648993568405 37.9430145836712  
39.6474008369935 40.5912213523345 43.4885245598939 40.1742127891824  
42.4607795638552

LOC646649 40.7609952437622 39.2907645923217 42.3536549114165  
46.1673159982664 42.1650127805175 44.3648993568405 38.5066108855005

38.6454098044474 37.8319142847141 42.1622837416589 36.9060997041453  
40.3691324547049  
LOC646653 42.442231667357 51.0175677516029 42.2577689927563  
46.4555908533915 48.1473938886239 48.260931742163 44.2166118829877  
46.0633179231318 43.3744503319109 45.4614234442527 46.3370338074996  
45.3763275588341  
LOC646654 41.8409927585705 35.9305494063137 44.5134109184888  
42.1273928203021 41.7929491793697 37.7000400506818 38.2933870238743  
38.079222289614 40.2274522635576 41.6373771565199 40.0766543123257  
42.2577689927563  
LOC646663 41.4508241771315 38.8336427948187 45.5883690965192  
36.7892997857376 35.9058393060637 42.0574848021044 45.8980298854198  
41.9315419791594 46.1101825640108 45.6868589181768 39.6403089864678  
42.4607795638552  
LOC646664 42.0532901689036 39.6995529770239 45.063792968927  
42.2496337895968 42.4864576619427 39.2985791324641 42.357910063876  
39.6474008369935 38.4344387289956 43.9450023643394 39.7342718293432  
41.7575097298927  
LOC646665 47.6397712007919 45.1694246393676 43.1931731665131  
44.265834798964 37.2567512265363 37.9951997351435 40.1235656101329  
41.5464765641928 41.6616444147804 41.2276963324981 42.2618615571566  
41.863927676552  
LOC646667 50.2203578628217 46.29198852834 43.5710871617107  
40.8681871019812 45.9104478407175 42.8598805316863 41.9393838138203  
46.3685439301234 43.1805016690297 43.844855336215 43.4709415392696  
44.0451487108213  
LOC646670 45.9090659324223 40.2493681589104 45.989212296035  
44.550322123994 42.269054475455 41.4508241771315 49.6872467499977  
45.7476095696859 43.0930293831497 47.7180816682562 46.6442692119997  
38.0452862258803  
LOC646675 72.1408243034509 77.1737254584648 75.1477470681238  
63.7909104347097 84.3040298294164 78.5276518966943 64.232967574797  
75.4272782742534 85.0162042963215 49.4006068471301 55.9604109457703  
58.9069025298754  
LOC646676 39.1590964332473 41.554942319225 46.7508829977587  
40.0698728584484 67.222434502867 44.9896851005259 46.9929836306816  
50.1833483241864 41.9635525160083 51.3351387089044 50.6473771879221  
43.9541718254769  
LOC646677 43.6706764143908 46.7591817286632 44.7829632472754  
43.5627649099623 43.4544762830742 38.9378717994178 35.0305278582179  
41.8417024632349 49.8304479381623 35.93950183586 45.0589947942306  
45.2783024981315  
LOC646680 42.442231667357 39.3999056968598 45.6989664108554  
45.1944222548351 44.8897737954573 47.4699236780425 36.08956004634  
46.5717043290731 46.6944238390932 42.1622837416589 40.723990462047  
45.2783024981315  
LOC646686 40.4639532172338 42.4493032770053 46.3411353377615  
39.853175885492 47.0954207417646 42.4580504587581 46.1634822993009  
46.0633179231318 40.4220196471124 45.9004543328976 43.4709415392696  
41.1554481567603  
LOC646691 46.5549623118323 44.4411734611229 47.7737810047679  
52.5307002738469 43.6587492470348 44.6524308640784 45.3597029614942  
41.9315419791594 47.4699236780425 50.8826620053386 41.7272875295469  
42.1537476443423

LOC646697 42.8036731479932 45.4143854024453 44.2405728317107  
44.4367387274922 41.6806984441849 44.3648993568405 40.4359177791566  
44.9977782988116 40.8970401536578 45.9004543328976 45.4799270968969  
43.4709415392696  
LOC646698 42.0532901689036 44.5884811528117 39.991353369336  
41.1886975241176 42.7107928951766 43.1826328292558 45.7452456977857  
39.5466975353131 40.9901805728485 42.5664883002833 41.3553369544097  
35.7451401627836  
LOC646699 51.1740855632044 40.5400384479766 42.640829914102  
40.5484717678957 35.9894133432376 42.2577689927563 43.3262148375525  
41.2551966132486 45.8325181856483 39.9948390976317 37.5583886316038  
39.0536056496869  
LOC646703 43.7585538437696 40.5400384479766 41.1367478979484  
47.9915414951747 44.8897737954573 46.4648868771662 50.0088611244948  
41.6466169548846 43.8482802038826 49.5265949137207 42.0750889188255  
43.3744503319109  
LOC646706 36.4564050256915 36.6968906669565 39.2707964550441  
39.066284740632 36.4434672195785 36.9060997041453 39.0458123429605  
38.956280281655 34.7722083264266 41.1222709786153 39.2542963855807  
36.5474283500601  
LOC646708 37.7384958256497 44.8529259387308 44.7829632472754  
40.3180310664156 43.1252272136667 37.0180934800573 37.9430145836712  
42.9301944191913 42.992884918158 43.2988017098387 42.5426057453993  
35.8429598823818  
LOC646713 47.7267190613906 44.4411734611229 48.8941062980393  
40.5484717678957 41.467005949568 47.3791873993182 41.1507980856436  
45.4757965005055 42.992884918158 46.441301934328 45.8180710486329  
46.4499258373233  
LOC646714 39.5676051939342 37.7384958256497 38.4043916290561  
34.4382958501338 41.2740822675592 45.4882438975269 39.1539892144371  
37.6557714476853 41.4636047919453 44.3648993568405 36.9060997041453  
40.7704587752083  
LOC646716 38.6454098044474 43.3458769998118 42.3536549114165  
42.1273928203021 43.7517118200398 51.702461863489 49.6872467499977  
42.0494116081998 43.6670755115848 45.7911932481722 43.0971787292711  
43.1805016690297  
LOC646717 40.6559419616644 42.9358255168086 45.989212296035  
45.0798408927912 47.5647821785529 43.7630587657205 53.1884505015411  
50.0526763693329 42.2577689927563 41.5435611403119 43.0016969050339  
44.7401523707775  
LOC646719 39.6292788039793 35.860430241131 39.1480645318984  
35.0003436101724 40.4166536885831 37.0725935143353 43.1931731665131  
40.4639532172338 39.3506426665347 35.3849221682845 38.2795150354677  
39.6833800000587  
LOC646720 40.3478825593224 40.9731067463382 41.3366779545815  
36.4564050256915 42.1650127805175 46.8954576545929 43.9450023643394  
39.4710743516517 40.9901805728485 42.6793753550854 41.8168470823451  
41.6550823405646  
LOC646723 6673.00322263275 3176.96480659196 4058.32430616734  
126.14245679817 2745.8277126123 379.377005627283 4168.41947709165  
8144.52133665388 4277.93019582362 630.53864514662 1190.10462185567  
1076.05074395483  
LOC646730 42.1537476443423 41.3610369241157 33.7737772393677  
39.5050383901884 38.0598374201407 41.3553369544097 38.6243997507646

41.4508241771315 39.5806465938526 36.8059561571675 38.745552403895  
40.3691324547049  
LOC646731 34.0467249875782 38.8336427948187 35.2101597814352  
39.853175885492 39.9697332660833 36.2768299545794 34.806104801006  
39.2672712041774 33.6902293666089 33.7883338848419 40.723990462047  
33.4316681623175  
LOC646734 39.0620487644635 41.9894412416874 43.401782064778  
35.1451084093692 40.2449343247539 45.7300501624017 34.0777108441756  
39.5466975353131 36.3649677956953 36.8059561571675 40.723990462047  
44.2527566343661  
LOC646740 33.1666036387511 43.8495248991589 37.7384958256497  
43.074472921841 43.3332476888305 45.9266745571724 43.4544762830742  
41.3506832276112 40.0403898620771 42.0621425894624 41.0050831223107  
38.0452862258803  
LOC646743 43.5710871617107 38.9338521051669 37.8386378737561  
39.2780515621926 38.4540849632254 39.7394181011603 35.9058393060637  
36.5393857306744 43.1805016690297 35.93950183586 39.6403089864678  
42.357910063876  
LOC646746 43.844855336215 45.8980298854198 46.614092935749  
46.0905079010237 47.0954207417646 43.9724628401189 44.6032218589199  
45.9604707098953 43.8482802038826 52.1788489555942 45.8669209716694  
46.2625470410195  
LOC646748 43.844855336215 42.6022652963326 45.1569741609597  
42.5664883002833 37.8679241954337 42.750861693377 50.0088611244948  
41.3506832276112 43.5669306063196 45.4614234442527 40.9157352260901  
43.8575940017119  
LOC646750 41.2424637338424 49.6203214143464 47.2962360458401  
46.3203995372658 47.6884372645373 43.7630587657205 65.644767142472  
48.5681478665796 50.5785738734431 42.4594149893798 51.838002904753  
45.0985088502363  
LOC646762 37.3463875295726 36.1232327599945 44.3344900481112  
37.5382094267692 37.2567512265363 46.1513019317765 33.4316681623175  
36.5393857306744 36.6312676076142 38.957687788868 38.5668610487033  
42.2577689927563  
LOC646764 42.5193208629123 35.3307157989724 38.1421709520616  
39.853175885492 34.1686574241133 44.3648993568405 43.3262148375525  
37.4484310268909 39.2809305246091 43.7303813515864 37.9230440150891  
40.0557788909923  
LOC646766 2248.64628069362 2640.06306087033 1557.42399344934  
1780.14552702126 2663.19221471348 3484.65337999238 3166.48568397766  
2440.77408185413 1963.91365010531 2791.75465171135 2854.82112538867  
3021.24285327836  
LOC646769 39.0620487644635 37.1685072112618 45.6989664108554  
38.2041059863839 35.4484652445078 38.7340969861754 34.2773859804062  
37.2237132058632 36.9060997041453 35.2880714952489 41.0050831223107  
35.9604262434141  
LOC646772 37.1485601150873 40.3384318592985 40.0998167098057  
43.4410741327254 43.5544347011646 39.2248354955045 43.6753843488695  
42.7431359850339 43.5669306063196 45.1569741609597 39.6403089864678  
36.449101775775  
LOC646774 37.0320432433314 44.5884811528117 45.7968648044613  
48.856176220627 46.9906120932727 47.2009420656854 45.4799270968969  
46.3685439301234 44.8003345643334 47.3791873993182 43.6629145624937  
41.863927676552

LOC646778 46.7293238583888 43.3458769998118 42.4580504587581  
40.8681871019812 39.2608760193011 43.0860383229288 44.6032218589199  
46.7980335276155 46.0106098064475 43.844855336215 41.6336636285875  
45.1735152121056

LOC646779 47.8249696958403 40.4359177791566 41.0356368374708  
39.3750969348308 40.4639532172338 40.5281496800812 50.8388984085636  
43.3262148375525 46.4861258030402 41.1222709786153 40.1742127891824  
36.8690774823319

LOC646780 46.3390850717989 41.8073910693411 41.785676764591  
45.7397504535169 45.4751076037511 47.0940613507321 42.9803717121865  
42.357910063876 41.9635525160083 47.2299678280724 39.9899430628542  
49.1200355938198

LOC646781 40.9558083259517 35.7393138893354 41.528370959196  
37.7469621225553 42.7107928951766 40.8634043028528 41.3594868055879  
40.047314525032 41.4636047919453 38.2069499294002 37.8372168909583  
39.3575468494941

LOC646782 41.1523487516364 43.3458769998118 39.0775870687758  
41.5464765641928 40.5710637884029 38.7340969861754 46.0228732507872  
41.9315419791594 40.8970401536578 43.6033221838149 42.357910063876  
36.7762265039864

LOC646783 55.2182004838121 50.8812920005251 60.6567691532561  
49.7350276169552 55.0031529299037 51.6053353177789 57.1070449050465  
54.3820590274321 51.3511088648386 48.7414853386615 41.9083581529276  
48.0350549043063

LOC646786 167.05554959607 302.083293019113 205.24499293304  
175.114727506747 156.174166381986 221.847615564378 285.390768830888  
284.394749574694 77.5480089703916 224.030034866938 294.006023678979  
188.928047145068

LOC646793 34.3473914754963 45.0905928998779 39.6451483836089  
38.6414316877471 40.5710637884029 43.4681646416585 42.629412460409  
38.6454098044474 52.7512110769042 38.4187686307607 44.6286581923295  
43.3744503319109

LOC646795 41.8409927585705 39.7835513496873 40.6737160001291  
42.1273928203021 34.9062568194127 37.9951997351435 41.1507980856436  
38.3684202018524 38.9834959368496 40.5090849993014 33.9478220100351  
38.1421709520616

LOC646796 35.3227485563945 38.5252456306656 44.6032218589199  
31.8431345631453 37.8679241954337 39.3841861812262 34.806104801006  
36.1375121409002 38.0213051227859 42.6793753550854 43.0971787292711  
40.7704587752083

LOC646799 36.2496364442264 40.148780650831 47.5673419710251  
37.8442841690502 37.956732373465 38.3418933808844 37.830876898596  
35.1738399826814 33.9456837661864 33.6188027862739 33.7948557837079  
38.0452862258803

LOC646803 47.9175508887533 42.0709558258414 40.4882741869718  
42.357910063876 43.3332476888305 42.6575535390785 42.4939802311136  
43.0390857698452 46.581796165231 48.1392888470269 40.6373400186325  
48.0350549043063

LOC646804 44.8914371498528 37.920964499903 41.3366779545815  
36.6501141438378 40.8873907150245 41.554942319225 37.9430145836712  
41.3506832276112 46.4861258030402 40.1179210534118 46.3370338074996  
39.4490233720848

LOC646806 38.5648843914189 36.4002279956519 46.2625470410195  
40.9607305725196 45.2556760873335 36.4986986135769 44.7255207589606

39.3709357615493 45.7452456977857 39.0648733099061 42.7275315121163  
40.7704587752083  
LOC646812 41.3387790895716 42.4493032770053 43.4709415392696  
44.6905691366696 41.1868052124344 46.3715909653832 40.7910160811527  
41.4508241771315 42.5406888281114 41.5435611403119 38.6662194645633  
40.1700117452801  
LOC646813 37.9387791625384 47.9665737016961 44.4311655729487  
41.5464765641928 42.3685136297603 38.7340969861754 42.2577689927563  
46.695848687694 39.7537274655115 37.5343260962758 45.7328341667151  
39.8497227447888  
LOC646817 53.8856501960117 63.1780854659428 58.0218262176065  
47.6687908290818 86.033725825968 60.7488007939604 65.7873990226533  
52.0503062610092 61.2510119532409 41.1222709786153 43.5710871617107  
59.5080588072694  
LOC646818 38.957687788868 39.0894172982439 42.7303139017786  
37.7469621225553 32.6463318577756 41.7627910693483 40.5585676679482  
44.797320243931 37.6383530120621 37.3179578037963 38.745552403895  
42.357910063876  
LOC646823 38.1169703906207 40.5400384479766 35.8265993915844  
37.9875302985336 44.8897737954573 38.7340969861754 44.2166118829877  
36.0306975524309 41.6616444147804 41.2276963324981 37.2018803984555  
37.9607839934735  
LOC646825 44.1294459089314 48.109747794187 43.0971787292711  
45.7397504535169 44.7829632472754 48.8744644207821 45.3597029614942  
44.797320243931 43.5669306063196 48.3693338695392 40.8225507267584  
41.863927676552  
LOC646829 39.4710743516517 43.3458769998118 47.0055981216687  
43.5627649099623 39.7568367479301 45.3882138838137 41.3594868055879  
36.1375121409002 38.3418933808844 40.6022003765153 35.2339574411711  
42.0424641526302  
LOC646835 39.3709357615493 41.6466169548846 39.5450079747895  
37.9875302985336 38.9496515344837 38.6414316877471 43.4544762830742  
40.4359177791566 43.2761454096265 41.4397539024976 37.6484782516569  
45.8546719310325  
LOC646845 41.9407041937973 40.7952353240579 38.8775560911841  
39.1706564265495 39.3667161654772 42.8598805316863 38.5066108855005  
41.9315419791594 43.9450023643394 39.3698811593364 36.6298807161755  
39.9519547348106  
LOC646848 44.7915315085948 39.6995529770239 45.3974838013476  
40.646702696033 40.8873907150245 32.325260431418 43.8206425661746  
43.0390857698452 44.4395580493118 40.4136535208406 39.9070785037411  
39.1553169409075  
LOC646849 218.552143403657 167.273775508231 233.692490031492  
145.526972410673 249.889110678139 351.039814818516 153.310447977094  
248.744491123257 321.069136463599 153.177725521199 171.5709313654  
331.762920362224  
LOC646853 51.0225132036905 45.7317208802318 47.9035532886869  
40.3180310664156 42.7107928951766 49.8472708021525 50.3519150282938  
50.9933795450314 49.1940901905636 53.5498255316009 48.8744644207821  
46.1592873342534  
LOC646855 39.9697332660833 47.8400694856726 38.8775560911841  
37.4223289687135 42.9090346219023 39.7394181011603 37.6036146841933  
44.6107027295193 42.6366765186182 39.5637454855233 41.1638563416981  
40.9683275553869

LOC646858 47.1962846565261 37.3634897565502 46.4569566520107  
44.0451487108213 50.2163892855092 53.4466111440611 40.4359177791566  
43.4544762830742 44.2607789091176 44.0409178714232 46.1673159982664  
43.8575940017119  
LOC646861 37.55264801907 41.0678614026819 39.8299340037009  
39.6292788039793 33.3231576795423 43.4681646416585 40.7910160811527  
45.8669209716694 35.6970528713709 41.0057887014368 33.6902293666089  
45.1735152121056  
LOC646862 44.1294459089314 41.9894412416874 39.1799070031819  
52.5307002738469 43.1252272136667 51.0506441018166 44.2166118829877  
41.8417024632349 40.2274522635576 43.6033221838149 40.6373400186325  
42.357910063876  
LOC646863 49.085741080241 42.2577689927563 42.7303139017786  
41.0726336841311 44.9936360641969 43.3785777889265 41.3594868055879  
42.9301944191913 39.2809305246091 45.0155543555707 37.7384958256497  
41.6550823405646  
LOC646864 40.3478825593224 39.2907645923217 41.437237454134  
41.7614975630362 42.7107928951766 39.9397419279057 43.9450023643394  
41.5464765641928 39.3750969348308 42.2614524730856 39.5399188536544  
35.9604262434141  
LOC646867 44.3355304829989 41.2598458726002 45.4865173433646  
46.0228732507872 48.0234896130991 44.9896851005259 41.8315602975157  
47.2864663693787 43.9450023643394 50.0564735608363 39.6403089864678  
46.917149434588  
LOC646869 39.3709357615493 40.2493681589104 46.7508829977587  
40.1804147506786 45.5809132232681 41.554942319225 40.0052661202207  
42.8482181313226 49.8304479381623 43.4885245598939 41.3553369544097  
38.745552403895  
LOC646870 41.5421429082231 39.9697332660833 44.1452943804044  
42.9358255168086 41.9842695818285 42.2577689927563 39.3585350448719  
44.1311654985682 45.8325181856483 43.0919221375514 44.8872784170036  
42.8864415494484  
LOC646871 39.6609238036815 38.7344853699576 39.1799070031819  
39.1706564265495 38.5512429290626 42.2577689927563 36.197424053556  
37.9837233601316 41.074824727477 34.9138625012006 40.547835538778  
36.064718696392  
LOC646879 37.9387791625384 44.4411734611229 41.1367478979484  
48.1662933382789 43.844855336215 44.3648993568405 42.0605906240248  
48.7814131120945 40.7847110517594 53.7196173866021 43.9450023643394  
45.8546719310325  
LOC646881 40.148780650831 44.8529259387308 43.3085358214154  
45.4634652319753 45.9104478407175 44.4619248757502 50.0088611244948  
46.8954576545929 48.3119523820103 49.9493230064613 40.1742127891824  
42.2577689927563  
LOC646882 37.4554876386402 40.2493681589104 36.0306975524309  
37.8442841690502 36.2048942610546 37.5887129572848 35.2163900400329  
35.6825474397235 33.3643994200057 35.8304004211528 36.6298807161755  
28.5895665533366  
LOC646887 39.8662795144616 38.3322849790657 40.5734458834617  
40.8681871019812 41.6806984441849 42.157627240486 48.8319884367456  
37.6557714476853 48.5792058061372 45.7911932481722 37.1059647239814  
43.5738557773903  
LOC646888 40.8681871019812 40.716553247236 38.8775560911841  
44.0451487108213 44.3557408297309 37.1317006162938 40.4359177791566



43.7396619462033 39.2809305246091 51.8412522234186 40.4504608195666  
43.6753843488695  
LOC646890 41.7397731376692 42.466333667839 40.0998167098057  
41.8291484190524 40.5710637884029 42.0016830644258 45.7452456977857  
41.0381860307445 40.8970401536578 43.3465699185405 38.5252456306656  
41.3481355128089  
LOC646892 41.5689645295284 42.7275315121163 41.6079958749402  
37.9875302985336 40.4166536885831 36.4986986135769 38.6492234339227  
37.9837233601316 41.3468610075772 39.8455060654531 37.9553529562144  
42.7275315121163  
LOC646895 38.4330755397458 40.0145811166794 42.5890635915791  
42.1273928203021 39.3999056968598 40.7616966228404 45.7452456977857  
42.0494116081998 41.5635499110307 42.7275315121163 42.2618615571566  
42.1537476443423  
LOC646897 58.7404123614695 50.6229884142872 47.4740726032707  
51.0175677516029 46.0977687311222 51.1621379498014 56.4809146784765  
68.3372228877569 47.1744296124496 57.6791750431251 59.8509516999438  
60.2550788540864  
LOC646900 56.1912096308988 57.5941849631773 71.7336217321663  
66.5921967967793 61.3077641493507 56.4819802857598 58.3675164086197  
83.4679576894911 69.6511571901941 60.399253022569 54.113533179847  
67.6138276415458  
LOC646903 36.0144420013819 37.8217989841918 38.6727842796202  
45.5869891570251 35.1411239266238 40.040778349137 46.5650556481721  
37.33030683349 42.0621425894624 42.785429206422 35.1470994647364  
41.2437378488025  
LOC646905 34.9138625012006 36.5219488315447 32.771863438151  
34.1051821768421 37.7576900881741 40.244271403831 35.1307934330047  
37.9837233601316 32.9756367838345 37.8217989841918 38.2795150354677  
37.4554876386402  
LOC646906 41.2424637338424 42.1607322031054 39.991353369336  
45.1944222548351 38.6454098044474 39.9397419279057 39.3585350448719  
43.7396619462033 48.5792058061372 42.8936990772838 40.6373400186325  
37.8490162439785  
LOC646908 40.0557788909923 39.7835513496873 42.4580504587581  
37.0732977341185 39.1650142708257 39.2248354955045 39.4600924554505  
37.4484310268909 36.2733735494625 41.9666541498638 36.2435874904689  
42.0424641526302  
LOC646914 39.8662795144616 38.7344853699576 41.0356368374708  
41.1886975241176 41.467005949568 42.9695585740813 46.1634822993009  
41.3506832276112 45.0997987980157 45.0155543555707 43.0971787292711  
38.6454098044474  
LOC646915 49.2595762436995 43.9421822132391 52.7005092555102  
45.1944222548351 45.1137938810047 56.0477607422828 51.5967098638347  
47.8947595316832 49.641159251878 55.7930787690756 54.5711704180349  
50.379587451669  
LOC646917 38.2083710281545 41.8848959280916 44.0451487108213  
42.8235313007746 40.3452320167286 43.5752393599169 39.8695929627783  
40.931294690669 40.3316153483289 40.1179210534118 40.9157352260901  
38.9496515344837  
LOC646918 36.6480005877129 37.1685072112618 41.437237454134  
40.4359177791566 39.859345745831 41.9543948167375 42.629412460409  
43.6434576713809 39.5806465938526 40.8970401536578 39.8184668132023  
36.6603338274678

LOC646920 40.4639532172338 48.8584917918986 45.8844325913247  
52.8502823653368 55.9283039581662 48.0350549043063 54.0170817319522  
42.5435283762933 43.9450023643394 46.8954576545929 46.1673159982664  
44.4475838947656

LOC646926 48.3814421939888 46.4861258030402 42.2577689927563  
44.0451487108213 41.2740822675592 47.7556758818053 47.1345949868029  
39.7509165247419 42.4540072551568 44.6918600441328 42.6366765186182  
42.357910063876

LOC646931 39.6609238036815 37.1685072112618 39.6451483836089  
39.1706564265495 44.3557408297309 37.9951997351435 43.6753843488695  
43.1567024035183 38.1169703906207 39.4710743516517 39.4410515050885  
38.9496515344837

LOC646932 42.6036491382658 43.683792219729 42.157627240486  
38.0958223740111 40.0599807618105 39.132725377815 43.0930293831497  
46.1673159982664 37.7384958256497 44.8997235283254 45.7328341667151  
42.357910063876

LOC646933 40.5654775358427 41.0678614026819 41.785676764591  
42.357910063876 37.1565984182084 34.5886782974123 37.7136011474903  
39.4710743516517 36.197424053556 34.2638875325204 37.1059647239814  
39.4490233720848

LOC646938 47.4678477186801 51.9421032049606 55.8810837854139  
54.8412943008635 50.6470461863549 56.2736599756843 63.0119737420787  
53.6210959113222 50.0526763693329 49.8393069675192 51.3861659123096  
50.2163892855092

LOC646939 38.7537364570873 42.5269793679335 37.4642807402741  
41.7614975630362 43.004943518025 43.3785777889265 38.5066108855005  
35.6825474397235 39.5806465938526 45.5776159432079 40.8225507267584  
37.8490162439785

LOC646943 35.5179217192467 39.5050383901884 35.2101597814352  
39.853175885492 33.6330903323612 34.8956628705329 37.0564573649223  
35.3608605269276 38.7298222155532 35.0668743708816 31.7413650507468  
37.1747156131306

LOC646946 36.3649677956953 39.3999056968598 44.696023817801  
48.1662933382789 36.08956004634 44.0804700754786 38.8417151851134  
39.6474008369935 43.3744503319109 40.2112371512838 40.9157352260901  
44.3521099857368

LOC646947 39.266565827316 36.2103905554984 37.3687900733549  
33.9645433044281 34.0045980663271 38.1169703906207 33.9750800030909  
36.43924066428 36.0741672064298 34.064698871541 41.5421429082231  
35.9604262434141

LOC646951 42.1537476443423 38.1312950900467 38.6414316877471  
42.4061338151892 43.3332476888305 39.8455060654531 37.7136011474903  
43.490078970589 42.5864346233886 39.1832968442811 41.5421429082231  
39.9941474864076

LOC646960 43.0001432913058 37.1685072112618 39.5450079747895  
41.3027031037343 37.7576900881741 43.8582747295766 35.2163900400329  
50.3082459161777 40.137818555383 48.1392888470269 43.6629145624937  
38.6454098044474

LOC646970 43.3638918705225 36.89524015739 35.8265993915844  
40.646702696033 40.148780650831 40.040778349137 39.0458123429605  
41.5464765641928 45.5779686360641 37.5343260962758 41.9908237694988  
35.7451401627836

LOC646971 41.1523487516364 41.3610369241157 37.6557714476853  
42.1273928203021 37.8679241954337 39.0266821712099 41.0381860307445

44.7044140979108 40.137818555383 46.7646877499666 40.6373400186325  
46.1592873342534  
LOC646976 41.6354649482853 43.3458769998118 42.157627240486  
44.0451487108213 44.2607789091176 43.2805590023412 44.2166118829877  
47.5950227477807 45.3756389170606 39.4710743516517 41.9908237694988  
41.0657892043496  
LOC646981 44.6231541342 38.7344853699576 45.989212296035  
39.6292788039793 40.3452320167286 44.1737502492846 47.4439407315335  
41.6466169548846 42.7150227340364 37.3179578037963 41.2598458726002  
40.8681871019812  
LOC646982 43.5710871617107 44.2105195734073 37.8386378737561  
40.0698728584484 38.6454098044474 34.8956628705329 39.4600924554505  
46.7980335276155 36.4476883897928 42.785429206422 41.6336636285875  
45.3763275588341  
LOC646990 56.4553747079294 50.3586212130973 48.9944486068347  
53.0284011078097 42.6022652963326 47.3791873993182 50.3519150282938  
49.5185112777773 46.7760357462635 51.1169368198437 52.4393177875001  
50.5511827666954  
LOC646992 41.4508241771315 43.9421822132391 42.0621425894624  
46.4555908533915 44.5668141895992 44.7804080899431 41.1507980856436  
44.9977782988116 42.8036731479932 42.4594149893798 44.0409178714232  
42.2577689927563  
LOC646997 40.3478825593224 36.2103905554984 39.4710743516517  
41.8778873678551 42.1650127805175 37.4782441311626 43.0930293831497  
37.86982638952 36.3649677956953 42.0621425894624 37.9946685306274  
37.8490162439785  
LOC646999 43.3638918705225 41.8073910693411 41.2365089689635  
39.2780515621926 40.4639532172338 41.4508241771315 41.8315602975157  
44.8997235283254 45.4799270968969 44.7958122466628 41.1638563416981  
44.5432192783161  
LOC647000 2640.06306087033 1559.50766982801 1296.28036613191  
1057.44729389649 3263.05269150231 1217.21440297138 3099.21690111993  
2083.69812106867 1839.09068171097 1234.59589464045 1030.31910195147  
1012.91803181784  
LOC647003 39.5676051939342 40.8880530359822 43.3085358214154  
43.6726153508978 43.6587492470348 44.6524308640784 36.7356360093603  
40.6171774724171 46.0106098064475 41.1222709786153 41.0808257270221  
43.6753843488695  
LOC647006 38.957687788868 35.9305494063137 42.640829914102  
43.8002456102021 40.7779767565889 38.6414316877471 39.5496902678788  
40.047314525032 38.7298222155532 39.6719190054379 37.4642807402741  
38.2350720635382  
LOC647008 33.5994525227062 40.5400384479766 36.178547300352  
40.1804147506786 41.3755760434934 34.9849896310235 42.1607322031054  
34.2814697823693 40.0403898620771 35.7202909649682 37.0180934800573  
39.6352613956998  
LOC647009 60.6441065119394 71.5249259772583 60.8357760968871  
53.9517841438975 76.301438841111 74.2690269784394 62.1970616836737  
58.3046521633424 71.787754116845 55.5206840401643 63.1566669782858  
73.9986015964321  
LOC647011 41.0608773166058 39.1982470626863 39.9101908547397  
38.4208429103799 38.4540849632254 32.9046688061235 37.1643693306382  
43.1567024035183 38.4344387289956 36.3612409063792 32.5482839399637  
36.3454320848591

LOC647015 38.0089018744739 38.9338521051669 44.9758339877851  
38.6414316877471 39.1650142708257 34.8956628705329 39.3585350448719  
40.831207953647 41.1742244762318 41.7405682794166 41.5421429082231  
42.9887069977696

LOC647022 37.0320432433314 33.0553208959996 39.2707964550441  
37.5382094267692 35.5220586859301 45.4882438975269 39.0458123429605  
39.3709357615493 40.0403898620771 41.1222709786153 36.9060997041453  
36.2582325396375

LOC647025 42.6036491382658 42.2577689927563 43.6670755115848  
39.3750969348308 43.4544762830742 44.3648993568405 43.6753843488695  
44.0390019242862 48.0163377492228 42.8936990772838 42.0750889188255  
42.8864415494484

LOC647028 45.4799270968969 37.7384958256497 36.5474283500601  
42.0102671859606 39.2608760193011 41.7627910693483 45.6042625176633  
42.4580504587581 44.7058233759912 52.6879797806876 39.5399188536544  
41.3481355128089

LOC647031 40.9558083259517 35.2143190355414 45.1569741609597  
36.6501141438378 39.3667161654772 42.5660695551615 36.4098694708483  
34.3865306339645 42.2577689927563 37.920964499903 36.9060997041453  
38.9496515344837

LOC647034 39.0620487644635 38.6414316877471 37.6557714476853  
39.3750969348308 38.4540849632254 38.1169703906207 37.3799542961839  
38.6454098044474 39.0775870687758 38.6454098044474 38.6662194645633  
42.2577689927563

LOC647035 39.9697332660833 38.0226905622357 36.5474283500601  
34.6468794865286 43.004943518025 36.2015763253919 40.7910160811527  
35.5798430594271 38.8271346375425 35.2880714952489 42.0750889188255  
36.064718696392

LOC647037 69.9431447778061 58.6249721386149 63.1450855271137  
50.2163892855092 52.8190882379316 65.564930068976 77.5813459454823  
110.869341159607 84.0899854321388 70.2565873027242 67.1477341610979  
89.0727613846343

LOC647038 44.7044140979108 42.1607322031054 42.0621425894624  
44.0451487108213 41.9842695818285 44.9896851005259 43.8206425661746  
46.8954576545929 41.9635525160083 43.0919221375514 42.6366765186182  
39.4490233720848

LOC647041 48.1481623841024 52.683711208052 46.02045129728  
49.1786207920603 48.1986674201502 48.0080291106034 46.3057385979341  
49.2019743609873 48.1578509702472 48.3077814647455 49.4878464533902  
51.4466290643537

LOC647042 45.8108990837624 43.4396866157171 41.3366779545815  
51.7739270955254 55.6991707857987 47.2927436772465 44.4639405506967  
40.931294690669 42.8036731479932 46.8954576545929 48.2050207071554  
47.0130468198828

LOC647044 41.9407041937973 50.4022543872993 43.9450023643394  
42.5664883002833 49.8304479381623 43.2805590023412 37.7136011474903  
39.4710743516517 58.9056300364078 37.7315666632629 44.6286581923295  
45.3763275588341

LOC647046 44.6231541342 44.3529919625344 41.0356368374708  
41.8778873678551 41.2740822675592 44.5544727111028 42.9803717121865  
40.831207953647 41.9635525160083 49.1928206164702 45.7328341667151  
33.5578650644246

LOC647049 36.4564050256915 44.0409178714232 38.2280071951674  
40.4359177791566 44.5668141895992 39.2248354955045 44.3440839686558

41.2551966132486 36.8127605061228 37.7315666632629 41.8168470823451  
40.5703581862752  
LOC647050 46.9939712192224 45.0115870036541 46.9040704638073  
50.0526763693329 46.3150221024046 44.8872784170036 46.4388841354122  
44.5029690493211 49.1940901905636 45.3530683538086 46.0905079010237  
47.6040671292013  
LOC647054 46.441301934328 51.3800036046133 58.637422084759  
50.5310598656998 58.037539503209 48.1591264215184 53.7423898357583  
47.5950227477807 58.5561424827901 48.1392888470269 52.3187919317561  
59.7999569757275  
LOC647058 35.8208542506595 35.1224289925572 32.1218888714537  
35.314469458379 38.4540849632254 36.4986986135769 37.1643693306382  
37.7612949798895 34.5633623842083 35.4990901121893 35.1470994647364  
35.7451401627836  
LOC647060 39.6609238036815 39.6123051184545 44.1452943804044  
42.6913548400127 42.6022652963326 40.040778349137 47.8947595316832  
45.9604707098953 36.7267557061938 39.6719190054379 45.6348103033479  
41.1554481567603  
LOC647065 47.7267190613906 38.7344853699576 43.9450023643394  
42.2496337895968 40.2449343247539 46.263826584899 37.2892641289258  
43.5544347011646 43.6670755115848 45.4614234442527 37.9946685306274  
45.8546719310325  
LOC647074 37.8386378737561 44.5152708955623 40.301483914446  
40.9607305725196 40.0599807618105 39.2985791324641 41.4742337714895  
37.33030683349 42.5406888281114 39.7835513496873 47.4630625313159  
42.6758568421347  
LOC647079 35.0202257459026 41.4508241771315 39.2707964550441  
36.9912468186322 38.5512429290626 37.9951997351435 39.6535880152834  
37.0390589468421 36.3649677956953 40.5090849993014 38.079222289614  
38.1421709520616  
LOC647080 44.3355304829989 40.8880530359822 41.785676764591  
44.4367387274922 46.9906120932727 44.55447271111028 40.4359177791566  
39.6474008369935 43.7630587657205 47.2299678280724 49.4593570700221  
44.3521099857368  
LOC647082 35.6111578834671 34.9262464079777 34.5718473203083  
36.1562979552173 37.2567512265363 34.3887641786747 33.1392460259336  
36.7460922671619 31.859589438824 34.6720534245631 42.0750889188255  
38.2350720635382  
LOC647083 40.6559419616644 51.524711857679 44.7829632472754  
51.3851157261451 48.1473938886239 46.1513019317765 42.2577689927563  
47.4740726032707 48.9931786790166 44.571915452417 48.1352470945488  
45.3763275588341  
LOC647089 43.4626049853157 36.1232327599945 37.5597671487621  
35.49696651597 35.2163900400329 43.3785777889265 40.0052661202207  
36.0306975524309 41.2870505273664 47.1001757441025 44.3763859390287  
35.9604262434141  
LOC647096 44.7915315085948 34.9262464079777 31.0126568324233  
35.6928955245309 35.7973685350741 33.895835691032 33.8558232866797  
37.86982638952 32.554751989205 35.2880714952489 30.3383368296776  
38.9496515344837  
LOC647102 43.844855336215 38.3322849790657 36.8730514568925  
51.7739270955254 37.4470183315826 42.157627240486 39.5496902678788  
40.3357777530419 40.3316153483289 37.920964499903 38.956280281655  
38.4330755397458

LOC647103 39.7576136507593 42.6022652963326 42.3536549114165  
44.7980740332174 43.7517118200398 42.0574848021044 49.2546642180676  
42.0494116081998 44.8003345643334 37.0320432433314 41.1638563416981  
41.5536168238478

LOC647104 59.5000730792772 58.0218262176065 54.4384603094793  
54.4586176399381 69.1862663389904 64.5187138759372 53.8687221233237  
57.3286965007828 52.3579564953125 53.3059058105836 53.8260140375214  
53.0446815750355

LOC647107 38.6454098044474 36.5219488315447 39.3709357615493  
38.6414316877471 37.4470183315826 33.4492509999281 38.0598374201407  
45.4757965005055 39.9444191873552 39.5637454855233 38.1835938174625  
38.5279745308203

LOC647108 47.0940613507321 45.1694246393676 49.2041300973417  
57.4595416719581 56.1186281675573 60.877229406755 50.3519150282938  
47.2009420656854 46.7760357462635 42.9866214102525 47.299647867533  
52.9609836781499

LOC647121 44.9896851005259 43.1805016690297 42.2577689927563  
48.4916117779992 41.8806343997257 43.0860383229288 43.5627649099623  
44.8997235283254 39.4762546236449 34.8137085420423 43.3085358214154  
47.1060577218993

LOC647122 45.4799270968969 38.6414316877471 45.3974838013476  
44.265834798964 42.1650127805175 44.7804080899431 46.7100796279384  
46.8954576545929 40.137818555383 43.4885245598939 45.6348103033479  
38.4330755397458

LOC647123 39.9697332660833 36.1232327599945 40.931294690669  
44.6905691366696 42.9090346219023 38.1169703906207 42.1607322031054  
47.8947595316832 38.9834959368496 36.9102644736882 41.1638563416981  
39.6352613956998

LOC647129 41.4508241771315 40.3384318592985 36.8730514568925  
42.5664883002833 46.7508829977587 44.7804080899431 39.2533668167483  
40.6171774724171 35.860430241131 40.8970401536578 47.7535797917441  
35.5523662009011

LOC647130 37.9387791625384 38.8336427948187 42.640829914102  
42.6913548400127 45.3675390992851 42.750861693377 43.6753843488695  
40.931294690669 43.1805016690297 47.2299678280724 43.7585538437696  
42.4607795638552

LOC647131 39.266565827316 42.0709558258414 39.4710743516517  
39.066284740632 40.3452320167286 38.6414316877471 35.0305278582179  
37.7612949798895 41.7627910693483 40.4136535208406 42.6366765186182  
45.1735152121056

LOC647134 39.1590964332473 55.0897019602305 44.2405728317107  
41.5464765641928 38.9496515344837 36.1190722948669 39.1539892144371  
40.1474543172332 38.7298222155532 35.7202909649682 39.0550139257658  
40.2669497398702

LOC647135 41.2773842727759 43.8343801618097 44.014441886238  
45.8204185866107 41.467005949568 45.9980734733005 43.1602899171656  
43.6817186055362 43.9204029310411 41.3641352453779 41.3312161825945  
41.7575097298927

LOC647147 42.1537476443423 38.0226905622357 37.2838080935695  
45.7397504535169 42.9090346219023 40.244271403831 41.5817737564592  
37.4484310268909 41.9635525160083 39.6719190054379 42.357910063876  
44.2527566343661

LOC647149 36.8072833828297 40.4359177791566 41.8751578329365  
41.8778873678551 44.147557390293 40.5281496800812 44.4639405506967

39.2672712041774 35.5220586859301 39.0648733099061 38.6662194645633  
43.2776458914333  
LOC647154 41.4508241771315 44.5884811528117 39.0775870687758  
48.4916117779992 40.148780650831 39.7394181011603 47.5963750520409  
42.9301944191913 49.5539622682049 42.785429206422 39.6403089864678  
43.6753843488695  
LOC647156 42.442231667357 42.8542642792862 38.9790184198145  
43.6726153508978 44.147557390293 40.244271403831 46.8613212048981  
40.2382908228517 40.6957787921451 33.8984830800739 41.9908237694988  
42.1537476443423  
LOC647163 39.266565827316 43.0227387991135 38.5045333213784  
42.0102671859606 39.7568367479301 40.9506062495231 43.3262148375525  
41.0381860307445 40.6957787921451 43.7303813515864 40.4504608195666  
40.7704587752083  
LOC647166 38.385865183581 41.0678614026819 39.4710743516517  
44.265834798964 37.956732373465 43.9724628401189 41.3594868055879  
40.931294690669 40.3316153483289 37.4302011516587 38.956280281655  
39.7411455670172  
LOC647169 44.2350046179299 44.4639405506967 78.5325880060762  
45.6706505553383 43.2907292669418 46.0364000143537 47.9665737016961  
50.2391482329046 113.7763650775 42.1317134987795 41.9908237694988  
43.6488638425729  
LOC647171 41.7397731376692 42.6939394537076 45.4865173433646  
45.8844325913247 39.9697332660833 46.1513019317765 45.1017494688414  
42.9301944191913 42.7150227340364 44.7958122466628 42.5426057453993  
48.5123041297835  
LOC647174 37.1485601150873 39.8695929627783 37.3687900733549  
40.1804147506786 35.7973685350741 43.1826328292558 42.8684958525042  
48.4670130605028 40.7847110517594 40.1179210534118 38.6662194645633  
36.6603338274678  
LOC647176 46.9939712192224 46.6314009405034 42.7303139017786  
44.9370339275041 46.5557478175976 46.4648868771662 52.2476631126873  
42.6450179841129 43.6670755115848 49.6203214143464 45.390192977585  
42.1537476443423  
LOC647181 41.2424637338424 40.9731067463382 35.5220586859301  
52.6947911480086 50.5110359971301 42.157627240486 45.1017494688414  
45.9604707098953 40.8970401536578 44.1379638573455 45.1432412071268  
48.4535991392809  
LOC647190 38.5648843914189 39.2907645923217 38.5045333213784  
37.8442841690502 39.9697332660833 39.3841861812262 39.4600924554505  
41.4508241771315 39.3750969348308 39.2623423164488 37.1059647239814  
41.9430737035925  
LOC647191 42.0532901689036 45.8669209716694 46.9040704638073  
43.4410741327254 44.147557390293 40.4359177791566 41.4742337714895  
50.857522488428 45.9227107476843 44.8997235283254 44.2142581488029  
43.2776458914333  
LOC647193 40.7609952437622 32.0823591288671 41.6977706798234  
41.5464765641928 38.4540849632254 39.132725377815 42.357910063876  
41.8417024632349 39.1790517315259 39.3698811593364 37.7384958256497  
41.5536168238478  
LOC647195 51.7607563002005 50.7487159427973 60.7530213660442  
51.5913529948887 50.8875036861067 55.1987351219665 60.9648845690177  
55.9303347977781 59.5093038629766 43.844855336215 45.2265319826548  
58.0218262176065

LOC647197 36.6480005877129 41.7337506166619 37.3687900733549  
39.066284740632 36.6354013629791 45.0882356578404 45.1017494688414  
42.4580504587581 40.4997186069494 41.1222709786153 42.6366765186182  
36.449101775775

LOC647199 41.0608773166058 37.10170285405 37.2838080935695  
48.856176220627 36.2048942610546 40.040778349137 42.9803717121865  
41.7419877611072 45.5779686360641 40.8970401536578 40.0766543123257  
42.57175366709

LOC647200 40.7609952437622 35.2143190355414 39.1799070031819  
48.1662933382789 39.6535880152834 37.2686490268265 44.0687697278114  
41.0381860307445 41.9635525160083 39.6719190054379 39.6403089864678  
41.0657892043496

LOC647206 37.7384958256497 36.6968906669565 36.769073068743  
40.1804147506786 40.7779767565889 40.1428591998404 35.1307934330047  
43.6434576713809 46.1101825640108 46.8954576545929 46.0905079010237  
43.4709415392696

LOC647208 37.9387791625384 39.6123051184545 40.931294690669  
43.1847628331565 44.0451487108213 35.5158505219112 42.8684958525042  
40.3357777530419 38.5252456306656 41.1222709786153 42.4580504587581  
34.5633623842083

LOC647210 46.441301934328 47.3536182445315 47.7737810047679  
51.0175677516029 52.2089306840125 45.9266745571724 44.4639405506967  
52.9813204449021 51.3511088648386 56.3441077510744 53.3078448066074  
46.7182294568603

LOC647212 46.0023068797812 36.3110701990588 41.785676764591  
39.5050383901884 32.8704945047196 40.7616966228404 38.1793598983615  
39.7509165247419 41.6616444147804 45.3530683538086 42.0750889188255  
38.6454098044474

LOC647213 41.4508241771315 40.0527893189096 42.640829914102  
40.7481155008596 43.2484996523549 43.8582747295766 39.6535880152834  
41.9315419791594 39.6609238036815 40.2112371512838 37.5583886316038  
38.4330755397458

LOC647215 52.310270746917 38.2263227947189 45.7968648044613  
39.853175885492 44.147557390293 41.8613406887824 35.2163900400329  
43.1567024035183 44.7058233759912 38.1042454705119 37.9230440150891  
39.0536056496869

LOC647219 34.8099089553046 35.4484652445078 46.0727230219512  
39.066284740632 46.6397391251762 40.7616966228404 40.3302268293707  
45.7476095696859 34.9428206949566 44.4652605017595 42.6366765186182  
35.1451084093692

LOC647225 45.5758521267508 40.716553247236 45.4865173433646  
51.0175677516029 50.5110359971301 47.3791873993182 45.4799270968969  
48.0582855095143 50.4974478884077 44.571915452417 41.9083581529276  
43.6753843488695

LOC647229 43.5710871617107 43.9421822132391 42.7303139017786  
36.7892997857376 40.6723334103791 37.7000400506818 41.4742337714895  
41.2551966132486 47.7086093893038 41.1222709786153 38.4689132737495  
40.4639532172338

LOC647234 39.8662795144616 37.4540772310118 44.4311655729487  
55.8709511400674 41.467005949568 44.2607789091176 36.9355798143571  
42.9301944191913 43.2761454096265 42.9866214102525 35.046946054314  
46.0633179231318

LOC647237 41.6354649482853 36.4002279956519 38.5045333213784  
43.3078542962968 41.8806343997257 40.8634043028528 37.4772922422734



43.0390857698452 43.7630587657205 39.0648733099061 39.153226699662  
37.2810767789306  
LOC647243 46.6348258763289 50.2696827764943 48.6037684272115  
52.1201052574162 45.5809132232681 49.2050538150106 44.3440839686558  
50.0526763693329 50.4974478884077 45.0155543555707 46.5650556481721  
43.7672102682067  
LOC647244 38.7537364570873 40.3384318592985 39.4710743516517  
38.9534635879195 38.5512429290626 38.5252456306656 43.5627649099623  
36.0306975524309 39.5806465938526 41.7405682794166 40.4504608195666  
34.2141875904985  
LOC647246 35.9305494063137 38.4330755397458 34.9849896310235  
38.0958223740111 34.9062568194127 36.6271061451613 38.6243997507646  
36.9355798143571 35.860430241131 39.2623423164488 35.1470994647364  
46.3411353377615  
LOC647247 36.7356360093603 38.1312950900467 30.7315474127249  
33.5578650644246 34.7018263647985 39.0266821712099 36.634024014558  
38.8495095797881 33.2715481910159 38.1042454705119 38.5668610487033  
33.4316681623175  
LOC647250 33.8558232866797 42.0709558258414 33.6816578730693  
31.4228928703009 35.7973685350741 42.2577689927563 30.0771630269067  
32.6039814489621 33.802253812079 39.0648733099061 40.6373400186325  
38.5279745308203  
LOC647251 50.8388984085636 47.765848710116 51.223859150798  
64.6945454069792 46.9906120932727 52.2089306840125 46.4388841354122  
45.0972184964705 46.0106098064475 40.3235655331796 43.4709415392696  
39.6352613956998  
LOC647254 42.5193208629123 39.3999056968598 40.4882741869718  
35.6027791404152 38.9496515344837 35.9305494063137 38.8417151851134  
43.1567024035183 36.0741672064298 39.7835513496873 37.8372168909583  
29.4159269895179  
LOC647257 48.3814421939888 41.6466169548846 44.5134109184888  
41.3027031037343 43.004943518025 47.7556758818053 44.6032218589199  
43.4544762830742 50.1603795873336 41.3321861371202 42.5426057453993  
43.4709415392696  
LOC647264 42.2618615571566 40.148780650831 39.9101908547397  
44.3440839686558 44.4489662507893 45.0283997415478 39.2533668167483  
42.6022652963326 42.2577689927563 39.6251842352088 43.0710577955487  
41.7575097298927  
LOC647269 40.5654775358427 42.7775752471711 47.4740726032707  
48.1662933382789 41.9842695818285 41.0582900711341 43.6753843488695  
47.2864663693787 43.9450023643394 41.5435611403119 38.6662194645633  
44.3521099857368  
LOC647274 42.3433931248155 45.2556760873335 42.2577689927563  
49.5424425850549 48.7288537840562 43.2805590023412 43.4544762830742  
49.7309743973184 44.2607789091176 41.8613406887824 45.310660704531  
48.8670821164567  
LOC647275 38.957687788868 39.5050383901884 38.6727842796202  
41.5464765641928 36.7356360093603 41.159706131351 43.6753843488695  
31.5766875248365 46.4164127487052 41.0057887014368 42.911855821602  
42.4607795638552  
LOC647279 38.0089018744739 40.6380495994768 36.178547300352  
43.9282059368202 38.745552403895 39.0266821712099 42.357910063876  
35.4526946152955 36.8127605061228 39.5637454855233 40.547835538778  
38.1421709520616

LOC647281 42.1537476443423 42.0709558258414 43.3085358214154  
39.5050383901884 51.0107745412152 42.9695585740813 40.3302268293707  
41.1575777497576 60.6706478075023 44.2580151149956 44.9713479185144  
41.6550823405646

LOC647283 45.2875173643252 35.8227939208521 35.9305494063137  
30.9241129241985 37.7576900881741 37.2686490268265 35.8227939208521  
37.9837233601316 37.4540772310118 32.6203270051744 39.0550139257658  
37.2810767789306

LOC647286 40.5235471987417 41.5132248356707 39.9519547348106  
40.7481155008596 40.5710637884029 37.9951997351435 38.7337086062875  
41.2551966132486 41.1742244762318 39.8455060654531 41.2267153672559  
39.5792604499113

LOC647295 45.1912496459517 47.4740726032707 43.8495248991589  
45.8844325913247 41.2740822675592 36.4986986135769 47.4439407315335  
44.0390019242862 44.619512785899 47.0055981216687 47.8988096575648  
46.5650556481721

LOC647297 49.1868644496737 41.9894412416874 42.157627240486  
43.9282059368202 41.467005949568 42.9695585740813 43.5627649099623  
42.4580504587581 43.1805016690297 47.611018474151 49.2206713037152  
43.8575940017119

LOC647306 44.6231541342 44.6918600441328 44.1452943804044  
46.1673159982664 45.1137938810047 43.1826328292558 46.7100796279384  
43.844855336215 45.9227107476843 41.1222709786153 41.2598458726002  
44.1452943804044

LOC647308 44.3355304829989 37.2810767789306 37.2838080935695  
40.646702696033 34.9062568194127 35.8227939208521 37.1643693306382  
36.2539950294089 37.5469247328848 38.6454098044474 34.8383995317036  
35.7451401627836

LOC647309 42.5534565507139 41.0226232127351 44.1452943804044  
43.4410741327254 45.3675390992851 43.4263583096036 44.0137388752186  
46.2779564481158 41.4636047919453 43.6033221838149 40.8681871019812  
43.0930293831497

LOC647310 47.1962846565261 40.9731067463382 46.5650556481721  
56.0794100106654 37.956732373465 46.3715909653832 42.0605906240248  
45.1714698794331 44.0519245668737 38.8507804383261 44.553780984244  
43.5738557773903

LOC647311 37.0320432433314 41.7337506166619 43.4709415392696  
35.0448343468967 40.8873907150245 45.1873487463472 35.8227939208521  
42.2577689927563 46.2027193115397 41.5435611403119 34.6366195121669  
38.0452862258803

LOC647315 43.3638918705225 39.8695929627783 43.0971787292711  
42.2496337895968 36.8059561571675 35.6125439901743 38.6243997507646  
36.43924066428 73.0403099404 38.4187686307607 35.2339574411711  
34.4570158133896

LOC647322 43.1805016690297 79.6516904169771 187.315844580254  
45.8844325913247 62.8270556619309 45.8325181856483 45.223075311113  
54.0507720792049 65.0217598379984 57.7805922926828 65.5386366902998  
48.5123041297835

LOC647323 35.5179217192467 48.0296332183129 41.528370959196  
45.1944222548351 48.5000946421718 40.8634043028528 43.6753843488695  
36.6452480995946 43.9450023643394 36.5806287103157 37.5583886316038  
45.1735152121056

LOC647326 43.0001432913058 46.1569135229922 53.1491634301682  
46.8954576545929 40.8873907150245 41.7627910693483 44.2166118829877

42.157627240486 42.2577689927563 41.0057887014368 38.956280281655  
38.0452862258803  
LOC647328 43.844855336215 43.683792219729 43.3085358214154  
45.4634652319753 48.9627346956003 44.5544727111028 50.2016912396771  
56.1404433602127 46.4861258030402 46.441301934328 49.9338905397767  
47.9566297250148  
LOC647331 44.7915315085948 41.7337506166619 44.5134109184888  
40.9607305725196 42.1650127805175 42.8598805316863 51.7714254834195  
41.6466169548846 41.7627910693483 41.9666541498638 43.6629145624937  
40.3691324547049  
LOC647333 34.4896350146096 36.6968906669565 37.5597671487621  
39.3750969348308 39.6535880152834 40.7616966228404 35.9894133432376  
45.2806199505029 44.7058233759912 40.2112371512838 37.1059647239814  
39.6352613956998  
LOC647335 43.844855336215 45.0905928998779 44.0451487108213  
43.6726153508978 44.147557390293 40.040778349137 38.4005795891396  
45.3872406432794 42.6366765186182 48.2596564318071 45.2265319826548  
45.1735152121056  
LOC647336 42.442231667357 44.8529259387308 38.6727842796202  
38.4208429103799 35.2163900400329 39.2985791324641 33.1392460259336  
35.1738399826814 43.2761454096265 37.3179578037963 35.7953070087288  
42.4607795638552  
LOC647337 35.1307934330047 32.6416008433981 26.6357008041456  
37.1894304543751 34.6227169056411 35.5158505219112 32.2133093774284  
36.7460922671619 29.2731027042641 30.9403229851671 33.6902293666089  
35.0222940937513  
LOC647339 46.0920218698606 39.7835513496873 41.437237454134  
45.8844325913247 49.32293280121 44.9896851005259 53.4921736109774  
50.1833483241864 43.1805016690297 45.0155543555707 41.6336636285875  
41.863927676552  
LOC647340 1749.06320703181 1835.21901524331 1673.60994518271  
1266.41536472956 2220.90215179682 1658.86829668934 1991.4199819544  
1311.88650141004 2435.70120719503 1050.05355467301 934.48498309932  
1652.85734308754  
LOC647343 38.8561375693335 38.7344853699576 41.1367478979484  
43.074472921841 37.3508690072156 43.0860383229288 38.6243997507646  
38.4540849632254 41.2870505273664 41.0057887014368 35.1470994647364  
45.0035308952466  
LOC647344 41.5421429082231 37.2810767789306 37.7384958256497  
41.7614975630362 35.0181575202066 45.4882438975269 41.0381860307445  
39.6474008369935 35.860430241131 40.8970401536578 36.131485826118  
42.0424641526302  
LOC647346 70.178974380507 133.823107212467 77.6174893940285  
68.6379135603075 85.201964489995 188.552900887757 115.761674855716  
65.4045346634146 109.738537924214 113.929486370331 124.903031106573  
128.521748930472  
LOC647347 35.1307934330047 32.742439449766 45.3974838013476  
41.0726336841311 41.6806984441849 41.0582900711341 38.7337086062875  
36.1375121409002 38.9006788676407 37.6383530120621 38.3684202018524  
37.8490162439785  
LOC647348 44.6231541342 44.7829632472754 47.4740726032707  
42.1273928203021 46.8674366115656 44.9896851005259 43.9450023643394  
44.5029690493211 49.9951674107458 46.8954576545929 44.2925355984056  
42.9887069977696

LOC647349 216.358862796367 249.37112382902 310.763904671301  
277.548019244696 173.357715186701 518.074074000609 187.767803297395  
170.327588764719 238.510952165358 136.062864107443 160.777879976503  
229.47693624489

LOC647353 44.5282181324797 45.9266745571724 43.0016969050339  
49.1786207920603 39.5595233162192 44.7804080899431 42.629412460409  
41.5464765641928 39.1790517315259 39.5637454855233 34.9428206949566  
39.8497227447888

LOC647357 44.3355304829989 45.5842286511645 44.4311655729487  
43.9282059368202 50.5110359971301 45.8325181856483 43.1931731665131  
41.7419877611072 44.7058233759912 42.6793753550854 48.2910530887214  
40.3316153483289

LOC647359 46.7293238583888 47.9128504683618 46.7508829977587  
54.6089451252049 45.6895223823001 44.1737502492846 49.8281348927244  
50.628152951493 46.581796165231 44.8997235283254 48.2050207071554  
44.3521099857368

LOC647360 31.8228237796461 41.0678614026819 36.8730514568925  
42.357910063876 38.0598374201407 38.3418933808844 44.9863726205428  
35.2642250366721 35.2143190355414 38.528621456378 40.4504608195666  
39.4490233720848

LOC647361 8050.256095383 8050.256095383 7980.71309230447  
9181.13240708506 7911.19531717602 7627.46814033012 4986.44888767011  
8827.37298329149 7562.42822724655 7562.42822724655 6356.05807792831  
10235.3288951482

LOC647363 53.3059058105836 44.4411734611229 47.7737810047679  
42.2496337895968 56.6951078698291 55.7197525213035 51.5967098638347  
50.1833483241864 51.1055541075029 42.3606390470387 48.5292718280498  
44.8372404608604

LOC647366 35.5682888557715 37.3634897565502 40.0998167098057  
41.7614975630362 39.9283177178222 40.4359177791566 44.2753808209563  
41.9820792173615 40.2739700860114 38.528621456378 40.723990462047  
43.2776458914333

LOC647370 41.4508241771315 42.6939394537076 31.1853651446075  
39.853175885492 36.9702228618069 41.3553369544097 44.6032218589199  
47.3791873993182 40.4220196471124 39.5637454855233 37.1059647239814  
43.4709415392696

LOC647371 40.6559419616644 39.0102066700839 37.8386378737561  
46.3203995372658 42.4864576619427 39.6251842352088 42.0605906240248  
41.7419877611072 43.3744503319109 41.3321861371202 44.7114813656401  
45.8546719310325

LOC647374 39.6609238036815 41.8848959280916 44.1452943804044  
44.0451487108213 37.7576900881741 40.4359177791566 45.7452456977857  
34.5886782974123 35.6139301508335 41.1222709786153 47.299647867533  
43.4709415392696

LOC647384 38.4330755397458 39.0578297166485 41.554942319225  
42.5193208629123 43.4885245598939 43.3269087731399 37.2316700720288  
37.1317006162938 41.863927676552 40.2493681589104 40.4094901248527  
38.2835812177457

LOC647389 306.115856873599 191.503068870249 225.201522281399  
323.957165066178 167.319747725488 171.770578381558 278.507764368929  
564.468049419762 160.203825526096 580.109585240053 556.728676214581  
415.15150032168

LOC647391 41.0608773166058 47.1332119496722 43.6670755115848  
41.1886975241176 51.4527545197672 38.4330755397458 47.7390230243778

42.0494116081998 43.5669306063196 41.5435611403119 45.6348103033479  
40.1700117452801  
LOC647400 44.3355304829989 40.7952353240579 46.1653991089885  
42.6913548400127 52.4370718282084 45.7300501624017 41.8315602975157  
42.157627240486 48.3954967265007 45.3530683538086 39.8184668132023  
43.5738557773903  
LOC647406 44.436995101921 42.6939394537076 41.8751578329365  
42.2496337895968 41.8806343997257 39.0266821712099 40.1235656101329  
44.293922970134 47.1744296124496 42.2614524730856 45.6348103033479  
42.8864415494484  
LOC647407 42.6036491382658 40.716553247236 43.6670755115848  
43.8002456102021 41.6806984441849 42.9695585740813 45.3597029614942  
47.3791873993182 43.2761454096265 45.1569741609597 42.2618615571566  
37.7526485343328  
LOC647413 40.3478825593224 36.0366673493555 37.1643693306382  
38.9534635879195 47.5647821785529 40.7616966228404 39.4600924554505  
41.7419877611072 35.3227485563945 40.5090849993014 37.6484782516569  
38.745552403895  
LOC647415 33.2552842693684 40.0527893189096 43.1931731665131  
41.4273122914951 62.3233491851723 38.7340969861754 39.1539892144371  
43.844855336215 37.1820543575123 37.3179578037963 39.5399188536544  
39.3575468494941  
LOC647417 43.2724556187214 43.8495248991589 45.6989664108554  
47.3574589211166 40.6723334103791 42.157627240486 42.2577689927563  
45.7476095696859 41.2870505273664 43.7303813515864 45.1432412071268  
42.7782216342806  
LOC647435 42.3433931248155 34.6306468196142 32.6121532029976  
51.223859150798 40.8873907150245 38.6414316877471 42.9803717121865  
41.5464765641928 38.9834959368496 44.1379638573455 41.1638563416981  
43.7672102682067  
LOC647436 54.691568065544 59.7098454699348 61.6878176260761  
49.1786207920603 50.2163892855092 87.4239220649478 54.4934782594218  
53.9465584609317 52.8502823653368 60.8730416435467 57.7786197537899  
86.6105153696374  
LOC647439 34.5886782974123 40.8880530359822 30.9159908723475  
40.4359177791566 35.9894133432376 46.1513019317765 42.2577689927563  
36.9355798143571 39.1790517315259 39.1621898366355 42.6366765186182  
42.357910063876  
LOC647444 42.2618615571566 40.716553247236 38.5045333213784  
39.9084621723809 37.8242236505241 36.6522278218553 37.7136011474903  
40.4669141685209 33.0000332803229 38.151911051187 37.3687900733549  
38.4829727716328  
LOC647447 38.4338935171164 38.8668526610189 39.9540454402093  
42.3952997644094 41.8412766736617 40.2836329413616 41.547374565442  
40.6171774724171 40.2630560420191 39.5637454855233 39.7568367479301  
43.0209114948189  
LOC647448 43.0001432913058 41.159706131351 37.4642807402741  
39.3750969348308 35.7973685350741 44.1737502492846 38.7337086062875  
37.9837233601316 33.1602385985469 34.3674468322242 37.3687900733549  
45.9693232070002  
LOC647450 160.883501367581 3854.42494497831 1269.36837611919  
6873.84878164654 55.3100442506299 90.99086730704 164.917385239962  
233.381378925304 90.2790229242453 46.441301934328 39.7342718293432  
53.4735821194294

LOC647451 46.0920218698606 44.1239711172417 44.2405728317107  
44.4367387274922 44.2607789091176 43.1826328292558 46.8613212048981  
48.7814131120945 45.9227107476843 43.4885245598939 43.401782064778  
46.1592873342534  
LOC647456 43.1805016690297 41.9894412416874 44.8872784170036  
52.5307002738469 36.9060997041453 45.1873487463472 46.4388841354122  
48.7814131120945 41.9635525160083 48.9826868640753 42.911855821602  
49.4786466722535  
LOC647460 46.7293238583888 58.7460488758053 43.1931731665131  
76.2591822114739 49.32293280121 40.244271403831 38.5066108855005  
44.0390019242862 43.7630587657205 38.528621456378 47.0940613507321  
41.3481355128089  
LOC647461 38.1169703906207 38.6414316877471 45.5883690965192  
37.1894304543751 35.6434124419782 40.650742261428 32.9962272670005  
37.5511560880902 40.8970401536578 40.8970401536578 39.5399188536544  
40.7704587752083  
LOC647466 43.5710871617107 36.6002100641539 38.5045333213784  
38.8495095797881 36.7356360093603 37.4782441311626 37.9430145836712  
39.3709357615493 38.3418933808844 39.1621898366355 37.9230440150891  
35.0222940937513  
LOC647468 36.0144420013819 36.4002279956519 43.3085358214154  
41.4273122914951 36.2048942610546 40.1428591998404 41.706879587091  
34.8949555140527 48.5792058061372 38.0078357808393 41.1638563416981  
40.5703581862752  
LOC647471 45.3872406432794 40.3384318592985 36.9795961564828  
40.4359177791566 36.08956004634 45.2852528185486 41.706879587091  
40.7311497914871 38.8271346375425 39.1621898366355 41.2598458726002  
36.3454320848591  
LOC647474 42.9104454767916 48.1829653238565 50.2203578628217  
46.8249967544573 51.5165373796787 56.4199442234707 57.8870110456492  
55.9303347977781 52.0942589368478 46.325232414659 46.5308571957384  
47.5025821041537  
LOC647479 38.5648843914189 40.7952353240579 40.301483914446  
42.4580504587581 38.6454098044474 37.8102105794655 40.6750540874299  
45.2806199505029 37.9273653326866 38.8507804383261 43.0016969050339  
39.8497227447888  
LOC647480 40.3478825593224 38.0226905622357 44.0451487108213  
40.0698728584484 36.8059561571675 42.0574848021044 42.629412460409  
37.33030683349 43.5669306063196 42.3606390470387 41.9083581529276  
42.6758568421347  
LOC647481 47.2862299990938 55.0897019602305 41.9666541498638  
61.5515639412892 53.3086645804786 47.3791873993182 43.0930293831497  
44.293922970134 43.9450023643394 39.0648733099061 40.723990462047  
43.5738557773903  
LOC647485 37.2474303302343 36.3110701990588 40.5734458834617  
44.0451487108213 42.0709558258414 36.9060997041453 42.8684958525042  
38.2782436497441 41.1742244762318 38.6454098044474 36.43924066428  
35.6427313468066  
LOC647488 42.6036491382658 43.7644428186265 45.6989664108554  
38.5252456306656 46.7508829977587 38.9378717994178 43.6753843488695  
38.5457716679071 44.2607789091176 48.6124127998952 42.4580504587581  
41.4508241771315  
LOC647493 39.0620487644635 41.7337506166619 41.785676764591  
42.4580504587581 39.5595233162192 36.1190722948669 40.9157352260901

44.9977782988116 41.1742244762318 41.9666541498638 39.9070785037411  
42.6758568421347  
LOC647499 41.4508241771315 43.2649781354792 47.2055133646385  
39.853175885492 38.6454098044474 43.3785777889265 44.7255207589606  
47.4740726032707 45.2897806651929 42.5664883002833 42.7275315121163  
42.9887069977696  
LOC647500 40.2543341073001 43.683792219729 43.0602678767669  
40.3691324547049 40.9950639693255 46.4329203134841 39.7162631015511  
36.2015763253919 42.0126083977597 42.8936990772838 40.3180310664156  
41.7575097298927  
LOC647509 40.6559419616644 38.1312950900467 36.0306975524309  
40.3180310664156 35.2163900400329 40.040778349137 32.4466419672036  
32.4466419672036 32.7294532998931 35.0082729554459 35.046946054314  
33.0217499673686  
LOC647513 44.0328992213727 40.3384318592985 41.0356368374708  
41.7614975630362 39.0564222526273 40.040778349137 41.1507980856436  
40.047314525032 37.4540772310118 36.8059561571675 41.8168470823451  
36.6603338274678  
LOC647519 43.0930293831497 37.10170285405 34.4716904283753  
37.4223289687135 34.806104801006 39.6251842352088 38.6243997507646  
34.9580369221164 41.074824727477 37.0320432433314 32.5482839399637  
35.5523662009011  
LOC647520 43.1805016690297 46.5650556481721 43.5710871617107  
46.614092935749 43.6587492470348 44.3648993568405 44.0687697278114  
45.0972184964705 47.5564423692142 51.7594352155304 48.3847843498476  
46.8129509799753  
LOC647521 43.1805016690297 44.0409178714232 36.3604951341921  
41.6564075217517 39.6535880152834 39.7394181011603 42.9803717121865  
41.2551966132486 46.3203995372658 44.1379638573455 51.2318935933116  
43.8575940017119  
LOC647527 39.1590964332473 32.0823591288671 40.931294690669  
39.853175885492 32.6463318577756 37.9003288112261 36.197424053556  
35.0510338774593 41.1742244762318 42.5664883002833 44.7926323492519  
37.6557714476853  
LOC647529 44.8914371498528 43.2649781354792 40.4882741869718  
35.6027791404152 44.147557390293 40.7616966228404 40.1235656101329  
36.3405039629059 38.3418933808844 35.93950183586 43.3085358214154  
38.1421709520616  
LOC647531 44.1294459089314 36.6968906669565 39.4710743516517  
38.8495095797881 43.5544347011646 36.2015763253919 40.1235656101329  
35.3608605269276 38.1169703906207 42.2614524730856 39.6403089864678  
38.745552403895  
LOC647533 43.0001432913058 35.6434124419782 38.1421709520616  
43.4410741327254 39.2608760193011 35.6125439901743 42.357910063876  
38.079222289614 38.9834959368496 43.844855336215 43.0016969050339  
40.9683275553869  
LOC647534 42.5193208629123 40.2493681589104 39.991353369336  
36.6501141438378 39.859345745831 43.8582747295766 47.5963750520409  
39.4710743516517 44.8997235283254 44.2580151149956 41.2598458726002  
44.4475838947656  
LOC647535 40.9558083259517 48.6447083765118 43.0971787292711  
46.0228732507872 46.5557478175976 44.1737502492846 45.6042625176633  
49.7309743973184 46.9739160257217 48.6124127998952 45.0589947942306  
47.3172462673426

LOC647536 39.7576136507593 37.5469247328848 39.2707964550441  
43.6726153508978 42.3685136297603 46.574682061365 42.1607322031054  
43.844855336215 40.2274522635576 38.745552403895 41.4508241771315  
40.5703581862752

LOC647537 38.304249186058 38.4330755397458 39.2707964550441  
39.5050383901884 38.1644569189523 42.2577689927563 36.08956004634  
44.293922970134 41.4636047919453 46.2286164776607 41.5421429082231  
40.5703581862752

LOC647540 42.3433931248155 37.1685072112618 39.9101908547397  
42.8235313007746 41.3755760434934 36.6271061451613 40.5585676679482  
39.1652965788406 37.0126425326534 40.6022003765153 40.0766543123257  
38.8495095797881

LOC647541 44.3355304829989 44.2630383225933 52.3432130135266  
50.2163892855092 44.5668141895992 42.750861693377 48.6395795163502  
44.7044140979108 47.1744296124496 47.7180816682562 43.844855336215  
49.1200355938198

LOC647542 42.6036491382658 44.7829632472754 39.5450079747895  
42.357910063876 44.0451487108213 42.157627240486 46.4388841354122  
43.3262148375525 48.3954967265007 44.1379638573455 42.0750889188255  
45.4799270968969

LOC647543 40.2543341073001 44.8529259387308 47.9035532886869  
52.3004056941891 54.802736966312 58.5530199658661 41.0381860307445  
41.5464765641928 45.5779686360641 51.3351387089044 52.104880481326  
56.9379721393904

LOC647544 37.55264801907 39.2907645923217 50.3950981988762  
37.0732977341185 42.6022652963326 43.1826328292558 43.5627649099623  
39.9576138799997 41.5635499110307 44.8997235283254 43.6629145624937  
37.9607839934735

LOC647546 41.5421429082231 41.6466169548846 49.3000844711116  
47.6687908290818 44.147557390293 43.3785777889265 40.0052661202207  
37.9837233601316 40.7847110517594 41.1222709786153 40.4504608195666  
43.6753843488695

LOC647551 42.0532901689036 41.7337506166619 37.9482157381008  
37.9875302985336 38.8456942580061 41.159706131351 40.6750540874299  
41.0381860307445 44.8003345643334 44.571915452417 38.5668610487033  
38.5279745308203

LOC647558 42.0532901689036 42.3550738181144 45.5883690965192  
46.7577982595088 44.0451487108213 43.6670755115848 49.3854238365325  
44.1311654985682 46.2027193115397 40.5090849993014 44.0409178714232  
42.8864415494484

LOC647566 42.9104454767916 40.6380495994768 41.8751578329365  
39.1706564265495 40.8873907150245 46.263826584899 46.5650556481721  
45.3872406432794 37.3600014814388 41.1222709786153 45.0589947942306  
37.9607839934735

LOC647568 46.8954576545929 43.9421822132391 37.3687900733549  
40.7481155008596 35.3327761997046 39.4953494583071 36.9355798143571  
43.7396619462033 43.6670755115848 40.5090849993014 43.0971787292711  
42.7782216342806

LOC647570 40.0557788909923 46.8236022402545 47.0940613507321  
42.357910063876 49.5666074434383 44.9896851005259 44.8643898647322  
49.7309743973184 51.5229124652769 49.0841460667818 47.2134341420411  
45.4799270968969

LOC647571 44.0328992213727 43.5873188565519 43.5710871617107  
48.9944486068347 47.8075998240396 40.4359177791566 47.1345949868029



43.4544762830742 43.5669306063196 41.8613406887824 41.8168470823451  
44.0451487108213  
LOC647579 47.0940613507321 43.3458769998118 54.9944485073259  
40.646702696033 46.9906120932727 43.1826328292558 39.3585350448719  
42.4580504587581 45.0997987980157 36.8059561571675 43.844855336215  
39.1553169409075  
LOC647582 44.436995101921 44.1239711172417 40.931294690669  
52.5307002738469 41.8806343997257 38.5252456306656 37.4772922422734  
38.1835938174625 40.2274522635576 37.2089297656361 38.3684202018524  
42.57175366709  
LOC647584 38.7537364570873 41.8848959280916 33.553634633839  
30.5239050647746 34.5301949364147 41.6590564937735 40.9157352260901  
43.6434576713809 37.5469247328848 37.4302011516587 46.4753015651202  
40.0557788909923  
LOC647585 44.5282181324797 40.9731067463382 44.7829632472754  
40.5484717678957 42.0709558258414 40.4359177791566 42.629412460409  
41.9315419791594 39.4762546236449 43.0919221375514 37.9230440150891  
40.1700117452801  
LOC647589 41.9407041937973 35.9305494063137 38.6005272730664  
43.3078542962968 40.4639532172338 44.6524308640784 43.6753843488695  
44.797320243931 49.0986627051784 47.2299678280724 46.5650556481721  
41.6550823405646  
LOC647591 38.957687788868 40.2493681589104 36.5474283500601  
41.0726336841311 38.4540849632254 33.6859433472087 42.8684958525042  
39.6474008369935 37.4540772310118 36.5806287103157 39.3667161654772  
42.357910063876  
LOC647592 38.7537364570873 42.8542642792862 40.4882741869718  
46.4555908533915 42.1650127805175 44.7804080899431 35.7055410599146  
39.1652965788406 42.357910063876 42.785429206422 42.170702295259  
39.6352613956998  
LOC647596 45.4799270968969 47.8400694856726 46.8267540220952  
37.8442841690502 41.5668884168669 43.0860383229288 61.3620062177524  
44.9977782988116 49.9162522057712 43.844855336215 50.0303076717704  
50.3118072462443  
LOC647606 45.8108990837624 39.6995529770239 36.5474283500601  
35.3829784221072 36.2048942610546 37.3799542961839 34.6720534245631  
42.5435283762933 35.9645119596869 41.5435611403119 48.8088340735921  
51.138877923954  
LOC647621 40.5654775358427 36.89524015739 43.0016969050339  
45.4634652319753 44.4489662507893 41.7627910693483 40.0052661202207  
40.2382908228517 41.9635525160083 44.571915452417 36.0481934423077  
39.9519547348106  
LOC647624 39.9697332660833 38.8336427948187 47.3861758958576  
45.7397504535169 45.1137938810047 41.554942319225 45.223075311113  
48.0582855095143 42.1594905198929 45.5776159432079 45.4799270968969  
42.0424641526302  
LOC647625 41.8409927585705 37.8217989841918 42.640829914102  
39.7411455670172 39.1650142708257 40.1428591998404 48.0283573444179  
38.3684202018524 33.802253812079 37.2089297656361 37.1059647239814  
42.7782216342806  
LOC647630 45.1912496459517 42.6022652963326 48.1331309338997  
47.9915414951747 41.5668884168669 44.1737502492846 42.8684958525042  
43.2551508830106 46.7760357462635 46.7646877499666 37.9946685306274  
45.2783024981315

LOC647634 41.6354649482853 40.0527893189096 45.310660704531  
45.8844325913247 43.9450023643394 46.8954576545929 45.1017494688414  
43.0390857698452 50.2223403889892 42.5664883002833 43.1931731665131  
47.2131144508464

LOC647645 40.148780650831 44.5152708955623 44.696023817801  
53.0284011078097 41.8806343997257 43.6670755115848 40.2154497375715  
40.6171774724171 45.5779686360641 44.7958122466628 42.8263096141654  
40.7704587752083

LOC647646 44.1294459089314 42.2577689927563 44.5134109184888  
40.5484717678957 44.8897737954573 43.0860383229288 54.1707158323527  
50.1833483241864 49.3780606970538 51.7594352155304 43.9450023643394  
42.8864415494484

LOC647647 46.3390850717989 44.4411734611229 45.7968648044613  
39.6292788039793 43.5544347011646 43.9724628401189 44.7255207589606  
42.7431359850339 49.4786466722535 43.1839109702714 41.0050831223107  
37.0953622406687

LOC647648 38.5648843914189 34.15544299189 34.5718473203083  
39.5050383901884 38.1644569189523 35.5158505219112 40.0052661202207  
39.4710743516517 41.4636047919453 38.8507804383261 40.547835538778  
42.57175366709

LOC647649 43.4626049853157 44.2630383225933 42.640829914102  
42.2496337895968 49.32293280121 44.6524308640784 48.4859552186772  
45.0972184964705 49.3780606970538 46.1390887492649 46.5650556481721  
47.5025821041537

LOC647650 39.5676051939342 43.3458769998118 53.7792717770978  
210.059998353905 45.5809132232681 52.0299937917925 65.8986841086198  
50.3972033014227 40.4997186069494 41.9666541498638 47.3791873993182  
41.4508241771315

LOC647651 46.8141313516997 45.5842286511645 48.3847843498476  
42.2496337895968 48.0234896130991 49.5424425850549 46.7100796279384  
47.3791873993182 47.798305839406 45.9004543328976 52.2229654768933  
43.7672102682067

LOC647654 40.0557788909923 38.2263227947189 43.0016969050339  
42.5664883002833 37.7576900881741 36.8059561571675 38.2933870238743  
46.9986083378817 41.7627910693483 38.4187686307607 44.0409178714232  
43.2776458914333

LOC647655 40.2543341073001 39.6123051184545 36.0306975524309  
45.334106390212 39.6535880152834 36.0306975524309 39.1539892144371  
37.4484310268909 37.5469247328848 40.4136535208406 38.2795150354677  
37.0953622406687

LOC647656 42.6036491382658 36.1232327599945 36.769073068743  
51.7739270955254 39.7568367479301 41.159706131351 47.8947595316832  
41.0381860307445 38.6322728994674 38.528621456378 42.7275315121163  
42.0424641526302

LOC647661 40.6559419616644 38.3322849790657 40.4070046183108  
34.4382958501338 38.745552403895 39.0266821712099 41.8315602975157  
36.0306975524309 39.9444191873552 37.920964499903 39.5399188536544  
39.4490233720848

LOC647666 39.5676051939342 38.5252456306656 37.5597671487621  
40.9607305725196 35.9894133432376 35.2067831864574 35.3362091871364  
33.4534810696886 33.6902293666089 35.3849221682845 35.2339574411711  
41.9430737035925

LOC647673 165.42634596698 110.487281983469 126.017900743748  
216.744244428166 108.251353392321 195.512986297442 90.8691042645133

100.696072546592 106.97432416825 112.281286038716 124.986782737446  
236.661422875826  
LOC647677 39.3709357615493 41.8848959280916 37.6557714476853  
38.3166554965434 34.0927410219282 33.4492509999281 35.2163900400329  
39.2672712041774 40.3316153483289 33.7883338848419 34.6366195121669  
35.9604262434141  
LOC647680 47.3791873993182 43.4396866157171 44.5134109184888  
45.334106390212 44.0451487108213 48.7781962164988 48.0283573444179  
45.0972184964705 45.9227107476843 46.325232414659 41.4508241771315  
41.0657892043496  
LOC647681 44.9896851005259 44.2630383225933 42.4580504587581  
41.4273122914951 44.5668141895992 44.2607789091176 39.4600924554505  
42.4580504587581 47.9035532886869 44.6918600441328 42.357910063876  
39.0536056496869  
LOC647683 34.8099089553046 34.3715326040967 32.6121532029976  
37.8442841690502 34.806104801006 39.3841861812262 38.8417151851134  
38.2782436497441 39.5806465938526 40.5090849993014 30.9159908723475  
41.6550823405646  
LOC647691 50.7390160399184 53.2046867327331 58.5212649095879  
55.4180794172794 58.2780916793348 52.4351670989268 54.9765783642973  
66.5234828659154 47.9035532886869 50.4234835272833 60.2165699959135  
51.4968903591058  
LOC647704 46.5549623118323 46.2286164776607 41.6079958749402  
45.7397504535169 38.2496050953547 44.7804080899431 46.9929836306816  
43.2551508830106 43.6670755115848 50.4234835272833 43.1931731665131  
46.4499258373233  
LOC647706 39.266565827316 40.5400384479766 40.301483914446  
41.4273122914951 42.4864576619427 39.8455060654531 43.4544762830742  
43.3262148375525 41.4636047919453 38.2069499294002 40.4504608195666  
43.0930293831497  
LOC647707 39.9697332660833 39.5050383901884 48.2883694323339  
37.29566077996 34.0045980663271 38.3418933808844 37.4772922422734  
34.5886782974123 38.9834959368496 40.7063426028871 36.0481934423077  
37.8490162439785  
LOC647710 46.5549623118323 42.6939394537076 48.0191002461099  
43.5627649099623 46.8674366115656 48.5835484742456 46.0228732507872  
43.3262148375525 42.1594905198929 40.6022003765153 45.310660704531  
45.0035308952466  
LOC647711 42.0532901689036 44.3529919625344 39.9101908547397  
41.6564075217517 43.004943518025 42.5660695551615 42.357910063876  
39.6474008369935 40.7847110517594 44.6918600441328 36.8282383070068  
39.5418280570561  
LOC647713 42.0532901689036 44.2105195734073 55.3812135024656  
40.1804147506786 44.4489662507893 55.1037284831588 45.223075311113  
41.4508241771315 45.7452456977857 41.8613406887824 44.553780984244  
40.0557788909923  
LOC647716 39.1590964332473 39.0102066700839 43.3085358214154  
39.2780515621926 33.3231576795423 38.7340969861754 41.5817737564592  
43.2551508830106 39.7537274655115 42.1622837416589 42.4580504587581  
42.57175366709  
LOC647718 43.6706764143908 40.8880530359822 46.3150221024046  
42.4061338151892 41.7929491793697 41.6178506967511 42.8036731479932  
47.1345949868029 36.5393857306744 43.0919221375514 41.0050831223107  
41.4508241771315

LOC647719 42.0532901689036 41.159706131351 40.4070046183108  
42.4580504587581 52.2089306840125 40.4359177791566 38.0598374201407  
38.4540849632254 41.3803269429468 43.2988017098387 44.4688999098904  
39.7411455670172

LOC647723 43.6706764143908 36.4002279956519 38.0452862258803  
39.7411455670172 41.2740822675592 44.3648993568405 42.0605906240248  
40.6171774724171 38.9006788676407 38.2069499294002 43.6629145624937  
41.863927676552

LOC647726 41.9407041937973 41.0678614026819 48.8100349749783  
46.1673159982664 50.8875036861067 42.0574848021044 46.9929836306816  
44.797320243931 46.9739160257217 43.6033221838149 44.3763859390287  
47.7962548556026

LOC647741 43.5710871617107 44.0409178714232 39.2707964550441  
47.9915414951747 43.6587492470348 40.5281496800812 34.6720534245631  
42.5435283762933 40.4220196471124 44.4652605017595 46.824299585607  
43.1805016690297

LOC647742 41.6354649482853 43.8495248991589 45.3974838013476  
42.2496337895968 46.1804647841331 45.1873487463472 41.0381860307445  
45.8669209716694 40.6957787921451 45.1569741609597 44.7114813656401  
41.0657892043496

LOC647747 37.0320432433314 43.8495248991589 44.6032218589199  
41.0726336841311 44.9936360641969 48.260931742163 40.0052661202207  
48.3590401011623 44.4395580493118 39.8873706855774 38.1835938174625  
38.3291713594599

LOC647748 42.0532901689036 45.4882438975269 39.8299340037009  
40.7481155008596 47.5647821785529 39.4953494583071 40.1235656101329  
40.4359177791566 42.7150227340364 38.528621456378 41.2598458726002  
43.7672102682067

LOC647753 43.3638918705225 45.9266745571724 44.4311655729487  
37.9875302985336 41.1868052124344 48.260931742163 45.7452456977857  
40.4359177791566 43.6670755115848 41.8613406887824 43.9450023643394  
41.5536168238478

LOC647760 38.1169703906207 43.683792219729 45.2313723727673  
48.1662933382789 41.8806343997257 43.8582747295766 42.1607322031054  
38.6454098044474 39.9444191873552 35.3849221682845 44.7926323492519  
45.7562276914441

LOC647766 40.2543341073001 46.3635803515159 41.2365089689635  
33.4240466670776 35.4484652445078 46.4648868771662 41.1507980856436  
40.931294690669 40.5912213523345 36.8059561571675 37.9230440150891  
42.57175366709

LOC647778 47.9175508887533 44.6918600441328 45.989212296035  
46.1673159982664 46.6397391251762 48.0350549043063 47.5963750520409  
46.695848687694 45.3756389170606 48.8623729374733 42.0750889188255  
48.7814131120945

LOC647783 43.5710871617107 42.9358255168086 38.1421709520616  
43.9282059368202 42.269054475455 40.7616966228404 38.8417151851134  
43.6434576713809 42.0621425894624 48.9826868640753 42.2618615571566  
43.5738557773903

LOC647784 38.0089018744739 39.3999056968598 60.5678281953819  
39.1335009052403 42.1386542162789 42.1046072075724 43.8835874380262  
47.8947595316832 83.0534943004588 39.6251842352088 43.7585538437696  
49.4786466722535

LOC647785 37.3463875295726 37.1685072112618 39.4710743516517  
42.2496337895968 52.2089306840125 45.7300501624017 39.0458123429605

44.8997235283254 40.9901805728485 37.3179578037963 46.0095710163378  
38.6454098044474  
LOC647786 40.8681871019812 42.9358255168086 42.3536549114165  
40.1804147506786 40.148780650831 44.6524308640784 42.0605906240248  
42.0494116081998 43.3744503319109 43.7303813515864 40.8225507267584  
35.0222940937513  
LOC647788 46.0920218698606 42.1607322031054 40.931294690669  
45.8844325913247 38.2496050953547 42.750861693377 47.7390230243778  
37.2237132058632 44.1519466943185 39.0648733099061 39.5399188536544  
42.9887069977696  
LOC647797 42.442231667357 42.6939394537076 48.2883694323339  
39.2780515621926 40.5710637884029 41.9543948167375 47.4439407315335  
38.079222289614 45.8325181856483 41.5435611403119 40.6373400186325  
38.4330755397458  
LOC647802 46.1673159982664 39.8695929627783 43.401782064778  
45.0798408927912 38.745552403895 45.4882438975269 45.3597029614942  
44.0390019242862 45.1899271235974 43.6033221838149 47.5439485437351  
44.7401523707775  
LOC647805 40.4639532172338 43.0227387991135 44.8872784170036  
40.4359177791566 44.6834648302383 42.157627240486 48.0283573444179  
41.2551966132486 41.2870505273664 39.7835513496873 40.3452320167286  
44.3521099857368  
LOC647806 41.6354649482853 39.0894172982439 41.785676764591  
43.3078542962968 43.2484996523549 42.6575535390785 38.6243997507646  
44.7044140979108 43.6670755115848 41.1222709786153 42.7275315121163  
38.6454098044474  
LOC647810 48.0201377454632 36.1232327599945 44.4311655729487  
39.1706564265495 35.9058393060637 42.157627240486 46.9929836306816  
38.745552403895 37.10170285405 40.7063426028871 45.310660704531  
39.2469742642337  
LOC647816 36.5393857306744 43.0971787292711 40.931294690669  
41.4273122914951 41.9842695818285 40.244271403831 46.4388841354122  
43.6434576713809 43.8482802038826 45.4614234442527 41.4508241771315  
41.6550823405646  
LOC647819 35.8208542506595 38.7344853699576 34.0382693188794  
36.9912468186322 39.9697332660833 39.132725377815 33.3231576795423  
39.2672712041774 34.3842972343227 33.8984830800739 34.4716904283753  
37.8490162439785  
LOC647827 41.5421429082231 46.2286164776607 43.0971787292711  
52.8502823653368 45.5809132232681 48.5835484742456 42.357910063876  
46.1673159982664 46.581796165231 44.1379638573455 46.0905079010237  
47.1060577218993  
LOC647832 38.6454098044474 40.0266778690352 40.5734458834617  
35.249124243346 41.4397539024976 41.159706131351 44.9863726205428  
44.9631458622215 40.137818555383 41.1638563416981 42.1537476443423  
40.2669497398702  
LOC647834 70.9419509323007 54.2445399731644 62.0967404944031  
71.0211264570699 55.6991707857987 58.6439719071099 75.4053820110486  
76.4637616585578 68.0796261751272 73.8313212063649 74.9541456286637  
68.5174271063894  
LOC647836 39.0620487644635 37.1685072112618 40.931294690669  
38.6414316877471 39.5595233162192 39.6251842352088 34.0777108441756  
46.5717043290731 37.0126425326534 42.2614524730856 37.7384958256497  
39.0536056496869

LOC647839 42.9104454767916 39.0894172982439 38.4043916290561  
41.4273122914951 48.0234896130991 38.7340969861754 38.941855825269  
43.3262148375525 41.6616444147804 42.1622837416589 40.9157352260901  
36.6603338274678  
LOC647841 40.4639532172338 39.0894172982439 30.1388203764747  
39.9697332660833 37.956732373465 41.554942319225 39.0458123429605  
33.8558232866797 38.7298222155532 35.8304004211528 35.860430241131  
34.806104801006  
LOC647843 40.6559419616644 39.6123051184545 39.2707964550441  
32.9879066304034 39.0564222526273 43.8582747295766 40.1235656101329  
41.8417024632349 39.0775870687758 45.0155543555707 40.4504608195666  
38.5279745308203  
LOC647844 43.0001432913058 40.2493681589104 37.4642807402741  
44.1483976313959 41.467005949568 39.3841861812262 43.6753843488695  
43.7396619462033 39.9444191873552 40.4136535208406 40.0766543123257  
39.5418280570561  
LOC647849 36.1232327599945 36.1232327599945 37.5597671487621  
39.9697332660833 44.147557390293 35.4142595025086 40.5585676679482  
34.8949555140527 38.5252456306656 40.3235655331796 36.8282383070068  
39.3575468494941  
LOC647850 41.0608773166058 43.5873188565519 40.931294690669  
46.3203995372658 39.7568367479301 47.8636003588181 52.7002314230604  
45.4757965005055 43.5669306063196 41.8613406887824 46.5650556481721  
42.2577689927563  
LOC647854 46.0920218698606 40.7952353240579 46.6588655218735  
44.1483976313959 43.7517118200398 43.7630587657205 38.6243997507646  
43.1567024035183 40.5912213523345 45.3530683538086 41.7272875295469  
48.0350549043063  
LOC647855 46.3390850717989 47.1332119496722 42.9104454767916  
43.5627649099623 46.4343327861696 42.2577689927563 43.1931731665131  
41.9315419791594 43.2761454096265 44.7958122466628 40.723990462047  
40.6614700944853  
LOC647856 955.088515235485 1630.25992078321 1776.78784112613  
1384.80615431656 3776.54943917367 2215.01815680371 1416.47763911039  
1254.34397143795 2164.51925341969 2448.64580552439 2108.03351084959  
1945.33618761041  
LOC647859 76.2368668439875 87.5666652975503 66.288032400574  
46.1673159982664 71.8706847571669 45.7700386532539 74.2690269784394  
56.0183341691645 98.9113424606303 58.5087296620514 60.9710783023013  
71.6890300780549  
LOC647862 42.7150227340364 39.0102066700839 51.4308501933893  
45.1944222548351 37.7576900881741 47.6803619768589 44.2166118829877  
44.5029690493211 43.4656637536244 35.93950183586 44.4688999098904  
41.2437378488025  
LOC647865 40.6559419616644 31.8637059340657 39.6451483836089  
35.6928955245309 36.6354013629791 38.2293008890613 39.1539892144371  
39.5466975353131 42.6366765186182 42.2614524730856 37.4642807402741  
33.1559412791294  
LOC647868 36.4564050256915 43.0227387991135 41.1367478979484  
41.0726336841311 40.2449343247539 43.0860383229288 41.0381860307445  
35.7973685350741 44.3440839686558 39.7835513496873 38.8507804383261  
44.4475838947656  
LOC647869 40.3478825593224 38.5252456306656 39.0775870687758  
38.745552403895 35.2163900400329 41.4508241771315 33.6696565339534

41.2551966132486 41.4636047919453 44.571915452417 34.3633615460307  
35.8429598823818  
LOC647873 41.0608773166058 40.3384318592985 44.5134109184888  
44.265834798964 39.9697332660833 42.750861693377 44.7255207589606  
44.293922970134 42.6366765186182 43.9450023643394 39.9899430628542  
41.0657892043496  
LOC647876 43.6706764143908 42.4493032770053 40.5734458834617  
39.7411455670172 46.3150221024046 42.357910063876 41.4742337714895  
42.7431359850339 44.8003345643334 41.8613406887824 42.170702295259  
40.5703581862752  
LOC647881 38.7229679986571 42.6939394537076 37.1188989884324  
39.853175885492 37.1565984182084 38.5252456306656 37.6036146841933  
42.157627240486 40.8970401536578 39.528971131769 35.860430241131  
43.7672102682067  
LOC647888 40.2543341073001 41.8848959280916 41.6977706798234  
49.3654837541353 47.2074332636566 38.6414316877471 44.0687697278114  
46.1673159982664 40.3316153483289 46.5650556481721 43.6629145624937  
38.2350720635382  
LOC647890 44.6231541342 49.2050538150106 48.0191002461099  
42.6913548400127 49.8304479381623 48.1591264215184 41.706879587091  
45.9604707098953 48.3119523820103 46.2286164776607 50.0808824383821  
49.3984571719129  
LOC647891 48.6621527194963 47.2055133646385 47.0055981216687  
41.3027031037343 46.9906120932727 41.159706131351 44.6032218589199  
42.2577689927563 40.2274522635576 55.5206840401643 42.7275315121163  
45.4799270968969  
LOC647894 35.9305494063137 40.148780650831 38.6727842796202  
40.0698728584484 36.8059561571675 39.0266821712099 46.0228732507872  
41.4508241771315 36.8127605061228 39.3698811593364 41.1638563416981  
40.0557788909923  
LOC647904 35.7012997405508 37.10170285405 35.2101597814352  
43.074472921841 35.6434124419782 46.1513019317765 38.0598374201407  
41.3506832276112 41.6616444147804 37.5343260962758 38.956280281655  
38.6454098044474  
LOC647908 41.8409927585705 39.7835513496873 35.2101597814352  
37.651298468202 39.859345745831 42.357910063876 40.7910160811527  
44.4031868028216 42.0621425894624 42.2614524730856 41.5421429082231  
41.2437378488025  
LOC647910 44.0328992213727 41.2598458726002 44.696023817801  
41.5464765641928 45.6895223823001 42.4580504587581 48.6395795163502  
43.5544347011646 38.6322728994674 45.1569741609597 43.0971787292711  
41.6550823405646  
LOC647911 31.4517139158876 44.7829632472754 37.7384958256497  
46.7577982595088 42.7107928951766 37.1317006162938 43.4544762830742  
41.1575777497576 39.853866204927 37.7315666632629 38.745552403895  
37.7526485343328  
LOC647919 47.9175508887533 48.8584917918986 42.4580504587581  
43.4410741327254 40.8873907150245 44.0804700754786 52.8496345990125  
43.5544347011646 44.8003345643334 40.5090849993014 43.0016969050339  
46.1592873342534  
LOC647920 47.2862299990938 44.5884811528117 42.4580504587581  
42.2496337895968 41.0885562160946 42.750861693377 42.629412460409  
48.1591264215184 42.1594905198929 37.8217989841918 46.0095710163378  
42.2577689927563

LOC647928 43.6706764143908 44.2105195734073 52.5353664902258  
46.0228732507872 45.3675390992851 40.5281496800812 44.9863726205428  
44.293922970134 44.2607789091176 40.2112371512838 43.401782064778  
38.9496515344837

LOC647935 43.4626049853157 42.9358255168086 38.3166554965434  
49.5424425850549 48.8381507187986 43.3785777889265 45.4799270968969  
42.0494116081998 41.5635499110307 42.3606390470387 46.2560238004757  
43.3744503319109

LOC647941 41.5421429082231 42.6939394537076 41.0356368374708  
36.890925044696 41.1868052124344 39.7394181011603 44.7255207589606  
44.5029690493211 38.9006788676407 41.3321861371202 45.0589947942306  
42.9887069977696

LOC647942 38.304249186058 41.7337506166619 44.6032218589199  
43.8002456102021 40.3452320167286 41.159706131351 41.706879587091  
46.7980335276155 42.4540072551568 49.6203214143464 43.5710871617107  
42.4607795638552

LOC647943 39.4710743516517 40.2493681589104 39.991353369336  
44.0451487108213 49.1928206164702 43.2805590023412 40.5585676679482  
43.3262148375525 40.5912213523345 42.3606390470387 38.745552403895  
42.7782216342806

LOC647946 42.5633441928261 45.123403685928 42.9544982810566  
39.9182914210537 40.3124262005404 41.4186558780356 40.6301588195752  
40.2382908228517 44.8003345643334 39.0648733099061 39.3895791800635  
41.7575097298927

LOC647947 49.540449125788 47.2055133646385 48.4890615340603  
47.8164193292842 50.8875036861067 48.3686935595826 48.4859552186772  
45.5581356216957 46.9739160257217 45.6868589181768 48.6184776976167  
42.0424641526302

LOC647949 39.266565827316 36.9994058279362 41.528370959196  
42.9358255168086 42.9090346219023 36.9060997041453 37.1643693306382  
43.9366081640576 36.8127605061228 39.8873706855774 43.9450023643394  
40.9683275553869

LOC647954 302.978457293429 269.438510636306 258.913621521866  
46.3203995372658 117.033529761587 65.3096524773304 191.426587373391  
411.73316510051 270.44099301072 98.4084364053686 155.378768637562  
84.3464768820344

LOC647955 42.442231667357 41.6466169548846 42.9104454767916  
42.1273928203021 37.7576900881741 40.650742261428 38.0598374201407  
41.8417024632349 47.9035532886869 38.0078357808393 40.9157352260901  
36.9976231206067

LOC647958 33.6902293666089 37.4540772310118 42.3536549114165  
33.6816578730693 36.9702228618069 36.6996187567892 39.5496902678788  
34.3865306339645 38.8271346375425 39.6719190054379 31.2564094916055  
35.3525469364579

LOC647960 37.1485601150873 43.5182502375207 36.769073068743  
46.7577982595088 38.9496515344837 42.357910063876 37.9430145836712  
40.5158867964016 39.6609238036815 42.4594149893798 42.4580504587581  
43.6753843488695

LOC647961 43.5710871617107 45.5842286511645 42.2577689927563  
37.29566077996 38.3561682218911 40.8634043028528 39.7576136507593  
44.5029690493211 43.1805016690297 35.195364621675 40.3452320167286  
42.357910063876

LOC647965 41.3387790895716 39.1982470626863 43.3085358214154  
37.29566077996 41.6806984441849 44.2607789091176 41.3594868055879



45.1714698794331 42.7150227340364 46.0119912782855 40.3452320167286  
40.1700117452801  
LOC647970 43.6706764143908 39.9697332660833 47.2962360458401  
45.0798408927912 46.1804647841331 46.574682061365 49.6872467499977  
41.4508241771315 43.3744503319109 43.9450023643394 38.4689132737495  
42.8864415494484  
LOC647971 41.6354649482853 47.4076235350059 43.6670755115848  
40.646702696033 43.9450023643394 46.8954576545929 36.8369172900902  
43.3262148375525 42.992884918158 44.2580151149956 44.7926323492519  
43.5738557773903  
LOC647972 43.5710871617107 36.6968906669565 38.3166554965434  
43.3078542962968 42.7107928951766 43.7630587657205 36.7356360093603  
41.6466169548846 36.2733735494625 32.2463318211725 40.4504608195666  
42.1537476443423  
LOC647974 42.6036491382658 39.2907645923217 44.9758339877851  
41.6564075217517 44.2607789091176 39.2985791324641 44.2166118829877  
43.7396619462033 41.2870505273664 38.957687788868 42.4580504587581  
44.8372404608604  
LOC647979 38.2083710281545 36.89524015739 35.0970060242246  
31.3142073726046 36.9702228618069 39.132725377815 37.6036146841933  
37.4484310268909 37.3600014814388 45.9004543328976 33.4071187618571  
41.4508241771315  
LOC647983 41.7397731376692 36.0366673493555 34.4716904283753  
32.554751989205 33.2021437980841 36.9060997041453 36.08956004634  
33.4534810696886 34.8552366193358 31.4813677993933 34.9428206949566  
35.3525469364579  
LOC647987 35.4287975493553 50.1027491117756 42.7303139017786  
42.4580504587581 38.3561682218911 39.7394181011603 39.2533668167483  
61.7572675712557 38.9834959368496 37.4302011516587 39.2542963855807  
41.0657892043496  
LOC647989 39.9697332660833 36.4002279956519 34.8956628705329  
39.2780515621926 33.7494761745342 40.9506062495231 36.4098694708483  
35.4526946152955 34.7722083264266 35.93950183586 34.174642681781  
30.9241129241985  
LOC647993 37.7384958256497 37.920964499903 41.785676764591  
44.7980740332174 37.0526522140242 36.2015763253919 41.8315602975157  
44.6107027295193 31.7063377004409 38.3092241935352 38.3684202018524  
38.6454098044474  
LOC647995 49.7188990489616 41.8073910693411 45.7968648044613  
46.3203995372658 43.004943518025 42.9695585740813 38.6243997507646  
44.9977782988116 43.9450023643394 45.0155543555707 41.1638563416981  
46.5650556481721  
LOC647998 43.4626049853157 44.7829632472754 39.4710743516517  
39.6292788039793 45.4751076037511 34.1806289878747 37.0564573649223  
42.2577689927563 31.5151915411476 41.4397539024976 50.3221380889396  
43.9541718254769  
LOC648000 2184.70038900784 2474.22199172028 1975.28674300761  
1783.87583818834 2184.70038900784 3465.3013599062 1201.00042684883  
1427.67429455277 1566.12726152736 2257.78227736778 2280.42953098693  
3217.83121827744  
LOC648001 41.2424637338424 46.2286164776607 43.5710871617107  
42.5664883002833 45.9104478407175 42.0574848021044 49.2546642180676  
49.5185112777773 43.6670755115848 41.7405682794166 44.6286581923295  
42.0424641526302

LOC648003 42.2455707947223 41.159706131351 40.8420925848403  
42.357910063876 45.3675390992851 46.0364000143537 39.0458123429605  
43.1567024035183 46.581796165231 44.8997235283254 40.1742127891824  
49.904979214379  
LOC648024 419.563859911367 680.279119780451 802.650020720921  
604.357590751951 728.468482500452 583.053232396803 531.869698775629  
246.500690127803 361.158558609751 119.301672388541 190.187931547806  
411.342959058326  
LOC648025 41.8409927585705 43.5182502375207 41.785676764591  
39.066284740632 45.3675390992851 44.4619248757502 41.4742337714895  
40.831207953647 51.3511088648386 38.1042454705119 38.956280281655  
34.0382693188794  
LOC648039 47.6397712007919 46.8954576545929 47.3861758958576  
51.0175677516029 52.2089306840125 47.2927436772465 48.0283573444179  
52.3068458655445 45.5779686360641 45.3530683538086 44.1148826235374  
42.6758568421347  
LOC648040 39.7576136507593 36.5219488315447 40.8420925848403  
38.6414316877471 40.5710637884029 41.0582900711341 37.3799542961839  
42.9301944191913 41.4636047919453 35.0082729554459 37.8372168909583  
43.0930293831497  
LOC648041 43.3638918705225 41.159706131351 37.1643693306382  
42.8235313007746 47.9128504683618 38.5252456306656 39.6535880152834  
41.8417024632349 38.8271346375425 39.4710743516517 36.3390947880186  
41.9430737035925  
LOC648044 46.263826584899 41.0678614026819 47.3861758958576  
55.2214187655851 44.6834648302383 42.9695585740813 50.0088611244948  
43.7396619462033 45.1899271235974 43.844855336215 41.3553369544097  
43.9541718254769  
LOC648050 43.2724556187214 33.4967065724734 37.3687900733549  
42.357910063876 38.745552403895 41.9543948167375 42.8684958525042  
37.6557714476853 42.0621425894624 39.8873706855774 38.079222289614  
39.7411455670172  
LOC648054 38.1169703906207 42.2577689927563 33.9435456570176  
39.7411455670172 39.6535880152834 41.0582900711341 37.6036146841933  
39.0620487644635 36.0741672064298 38.0078357808393 38.3684202018524  
47.2131144508464  
LOC648057 43.2724556187214 38.3322849790657 37.2838080935695  
40.9607305725196 43.7517118200398 41.9543948167375 39.5496902678788  
42.0494116081998 37.9273653326866 42.8936990772838 39.153226699662  
39.7411455670172  
LOC648058 42.8036731479932 48.7847528954724 44.7829632472754  
47.8164193292842 42.0709558258414 44.8872784170036 44.3440839686558  
44.9977782988116 45.0017158586743 43.844855336215 44.3763859390287  
42.9887069977696  
LOC648059 80.7462144785541 67.1299518044849 81.6486527718661  
79.4528447794527 65.5029051840465 54.8265655909623 71.3527183280827  
98.6401096175932 68.4229528414965 96.8240908274121 106.897106266912  
79.9447969637409  
LOC648064 42.3433931248155 46.3635803515159 45.4865173433646  
43.4410741327254 51.7983110178095 44.3648993568405 50.3519150282938  
44.293922970134 39.1790517315259 41.8613406887824 43.0971787292711  
40.9683275553869  
LOC648066 44.5282181324797 40.4359177791566 42.0621425894624  
43.074472921841 40.0599807618105 45.8325181856483 39.2533668167483

40.831207953647 46.2027193115397 42.8936990772838 45.390192977585  
44.0451487108213  
LOC648069 38.8561375693335 38.5252456306656 43.5710871617107  
39.1706564265495 52.2089306840125 45.3882138838137 44.2166118829877  
45.642304356051 43.7630587657205 42.3606390470387 43.5710871617107  
47.3992733452821  
LOC648080 41.0608773166058 45.7317208802318 43.6670755115848  
41.6564075217517 43.9450023643394 37.7000400506818 42.357910063876  
44.1311654985682 42.7150227340364 41.2276963324981 35.5179217192467  
41.5536168238478  
LOC648085 46.0920218698606 39.8695929627783 35.5220586859301  
41.4273122914951 39.2608760193011 35.8227939208521 54.6414321010929  
37.1317006162938 48.9931786790166 41.4397539024976 40.0766543123257  
38.0452862258803  
LOC648089 41.5689645295284 42.6022652963326 41.7419877611072  
43.4410741327254 42.1650127805175 41.2098211956301 40.9157352260901  
41.8417024632349 41.5296458719756 41.7932258301997 43.2551508830106  
38.8034431562381  
LOC648099 52.8427643366617 59.7686826549947 74.8071157013401  
73.5834042105313 83.2652824564032 101.383978726419 65.8986841086198  
70.5322939116406 70.2541961995753 72.0443425395404 74.7669841575348  
70.5322939116406  
LOC648103 46.6348258763289 41.7337506166619 40.4070046183108  
34.5425384901279 38.2496050953547 36.6271061451613 39.5496902678788  
38.5457716679071 37.4540772310118 33.2987269789328 36.2435874904689  
38.0452862258803  
LOC648111 41.8409927585705 38.1312950900467 40.7620472083159  
40.5484717678957 36.08956004634 40.4359177791566 42.357910063876  
36.43924066428 39.1790517315259 44.3648993568405 38.079222289614  
43.1805016690297  
LOC648117 41.3387790895716 42.2577689927563 40.5734458834617  
41.0726336841311 49.5666074434383 41.7627910693483 43.1931731665131  
39.2672712041774 37.2810767789306 49.3000844711116 44.7926323492519  
46.0633179231318  
LOC648123 39.0620487644635 35.5310164682026 37.4642807402741  
50.0526763693329 41.3755760434934 39.6251842352088 39.7576136507593  
39.4710743516517 39.0775870687758 42.2614524730856 37.5583886316038  
36.8690774823319  
LOC648127 40.9558083259517 44.6918600441328 38.9790184198145  
52.5307002738469 45.6895223823001 44.3648993568405 43.1931731665131  
42.0494116081998 42.357910063876 42.3606390470387 45.2265319826548  
43.1805016690297  
LOC648130 39.3709357615493 34.3715326040967 34.5718473203083  
32.3671711013873 38.8456942580061 39.4953494583071 35.7055410599146  
33.9687743313429 32.7294532998931 36.9102644736882 33.4071187618571  
33.939263369489  
LOC648132 40.0557788909923 45.8669209716694 49.2041300973417  
47.9915414951747 42.7107928951766 45.4882438975269 40.2154497375715  
45.3872406432794 44.0519245668737 46.1390887492649 46.0095710163378  
48.27609330316  
LOC648133 44.436995101921 41.7337506166619 41.0356368374708  
39.853175885492 42.7982502551634 41.554942319225 39.0458123429605  
42.157627240486 44.8003345643334 42.2614524730856 45.0589947942306  
40.8681871019812

LOC648138 39.0620487644635 36.6968906669565 40.7620472083159  
42.4580504587581 45.9104478407175 42.6575535390785 44.7255207589606  
43.2551508830106 43.1805016690297 45.2556760873335 42.4580504587581  
48.9733758107788

LOC648145 45.9090659324223 39.3999056968598 40.6737160001291  
43.5627649099623 43.4544762830742 43.3785777889265 46.3057385979341  
43.4544762830742 43.6670755115848 47.4767851750188 42.357910063876  
47.6938628797168

LOC648147 38.5648843914189 38.4330755397458 39.8299340037009  
37.29566077996 38.3561682218911 38.8336427948187 35.7055410599146  
41.0381860307445 39.2809305246091 39.0648733099061 38.8507804383261  
39.3575468494941

LOC648148 42.5193208629123 41.0678614026819 39.4710743516517  
37.0732977341185 42.7107928951766 42.5660695551615 36.7356360093603  
36.5393857306744 36.7267557061938 42.6793753550854 39.2542963855807  
41.2437378488025

LOC648149 42.1537476443423 42.3550738181144 45.989212296035  
42.5664883002833 40.6723334103791 43.8582747295766 41.1507980856436  
52.9813204449021 46.4861258030402 43.6033221838149 44.9713479185144  
49.5539622682049

LOC648153 44.0328992213727 51.3800036046133 55.4502804236424  
46.1673159982664 45.5809132232681 46.7800033479223 48.4859552186772  
38.1835938174625 51.2776048338 56.8201201798712 56.4873776344986  
47.3172462673426

LOC648154 42.3620028137457 36.5219488315447 44.1070537445005  
42.6913548400127 41.7929491793697 40.7063426028871 42.9803717121865  
44.4475838947656 42.4784375889044 41.4812544772644 41.0808257270221  
37.8129870676592

LOC648164 44.7599897211788 43.2649781354792 38.5442780220289  
42.357910063876 60.9710783023013 41.9069736908705 44.0687697278114  
44.1311654985682 43.423558862426 42.02667925031 40.6744071011875  
41.3948836161924

LOC648167 45.0985088502363 43.3458769998118 40.4070046183108  
42.4580504587581 46.0977687311222 40.1428591998404 36.7356360093603  
42.157627240486 39.0775870687758 37.7315666632629 38.956280281655  
35.1451084093692

LOC648169 37.7384958256497 41.2598458726002 50.3950981988762  
48.309866878365 43.5544347011646 51.1621379498014 44.0687697278114  
49.5185112777773 39.0775870687758 46.1390887492649 45.6348103033479  
46.4499258373233

LOC648170 36.3649677956953 42.2577689927563 39.8299340037009  
37.29566077996 41.2740822675592 42.8598805316863 48.1747307200218  
43.9366081640576 39.4762546236449 45.4614234442527 43.5710871617107  
37.5556299264699

LOC648173 43.1805016690297 44.3529919625344 47.4740726032707  
46.7577982595088 44.0451487108213 42.2577689927563 42.9803717121865  
42.5435283762933 43.4656637536244 44.4652605017595 45.5707650534259  
45.8546719310325

LOC648174 45.0985088502363 42.4493032770053 44.0451487108213  
45.7397504535169 40.8873907150245 42.157627240486 44.9863726205428  
44.7044140979108 37.4540772310118 44.8997235283254 42.7275315121163  
39.5418280570561

LOC648176 49.3463416794995 99.2824152850072 64.8254097948745  
62.6048727240291 60.5290966885203 55.0009147092272 66.3209349903185

72.2610650652674 67.591570323687 72.42732668079 72.4834467838798  
62.9904770954043  
LOC648189 54.4384603094793 70.3629652777935 60.8357760968871  
46.0228732507872 75.0665411373616 58.0910843932181 56.9320717885002  
48.87875862356 51.2776048338 47.1001757441025 52.2229654768933  
51.0013344286851  
LOC648196 53.7507429765038 56.7826399116207 58.112348043634  
61.7502624458447 52.2089306840125 50.6360662655392 52.7002314230604  
39.2672712041774 52.1186591838715 38.528621456378 54.8532558909227  
53.840976437122  
LOC648200 44.9896851005259 41.8848959280916 43.0971787292711  
38.3166554965434 48.1473938886239 41.0582900711341 42.629412460409  
45.5581356216957 45.9227107476843 42.8936990772838 40.6373400186325  
42.9887069977696  
LOC648205 36.8072833828297 38.1312950900467 38.5045333213784  
35.9521941716188 34.5301949364147 40.5281496800812 41.9393838138203  
37.86982638952 34.9428206949566 34.9138625012006 34.4716904283753  
37.6557714476853  
LOC648210 841.316771679857 1362.12587130194 1282.9181829891  
582.017297217368 1524.01520893763 1783.87583818834 910.898566308567  
1021.71286017481 1149.90692951795 607.042450917813 946.081492716653  
1615.83220398811  
LOC648211 35.0202257459026 43.5873188565519 44.4311655729487  
39.3750969348308 40.7779767565889 38.7340969861754 48.6395795163502  
42.0494116081998 38.4344387289956 46.1390887492649 39.9899430628542  
39.8497227447888  
LOC648213 42.1537476443423 41.6466169548846 41.8751578329365  
36.9912468186322 40.8873907150245 40.9506062495231 43.6753843488695  
41.9315419791594 45.5779686360641 40.8970401536578 43.7585538437696  
45.3763275588341  
LOC648217 46.0920218698606 43.7644428186265 36.178547300352  
43.1847628331565 40.7779767565889 42.0574848021044 40.0052661202207  
41.4508241771315 42.2577689927563 39.8873706855774 37.9230440150891  
44.0451487108213  
LOC648220 36.1232327599945 42.8542642792862 41.437237454134  
35.6027791404152 41.1868052124344 41.6590564937735 44.7255207589606  
44.293922970134 39.2809305246091 43.844855336215 34.3633615460307  
38.745552403895  
LOC648222 42.1537476443423 42.7775752471711 40.5734458834617  
37.8442841690502 42.1650127805175 43.8582747295766 41.4742337714895  
40.4359177791566 37.4540772310118 39.7835513496873 40.6373400186325  
39.8497227447888  
LOC648223 50.7390160399184 44.0409178714232 45.1569741609597  
58.7338159410728 46.5557478175976 46.0364000143537 45.7452456977857  
42.0494116081998 47.1744296124496 51.9547984751408 47.8988096575648  
40.3691324547049  
LOC648226 37.4554876386402 42.4493032770053 41.9666541498638  
43.1847628331565 44.2607789091176 40.650742261428 47.8947595316832  
45.4757965005055 45.4799270968969 41.3321861371202 41.7272875295469  
41.4508241771315  
LOC648230 36.0144420013819 35.2143190355414 42.7303139017786  
37.651298468202 36.08956004634 40.1428591998404 45.4799270968969  
42.357910063876 35.5220586859301 44.3648993568405 43.6629145624937  
39.2469742642337

LOC648237 37.8386378737561 43.7644428186265 45.063792968927  
42.4580504587581 42.7107928951766 42.0574848021044 44.4639405506967  
40.2382908228517 48.8842909466002 41.7405682794166 38.6662194645633  
38.8495095797881

LOC648240 38.2083710281545 38.4330755397458 39.2707964550441  
39.9697332660833 35.1411239266238 39.6251842352088 46.9929836306816  
38.5457716679071 37.0126425326534 43.0919221375514 34.064698871541  
34.806104801006

LOC648245 44.3355304829989 45.4882438975269 43.8495248991589  
44.7980740332174 44.147557390293 43.5752393599169 39.5496902678788  
43.7396619462033 44.5303781239209 39.5637454855233 42.2618615571566  
44.3521099857368

LOC648249 651.795139128843 823.933615182634 1023.81381775221  
744.762787024945 3465.3013599062 1485.68317899614 1096.1705171588  
607.431621448599 1053.67279913417 1257.19844370057 996.520340280883  
1205.82775512007

LOC648251 42.8036731479932 44.7829632472754 42.0621425894624  
46.8954576545929 47.5647821785529 46.0364000143537 41.5817737564592  
43.4544762830742 44.619512785899 51.5855515705917 49.7363778831003  
48.8670821164567

LOC648253 42.442231667357 41.3610369241157 42.7303139017786  
40.3180310664156 42.7107928951766 38.9378717994178 46.0228732507872  
42.7431359850339 46.4164127487052 43.1839109702714 44.2925355984056  
48.9733758107788

LOC648256 44.2718517563299 40.8880530359822 45.3974838013476  
48.1662933382789 44.4489662507893 44.812853905056 43.8206425661746  
47.1345949868029 50.1603795873336 43.781101409552 46.1673159982664  
47.2862299990938

LOC648257 36.6480005877129 36.5219488315447 34.8956628705329  
35.8472302065546 33.8558232866797 38.6414316877471 33.6696565339534  
35.1738399826814 36.5393857306744 31.6981395162348 34.3633615460307  
33.939263369489

LOC648262 45.3872406432794 38.5252456306656 45.7968648044613  
39.853175885492 35.7973685350741 43.3785777889265 44.2166118829877  
44.0390019242862 41.9635525160083 39.3698811593364 43.0971787292711  
40.2669497398702

LOC648264 41.9407041937973 35.5310164682026 38.3166554965434  
32.6817359372544 42.3685136297603 33.5578650644246 35.0305278582179  
35.5798430594271 39.7537274655115 33.7883338848419 37.5583886316038  
38.5279745308203

LOC648271 41.4508241771315 40.3384318592985 42.2577689927563  
44.1483976313959 37.1565984182084 44.0804700754786 42.357910063876  
42.357910063876 40.3316153483289 41.3321861371202 37.7384958256497  
45.3763275588341

LOC648274 35.9305494063137 44.5884811528117 34.8956628705329  
42.5664883002833 41.467005949568 40.5281496800812 42.8684958525042  
35.3608605269276 40.0403898620771 39.4710743516517 41.1638563416981  
36.6603338274678

LOC648277 41.0608773166058 47.087835967892 46.9040704638073  
46.3203995372658 48.6224651100733 43.5752393599169 37.9430145836712  
46.5717043290731 46.4164127487052 53.7196173866021 42.8263096141654  
45.6692241948108

LOC648278 37.9387791625384 40.4359177791566 44.0451487108213  
36.1562979552173 43.4544762830742 36.2768299545794 41.0381860307445

38.3684202018524 35.1155486926999 37.8217989841918 32.1218888714537  
35.8429598823818  
LOC648287 34.9138625012006 45.6533175604486 38.5045333213784  
37.9875302985336 42.1650127805175 41.0582900711341 47.8947595316832  
40.2382908228517 41.863927676552 39.6719190054379 45.5707650534259  
45.2783024981315  
LOC648289 38.7537364570873 42.2577689927563 40.5734458834617  
45.334106390212 38.3561682218911 38.8336427948187 48.8319884367456  
43.0390857698452 40.5912213523345 41.0057887014368 41.2598458726002  
45.4799270968969  
LOC648293 43.632365631458 49.7949228653588 47.4740726032707  
45.2759158146116 49.3984571719129 47.5216423686268 36.9976231206067  
47.4740726032707 47.0055981216687 45.9426591985894 46.2560238004757  
47.9566297250148  
LOC648302 47.1962846565261 46.9919960628953 44.4311655729487  
46.0228732507872 42.7107928951766 42.5660695551615 48.1747307200218  
44.6107027295193 48.4869909888679 43.2988017098387 44.8872784170036  
46.5650556481721  
LOC648304 44.0328992213727 50.543526404059 46.8267540220952  
40.0698728584484 37.956732373465 51.3886035574416 48.4859552186772  
47.6952179922944 39.7537274655115 40.8970401536578 38.4689132737495  
49.8253396161069  
LOC648309 39.8662795144616 46.2286164776607 43.0971787292711  
49.5424425850549 41.9842695818285 46.4648868771662 36.3194282084339  
49.085741080241 39.3750969348308 36.5806287103157 42.0750889188255  
42.8864415494484  
LOC648329 41.9407041937973 38.4330755397458 40.6737160001291  
39.3750969348308 37.4470183315826 38.7340969861754 42.9803717121865  
36.5393857306744 39.853866204927 39.7835513496873 37.5583886316038  
40.3691324547049  
LOC648342 42.9104454767916 45.8669209716694 47.4740726032707  
38.4208429103799 44.4489662507893 43.8582747295766 42.8684958525042  
39.853866204927 48.1174861108648 42.0621425894624 43.5710871617107  
42.0424641526302  
LOC648343 64.0759817636265 80.0502531022254 81.382229980722  
99.5958921252583 70.2565873027242 89.0495215957248 72.6959688212342  
76.2258667419953 77.7907484334847 79.262977183608 64.5722284870633  
109.14984236229  
LOC648346 38.957687788868 37.5469247328848 44.7829632472754  
42.357910063876 37.1565984182084 38.5252456306656 38.7337086062875  
39.4710743516517 35.1155486926999 36.2435874904689 32.775958132716  
36.1647506311964  
LOC648354 33.8558232866797 44.8529259387308 40.1985790927248  
47.8164193292842 37.956732373465 39.9397419279057 35.9058393060637  
41.3506832276112 42.9020321355927 40.8049408996274 39.5399188536544  
45.1735152121056  
LOC648358 47.3791873993182 42.6022652963326 39.2707964550441  
48.9944486068347 43.5544347011646 40.650742261428 45.7452456977857  
39.6474008369935 39.0775870687758 45.2556760873335 41.4508241771315  
39.6352613956998  
LOC648359 40.0557788909923 41.3610369241157 42.640829914102  
36.9912468186322 40.8873907150245 40.1428591998404 50.6774883370457  
44.0390019242862 39.5806465938526 44.3648993568405 47.299647867533  
40.8681871019812

LOC648362 35.5179217192467 36.6002100641539 37.2838080935695  
37.8442841690502 35.1411239266238 46.8954576545929 43.0930293831497  
39.4710743516517 36.6312676076142 38.0078357808393 43.4709415392696  
45.3763275588341

LOC648364 33.0463640202858 32.5482839399637 36.3604951341921  
39.6292788039793 33.5412189543102 44.7804080899431 32.2133093774284  
38.745552403895 32.6039814489621 41.7405682794166 35.860430241131  
38.9496515344837

LOC648365 37.0320432433314 40.6380495994768 33.1559412791294  
38.745552403895 40.4639532172338 41.4508241771315 46.8613212048981  
40.7311497914871 37.5469247328848 36.4651112441576 40.3452320167286  
37.9607839934735

LOC648366 47.6397712007919 59.2643906275025 56.1434024065079  
71.5249259772583 55.3100442506299 46.1513019317765 55.9276266345493  
50.0526763693329 51.5229124652769 43.0919221375514 47.8988096575648  
51.7833333848627

LOC648370 41.9407041937973 37.5469247328848 39.8299340037009  
38.5252456306656 42.7107928951766 39.6251842352088 40.4359177791566  
36.0306975524309 42.992884918158 35.195364621675 34.9428206949566  
34.5633623842083

LOC648374 39.6609238036815 40.4359177791566 44.6032218589199  
40.8681871019812 40.6723334103791 44.0804700754786 42.8684958525042  
38.3684202018524 37.9273653326866 40.7063426028871 42.357910063876  
42.4607795638552

LOC648377 41.8409927585705 39.6123051184545 43.7630587657205  
41.3027031037343 41.0885562160946 39.2248354955045 42.8684958525042  
42.8482181313226 41.3803269429468 39.0648733099061 36.8282383070068  
38.3291713594599

LOC648392 44.5282181324797 40.7952353240579 41.3366779545815  
48.665578118898 42.7982502551634 44.5544727111028 40.2154497375715  
39.4710743516517 51.4413099192899 46.6598879466655 39.8184668132023  
46.0633179231318

LOC648394 54.5358897781765 48.0296332183129 59.8273072817267  
56.2508140932179 60.4122350478242 47.0027453663546 39.2533668167483  
51.8347877274018 51.7549258776884 43.401782064778 44.553780984244  
46.8129509799753

LOC648398 39.9697332660833 39.2907645923217 44.4311655729487  
46.8954576545929 42.7982502551634 47.8636003588181 40.7910160811527  
42.5435283762933 43.1805016690297 43.2988017098387 41.5421429082231  
41.4508241771315

LOC648399 43.0930293831497 39.3999056968598 43.1931731665131  
41.4273122914951 42.1650127805175 50.0748292497578 46.0228732507872  
42.8482181313226 42.4540072551568 41.2276963324981 45.390192977585  
43.1805016690297

LOC648403 44.6231541342 42.1607322031054 37.1643693306382  
44.0451487108213 41.0885562160946 37.4782441311626 37.1643693306382  
37.2237132058632 38.5252456306656 39.9948390976317 41.6336636285875  
38.745552403895

LOC648405 40.3478825593224 42.5269793679335 40.8420925848403  
44.9370339275041 38.8456942580061 41.8613406887824 39.6535880152834  
42.7431359850339 40.0403898620771 43.0919221375514 43.401782064778  
42.357910063876

LOC648408 48.0201377454632 44.2630383225933 43.7630587657205  
39.7411455670172 43.4544762830742 45.4882438975269 50.6774883370457



39.6474008369935 48.9931786790166 45.5776159432079 42.4580504587581  
48.8670821164567  
LOC648415 41.2424637338424 48.3699741879723 43.5710871617107  
52.5307002738469 46.5557478175976 39.132725377815 44.6032218589199  
44.797320243931 42.8036731479932 43.4885245598939 46.1673159982664  
46.6397391251762  
LOC648424 37.4554876386402 37.5469247328848 34.4716904283753  
35.6027791404152 44.9936360641969 37.7000400506818 33.9750800030909  
36.43924066428 35.2143190355414 34.8137085420423 37.0180934800573  
37.1747156131306  
LOC648432 44.1294459089314 41.0678614026819 40.931294690669  
45.5869891570251 46.5557478175976 39.2248354955045 42.4939802311136  
39.853866204927 40.9901805728485 46.1390887492649 46.0095710163378  
44.2527566343661  
LOC648434 43.9309845324767 48.5905518770847 50.0050760710506  
58.5406981871153 60.0736861987141 53.3185097662527 53.7423898357583  
39.9576138799997 44.2607789091176 46.6598879466655 49.8393069675192  
46.5650556481721  
LOC648438 41.4508241771315 40.4359177791566 42.3536549114165  
43.4410741327254 43.844855336215 47.0027453663546 38.941855825269  
42.7431359850339 44.619512785899 40.1179210534118 41.9908237694988  
38.5279745308203  
LOC648447 38.385865183581 40.7952353240579 39.3709357615493  
35.2143190355414 48.3814421939888 35.9305494063137 37.1643693306382  
38.5457716679071 39.7537274655115 37.2089297656361 33.6080693875435  
37.0953622406687  
LOC648453 42.0532901689036 45.1694246393676 39.991353369336  
43.3078542962968 38.6454098044474 43.9724628401189 39.8695929627783  
44.2159020605784 41.4636047919453 40.8970401536578 42.4580504587581  
41.3481355128089  
LOC648454 45.0985088502363 44.8529259387308 44.5134109184888  
41.5464765641928 44.3557408297309 44.2607789091176 44.6032218589199  
39.9576138799997 39.0775870687758 47.8207974930031 41.3553369544097  
35.6427313468066  
LOC648456 44.5282181324797 42.9358255168086 43.1931731665131  
46.7577982595088 46.7508829977587 44.8872784170036 46.5650556481721  
44.1311654985682 42.2577689927563 43.844855336215 41.5421429082231  
43.8575940017119  
LOC648460 42.442231667357 43.5873188565519 42.3536549114165  
42.5664883002833 43.844855336215 44.8872784170036 46.5650556481721  
41.4508241771315 47.1744296124496 48.3693338695392 44.9713479185144  
42.1537476443423  
LOC648469 39.6609238036815 36.1232327599945 39.4710743516517  
37.5382094267692 40.5710637884029 37.5887129572848 40.2154497375715  
38.8495095797881 42.7150227340364 43.9450023643394 43.7585538437696  
45.6692241948108  
LOC648470 72.1066584199167 62.0908175930716 72.2016884438365  
77.0774476767901 44.147557390293 66.5234828659154 36.5352572191451  
47.9942520395434 38.5252456306656 66.0786923699684 63.664265793911  
53.3904307221902  
LOC648473 42.9104454767916 40.5400384479766 38.6005272730664  
41.1886975241176 38.745552403895 42.2577689927563 40.3302268293707  
42.9301944191913 38.8271346375425 36.6893251782922 37.3687900733549  
37.5556299264699

LOC648476 39.2076937845359 38.861780967827 42.6920011548175  
40.8681871019812 41.9842695818285 44.0804700754786 47.1345949868029  
46.1159021593282 43.3744503319109 40.3235655331796 45.9725715538987  
43.4290452504928

LOC648480 35.4287975493553 36.89524015739 40.0998167098057  
39.853175885492 40.3452320167286 36.6996187567892 35.2163900400329  
38.956280281655 38.7298222155532 43.6033221838149 38.079222289614  
38.2350720635382

LOC648481 35.8208542506595 41.3610369241157 38.9790184198145  
41.6564075217517 47.5647821785529 40.4359177791566 32.8745892439217  
43.844855336215 44.7058233759912 39.4710743516517 40.9157352260901  
38.2350720635382

LOC648487 42.7150227340364 42.2577689927563 41.8751578329365  
45.0798408927912 38.6454098044474 42.157627240486 45.223075311113  
42.9301944191913 41.4636047919453 44.4652605017595 45.2265319826548  
42.8864415494484

LOC648489 43.1805016690297 41.2598458726002 46.0727230219512  
51.223859150798 37.1565984182084 43.6670755115848 46.1634822993009  
40.831207953647 42.1594905198929 45.4614234442527 44.8872784170036  
45.4799270968969

LOC648490 58.651329686676 51.0175677516029 53.7792717770978  
47.3574589211166 58.2780916793348 48.260931742163 63.0119737420787  
56.8094693588238 55.6617952786921 56.685925255591 54.8532558909227  
48.27609330316

LOC648494 45.8108990837624 48.4980626712175 64.5232087947596  
47.3574589211166 52.9433495155796 58.6439719071099 48.6395795163502  
45.4757965005055 56.3441077510744 46.5650556481721 46.6442692119997  
41.6550823405646

LOC648496 39.6609238036815 42.9358255168086 48.6037684272115  
42.2496337895968 42.0709558258414 44.8872784170036 44.2166118829877  
39.6474008369935 48.5792058061372 43.0919221375514 40.8225507267584  
45.2783024981315

LOC648500 47.2862299990938 47.1332119496722 60.8357760968871  
44.4367387274922 52.2089306840125 53.7442594289333 55.4004611309636  
43.4544762830742 43.2761454096265 47.0055981216687 49.532546810992  
41.3481355128089

LOC648502 38.7537364570873 43.683792219729 39.2707964550441  
33.3231576795423 36.4434672195785 37.1317006162938 42.629412460409  
41.0381860307445 54.4912806027381 38.4187686307607 37.5583886316038  
36.6603338274678

LOC648509 43.6706764143908 52.683711208052 51.6159542017038  
50.2163892855092 65.3933030211114 47.0940613507321 44.0687697278114  
46.2779564481158 41.7627910693483 43.1839109702714 51.7538628098347  
52.5752569429057

LOC648517 41.2424637338424 42.1607322031054 44.8872784170036  
46.8954576545929 55.4919197421746 42.357910063876 45.8980298854198  
44.0390019242862 50.1603795873336 46.8954576545929 46.5650556481721  
47.6938628797168

LOC648521 40.4639532172338 42.0709558258414 39.0775870687758  
36.3604951341921 36.4434672195785 41.7627910693483 39.0458123429605  
41.1575777497576 38.3418933808844 41.4397539024976 40.6373400186325  
40.6614700944853

LOC648526 326.805803266857 351.039814818516 120.660602388292  
48.856176220627 101.017461500409 108.246687420741 108.945545005203

98.6401096175932 114.483475728117 120.129857395808 85.3930226794591  
101.403739410832  
LOC648527 38.0089018744739 37.2810767789306 38.1421709520616  
37.9875302985336 35.4484652445078 40.1428591998404 35.1307934330047  
38.956280281655 37.7384958256497 39.4710743516517 37.1059647239814  
33.4316681623175  
LOC648533 37.55264801907 36.7976562409506 39.1799070031819  
41.6564075217517 37.7576900881741 40.040778349137 40.7910160811527  
39.1652965788406 41.074824727477 41.5435611403119 43.9450023643394  
43.1805016690297  
LOC648541 49.6241203903354 41.6466169548846 44.2405728317107  
44.265834798964 43.844855336215 39.6251842352088 44.7255207589606  
45.7476095696859 43.1805016690297 42.0621425894624 46.8954576545929  
40.6614700944853  
LOC648548 46.0920218698606 42.0709558258414 46.1653991089885  
57.6511495792664 43.1252272136667 42.6575535390785 44.6032218589199  
42.2577689927563 42.5406888281114 46.6598879466655 44.9713479185144  
43.1805016690297  
LOC648552 45.3872406432794 42.1607322031054 43.9450023643394  
44.4367387274922 43.5544347011646 40.9506062495231 44.0687697278114  
40.1474543172332 45.4799270968969 41.6373771565199 45.0589947942306  
44.8372404608604  
LOC648553 42.8036731479932 44.8529259387308 39.3709357615493  
46.0228732507872 41.8806343997257 42.4580504587581 46.9929836306816  
42.0494116081998 42.4540072551568 38.745552403895 44.9713479185144  
40.8681871019812  
LOC648556 46.0023068797812 43.8495248991589 43.9450023643394  
41.7614975630362 46.5557478175976 48.5835484742456 39.0458123429605  
41.1575777497576 47.1744296124496 45.2556760873335 40.723990462047  
39.0536056496869  
LOC648568 37.3463875295726 39.8695929627783 37.2838080935695  
39.1706564265495 45.2556760873335 44.1737502492846 42.357910063876  
42.5435283762933 38.2215591930186 38.6454098044474 39.0550139257658  
39.9519547348106  
LOC648569 42.8036731479932 46.4861258030402 48.7039705048129  
45.1944222548351 43.9450023643394 36.4986986135769 46.3057385979341  
45.0972184964705 44.5303781239209 46.8954576545929 42.911855821602  
40.7704587752083  
LOC648570 63.200752695983 35.1224289925572 36.9795961564828  
40.3180310664156 36.6354013629791 37.8102105794655 41.253645578517  
40.4359177791566 37.4540772310118 41.6373771565199 36.5359455830388  
37.9607839934735  
LOC648576 36.5393857306744 40.2493681589104 41.3366779545815  
43.074472921841 38.745552403895 42.9695585740813 45.3597029614942  
42.4580504587581 38.0213051227859 39.6719190054379 40.9157352260901  
41.6550823405646  
LOC648581 73.0970339739187 103.569150754726 82.5344501505114  
71.1583251698218 111.877209777434 83.7019398654324 108.558977253184  
77.523734787944 144.633447485038 64.8549209064366 88.0877175295544  
61.6311118308635  
LOC648585 44.5732978059923 44.5884811528117 48.3570240922825  
44.550322123994 64.8154690917175 47.2927436772465 43.8206425661746  
46.1673159982664 44.9713479185144 45.731442524732 41.0050831223107  
45.0673109728911

LOC648590 38.8561375693335 42.0709558258414 42.9104454767916  
40.8681871019812 45.4751076037511 37.7000400506818 42.0605906240248  
40.7311497914871 48.0163377492228 40.6022003765153 42.5426057453993  
42.1537476443423

LOC648596 45.4799270968969 42.7775752471711 49.5424425850549  
46.0228732507872 47.0954207417646 43.2805590023412 42.9803717121865  
40.931294690669 44.4395580493118 42.2614524730856 47.4630625313159  
49.8253396161069

LOC648600 40.3478825593224 46.1569135229922 45.5883690965192  
41.0726336841311 41.5668884168669 36.9060997041453 39.1539892144371  
40.1474543172332 41.6616444147804 42.0621425894624 46.0095710163378  
50.2163892855092

LOC648603 43.7585538437696 41.6466169548846 41.6977706798234  
43.1847628331565 36.2048942610546 40.4359177791566 44.3440839686558  
42.9301944191913 39.6609238036815 44.3648993568405 44.9713479185144  
38.2350720635382

LOC648604 40.2543341073001 36.0366673493555 44.7829632472754  
42.6913548400127 34.2638875325204 48.3686935595826 40.6750540874299  
40.047314525032 37.4540772310118 35.2880714952489 39.2542963855807  
36.8690774823319

LOC648605 48.3451401499671 48.0296332183129 52.0742951366864  
54.3753177017125 68.3234331335073 55.4976873017435 50.3519150282938  
47.5439485437351 45.5779686360641 52.8496345990125 46.0513515682555  
54.4313108506244

LOC648608 42.7150227340364 38.9338521051669 36.2683886571585  
37.9875302985336 35.7973685350741 36.8059561571675 40.0052661202207  
35.3608605269276 32.1218888714537 35.0082729554459 39.9899430628542  
35.2448979801094

LOC648609 44.436995101921 41.554942319225 47.0055981216687  
43.5627649099623 42.7982502551634 45.0882356578404 47.5963750520409  
42.5435283762933 41.7627910693483 48.3693338695392 46.1673159982664  
43.8575940017119

LOC648612 37.6397652536077 38.6414316877471 38.9790184198145  
37.0732977341185 37.2567512265363 36.0306975524309 37.9430145836712  
41.6466169548846 34.7722083264266 39.5637454855233 36.3390947880186  
36.6603338274678

LOC648615 44.1294459089314 41.2598458726002 39.3709357615493  
42.4580504587581 38.745552403895 43.8582747295766 44.4639405506967  
42.6450179841129 46.4164127487052 44.571915452417 43.4709415392696  
43.8575940017119

LOC648620 41.5421429082231 40.9731067463382 45.1569741609597  
43.8002456102021 39.6535880152834 43.0860383229288 44.2166118829877  
41.1575777497576 48.3954967265007 42.2614524730856 47.1477056711335  
44.0451487108213

LOC648622 1271.62760896761 1061.61186520958 1598.78859278229  
1626.71747158994 1478.26733379357 1956.75875151802 775.931494648677  
2830.73694055758 1173.47285626656 2184.70038900784 1796.47241860175  
2545.03032507597

LOC648623 47.9175508887533 44.9370339275041 44.1452943804044  
44.9370339275041 42.269054475455 36.8059561571675 42.0605906240248  
43.7396619462033 42.0621425894624 46.1390887492649 42.2618615571566  
42.4607795638552

LOC648625 35.2267149016596 44.3529919625344 42.3536549114165  
41.8778873678551 43.2484996523549 41.9543948167375 38.8417151851134

44.1311654985682 44.8003345643334 43.6033221838149 44.8872784170036  
44.6484005362281  
LOC648626 38.304249186058 40.5400384479766 37.4642807402741  
37.8442841690502 35.9058393060637 40.244271403831 41.1507980856436  
37.0390589468421 41.863927676552 35.2880714952489 41.0050831223107  
40.5703581862752  
LOC648628 43.3638918705225 41.159706131351 40.931294690669  
37.8442841690502 38.9496515344837 36.8059561571675 39.4600924554505  
39.3709357615493 42.992884918158 41.1222709786153 43.3085358214154  
42.7782216342806  
LOC648629 40.6559419616644 39.1982470626863 44.696023817801  
43.9282059368202 43.5544347011646 44.4619248757502 46.7100796279384  
43.1567024035183 39.6609238036815 41.4397539024976 42.357910063876  
42.2577689927563  
LOC648638 85.4713284900688 67.9697948557876 76.3583555666815  
66.5921967967793 49.7235523248653 70.8674195845729 77.2154078285418  
119.738288633084 91.9291200887492 76.5960150436512 64.6446465846487  
92.4350913779886  
LOC648639 38.5007204246293 40.716553247236 35.5220586859301  
42.4580504587581 43.6587492470348 41.3553369544097 39.3585350448719  
36.7460922671619 42.1594905198929 41.5435611403119 38.2795150354677  
43.4709415392696  
LOC648645 36.1232327599945 41.4508241771315 45.5883690965192  
42.9358255168086 38.745552403895 44.0804700754786 41.4742337714895  
45.4757965005055 48.5792058061372 43.7303813515864 42.4580504587581  
41.2437378488025  
LOC648657 41.0608773166058 42.5269793679335 43.0016969050339  
48.856176220627 42.7107928951766 47.6803619768589 44.0687697278114  
39.1652965788406 37.9273653326866 46.1390887492649 39.9899430628542  
38.5279745308203  
LOC648659 41.1523487516364 43.8495248991589 53.2046867327331  
40.5484717678957 45.3675390992851 56.4819802857598 48.3411413510851  
55.5578334877425 48.3119523820103 53.0357938671646 54.7061116419212  
59.0894921452893  
LOC648667 40.9558083259517 40.7952353240579 35.5220586859301  
39.5050383901884 39.0564222526273 38.2293008890613 36.634024014558  
42.6450179841129 35.9645119596869 43.2988017098387 38.3684202018524  
37.7526485343328  
LOC648668 35.8208542506595 40.6380495994768 37.7384958256497  
45.8844325913247 41.6806984441849 37.7000400506818 43.9450023643394  
41.3506832276112 43.5669306063196 43.4885245598939 43.844855336215  
36.7762265039864  
LOC648672 42.0532901689036 38.1312950900467 34.1806289878747  
51.5913529948887 47.5647821785529 46.1513019317765 43.3262148375525  
40.931294690669 42.2577689927563 47.9056710878325 40.6373400186325  
39.5418280570561  
LOC648674 40.3478825593224 35.9305494063137 38.6727842796202  
40.0698728584484 39.1650142708257 38.4330755397458 37.7136011474903  
38.2782436497441 42.7150227340364 39.2623423164488 40.1742127891824  
44.2527566343661  
LOC648680 37.55264801907 37.2810767789306 33.553634633839  
36.0481934423077 32.771863438151 35.5158505219112 37.4772922422734  
34.2814697823693 39.0775870687758 36.0481934423077 40.6373400186325  
33.4316681623175

LOC648682 40.8681871019812 41.7337506166619 42.3536549114165  
36.1562979552173 38.2496050953547 37.9003288112261 38.0598374201407  
41.9315419791594 43.8482802038826 37.920964499903 40.9157352260901  
36.6603338274678  
LOC648684 50.5670783769975 48.4980626712175 49.1067959632109  
51.223859150798 47.0954207417646 52.5330333302271 53.0277416531043  
48.9826868640753 50.6750785584772 47.7180816682562 46.6442692119997  
50.1579724208315  
LOC648689 43.1805016690297 43.3458769998118 53.1491634301682  
50.378948785456 39.4693871570028 45.7300501624017 46.9929836306816  
42.357910063876 47.798305839406 44.2580151149956 42.357910063876  
40.3691324547049  
LOC648691 44.8914371498528 45.0115870036541 45.2313723727673  
40.9607305725196 42.4864576619427 42.5660695551615 39.1539892144371  
41.0381860307445 39.3750969348308 43.1839109702714 35.6970528713709  
41.7575097298927  
LOC648695 135.997802304719 203.870471031175 225.120999402048  
106.712703356565 279.901217752341 151.225738885272 186.504623165619  
161.156612172544 231.304658157247 69.8941497035747 96.9158008116945  
162.352052340273  
LOC648699 42.1537476443423 44.4411734611229 44.5134109184888  
45.8844325913247 47.5647821785529 43.2805590023412 46.1634822993009  
43.3262148375525 45.4799270968969 46.325232414659 42.7275315121163  
45.5800840647989  
LOC648700 35.9305494063137 45.2556760873335 41.528370959196  
40.0698728584484 38.0598374201407 40.040778349137 49.2546642180676  
41.2551966132486 42.5406888281114 39.7835513496873 44.7114813656401  
44.2527566343661  
LOC648704 37.3463875295726 42.3550738181144 39.4710743516517  
38.4208429103799 42.1650127805175 42.2577689927563 40.5585676679482  
42.9301944191913 43.9450023643394 33.4316681623175 43.7585538437696  
39.8497227447888  
LOC648705 41.2424637338424 40.4359177791566 35.9305494063137  
37.651298468202 42.9090346219023 41.4508241771315 39.4600924554505  
44.9977782988116 39.1790517315259 41.8613406887824 42.5426057453993  
35.3525469364579  
LOC648706 45.2875173643252 40.148780650831 52.9111155236961  
48.856176220627 43.9450023643394 43.0860383229288 46.9929836306816  
44.6107027295193 42.8036731479932 46.5650556481721 43.4709415392696  
42.2577689927563  
LOC648710 40.3478825593224 39.0894172982439 37.5597671487621  
51.3851157261451 39.859345745831 39.7394181011603 35.4623691645629  
40.1474543172332 40.5912213523345 34.7308008643142 41.4508241771315  
32.7800533388945  
LOC648716 40.6559419616644 42.6022652963326 43.9450023643394  
53.4785152499923 41.5668884168669 42.4580504587581 39.5496902678788  
43.7630587657205 42.846832824953 41.9097689475185 42.357910063876  
42.8864415494484  
LOC648718 47.7267190613906 46.7591817286632 40.931294690669  
45.8844325913247 49.1928206164702 45.3882138838137 44.4639405506967  
38.079222289614 44.1519466943185 43.2988017098387 47.3791873993182  
39.4490233720848  
LOC648732 43.3638918705225 44.8529259387308 41.3366779545815  
39.1706564265495 43.3332476888305 43.7630587657205 52.0942589368478

45.0972184964705 40.9901805728485 44.6918600441328 47.5439485437351  
44.0451487108213  
LOC648733 45.4799270968969 44.5152708955623 40.4882741869718  
39.7411455670172 43.4544762830742 41.159706131351 41.4742337714895  
43.0390857698452 39.0775870687758 43.1839109702714 47.0940613507321  
38.4330755397458  
LOC648735 43.9309845324767 35.4484652445078 41.528370959196  
40.1804147506786 45.3675390992851 51.0506441018166 43.0930293831497  
43.3262148375525 42.2577689927563 37.8217989841918 44.9713479185144  
45.7562276914441  
LOC648738 41.5421429082231 39.0102066700839 45.989212296035  
43.1847628331565 38.8456942580061 35.6125439901743 42.4939802311136  
41.5464765641928 41.6616444147804 43.844855336215 42.7275315121163  
52.1186591838715  
LOC648744 50.4872122867759 45.1694246393676 50.0748292497578  
51.3851157261451 44.147557390293 42.750861693377 49.3854238365325  
48.3590401011623 38.6322728994674 46.5650556481721 47.299647867533  
49.7336769474446  
LOC648745 37.0320432433314 41.6466169548846 39.9101908547397  
37.4223289687135 34.7018263647985 34.6977013306396 35.7055410599146  
41.1575777497576 35.2143190355414 43.2988017098387 28.4576210094757  
34.9138625012006  
LOC648748 42.7150227340364 42.8542642792862 40.4070046183108  
44.0451487108213 40.0599807618105 43.6670755115848 37.2892641289258  
44.0390019242862 40.137818555383 38.4187686307607 41.4508241771315  
49.5539622682049  
LOC648749 40.3478825593224 44.8529259387308 42.3536549114165  
56.2508140932179 34.7018263647985 43.1826328292558 42.629412460409  
44.2159020605784 44.3440839686558 47.8207974930031 47.2134341420411  
46.5650556481721  
LOC648751 45.6517320730042 43.683792219729 45.3974838013476  
48.4916117779992 39.5595233162192 42.5660695551615 40.5585676679482  
41.1575777497576 42.9020321355927 43.4885245598939 37.4642807402741  
43.7672102682067  
LOC648752 44.5282181324797 36.5219488315447 40.931294690669  
38.6414316877471 40.0599807618105 38.9378717994178 44.8643898647322  
33.0038344711883 42.4540072551568 39.8873706855774 35.6041926503637  
38.0452862258803  
LOC648754 43.9309845324767 41.4508241771315 47.4740726032707  
45.8844325913247 44.147557390293 40.5281496800812 40.5585676679482  
40.2382908228517 47.27543600687 43.2988017098387 45.5707650534259  
42.2577689927563  
LOC648758 44.5798743103596 43.1805016690297 43.4709415392696  
41.1886975241176 42.2455707947223 42.2114134935898 42.1157692936428  
41.5934628038429 43.6670755115848 39.5637454855233 39.7576136507593  
39.6833800000587  
LOC648761 41.5421429082231 39.5050383901884 45.2313723727673  
50.7046706880325 47.9128504683618 42.8598805316863 48.0283573444179  
44.9977782988116 46.3203995372658 51.7594352155304 48.6184776976167  
46.0633179231318  
LOC648763 42.6036491382658 41.9894412416874 42.9104454767916  
44.3638402537972 44.4489662507893 42.157627240486 41.5817737564592  
39.8965727231863 42.5406888281114 42.3606390470387 41.5668884168669  
41.6031169661721

LOC648775 44.3355304829989 41.4508241771315 43.1931731665131  
42.9358255168086 38.745552403895 36.9060997041453 43.3262148375525  
42.8482181313226 42.6366765186182 35.93950183586 37.1059647239814  
38.8495095797881

LOC648790 34.1336988442837 42.6022652963326 40.0998167098057  
41.3027031037343 36.6354013629791 42.750861693377 35.1307934330047  
34.5886782974123 41.5635499110307 41.1222709786153 39.4410515050885  
40.9683275553869

LOC648791 57.6285775590145 43.683792219729 48.8100349749783  
40.5484717678957 45.1137938810047 42.9695585740813 50.2016912396771  
39.4710743516517 116.839274984089 42.6793753550854 44.4688999098904  
50.7487159427973

LOC648792 39.266565827316 41.3610369241157 35.0970060242246  
41.6564075217517 37.3508690072156 35.9305494063137 31.6981395162348  
38.8495095797881 36.0741672064298 35.2880714952489 34.266241549578  
32.7800533388945

LOC648794 39.5676051939342 38.8336427948187 46.1653991089885  
36.6501141438378 41.0885562160946 43.1826328292558 39.6535880152834  
43.5544347011646 44.1519466943185 41.4397539024976 41.0050831223107  
37.5556299264699

LOC648795 42.5193208629123 40.3384318592985 38.2280071951674  
34.9221408381038 40.6723334103791 42.9695585740813 41.9393838138203  
40.6171774724171 42.6366765186182 39.5637454855233 43.4709415392696  
38.745552403895

LOC648796 41.7397731376692 39.8695929627783 39.6451483836089  
40.9607305725196 41.3755760434934 42.357910063876 41.3594868055879  
42.157627240486 41.863927676552 41.4397539024976 40.723990462047  
40.1700117452801

LOC648801 39.5676051939342 39.9697332660833 40.301483914446  
35.1451084093692 40.9950639693255 43.9724628401189 40.7910160811527  
36.2539950294089 34.5633623842083 38.957687788868 42.5426057453993  
40.2669497398702

LOC648803 41.5421429082231 40.6380495994768 40.4882741869718  
47.3574589211166 40.5710637884029 43.0860383229288 47.8947595316832  
40.5158867964016 36.3649677956953 43.6033221838149 35.3362091871364  
44.9070250604284

LOC648814 55.9249770393176 46.5650556481721 42.157627240486  
36.264823544143 51.6869155634183 42.357910063876 54.0170817319522  
86.7710020879725 65.644767142472 50.1649089793069 47.7535797917441  
49.4786466722535

LOC648815 39.8662795144616 39.3999056968598 34.806104801006  
34.6468794865286 36.2048942610546 39.2985791324641 41.4742337714895  
40.7311497914871 41.2870505273664 39.1621898366355 38.3684202018524  
45.6692241948108

LOC648816 39.1590964332473 41.554942319225 43.6670755115848  
50.8567345921473 39.5595233162192 42.2577689927563 38.8417151851134  
38.956280281655 38.7298222155532 44.3648993568405 39.7342718293432  
45.1735152121056

LOC648823 41.4508241771315 38.5252456306656 40.4070046183108  
37.8442841690502 35.9894133432376 34.9849896310235 43.0930293831497  
38.5457716679071 37.3600014814388 36.4651112441576 37.3687900733549  
36.3454320848591

LOC648827 47.1962846565261 43.5873188565519 44.3344900481112  
56.4578213622965 42.4864576619427 44.5544727111028 44.4639405506967



41.5464765641928 40.4220196471124 46.0119912782855 46.6442692119997  
42.8864415494484  
LOC648829 39.6609238036815 41.0678614026819 45.6989664108554  
41.1886975241176 39.9697332660833 43.3785777889265 41.5817737564592  
41.1575777497576 38.9006788676407 45.5776159432079 43.5710871617107  
40.8681871019812  
LOC648830 41.8409927585705 40.6380495994768 44.3344900481112  
39.066284740632 44.9936360641969 37.2686490268265 36.8369172900902  
36.2539950294089 34.9428206949566 35.8304004211528 37.8372168909583  
35.0222940937513  
LOC648834 43.0001432913058 40.716553247236 33.281531405287  
34.9221408381038 40.3452320167286 42.750861693377 40.0052661202207  
43.1567024035183 44.8997235283254 34.7308008643142 39.8184668132023  
35.6427313468066  
LOC648840 55.0078788655089 33.0553208959996 36.4564050256915  
39.6292788039793 32.2133093774284 33.3470732872681 42.7431359850339  
37.5511560880902 41.7627910693483 38.4187686307607 39.7342718293432  
36.5474283500601  
LOC648841 46.263826584899 49.9085372049438 46.3411353377615  
45.334106390212 40.2449343247539 40.9506062495231 47.7390230243778  
45.9604707098953 42.4540072551568 43.7303813515864 42.8263096141654  
46.2625470410195  
LOC648846 45.3872406432794 44.2630383225933 45.063792968927  
41.8778873678551 45.3675390992851 45.9266745571724 49.8281348927244  
48.87875862356 46.0106098064475 48.4890615340603 47.8988096575648  
42.7782216342806  
LOC648851 36.8072833828297 35.9305494063137 41.8751578329365  
36.1562979552173 38.0598374201407 35.314469458379 38.1793598983615  
41.6466169548846 37.0126425326534 36.4651112441576 37.2892641289258  
35.0222940937513  
LOC648852 616.912306849151 363.947777340854 462.105603187328  
563.750309421406 242.396401163598 251.65044168003 428.729935028911  
1343.66876893729 249.822387177805 833.136660528149 920.504890206997  
609.0653198086  
LOC648855 42.8036731479932 42.5269793679335 37.7384958256497  
38.9534635879195 48.9627346956003 38.8336427948187 48.4859552186772  
41.2551966132486 43.3744503319109 42.1622837416589 44.3763859390287  
37.9607839934735  
LOC648859 44.436995101921 42.4493032770053 42.8270038153139  
40.646702696033 42.6022652963326 39.3841861812262 37.4772922422734  
39.3709357615493 42.9020321355927 38.8507804383261 43.3085358214154  
45.1735152121056  
LOC648863 42.2455707947223 40.9731067463382 44.9758339877851  
41.4273122914951 38.8456942580061 44.2607789091176 38.6243997507646  
51.9447450229707 40.9901805728485 41.9666541498638 43.1931731665131  
38.8495095797881  
LOC648868 43.844855336215 39.0102066700839 39.991353369336  
41.1886975241176 38.2496050953547 38.1169703906207 41.9393838138203  
42.0494116081998 37.7384958256497 40.8970401536578 37.6484782516569  
40.1700117452801  
LOC648874 46.0023068797812 36.6002100641539 44.7829632472754  
43.9282059368202 41.467005949568 41.9543948167375 44.2166118829877  
44.4031868028216 44.4395580493118 43.2988017098387 39.4410515050885  
42.8864415494484

LOC648876 37.8386378737561 45.7317208802318 37.7384958256497  
46.1673159982664 39.5595233162192 42.8598805316863 37.4772922422734  
37.33030683349 34.8552366193358 33.9967481174035 39.8184668132023  
37.5556299264699  
LOC648878 42.442231667357 36.5219488315447 47.9035532886869  
39.2780515621926 41.467005949568 38.8336427948187 44.8643898647322  
36.43924066428 46.6944238390932 42.0621425894624 42.0750889188255  
43.8575940017119  
LOC648879 41.8409927585705 42.9358255168086 46.8267540220952  
38.745552403895 41.467005949568 42.750861693377 37.1643693306382  
42.2577689927563 45.0997987980157 37.5343260962758 40.723990462047  
42.7782216342806  
LOC648894 41.1523487516364 39.3999056968598 38.1421709520616  
37.8442841690502 38.5512429290626 42.157627240486 39.6535880152834  
34.9580369221164 32.1218888714537 36.2435874904689 41.3553369544097  
40.2669497398702  
LOC648897 44.1294459089314 38.6414316877471 41.0356368374708  
41.8778873678551 40.9950639693255 54.4753345912615 49.540449125788  
42.7431359850339 37.5469247328848 35.2880714952489 35.7953070087288  
38.6454098044474  
LOC648898 39.4710743516517 41.3610369241157 37.6356984043643  
39.4469765850607 37.1869730989923 38.0577366178816 40.6130792100165  
41.5817737564592 40.8351751854504 38.957687788868 42.170702295259  
39.8497227447888  
LOC648900 41.5421429082231 43.2649781354792 43.0016969050339  
45.7397504535169 43.4544762830742 38.3418933808844 44.3440839686558  
42.7431359850339 47.0804681460898 40.8049408996274 41.0050831223107  
40.0557788909923  
LOC648905 33.6902293666089 37.10170285405 38.3166554965434  
38.0958223740111 44.7829632472754 39.7394181011603 41.4742337714895  
42.4580504587581 46.581796165231 44.2580151149956 44.4688999098904  
44.4475838947656  
LOC648907 56.6086202928268 53.5281825103894 63.1450855271137  
64.0903425729408 60.2276476399612 56.2229687620557 58.1591117988945  
57.50915811428 43.1180113655693 56.1912096308988 55.854474649572  
54.9169289331775  
LOC648926 49.4151347850687 43.5873188565519 48.9944486068347  
42.1273928203021 46.4343327861696 47.7556758818053 50.0088611244948  
51.8347877274018 45.2897806651929 42.1622837416589 46.6442692119997  
47.7962548556026  
LOC648931 45.0985088502363 41.4508241771315 40.1985790927248  
47.3574589211166 49.0828761839116 41.3553369544097 41.8315602975157  
42.9301944191913 45.2897806651929 39.4710743516517 42.8263096141654  
38.2350720635382  
LOC648934 43.5710871617107 45.8669209716694 51.3268475761593  
48.1662933382789 51.7983110178095 41.3553369544097 45.6042625176633  
45.1714698794331 49.2879849674517 39.3698811593364 44.9713479185144  
42.7782216342806  
LOC648943 42.8036731479932 41.7337506166619 43.8495248991589  
42.357910063876 40.148780650831 37.7000400506818 42.1607322031054  
41.5464765641928 38.9834959368496 43.1839109702714 41.0050831223107  
43.0930293831497  
LOC648955 42.5193208629123 45.0115870036541 44.1452943804044  
51.0175677516029 35.9058393060637 41.4508241771315 48.3411413510851

42.5435283762933 42.0621425894624 52.8928296360463 44.9713479185144  
40.8681871019812  
LOC648963 39.8662795144616 41.9894412416874 46.8267540220952  
37.1894304543751 43.3332476888305 40.8634043028528 40.6750540874299  
42.7431359850339 43.2761454096265 43.401782064778 39.3667161654772  
40.3691324547049  
LOC648966 44.9896851005259 39.0102066700839 40.5734458834617  
43.9282059368202 46.4343327861696 44.5544727111028 35.6056062164318  
49.9332280449549 46.3203995372658 33.4316681623175 42.0750889188255  
41.0657892043496  
LOC648972 40.4639532172338 44.5884811528117 45.5883690965192  
45.5869891570251 42.9090346219023 45.1873487463472 48.0283573444179  
38.745552403895 40.8970401536578 41.8613406887824 46.7386599624801  
41.863927676552  
LOC648974 46.263826584899 46.4385386401326 47.0940613507321  
43.4410741327254 46.8674366115656 44.5544727111028 43.1931731665131  
46.0633179231318 48.8067321016961 48.7414853386615 42.5426057453993  
45.3763275588341  
LOC648976 45.2875173643252 44.3529919625344 45.1569741609597  
48.1662933382789 43.5544347011646 41.554942319225 46.4388841354122  
46.695848687694 39.1790517315259 43.7303813515864 38.1835938174625  
40.1700117452801  
LOC648979 42.2455707947223 39.5050383901884 46.0727230219512  
44.9370339275041 47.5647821785529 45.0882356578404 45.6042625176633  
43.0390857698452 42.6366765186182 46.0119912782855 46.8954576545929  
43.2776458914333  
LOC648981 37.55264801907 36.4002279956519 35.7105247506212  
37.29566077996 36.9060997041453 36.3845892764084 40.5585676679482  
38.6454098044474 40.4220196471124 39.6719190054379 41.1638563416981  
47.2131144508464  
LOC648982 47.2862299990938 42.7775752471711 40.0998167098057  
40.3180310664156 43.844855336215 40.650742261428 41.8315602975157  
43.9366081640576 40.7847110517594 43.9450023643394 42.911855821602  
47.3172462673426  
LOC648984 54.691568065544 84.7222416138393 72.4202724008052  
165.606015336587 67.6011992144113 76.331185787832 54.0170817319522  
62.6386437936516 51.2776048338 62.1035858593388 58.5588286084726  
56.5225014032155  
LOC648987 36.6480005877129 37.4540772310118 35.7105247506212  
38.745552403895 37.6527901109005 43.2805590023412 45.3597029614942  
39.6474008369935 35.860430241131 36.5806287103157 37.6484782516569  
36.9976231206067  
LOC648993 37.0320432433314 34.2618170189676 40.1985790927248  
34.1051821768421 35.4484652445078 46.574682061365 35.9058393060637  
39.9576138799997 42.7150227340364 38.528621456378 37.4642807402741  
35.2448979801094  
LOC648997 35.3227485563945 36.2103905554984 31.1853651446075  
36.9912468186322 37.3508690072156 41.9543948167375 33.5578650644246  
33.9687743313429 35.1155486926999 34.8137085420423 43.0016969050339  
44.7401523707775  
LOC648998 40.3478825593224 42.5269793679335 44.2405728317107  
43.8002456102021 43.6587492470348 43.7630587657205 46.0228732507872  
46.3685439301234 43.8482802038826 34.1648535095605 46.7386599624801  
41.5536168238478

LOC648999 32.821392987958 38.6414316877471 37.9482157381008  
32.0298369224145 35.9058393060637 37.2686490268265 40.2154497375715  
36.9355798143571 33.0463640202858 35.7202909649682 41.3553369544097  
42.57175366709  
LOC649009 40.9558083259517 43.7396619462033 42.59352468383  
40.4893720023062 43.5544347011646 44.3648993568405 44.7915315085948  
41.2551966132486 39.7537274655115 41.2276963324981 41.1638563416981  
41.8982199176791  
LOC649021 40.5654775358427 39.1982470626863 36.2683886571585  
34.9221408381038 34.9062568194127 38.6414316877471 32.7676164492555  
42.2577689927563 31.7734183346363 38.2069499294002 45.7328341667151  
35.7451401627836  
LOC649023 39.6609238036815 50.3586212130973 41.1367478979484  
35.6928955245309 46.4343327861696 40.650742261428 39.5496902678788  
36.8400213077707 38.0213051227859 34.064698871541 41.3553369544097  
41.0657892043496  
LOC649025 79.8844295847317 43.7644428186265 48.8100349749783  
72.2577390063259 53.1884505015411 52.0299937917925 40.3302268293707  
48.4670130605028 40.2274522635576 56.685925255591 52.4393177875001  
49.7336769474446  
LOC649030 46.441301934328 46.8236022402545 48.8100349749783  
53.8086134112366 50.0580547772867 43.9724628401189 48.1747307200218  
40.047314525032 44.8997235283254 43.6033221838149 45.2265319826548  
46.1592873342534  
LOC649037 34.8099089553046 60.5571721986885 36.2683886571585  
35.0448343468967 37.5556299264699 36.8059561571675 37.1643693306382  
35.1738399826814 37.2810767789306 33.5412189543102 33.5370783156523  
37.6557714476853  
LOC649041 38.5007204246293 39.5050383901884 39.9101908547397  
39.3750969348308 38.1644569189523 39.0266821712099 35.7055410599146  
38.5457716679071 38.7298222155532 40.8970401536578 37.0180934800573  
37.8490162439785  
LOC649044 46.8626801744519 43.683792219729 43.4709415392696  
44.2222841572272 42.7982502551634 39.0266821712099 45.9426591985894  
48.272324215504 42.5406888281114 43.7303813515864 44.9713479185144  
40.3330033416496  
LOC649049 1455.64106630257 3043.12489526581 1910.5347560855  
1457.72260892651 3329.68037676265 3124.84336032646 2689.80835574654  
1509.04753111016 4299.4451139256 2201.39729904166 2365.73772015255  
2733.80542760533  
LOC649057 40.7609952437622 44.2105195734073 45.6989664108554  
43.1847628331565 39.2608760193011 45.3882138838137 41.0381860307445  
43.1567024035183 40.137818555383 39.2623423164488 39.6403089864678  
39.0536056496869  
LOC649060 43.5710871617107 44.6918600441328 45.4865173433646  
44.4367387274922 40.8873907150245 43.1826328292558 41.9393838138203  
41.9315419791594 43.9450023643394 37.6383530120621 36.5359455830388  
42.6758568421347  
LOC649063 35.3227485563945 42.7775752471711 43.7630587657205  
42.8235313007746 44.4489662507893 43.4681646416585 40.6750540874299  
41.1575777497576 38.8271346375425 37.6383530120621 40.547835538778  
39.1553169409075  
LOC649067 40.5654775358427 38.5252456306656 41.2365089689635  
43.9282059368202 39.7568367479301 41.159706131351 45.4799270968969

40.931294690669 40.8970401536578 40.2112371512838 38.745552403895  
36.3454320848591  
LOC649071 43.5710871617107 44.9370339275041 40.301483914446  
38.0958223740111 41.7929491793697 39.0266821712099 36.8369172900902  
43.844855336215 41.7627910693483 38.957687788868 42.0750889188255  
43.9541718254769  
LOC649073 44.9896851005259 41.554942319225 43.5710871617107  
42.2496337895968 40.7779767565889 42.750861693377 40.6750540874299  
42.0494116081998 40.3316153483289 37.8217989841918 43.3085358214154  
36.6603338274678  
LOC649075 39.266565827316 43.683792219729 44.7829632472754  
44.6905691366696 43.3332476888305 42.9695585740813 47.4439407315335  
39.0620487644635 45.9227107476843 40.4136535208406 43.9450023643394  
44.7401523707775  
LOC649086 42.3433931248155 50.4022543872993 45.7968648044613  
49.7350276169552 52.2089306840125 43.1826328292558 42.629412460409  
40.047314525032 49.3780606970538 42.8936990772838 41.9908237694988  
44.6484005362281  
LOC649088 42.2455707947223 36.2103905554984 45.989212296035  
42.2496337895968 40.6723334103791 38.9378717994178 44.4639405506967  
41.6466169548846 41.074824727477 43.0919221375514 41.4508241771315  
39.9519547348106  
LOC649091 46.3390850717989 44.7829632472754 43.5710871617107  
44.1483976313959 42.9090346219023 45.1873487463472 42.0605906240248  
49.3880946790306 43.7630587657205 39.3698811593364 43.4709415392696  
40.4639532172338  
LOC649092 41.7397731376692 44.0409178714232 39.7411455670172  
41.6564075217517 34.9062568194127 42.157627240486 39.1539892144371  
35.2642250366721 40.5912213523345 40.1179210534118 43.9450023643394  
46.1592873342534  
LOC649094 41.1090481599939 40.8503192605024 44.1976966800856  
42.3908047744487 38.8456942580061 38.1644569189523 42.629412460409  
41.294200401933 40.3566407936735 41.2747736315207 38.4304896304026  
40.9243125941198  
LOC649095 77.0301627655229 49.4982025424177 42.4580504587581  
46.4555908533915 63.3638417360105 64.5187138759372 46.4388841354122  
46.8954576545929 43.5669306063196 38.8507804383261 48.3847843498476  
41.3481355128089  
LOC649101 40.2543341073001 40.7952353240579 39.1799070031819  
43.074472921841 42.7107928951766 43.7630587657205 46.1634822993009  
43.844855336215 40.0403898620771 36.4651112441576 43.5710871617107  
39.1553169409075  
LOC649103 36.3649677956953 35.2143190355414 35.5220586859301  
37.8442841690502 40.0599807618105 38.7340969861754 45.3597029614942  
40.2382908228517 38.3418933808844 34.5718473203083 34.064698871541  
38.745552403895  
LOC649107 49.540449125788 41.2598458726002 37.9482157381008  
43.5627649099623 42.6022652963326 47.3791873993182 43.9450023643394  
40.831207953647 45.8325181856483 44.4652605017595 44.7114813656401  
45.6692241948108  
LOC649112 35.7012997405508 40.4359177791566 35.2838283525874  
39.6292788039793 37.956732373465 40.1428591998404 38.4005795891396  
43.0390857698452 37.3600014814388 35.0668743708816 41.7272875295469  
41.2437378488025

LOC649120 39.6609238036815 36.1232327599945 42.5406888281114  
36.6501141438378 38.1644569189523 36.1190722948669 35.6056062164318  
38.079222289614 41.4636047919453 39.2623423164488 38.5668610487033  
40.1700117452801

LOC649125 45.8108990837624 44.0409178714232 42.8270038153139  
42.9358255168086 46.5557478175976 48.6621527194963 48.1747307200218  
44.293922970134 39.1790517315259 42.9866214102525 41.0808257270221  
43.9541718254769

LOC649128 38.8561375693335 41.9894412416874 37.5597671487621  
39.7411455670172 40.0599807618105 35.9305494063137 40.0052661202207  
39.853866204927 34.4716904283753 40.7063426028871 39.9899430628542  
46.3411353377615

LOC649133 37.1485601150873 42.0709558258414 40.6737160001291  
40.3180310664156 44.0451487108213 42.357910063876 41.253645578517  
41.2551966132486 41.4636047919453 41.4397539024976 40.4504608195666  
40.4639532172338

LOC649136 44.3355304829989 43.8495248991589 42.640829914102  
43.1847628331565 45.1137938810047 40.3357777530419 41.8315602975157  
43.4544762830742 43.5669306063196 41.8613406887824 41.5421429082231  
43.9541718254769

LOC649137 40.6559419616644 40.0527893189096 36.6522278218553  
38.8495095797881 39.5595233162192 42.2577689927563 43.6753843488695  
43.2551508830106 42.1594905198929 40.1179210534118 40.8225507267584  
41.4508241771315

LOC649139 43.2724556187214 44.5152708955623 47.2962360458401  
44.9370339275041 42.7982502551634 51.3886035574416 39.8695929627783  
41.6466169548846 43.8482802038826 46.441301934328 43.9450023643394  
43.9541718254769

LOC649143 42.2651653674882 203.586637054746 227.317566600324  
483.20917825594 78.9088042058577 127.547251770359 144.37233706688  
52.7787010032051 41.1367478979484 59.2035499250243 53.9517841438975  
61.18889498318

LOC649144 44.6231541342 41.8073910693411 43.1931731665131  
48.665578118898 42.1650127805175 43.7630587657205 49.6872467499977  
46.1673159982664 44.7058233759912 44.6918600441328 45.8180710486329  
43.0930293831497

LOC649150 4784.36905964712 6749.14636741447 7127.13565491501  
4550.56817942699 4216.69417265779 8937.3846214861 3361.67247904403  
3296.66056024983 4597.60989502097 4048.33132153903 4632.08655821299  
8441.71894028273

LOC649151 39.266565827316 40.8880530359822 36.2683886571585  
39.7411455670172 37.956732373465 41.554942319225 37.830876898596  
40.1474543172332 42.7150227340364 42.5664883002833 44.6286581923295  
42.2577689927563

LOC649159 48.5835484742456 39.2907645923217 39.5118967430322  
39.1335009052403 35.3930760356466 44.3187284857534 37.9430145836712  
41.9820792173615 35.0033376705042 40.4518431978241 36.9768361759916  
40.7704587752083

LOC649160 40.4639532172338 45.9266745571724 44.9758339877851  
49.5424425850549 38.9496515344837 41.554942319225 44.0687697278114  
46.695848687694 45.8325181856483 45.7911932481722 40.547835538778  
43.8575940017119

LOC649162 42.442231667357 40.148780650831 40.5734458834617  
42.9358255168086 49.1928206164702 39.132725377815 46.5650556481721

45.3872406432794 41.9635525160083 38.1042454705119 40.547835538778  
39.7411455670172  
LOC649167 42.5193208629123 36.4002279956519 43.0971787292711  
41.0726336841311 41.3755760434934 42.750861693377 42.2577689927563  
40.4359177791566 41.7627910693483 42.6793753550854 35.046946054314  
44.4475838947656  
LOC649169 43.0001432913058 42.6939394537076 46.0727230219512  
39.9697332660833 47.5647821785529 43.5752393599169 53.1884505015411  
46.7980335276155 56.5094373275922 44.7958122466628 43.0971787292711  
47.2131144508464  
LOC649174 44.5282181324797 38.3322849790657 32.821392987958  
39.5050383901884 42.1650127805175 39.6251842352088 42.1607322031054  
40.6171774724171 39.4762546236449 36.5806287103157 40.2649309204478  
40.7704587752083  
LOC649179 44.1737502492846 41.690833180291 40.931294690669  
44.0991023527481 44.147557390293 42.808889470973 41.4369824439795  
43.7396619462033 38.2874316439311 42.6793753550854 40.3180310664156  
39.4490233720848  
LOC649181 40.4639532172338 43.5873188565519 42.8270038153139  
42.6913548400127 37.7576900881741 38.3418933808844 47.4439407315335  
45.5581356216957 44.7058233759912 45.7911932481722 40.8225507267584  
40.4639532172338  
LOC649182 40.3478825593224 48.275452803061 41.528370959196  
44.4367387274922 35.0181575202066 43.0860383229288 42.4939802311136  
42.157627240486 38.2215591930186 44.1379638573455 45.9104478407175  
36.5474283500601  
LOC649184 40.5654775358427 39.7835513496873 43.7630587657205  
46.8954576545929 42.3685136297603 41.7627910693483 39.6535880152834  
46.2779564481158 42.9020321355927 45.7911932481722 40.1742127891824  
44.7401523707775  
LOC649185 43.7585538437696 37.8217989841918 52.3432130135266  
40.1804147506786 46.3150221024046 41.4508241771315 47.5963750520409  
41.9315419791594 41.2870505273664 40.7063426028871 46.0905079010237  
38.6454098044474  
LOC649186 47.2862299990938 45.2556760873335 47.646800205189  
38.5252456306656 50.5110359971301 43.8582747295766 44.0687697278114  
45.7476095696859 45.3756389170606 46.8954576545929 50.3876754565799  
47.6040671292013  
LOC649189 51.6558970571712 42.4493032770053 43.0971787292711  
47.9915414951747 54.1225249245036 46.3715909653832 49.3854238365325  
45.2806199505029 41.2870505273664 48.6124127998952 46.3370338074996  
45.2783024981315  
LOC649191 35.9305494063137 36.3110701990588 36.4564050256915  
33.5578650644246 36.9702228618069 41.8613406887824 42.7431359850339  
33.9687743313429 41.4636047919453 37.920964499903 37.9230440150891  
36.8690774823319  
LOC649192 52.8427643366617 36.9994058279362 38.4043916290561  
46.8954576545929 50.3713170502557 42.750861693377 45.6042625176633  
46.3685439301234 43.5669306063196 51.9547984751408 49.8393069675192  
46.917149434588  
LOC649198 40.8681871019812 41.8848959280916 40.8846826807717  
47.3574589211166 38.3085139808968 40.3357777530419 37.830876898596  
39.2672712041774 40.8420925848403 44.571915452417 37.7963032976457  
42.1860813954352

LOC649199 42.5193208629123 38.2263227947189 43.1931731665131  
42.9358255168086 39.9697332660833 38.1169703906207 39.4600924554505  
36.0306975524309 40.5912213523345 36.2435874904689 35.4386677371439  
38.1421709520616  
LOC649200 39.8662795144616 45.1694246393676 41.6079958749402  
43.4410741327254 45.2556760873335 36.2015763253919 46.3057385979341  
42.6450179841129 45.4799270968969 45.9004543328976 38.3684202018524  
40.3691324547049  
LOC649201 37.1485601150873 35.9305494063137 37.4642807402741  
38.3166554965434 35.9894133432376 32.9046688061235 37.1643693306382  
39.853866204927 39.5806465938526 37.920964499903 36.2435874904689  
39.7411455670172  
LOC649203 40.6559419616644 42.0709558258414 40.301483914446  
40.5484717678957 41.9842695818285 44.9896851005259 45.3597029614942  
44.2159020605784 42.0621425894624 44.6918600441328 44.6286581923295  
44.3521099857368  
LOC649209 47.0940613507321 37.3634897565502 46.6588655218735  
39.9697332660833 59.5844022026141 55.1037284831588 46.1634822993009  
47.2009420656854 49.7336769474446 43.9450023643394 43.5710871617107  
54.1941919612524  
LOC649210 46.6348258763289 46.4861258030402 43.9450023643394  
117.539037885384 42.7107928951766 49.4157684139858 44.6032218589199  
57.3286965007828 55.0748878261048 44.6918600441328 48.2910530887214  
50.1579724208315  
LOC649212 34.2180669723984 43.9421822132391 40.5734458834617  
41.1886975241176 42.0709558258414 43.3785777889265 37.1643693306382  
35.5798430594271 37.10170285405 36.6893251782922 40.8225507267584  
40.0557788909923  
LOC649214 41.4508241771315 43.5627649099623 39.3709357615493  
40.2455972565968 38.2496050953547 40.7063426028871 41.8315602975157  
40.3691324547049 43.7078399718247 40.6022003765153 41.8168470823451  
39.0536056496869  
LOC649217 44.2350046179299 39.5050383901884 40.5734458834617  
36.264823544143 34.3633615460307 38.7340969861754 41.8315602975157  
35.4526946152955 41.1742244762318 39.6719190054379 39.8184668132023  
45.9693232070002  
LOC649227 46.7293238583888 43.2649781354792 47.2962360458401  
47.3574589211166 46.9906120932727 44.0804700754786 55.4004611309636  
48.87875862356 44.619512785899 45.2556760873335 44.2142581488029  
47.6040671292013  
LOC649238 34.2180669723984 38.7344853699576 39.5450079747895  
33.3231576795423 34.7018263647985 40.650742261428 42.357910063876  
37.4484310268909 37.9273653326866 38.957687788868 39.153226699662  
38.745552403895  
LOC649242 49.085741080241 48.9899488302637 43.5710871617107  
49.3654837541353 54.5683518971261 52.8421046802739 50.5252048155459  
50.7364620410977 49.9951674107458 48.8623729374733 45.5707650534259  
45.3763275588341  
LOC649246 42.6036491382658 48.0296332183129 42.7303139017786  
43.3078542962968 43.5544347011646 45.7300501624017 42.0605906240248  
44.4031868028216 46.7760357462635 43.6033221838149 45.7328341667151  
42.7782216342806  
LOC649248 44.6231541342 39.3999056968598 47.0940613507321  
41.7614975630362 42.7982502551634 43.8582747295766 41.253645578517



46.5717043290731 42.1594905198929 35.6208308220005 44.6286581923295  
42.6758568421347  
LOC649255 37.8386378737561 41.554942319225 37.8386378737561  
42.0102671859606 38.4540849632254 38.6414316877471 37.3799542961839  
36.6452480995946 35.7973685350741 36.8059561571675 42.5426057453993  
35.6427313468066  
LOC649260 43.2724556187214 54.1773909134233 55.094385444315  
66.5921967967793 48.9627346956003 48.9826868640753 49.3854238365325  
46.3685439301234 47.0804681460898 48.4890615340603 45.8180710486329  
52.8455400026194  
LOC649264 38.8561375693335 39.3999056968598 41.3366779545815  
37.29566077996 34.806104801006 39.0266821712099 36.9355798143571  
38.079222289614 36.6312676076142 41.9666541498638 36.9060997041453  
37.6557714476853  
LOC649270 46.3940502929193 47.3861758958576 48.0191002461099  
46.0228732507872 46.2448677480802 43.5752393599169 44.797320243931  
47.4740726032707 53.8014179632737 50.3046848382005 49.6327203346749  
55.3563533836982  
LOC649276 44.5282181324797 45.3486182278177 41.528370959196  
42.2496337895968 50.0580547772867 41.8613406887824 45.7452456977857  
42.357910063876 49.4786466722535 38.0078357808393 34.7308008643142  
47.7962548556026  
LOC649279 43.6706764143908 43.7644428186265 44.3344900481112  
43.074472921841 38.6454098044474 38.2293008890613 45.8980298854198  
44.6107027295193 37.9273653326866 37.6383530120621 41.0050831223107  
45.5800840647989  
LOC649280 39.5676051939342 39.5050383901884 38.3166554965434  
40.0698728584484 36.9702228618069 44.1737502492846 44.7255207589606  
44.2159020605784 41.4636047919453 42.4594149893798 43.4709415392696  
38.8495095797881  
LOC649282 47.7267190613906 37.10170285405 40.1985790927248  
42.4580504587581 48.5000946421718 40.1428591998404 44.2166118829877  
42.5435283762933 45.6582729799009 43.9450023643394 39.6403089864678  
39.3575468494941  
LOC649292 39.5676051939342 45.3486182278177 45.6989664108554  
41.5464765641928 41.3755760434934 44.6524308640784 39.7576136507593  
42.5435283762933 37.8319142847141 49.4006068471301 49.7363778831003  
41.6550823405646  
LOC649293 39.6609238036815 29.2731027042641 35.8265993915844  
33.6816578730693 35.7973685350741 41.3553369544097 46.7100796279384  
38.3684202018524 40.0403898620771 41.7405682794166 46.824299585607  
32.4951076826876  
LOC649296 40.7609952437622 43.2649781354792 45.1569741609597  
41.7614975630362 42.3685136297603 38.8336427948187 38.4005795891396  
49.085741080241 42.992884918158 42.4594149893798 45.390192977585  
47.8931773060789  
LOC649305 43.0930293831497 42.1607322031054 39.991353369336  
44.9370339275041 41.0885562160946 42.750861693377 41.0381860307445  
48.87875862356 35.6970528713709 36.2435874904689 39.9899430628542  
43.0930293831497  
LOC649313 44.2350046179299 39.2907645923217 43.0971787292711  
39.9697332660833 43.1252272136667 42.0574848021044 45.1017494688414  
36.8400213077707 35.6970528713709 42.5664883002833 41.4508241771315  
39.3575468494941

LOC649317 43.4626049853157 36.6968906669565 44.6032218589199  
39.7411455670172 42.6022652963326 35.9305494063137 40.4359177791566  
38.956280281655 36.7267557061938 43.1839109702714 38.079222289614  
37.0953622406687  
LOC649318 39.9697332660833 38.8336427948187 42.3536549114165  
42.0102671859606 40.8873907150245 44.7804080899431 43.4544762830742  
39.7509165247419 43.4656637536244 41.8613406887824 40.547835538778  
38.6454098044474  
LOC649320 40.4639532172338 41.3610369241157 42.9104454767916  
41.4273122914951 41.9842695818285 40.5281496800812 40.5585676679482  
37.1317006162938 45.0997987980157 44.7958122466628 42.357910063876  
41.4508241771315  
LOC649324 42.2455707947223 40.4359177791566 40.4070046183108  
39.5050383901884 40.4639532172338 40.3357777530419 41.3594868055879  
41.6466169548846 42.2577689927563 40.2112371512838 38.3684202018524  
36.449101775775  
LOC649327 35.7012997405508 45.2556760873335 39.991353369336  
53.2046867327331 38.8456942580061 37.2686490268265 41.9393838138203  
40.6171774724171 42.357910063876 46.441301934328 41.7272875295469  
40.5703581862752  
LOC649337 43.4626049853157 42.6939394537076 39.3709357615493  
43.5627649099623 40.7779767565889 40.5281496800812 42.8684958525042  
44.797320243931 40.3316153483289 45.6868589181768 43.5710871617107  
31.036133494654  
LOC649340 46.263826584899 45.0905928998779 51.1347974668251  
48.665578118898 45.9104478407175 44.1737502492846 60.5125774827425  
48.3590401011623 43.9450023643394 54.4825201506931 41.8168470823451  
45.2783024981315  
LOC649341 45.1912496459517 39.6995529770239 41.3366779545815  
39.066284740632 38.9496515344837 43.6670755115848 41.8315602975157  
42.4580504587581 39.853866204927 39.8873706855774 38.3684202018524  
41.1554481567603  
LOC649350 44.7915315085948 40.9731067463382 47.0055981216687  
39.3750969348308 43.4544762830742 42.2577689927563 45.3597029614942  
42.9301944191913 42.1594905198929 43.6033221838149 41.3553369544097  
40.7704587752083  
LOC649351 44.0328992213727 46.0713306971594 39.5450079747895  
40.7481155008596 43.4544762830742 42.157627240486 47.7390230243778  
49.8344973836834 45.4799270968969 38.528621456378 43.401782064778  
43.1805016690297  
LOC649355 45.1912496459517 44.3529919625344 46.8267540220952  
46.614092935749 48.7288537840562 44.7804080899431 46.1634822993009  
46.9986083378817 39.5806465938526 42.1622837416589 38.956280281655  
49.5539622682049  
LOC649360 41.9407041937973 36.2103905554984 43.0016969050339  
37.7469621225553 34.0927410219282 39.8455060654531 34.1889222434768  
34.064698871541 41.1742244762318 30.6485078361448 34.266241549578  
31.372171135652  
LOC649362 40.7609952437622 48.4497719907777 51.9885249508283  
74.7732045170597 43.1252272136667 49.1013967533186 42.8684958525042  
40.7311497914871 50.6750785584772 42.6793753550854 38.4689132737495  
37.2810767789306  
LOC649365 41.1523487516364 42.6939394537076 41.9666541498638  
44.9370339275041 46.5557478175976 43.3785777889265 41.253645578517

40.1474543172332 40.9901805728485 48.2596564318071 41.0808257270221  
42.2577689927563  
LOC649366 51.2851682978581 59.6359245937831 56.1434024065079  
62.8201270538435 50.8875036861067 40.1428591998404 41.4742337714895  
40.5158867964016 40.8970401536578 42.1622837416589 43.1931731665131  
44.7401523707775  
LOC649371 42.1679276329916 39.4537536502114 41.0718387273629  
42.0621425894624 38.9919142475596 42.7107928951766 43.7540438144593  
42.6913548400127 42.0126083977597 38.4187686307607 44.3440839686558  
43.0322714179517  
LOC649374 48.0201377454632 43.5873188565519 39.991353369336  
44.550322123994 40.9950639693255 40.244271403831 47.5963750520409  
37.6557714476853 42.4540072551568 42.9866214102525 37.2018803984555  
41.7575097298927  
LOC649379 40.6559419616644 35.7393138893354 34.806104801006  
36.6501141438378 35.6434124419782 33.1602385985469 36.197424053556  
31.1733235029813 38.6322728994674 35.195364621675 35.6970528713709  
39.7411455670172  
LOC649383 43.3638918705225 46.2286164776607 45.8844325913247  
44.6905691366696 42.4864576619427 40.1428591998404 41.9393838138203  
41.7419877611072 42.0621425894624 38.4187686307607 43.0016969050339  
47.1060577218993  
LOC649385 40.9558083259517 42.6939394537076 37.2838080935695  
36.3604951341921 35.5220586859301 34.6977013306396 40.3302268293707  
39.0620487644635 35.9645119596869 38.528621456378 31.859589438824  
33.5578650644246  
LOC649389 44.9896851005259 40.6380495994768 47.3861758958576  
42.2496337895968 44.9936360641969 38.8336427948187 43.6753843488695  
43.2551508830106 44.5303781239209 37.920964499903 40.1742127891824  
42.1537476443423  
LOC649396 38.304249186058 39.3999056968598 44.8872784170036  
44.265834798964 38.6454098044474 38.4330755397458 40.4359177791566  
41.9315419791594 41.6616444147804 46.7646877499666 43.4709415392696  
44.5432192783161  
LOC649397 46.8141313516997 48.2220547806679 42.2577689927563  
55.4180794172794 46.6397391251762 48.9826868640753 43.1931731665131  
49.085741080241 47.7086093893038 52.8928296360463 45.2265319826548  
45.4799270968969  
LOC649404 40.4639532172338 36.89524015739 38.4043916290561  
40.1804147506786 44.4489662507893 33.7818132446042 34.6720534245631  
36.6452480995946 38.6322728994674 40.5090849993014 37.2892641289258  
40.8681871019812  
LOC649406 38.8561375693335 37.8217989841918 36.6522278218553  
36.6501141438378 33.5412189543102 37.5887129572848 46.0228732507872  
40.5158867964016 43.5669306063196 41.2276963324981 48.042366934301  
40.1700117452801  
LOC649407 38.7537364570873 39.7835513496873 41.8751578329365  
44.1483976313959 44.2607789091176 48.6621527194963 41.706879587091  
41.1575777497576 42.2577689927563 43.7303813515864 41.9083581529276  
41.7575097298927  
LOC649414 38.5648843914189 35.0222940937513 34.1806289878747  
36.9912468186322 34.1686574241133 36.4986986135769 41.1507980856436  
36.43924066428 36.3649677956953 38.1042454705119 34.9428206949566  
34.2141875904985

LOC649415 41.4508241771315 38.5252456306656 34.9849896310235  
41.6564075217517 44.3557408297309 42.750861693377 41.4742337714895  
41.0381860307445 41.6616444147804 43.4885245598939 41.5421429082231  
41.9430737035925  
LOC649416 44.7915315085948 44.3529919625344 44.0451487108213  
46.4555908533915 42.269054475455 40.244271403831 39.2533668167483  
43.0390857698452 42.2577689927563 41.3321861371202 44.9713479185144  
40.9683275553869  
LOC649417 43.3638918705225 42.6022652963326 46.5650556481721  
45.4634652319753 43.844855336215 48.0350549043063 47.8947595316832  
46.9986083378817 45.0017158586743 47.1001757441025 44.2142581488029  
41.1554481567603  
LOC649422 41.3387790895716 46.0023068797812 51.8122261766744  
56.9299697426319 48.5000946421718 58.1798515131249 50.5252048155459  
57.8765910878975 48.6494451061637 46.441301934328 55.0404566626821  
52.8455400026194  
LOC649425 42.9104454767916 39.7835513496873 45.989212296035  
42.5664883002833 47.8075998240396 43.2805590023412 44.7255207589606  
44.2159020605784 41.9635525160083 43.4885245598939 41.3553369544097  
44.4475838947656  
LOC649428 40.2543341073001 44.5152708955623 42.5406888281114  
36.4564050256915 35.5220586859301 34.7983399096627 36.8369172900902  
44.7044140979108 46.2027193115397 41.2276963324981 37.5583886316038  
37.6557714476853  
LOC649429 40.2543341073001 43.0227387991135 46.5650556481721  
35.314469458379 40.0599807618105 46.1513019317765 47.1345949868029  
40.3357777530419 46.0106098064475 33.2987269789328 40.547835538778  
43.1805016690297  
LOC649431 41.8409927585705 55.4635297192076 53.6837370963602  
54.1240583139871 44.6834648302383 38.7340969861754 50.3519150282938  
40.1474543172332 40.4220196471124 43.401782064778 44.3763859390287  
36.9976231206067  
LOC649432 41.2424637338424 40.148780650831 38.4043916290561  
39.6292788039793 38.8456942580061 46.7800033479223 42.629412460409  
40.047314525032 43.0930293831497 40.8970401536578 39.3667161654772  
37.1747156131306  
LOC649436 44.0328992213727 42.5269793679335 51.6159542017038  
44.550322123994 39.4693871570028 44.1737502492846 43.0930293831497  
35.9023742468744 36.6312676076142 38.6454098044474 42.6366765186182  
37.6557714476853  
LOC649442 45.8108990837624 35.4484652445078 41.6079958749402  
40.0698728584484 35.3327761997046 39.8455060654531 40.6750540874299  
38.956280281655 37.1820543575123 36.9102644736882 37.8372168909583  
39.7411455670172  
LOC649443 40.4639532172338 44.3529919625344 44.4311655729487  
42.6913548400127 37.8679241954337 43.2805590023412 44.2166118829877  
38.8495095797881 40.137818555383 45.1569741609597 42.911855821602  
40.6614700944853  
LOC649447 1537.76265834076 2196.59044510709 2318.50555842521  
1670.01014610464 3602.30252142918 2921.68921750799 2456.86796652313  
2071.90741263566 1914.9556343048 3361.67247904403 3399.75820494572  
2581.34849558524  
LOC649452 41.7397731376692 37.5469247328848 43.401782064778  
39.6292788039793 39.7568367479301 37.0180934800573 37.9430145836712

39.5466975353131 43.1805016690297 42.785429206422 37.8372168909583  
38.6454098044474  
LOC649455 38.304249186058 40.148780650831 44.7829632472754  
48.9944486068347 41.3755760434934 38.8336427948187 40.1235656101329  
44.797320243931 44.3440839686558 40.8970401536578 44.9713479185144  
43.2776458914333  
LOC649456 53.7507429765038 44.1239711172417 47.7737810047679  
50.0526763693329 39.7568367479301 45.2852528185486 44.9863726205428  
44.8997235283254 63.1091746640396 48.8623729374733 51.3103617600342  
46.3411353377615  
LOC649458 41.3387790895716 41.554942319225 42.9104454767916  
53.0284011078097 43.6587492470348 42.9695585740813 39.1539892144371  
41.1575777497576 40.8970401536578 44.571915452417 46.1673159982664  
38.4330755397458  
LOC649466 43.2724556187214 44.0409178714232 44.1452943804044  
42.1273928203021 45.6895223823001 47.5733603903505 40.3302268293707  
41.2551966132486 47.798305839406 41.7405682794166 46.4753015651202  
45.8546719310325  
LOC649469 44.3355304829989 45.1694246393676 47.646800205189  
47.6687908290818 40.2449343247539 43.3785777889265 46.1634822993009  
45.4757965005055 41.5635499110307 42.9866214102525 47.9942520395434  
48.0350549043063  
LOC649470 38.2083710281545 36.5219488315447 43.401782064778  
42.6913548400127 38.8456942580061 46.6872654833579 42.629412460409  
39.3709357615493 45.7452456977857 41.5435611403119 40.3452320167286  
41.7575097298927  
LOC649477 43.2724556187214 37.8217989841918 36.9795961564828  
40.4359177791566 31.4686555405126 37.9951997351435 36.08956004634  
34.2814697823693 38.3418933808844 37.0320432433314 31.9682164860619  
42.6758568421347  
LOC649486 43.4626049853157 37.3634897565502 44.0451487108213  
44.9370339275041 44.4489662507893 34.8956628705329 43.4544762830742  
35.5798430594271 39.3750969348308 40.5090849993014 40.1742127891824  
36.2582325396375  
LOC649493 42.442231667357 37.4540772310118 45.7968648044613  
46.7577982595088 48.6224651100733 42.4580504587581 49.6872467499977  
40.1474543172332 45.6582729799009 40.8049408996274 42.8263096141654  
43.6753843488695  
LOC649495 39.6609238036815 41.554942319225 34.806104801006  
38.5252456306656 44.3557408297309 42.9695585740813 41.706879587091  
35.2642250366721 40.137818555383 36.4651112441576 39.9899430628542  
36.9976231206067  
LOC649497 45.2875173643252 40.6380495994768 44.9758339877851  
40.7481155008596 41.3755760434934 43.5752393599169 43.9450023643394  
40.931294690669 171.021755568144 44.4652605017595 38.4689132737495  
40.2669497398702  
LOC649500 39.1590964332473 37.6383530120621 41.9666541498638  
46.7577982595088 44.3557408297309 44.4619248757502 36.9355798143571  
37.9837233601316 40.137818555383 45.4614234442527 41.1638563416981  
39.1553169409075  
LOC649501 41.8409927585705 39.3999056968598 41.437237454134  
47.481302504066 44.6834648302383 54.1440452292081 48.8319884367456  
44.1311654985682 40.8970401536578 47.3791873993182 46.6442692119997  
39.6352613956998

LOC649503 42.6036491382658 44.6918600441328 41.8751578329365  
45.8844325913247 41.467005949568 42.4580504587581 37.6036146841933  
39.6474008369935 42.357910063876 42.1622837416589 35.6041926503637  
46.8129509799753

LOC649504 39.6609238036815 42.9358255168086 39.991353369336  
39.6292788039793 43.9450023643394 41.3553369544097 38.0598374201407  
44.2159020605784 38.1169703906207 38.957687788868 41.0050831223107  
38.9496515344837

LOC649509 40.5654775358427 43.1805016690297 44.6032218589199  
41.6564075217517 40.9950639693255 44.7804080899431 46.8613212048981  
40.047314525032 47.9035532886869 48.9826868640753 38.8507804383261  
44.2527566343661

LOC649524 45.0985088502363 37.5469247328848 38.0452862258803  
37.651298468202 47.5647821785529 39.4953494583071 40.0052661202207  
38.2782436497441 39.5806465938526 44.4652605017595 44.0409178714232  
37.4554876386402

LOC649527 42.9641759692926 39.1982470626863 39.2707964550441  
39.9084621723809 39.2839132447749 41.2567470068038 38.2280071951674  
40.3357777530419 38.9496515344837 41.9666541498638 39.5399188536544  
41.3948836161924

LOC649540 39.1590964332473 41.7337506166619 39.7411455670172  
39.5050383901884 43.004943518025 42.4580504587581 42.0605906240248  
41.0381860307445 42.1594905198929 47.8207974930031 49.7363778831003  
40.4639532172338

LOC649542 46.441301934328 37.8217989841918 51.9214790114499  
43.3078542962968 39.7568367479301 43.8582747295766 41.253645578517  
40.7311497914871 45.1899271235974 40.5090849993014 43.7585538437696  
40.7704587752083

LOC649546 39.8662795144616 41.8848959280916 41.6079958749402  
38.2041059863839 38.3561682218911 40.3357777530419 44.4639405506967  
39.1652965788406 38.9834959368496 42.8936990772838 44.8872784170036  
42.9887069977696

LOC649548 3244.27810937143 4617.45430247751 3428.74022048394  
3217.83121827744 4948.93803183911 4569.48246031279 5525.13078364599  
6413.42384145372 3313.98659031004 4717.02689540013 3854.42494497831  
4898.89844391477

LOC649555 77.4999637278723 120.943323740458 113.454378667943  
105.376705821141 125.891602778425 117.408885431274 79.2701322339022  
85.9474373829081 147.689479458785 56.8201201798712 72.308304085263  
137.378222527303

LOC649557 39.8662795144616 40.4359177791566 44.4311655729487  
56.7927450229377 48.9627346956003 39.2985791324641 43.9450023643394  
40.3357777530419 48.0163377492228 46.325232414659 40.723990462047  
42.1537476443423

LOC649563 45.9090659324223 40.4772513262052 42.9104454767916  
40.3691324547049 43.5544347011646 41.3553369544097 43.4544762830742  
40.831207953647 44.3440839686558 41.8613406887824 41.9908237694988  
40.5703581862752

LOC649571 42.6036491382658 40.148780650831 50.3950981988762  
42.4580504587581 43.6587492470348 44.5544727111028 39.8695929627783  
46.4672637826582 42.6366765186182 45.5776159432079 43.0971787292711  
47.2131144508464

LOC649578 38.8561375693335 46.8954576545929 33.1559412791294  
46.0228732507872 41.9842695818285 40.040778349137 41.1507980856436

41.2551966132486 32.7294532998931 38.745552403895 41.3553369544097  
40.6614700944853  
LOC649580 51.6558970571712 48.3699741879723 54.2670850492947  
53.9517841438975 54.0126916508417 58.5530199658661 48.9826868640753  
53.6210959113222 46.581796165231 48.2596564318071 47.299647867533  
50.0571060701893  
LOC649583 45.9090659324223 40.148780650831 51.9885249508283  
49.5424425850549 43.1252272136667 43.9724628401189 41.0381860307445  
43.844855336215 35.3227485563945 39.5637454855233 44.8872784170036  
43.0930293831497  
LOC649584 41.9407041937973 49.6203214143464 51.223859150798  
42.0102671859606 122.316617618658 47.2927436772465 57.2758638871082  
48.9826868640753 52.7512110769042 49.9493230064613 41.9908237694988  
44.1452943804044  
LOC649587 42.7150227340364 40.9731067463382 42.4580504587581  
40.5484717678957 38.9496515344837 37.3799542961839 37.1643693306382  
43.1567024035183 39.3750969348308 38.0078357808393 43.0016969050339  
39.8497227447888  
LOC649593 44.436995101921 44.0409178714232 42.8270038153139  
40.0698728584484 43.9450023643394 43.5752393599169 40.5585676679482  
47.2864663693787 44.0519245668737 42.5664883002833 43.4709415392696  
45.3763275588341  
LOC649596 48.5835484742456 43.5873188565519 47.3861758958576  
56.4578213622965 62.046151104685 50.4022543872993 50.8388984085636  
49.9332280449549 51.8083208406279 51.9547984751408 44.2925355984056  
47.2131144508464  
LOC649604 48.5835484742456 44.3529919625344 48.0191002461099  
56.7927450229377 47.6884372645373 52.8421046802739 46.5650556481721  
43.5544347011646 50.8485682149772 43.9450023643394 44.1148826235374  
49.0655215909632  
LOC649613 61.1022920882065 55.8046062733709 47.9035532886869  
47.8164193292842 68.9038222450855 47.4699236780425 62.5506324864207  
64.8336014343435 60.164635768614 50.22432299342 44.7926323492519  
46.5650556481721  
LOC649616 40.7609952437622 37.7384958256497 36.9795961564828  
40.8681871019812 42.7107928951766 41.4508241771315 41.9393838138203  
40.6171774724171 41.5635499110307 45.4614234442527 45.310660704531  
41.4508241771315  
LOC649618 43.2724556187214 82.7351935657355 50.0748292497578  
49.1786207920603 46.4343327861696 49.7458652239071 44.4639405506967  
58.4200819624972 47.5564423692142 42.4594149893798 44.1148826235374  
50.379587451669  
LOC649620 43.7585538437696 43.1805016690297 48.2883694323339  
39.9697332660833 41.5668884168669 46.7800033479223 34.806104801006  
43.3262148375525 38.4344387289956 45.1569741609597 41.3553369544097  
46.1592873342534  
LOC649632 40.9558083259517 40.7952353240579 42.0621425894624  
36.1562979552173 39.5595233162192 39.2248354955045 42.4939802311136  
40.7311497914871 38.5252456306656 42.2614524730856 43.5710871617107  
42.2577689927563  
LOC649635 39.6609238036815 46.8236022402545 37.7384958256497  
37.9875302985336 40.4639532172338 43.0860383229288 38.6243997507646  
36.43924066428 41.5635499110307 42.2614524730856 36.7283081422707  
37.1747156131306

LOC649639 70.5096706089299 54.113533179847 81.382229980722  
58.9168466928565 66.8733921725051 55.401776072578 62.1970616836737  
54.3820590274321 53.1249776278067 84.8999904158793 86.8330533522204  
75.6428949408034

LOC649641 41.5421429082231 42.1607322031054 39.1799070031819  
35.49696651597 47.6884372645373 36.2768299545794 38.6243997507646  
41.0381860307445 37.9273653326866 42.4594149893798 43.5710871617107  
45.6692241948108

LOC649652 38.7537364570873 39.6123051184545 39.5450079747895  
39.066284740632 34.2638875325204 40.3357777530419 40.7910160811527  
38.1835938174625 47.0804681460898 40.6022003765153 38.5668610487033  
39.9519547348106

LOC649659 41.8409927585705 41.2598458726002 41.9666541498638  
47.9915414951747 44.7829632472754 44.7804080899431 39.6535880152834  
43.1567024035183 42.1594905198929 43.2988017098387 44.3763859390287  
40.8681871019812

LOC649661 64.4415447415281 52.7493349111555 61.1076362129586  
68.1992221684165 60.8550020364269 54.7083331985678 54.4934782594218  
70.8749669449099 59.6700171760426 70.7805103907761 59.4188882103773  
57.8111054584154

LOC649667 38.304249186058 33.4967065724734 37.1643693306382  
31.5391275257362 33.7494761745342 31.7413650507468 39.7576136507593  
36.9355798143571 31.6295801599123 38.3092241935352 38.1835938174625  
36.6603338274678

LOC649676 45.4799270968969 44.4411734611229 42.640829914102  
45.0798408927912 49.32293280121 41.159706131351 49.3854238365325  
38.6454098044474 41.9635525160083 41.4397539024976 44.7926323492519  
39.4490233720848

LOC649679 46.9343524312293 49.5443425465542 50.2869791217819  
39.9182914210537 49.1165251579197 43.5752393599169 58.8235742121172  
50.5734308316823 44.2222841572272 43.1447142498924 44.5136947552585  
44.3521099857368

LOC649680 42.9104454767916 44.6918600441328 47.2962360458401  
36.0481934423077 47.5647821785529 47.0027453663546 49.540449125788  
41.6466169548846 46.2027193115397 48.1392888470269 44.7114813656401  
49.3087627580849

LOC649683 44.7915315085948 42.1607322031054 39.0775870687758  
47.0874209746031 43.9450023643394 41.7627910693483 39.8695929627783  
42.357910063876 42.992884918158 35.93950183586 45.6348103033479  
43.4709415392696

LOC649686 44.0328992213727 41.7337506166619 47.9035532886869  
46.614092935749 41.5668884168669 44.4619248757502 40.2154497375715  
47.4740726032707 46.1101825640108 43.4885245598939 43.7585538437696  
46.4499258373233

LOC649700 39.266565827316 40.0527893189096 45.1569741609597  
49.1786207920603 46.7508829977587 48.7781962164988 51.7714254834195  
43.844855336215 48.1174861108648 49.6203214143464 41.8168470823451  
45.2783024981315

LOC649701 40.2543341073001 43.2649781354792 45.6989664108554  
43.074472921841 37.4470183315826 42.0574848021044 44.4639405506967  
45.8669209716694 41.863927676552 43.2988017098387 40.1742127891824  
35.1451084093692

LOC649702 43.2724556187214 44.5152708955623 43.0016969050339  
40.4359177791566 39.1650142708257 44.6524308640784 38.6243997507646



40.7311497914871 42.4540072551568 37.3179578037963 40.3452320167286  
45.0035308952466  
LOC649703 50.5670783769975 42.6939394537076 44.0451487108213  
45.4634652319753 48.8381507187986 49.4157684139858 46.0228732507872  
46.4672637826582 45.6582729799009 51.2318935933116 43.0971787292711  
41.7575097298927  
LOC649707 41.3387790895716 43.683792219729 48.1997158668729  
56.2508140932179 44.8897737954573 45.2852528185486 49.3854238365325  
44.293922970134 51.8083208406279 44.2580151149956 47.0940613507321  
43.2776458914333  
LOC649711 45.1912496459517 50.6774883370457 47.9035532886869  
40.4359177791566 41.3755760434934 40.8634043028528 40.0052661202207  
47.5950227477807 42.2577689927563 46.325232414659 49.9338905397767  
46.7182294568603  
LOC649712 47.5647821785529 43.7644428186265 46.0727230219512  
47.0874209746031 52.2089306840125 43.9724628401189 49.1067959632109  
43.1567024035183 40.0403898620771 47.4767851750188 43.9450023643394  
45.6692241948108  
LOC649722 59.6008106247114 57.5941849631773 42.3536549114165  
48.1662933382789 43.004943518025 44.0804700754786 76.7483302168542  
50.7364620410977 66.7008819035152 43.4885245598939 40.1742127891824  
40.7704587752083  
LOC649723 35.9305494063137 37.7384958256497 34.2890785915814  
38.745552403895 40.0599807618105 45.9266745571724 38.0598374201407  
41.5464765641928 34.9428206949566 41.2276963324981 34.174642681781  
37.5556299264699  
LOC649738 40.5654775358427 40.3384318592985 44.4311655729487  
40.0698728584484 39.1650142708257 43.4681646416585 43.9450023643394  
40.2382908228517 41.7627910693483 39.6719190054379 41.5421429082231  
45.9693232070002  
LOC649745 44.7044140979108 44.7829632472754 44.9758339877851  
41.6564075217517 35.6434124419782 41.4508241771315 39.1539892144371  
43.0390857698452 46.7760357462635 47.3791873993182 41.3553369544097  
42.357910063876  
LOC649747 43.3638918705225 38.7344853699576 34.1806289878747  
47.8164193292842 38.0598374201407 44.6524308640784 40.4359177791566  
39.853866204927 42.992884918158 42.2614524730856 39.9070785037411  
44.3521099857368  
LOC649749 39.5676051939342 39.6995529770239 39.0775870687758  
40.1804147506786 33.7494761745342 37.7000400506818 44.7255207589606  
42.8482181313226 35.6139301508335 33.9967481174035 41.1638563416981  
39.0536056496869  
LOC649754 50.5252048155459 48.0296332183129 49.3780606970538  
51.1055541075029 46.4732328055735 48.9826868640753 54.8074655158941  
47.9363875418976 48.6494451061637 51.7983110178095 47.7535797917441  
50.8442982601142  
LOC649757 33.2552842693684 35.4484652445078 41.785676764591  
32.9046688061235 44.3557408297309 37.9951997351435 36.634024014558  
35.9023742468744 39.3750969348308 36.6893251782922 35.6970528713709  
42.4607795638552  
LOC649762 41.8409927585705 47.6914221838216 43.9450023643394  
40.7481155008596 42.0709558258414 40.650742261428 42.7431359850339  
44.1311654985682 41.863927676552 44.2580151149956 41.3553369544097  
48.5123041297835

LOC649765 38.385865183581 41.0678614026819 43.0016969050339  
43.6726153508978 45.8051846088552 40.040778349137 42.7431359850339  
46.5717043290731 43.0930293831497 43.6033221838149 41.4508241771315  
38.9496515344837

LOC649768 44.8914371498528 43.1805016690297 43.9450023643394  
47.0874209746031 41.6806984441849 50.0748292497578 41.5817737564592  
46.2779564481158 41.5635499110307 45.4614234442527 43.7585538437696  
46.8129509799753

LOC649770 39.1590964332473 34.7135536792489 37.6557714476853  
37.7469621225553 36.2048942610546 41.6590564937735 37.1643693306382  
31.9468644542969 33.802253812079 31.8890957468737 36.6298807161755  
32.2133093774284

LOC649771 44.2350046179299 38.0226905622357 44.5134109184888  
37.1894304543751 36.6354013629791 40.040778349137 41.5817737564592  
32.229154316188 41.074824727477 42.3606390470387 42.6366765186182  
38.5279745308203

LOC649773 42.6036491382658 46.0713306971594 41.8751578329365  
35.8472302065546 34.3633615460307 44.9896851005259 40.0052661202207  
39.9576138799997 43.1805016690297 42.2614524730856 37.7384958256497  
42.357910063876

LOC649775 42.6036491382658 38.5252456306656 41.1367478979484  
49.1786207920603 36.9060997041453 40.244271403831 43.9450023643394  
39.2672712041774 43.3744503319109 38.0078357808393 42.357910063876  
41.3481355128089

LOC649783 36.2496364442264 43.7644428186265 42.9104454767916  
34.7266486944713 40.5710637884029 38.3418933808844 40.6750540874299  
40.4359177791566 41.7627910693483 38.528621456378 45.0589947942306  
38.8495095797881

LOC649784 39.5676051939342 35.9305494063137 44.1452943804044  
34.1051821768421 44.8897737954573 39.0266821712099 44.4639405506967  
41.8417024632349 36.2733735494625 40.5090849993014 46.4205654140754  
39.4490233720848

LOC649800 35.3608605269276 44.3187284857534 36.7172300749476  
34.8744680930445 34.4570158133896 36.3845892764084 34.1509644696334  
33.8237407699472 34.4716904283753 34.7308008643142 35.0063319869591  
31.372171135652

LOC649801 38.5007204246293 38.4330755397458 42.9104454767916  
35.49696651597 35.9058393060637 42.0574848021044 36.9355798143571  
36.6452480995946 39.853866204927 36.6893251782922 39.4410515050885  
39.3575468494941

LOC649804 42.6036491382658 33.8237407699472 45.989212296035  
41.4273122914951 37.7576900881741 43.9724628401189 50.3519150282938  
41.2551966132486 36.0741672064298 42.1622837416589 40.4504608195666  
43.7672102682067

LOC649812 41.0608773166058 38.2263227947189 39.7411455670172  
38.5252456306656 40.3452320167286 41.6590564937735 38.2933870238743  
37.4484310268909 40.137818555383 33.0508421547252 43.844855336215  
42.9887069977696

LOC649813 42.7150227340364 43.8495248991589 40.931294690669  
50.0526763693329 45.4751076037511 41.159706131351 41.706879587091  
38.8495095797881 42.1594905198929 46.0119912782855 41.2598458726002  
40.4639532172338

LOC649817 43.5710871617107 42.7775752471711 39.0775870687758  
43.1847628331565 40.4639532172338 44.8872784170036 41.706879587091

38.2782436497441 48.0163377492228 41.9666541498638 40.9157352260901  
36.064718696392  
LOC649821 1509.04753111016 2306.14613042834 2393.42629339901  
1521.20630233299 4617.45430247751 2791.75465171135 1744.56688411113  
1513.74711975248 1806.22468459769 2191.09005731751 2771.14077845128  
3190.0108307463  
LOC649823 42.1537476443423 43.683792219729 41.6977706798234  
36.4564050256915 35.4484652445078 40.3357777530419 39.3585350448719  
36.7460922671619 42.1594905198929 36.0481934423077 35.6970528713709  
43.4709415392696  
LOC649826 45.2875173643252 42.4493032770053 43.1931731665131  
38.8495095797881 43.844855336215 49.4157684139858 39.6535880152834  
42.9301944191913 44.4395580493118 45.6868589181768 36.9060997041453  
42.9887069977696  
LOC649841 51.0225132036905 55.8046062733709 50.0050760710506  
184.898658656843 44.2607789091176 65.4643755537228 116.242109750054  
119.088986733238 35.6970528713709 47.4767851750188 58.6464918752765  
48.3648494350286  
LOC649848 41.6354649482853 44.6918600441328 41.2365089689635  
41.1886975241176 39.1650142708257 42.357910063876 45.4799270968969  
43.1567024035183 40.9901805728485 40.8049408996274 41.5421429082231  
43.7672102682067  
LOC649851 39.5676051939342 45.0115870036541 41.2365089689635  
42.5664883002833 41.6806984441849 42.9695585740813 40.4359177791566  
41.5464765641928 45.0017158586743 44.6918600441328 41.0808257270221  
39.0536056496869  
LOC649853 42.2455707947223 39.6995529770239 39.2707964550441  
45.4634652319753 41.9842695818285 43.8582747295766 44.6032218589199  
39.6474008369935 47.0804681460898 38.528621456378 42.8263096141654  
37.1747156131306  
LOC649856 38.385865183581 38.5252456306656 50.0748292497578  
36.3604951341921 40.7779767565889 36.6271061451613 36.08956004634  
38.6454098044474 40.0403898620771 38.957687788868 35.046946054314  
35.4484652445078  
LOC649857 42.9104454767916 35.8227939208521 43.1931731665131  
52.6947911480086 37.6527901109005 44.2607789091176 38.2933870238743  
42.157627240486 40.7847110517594 44.7958122466628 39.9070785037411  
43.3744503319109  
LOC649858 40.9558083259517 39.8695929627783 42.2577689927563  
44.265834798964 45.2556760873335 40.4359177791566 43.4544762830742  
40.047314525032 42.357910063876 38.3092241935352 44.2142581488029  
39.3575468494941  
LOC649859 40.7609952437622 52.7493349111555 51.3268475761593  
43.4410741327254 51.6869155634183 42.0574848021044 57.2758638871082  
47.5950227477807 60.3977304934451 44.1379638573455 46.1673159982664  
52.8455400026194  
LOC649864 47.7267190613906 47.6914221838216 46.4569566520107  
44.4367387274922 41.1868052124344 32.5219627196161 37.830876898596  
46.4672637826582 40.8970401536578 45.1569741609597 52.104880481326  
47.0130468198828  
LOC649878 43.2724556187214 41.2598458726002 39.2707964550441  
38.9534635879195 43.9450023643394 39.3841861812262 40.0052661202207  
39.6474008369935 42.992884918158 41.3321861371202 41.6336636285875  
43.3744503319109

LOC649886 40.3478825593224 43.9421822132391 39.991353369336  
52.8502823653368 40.6723334103791 41.9543948167375 42.357910063876  
42.8482181313226 45.4799270968969 45.5776159432079 43.401782064778  
42.9887069977696

LOC649891 46.7293238583888 40.4359177791566 36.3604951341921  
42.2496337895968 37.7576900881741 44.7804080899431 35.7055410599146  
36.3405039629059 40.137818555383 36.4651112441576 37.2892641289258  
41.2437378488025

LOC649896 39.0620487644635 42.4493032770053 36.178547300352  
43.5627649099623 43.3332476888305 41.9543948167375 45.1017494688414  
36.3405039629059 31.6295801599123 37.2089297656361 39.5399188536544  
43.7672102682067

LOC649897 59.5000730792772 54.4793574349739 57.9279989359711  
59.8102324370568 63.8315840603904 59.9876575158981 67.1926218405833  
59.3164315859919 51.2066664465185 59.8130420783374 53.4088637045445  
53.7442594289333

LOC649902 37.7384958256497 40.8880530359822 44.2405728317107  
37.0732977341185 47.8075998240396 44.4619248757502 40.5585676679482  
42.2577689927563 45.0017158586743 48.9826868640753 42.0750889188255  
37.9607839934735

LOC649905 40.4639532172338 44.5152708955623 40.301483914446  
37.29566077996 37.0526522140242 38.2293008890613 39.3585350448719  
43.6434576713809 38.1169703906207 44.0409178714232 40.723990462047  
39.3575468494941

LOC649908 43.1805016690297 39.0102066700839 37.2838080935695  
44.9370339275041 40.6723334103791 41.9543948167375 39.4600924554505  
41.8417024632349 41.3803269429468 40.6022003765153 40.723990462047  
38.9496515344837

LOC649909 35.8208542506595 42.9358255168086 35.5220586859301  
39.2780515621926 39.5595233162192 37.4782441311626 51.9421032049606  
32.6039814489621 39.7537274655115 36.6893251782922 35.2339574411711  
43.9541718254769

LOC649910 36.5393857306744 37.3634897565502 44.7829632472754  
36.6501141438378 41.3755760434934 44.6524308640784 42.8684958525042  
37.4484310268909 44.5303781239209 41.4397539024976 37.1059647239814  
48.0350549043063

LOC649921 39.4710743516517 40.4359177791566 41.2365089689635  
40.5484717678957 36.5393857306744 44.1737502492846 37.3799542961839  
38.745552403895 44.5303781239209 44.8997235283254 41.7272875295469  
40.3691324547049

LOC649923 109.029196594263 1981.03929621057 1524.01520893763  
5525.13078364599 42.6022652963326 52.3187919317561 335.249352041342  
147.875578127733 38.4344387289956 36.1550293353654 34.3633615460307  
37.9607839934735

LOC649926 42.9104454767916 40.7952353240579 49.7350276169552  
41.4273122914951 44.8897737954573 48.5835484742456 48.3411413510851  
38.079222289614 38.4344387289956 39.5637454855233 45.4799270968969  
39.3575468494941

LOC649935 40.0557788909923 44.3529919625344 42.640829914102  
38.745552403895 44.9936360641969 41.159706131351 41.5817737564592  
42.5435283762933 44.0519245668737 45.2556760873335 39.9070785037411  
40.6614700944853

LOC649937 42.0532901689036 41.554942319225 39.8299340037009  
43.1847628331565 42.269054475455 45.0882356578404 44.2166118829877

42.4580504587581 48.3119523820103 39.4710743516517 41.9908237694988  
41.4508241771315  
LOC649940 34.5886782974123 39.5050383901884 39.6451483836089  
36.1562979552173 40.0599807618105 40.650742261428 40.3302268293707  
36.5393857306744 39.5806465938526 38.0078357808393 32.775958132716  
36.2582325396375  
LOC649942 45.2875173643252 42.8542642792862 43.0971787292711  
43.1847628331565 46.6397391251762 44.1737502492846 50.0088611244948  
40.931294690669 45.2897806651929 45.7911932481722 39.9899430628542  
49.1200355938198  
LOC649944 39.4710743516517 37.958111840848 39.7411455670172  
40.3691324547049 38.8834538955 33.6859433472087 38.4005795891396  
41.1575777497576 39.0458123429605 38.8507804383261 41.1638563416981  
39.0536056496869  
LOC649945 36.8072833828297 40.5400384479766 39.4710743516517  
35.0448343468967 38.8456942580061 31.9222834447339 36.5352572191451  
30.6485078361448 35.4332080966594 34.7308008643142 34.064698871541  
32.8921051249019  
LOC649946 85.33395043174 145.193498675059 118.288549974348  
120.679433440203 124.134493738558 142.680436288759 148.440257128143  
140.559370165331 134.335592890814 113.873117749074 129.005213737493  
181.966839676473  
LOC649947 36.6480005877129 36.1232327599945 38.7745734037492  
38.6414316877471 38.6454098044474 41.2567470068038 40.0052661202207  
37.5511560880902 37.7384958256497 40.6022003765153 41.9908237694988  
39.8497227447888  
LOC649948 41.0608773166058 42.5269793679335 36.4564050256915  
39.7411455670172 42.269054475455 38.9378717994178 41.5817737564592  
35.7973685350741 43.6670755115848 36.1550293353654 39.153226699662  
41.6550823405646  
LOC649951 40.5654775358427 42.2577689927563 45.1569741609597  
43.8002456102021 45.8051846088552 41.7627910693483 37.4772922422734  
40.931294690669 42.7150227340364 38.0078357808393 35.860430241131  
38.1421709520616  
LOC649952 32.0823591288671 36.5219488315447 35.6139301508335  
30.0771630269067 34.6227169056411 36.6271061451613 35.9894133432376  
36.9355798143571 36.7267557061938 37.2089297656361 34.6366195121669  
36.8690774823319  
LOC649956 41.2424637338424 40.5400384479766 42.0621425894624  
45.8844325913247 43.3332476888305 40.040778349137 41.4742337714895  
43.5544347011646 42.8036731479932 42.785429206422 46.6442692119997  
44.7401523707775  
LOC649957 45.1912496459517 36.1232327599945 35.9305494063137  
40.7481155008596 38.0598374201407 42.750861693377 42.1607322031054  
36.6452480995946 39.3750969348308 34.4875013487777 37.3687900733549  
42.357910063876  
LOC649963 42.7150227340364 44.0409178714232 52.3432130135266  
45.334106390212 40.6723334103791 38.7340969861754 40.7910160811527  
40.047314525032 42.1594905198929 33.6188027862739 44.4688999098904  
39.1553169409075  
LOC649965 39.4710743516517 39.8695929627783 39.4710743516517  
42.5664883002833 40.6723334103791 40.650742261428 39.3585350448719  
34.064698871541 39.1790517315259 38.528621456378 44.2925355984056  
42.1537476443423

LOC649967 35.1307934330047 45.1694246393676 43.3085358214154  
46.614092935749 34.5301949364147 47.3791873993182 37.0564573649223  
38.2782436497441 39.3750969348308 41.3321861371202 42.0750889188255  
39.2469742642337

LOC649970 94.080489738662 263.068504548549 71.3527183280827  
67.8978240198575 417.331253559307 90.2790229242453 512.951288394692  
545.514314651238 682.479411898549 220.597255695837 225.960701908311  
204.862161704394

LOC649971 40.2543341073001 38.9338521051669 34.8956628705329  
40.646702696033 45.4751076037511 40.040778349137 40.1235656101329  
37.4484310268909 45.6582729799009 39.3698811593364 45.7328341667151  
43.3744503319109

LOC649974 42.5193208629123 44.1239711172417 40.4070046183108  
41.5464765641928 46.0043807840705 43.7630587657205 42.8684958525042  
39.3709357615493 45.4799270968969 46.441301934328 42.5426057453993  
40.1700117452801

LOC649975 44.2350046179299 41.8848959280916 46.3411353377615  
44.6905691366696 40.7779767565889 43.5752393599169 42.0605906240248  
44.1311654985682 43.1805016690297 42.4594149893798 44.553780984244  
39.8497227447888

LOC649977 38.304249186058 40.7952353240579 44.2405728317107  
42.9358255168086 44.6834648302383 43.9724628401189 36.9355798143571  
39.5466975353131 44.4395580493118 41.8613406887824 36.9060997041453  
40.0557788909923

LOC649978 44.8914371498528 40.0527893189096 43.8495248991589  
41.7614975630362 46.4343327861696 44.2607789091176 43.8206425661746  
53.1052228246467 39.853866204927 41.9666541498638 45.2265319826548  
38.745552403895

LOC649979 44.7915315085948 45.0905928998779 41.2365089689635  
44.550322123994 43.4544762830742 43.4681646416585 41.3594868055879  
44.7044140979108 43.6670755115848 44.4652605017595 39.5399188536544  
43.8575940017119

LOC649984 40.5654775358427 43.0227387991135 37.8386378737561  
43.9282059368202 37.0526522140242 35.6125439901743 47.8947595316832  
38.4540849632254 40.137818555383 41.0057887014368 40.723990462047  
39.7411455670172

LOC649987 46.1673159982664 35.6434124419782 37.2838080935695  
42.4580504587581 45.8051846088552 39.9397419279057 44.9863726205428  
40.7311497914871 37.5469247328848 42.4594149893798 42.911855821602  
45.0035308952466

LOC649990 46.7293238583888 44.0409178714232 43.0971787292711  
40.8681871019812 38.9496515344837 39.4953494583071 46.1634822993009  
40.931294690669 42.1594905198929 43.844855336215 35.6970528713709  
45.7562276914441

LOC649991 43.0001432913058 38.0226905622357 37.1643693306382  
37.651298468202 37.4470183315826 38.3418933808844 49.1067959632109  
43.0390857698452 47.0804681460898 43.1839109702714 41.7272875295469  
48.6037684272115

LOC649993 37.55264801907 44.3529919625344 47.0055981216687  
46.3203995372658 47.2074332636566 44.1737502492846 47.1345949868029  
51.555506218204 51.5888395924843 49.3000844711116 43.7585538437696  
45.9693232070002

LOC649999 40.8681871019812 43.5873188565519 38.8775560911841  
42.8235313007746 39.3667161654772 39.9397419279057 42.8684958525042

40.6171774724171 45.2897806651929 38.4187686307607 44.1148826235374  
36.6603338274678  
LOC650003 41.3387790895716 49.5443425465542 41.6977706798234  
38.8495095797881 59.4830424460714 41.0582900711341 45.4799270968969  
42.7431359850339 39.5806465938526 45.9004543328976 50.8826620053386  
43.6753843488695  
LOC650005 39.0620487644635 33.4316681623175 42.3536549114165  
32.554751989205 43.3332476888305 43.0860383229288 40.6750540874299  
37.2237132058632 34.226171989766 40.7063426028871 40.4504608195666  
44.4475838947656  
LOC650006 38.304249186058 38.4330755397458 40.8420925848403  
44.7980740332174 38.4540849632254 39.3841861812262 42.7431359850339  
42.8482181313226 35.3227485563945 43.1839109702714 44.2925355984056  
41.1554481567603  
LOC650008 45.4799270968969 51.2405397507224 45.989212296035  
42.9358255168086 49.0828761839116 43.0860383229288 42.1607322031054  
37.6557714476853 48.8842909466002 44.1379638573455 41.1638563416981  
44.1452943804044  
LOC650009 40.4639532172338 43.683792219729 44.9758339877851  
41.4273122914951 37.3508690072156 40.4359177791566 43.8206425661746  
39.9576138799997 43.4656637536244 37.4302011516587 40.2649309204478  
43.0930293831497  
LOC650010 42.3433931248155 43.1805016690297 45.310660704531  
45.4634652319753 44.5668141895992 44.3648993568405 41.8315602975157  
42.4580504587581 43.6670755115848 51.8412522234186 39.9899430628542  
43.9541718254769  
LOC650013 41.1523487516364 39.8695929627783 39.7411455670172  
35.314469458379 39.2608760193011 43.5752393599169 40.5585676679482  
40.7311497914871 46.581796165231 44.8997235283254 40.0766543123257  
44.4475838947656  
LOC650014 40.4639532172338 39.1982470626863 36.2683886571585  
43.074472921841 39.859345745831 37.8102105794655 43.8206425661746  
38.6454098044474 44.0519245668737 40.6022003765153 41.7272875295469  
36.3454320848591  
LOC650020 39.8662795144616 49.9085372049438 49.4573631027613  
40.8681871019812 39.1650142708257 47.3791873993182 45.6042625176633  
39.4710743516517 55.8510296341925 35.2880714952489 46.824299585607  
52.6922486991742  
LOC650024 39.8662795144616 41.554942319225 39.1799070031819  
39.7411455670172 45.6895223823001 39.132725377815 42.4939802311136  
37.2237132058632 43.9450023643394 43.2988017098387 38.1835938174625  
43.1805016690297  
LOC650028 38.304249186058 34.2618170189676 38.8775560911841  
43.9282059368202 35.3327761997046 41.0582900711341 45.223075311113  
37.7612949798895 39.4762546236449 32.6203270051744 38.5668610487033  
42.4607795638552  
LOC650029 166.064317271991 148.817606651444 146.311363191836  
152.187430924861 190.348435737155 136.377736482671 224.249210397247  
190.940906139713 162.106596527489 148.570371099987 128.300809076274  
133.781790945099  
LOC650030 41.6354649482853 44.5152708955623 44.7829632472754  
44.0451487108213 50.0580547772867 46.7800033479223 45.6042625176633  
44.7044140979108 47.4699236780425 59.3618843678775 48.3847843498476  
43.7672102682067

LOC650034 56.921728372453 84.9182861692273 61.356483470053  
62.6048727240291 73.3533274030352 72.3523300799007 65.8986841086198  
50.7364620410977 88.6368226476614 55.6069214673486 48.5292718280498  
72.6182747525443

LOC650036 37.4554876386402 40.4359177791566 37.0642268327439  
38.0958223740111 42.3685136297603 44.7804080899431 35.3362091871364  
36.0306975524309 36.0741672064298 40.6022003765153 39.7342718293432  
40.9683275553869

LOC650037 40.4639532172338 46.7591817286632 45.310660704531  
36.264823544143 46.5557478175976 39.6251842352088 43.3262148375525  
36.9355798143571 48.5792058061372 40.7063426028871 46.2560238004757  
42.9887069977696

LOC650038 41.5421429082231 43.4396866157171 42.8270038153139  
40.7481155008596 41.3755760434934 42.9695585740813 40.4359177791566  
38.8495095797881 42.357910063876 38.0078357808393 38.1835938174625  
42.8864415494484

LOC650040 39.6609238036815 37.4540772310118 44.2405728317107  
39.2780515621926 53.6907197364586 37.0180934800573 43.1931731665131  
47.2864663693787 41.3803269429468 36.4651112441576 38.956280281655  
38.9496515344837

LOC650058 49.540449125788 42.0709558258414 44.3344900481112  
40.7481155008596 43.4544762830742 43.0860383229288 42.9803717121865  
48.87875862356 46.581796165231 43.844855336215 42.0750889188255  
46.4499258373233

LOC650061 44.3355304829989 38.0226905622357 37.7384958256497  
39.3750969348308 41.0885562160946 39.2248354955045 40.7910160811527  
43.1567024035183 38.8271346375425 38.4187686307607 34.7308008643142  
40.9683275553869

LOC650062 45.8108990837624 34.3715326040967 43.1931731665131  
49.9014504704021 41.2740822675592 40.650742261428 34.1889222434768  
41.1575777497576 42.1594905198929 38.957687788868 43.5710871617107  
41.5536168238478

LOC650074 46.263826584899 40.6380495994768 44.2405728317107  
45.334106390212 40.7779767565889 42.9695585740813 43.5627649099623  
45.3872406432794 40.137818555383 41.5435611403119 40.0766543123257  
40.7704587752083

LOC650076 45.5758521267508 40.148780650831 38.0452862258803  
41.0726336841311 38.5512429290626 35.7034203372528 37.2892641289258  
43.6434576713809 34.1294694030979 37.920964499903 35.7953070087288  
37.0953622406687

LOC650087 40.3478825593224 40.6380495994768 39.2707964550441  
51.0175677516029 42.1650127805175 43.7630587657205 45.8980298854198  
39.9576138799997 39.9444191873552 45.9004543328976 44.7114813656401  
43.5738557773903

LOC650095 40.8681871019812 39.3999056968598 47.4740726032707  
44.9370339275041 35.7973685350741 35.0970060242246 33.2425023465738  
37.0390589468421 39.5806465938526 38.2069499294002 40.0766543123257  
40.9683275553869

LOC650098 40.4639532172338 42.1607322031054 45.7968648044613  
42.357910063876 41.2740822675592 36.3845892764084 44.2166118829877  
42.357910063876 39.853866204927 39.9948390976317 42.0750889188255  
38.2350720635382

LOC650103 39.3709357615493 38.4330755397458 39.1799070031819  
33.1817617228171 38.4540849632254 34.9849896310235 35.4623691645629



36.6452480995946 36.3649677956953 38.8507804383261 31.859589438824  
38.3291713594599  
LOC650107 43.0930293831497 40.8880530359822 40.4882741869718  
44.9370339275041 45.1137938810047 40.5281496800812 44.2166118829877  
43.5544347011646 43.6670755115848 45.6868589181768 41.5421429082231  
38.3291713594599  
LOC650111 60.7371790125714 67.7189686993694 71.1521292570086  
63.1604223919703 79.5175547131776 51.0506441018166 54.6414321010929  
60.7942162859036 50.0526763693329 46.6598879466655 52.5154971256566  
62.8485724004124  
LOC650114 35.3227485563945 41.0678614026819 35.7105247506212  
38.6414316877471 42.7982502551634 36.3845892764084 35.9894133432376  
37.6557714476853 36.9060997041453 41.3321861371202 40.1742127891824  
36.5474283500601  
LOC650116 66.6547247910487 52.8264142735929 71.3527183280827  
73.0371862899659 52.5645416722441 60.5803031036931 82.5050369860039  
57.445796273665 68.5599263000733 71.3900857589616 51.5822637582617  
50.8999542937724  
LOC650118 39.4710743516517 36.9994058279362 38.3166554965434  
39.6292788039793 37.1565984182084 39.2985791324641 42.2577689927563  
38.956280281655 38.8271346375425 35.8304004211528 39.2542963855807  
42.1537476443423  
LOC650120 40.9558083259517 44.8529259387308 41.437237454134  
44.9370339275041 44.8897737954573 41.8613406887824 39.0458123429605  
45.8669209716694 42.5406888281114 42.3606390470387 38.1835938174625  
42.0424641526302  
LOC650122 45.4799270968969 42.3550738181144 46.0727230219512  
42.6913548400127 41.1868052124344 44.3648993568405 47.4439407315335  
44.6107027295193 48.0163377492228 46.0119912782855 45.4799270968969  
44.2527566343661  
LOC650128 82.5344501505114 101.940584589951 105.572103854818  
126.14245679817 68.6627996695828 66.8632294055679 72.0568616357755  
199.660904693786 59.9108736364178 124.683201596193 120.533617429145  
130.62791061956  
LOC650132 43.9309845324767 49.9547657591437 53.3127618245672  
41.0726336841311 40.8873907150245 91.2681347227088 44.3440839686558  
46.9986083378817 47.6195009345747 43.1839109702714 42.5426057453993  
58.5478485621444  
LOC650137 39.1059888887285 37.5469247328848 40.0998167098057  
39.4569929845912 39.3999056968598 40.2945586900975 40.6750540874299  
43.2551508830106 38.5252456306656 39.1621898366355 39.4749602565407  
39.8497227447888  
LOC650140 43.2724556187214 44.2630383225933 42.9104454767916  
148.736019591731 40.2449343247539 42.5660695551615 42.2577689927563  
46.3685439301234 41.863927676552 45.5776159432079 41.8168470823451  
42.6758568421347  
LOC650144 36.6480005877129 36.4002279956519 35.7105247506212  
36.1562979552173 34.0927410219282 42.0574848021044 38.7337086062875  
37.33030683349 38.0213051227859 39.2623423164488 41.9908237694988  
43.9541718254769  
LOC650146 40.148780650831 40.0527893189096 40.4882741869718  
40.0698728584484 39.3667161654772 44.9896851005259 39.8695929627783  
44.1311654985682 38.5252456306656 38.745552403895 41.1638563416981  
42.1537476443423

LOC650147 45.7356815244513 42.8542642792862 44.4311655729487  
44.265834798964 43.004943518025 43.9724628401189 43.3262148375525  
45.2806199505029 45.3756389170606 46.1390887492649 41.9083581529276  
44.4475838947656

LOC650148 43.5710871617107 39.0102066700839 40.301483914446  
41.7614975630362 41.9842695818285 36.8059561571675 36.9355798143571  
41.8417024632349 40.9901805728485 41.4397539024976 41.9908237694988  
44.6484005362281

LOC650151 44.8914371498528 38.1312950900467 37.0642268327439  
45.1944222548351 43.5544347011646 42.5660695551615 45.6042625176633  
44.1311654985682 40.7847110517594 42.2614524730856 41.6336636285875  
41.4508241771315

LOC650152 1896.06380611235 1652.85734308754 1771.43541011426  
1925.20977162704 1333.01876209753 1473.52943897204 1718.44944271916  
3520.7579823657 1123.99110499679 911.661341702443 975.02086340962  
1073.84987604662

LOC650154 38.5007204246293 34.7135536792489 36.9795961564828  
36.9912468186322 36.2048942610546 35.6125439901743 31.9682164860619  
35.9023742468744 33.5578650644246 39.1621898366355 36.3390947880186  
36.8690774823319

LOC650155 49.2595762436995 48.7847528954724 62.0008474085033  
48.309866878365 46.1804647841331 47.2009420656854 53.1884505015411  
43.7396619462033 46.0106098064475 41.4397539024976 49.2206713037152  
47.9566297250148

LOC650159 48.1125722136997 43.5182502375207 44.4311655729487  
40.3180310664156 47.6884372645373 46.1513019317765 42.629412460409  
41.8417024632349 58.8201021345225 45.9004543328976 44.8872784170036  
42.0424641526302

LOC650162 41.6354649482853 43.2649781354792 47.5673419710251  
44.7980740332174 38.5512429290626 46.1513019317765 45.8980298854198  
43.6434576713809 47.27543600687 41.1222709786153 44.1148826235374  
45.7562276914441

LOC650167 44.0328992213727 43.1464706017434 42.6920011548175  
46.6849259108754 43.6587492470348 42.808889470973 45.9635923776719  
42.0494116081998 40.8420925848403 41.7405682794166 42.6776449468246  
44.4067063477243

LOC650174 42.1537476443423 45.7317208802318 44.1452943804044  
43.074472921841 49.452985143568 45.1873487463472 47.4439407315335  
46.0633179231318 43.1805016690297 47.4767851750188 45.390192977585  
42.4607795638552

LOC650180 44.9896851005259 33.8237407699472 36.4564050256915  
40.9607305725196 37.0526522140242 39.4953494583071 37.0564573649223  
34.9580369221164 39.853866204927 39.9948390976317 36.8282383070068  
36.449101775775

LOC650185 44.5282181324797 43.0227387991135 43.3085358214154  
53.593974682612 39.3667161654772 40.650742261428 45.7452456977857  
43.0390857698452 45.3756389170606 41.9666541498638 44.2925355984056  
52.5752569429057

LOC650187 42.3433931248155 42.8542642792862 41.8751578329365  
40.8681871019812 42.1650127805175 37.4782441311626 44.3440839686558  
44.797320243931 34.9428206949566 42.1622837416589 40.547835538778  
41.2437378488025

LOC650188 38.6454098044474 42.9358255168086 55.094385444315  
55.6481366056639 49.1928206164702 47.2009420656854 49.540449125788

41.2551966132486 43.9450023643394 40.6022003765153 35.6970528713709  
38.2350720635382  
LOC650193 39.9697332660833 42.1607322031054 36.769073068743  
37.4223289687135 33.8558232866797 35.0970060242246 38.7337086062875  
34.8949555140527 36.0741672064298 39.8873706855774 34.7308008643142  
43.3744503319109  
LOC650195 36.4564050256915 35.9305494063137 38.8775560911841  
37.1894304543751 33.9142669203111 35.8227939208521 35.9058393060637  
34.4896350146096 37.7384958256497 36.1550293353654 34.7308008643142  
35.9604262434141  
LOC650200 43.3638918705225 71.3015974749703 94.5055588176321  
40.5484717678957 86.8871118411414 48.0350549043063 102.294142438313  
71.0593419018503 114.719721626067 57.3562426592112 52.3761286517985  
55.1804535845496  
LOC650203 40.2543341073001 38.8336427948187 36.9795961564828  
44.265834798964 41.2740822675592 48.9826868640753 43.9450023643394  
39.0620487644635 37.10170285405 46.2286164776607 48.2050207071554  
42.0424641526302  
LOC650210 39.5676051939342 36.3110701990588 38.5045333213784  
37.29566077996 46.7508829977587 37.1317006162938 36.7356360093603  
42.157627240486 36.0741672064298 37.3179578037963 40.9157352260901  
36.064718696392  
LOC650212 41.4508241771315 41.554942319225 37.3687900733549  
37.8442841690502 33.4316681623175 40.9506062495231 36.197424053556  
38.8495095797881 38.5252456306656 36.3612409063792 40.3452320167286  
37.1747156131306  
LOC650214 42.442231667357 43.2649781354792 44.2405728317107  
38.3166554965434 39.9697332660833 39.9397419279057 36.197424053556  
37.6557714476853 36.0741672064298 36.0481934423077 36.43924066428  
39.6352613956998  
LOC650215 229.159869771704 229.992809034971 223.562130663956  
183.028254350275 286.497342437243 238.893145911331 252.775631043952  
142.545268664218 555.356799014777 114.796237914478 118.951970882732  
192.058030454066  
LOC650217 39.1590964332473 41.8848959280916 39.3709357615493  
35.314469458379 40.8873907150245 38.9378717994178 39.8695929627783  
40.4359177791566 42.992884918158 42.5664883002833 39.3667161654772  
45.8546719310325  
LOC650227 37.3463875295726 40.6380495994768 29.4322896559759  
39.3750969348308 35.6434124419782 42.0574848021044 35.4623691645629  
40.1474543172332 35.5220586859301 34.2638875325204 40.2649309204478  
37.4554876386402  
LOC650235 38.1169703906207 45.4143854024453 47.646800205189  
49.9014504704021 45.1137938810047 41.9543948167375 42.8684958525042  
44.0390019242862 42.0621425894624 39.8873706855774 42.7275315121163  
41.0657892043496  
LOC650238 38.6454098044474 40.6380495994768 41.1367478979484  
38.3166554965434 41.5668884168669 44.2607789091176 40.3302268293707  
37.6557714476853 36.8127605061228 43.401782064778 34.174642681781  
40.4639532172338  
LOC650239 34.5425384901279 35.0222940937513 37.1643693306382  
37.0732977341185 36.9702228618069 36.6522278218553 41.4369824439795  
38.1835938174625 34.7097550735003 38.0540928703622 38.1253290586431  
35.9604262434141

LOC650241 45.7356815244513 44.0409178714232 44.9758339877851  
51.223859150798 39.5595233162192 40.8634043028528 40.4359177791566  
42.157627240486 45.6582729799009 45.6868589181768 46.5650556481721  
41.2437378488025  
LOC650243 41.6354649482853 38.2263227947189 43.3085358214154  
43.8002456102021 45.5809132232681 43.9724628401189 47.8947595316832  
36.8400213077707 43.4656637536244 38.1042454705119 40.9157352260901  
46.4499258373233  
LOC650247 48.3814421939888 41.554942319225 41.8751578329365  
46.614092935749 39.859345745831 46.6872654833579 46.4388841354122  
37.9837233601316 38.7298222155532 51.2318935933116 42.170702295259  
44.5432192783161  
LOC650251 38.957687788868 39.8695929627783 39.1799070031819  
36.4564050256915 37.5556299264699 40.4359177791566 38.4005795891396  
36.43924066428 42.357910063876 43.2988017098387 34.8383995317036  
39.1553169409075  
LOC650253 34.4896350146096 42.7775752471711 31.7645650530049  
38.3166554965434 36.9060997041453 37.1317006162938 35.7055410599146  
39.6474008369935 37.10170285405 36.1550293353654 45.1432412071268  
43.4709415392696  
LOC650254 39.4710743516517 39.8695929627783 40.8420925848403  
46.4555908533915 38.8456942580061 37.4782441311626 41.5817737564592  
39.4710743516517 56.0496524902806 37.0320432433314 43.1931731665131  
37.3600014814388  
LOC650256 47.5647821785529 37.7384958256497 40.4882741869718  
39.853175885492 35.6434124419782 36.9060997041453 41.5817737564592  
37.86982638952 42.5406888281114 45.9004543328976 39.6403089864678  
42.9887069977696  
LOC650257 42.3433931248155 38.0226905622357 41.2365089689635  
37.7469621225553 39.6535880152834 36.3845892764084 40.7910160811527  
40.3357777530419 46.0106098064475 41.5435611403119 42.911855821602  
39.6352613956998  
LOC650261 41.4508241771315 37.2810767789306 44.4311655729487  
42.4580504587581 37.8679241954337 37.9951997351435 41.5817737564592  
30.0771630269067 42.7150227340364 42.785429206422 38.6662194645633  
40.6614700944853  
LOC650263 43.1805016690297 43.7644428186265 40.4070046183108  
40.3180310664156 42.6022652963326 37.9003288112261 43.8206425661746  
40.3357777530419 45.4799270968969 36.6893251782922 41.4508241771315  
42.7782216342806  
LOC650268 44.7044140979108 38.7344853699576 43.6670755115848  
44.4367387274922 43.7517118200398 44.9896851005259 41.3594868055879  
45.7476095696859 42.2577689927563 40.4136535208406 44.1148826235374  
44.2527566343661  
LOC650274 43.3098985178373 51.2405397507224 46.7508829977587  
49.9672547361866 44.7210190486327 41.1090481599939 50.2535501495675  
44.2527566343661 50.6750785584772 43.401782064778 46.7386599624801  
45.3763275588341  
LOC650276 6413.42384145372 6606.35767508139 5218.25814076207  
4752.94498024732 5018.90384962952 5246.60459228386 4550.56817942699  
4216.69417265779 4898.89844391477 6134.89208517976 5479.94045861143  
7127.13565491501  
LOC650278 45.8108990837624 48.275452803061 45.1569741609597  
39.6292788039793 45.5809132232681 47.5733603903505 51.4349390827895

49.2019743609873 38.6322728994674 45.7911932481722 50.7903824729818  
48.1627097465883  
LOC650280 43.4626049853157 41.3610369241157 43.401782064778  
46.0228732507872 44.3557408297309 41.6590564937735 39.1539892144371  
44.0390019242862 43.2761454096265 41.1222709786153 43.0971787292711  
39.4490233720848  
LOC650285 46.6348258763289 36.3110701990588 42.5406888281114  
39.1706564265495 39.9697332660833 39.132725377815 40.7910160811527  
43.4544762830742 38.7298222155532 44.0409178714232 45.390192977585  
37.5556299264699  
LOC650293 42.8539910132415 38.3874422458351 42.108130037421  
43.0016969050339 46.1513019317765 41.7256940298128 38.977631784251  
42.5435283762933 43.3744503319109 40.3235655331796 39.3789825717286  
41.0657892043496  
LOC650295 39.3709357615493 42.0709558258414 35.4484652445078  
36.9912468186322 38.5512429290626 34.3887641786747 43.3262148375525  
39.3709357615493 40.5912213523345 39.5637454855233 43.0971787292711  
38.4330755397458  
LOC650296 49.7188990489616 51.3800036046133 49.6347864008749  
50.2163892855092 47.5647821785529 46.0364000143537 45.8980298854198  
55.3122077514658 51.5888395924843 48.8623729374733 51.3861659123096  
49.6629259325705  
LOC650298 92.084526929319 135.997802304719 109.444250004973  
88.5511408870489 74.9661773375536 143.932614622477 85.6236091398006  
295.312692092025 134.447479156221 162.07814488773 82.1062834830477  
72.6182747525443  
LOC650311 41.1523487516364 41.6466169548846 40.931294690669  
43.5627649099623 41.9842695818285 43.4681646416585 34.1889222434768  
39.7509165247419 42.992884918158 36.0481934423077 42.911855821602  
40.3691324547049  
LOC650314 37.0320432433314 37.4540772310118 37.8386378737561  
45.5869891570251 41.3755760434934 30.493888765264 32.6039814489621  
36.6452480995946 39.1790517315259 42.3606390470387 34.7308008643142  
43.2776458914333  
LOC650321 39.0620487644635 44.2630383225933 38.2280071951674  
42.0102671859606 38.3561682218911 42.357910063876 39.8695929627783  
45.8669209716694 44.1519466943185 34.6720534245631 37.3687900733549  
43.1805016690297  
LOC650323 36.5393857306744 37.5469247328848 33.281531405287  
33.9645433044281 34.5301949364147 41.554942319225 38.1793598983615  
36.9355798143571 35.9645119596869 34.5718473203083 32.1218888714537  
37.8490162439785  
LOC650325 43.1805016690297 44.0409178714232 46.6588655218735  
43.6726153508978 47.0954207417646 47.2927436772465 45.6042625176633  
44.7044140979108 40.137818555383 47.4767851750188 42.357910063876  
39.9519547348106  
LOC650329 40.3478825593224 40.716553247236 40.931294690669  
40.1804147506786 40.8873907150245 41.4508241771315 35.9894133432376  
41.3506832276112 41.4636047919453 43.9450023643394 38.956280281655  
32.3796054199032  
LOC650330 41.4508241771315 37.2810767789306 37.5597671487621  
39.9697332660833 34.0045980663271 33.3470732872681 35.6056062164318  
36.6452480995946 37.10170285405 34.3674468322242 37.5583886316038  
34.6720534245631

LOC650339 48.6621527194963 50.543526404059 54.7350451926204  
47.5733603903505 66.6894494536346 47.3791873993182 54.7105548454293  
43.3838505886856 50.3745056312199 47.3010040326346 46.1390887492649  
47.2131144508464

LOC650341 40.7609952437622 39.7835513496873 37.7384958256497  
44.265834798964 38.2496050953547 38.1169703906207 44.0687697278114  
40.7311497914871 36.8127605061228 42.1622837416589 35.7953070087288  
42.7782216342806

LOC650342 41.0608773166058 39.1982470626863 48.8941062980393  
38.6414316877471 42.7107928951766 43.0860383229288 40.9157352260901  
43.844855336215 41.2870505273664 45.1569741609597 46.824299585607  
40.2669497398702

LOC650346 42.0532901689036 41.9894412416874 46.2625470410195  
45.8844325913247 39.6535880152834 43.1826328292558 38.6243997507646  
40.4359177791566 43.4656637536244 39.8873706855774 50.4740079109854  
45.9693232070002

LOC650361 38.957687788868 36.0366673493555 35.9305494063137  
38.2041059863839 41.9842695818285 40.1428591998404 42.4939802311136  
36.0306975524309 41.2870505273664 42.5664883002833 36.9060997041453  
41.1554481567603

LOC650363 44.0328992213727 40.7952353240579 46.9040704638073  
45.5869891570251 44.3557408297309 43.0860383229288 45.6042625176633  
44.5029690493211 45.3756389170606 41.8613406887824 42.4580504587581  
43.3744503319109

LOC650369 1670.01014610464 2101.59244895554 1236.32289322872  
711.08269990525 1421.44237064813 358.194667053419 2465.65854657837  
1201.00042684883 1638.16317738035 1201.00042684883 830.295872113419  
1323.73429724066

LOC650373 42.9104454767916 39.6995529770239 39.5450079747895  
43.3078542962968 41.3755760434934 43.5752393599169 36.4098694708483  
44.2159020605784 44.2607789091176 38.2069499294002 41.5421429082231  
42.0424641526302

LOC650387 43.3638918705225 41.554942319225 41.785676764591  
50.378948785456 42.7107928951766 42.0574848021044 46.7100796279384  
42.5435283762933 47.1744296124496 42.2614524730856 39.7342718293432  
38.1421709520616

LOC650390 47.8249696958403 44.9370339275041 45.063792968927  
53.8086134112366 49.0828761839116 46.7800033479223 48.0283573444179  
46.695848687694 39.6609238036815 42.8936990772838 43.0971787292711  
42.0424641526302

LOC650392 35.6111578834671 39.1982470626863 35.9305494063137  
39.3750969348308 39.3667161654772 42.0574848021044 41.8315602975157  
38.5457716679071 35.1155486926999 39.0648733099061 38.8507804383261  
39.6352613956998

LOC650399 43.3638918705225 36.1232327599945 40.4882741869718  
41.8778873678551 37.3508690072156 38.2293008890613 37.4772922422734  
41.5464765641928 43.9450023643394 35.93950183586 36.9060997041453  
39.9519547348106

LOC650406 43.6706764143908 44.9370339275041 45.3974838013476  
39.3750969348308 43.1252272136667 41.159706131351 42.4939802311136  
44.2159020605784 39.2809305246091 43.7303813515864 41.8168470823451  
43.8575940017119

LOC650407 38.8561375693335 43.5873188565519 41.0356368374708  
42.1273928203021 36.3390947880186 47.2009420656854 45.3597029614942

40.831207953647 37.0126425326534 42.8936990772838 35.3362091871364  
37.5556299264699  
LOC650410 38.385865183581 36.6968906669565 40.1985790927248  
36.1562979552173 38.3561682218911 39.7394181011603 41.0381860307445  
39.0620487644635 36.5393857306744 38.745552403895 39.9070785037411  
41.4508241771315  
LOC650412 43.4626049853157 41.6466169548846 44.5134109184888  
43.5627649099623 43.2484996523549 42.9695585740813 46.5650556481721  
48.9826868640753 42.357910063876 38.0078357808393 38.956280281655  
44.6484005362281  
LOC650418 42.3433931248155 43.0971787292711 49.7350276169552  
44.265834798964 49.8304479381623 38.9378717994178 46.4388841354122  
44.4031868028216 39.0775870687758 43.0919221375514 43.401782064778  
47.7962548556026  
LOC650422 42.6036491382658 47.2055133646385 42.4580504587581  
38.8495095797881 41.467005949568 36.3845892764084 37.1643693306382  
40.931294690669 41.3803269429468 46.2286164776607 37.7384958256497  
39.7411455670172  
LOC650427 36.9060997041453 40.8880530359822 39.5450079747895  
38.8495095797881 43.1252272136667 35.8227939208521 42.357910063876  
39.4710743516517 39.9444191873552 37.8217989841918 37.4642807402741  
39.4490233720848  
LOC650428 47.3791873993182 46.2286164776607 46.1653991089885  
43.3078542962968 48.0234896130991 45.7300501624017 46.0228732507872  
43.0390857698452 46.581796165231 44.1379638573455 43.0971787292711  
45.3763275588341  
LOC650429 50.1533437545239 42.4493032770053 40.931294690669  
37.1894304543751 42.1650127805175 40.650742261428 43.0930293831497  
44.0390019242862 52.1788489555942 36.8059561571675 35.4386677371439  
37.5556299264699  
LOC650433 47.0940613507321 44.7829632472754 45.063792968927  
47.481302504066 39.2608760193011 45.9266745571724 39.7576136507593  
34.6977013306396 38.4344387289956 41.7405682794166 34.7308008643142  
42.4607795638552  
LOC650436 39.266565827316 37.10170285405 39.9101908547397  
38.8495095797881 32.8704945047196 41.554942319225 40.0052661202207  
35.6825474397235 37.7384958256497 38.3092241935352 37.0180934800573  
38.6454098044474  
LOC650439 43.1805016690297 41.8073910693411 42.2577689927563  
41.4273122914951 42.1650127805175 37.9951997351435 41.9393838138203  
42.4580504587581 36.2733735494625 42.0621425894624 41.4508241771315  
42.6758568421347  
LOC650454 41.7397731376692 41.9894412416874 42.5406888281114  
38.4208429103799 43.9450023643394 47.9503724044453 48.1747307200218  
40.2382908228517 35.4332080966594 47.4767851750188 43.844855336215  
37.3600014814388  
LOC650455 43.844855336215 42.3550738181144 45.4865173433646  
42.4580504587581 41.8806343997257 43.5752393599169 45.3597029614942  
35.9023742468744 38.9834959368496 41.2276963324981 45.7328341667151  
42.0424641526302  
LOC650458 39.1590964332473 43.0227387991135 44.9758339877851  
42.357910063876 41.7929491793697 42.157627240486 39.7576136507593  
41.1575777497576 41.5635499110307 40.8049408996274 42.7275315121163  
42.57175366709

LOC650459 38.7537364570873 37.5469247328848 34.6977013306396  
38.0958223740111 34.2638875325204 40.8634043028528 39.6535880152834  
38.5457716679071 41.7627910693483 37.920964499903 36.7283081422707  
40.1700117452801

LOC650463 40.2543341073001 38.0226905622357 42.4580504587581  
45.5869891570251 36.8059561571675 42.157627240486 41.5817737564592  
43.6434576713809 39.2809305246091 47.2299678280724 43.7585538437696  
42.357910063876

LOC650465 44.0328992213727 39.8695929627783 42.5406888281114  
42.8235313007746 43.9450023643394 47.0940613507321 46.4388841354122  
42.6450179841129 45.4799270968969 43.4885245598939 43.0016969050339  
44.2527566343661

LOC650468 41.2424637338424 37.2810767789306 40.5734458834617  
38.4208429103799 39.6535880152834 40.244271403831 38.4005795891396  
41.5464765641928 36.4476883897928 35.195364621675 41.0808257270221  
38.0452862258803

LOC650475 41.0608773166058 53.812632592983 42.3536549114165  
43.3078542962968 41.1868052124344 41.3553369544097 41.8315602975157  
40.931294690669 42.6366765186182 42.0621425894624 44.7114813656401  
40.6614700944853

LOC650482 40.148780650831 37.10170285405 44.2405728317107  
35.6928955245309 44.0451487108213 39.7394181011603 34.806104801006  
43.844855336215 34.6720534245631 47.2299678280724 40.4504608195666  
40.9683275553869

LOC650488 32.406093465115 33.4316681623175 36.6522278218553  
36.1562979552173 36.4434672195785 37.9951997351435 41.4742337714895  
34.3865306339645 36.5393857306744 35.0082729554459 34.6366195121669  
34.6720534245631

LOC650491 44.9896851005259 36.0366673493555 36.6522278218553  
32.9046688061235 36.9060997041453 33.1602385985469 30.561906108551  
37.33030683349 36.6312676076142 33.1559412791294 35.9563099719284  
39.9519547348106

LOC650494 52.502055890816 43.0227387991135 45.7968648044613  
42.2496337895968 42.269054475455 53.0290605707162 44.2166118829877  
40.831207953647 41.4636047919453 42.6793753550854 37.3687900733549  
44.4475838947656

LOC650496 34.6977013306396 38.3322849790657 41.6977706798234  
48.4916117779992 44.6834648302383 38.3418933808844 44.6032218589199  
45.3872406432794 39.5806465938526 44.1379638573455 41.8168470823451  
41.1554481567603

LOC650498 45.9090659324223 45.1694246393676 38.9790184198145  
47.0874209746031 47.6884372645373 40.3357777530419 38.1793598983615  
42.9301944191913 34.4716904283753 46.7646877499666 39.9899430628542  
43.0930293831497

LOC650509 39.5676051939342 49.3581578587582 44.2405728317107  
38.745552403895 41.467005949568 44.0804700754786 46.3057385979341  
41.6466169548846 43.6670755115848 47.4767851750188 48.6184776976167  
46.0633179231318

LOC650517 43.2292420244198 49.0048900199083 62.8534105935806  
41.7233690251839 52.5098795466615 39.4600924554505 46.9185175407863  
63.4176152858138 84.8084949516218 40.65801481675 39.9070785037411  
42.6758568421347

LOC650518 808.857027942253 849.412637017524 1055.35144552575  
1279.02702402372 659.126408705362 658.282562295783 1194.10154988793



1151.25293766167 1161.71671016964 835.171475474151 725.680256063016  
889.638287212686  
LOC650520 39.1590964332473 40.8880530359822 36.5474283500601  
38.9534635879195 39.4693871570028 39.8455060654531 38.5066108855005  
38.4540849632254 31.7734183346363 35.7202909649682 32.775958132716  
37.1747156131306  
LOC650526 55.8218917166321 44.7829632472754 51.9214790114499  
43.3078542962968 50.8875036861067 43.5752393599169 45.8980298854198  
49.9332280449549 50.2223403889892 45.3530683538086 47.6125796208753  
42.9887069977696  
LOC650528 46.8141313516997 40.9731067463382 41.437237454134  
46.614092935749 41.8806343997257 39.3841861812262 40.5585676679482  
41.5464765641928 42.9020321355927 39.8873706855774 42.6366765186182  
40.9683275553869  
LOC650534 40.7609952437622 36.4002279956519 36.3604951341921  
39.5050383901884 39.7568367479301 41.6590564937735 40.3302268293707  
39.4710743516517 38.3418933808844 44.571915452417 37.2892641289258  
41.9430737035925  
LOC650538 42.0532901689036 39.8695929627783 40.1985790927248  
43.4410741327254 44.9936360641969 39.2248354955045 42.4939802311136  
45.2806199505029 36.7267557061938 46.0119912782855 40.1742127891824  
40.0557788909923  
LOC650543 40.148780650831 35.9305494063137 38.4043916290561  
35.7674462337723 35.3327761997046 35.5158505219112 40.6750540874299  
39.4710743516517 38.2215591930186 39.8873706855774 37.2892641289258  
37.5556299264699  
LOC650546 46.3940502929193 42.281606728072 48.170173274889  
72.6824533717231 43.7828659616842 50.2163892855092 51.4349390827895  
45.7476095696859 43.7630587657205 43.0290260867894 45.9845892801751  
44.1452943804044  
LOC650548 35.3227485563945 40.716553247236 35.6139301508335  
37.1894304543751 37.3508690072156 37.9003288112261 38.941855825269  
42.8482181313226 39.5806465938526 37.920964499903 43.4709415392696  
44.3521099857368  
LOC650549 41.8409927585705 44.5152708955623 43.9450023643394  
45.4634652319753 43.9450023643394 39.8455060654531 44.6032218589199  
41.2551966132486 42.6366765186182 40.1179210534118 47.5439485437351  
42.2577689927563  
LOC650553 43.7585538437696 40.148780650831 41.3366779545815  
37.29566077996 42.0709558258414 37.2686490268265 40.0052661202207  
42.357910063876 42.9020321355927 33.4316681623175 40.6373400186325  
37.7526485343328  
LOC650556 40.7609952437622 39.9697332660833 45.4865173433646  
45.334106390212 44.3557408297309 38.6414316877471 43.1931731665131  
44.797320243931 45.2897806651929 47.2299678280724 44.553780984244  
39.2469742642337  
LOC650557 42.7150227340364 38.6704566269103 38.6005272730664  
59.6153684374766 40.4166536885831 41.408887993053 40.5585676679482  
46.3685439301234 41.6616444147804 41.2276963324981 41.3945375181463  
43.7410507935043  
LOC650562 39.7576136507593 40.9731067463382 47.0055981216687  
38.3166554965434 37.956732373465 39.8455060654531 38.4005795891396  
33.4534810696886 41.6616444147804 36.9102644736882 38.4689132737495  
45.8546719310325

LOC650566 40.7609952437622 39.0894172982439 39.991353369336  
33.8111782249716 43.6587492470348 41.2567470068038 33.5578650644246  
37.7612949798895 36.0741672064298 37.920964499903 39.9899430628542  
37.0953622406687

LOC650568 38.2083710281545 33.939263369489 39.4710743516517  
38.2041059863839 33.3231576795423 48.260931742163 36.5352572191451  
36.6452480995946 38.6322728994674 43.1839109702714 44.2925355984056  
39.7411455670172

LOC650577 40.7609952437622 37.7384958256497 38.7745734037492  
38.9534635879195 39.6535880152834 37.7000400506818 41.706879587091  
39.853866204927 35.860430241131 40.8970401536578 38.2795150354677  
39.1553169409075

LOC650580 44.5282181324797 51.8610060995363 49.2041300973417  
45.4634652319753 58.4383854340181 51.6053353177789 49.540449125788  
49.6203214143464 44.1519466943185 46.1390887492649 53.2083147523758  
49.9692385479389

LOC650584 42.2455707947223 42.9358255168086 40.8420925848403  
37.1894304543751 43.004943518025 45.8325181856483 42.4939802311136  
43.6434576713809 43.4656637536244 45.1569741609597 41.9083581529276  
42.6758568421347

LOC650594 41.6354649482853 42.2577689927563 42.8270038153139  
42.357910063876 42.4864576619427 41.9543948167375 42.2577689927563  
41.3506832276112 54.7033747046992 41.1222709786153 43.3085358214154  
43.0930293831497

LOC650599 38.385865183581 46.2286164776607 31.5151915411476  
36.264823544143 39.3667161654772 46.263826584899 40.4359177791566  
38.8495095797881 40.137818555383 41.7405682794166 37.9230440150891  
37.0953622406687

LOC650611 47.3791873993182 40.4359177791566 36.3604951341921  
42.0102671859606 34.1686574241133 38.6414316877471 52.2476631126873  
40.6171774724171 40.2274522635576 42.785429206422 45.1432412071268  
46.3411353377615

LOC650612 43.0930293831497 34.2618170189676 40.0998167098057  
36.5393857306744 32.771863438151 42.5660695551615 41.5817737564592  
37.86982638952 34.6720534245631 38.6454098044474 37.9946685306274  
35.4484652445078

LOC650620 55.5276281380084 44.5152708955623 44.8872784170036  
54.8412943008635 46.1804647841331 43.1826328292558 48.4859552186772  
49.8344973836834 51.5229124652769 48.7414853386615 39.2542963855807  
45.7562276914441

LOC650628 41.1523487516364 41.2598458726002 38.5045333213784  
35.3829784221072 37.956732373465 42.157627240486 36.08956004634  
43.7396619462033 34.1294694030979 41.2276963324981 37.2018803984555  
37.2810767789306

LOC650631 40.0557788909923 39.5050383901884 36.9795961564828  
36.6501141438378 42.6022652963326 35.9305494063137 39.8695929627783  
41.5464765641928 40.9901805728485 38.528621456378 40.6373400186325  
42.1537476443423

LOC650632 38.304249186058 41.2598458726002 41.9666541498638  
46.0228732507872 40.5710637884029 37.0180934800573 43.5627649099623  
39.3709357615493 48.8842909466002 42.8936990772838 39.0550139257658  
39.9519547348106

LOC650634 42.6036491382658 40.0527893189096 45.063792968927  
53.9517841438975 44.9936360641969 45.2852528185486 37.2892641289258

47.4740726032707 36.0741672064298 41.3321861371202 43.6629145624937  
41.5536168238478  
LOC650638 40.9558083259517 40.2493681589104 34.2890785915814  
42.5664883002833 39.6535880152834 43.3785777889265 42.8684958525042  
47.8947595316832 42.357910063876 44.1379638573455 40.1742127891824  
40.7704587752083  
LOC650646 1925.20977162704 5047.91205452316 3282.4852236415  
1127.96214301065 1511.33844030783 3428.74022048394 1445.73674428909  
6309.53691418065 4368.11345948444 3263.05269150231 1086.12171444149  
1208.33498233518  
LOC650651 39.3709357615493 40.716553247236 39.8299340037009  
40.4359177791566 45.2556760873335 43.4681646416585 41.1507980856436  
37.86982638952 45.0997987980157 33.6902293666089 45.9104478407175  
37.9607839934735  
LOC650656 38.6454098044474 39.2907645923217 40.5734458834617  
45.334106390212 43.2484996523549 45.2852528185486 42.357910063876  
41.0381860307445 47.7086093893038 44.1379638573455 40.8225507267584  
41.5536168238478  
LOC650657 38.5007204246293 39.0894172982439 40.4882741869718  
34.5425384901279 40.148780650831 32.2133093774284 40.5585676679482  
43.4544762830742 39.0775870687758 46.8954576545929 38.745552403895  
41.3481355128089  
LOC650659 45.0985088502363 38.9338521051669 41.785676764591  
38.745552403895 39.9697332660833 39.9397419279057 40.9157352260901  
36.0306975524309 43.5669306063196 40.8049408996274 37.0180934800573  
35.7451401627836  
LOC650668 40.5654775358427 42.1607322031054 40.4070046183108  
41.4273122914951 40.2449343247539 37.7000400506818 40.3302268293707  
35.6825474397235 43.2761454096265 43.6033221838149 42.911855821602  
38.5279745308203  
LOC650673 40.8681871019812 41.0678614026819 42.5406888281114  
42.8235313007746 45.5809132232681 45.7300501624017 45.7452456977857  
42.2577689927563 41.863927676552 48.6124127998952 43.0016969050339  
45.7562276914441  
LOC650677 46.3810615657263 42.3647968647967 40.3452320167286  
41.1886975241176 42.0709558258414 42.4263859458031 44.0687697278114  
40.1474543172332 43.515290338756 44.6360645306497 42.1516028411593  
39.2469742642337  
LOC650678 35.8208542506595 37.2810767789306 39.8299340037009  
35.2143190355414 41.2740822675592 38.6414316877471 41.706879587091  
35.7973685350741 41.074824727477 38.745552403895 44.1148826235374  
43.5738557773903  
LOC650680 36.9060997041453 44.7829632472754 45.5883690965192  
45.334106390212 38.745552403895 46.7800033479223 53.7423898357583  
40.931294690669 37.0126425326534 46.325232414659 40.547835538778  
43.8575940017119  
LOC650681 39.3709357615493 45.2556760873335 34.6977013306396  
40.9607305725196 39.7568367479301 38.5252456306656 41.4742337714895  
35.4526946152955 39.4762546236449 35.0082729554459 40.723990462047  
45.0985088502363  
LOC650683 41.9407041937973 44.5152708955623 47.7737810047679  
41.5464765641928 46.3150221024046 39.0266821712099 49.540449125788  
43.844855336215 46.4164127487052 59.4309046716701 48.042366934301  
47.6040671292013

LOC650684 38.2083710281545 39.6123051184545 41.528370959196  
41.4273122914951 40.6723334103791 39.6251842352088 37.1643693306382  
42.357910063876 39.9444191873552 39.2623423164488 43.3085358214154  
40.4639532172338

LOC650687 40.6559419616644 35.4484652445078 40.4882741869718  
47.9915414951747 43.3332476888305 36.2768299545794 38.2933870238743  
35.9023742468744 33.9456837661864 40.5090849993014 37.5583886316038  
36.1647506311964

LOC650689 50.8388984085636 43.0227387991135 50.5089777244781  
47.481302504066 43.4544762830742 48.7781962164988 47.8947595316832  
43.7396619462033 49.9951674107458 43.6033221838149 40.1742127891824  
45.1735152121056

LOC650695 45.6517320730042 38.1312950900467 43.0971787292711  
41.5464765641928 49.32293280121 49.5424425850549 43.3262148375525  
41.7419877611072 34.5633623842083 46.6598879466655 56.8436081694537  
35.6427313468066

LOC650698 37.1485601150873 47.765848710116 47.2055133646385  
44.265834798964 42.1650127805175 38.1169703906207 40.3302268293707  
46.2779564481158 42.8036731479932 40.4136535208406 42.6366765186182  
42.57175366709

LOC650706 40.4639532172338 40.6380495994768 41.1367478979484  
34.5425384901279 39.6535880152834 39.6251842352088 44.6032218589199  
41.4508241771315 34.6720534245631 37.2089297656361 41.8168470823451  
36.5474283500601

LOC650708 43.4626049853157 43.4396866157171 47.5673419710251  
41.5464765641928 44.3557408297309 42.2577689927563 42.0605906240248  
46.9986083378817 44.4395580493118 43.1839109702714 46.2560238004757  
43.6753843488695

LOC650712 37.3463875295726 40.716553247236 44.4311655729487  
35.6027791404152 39.6535880152834 40.3357777530419 40.3302268293707  
42.9301944191913 38.9006788676407 36.3612409063792 38.6662194645633  
40.7704587752083

LOC650713 40.7609952437622 43.4396866157171 41.0356368374708  
48.4916117779992 40.3452320167286 46.4648868771662 42.0605906240248  
43.6434576713809 42.8036731479932 41.5435611403119 43.844855336215  
42.4607795638552

LOC650716 46.5549623118323 45.6533175604486 42.7303139017786  
50.0526763693329 48.8381507187986 44.0804700754786 47.1345949868029  
45.4757965005055 40.6957787921451 37.6383530120621 42.357910063876  
45.2783024981315

LOC650717 43.844855336215 45.9266745571724 49.5424425850549  
58.3475983630509 47.9128504683618 44.8872784170036 45.7452456977857  
40.831207953647 48.2123120250343 40.4136535208406 45.390192977585  
44.5432192783161

LOC650721 46.9939712192224 45.4882438975269 38.3166554965434  
42.0102671859606 45.8051846088552 41.554942319225 41.253645578517  
46.4672637826582 42.992884918158 44.6918600441328 43.401782064778  
41.9430737035925

LOC650724 44.9896851005259 40.2493681589104 36.3604951341921  
56.9299697426319 39.0564222526273 39.0266821712099 36.197424053556  
39.853866204927 41.1742244762318 41.9666541498638 40.6373400186325  
39.8497227447888

LOC650733 42.9104454767916 38.7344853699576 40.6737160001291  
41.6564075217517 39.859345745831 42.157627240486 40.7910160811527

40.6171774724171 34.7722083264266 37.3179578037963 40.2649309204478  
35.5523662009011  
LOC650737 52.2759825608835 57.1595768494068 57.2960245538881  
62.8201270538435 59.0965219753805 57.4151953663881 69.4677195088043  
46.2779564481158 54.7033747046992 60.8250302910721 66.6320017520888  
71.7937709257351  
LOC650739 41.9407041937973 41.4223563635976 44.1452943804044  
44.6131679221578 42.8510579683751 46.1513019317765 42.0605906240248  
48.87875862356 44.476519804187 42.5664883002833 44.553780984244  
46.6681271693877  
LOC650744 38.304249186058 43.0971787292711 37.9482157381008  
49.5424425850549 37.6527901109005 39.8455060654531 38.8417151851134  
30.7606118575469 39.5806465938526 38.957687788868 42.5426057453993  
43.4709415392696  
LOC650749 41.7397731376692 37.8217989841918 39.6451483836089  
43.074472921841 36.4434672195785 44.6524308640784 40.3302268293707  
37.2237132058632 36.8127605061228 42.5664883002833 41.0050831223107  
40.2669497398702  
LOC650751 36.3649677956953 43.2649781354792 41.6977706798234  
38.9534635879195 44.147557390293 38.3418933808844 39.4600924554505  
38.4540849632254 39.5806465938526 41.1222709786153 36.3390947880186  
38.9496515344837  
LOC650755 43.4626049853157 34.5023764006976 35.0970060242246  
40.3180310664156 41.3755760434934 35.0970060242246 36.7356360093603  
36.1375121409002 38.8271346375425 37.5343260962758 45.1432412071268  
38.745552403895  
LOC650757 46.5549623118323 41.8073910693411 50.2869791217819  
56.4578213622965 46.0043807840705 50.7516773099639 57.8870110456492  
48.0582855095143 42.2577689927563 48.8623729374733 47.4630625313159  
40.5703581862752  
LOC650759 45.3872406432794 39.6123051184545 43.1931731665131  
46.614092935749 40.5710637884029 45.4882438975269 42.8684958525042  
47.0940613507321 47.0804681460898 48.7414853386615 48.042366934301  
43.7672102682067  
LOC650761 41.8409927585705 44.1239711172417 40.7620472083159  
38.4208429103799 38.9496515344837 42.750861693377 43.5627649099623  
41.0381860307445 41.4636047919453 42.5664883002833 42.5426057453993  
44.1452943804044  
LOC650767 44.8914371498528 36.7976562409506 46.4569566520107  
49.3654837541353 42.9090346219023 46.4648868771662 41.706879587091  
49.8344973836834 43.3744503319109 48.3693338695392 40.1742127891824  
42.6758568421347  
LOC650770 45.5758521267508 40.9731067463382 40.1985790927248  
42.6913548400127 34.4570158133896 34.9849896310235 40.1235656101329  
39.7509165247419 43.0930293831497 39.0648733099061 40.3452320167286  
44.8372404608604  
LOC650771 42.0532901689036 38.0226905622357 43.401782064778  
39.2780515621926 41.8806343997257 37.3799542961839 42.357910063876  
37.86982638952 36.7267557061938 39.6719190054379 33.6902293666089  
41.4508241771315  
LOC650776 40.6559419616644 38.7344853699576 34.4716904283753  
40.7481155008596 38.0598374201407 42.0574848021044 45.1017494688414  
44.1311654985682 40.2274522635576 40.1179210534118 33.8558232866797  
35.6427313468066

LOC650780 41.8409927585705 48.8584917918986 45.2313723727673  
43.8002456102021 39.9697332660833 46.0364000143537 55.4004611309636  
45.7476095696859 52.4539007817929 48.0211752672327 42.4580504587581  
44.9070250604284

LOC650781 44.8914371498528 42.6022652963326 39.991353369336  
40.3180310664156 39.3667161654772 41.159706131351 49.1067959632109  
36.8400213077707 42.1594905198929 45.4614234442527 46.4753015651202  
40.9683275553869

LOC650787 42.6036491382658 40.9731067463382 41.9666541498638  
39.6292788039793 40.6723334103791 44.3648993568405 37.4772922422734  
41.0381860307445 37.6383530120621 41.1222709786153 43.1931731665131  
39.1553169409075

LOC650788 38.8561375693335 39.8695929627783 53.9612654850046  
33.6816578730693 31.5599106749655 39.6251842352088 39.1539892144371  
34.806104801006 40.9901805728485 44.0409178714232 39.0550139257658  
39.3575468494941

LOC650794 43.2724556187214 43.3016395799961 42.4580504587581  
46.8954576545929 39.2968590261598 42.8598805316863 41.3094485574845  
42.2577689927563 40.8970401536578 42.4393920571519 40.8681871019812  
40.4261913313642

LOC650795 43.1805016690297 44.9370339275041 46.7508829977587  
49.5424425850549 43.004943518025 39.0266821712099 50.2016912396771  
43.2551508830106 40.8970401536578 44.571915452417 43.0971787292711  
36.6603338274678

LOC650796 53.0290605707162 51.3084273211359 40.7620472083159  
41.4273122914951 38.1644569189523 40.1428591998404 37.1643693306382  
44.9977782988116 40.4220196471124 40.4136535208406 46.7386599624801  
45.3763275588341

LOC650799 40.148780650831 42.3550738181144 47.646800205189  
44.7980740332174 45.8051846088552 42.357910063876 43.6753843488695  
40.6171774724171 41.863927676552 41.6373771565199 44.9713479185144  
45.5800840647989

LOC650803 46.0920218698606 49.83247261979 44.7829632472754  
39.9697332660833 39.9697332660833 48.7781962164988 41.8315602975157  
44.4031868028216 41.5635499110307 37.7315666632629 40.4504608195666  
46.2625470410195

LOC650804 39.0620487644635 41.2598458726002 36.1042012504758  
43.4410741327254 43.4544762830742 39.3841861812262 40.0052661202207  
44.8997235283254 38.9006788676407 41.2276963324981 41.7272875295469  
41.4508241771315

LOC650810 41.6354649482853 40.6380495994768 47.7737810047679  
38.4208429103799 44.5668141895992 46.6872654833579 38.1793598983615  
49.5185112777773 48.4869909888679 36.4651112441576 39.0550139257658  
40.5703581862752

LOC650812 31.6557652929457 37.10170285405 38.6005272730664  
39.5050383901884 35.3327761997046 42.9695585740813 36.8369172900902  
35.9023742468744 33.5578650644246 33.8984830800739 35.860430241131  
35.4484652445078

LOC650815 37.2474303302343 38.2263227947189 40.8420925848403  
38.4208429103799 43.3332476888305 39.6251842352088 38.1793598983615  
39.4710743516517 40.5912213523345 41.0057887014368 41.6336636285875  
31.372171135652

LOC650822 42.442231667357 41.9894412416874 43.8495248991589  
40.4359177791566 41.9842695818285 40.1428591998404 41.4742337714895

45.2806199505029 48.1174861108648 45.2556760873335 44.7114813656401  
42.8864415494484  
LOC650823 45.0985088502363 35.8227939208521 40.8420925848403  
44.0451487108213 42.0709558258414 43.2805590023412 44.6032218589199  
42.157627240486 45.6582729799009 46.5650556481721 43.3085358214154  
44.1452943804044  
LOC650826 58.0139597055449 89.0898346470643 69.4967762263181  
53.593974682612 96.8490167966217 71.7021670182761 134.796819654047  
67.0904616289706 81.552417816742 56.685925255591 63.5195937348531  
72.5346469941833  
LOC650830 40.8681871019812 48.6447083765118 48.2883694323339  
47.481302504066 42.7107928951766 42.5660695551615 46.0228732507872  
49.2019743609873 45.1899271235974 40.4136535208406 43.9450023643394  
44.2527566343661  
LOC650831 49.1868644496737 38.0226905622357 38.6727842796202  
37.29566077996 36.5393857306744 36.2768299545794 43.8206425661746  
36.3405039629059 35.860430241131 43.401782064778 39.3667161654772  
34.3409660445447  
LOC650832 328.908952548641 331.935072199058 298.14782785085  
488.908231529696 256.766675299448 169.99300253813 400.093769705765  
604.357590751951 214.369365247268 292.389429869034 334.349204174886  
290.174315362911  
LOC650836 34.0467249875782 38.9338521051669 38.7745734037492  
40.5484717678957 37.6527901109005 37.5887129572848 36.4098694708483  
34.4896350146096 37.1820543575123 38.8507804383261 40.0766543123257  
39.2469742642337  
LOC650840 47.2862299990938 44.5884811528117 40.6737160001291  
45.1944222548351 43.2484996523549 39.8455060654531 44.4639405506967  
36.2539950294089 42.9020321355927 40.3235655331796 45.2265319826548  
47.7962548556026  
LOC650841 40.2543341073001 41.2598458726002 40.0998167098057  
42.0102671859606 49.32293280121 42.750861693377 43.3262148375525  
42.0494116081998 38.3418933808844 46.8954576545929 37.6484782516569  
43.0930293831497  
LOC650843 34.4021554788966 43.9421822132391 37.0642268327439  
44.7980740332174 46.0043807840705 45.1873487463472 38.941855825269  
39.853866204927 38.8271346375425 39.2623423164488 43.5710871617107  
39.9519547348106  
LOC650845 45.6517320730042 48.9259041798949 50.9933795450314  
55.4180794172794 49.0828761839116 49.3172204533818 53.7423898357583  
50.1833483241864 54.8946088631931 51.7594352155304 49.7363778831003  
48.7814131120945  
LOC650846 43.0930293831497 41.7337506166619 43.0971787292711  
44.550322123994 42.7982502551634 44.3648993568405 54.339958888486  
39.6474008369935 46.2027193115397 45.7911932481722 45.5707650534259  
43.8575940017119  
LOC650849 40.4639532172338 39.6123051184545 44.9758339877851  
42.5664883002833 37.956732373465 46.4648868771662 46.1634822993009  
44.6107027295193 41.2870505273664 41.5435611403119 42.170702295259  
37.8490162439785  
LOC650850 43.7585538437696 46.4861258030402 44.6032218589199  
43.5627649099623 48.2748123114598 45.0882356578404 51.0013344286851  
40.1474543172332 40.4220196471124 48.3693338695392 42.911855821602  
42.4607795638552

LOC650851 46.5549623118323 46.0023068797812 41.1367478979484  
40.1804147506786 39.2608760193011 44.6524308640784 42.1607322031054  
42.7431359850339 42.5406888281114 39.8873706855774 42.5426057453993  
36.1647506311964

LOC650852 45.0985088502363 43.1805016690297 42.2577689927563  
41.8778873678551 45.8051846088552 43.9724628401189 42.2577689927563  
41.5464765641928 41.1742244762318 42.785429206422 45.5707650534259  
44.6484005362281

LOC650853 43.2724556187214 40.3384318592985 39.5450079747895  
40.9607305725196 46.9906120932727 41.554942319225 44.8643898647322  
40.7311497914871 41.1742244762318 45.1569741609597 50.4740079109854  
42.57175366709

LOC650861 42.8036731479932 40.4359177791566 41.9666541498638  
41.8778873678551 36.5393857306744 39.4953494583071 35.6056062164318  
37.9837233601316 40.2274522635576 41.8613406887824 37.1059647239814  
35.3525469364579

LOC650862 39.6609238036815 34.5023764006976 39.6451483836089  
42.9358255168086 35.6434124419782 38.4330755397458 39.3585350448719  
41.6466169548846 34.2973261206803 41.5435611403119 40.547835538778  
36.9976231206067

LOC650867 41.5421429082231 45.3486182278177 39.7411455670172  
43.5627649099623 38.4540849632254 37.3799542961839 42.2577689927563  
40.931294690669 43.6670755115848 38.4187686307607 44.4688999098904  
44.3521099857368

LOC650869 36.8072833828297 40.6380495994768 35.5220586859301  
40.3180310664156 40.148780650831 40.1428591998404 45.4799270968969  
30.4430902995779 36.9060997041453 36.2435874904689 36.8282383070068  
35.5523662009011

LOC650874 41.8409927585705 43.0227387991135 50.5089777244781  
45.334106390212 51.1368583672022 42.9695585740813 46.5650556481721  
46.695848687694 44.4395580493118 43.4885245598939 41.9908237694988  
50.8999542937724

LOC650879 42.442231667357 36.4002279956519 35.5220586859301  
38.9534635879195 43.3332476888305 41.2567470068038 41.3594868055879  
40.6171774724171 40.6957787921451 35.6208308220005 46.6442692119997  
39.3575468494941

LOC650881 46.0023068797812 44.4411734611229 44.9758339877851  
41.8778873678551 36.7356360093603 41.9543948167375 43.9450023643394  
43.1567024035183 44.8997235283254 42.785429206422 45.9104478407175  
46.6397391251762

LOC650883 42.0532901689036 43.4396866157171 54.3554233228353  
54.2886483704949 40.3452320167286 38.2293008890613 41.9393838138203  
39.853866204927 47.1744296124496 39.6719190054379 43.9450023643394  
39.0536056496869

LOC650885 47.4678477186801 40.2493681589104 45.3974838013476  
39.1706564265495 44.8897737954573 45.7300501624017 44.6032218589199  
43.9366081640576 44.8997235283254 41.2276963324981 41.0808257270221  
46.2625470410195

LOC650887 37.55264801907 42.6022652963326 35.4484652445078  
38.2041059863839 41.6806984441849 33.1602385985469 36.08956004634  
45.1714698794331 44.0519245668737 45.6868589181768 39.9899430628542  
41.2437378488025

LOC650889 42.8036731479932 48.2220547806679 38.0452862258803  
46.0228732507872 40.4639532172338 43.4681646416585 50.0088611244948



43.9366081640576 38.8271346375425 44.7958122466628 45.8180710486329  
45.0035308952466  
LOC650898 42.8036731479932 48.3077814647455 43.0016969050339  
37.5382094267692 54.5683518971261 46.263826584899 43.6753843488695  
43.844855336215 38.4344387289956 46.5650556481721 39.4410515050885  
38.5279745308203  
LOC650905 43.3638918705225 39.6995529770239 39.991353369336  
40.0698728584484 41.5668884168669 40.4359177791566 41.9393838138203  
37.0390589468421 37.6383530120621 35.3849221682845 39.2542963855807  
40.3691324547049  
LOC650909 53.0596635022268 66.4300949831964 86.1924491308234  
56.2508140932179 74.3523005665671 48.6621527194963 52.3242437351389  
51.555506218204 66.9119713241466 50.5734308316823 49.0361180089431  
55.4142784938271  
LOC650914 34.5886782974123 34.5023764006976 35.8265993915844  
35.0448343468967 36.2048942610546 33.7818132446042 37.4772922422734  
41.1575777497576 30.8360322325222 41.4397539024976 37.9946685306274  
34.6720534245631  
LOC650919 50.2203578628217 49.9085372049438 45.1569741609597  
56.0794100106654 46.8674366115656 50.7516773099639 44.4639405506967  
45.7476095696859 42.5406888281114 45.7911932481722 44.2925355984056  
44.5432192783161  
LOC650921 34.0467249875782 36.1232327599945 35.6139301508335  
42.6913548400127 46.6397391251762 39.2985791324641 41.706879587091  
39.6474008369935 42.1594905198929 41.9666541498638 43.4709415392696  
40.2669497398702  
LOC650922 35.7012997405508 30.4639019828888 42.8270038153139  
35.1451084093692 38.9496515344837 34.6977013306396 28.6786952763294  
39.0620487644635 34.4716904283753 37.6383530120621 37.4642807402741  
34.806104801006  
LOC650924 41.4508241771315 46.9919960628953 46.0727230219512  
43.1847628331565 42.269054475455 41.0582900711341 43.8206425661746  
49.2901038327894 39.0775870687758 43.4885245598939 43.6629145624937  
46.917149434588  
LOC650930 38.957687788868 45.0905928998779 42.2577689927563  
34.9221408381038 41.1868052124344 41.554942319225 36.4098694708483  
38.956280281655 43.5669306063196 37.4302011516587 44.3763859390287  
41.3481355128089  
LOC650933 45.9090659324223 41.8848959280916 45.1569741609597  
47.6687908290818 44.9936360641969 43.4681646416585 40.9157352260901  
45.5581356216957 45.9227107476843 38.2069499294002 44.7114813656401  
43.6753843488695  
LOC650938 40.9558083259517 42.7775752471711 40.931294690669  
43.9282059368202 41.6806984441849 44.0804700754786 38.941855825269  
41.2551966132486 48.8842909466002 42.1622837416589 44.7926323492519  
47.1060577218993  
LOC650942 37.2474303302343 39.8695929627783 38.1421709520616  
42.9358255168086 40.8873907150245 36.8059561571675 44.4639405506967  
39.4710743516517 35.7973685350741 36.9102644736882 38.3684202018524  
36.6603338274678  
LOC650943 46.263826584899 46.6996902348633 47.4740726032707  
46.3203995372658 49.8304479381623 41.0582900711341 43.4544762830742  
44.1311654985682 41.6616444147804 43.2988017098387 40.9157352260901  
44.4475838947656

LOC650950 46.5549623118323 48.9259041798949 50.6987358483181  
51.5913529948887 57.8039717833131 41.159706131351 48.1747307200218  
47.3791873993182 45.9227107476843 41.2276963324981 39.2542963855807  
43.8575940017119

LOC650961 40.5654775358427 41.0678614026819 42.640829914102  
41.7614975630362 47.5647821785529 46.0364000143537 40.5585676679482  
45.0972184964705 42.5406888281114 40.1179210534118 40.0766543123257  
44.3521099857368

LOC650965 35.9305494063137 40.716553247236 35.2101597814352  
35.6928955245309 36.08956004634 35.5158505219112 34.3633615460307  
35.7973685350741 38.9006788676407 36.4651112441576 39.3667161654772  
37.5556299264699

LOC650968 38.957687788868 43.7644428186265 44.6032218589199  
46.3203995372658 48.5000946421718 43.9724628401189 43.5627649099623  
44.9977782988116 47.27543600687 44.8997235283254 42.6366765186182  
43.3744503319109

LOC650975 47.2862299990938 42.3550738181144 47.9035532886869  
45.1944222548351 39.0564222526273 45.6129956328415 38.7337086062875  
42.8482181313226 41.3803269429468 40.3235655331796 42.0750889188255  
41.5536168238478

LOC650976 44.436995101921 42.2577689927563 43.8495248991589  
44.0451487108213 41.8806343997257 45.9266745571724 43.3262148375525  
38.6454098044474 44.619512785899 37.4302011516587 38.079222289614  
45.9693232070002

LOC650977 41.4508241771315 40.9731067463382 39.8299340037009  
38.5252456306656 45.1137938810047 43.2805590023412 43.8206425661746  
42.157627240486 39.0775870687758 35.8304004211528 44.7114813656401  
40.6614700944853

LOC650985 48.8941062980393 41.8848959280916 45.2313723727673  
44.6905691366696 47.4548471240051 42.6575535390785 42.8684958525042  
42.5435283762933 42.0621425894624 51.2318935933116 42.170702295259  
37.5556299264699

LOC650990 44.3355304829989 40.2493681589104 39.0775870687758  
40.591923288644 41.0476065156912 45.7700386532539 44.0137388752186  
47.2009420656854 41.7627910693483 42.1317134987795 42.9634662926872  
41.0657892043496

LOC650995 38.7537364570873 36.1232327599945 31.8679959015659  
36.1562979552173 40.0599807618105 38.4330755397458 38.0598374201407  
37.0390589468421 33.9456837661864 34.1648535095605 31.6063174764616  
38.9496515344837

LOC651004 52.4179224871914 43.8495248991589 49.1067959632109  
43.6726153508978 43.5544347011646 39.7394181011603 45.8980298854198  
46.3685439301234 47.6195009345747 49.5265949137207 41.8168470823451  
48.1627097465883

LOC651006 37.6397652536077 42.5269793679335 41.2365089689635  
43.5627649099623 41.9842695818285 43.7630587657205 44.2166118829877  
44.0390019242862 41.863927676552 43.4885245598939 39.6403089864678  
40.3691324547049

LOC651007 48.9906383294199 41.4508241771315 43.0016969050339  
48.9944486068347 47.8075998240396 44.5544727111028 42.1607322031054  
44.9977782988116 47.5564423692142 45.1569741609597 46.2560238004757  
48.0350549043063

LOC651008 42.9104454767916 45.7979032939211 44.3344900481112  
43.074472921841 41.5668884168669 40.9506062495231 49.540449125788

47.4740726032707 44.1519466943185 45.4614234442527 41.9908237694988  
46.4499258373233  
LOC651012 37.0320432433314 41.9894412416874 42.0621425894624  
45.1944222548351 40.8873907150245 43.4681646416585 48.1747307200218  
40.931294690669 48.8842909466002 41.9666541498638 36.6298807161755  
40.8681871019812  
LOC651017 38.957687788868 42.2577689927563 32.5052327840481  
43.074472921841 40.148780650831 39.4953494583071 34.4570158133896  
34.5886782974123 36.197424053556 35.4990901121893 36.5359455830388  
34.6720534245631  
LOC651022 38.957687788868 40.3384318592985 40.4070046183108  
40.7481155008596 37.5556299264699 44.0804700754786 40.1235656101329  
35.5798430594271 37.4540772310118 38.2069499294002 36.131485826118  
40.3691324547049  
LOC651029 47.1962846565261 50.2696827764943 47.3861758958576  
56.2508140932179 49.0828761839116 44.8872784170036 45.7452456977857  
44.797320243931 47.5564423692142 46.7646877499666 45.4799270968969  
47.9566297250148  
LOC651031 37.7384958256497 30.8150126829901 38.0452862258803  
36.6501141438378 45.3675390992851 33.2552842693684 33.8558232866797  
30.7606118575469 34.6720534245631 38.957687788868 35.9563099719284  
33.8196020406676  
LOC651040 39.6609238036815 36.3110701990588 42.2577689927563  
40.646702696033 38.8456942580061 46.8954576545929 41.8315602975157  
44.0390019242862 35.2143190355414 42.2614524730856 37.2018803984555  
39.8497227447888  
LOC651044 36.1232327599945 35.8227939208521 37.3687900733549  
41.3027031037343 39.1650142708257 42.157627240486 38.4005795891396  
39.5466975353131 33.0463640202858 39.3698811593364 35.3362091871364  
39.9519547348106  
LOC651051 45.1912496459517 41.6466169548846 38.4043916290561  
51.3851157261451 40.148780650831 41.3553369544097 45.7452456977857  
46.9986083378817 51.2066664465185 41.2276963324981 39.8184668132023  
48.3648494350286  
LOC651055 42.1537476443423 46.29198852834 42.4580504587581  
39.6292788039793 44.4489662507893 42.9695585740813 44.4639405506967  
44.6107027295193 41.2870505273664 41.3321861371202 40.547835538778  
46.1592873342534  
LOC651059 43.6706764143908 39.3999056968598 47.9035532886869  
45.1944222548351 42.7982502551634 41.4508241771315 45.3597029614942  
37.1317006162938 38.2215591930186 43.844855336215 40.9157352260901  
39.4490233720848  
LOC651060 46.441301934328 46.4385386401326 51.3268475761593  
43.074472921841 46.8674366115656 42.9695585740813 42.7431359850339  
37.86982638952 47.7086093893038 48.6124127998952 45.8180710486329  
50.5511827666954  
LOC651062 40.0557788909923 41.9894412416874 38.7745734037492  
45.4634652319753 43.004943518025 45.0882356578404 45.4799270968969  
41.4508241771315 36.7267557061938 39.8873706855774 39.153226699662  
42.357910063876  
LOC651064 272.930242946726 275.928723831899 253.207750345072  
259.43283734195 369.717462266442 249.37112382902 358.979854534484  
265.320447667174 368.390023942835 194.60733564068 227.059460958349  
340.105993325165

LOC651065 41.9407041937973 41.159706131351 44.1452943804044  
42.2496337895968 40.6723334103791 41.9543948167375 42.4939802311136  
48.272324215504 37.5469247328848 44.1379638573455 41.1638563416981  
39.5418280570561

LOC651073 41.8409927585705 42.8542642792862 40.931294690669  
38.8495095797881 41.467005949568 44.1737502492846 44.0687697278114  
42.0494116081998 39.7537274655115 42.5664883002833 38.8507804383261  
43.5738557773903

LOC651075 40.0557788909923 49.2050538150106 50.3950981988762  
47.0874209746031 46.4343327861696 49.8472708021525 50.8388984085636  
46.5717043290731 48.1174861108648 46.441301934328 47.8988096575648  
42.7782216342806

LOC651079 40.9558083259517 41.2598458726002 39.6451483836089  
42.6913548400127 42.7982502551634 42.750861693377 31.9682164860619  
39.6474008369935 40.4997186069494 38.1042454705119 42.170702295259  
39.3575468494941

LOC651091 40.6559419616644 41.0678614026819 43.8495248991589  
43.9282059368202 44.2607789091176 35.4142595025086 41.0381860307445  
42.4580504587581 42.357910063876 44.7958122466628 43.844855336215  
41.3481355128089

LOC651096 38.385865183581 42.4493032770053 43.7630587657205  
42.0102671859606 39.3667161654772 42.9695585740813 41.3594868055879  
39.4710743516517 40.4220196471124 41.0057887014368 38.745552403895  
38.745552403895

LOC651100 42.9104454767916 43.0971787292711 45.4865173433646  
41.6564075217517 43.2484996523549 40.5281496800812 47.8947595316832  
38.2782436497441 43.7630587657205 45.1569741609597 44.3763859390287  
45.7562276914441

LOC651101 43.3638918705225 46.0713306971594 45.2313723727673  
51.949834638817 45.9104478407175 41.4508241771315 43.3262148375525  
45.0972184964705 47.798305839406 51.6778366958973 45.9104478407175  
42.9887069977696

LOC651102 40.4639532172338 37.4540772310118 37.9482157381008  
41.4273122914951 44.0451487108213 42.5660695551615 34.1889222434768  
43.9366081640576 42.1594905198929 37.0320432433314 37.8372168909583  
41.0657892043496

LOC651112 40.5654775358427 38.5252456306656 38.0452862258803  
37.1894304543751 40.148780650831 37.0180934800573 41.3594868055879  
37.6557714476853 41.1742244762318 37.7315666632629 40.3452320167286  
39.1553169409075

LOC651113 42.5193208629123 41.3610369241157 41.785676764591  
43.5627649099623 44.147557390293 44.2607789091176 40.3302268293707  
44.6107027295193 42.5406888281114 39.7835513496873 38.2795150354677  
44.2527566343661

LOC651115 43.3638918705225 40.4359177791566 40.6737160001291  
38.6414316877471 43.4544762830742 43.5752393599169 43.6753843488695  
39.1652965788406 38.8271346375425 39.4710743516517 36.7283081422707  
43.1805016690297

LOC651116 43.1805016690297 41.554942319225 43.0016969050339  
46.8954576545929 42.9090346219023 42.8598805316863 47.2927436772465  
43.3262148375525 46.3203995372658 39.9948390976317 43.5710871617107  
40.1700117452801

LOC651118 42.2455707947223 38.0226905622357 36.1042012504758  
39.853175885492 44.147557390293 47.2009420656854 40.0052661202207

42.2577689927563 34.226171989766 41.5435611403119 34.8383995317036  
44.4475838947656  
LOC651122 43.5710871617107 41.9894412416874 43.3085358214154  
40.3180310664156 47.6884372645373 46.263826584899 41.706879587091  
46.8954576545929 43.0930293831497 43.844855336215 47.5439485437351  
47.6040671292013  
LOC651123 37.4554876386402 38.5252456306656 37.9482157381008  
31.6357375926754 33.4316681623175 41.554942319225 40.9157352260901  
36.1375121409002 33.6902293666089 45.4614234442527 34.064698871541  
38.6454098044474  
LOC651125 40.4639532172338 40.716553247236 37.8386378737561  
47.6687908290818 40.7779767565889 43.5752393599169 38.6243997507646  
45.0972184964705 40.5912213523345 38.6454098044474 46.4753015651202  
41.1554481567603  
LOC651126 48.7646976789783 42.6022652963326 40.301483914446  
47.0874209746031 44.5668141895992 41.9543948167375 57.7805922926828  
46.8954576545929 49.1940901905636 44.571915452417 47.0940613507321  
43.7672102682067  
LOC651128 38.1169703906207 44.1239711172417 38.8775560911841  
42.4580504587581 39.9697332660833 44.2607789091176 46.4388841354122  
40.4359177791566 41.4636047919453 37.0320432433314 40.1742127891824  
39.0536056496869  
LOC651131 37.6397652536077 41.8073910693411 39.9101908547397  
38.5252456306656 35.0181575202066 38.9378717994178 45.3597029614942  
34.8949555140527 38.9834959368496 41.7405682794166 39.4410515050885  
43.8575940017119  
LOC651133 38.6454098044474 44.5884811528117 44.696023817801  
41.5464765641928 40.0599807618105 36.6996187567892 40.5585676679482  
38.6454098044474 42.4540072551568 40.4136535208406 41.9908237694988  
37.5556299264699  
LOC651137 40.2209794935386 46.4555908533915 43.0589430473426  
42.3019729951347 44.2166118829877 42.7093819243155 43.0398514059634  
39.6910816302609 38.5583217392131 38.957687788868 42.0750889188255  
41.3012916486748  
LOC651140 42.5193208629123 45.3486182278177 40.4070046183108  
49.7350276169552 43.6587492470348 44.4619248757502 45.3597029614942  
45.8669209716694 44.2607789091176 48.4890615340603 41.3553369544097  
44.7401523707775  
LOC651141 45.2875173643252 42.6022652963326 42.9104454767916  
41.4273122914951 44.6834648302383 37.8102105794655 41.706879587091  
39.5466975353131 41.3803269429468 39.3698811593364 38.079222289614  
38.5279745308203  
LOC651143 75.3761360028971 94.4501786945034 81.961632059749  
130.274451794636 80.5437011468815 73.8105012820769 74.2690269784394  
89.19837608959 91.0346886951891 53.6429962450784 58.2941346100716  
100.049462976601  
LOC651149 182.411383422586 358.779372054826 380.541502795438  
207.928770428477 305.119894105297 660.295993198711 319.408264906288  
217.875223856197 207.833867050257 211.485592971588 268.54298415337  
460.865101118125  
LOC651150 49.1868644496737 44.5884811528117 44.6032218589199  
45.7397504535169 41.2740822675592 39.9397419279057 43.1931731665131  
45.642304356051 43.5669306063196 40.4136535208406 43.844855336215  
48.27609330316

LOC651158 43.7585538437696 37.2810767789306 39.0775870687758  
42.0102671859606 29.0303154053123 39.9397419279057 35.3362091871364  
41.5464765641928 39.0775870687758 39.9948390976317 37.2892641289258  
36.8690774823319

LOC651166 51.5888395924843 46.8954576545929 50.9933795450314  
61.5515639412892 53.8260140375214 50.9724155054821 45.6042625176633  
50.3972033014227 46.4164127487052 47.7180816682562 46.8954576545929  
45.8546719310325

LOC651167 44.1294459089314 44.4411734611229 42.3536549114165  
38.2041059863839 36.6354013629791 43.4681646416585 43.9450023643394  
46.2779564481158 39.0775870687758 42.9866214102525 41.3553369544097  
40.7704587752083

LOC651169 38.957687788868 43.0971787292711 40.1985790927248  
40.3180310664156 42.3685136297603 39.9397419279057 40.9157352260901  
40.831207953647 41.074824727477 40.5090849993014 39.5399188536544  
43.3744503319109

LOC651175 37.55264801907 38.5252456306656 36.769073068743  
40.4359177791566 40.5710637884029 39.2248354955045 47.1345949868029  
42.9301944191913 39.6609238036815 48.1392888470269 39.9070785037411  
39.0536056496869

LOC651177 40.0557788909923 40.2493681589104 38.1421709520616  
35.6027791404152 36.9702228618069 38.6414316877471 33.1392460259336  
37.33030683349 43.3744503319109 40.7063426028871 40.6373400186325  
37.9607839934735

LOC651186 41.1523487516364 36.5219488315447 43.6670755115848  
37.0732977341185 38.5512429290626 43.9724628401189 44.4639405506967  
39.6474008369935 37.9273653326866 41.5435611403119 42.0750889188255  
43.5738557773903

LOC651189 33.2552842693684 34.3715326040967 40.5734458834617  
39.3750969348308 36.7356360093603 31.5556621809114 36.5352572191451  
35.1738399826814 35.5220586859301 40.3235655331796 38.8507804383261  
38.9496515344837

LOC651192 43.0001432913058 30.8150126829901 40.0998167098057  
39.6292788039793 40.148780650831 37.1317006162938 43.1931731665131  
41.2551966132486 39.0775870687758 33.6902293666089 40.9157352260901  
39.9519547348106

LOC651195 38.957687788868 46.4385386401326 45.7968648044613  
46.7577982595088 41.3755760434934 41.9543948167375 40.7910160811527  
41.9315419791594 41.9635525160083 40.5090849993014 41.2598458726002  
49.3984571719129

LOC651196 46.0920218698606 41.159706131351 43.6670755115848  
43.1847628331565 46.0043807840705 40.5281496800812 42.2577689927563  
46.5717043290731 45.4799270968969 41.4397539024976 41.1638563416981  
38.0452862258803

LOC651197 40.3478825593224 42.2577689927563 38.7745734037492  
38.5252456306656 42.4864576619427 37.1317006162938 39.0458123429605  
39.6474008369935 40.5912213523345 35.0668743708816 36.3390947880186  
39.5418280570561

LOC651202 176.520449609867 165.72797054597 153.237127853072  
170.560304063093 146.701131209299 194.189674572424 218.552143403657  
419.054753590648 217.263889616995 322.509777895373 263.53897660224  
308.025419469334

LOC651208 41.1523487516364 38.9338521051669 39.3709357615493  
39.6292788039793 40.7779767565889 39.8455060654531 47.1345949868029

40.2382908228517 43.1805016690297 39.9948390976317 41.0050831223107  
36.449101775775  
LOC651212 45.2875173643252 40.3384318592985 36.2683886571585  
31.4228928703009 43.3332476888305 42.6575535390785 41.9393838138203  
37.33030683349 35.4332080966594 42.2614524730856 37.2892641289258  
39.1553169409075  
LOC651213 41.3387790895716 42.7775752471711 38.9790184198145  
41.3027031037343 42.0709558258414 48.9826868640753 47.4439407315335  
37.86982638952 47.5564423692142 44.8997235283254 43.401782064778  
52.4992300612807  
LOC651219 36.1232327599945 45.4143854024453 38.5045333213784  
40.9607305725196 39.6535880152834 43.1826328292558 41.5817737564592  
37.6557714476853 42.8036731479932 40.8049408996274 43.3085358214154  
41.7575097298927  
LOC651231 40.6559419616644 45.4882438975269 37.3687900733549  
37.5382094267692 46.7508829977587 47.7556758818053 39.7576136507593  
43.3262148375525 41.3803269429468 43.4885245598939 43.7585538437696  
40.5703581862752  
LOC651249 38.7537364570873 34.6306468196142 37.2838080935695  
42.8235313007746 38.3561682218911 41.8613406887824 45.4799270968969  
37.4484310268909 37.4540772310118 38.528621456378 39.5399188536544  
38.0452862258803  
LOC651268 39.266565827316 40.7952353240579 38.9790184198145  
42.2496337895968 45.5809132232681 41.4508241771315 41.9393838138203  
37.4484310268909 40.8970401536578 43.2988017098387 42.2618615571566  
38.9496515344837  
LOC651272 53.8856501960117 42.3550738181144 38.9790184198145  
36.6501141438378 42.7107928951766 47.8636003588181 43.8206425661746  
38.8495095797881 42.2577689927563 35.4990901121893 46.0095710163378  
40.9683275553869  
LOC651280 41.5421429082231 43.0227387991135 41.437237454134  
42.357910063876 37.1565984182084 40.244271403831 42.2577689927563  
46.9986083378817 43.9450023643394 46.2286164776607 41.0050831223107  
43.2776458914333  
LOC651285 49.6241203903354 41.6466169548846 49.7350276169552  
43.6726153508978 45.9104478407175 39.7394181011603 56.2181240696479  
57.037639245179 49.8304479381623 47.2299678280724 41.6336636285875  
45.0985088502363  
LOC651286 42.5193208629123 40.4359177791566 50.0050760710506  
46.1673159982664 45.2556760873335 43.8582747295766 42.4939802311136  
37.33030683349 40.0403898620771 47.4767851750188 41.9083581529276  
45.0035308952466  
LOC651287 43.1805016690297 39.0894172982439 40.1985790927248  
35.7674462337723 45.5809132232681 42.5660695551615 50.3519150282938  
44.6107027295193 41.3803269429468 43.1839109702714 40.8225507267584  
48.5123041297835  
LOC651289 39.7576136507593 35.4484652445078 39.3709357615493  
37.8442841690502 38.2496050953547 41.8613406887824 40.3302268293707  
38.745552403895 35.5220586859301 42.6793753550854 41.5421429082231  
40.0557788909923  
LOC651291 40.5654775358427 39.6995529770239 40.301483914446  
45.0798408927912 42.269054475455 42.6575535390785 39.5496902678788  
43.9366081640576 44.7058233759912 46.2286164776607 43.4709415392696  
42.57175366709

LOC651293 35.5179217192467 41.159706131351 42.0621425894624  
42.9358255168086 38.4540849632254 42.357910063876 42.7431359850339  
42.7431359850339 40.3316153483289 36.8059561571675 39.0550139257658  
42.9887069977696

LOC651296 41.5421429082231 50.3586212130973 46.2625470410195  
42.1273928203021 42.4864576619427 44.2607789091176 38.941855825269  
37.1317006162938 39.7537274655115 49.3000844711116 39.7342718293432  
38.9496515344837

LOC651301 43.5710871617107 44.0409178714232 41.8751578329365  
41.5464765641928 42.1650127805175 41.9543948167375 41.9393838138203  
44.2159020605784 46.581796165231 44.8997235283254 41.8168470823451  
39.5418280570561

LOC651302 54.2648201582657 54.7855575216687 44.6032218589199  
43.1847628331565 87.0414124990547 54.7083331985678 71.3527183280827  
69.4677195088043 60.5608545741456 61.9882398986333 55.3147456054175  
56.361708620372

LOC651308 44.2350046179299 44.3529919625344 43.3085358214154  
36.5393857306744 45.2556760873335 39.132725377815 45.7452456977857  
43.7396619462033 39.7537274655115 38.957687788868 44.553780984244  
47.6938628797168

LOC651309 49.7827734675743 62.0908175930716 61.356483470053  
70.506090074243 40.6723334103791 43.5752393599169 46.4388841354122  
56.8094693588238 56.702421372165 106.049736669661 64.9959712888709  
77.707180044659

LOC651311 42.3433931248155 42.9358255168086 48.8100349749783  
43.9282059368202 47.6884372645373 47.8636003588181 51.1541843174981  
39.9576138799997 46.4164127487052 45.2556760873335 47.2134341420411  
43.6753843488695

LOC651314 39.8662795144616 43.0227387991135 42.8270038153139  
42.1273928203021 45.9104478407175 46.4648868771662 42.8684958525042  
44.293922970134 42.0621425894624 42.4594149893798 46.4205654140754  
42.1537476443423

LOC651315 45.3872406432794 42.6022652963326 44.3344900481112  
42.1273928203021 35.1411239266238 43.5752393599169 45.223075311113  
34.1806289878747 39.2809305246091 39.9948390976317 37.6484782516569  
41.2437378488025

LOC651316 52.7570461169969 82.3344892042646 65.1185966859561  
58.5406981871153 100.034549511526 107.440379066528 69.0037087543684  
50.857522488428 57.0301170427216 48.9826868640753 47.7535797917441  
62.9904770954043

LOC651319 36.7356360093603 40.8880530359822 36.178547300352  
39.6292788039793 37.0526522140242 43.2805590023412 32.7676164492555  
29.9617615620508 32.2545725371494 32.9981302187884 40.1742127891824  
35.7451401627836

LOC651324 42.8036731479932 34.2618170189676 38.3166554965434  
40.8681871019812 46.5557478175976 39.2248354955045 37.9430145836712  
40.3357777530419 43.5669306063196 41.7405682794166 47.0940613507321  
42.57175366709

LOC651326 32.4552405279874 35.6434124419782 37.3687900733549  
38.6414316877471 35.4484652445078 39.4953494583071 35.4623691645629  
39.5466975353131 39.853866204927 37.0320432433314 33.2774014136617  
37.5556299264699

LOC651333 36.6480005877129 47.1332119496722 36.4564050256915  
44.0451487108213 49.9493230064613 39.4953494583071 39.5496902678788



39.3709357615493 41.6616444147804 47.1001757441025 43.844855336215  
38.745552403895  
LOC651337 40.2543341073001 39.2907645923217 39.9101908547397  
44.7980740332174 41.9842695818285 40.4359177791566 41.706879587091  
36.5393857306744 45.6582729799009 43.401782064778 40.0766543123257  
40.2669497398702  
LOC651341 40.0557788909923 46.1569135229922 38.6727842796202  
37.1894304543751 40.7779767565889 42.750861693377 38.8417151851134  
37.9837233601316 41.6616444147804 43.7303813515864 43.6629145624937  
46.6397391251762  
LOC651344 46.0920218698606 47.8400694856726 40.7620472083159  
42.9358255168086 44.3557408297309 38.4330755397458 37.1643693306382  
44.0390019242862 47.9035532886869 41.1222709786153 37.3687900733549  
45.0035308952466  
LOC651345 37.8891397738265 41.0678614026819 39.9423951144754  
41.4606714407332 37.1869730989923 40.7616966228404 41.0829574574765  
39.5900693099685 38.5019918517688 41.9666541498638 40.0394833064005  
38.4330755397458  
LOC651353 43.5710871617107 41.0678614026819 43.5710871617107  
47.0874209746031 45.3675390992851 41.3553369544097 47.5963750520409  
42.357910063876 44.5303781239209 44.8997235283254 41.8168470823451  
43.1805016690297  
LOC651357 41.3387790895716 40.7952353240579 35.8265993915844  
39.3750969348308 38.0598374201407 37.4782441311626 32.9962272670005  
35.7973685350741 37.2810767789306 37.5343260962758 44.7114813656401  
38.2350720635382  
LOC651361 37.8386378737561 45.0115870036541 41.3366779545815  
40.4359177791566 40.7779767565889 42.157627240486 52.4111687156893  
46.2779564481158 43.5669306063196 47.1001757441025 41.6336636285875  
42.357910063876  
LOC651362 42.8036731479932 39.3999056968598 35.0970060242246  
36.5393857306744 38.9496515344837 39.2248354955045 38.2933870238743  
38.956280281655 41.6616444147804 32.7876527533679 33.4071187618571  
40.9683275553869  
LOC651371 44.0328992213727 40.3384318592985 43.401782064778  
41.0726336841311 34.806104801006 42.6575535390785 42.8684958525042  
31.8679959015659 39.2809305246091 43.1839109702714 45.390192977585  
39.9519547348106  
LOC651373 45.1912496459517 45.1694246393676 46.9040704638073  
41.7614975630362 38.3561682218911 43.1826328292558 44.8643898647322  
43.3262148375525 44.0519245668737 43.7303813515864 42.0750889188255  
42.357910063876  
LOC651380 64.3502363726659 49.83247261979 58.7382738968248  
59.987045425047 40.6723334103791 55.401776072578 58.5087296620514  
52.1788489555942 65.8622973953004 79.6133633483649 58.6464918752765  
49.7336769474446  
LOC651381 36.4564050256915 36.6968906669565 43.1931731665131  
36.890925044696 31.5599106749655 36.6996187567892 40.2154497375715  
37.4484310268909 38.0213051227859 42.9866214102525 38.2795150354677  
38.4330755397458  
LOC651386 38.957687788868 45.4882438975269 47.0940613507321  
39.5050383901884 46.7508829977587 43.7630587657205 44.2166118829877  
38.8495095797881 43.0930293831497 45.3530683538086 40.2649309204478  
44.0451487108213

LOC651390 35.7012997405508 43.5182502375207 43.6670755115848  
41.8778873678551 42.4864576619427 38.3418933808844 41.706879587091  
38.079222289614 38.7298222155532 42.9866214102525 38.3684202018524  
38.8495095797881

LOC651398 39.1590964332473 41.6466169548846 40.5734458834617  
42.2496337895968 41.8806343997257 44.3648993568405 46.1634822993009  
43.1567024035183 42.8036731479932 42.9866214102525 40.8225507267584  
34.2141875904985

LOC651400 44.7044140979108 35.3307157989724 38.5045333213784  
34.8137085420423 41.467005949568 41.554942319225 38.1793598983615  
37.5511560880902 37.10170285405 39.4710743516517 39.153226699662  
37.9607839934735

LOC651401 45.6517320730042 40.3384318592985 41.528370959196  
45.334106390212 42.9090346219023 39.9397419279057 39.3585350448719  
43.0390857698452 40.8970401536578 38.1042454705119 45.0589947942306  
41.3481355128089

LOC651403 38.2083710281545 31.6295801599123 41.6977706798234  
35.1451084093692 40.6723334103791 34.0045980663271 37.3799542961839  
37.4484310268909 36.5393857306744 34.6720534245631 39.8184668132023  
39.6352613956998

LOC651404 42.1537476443423 45.5842286511645 37.9482157381008  
43.5627649099623 38.9496515344837 47.0027453663546 41.4742337714895  
42.357910063876 49.5539622682049 46.2286164776607 45.5707650534259  
44.6484005362281

LOC651407 47.2862299990938 44.0409178714232 40.931294690669  
47.6687908290818 43.3332476888305 43.5752393599169 51.7714254834195  
43.844855336215 40.9901805728485 37.1275334308172 43.9450023643394  
40.6614700944853

LOC651410 41.6354649482853 40.148780650831 42.5406888281114  
38.4208429103799 41.9842695818285 38.2293008890613 41.3594868055879  
40.4359177791566 41.4636047919453 41.6373771565199 39.153226699662  
45.1735152121056

LOC651427 44.436995101921 39.6123051184545 39.3709357615493  
45.5869891570251 39.7568367479301 40.040778349137 44.8643898647322  
39.2672712041774 46.0106098064475 42.4594149893798 41.1638563416981  
42.2577689927563

LOC651429 45.6517320730042 39.2907645923217 45.5883690965192  
48.4916117779992 49.0828761839116 43.6670755115848 41.4742337714895  
49.8344973836834 46.581796165231 40.3235655331796 43.0016969050339  
43.3744503319109

LOC651430 46.8954576545929 41.554942319225 38.6005272730664  
34.8137085420423 38.5512429290626 41.2567470068038 40.6750540874299  
43.844855336215 42.0621425894624 37.4302011516587 38.3684202018524  
39.4490233720848

LOC651436 2009.75680599899 2071.90741263566 2640.06306087033  
2633.34100695103 6413.42384145372 4216.69417265779 1554.42895572029  
2300.20602168385 2448.64580552439 2697.96877833185 2689.80835574654  
4299.4451139256

LOC651441 44.0328992213727 45.0115870036541 42.157627240486  
48.1662933382789 45.9104478407175 44.1737502492846 43.0930293831497  
39.4710743516517 47.3791873993182 45.1569741609597 48.9754340235127  
43.3744503319109

LOC651450 44.0328992213727 37.7384958256497 41.8751578329365  
38.745552403895 35.2163900400329 37.7000400506818 36.08956004634

40.831207953647 38.9834959368496 40.2112371512838 39.3667161654772  
34.5633623842083  
LOC651453 56.0477607422828 67.0402749076279 73.2814174739782  
63.1604223919703 87.3957386451235 91.8295472317386 66.0350709576651  
74.6572522248684 71.9062462001972 88.4385631861141 77.4625808567081  
72.5346469941833  
LOC651454 43.844855336215 41.3610369241157 39.5450079747895  
43.9282059368202 37.6527901109005 38.4330755397458 42.629412460409  
36.7460922671619 37.4540772310118 35.195364621675 36.0481934423077  
36.9976231206067  
LOC651463 43.2724556187214 43.0971787292711 43.8495248991589  
38.2041059863839 46.4343327861696 44.1737502492846 40.4359177791566  
42.157627240486 37.10170285405 39.3698811593364 38.1835938174625  
42.8864415494484  
LOC651465 43.3638918705225 38.0226905622357 53.9612654850046  
40.9607305725196 45.3675390992851 39.4953494583071 41.1507980856436  
40.6171774724171 41.2870505273664 42.5664883002833 46.5650556481721  
40.5703581862752  
LOC651467 36.6480005877129 39.8695929627783 39.991353369336  
41.5464765641928 39.4693871570028 39.4953494583071 39.3585350448719  
38.3684202018524 36.7267557061938 40.2112371512838 39.9899430628542  
35.9604262434141  
LOC651468 38.385865183581 42.9358255168086 33.281531405287  
48.4916117779992 45.3675390992851 41.7627910693483 40.7910160811527  
43.5544347011646 44.3440839686558 43.6033221838149 42.4580504587581  
40.2669497398702  
LOC651476 34.1336988442837 32.2133093774284 46.0727230219512  
35.2143190355414 35.6434124419782 40.1428591998404 38.5066108855005  
36.9355798143571 36.5393857306744 36.6893251782922 38.2795150354677  
38.6454098044474  
LOC651481 36.9060997041453 36.89524015739 38.3166554965434  
38.745552403895 34.7018263647985 31.5556621809114 37.830876898596  
39.853866204927 32.2545725371494 33.8984830800739 40.0766543123257  
34.4570158133896  
LOC651483 34.5886782974123 36.0366673493555 37.5597671487621  
42.5664883002833 49.5666074434383 41.554942319225 41.3594868055879  
42.157627240486 46.0106098064475 46.441301934328 41.3553369544097  
37.6557714476853  
LOC651493 42.442231667357 47.8400694856726 37.2838080935695  
40.3180310664156 39.5595233162192 34.7983399096627 49.1067959632109  
42.6450179841129 39.9444191873552 44.3648993568405 35.1470994647364  
35.0222940937513  
LOC651495 43.0930293831497 41.7337506166619 43.401782064778  
45.0798408927912 43.5544347011646 41.4508241771315 41.9393838138203  
43.6434576713809 41.074824727477 46.6598879466655 42.6366765186182  
37.9607839934735  
LOC651503 44.2350046179299 39.8695929627783 46.4569566520107  
44.265834798964 46.0977687311222 45.7300501624017 41.706879587091  
52.8622615027833 44.3440839686558 45.3530683538086 44.7926323492519  
43.8575940017119  
LOC651506 38.7537364570873 39.0102066700839 43.401782064778  
39.1706564265495 38.4540849632254 41.2567470068038 33.4316681623175  
33.8558232866797 35.1155486926999 38.745552403895 37.7384958256497  
40.3691324547049

LOC651511 34.8099089553046 45.2556760873335 37.5597671487621  
43.6726153508978 37.8679241954337 42.2577689927563 42.357910063876  
39.3709357615493 34.0382693188794 43.6033221838149 40.723990462047  
37.6557714476853

LOC651513 42.3433931248155 43.1805016690297 45.4865173433646  
36.0481934423077 43.4544762830742 38.3418933808844 41.8315602975157  
37.9837233601316 41.074824727477 45.2556760873335 40.2649309204478  
43.5738557773903

LOC651515 38.385865183581 36.6968906669565 37.2838080935695  
35.6027791404152 44.5668141895992 39.9397419279057 35.6056062164318  
38.1835938174625 39.9444191873552 40.3235655331796 36.5359455830388  
35.9604262434141

LOC651520 45.2875173643252 46.4861258030402 49.5424425850549  
49.7350276169552 49.1928206164702 50.4022543872993 53.1884505015411  
50.1833483241864 47.7086093893038 46.2286164776607 47.4630625313159  
53.655233033193

LOC651524 51.7607563002005 37.6383530120621 34.1806289878747  
114.520410790135 43.004943518025 39.3841861812262 49.540449125788  
42.8482181313226 38.1169703906207 36.4651112441576 41.2598458726002  
35.7451401627836

LOC651530 42.5193208629123 41.2598458726002 49.3780606970538  
39.853175885492 46.0977687311222 44.8872784170036 44.7255207589606  
36.9355798143571 40.3316153483289 45.5776159432079 44.2142581488029  
42.57175366709

LOC651536 35.1307934330047 35.2143190355414 42.3536549114165  
47.8164193292842 50.6470461863549 39.7394181011603 41.253645578517  
45.1714698794331 43.8482802038826 44.6918600441328 38.6662194645633  
33.8196020406676

LOC651537 42.442231667357 42.7775752471711 43.6670755115848  
40.646702696033 38.1644569189523 44.8872784170036 38.2933870238743  
43.6434576713809 41.2870505273664 40.2112371512838 35.4386677371439  
43.4709415392696

LOC651546 37.7384958256497 38.4330755397458 43.6670755115848  
36.890925044696 42.269054475455 44.7804080899431 40.9157352260901  
36.2539950294089 38.3418933808844 37.5343260962758 41.1638563416981  
41.6550823405646

LOC651552 45.2875173643252 36.6002100641539 40.8420925848403  
41.8778873678551 35.9894133432376 47.0940613507321 41.0381860307445  
34.5886782974123 40.4220196471124 38.745552403895 42.911855821602  
39.8497227447888

LOC651553 46.9939712192224 41.4508241771315 43.1931731665131  
42.6913548400127 41.7929491793697 43.5752393599169 42.357910063876  
44.1311654985682 41.5635499110307 45.6868589181768 46.5650556481721  
46.917149434588

LOC651554 42.442231667357 39.1982470626863 38.6727842796202  
45.0798408927912 40.4639532172338 43.8582747295766 41.253645578517  
38.8495095797881 40.4220196471124 39.2623423164488 44.6286581923295  
41.1554481567603

LOC651556 38.7537364570873 42.3550738181144 44.696023817801  
38.2041059863839 40.5710637884029 35.8227939208521 42.357910063876  
42.4580504587581 41.3803269429468 42.6793753550854 39.153226699662  
41.1554481567603

LOC651558 41.1523487516364 47.6229101519945 51.3268475761593  
48.4916117779992 43.004943518025 43.0860383229288 48.3411413510851

51.1694248620208 51.3511088648386 51.2318935933116 47.1477056711335  
54.8630527326985  
LOC651561 35.1307934330047 39.6995529770239 36.5474283500601  
42.0102671859606 39.4693871570028 36.8059561571675 35.2163900400329  
31.0594903826598 35.5220586859301 38.745552403895 31.9682164860619  
34.1509644696334  
LOC651562 36.2496364442264 36.5219488315447 41.0356368374708  
44.550322123994 37.3508690072156 37.4782441311626 38.7337086062875  
37.7612949798895 38.2215591930186 34.8137085420423 37.2018803984555  
40.9683275553869  
LOC651565 40.2543341073001 34.7135536792489 32.7043743065388  
38.4208429103799 38.9496515344837 44.1737502492846 43.3262148375525  
41.7419877611072 40.4220196471124 38.2069499294002 36.7283081422707  
43.4709415392696  
LOC651568 42.1537476443423 45.4143854024453 39.5450079747895  
41.1886975241176 44.147557390293 42.8598805316863 42.357910063876  
39.3709357615493 40.3316153483289 39.8873706855774 42.357910063876  
38.3291713594599  
LOC651575 80.6434122355417 104.886608171525 155.287591646469  
80.7168944828052 125.052841200703 92.681224908389 96.4033477961156  
73.5950442915143 89.4747568145717 106.049736669661 99.6288131333575  
109.14984236229  
LOC651576 69.2322821603564 53.6057809398787 53.7792717770978  
39.5637454855233 65.2116399196759 41.1090481599939 66.2892779596928  
91.4581948567397 57.7865070833351 46.1390887492649 45.2265319826548  
42.57175366709  
LOC651577 42.8036731479932 42.2577689927563 46.0727230219512  
44.265834798964 48.3814421939888 43.8582747295766 39.5496902678788  
37.6557714476853 37.3600014814388 38.8507804383261 42.4580504587581  
42.8864415494484  
LOC651578 44.1294459089314 41.7337506166619 47.2962360458401  
44.7980740332174 44.0451487108213 43.5752393599169 39.3585350448719  
46.0633179231318 42.357910063876 44.571915452417 39.3667161654772  
42.357910063876  
LOC651580 39.5676051939342 43.3458769998118 36.5474283500601  
41.4273122914951 40.148780650831 42.6575535390785 43.3262148375525  
39.4710743516517 41.6616444147804 48.1392888470269 42.4580504587581  
48.27609330316  
LOC651581 44.0328992213727 43.683792219729 41.8751578329365  
47.2009420656854 48.5000946421718 41.159706131351 41.5817737564592  
36.9355798143571 47.27543600687 40.3235655331796 43.3085358214154  
44.3521099857368  
LOC651586 41.4508241771315 43.3458769998118 43.9450023643394  
40.8681871019812 41.8806343997257 44.0804700754786 44.4639405506967  
43.7396619462033 43.8482802038826 41.0057887014368 36.3390947880186  
40.3691324547049  
LOC651589 44.2350046179299 40.4359177791566 41.785676764591  
42.9358255168086 40.5710637884029 47.0940613507321 39.5496902678788  
42.157627240486 39.3750969348308 42.4594149893798 40.6373400186325  
42.9887069977696  
LOC651597 41.0608773166058 36.89524015739 39.991353369336  
39.5050383901884 36.5393857306744 43.1826328292558 40.0052661202207  
37.7612949798895 34.9428206949566 44.7958122466628 32.8881500803623  
37.7526485343328

LOC651603 35.5179217192467 41.159706131351 38.7745734037492  
33.8111782249716 36.5393857306744 37.7000400506818 35.2163900400329  
34.5886782974123 36.7267557061938 36.9102644736882 37.4642807402741  
38.9496515344837

LOC651609 45.1912496459517 40.716553247236 47.5673419710251  
43.1847628331565 43.4544762830742 42.8598805316863 38.4005795891396  
38.745552403895 38.3418933808844 41.5435611403119 43.844855336215  
38.4330755397458

LOC651610 40.8681871019812 38.8336427948187 39.5450079747895  
47.0874209746031 36.08956004634 44.0804700754786 43.4544762830742  
39.4710743516517 50.1603795873336 39.3698811593364 46.5650556481721  
44.9070250604284

LOC651612 38.957687788868 41.9894412416874 38.6005272730664  
38.6414316877471 37.2567512265363 42.357910063876 37.4772922422734  
43.844855336215 46.9739160257217 41.1222709786153 37.7384958256497  
43.7672102682067

LOC651614 43.1805016690297 37.4540772310118 46.4569566520107  
38.6414316877471 43.5544347011646 44.7804080899431 35.6056062164318  
41.0381860307445 42.7150227340364 37.920964499903 42.4580504587581  
40.6614700944853

LOC651617 39.266565827316 40.2493681589104 43.7630587657205  
37.4223289687135 41.1868052124344 32.5219627196161 39.3585350448719  
36.1375121409002 43.2761454096265 36.9102644736882 41.1638563416981  
34.1509644696334

LOC651619 42.2455707947223 37.1685072112618 36.6522278218553  
38.9534635879195 42.9090346219023 41.4508241771315 36.9355798143571  
40.2382908228517 39.9444191873552 41.9666541498638 43.0971787292711  
42.1537476443423

LOC651621 52.7570461169969 56.2305155589239 77.0301627655229  
57.2856683017619 56.6951078698291 54.1440452292081 51.4349390827895  
47.5950227477807 62.9922928277769 51.7594352155304 50.9815930710768  
59.5875857071693

LOC651624 37.4554876386402 45.0115870036541 41.528370959196  
41.4273122914951 37.7576900881741 39.132725377815 43.0930293831497  
44.4031868028216 40.9901805728485 39.5637454855233 46.824299585607  
40.9683275553869

LOC651630 35.7012997405508 43.5873188565519 48.4890615340603  
46.4555908533915 44.2607789091176 46.0364000143537 42.7431359850339  
41.3506832276112 49.8304479381623 46.1390887492649 40.723990462047  
44.7401523707775

LOC651635 42.6036491382658 43.683792219729 45.6989664108554  
41.0726336841311 42.0709558258414 51.6053353177789 46.1634822993009  
40.4359177791566 47.27543600687 45.6868589181768 45.9104478407175  
44.2527566343661

LOC651638 42.442231667357 41.9894412416874 42.9104454767916  
42.8235313007746 39.3667161654772 39.6251842352088 38.941855825269  
36.2539950294089 38.7298222155532 41.1222709786153 44.8872784170036  
40.9683275553869

LOC651643 41.5421429082231 44.6918600441328 45.7968648044613  
45.8844325913247 47.3172462673426 44.3648993568405 48.1747307200218  
46.2779564481158 48.0163377492228 43.0919221375514 45.310660704531  
46.7182294568603

LOC651647 38.957687788868 41.6466169548846 51.9885249508283  
50.0526763693329 43.3332476888305 42.4580504587581 45.4799270968969

44.797320243931 47.6195009345747 44.2580151149956 46.0905079010237  
43.4709415392696  
LOC651648 44.6231541342 44.1239711172417 43.3085358214154  
50.378948785456 43.6587492470348 51.4931742685391 52.0942589368478  
45.3872406432794 43.5669306063196 48.1392888470269 47.2134341420411  
43.5738557773903  
LOC651655 37.7384958256497 33.1817617228171 33.8558232866797  
36.6501141438378 37.1565984182084 33.5578650644246 39.3585350448719  
30.9078709537098 31.372171135652 37.0320432433314 34.6366195121669  
36.9976231206067  
LOC651659 38.385865183581 45.5842286511645 43.9450023643394  
40.9607305725196 40.8873907150245 44.1737502492846 46.1634822993009  
48.0582855095143 45.3756389170606 47.2299678280724 37.6484782516569  
44.3521099857368  
LOC651668 39.266565827316 39.8695929627783 43.1931731665131  
42.5664883002833 39.4693871570028 47.0027453663546 44.2166118829877  
40.2382908228517 45.4799270968969 44.0409178714232 42.8263096141654  
42.9887069977696  
LOC651675 46.8141313516997 42.6022652963326 36.8730514568925  
38.5252456306656 39.5595233162192 44.8872784170036 43.0930293831497  
37.7612949798895 39.1790517315259 39.3698811593364 42.7275315121163  
41.3481355128089  
LOC651680 46.0023068797812 44.0409178714232 44.7829632472754  
42.8235313007746 41.467005949568 44.9896851005259 42.8684958525042  
43.1567024035183 45.2897806651929 44.6918600441328 50.4740079109854  
41.5536168238478  
LOC651686 41.9407041937973 41.159706131351 42.9104454767916  
51.223859150798 43.4544762830742 40.5281496800812 52.0942589368478  
43.9366081640576 43.2761454096265 45.3530683538086 43.6629145624937  
42.57175366709  
LOC651694 39.8662795144616 45.4143854024453 42.9104454767916  
62.8201270538435 39.0564222526273 41.8613406887824 42.7431359850339  
37.2237132058632 38.7298222155532 40.8049408996274 46.4753015651202  
38.3291713594599  
LOC651695 36.2496364442264 36.0366673493555 39.1799070031819  
42.357910063876 36.3390947880186 39.9397419279057 38.2933870238743  
43.1567024035183 36.0741672064298 38.1042454705119 48.6184776976167  
41.7575097298927  
LOC651701 39.7576136507593 41.3610369241157 41.2365089689635  
42.9358255168086 41.8806343997257 45.3882138838137 40.0052661202207  
42.157627240486 38.2215591930186 46.325232414659 39.4410515050885  
40.4639532172338  
LOC651704 41.2424637338424 44.4411734611229 41.6079958749402  
42.5664883002833 46.0977687311222 40.3357777530419 41.9393838138203  
43.844855336215 40.0403898620771 42.0621425894624 45.390192977585  
34.806104801006  
LOC651711 37.0320432433314 34.0382693188794 37.8386378737561  
36.264823544143 38.1644569189523 43.2805590023412 33.5578650644246  
36.1375121409002 37.0126425326534 34.1648535095605 44.8872784170036  
37.6557714476853  
LOC651713 40.8681871019812 43.2649781354792 46.4569566520107  
39.853175885492 40.3452320167286 42.4580504587581 51.3064929551674  
43.0390857698452 43.2761454096265 41.9666541498638 42.357910063876  
41.9430737035925

LOC651714 44.9896851005259 41.0678614026819 48.1997158668729  
50.8567345921473 45.9104478407175 47.9503724044453 40.9157352260901  
51.2623287419357 43.2761454096265 49.9493230064613 38.6662194645633  
43.8575940017119  
LOC651721 36.5393857306744 37.10170285405 37.5597671487621  
38.4208429103799 39.9697332660833 32.2133093774284 37.6036146841933  
38.5457716679071 37.6383530120621 37.920964499903 41.0808257270221  
35.5523662009011  
LOC651723 43.9309845324767 41.4508241771315 45.5883690965192  
48.856176220627 37.5556299264699 42.357910063876 40.7910160811527  
43.1567024035183 37.1820543575123 43.6033221838149 41.9908237694988  
42.9887069977696  
LOC651728 42.442231667357 41.2598458726002 38.2280071951674  
36.0481934423077 39.6535880152834 38.3418933808844 38.0598374201407  
36.8400213077707 41.1742244762318 37.1275334308172 33.7948557837079  
39.4490233720848  
LOC651729 36.2496364442264 47.4740726032707 45.3974838013476  
35.8472302065546 40.2449343247539 45.1873487463472 46.5650556481721  
35.9023742468744 41.863927676552 40.1179210534118 41.9908237694988  
38.6454098044474  
LOC651730 39.0620487644635 41.9894412416874 40.931294690669  
40.8681871019812 41.1868052124344 43.1826328292558 53.0277416531043  
41.3506832276112 38.9834959368496 45.3530683538086 40.4504608195666  
46.1592873342534  
LOC651731 40.148780650831 45.4143854024453 45.1569741609597  
41.0726336841311 36.3390947880186 40.244271403831 38.941855825269  
47.0940613507321 39.3750969348308 40.5090849993014 39.6403089864678  
36.9976231206067  
LOC651732 39.9697332660833 41.6466169548846 38.2280071951674  
43.5627649099623 42.3685136297603 39.2985791324641 38.6243997507646  
41.2551966132486 45.6582729799009 40.2112371512838 42.2618615571566  
39.5418280570561  
LOC651738 46.1673159982664 51.524711857679 37.1643693306382  
108.246687420741 38.8456942580061 49.3172204533818 57.1070449050465  
47.4740726032707 42.1594905198929 43.844855336215 41.1638563416981  
40.6614700944853  
LOC651741 47.1962846565261 40.5400384479766 41.0356368374708  
35.3829784221072 41.8806343997257 42.4580504587581 44.8643898647322  
40.1474543172332 40.2274522635576 45.2556760873335 43.6629145624937  
43.3744503319109  
LOC651745 43.7585538437696 42.2577689927563 38.6005272730664  
37.1894304543751 39.4693871570028 40.1428591998404 40.6750540874299  
39.1652965788406 38.4344387289956 43.401782064778 38.079222289614  
46.3411353377615  
LOC651746 38.385865183581 36.9994058279362 35.2101597814352  
41.4273122914951 34.3633615460307 38.7340969861754 35.9894133432376  
41.8417024632349 37.8319142847141 45.0155543555707 40.1742127891824  
39.0536056496869  
LOC651747 38.0089018744739 39.6995529770239 40.301483914446  
41.0726336841311 41.3755760434934 42.357910063876 43.4544762830742  
37.0390589468421 42.6366765186182 38.745552403895 40.4504608195666  
44.7401523707775  
LOC651751 65.0721641331632 271.070078611015 524.451156145427  
351.700618429121 40.9950639693255 41.8613406887824 52.4111687156893



83.7829283976292 37.9273653326866 37.3179578037963 42.8263096141654  
38.0452862258803  
LOC651752 42.2455707947223 41.0678614026819 42.8270038153139  
43.3078542962968 41.0885562160946 46.0364000143537 45.3597029614942  
43.844855336215 39.2809305246091 47.2299678280724 42.8263096141654  
48.0350549043063  
LOC651754 41.4508241771315 46.4861258030402 43.5710871617107  
40.8681871019812 34.3633615460307 40.8634043028528 40.3302268293707  
46.7980335276155 40.7847110517594 36.8059561571675 44.1148826235374  
42.2577689927563  
LOC651758 43.0001432913058 42.6939394537076 40.4882741869718  
37.651298468202 39.1650142708257 43.3785777889265 47.1345949868029  
39.7509165247419 45.5779686360641 41.4397539024976 39.7342718293432  
47.1060577218993  
LOC651760 43.4626049853157 38.5252456306656 37.4642807402741  
42.5664883002833 36.5393857306744 35.4142595025086 33.4316681623175  
42.6450179841129 39.0775870687758 43.4885245598939 40.3452320167286  
37.7526485343328  
LOC651763 37.6397652536077 43.8495248991589 45.3974838013476  
46.1673159982664 44.3557408297309 44.5544727111028 47.1345949868029  
37.7612949798895 48.9931786790166 38.2069499294002 39.6403089864678  
42.6758568421347  
LOC651769 44.0328992213727 36.7976562409506 45.2313723727673  
48.856176220627 42.4864576619427 39.7394181011603 43.8206425661746  
40.5158867964016 39.9444191873552 34.3674468322242 42.2618615571566  
37.2810767789306  
LOC651772 41.2424637338424 39.0102066700839 45.310660704531  
43.074472921841 34.1686574241133 42.750861693377 39.4600924554505  
39.6474008369935 40.8970401536578 36.4651112441576 43.9450023643394  
38.1421709520616  
LOC651774 37.7384958256497 37.920964499903 38.6727842796202  
45.0798408927912 39.2608760193011 38.7340969861754 41.4742337714895  
41.0381860307445 39.0775870687758 39.9948390976317 39.153226699662  
45.0985088502363  
LOC651777 42.3433931248155 39.6995529770239 40.1985790927248  
46.8954576545929 36.9702228618069 40.1428591998404 40.2154497375715  
38.5457716679071 42.8036731479932 44.1379638573455 35.046946054314  
40.2669497398702  
LOC651787 46.263826584899 41.9894412416874 43.3085358214154  
44.6905691366696 53.8260140375214 42.4580504587581 45.3597029614942  
43.844855336215 46.1101825640108 48.0211752672327 43.844855336215  
43.7672102682067  
LOC651789 37.3463875295726 42.6022652963326 38.6005272730664  
37.29566077996 42.7982502551634 42.9695585740813 43.4544762830742  
43.4544762830742 35.6139301508335 41.6373771565199 38.3684202018524  
37.6557714476853  
LOC651790 45.3872406432794 40.5400384479766 44.1452943804044  
41.5464765641928 40.2449343247539 45.0882356578404 43.4544762830742  
43.9366081640576 38.1169703906207 40.7063426028871 45.310660704531  
42.0424641526302  
LOC651794 41.7397731376692 44.8529259387308 42.640829914102  
42.2496337895968 36.6354013629791 36.1190722948669 40.1235656101329  
42.7431359850339 44.4395580493118 43.2988017098387 43.3085358214154  
39.2469742642337

LOC651807 37.6397652536077 39.6123051184545 39.991353369336  
39.066284740632 43.9450023643394 45.6129956328415 42.0605906240248  
44.0390019242862 44.1519466943185 44.571915452417 43.3085358214154  
41.2437378488025

LOC651808 43.2724556187214 34.7135536792489 39.4710743516517  
37.4223289687135 37.6527901109005 34.6977013306396 37.830876898596  
39.4710743516517 40.5912213523345 38.957687788868 39.153226699662  
37.1747156131306

LOC651809 43.5710871617107 45.6533175604486 41.3366779545815  
45.7397504535169 38.5512429290626 44.1737502492846 48.8319884367456  
42.0494116081998 44.2607789091176 41.5435611403119 47.2134341420411  
41.4508241771315

LOC651816 303.189681281366 673.002926695262 311.585488207444  
234.727123301682 1900.96666834569 336.490083577377 1123.99110499679  
567.978225839768 733.358170858378 116.891649452816 140.698550434486  
162.721587349434

LOC651820 38.1169703906207 39.5050383901884 46.0727230219512  
42.0102671859606 41.467005949568 46.1513019317765 44.4639405506967  
42.0494116081998 43.4656637536244 46.7646877499666 40.9157352260901  
37.7526485343328

LOC651821 43.4626049853157 43.7644428186265 43.0016969050339  
43.3078542962968 43.3332476888305 40.650742261428 45.1017494688414  
40.6171774724171 42.2577689927563 42.6793753550854 41.2598458726002  
46.1592873342534

LOC651825 41.2424637338424 40.3384318592985 36.4564050256915  
41.3027031037343 40.5710637884029 43.8582747295766 47.7390230243778  
40.4359177791566 39.6609238036815 40.6022003765153 43.9450023643394  
43.9541718254769

LOC651829 40.7609952437622 43.5873188565519 42.157627240486  
36.5393857306744 44.3557408297309 39.132725377815 41.8315602975157  
44.5029690493211 41.5635499110307 41.5435611403119 37.7384958256497  
41.6550823405646

LOC651830 37.4554876386402 36.0366673493555 41.0356368374708  
53.2046867327331 35.4484652445078 37.9003288112261 42.1607322031054  
41.0381860307445 40.4997186069494 39.2623423164488 42.2618615571566  
36.449101775775

LOC651834 37.3463875295726 41.3610369241157 45.063792968927  
44.550322123994 40.7779767565889 36.8059561571675 39.8695929627783  
35.6825474397235 37.0126425326534 36.0481934423077 42.0750889188255  
35.6427313468066

LOC651842 45.3872406432794 46.0023068797812 48.6037684272115  
49.9014504704021 52.5645416722441 47.4699236780425 40.9157352260901  
47.2864663693787 48.8842909466002 47.1001757441025 45.2265319826548  
42.4607795638552

LOC651845 45.0985088502363 45.2556760873335 38.6005272730664  
71.7167037224069 37.4470183315826 43.2805590023412 49.540449125788  
44.8997235283254 46.4861258030402 42.9866214102525 46.972521499515  
47.1060577218993

LOC651848 46.1673159982664 38.7344853699576 41.1367478979484  
45.334106390212 40.9950639693255 43.8582747295766 41.1507980856436  
41.0381860307445 40.2274522635576 47.611018474151 42.6366765186182  
35.7451401627836

LOC651849 41.8409927585705 39.5050383901884 36.8730514568925  
44.265834798964 42.7107928951766 40.9506062495231 45.7452456977857

39.9576138799997 36.3649677956953 41.7405682794166 41.3553369544097  
44.5432192783161  
LOC651850 44.8914371498528 44.8529259387308 40.7620472083159  
46.8954576545929 42.3685136297603 46.4648868771662 36.4098694708483  
41.8417024632349 38.9006788676407 41.5435611403119 44.3763859390287  
41.3481355128089  
LOC651859 37.55264801907 33.6902293666089 42.640829914102  
35.3829784221072 42.7982502551634 39.9397419279057 39.7576136507593  
35.9023742468744 39.3750969348308 38.0078357808393 38.5668610487033  
38.3291713594599  
LOC651860 42.2455707947223 42.4493032770053 39.8299340037009  
45.0798408927912 36.5393857306744 48.8744644207821 42.9803717121865  
44.6107027295193 37.1820543575123 43.2988017098387 41.9083581529276  
40.4639532172338  
LOC651864 44.0328992213727 46.0713306971594 39.3709357615493  
35.6027791404152 39.9697332660833 44.9896851005259 41.706879587091  
43.2551508830106 43.4656637536244 35.6208308220005 42.2618615571566  
39.0536056496869  
LOC651868 39.5676051939342 42.0709558258414 39.8299340037009  
48.9944486068347 43.004943518025 43.8582747295766 41.253645578517  
38.956280281655 42.9020321355927 41.1222709786153 43.5710871617107  
36.9976231206067  
LOC651872 43.1805016690297 49.2050538150106 53.4743535852344  
48.4916117779992 37.6527901109005 54.2503023961401 43.3262148375525  
45.1714698794331 56.5094373275922 49.7259371799014 48.6767028205398  
69.7644070698124  
LOC651876 50.379587451669 49.6203214143464 50.9933795450314  
45.334106390212 50.5110359971301 45.3882138838137 54.1707158323527  
49.7309743973184 51.4413099192899 60.1466326805616 57.2008272301399  
59.5875857071693  
LOC651881 50.6473771879221 51.3084273211359 58.637422084759  
49.3654837541353 57.1935729219207 43.7630587657205 50.3519150282938  
47.4740726032707 44.3440839686558 54.3554233228353 58.133863696399  
56.2804354745795  
LOC651886 37.3463875295726 41.6466169548846 35.8265993915844  
39.7411455670172 44.7829632472754 41.7627910693483 38.0598374201407  
42.2577689927563 39.1790517315259 42.1622837416589 40.3452320167286  
36.6603338274678  
LOC651892 42.6036491382658 41.159706131351 45.2313723727673  
42.1273928203021 42.6022652963326 41.9543948167375 39.3585350448719  
44.5029690493211 49.0986627051784 45.2556760873335 43.401782064778  
46.7182294568603  
LOC651894 1864.63057767867 2054.64068255575 2440.77408185413  
1842.15643221012 2178.59848996529 2337.7738990994 1468.75291542154  
1453.77801653969 1595.69503047506 2266.34088015654 2417.02418518222  
2816.7754199004  
LOC651896 39.8662795144616 43.9421822132391 39.5450079747895  
46.4555908533915 35.5220586859301 37.9951997351435 42.629412460409  
40.2382908228517 38.5252456306656 40.8970401536578 41.1638563416981  
45.5800840647989  
LOC651898 48.2910530887214 49.6841415268611 43.3085358214154  
83.2925226467532 38.4540849632254 42.4580504587581 51.5967098638347  
40.4359177791566 45.7452456977857 46.1390887492649 45.1432412071268  
43.2776458914333

LOC651900 43.3638918705225 38.7344853699576 44.0451487108213  
42.5664883002833 40.9950639693255 51.9421032049606 42.357910063876  
40.5158867964016 43.8482802038826 42.5664883002833 44.3763859390287  
44.1452943804044

LOC651905 43.7585538437696 31.8637059340657 35.9305494063137  
38.745552403895 44.6834648302383 37.9951997351435 30.7315474127249  
37.9837233601316 37.8319142847141 43.4885245598939 37.5583886316038  
39.0536056496869

LOC651907 44.3355304829989 36.5219488315447 41.0356368374708  
49.3654837541353 41.9842695818285 38.6414316877471 41.1507980856436  
40.4359177791566 40.4220196471124 43.2988017098387 44.7114813656401  
41.3481355128089

LOC651914 40.0557788909923 45.4143854024453 43.8495248991589  
34.5425384901279 40.9950639693255 39.2985791324641 38.941855825269  
42.7431359850339 38.6322728994674 40.6022003765153 38.8507804383261  
44.0451487108213

LOC651916 35.2267149016596 47.087835967892 44.2405728317107  
41.0726336841311 45.5809132232681 44.6524308640784 40.7910160811527  
44.7044140979108 44.8997235283254 43.9450023643394 39.6403089864678  
39.5418280570561

LOC651919 45.2875173643252 45.8669209716694 44.7829632472754  
36.7892997857376 42.6022652963326 45.0882356578404 49.3854238365325  
38.079222289614 44.8003345643334 38.1042454705119 40.723990462047  
47.0130468198828

LOC651921 40.0557788909923 45.0115870036541 38.4043916290561  
47.481302504066 45.5809132232681 40.3357777530419 41.5817737564592  
38.8495095797881 42.1594905198929 39.9948390976317 45.2265319826548  
41.7575097298927

LOC651923 38.6454098044474 41.3610369241157 36.8730514568925  
42.0102671859606 40.9950639693255 37.2686490268265 38.7337086062875  
36.9355798143571 38.5252456306656 39.6719190054379 39.2542963855807  
41.3481355128089

LOC651933 42.7150227340364 41.554942319225 36.4564050256915  
34.1051821768421 39.3667161654772 41.7627910693483 41.0381860307445  
35.6825474397235 39.0775870687758 40.6022003765153 35.3362091871364  
41.6550823405646

LOC651936 49.3463416794995 46.0713306971594 50.3950981988762  
42.5664883002833 43.1252272136667 45.9266745571724 46.8613212048981  
46.695848687694 43.3744503319109 44.6918600441328 43.1931731665131  
47.5025821041537

LOC651951 39.7576136507593 37.10170285405 38.6005272730664  
41.0726336841311 37.956732373465 36.6271061451613 34.5633623842083  
32.7676164492555 35.1155486926999 36.8059561571675 40.2649309204478  
35.0222940937513

LOC651952 40.7609952437622 46.29198852834 44.4311655729487  
43.6726153508978 44.5668141895992 42.2577689927563 50.5252048155459  
41.8417024632349 44.2607789091176 50.6486940895674 41.0050831223107  
40.2669497398702

LOC651957 43.0001432913058 97.7965639721152 189.650905999631  
47.6687908290818 92.0958762013613 44.1737502492846 249.704644191338  
48.272324215504 53.3932110698117 54.3554233228353 84.607833108004  
49.8253396161069

LOC651959 41.9407041937973 44.1239711172417 46.4569566520107  
46.7577982595088 54.1225249245036 52.5330333302271 40.0052661202207

44.9977782988116 48.3119523820103 48.0211752672327 45.9104478407175  
46.4499258373233  
LOC651961 30.1388203764747 40.716553247236 38.2280071951674  
47.481302504066 40.3452320167286 39.4953494583071 42.7431359850339  
35.4526946152955 36.6312676076142 38.2069499294002 41.0808257270221  
36.449101775775  
LOC651963 42.8036731479932 41.9894412416874 47.2055133646385  
37.1894304543751 43.2484996523549 41.6590564937735 46.7100796279384  
44.8997235283254 43.4656637536244 55.3153799233744 42.2618615571566  
40.5703581862752  
LOC651965 38.8561375693335 41.6466169548846 39.9101908547397  
45.8844325913247 40.3452320167286 42.9695585740813 37.6036146841933  
40.931294690669 44.7058233759912 40.8970401536578 38.3684202018524  
40.2669497398702  
LOC651966 42.1537476443423 36.6968906669565 47.3861758958576  
43.074472921841 45.9104478407175 45.4882438975269 46.5650556481721  
42.157627240486 43.6670755115848 43.7303813515864 40.4504608195666  
44.8372404608604  
LOC651974 44.8914371498528 47.4076235350059 38.9790184198145  
46.614092935749 38.1644569189523 44.9896851005259 41.0381860307445  
39.9576138799997 32.4931776430014 43.0919221375514 47.6125796208753  
38.9496515344837  
LOC651979 45.7356815244513 45.0905928998779 42.8270038153139  
50.0526763693329 46.7508829977587 40.4359177791566 51.0013344286851  
50.3972033014227 49.5539622682049 41.1222709786153 45.2265319826548  
41.3481355128089  
LOC651986 38.1169703906207 38.0226905622357 39.8299340037009  
37.5382094267692 39.7568367479301 40.7616966228404 44.0687697278114  
35.9023742468744 35.9645119596869 35.8304004211528 38.745552403895  
38.745552403895  
LOC651987 44.9896851005259 41.2598458726002 43.4709415392696  
42.5664883002833 47.2074332636566 45.8325181856483 52.0942589368478  
42.2577689927563 49.2879849674517 42.9866214102525 42.170702295259  
42.2577689927563  
LOC651991 37.1485601150873 36.4002279956519 36.8730514568925  
38.6414316877471 43.4544762830742 40.040778349137 38.2933870238743  
38.079222289614 39.9444191873552 40.8970401536578 38.1835938174625  
39.7411455670172  
LOC651997 42.7150227340364 31.8637059340657 35.7105247506212  
39.853175885492 33.6330903323612 31.3901365951213 37.0564573649223  
42.0494116081998 38.9834959368496 36.2435874904689 39.0550139257658  
33.2382077236252  
LOC652000 39.266565827316 36.5219488315447 38.4043916290561  
36.7892997857376 41.467005949568 36.3845892764084 38.2933870238743  
38.1835938174625 32.9756367838345 39.5637454855233 38.079222289614  
43.7672102682067  
LOC652002 57.8765910878975 47.9665737016961 48.4890615340603  
59.4674205670657 52.4370718282084 62.7515429046888 46.1634822993009  
46.5717043290731 42.8036731479932 42.5664883002833 45.7328341667151  
44.4475838947656  
LOC652003 41.5421429082231 38.1312950900467 36.4564050256915  
46.8954576545929 42.9090346219023 40.650742261428 34.5633623842083  
35.4526946152955 41.5635499110307 36.1550293353654 42.4580504587581  
37.6557714476853

LOC652009 37.2474303302343 38.0226905622357 39.2707964550441  
38.2041059863839 45.1137938810047 41.159706131351 37.4772922422734  
37.0390589468421 39.9444191873552 36.3612409063792 30.9159908723475  
41.6550823405646

LOC652011 35.8208542506595 38.3322849790657 34.0382693188794  
41.1886975241176 37.4470183315826 37.2686490268265 33.3231576795423  
33.3307770183871 34.226171989766 37.920964499903 33.4071187618571  
36.7762265039864

LOC652015 42.2455707947223 40.4359177791566 39.3709357615493  
50.2163892855092 46.8674366115656 44.1737502492846 46.1634822993009  
43.1567024035183 43.7630587657205 41.7405682794166 44.7926323492519  
44.7401523707775

LOC652022 39.6609238036815 40.5400384479766 40.4070046183108  
41.3027031037343 42.1650127805175 41.4508241771315 44.9863726205428  
39.3709357615493 42.357910063876 44.571915452417 37.7384958256497  
39.2469742642337

LOC652034 35.5179217192467 33.939263369489 37.4642807402741  
33.6816578730693 48.6224651100733 36.9060997041453 35.9894133432376  
35.3608605269276 33.6902293666089 39.4710743516517 36.9060997041453  
40.6614700944853

LOC652038 46.6348258763289 42.2577689927563 49.4573631027613  
34.3595588146954 39.5595233162192 42.0574848021044 40.0052661202207  
42.5435283762933 41.2870505273664 39.0648733099061 41.6336636285875  
41.1554481567603

LOC652043 38.5648843914189 39.1982470626863 38.6005272730664  
42.9358255168086 40.6723334103791 41.0582900711341 42.629412460409  
44.4031868028216 38.6322728994674 45.3530683538086 39.9070785037411  
39.7411455670172

LOC652044 41.9407041937973 38.8336427948187 40.4882741869718  
41.1886975241176 38.1644569189523 42.5660695551615 33.3231576795423  
43.9366081640576 35.5220586859301 39.8873706855774 43.9450023643394  
35.8429598823818

LOC652045 45.8108990837624 37.6383530120621 41.1367478979484  
43.8002456102021 42.269054475455 44.0804700754786 44.2166118829877  
37.5511560880902 40.6957787921451 41.8613406887824 39.8184668132023  
40.4639532172338

LOC652046 45.6517320730042 42.7775752471711 47.4740726032707  
44.6905691366696 49.5666074434383 44.9896851005259 36.3194282084339  
41.0381860307445 42.0621425894624 41.6373771565199 41.6336636285875  
41.6550823405646

LOC652048 37.55264801907 40.9731067463382 44.7829632472754  
48.665578118898 48.5000946421718 43.3785777889265 41.9393838138203  
44.0390019242862 48.2123120250343 42.6793753550854 48.8088340735921  
39.5418280570561

LOC652049 44.1294459089314 42.6022652963326 45.063792968927  
44.1483976313959 41.5668884168669 41.9543948167375 40.6750540874299  
48.5681478665796 40.6957787921451 44.4652605017595 40.0766543123257  
43.1805016690297

LOC652051 42.0532901689036 37.920964499903 42.7303139017786  
45.4634652319753 36.9060997041453 39.9397419279057 42.0605906240248  
41.0381860307445 34.0382693188794 38.0078357808393 36.43924066428  
39.8497227447888

LOC652054 41.6354649482853 39.8695929627783 41.2365089689635  
40.7481155008596 44.5668141895992 37.9003288112261 41.253645578517

37.5511560880902 45.8325181856483 41.7405682794166 43.0016969050339  
35.6427313468066  
LOC652062 46.6348258763289 40.8880530359822 46.2625470410195  
48.9944486068347 41.1868052124344 39.132725377815 43.9450023643394  
44.293922970134 37.4540772310118 41.7405682794166 39.8184668132023  
47.9566297250148  
LOC652065 38.304249186058 34.3715326040967 38.9790184198145  
40.1804147506786 32.4181238410234 34.9849896310235 42.8684958525042  
40.831207953647 38.0213051227859 36.6893251782922 37.6484782516569  
32.7800533388945  
LOC652067 42.3433931248155 43.9421822132391 44.7829632472754  
46.3203995372658 48.0234896130991 47.8636003588181 46.9929836306816  
44.0390019242862 49.641159251878 47.7180816682562 43.844855336215  
45.5800840647989  
LOC652068 42.3433931248155 37.10170285405 40.8420925848403  
56.2508140932179 43.004943518025 47.5733603903505 41.3594868055879  
40.047314525032 40.5912213523345 39.2623423164488 38.956280281655  
38.8495095797881  
LOC652070 46.0023068797812 39.3999056968598 42.9104454767916  
37.29566077996 39.2608760193011 45.2852528185486 38.4005795891396  
41.7419877611072 41.5635499110307 40.5090849993014 40.8225507267584  
40.4639532172338  
LOC652071 5354.58328030315 7476.94487791412 6555.04068292972  
5479.94045861143 5776.17749026501 8545.48005557056 7476.94487791412  
7075.82842238887 8441.71894028273 5811.22276358172 7168.83136860899  
8349.59691588869  
LOC652076 47.9175508887533 44.2630383225933 44.7829632472754  
60.4646208319121 49.5666074434383 44.9896851005259 51.9421032049606  
46.8954576545929 49.2879849674517 43.844855336215 47.7535797917441  
53.3059058105836  
LOC652077 30.3383368296776 30.1388203764747 41.437237454134  
37.29566077996 42.0709558258414 37.4782441311626 41.3594868055879  
40.3357777530419 37.10170285405 37.1275334308172 34.5633623842083  
38.6454098044474  
LOC652078 40.3478825593224 39.6995529770239 38.0452862258803  
36.9912468186322 36.2048942610546 39.7394181011603 38.6243997507646  
34.3865306339645 32.2133093774284 35.195364621675 32.5482839399637  
29.7878371181841  
LOC652080 38.8561375693335 38.0226905622357 38.1421709520616  
37.0732977341185 31.4686555405126 36.9060997041453 40.5585676679482  
33.0038344711883 34.7722083264266 35.6208308220005 31.3983249770297  
36.3454320848591  
LOC652082 44.3355304829989 36.4002279956519 41.3366779545815  
42.4580504587581 42.7982502551634 43.5752393599169 37.830876898596  
46.2779564481158 45.7452456977857 43.6033221838149 45.8180710486329  
37.3600014814388  
LOC652086 42.3433931248155 42.7775752471711 34.9849896310235  
44.6905691366696 43.7517118200398 39.132725377815 48.9826868640753  
40.6171774724171 39.5806465938526 41.3321861371202 41.1638563416981  
33.6902293666089  
LOC652094 35.7012997405508 31.6295801599123 35.6139301508335  
38.4208429103799 35.1411239266238 32.2133093774284 37.7136011474903  
36.8400213077707 35.4332080966594 30.7315474127249 36.6298807161755  
33.5578650644246

LOC652097 43.0930293831497 41.8073910693411 45.7968648044613  
40.9607305725196 37.3508690072156 40.9506062495231 38.941855825269  
41.6466169548846 39.6609238036815 42.4594149893798 41.2598458726002  
44.3521099857368

LOC652100 39.6609238036815 43.2649781354792 36.178547300352  
43.6726153508978 40.8873907150245 33.7818132446042 46.8613212048981  
40.2382908228517 38.9006788676407 41.8613406887824 41.0050831223107  
39.6352613956998

LOC652101 41.7397731376692 39.6995529770239 34.9849896310235  
43.1847628331565 42.7982502551634 39.7394181011603 44.0687697278114  
39.6474008369935 41.1742244762318 40.1179210534118 39.153226699662  
40.2669497398702

LOC652102 49.3463416794995 436.497820504526 1078.86166154061  
759.184121753305 40.3452320167286 42.750861693377 42.8684958525042  
49.7309743973184 36.0741672064298 34.4875013487777 35.046946054314  
37.6557714476853

LOC652111 39.7576136507593 44.5884811528117 46.3411353377615  
45.1944222548351 46.6397391251762 43.8582747295766 49.3854238365325  
48.4670130605028 45.9227107476843 45.9004543328976 41.0050831223107  
40.8681871019812

LOC652113 37.55264801907 53.1278271804774 46.1653991089885  
41.7614975630362 39.3667161654772 37.4782441311626 38.5066108855005  
41.1575777497576 38.2215591930186 40.8049408996274 38.956280281655  
42.0424641526302

LOC652115 45.2875173643252 44.5884811528117 38.4043916290561  
42.0102671859606 36.5393857306744 40.4359177791566 43.3262148375525  
36.7460922671619 37.7384958256497 42.0621425894624 43.0016969050339  
47.6040671292013

LOC652119 41.8409927585705 42.5269793679335 44.8872784170036  
41.8778873678551 42.1650127805175 48.260931742163 35.0305278582179  
38.745552403895 38.7298222155532 45.0155543555707 41.8168470823451  
46.4499258373233

LOC652126 37.9387791625384 107.951009163316 44.9758339877851  
104.528976428975 42.269054475455 44.3648993568405 42.9803717121865  
38.4540849632254 35.860430241131 42.4594149893798 44.3763859390287  
40.6614700944853

LOC652127 40.2543341073001 40.9731067463382 39.8299340037009  
36.3604951341921 37.8679241954337 39.8455060654531 43.0930293831497  
41.1575777497576 41.9635525160083 42.0621425894624 42.4580504587581  
39.5418280570561

LOC652128 41.8409927585705 42.1607322031054 41.1367478979484  
60.4646208319121 41.8806343997257 38.7340969861754 46.9929836306816  
44.2159020605784 38.1169703906207 39.5637454855233 48.8744644207821  
39.4490233720848

LOC652134 46.7293238583888 45.7979032939211 46.3411353377615  
42.6913548400127 37.3508690072156 50.0748292497578 47.2927436772465  
41.6466169548846 43.4656637536244 43.2988017098387 50.3221380889396  
40.5703581862752

LOC652139 37.0320432433314 33.1817617228171 34.6977013306396  
40.9607305725196 35.6434124419782 32.771863438151 36.3194282084339  
39.0620487644635 34.226171989766 33.6902293666089 34.266241549578  
37.4554876386402

LOC652140 43.0930293831497 41.4508241771315 41.528370959196  
44.9370339275041 42.4864576619427 35.9305494063137 43.5627649099623



42.9301944191913 44.4395580493118 45.0155543555707 40.4504608195666  
48.6795178347248  
LOC652141 32.2133093774284 39.0102066700839 46.4569566520107  
38.9534635879195 34.806104801006 41.8613406887824 42.4939802311136  
38.3684202018524 43.3744503319109 39.6719190054379 37.7384958256497  
40.7704587752083  
LOC652142 41.8409927585705 41.6466169548846 42.5406888281114  
45.0798408927912 44.0451487108213 37.0180934800573 42.357910063876  
43.1567024035183 43.0930293831497 44.2580151149956 42.0750889188255  
40.8681871019812  
LOC652147 37.9387791625384 36.7976562409506 39.5450079747895  
39.853175885492 30.3212695028233 37.3799542961839 39.7576136507593  
34.6977013306396 35.9645119596869 38.3092241935352 37.9946685306274  
30.7315474127249  
LOC652148 35.8208542506595 43.3458769998118 42.5406888281114  
40.646702696033 39.6535880152834 40.040778349137 34.6720534245631  
40.931294690669 35.5220586859301 44.7958122466628 41.2598458726002  
38.4330755397458  
LOC652150 36.0144420013819 47.8400694856726 43.4709415392696  
40.3180310664156 34.1686574241133 43.3785777889265 40.3302268293707  
42.8482181313226 38.1169703906207 42.1622837416589 45.5707650534259  
45.5800840647989  
LOC652152 46.5549623118323 43.7644428186265 41.785676764591  
48.1662933382789 41.3755760434934 43.2805590023412 46.9929836306816  
39.9576138799997 39.0775870687758 40.6022003765153 41.6336636285875  
40.3691324547049  
LOC652153 38.7537364570873 44.9370339275041 46.5650556481721  
48.309866878365 42.7107928951766 41.159706131351 54.339958888486  
43.9366081640576 45.4799270968969 34.4875013487777 37.1059647239814  
48.3648494350286  
LOC652155 46.5549623118323 47.8400694856726 41.6079958749402  
42.4580504587581 45.5809132232681 37.0180934800573 43.0930293831497  
41.1575777497576 42.357910063876 39.1621898366355 37.0180934800573  
46.0633179231318  
LOC652156 34.4896350146096 39.9697332660833 45.6989664108554  
41.4273122914951 37.956732373465 42.0574848021044 42.8684958525042  
38.745552403895 45.6582729799009 37.1275334308172 36.2435874904689  
42.0424641526302  
LOC652160 47.7267190613906 45.8669209716694 40.6737160001291  
41.0726336841311 41.8806343997257 45.8325181856483 48.3411413510851  
42.9301944191913 44.619512785899 39.4710743516517 43.844855336215  
48.4535991392809  
LOC652161 47.1962846565261 46.7591817286632 44.9758339877851  
47.8164193292842 44.147557390293 41.8613406887824 41.253645578517  
45.4757965005055 40.5912213523345 48.4890615340603 43.6629145624937  
44.4475838947656  
LOC652163 32.742439449766 36.0366673493555 36.9795961564828  
38.745552403895 44.8897737954573 45.8325181856483 40.6750540874299  
43.6434576713809 38.8271346375425 35.4990901121893 41.2598458726002  
37.6557714476853  
LOC652164 47.9175508887533 39.1982470626863 43.0016969050339  
39.066284740632 42.7107928951766 39.2985791324641 43.0930293831497  
41.2551966132486 37.8319142847141 37.4302011516587 38.1835938174625  
36.449101775775

LOC652168 40.5654775358427 36.5219488315447 47.2055133646385  
41.5464765641928 40.148780650831 39.132725377815 39.6535880152834  
41.7419877611072 38.4344387289956 44.3648993568405 39.3667161654772  
44.5432192783161

LOC652173 34.4021554788966 41.2598458726002 42.3536549114165  
48.665578118898 41.0885562160946 36.2768299545794 35.0305278582179  
45.8669209716694 41.1742244762318 39.2623423164488 41.8168470823451  
45.1735152121056

LOC652175 42.8036731479932 36.6002100641539 40.301483914446  
48.309866878365 39.7568367479301 37.1317006162938 36.7356360093603  
44.1311654985682 48.4869909888679 35.0082729554459 36.8282383070068  
33.5578650644246

LOC652179 38.1169703906207 36.9994058279362 41.6977706798234  
42.0102671859606 32.9756367838345 43.9724628401189 35.8227939208521  
37.2237132058632 38.8271346375425 38.4187686307607 42.6366765186182  
37.1747156131306

LOC652183 38.0089018744739 48.3077814647455 35.9305494063137  
31.4228928703009 36.2048942610546 30.3383368296776 40.9157352260901  
30.7606118575469 58.0722340887264 37.0320432433314 38.4689132737495  
45.0035308952466

LOC652184 48.8333989709933 111.77505926669 127.160252453685  
62.8201270538435 67.6011992144113 48.9826868640753 59.8273072817267  
45.1714698794331 86.1741504863717 43.2988017098387 50.8826620053386  
63.0266170942566

LOC652185 45.0985088502363 44.2630383225933 39.7411455670172  
44.0451487108213 39.3667161654772 37.8102105794655 38.1793598983615  
43.844855336215 40.3316153483289 37.0320432433314 39.8184668132023  
41.6550823405646

LOC652190 44.3355304829989 38.7344853699576 39.5450079747895  
34.5425384901279 42.7107928951766 37.4782441311626 43.4544762830742  
43.0390857698452 35.5220586859301 38.2069499294002 38.956280281655  
35.8429598823818

LOC652191 44.2350046179299 35.3307157989724 38.8775560911841  
38.5252456306656 37.8679241954337 37.4782441311626 39.4600924554505  
37.4484310268909 39.1790517315259 46.2286164776607 37.5583886316038  
37.3600014814388

LOC652195 50.315768338317 40.3384318592985 45.063792968927  
52.1201052574162 43.7517118200398 41.4508241771315 44.8643898647322  
44.6107027295193 47.0804681460898 48.0211752672327 40.2649309204478  
43.7672102682067

LOC652197 37.8386378737561 41.2598458726002 40.1985790927248  
40.8681871019812 40.3452320167286 41.4508241771315 47.7390230243778  
42.7431359850339 46.0106098064475 42.0621425894624 41.8168470823451  
43.0930293831497

LOC652200 41.1523487516364 45.5842286511645 34.6977013306396  
39.5050383901884 43.844855336215 46.7800033479223 37.0564573649223  
37.0390589468421 38.7298222155532 43.2988017098387 40.0766543123257  
40.0557788909923

LOC652202 37.6397652536077 38.6414316877471 39.4710743516517  
42.9358255168086 41.467005949568 37.5887129572848 41.0381860307445  
39.7509165247419 38.8271346375425 43.4885245598939 38.956280281655  
44.7401523707775

LOC652203 38.385865183581 40.3384318592985 38.7745734037492  
40.4359177791566 44.5668141895992 40.3357777530419 39.4600924554505

34.3865306339645 42.357910063876 36.3612409063792 36.3390947880186  
38.2350720635382  
LOC652204 40.8681871019812 40.7952353240579 38.0452862258803  
42.6913548400127 34.6227169056411 36.1190722948669 43.9450023643394  
35.5798430594271 39.2809305246091 42.6793753550854 47.1477056711335  
42.357910063876  
LOC652209 43.5710871617107 40.7952353240579 41.2365089689635  
41.3027031037343 46.8674366115656 43.3785777889265 43.1931731665131  
35.5798430594271 38.1169703906207 44.6918600441328 39.4410515050885  
42.4607795638552  
LOC652211 42.1537476443423 43.0227387991135 48.0191002461099  
43.4410741327254 47.0954207417646 42.0574848021044 39.1539892144371  
40.7311497914871 41.4636047919453 44.3648993568405 45.310660704531  
45.9693232070002  
LOC652213 39.8662795144616 49.5443425465542 45.063792968927  
37.4223289687135 41.2740822675592 41.9543948167375 39.8695929627783  
43.6434576713809 41.2870505273664 40.8049408996274 40.723990462047  
40.0557788909923  
LOC652215 37.1485601150873 32.2892762042267 31.1853651446075  
36.0481934423077 34.9062568194127 26.6357008041456 37.6036146841933  
27.4352294118391 31.7063377004409 33.1559412791294 32.2133093774284  
32.6203270051744  
LOC652216 39.0620487644635 37.3634897565502 39.3709357615493  
43.9282059368202 42.269054475455 38.8336427948187 41.253645578517  
42.4580504587581 37.6383530120621 41.2276963324981 38.6662194645633  
41.2437378488025  
LOC652217 36.4564050256915 43.3458769998118 41.437237454134  
38.6414316877471 42.1650127805175 44.3648993568405 41.5817737564592  
42.2577689927563 43.3744503319109 38.1042454705119 44.9713479185144  
38.5279745308203  
LOC652222 42.0532901689036 44.4411734611229 42.3536549114165  
38.9534635879195 39.7568367479301 37.5887129572848 35.3362091871364  
42.357910063876 40.0403898620771 38.745552403895 41.5421429082231  
44.1452943804044  
LOC652224 35.7012997405508 41.7337506166619 39.6451483836089  
40.4359177791566 31.8228237796461 40.9506062495231 39.8695929627783  
40.1474543172332 36.8127605061228 38.745552403895 36.0481934423077  
37.4554876386402  
LOC652226 82.0292880742189 50.9643363406241 49.3000844711116  
70.8835636550472 49.0828761839116 48.8744644207821 46.9929836306816  
49.2019743609873 47.1744296124496 51.3351387089044 48.042366934301  
51.138877923954  
LOC652227 43.1805016690297 45.7317208802318 39.7411455670172  
43.074472921841 48.6224651100733 53.0290605707162 47.1345949868029  
39.2672712041774 40.0403898620771 41.2276963324981 43.7585538437696  
40.2669497398702  
LOC652231 44.2350046179299 45.1694246393676 45.2313723727673  
46.7577982595088 47.6884372645373 43.6670755115848 45.3597029614942  
41.1575777497576 46.4861258030402 44.0409178714232 40.9157352260901  
42.7782216342806  
LOC652233 43.0930293831497 45.7979032939211 38.5045333213784  
43.5627649099623 45.8051846088552 43.7630587657205 40.5585676679482  
50.7364620410977 41.1742244762318 51.7594352155304 44.7114813656401  
44.0451487108213

LOC652234 43.9309845324767 41.9894412416874 42.5406888281114  
36.890925044696 43.844855336215 38.3418933808844 42.8684958525042  
38.1835938174625 42.357910063876 42.4594149893798 39.2542963855807  
37.6557714476853

LOC652235 46.0920218698606 38.2263227947189 42.2577689927563  
49.3654837541353 48.2748123114598 38.9378717994178 43.5627649099623  
43.844855336215 47.3791873993182 46.441301934328 44.6286581923295  
42.357910063876

LOC652238 35.4287975493553 34.9262464079777 39.4710743516517  
36.4564050256915 41.1868052124344 35.6125439901743 32.4466419672036  
36.43924066428 30.7315474127249 37.7315666632629 35.2339574411711  
38.2350720635382

LOC652242 37.3463875295726 39.0102066700839 39.1799070031819  
39.7411455670172 33.8558232866797 40.040778349137 41.8315602975157  
39.1652965788406 36.2733735494625 38.6454098044474 39.9070785037411  
35.8429598823818

LOC652246 39.3709357615493 41.4508241771315 40.4882741869718  
42.9358255168086 40.6723334103791 40.4359177791566 40.7910160811527  
35.5798430594271 38.4344387289956 44.0409178714232 37.9230440150891  
40.5703581862752

LOC652251 31.9222834447339 36.89524015739 34.5718473203083  
41.8778873678551 37.0526522140242 45.6129956328415 40.1235656101329  
35.9023742468744 34.8552366193358 41.5435611403119 35.9563099719284  
33.3192849177028

LOC652252 45.7356815244513 42.9358255168086 41.2365089689635  
36.1562979552173 41.3755760434934 45.8325181856483 45.4799270968969  
30.2675713925613 40.9901805728485 39.0648733099061 36.131485826118  
41.3481355128089

LOC652255 40.148780650831 41.3610369241157 47.2055133646385  
41.8778873678551 51.5888395924843 43.1826328292558 46.8613212048981  
68.0342444360948 45.4799270968969 39.4710743516517 44.2142581488029  
40.9683275553869

LOC652256 42.2455707947223 43.5873188565519 42.2577689927563  
50.8567345921473 44.147557390293 43.2805590023412 44.7255207589606  
39.4710743516517 40.7847110517594 45.0155543555707 41.5421429082231  
41.7575097298927

LOC652258 48.3814421939888 37.7384958256497 40.7620472083159  
39.6292788039793 44.3557408297309 38.1169703906207 42.357910063876  
47.2864663693787 45.4799270968969 44.7958122466628 44.553780984244  
47.1060577218993

LOC652259 43.2724556187214 43.1805016690297 49.7350276169552  
52.3004056941891 45.5809132232681 41.554942319225 50.0088611244948  
44.9977782988116 40.9901805728485 43.4885245598939 41.2598458726002  
48.0350549043063

LOC652260 38.7537364570873 46.1569135229922 36.178547300352  
39.1706564265495 42.4864576619427 34.3887641786747 41.3594868055879  
39.3709357615493 39.6609238036815 43.4885245598939 39.2542963855807  
41.9430737035925

LOC652264 44.5282181324797 49.4982025424177 46.1653991089885  
85.3754356809649 43.844855336215 49.1013967533186 42.629412460409  
52.0503062610092 51.4413099192899 49.5265949137207 47.9942520395434  
49.6629259325705

LOC652265 42.6036491382658 45.0905928998779 37.9482157381008  
34.6468794865286 46.6397391251762 39.9397419279057 40.4359177791566

40.5158867964016 38.7298222155532 41.6373771565199 38.956280281655  
37.4554876386402  
LOC652271 49.1868644496737 49.7363778831003 45.4865173433646  
47.481302504066 65.0605897122361 49.4157684139858 42.9803717121865  
49.9332280449549 51.5229124652769 41.3321861371202 56.9320717885002  
42.357910063876  
LOC652272 46.1673159982664 39.1982470626863 42.0621425894624  
48.4916117779992 40.9950639693255 44.5544727111028 43.9450023643394  
43.1567024035183 42.2577689927563 43.4885245598939 43.3085358214154  
41.7575097298927  
LOC652274 38.957687788868 38.1312950900467 41.6079958749402  
41.5464765641928 42.0709558258414 38.1169703906207 43.1931731665131  
34.1806289878747 39.7537274655115 40.1179210534118 38.8507804383261  
36.9976231206067  
LOC652278 43.2724556187214 43.0971787292711 48.8100349749783  
44.7980740332174 45.1137938810047 49.641159251878 42.8684958525042  
49.8344973836834 46.4164127487052 43.7303813515864 41.6336636285875  
39.6352613956998  
LOC652281 41.1523487516364 40.5400384479766 41.8751578329365  
41.8778873678551 42.269054475455 42.5660695551615 43.1931731665131  
41.3506832276112 37.9273653326866 52.7972156492746 39.8184668132023  
45.2783024981315  
LOC652282 43.5710871617107 43.3458769998118 41.6977706798234  
40.3180310664156 45.2556760873335 41.7627910693483 40.4359177791566  
42.2577689927563 41.4636047919453 45.1569741609597 36.0481934423077  
42.4607795638552  
LOC652286 42.5193208629123 42.6939394537076 39.9101908547397  
47.6687908290818 44.6834648302383 40.7616966228404 46.4388841354122  
46.2779564481158 42.6366765186182 45.3530683538086 43.1931731665131  
44.6484005362281  
LOC652287 51.413025495745 47.8400694856726 42.9104454767916  
45.0798408927912 45.9104478407175 46.6872654833579 44.2166118829877  
36.0306975524309 50.4974478884077 47.2299678280724 39.153226699662  
44.2527566343661  
LOC652288 37.55264801907 39.5050383901884 37.7384958256497  
39.1706564265495 35.1411239266238 40.5281496800812 41.0381860307445  
34.6977013306396 46.581796165231 39.4710743516517 39.3667161654772  
41.1554481567603  
LOC652290 31.6557652929457 38.3322849790657 42.3536549114165  
34.2080003860523 43.1252272136667 35.6125439901743 37.0564573649223  
36.7460922671619 37.3600014814388 35.4990901121893 37.2892641289258  
38.5279745308203  
LOC652292 39.9697332660833 39.6995529770239 38.1421709520616  
37.29566077996 38.745552403895 35.9305494063137 39.3585350448719  
38.8495095797881 38.0213051227859 37.5343260962758 36.2435874904689  
41.0657892043496  
LOC652294 40.2543341073001 48.3699741879723 38.8775560911841  
39.853175885492 39.9697332660833 36.6271061451613 35.4623691645629  
40.6171774724171 44.3440839686558 37.920964499903 45.4799270968969  
36.3454320848591  
LOC652298 43.2724556187214 31.7645650530049 41.6079958749402  
34.3595588146954 37.1565984182084 49.4157684139858 34.5633623842083  
37.86982638952 43.5669306063196 44.571915452417 35.860430241131  
36.8690774823319

LOC652300 42.6036491382658 43.4396866157171 43.0016969050339  
50.8567345921473 42.9090346219023 41.6590564937735 42.357910063876  
41.7419877611072 45.0997987980157 43.7303813515864 41.9908237694988  
34.4570158133896

LOC652305 43.5710871617107 43.1805016690297 40.0998167098057  
41.6564075217517 41.7929491793697 43.1826328292558 41.253645578517  
36.2539950294089 40.0403898620771 43.1839109702714 38.5668610487033  
36.2582325396375

LOC652317 43.1805016690297 39.8695929627783 41.528370959196  
35.7674462337723 37.7576900881741 39.9397419279057 39.6535880152834  
39.5466975353131 35.9645119596869 41.5435611403119 40.723990462047  
36.449101775775

LOC652322 42.9104454767916 36.2103905554984 47.0055981216687  
40.646702696033 40.0599807618105 37.7000400506818 37.9430145836712  
40.3357777530419 42.992884918158 38.8507804383261 34.3633615460307  
38.2350720635382

LOC652324 62.3042205863409 68.0388928513985 64.7318794662958  
44.0451487108213 99.4458090623294 56.2736599756843 70.5534237141767  
80.1144023887293 75.4572860692649 65.0928075335306 60.8662233098324  
66.8026147385682

LOC652326 47.5647821785529 44.2105195734073 46.0727230219512  
42.1273928203021 45.4751076037511 43.4681646416585 45.3597029614942  
37.9837233601316 42.992884918158 39.6719190054379 46.7386599624801  
42.8864415494484

LOC652327 42.6036491382658 40.8880530359822 38.6005272730664  
43.9282059368202 41.5668884168669 47.2009420656854 42.357910063876  
45.642304356051 42.6366765186182 48.0211752672327 45.9104478407175  
44.2527566343661

LOC652331 46.7293238583888 36.4002279956519 36.769073068743  
36.7892997857376 44.5668141895992 36.4986986135769 37.9430145836712  
43.7396619462033 37.3600014814388 39.2623423164488 44.2925355984056  
44.7401523707775

LOC652335 42.9104454767916 40.2493681589104 47.0940613507321  
52.1201052574162 40.2449343247539 44.3648993568405 42.4939802311136  
42.6450179841129 43.1805016690297 39.0648733099061 41.9908237694988  
41.9430737035925

LOC652341 37.1485601150873 34.2618170189676 35.3649449469275  
41.6564075217517 32.2133093774284 36.6271061451613 36.197424053556  
33.5578650644246 32.8704945047196 29.0303154053123 39.9070785037411  
37.2810767789306

LOC652342 42.5193208629123 42.1607322031054 43.5710871617107  
41.1886975241176 58.5450868286167 52.2089306840125 39.7576136507593  
42.357910063876 41.7627910693483 45.1569741609597 47.9942520395434  
42.1537476443423

LOC652344 41.7397731376692 36.3110701990588 37.9482157381008  
40.7481155008596 36.9060997041453 48.6621527194963 37.7136011474903  
42.7431359850339 43.5669306063196 39.7835513496873 39.4410515050885  
38.1421709520616

LOC652349 39.3709357615493 40.5400384479766 44.2405728317107  
40.646702696033 41.2740822675592 43.5752393599169 43.6753843488695  
48.1591264215184 46.9739160257217 45.2556760873335 35.7953070087288  
43.5738557773903

LOC652350 44.436995101921 39.0102066700839 45.989212296035  
42.357910063876 41.8806343997257 40.3357777530419 40.0052661202207

44.6107027295193 42.357910063876 44.2580151149956 43.844855336215  
46.1592873342534  
LOC652353 48.3814421939888 45.0905928998779 41.437237454134  
45.8844325913247 44.3557408297309 43.4681646416585 43.3262148375525  
42.2577689927563 43.5669306063196 38.4187686307607 43.0016969050339  
46.6397391251762  
LOC652354 39.7576136507593 34.2618170189676 38.7745734037492  
35.3829784221072 41.8806343997257 32.9046688061235 42.9803717121865  
41.7419877611072 40.137818555383 46.441301934328 40.3452320167286  
41.4508241771315  
LOC652355 35.8208542506595 37.6383530120621 35.5833299694641  
35.3457527182429 35.6434124419782 38.4330755397458 35.7055410599146  
38.6088282130727 36.4816715148518 35.3348367205944 33.9478220100351  
33.2715481910159  
LOC652357 37.6397652536077 37.2810767789306 40.0998167098057  
42.9358255168086 43.6587492470348 45.6129956328415 40.5585676679482  
44.2159020605784 42.4540072551568 45.1569741609597 39.5399188536544  
41.5536168238478  
LOC652367 48.1952521496489 41.4508241771315 41.785676764591  
45.4634652319753 44.2607789091176 42.4580504587581 48.9826868640753  
48.4670130605028 44.4395580493118 44.1379638573455 46.972521499515  
45.4799270968969  
LOC652368 38.957687788868 43.0227387991135 43.5710871617107  
40.0698728584484 40.148780650831 38.6414316877471 42.1607322031054  
41.9315419791594 38.7298222155532 48.0211752672327 43.4709415392696  
41.1554481567603  
LOC652369 38.8561375693335 39.0102066700839 40.1985790927248  
37.9875302985336 38.8456942580061 36.0306975524309 38.7337086062875  
40.3357777530419 34.8552366193358 38.4187686307607 40.3452320167286  
29.7878371181841  
LOC652373 44.2350046179299 48.109747794187 42.7303139017786  
43.074472921841 39.7568367479301 43.2805590023412 46.5650556481721  
44.797320243931 43.7630587657205 42.3606390470387 39.7342718293432  
44.1452943804044  
LOC652377 56.121460370892 46.7591817286632 46.3411353377615  
63.0153175111747 52.2089306840125 111.404796541459 39.7576136507593  
46.3685439301234 47.7086093893038 55.6865353018811 68.7091708087448  
52.1918130336397  
LOC652379 38.957687788868 41.2598458726002 46.6588655218735  
46.4555908533915 44.6834648302383 45.4882438975269 49.3854238365325  
43.1567024035183 42.2577689927563 40.5090849993014 45.2265319826548  
39.2469742642337  
LOC652383 37.2474303302343 39.3999056968598 36.769073068743  
40.5484717678957 40.6723334103791 44.3648993568405 36.634024014558  
39.853866204927 39.4762546236449 38.4187686307607 32.9879066304034  
46.6397391251762  
LOC652388 60.0793579902362 97.712117589297 126.911056987607  
84.4422623834916 120.465621774337 75.1674447943072 70.1184116246724  
47.8947595316832 78.6048653630165 47.2299678280724 48.3847843498476  
62.5447504571181  
LOC652389 46.7293238583888 46.5650556481721 45.7968648044613  
47.3574589211166 47.0954207417646 44.8872784170036 46.0228732507872  
44.1311654985682 49.0986627051784 42.6793753550854 46.824299585607  
42.1537476443423

LOC652392 43.3638918705225 42.8542642792862 40.8420925848403  
43.9282059368202 40.8873907150245 40.7616966228404 34.6720534245631  
38.079222289614 40.4220196471124 42.2614524730856 40.4504608195666  
38.6454098044474

LOC652396 44.9896851005259 41.3610369241157 41.528370959196  
40.9607305725196 42.1650127805175 41.9543948167375 44.8643898647322  
40.931294690669 38.5252456306656 44.3648993568405 39.5399188536544  
42.7782216342806

LOC652400 50.315768338317 49.7363778831003 51.9214790114499  
57.2856683017619 47.4548471240051 39.8455060654531 52.4111687156893  
41.2551966132486 42.5406888281114 44.0409178714232 38.1835938174625  
46.5650556481721

LOC652401 44.8914371498528 40.148780650831 42.4580504587581  
49.5424425850549 40.148780650831 43.6670755115848 42.7431359850339  
42.0494116081998 37.2810767789306 40.2112371512838 52.1788489555942  
42.4607795638552

LOC652404 42.1537476443423 46.4385386401326 41.3366779545815  
46.4555908533915 47.6884372645373 41.6590564937735 40.3302268293707  
44.293922970134 40.137818555383 50.0564735608363 38.4689132737495  
45.6692241948108

LOC652405 37.6397652536077 37.6383530120621 38.6005272730664  
40.8681871019812 42.6022652963326 37.0180934800573 38.6243997507646  
31.5151915411476 36.8127605061228 44.1379638573455 39.2542963855807  
46.0633179231318

LOC652408 44.7915315085948 40.9731067463382 46.6588655218735  
43.1847628331565 45.9104478407175 54.3478800757394 44.3440839686558  
39.7509165247419 41.4636047919453 42.785429206422 49.6706535876636  
42.8864415494484

LOC652416 45.5758521267508 48.4980626712175 43.8495248991589  
41.0726336841311 38.2496050953547 37.1317006162938 39.3585350448719  
36.0306975524309 44.3440839686558 46.325232414659 55.3147456054175  
42.0424641526302

LOC652417 44.6231541342 42.0709558258414 50.0748292497578  
42.5664883002833 43.6587492470348 46.6872654833579 42.9803717121865  
48.7814131120945 43.4656637536244 39.0648733099061 43.5710871617107  
46.6397391251762

LOC652418 45.6517320730042 37.6383530120621 42.5406888281114  
39.3750969348308 42.7107928951766 43.8582747295766 43.8206425661746  
38.3684202018524 41.4636047919453 42.785429206422 44.8872784170036  
42.8864415494484

LOC652424 49.540449125788 37.920964499903 46.9040704638073  
47.9915414951747 41.2740822675592 42.6575535390785 43.8206425661746  
43.4544762830742 37.9273653326866 46.7646877499666 45.6348103033479  
47.1060577218993

LOC652427 52.5792653122861 43.9421822132391 49.4573631027613  
39.853175885492 48.6224651100733 47.7556758818053 43.6753843488695  
48.5681478665796 42.4540072551568 46.325232414659 49.1868644496737  
45.1735152121056

LOC652433 42.1537476443423 40.4359177791566 40.8420925848403  
39.6292788039793 39.6535880152834 41.159706131351 41.3594868055879  
36.6452480995946 40.5912213523345 39.4710743516517 39.3667161654772  
43.4709415392696

LOC652435 35.8208542506595 37.7384958256497 39.7411455670172  
40.0698728584484 45.5809132232681 40.244271403831 44.4639405506967



38.1835938174625 37.0126425326534 37.920964499903 37.4642807402741  
43.5738557773903  
LOC652436 43.1805016690297 45.5842286511645 42.3536549114165  
43.6726153508978 40.5710637884029 39.6251842352088 41.253645578517  
36.43924066428 43.2761454096265 41.2276963324981 39.7342718293432  
48.5123041297835  
LOC652437 32.5418171758086 36.1232327599945 37.3687900733549  
40.4359177791566 35.0181575202066 36.9060997041453 36.197424053556  
35.9023742468744 35.4332080966594 34.5718473203083 33.5370783156523  
37.1747156131306  
LOC652438 43.3638918705225 41.2598458726002 42.4890076400051  
42.6913548400127 42.8510579683751 40.1930209223556 41.0381860307445  
40.7311497914871 48.6171311968573 40.5090849993014 44.5878355090414  
39.9941474864076  
LOC652439 31.3422392302759 35.8227939208521 42.8270038153139  
36.890925044696 40.148780650831 36.2768299545794 35.4623691645629  
41.7419877611072 36.7267557061938 37.2089297656361 38.6662194645633  
37.3600014814388  
LOC652441 30.1388203764747 35.5310164682026 37.5597671487621  
40.9607305725196 35.9058393060637 33.4492509999281 39.4600924554505  
40.1474543172332 36.0741672064298 37.1275334308172 37.5583886316038  
40.1700117452801  
LOC652448 40.0557788909923 42.9358255168086 36.0306975524309  
34.5425384901279 41.467005949568 42.5660695551615 44.2166118829877  
41.7419877611072 40.5912213523345 39.4710743516517 40.3452320167286  
42.357910063876  
LOC652450 48.0201377454632 45.4143854024453 40.6737160001291  
46.8954576545929 37.1565984182084 40.4359177791566 39.0458123429605  
45.7476095696859 40.8970401536578 42.2614524730856 37.9946685306274  
39.8497227447888  
LOC652451 38.6454098044474 38.3322849790657 41.9666541498638  
40.646702696033 40.6723334103791 36.6996187567892 48.3411413510851  
45.642304356051 43.2761454096265 38.745552403895 43.6629145624937  
39.7411455670172  
LOC652453 36.5393857306744 42.3550738181144 36.3604951341921  
42.1273928203021 39.0564222526273 37.8102105794655 38.941855825269  
45.3872406432794 45.9227107476843 40.8049408996274 34.8383995317036  
39.9519547348106  
LOC652454 38.2083710281545 43.5182502375207 36.4564050256915  
37.8442841690502 37.956732373465 40.1428591998404 35.2163900400329  
39.5466975353131 34.9428206949566 34.2638875325204 34.4716904283753  
36.449101775775  
LOC652455 48.0201377454632 65.084620579901 68.3234331335073  
61.0845101400379 58.2780916793348 78.1952428431942 61.6544855697851  
56.4779645313958 59.9770720847728 47.7180816682562 50.0808824383821  
57.1441484662045  
LOC652456 50.379587451669 45.0905928998779 45.6989664108554  
46.614092935749 56.1186281675573 39.9397419279057 44.3440839686558  
46.2779564481158 47.0804681460898 50.22432299342 45.7328341667151  
42.2577689927563  
LOC652458 62.3042205863409 63.8399092891728 61.5824518349507  
63.6334154351075 59.8102324370568 80.5478617156852 53.1884505015411  
56.2441895183416 69.734208465775 43.4885245598939 53.4088637045445  
59.9326265577462

LOC652460 39.3709357615493 39.0102066700839 45.8844325913247  
40.3180310664156 45.4751076037511 46.1513019317765 39.6535880152834  
35.4526946152955 41.5635499110307 41.2276963324981 41.7272875295469  
39.8497227447888

LOC652463 40.5654775358427 40.4359177791566 40.301483914446  
44.4367387274922 56.2305155589239 45.9266745571724 47.1345949868029  
39.6474008369935 40.2274522635576 41.3321861371202 41.3553369544097  
39.5418280570561

LOC652466 41.9407041937973 41.9894412416874 48.2883694323339  
36.9912468186322 47.5647821785529 49.2050538150106 43.8206425661746  
40.3357777530419 45.0017158586743 38.4187686307607 42.5426057453993  
42.9887069977696

LOC652468 38.385865183581 37.4540772310118 33.553634633839  
40.8681871019812 32.8704945047196 33.2552842693684 34.1889222434768  
39.5466975353131 37.7384958256497 32.406093465115 34.174642681781  
33.0217499673686

LOC652469 40.7609952437622 46.0023068797812 43.6670755115848  
49.1786207920603 44.7829632472754 41.8613406887824 41.5817737564592  
42.8482181313226 47.27543600687 43.7303813515864 40.723990462047  
46.5650556481721

LOC652470 41.0608773166058 41.159706131351 42.5406888281114  
43.074472921841 39.4693871570028 40.244271403831 40.1235656101329  
42.7431359850339 46.1101825640108 40.8049408996274 42.2618615571566  
44.0451487108213

LOC652471 38.1169703906207 41.554942319225 39.5450079747895  
41.3027031037343 43.7517118200398 41.554942319225 41.706879587091  
38.8495095797881 39.5806465938526 39.2623423164488 44.1148826235374  
42.8864415494484

LOC652472 36.7356360093603 39.6995529770239 37.3687900733549  
40.5484717678957 37.7576900881741 41.7627910693483 36.9355798143571  
38.5457716679071 38.9006788676407 37.2089297656361 37.5583886316038  
40.7704587752083

LOC652476 38.8561375693335 40.9731067463382 38.1421709520616  
40.8681871019812 43.9450023643394 34.1806289878747 46.1634822993009  
42.6450179841129 44.2607789091176 39.9948390976317 43.0971787292711  
43.6753843488695

LOC652479 47.8249696958403 48.4497719907777 46.7508829977587  
93.9228336493696 54.802736966312 52.1024135605001 60.2399886747451  
46.7980335276155 42.992884918158 46.325232414659 41.6336636285875  
45.0035308952466

LOC652481 163.877163712385 141.055218279065 158.862722884436  
128.38299874379 213.590067519021 153.992331037033 200.41782363596  
94.2678678253657 158.613823276652 73.2445837559745 72.768998788927  
133.151333210366

LOC652483 40.5654775358427 36.6968906669565 35.2101597814352  
35.9521941716188 40.5710637884029 37.8102105794655 33.7574445386307  
41.8417024632349 33.8558232866797 38.957687788868 33.5370783156523  
35.7451401627836

LOC652489 151.344720108793 159.324902145777 154.509548705054  
164.757702308188 161.422918681934 160.733526836282 189.80672643731  
117.723425661764 159.416887501941 72.6549171886783 95.2915739972533  
197.660480001139

LOC652490 41.4508241771315 44.5884811528117 42.7303139017786  
43.5627649099623 48.2748123114598 41.4508241771315 38.2933870238743

43.3262148375525 39.3750969348308 40.7063426028871 41.9083581529276  
41.6550823405646  
LOC652491 42.1537476443423 37.4540772310118 42.157627240486  
44.4367387274922 40.7779767565889 42.9695585740813 40.0052661202207  
40.7311497914871 38.9834959368496 41.7405682794166 36.5359455830388  
34.1509644696334  
LOC652492 46.5549623118323 46.7591817286632 48.4890615340603  
44.9370339275041 44.5668141895992 44.9896851005259 46.7100796279384  
43.0390857698452 51.2066664465185 51.4454142248566 42.0750889188255  
49.0655215909632  
LOC652493 237.864776225441 5971.45293864208 1928.53890809223  
9326.9018948838 56.8307116636372 119.714551585774 216.976116788572  
323.048740324895 82.0081006332668 45.5776159432079 50.7159667633757  
60.4872675915085  
LOC652495 41.2424637338424 38.3322849790657 45.3974838013476  
45.334106390212 39.2608760193011 37.9951997351435 37.3799542961839  
45.2806199505029 37.10170285405 42.5664883002833 38.3684202018524  
45.3763275588341  
LOC652499 37.4554876386402 35.8227939208521 39.3709357615493  
43.9282059368202 39.859345745831 38.6414316877471 35.2163900400329  
34.1806289878747 41.4636047919453 37.4302011516587 36.8282383070068  
34.3409660445447  
LOC652501 43.0001432913058 36.89524015739 40.7620472083159  
37.8442841690502 36.7356360093603 41.159706131351 37.9430145836712  
39.4710743516517 42.5406888281114 41.0057887014368 42.0750889188255  
39.1553169409075  
LOC652505 36.0144420013819 33.8237407699472 40.4882741869718  
37.8442841690502 39.6535880152834 41.554942319225 35.8227939208521  
37.33030683349 37.10170285405 39.5637454855233 43.7585538437696  
39.9519547348106  
LOC652508 55.0078788655089 50.0425298550559 48.2883694323339  
46.8954576545929 47.5647821785529 50.8533737532786 57.2758638871082  
45.4757965005055 46.8873421271259 50.7855742231932 50.0808824383821  
49.0655215909632  
LOC652510 39.3709357615493 41.6466169548846 36.178547300352  
41.4273122914951 38.6454098044474 40.650742261428 44.2166118829877  
41.2551966132486 41.6616444147804 36.0481934423077 45.6348103033479  
36.1647506311964  
LOC652512 39.4710743516517 41.159706131351 40.1985790927248  
42.9358255168086 55.9283039581662 44.4619248757502 43.1931731665131  
43.7396619462033 44.619512785899 38.1042454705119 50.0303076717704  
44.6484005362281  
LOC652513 47.3791873993182 43.5182502375207 44.696023817801  
41.5464765641928 39.6535880152834 33.895835691032 42.357910063876  
33.9687743313429 34.3842972343227 39.9948390976317 39.6403089864678  
39.4490233720848  
LOC652515 44.9896851005259 43.5873188565519 41.2365089689635  
40.3180310664156 44.0451487108213 42.0574848021044 42.629412460409  
40.7311497914871 43.2761454096265 37.7315666632629 42.0750889188255  
44.1452943804044  
LOC652517 31.8228237796461 37.6383530120621 34.4716904283753  
37.7469621225553 39.0564222526273 41.8613406887824 41.706879587091  
37.33030683349 36.197424053556 39.6719190054379 38.4689132737495  
40.7704587752083

LOC652519 42.8036731479932 40.6380495994768 42.640829914102  
45.5869891570251 39.4693871570028 45.3882138838137 45.4799270968969  
43.3262148375525 37.1820543575123 44.4652605017595 36.9060997041453  
39.3575468494941

LOC652522 42.5193208629123 39.8695929627783 41.3366779545815  
38.0958223740111 43.9450023643394 42.0574848021044 40.7910160811527  
42.2577689927563 44.0519245668737 41.9666541498638 42.4580504587581  
41.7575097298927

LOC652523 42.6036491382658 35.6434124419782 44.5134109184888  
42.0102671859606 44.0451487108213 39.8455060654531 44.7255207589606  
40.3357777530419 42.992884918158 43.1839109702714 45.7328341667151  
45.3763275588341

LOC652525 47.6397712007919 42.8542642792862 45.989212296035  
48.665578118898 49.32293280121 43.8582747295766 46.0228732507872  
43.844855336215 49.4786466722535 47.7180816682562 46.3370338074996  
42.6758568421347

LOC652526 40.3478825593224 38.5252456306656 38.6727842796202  
40.0698728584484 44.2607789091176 39.132725377815 43.5627649099623  
40.2382908228517 43.5669306063196 42.1622837416589 43.3085358214154  
43.6753843488695

LOC652529 45.0985088502363 39.3999056968598 44.7829632472754  
39.7411455670172 46.3150221024046 44.4619248757502 38.941855825269  
40.6171774724171 48.4869909888679 42.0621425894624 38.8507804383261  
43.5738557773903

LOC652530 43.6706764143908 42.2577689927563 47.0940613507321  
41.6564075217517 42.1650127805175 43.5752393599169 43.1931731665131  
46.9986083378817 49.0986627051784 44.6918600441328 44.9713479185144  
43.4709415392696

LOC652533 37.1485601150873 38.7344853699576 39.3709357615493  
36.264823544143 46.0043807840705 39.2985791324641 46.0228732507872  
39.9576138799997 37.3600014814388 38.3092241935352 49.9338905397767  
37.3600014814388

LOC652534 41.6354649482853 53.2046867327331 42.9104454767916  
44.9370339275041 46.6397391251762 42.9695585740813 46.9929836306816  
42.157627240486 45.3756389170606 49.1928206164702 39.5399188536544  
41.0657892043496

LOC652536 43.844855336215 38.3322849790657 41.3366779545815  
44.265834798964 37.6527901109005 40.4359177791566 35.4623691645629  
36.6452480995946 39.5806465938526 34.8137085420423 36.3390947880186  
37.3600014814388

LOC652537 44.7044140979108 46.9919960628953 48.7039705048129  
48.665578118898 47.4548471240051 47.0027453663546 41.0381860307445  
43.844855336215 49.641159251878 45.7911932481722 50.4740079109854  
46.2625470410195

LOC652540 38.5007204246293 38.7344853699576 40.301483914446  
36.1562979552173 36.6354013629791 36.4986986135769 42.2577689927563  
37.2237132058632 38.5252456306656 38.1042454705119 35.860430241131  
33.2382077236252

LOC652541 65.8306182796781 73.6855877240541 121.86893260878  
70.8835636550472 62.3233491851723 79.2701322339022 55.2088411137193  
99.5192591352063 73.4122412764173 141.960773054307 111.071209057746  
95.3145142003966

LOC652542 41.3387790895716 41.7337506166619 37.7384958256497  
37.4223289687135 39.859345745831 36.6271061451613 37.6036146841933

37.6557714476853 32.7294532998931 34.3674468322242 37.2892641289258  
36.9976231206067  
LOC652543 43.844855336215 40.8880530359822 45.310660704531  
40.8681871019812 40.5710637884029 40.244271403831 40.5585676679482  
34.064698871541 36.3649677956953 44.6918600441328 41.7272875295469  
39.9519547348106  
LOC652544 38.0089018744739 32.4552405279874 37.4642807402741  
36.4564050256915 37.4470183315826 41.3553369544097 35.7055410599146  
34.8949555140527 41.3803269429468 37.0320432433314 40.6373400186325  
40.1700117452801  
LOC652545 113.518333340953 97.4709987978999 107.251974803232  
119.833821068193 250.276530863694 181.950503247343 215.645475520124  
156.02592319461 137.658868649032 119.634256037186 154.509548705054  
161.228738711412  
LOC652547 38.385865183581 39.8695929627783 41.6977706798234  
45.4634652319753 45.5809132232681 43.6670755115848 52.4111687156893  
43.5544347011646 42.357910063876 44.571915452417 44.4688999098904  
41.6550823405646  
LOC652548 42.3433931248155 37.10170285405 32.3881195727383  
36.4564050256915 34.806104801006 35.7034203372528 37.7136011474903  
38.745552403895 34.3842972343227 32.9981302187884 34.7308008643142  
37.4554876386402  
LOC652551 37.3463875295726 40.0527893189096 38.1421709520616  
40.0698728584484 39.5595233162192 40.244271403831 37.1643693306382  
40.7311497914871 40.6957787921451 35.195364621675 34.7308008643142  
37.7526485343328  
LOC652552 41.1523487516364 46.7591817286632 49.6347864008749  
42.9358255168086 44.4489662507893 43.1826328292558 44.4639405506967  
44.293922970134 43.2761454096265 42.785429206422 39.8184668132023  
38.8495095797881  
LOC652553 40.6559419616644 46.0023068797812 44.0451487108213  
38.3166554965434 38.6454098044474 45.3882138838137 43.8206425661746  
38.8495095797881 36.6312676076142 38.8507804383261 39.9899430628542  
40.4639532172338  
LOC652554 48.5835484742456 43.2649781354792 45.4865173433646  
41.3027031037343 42.0709558258414 39.9397419279057 44.4639405506967  
39.1652965788406 41.6616444147804 44.3648993568405 41.9083581529276  
46.0633179231318  
LOC652557 43.1805016690297 46.2286164776607 43.3085358214154  
45.4634652319753 41.6806984441849 42.8598805316863 44.9863726205428  
44.5029690493211 44.3440839686558 44.1379638573455 41.0808257270221  
40.3691324547049  
LOC652562 36.5393857306744 37.1685072112618 36.8730514568925  
38.3166554965434 46.3150221024046 38.2293008890613 43.3262148375525  
42.8482181313226 42.992884918158 41.2276963324981 43.1931731665131  
41.9430737035925  
LOC652563 47.3791873993182 44.8529259387308 49.3780606970538  
52.3004056941891 47.2074332636566 38.9378717994178 42.1607322031054  
47.2009420656854 48.3119523820103 41.8613406887824 44.0409178714232  
43.0930293831497  
LOC652565 40.8681871019812 46.9919960628953 47.5673419710251  
56.7927450229377 48.6224651100733 54.2503023961401 50.6774883370457  
43.3262148375525 46.9739160257217 41.7405682794166 48.5292718280498  
42.57175366709

LOC652566 38.2083710281545 39.7835513496873 41.0356368374708  
37.1894304543751 38.745552403895 37.8102105794655 41.8315602975157  
41.4508241771315 38.4344387289956 41.3321861371202 36.43924066428  
37.9607839934735  
LOC652568 37.2474303302343 40.0527893189096 35.2101597814352  
39.6292788039793 41.9842695818285 33.895835691032 35.6056062164318  
34.2814697823693 33.6902293666089 36.9102644736882 36.43924066428  
41.863927676552  
LOC652570 34.2180669723984 32.4552405279874 31.3901365951213  
39.066284740632 31.1733235029813 36.8059561571675 36.4098694708483  
34.064698871541 34.2973261206803 31.4813677993933 34.064698871541  
35.7451401627836  
LOC652571 45.2875173643252 38.4330755397458 43.5710871617107  
45.334106390212 43.9450023643394 41.2567470068038 41.0381860307445  
42.7431359850339 42.0621425894624 43.9450023643394 43.1931731665131  
34.1509644696334  
LOC652575 38.5648843914189 37.3634897565502 40.5734458834617  
43.1847628331565 42.7107928951766 42.8598805316863 44.8643898647322  
41.7419877611072 41.5635499110307 43.0919221375514 39.5399188536544  
41.5536168238478  
LOC652577 38.304249186058 34.5023764006976 42.3536549114165  
44.1483976313959 36.3390947880186 40.040778349137 41.253645578517  
37.86982638952 37.9273653326866 43.7303813515864 38.8507804383261  
37.6557714476853  
LOC652578 44.0328992213727 41.159706131351 44.1452943804044  
46.0228732507872 40.4639532172338 45.7300501624017 38.6243997507646  
41.3506832276112 35.5220586859301 39.9948390976317 43.5710871617107  
47.1060577218993  
LOC652579 33.7777950030073 43.2649781354792 44.7829632472754  
38.5252456306656 38.3561682218911 46.8954576545929 36.7356360093603  
37.1317006162938 36.0741672064298 31.3222361955842 37.8372168909583  
43.9541718254769  
LOC652582 44.7044140979108 40.6380495994768 42.0621425894624  
44.550322123994 42.4864576619427 43.1826328292558 43.5627649099623  
44.797320243931 45.8325181856483 44.571915452417 43.3085358214154  
44.5432192783161  
LOC652585 35.5179217192467 40.6380495994768 42.0621425894624  
48.665578118898 38.745552403895 40.650742261428 37.830876898596  
39.5466975353131 34.1294694030979 39.2623423164488 41.4508241771315  
37.2810767789306  
LOC652586 40.0557788909923 42.6939394537076 38.2280071951674  
39.6292788039793 40.3452320167286 38.8336427948187 40.9157352260901  
39.9576138799997 38.6322728994674 39.6719190054379 41.1638563416981  
38.3291713594599  
LOC652587 39.1590964332473 42.4493032770053 47.9035532886869  
41.8778873678551 39.7568367479301 41.4508241771315 35.4623691645629  
39.0620487644635 41.074824727477 40.3235655331796 41.5421429082231  
39.4490233720848  
LOC652588 38.385865183581 39.8695929627783 41.437237454134  
44.4367387274922 44.2607789091176 33.895835691032 37.830876898596  
40.6171774724171 38.7298222155532 38.2069499294002 38.2795150354677  
43.2776458914333  
LOC652589 45.6517320730042 42.5269793679335 42.9104454767916  
41.7614975630362 41.7929491793697 35.4142595025086 44.4639405506967

51.1694248620208 38.7298222155532 41.1222709786153 42.6366765186182  
45.6692241948108  
LOC652593 37.9387791625384 37.7384958256497 40.1985790927248  
37.1894304543751 39.2608760193011 37.9003288112261 40.0052661202207  
38.6454098044474 40.2274522635576 40.4136535208406 40.4504608195666  
44.5432192783161  
LOC652594 37.4554876386402 32.8881500803623 40.4070046183108  
42.5664883002833 39.0564222526273 41.6590564937735 35.6056062164318  
45.9604707098953 40.2274522635576 35.7202909649682 39.5399188536544  
37.1747156131306  
LOC652595 348.862367731887 501.319993127353 269.801170545042  
215.907790093087 608.886783362316 268.097966292089 439.558287621096  
230.344359535334 427.972184856393 98.501431740607 137.484063876244  
254.199076651191  
LOC652597 45.2875173643252 34.8137085420423 39.0775870687758  
35.7674462337723 40.148780650831 48.4758590019384 37.7136011474903  
43.0390857698452 39.5806465938526 36.8059561571675 44.2142581488029  
41.7575097298927  
LOC652599 34.3473914754963 40.2493681589104 39.0775870687758  
44.7980740332174 36.08956004634 38.2293008890613 45.1017494688414  
44.293922970134 41.9635525160083 41.4397539024976 39.9899430628542  
41.6550823405646  
LOC652602 43.0930293831497 43.683792219729 42.640829914102  
45.1944222548351 40.4639532172338 38.8336427948187 45.7452456977857  
40.047314525032 45.6582729799009 38.8507804383261 41.9083581529276  
43.3744503319109  
LOC652605 41.4508241771315 44.5152708955623 40.8420925848403  
43.6726153508978 51.2525124735102 37.3799542961839 41.0381860307445  
41.5464765641928 38.9006788676407 41.5435611403119 40.8225507267584  
43.7672102682067  
LOC652606 34.5886782974123 43.5182502375207 41.437237454134  
41.8778873678551 41.5668884168669 32.2133093774284 42.9803717121865  
43.9366081640576 38.6322728994674 39.8873706855774 43.1931731665131  
39.7411455670172  
LOC652607 44.436995101921 45.4143854024453 40.8420925848403  
45.334106390212 45.1137938810047 43.1826328292558 46.4388841354122  
43.7396619462033 46.3203995372658 40.8970401536578 41.9908237694988  
52.2832912331043  
LOC652608 41.0608773166058 51.3084273211359 40.931294690669  
44.9370339275041 47.3172462673426 47.2009420656854 40.9157352260901  
41.1575777497576 45.9227107476843 49.4006068471301 42.5426057453993  
50.7487159427973  
LOC652610 40.3478825593224 40.9731067463382 43.7630587657205  
46.3203995372658 48.0234896130991 43.3785777889265 46.5650556481721  
36.7460922671619 42.2577689927563 44.7958122466628 42.6366765186182  
38.745552403895  
LOC652612 40.3478825593224 42.1607322031054 43.8495248991589  
48.1662933382789 42.7107928951766 49.7458652239071 43.8206425661746  
38.956280281655 41.1742244762318 43.9450023643394 42.4580504587581  
45.4799270968969  
LOC652614 45.4799270968969 50.4022543872993 47.3861758958576  
52.5307002738469 41.3755760434934 45.1873487463472 50.6774883370457  
43.9366081640576 43.9450023643394 43.0919221375514 43.3085358214154  
47.3992733452821

LOC652615 80.4479092568961 120.825113658705 93.1349769600388  
74.2429851177794 176.064476306748 97.152024864444 91.6978282652998  
66.7530718914083 95.9298109273155 57.4665857273093 60.7516146716018  
69.303129494807  
LOC652616 46.1673159982664 49.2050538150106 47.3861758958576  
83.2925226467532 36.3390947880186 57.8944021095265 58.6431245059655  
42.0494116081998 38.2215591930186 38.745552403895 43.3085358214154  
46.7182294568603  
LOC652618 39.1590964332473 44.5884811528117 41.1367478979484  
48.9944486068347 35.9894133432376 45.0882356578404 44.8643898647322  
41.5464765641928 46.581796165231 41.9666541498638 42.8263096141654  
41.4508241771315  
LOC652620 36.6480005877129 37.10170285405 38.3166554965434  
46.0228732507872 38.6454098044474 37.5887129572848 42.8684958525042  
40.5158867964016 41.1742244762318 37.920964499903 42.357910063876  
38.3291713594599  
LOC652623 41.0608773166058 42.2577689927563 39.991353369336  
36.4564050256915 39.9697332660833 43.5752393599169 38.4005795891396  
38.956280281655 49.4786466722535 42.2614524730856 41.8168470823451  
42.9887069977696  
LOC652624 1642.75555340648 2944.3433949897 2816.7754199004  
1752.11152588494 8545.48005557056 3602.30252142918 2559.659041589  
1455.64106630257 3602.30252142918 3244.27810937143 2663.19221471348  
3244.27810937143  
LOC652625 44.2350046179299 34.6306468196142 41.6977706798234  
41.6564075217517 42.0709558258414 39.9397419279057 47.2927436772465  
40.831207953647 40.5912213523345 41.4397539024976 37.2018803984555  
42.4607795638552  
LOC652628 46.6348258763289 44.1239711172417 46.8267540220952  
56.9299697426319 45.8051846088552 46.8954576545929 44.0687697278114  
44.6107027295193 42.7150227340364 45.4614234442527 46.2560238004757  
46.3411353377615  
LOC652629 40.7609952437622 40.5400384479766 38.4043916290561  
35.6928955245309 41.6806984441849 37.0180934800573 33.9750800030909  
41.9315419791594 39.853866204927 38.957687788868 43.0016969050339  
32.1545709776983  
LOC652630 43.6706764143908 47.2770121962655 39.7411455670172  
42.0102671859606 47.5647821785529 43.6670755115848 45.223075311113  
48.0582855095143 45.0017158586743 49.0841460667818 46.0095710163378  
46.8129509799753  
LOC652633 46.6348258763289 47.3536182445315 40.931294690669  
41.4273122914951 37.6527901109005 43.6670755115848 44.4639405506967  
36.5393857306744 41.1742244762318 48.4890615340603 45.2265319826548  
44.2527566343661  
LOC652634 47.5647821785529 47.8400694856726 41.8751578329365  
40.1804147506786 59.1948983423381 45.4882438975269 42.629412460409  
47.8947595316832 52.1788489555942 46.325232414659 44.7114813656401  
42.57175366709  
LOC652635 39.1590964332473 37.8217989841918 40.301483914446  
44.4367387274922 43.1252272136667 52.8421046802739 38.0598374201407  
39.853866204927 43.6670755115848 42.2614524730856 41.8168470823451  
41.0657892043496  
LOC652637 40.7609952437622 36.7976562409506 41.437237454134  
46.8954576545929 44.7829632472754 49.4157684139858 42.8684958525042



42.357910063876 43.4656637536244 42.1622837416589 47.3791873993182  
47.1060577218993  
LOC652640 48.3814421939888 41.554942319225 52.9111155236961  
47.8164193292842 47.0954207417646 50.2163892855092 45.3597029614942  
45.7476095696859 48.3119523820103 44.2580151149956 43.9450023643394  
44.2527566343661  
LOC652641 35.2267149016596 37.7384958256497 44.4311655729487  
44.550322123994 46.9906120932727 37.1317006162938 40.1235656101329  
44.9977782988116 39.5806465938526 36.3612409063792 37.1059647239814  
40.9683275553869  
LOC652644 40.9558083259517 42.2577689927563 46.0727230219512  
37.9875302985336 50.2163892855092 40.040778349137 51.1541843174981  
44.8997235283254 45.7452456977857 38.957687788868 42.8263096141654  
42.57175366709  
LOC652645 37.0320432433314 40.5400384479766 35.3649449469275  
38.0958223740111 35.9058393060637 38.9378717994178 40.7910160811527  
35.4526946152955 35.0305278582179 34.8137085420423 37.9230440150891  
37.0953622406687  
LOC652646 46.3390850717989 42.6022652963326 44.2405728317107  
39.9697332660833 43.1252272136667 43.3785777889265 37.2892641289258  
40.931294690669 42.5406888281114 48.0211752672327 41.9908237694988  
39.2469742642337  
LOC652647 35.2267149016596 42.6939394537076 40.6737160001291  
33.6816578730693 34.1686574241133 38.1169703906207 36.8369172900902  
32.8834169462007 32.039934894666 37.8217989841918 34.064698871541  
37.1747156131306  
LOC652651 43.5710871617107 43.5873188565519 44.0451487108213  
45.5869891570251 39.2608760193011 45.4882438975269 39.7576136507593  
43.2551508830106 39.7537274655115 41.7405682794166 46.0095710163378  
46.7182294568603  
LOC652652 45.0985088502363 45.8669209716694 50.9933795450314  
41.5464765641928 39.9697332660833 40.650742261428 44.6032218589199  
45.3872406432794 45.2897806651929 42.2614524730856 44.7114813656401  
41.2437378488025  
LOC652655 42.5193208629123 37.920964499903 44.9758339877851  
42.5664883002833 40.6723334103791 43.9724628401189 40.3302268293707  
38.956280281655 43.2761454096265 42.2614524730856 44.3763859390287  
34.3409660445447  
LOC652656 43.1805016690297 43.683792219729 41.1367478979484  
42.357910063876 39.0564222526273 34.7983399096627 42.8684958525042  
38.745552403895 43.1805016690297 42.4594149893798 38.1835938174625  
45.8546719310325  
LOC652657 44.2350046179299 42.2577689927563 49.3780606970538  
41.5464765641928 37.1565984182084 50.6360662655392 52.4111687156893  
45.5581356216957 50.5785738734431 41.1222709786153 49.319499137678  
44.7401523707775  
LOC652659 43.0930293831497 42.9358255168086 47.7737810047679  
44.4367387274922 40.4639532172338 47.0027453663546 40.7910160811527  
43.6434576713809 45.9227107476843 42.2614524730856 41.5421429082231  
46.1592873342534  
LOC652661 36.1232327599945 35.5310164682026 39.3709357615493  
39.9697332660833 43.9450023643394 37.2686490268265 41.4742337714895  
45.2806199505029 40.3316153483289 38.6454098044474 38.1835938174625  
38.3291713594599

LOC652662 44.1294459089314 40.5400384479766 43.9450023643394  
45.5869891570251 43.4544762830742 44.7804080899431 42.629412460409  
43.9366081640576 45.0997987980157 47.7180816682562 40.547835538778  
45.1735152121056  
LOC652663 48.3814421939888 39.3999056968598 47.646800205189  
45.4634652319753 43.004943518025 45.3882138838137 42.357910063876  
40.5158867964016 41.3803269429468 44.6918600441328 43.401782064778  
46.8129509799753  
LOC652664 42.0532901689036 42.9358255168086 43.0971787292711  
39.9697332660833 43.004943518025 41.9543948167375 40.4359177791566  
45.8669209716694 40.0403898620771 41.0057887014368 40.723990462047  
39.8497227447888  
LOC652667 41.4508241771315 40.4359177791566 43.5710871617107  
42.5664883002833 43.1252272136667 40.7616966228404 39.0458123429605  
42.2577689927563 44.2607789091176 44.4652605017595 43.844855336215  
36.7762265039864  
LOC652668 45.4799270968969 48.7847528954724 53.8724557170772  
47.6687908290818 46.9906120932727 47.6803619768589 38.1793598983615  
42.4580504587581 46.581796165231 52.0999467564713 47.1477056711335  
42.2577689927563  
LOC652669 41.0608773166058 40.8880530359822 47.0055981216687  
40.0698728584484 41.8806343997257 45.7300501624017 45.3597029614942  
49.5185112777773 44.4395580493118 47.3791873993182 53.5698357689852  
41.7575097298927  
LOC652670 41.7397731376692 34.5023764006976 42.9104454767916  
42.9358255168086 40.9950639693255 40.650742261428 42.4939802311136  
40.6171774724171 32.7294532998931 48.6124127998952 44.4688999098904  
41.4508241771315  
LOC652671 48.0201377454632 50.3586212130973 53.8724557170772  
52.6947911480086 44.0451487108213 39.3841861812262 54.6414321010929  
48.6441988290952 49.8304479381623 42.785429206422 46.0905079010237  
47.6938628797168  
LOC652672 111.041991642022 126.492854172749 138.81810375553  
87.4850071876743 178.881586334601 132.604567913122 156.719353642505  
126.470889051684 146.355277438643 181.545493080363 134.335592890814  
120.149188463323  
LOC652673 51.5888395924843 38.3322849790657 40.4882741869718  
41.7614975630362 44.2607789091176 40.8634043028528 40.9157352260901  
47.4740726032707 42.7150227340364 37.3179578037963 42.7275315121163  
44.1452943804044  
LOC652674 37.0320432433314 38.6414316877471 42.640829914102  
45.1944222548351 44.2607789091176 40.8634043028528 36.5352572191451  
38.956280281655 37.6383530120621 38.4187686307607 42.7275315121163  
40.6614700944853  
LOC652675 50.9381343674699 48.9259041798949 52.2132783757422  
52.6947911480086 51.2525124735102 61.6219790276408 50.3519150282938  
46.9986083378817 55.1253465069845 57.9713749600418 53.0798381965427  
57.6075177910677  
LOC652676 43.7585538437696 45.7979032939211 41.3366779545815  
38.8495095797881 43.844855336215 39.8455060654531 48.4859552186772  
42.0494116081998 38.2215591930186 42.6793753550854 47.0940613507321  
41.3481355128089  
LOC652677 37.2474303302343 39.3999056968598 40.301483914446  
34.9221408381038 36.3390947880186 40.650742261428 48.9826868640753

36.0306975524309 40.7847110517594 37.4302011516587 36.131485826118  
31.372171135652  
LOC652678 40.2543341073001 38.5252456306656 34.0382693188794  
42.6913548400127 46.0043807840705 42.0574848021044 39.3585350448719  
40.1474543172332 41.9635525160083 39.2623423164488 37.1059647239814  
42.2577689927563  
LOC652679 35.3227485563945 34.15544299189 34.2890785915814  
42.0102671859606 34.0045980663271 35.5158505219112 32.6039814489621  
31.7063377004409 32.396635964353 32.2133093774284 34.7308008643142  
37.4554876386402  
LOC652680 35.2267149016596 44.4411734611229 37.4642807402741  
35.1451084093692 36.08956004634 33.7818132446042 40.9157352260901  
37.5511560880902 37.2810767789306 33.1559412791294 34.6366195121669  
40.4639532172338  
LOC652682 46.1673159982664 38.9338521051669 42.8270038153139  
44.0451487108213 38.5512429290626 40.040778349137 39.0458123429605  
39.7509165247419 41.1742244762318 47.9056710878325 45.5707650534259  
41.5536168238478  
LOC652683 828.403901345618 44.3529919625344 49.1067959632109  
39.066284740632 45.9104478407175 42.157627240486 43.8206425661746  
41.4508241771315 41.9635525160083 48.6124127998952 45.9104478407175  
42.2577689927563  
LOC652684 49.4151347850687 42.6939394537076 45.7968648044613  
47.6687908290818 53.3086645804786 58.5530199658661 45.7452456977857  
52.6960621424156 46.3203995372658 45.5776159432079 50.7159667633757  
50.3118072462443  
LOC652685 155.872353189452 89.7093249557939 120.508644792138  
98.0023132593711 161.422918681934 88.6287852712744 96.4033477961156  
131.808634405319 136.541379502691 147.673181207232 100.586064920239  
110.223625398261  
LOC652687 42.0532901689036 45.9266745571724 45.310660704531  
49.5424425850549 43.4544762830742 48.1591264215184 54.8074655158941  
43.9366081640576 46.4164127487052 43.6033221838149 45.6348103033479  
43.0930293831497  
LOC652688 39.9697332660833 42.3550738181144 45.1569741609597  
45.1944222548351 41.3755760434934 43.1826328292558 46.9929836306816  
42.0494116081998 49.7336769474446 47.2299678280724 39.3667161654772  
48.6037684272115  
LOC652690 40.8681871019812 42.9358255168086 38.3166554965434  
37.0732977341185 39.1650142708257 40.7616966228404 43.0930293831497  
43.1567024035183 38.1169703906207 43.2988017098387 38.956280281655  
39.3575468494941  
LOC652692 37.0320432433314 44.8529259387308 46.2625470410195  
37.7469621225553 40.0599807618105 39.0266821712099 37.1643693306382  
41.6466169548846 40.0403898620771 38.528621456378 37.8372168909583  
38.0452862258803  
LOC652694 72.2099571536717 1513.74711975248 543.975237512604  
2004.94135236716 43.6587492470348 47.2009420656854 76.6094442444074  
154.829574442056 86.5616422570166 43.6033221838149 47.8284278211109  
50.8442982601142  
LOC652696 40.3478825593224 37.10170285405 47.0940613507321  
37.651298468202 42.269054475455 40.5281496800812 38.8417151851134  
33.4534810696886 40.7847110517594 43.844855336215 39.8184668132023  
39.0536056496869

LOC652697 36.4564050256915 40.9731067463382 36.4564050256915  
38.6414316877471 37.0526522140242 34.0777108441756 52.8496345990125  
33.6816578730693 40.9901805728485 35.6208308220005 47.0110068985119  
42.4607795638552

LOC652698 47.5647821785529 42.5269793679335 44.6032218589199  
41.8778873678551 50.2163892855092 46.4648868771662 39.3585350448719  
46.1673159982664 48.5792058061372 44.6918600441328 46.2560238004757  
45.3763275588341

LOC652699 43.4626049853157 45.1694246393676 41.528370959196  
40.4359177791566 42.9090346219023 45.2852528185486 42.7431359850339  
46.9986083378817 37.3600014814388 41.4397539024976 47.8284278211109  
42.1537476443423

LOC652701 35.1307934330047 40.716553247236 38.4043916290561  
37.0732977341185 40.6723334103791 42.0574848021044 38.5066108855005  
43.9366081640576 35.6139301508335 39.2623423164488 39.6403089864678  
38.6454098044474

LOC652703 40.6559419616644 44.3529919625344 37.7384958256497  
44.550322123994 44.2607789091176 44.1737502492846 39.4600924554505  
41.7419877611072 41.7627910693483 46.0119912782855 42.357910063876  
36.9976231206067

LOC652704 47.2862299990938 39.9697332660833 41.2365089689635  
38.9534635879195 41.3755760434934 53.6858208094027 44.7255207589606  
43.6434576713809 43.3744503319109 44.1379638573455 40.547835538778  
41.6550823405646

LOC652707 43.7585538437696 39.6995529770239 44.5134109184888  
40.9607305725196 39.6535880152834 45.6129956328415 41.9393838138203  
45.3872406432794 43.8482802038826 39.0648733099061 38.1835938174625  
40.4639532172338

LOC652708 39.1590964332473 37.10170285405 42.640829914102  
38.9534635879195 48.9627346956003 43.1826328292558 48.1747307200218  
42.0494116081998 42.4540072551568 40.3235655331796 41.1638563416981  
44.2527566343661

LOC652710 39.9697332660833 40.8880530359822 37.2838080935695  
32.2212308728305 36.8059561571675 38.4330755397458 40.4359177791566  
42.157627240486 40.4997186069494 38.528621456378 36.5359455830388  
45.6692241948108

LOC652712 36.7356360093603 36.3110701990588 37.3687900733549  
38.745552403895 32.325260431418 34.5886782974123 32.8745892439217  
37.0390589468421 35.2143190355414 33.0508421547252 32.5482839399637  
34.1509644696334

LOC652713 47.3791873993182 40.148780650831 52.8041782638549  
55.2214187655851 45.5809132232681 44.2607789091176 42.2577689927563  
49.9332280449549 45.0017158586743 44.1379638573455 38.2795150354677  
46.917149434588

LOC652715 39.9697332660833 41.2598458726002 44.9758339877851  
38.6414316877471 43.3332476888305 39.8455060654531 39.7576136507593  
46.5717043290731 45.9227107476843 39.9948390976317 42.4580504587581  
39.6352613956998

LOC652721 46.9939712192224 46.2286164776607 49.3780606970538  
46.4555908533915 51.3511088648386 47.6803619768589 52.0942589368478  
48.1591264215184 48.8842909466002 49.4006068471301 45.1432412071268  
46.2625470410195

LOC652722 42.7150227340364 44.3529919625344 42.9104454767916  
46.1673159982664 50.2163892855092 40.4359177791566 41.9393838138203

37.86982638952 43.3744503319109 44.0409178714232 44.7114813656401  
45.0985088502363  
LOC652726 49.085741080241 51.8610060995363 49.5424425850549  
75.0377156190383 51.6869155634183 52.1024135605001 74.5591290353333  
57.037639245179 51.8824384192988 46.5650556481721 48.8744644207821  
52.6922486991742  
LOC652730 38.2083710281545 43.5182502375207 38.3166554965434  
42.6913548400127 46.9906120932727 44.7804080899431 43.5627649099623  
45.7476095696859 44.5303781239209 52.4351670989268 42.911855821602  
43.3744503319109  
LOC652733 42.2455707947223 46.4385386401326 42.8270038153139  
40.7481155008596 40.7779767565889 42.5660695551615 47.4439407315335  
42.2577689927563 38.2215591930186 44.4652605017595 43.0016969050339  
41.7575097298927  
LOC652734 41.5421429082231 42.6022652963326 45.989212296035  
36.6501141438378 51.0107745412152 43.4681646416585 35.7055410599146  
42.8482181313226 43.4656637536244 40.2112371512838 43.3085358214154  
44.1452943804044  
LOC652735 44.3355304829989 41.8073910693411 44.4311655729487  
42.4580504587581 43.2484996523549 46.4648868771662 39.7576136507593  
42.7431359850339 39.7537274655115 45.4614234442527 46.1673159982664  
36.5474283500601  
LOC652736 36.3649677956953 42.2577689927563 42.5406888281114  
43.8002456102021 46.5557478175976 39.3841861812262 44.4639405506967  
42.7431359850339 45.5779686360641 46.441301934328 43.3085358214154  
43.8575940017119  
LOC652740 39.1590964332473 44.6918600441328 44.1452943804044  
38.3166554965434 42.7982502551634 39.8455060654531 42.1607322031054  
40.3357777530419 36.2733735494625 45.5776159432079 42.5426057453993  
44.9070250604284  
LOC652741 41.1523487516364 38.2263227947189 38.3166554965434  
35.314469458379 36.7356360093603 40.244271403831 40.5585676679482  
39.2672712041774 41.1742244762318 43.7303813515864 40.1742127891824  
42.4607795638552  
LOC652742 41.0608773166058 39.8695929627783 38.8775560911841  
36.4564050256915 38.8456942580061 40.7616966228404 38.941855825269  
43.7396619462033 42.9020321355927 36.8059561571675 38.8507804383261  
42.9887069977696  
LOC652743 44.7915315085948 37.5469247328848 38.7745734037492  
43.5627649099623 46.0043807840705 36.2768299545794 34.9344532055397  
38.2782436497441 45.3756389170606 40.8049408996274 40.9157352260901  
40.0557788909923  
LOC652745 39.5676051939342 38.5252456306656 40.7620472083159  
42.8235313007746 39.9697332660833 42.2577689927563 42.7431359850339  
38.4540849632254 42.992884918158 36.2435874904689 41.0808257270221  
46.2625470410195  
LOC652747 42.442231667357 38.7344853699576 41.6079958749402  
41.3027031037343 38.4540849632254 40.5281496800812 38.7337086062875  
40.831207953647 40.5912213523345 38.8507804383261 45.6348103033479  
35.7451401627836  
LOC652753 42.0532901689036 44.3529919625344 46.8267540220952  
40.3180310664156 43.3332476888305 42.750861693377 36.8369172900902  
43.844855336215 46.3203995372658 39.5637454855233 44.3763859390287  
41.0657892043496

LOC652755 60.2547250212462 80.0502531022254 79.4998723172096  
75.2475238554276 50.3713170502557 84.4433277732938 59.5205055437765  
55.9303347977781 62.0272989884264 63.197604174872 82.2519263268941  
57.8111054584154  
LOC652757 42.442231667357 43.3458769998118 34.5718473203083  
40.0698728584484 38.3561682218911 40.7616966228404 36.634024014558  
40.4359177791566 37.9273653326866 34.064698871541 41.0808257270221  
41.9430737035925  
LOC652759 43.0930293831497 40.8880530359822 40.8420925848403  
38.5252456306656 41.3755760434934 42.4580504587581 49.1067959632109  
37.33030683349 46.581796165231 39.4710743516517 43.7585538437696  
47.6040671292013  
LOC652760 45.7356815244513 45.8669209716694 39.2707964550441  
45.8844325913247 42.0709558258414 46.1513019317765 44.0687697278114  
45.1714698794331 44.619512785899 38.745552403895 43.3085358214154  
46.2625470410195  
LOC652761 34.1336988442837 43.8495248991589 38.4043916290561  
49.5424425850549 39.859345745831 37.9003288112261 35.6056062164318  
39.3709357615493 38.2215591930186 37.5343260962758 40.9157352260901  
39.7411455670172  
LOC652762 41.6354649482853 45.4882438975269 44.3344900481112  
50.2163892855092 40.7779767565889 48.9826868640753 52.4111687156893  
43.3262148375525 40.5912213523345 46.325232414659 42.911855821602  
40.7704587752083  
LOC652763 36.7356360093603 43.9421822132391 41.528370959196  
44.1483976313959 49.8304479381623 36.4986986135769 40.5585676679482  
43.0390857698452 38.9834959368496 40.8970401536578 47.299647867533  
43.5738557773903  
LOC652764 47.1962846565261 44.8529259387308 42.9104454767916  
43.4410741327254 40.7779767565889 42.357910063876 56.3376046940285  
45.0972184964705 43.3744503319109 43.9450023643394 42.4580504587581  
42.9887069977696  
LOC652765 35.4287975493553 38.4330755397458 45.6989664108554  
40.9607305725196 44.6834648302383 39.3841861812262 40.2154497375715  
38.5457716679071 42.4540072551568 39.3698811593364 45.390192977585  
44.7401523707775  
LOC652767 52.0299937917925 35.2143190355414 40.931294690669  
43.8002456102021 38.8456942580061 34.6977013306396 41.3594868055879  
42.5435283762933 38.3418933808844 38.8507804383261 41.1638563416981  
42.6758568421347  
LOC652768 44.9896851005259 44.2630383225933 38.6727842796202  
45.5869891570251 43.2484996523549 40.9506062495231 52.561573697155  
46.0633179231318 45.1899271235974 44.3648993568405 43.0971787292711  
40.5703581862752  
LOC652769 37.3463875295726 37.3634897565502 38.3166554965434  
34.8137085420423 34.2638875325204 38.8336427948187 40.6750540874299  
38.079222289614 39.853866204927 34.6720534245631 33.1645364749371  
40.0557788909923  
LOC652771 45.3872406432794 43.7644428186265 43.7630587657205  
45.1944222548351 44.6834648302383 40.8634043028528 51.1541843174981  
42.4580504587581 43.2761454096265 44.7958122466628 35.860430241131  
38.745552403895  
LOC652773 63.1291723738553 70.2888664894537 73.967017874248  
67.0402749076279 79.9971782971285 176.224645007435 53.3111230705754

49.5185112777773 67.646351770712 47.2299678280724 66.1229691315616  
105.05842887748  
LOC652774 42.6036491382658 38.6414316877471 40.6737160001291  
42.8235313007746 40.6723334103791 39.4953494583071 46.3057385979341  
43.7396619462033 44.7058233759912 41.9666541498638 40.1742127891824  
47.3172462673426  
LOC652775 44.436995101921 315.696895080135 77.9085946827079  
193.806701229141 41.0885562160946 38.3418933808844 82.1144251872199  
41.9315419791594 47.1744296124496 43.4885245598939 44.2925355984056  
42.6758568421347  
LOC652777 44.436995101921 37.4540772310118 47.7737810047679  
44.9370339275041 42.4864576619427 39.9397419279057 49.540449125788  
47.7889447429963 46.2027193115397 41.5435611403119 42.170702295259  
38.745552403895  
LOC652779 37.1485601150873 39.3999056968598 45.2313723727673  
40.646702696033 45.3675390992851 40.244271403831 43.0930293831497  
44.5029690493211 44.0519245668737 46.0119912782855 33.6080693875435  
38.8495095797881  
LOC652781 42.1537476443423 42.5269793679335 44.1452943804044  
47.9915414951747 42.0709558258414 44.3648993568405 39.0458123429605  
38.6454098044474 41.1742244762318 39.8873706855774 42.170702295259  
41.0657892043496  
LOC652783 37.6397652536077 36.3110701990588 46.2625470410195  
36.7892997857376 37.4470183315826 35.4142595025086 37.4772922422734  
38.4540849632254 42.1594905198929 37.8217989841918 38.079222289614  
33.939263369489  
LOC652784 37.8386378737561 46.6996902348633 37.2838080935695  
41.3027031037343 35.2163900400329 47.0027453663546 35.7055410599146  
34.9580369221164 39.9444191873552 40.5090849993014 41.1638563416981  
46.0633179231318  
LOC652786 33.5994525227062 42.2577689927563 47.9035532886869  
41.4273122914951 35.2163900400329 35.5158505219112 40.3302268293707  
39.6474008369935 35.1155486926999 39.3698811593364 37.0180934800573  
40.9683275553869  
LOC652787 36.5393857306744 42.5269793679335 41.785676764591  
46.0228732507872 40.8873907150245 37.0180934800573 40.7910160811527  
40.047314525032 40.137818555383 40.8970401536578 39.9899430628542  
39.2469742642337  
LOC652789 43.0930293831497 44.5152708955623 44.4311655729487  
52.6947911480086 49.9493230064613 41.7627910693483 47.8947595316832  
43.3262148375525 48.0163377492228 44.6918600441328 44.4688999098904  
41.4508241771315  
LOC652790 46.8954576545929 48.4497719907777 46.7508829977587  
45.334106390212 47.9128504683618 52.4351670989268 50.6774883370457  
55.3122077514658 50.9010149857308 51.0055825931636 52.6960621424156  
50.2163892855092  
LOC652792 42.7150227340364 41.159706131351 34.3633615460307  
44.7980740332174 38.9496515344837 40.1428591998404 40.7910160811527  
45.1714698794331 39.3750969348308 41.4397539024976 46.0905079010237  
41.7575097298927  
LOC652793 44.3355304829989 41.6466169548846 33.4240466670776  
40.4359177791566 42.1650127805175 38.2293008890613 40.9157352260901  
41.6466169548846 41.7627910693483 38.6454098044474 38.5668610487033  
43.4709415392696

LOC652796 40.3478825593224 45.0905928998779 42.0621425894624  
39.853175885492 41.6806984441849 41.0582900711341 34.9344532055397  
41.2551966132486 40.9901805728485 39.9948390976317 37.0180934800573  
33.6902293666089

LOC652797 43.7585538437696 41.4508241771315 44.6032218589199  
43.6726153508978 44.3557408297309 37.5887129572848 48.3411413510851  
35.3608605269276 50.7619345314571 42.0621425894624 42.7275315121163  
46.917149434588

LOC652798 38.1169703906207 41.3610369241157 38.8775560911841  
39.1706564265495 46.0977687311222 40.3357777530419 35.4623691645629  
39.2672712041774 42.5406888281114 40.3235655331796 36.7283081422707  
39.2469742642337

LOC652799 35.7012997405508 44.0409178714232 36.9795961564828  
37.8442841690502 38.745552403895 37.5887129572848 37.9430145836712  
41.2551966132486 43.7630587657205 38.957687788868 36.131485826118  
36.7762265039864

LOC652800 43.5710871617107 44.2630383225933 46.7508829977587  
41.8778873678551 42.269054475455 44.7804080899431 50.0088611244948  
43.6434576713809 42.6366765186182 45.3530683538086 43.6629145624937  
44.1452943804044

LOC652801 38.6454098044474 42.0709558258414 48.1331309338997  
44.1483976313959 41.5668884168669 40.040778349137 38.0598374201407  
43.844855336215 45.9227107476843 43.4885245598939 36.7283081422707  
37.4554876386402

LOC652802 41.3387790895716 36.6002100641539 36.2683886571585  
37.8442841690502 35.4484652445078 31.3901365951213 36.9355798143571  
39.3709357615493 41.9635525160083 43.4885245598939 36.6298807161755  
36.2582325396375

LOC652803 44.7915315085948 38.2263227947189 39.991353369336  
37.8442841690502 39.9697332660833 35.2067831864574 42.4939802311136  
37.86982638952 40.3316153483289 42.3606390470387 42.8263096141654  
43.1805016690297

LOC652804 46.3390850717989 41.2598458726002 40.301483914446  
44.4367387274922 45.1137938810047 41.7627910693483 40.9157352260901  
41.0381860307445 37.4540772310118 41.8613406887824 38.3684202018524  
44.1452943804044

LOC652805 38.957687788868 35.9305494063137 34.8956628705329  
40.0698728584484 36.9060997041453 35.0970060242246 33.8558232866797  
36.3405039629059 33.802253812079 39.9948390976317 31.3142073726046  
42.6758568421347

LOC652806 46.0920218698606 44.5152708955623 44.1452943804044  
40.7481155008596 50.0580547772867 46.7800033479223 47.2927436772465  
46.0633179231318 46.581796165231 44.2580151149956 44.4688999098904  
45.6692241948108

LOC652808 38.7537364570873 44.4411734611229 46.0727230219512  
37.1894304543751 41.6806984441849 36.4986986135769 36.634024014558  
42.2577689927563 48.8067321016961 40.7063426028871 40.3452320167286  
41.6550823405646

LOC652809 44.8914371498528 41.8848959280916 39.5450079747895  
40.9607305725196 38.5512429290626 38.1169703906207 38.1793598983615  
42.357910063876 45.3756389170606 43.7303813515864 43.0971787292711  
40.2669497398702

LOC652811 40.6559419616644 34.15544299189 41.1367478979484  
38.745552403895 45.2556760873335 42.2577689927563 40.3302268293707



40.5158867964016 38.2215591930186 41.7405682794166 39.6403089864678  
44.8372404608604  
LOC652813 38.1169703906207 43.3458769998118 35.7105247506212  
43.074472921841 35.1411239266238 41.159706131351 46.5650556481721  
41.7419877611072 45.0997987980157 39.8873706855774 39.6403089864678  
39.0536056496869  
LOC652814 49.8472708021525 40.0527893189096 42.640829914102  
44.0451487108213 38.745552403895 39.3841861812262 64.3669451425581  
87.4850071876743 51.8824384192988 55.5206840401643 49.7363778831003  
54.4313108506244  
LOC652815 61.356483470053 61.3428092991286 64.5232087947596  
45.0798408927912 70.5676924620725 59.9174456081704 42.2577689927563  
46.0633179231318 51.0062122023297 36.2435874904689 44.2925355984056  
55.7067742610401  
LOC652816 42.8036731479932 46.0713306971594 43.401782064778  
50.2163892855092 45.9104478407175 42.4580504587581 54.339958888486  
41.8417024632349 45.2897806651929 49.3000844711116 44.9713479185144  
46.8129509799753  
LOC652819 44.5282181324797 40.148780650831 41.437237454134  
38.2041059863839 39.4693871570028 39.3841861812262 54.0170817319522  
44.2159020605784 40.7847110517594 40.5090849993014 42.2618615571566  
45.0035308952466  
LOC652821 50.0466349801009 46.6996902348633 40.0998167098057  
51.7739270955254 48.3814421939888 47.2009420656854 43.6753843488695  
43.9366081640576 43.4656637536244 45.3530683538086 45.2265319826548  
50.0571060701893  
LOC652825 44.3355304829989 42.9358255168086 40.931294690669  
38.745552403895 44.0451487108213 41.2567470068038 39.5496902678788  
41.2551966132486 40.0403898620771 42.0621425894624 43.7585538437696  
41.2437378488025  
LOC652826 99.6265783263109 114.41703170676 156.53223142598  
104.8505815954 219.34503297115 111.240804216088 212.664574366477  
122.482560090133 150.925721934159 48.4890615340603 58.3586374083245  
84.1780237893807  
LOC652828 40.5654775358427 43.1805016690297 45.1569741609597  
46.614092935749 41.2740822675592 42.6575535390785 39.7576136507593  
44.9977782988116 41.3803269429468 43.844855336215 44.7114813656401  
41.4508241771315  
LOC652831 46.1673159982664 40.716553247236 37.7384958256497  
44.265834798964 43.844855336215 37.7000400506818 38.7337086062875  
37.5511560880902 40.137818555383 46.5650556481721 44.6286581923295  
42.8864415494484  
LOC652833 40.6559419616644 45.6533175604486 44.1452943804044  
46.0228732507872 40.9950639693255 40.4359177791566 42.0605906240248  
44.2159020605784 44.0519245668737 45.3530683538086 44.553780984244  
48.1627097465883  
LOC652837 44.7044140979108 43.0971787292711 41.8751578329365  
48.1662933382789 45.4751076037511 39.2985791324641 51.9421032049606  
44.797320243931 49.9162522057712 50.5252048155459 46.2560238004757  
46.8129509799753  
LOC652838 52.502055890816 55.0897019602305 54.6051538001037  
38.5252456306656 50.8875036861067 38.3418933808844 57.7805922926828  
40.931294690669 53.1249776278067 41.5435611403119 45.5707650534259  
49.9692385479389

LOC652839 43.5710871617107 47.5647821785529 42.0621425894624  
45.0798408927912 45.9104478407175 41.554942319225 40.0052661202207  
39.5466975353131 42.1594905198929 41.6373771565199 46.6442692119997  
38.1421709520616

LOC652840 38.2083710281545 45.0905928998779 39.991353369336  
40.1804147506786 36.9702228618069 36.0306975524309 40.6750540874299  
39.7509165247419 38.5252456306656 33.4316681623175 40.6373400186325  
41.1554481567603

LOC652842 39.1590964332473 39.7835513496873 38.4043916290561  
42.6913548400127 38.0598374201407 43.1826328292558 47.5963750520409  
37.33030683349 46.3203995372658 38.4187686307607 44.9713479185144  
42.2577689927563

LOC652843 44.6231541342 43.9421822132391 39.991353369336  
46.1673159982664 36.2048942610546 36.3845892764084 38.8417151851134  
44.9977782988116 39.1790517315259 41.4397539024976 43.0016969050339  
38.8495095797881

LOC652844 36.1232327599945 38.7344853699576 38.0452862258803  
35.1451084093692 40.5710637884029 38.5252456306656 37.9430145836712  
36.3405039629059 30.3212695028233 35.6208308220005 31.498275130159  
42.2577689927563

LOC652845 40.148780650831 41.7337506166619 41.2365089689635  
41.8778873678551 40.6723334103791 43.1826328292558 40.4359177791566  
43.844855336215 41.4636047919453 44.2580151149956 45.1432412071268  
42.7782216342806

LOC652846 54.8439819445945 145.607100979838 1191.93354266135  
52.5307002738469 106.125117937458 54.7083331985678 54.8074655158941  
73.746472097049 423.608694638779 83.5069968129733 118.720812623965  
171.176393131741

LOC652848 40.3478825593224 43.7644428186265 37.1643693306382  
41.5464765641928 42.3685136297603 41.9543948167375 50.5252048155459  
43.9366081640576 45.0017158586743 41.2276963324981 43.3085358214154  
40.9683275553869

LOC652849 45.2875173643252 41.6466169548846 39.8299340037009  
37.1894304543751 49.8304479381623 41.3553369544097 43.9450023643394  
39.2672712041774 40.0403898620771 41.9666541498638 37.4642807402741  
40.9683275553869

LOC652850 45.2875173643252 44.1239711172417 40.931294690669  
50.378948785456 38.8456942580061 39.8455060654531 41.9393838138203  
45.9604707098953 37.7384958256497 38.4187686307607 37.6484782516569  
41.4508241771315

LOC652854 38.5648843914189 40.0527893189096 36.8730514568925  
44.7980740332174 38.6454098044474 41.159706131351 38.0598374201407  
37.86982638952 42.0621425894624 41.3321861371202 39.7342718293432  
38.5279745308203

LOC652856 40.3478825593224 44.8529259387308 39.991353369336  
42.9358255168086 46.6397391251762 33.4492509999281 41.8315602975157  
44.7044140979108 40.4220196471124 43.844855336215 40.4504608195666  
45.7562276914441

LOC652857 40.7609952437622 40.9731067463382 40.931294690669  
38.2041059863839 42.9090346219023 38.3418933808844 42.8684958525042  
45.0972184964705 34.7722083264266 39.9948390976317 39.5399188536544  
40.3691324547049

LOC652859 41.1523487516364 36.5219488315447 38.4043916290561  
40.9607305725196 36.9702228618069 40.4359177791566 46.1634822993009

42.6450179841129 40.4997186069494 44.7958122466628 41.9908237694988  
38.5279745308203  
LOC652860 34.8099089553046 39.9697332660833 49.6347864008749  
44.7980740332174 38.8456942580061 42.357910063876 45.223075311113  
45.7476095696859 41.863927676552 43.6033221838149 42.911855821602  
47.3992733452821  
LOC652864 110.048921728774 84.8084949516218 111.573111498905  
94.5501397951415 113.929486370331 98.2843999216669 95.0190813062982  
79.4916415027015 108.098254669378 52.7972156492746 57.115361349315  
94.7008981904016  
LOC652869 39.3709357615493 39.1982470626863 36.1042012504758  
37.5382094267692 40.5710637884029 37.3799542961839 40.9157352260901  
37.9837233601316 40.137818555383 41.0057887014368 34.3633615460307  
38.745552403895  
LOC652870 37.8386378737561 39.0102066700839 41.528370959196  
43.5627649099623 41.5668884168669 44.0804700754786 50.3519150282938  
42.7431359850339 38.8271346375425 43.0919221375514 40.8225507267584  
39.3575468494941  
LOC652871 43.5710871617107 45.2556760873335 43.401782064778  
45.8844325913247 44.6834648302383 39.9397419279057 46.9929836306816  
48.1591264215184 44.2607789091176 42.9866214102525 44.2925355984056  
39.6352613956998  
LOC652874 41.1523487516364 41.554942319225 37.1643693306382  
36.4564050256915 35.4484652445078 35.9305494063137 42.1607322031054  
37.5511560880902 39.6609238036815 31.3901365951213 32.8881500803623  
38.5279745308203  
LOC652875 38.0089018744739 41.0678614026819 44.696023817801  
41.5464765641928 42.3685136297603 36.4986986135769 35.3362091871364  
44.0390019242862 36.5393857306744 43.2988017098387 40.3452320167286  
41.5536168238478  
LOC652876 41.5421429082231 39.3999056968598 47.2055133646385  
44.7980740332174 51.0107745412152 45.1873487463472 47.4439407315335  
45.0972184964705 44.2607789091176 40.8049408996274 41.7272875295469  
44.2527566343661  
LOC652877 43.0001432913058 47.5647821785529 46.1653991089885  
47.3574589211166 43.004943518025 41.554942319225 52.0942589368478  
41.4508241771315 42.6366765186182 43.7303813515864 43.844855336215  
41.2437378488025  
LOC652879 34.4021554788966 39.5050383901884 41.6977706798234  
39.2780515621926 47.6884372645373 42.8598805316863 44.3440839686558  
37.5511560880902 36.7267557061938 38.6454098044474 45.5707650534259  
40.1700117452801  
LOC652880 46.5549623118323 45.6533175604486 41.437237454134  
45.1944222548351 46.5557478175976 39.9397419279057 44.3440839686558  
44.5029690493211 46.7760357462635 44.4652605017595 44.4688999098904  
43.7672102682067  
LOC652881 45.0985088502363 44.8529259387308 41.1367478979484  
58.7338159410728 50.3713170502557 35.6125439901743 44.2166118829877  
39.6474008369935 41.9635525160083 42.4594149893798 47.6884372645373  
44.2527566343661  
LOC652882 41.8409927585705 33.4967065724734 40.5734458834617  
40.9607305725196 36.2048942610546 36.8059561571675 33.7574445386307  
41.3506832276112 42.992884918158 38.4187686307607 38.6662194645633  
36.449101775775

LOC652883 44.7915315085948 50.164201758929 42.2577689927563  
36.890925044696 49.0828761839116 43.4681646416585 41.3594868055879  
36.3405039629059 41.2870505273664 44.3648993568405 42.170702295259  
42.1537476443423

LOC652886 43.0930293831497 43.9421822132391 50.5089777244781  
47.6687908290818 47.2074332636566 45.4882438975269 52.7002314230604  
52.0503062610092 48.2123120250343 48.7414853386615 49.1067959632109  
47.0130468198828

LOC652887 42.6036491382658 46.4861258030402 47.3861758958576  
51.5913529948887 48.8381507187986 46.3715909653832 47.1345949868029  
53.838484549134 44.4395580493118 44.8997235283254 48.9754340235127  
48.5123041297835

LOC652889 37.7384958256497 52.0268699306396 64.408176016319  
42.357910063876 49.32293280121 44.2607789091176 46.1634822993009  
46.3685439301234 49.3780606970538 43.844855336215 45.390192977585  
46.3411353377615

LOC652894 38.6454098044474 40.5400384479766 36.769073068743  
39.853175885492 42.1650127805175 37.3799542961839 41.0381860307445  
40.047314525032 45.2897806651929 42.1622837416589 42.170702295259  
35.8429598823818

LOC652898 40.9558083259517 38.6414316877471 45.8844325913247  
37.29566077996 39.7568367479301 50.4022543872993 43.0930293831497  
40.7311497914871 34.5633623842083 45.5776159432079 43.844855336215  
42.57175366709

LOC652903 47.2862299990938 56.1355483199198 54.6051538001037  
53.2046867327331 65.0605897122361 52.9482338979681 58.3675164086197  
39.2672712041774 51.8083208406279 42.9866214102525 46.824299585607  
49.8253396161069

LOC652905 46.441301934328 42.9358255168086 42.4580504587581  
48.309866878365 43.4544762830742 45.1873487463472 39.8695929627783  
43.0390857698452 44.8997235283254 44.0409178714232 43.5710871617107  
42.357910063876

LOC652906 38.1169703906207 40.4359177791566 46.3411353377615  
38.9534635879195 40.148780650831 40.1428591998404 46.1634822993009  
45.0972184964705 45.0017158586743 49.3000844711116 42.7275315121163  
44.6484005362281

LOC652968 67.4846787600629 54.8439819445945 179.040571908629  
81.5135916455124 112.506613718654 73.688423848106 51.5967098638347  
57.2350830635912 120.881290860109 92.0862930476852 89.0684909049451  
67.5047089908724

LOC653034 43.3638918705225 42.8542642792862 44.3344900481112  
52.5307002738469 48.5000946421718 44.8872784170036 44.6032218589199  
49.085741080241 50.1603795873336 54.4825201506931 42.4580504587581  
49.2064066614865

LOC653037 41.5421429082231 45.4143854024453 44.6032218589199  
40.9607305725196 36.7356360093603 42.5660695551615 40.7910160811527  
39.2672712041774 44.2607789091176 35.3849221682845 46.4753015651202  
35.1451084093692

LOC653039 39.8662795144616 47.2055133646385 41.528370959196  
42.1273928203021 42.269054475455 44.3648993568405 48.9826868640753  
44.797320243931 43.3744503319109 42.1622837416589 40.723990462047  
44.9070250604284

LOC653043 46.8954576545929 44.5884811528117 43.0016969050339  
41.4273122914951 46.8674366115656 46.8954576545929 41.0381860307445

44.8997235283254 44.8003345643334 38.0078357808393 41.8168470823451  
41.863927676552  
LOC653047 48.2549905619119 43.7644428186265 46.1653991089885  
39.6292788039793 46.4343327861696 44.8872784170036 43.3832826368789  
42.9301944191913 46.5411372437515 44.6305275729869 43.6629145624937  
45.7979032939211  
LOC653050 39.0102066700839 37.5797639044694 38.9469987400898  
38.3684202018524 41.7929491793697 41.8161064926185 44.2688720583707  
39.2076937845359 39.0470836345045 40.8970401536578 37.4399564169816  
40.7256433650856  
LOC653051 32.821392987958 39.0102066700839 39.0775870687758  
36.264823544143 32.4181238410234 32.0500360504817 38.7337086062875  
31.5766875248365 32.7294532998931 41.2276963324981 37.3687900733549  
42.57175366709  
LOC653052 37.0320432433314 42.4493032770053 43.6670755115848  
43.074472921841 44.2607789091176 40.4359177791566 41.253645578517  
41.7419877611072 35.0305278582179 38.4187686307607 40.3452320167286  
37.9607839934735  
LOC653053 40.7609952437622 39.6123051184545 41.1367478979484  
42.8235313007746 41.8806343997257 40.5281496800812 41.253645578517  
42.5435283762933 43.2761454096265 38.745552403895 44.3763859390287  
49.3984571719129  
LOC653056 39.5676051939342 42.8542642792862 39.6451483836089  
42.9358255168086 42.7982502551634 40.8634043028528 42.1607322031054  
37.33030683349 42.5406888281114 41.5435611403119 39.2542963855807  
40.4639532172338  
LOC653057 45.6517320730042 45.0115870036541 61.9293105089291  
42.8235313007746 39.4693871570028 41.6590564937735 46.8613212048981  
40.5158867964016 44.0519245668737 43.2988017098387 44.553780984244  
48.5123041297835  
LOC653059 37.4554876386402 42.5269793679335 43.7630587657205  
41.4273122914951 40.8873907150245 47.57333603903505 40.6750540874299  
38.079222289614 37.9273653326866 48.6124127998952 42.2618615571566  
41.5536168238478  
LOC653060 39.5676051939342 40.3384318592985 43.1931731665131  
40.3180310664156 42.9090346219023 35.8227939208521 39.6535880152834  
39.7509165247419 37.0126425326534 36.9102644736882 40.6373400186325  
38.0452862258803  
LOC653061 39.0620487644635 38.5252456306656 36.3604951341921  
43.074472921841 30.7606118575469 38.3418933808844 39.6535880152834  
36.7460922671619 36.7267557061938 37.1275334308172 33.7948557837079  
35.5523662009011  
LOC653066 60.9710783023013 58.9128486419884 100.567309348016  
71.3932787152381 60.5290966885203 59.2643906275025 61.6544855697851  
51.6660481331154 75.891637602914 69.0530953932111 70.0059240383657  
52.6922486991742  
LOC653071 94.9785931907153 58.4134572546373 63.5968376349362  
52.8502823653368 92.0958762013613 69.9819944829311 76.6843094402633  
250.585851778133 88.7605288058249 59.4309046716701 60.0765286625112  
65.4784797364469  
LOC653073 45.1569741609597 44.5152708955623 50.2203578628217  
46.614092935749 47.7508139534968 44.0804700754786 47.9665737016961  
45.3872406432794 45.6582729799009 48.0756651489012 45.5055402477919  
41.3948836161924

LOC653080 56.566634814242 70.0946091883744 59.5444359507702  
55.8709511400674 51.7456939295414 49.1495645678651 49.6078549993388  
48.7814131120945 53.2046867327331 64.6970918899831 61.1129808051181  
58.9836017745712  
LOC653081 45.6517320730042 42.7775752471711 47.5673419710251  
45.7397504535169 51.940083408061 47.2927436772465 41.706879587091  
44.8997235283254 49.5539622682049 49.4006068471301 43.1931731665131  
46.3411353377615  
LOC653082 40.5654775358427 45.4143854024453 49.4573631027613  
42.2496337895968 49.452985143568 46.574682061365 42.7431359850339  
43.1567024035183 40.6957787921451 47.3791873993182 41.1638563416981  
48.6795178347248  
LOC653086 297.187417426993 119.157952832454 151.425712904293  
277.665554240228 120.090807153941 109.525921548011 203.53267380432  
512.255695437272 119.015431849218 333.731080636948 298.031228833741  
236.661422875826  
LOC653088 43.2724556187214 41.554942319225 45.2313723727673  
42.0102671859606 39.5595233162192 44.6524308640784 43.0930293831497  
47.3791873993182 46.7760357462635 40.7063426028871 45.2265319826548  
46.6397391251762  
LOC653089 36.9060997041453 37.6383530120621 40.6737160001291  
40.3180310664156 43.5544347011646 43.1826328292558 35.3362091871364  
38.2782436497441 38.1169703906207 36.3612409063792 37.4642807402741  
40.0557788909923  
LOC653092 39.1590964332473 43.0227387991135 44.7829632472754  
44.550322123994 44.3557408297309 42.0574848021044 42.357910063876  
46.695848687694 38.6322728994674 40.4136535208406 37.4642807402741  
40.0557788909923  
LOC653093 44.8914371498528 38.4330755397458 51.1347974668251  
50.8567345921473 44.3557408297309 44.8872784170036 50.2016912396771  
47.7889447429963 42.9020321355927 44.2580151149956 38.956280281655  
40.2669497398702  
LOC653094 37.8386378737561 38.3322849790657 46.1653991089885  
45.4634652319753 40.4639532172338 39.0266821712099 40.7910160811527  
39.0620487644635 45.8325181856483 41.6373771565199 36.7283081422707  
43.5738557773903  
LOC653097 40.2543341073001 44.5152708955623 37.8386378737561  
40.3180310664156 41.3755760434934 45.1873487463472 39.4600924554505  
38.1835938174625 43.1805016690297 39.0648733099061 46.7386599624801  
39.8497227447888  
LOC653100 48.7646976789783 47.2055133646385 42.7303139017786  
46.8954576545929 40.4639532172338 41.6590564937735 44.2166118829877  
44.0390019242862 44.2607789091176 43.0919221375514 42.170702295259  
45.9693232070002  
LOC653103 89.1632548302738 125.197314240529 125.465429498178  
110.88526946931 120.881290860109 75.0092868910417 135.644934816665  
73.362936710475 99.2341244350412 81.7171463878604 85.3930226794591  
95.491982090349  
LOC653104 43.3638918705225 44.1239711172417 38.5045333213784  
44.550322123994 40.3452320167286 42.9695585740813 43.6753843488695  
39.853866204927 42.9020321355927 42.3606390470387 41.6336636285875  
38.745552403895  
LOC653105 40.1925952773317 40.4882741869718 40.047314525032  
44.265834798964 43.6782245625941 46.0949473111149 40.3302268293707

41.7932258301997 41.1742244762318 41.4397539024976 39.7631425193874  
42.4162492820012  
LOC653107 39.4250105372135 44.3187284857534 72.1154333023225  
41.3567204694281 41.2507419031133 41.5173370741598 41.652839262361  
41.7419877611072 43.0930293831497 43.9920828925037 41.1638563416981  
40.9022255200169  
LOC653108 69.2322821603564 247.074756460224 401.347734852083  
46.1673159982664 477.143510243862 80.3805507705979 297.662970257144  
122.292794686468 279.337384456822 134.285947677624 190.921576470336  
183.887843429281  
LOC653110 51.6974465478564 109.294124176508 119.872031126474  
42.0621425894624 41.1868052124344 39.132725377815 44.5390641547628  
49.8666125578518 102.962105111048 81.0880833950735 103.14577985944  
63.994439164071  
LOC653111 42.5193208629123 47.3536182445315 45.1569741609597  
53.3967242431461 40.7779767565889 48.5835484742456 36.9355798143571  
45.1714698794331 42.6366765186182 45.9004543328976 47.1477056711335  
43.4709415392696  
LOC653113 47.1962846565261 56.8373628733077 46.8267540220952  
50.2163892855092 51.2525124735102 51.4931742685391 52.0942589368478  
46.4672637826582 48.9931786790166 44.3648993568405 42.4580504587581  
40.6614700944853  
LOC653114 34.9138625012006 33.5924201549249 36.4564050256915  
37.4223289687135 30.6242215267208 39.2985791324641 38.5066108855005  
30.6485078361448 36.197424053556 31.3901365951213 35.6041926503637  
37.3600014814388  
LOC653115 49.4151347850687 42.4493032770053 50.1860191642359  
45.4634652319753 49.32293280121 51.1621379498014 53.8687221233237  
52.8622615027833 40.6957787921451 48.9826868640753 50.5810338885769  
47.2131144508464  
LOC653118 39.4710743516517 39.9697332660833 41.2365089689635  
48.309866878365 43.7517118200398 38.8336427948187 38.8417151851134  
42.357910063876 38.4344387289956 40.7063426028871 42.170702295259  
45.2783024981315  
LOC653119 48.0201377454632 69.2082505043031 69.7855392178808  
42.0102671859606 81.2359429678503 46.7800033479223 43.9450023643394  
45.2806199505029 54.4059109100338 44.8997235283254 47.0940613507321  
43.3744503319109  
LOC653123 37.4554876386402 36.6968906669565 39.0775870687758  
39.3750969348308 36.8059561571675 41.6590564937735 37.830876898596  
46.5717043290731 39.2809305246091 41.7405682794166 35.2339574411711  
41.6550823405646  
LOC653125 48.4459451445651 49.2050538150106 52.7005092555102  
46.3203995372658 72.4545316969598 48.9826868640753 46.5650556481721  
47.3791873993182 52.9482338979681 44.7520317855773 45.4799270968969  
48.8670821164567  
LOC653127 44.1294459089314 45.2556760873335 40.301483914446  
39.1335009052403 39.9088079891223 38.7578265341627 43.1602899171656  
40.2382908228517 40.6503965580437 40.1179210534118 40.5824352835642  
44.9734311311394  
LOC653129 39.8662795144616 40.6380495994768 35.3649449469275  
37.651298468202 41.6806984441849 41.7627910693483 40.9157352260901  
45.9604707098953 37.8319142847141 43.1839109702714 39.0550139257658  
38.1421709520616

LOC653135 45.9426591985894 42.6022652963326 50.1520209533747  
44.7401523707775 43.1252272136667 44.4619248757502 46.0817481577316  
41.0844534776541 40.7847110517594 44.3303034026662 41.9083581529276  
49.8253396161069

LOC653136 43.6706764143908 47.3536182445315 44.2405728317107  
41.8778873678551 44.4489662507893 40.8634043028528 43.0930293831497  
38.745552403895 46.1101825640108 42.9866214102525 43.0016969050339  
42.9887069977696

LOC653137 51.0225132036905 44.6918600441328 46.4569566520107  
44.265834798964 47.9128504683618 42.8598805316863 52.561573697155  
50.1833483241864 47.9035532886869 45.9004543328976 45.2265319826548  
47.6938628797168

LOC653140 37.7384958256497 47.087835967892 42.5406888281114  
45.0798408927912 37.956732373465 40.650742261428 48.0283573444179  
46.4672637826582 42.0621425894624 46.0119912782855 43.7585538437696  
39.1553169409075

LOC653143 40.8681871019812 42.1607322031054 44.696023817801  
40.4359177791566 48.5000946421718 41.2567470068038 46.3057385979341  
42.4580504587581 46.3203995372658 37.0320432433314 46.824299585607  
42.0424641526302

LOC653145 39.1125272232764 44.3529919625344 77.7907484334847  
38.7834015512793 42.2321685526192 41.4219820984507 40.5018032884134  
38.1835938174625 43.2163597439147 40.5537267820608 40.3180310664156  
40.3295323726475

LOC653146 40.3478825593224 45.0905928998779 47.2962360458401  
46.614092935749 39.1650142708257 44.3648993568405 50.8388984085636  
44.9977782988116 43.9450023643394 46.5650556481721 42.7275315121163  
43.3744503319109

LOC653147 233.07404514708 118.923419920947 252.870708814507  
267.85990321012 234.675357616705 172.599587851881 180.994353525666  
252.061166074743 262.534449975056 98.5554785420459 114.719721626067  
191.253860976433

LOC653148 40.8681871019812 42.0709558258414 47.2962360458401  
35.6027791404152 35.3327761997046 43.3785777889265 37.6036146841933  
41.3506832276112 36.8127605061228 41.9666541498638 39.153226699662  
34.6720534245631

LOC653149 43.9309845324767 48.6447083765118 43.0971787292711  
47.9915414951747 46.6397391251762 45.0882356578404 45.223075311113  
47.2009420656854 42.9020321355927 46.7646877499666 43.401782064778  
41.5536168238478

LOC653154 42.0532901689036 44.5152708955623 39.991353369336  
34.4382958501338 45.2556760873335 41.6590564937735 41.0381860307445  
43.0390857698452 41.4636047919453 42.2614524730856 42.170702295259  
42.7782216342806

LOC653155 38.385865183581 40.6380495994768 36.5474283500601  
40.7481155008596 40.2449343247539 39.7394181011603 42.9803717121865  
43.1567024035183 44.619512785899 41.1222709786153 36.9060997041453  
39.6352613956998

LOC653157 36.2496364442264 45.7317208802318 43.401782064778  
47.9915414951747 41.2740822675592 41.0582900711341 41.4742337714895  
52.9813204449021 37.8319142847141 39.4710743516517 42.6366765186182  
40.5703581862752

LOC653158 211.685526927495 66.8026147385682 57.1226931773006  
261.6201598868 46.7508829977587 140.264270771578 74.5591290353333



154.111066539468 98.3798838151482 160.187478921145 136.250317107253  
124.628895737993  
LOC653160 36.1232327599945 41.6466169548846 35.6765064335425  
36.1102444571522 37.5556299264699 34.8179347896484 42.357910063876  
31.6357375926754 41.0476065156912 36.8059561571675 42.046575509735  
36.6271061451613  
LOC653163 42.2455707947223 44.5152708955623 49.6347864008749  
42.8235313007746 47.8075998240396 45.6129956328415 53.8687221233237  
48.4670130605028 41.7627910693483 48.7414853386615 47.4630625313159  
45.1735152121056  
LOC653165 40.0557788909923 44.5884811528117 43.4709415392696  
41.8778873678551 34.4570158133896 44.8872784170036 38.0598374201407  
43.3262148375525 44.619512785899 41.7405682794166 39.153226699662  
34.4570158133896  
LOC653166 44.1294459089314 42.7775752471711 43.7630587657205  
40.4359177791566 40.0599807618105 40.4359177791566 39.7576136507593  
35.7973685350741 47.0804681460898 36.5806287103157 41.3553369544097  
41.2437378488025  
LOC653169 38.1169703906207 39.2907645923217 43.8495248991589  
46.7577982595088 44.0451487108213 42.2577689927563 38.941855825269  
41.7419877611072 44.8997235283254 42.785429206422 38.4689132737495  
38.2350720635382  
LOC653171 116.253417059012 207.30460556799 141.293219914385  
215.131274710043 110.599131324937 105.945216149549 135.012695962236  
100.234661597218 144.500148287951 66.5422130374814 64.7598303406649  
103.146623798256  
LOC653175 43.7585538437696 42.1607322031054 43.6670755115848  
44.4367387274922 47.5647821785529 42.0574848021044 42.7431359850339  
42.6450179841129 39.7537274655115 44.2580151149956 40.9157352260901  
39.4490233720848  
LOC653178 41.0970259989281 40.931294690669 42.5406888281114  
43.8495248991589 45.3675390992851 40.7616966228404 43.6753843488695  
42.2577689927563 41.0476065156912 41.0057887014368 42.170702295259  
42.828737648529  
LOC653180 38.5648843914189 33.939263369489 31.8679959015659  
37.651298468202 35.3327761997046 40.040778349137 37.2892641289258  
35.7973685350741 40.3316153483289 40.6022003765153 34.6366195121669  
39.9519547348106  
LOC653182 45.9090659324223 46.4861258030402 43.8495248991589  
48.665578118898 45.3675390992851 44.7804080899431 42.4939802311136  
45.642304356051 43.3744503319109 44.571915452417 42.357910063876  
39.0536056496869  
LOC653184 40.4639532172338 42.3711524005238 42.9104454767916  
44.4912617551615 42.9090346219023 43.4681646416585 41.3094485574845  
40.0965255448873 39.0775870687758 37.4642807402741 49.1868644496737  
43.0322714179517  
LOC653186 43.1805016690297 39.7835513496873 41.0356368374708  
42.357910063876 37.6527901109005 38.3418933808844 45.1017494688414  
86.7710020879725 45.4799270968969 49.7259371799014 49.5923712603197  
39.0536056496869  
LOC653188 37.6397652536077 44.6918600441328 42.8270038153139  
39.7411455670172 37.6527901109005 41.6590564937735 39.6535880152834  
47.4740726032707 34.226171989766 44.0409178714232 42.911855821602  
42.1537476443423

LOC653189 41.1523487516364 38.4330755397458 40.1985790927248  
39.853175885492 33.3231576795423 35.6125439901743 35.2163900400329  
39.853866204927 40.2274522635576 36.6893251782922 30.1388203764747  
40.3691324547049  
LOC653192 50.0466349801009 38.3322849790657 38.3166554965434  
38.0958223740111 33.9142669203111 37.9951997351435 42.2577689927563  
33.9687743313429 36.8127605061228 40.2112371512838 43.6629145624937  
39.1553169409075  
LOC653193 44.7044140979108 37.7384958256497 35.5220586859301  
45.1944222548351 42.1650127805175 42.4580504587581 39.1539892144371  
42.5435283762933 41.2870505273664 40.8049408996274 41.2598458726002  
44.5432192783161  
LOC653194 37.6397652536077 44.1239711172417 41.1367478979484  
39.853175885492 39.6535880152834 44.8872784170036 41.3594868055879  
36.6452480995946 37.8319142847141 41.5435611403119 41.9908237694988  
40.8681871019812  
LOC653197 44.5282181324797 47.8400694856726 53.2046867327331  
45.5869891570251 40.3452320167286 37.5887129572848 41.4742337714895  
40.831207953647 44.8997235283254 40.8049408996274 44.4688999098904  
37.4554876386402  
LOC653198 42.3433931248155 40.6380495994768 43.401782064778  
38.8495095797881 42.7107928951766 42.750861693377 47.7390230243778  
38.745552403895 38.5252456306656 36.4651112441576 41.7272875295469  
42.57175366709  
LOC653199 49.1207116242913 53.4010079725504 46.5172622801553  
55.6481366056639 46.8022627504268 53.1052228246467 44.6619282658419  
49.085741080241 48.8067321016961 49.6507190068324 48.9919087841149  
51.7154514744518  
LOC653200 33.4240466670776 41.0678614026819 39.9101908547397  
38.8495095797881 45.5809132232681 44.6524308640784 48.8319884367456  
41.3506832276112 39.3750969348308 41.6373771565199 42.2618615571566  
36.8690774823319  
LOC653203 41.5635499110307 41.2160753182416 39.8656165405284  
40.0345676922624 38.6213341190836 42.712908390565 43.0156099182214  
41.1975417470633 43.6039443285137 43.128936937037 43.5258090162298  
41.1554481567603  
LOC653204 43.7585538437696 59.0709442090059 45.6989664108554  
47.2009420656854 55.3100442506299 45.9266745571724 54.9765783642973  
52.1788489555942 49.3780606970538 51.0055825931636 44.6286581923295  
49.0655215909632  
LOC653206 40.0557788909923 42.6022652963326 43.4709415392696  
44.1483976313959 41.7929491793697 43.4681646416585 44.0137388752186  
43.5544347011646 46.7414272831181 42.02667925031 46.0905079010237  
40.0557788909923  
LOC653210 46.0336705108419 46.338401428009 43.1629414479202  
44.3557408297309 40.3452320167286 44.2335949843431 50.7530841767125  
48.9277656327075 42.7150227340364 42.8482181313226 44.2142581488029  
37.7217193704498  
LOC653211 48.1952521496489 43.9421822132391 52.6275131390249  
44.550322123994 51.1368583672022 46.0364000143537 56.0515443021293  
42.5435283762933 45.4799270968969 36.5806287103157 43.4709415392696  
43.5738557773903  
LOC653214 38.957687788868 43.0227387991135 39.4710743516517  
40.5484717678957 36.6354013629791 44.3648993568405 43.6753843488695

40.831207953647 44.0519245668737 34.7308008643142 41.4508241771315  
33.4316681623175  
LOC653216 38.237657348649 43.0227387991135 43.401782064778  
41.0726336841311 41.7929491793697 40.7616966228404 41.1507980856436  
39.1652965788406 42.5864346233886 44.571915452417 39.8184668132023  
39.6352613956998  
LOC653217 37.1485601150873 37.6383530120621 43.6670755115848  
36.4564050256915 43.7517118200398 39.0266821712099 37.7136011474903  
30.1388203764747 37.7384958256497 38.745552403895 35.3362091871364  
36.6603338274678  
LOC653219 48.3814421939888 51.7495306734657 43.6670755115848  
40.8681871019812 42.7107928951766 43.6670755115848 52.561573697155  
49.7309743973184 46.581796165231 49.1928206164702 44.4688999098904  
48.5123041297835  
LOC653225 40.8681871019812 37.3634897565502 36.0306975524309  
47.3574589211166 40.5710637884029 41.159706131351 42.629412460409  
38.5457716679071 37.9273653326866 40.5090849993014 41.2598458726002  
37.0953622406687  
LOC653226 639.120117930957 1178.52115916913 1142.67599037881  
608.005012673672 1171.207937488 858.228943026906 1119.61164710566  
959.549658414082 1093.84714207969 532.981045084589 614.088027946471  
1083.50383916482  
LOC653227 44.3355304829989 38.4330755397458 45.7968648044613  
39.3750969348308 42.1650127805175 38.6414316877471 45.6042625176633  
44.2159020605784 46.8873421271259 49.0841460667818 42.911855821602  
43.0930293831497  
LOC653232 3190.0108307463 5895.03230740197 6309.53691418065  
4168.41947709165 7127.13565491501 6606.35767508139 6027.02412617194  
2122.39240932934 4665.45637589484 3618.78958408675 4036.89580181979  
5525.13078364599  
LOC653234 51.6558970571712 60.7495043977707 71.8706847571669  
51.849385316267 54.9698568207204 48.7070804960074 49.3854238365325  
46.325232414659 48.9931786790166 41.1638563416981 46.3370338074996  
48.1125722136997  
LOC653238 42.5193208629123 40.0079769153431 40.241149247208  
42.5089442785482 40.4104129104996 37.9455533422679 43.7612574090493  
42.6030956608255 39.7985090995539 39.2069469784204 39.5722805797079  
39.7411455670172  
LOC653240 43.9518547354262 42.9358255168086 45.6989664108554  
40.9607305725196 44.2607789091176 42.0016830644258 52.0942589368478  
42.7431359850339 45.1899271235974 40.1179210534118 45.6706505553383  
42.934549734195  
LOC653241 31.1150868775826 35.3307157989724 30.3888349004556  
32.9879066304034 38.5512429290626 41.159706131351 41.0381860307445  
36.43924066428 33.3643994200057 32.9981302187884 34.266241549578  
33.939263369489  
LOC653242 50.5670783769975 50.6774883370457 70.56368853915  
51.5913529948887 64.3571664944642 62.9688525319822 65.0031119608637  
65.3019328668633 63.3694113050568 52.8928296360463 56.3106156221316  
57.5372732453319  
LOC653244 38.0089018744739 37.958111840848 43.3085358214154  
40.2455972565968 41.6806984441849 38.6704566269103 41.4742337714895  
40.2770232552555 37.1485601150873 44.6918600441328 37.6159995071541  
42.3152792870779

LOC653249 42.0847226073592 38.6807508413673 42.4580504587581  
38.3166554965434 42.442231667357 38.3418933808844 40.5585676679482  
41.8737744676674 39.6609238036815 39.8873706855774 43.7924421812682  
42.171601283248

LOC653252 39.1590964332473 49.2050538150106 36.9795961564828  
41.6564075217517 44.9936360641969 41.7627910693483 41.706879587091  
41.0381860307445 40.3316153483289 41.7405682794166 41.3553369544097  
39.3575468494941

LOC653253 54.2648201582657 44.6918600441328 47.646800205189  
42.9358255168086 48.6224651100733 47.7556758818053 54.4934782594218  
52.5909491535773 46.4164127487052 50.1649089793069 46.0095710163378  
46.8129509799753

LOC653254 37.4554876386402 40.7952353240579 36.8730514568925  
45.1944222548351 37.4470183315826 36.6996187567892 40.7910160811527  
44.2159020605784 39.7537274655115 40.6022003765153 34.8383995317036  
46.7182294568603

LOC653257 42.1537476443423 45.9732108120834 46.9711270147079  
42.8848887336829 44.5668141895992 44.0399598874356 42.0605906240248  
43.1931731665131 41.0476065156912 45.4614234442527 46.0905079010237  
41.6550823405646

LOC653260 39.5676051939342 39.3999056968598 37.7384958256497  
45.4634652319753 43.4544762830742 36.4986986135769 46.3057385979341  
37.7612949798895 41.1742244762318 47.7180816682562 38.4689132737495  
41.6550823405646

LOC653261 41.3387790895716 41.159706131351 44.9758339877851  
43.4410741327254 38.4540849632254 46.574682061365 42.7431359850339  
45.642304356051 43.9450023643394 42.2614524730856 42.5426057453993  
34.5633623842083

LOC653262 45.9090659324223 41.2598458726002 40.931294690669  
42.5664883002833 42.269054475455 41.159706131351 40.7910160811527  
43.844855336215 39.9444191873552 42.785429206422 41.4508241771315  
41.4508241771315

LOC653264 42.466333667839 42.6022652963326 43.6039443285137  
47.481302504066 40.6308525754377 42.7107928951766 45.4164642922183  
44.6511073781104 44.4395580493118 46.0119912782855 43.6294818685075  
46.2625470410195

LOC653265 45.0985088502363 38.3322849790657 47.9035532886869  
38.8495095797881 47.5647821785529 44.5544727111028 43.1931731665131  
43.6434576713809 43.6670755115848 44.571915452417 44.7114813656401  
44.6484005362281

LOC653269 45.0985088502363 43.0227387991135 48.8100349749783  
49.5424425850549 46.9906120932727 38.5252456306656 42.7431359850339  
44.0390019242862 39.9444191873552 44.571915452417 43.0016969050339  
47.6938628797168

LOC653270 50.8388984085636 47.8400694856726 50.7502704822135  
53.2046867327331 46.7508829977587 53.8461734834857 56.7780520416533  
59.3164315859919 50.3245489035833 56.9463858443402 48.8744644207821  
42.357910063876

LOC653272 40.7609952437622 38.7344853699576 45.063792968927  
40.3180310664156 37.6527901109005 43.1826328292558 35.6056062164318  
38.2782436497441 43.8482802038826 38.6454098044474 36.131485826118  
42.7782216342806

LOC653275 38.6454098044474 39.3999056968598 38.9790184198145  
38.3166554965434 46.7508829977587 45.1873487463472 43.6753843488695

42.157627240486 43.4656637536244 45.2556760873335 39.4410515050885  
47.8931773060789  
LOC653276 46.7293238583888 38.3322849790657 44.7829632472754  
52.5307002738469 49.32293280121 48.4758590019384 40.7910160811527  
43.3262148375525 44.619512785899 46.6598879466655 48.2910530887214  
45.3763275588341  
LOC653280 42.0532901689036 47.9128504683618 45.6989664108554  
41.8778873678551 37.956732373465 43.3785777889265 36.8369172900902  
34.6977013306396 40.7847110517594 44.2580151149956 42.8263096141654  
47.6938628797168  
LOC653284 43.3638918705225 43.7644428186265 41.2365089689635  
39.9697332660833 43.7517118200398 44.3648993568405 44.3440839686558  
37.7612949798895 40.3316153483289 39.3698811593364 39.6403089864678  
44.3521099857368  
LOC653286 34.8099089553046 35.1224289925572 35.3649449469275  
37.5382094267692 35.6434124419782 35.5158505219112 34.3633615460307  
42.4580504587581 39.853866204927 35.7202909649682 37.6484782516569  
34.806104801006  
LOC653291 38.7537364570873 38.0226905622357 43.6670755115848  
44.265834798964 45.5809132232681 42.4580504587581 46.7100796279384  
41.9315419791594 46.8873421271259 34.1648535095605 46.4205654140754  
39.1553169409075  
LOC653293 48.3451401499671 43.3016395799961 41.1742244762318  
46.4555908533915 44.0977148249302 42.750861693377 45.4164642922183  
43.844855336215 41.2424637338424 41.9097689475185 41.4860822396574  
45.0035308952466  
LOC653297 47.4678477186801 42.4493032770053 39.0775870687758  
49.7350276169552 43.2484996523549 43.5752393599169 43.0930293831497  
45.9604707098953 115.155021677978 38.6454098044474 44.3763859390287  
40.3691324547049  
LOC653303 44.5798743103596 45.3756389170606 41.6079958749402  
41.8778873678551 49.5666074434383 44.5099734963815 45.3597029614942  
47.3791873993182 47.5810366106247 43.401782064778 41.3553369544097  
45.063792968927  
LOC653305 38.385865183581 47.1332119496722 44.0451487108213  
60.620259884953 44.4489662507893 36.2768299545794 44.3440839686558  
40.4359177791566 41.9635525160083 40.6022003765153 41.6336636285875  
42.7782216342806  
LOC653308 51.8781065691038 64.0096843640535 62.3936376596431  
47.2009420656854 53.8260140375214 41.3553369544097 59.0457625163577  
57.445796273665 54.4912806027381 53.9412154719864 51.0492389286271  
64.2769859135548  
LOC653310 32.9174234020987 32.4552405279874 41.8751578329365  
40.1804147506786 43.5544347011646 35.7034203372528 40.4359177791566  
42.2577689927563 65.7924490713262 40.8049408996274 42.2618615571566  
42.6758568421347  
LOC653313 44.2350046179299 34.6306468196142 42.3536549114165  
39.2780515621926 43.6587492470348 36.8059561571675 37.6036146841933  
32.6039814489621 36.2733735494625 40.5090849993014 35.6041926503637  
34.6720534245631  
LOC653314 2300.20602168385 2992.62035058532 2779.37660132136  
1932.2647526188 2650.09507972593 3021.24285327836 3088.44063817936  
1981.03929621057 3253.86278287661 2621.65272077828 2944.3433949897  
3055.1209535841

LOC653316 42.9104454767916 42.3550738181144 43.0016969050339  
42.5664883002833 45.1137938810047 42.357910063876 44.8643898647322  
44.797320243931 40.3316153483289 44.7958122466628 46.4205654140754  
54.293880614303

LOC653319 47.4019872255144 49.2934904960601 51.8699412145606  
45.2806199505029 40.8873907150245 44.6524308640784 42.629412460409  
43.3925093042325 47.9035532886869 42.9866214102525 42.6366765186182  
42.0424641526302

LOC653321 37.0320432433314 36.3110701990588 38.3166554965434  
39.3750969348308 37.8679241954337 41.159706131351 41.253645578517  
39.6474008369935 32.9756367838345 39.1621898366355 37.9946685306274  
34.3409660445447

LOC653324 38.6454098044474 41.8848959280916 42.157627240486  
47.8164193292842 48.0234896130991 38.2293008890613 39.7576136507593  
41.1575777497576 42.9020321355927 41.9666541498638 46.6442692119997  
42.6758568421347

LOC653325 37.4554876386402 47.5647821785529 47.4740726032707  
40.5484717678957 41.0885562160946 49.4157684139858 42.8684958525042  
48.0582855095143 38.5252456306656 44.7958122466628 41.9083581529276  
46.1592873342534

LOC653326 37.4554876386402 36.6968906669565 41.528370959196  
40.1804147506786 40.148780650831 38.7340969861754 37.7136011474903  
40.047314525032 39.6609238036815 38.745552403895 42.7275315121163  
37.3600014814388

LOC653333 42.6036491382658 43.8495248991589 38.1421709520616  
44.0451487108213 38.3561682218911 41.7627910693483 36.9355798143571  
45.1714698794331 44.2607789091176 42.8936990772838 39.4410515050885  
39.7411455670172

LOC653337 41.5689645295284 40.9731067463382 40.0998167098057  
43.1275490164761 43.4544762830742 42.8598805316863 42.5660695551615  
47.4439407315335 41.7627910693483 41.7932258301997 45.1432412071268  
40.9683275553869

LOC653338 47.2862299990938 38.9338521051669 38.6727842796202  
50.2163892855092 42.9090346219023 40.9506062495231 40.1235656101329  
54.720204938924 41.863927676552 45.4614234442527 44.0409178714232  
44.5432192783161

LOC653342 45.7356815244513 46.4385386401326 41.528370959196  
42.5664883002833 43.1252272136667 54.4753345912615 43.5627649099623  
41.5464765641928 44.3440839686558 46.2286164776607 46.0905079010237  
41.2437378488025

LOC653344 446.491994276469 569.966632625157 149.397632479523  
70.2541961995753 505.650842529816 128.657014567195 574.467486140819  
458.351940464467 485.139076884109 715.662312404643 512.691506909762  
403.335980469043

LOC653346 49.085741080241 41.6466169548846 38.8775560911841  
39.9697332660833 47.4548471240051 37.0180934800573 47.8947595316832  
43.7396619462033 41.4636047919453 42.4594149893798 39.2542963855807  
42.9887069977696

LOC653349 42.3675565493382 40.1073950092563 45.0017158586743  
38.5855564939014 43.9937687851164 44.9411655353314 40.5585676679482  
41.8417024632349 44.7058233759912 45.5776159432079 40.0394833064005  
42.4322338033273

LOC653352 45.0461014954369 48.1460386356622 48.6037684272115  
44.4912617551615 58.174555206394 41.5173370741598 44.1328851552121

52.5481233846246 41.627892303206 43.0919221375514 46.7846562208685  
43.0930293831497  
LOC653353 42.3433931248155 40.148780650831 36.3604951341921  
39.6292788039793 41.6806984441849 39.2248354955045 46.4388841354122  
46.695848687694 37.1820543575123 36.0481934423077 37.6484782516569  
40.3691324547049  
LOC653354 79.1369056968656 100.616027485975 116.709906902201  
66.5921967967793 84.2158827857221 81.0880833950735 75.7342400123505  
66.6320017520888 94.7110944331075 71.1607965028029 71.4414688202373  
83.7829283976292  
LOC653355 43.6706764143908 42.8542642792862 42.7303139017786  
46.0228732507872 39.1650142708257 42.357910063876 44.4639405506967  
42.2577689927563 43.0930293831497 42.0621425894624 44.1148826235374  
48.1627097465883  
LOC653362 37.0320432433314 40.0527893189096 39.9101908547397  
37.7469621225553 37.8679241954337 37.7000400506818 36.8369172900902  
38.956280281655 39.9444191873552 39.2623423164488 41.1638563416981  
34.2141875904985  
LOC653366 41.7397731376692 43.0227387991135 49.7350276169552  
38.2041059863839 48.2748123114598 40.5281496800812 48.8319884367456  
43.5544347011646 46.581796165231 42.5664883002833 44.0409178714232  
40.0557788909923  
LOC653377 166.511915820497 194.827750623463 164.097531361519  
149.260740603715 166.36685654692 344.44626908553 160.117375210168  
258.913621521866 276.86542239106 159.588684603267 148.178364767218  
258.120500906788  
LOC653380 37.7384958256497 45.7317208802318 45.063792968927  
39.9697332660833 44.4489662507893 36.2768299545794 38.8417151851134  
35.4526946152955 39.4762546236449 40.1179210534118 41.2598458726002  
43.1805016690297  
LOC653381 1051.58050264114 1275.78715071615 564.929183025034  
280.820745089796 1257.19844370057 332.933704863586 1426.87261062373  
1497.73669971925 509.004054793277 814.991871217268 836.472724085903  
841.316771679857  
LOC653382 49.2987323947341 47.3861758958576 47.8236476327812  
52.4343519579313 47.0533794594844 44.4619248757502 48.2439143986124  
45.5581356216957 57.4317879234275 42.9285286409526 47.0110068985119  
49.1200355938198  
LOC653383 85.4713284900688 88.9321928608078 74.9113162056974  
66.0397471691747 112.506613718654 83.7019398654324 112.805898501551  
54.6067620335514 82.0081006332668 57.5713378330876 78.0020909283414  
63.9371474698484  
LOC653387 38.957687788868 40.8880530359822 41.6977706798234  
45.2759158146116 42.1386542162789 42.357910063876 42.1157692936428  
39.8016018354453 54.3458391089652 42.9866214102525 40.4504608195666  
41.5536168238478  
LOC653392 44.2350046179299 45.7317208802318 48.0191002461099  
45.4634652319753 43.4544762830742 38.6414316877471 43.3262148375525  
43.6434576713809 40.4997186069494 42.0621425894624 39.153226699662  
47.6938628797168  
LOC653394 46.3390850717989 44.5884811528117 48.8623729374733  
44.1483976313959 39.2114264935239 74.3187437598836 43.2721716572958  
40.6171774724171 43.3744503319109 42.4393920571519 47.6388115824631  
46.1592873342534

LOC653397 41.3387790895716 35.4484652445078 37.7384958256497  
41.1886975241176 35.4484652445078 39.4953494583071 37.1643693306382  
36.6452480995946 39.853866204927 39.0648733099061 32.9879066304034  
40.9683275553869

LOC653410 41.2424637338424 40.8880530359822 41.6079958749402  
43.5627649099623 46.7508829977587 39.3841861812262 43.0930293831497  
46.8954576545929 38.7298222155532 44.1379638573455 41.2598458726002  
43.5738557773903

LOC653411 36.5393857306744 42.1607322031054 41.6977706798234  
31.7207795618545 44.6834648302383 42.157627240486 38.8417151851134  
39.7509165247419 45.8325181856483 42.6793753550854 41.5421429082231  
39.1553169409075

LOC653412 39.5676051939342 37.4540772310118 41.3366779545815  
48.4916117779992 46.0977687311222 43.1826328292558 41.3594868055879  
35.7973685350741 40.3316153483289 37.1275334308172 39.153226699662  
34.2141875904985

LOC653418 46.8141313516997 44.5884811528117 40.0998167098057  
41.0726336841311 40.9950639693255 40.650742261428 41.4742337714895  
41.1575777497576 43.6670755115848 47.9056710878325 40.547835538778  
42.2577689927563

LOC653419 39.7320564340365 42.0500582486532 40.0998167098057  
44.7401523707775 51.8562635270111 44.1350486752012 49.540449125788  
44.6560353921013 42.0621425894624 42.2614524730856 43.4709415392696  
45.3267183347084

LOC653420 50.9381343674699 43.3458769998118 38.2280071951674  
47.6687908290818 42.0709558258414 44.8872784170036 42.2577689927563  
39.7509165247419 42.0621425894624 42.2614524730856 41.0050831223107  
40.8681871019812

LOC653421 50.6473771879221 46.2286164776607 44.7829632472754  
55.2214187655851 58.1242391848692 46.574682061365 52.0942589368478  
52.0503062610092 42.7150227340364 53.0357938671646 49.1868644496737  
50.0571060701893

LOC653423 33.8558232866797 38.3322849790657 39.0775870687758  
40.7481155008596 39.7568367479301 43.0860383229288 41.8315602975157  
40.931294690669 39.0775870687758 39.2623423164488 33.6902293666089  
41.4508241771315

LOC653424 43.0001432913058 39.1982470626863 43.7630587657205  
41.6564075217517 43.844855336215 42.9695585740813 40.1235656101329  
37.4484310268909 42.4540072551568 37.7315666632629 40.1742127891824  
39.7411455670172

LOC653425 39.5676051939342 40.5400384479766 39.0775870687758  
35.1451084093692 38.745552403895 45.8325181856483 37.7136011474903  
44.8997235283254 40.4220196471124 44.8997235283254 37.9946685306274  
36.2582325396375

LOC653427 40.7609952437622 44.6918600441328 39.6451483836089  
43.8002456102021 42.269054475455 40.8634043028528 41.0381860307445  
40.931294690669 42.8036731479932 43.0919221375514 43.0016969050339  
42.8864415494484

LOC653428 37.1485601150873 42.4493032770053 38.4043916290561  
43.8002456102021 43.6587492470348 42.357910063876 45.3597029614942  
43.844855336215 43.1805016690297 47.4767851750188 44.4688999098904  
44.9070250604284

LOC653429 38.6454098044474 45.2556760873335 40.7620472083159  
45.5869891570251 43.1252272136667 38.8336427948187 38.1793598983615



41.5464765641928 36.9060997041453 46.7646877499666 38.745552403895  
38.745552403895  
LOC653431 36.2496364442264 35.0222940937513 38.3166554965434  
37.4223289687135 34.1686574241133 37.9003288112261 36.8369172900902  
34.9580369221164 32.4931776430014 33.8984830800739 36.6298807161755  
38.3291713594599  
LOC653434 44.1294459089314 40.148780650831 36.8730514568925  
34.8137085420423 44.147557390293 43.3785777889265 41.1507980856436  
40.931294690669 42.9020321355927 45.6868589181768 43.9450023643394  
42.8864415494484  
LOC653437 44.2350046179299 42.1607322031054 41.1367478979484  
43.074472921841 42.9090346219023 41.6590564937735 40.3302268293707  
40.3357777530419 40.6957787921451 41.2276963324981 38.8507804383261  
36.449101775775  
LOC653438 123.138085708441 175.018819532801 189.489924338503  
155.564141715819 204.659954879641 178.269900400454 115.357402077859  
103.199200862158 163.067962559455 94.5788538659874 116.793627324217  
89.3109637899444  
LOC653441 40.8163035350222 40.9344015136417 41.1678908661272  
42.7431359850339 42.22763273471 44.7058233759912 43.0177448037924  
39.700936357233 41.2870505273664 40.5613324908742 41.8168470823451  
39.8947803869521  
LOC653450 121.281573820819 134.19834305339 165.992057520727  
215.645475520124 107.427186954956 150.572774995368 119.015431849218  
83.0497574039035 98.1495112518979 75.2053836356882 84.7058085717914  
84.3464768820344  
LOC653451 37.55264801907 40.3384318592985 41.9666541498638  
39.2780515621926 41.1868052124344 39.4953494583071 42.2577689927563  
42.8482181313226 45.9227107476843 39.5637454855233 39.7342718293432  
37.0953622406687  
LOC653453 46.5549623118323 40.6380495994768 36.178547300352  
36.3604951341921 40.3452320167286 38.3418933808844 50.0088611244948  
46.4672637826582 41.7627910693483 37.5343260962758 42.2618615571566  
42.1537476443423  
LOC653461 34.4896350146096 33.6902293666089 33.4240466670776  
36.4564050256915 37.8679241954337 37.7000400506818 38.1793598983615  
33.9687743313429 40.0403898620771 32.2463318211725 30.493888765264  
35.1451084093692  
LOC653463 43.5710871617107 46.0713306971594 45.063792968927  
46.1673159982664 41.6806984441849 42.357910063876 50.5252048155459  
50.7364620410977 41.1742244762318 41.9666541498638 44.9713479185144  
41.7575097298927  
LOC653464 42.6575535390785 42.0709558258414 42.4890076400051  
42.7489468897708 43.683792219729 45.4607426241257 44.9094465483072  
46.695848687694 42.0621425894624 43.781101409552 45.310660704531  
42.1860813954352  
LOC653468 42.164330702937 44.2492967753383 43.8153459269057  
45.2759158146116 41.7525817198982 39.4600924554505 42.4558047733126  
41.8767957887205 44.4850116217157 40.2579040125416 41.6731203757269  
41.4508241771315  
LOC653471 47.2218282357336 43.9783383422823 49.4067286971348  
44.0991023527481 43.6587492470348 44.1737502492846 42.6913548400127  
42.9887069977696 45.0997987980157 50.0564735608363 46.0513515682555  
45.5800840647989

LOC653472 35.3227485563945 41.8848959280916 36.4564050256915  
37.5382094267692 39.7568367479301 36.4986986135769 36.5352572191451  
44.4031868028216 38.0213051227859 34.1648535095605 39.4410515050885  
44.3521099857368

LOC653479 95.5325488969517 96.038271786159 106.799510275842  
80.7664399131413 122.23209417744 97.0348634204639 106.398825125486  
122.877322487518 104.103899614521 68.3157692917711 78.4590546118913  
94.6734338650799

LOC653480 41.2424637338424 33.939263369489 33.553634633839  
40.9607305725196 40.7779767565889 40.9506062495231 42.629412460409  
39.1652965788406 47.5564423692142 45.3530683538086 48.1352470945488  
42.357910063876

LOC653481 42.5193208629123 40.2493681589104 32.3881195727383  
33.3231576795423 37.7576900881741 34.5886782974123 36.5352572191451  
41.1575777497576 39.6609238036815 33.5412189543102 36.5359455830388  
36.449101775775

LOC653483 37.55264801907 38.6414316877471 36.4111953223148  
40.7481155008596 39.9283177178222 41.9069736908705 45.4164642922183  
40.6171774724171 41.4636047919453 37.3687900733549 42.4580504587581  
38.195965820384

LOC653486 43.3638918705225 43.4396866157171 40.4070046183108  
42.9358255168086 48.2748123114598 47.6803619768589 45.4799270968969  
46.0633179231318 43.3744503319109 46.6598879466655 43.1931731665131  
42.6758568421347

LOC653487 33.8558232866797 37.6383530120621 42.9104454767916  
39.3750969348308 37.1565984182084 35.7034203372528 38.6243997507646  
37.2237132058632 43.5669306063196 44.1379638573455 37.7384958256497  
41.0657892043496

LOC653489 329.677454924062 133.487946450906 157.592292551459  
274.134201700259 123.506372870621 117.127994102455 198.623556176842  
556.092573451208 126.156748063621 340.429325650126 324.506136847875  
243.15571937138

LOC653492 38.1169703906207 40.0527893189096 41.6079958749402  
39.853175885492 47.4548471240051 36.4986986135769 41.4742337714895  
43.3262148375525 38.4344387289956 37.7315666632629 47.299647867533  
36.5474283500601

LOC653493 43.5710871617107 41.0678614026819 38.5045333213784  
51.3851157261451 40.7779767565889 43.5752393599169 44.0687697278114  
43.2551508830106 41.1742244762318 40.3235655331796 44.8872784170036  
43.1805016690297

LOC653495 40.148780650831 39.3999056968598 39.2707964550441  
42.0102671859606 39.4693871570028 40.244271403831 42.0605906240248  
38.745552403895 38.6322728994674 49.0841460667818 40.3452320167286  
39.4490233720848

LOC653496 104.232196493024 61.9753438182501 66.737740728688  
58.5406981871153 65.8319449883221 87.8967913380047 48.4859552186772  
51.555506218204 57.1016072897358 75.3333024462557 74.7669841575348  
66.8026147385682

LOC653497 47.2862299990938 47.4076235350059 46.8267540220952  
45.5869891570251 42.1650127805175 43.4681646416585 41.706879587091  
38.079222289614 41.4636047919453 43.0919221375514 44.2925355984056  
43.8575940017119

LOC653498 45.3872406432794 37.8217989841918 43.6670755115848  
41.4273122914951 42.269054475455 38.9378717994178 42.9803717121865

38.3684202018524 39.7537274655115 35.93950183586 41.7272875295469  
47.3172462673426  
LOC653499 43.4626049853157 44.7829632472754 53.3127618245672  
67.474556589181 44.8897737954573 38.7340969861754 47.2927436772465  
86.915098846441 56.1172088979505 46.5650556481721 51.0492389286271  
42.7782216342806  
LOC653505 795.381998233245 767.489657259345 729.342532316666  
497.591040004541 1016.13142851085 615.442484911026 818.927157206447  
532.35007819883 1132.19026676901 347.552309199761 309.39599482851  
655.03569504267  
LOC653506 1118.62223628039 567.978225839768 299.334388262225  
1177.44875377686 590.139974503603 1145.59111340228 448.196293409768  
2113.73880184695 728.257836227637 772.368030410394 764.571579067138  
609.0653198086  
LOC653507 43.7585538437696 36.6968906669565 41.6977706798234  
36.890925044696 36.2048942610546 38.2293008890613 35.2163900400329  
36.7460922671619 41.9635525160083 43.9450023643394 36.3390947880186  
39.9519547348106  
LOC653512 32.6285977114039 36.0366673493555 34.9849896310235  
36.1562979552173 33.143488395779 34.8956628705329 38.0598374201407  
33.5578650644246 42.2577689927563 35.2880714952489 41.9083581529276  
40.7704587752083  
LOC653513 42.0532901689036 41.8073910693411 35.5220586859301  
42.4580504587581 36.5393857306744 39.4953494583071 37.4772922422734  
41.4508241771315 36.6312676076142 35.8304004211528 43.1931731665131  
36.5474283500601  
LOC653514 40.2543341073001 37.7384958256497 40.4070046183108  
42.4580504587581 40.8873907150245 43.1826328292558 45.1017494688414  
40.6171774724171 43.8482802038826 38.4187686307607 45.9104478407175  
42.1537476443423  
LOC653515 42.8036731479932 44.2105195734073 43.6670755115848  
42.6913548400127 35.3327761997046 37.7000400506818 40.6750540874299  
35.7973685350741 36.197424053556 37.7315666632629 42.2618615571566  
40.8681871019812  
LOC653520 46.5549623118323 43.0971787292711 41.2365089689635  
47.0874209746031 43.3332476888305 39.2985791324641 49.6872467499977  
45.642304356051 48.6494451061637 47.0055981216687 44.7926323492519  
43.3744503319109  
LOC653521 40.5654775358427 41.8073910693411 40.4070046183108  
50.5310598656998 39.1650142708257 36.4986986135769 42.1607322031054  
41.0381860307445 39.5806465938526 44.2580151149956 45.0589947942306  
46.5650556481721  
LOC653524 48.5835484742456 45.4882438975269 47.9035532886869  
41.6564075217517 45.9104478407175 44.8872784170036 44.2166118829877  
46.8954576545929 48.0163377492228 48.3693338695392 43.3085358214154  
49.6629259325705  
LOC653526 39.3709357615493 38.5252456306656 39.8299340037009  
41.4273122914951 38.4540849632254 37.0180934800573 37.1643693306382  
37.4484310268909 41.9635525160083 38.745552403895 36.8282383070068  
41.863927676552  
LOC653527 39.0620487644635 34.7135536792489 34.2890785915814  
38.2041059863839 36.9702228618069 41.9543948167375 42.4939802311136  
36.9355798143571 47.0804681460898 29.745266251498 36.7283081422707  
40.1700117452801

LOC653528 34.9138625012006 39.6995529770239 34.5718473203083  
33.5578650644246 34.6227169056411 37.9951997351435 35.6056062164318  
38.6454098044474 36.5393857306744 36.8059561571675 38.745552403895  
35.0222940937513  
LOC653533 46.8954576545929 41.7337506166619 40.4882741869718  
40.1804147506786 46.7508829977587 46.3715909653832 46.1634822993009  
39.4710743516517 42.992884918158 37.7315666632629 44.2142581488029  
38.4330755397458  
LOC653536 42.3433931248155 35.6434124419782 40.4070046183108  
39.1706564265495 43.4544762830742 36.8059561571675 42.7431359850339  
37.4484310268909 45.3756389170606 38.8507804383261 37.6484782516569  
41.6550823405646  
LOC653537 41.2424637338424 39.4629815741023 42.157627240486  
44.6905691366696 39.4693871570028 42.4580504587581 42.357910063876  
41.9315419791594 42.6762317063737 46.2768056702424 41.6657053704762  
39.5748670524951  
LOC653539 40.5265498315468 39.058673927344 39.7835513496873  
42.8235313007746 42.7577133601564 40.4656472974943 40.9731067463382  
39.3709357615493 38.3856744259834 37.3755339455893 40.1416941021143  
40.5320714850602  
LOC653541 45.3872406432794 41.4508241771315 46.0727230219512  
42.8235313007746 43.3332476888305 41.554942319225 41.8315602975157  
36.0306975524309 44.3440839686558 42.0621425894624 41.9083581529276  
40.1700117452801  
LOC653543 43.3638918705225 41.0678614026819 46.8873421271259  
45.3882138838137 40.7779767565889 38.5252456306656 40.7376840028647  
41.7877325563821 48.7358147030082 43.0919221375514 44.2925355984056  
42.2577689927563  
LOC653547 37.9387791625384 42.5269793679335 46.5650556481721  
47.2009420656854 42.3685136297603 51.6053353177789 43.1931731665131  
44.4031868028216 40.4997186069494 44.571915452417 41.1638563416981  
39.5418280570561  
LOC653554 31.197411437683 35.5310164682026 36.769073068743  
35.6928955245309 37.3508690072156 36.2768299545794 34.1889222434768  
37.6557714476853 35.1155486926999 35.0082729554459 33.8558232866797  
38.0452862258803  
LOC653555 43.4626049853157 44.0409178714232 37.4642807402741  
46.8954576545929 43.6587492470348 37.9003288112261 46.4388841354122  
49.085741080241 45.1899271235974 40.3235655331796 45.8180710486329  
42.1537476443423  
LOC653559 39.5676051939342 43.5182502375207 46.1653991089885  
47.3574589211166 51.3511088648386 42.6575535390785 45.3597029614942  
43.7396619462033 40.8970401536578 43.401782064778 44.553780984244  
42.1537476443423  
LOC653562 39.266565827316 40.4359177791566 45.3675390992851  
40.3180310664156 46.5557478175976 36.7356360093603 42.357910063876  
40.9861485852278 42.2248608921879 41.4397539024976 41.4508241771315  
40.6273137602368  
LOC653563 38.8561375693335 42.3550738181144 40.4882741869718  
36.4564050256915 40.4639532172338 39.132725377815 38.0598374201407  
43.0390857698452 36.7267557061938 33.5412189543102 42.6366765186182  
38.5279745308203  
LOC653564 38.1169703906207 35.8227939208521 39.0775870687758  
39.2780515621926 43.5544347011646 42.157627240486 42.0605906240248

39.6474008369935 38.7298222155532 41.1222709786153 37.8372168909583  
40.5703581862752  
LOC653566 298.924873508403 378.358853591082 338.164006403  
505.650842529816 341.078728185917 290.710970844525 388.74199767336  
223.850148640071 423.804472820231 145.391705645319 187.601223003233  
392.008276951929  
LOC653567 40.2543341073001 42.8542642792862 51.5292723244077  
53.593974682612 39.6535880152834 47.9503724044453 46.7100796279384  
56.9299697426319 48.8842909466002 45.9004543328976 53.0798381965427  
63.6254894053045  
LOC653569 43.3638918705225 38.4330755397458 35.9305494063137  
38.3166554965434 44.2607789091176 41.6590564937735 36.3194282084339  
40.931294690669 40.137818555383 41.7405682794166 44.553780984244  
38.745552403895  
LOC653570 39.9697332660833 39.2907645923217 41.6977706798234  
41.4273122914951 39.3667161654772 37.4782441311626 38.8417151851134  
41.8417024632349 42.2577689927563 42.3606390470387 40.6373400186325  
42.1537476443423  
LOC653574 44.9896851005259 44.7829632472754 40.301483914446  
40.1804147506786 45.9104478407175 48.4758590019384 51.4349390827895  
46.5717043290731 42.9020321355927 51.4454142248566 40.1742127891824  
42.1537476443423  
LOC653576 40.7609952437622 40.7952353240579 43.6670755115848  
42.4580504587581 42.269054475455 41.554942319225 40.4359177791566  
41.5464765641928 35.4332080966594 38.957687788868 38.1835938174625  
39.4490233720848  
LOC653577 41.6354649482853 44.7829632472754 44.4311655729487  
48.4916117779992 43.5544347011646 37.0180934800573 46.0228732507872  
38.079222289614 48.2123120250343 38.2069499294002 42.911855821602  
38.745552403895  
LOC653579 43.1805016690297 41.4508241771315 39.1799070031819  
41.8778873678551 44.4489662507893 45.6129956328415 46.8613212048981  
38.6454098044474 42.1594905198929 47.8207974930031 42.0750889188255  
49.2064066614865  
LOC653580 47.5647821785529 45.6533175604486 48.2883694323339  
51.0175677516029 51.6869155634183 46.574682061365 56.6537562775715  
46.4672637826582 48.6494451061637 46.1390887492649 42.0750889188255  
46.6397391251762  
LOC653581 41.3387790895716 38.1312950900467 39.2707964550441  
38.3166554965434 39.1650142708257 34.5886782974123 42.0605906240248  
44.4031868028216 49.7336769474446 43.7303813515864 44.8872784170036  
39.8497227447888  
LOC653582 45.6517320730042 43.2649781354792 50.1860191642359  
42.9358255168086 39.7568367479301 42.8598805316863 39.3585350448719  
43.4544762830742 47.1744296124496 44.6918600441328 44.0409178714232  
40.6614700944853  
LOC653583 79.7564155881026 207.726011653345 161.439879456216  
99.8063480813138 173.536155357688 79.0940380276977 144.046404221564  
98.9657264176664 229.792906003602 137.378222527303 179.405972075294  
90.689813277023  
LOC653584 37.7384958256497 37.4540772310118 39.3709357615493  
37.5382094267692 38.9496515344837 32.6368705146258 40.4359177791566  
35.5798430594271 36.0741672064298 37.8217989841918 47.299647867533  
37.6557714476853

LOC653587 42.0532901689036 44.8529259387308 39.0775870687758  
48.4916117779992 42.269054475455 36.3845892764084 40.1235656101329  
35.1738399826814 39.7537274655115 41.4397539024976 38.079222289614  
40.7704587752083

LOC653589 43.0930293831497 41.6466169548846 40.8420925848403  
37.7469621225553 36.9060997041453 34.4896350146096 37.7136011474903  
42.2577689927563 45.0017158586743 40.6022003765153 39.5399188536544  
36.9976231206067

LOC653591 36.1232327599945 37.8217989841918 47.2962360458401  
39.9697332660833 43.7517118200398 40.7616966228404 48.4859552186772  
41.0381860307445 39.3750969348308 43.4885245598939 42.5426057453993  
35.9604262434141

LOC653596 46.2231598401576 49.4493009852254 50.4397478643191  
54.0382756991549 45.063792968927 52.0583273941813 46.9058511192313  
57.0836219190892 44.5779589147424 58.9373124129662 59.6008106247114  
52.6922486991742

LOC653598 43.1805016690297 45.4143854024453 44.696023817801  
49.9014504704021 43.3332476888305 48.7781962164988 45.7452456977857  
46.0633179231318 47.9035532886869 42.4594149893798 43.4709415392696  
45.8546719310325

LOC653600 37.0320432433314 44.5152708955623 42.640829914102  
43.4410741327254 43.004943518025 45.2852528185486 56.9320717885002  
41.7419877611072 43.6670755115848 51.5855515705917 41.0050831223107  
44.8372404608604

LOC653601 52.6960621424156 47.1332119496722 48.8941062980393  
53.593974682612 48.2748123114598 44.1737502492846 48.9826868640753  
44.9977782988116 48.5792058061372 65.9189023794337 61.6084234634424  
55.7067742610401

LOC653602 44.3355304829989 47.4740726032707 46.1653991089885  
38.4208429103799 44.4489662507893 44.5544727111028 43.9450023643394  
45.3872406432794 41.3803269429468 39.7835513496873 42.2618615571566  
33.6902293666089

LOC653604 52.3660712483179 44.8955824420372 54.6820069269589  
44.9370339275041 63.1443731864055 42.4580504587581 65.2361525412756  
47.7889447429963 49.4221417968303 47.3791873993182 45.7328341667151  
45.0985088502363

LOC653605 43.0001432913058 43.1805016690297 43.401782064778  
40.0698728584484 40.0599807618105 43.7630587657205 41.3594868055879  
43.844855336215 39.4762546236449 44.6918600441328 41.1638563416981  
40.6614700944853

LOC653606 40.7609952437622 42.8542642792862 46.2625470410195  
39.1706564265495 39.5595233162192 40.244271403831 42.7431359850339  
39.1652965788406 39.4762546236449 34.064698871541 44.6286581923295  
46.2625470410195

LOC653609 44.0328992213727 38.2263227947189 36.178547300352  
36.7892997857376 34.5301949364147 40.7616966228404 42.0605906240248  
39.0620487644635 40.7847110517594 35.8304004211528 39.5399188536544  
40.4639532172338

LOC653610 143.932614622477 119.700522283289 108.366007746533  
153.364107550338 161.180847265279 61.8187341713197 367.685570437603  
97.3443444704601 136.644759501653 59.4969799685856 76.111908977613  
41.863927676552

LOC653616 39.5676051939342 42.9358255168086 40.931294690669  
43.6726153508978 54.6820069269589 41.4508241771315 42.357910063876

49.085741080241 39.1790517315259 47.2299678280724 39.5399188536544  
40.3691324547049  
LOC653618 45.3872406432794 43.5873188565519 40.931294690669  
41.8778873678551 40.7779767565889 41.9543948167375 41.4742337714895  
43.4544762830742 43.7630587657205 43.1839109702714 43.0016969050339  
42.7782216342806  
LOC653620 38.8561375693335 35.8227939208521 37.6557714476853  
34.9221408381038 39.4693871570028 41.2567470068038 46.0228732507872  
36.5393857306744 36.0741672064298 38.2069499294002 42.7275315121163  
36.449101775775  
LOC653623 41.8409927585705 45.0905928998779 38.5045333213784  
44.7980740332174 43.6587492470348 46.0364000143537 44.4639405506967  
41.6466169548846 33.5578650644246 40.3235655331796 35.2339574411711  
46.5650556481721  
LOC653625 45.5758521267508 49.4982025424177 51.7138050344355  
47.481302504066 44.5668141895992 49.9699131196797 46.8613212048981  
44.797320243931 46.581796165231 49.6203214143464 51.0492389286271  
49.9692385479389  
LOC653629 57.6285775590145 59.5534127075228 76.9373289454707  
50.378948785456 60.4122350478242 48.3686935595826 48.0283573444179  
54.720204938924 54.998510746958 53.0357938671646 52.2229654768933  
49.5539622682049  
LOC653630 36.2496364442264 43.7644428186265 41.3366779545815  
40.9607305725196 35.7973685350741 37.1317006162938 38.4005795891396  
36.9355798143571 42.4540072551568 42.0621425894624 36.7283081422707  
45.2783024981315  
LOC653631 46.263826584899 47.4740726032707 49.6347864008749  
52.3004056941891 49.1928206164702 61.4944752562671 51.0013344286851  
43.6434576713809 41.9635525160083 52.6879797806876 43.7585538437696  
61.5300817099814  
LOC653632 40.9558083259517 34.2618170189676 39.5450079747895  
39.853175885492 42.6022652963326 39.2248354955045 39.5496902678788  
37.0390589468421 38.8271346375425 35.6208308220005 35.3362091871364  
40.0557788909923  
LOC653635 59.5000730792772 50.2163892855092 59.9690744676539  
64.2130157241811 64.6374507338031 56.0477607422828 58.0969258817391  
54.720204938924 55.6617952786921 58.9836017745712 54.1963147679251  
54.720204938924  
LOC653636 44.0328992213727 44.2630383225933 41.1367478979484  
52.5307002738469 40.4639532172338 40.5281496800812 42.8684958525042  
44.9977782988116 44.0519245668737 42.5664883002833 42.5426057453993  
39.8497227447888  
LOC653641 38.957687788868 39.4629815741023 42.0233072093141  
43.9744941494111 42.551356054931 41.7627910693483 41.0871827071116  
40.9861485852278 43.6670755115848 47.3010040326346 45.8669209716694  
43.6434576713809  
LOC653643 44.2350046179299 39.3999056968598 44.696023817801  
36.9912468186322 36.8059561571675 43.7630587657205 38.7337086062875  
39.9576138799997 41.4636047919453 37.8217989841918 40.547835538778  
36.5474283500601  
LOC653645 40.9558083259517 42.1607322031054 42.3536549114165  
46.614092935749 41.2740822675592 41.6590564937735 41.0381860307445  
43.0390857698452 41.2870505273664 45.1569741609597 43.6629145624937  
41.1554481567603

LOC653648 39.4710743516517 43.683792219729 38.6727842796202  
37.5382094267692 45.9104478407175 41.159706131351 35.9894133432376  
40.1474543172332 38.2215591930186 35.3849221682845 34.8383995317036  
38.2350720635382

LOC653650 42.2651653674882 46.5441096202919 44.8297355822444  
48.7828451916315 42.1496174104762 50.1627868693597 50.5252048155459  
44.5029690493211 43.1805016690297 47.2955378485056 44.5264064957804  
43.9541718254769

LOC653651 37.4554876386402 39.6995529770239 39.6451483836089  
33.6816578730693 36.2048942610546 32.6368705146258 40.0052661202207  
40.4359177791566 41.5635499110307 47.611018474151 40.0766543123257  
36.9976231206067

LOC653652 44.7044140979108 36.0366673493555 36.5474283500601  
36.1562979552173 40.4639532172338 41.159706131351 45.7452456977857  
40.7311497914871 39.7537274655115 39.3698811593364 41.6336636285875  
37.6557714476853

LOC653653 42.9104454767916 38.7344853699576 40.4070046183108  
39.3750969348308 36.7356360093603 39.4953494583071 43.0930293831497  
42.9301944191913 40.6957787921451 41.1222709786153 39.5399188536544  
41.9430737035925

LOC653657 41.2424637338424 32.0823591288671 42.3536549114165  
41.6564075217517 35.7973685350741 47.2927436772465 38.6243997507646  
42.6450179841129 39.3750969348308 36.8059561571675 41.7272875295469  
45.0985088502363

LOC653658 642.211963248041 693.727004855319 756.801598119483  
828.403901345618 627.914461428624 1114.7177106695 471.734457300752  
936.978983469829 731.670315613547 1245.45371155527 1183.62228577053  
1564.55598228713

LOC653663 42.3606390470387 46.2691225551294 46.4218877301188  
45.8844325913247 42.6520415016543 44.4284622926444 42.7982502551634  
44.1311654985682 49.2267897689452 47.7779356299965 48.1578509702472  
43.4709415392696

LOC653664 40.148780650831 41.6466169548846 38.6005272730664  
46.4555908533915 37.1565984182084 43.3785777889265 40.1235656101329  
43.5544347011646 35.0305278582179 37.4302011516587 38.8507804383261  
41.6550823405646

LOC653665 41.3387790895716 40.4359177791566 37.8386378737561  
43.1847628331565 37.6527901109005 37.7000400506818 40.2154497375715  
41.0381860307445 39.4762546236449 41.9666541498638 38.956280281655  
34.1509644696334

LOC653667 40.4639532172338 44.1239711172417 39.6451483836089  
47.3574589211166 46.9906120932727 47.9503724044453 41.0381860307445  
40.7311497914871 44.7058233759912 40.7063426028871 44.2925355984056  
44.9070250604284

LOC653669 34.0467249875782 37.2810767789306 34.0382693188794  
36.7892997857376 36.08956004634 35.4142595025086 33.2425023465738  
43.9366081640576 40.3316153483289 37.7315666632629 33.9478220100351  
36.2582325396375

LOC653673 44.7044140979108 41.6466169548846 44.0451487108213  
34.1051821768421 46.6397391251762 40.040778349137 41.0381860307445  
40.7311497914871 40.7847110517594 39.2623423164488 41.2598458726002  
42.4607795638552

LOC653674 41.2424637338424 38.6414316877471 40.301483914446  
41.8778873678551 42.4864576619427 38.9378717994178 47.5963750520409



42.2577689927563 38.9006788676407 37.6383530120621 40.3452320167286  
41.6550823405646  
LOC653676 50.1533437545239 38.0226905622357 39.7411455670172  
40.8681871019812 45.9104478407175 39.3841861812262 44.8643898647322  
48.87875862356 45.0017158586743 41.1222709786153 42.4580504587581  
48.4535991392809  
LOC653680 39.9697332660833 39.0894172982439 42.5406888281114  
42.9358255168086 34.7018263647985 44.1737502492846 32.6039814489621  
38.079222289614 39.853866204927 37.6383530120621 38.3684202018524  
38.6454098044474  
LOC653683 37.6397652536077 40.8880530359822 42.157627240486  
45.8844325913247 43.1252272136667 44.9896851005259 47.2927436772465  
46.5717043290731 37.10170285405 42.1622837416589 39.9899430628542  
45.3763275588341  
LOC653684 42.9104454767916 41.3610369241157 40.301483914446  
42.4580504587581 35.3327761997046 39.6251842352088 35.4623691645629  
37.5511560880902 41.2870505273664 38.8507804383261 36.2435874904689  
38.6454098044474  
LOC653686 39.5676051939342 40.716553247236 35.8265993915844  
40.1804147506786 36.2048942610546 34.8956628705329 41.0381860307445  
41.8417024632349 36.8127605061228 39.6719190054379 39.4410515050885  
40.2669497398702  
LOC653689 45.5758521267508 44.0409178714232 43.9450023643394  
54.2886483704949 41.8806343997257 45.4882438975269 44.2166118829877  
43.7396619462033 46.1101825640108 47.3791873993182 43.0016969050339  
48.9733758107788  
LOC653692 44.5282181324797 42.0709558258414 41.6079958749402  
42.5664883002833 39.0564222526273 47.4699236780425 41.8315602975157  
51.2623287419357 46.4861258030402 44.7958122466628 42.8263096141654  
44.5432192783161  
LOC653696 40.4639532172338 40.0527893189096 41.528370959196  
41.7614975630362 40.7779767565889 38.4330755397458 37.2892641289258  
44.797320243931 40.4220196471124 39.1621898366355 45.1432412071268  
38.3291713594599  
LOC653701 48.1952521496489 42.5269793679335 39.0775870687758  
35.8472302065546 33.143488395779 35.8227939208521 36.3194282084339  
34.8949555140527 34.3842972343227 42.1622837416589 40.723990462047  
40.0557788909923  
LOC653702 53.1309801459151 54.7855575216687 50.5089777244781  
61.3747706295648 61.5236837309467 82.5956705829173 54.8074655158941  
53.5271601314404 58.7382738968248 74.3981029634178 60.8201366212589  
75.7991766454243  
LOC653706 39.7576136507593 33.939263369489 35.2838283525874  
36.7892997857376 39.0564222526273 38.3418933808844 40.7910160811527  
34.4896350146096 31.5151915411476 36.8059561571675 41.7272875295469  
39.6352613956998  
LOC653711 46.0023068797812 47.5647821785529 46.9040704638073  
51.0175677516029 45.2556760873335 39.0266821712099 45.3597029614942  
47.4740726032707 45.9227107476843 41.0057887014368 44.9713479185144  
52.4992300612807  
LOC653715 44.9896851005259 47.3536182445315 48.4890615340603  
41.1886975241176 50.2163892855092 43.7630587657205 46.1634822993009  
46.5717043290731 48.4869909888679 44.3648993568405 46.7386599624801  
45.9693232070002

LOC653717 46.6348258763289 53.2046867327331 52.3432130135266  
42.8235313007746 47.9128504683618 44.5544727111028 51.1541843174981  
50.857522488428 52.4539007817929 49.0841460667818 53.0177144132449  
47.9566297250148  
LOC653720 59.3923286524971 51.7495306734657 46.9040704638073  
51.0175677516029 52.6922486991742 45.7300501624017 52.561573697155  
50.1833483241864 45.6582729799009 51.9547984751408 51.9302027391447  
49.1200355938198  
LOC653722 43.844855336215 40.7952353240579 39.9101908547397  
44.0451487108213 43.6587492470348 40.8634043028528 40.6750540874299  
47.8947595316832 37.3600014814388 39.7835513496873 43.401782064778  
41.5536168238478  
LOC653729 40.0557788909923 39.8695929627783 34.2890785915814  
35.6027791404152 47.6884372645373 39.3841861812262 40.9157352260901  
39.1652965788406 36.197424053556 38.957687788868 41.5421429082231  
37.0953622406687  
LOC653733 44.6231541342 38.5252456306656 43.0016969050339  
43.3078542962968 44.2607789091176 44.4619248757502 46.1634822993009  
43.3262148375525 45.6582729799009 39.8873706855774 43.401782064778  
40.2669497398702  
LOC653734 40.0557788909923 38.6414316877471 45.989212296035  
42.9358255168086 45.6895223823001 41.3553369544097 48.3411413510851  
41.0381860307445 46.9739160257217 45.9004543328976 38.2795150354677  
37.5556299264699  
LOC653735 37.7384958256497 39.5050383901884 39.6451483836089  
39.5050383901884 40.6723334103791 40.244271403831 42.4939802311136  
41.1575777497576 45.4799270968969 38.745552403895 37.7384958256497  
37.5556299264699  
LOC653736 41.6354649482853 41.0678614026819 42.9104454767916  
38.745552403895 43.6587492470348 42.357910063876 38.941855825269  
44.6107027295193 41.863927676552 37.6383530120621 42.0750889188255  
38.1421709520616  
LOC653741 44.7044140979108 43.683792219729 42.2577689927563  
43.4410741327254 49.32293280121 40.1428591998404 43.0930293831497  
44.293922970134 41.9635525160083 41.1222709786153 40.723990462047  
44.4475838947656  
LOC653746 38.1169703906207 35.6434124419782 36.5474283500601  
36.4564050256915 34.5301949364147 41.554942319225 39.6535880152834  
42.157627240486 41.6616444147804 35.93950183586 34.4716904283753  
38.2350720635382  
LOC653748 37.9387791625384 40.3946758935842 43.0602678767669  
38.2599935139101 40.5303289242683 39.8455060654531 43.3262148375525  
37.9837233601316 44.2607789091176 37.920964499903 40.0766543123257  
40.7704587752083  
LOC653750 47.3791873993182 44.9370339275041 47.2962360458401  
45.5869891570251 45.4751076037511 41.554942319225 48.9826868640753  
43.9366081640576 52.3579564953125 48.7414853386615 43.4709415392696  
41.9430737035925  
LOC653751 43.9309845324767 41.4508241771315 32.1218888714537  
40.5484717678957 43.4544762830742 42.357910063876 37.3799542961839  
33.0038344711883 38.2215591930186 41.5435611403119 43.7585538437696  
40.6614700944853  
LOC653752 54.6235981131919 49.9085372049438 58.2986825661503  
39.5050383901884 81.7765447802116 48.4758590019384 49.1067959632109

54.8412943008635 54.4912806027381 54.1683282066029 53.4088637045445  
51.7833333848627  
LOC653759 38.2083710281545 42.4493032770053 40.8420925848403  
49.1786207920603 42.7107928951766 40.040778349137 42.1607322031054  
43.7396619462033 33.2715481910159 40.6022003765153 40.2649309204478  
36.449101775775  
LOC653764 66.2154717217675 47.4740726032707 49.4573631027613  
62.3936376596431 57.5040500497076 100.650129064849 42.0605906240248  
50.7364620410977 45.4799270968969 53.9412154719864 54.4140381300469  
55.0767527801658  
LOC653765 47.9175508887533 39.6995529770239 51.1347974668251  
53.593974682612 44.5668141895992 46.4648868771662 45.7452456977857  
46.0633179231318 49.5539622682049 46.5650556481721 50.2203578628217  
44.8372404608604  
LOC653766 46.0920218698606 48.2220547806679 42.7303139017786  
49.1786207920603 38.3561682218911 42.750861693377 40.0052661202207  
43.844855336215 42.1594905198929 42.6793753550854 41.1638563416981  
42.4607795638552  
LOC653773 498.284928805673 395.457351443921 404.356143472409  
509.004054793277 470.231929311877 774.8306350567 360.248832535446  
723.210613328966 402.316689485215 734.424771383522 761.341795853104  
1043.26325848938  
LOC653778 188.713487905549 53.2046867327331 85.1661952927159  
231.333080775773 73.9456720099807 96.5287245311078 73.8313212063649  
87.5666652975503 58.9870089759222 105.828093778276 121.729442469889  
103.876328830067  
LOC653781 43.844855336215 43.8495248991589 39.3709357615493  
44.550322123994 44.9936360641969 42.5660695551615 48.3411413510851  
51.2623287419357 45.5779686360641 47.3791873993182 43.5710871617107  
43.6753843488695  
LOC653787 38.8561375693335 39.1982470626863 44.9758339877851  
44.9370339275041 44.9936360641969 42.750861693377 40.4359177791566  
41.7419877611072 35.860430241131 40.8970401536578 43.401782064778  
45.0985088502363  
LOC653789 41.2424637338424 40.716553247236 36.769073068743  
39.7411455670172 42.1650127805175 40.5281496800812 40.3302268293707  
39.0620487644635 37.7384958256497 39.0648733099061 39.4410515050885  
37.8490162439785  
LOC653796 45.0985088502363 39.8695929627783 41.3366779545815  
41.8778873678551 35.6434124419782 41.6590564937735 48.0283573444179  
39.5466975353131 47.0804681460898 44.571915452417 39.4410515050885  
41.7575097298927  
LOC653799 47.0940613507321 40.2493681589104 41.6079958749402  
35.1451084093692 43.3332476888305 41.4508241771315 38.1793598983615  
48.3590401011623 47.3791873993182 42.8936990772838 43.4709415392696  
49.3087627580849  
LOC653800 45.8108990837624 48.6447083765118 45.6989664108554  
53.9517841438975 43.1252272136667 42.2577689927563 48.9826868640753  
58.3046521633424 47.798305839406 48.8623729374733 46.3370338074996  
50.5511827666954  
LOC653801 37.9387791625384 34.5023764006976 30.9159908723475  
33.9645433044281 30.9241129241985 41.7627910693483 35.8227939208521  
34.8949555140527 37.8319142847141 34.4875013487777 33.0553208959996  
35.5523662009011

LOC653803 47.3791873993182 53.4735821194294 48.2883694323339  
54.8412943008635 55.9283039581662 53.6858208094027 47.5963750520409  
48.9826868640753 42.8036731479932 49.1928206164702 43.1931731665131  
49.904979214379

LOC653806 41.9407041937973 42.9358255168086 46.0727230219512  
43.9282059368202 44.147557390293 44.6524308640784 44.7255207589606  
42.5435283762933 45.6582729799009 50.0564735608363 39.7342718293432  
46.8129509799753

LOC653807 44.0328992213727 40.5400384479766 50.0748292497578  
49.9014504704021 39.859345745831 43.9724628401189 39.7576136507593  
34.6977013306396 36.7267557061938 42.3606390470387 42.4580504587581  
38.2350720635382

LOC653808 39.4710743516517 41.8848959280916 43.1931731665131  
47.0874209746031 46.8674366115656 45.2852528185486 41.706879587091  
47.3791873993182 45.6582729799009 38.2069499294002 42.911855821602  
42.2577689927563

LOC653809 38.8561375693335 42.1607322031054 32.5052327840481  
38.4208429103799 35.6434124419782 34.2773859804062 34.3633615460307  
34.1806289878747 36.2733735494625 36.4651112441576 33.1645364749371  
35.0222940937513

LOC653816 43.4626049853157 41.554942319225 43.3085358214154  
44.7980740332174 42.1650127805175 43.5752393599169 42.4939802311136  
45.1714698794331 43.8482802038826 44.8997235283254 44.8872784170036  
42.57175366709

LOC653817 40.4639532172338 37.8217989841918 44.5134109184888  
40.3180310664156 37.6527901109005 39.9397419279057 35.4623691645629  
37.7612949798895 37.3600014814388 46.1390887492649 37.6484782516569  
36.064718696392

LOC653820 44.2807847072108 46.724453555676 44.3344900481112  
42.3887531663733 64.8367546135053 51.4349390827895 54.90137085079  
48.9393675671956 53.8716214229685 42.3288275690551 46.201352759435  
40.7281925055215

LOC653829 79.2665546280232 70.9179240997848 76.0240426902567  
96.0770202999531 59.5844022026141 64.3383155834968 79.1432909353319  
117.488737569957 50.6750785584772 106.219480656782 101.28981910937  
87.1109435144663

LOC653830 45.6517320730042 34.15544299189 32.8745892439217  
35.6027791404152 33.5412189543102 32.771863438151 36.8369172900902  
32.0636251428594 34.9428206949566 36.1550293353654 32.0500360504817  
35.8429598823818

LOC653832 39.4250105372135 41.8534933577029 42.0233072093141  
42.4061338151892 44.915045386675 43.2805590023412 42.3194600586894  
42.8482181313226 40.3316153483289 43.1839109702714 43.1931731665131  
43.4290452504928

LOC653841 38.304249186058 44.7829632472754 41.2365089689635  
42.6913548400127 38.9496515344837 45.4882438975269 42.629412460409  
38.4540849632254 40.4220196471124 48.3693338695392 47.5439485437351  
38.745552403895

LOC653852 41.3387790895716 38.7344853699576 39.7411455670172  
43.1847628331565 42.7107928951766 37.3799542961839 44.2166118829877  
39.7509165247419 43.9450023643394 40.3235655331796 43.5710871617107  
40.4639532172338

LOC653853 49.7188990489616 53.4439773326843 45.1569741609597  
48.7646976789783 41.9397336249742 42.7107928951766 52.3242437351389

43.9366081640576 49.641159251878 49.1928206164702 47.712616859593  
46.4952206446229  
LOC653855 40.8681871019812 41.3610369241157 42.640829914102  
49.3654837541353 45.6895223823001 49.7458652239071 44.4639405506967  
37.4484310268909 47.6195009345747 44.8997235283254 46.4753015651202  
43.1805016690297  
LOC653857 39.3275194442012 42.7303139017786 44.4311655729487  
43.6275678329783 47.6195009345747 40.7616966228404 41.3594868055879  
38.1835938174625 42.1046072075724 41.2276963324981 44.1148826235374  
49.2852293703923  
LOC653866 40.6559419616644 39.5595233162192 38.4428081526233  
38.7004513165111 40.2903961886288 39.2623423164488 42.8684958525042  
38.4085832916721 38.3880780363593 41.4397539024976 40.6373400186325  
39.2780515621926  
LOC653867 45.0985088502363 46.0713306971594 49.8344973836834  
44.6905691366696 43.1252272136667 41.9543948167375 38.941855825269  
41.6466169548846 45.5779686360641 45.1569741609597 47.0940613507321  
37.1747156131306  
LOC653874 66.6547247910487 100.205124008648 83.6438735616921  
57.4595416719581 82.3181867658154 63.1091746640396 109.456162739433  
75.7947206223934 116.17887995398 45.5776159432079 49.319499137678  
53.840976437122  
LOC653876 51.0225132036905 50.2696827764943 44.9758339877851  
48.309866878365 52.5645416722441 42.6575535390785 50.6774883370457  
51.3472428383325 47.5564423692142 52.7972156492746 52.022479439889  
49.3087627580849  
LOC653878 35.0202257459026 34.8137085420423 41.3366779545815  
37.5382094267692 40.6723334103791 41.2567470068038 36.9355798143571  
41.6466169548846 39.1790517315259 36.8059561571675 49.0361180089431  
42.0424641526302  
LOC653879 108.156702405177 80.6083247572711 159.506157112627  
195.221917652149 109.594402843796 539.720977763663 58.0969258817391  
49.5185112777773 58.4200819624972 108.63277045284 106.654782265295  
168.269510102657  
LOC653882 40.0557788909923 39.6123051184545 40.0998167098057  
36.9912468186322 35.2163900400329 35.6125439901743 38.941855825269  
33.6816578730693 37.5469247328848 36.0481934423077 39.6403089864678  
35.5523662009011  
LOC653883 48.1125722136997 43.2649781354792 42.7303139017786  
37.7469621225553 37.5556299264699 40.3357777530419 48.1747307200218  
41.4508241771315 37.2810767789306 45.9004543328976 40.1742127891824  
46.7182294568603  
LOC653884 82.6246523811721 134.581057139589 128.776189744323  
113.6408244935 169.001200403896 117.20232751191 194.012210675469  
96.4971762611189 94.4421289055611 67.0489032883986 88.0186381834147  
111.669813610213  
LOC653885 38.385865183581 41.8848959280916 35.8265993915844  
41.3027031037343 43.844855336215 45.7300501624017 42.4939802311136  
40.3357777530419 47.5564423692142 42.5664883002833 44.2925355984056  
44.7401523707775  
LOC653886 42.3433931248155 41.3610369241157 40.5734458834617  
41.6564075217517 40.3452320167286 43.0860383229288 39.1539892144371  
43.5544347011646 44.8997235283254 42.1622837416589 41.3553369544097  
42.57175366709

LOC653887 41.5421429082231 38.1312950900467 37.8386378737561  
41.6564075217517 45.5809132232681 40.040778349137 40.3302268293707  
45.5581356216957 44.7058233759912 45.3530683538086 43.9450023643394  
48.27609330316

LOC653888 673.002926695262 507.307494640785 456.612479133179  
743.463635670141 256.258779434769 318.069132873489 363.947777340854  
262.088864041385 471.59454368268 135.436347750159 188.196662406725  
177.29096218424

LOC653889 40.148780650831 40.8880530359822 39.0775870687758  
37.1894304543751 38.8456942580061 40.650742261428 39.1539892144371  
36.5393857306744 31.6295801599123 38.528621456378 36.8282383070068  
35.8429598823818

LOC653891 41.7397731376692 40.6380495994768 44.4311655729487  
53.2046867327331 43.7517118200398 44.0804700754786 38.5066108855005  
44.8997235283254 45.0997987980157 44.4652605017595 44.7114813656401  
41.6550823405646

LOC653894 44.2350046179299 43.683792219729 43.6670755115848  
39.7411455670172 50.7615314686244 39.2985791324641 42.0605906240248  
39.0620487644635 40.9901805728485 42.2614524730856 40.2649309204478  
40.7704587752083

LOC653895 46.0023068797812 51.6869155634183 40.0998167098057  
41.5464765641928 46.3150221024046 47.9503724044453 41.9393838138203  
41.8417024632349 43.6670755115848 37.2089297656361 42.4580504587581  
45.1735152121056

LOC653899 38.6454098044474 44.1239711172417 40.8420925848403  
37.0732977341185 42.7982502551634 43.8582747295766 38.941855825269  
41.2551966132486 50.4974478884077 44.8997235283254 43.0971787292711  
42.4607795638552

LOC653904 57.1046180136491 49.83247261979 45.4865173433646  
53.9517841438975 54.5683518971261 47.7556758818053 41.5817737564592  
39.5466975353131 40.5912213523345 41.0057887014368 42.6366765186182  
50.2163892855092

LOC653905 44.3355304829989 41.8848959280916 44.9758339877851  
51.7739270955254 42.4864576619427 43.8582747295766 46.0228732507872  
45.2806199505029 44.7058233759912 43.0919221375514 40.9157352260901  
40.3691324547049

LOC653907 41.2424637338424 44.1239711172417 44.0451487108213  
89.9284109077375 36.9060997041453 47.3791873993182 44.4639405506967  
44.797320243931 41.5635499110307 37.6383530120621 38.5668610487033  
35.7451401627836

LOC653917 43.9309845324767 45.7317208802318 44.0451487108213  
51.0175677516029 41.2740822675592 43.0860383229288 47.5963750520409  
47.2009420656854 49.5539622682049 47.4767851750188 43.3085358214154  
41.4508241771315

LOC653920 33.5994525227062 40.6380495994768 39.7411455670172  
40.1804147506786 40.7779767565889 37.5887129572848 39.3585350448719  
37.0390589468421 37.6383530120621 38.6454098044474 38.956280281655  
34.6720534245631

LOC653930 43.8550481835503 40.0527893189096 45.270814840882  
39.2320896829616 43.0860383229288 40.7118677686149 42.4939802311136  
39.6910816302609 42.8530333223554 39.8511044247748 40.2649309204478  
42.2577689927563

LOC653934 43.3638918705225 40.0527893189096 40.1985790927248  
38.8495095797881 38.9496515344837 41.2567470068038 42.4939802311136

38.2782436497441 39.3750969348308 48.1392888470269 38.1835938174625  
42.357910063876  
LOC653935 38.2083710281545 42.3550738181144 39.3709357615493  
40.8681871019812 43.1252272136667 40.7616966228404 37.3799542961839  
38.4540849632254 43.8482802038826 41.6373771565199 36.9060997041453  
37.7526485343328  
LOC653937 41.9407041937973 43.2649781354792 43.4709415392696  
42.6913548400127 39.9697332660833 42.357910063876 41.1507980856436  
38.8495095797881 41.1742244762318 42.3606390470387 35.5179217192467  
37.5556299264699  
LOC653941 36.7356360093603 39.5050383901884 38.6727842796202  
42.357910063876 31.9468644542969 34.0045980663271 39.2533668167483  
36.1375121409002 42.1594905198929 37.6383530120621 39.8184668132023  
34.5633623842083  
LOC653962 28.5895665533366 36.6002100641539 35.8265993915844  
43.074472921841 31.3142073726046 33.0463640202858 34.3633615460307  
34.4896350146096 33.2715481910159 33.2987269789328 34.8383995317036  
37.5556299264699  
LOC653968 42.1537476443423 41.159706131351 39.1799070031819  
37.29566077996 35.9894133432376 39.2248354955045 40.4359177791566  
37.7612949798895 39.3750969348308 44.1379638573455 35.9563099719284  
37.5556299264699  
LOC653971 42.3433931248155 43.5182502375207 46.6588655218735  
39.7411455670172 40.6723334103791 41.4508241771315 51.3064929551674  
41.9315419791594 43.7630587657205 42.2614524730856 41.4508241771315  
38.3291713594599  
LOC653972 51.1055541075029 55.8046062733709 58.5212649095879  
57.8277957325085 55.4919197421746 48.3686935595826 64.4736987797413  
49.5185112777773 50.9010149857308 47.3791873993182 49.5923712603197  
47.6938628797168  
LOC653978 44.3355304829989 45.4882438975269 43.0016969050339  
43.1847628331565 43.1252272136667 43.3785777889265 39.6535880152834  
43.1567024035183 48.9931786790166 51.5855515705917 43.0971787292711  
48.1627097465883  
LOC653980 36.7657614042911 41.2262949117288 39.3709357615493  
39.3750969348308 40.0599807618105 38.4330755397458 39.3999056968598  
42.357910063876 35.4846270205678 39.6251842352088 40.4504608195666  
39.9941474864076  
LOC653981 41.8409927585705 43.0227387991135 41.1367478979484  
41.5464765641928 45.8051846088552 45.2852528185486 50.8388984085636  
37.4484310268909 45.3756389170606 41.8613406887824 40.0766543123257  
41.2437378488025  
LOC653983 43.7585538437696 41.159706131351 47.3861758958576  
45.0798408927912 48.0234896130991 46.574682061365 48.1747307200218  
46.695848687694 47.1744296124496 42.6793753550854 41.7272875295469  
44.5432192783161  
LOC653994 90.1830062843449 167.896094603299 211.390987205942  
92.999328769924 194.012210675469 179.605537867711 124.032371632524  
63.5295088521896 131.307600147917 52.1646670865427 57.2674335547631  
109.211407890602  
LOC654000 47.9915414951747 50.318696054607 61.5824518349507  
48.1662933382789 49.0276886361915 49.5424425850549 47.2131144508464  
47.5425654269182 68.0440199646178 52.6879797806876 54.6015942073097  
54.2560654312606

LOC654002 37.8386378737561 36.0366673493555 40.1985790927248  
35.2143190355414 39.1650142708257 43.5752393599169 41.3594868055879  
40.931294690669 37.3600014814388 36.3612409063792 45.310660704531  
42.57175366709

LOC654010 36.3649677956953 43.8495248991589 39.3709357615493  
32.1218888714537 38.8456942580061 40.650742261428 44.0687697278114  
43.0390857698452 41.6616444147804 49.6203214143464 43.1931731665131  
40.1700117452801

LOC654020 44.6231541342 47.2770121962655 43.9450023643394  
48.4916117779992 42.3685136297603 46.574682061365 49.6872467499977  
48.4670130605028 45.8325181856483 47.1001757441025 41.8168470823451  
44.8372404608604

LOC654023 45.1912496459517 46.4861258030402 44.5134109184888  
40.4359177791566 44.4489662507893 42.8598805316863 42.357910063876  
47.6952179922944 45.1899271235974 53.3059058105836 39.7342718293432  
36.3454320848591

LOC654032 39.4710743516517 38.0834507308871 38.4456289125816  
38.6835649080278 40.7273974755431 41.0582900711341 43.2721716572958  
39.0170123539232 42.7671420440641 38.0078357808393 40.1362682639916  
41.9430737035925

LOC654042 55.9669688396835 57.6651855839307 49.5923712603197  
53.2984459812136 49.452985143568 46.6371881832312 46.4838970014049  
52.9813204449021 50.3082459161777 44.5264064957804 44.7114813656401  
46.1005394461164

LOC654046 45.3872406432794 42.6022652963326 41.0356368374708  
39.066284740632 41.3755760434934 38.6414316877471 41.253645578517  
38.745552403895 46.1101825640108 39.8873706855774 36.7283081422707  
38.1421709520616

LOC654053 55.3153799233744 60.3928833351886 44.3344900481112  
66.5921967967793 49.5666074434383 52.3187919317561 103.447730395424  
103.631449539809 43.8482802038826 41.7405682794166 47.3791873993182  
50.0571060701893

LOC654055 45.8108990837624 41.8848959280916 45.4865173433646  
56.0794100106654 39.4693871570028 42.6575535390785 40.7910160811527  
40.7311497914871 46.8873421271259 41.4397539024976 38.956280281655  
42.9887069977696

LOC654056 39.8662795144616 34.15544299189 33.553634633839  
38.0958223740111 37.6527901109005 36.2768299545794 35.7055410599146  
34.8949555140527 34.8552366193358 42.2614524730856 39.0550139257658  
38.1421709520616

LOC654069 35.4596455841176 43.8163035242859 40.6737160001291  
41.9635525160083 47.1566888648998 40.1428591998404 41.0995198212729  
40.3730429236163 41.6616444147804 37.5672792721124 38.8193634966943  
41.3481355128089

LOC654074 51.413025495745 52.3896785600751 49.1067959632109  
67.474556589181 53.0419743379342 56.4819802857598 59.3549213146532  
60.6706478075023 58.0722340887264 51.4454142248566 53.1505787220552  
56.8534370691413

LOC654078 46.1673159982664 37.6383530120621 38.5045333213784  
36.6501141438378 41.5668884168669 44.4619248757502 39.8695929627783  
39.853866204927 35.6970528713709 42.1622837416589 41.6336636285875  
41.1554481567603

LOC654080 38.957687788868 34.6306468196142 40.6737160001291  
39.066284740632 40.2449343247539 47.2009420656854 41.706879587091



44.0390019242862 44.0519245668737 39.3698811593364 43.0016969050339  
43.4709415392696  
LOC654085 44.5282181324797 33.5924201549249 40.4070046183108  
41.4273122914951 44.6834648302383 43.0860383229288 40.0052661202207  
39.6474008369935 38.8271346375425 38.3092241935352 39.153226699662  
37.7526485343328  
LOC654088 41.0608773166058 40.4359177791566 40.0998167098057  
43.9282059368202 42.269054475455 45.3882138838137 41.8315602975157  
36.3405039629059 40.0403898620771 38.6454098044474 38.2795150354677  
33.0217499673686  
LOC654091 30.7315474127249 31.6295801599123 30.3888349004556  
37.29566077996 36.4434672195785 35.7034203372528 29.9775071862804  
37.1317006162938 32.1218888714537 34.4875013487777 33.4071187618571  
35.5523662009011  
LOC654092 45.0985088502363 43.9421822132391 36.6522278218553  
44.9370339275041 43.5544347011646 41.159706131351 44.8643898647322  
40.4359177791566 45.7452456977857 33.7883338848419 38.5668610487033  
44.4475838947656  
LOC654096 40.0557788909923 47.9128504683618 46.7508829977587  
34.6468794865286 36.5393857306744 54.4753345912615 38.5066108855005  
40.4359177791566 34.8552366193358 48.7414853386615 46.3370338074996  
50.3118072462443  
LOC654101 35.5179217192467 43.9421822132391 35.4484652445078  
42.5664883002833 46.9906120932727 40.244271403831 42.7431359850339  
43.0390857698452 37.8319142847141 41.7405682794166 40.3452320167286  
43.9541718254769  
LOC654103 336.737571879156 76.5411379733694 164.343309332109  
406.668753694984 113.18951586976 153.279284223069 128.766242896259  
140.921774805792 99.3797043236938 191.253860976433 209.986313475002  
180.756651647731  
LOC654106 35.9305494063137 37.10170285405 34.1806289878747  
42.0102671859606 41.8806343997257 37.8102105794655 38.1793598983615  
34.4896350146096 39.9444191873552 43.7303813515864 41.4508241771315  
40.6614700944853  
LOC654109 37.0320432433314 37.8217989841918 35.0970060242246  
32.554751989205 39.859345745831 39.0266821712099 30.8360322325222  
40.4359177791566 39.1790517315259 31.9895827886879 44.7114813656401  
41.9430737035925  
LOC654113 50.1533437545239 41.3610369241157 38.9790184198145  
40.9607305725196 40.3452320167286 28.3262844159644 41.9393838138203  
43.1567024035183 36.0741672064298 37.4302011516587 35.1470994647364  
35.1451084093692  
LOC654114 32.9174234020987 41.9894412416874 32.4466419672036  
28.6786952763294 32.9756367838345 39.2248354955045 38.4005795891396  
26.6357008041456 31.9468644542969 36.6893251782922 32.8881500803623  
34.4570158133896  
LOC654115 41.2424637338424 43.5182502375207 45.8844325913247  
44.6905691366696 44.147557390293 47.7556758818053 44.2166118829877  
44.293922970134 45.7452456977857 48.0211752672327 46.824299585607  
45.5800840647989  
LOC654116 44.9896851005259 43.5182502375207 43.1931731665131  
45.0798408927912 49.32293280121 43.8582747295766 41.0381860307445  
47.5950227477807 44.2607789091176 42.5664883002833 41.0050831223107  
40.3691324547049

LOC654117 42.1537476443423 37.6383530120621 38.5045333213784  
40.9607305725196 41.6806984441849 35.314469458379 35.2163900400329  
37.86982638952 42.0621425894624 41.3321861371202 40.0766543123257  
41.1554481567603

LOC654118 46.9939712192224 41.159706131351 43.9450023643394  
49.7350276169552 44.7829632472754 43.9724628401189 47.5963750520409  
43.1567024035183 43.6670755115848 44.7958122466628 43.9450023643394  
39.9519547348106

LOC654121 155.693953208351 115.221134337342 133.798096986107  
164.612971085488 159.797219482154 153.139323479953 113.866742186841  
137.555275829874 182.06733830953 77.4999637278723 90.4909052059366  
159.12163104195

LOC654123 41.2773842727759 44.6360645306497 40.3397581924196  
48.7646976789783 38.6213341190836 45.6706505553383 43.3832826368789  
42.4580504587581 43.6670755115848 50.007830364606 43.844855336215  
46.1592873342534

LOC654126 46.0023068797812 49.7188990489616 47.6011852619859  
51.223859150798 47.7596919358651 45.6129956328415 57.0218130094212  
47.945438269111 50.7619345314571 48.9259041798949 47.6333826891425  
44.6054547125617

LOC654127 41.9407041937973 40.8880530359822 40.301483914446  
42.2496337895968 39.7568367479301 39.2248354955045 38.2933870238743  
33.2467975244196 41.074824727477 36.5806287103157 38.4689132737495  
37.1747156131306

LOC654128 38.50072042426293 41.2598458726002 45.6989664108554  
41.7614975630362 42.9090346219023 40.1428591998404 42.357910063876  
41.8417024632349 45.3756389170606 40.2112371512838 41.9908237694988  
43.8575940017119

LOC654133 41.4508241771315 42.8542642792862 40.4882741869718  
42.357910063876 46.9906120932727 38.4330755397458 39.7576136507593  
42.0494116081998 43.7630587657205 43.7303813515864 38.4689132737495  
45.1735152121056

LOC654134 39.7576136507593 34.0382693188794 39.7411455670172  
36.9912468186322 38.3561682218911 35.8227939208521 35.4623691645629  
34.8949555140527 34.5633623842083 29.745266251498 35.9563099719284  
40.6614700944853

LOC654135 65.9273663561152 98.5746416750459 97.1271615802556  
60.3481762331447 99.5058761858884 57.1752846228778 90.4957279507369  
65.813547096222 78.6048653630165 49.8393069675192 54.6089451252049  
60.6653636336244

LOC654147 42.9104454767916 47.087835967892 38.0452862258803  
38.745552403895 42.4864576619427 42.6575535390785 43.0930293831497  
35.6825474397235 45.7452456977857 38.3092241935352 39.3667161654772  
43.0930293831497

LOC654155 61.4884606677516 65.2001674269291 79.7733480606334  
87.114638423256 68.0414563597154 59.7009992986607 73.8313212063649  
80.2680308979464 63.7046039657949 69.7729022157455 62.358854072801  
65.0495374451854

LOC654159 40.6559419616644 35.8227939208521 38.8775560911841  
41.0726336841311 42.6022652963326 41.0582900711341 40.2154497375715  
40.6171774724171 37.4540772310118 44.8997235283254 39.2542963855807  
38.9496515344837

LOC654161 44.436995101921 52.3187919317561 57.6371756925687  
66.224559122062 50.8875036861067 69.8832723783498 69.4677195088043

53.1052228246467 61.8824218975538 46.0119912782855 49.9338905397767  
51.3244198342335  
LOC654163 40.4639532172338 40.0527893189096 41.6977706798234  
31.4228928703009 40.3452320167286 40.8634043028528 41.253645578517  
38.2782436497441 42.2577689927563 37.1275334308172 35.1470994647364  
38.3291713594599  
LOC654164 46.3390850717989 43.683792219729 57.423873475544  
52.1201052574162 45.2556760873335 40.040778349137 49.540449125788  
43.6434576713809 49.4786466722535 41.3321861371202 43.0016969050339  
54.0374522273907  
LOC654165 44.9896851005259 40.9731067463382 42.7303139017786  
49.3654837541353 43.4544762830742 48.1591264215184 37.7136011474903  
42.0494116081998 44.8003345643334 52.0999467564713 46.7386599624801  
39.2469742642337  
LOC654172 48.2549905619119 39.932537801639 41.7419877611072  
42.8235313007746 45.8051846088552 42.8598805316863 43.7540438144593  
41.3506832276112 40.9512974748357 42.4594149893798 39.8184668132023  
42.0709558258414  
LOC654174 64.668912004173 76.6346767983285 70.6065558064758  
88.715256326632 65.3019328668633 71.3272569463294 57.8870110456492  
59.0262390168156 63.1091746640396 45.2023300009435 45.8180710486329  
63.2699016184868  
LOC654187 39.5676051939342 40.7952353240579 43.5710871617107  
42.8235313007746 42.4864576619427 37.8102105794655 41.5817737564592  
41.8417024632349 39.4762546236449 37.7315666632629 42.7275315121163  
38.9496515344837  
LOC654189 48.4459451445651 54.5374188496807 56.1434024065079  
56.3471340054074 72.3508448479791 74.4508307047509 58.0458175620469  
71.5062409407193 58.9469577494939 50.3910151654231 61.9976238937207  
59.4465684293847  
LOC654191 89.1632548302738 77.518381991736 94.2275161759277  
127.375858030077 77.8355333140359 76.1019439127881 47.7390230243778  
110.869341159607 65.7924490713262 76.4439037944547 87.2316853416374  
63.4685821260797  
LOC654192 41.8409927585705 45.3486182278177 43.0016969050339  
38.9534635879195 41.3755760434934 39.8455060654531 39.1539892144371  
49.6203214143464 43.5669306063196 42.6793753550854 35.3362091871364  
41.4508241771315  
LOC654194 622.435313940734 622.699896083816 637.565156571985  
728.679189702033 1018.35211991691 327.912730756303 398.538881167487  
976.566026758227 615.011590811277 231.198764780818 268.936151471133  
1364.06060391538  
LOC654200 34.3473914754963 31.7145380049678 40.8420925848403  
36.4564050256915 36.2048942610546 35.8227939208521 31.5556621809114  
35.9023742468744 32.4931776430014 35.3849221682845 31.3983249770297  
32.3796054199032  
LOC654201 51.413025495745 83.0574731969818 44.0451487108213  
53.3967242431461 41.9842695818285 55.1987351219665 42.9803717121865  
47.6952179922944 39.7537274655115 47.1001757441025 44.2142581488029  
49.6629259325705  
LOC654202 40.3478825593224 41.8073910693411 45.989212296035  
39.2780515621926 46.5557478175976 40.4359177791566 44.0687697278114  
41.3506832276112 43.8482802038826 45.1569741609597 42.4580504587581  
45.8546719310325

LOC654203 41.3387790895716 40.0527893189096 38.7745734037492  
42.8235313007746 44.2607789091176 41.554942319225 45.3597029614942  
40.931294690669 37.10170285405 41.7405682794166 38.8507804383261  
42.6758568421347  
LOC654206 37.6397652536077 40.6380495994768 41.1367478979484  
41.8778873678551 46.0977687311222 45.1873487463472 39.7576136507593  
45.1714698794331 44.619512785899 40.4136535208406 43.9450023643394  
40.2669497398702  
LOC654208 46.3390850717989 36.3110701990588 39.2707964550441  
37.29566077996 41.9842695818285 36.4986986135769 35.0305278582179  
40.4359177791566 38.9834959368496 43.7303813515864 42.4580504587581  
40.9683275553869  
LOC654209 41.3387790895716 41.159706131351 36.9795961564828  
40.0698728584484 43.2484996523549 45.9266745571724 43.0930293831497  
40.2382908228517 38.8271346375425 41.4397539024976 43.0016969050339  
44.6484005362281  
LOC654220 48.9906383294199 46.8236022402545 56.7776874358774  
49.5424425850549 42.1650127805175 44.9896851005259 52.4111687156893  
46.5717043290731 43.8482802038826 49.3000844711116 41.0050831223107  
43.0930293831497  
LOC654222 46.6348258763289 34.3715326040967 40.301483914446  
40.3180310664156 40.5710637884029 44.0804700754786 44.0687697278114  
40.5158867964016 43.5669306063196 35.93950183586 37.7384958256497  
34.9138625012006  
LOC654230 43.6706764143908 38.0226905622357 46.2625470410195  
45.5869891570251 46.6397391251762 41.159706131351 43.8206425661746  
38.3684202018524 34.7722083264266 42.9866214102525 44.8872784170036  
40.7704587752083  
LOC654235 38.1169703906207 44.1239711172417 42.640829914102  
47.8164193292842 42.269054475455 46.1513019317765 43.6753843488695  
43.3262148375525 46.8873421271259 46.5650556481721 39.5399188536544  
42.0424641526302  
LOC654244 51.1055541075029 51.6060290544385 53.5698357689852  
54.4586176399381 62.4267404482092 49.1013967533186 44.6032218589199  
47.9942520395434 50.7258407289028 41.3321861371202 46.5308571957384  
43.3262148375525  
LOC654249 45.1912496459517 44.8529259387308 42.157627240486  
46.3203995372658 41.467005949568 40.1428591998404 39.4600924554505  
41.9315419791594 39.853866204927 42.1622837416589 45.310660704531  
42.2577689927563  
LOC654252 42.5193208629123 41.159706131351 39.6451483836089  
44.0451487108213 43.9450023643394 44.8872784170036 46.5650556481721  
45.0972184964705 43.9450023643394 40.8970401536578 40.9157352260901  
42.1537476443423  
LOC654253 38.385865183581 42.0709558258414 46.4569566520107  
36.1562979552173 33.8558232866797 42.0574848021044 40.3302268293707  
44.8997235283254 38.9006788676407 38.3092241935352 43.4709415392696  
36.7762265039864  
LOC654254 33.5994525227062 42.0709558258414 42.8270038153139  
50.8567345921473 43.4544762830742 48.1591264215184 42.629412460409  
38.1835938174625 45.4799270968969 37.7315666632629 42.4580504587581  
44.1452943804044  
LOC654256 48.0201377454632 45.1694246393676 43.5710871617107  
41.0726336841311 46.1804647841331 45.1873487463472 45.1017494688414

49.2901038327894 45.9227107476843 45.7911932481722 50.0303076717704  
49.3087627580849  
LOC654258 37.2474303302343 46.0713306971594 45.2313723727673  
37.0732977341185 43.5544347011646 41.9543948167375 41.706879587091  
46.695848687694 45.9227107476843 40.8049408996274 42.2618615571566  
42.1537476443423  
LOC654259 46.1673159982664 42.9358255168086 45.1569741609597  
46.7577982595088 42.4864576619427 47.0940613507321 46.7100796279384  
49.3880946790306 42.992884918158 47.1001757441025 41.9908237694988  
42.6758568421347  
LOC654260 80.0866955521632 53.1278271804774 54.4384603094793  
48.4916117779992 53.3086645804786 52.3187919317561 74.5591290353333  
64.6316818494785 68.6379135603075 52.7972156492746 52.104880481326  
47.9566297250148  
LOC654264 41.8409927585705 42.5269793679335 43.6670755115848  
44.6905691366696 46.3150221024046 46.263826584899 46.3057385979341  
46.4672637826582 44.5303781239209 40.1179210534118 47.6125796208753  
37.7526485343328  
LOC654335 41.8409927585705 49.9547657591437 50.7502704822135  
45.4634652319753 54.5683518971261 42.6575535390785 49.8281348927244  
49.3880946790306 52.2631308081333 42.785429206422 45.7328341667151  
46.8129509799753  
LOC654340 42.2455707947223 41.8848959280916 41.3366779545815  
39.066284740632 36.9702228618069 47.0027453663546 44.3440839686558  
39.7509165247419 38.0213051227859 42.1622837416589 41.2598458726002  
42.8864415494484  
LOC654342 45.1912496459517 43.8495248991589 46.3411353377615  
41.0726336841311 44.7829632472754 44.6524308640784 39.5496902678788  
46.4672637826582 41.1742244762318 61.2604442862522 64.4570366205389  
61.2108152457954  
LOC654346 51.7607563002005 77.0244607682203 51.3268475761593  
92.8026641003757 54.4586176399381 51.702461863489 108.007227281411  
89.7806631815779 74.4958282816601 44.571915452417 52.7817052791259  
40.6614700944853  
LOC723972 56.5094373275922 62.0908175930716 43.9450023643394  
45.7397504535169 60.9710783023013 64.0985088513857 77.0003455479124  
98.4405692451144 57.678188678075 57.165971310746 62.9336909080086  
83.0460206754856  
LOC727726 71.2246788429078 76.5960150436512 77.1614179978243  
65.524821699432 75.8976034525022 71.3932787152381 83.3322777515023  
65.3019328668633 85.7842344710572 55.1804535845496 62.358854072801  
68.8529879402902  
LOC727732 42.7150227340364 41.554942319225 41.2365089689635  
45.5869891570251 40.5710637884029 40.0766543123257 41.3594868055879  
39.4710743516517 40.3316153483289 41.7932258301997 41.9908237694988  
41.9083581529276  
LOC727735 39.2234732618814 42.5703589007959 39.8682679733801  
39.9697332660833 40.2098193905875 43.6490048876386 44.14228771963  
41.6764433703289 42.6887543182789 38.1472552468971 40.4044145085966  
44.1915202657512  
LOC727737 46.3390850717989 44.6918600441328 44.6032218589199  
43.4410741327254 44.0451487108213 41.7627910693483 44.7255207589606  
44.293922970134 45.8325181856483 42.1622837416589 45.5707650534259  
41.5536168238478

LOC727751 41.4508241771315 50.0425298550559 39.7411455670172  
54.6089451252049 52.9433495155796 40.1428591998404 42.9803717121865  
42.357910063876 43.4656637536244 44.2580151149956 37.4642807402741  
45.3763275588341

LOC727752 38.7537364570873 39.2907645923217 39.3709357615493  
39.7411455670172 41.467005949568 34.7983399096627 44.0687697278114  
43.6434576713809 38.3418933808844 38.4187686307607 41.5421429082231  
46.7182294568603

LOC727759 42.9104454767916 46.1569135229922 47.0055981216687  
44.1483976313959 44.4489662507893 44.6524308640784 47.8947595316832  
44.2159020605784 42.1594905198929 47.7180816682562 45.1432412071268  
43.1805016690297

LOC727761 108.156702405177 183.165559564289 124.032371632524  
85.2893380711323 109.622911610979 85.3086977427271 210.524799041662  
126.171040948196 242.190059393491 51.9247097592613 66.737740728688  
76.1453055441256

LOC727762 79.8196996067124 67.4984616497574 80.6674009289482  
53.8086134112366 105.267519627444 50.8930565655395 65.7873990226533  
68.1780382173625 63.1566669782858 99.4546022538476 83.8113149043718  
81.3082994649699

LOC727773 47.7806898452396 48.9737731558494 49.5143331736386  
47.5918662650243 50.4586647350401 49.1013967533186 48.9155368657318  
45.4868627244592 47.9035532886869 45.9356781508849 46.1960490865583  
43.2776458914333

LOC727775 38.8561375693335 38.0226905622357 37.8386378737561  
44.550322123994 41.6806984441849 38.6414316877471 38.7337086062875  
43.6434576713809 38.2215591930186 44.7958122466628 38.2795150354677  
47.3172462673426

LOC727778 33.5994525227062 43.7644428186265 41.6977706798234  
35.314469458379 42.7982502551634 41.159706131351 37.7136011474903  
41.1575777497576 36.6312676076142 36.8059561571675 29.6891949090828  
34.3409660445447

LOC727787 42.6036491382658 42.6939394537076 43.3085358214154  
48.856176220627 45.3675390992851 37.4782441311626 43.1931731665131  
44.6107027295193 48.0163377492228 43.9450023643394 45.9104478407175  
47.3992733452821

LOC727791 40.2543341073001 41.0678614026819 41.785676764591  
52.1201052574162 50.8875036861067 44.3648993568405 44.7255207589606  
48.87875862356 40.9901805728485 42.6793753550854 51.4413099192899  
43.3744503319109

LOC727805 40.148780650831 39.6123051184545 38.9790184198145  
45.1944222548351 43.844855336215 45.3882138838137 38.8417151851134  
40.6171774724171 39.3750969348308 40.1179210534118 41.8168470823451  
37.8490162439785

LOC727811 42.3433931248155 37.6786104343959 36.8730514568925  
37.29566077996 37.8679241954337 35.2067831864574 37.9946685306274  
37.6058760248614 41.074824727477 35.5723224447141 40.6723334103791  
40.2669497398702

LOC727815 43.9309845324767 40.9731067463382 42.640829914102  
48.9944486068347 43.3896803974186 44.9896851005259 47.5963750520409  
41.9820792173615 46.3563690926644 44.2580151149956 47.0940613507321  
43.5420658412177

LOC727820 69.6449298794042 100.326655761429 93.4180535865914  
75.7666827480067 85.7842344710572 66.5234828659154 124.112216491975

72.9752827496503 87.8724689898823 89.3989848564067 91.8414653633828  
74.9294208313176  
LOC727825 74.2151462073098 86.9709077763908 80.531334073336  
72.6824533717231 94.8408264309872 60.7488007939604 89.4747568145717  
71.7336217321663 89.0684909049451 80.6200293361016 75.1853590860646  
61.8529316708431  
LOC727832 40.2087556903277 38.3874422458351 44.4652605017595  
42.281606728072 40.148780650831 37.5469247328848 41.8799523546812  
36.801808772895 40.2615278292875 43.2988017098387 38.4251036088595  
37.3600014814388  
LOC727837 40.8681871019812 41.8848959280916 42.0621425894624  
46.7577982595088 51.1368583672022 46.263826584899 41.0381860307445  
45.8669209716694 42.9020321355927 51.1169368198437 38.3684202018524  
35.9604262434141  
LOC727848 51.8122261766744 56.0642694832108 54.6820069269589  
58.7338159410728 57.1187536733236 56.2229687620557 58.6431245059655  
51.2623287419357 57.2716485658185 47.3010040326346 46.3635803515159  
48.9733758107788  
LOC727849 41.0608773166058 42.6022652963326 39.7411455670172  
38.745552403895 46.1804647841331 43.3785777889265 44.4045701012801  
44.293922970134 42.3138951003676 38.2069499294002 38.956280281655  
44.1452943804044  
LOC727851 36.2496364442264 42.1607322031054 37.9482157381008  
38.2599935139101 40.0599807618105 40.1930209223556 45.017247592678  
39.8965727231863 38.0213051227859 37.5597671487621 44.5878355090414  
42.4607795638552  
LOC727855 47.3791873993182 47.4740726032707 46.6588655218735  
57.0629653735694 51.1368583672022 42.4580504587581 45.7452456977857  
48.6441988290952 42.5406888281114 45.3530683538086 43.6629145624937  
39.9519547348106  
LOC727866 55.0078788655089 70.2553917409773 83.0959169307948  
60.7741670229412 82.7394574977114 62.1857038870283 49.8281348927244  
48.1591264215184 69.8899273527731 46.441301934328 50.6473771879221  
51.4968903591058  
LOC727909 38.8561375693335 38.3322849790657 36.1042012504758  
41.1886975241176 38.3561682218911 41.0582900711341 37.830876898596  
41.1575777497576 40.5912213523345 32.7876527533679 40.0766543123257  
44.0451487108213  
LOC727922 44.7044140979108 42.1607322031054 38.8775560911841  
42.4580504587581 39.2608760193011 45.0882356578404 46.7100796279384  
49.2901038327894 40.0403898620771 44.8997235283254 42.8263096141654  
42.4607795638552  
LOC727927 42.3433931248155 47.6914221838216 40.5734458834617  
42.357910063876 47.8075998240396 39.8455060654531 42.4939802311136  
44.2159020605784 51.1055541075029 41.4397539024976 42.6366765186182  
43.0930293831497  
LOC727934 44.5282181324797 56.3560498705517 43.5710871617107  
50.7046706880325 44.4489662507893 44.5544727111028 49.1067959632109  
42.7431359850339 42.8036731479932 41.5435611403119 50.1649089793069  
50.5511827666954  
LOC727935 47.3289285415289 47.3536182445315 50.8634043603791  
64.4736987797413 44.6834648302383 56.6172748471831 52.6510639680705  
49.7922355293199 46.4569566520107 47.7180816682562 51.524711857679  
56.6888826857797

LOC727937 41.6354649482853 41.554942319225 41.437237454134  
42.1273928203021 46.9906120932727 42.4580504587581 45.7452456977857  
44.4031868028216 45.6582729799009 46.6598879466655 40.6373400186325  
43.6753843488695  
LOC727942 43.2724556187214 40.4359177791566 39.0775870687758  
31.3142073726046 33.3231576795423 34.5886782974123 38.8417151851134  
36.3405039629059 40.4997186069494 35.195364621675 31.7413650507468  
37.5556299264699  
LOC727944 37.3463875295726 41.0678614026819 35.3649449469275  
38.745552403895 37.8679241954337 39.6251842352088 38.1793598983615  
36.5393857306744 36.3649677956953 40.5090849993014 42.170702295259  
42.6758568421347  
LOC727948 54.691568065544 58.1027665533767 49.1067959632109  
68.9937449813561 46.7508829977587 47.4699236780425 42.629412460409  
57.7805922926828 45.2897806651929 54.6089451252049 53.9517841438975  
51.138877923954  
LOC727958 44.7044140979108 36.3110701990588 41.9666541498638  
43.4410741327254 38.4540849632254 41.3553369544097 41.0381860307445  
46.4672637826582 41.6616444147804 42.3606390470387 40.6373400186325  
36.8690774823319  
LOC727987 43.0001432913058 40.0527893189096 40.301483914446  
35.314469458379 37.5556299264699 37.1317006162938 37.830876898596  
41.0381860307445 42.2577689927563 40.7063426028871 41.1638563416981  
40.8681871019812  
LOC727992 37.6397652536077 36.9994058279362 37.1643693306382  
34.9221408381038 37.3508690072156 35.4142595025086 41.9393838138203  
36.7460922671619 37.2810767789306 40.1179210534118 39.3667161654772  
36.7762265039864  
LOC727994 46.0023068797812 42.1607322031054 40.931294690669  
42.9358255168086 48.3814421939888 41.7627910693483 41.3594868055879  
46.695848687694 40.0403898620771 41.1222709786153 42.5426057453993  
38.1421709520616  
LOC728003 42.442231667357 34.7135536792489 33.553634633839  
41.4273122914951 36.9060997041453 36.2768299545794 36.4098694708483  
35.6825474397235 41.4636047919453 41.6373771565199 31.3142073726046  
35.1451084093692  
LOC728004 44.9896851005259 33.8237407699472 41.1367478979484  
37.4223289687135 40.0599807618105 41.2567470068038 42.2577689927563  
40.7311497914871 40.3316153483289 35.8304004211528 42.0750889188255  
38.1421709520616  
LOC728005 39.4250105372135 38.7578265341627 39.9101908547397  
39.7840818430159 42.1650127805175 40.5805725503899 38.4456289125816  
38.1835938174625 41.074824727477 39.8873706855774 36.5675023356094  
38.3834435509221  
LOC728006 199.181938253995 135.138667957956 241.455752070163  
206.125013129462 116.540209248478 138.521956104698 187.462631817772  
134.664025291418 129.820909990346 212.152751915521 170.172720177618  
157.040132256772  
LOC728012 46.263826584899 38.7344853699576 41.3708420203838  
41.6564075217517 41.9397336249742 42.6575535390785 43.1602899171656  
42.0847226073592 43.7630587657205 45.3894119568143 42.4162492820012  
43.6753843488695  
LOC728014 115.221134337342 287.883101814563 191.811190401876  
86.8785761077662 173.711189659585 61.1751736985663 352.600793906035



162.833785414988 278.453446231317 258.446095955014 241.486113826383  
165.42634596698  
LOC728032 41.3387790895716 39.3999056968598 53.5698357689852  
39.7411455670172 45.1137938810047 44.2607789091176 44.7255207589606  
47.2864663693787 39.2809305246091 38.957687788868 41.7272875295469  
45.0035308952466  
LOC728037 141.977447082092 171.992427227088 141.784776736918  
92.999328769924 276.149150203786 108.39424630351 226.090904721424  
358.779372054826 111.056599389048 107.501868837432 102.559678338485  
62.7669079605627  
LOC728044 39.1590964332473 40.148780650831 40.4882741869718  
40.646702696033 41.1868052124344 40.5281496800812 52.0942589368478  
37.1317006162938 40.2274522635576 39.2623423164488 37.9946685306274  
36.9976231206067  
LOC728056 37.2474303302343 34.7135536792489 38.2280071951674  
36.6501141438378 40.0599807618105 43.0860383229288 39.4600924554505  
40.047314525032 41.5635499110307 43.9450023643394 36.131485826118  
41.7575097298927  
LOC728066 39.4710743516517 35.4484652445078 37.5597671487621  
39.3750969348308 36.2048942610546 39.4953494583071 38.1793598983615  
42.7431359850339 31.859589438824 41.0057887014368 46.2560238004757  
45.2783024981315  
LOC728069 75.2475238554276 66.3904351698776 69.24946602508  
483.416873464931 67.3568864741196 98.0473811574767 74.0039764902057  
74.5173894803763 74.9179396623258 81.0880833950735 71.3197554517106  
93.523394623588  
LOC728070 42.2455707947223 45.4882438975269 41.9666541498638  
45.5869891570251 51.0107745412152 45.7300501624017 42.9803717121865  
41.1575777497576 41.1742244762318 41.9666541498638 39.153226699662  
43.4709415392696  
LOC728080 43.0001432913058 40.0527893189096 37.8386378737561  
40.9607305725196 45.2556760873335 42.357910063876 38.8417151851134  
41.0381860307445 40.2274522635576 41.8613406887824 41.6336636285875  
46.2625470410195  
LOC728081 40.6559419616644 37.8217989841918 42.157627240486  
40.5484717678957 44.7829632472754 42.6575535390785 37.4772922422734  
42.8482181313226 37.3600014814388 48.6124127998952 40.9157352260901  
48.0350549043063  
LOC728089 44.7044140979108 44.2630383225933 40.7620472083159  
44.9370339275041 47.9128504683618 41.9543948167375 43.3262148375525  
39.1652965788406 42.5406888281114 42.0621425894624 44.0409178714232  
45.3763275588341  
LOC728094 45.5758521267508 38.5252456306656 44.1452943804044  
44.7980740332174 41.3755760434934 35.2067831864574 43.9450023643394  
42.9301944191913 37.6383530120621 50.8826620053386 42.170702295259  
45.2783024981315  
LOC728095 40.4639532172338 37.3634897565502 36.6522278218553  
38.8495095797881 37.4470183315826 36.6271061451613 45.7452456977857  
39.6474008369935 39.853866204927 44.571915452417 46.7386599624801  
37.0953622406687  
LOC728103 39.6609238036815 43.7644428186265 40.0998167098057  
38.3166554965434 41.467005949568 42.750861693377 37.7136011474903  
38.1835938174625 40.5912213523345 40.7063426028871 39.4410515050885  
38.3291713594599

LOC728116 37.6397652536077 44.1239711172417 44.6032218589199  
39.853175885492 57.9161791762225 41.9543948167375 67.0455170947389  
57.5640428227111 49.0986627051784 44.571915452417 48.8088340735921  
43.7672102682067

LOC728117 37.6397652536077 34.7135536792489 39.2707964550441  
41.8778873678551 36.6354013629791 37.9951997351435 39.7576136507593  
35.3608605269276 43.1805016690297 42.5664883002833 43.0016969050339  
39.2469742642337

LOC728119 39.3709357615493 45.4882438975269 43.5710871617107  
36.890925044696 42.0709558258414 43.5752393599169 41.706879587091  
46.1673159982664 41.3803269429468 45.1569741609597 41.0808257270221  
46.8129509799753

LOC728127 52.7948184519106 51.524711857679 62.056770439781  
45.1944222548351 58.5450868286167 55.9351706773613 44.7958122466628  
47.2009420656854 67.5047089908724 49.913842155937 48.4928863469279  
52.7156971154405

LOC728137 36.2496364442264 38.5252456306656 34.806104801006  
38.9534635879195 39.859345745831 34.3887641786747 39.5496902678788  
33.5578650644246 35.3227485563945 34.4875013487777 36.3390947880186  
32.4951076826876

LOC728145 41.7397731376692 35.8227939208521 37.4642807402741  
40.4359177791566 39.7568367479301 42.5660695551615 44.3440839686558  
42.5435283762933 37.10170285405 36.8059561571675 33.8558232866797  
37.6557714476853

LOC728153 130.379966531543 117.706922397135 107.309776354951  
260.383969219887 80.1294564809102 162.80817471208 130.506891299903  
145.335751135441 105.825228126465 127.685709088018 163.844659359002  
141.376779431031

LOC728160 43.7164681443605 65.3319639385976 41.0356368374708  
43.5627649099623 41.8806343997257 38.4741160538511 41.0871827071116  
43.844855336215 64.3425836997629 42.6793753550854 43.363245077835  
38.6454098044474

LOC728181 37.8386378737561 40.0527893189096 37.8386378737561  
39.853175885492 40.9950639693255 43.3785777889265 39.6535880152834  
43.1567024035183 44.8003345643334 35.3849221682845 41.0808257270221  
38.6454098044474

LOC728183 37.8386378737561 40.5400384479766 41.437237454134  
35.1451084093692 37.4470183315826 39.3841861812262 36.5352572191451  
40.1474543172332 34.5633623842083 36.8059561571675 35.6041926503637  
39.9519547348106

LOC728185 41.7397731376692 32.396635964353 33.281531405287  
28.3262844159644 32.9756367838345 37.2686490268265 36.5352572191451  
28.6786952763294 34.1294694030979 32.6203270051744 34.174642681781  
38.6454098044474

LOC728193 43.9309845324767 49.1283590719461 50.6004078448405  
52.3004056941891 56.9360840563854 47.7556758818053 53.7423898357583  
44.9977782988116 47.6195009345747 43.0919221375514 41.7272875295469  
42.4607795638552

LOC728216 40.6559419616644 40.2493681589104 37.9482157381008  
43.8002456102021 41.1868052124344 43.7630587657205 41.9393838138203  
41.8417024632349 42.5406888281114 41.5435611403119 40.547835538778  
42.57175366709

LOC728219 42.2455707947223 44.4411734611229 40.7620472083159  
45.334106390212 42.1650127805175 42.357910063876 44.7255207589606

41.7419877611072 42.357910063876 45.4614234442527 43.0016969050339  
42.6758568421347  
LOC728226 50.6473771879221 72.3822545261582 50.6004078448405  
67.6034960135297 50.8373208590626 50.560825686187 59.3549213146532  
48.8333989709933 45.7873395324682 61.0935621637178 50.4740079109854  
46.4136802014079  
LOC728229 52.109723558511 66.4300949831964 46.9040704638073  
47.6687908290818 50.8875036861067 44.8872784170036 47.4439407315335  
46.9986083378817 60.3977304934451 42.785429206422 41.7272875295469  
36.3454320848591  
LOC728241 41.9407041937973 43.4396866157171 40.4882741869718  
41.4273122914951 46.5557478175976 38.4330755397458 38.6243997507646  
40.5158867964016 45.1899271235974 40.3235655331796 38.2795150354677  
40.0557788909923  
LOC728242 47.0940613507321 47.1332119496722 46.3411353377615  
40.0698728584484 48.3814421939888 40.9506062495231 49.3854238365325  
46.695848687694 53.5677764726461 45.4614234442527 44.4688999098904  
43.3744503319109  
LOC728248 36.9060997041453 39.1982470626863 41.2365089689635  
40.0698728584484 40.7779767565889 40.7616966228404 41.0381860307445  
43.7396619462033 38.8271346375425 39.6719190054379 38.6662194645633  
31.8554734753953  
LOC728269 44.1294459089314 157.7623351008 131.79241580689  
44.2166118829877 290.371909722404 73.7400293044315 39.5496902678788  
85.5881739836215 233.635083076472 45.1569741609597 42.6366765186182  
41.7072675309997  
LOC728276 40.5654775358427 37.3634897565502 41.6977706798234  
44.9370339275041 41.6806984441849 39.3841861812262 41.706879587091  
39.1652965788406 40.5912213523345 35.195364621675 46.0095710163378  
41.3481355128089  
LOC728285 36.7356360093603 40.6380495994768 35.9305494063137  
40.4359177791566 36.7356360093603 38.3418933808844 36.634024014558  
41.9315419791594 33.9456837661864 39.1621898366355 37.3687900733549  
37.7526485343328  
LOC728302 40.2543341073001 41.554942319225 43.1931731665131  
38.6414316877471 42.7107928951766 41.8613406887824 45.223075311113  
39.6474008369935 43.4656637536244 33.8984830800739 41.5421429082231  
36.7762265039864  
LOC728308 65.5495324730507 59.7686826549947 64.6111899743678  
48.665578118898 79.3889841821749 46.8954576545929 59.5205055437765  
53.6210959113222 52.9482338979681 52.4351670989268 69.9652162720742  
50.656598108034  
LOC728320 34.9138625012006 38.2263227947189 32.6121532029976  
35.8472302065546 44.6834648302383 34.8956628705329 37.4772922422734  
37.5511560880902 37.8319142847141 32.5178504369282 37.2892641289258  
34.6720534245631  
LOC728334 40.4639532172338 47.087835967892 42.9104454767916  
42.1273928203021 35.3327761997046 42.0574848021044 42.357910063876  
46.5717043290731 37.7384958256497 40.1179210534118 42.911855821602  
41.863927676552  
LOC728340 43.6706764143908 40.0527893189096 40.5734458834617  
40.9607305725196 36.8059561571675 40.040778349137 41.706879587091  
46.2779564481158 43.1805016690297 37.1275334308172 38.4689132737495  
39.7411455670172

LOC728343 45.5904110830452 43.8495248991589 42.0621425894624  
42.1622837416589 42.0709558258414 45.4655812388825 41.4417765092034  
44.5658219748173 40.3316153483289 43.6033221838149 41.9083581529276  
42.0688758338976

LOC728351 50.1533437545239 55.3477556906605 55.2141529491512  
43.4410741327254 54.6820069269589 46.3715909653832 57.8870110456492  
44.6107027295193 50.1603795873336 53.9412154719864 47.0110068985119  
43.0930293831497

LOC728352 39.3709357615493 38.5252456306656 32.2133093774284  
40.0698728584484 39.5595233162192 39.2248354955045 41.4742337714895  
35.7973685350741 39.9444191873552 42.6793753550854 39.5399188536544  
47.0130468198828

LOC728358 38.6454098044474 40.3180310664156 39.673290670647  
67.0782129304647 38.5185220021014 41.400731343457 40.3302268293707  
42.9301944191913 38.8271346375425 64.3061875690881 40.3248602167143  
41.7146643589667

LOC728369 43.3098985178373 41.9455842688118 43.3465699185405  
40.591923288644 41.6806984441849 43.8308097066396 43.6753843488695  
40.831207953647 42.4784375889044 45.7371044724173 41.9083581529276  
44.6001024251011

LOC728395 35.8208542506595 41.554942319225 41.9666541498638  
39.6292788039793 39.5595233162192 39.4953494583071 46.8613212048981  
44.1311654985682 43.1805016690297 40.3235655331796 40.9157352260901  
40.6614700944853

LOC728403 37.4554876386402 33.1817617228171 41.437237454134  
36.3604951341921 40.8873907150245 38.3418933808844 38.0598374201407  
43.2551508830106 40.2274522635576 33.6902293666089 38.3684202018524  
45.2783024981315

LOC728411 85.3718124658316 118.075168790221 138.81810375553  
64.898351831341 66.0411740221276 53.3185097662527 109.456162739433  
101.272774711455 152.187430924861 87.6598268114592 112.048972076936  
83.7829283976292

LOC728417 55.0748878261048 64.8254097948745 87.6178717341967  
57.8277957325085 67.6625413926778 49.5923712603197 56.4809146784765  
57.0836219190892 53.0704519012492 51.4454142248566 52.1379596312084  
49.3654837541353

LOC728441 50.4872122867759 79.271901834289 38.2280071951674  
67.474556589181 35.9058393060637 47.5733603903505 62.9165938167938  
42.0494116081998 40.7847110517594 57.7805922926828 45.4799270968969  
51.9447450229707

LOC728452 56.0477607422828 72.93977835851 78.9701459806641  
52.1201052574162 50.6470461863549 48.3686935595826 63.7721358300879  
61.8665316900291 56.1733549054832 77.4999637278723 151.111664091983  
50.7487159427973

LOC728454 53.4921736109774 47.2770121962655 49.3780606970538  
277.837785971587 54.0126916508417 48.5835484742456 54.1707158323527  
45.9604707098953 52.6561576154021 52.0999467564713 47.3791873993182  
51.4308501933893

LOC728468 40.4639532172338 37.2810767789306 44.1452943804044  
46.3203995372658 37.3508690072156 41.2567470068038 34.6720534245631  
33.8558232866797 40.0403898620771 39.1621898366355 36.5359455830388  
37.6557714476853

LOC728473 43.7585538437696 46.29198852834 42.5406888281114  
40.4359177791566 38.4540849632254 106.78552222475 36.9355798143571

43.7396619462033 40.7847110517594 52.6879797806876 68.0414563597154  
53.3904307221902  
LOC728481 745.219025960188 1393.24135330226 1242.75259587926  
880.992328229414 1167.25317435052 1533.38581753491 929.862002014478  
1173.47285626656 1305.35453202355 1122.44489338159 1202.11455437028  
2201.39729904166  
LOC728492 542.069156178791 945.065986430527 571.170643523692  
265.176790020229 753.491584605447 428.206419080492 370.027120412227  
527.037018015766 766.647626178442 384.401256392893 372.758184542037  
550.642253702646  
LOC728493 35.2267149016596 39.1982470626863 40.4070046183108  
38.745552403895 40.3452320167286 40.5281496800812 41.706879587091  
41.4508241771315 40.3316153483289 48.2596564318071 36.7283081422707  
39.8497227447888  
LOC728498 44.0328992213727 44.5152708955623 42.108130037421  
44.265834798964 42.7489468897708 41.5132248356707 45.8311458106942  
43.1931731665131 42.5864346233886 42.0621425894624 44.2925355984056  
46.1592873342534  
LOC728499 144.427680369554 157.979422616649 182.601427407211  
129.592927998658 103.199200862158 80.099836448859 109.14984236229  
167.746168796779 170.593589984253 144.609635554528 299.524171071613  
112.436153468759  
LOC728504 45.4799270968969 39.7835513496873 39.3709357615493  
39.5050383901884 38.745552403895 42.0574848021044 34.9344532055397  
41.3506832276112 50.4974478884077 41.4397539024976 44.3763859390287  
39.0536056496869  
LOC728505 45.6517320730042 78.59966540743 82.5344501505114  
62.3936376596431 97.4137766910365 88.8760662992208 75.164719839017  
49.3880946790306 59.2566572428546 44.571915452417 48.5292718280498  
66.737740728688  
LOC728516 38.0089018744739 35.2143190355414 37.0642268327439  
38.9534635879195 47.5647821785529 41.159706131351 39.1539892144371  
41.2551966132486 40.6957787921451 37.8217989841918 41.8168470823451  
37.1747156131306  
LOC728518 35.5179217192467 46.29198852834 39.1799070031819  
38.3166554965434 38.745552403895 38.6414316877471 41.0381860307445  
40.831207953647 40.6957787921451 43.2988017098387 42.2618615571566  
30.7315474127249  
LOC728519 60.0793579902362 86.3888090084564 71.3527183280827  
129.785929766258 64.0752803796842 89.4747568145717 52.7002314230604  
47.9942520395434 56.657759220121 53.7196173866021 64.4570366205389  
58.112348043634  
LOC728534 45.8108990837624 38.3322849790657 41.1367478979484  
44.265834798964 39.5595233162192 45.1873487463472 47.4439407315335  
43.9366081640576 44.0519245668737 39.2623423164488 45.0589947942306  
40.1700117452801  
LOC728554 396.63268714181 195.635797217403 376.289659542649  
140.504336039225 430.283061862756 195.168348967505 638.848775860866  
658.282562295783 361.776841675393 235.169335305672 187.347386400244  
277.993522959259  
LOC728556 202.459251553516 187.689343320587 220.010492114456  
173.100153934025 235.222472959869 105.945216149549 256.55408314817  
324.582288788326 230.927097824131 138.765621737736 154.509548705054  
188.099292617901

LOC728564 258.851412005402 276.550265506988 191.896416838806  
175.114727506747 458.47341225284 202.01900875263 354.158105175308  
313.115027781064 367.081499539744 141.266956686625 154.707548614663  
246.242210944848

LOC728565 88.7928773498158 121.236881661832 119.979854891563  
92.2530518251152 88.3954618645976 81.3978207813439 101.898612603107  
87.069143362676 114.136234102574 83.6524523974491 112.281286038716  
84.1780237893807

LOC728601 39.4710743516517 35.9305494063137 31.0126568324233  
39.7411455670172 43.7517118200398 43.3785777889265 34.3633615460307  
38.5457716679071 37.6383530120621 37.6383530120621 38.2795150354677  
31.5556621809114

LOC728608 49.4151347850687 49.3581578587582 49.9256753636167  
40.3180310664156 46.0977687311222 44.1737502492846 46.7100796279384  
44.797320243931 55.6617952786921 44.6918600441328 47.6884372645373  
55.0767527801658

LOC728621 38.1169703906207 37.10170285405 37.2838080935695  
37.651298468202 39.5595233162192 40.9506062495231 40.0052661202207  
40.4359177791566 35.9645119596869 38.3092241935352 39.5399188536544  
35.8429598823818

LOC728626 40.0557788909923 39.9697332660833 36.6522278218553  
38.5252456306656 40.5710637884029 38.1169703906207 41.0381860307445  
32.4466419672036 43.4656637536244 36.4651112441576 41.9908237694988  
37.2810767789306

LOC728635 75.2923395421694 87.6763065012524 119.015431849218  
101.008449241109 60.1730663840476 86.3888090084564 97.8309399470621  
91.8568043052819 99.5192591352063 84.4596873416863 83.6898920876764  
85.5570725984366

LOC728636 39.266565827316 35.1224289925572 36.178547300352  
32.7960913111995 36.3390947880186 36.1190722948669 33.8558232866797  
34.9580369221164 34.2973261206803 36.6893251782922 39.7342718293432  
40.1700117452801

LOC728637 42.5193208629123 38.4330755397458 44.6032218589199  
39.7411455670172 43.5544347011646 42.357910063876 51.7714254834195  
41.4508241771315 43.2761454096265 40.1179210534118 38.6662194645633  
40.5703581862752

LOC728643 141.364814429951 140.732068737192 115.10044062133  
79.1000897258245 187.430528830941 206.899594905509 123.455270940015  
174.416924448198 198.103081445734 93.0626550693989 176.866350130563  
286.879774045206

LOC728653 49.1868644496737 60.8608693323868 62.9313387640547  
166.983092667334 54.4586176399381 62.4450952595811 62.3556396662215  
96.5813769696577 38.2215591930186 91.8251275769679 102.77259665192  
59.9326265577462

LOC728654 42.442231667357 41.159706131351 40.5734458834617  
42.6913548400127 43.3332476888305 41.8613406887824 41.3594868055879  
41.8417024632349 46.9739160257217 41.2276963324981 44.1148826235374  
43.6753843488695

LOC728656 40.4639532172338 37.5469247328848 39.8299340037009  
39.2780515621926 37.4470183315826 41.9543948167375 39.1539892144371  
39.7509165247419 45.5779686360641 45.9004543328976 40.0766543123257  
42.357910063876

LOC728660 36.5393857306744 41.4508241771315 40.0998167098057  
40.3180310664156 40.6723334103791 38.5252456306656 49.1067959632109

40.931294690669 43.2761454096265 54.1683282066029 42.8263096141654  
42.1537476443423  
LOC728670 45.9090659324223 44.0409178714232 39.991353369336  
43.4410741327254 43.6587492470348 42.2577689927563 50.3519150282938  
48.3590401011623 39.6609238036815 40.5090849993014 39.3667161654772  
45.6692241948108  
LOC728689 55.9563971339766 52.7948184519106 59.4431489877328  
49.6479308322777 84.047148416454 60.1042270393382 58.0969258817391  
56.1106697476264 53.1249776278067 59.8130420783374 60.0105984819248  
56.7711602236706  
LOC728709 43.844855336215 40.5400384479766 47.0055981216687  
44.1483976313959 41.8806343997257 35.6125439901743 46.7100796279384  
44.0390019242862 42.992884918158 41.9666541498638 44.8872784170036  
42.1537476443423  
LOC728715 73.9986015964321 209.31241212773 192.112101000423  
95.6215575902122 129.820909990346 64.0985088513857 107.466490458133  
117.074650076861 117.732966326465 111.877209777434 74.1425714439424  
92.1646038105091  
LOC728723 41.7397731376692 44.5884811528117 39.7411455670172  
47.2009420656854 44.5668141895992 49.9699131196797 40.9157352260901  
43.1567024035183 45.4799270968969 44.1379638573455 43.7585538437696  
38.2350720635382  
LOC728729 36.9060997041453 40.716553247236 37.7384958256497  
37.8442841690502 39.1650142708257 35.6125439901743 34.806104801006  
35.1738399826814 37.5469247328848 34.9138625012006 35.046946054314  
35.4484652445078  
LOC728734 115.40235710164 92.4449920876332 87.7253906521723  
89.1910625491447 96.1825551158198 159.324902145777 80.882176929636  
116.927619635255 73.1841981188179 97.9806802695685 99.8754776648876  
85.2893380711323  
LOC728739 121.449647909665 157.906415100288 153.364107550338  
91.5202521578181 117.033529761587 143.607457611143 135.592113666246  
72.692416146584 134.646159826262 82.3488166506716 101.28981910937  
110.947379383048  
LOC728744 44.7044140979108 34.6306468196142 35.0970060242246  
42.5664883002833 43.1252272136667 45.2852528185486 50.2016912396771  
46.3685439301234 38.3418933808844 41.2276963324981 36.5359455830388  
41.6550823405646  
LOC728747 42.8036731479932 44.1239711172417 43.7630587657205  
43.074472921841 42.7982502551634 42.0574848021044 37.0564573649223  
44.6107027295193 38.8271346375425 43.4885245598939 43.844855336215  
42.7782216342806  
LOC728758 51.8781065691038 63.6966761077037 55.5567699051046  
57.8277957325085 52.2089306840125 52.2089306840125 62.3556396662215  
48.9826868640753 48.7358147030082 64.8549209064366 51.6414075056938  
55.0767527801658  
LOC728760 41.2424637338424 43.683792219729 43.2721716572958  
43.4812166409346 40.4639532172338 43.7078399718247 42.9803717121865  
40.8833572570383 37.3043739460234 39.0266821712099 39.4410515050885  
40.3316153483289  
LOC728763 37.3463875295726 35.2143190355414 40.931294690669  
32.1218888714537 32.5318884330468 38.5252456306656 37.830876898596  
40.047314525032 35.9645119596869 35.8304004211528 37.3687900733549  
45.3763275588341

LOC728765 39.5676051939342 43.8495248991589 40.4070046183108  
44.9370339275041 41.5668884168669 40.3357777530419 40.9157352260901  
42.6450179841129 40.137818555383 38.6454098044474 43.0016969050339  
41.0657892043496

LOC728772 46.5549623118323 49.5692646717944 48.055683217958  
51.949834638817 44.2607789091176 51.2405397507224 47.5963750520409  
45.8095171770165 46.581796165231 50.7390160399184 47.2134341420411  
45.134793898089

LOC728789 42.0532901689036 41.159706131351 40.4882741869718  
42.357910063876 44.147557390293 40.650742261428 42.4939802311136  
40.5158867964016 40.7847110517594 41.6373771565199 40.0766543123257  
42.1537476443423

LOC728799 42.7150227340364 43.4396866157171 38.4043916290561  
39.3750969348308 45.3675390992851 37.2686490268265 44.8643898647322  
36.6452480995946 45.6582729799009 45.5776159432079 43.6629145624937  
47.3172462673426

LOC728811 56.8168526942685 86.4898752526885 104.557637353314  
41.1886975241176 81.1214257028304 51.702461863489 180.717886605217  
57.037639245179 117.678385591938 69.9928775398776 69.8899273527731  
99.9685666586407

LOC728825 47.9175508887533 56.6927078228789 64.9072331703985  
58.0218262176065 62.1836961153924 60.7488007939604 51.5967098638347  
44.0390019242862 65.564930068976 48.0211752672327 48.5292718280498  
74.3442318693865

LOC728832 38.0648056183784 39.5050383901884 38.941855825269  
36.4098694708483 40.9950639693255 40.9506062495231 35.8227939208521  
37.86982638952 37.5469247328848 37.4642807402741 40.040778349137  
38.5921548841176

LOC728844 39.8662795144616 46.5650556481721 45.310660704531  
35.7674462337723 43.1252272136667 36.9060997041453 45.4799270968969  
47.0940613507321 48.4869909888679 41.7405682794166 45.0589947942306  
36.3454320848591

LOC728863 49.085741080241 41.4508241771315 38.2280071951674  
43.074472921841 42.1650127805175 40.5281496800812 36.3194282084339  
39.0620487644635 38.9006788676407 39.7835513496873 39.9899430628542  
45.5800840647989

LOC728876 36.5393857306744 43.0971787292711 36.3604951341921  
42.9358255168086 43.1252272136667 40.9506062495231 43.8206425661746  
42.7431359850339 36.9060997041453 40.1179210534118 43.1931731665131  
34.806104801006

LOC728888 1273.52492984569 1347.15664445545 2018.28984520892  
1310.03307063841 1679.12630849964 1139.81870068001 803.548811322583  
1698.18614771363 723.531909526537 1780.14552702126 1457.72260892651  
938.802606388076

LOC728895 42.1537476443423 45.2556760873335 49.2041300973417  
37.29566077996 43.5544347011646 42.4580504587581 41.253645578517  
54.6067620335514 39.4762546236449 40.6022003765153 42.8263096141654  
44.9070250604284

LOC728904 38.5648843914189 40.716553247236 39.2707964550441  
36.9912468186322 37.6527901109005 40.8634043028528 40.5585676679482  
38.1835938174625 38.9006788676407 39.3698811593364 37.1059647239814  
38.1421709520616

LOC728910 44.436995101921 47.8400694856726 58.2986825661503  
70.2541961995753 39.6535880152834 47.6803619768589 46.7100796279384



133.453860783605 52.0583273941813 50.1649089793069 49.319499137678  
42.7782216342806  
LOC728912 41.4508241771315 42.0500582486532 42.108130037421  
37.9230440150891 41.3387790895716 40.209110303983 42.3194600586894  
39.3709357615493 43.4656637536244 45.1569741609597 43.0016969050339  
40.9149601380325  
LOC728919 44.1294459089314 41.4223563635976 38.4043916290561  
43.9282059368202 46.9906120932727 41.408887993053 44.3440839686558  
40.3691324547049 41.7233690251839 40.4518431978241 36.368850660757  
40.4639532172338  
LOC728929 41.0608773166058 45.4143854024453 48.8100349749783  
40.0698728584484 44.7829632472754 39.2985791324641 46.0228732507872  
40.6171774724171 42.992884918158 41.4397539024976 43.7585538437696  
43.4709415392696  
LOC728936 43.0001432913058 45.4143854024453 37.0642268327439  
41.4273122914951 46.7508829977587 47.2009420656854 39.8695929627783  
46.1673159982664 45.8325181856483 47.3791873993182 47.9942520395434  
44.2527566343661  
LOC728939 41.8409927585705 47.6914221838216 46.2625470410195  
42.5664883002833 44.0451487108213 43.4681646416585 45.3597029614942  
41.7419877611072 42.0621425894624 40.4136535208406 47.299647867533  
42.8864415494484  
LOC728944 79.8196996067124 99.3344676796884 140.504336039225  
60.7148442408147 75.5034623354897 78.8595005348182 80.9514944341907  
77.2574232652488 92.8206287414481 90.5216273844682 83.2925226467532  
98.4699679900651  
LOC728946 39.6292788039793 41.6069493017095 43.6670755115848  
39.0156305603334 42.6022652963326 40.7063426028871 42.4493032770053  
40.188873541274 44.8997235283254 41.2276963324981 39.4410515050885  
41.0657892043496  
LOC728951 43.632365631458 40.7952353240579 48.6037684272115  
43.9744941494111 44.9384441371181 45.0882356578404 46.3611042575528  
41.5934628038429 43.7630587657205 46.614092935749 42.9634662926872  
42.57175366709  
LOC728956 37.0320432433314 39.5050383901884 42.5406888281114  
41.5464765641928 42.4864576619427 45.9266745571724 37.9430145836712  
43.6434576713809 41.9635525160083 43.9450023643394 42.7275315121163  
43.6753843488695  
LOC728973 281.452208033175 235.33716196909 189.398959817735  
273.849703944739 289.843931942051 354.973265582488 198.010793115588  
308.728126648231 230.09336914921 254.920345078558 271.50380898418  
366.716775127375  
LOC728990 41.0608773166058 41.0678614026819 44.7829632472754  
44.7980740332174 45.8051846088552 43.1826328292558 44.3440839686558  
43.1567024035183 49.0986627051784 43.1839109702714 39.9899430628542  
41.0657892043496  
LOC729003 45.9090659324223 41.6466169548846 39.2707964550441  
34.5425384901279 37.6527901109005 32.9046688061235 35.7055410599146  
35.9023742468744 36.5393857306744 32.6203270051744 37.2892641289258  
37.4554876386402  
LOC729008 46.3390850717989 50.6229884142872 47.2055133646385  
75.2475238554276 66.1650385535549 53.2046867327331 45.4799270968969  
56.0496524902806 52.1788489555942 63.3872214856708 50.7903824729818  
86.9924799927707

LOC729012 36.2496364442264 38.8336427948187 40.931294690669  
39.9697332660833 46.0977687311222 39.6251842352088 43.5627649099623  
42.6450179841129 39.5806465938526 42.2614524730856 39.9899430628542  
37.4554876386402

LOC729021 144.266359480086 98.9017950719795 144.858109227889  
244.070778149931 128.146059846414 54.9108046955355 108.558977253184  
100.499763255098 85.0162042963215 116.76301232629 101.699631771662  
78.2644076847509

LOC729025 45.4799270968969 41.2598458726002 43.1931731665131  
46.0228732507872 49.9493230064613 40.8634043028528 43.4544762830742  
42.5435283762933 46.4164127487052 41.6373771565199 38.2795150354677  
47.2131144508464

LOC729034 40.4639532172338 37.2810767789306 39.0775870687758  
39.853175885492 40.5710637884029 47.3791873993182 38.0598374201407  
40.5158867964016 37.7384958256497 39.5637454855233 41.4508241771315  
42.4607795638552

LOC729047 34.9138625012006 36.9994058279362 38.4043916290561  
39.2780515621926 45.3675390992851 48.7781962164988 35.3362091871364  
37.7612949798895 40.0403898620771 42.8936990772838 36.2435874904689  
38.745552403895

LOC729085 37.2474303302343 42.1607322031054 48.3847843498476  
38.9534635879195 47.5647821785529 48.0350549043063 44.0687697278114  
36.9355798143571 39.3750969348308 40.8970401536578 43.0016969050339  
44.0451487108213

LOC729096 41.2424637338424 47.765848710116 43.0016969050339  
44.1483976313959 36.7356360093603 39.3841861812262 45.7452456977857  
36.7460922671619 44.2607789091176 49.4006068471301 44.8872784170036  
41.3481355128089

LOC729101 70.606558064758 105.257627491307 107.637618676176  
105.790224260281 107.54932544455 72.2544131004774 97.1759226403408  
116.275899706695 79.7061415085215 74.5694657001572 81.8648220673828  
76.4580830432622

LOC729137 45.1912496459517 139.999709303614 42.8270038153139  
41.8778873678551 68.9766943946607 50.6360662655392 39.0458123429605  
96.5813769696577 61.1560835966725 49.1928206164702 37.9946685306274  
90.4160198134865

LOC729148 333.566613571224 351.700618429121 298.031228833741  
550.642253702646 169.920726825854 338.846080983216 286.291779906932  
251.65044168003 241.599353653369 315.487514440864 324.767804809056  
394.990145259101

LOC729162 50.8388984085636 47.3536182445315 44.2405728317107  
44.4367387274922 49.32293280121 47.0940613507321 43.1931731665131  
45.0972184964705 48.5792058061372 48.7414853386615 45.0589947942306  
49.4786466722535

LOC729164 39.7576136507593 42.4493032770053 38.7745734037492  
39.3750969348308 37.0526522140242 42.157627240486 45.1017494688414  
35.6825474397235 37.3600014814388 46.2286164776607 43.3085358214154  
36.064718696392

LOC729175 37.4554876386402 44.2105195734073 40.931294690669  
43.4410741327254 43.004943518025 39.7394181011603 36.9355798143571  
45.642304356051 39.5806465938526 39.5637454855233 44.3763859390287  
40.7704587752083

LOC729185 40.148780650831 43.4396866157171 38.8775560911841  
46.1673159982664 41.6806984441849 39.6251842352088 39.8695929627783

33.7818132446042 39.5806465938526 38.1042454705119 40.3452320167286  
40.0557788909923  
LOC729193 39.0620487644635 36.8278857504091 38.2640747683984  
40.3180310664156 39.7148429644689 42.911855821602 40.5585676679482  
37.1754071907165 36.7267557061938 39.6137246345257 38.6348619337445  
38.0972090128804  
LOC729196 45.1912496459517 66.4300949831964 58.8188963227059  
44.4367387274922 47.9128504683618 43.2805590023412 47.5963750520409  
46.7980335276155 72.4220552950926 45.3530683538086 46.4753015651202  
47.2131144508464  
LOC729197 40.6559419616644 36.4002279956519 44.8872784170036  
39.1706564265495 41.467005949568 43.9724628401189 44.2166118829877  
34.806104801006 45.9227107476843 40.8049408996274 43.0971787292711  
45.0985088502363  
LOC729218 38.7537364570873 41.159706131351 35.2838283525874  
42.6913548400127 41.1868052124344 37.5887129572848 46.1634822993009  
44.9977782988116 41.1742244762318 35.93950183586 36.2435874904689  
33.6902293666089  
LOC729238 41.7397731376692 40.5400384479766 40.4070046183108  
41.3027031037343 39.1650142708257 39.2985791324641 45.223075311113  
47.0940613507321 43.8482802038826 41.8613406887824 46.7386599624801  
38.9496515344837  
LOC729249 46.263826584899 42.7775752471711 38.8775560911841  
37.1894304543751 40.3452320167286 36.9060997041453 35.8227939208521  
41.3506832276112 39.9444191873552 47.4767851750188 40.723990462047  
41.3481355128089  
LOC729252 73.6362523983338 55.2182004838121 68.4720753153522  
44.265834798964 41.6806984441849 48.9826868640753 42.1607322031054  
59.1107691694766 55.5086026637973 45.0155543555707 44.2142581488029  
43.5738557773903  
LOC729254 39.9697332660833 39.2907645923217 40.6737160001291  
45.7397504535169 44.2607789091176 41.2567470068038 43.9450023643394  
45.7476095696859 40.7847110517594 39.5637454855233 46.1673159982664  
44.9070250604284  
LOC729260 46.9939712192224 41.3610369241157 39.8299340037009  
53.593974682612 40.9950639693255 41.4508241771315 47.1345949868029  
41.9315419791594 44.8997235283254 46.8954576545929 40.1742127891824  
39.7411455670172  
LOC729264 33.910180124771 38.861780967827 38.5045333213784  
39.5050383901884 38.9919142475596 37.7000400506818 41.0871827071116  
58.7460488758053 42.4784375889044 45.5776159432079 45.447310733898  
45.5800840647989  
LOC729266 42.3433931248155 41.9894412416874 40.931294690669  
40.9607305725196 37.0526522140242 34.9849896310235 40.2154497375715  
39.3709357615493 38.4344387289956 49.8393069675192 39.6403089864678  
40.0557788909923  
LOC729269 32.6285977114039 47.4076235350059 46.1653991089885  
38.8495095797881 38.8456942580061 44.6524308640784 41.3594868055879  
41.7419877611072 42.5406888281114 37.920964499903 38.745552403895  
37.7526485343328  
LOC729310 47.2862299990938 46.29198852834 50.2869791217819  
46.3203995372658 39.9697332660833 39.4953494583071 39.8695929627783  
39.2672712041774 41.863927676552 45.9004543328976 41.9908237694988  
45.0985088502363

LOC729317 333.566613571224 365.860501246879 465.595459259015  
323.295794446334 290.087040648659 530.314249832491 377.315812006339  
207.215265436327 705.283979182062 331.173265739654 306.174148874454  
553.517839467557

LOC729335 44.2350046179299 47.6914221838216 44.4311655729487  
42.357910063876 38.0598374201407 43.9724628401189 43.9450023643394  
44.8997235283254 44.2607789091176 47.4767851750188 44.7114813656401  
40.9683275553869

LOC729351 40.148780650831 34.8137085420423 39.0775870687758  
38.745552403895 40.2449343247539 42.2577689927563 60.0981687048269  
42.4580504587581 44.619512785899 35.93950183586 43.5710871617107  
40.2669497398702

LOC729355 41.1523487516364 46.8954576545929 46.6588655218735  
40.8681871019812 42.3685136297603 42.5660695551615 41.5817737564592  
42.0494116081998 42.8036731479932 47.1001757441025 41.4508241771315  
45.0035308952466

LOC729370 39.7576136507593 45.9266745571724 48.7039705048129  
43.8002456102021 36.8059561571675 45.6129956328415 45.1017494688414  
39.5466975353131 46.4164127487052 44.2580151149956 43.7585538437696  
43.4709415392696

LOC729373 39.8662795144616 45.0905928998779 40.8420925848403  
42.1273928203021 39.6535880152834 41.554942319225 46.7100796279384  
41.6466169548846 49.0986627051784 40.3235655331796 37.4642807402741  
42.4607795638552

LOC729378 34.5886782974123 42.4493032770053 35.5220586859301  
43.074472921841 41.3755760434934 40.040778349137 38.4005795891396  
61.8665316900291 37.2810767789306 43.1839109702714 39.6403089864678  
43.3744503319109

LOC729393 51.1740855632044 42.0709558258414 47.4740726032707  
41.6564075217517 49.32293280121 45.1873487463472 57.6643188499117  
47.9942520395434 47.9035532886869 44.1379638573455 47.0940613507321  
45.5800840647989

LOC729396 39.0620487644635 36.6968906669565 39.4710743516517  
36.4564050256915 39.6535880152834 37.0180934800573 35.0305278582179  
39.1652965788406 39.3750969348308 39.2623423164488 35.7953070087288  
35.9604262434141

LOC729399 39.9182914210537 40.0145811166794 42.0621425894624  
38.8495095797881 36.8442943492616 46.852437033077 38.3346870469391  
43.3838505886856 34.1686574241133 49.2317401696588 45.5707650534259  
48.9733758107788

LOC729408 42.2455707947223 43.5873188565519 39.0775870687758  
41.8778873678551 49.1928206164702 43.1826328292558 49.6872467499977  
40.2382908228517 45.1899271235974 43.7303813515864 44.3763859390287  
37.9607839934735

LOC729444 41.3848620620968 40.7616966228404 42.3536549114165  
40.3589492801501 42.2510526338368 42.5660695551615 40.6130792100165  
37.9837233601316 38.401850731664 41.0650982158952 42.1550412794904  
40.3330033416496

LOC729446 96.4971762611189 90.8550873130713 75.3580625318157  
72.0112676564347 56.4685270445642 77.6574950328663 79.9971782971285  
73.9624143741222 88.6717761948382 122.924027019519 104.754762973117  
79.3875629814087

LOC729466 5895.03230740197 5601.18872540083 3575.78813099057  
4458.76622334251 4569.48246031279 4458.76622334251 7393.77508374057

5246.60459228386 5776.17749026501 3869.93390477952 4128.92158369026  
4948.93803183911  
LOC729476 41.9407041937973 40.8880530359822 39.8299340037009  
39.5050383901884 37.5556299264699 39.9397419279057 38.2933870238743  
34.4896350146096 36.7267557061938 38.6454098044474 30.7315474127249  
35.8429598823818  
LOC729485 42.2455707947223 44.1239711172417 46.8267540220952  
46.614092935749 45.9104478407175 45.6129956328415 52.561573697155  
37.6557714476853 48.5792058061372 49.4006068471301 41.2598458726002  
45.7562276914441  
LOC729486 46.3390850717989 55.8678615468603 52.5353664902258  
43.4410741327254 45.2556760873335 43.1180113655693 44.4045701012801  
82.0102749744973 53.5224822626949 72.0443425395404 64.5722284870633  
67.6138276415458  
LOC729487 42.2455707947223 36.7976562409506 41.6977706798234  
47.481302504066 43.6587492470348 49.5424425850549 44.3440839686558  
45.642304356051 42.5406888281114 46.6598879466655 40.547835538778  
39.8497227447888  
LOC729533 38.5648843914189 41.3610369241157 37.1643693306382  
39.9697332660833 33.3231576795423 41.9543948167375 32.6530576979948  
41.9315419791594 39.4762546236449 36.0481934423077 32.2133093774284  
34.0382693188794  
LOC729558 42.0532901689036 44.8529259387308 45.3974838013476  
45.334106390212 41.5668884168669 45.9266745571724 40.1235656101329  
44.9977782988116 42.0621425894624 40.1179210534118 41.7272875295469  
44.1452943804044  
LOC729559 83.2737524877952 167.896094603299 144.657263336504  
74.0093517743852 150.778095336356 100.962000280931 68.4380822448123  
80.3860547572521 94.8408264309872 130.477142940837 129.236597599908  
119.355990535521  
LOC729569 38.2083710281545 36.9994058279362 34.3633615460307  
43.6726153508978 34.9062568194127 39.9397419279057 43.8206425661746  
36.3405039629059 39.4762546236449 45.5776159432079 35.3362091871364  
39.1553169409075  
LOC729601 40.3478825593224 39.3999056968598 44.0451487108213  
45.334106390212 48.5000946421718 37.9003288112261 45.3597029614942  
45.7476095696859 44.5303781239209 40.8970401536578 44.3763859390287  
40.6614700944853  
LOC729602 52.0299937917925 45.3486182278177 65.0359415104302  
66.0397471691747 49.32293280121 52.4351670989268 57.51482768194  
46.5717043290731 43.7630587657205 76.3583555666815 79.7691160370015  
69.51607174053  
LOC729603 7235.0789252269 3329.68037676265 4632.08655821299  
4820.70258471362 3253.86278287661 2178.59848996529 5932.92478996609  
7627.46814033012 3854.42494497831 6309.53691418065 5932.92478996609  
4752.94498024732  
LOC729639 34.4896350146096 42.3550738181144 36.6522278218553  
40.7481155008596 40.9950639693255 45.6129956328415 42.0605906240248  
36.6452480995946 39.1790517315259 39.9948390976317 38.6662194645633  
39.4490233720848  
LOC729647 47.2862299990938 44.2630383225933 48.8100349749783  
44.6905691366696 52.0583273941813 47.9503724044453 49.1067959632109  
52.3068458655445 49.1940901905636 56.9463858443402 57.7786197537899  
47.2131144508464

LOC729675 39.266565827316 41.3610369241157 42.157627240486  
41.8778873678551 46.4343327861696 42.9695585740813 40.6750540874299  
40.5158867964016 38.9834959368496 43.0919221375514 37.5583886316038  
39.7411455670172

LOC729692 44.6231541342 45.7979032939211 48.2883694323339  
47.6687908290818 53.9074374788981 50.6360662655392 49.2546642180676  
50.7364620410977 48.0163377492228 47.3791873993182 47.299647867533  
44.3521099857368

LOC729715 47.6397712007919 45.8669209716694 43.401782064778  
47.9915414951747 46.7508829977587 43.6670755115848 40.9157352260901  
44.4031868028216 40.9901805728485 43.7303813515864 47.2134341420411  
40.2669497398702

LOC729732 43.9309845324767 48.8584917918986 42.640829914102  
47.481302504066 56.0477607422828 48.0350549043063 43.9450023643394  
51.6660481331154 41.3803269429468 44.8997235283254 53.9517841438975  
47.3992733452821

LOC729744 44.0566054055178 43.6601381712644 42.381482941987  
46.4555908533915 45.3675390992851 41.2040352443154 42.442231667357  
46.5717043290731 44.5766390180978 42.0217776707284 42.668311948721  
40.7063426028871

LOC729751 45.9090659324223 42.466333667839 41.0356368374708  
39.9697332660833 41.6340461942423 40.8970401536578 41.7614975630362  
38.7119440509409 40.1738310955128 37.8592299544905 40.4094901248527  
40.4639532172338

LOC729754 35.1307934330047 41.4508241771315 40.0998167098057  
42.6913548400127 39.2608760193011 42.5660695551615 47.5963750520409  
39.853866204927 39.1790517315259 40.1179210534118 44.1148826235374  
40.9683275553869

LOC729758 41.7397731376692 39.6995529770239 43.1931731665131  
37.9875302985336 38.0598374201407 40.650742261428 40.7910160811527  
40.931294690669 44.4395580493118 39.0648733099061 39.7342718293432  
42.57175366709

LOC729759 39.9697332660833 39.7835513496873 43.0971787292711  
48.9944486068347 39.9697332660833 36.3845892764084 43.4544762830742  
45.8669209716694 40.5912213523345 37.7315666632629 45.9104478407175  
45.0985088502363

LOC729764 92.6545309624315 49.7363778831003 49.8344973836834  
56.2508140932179 52.0583273941813 66.4015820814547 52.2476631126873  
61.016921238986 58.4891791448514 73.1407519625966 73.9126724639466  
73.6512983066046

LOC729766 40.7609952437622 37.3634897565502 36.769073068743  
36.7892997857376 45.2556760873335 38.6414316877471 40.3302268293707  
44.7044140979108 43.1805016690297 43.0919221375514 42.7275315121163  
37.3600014814388

LOC729776 113.113062709739 71.0340758556049 96.577572948724  
145.267770598988 124.791747507205 129.675613712326 118.483499958227  
100.234661597218 103.264100180823 116.576093937704 117.8523906126  
128.098188757701

LOC729777 37.3463875295726 35.9305494063137 37.5597671487621  
35.6027791404152 38.1644569189523 35.4142595025086 36.634024014558  
42.7431359850339 36.5393857306744 40.3235655331796 40.723990462047  
36.5474283500601

LOC729786 43.5710871617107 38.3322849790657 40.1985790927248  
37.651298468202 38.6454098044474 37.9003288112261 38.5066108855005

36.3405039629059 41.9635525160083 37.3179578037963 42.5426057453993  
39.2469742642337  
LOC729792 46.8954576545929 39.3999056968598 41.6079958749402  
44.9370339275041 53.0419743379342 46.4648868771662 43.6753843488695  
42.157627240486 43.9450023643394 40.8049408996274 42.0750889188255  
50.4847465816184  
LOC729826 44.9896851005259 42.5660695551615 46.02045129728  
43.0016969050339 48.8381507187986 43.4681646416585 53.9383247100435  
41.2884376047238 49.1399035787209 43.9783383422823 43.6629145624937  
43.3262148375525  
LOC729837 48.9906383294199 46.5650556481721 50.5089777244781  
44.4367387274922 45.3675390992851 45.1873487463472 37.830876898596  
45.8669209716694 47.3791873993182 43.2988017098387 41.9083581529276  
42.57175366709  
LOC729843 505.47283014577 490.301992866742 673.522667186915  
303.93332785291 403.92758879201 354.973265582488 358.194667053419  
619.337575854369 522.811631783729 751.953794043451 617.271611375695  
418.410951118141  
LOC729882 41.7397731376692 40.4359177791566 39.991353369336  
46.0228732507872 40.4639532172338 47.2927436772465 39.8695929627783  
42.4580504587581 48.2123120250343 42.5664883002833 44.0409178714232  
41.0657892043496  
LOC729900 39.4710743516517 38.1312950900467 41.1367478979484  
40.0698728584484 43.2484996523549 43.7630587657205 44.4639405506967  
38.956280281655 43.3744503319109 39.7835513496873 38.5668610487033  
37.1747156131306  
LOC729905 48.5835484742456 46.0713306971594 55.7764940944098  
43.8002456102021 56.8307116636372 51.1621379498014 40.7910160811527  
40.7311497914871 49.9951674107458 36.6893251782922 55.0404566626821  
43.4709415392696  
LOC729919 38.6454098044474 42.9358255168086 41.437237454134  
41.1886975241176 42.269054475455 38.4330755397458 42.357910063876  
38.956280281655 39.6609238036815 35.8304004211528 39.2542963855807  
43.3744503319109  
LOC729957 43.4626049853157 40.7952353240579 36.8730514568925  
34.7266486944713 40.2449343247539 38.3418933808844 38.941855825269  
38.956280281655 34.3842972343227 42.5664883002833 37.1059647239814  
35.1451084093692  
LOC729966 44.8914371498528 43.1805016690297 55.9459886217809  
43.1847628331565 56.0477607422828 48.5835484742456 44.7255207589606  
41.9315419791594 96.5175130622216 60.9905272201951 53.2083147523758  
86.6854406823303  
LOC729967 41.7397731376692 41.9894412416874 47.3861758958576  
37.9875302985336 48.3814421939888 38.8336427948187 39.6535880152834  
39.5466975353131 45.6582729799009 40.8970401536578 45.1432412071268  
48.6037684272115  
LOC729973 44.436995101921 41.159706131351 39.7411455670172  
43.5627649099623 41.0885562160946 42.157627240486 39.0458123429605  
46.2779564481158 41.7627910693483 42.3606390470387 37.9230440150891  
41.6550823405646  
LOC729985 62.7669079605627 64.408176016319 61.2153068100932  
54.8412943008635 60.6400800519777 85.6038071277319 71.6890300780549  
94.6432868887401 59.7483827511172 62.3233491851723 81.9218437790485  
68.0751111916102

LOC730012 43.5710871617107 38.8336427948187 43.0971787292711  
40.1804147506786 39.0564222526273 42.750861693377 54.6414321010929  
49.6203214143464 47.9035532886869 41.8613406887824 38.4689132737495  
42.8864415494484

LOC730015 34.0467249875782 41.554942319225 38.3166554965434  
42.357910063876 40.9950639693255 42.0574848021044 34.3633615460307  
42.357910063876 39.1790517315259 43.7303813515864 38.8507804383261  
43.7672102682067

LOC730024 42.1537476443423 38.4330755397458 40.148780650831  
44.3440839686558 45.2556760873335 44.5099734963815 45.1694246393676  
63.8558858499025 45.0666179335087 46.1390887492649 43.8002456102021  
43.8575940017119

LOC730027 41.4508241771315 37.920964499903 41.9666541498638  
34.3595588146954 40.2449343247539 37.8102105794655 39.4600924554505  
39.7509165247419 38.7298222155532 33.2987269789328 42.6366765186182  
39.0536056496869

LOC730031 46.5549623118323 42.8542642792862 50.2869791217819  
48.4916117779992 46.1804647841331 42.750861693377 46.0228732507872  
46.695848687694 44.3440839686558 43.1839109702714 46.4205654140754  
45.4799270968969

LOC730034 38.7537364570873 41.6466169548846 39.4710743516517  
40.5484717678957 45.4751076037511 37.9003288112261 40.3302268293707  
47.6952179922944 43.0930293831497 42.6793753550854 42.911855821602  
45.7562276914441

LOC730049 35.2267149016596 34.3715326040967 35.8265993915844  
36.3604951341921 37.8679241954337 38.6414316877471 42.357910063876  
34.3865306339645 37.3600014814388 33.8984830800739 34.8383995317036  
37.2810767789306

LOC730050 49.540449125788 42.0709558258414 40.1985790927248  
43.4410741327254 43.6587492470348 50.4022543872993 47.1345949868029  
45.3872406432794 41.863927676552 43.2988017098387 52.1788489555942  
49.4786466722535

LOC730051 43.844855336215 99.3596089438084 52.6275131390249  
67.1961800572759 127.547251770359 98.2843999216669 45.4799270968969  
51.7538628098347 66.4251023257203 65.3377940117969 59.8070012006708  
79.8331445290301

LOC730063 42.2455707947223 62.1642339365777 57.8111054584154  
51.7739270955254 69.6330393135101 73.1169003714219 84.0691608193405  
58.0892402609917 58.6431245059655 46.7646877499666 55.1099824417989  
58.2251348002272

LOC730076 35.4287975493553 44.5152708955623 42.7303139017786  
34.8137085420423 37.7576900881741 42.157627240486 55.2088411137193  
39.9576138799997 38.5252456306656 39.7835513496873 39.9070785037411  
37.6557714476853

LOC730077 42.2455707947223 48.5905518770847 43.3085358214154  
47.0874209746031 70.5676924620725 55.1037284831588 43.3262148375525  
43.844855336215 50.5785738734431 45.6868589181768 55.4694986901287  
51.0013344286851

LOC730083 37.3463875295726 49.3581578587582 51.3268475761593  
43.5627649099623 47.2074332636566 45.8325181856483 42.9803717121865  
40.047314525032 50.3245489035833 49.3000844711116 38.3684202018524  
49.7336769474446

LOC730092 46.4732328055735 48.0747155717649 43.0016969050339  
56.7927450229377 48.1473938886239 48.4166623125005 45.5629520869561



43.9366081640576 51.0492389286271 60.8250302910721 52.3187919317561  
52.7847097260565  
LOC730099 32.0823591288671 40.148780650831 36.8730514568925  
36.7892997857376 38.6454098044474 36.4986986135769 44.9863726205428  
41.0381860307445 35.4332080966594 36.4651112441576 39.9899430628542  
31.7413650507468  
LOC730109 44.436995101921 44.4411734611229 43.0602678767669  
43.9282059368202 44.6202070855297 45.4882438975269 43.9450023643394  
42.4926864381766 44.293922970134 44.0719548209593 45.0017158586743  
41.9430737035925  
LOC730118 44.9896851005259 40.4359177791566 37.2838080935695  
43.8002456102021 36.4434672195785 39.9397419279057 39.5496902678788  
42.157627240486 41.3803269429468 46.8954576545929 42.8263096141654  
43.7672102682067  
LOC730130 41.5421429082231 37.5469247328848 44.5134109184888  
40.1804147506786 39.1650142708257 47.0940613507321 40.4359177791566  
37.86982638952 38.6322728994674 41.6373771565199 43.401782064778  
36.8690774823319  
LOC730132 45.7356815244513 38.5252456306656 42.157627240486  
41.5464765641928 42.0709558258414 41.7627910693483 49.1067959632109  
40.831207953647 41.074824727477 43.2988017098387 44.0409178714232  
43.2776458914333  
LOC730145 47.4678477186801 36.1232327599945 41.0356368374708  
38.0958223740111 39.1650142708257 38.8336427948187 36.197424053556  
39.853866204927 37.9273653326866 46.2286164776607 37.8372168909583  
43.0930293831497  
LOC730184 46.8954576545929 41.9894412416874 46.0727230219512  
48.856176220627 47.2074332636566 44.2607789091176 47.8947595316832  
47.2864663693787 48.9931786790166 50.4234835272833 44.2925355984056  
49.904979214379  
LOC730194 40.6559419616644 39.0102066700839 41.6079958749402  
36.890925044696 42.7982502551634 37.3799542961839 47.2927436772465  
47.9942520395434 37.4540772310118 37.2089297656361 41.2598458726002  
43.9541718254769  
LOC730196 42.1537476443423 40.2493681589104 45.6989664108554  
47.8164193292842 43.3332476888305 44.7804080899431 41.4742337714895  
41.3506832276112 45.1899271235974 41.9666541498638 41.3553369544097  
43.1805016690297  
LOC730226 40.5654775358427 46.4861258030402 45.4865173433646  
43.5627649099623 47.9128504683618 44.3648993568405 46.1634822993009  
45.4757965005055 46.1101825640108 50.8826620053386 45.6348103033479  
46.7182294568603  
LOC730240 46.8954576545929 47.8400694856726 43.7630587657205  
42.9358255168086 45.2556760873335 41.554942319225 46.4388841354122  
45.642304356051 49.7336769474446 41.5435611403119 40.723990462047  
47.0130468198828  
LOC730241 45.9090659324223 42.8542642792862 42.4580504587581  
42.9358255168086 38.9496515344837 44.4619248757502 40.6750540874299  
40.3357777530419 43.6670755115848 42.5664883002833 42.2618615571566  
44.6484005362281  
LOC730242 38.304249186058 45.2556760873335 40.7620472083159  
44.9370339275041 43.3332476888305 38.6414316877471 42.357910063876  
41.2551966132486 38.2215591930186 43.401782064778 37.7384958256497  
42.4607795638552

LOC730243 44.0328992213727 44.2630383225933 38.9790184198145  
46.7577982595088 42.4864576619427 42.0574848021044 36.7356360093603  
40.6171774724171 46.7760357462635 43.4885245598939 37.5583886316038  
45.0985088502363

LOC730249 47.1962846565261 44.9370339275041 48.1997158668729  
67.1961800572759 47.6884372645373 42.0574848021044 45.4799270968969  
39.7509165247419 42.5406888281114 44.4652605017595 45.4799270968969  
46.917149434588

LOC730256 82.0292880742189 185.165420581989 199.264520680174  
119.591054636527 185.378190201718 133.610670717456 207.957319374194  
81.0331497830643 179.07886477603 103.808640431626 106.985301705486  
100.756165194192

LOC730262 46.0023068797812 41.5132248356707 42.8723769353017  
39.4569929845912 38.3085139808968 40.5805725503899 45.4164642922183  
37.33030683349 45.0997987980157 39.6719190054379 41.3553369544097  
41.7575097298927

LOC730272 36.8072833828297 35.6434124419782 42.2577689927563  
40.8681871019812 41.1868052124344 39.4953494583071 40.9157352260901  
43.4544762830742 40.5912213523345 36.3612409063792 41.7272875295469  
43.3744503319109

LOC730273 67.6767845246581 62.4530276414691 71.2246788429078  
69.3525901554637 62.8270556619309 61.1022920882065 47.2927436772465  
57.7805922926828 52.2631308081333 113.26670675749 76.0420039542595  
57.8111054584154

LOC730274 43.844855336215 43.9421822132391 43.401782064778  
39.3750969348308 41.6806984441849 41.8613406887824 34.6720534245631  
43.2551508830106 39.7537274655115 46.6598879466655 45.2265319826548  
42.57175366709

LOC730302 36.5393857306744 42.9358255168086 41.8751578329365  
41.5464765641928 43.6587492470348 46.574682061365 43.4544762830742  
42.5435283762933 48.3954967265007 42.5664883002833 44.7114813656401  
42.7782216342806

LOC730316 656.355333007615 781.223434214089 702.737741114234  
416.844848063269 1174.92419086759 440.282299601096 669.776067547468  
718.832367050609 863.082385199922 982.428740433235 985.328482076985  
721.887210480162

LOC730340 45.1912496459517 42.0709558258414 43.0016969050339  
53.593974682612 42.0709558258414 38.5252456306656 35.4623691645629  
44.1311654985682 43.9450023643394 44.571915452417 43.844855336215  
40.8681871019812

LOC730344 40.7609952437622 42.9358255168086 48.9944486068347  
51.3851157261451 41.2740822675592 40.650742261428 41.1507980856436  
39.1652965788406 42.6366765186182 41.9666541498638 45.2265319826548  
40.5703581862752

LOC730347 43.1131704517186 45.5707650534259 45.3675390992851  
41.3567204694281 41.8399989408616 43.1180113655693 40.6085376283663  
40.199270580064 44.0390019242862 40.3458948319669 41.9430737035925  
42.7275315121163

LOC730357 45.9090659324223 47.1332119496722 43.9450023643394  
47.481302504066 53.3086645804786 46.1513019317765 53.3111230705754  
50.3082459161777 51.6731332961917 47.1001757441025 44.7926323492519  
44.5432192783161

LOC730358 67.9531693869426 82.6602736441839 95.2915739972533  
76.2591822114739 73.8251606025227 88.6287852712744 68.1125016199524

65.5820437889838 69.0037087543684 61.8529316708431 73.3321469094819  
90.9361642101537  
LOC730360 46.441301934328 47.6229101519945 49.2041300973417  
41.0726336841311 38.9496515344837 45.1873487463472 43.8206425661746  
44.7044140979108 39.7537274655115 39.4710743516517 35.4386677371439  
42.8864415494484  
LOC730411 44.5282181324797 38.1312950900467 40.0998167098057  
37.7469621225553 42.4864576619427 45.7300501624017 41.5817737564592  
32.8834169462007 38.3418933808844 41.7405682794166 42.170702295259  
47.6040671292013  
LOC730412 34.1336988442837 38.7344853699576 48.2883694323339  
34.2080003860523 30.7606118575469 40.9506062495231 44.0687697278114  
40.931294690669 42.6366765186182 36.8059561571675 36.131485826118  
41.5536168238478  
LOC730413 46.9939712192224 50.4872122867759 47.0940613507321  
46.0228732507872 44.9936360641969 174.392758289374 47.2927436772465  
45.3872406432794 52.7512110769042 92.3388129097482 69.7855392178808  
74.6734358603424  
LOC730417 41.9407041937973 42.7393803617562 44.0014471264417  
41.7064916467908 40.1151953732637 45.4607426241257 44.1430395960362  
38.2233438809487 42.3224812939526 44.7401523707775 42.9634662926872  
43.5321282980261  
LOC730419 39.7320564340365 42.2577689927563 41.528370959196  
41.0219290963778 34.7597195031128 42.5660695551615 39.8695929627783  
37.0390589468421 43.9450023643394 41.5804111566887 43.9802831041664  
35.0668743708816  
LOC730426 41.2424637338424 42.5269793679335 43.0971787292711  
41.7614975630362 43.5544347011646 40.4359177791566 42.9803717121865  
41.5464765641928 41.3803269429468 42.6793753550854 40.8225507267584  
36.9976231206067  
LOC730432 235.593721159442 175.28322146764 243.952697457779  
273.849703944739 133.38594323309 283.747865829282 177.088290547513  
222.570136481811 223.397586938079 448.508714709248 338.586852166449  
287.423909789368  
LOC730455 120.426087248804 299.094486437911 275.611524861938  
199.776860110557 138.349952332963 240.58403560014 242.899629257173  
219.073357087203 199.480636964499 125.484233748017 150.480087842118  
252.061166074743  
LOC730456 42.1537476443423 37.4540772310118 39.0775870687758  
41.8778873678551 39.3667161654772 36.2768299545794 40.9157352260901  
36.6452480995946 42.357910063876 42.2614524730856 41.7272875295469  
36.3454320848591  
LOC730479 41.5421429082231 40.5400384479766 42.7303139017786  
44.4367387274922 39.4693871570028 45.1873487463472 42.0605906240248  
46.2779564481158 42.6366765186182 47.9056710878325 40.8225507267584  
33.5578650644246  
LOC730510 48.0201377454632 47.087835967892 52.3432130135266  
47.2009420656854 49.0828761839116 39.0266821712099 42.2577689927563  
44.4031868028216 46.7760357462635 44.4652605017595 47.8988096575648  
45.7562276914441  
LOC730525 193.730784033221 251.2365884576 330.241189572237  
372.982648892131 332.322497133752 845.41973083225 124.965915196815  
218.056839407813 323.295794446334 299.428590398636 882.105892529265  
277.588692595406

LOC730534 1078.86166154061 1824.79010714035 1249.41227924272  
949.60074350774 1658.86829668934 1712.55038816005 2830.73694055758  
1483.40077183826 2559.659041589 792.880882528835 936.978983469829  
1065.70206468134

LOC730546 43.1805016690297 40.3384318592985 42.4580504587581  
48.856176220627 43.004943518025 43.1826328292558 39.1539892144371  
42.4580504587581 36.3649677956953 38.957687788868 37.7384958256497  
39.1553169409075

LOC730656 44.9896851005259 36.3110701990588 33.0260566875355  
36.4564050256915 35.9058393060637 43.3785777889265 42.4939802311136  
42.8482181313226 42.0621425894624 36.4651112441576 33.5370783156523  
43.6753843488695

LOC730684 40.2543341073001 41.4508241771315 42.2577689927563  
41.3027031037343 50.7615314686244 41.4508241771315 41.253645578517  
38.4540849632254 47.27543600687 42.4594149893798 41.8168470823451  
39.2469742642337

LOC730686 50.4872122867759 42.7775752471711 45.310660704531  
42.2496337895968 48.8381507187986 43.2805590023412 43.8206425661746  
43.1567024035183 50.2223403889892 43.1839109702714 47.6125796208753  
42.7782216342806

LOC730704 41.2424637338424 42.8542642792862 45.310660704531  
43.1847628331565 45.8051846088552 50.6360662655392 51.5967098638347  
42.0494116081998 44.4395580493118 59.0630473216622 54.1963147679251  
51.6660481331154

LOC730713 43.4626049853157 38.5921548841176 41.8389336728199  
40.0322420615846 41.9397336249742 47.8636003588181 40.3302268293707  
39.6995529770239 42.3138951003676 39.5637454855233 42.0750889188255  
43.1805016690297

LOC730740 711.773459577386 1053.67279913417 1343.66876893729  
1519.01001038342 668.961646543849 684.865133028228 1630.25992078321  
1313.92053019421 942.247437385029 491.100053064936 588.247843264181  
749.49934348018

LOC730744 651.078746026341 1398.21942794938 1080.43016747082  
713.880440315813 1125.81685334899 784.60990326608 1351.49940447914  
660.295993198711 1149.02954135912 774.8306350567 997.492549573274  
588.972273484465

LOC730746 46.8954576545929 52.1062000766427 43.4709415392696  
39.5050383901884 49.1928206164702 56.2736599756843 51.3064929551674  
57.445796273665 57.1863195337055 40.1179210534118 43.7585538437696  
63.6966761077037

LOC730760 36.7356360093603 35.6434124419782 41.2365089689635  
40.3180310664156 37.6527901109005 40.244271403831 38.0598374201407  
35.2642250366721 42.0621425894624 41.8613406887824 40.0766543123257  
39.3575468494941

LOC730804 35.1307934330047 41.159706131351 37.0642268327439  
37.29566077996 44.5668141895992 34.2773859804062 35.4623691645629  
39.3709357615493 39.9444191873552 41.4397539024976 36.2435874904689  
37.8490162439785

LOC730805 39.4710743516517 53.1278271804774 43.1931731665131  
41.8778873678551 54.6820069269589 46.8954576545929 49.8281348927244  
40.7311497914871 45.4799270968969 49.1928206164702 48.7502645382856  
45.1735152121056

LOC730809 37.2474303302343 37.1685072112618 44.0451487108213  
37.5382094267692 49.1928206164702 42.750861693377 32.1218888714537

33.2467975244196 41.863927676552 41.5435611403119 39.0550139257658  
41.0657892043496  
LOC730818 46.1673159982664 39.3999056968598 40.301483914446  
44.265834798964 33.2552842693684 41.4508241771315 46.8613212048981  
45.5581356216957 43.7630587657205 40.8970401536578 39.3667161654772  
45.0985088502363  
LOC730820 179.994715581707 137.955007835039 121.650910373947  
214.073500272341 139.08163074096 126.578693258328 105.05842887748  
88.1861828863404 200.019523376661 70.5704019848974 81.6472320169489  
104.089998273812  
LOC730833 35.6111578834671 36.89524015739 33.281531405287  
31.8431345631453 35.5220586859301 34.0045980663271 34.2773859804062  
40.047314525032 31.2688290305385 34.3674468322242 35.9563099719284  
36.8690774823319  
LOC730841 46.1673159982664 47.5647821785529 51.4308501933893  
42.6913548400127 44.4489662507893 44.3648993568405 48.8319884367456  
44.4031868028216 52.1186591838715 50.6486940895674 48.7502645382856  
45.2783024981315  
LOC730862 39.0620487644635 43.0971787292711 40.4070046183108  
37.651298468202 43.3332476888305 42.5660695551615 39.8695929627783  
39.0620487644635 39.0775870687758 38.3092241935352 39.7342718293432  
41.4508241771315  
LOC730877 46.0023068797812 41.4508241771315 40.931294690669  
44.7980740332174 41.8806343997257 46.1513019317765 44.6032218589199  
48.9826868640753 43.2761454096265 48.1392888470269 48.2050207071554  
45.0985088502363  
LOC730919 46.441301934328 46.9919960628953 43.0016969050339  
44.4367387274922 41.9842695818285 45.4882438975269 52.8496345990125  
43.7396619462033 45.2897806651929 39.2623423164488 43.5710871617107  
42.0424641526302  
LOC730920 48.1952521496489 45.6533175604486 53.4743535852344  
62.8201270538435 44.9936360641969 49.1013967533186 56.3376046940285  
54.0507720792049 52.7512110769042 52.3304586399695 47.8284278211109  
47.6938628797168  
LOC730926 36.5393857306744 37.920964499903 38.2280071951674  
38.2041059863839 36.5393857306744 32.4301586830653 37.0564573649223  
35.7973685350741 34.226171989766 31.5892202809227 36.9060997041453  
37.6557714476853  
LOC730952 38.385865183581 37.5469247328848 44.8872784170036  
35.314469458379 37.6527901109005 37.0180934800573 41.9393838138203  
40.1474543172332 36.6312676076142 43.7303813515864 37.7384958256497  
33.6902293666089  
LOC730953 41.2424637338424 41.9894412416874 48.9944486068347  
51.949834638817 45.4751076037511 39.2248354955045 48.0283573444179  
39.0620487644635 46.2027193115397 45.4614234442527 39.7342718293432  
43.6753843488695  
LOC730994 85.7983996395757 89.19837608959 232.77788697408  
155.287591646469 73.3533274030352 128.126336084436 74.7534423194688  
89.3868257841517 54.2825877218965 210.958578914607 172.221482103025  
146.87603018486  
LOC730995 47.8249696958403 47.9128504683618 47.9035532886869  
72.2577390063259 42.3685136297603 43.4681646416585 54.6414321010929  
47.5950227477807 40.0403898620771 42.5664883002833 41.2598458726002  
44.3521099857368

LOC730996 56.121460370892 61.18889498318 63.5107036952143  
49.1786207920603 50.7615314686244 116.685453817071 51.4349390827895  
45.4757965005055 49.6908735010946 43.844855336215 50.5381435455868  
76.0240426902567  
LOC731000 42.0833588105728 44.8955824420372 44.4652605017595  
42.8235313007746 43.2890595186135 41.159706131351 44.9863726205428  
40.2382908228517 45.0997987980157 39.9519547348106 42.3413611855132  
42.9887069977696  
LOC731002 40.8681871019812 37.4540772310118 37.3687900733549  
41.0726336841311 40.7779767565889 41.159706131351 54.1707158323527  
37.7612949798895 42.1594905198929 48.0211752672327 42.8263096141654  
44.9070250604284  
LOC731007 57.8765910878975 41.554942319225 48.2883694323339  
57.2856683017619 44.0451487108213 72.5482509922085 49.2546642180676  
44.1311654985682 70.3613168347492 53.6429962450784 54.4825201506931  
68.7753456118815  
LOC731017 46.9939712192224 45.7979032939211 38.5045333213784  
41.7614975630362 42.9090346219023 43.0860383229288 42.2577689927563  
44.0390019242862 39.3750969348308 41.9666541498638 34.064698871541  
42.8864415494484  
LOC731035 40.6559419616644 40.3384318592985 43.6670755115848  
37.1894304543751 41.7929491793697 46.4648868771662 39.3585350448719  
38.6454098044474 41.7627910693483 39.9948390976317 40.1742127891824  
42.1537476443423  
LOC731042 42.0532901689036 36.6968906669565 45.063792968927  
39.853175885492 37.0526522140242 44.7804080899431 41.3594868055879  
43.6434576713809 37.7384958256497 40.5090849993014 39.9070785037411  
38.5279745308203  
LOC731049 418.927102569912 952.16345035163 450.972039573066  
367.158502379417 2598.78910128081 498.608204176238 1769.18069954113  
1040.102982885 1204.34388579291 241.175454742029 275.096637886925  
269.546586017659  
LOC731050 49.6241203903354 43.7644428186265 43.0016969050339  
48.4916117779992 46.3150221024046 46.7800033479223 43.8206425661746  
46.8954576545929 43.4656637536244 43.7303813515864 43.0971787292711  
47.6040671292013  
LOC731052 35.4287975493553 40.716553247236 46.6588655218735  
43.3078542962968 40.3452320167286 46.7800033479223 48.6395795163502  
43.844855336215 38.9834959368496 40.6022003765153 40.3452320167286  
45.0035308952466  
LOC731085 38.7537364570873 39.1982470626863 42.7303139017786  
44.4367387274922 36.5393857306744 36.6271061451613 44.8643898647322  
32.229154316188 40.2274522635576 32.9003644440608 33.7948557837079  
30.8150126829901  
LOC731096 4858.39551231606 5246.60459228386 6673.00322263275  
3099.21690111993 9709.60940482862 6873.84878164654 6258.22561934986  
5218.25814076207 5297.71706629059 4216.69417265779 4916.82166008511  
6413.42384145372  
LOC731102 42.442231667357 38.5252456306656 40.0998167098057  
36.9912468186322 45.2556760873335 41.0582900711341 46.7100796279384  
41.0381860307445 45.6582729799009 42.785429206422 43.1931731665131  
47.6040671292013  
LOC731106 49.085741080241 49.2934904960601 51.9885249508283  
59.0965219753805 48.9627346956003 36.0306975524309 43.1931731665131

39.2672712041774 40.9901805728485 38.957687788868 42.170702295259  
39.3575468494941  
LOC731158 38.5007204246293 40.148780650831 39.3709357615493  
40.3180310664156 36.7356360093603 38.4330755397458 42.1607322031054  
43.844855336215 40.3316153483289 32.406093465115 39.8184668132023  
35.7451401627836  
LOC731159 38.8561375693335 39.9697332660833 42.9104454767916  
44.265834798964 49.452985143568 36.3845892764084 44.4639405506967  
40.931294690669 41.9635525160083 35.93950183586 39.8184668132023  
42.57175366709  
LOC731170 43.5710871617107 40.4359177791566 39.0775870687758  
42.9358255168086 39.0564222526273 39.7394181011603 41.706879587091  
38.2782436497441 41.074824727477 41.5435611403119 36.43924066428  
41.863927676552  
LOC731186 44.7915315085948 43.7644428186265 41.8751578329365  
41.4273122914951 45.8051846088552 43.4681646416585 46.1634822993009  
48.0582855095143 52.7512110769042 42.9866214102525 40.547835538778  
42.8864415494484  
LOC731196 43.1001512135266 42.3711524005238 41.0718387273629  
36.1562979552173 38.7004513165111 39.9397419279057 40.0603121770344  
37.5511560880902 37.10170285405 37.7315666632629 37.4345152884462  
42.6758568421347  
LOC731227 38.7537364570873 40.3384318592985 49.7350276169552  
42.6913548400127 42.9090346219023 48.260931742163 41.706879587091  
54.2877981508636 49.1940901905636 46.0119912782855 40.1742127891824  
41.6550823405646  
LOC731236 46.263826584899 40.8880530359822 38.0452862258803  
42.357910063876 42.4864576619427 41.0582900711341 45.6042625176633  
45.9604707098953 42.7150227340364 42.5664883002833 41.0050831223107  
44.5432192783161  
LOC731283 35.7012997405508 37.4540772310118 38.6727842796202  
43.1847628331565 42.9090346219023 36.6271061451613 41.9393838138203  
39.2672712041774 39.7537274655115 34.6720534245631 38.5668610487033  
41.4508241771315  
LOC731314 382.744696166534 636.367246129079 251.2365884576  
188.099292617901 567.086112633487 198.54718783437 1084.23003918768  
533.468347491982 668.961646543849 184.808179948172 203.373397813051  
152.272399644814  
LOC731338 41.7397731376692 38.7344853699576 48.1331309338997  
39.5050383901884 46.3150221024046 39.7394181011603 39.1539892144371  
41.3506832276112 43.1805016690297 42.6793753550854 35.1470994647364  
42.357910063876  
LOC731365 4458.76622334251 3153.71394627237 4093.70002166179  
3282.4852236415 4458.76622334251 4200.38495514552 3966.51586153125  
5601.18872540083 3263.05269150231 6606.35767508139 5438.34345794521  
5636.93532853955  
LOC731366 41.9407041937973 43.3458769998118 37.1643693306382  
36.890925044696 42.6022652963326 39.2985791324641 46.5650556481721  
42.9301944191913 41.2870505273664 46.0119912782855 45.0589947942306  
46.6397391251762  
LOC731396 48.8941062980393 45.9266745571724 44.4311655729487  
44.550322123994 56.6951078698291 45.6129956328415 50.6774883370457  
59.8760452220989 46.6944238390932 42.9866214102525 52.5154971256566  
47.3172462673426

LOC731408 36.2496364442264 46.5650556481721 45.4865173433646  
40.3180310664156 40.6723334103791 37.4782441311626 39.4600924554505  
42.0494116081998 40.0403898620771 39.0648733099061 44.2142581488029  
41.5536168238478

LOC731431 44.5282181324797 42.9358255168086 45.1569741609597  
40.8681871019812 40.0599807618105 37.9951997351435 42.8684958525042  
41.7419877611072 38.0213051227859 40.8970401536578 40.3452320167286  
39.3575468494941

LOC731432 44.1294459089314 45.7979032939211 45.063792968927  
44.9370339275041 42.6022652963326 40.244271403831 43.4544762830742  
42.7431359850339 41.9635525160083 39.9948390976317 42.911855821602  
48.1627097465883

LOC731438 39.0620487644635 37.10170285405 40.8420925848403  
40.9607305725196 36.7356360093603 35.5158505219112 38.7337086062875  
40.4359177791566 37.4540772310118 28.768101860452 31.6063174764616  
37.1747156131306

LOC731444 46.0023068797812 43.9421822132391 46.4569566520107  
42.8235313007746 39.6535880152834 48.9826868640753 46.0228732507872  
41.6466169548846 41.3803269429468 48.8623729374733 43.7585538437696  
43.6753843488695

LOC731486 74.4565795414712 160.672144085068 170.829628173552  
394.073743195755 155.712392689325 77.554620469891 137.239944506217  
72.4834467838798 112.131738588405 237.039707901886 292.065366215278  
204.273912273411

LOC731496 48.1952521496489 43.683792219729 46.0727230219512  
41.5464765641928 40.148780650831 40.040778349137 45.3597029614942  
42.8482181313226 42.9020321355927 43.4885245598939 41.3553369544097  
40.8681871019812

LOC731501 40.7609952437622 42.5269793679335 44.4311655729487  
39.9697332660833 45.4751076037511 36.8059561571675 39.0458123429605  
41.8417024632349 42.7150227340364 40.8049408996274 35.9563099719284  
46.2625470410195

LOC731548 44.6231541342 44.3529919625344 43.0971787292711  
42.1273928203021 39.1650142708257 43.0860383229288 43.0930293831497  
41.2551966132486 45.8325181856483 42.0621425894624 44.2925355984056  
43.0930293831497

LOC731640 299.74710723735 383.00934152588 396.93169345515  
641.837188326604 325.363156416947 708.839262759372 412.072103136251  
606.761670821739 404.356143472409 1032.44965920118 1111.89793143647  
1037.51323185348

LOC731641 50.315768338317 42.3550738181144 43.8495248991589  
46.7577982595088 37.956732373465 41.9543948167375 37.830876898596  
49.9332280449549 47.798305839406 47.3791873993182 42.8263096141654  
44.4475838947656

LOC731658 44.2350046179299 39.0102066700839 49.8344973836834  
49.1786207920603 38.9496515344837 42.8598805316863 45.223075311113  
42.2577689927563 35.1155486926999 44.1379638573455 45.7328341667151  
42.357910063876

LOC731670 42.1537476443423 36.3110701990588 46.2625470410195  
44.550322123994 50.0580547772867 42.9695585740813 44.4639405506967  
44.0390019242862 43.5669306063196 36.8059561571675 46.4205654140754  
43.5738557773903

LOC731682 72.8120269375546 36.89524015739 45.6989664108554  
35.1451084093692 47.6884372645373 37.9951997351435 41.0381860307445



84.607833108004 37.9273653326866 42.785429206422 35.3362091871364  
36.064718696392  
LOC731714 42.6036491382658 39.6995529770239 43.3085358214154  
38.4208429103799 42.7982502551634 41.159706131351 47.7390230243778  
39.853866204927 44.0519245668737 40.4136535208406 42.0750889188255  
38.745552403895  
LOC731742 38.304249186058 42.3550738181144 43.401782064778  
40.4359177791566 37.3508690072156 45.4882438975269 41.5817737564592  
43.3262148375525 39.0775870687758 51.8412522234186 40.4504608195666  
39.7411455670172  
LOC731777 90.1830062843449 132.508880040274 135.782043043499  
100.001150612051 102.597012252626 209.89649461562 79.1432909353319  
75.7947206223934 105.71315237465 66.0224755625662 71.5836731059913  
154.793640473854  
LOC731823 41.3387790895716 42.3550738181144 42.9641759692926  
62.1776700757427 40.9950639693255 41.159706131351 38.5474297403025  
41.3506832276112 37.3043739460234 41.5804111566887 42.5864346233886  
41.0657892043496  
LOC731827 41.9407041937973 44.9370339275041 41.0356368374708  
39.1706564265495 42.7107928951766 40.650742261428 46.3057385979341  
43.6434576713809 42.1594905198929 38.745552403895 47.6884372645373  
42.7782216342806  
LOC731835 48.8333989709933 44.0409178714232 46.5650556481721  
58.7338159410728 62.1836961153924 47.8636003588181 43.6753843488695  
68.9522412475296 44.8003345643334 43.9450023643394 44.9713479185144  
45.9693232070002  
LOC731837 49.7827734675743 38.9338521051669 42.8270038153139  
44.265834798964 40.9950639693255 42.2577689927563 40.1235656101329  
40.047314525032 44.0519245668737 41.5435611403119 42.6366765186182  
44.5432192783161  
LOC731878 130.848965290163 282.262229126907 196.096147690942  
304.49707512712 151.99110418225 167.943170737481 208.7739716139  
160.733526836282 196.760671234837 94.7110944331075 84.0305689846475  
161.38599012777  
LOC731884 39.8662795144616 38.2263227947189 39.9101908547397  
50.7046706880325 40.8873907150245 37.0180934800573 36.197424053556  
39.7509165247419 43.6670755115848 42.1622837416589 41.5421429082231  
45.3763275588341  
LOC731895 49.1868644496737 49.83247261979 45.989212296035  
77.6574950328663 64.7488184936482 48.3686935595826 40.9157352260901  
55.8087097725119 46.581796165231 104.068748231847 120.980558571109  
62.3102413989199  
LOC731898 38.385865183581 45.3486182278177 38.0452862258803  
42.4580504587581 38.0598374201407 40.650742261428 41.4742337714895  
51.6660481331154 42.2577689927563 38.3092241935352 47.1477056711335  
46.917149434588  
LOC731950 84.6811991332281 69.734208465775 65.4137646609535  
71.6050174762551 73.3533274030352 70.9514994373481 75.2101993995344  
77.0262811825953 86.4498396868205 67.4197263416701 64.3312319756553  
66.8544766980562  
LOC731985 758.462554576949 1366.59129560817 1184.75786736273  
989.0602710707 1147.19483787501 1557.42399344934 1161.71671016964  
1263.76838179117 1273.52492984569 1183.62228577053 1269.36837611919  
2237.08790397818

LOC731992 43.1805016690297 44.8529259387308 47.2962360458401  
43.074472921841 47.0954207417646 44.1737502492846 41.3594868055879  
42.4580504587581 42.8036731479932 44.4652605017595 41.1638563416981  
42.57175366709

LOC731999 65.2735059202804 110.379403044901 98.4930941487534  
85.8362180324381 118.57174795047 58.5530199658661 59.1040441894478  
116.066916521887 76.8864157610323 52.7288095750893 58.2315917325629  
99.6243435693941

LOC732007 369.952313383216 608.886783362316 790.094848284547  
501.585246203512 430.868309653765 407.564154455615 523.863193910096  
132.24963384417 622.435313940734 116.099186392258 171.485221601137  
488.089090043145

LOC732040 40.7609952437622 40.5400384479766 47.0940613507321  
38.4208429103799 44.8897737954573 41.8613406887824 37.830876898596  
46.4672637826582 42.6366765186182 41.4397539024976 43.401782064778  
44.2527566343661

LOC732058 33.6902293666089 45.6533175604486 42.157627240486  
39.2780515621926 39.859345745831 36.2768299545794 47.1345949868029  
43.5544347011646 35.9645119596869 35.0082729554459 41.3553369544097  
36.7762265039864

LOC732075 84.7642634532073 252.535061916875 164.097531361519  
85.3754356809649 153.827399203384 76.1991031349451 142.465925522042  
120.552647575158 187.331614826395 167.896094603299 186.866378606003  
98.7331384143685

LOC732107 39.5676051939342 39.5050383901884 41.6079958749402  
44.265834798964 44.8897737954573 44.2607789091176 41.253645578517  
43.4544762830742 44.8997235283254 44.3648993568405 46.6442692119997  
44.7401523707775

LOC732111 42.8036731479932 47.087835967892 45.2313723727673  
43.5627649099623 45.8051846088552 43.5752393599169 46.9929836306816  
39.5466975353131 46.8873421271259 48.8623729374733 44.1148826235374  
42.57175366709

LOC732138 38.2083710281545 42.5269793679335 39.5450079747895  
34.7266486944713 41.467005949568 37.5887129572848 37.3799542961839  
38.6454098044474 33.2715481910159 37.5343260962758 38.6662194645633  
37.0953622406687

LOC732139 43.5710871617107 36.6002100641539 43.0971787292711  
45.8844325913247 46.9906120932727 40.244271403831 40.2154497375715  
45.2806199505029 47.5564423692142 38.8507804383261 43.4709415392696  
40.2669497398702

LOC732150 44.9896851005259 42.4493032770053 44.2405728317107  
42.1273928203021 44.6834648302383 49.1013967533186 46.8613212048981  
41.9315419791594 43.2761454096265 48.2596564318071 43.844855336215  
41.4508241771315

LOC732156 44.5282181324797 44.1239711172417 42.3536549114165  
53.0284011078097 42.0709558258414 42.5660695551615 46.7100796279384  
43.2551508830106 42.992884918158 45.0155543555707 44.7114813656401  
45.8546719310325

LOC732157 42.1537476443423 40.6380495994768 42.2577689927563  
43.074472921841 48.5000946421718 43.4681646416585 40.6750540874299  
44.9977782988116 43.1805016690297 48.0211752672327 41.9908237694988  
38.1421709520616

LOC732162 40.9558083259517 46.0713306971594 36.9142463788171  
43.3078542962968 42.7982502551634 44.2607789091176 46.2407656943956

40.7311497914871 39.7537274655115 39.6719190054379 43.9802831041664  
41.1868052124344  
LOC732165 105.802035886293 75.7801512652102 87.2316853416374  
82.7394574977114 68.7911855725594 56.7429967489965 104.740168626646  
105.965906809429 153.940127525369 89.4747568145717 81.6472320169489  
85.1981126713031  
LOC732172 81.2359429678503 85.6038071277319 143.952224627989  
84.8948024208923 106.454367084321 94.7008981904016 102.499011190932  
65.4714272652857 123.25443049561 112.551747307723 110.909109947659  
80.4404044229341  
LOC732206 46.9939712192224 41.4508241771315 38.1421709520616  
34.3595588146954 41.0885562160946 40.8634043028528 35.2163900400329  
47.5950227477807 35.7973685350741 39.9948390976317 37.7384958256497  
36.064718696392  
LOC732226 37.3463875295726 42.1607322031054 39.0775870687758  
43.8002456102021 41.467005949568 42.4580504587581 42.9803717121865  
45.7476095696859 37.0126425326534 48.9826868640753 38.079222289614  
39.1553169409075  
LOC732275 38.8561375693335 37.6383530120621 44.5134109184888  
43.6726153508978 45.9104478407175 41.159706131351 37.2892641289258  
37.9837233601316 43.3744503319109 44.0409178714232 44.0409178714232  
41.4508241771315  
LOC732300 41.3387790895716 45.6533175604486 44.696023817801  
42.2496337895968 46.8674366115656 49.9699131196797 38.8417151851134  
44.9977782988116 43.9450023643394 40.8970401536578 44.7114813656401  
42.1537476443423  
LOC732313 45.1912496459517 37.7384958256497 43.7630587657205  
47.9915414951747 42.4864576619427 47.6803619768589 40.5585676679482  
44.293922970134 48.1174861108648 40.2112371512838 46.4753015651202  
41.5536168238478  
LOC732316 42.7150227340364 40.148780650831 45.4865173433646  
42.2496337895968 44.6834648302383 50.0748292497578 44.8643898647322  
34.3865306339645 43.3744503319109 36.6893251782922 41.5421429082231  
43.5738557773903  
LOC732343 36.6480005877129 36.6968906669565 42.3536549114165  
42.357910063876 37.2567512265363 40.1428591998404 41.253645578517  
40.1474543172332 36.2733735494625 44.2580151149956 41.9908237694988  
45.6692241948108  
LOC732371 46.1673159982664 55.0897019602305 59.8273072817267  
77.4676205299631 53.0419743379342 52.1024135605001 41.4742337714895  
44.6107027295193 45.4799270968969 48.6124127998952 46.4753015651202  
45.0035308952466  
LOC732372 39.1590964332473 34.9262464079777 33.8558232866797  
34.4382958501338 34.5301949364147 37.7000400506818 30.7315474127249  
35.9023742468744 33.3643994200057 33.2987269789328 37.5583886316038  
35.8429598823818  
LOC732381 41.2424637338424 41.8848959280916 43.6670755115848  
42.6913548400127 42.3685136297603 40.8634043028528 46.4388841354122  
38.3684202018524 36.4476883897928 38.745552403895 37.4642807402741  
37.7526485343328  
LOC732387 45.2875173643252 47.3536182445315 36.6522278218553  
50.7046706880325 48.0234896130991 43.4681646416585 54.4934782594218  
37.1317006162938 42.5406888281114 41.0057887014368 49.2206713037152  
47.2131144508464

LOC732391 38.6454098044474 35.2143190355414 41.437237454134  
42.9358255168086 43.4544762830742 48.3686935595826 41.0381860307445  
40.6171774724171 43.0930293831497 42.5664883002833 39.3667161654772  
44.3521099857368

LOC732393 42.8671710538782 44.069462769215 42.0164252051496  
44.0451487108213 44.8248621498677 41.1194494565538 44.2166118829877  
42.7431359850339 44.3734692860793 45.2556760873335 41.7614975630362  
41.3012916486748

LOC732416 45.5758521267508 43.5182502375207 41.785676764591  
52.1201052574162 46.0043807840705 39.3841861812262 41.706879587091  
47.2864663693787 43.3744503319109 43.2988017098387 46.4753015651202  
42.9887069977696

LOC732424 41.5421429082231 35.0222940937513 39.5450079747895  
40.3180310664156 41.1868052124344 42.5660695551615 39.3585350448719  
40.2382908228517 42.7150227340364 42.4594149893798 39.3667161654772  
39.7411455670172

LOC732425 93.2557602398938 76.6936010119768 84.9970776435852  
45.5869891570251 73.0433648756396 53.3185097662527 76.1869593072029  
71.8314470868658 67.9176876913772 64.2174369755376 64.7598303406649  
56.8534370691413

LOC732450 43.9309845324767 39.0894172982439 48.2883694323339  
56.0794100106654 35.3327761997046 42.2577689927563 46.7100796279384  
64.3284163241986 39.2809305246091 41.3321861371202 45.7328341667151  
42.1537476443423

LOC81691 75.3761360028971 89.9340376539354 141.154520472188  
70.7202372217584 73.8251606025227 81.9983163893373 129.2860308084  
251.027270265657 87.036020750455 95.2490714726663 95.39134217438  
64.9418945936106

LOC85389 97.4769942713663 112.714318425036 62.7605715573218  
74.2429851177794 109.758297200083 60.4065050472082 95.6697427870979  
86.4898752526885 57.3385421837183 112.17141283151 93.7444359334292  
65.1251519077199

LOC85390 113.218291314173 119.004636734744 93.6591201235745  
67.3439996689706 134.981483569602 67.5812474586277 81.2136969156029  
65.6914955077809 54.5952754712007 54.1683282066029 59.6608518093582  
47.3992733452821

LOC85391 41.9407041937973 39.3999056968598 46.9040704638073  
45.5869891570251 35.3327761997046 47.9503724044453 45.1017494688414  
42.9301944191913 38.9006788676407 37.7315666632629 41.8168470823451  
39.0536056496869

LOC88523 174.117816184497 81.5782824513693 92.8951148347802  
214.927272114101 104.486555491331 186.965367827758 65.2361525412756  
110.746059249478 156.088284999883 341.397811775105 171.623830248512  
151.641746442323

LOC90113 38.2083710281545 41.9894412416874 45.989212296035  
41.6564075217517 39.9697332660833 49.9699131196797 45.8980298854198  
39.853866204927 49.8304479381623 44.571915452417 49.6706535876636  
36.3454320848591

LOC90120 70.3757673501097 61.3838877877366 57.2107492415265  
71.0211264570699 44.5668141895992 58.8605811695948 66.0350709576651  
48.272324215504 55.3122077514658 56.3441077510744 61.7191344476295  
54.4992295592001

LOC90342 36.3649677956953 44.6918600441328 32.4466419672036  
40.0698728584484 36.9060997041453 55.7197525213035 35.8227939208521

39.5466975353131 41.1742244762318 35.6208308220005 39.9899430628542  
47.3992733452821  
LOC90379 93.3605294458382 112.613079254002 107.122319086614  
88.8330881965986 131.917451557976 90.1080159649841 96.0539709962851  
114.174791258883 97.3066473777771 102.926945888985 103.14577985944  
74.7001528966639  
LOC90586 693.056793637199 400.327164003217 519.775555680262  
691.94603958547 281.906398109158 260.740251007349 466.935292808402  
1089.08276262641 319.092568066532 1037.51323185348 897.198663109723  
673.002926695262  
LOC90624 53.0290605707162 63.6966761077037 70.4794854241035  
51.949834638817 71.2787833369055 85.8059456975413 53.4921736109774  
51.7538628098347 66.0350709576651 59.0630473216622 74.4379676234684  
64.7346994616044  
LOC90826 61.356483470053 80.1144023887293 86.8330533522204  
80.0042268333735 91.7629175712824 67.0290776715331 79.1432909353319  
69.3468840908665 82.0993943936197 80.0651801266824 68.3799828461475  
83.4319236092932  
LOC90835 132.37539586883 120.221914344372 156.294411442126  
105.580434427464 229.621795088195 68.3234331335073 129.2860308084  
463.84209540456 66.2552876795581 94.5788538659874 63.2684764441521  
84.1780237893807  
LOC90925 42.0532901689036 48.2220547806679 46.8267540220952  
70.8835636550472 50.2163892855092 48.8744644207821 48.0283573444179  
41.5464765641928 46.3203995372658 41.2276963324981 43.5710871617107  
44.8372404608604  
LOC91431 31.3422392302759 44.7829632472754 35.5220586859301  
42.6913548400127 43.1252272136667 34.2773859804062 38.1793598983615  
46.2779564481158 42.7150227340364 40.8049408996274 41.1638563416981  
38.3291713594599  
LOC91461 77.8130233266962 46.9919960628953 48.1997158668729  
63.7909104347097 38.8456942580061 268.097966292089 50.2016912396771  
47.2009420656854 42.1594905198929 141.830305704504 150.723391206253  
181.545493080363  
LOC91561 5855.6498679729 9709.60940482862 10910.7672404363  
6027.02412617194 10351.5373412096 6555.04068292972 8703.02873382565  
4368.11345948444 7476.94487791412 8144.52133665388 7627.46814033012  
7562.42822724655  
LOC91661 59.987045425047 49.4982025424177 57.6371756925687  
44.265834798964 66.1650385535549 46.1513019317765 45.4799270968969  
74.383456365584 38.1169703906207 87.3815040456105 64.6446465846487  
67.0331844416938  
LOC91664 46.0920218698606 50.7487159427973 67.9850517608624  
51.7739270955254 59.5844022026141 54.9108046955355 63.3924515518667  
48.0582855095143 61.1022920882065 54.2830238965339 56.9320717885002  
57.1441484662045  
LOC91948 46.6348258763289 40.6380495994768 47.5673419710251  
50.5310598656998 43.2484996523549 37.8102105794655 41.4742337714895  
44.293922970134 44.7058233759912 41.0057887014368 46.5650556481721  
42.0424641526302  
LOC92017 50.379587451669 50.0425298550559 58.9135553403521  
89.4504034432321 42.7107928951766 52.9482338979681 49.6872467499977  
69.9709625205629 49.9951674107458 74.3981029634178 68.9745034946434  
65.4435809676217

LOC92154 42.5193208629123 41.159706131351 43.401782064778  
41.8778873678551 48.9627346956003 41.3553369544097 53.0277416531043  
46.0633179231318 42.992884918158 45.4614234442527 39.5399188536544  
42.357910063876  
LOC92270 53.3967242431461 45.8669209716694 61.841867306916  
45.5869891570251 46.0977687311222 46.4648868771662 41.253645578517  
45.642304356051 44.4395580493118 57.9713749600418 84.4349803529132  
61.0025829061063  
LOC92497 48.9906383294199 54.4190527512508 58.2986825661503  
47.8164193292842 66.1650385535549 51.4931742685391 70.1184116246724  
67.5206810636627 51.4413099192899 65.0928075335306 64.4570366205389  
53.0446815750355  
LOC93349 48.0201377454632 48.9259041798949 40.5734458834617  
35.0448343468967 41.9842695818285 33.5578650644246 40.9157352260901  
36.0306975524309 50.3245489035833 42.785429206422 43.7585538437696  
43.7672102682067  
LOC93463 46.5549623118323 42.3550738181144 47.0940613507321  
41.7614975630362 34.806104801006 44.7804080899431 47.7390230243778  
41.6466169548846 43.2761454096265 36.1550293353654 47.0940613507321  
42.57175366709  
LOC93556 38.304249186058 52.683711208052 50.9933795450314  
39.853175885492 38.5512429290626 40.040778349137 42.9803717121865  
36.5393857306744 35.2143190355414 49.5265949137207 45.4799270968969  
41.4508241771315  
LOC93622 120.381190859636 156.433762355183 177.958475301951  
113.388372364837 156.822939275312 127.418173390084 97.0155195562193  
116.275899706695 235.420582508332 256.215133513379 214.980684661682  
166.511915820497  
LOC96597 38.385865183581 42.2577689927563 40.0998167098057  
42.357910063876 36.08956004634 35.2067831864574 37.6036146841933  
36.9355798143571 40.9901805728485 41.1222709786153 37.4642807402741  
44.3521099857368  
LOC96610 57.0006212637829 56.8373628733077 55.6865353018811  
46.3203995372658 59.4830424460714 55.4694986901287 66.8475050031365  
47.6952179922944 64.0541263553251 47.611018474151 49.1067959632109  
55.0767527801658  
LOH12CR1 48.8333989709933 43.4396866157171 47.646800205189  
40.0698728584484 43.1252272136667 60.1042270393382 43.8206425661746  
49.6203214143464 43.4656637536244 53.6429962450784 47.299647867533  
47.3992733452821  
LOH3CR2A 50.4872122867759 43.3458769998118 41.3366779545815  
44.0451487108213 42.6022652963326 94.3953345963359 42.629412460409  
55.8087097725119 43.0930293831497 47.2299678280724 46.5650556481721  
74.4365426051588  
LONP1 388.132295362791 377.409970666607 286.243476131448 344.133384411423  
849.412637017524 343.94159167652 408.216955625565 405.496884468464  
587.385368995676 263.53897660224 354.634819362978 260.766438659762  
LONP2 150.685575301101 189.80672643731 253.683753201667 146.268519891864  
96.0418367475772 148.871702513875 193.468773556057 151.960017107922  
196.465477936749 200.591114641608 319.871452890512 222.05036990665  
LONRF1 65.3531590366085 80.4822328865 125.794379028627  
136.644759501653 73.8251606025227 178.269900400454 112.436153468759  
79.7170181855209 93.0888239577809 127.265200736376 124.646386399592  
138.401109242778

LONRF2 38.5332184743306 43.0971787292711 40.4070046183108  
35.8472302065546 42.7982502551634 50.2729836196996 39.4916414839923  
46.5421017969405 38.9834959368496 49.3654837541353 44.2925355984056  
47.0832527687464  
LONRF3 51.9950964009224 42.7775752471711 46.7871293903346  
77.1614179978243 59.9326265577462 64.8903340853337 42.5660695551615  
48.9826868640753 60.5060523570927 42.2313175006715 46.4205654140754  
54.6874970862239  
LOR 47.2862299990938 48.9899488302637 46.4569566520107 47.3574589211166  
47.6884372645373 40.244271403831 39.7576136507593 40.831207953647  
42.992884918158 43.4885245598939 38.079222289614 37.5556299264699  
LOX 251.027270265657 56.2851430356168 48.9944486068347 96.5813769696577  
75.2391243965793 80.7067505750848 50.3519150282938 52.1788489555942  
49.9162522057712 52.2256177934134 50.2203578628217 61.8529316708431  
LOXHD1 39.266565827316 43.4396866157171 37.8386378737561  
38.0958223740111 37.956732373465 45.7300501624017 39.5496902678788  
47.7889447429963 34.6720534245631 35.93950183586 46.6442692119997  
39.2469742642337  
LOXL1 57.3630011621358 85.3227908896318 55.8166847286859 44.550322123994  
50.420938814754 46.6872654833579 41.5421429082231 42.3180724671488  
93.6124140212565 48.4890615340603 48.9259041798949 61.940656536312  
LOXL2 34.5886782974123 35.6434124419782 34.8956628705329 39.853175885492  
34.806104801006 39.9397419279057 37.3799542961839 37.9837233601316  
30.9728654320265 32.1011040606811 38.1835938174625 40.4639532172338  
LOXL3 87.3342335690393 53.1278271804774 53.4743535852344 97.6774247176874  
62.046151104685 67.3469281984384 56.3376046940285 63.61404854326  
43.0930293831497 53.5498255316009 52.5154971256566 47.9566297250148  
LOXL4 87.3342335690393 53.4109882045447 34.0382693188794 73.8480604979804  
67.4534389579576 70.380703483689 54.4934782594218 70.9702772728923  
50.3245489035833 108.525500270474 80.1419822448876 96.3918711895208  
LPA 41.6687259447533 41.6983305956441 40.5408342010585 44.3590588464211  
45.309807308023 43.0033908522754 43.0930293831497 43.786922650815  
45.7142099426845 44.33220061455 43.0773390292639 43.2264757900051  
LPAL2 40.5126641248076 42.1276725293078 38.8409188321958 41.1517285623672  
41.6806984441849 40.3986197290255 39.2533668167483 39.695950920869  
38.0648056183784 39.6719190054379 39.8569760226552 39.3726008114151  
LPAR1 138.027432399991 111.333692153793 90.7037473522607 216.526205739151  
76.093116738739 243.898313340098 72.4025631353475 64.7838753386185  
133.64996113791 215.15351875081 203.729732499418 270.922452389109  
LPAR4 52.2236479204029 46.4861258030402 44.696023817801 65.084620579901  
47.4548471240051 47.4699236780425 45.6042625176633 54.1731035633439  
44.8997235283254 48.2596564318071 52.4393177875001 47.3172462673426  
LPAR5 114.016824404095 224.665128374218 114.611557317665 101.008449241109  
52.6922486991742 72.149478755262 145.77302334589 109.922909644299  
147.023857419777 108.486774731927 116.547937420457 112.316483867372  
LPCAT1 194.225364352044 253.207750345072 115.962193866339  
321.171736253617 163.43197105141 123.768417863139 475.881757842864  
271.206999109791 86.3533120291957 106.963092569134 112.984042589704  
120.392561825049  
LPCAT2 55.1306642449627 53.4735821194294 85.1661952927159  
107.799236230743 41.6806984441849 48.8744644207821 51.1541843174981  
61.130286531713 69.0037087543684 93.0626550693989 61.6702707724448  
68.8529879402902

LPCAT3 248.058310353348 276.360065404067 227.94699237549  
112.585860083115 196.29493890075 118.410983614453 220.167309646966  
174.416924448198 468.267514612816 297.187417426993 303.281551940647  
237.864776225441  
LPCAT4 55.3153799233744 90.1632837282491 98.0352049248004  
52.6947911480086 93.5717680539357 59.2643906275025 84.3526980051279  
78.253478446856 102.457537266105 113.090530993447 109.961868592118  
104.398842509776  
LPGAT1 51.8781065691038 49.4982025424177 55.2879801058102  
42.4580504587581 44.9936360641969 47.0940613507321 44.8643898647322  
49.4372551433223 52.4539007817929 41.9666541498638 49.1067959632109  
57.2767879969284  
LPHN1 68.6627996695828 59.0322602067702 88.6771566133367 49.1786207920603  
143.563236821003 86.2563919366781 52.773844004595 68.0342444360948  
77.9978216366573 57.3562426592112 69.2293488487819 53.5643281930979  
LPHN2 71.1521292570086 50.3586212130973 76.6914642534934 42.357910063876  
57.1935729219207 78.5276518966943 36.4098694708483 42.8482181313226  
37.7384958256497 49.7259371799014 66.3481553496766 53.0446815750355  
LPHN3 39.512606833112 39.5573415356949 39.3303857231606 35.6307720751591  
40.6723334103791 45.3233134695905 40.6750540874299 35.0181575202066  
44.1211971585961 38.5921548841176 39.0061493066838 41.2905987859365  
LPIN1 338.355170063433 169.554408876006 132.679840262941 456.467726693355  
224.14182624489 571.790034754076 437.411540294212 682.479411898549  
215.399634344016 225.960701908311 295.5163490537 277.878824242495  
LPIN2 74.6776631832355 57.4376528157926 60.4347860127923 73.6679006272617  
67.4534389579576 64.6835308827804 70.3499898024786 69.0819394834919  
77.6052681514721 60.8250302910721 58.1937489966884 56.1136936405786  
LPIN3 45.3872406432794 50.8812920005251 51.9214790114499 42.6913548400127  
47.4548471240051 47.3791873993182 34.806104801006 47.8947595316832  
57.7865070833351 57.5713378330876 47.0110068985119 53.0446815750355  
LPL 70.5096706089299 60.1102859845739 113.18951586976 226.057278804077  
56.359578588344 76.4439037944547 72.0568616357755 59.0262390168156  
40.6957787921451 42.3606390470387 43.5710871617107 43.7672102682067  
LPO 36.0144420013819 38.6414316877471 36.769073068743 37.5382094267692  
43.4544762830742 34.1806289878747 38.1793598983615 34.6977013306396  
38.9834959368496 36.3612409063792 37.7384958256497 35.1451084093692  
LPP 764.858304889802 395.144059157625 389.248080358801 406.219918936024  
339.262360833465 3592.44409869527 290.81245174957 678.684833360104  
349.096725048776 2167.91218703382 2816.7754199004 2779.37660132136  
LPPR2 76.5505585423421 47.2055133646385 62.5610562594275 67.7121534934164  
92.6736029146947 61.2387559102636 45.6042625176633 83.5767232665142  
66.7750249658122 88.3335649692467 102.380096190518 72.8306652548968  
LPPR4 45.9090659324223 44.9370339275041 46.1653991089885 48.9944486068347  
37.9116800161496 43.5416683728269 43.4544762830742 63.5295088521896  
44.9645354363967 107.453572798098 319.596352961751 91.1363393944977  
LPXN 194.644164648125 495.359878931451 774.8306350567 1234.59589464045  
90.6661301391451 186.265538054701 147.65688475427 217.533011278692  
80.6434122355417 313.528012643479 249.855746700674 282.90107781812  
LRAP 7022.41612496714 4717.02689540013 4406.55576617324 4482.5285743878  
3282.4852236415 2167.91218703382 5733.54417656207 6555.04068292972  
3176.96480659196 7168.83136860899 6309.53691418065 4820.70258471362  
LRAT 41.0608773166058 36.0366673493555 44.8872784170036 39.3750969348308  
43.9450023643394 35.4142595025086 36.3194282084339 39.3709357615493  
38.6322728994674 43.2988017098387 37.3687900733549 37.6557714476853



|       |                  |                  |                  |                  |
|-------|------------------|------------------|------------------|------------------|
| LRBA  | 155.762961582213 | 212.813224717262 | 259.769260154253 | 114.41703170676  |
|       | 216.526205739151 | 122.036614711384 | 232.740032714891 | 249.411435337932 |
|       | 277.665554240228 | 320.13475752314  | 339.854688605186 | 264.335068353741 |
| LRCH1 | 43.2724556187214 | 37.3634897565502 | 42.8270038153139 | 39.5050383901884 |
|       | 40.7273974755431 | 36.6271061451613 | 36.7892997857376 | 38.5457716679071 |
|       | 40.0870341983328 | 37.8592299544905 | 38.4689132737495 | 37.4554876386402 |
| LRCH2 | 75.9909523932333 | 49.9085372049438 | 46.8267540220952 | 58.9168466928565 |
|       | 72.4060089486729 | 187.767803297395 | 53.8687221233237 | 66.9340967279385 |
|       | 64.2174369755376 | 105.118498939628 | 108.779357041421 | 152.72007888133  |
| LRCH3 | 71.0340758556049 | 93.8968899420039 | 95.3754438202863 | 76.7806009547111 |
|       | 113.964753321316 | 74.9006142438341 | 47.5963750520409 | 91.9919654450652 |
|       | 79.4528447794527 | 73.4447529556358 | 83.5069968129733 | 97.4709987978999 |
| LRCH4 | 110.214922820817 | 105.34055372228  | 139.191263237202 | 170.999578495858 |
|       | 101.46584765758  | 75.2337946941103 | 80.882176929636  | 81.2228688683149 |
|       | 91.4888405899074 | 70.5704019848974 | 71.2915496628252 | 81.5582217750731 |
| LRDD  | 54.6793272901524 | 100.386011517899 | 111.626292905866 | 59.1771672022928 |
|       | 80.1294564809102 | 57.1266329529869 | 82.0081006332668 | 63.61404854326   |
|       | 87.1183334887694 | 86.9626166234066 | 91.0309075163394 | 71.5327770882433 |
| LRFN2 | 42.5193208629123 | 64.1607001437806 | 44.6032218589199 | 38.0958223740111 |
|       | 45.5809132232681 | 42.5660695551615 | 87.6018870099686 | 64.5257016285499 |
|       | 48.3119523820103 | 42.2614524730856 | 45.5707650534259 | 37.2810767789306 |
| LRFN3 | 212.688298502868 | 193.951097560903 | 199.007437365676 | 90.5216273844682 |
|       | 420.761600667193 | 161.04166688561  | 288.816567137193 | 193.196385709124 |
|       | 316.831358204198 | 170.255635587223 | 267.523307072523 | 176.461729584652 |
| LRFN4 | 87.9251957244202 | 109.130081850144 | 51.9885249508283 | 51.223859150798  |
|       | 142.614006543733 | 55.0009147092272 | 142.945182805248 | 87.069143362676  |
|       | 76.7100878053735 | 49.5265949137207 | 54.8532558909227 | 44.1452943804044 |
| LRFN5 | 43.1805016690297 | 45.0905928998779 | 48.4890615340603 | 50.7046706880325 |
|       | 53.4109882045447 | 218.773587021224 | 40.2154497375715 | 58.5406981871153 |
|       | 44.619512785899  | 97.7620313090597 | 95.0604882262201 | 59.7999569757275 |
| LRG1  | 314.533750876361 | 135.592113666246 | 179.378838766172 | 269.044011137638 |
|       | 185.54813083393  | 90.2790229242453 | 121.195506364658 | 128.503671563486 |
|       | 170.450752247109 | 75.9037617394486 | 92.6230008876347 | 93.0474674148534 |
| LRGUK | 43.6706764143908 | 38.8336427948187 | 40.8420925848403 | 40.9607305725196 |
|       | 44.3557408297309 | 38.9378717994178 | 40.7910160811527 | 41.7419877611072 |
|       | 38.3418933808844 | 44.0409178714232 | 43.6629145624937 | 42.2577689927563 |
| LRIG1 | 137.696331574552 | 59.9682734755814 | 83.9004792286435 | 113.179313022693 |
|       | 43.7517118200398 | 146.634440537624 | 38.5474297403025 | 55.0698932795613 |
|       | 70.8606919488782 | 79.4658178984941 | 90.1696131791736 | 80.6200293361016 |
| LRIG2 | 73.0970339739187 | 68.8195659637992 | 94.7718338968252 | 71.7167037224069 |
|       | 96.332996264667  | 64.0985088513857 | 66.8475050031365 | 86.7710020879725 |
|       | 73.8800799416166 | 96.3495443565738 | 93.6717518147993 | 92.5011103881887 |
| LRIG3 | 61.1022920882065 | 51.524711857679  | 58.637422084759  | 52.5307002738469 |
|       | 60.6400800519777 | 85.3718124658316 | 49.3854238365325 | 68.6704961638492 |
|       | 60.3977304934451 | 60.6266092582071 | 67.1477341610979 | 65.0495374451854 |
| LRIT1 | 37.4554876386402 | 41.159706131351  | 44.2405728317107 | 44.0451487108213 |
|       | 43.004943518025  | 38.8336427948187 | 40.5585676679482 | 37.33030683349   |
|       | 36.8127605061228 | 39.3698811593364 | 41.9908237694988 | 39.8497227447888 |
| LRIT2 | 45.0985088502363 | 39.9697332660833 | 39.6451483836089 | 39.853175885492  |
|       | 42.0709558258414 | 42.750861693377  | 38.4005795891396 | 35.5798430594271 |
|       | 35.6139301508335 | 37.8217989841918 | 35.3362091871364 | 42.0424641526302 |
| LRIT3 | 43.4626049853157 | 43.683792219729  | 39.3709357615493 | 33.0463640202858 |
|       | 47.5647821785529 | 39.2985791324641 | 38.941855825269  | 41.8417024632349 |
|       | 44.0519245668737 | 38.0078357808393 | 38.745552403895  | 39.6352613956998 |

|        |                  |                  |                  |                  |
|--------|------------------|------------------|------------------|------------------|
| LRMP   | 52.4179224871914 | 355.67721196018  | 270.543988412382 | 250.359859946258 |
|        | 78.9088042058577 | 74.9006142438341 | 128.024853362102 | 64.4156641487994 |
|        | 205.346264347637 | 326.303950252592 | 238.584514797019 | 231.859167242606 |
| LRP1   | 66.3095900379311 | 42.7775752471711 | 41.0356368374708 | 45.7397504535169 |
|        | 37.6527901109005 | 64.5187138759372 | 41.253645578517  | 44.1311654985682 |
|        | 43.5669306063196 | 48.3693338695392 | 54.4825201506931 | 47.3992733452821 |
| LRP10  | 154.355197155161 | 229.659465419141 | 248.414210905199 | 201.616017553422 |
|        | 113.298540312696 | 207.928770428477 | 117.439175394651 | 99.2432911346944 |
|        | 171.386815652277 | 209.658186168638 | 197.868575583033 | 208.269627315418 |
| LRP11  | 135.323750661937 | 266.129007472128 | 269.438510636306 | 61.7502624458447 |
|        | 107.094663242259 | 108.718422641679 | 102.626604917608 | 133.151333210366 |
|        | 185.360921731157 | 216.004059887037 | 210.768576894328 | 320.452418537108 |
| LRP12  | 49.1868644496737 | 49.2050538150106 | 51.1347974668251 | 51.3851157261451 |
|        | 46.9906120932727 | 44.7804080899431 | 48.6395795163502 | 46.5717043290731 |
|        | 42.6366765186182 | 43.401782064778  | 46.3370338074996 | 35.1451084093692 |
| LRP1B  | 42.2455707947223 | 39.8695929627783 | 39.1799070031819 | 39.3750969348308 |
|        | 41.8806343997257 | 42.357910063876  | 43.8206425661746 | 41.0381860307445 |
|        | 36.3649677956953 | 42.785429206422  | 37.0180934800573 | 38.1421709520616 |
| LRP2   | 35.7012997405508 | 37.3634897565502 | 36.9795961564828 | 40.3180310664156 |
|        | 39.9697332660833 | 41.6590564937735 | 42.357910063876  | 43.3262148375525 |
|        | 39.7537274655115 | 40.7063426028871 | 37.1059647239814 | 43.8575940017119 |
| LRP2BP | 41.9407041937973 | 52.683711208052  | 43.401782064778  |                  |
|        | 42.4580504587581 | 41.0885562160946 | 45.4882438975269 | 38.8417151851134 |
|        | 44.8997235283254 | 45.0997987980157 | 44.8997235283254 | 40.6373400186325 |
|        | 45.8546719310325 |                  |                  |                  |
| LRP3   | 578.311131274653 | 354.634819362978 | 159.393207489822 | 158.862722884436 |
|        | 697.57030127315  | 547.442608452594 | 528.840700144811 | 393.001025840896 |
|        | 326.500804513133 | 215.645475520124 | 268.936151471133 | 185.54813083393  |
| LRP4   | 46.441301934328  | 98.5746416750459 | 63.9148277361329 | 39.2780515621926 |
|        | 58.8961770381033 | 42.0574848021044 | 49.1067959632109 | 46.4672637826582 |
|        | 116.287075019475 | 68.6788460999238 | 54.7883681830995 | 56.1875519519366 |
| LRP5   | 183.584085676174 | 376.931257615162 | 180.930509520136 | 74.6159297822533 |
|        | 269.438510636306 | 124.890309370032 | 343.764108830519 | 251.210603834628 |
|        | 273.231509963261 | 255.946758662074 | 249.195312452368 | 423.608694638779 |
| LRP5L  | 107.836867810972 | 175.018819532801 | 132.84476910529  | 185.54813083393  |
|        | 217.721787448311 | 94.7008981904016 | 239.385229462309 | 161.563526062761 |
|        | 124.22494803053  | 259.276586396099 | 210.768576894328 | 242.792365320043 |
| LRP6   | 48.7646976789783 | 47.2055133646385 | 53.7792717770978 | 48.665578118898  |
|        | 46.1804647841331 | 48.8744644207821 | 43.1931731665131 | 47.0940613507321 |
|        | 43.2761454096265 | 47.7180816682562 | 47.0110068985119 | 48.0350549043063 |
| LRP8   | 69.7442393277127 | 56.2851430356168 | 46.3411353377615 | 62.3936376596431 |
|        | 84.8751572193902 | 44.4311655729487 | 60.1705241170421 | 64.2512089157122 |
|        | 60.7942162859036 | 46.614092935749  | 40.2649309204478 | 47.3172462673426 |
| LRPAP1 | 112.924613715969 | 265.520773157991 | 154.752920877816 |                  |
|        | 231.154569340492 | 194.189674572424 | 159.554916039519 | 143.822560762049 |
|        | 117.835389983392 | 166.45998863285  | 120.381190859636 | 184.808179948172 |
|        | 159.12163104195  |                  |                  |                  |
| LRPPRC | 343.304521604977 | 194.278792348966 | 166.431392410887 |                  |
|        | 136.891616331257 | 351.039814818516 | 257.948490663615 | 269.618616631857 |
|        | 305.554059609771 | 255.724996015069 | 304.877336204875 | 295.312692092025 |
|        | 207.928770428477 |                  |                  |                  |
| LRRC1  | 84.5829208578248 | 118.143444770806 | 136.04447103201  | 46.1148643659988 |
|        | 169.156238463327 | 73.9456720099807 | 208.553134986809 | 166.33117014492  |
|        | 163.877163712385 | 112.02980664709  | 130.261747462753 | 129.613152757362 |

LRRC10 44.2350046179299 42.5269793679335 41.8751578329365  
38.5252456306656 36.4434672195785 42.157627240486 40.4359177791566  
43.2551508830106 41.9635525160083 45.3530683538086 42.8263096141654  
44.4475838947656

LRRC14 136.027869418465 172.102568448455 144.757886965525  
62.1776700757427 190.921576470336 75.5561597374812 116.311176407088  
82.8218647837178 117.976703022492 105.828093778276 143.693373312575  
91.0346886951891

LRRC15 203.228211195516 51.0175677516029 77.0301627655229  
89.6115806694241 61.4366256816323 48.9826868640753 49.6872467499977  
50.5070012045444 66.4251023257203 43.4885245598939 50.2203578628217  
42.4607795638552

LRRC16 89.0495215957248 67.4018925617901 67.4280399954084  
65.3191216270241 62.3233491851723 56.7429967489965 118.27400376579  
144.898757916905 72.7071934110997 88.2056147099779 67.8570354010492  
96.6957892186886

LRRC17 82.0925058822176 43.9697775048582 53.2874286456249  
51.8412522234186 44.2607789091176 107.440379066528 42.551356054931  
43.3925093042325 39.3750969348308 81.7699038961293 50.1649089793069  
45.5435778478662

LRRC18 39.266565827316 33.5924201549249 41.2365089689635  
42.9358255168086 38.0598374201407 40.7616966228404 38.941855825269  
36.1375121409002 39.0775870687758 40.8049408996274 37.1059647239814  
32.554751989205

LRRC19 44.436995101921 39.2907645923217 37.2838080935695  
48.1662933382789 41.0885562160946 44.6524308640784 41.4742337714895  
41.6466169548846 41.1742244762318 33.9967481174035 43.401782064778  
42.6758568421347

LRRC2 44.9370339275041 39.8695929627783 39.7697110924474 40.8084239472012  
41.1507980856436 70.2553917409773 46.4388841354122 39.6995529770239  
43.510508423355 63.4610447573417 47.5733603903505 61.8529316708431

LRRC20 127.50316411791 69.9567689220876 55.2776978524578  
49.0816063338953 71.2168693013526 67.4018925617901 105.05842887748  
94.7718338968252 179.016449848479 66.4251023257203 59.5489241599954  
55.2214187655851

LRRC23 72.7441949116991 46.6598879466655 65.3531590366085  
55.1240750633045 55.8173045043348 65.3672880026114 65.1041577962151  
64.8336014343435 76.1019439127881 83.5895816521251 95.5920087912438  
73.0770820500921

LRRC24 46.6348258763289 48.4980626712175 46.2625470410195  
37.8442841690502 40.8873907150245 36.6271061451613 39.2533668167483  
35.7973685350741 41.1742244762318 40.1179210534118 38.5668610487033  
37.8490162439785

LRRC25 51.6974465478564 45.3022591001932 46.1312573416873  
98.2447263268855 39.6535880152834 49.8472708021525 45.2852528185486  
37.5511560880902 39.5806465938526 43.2988017098387 48.6184776976167  
40.4639532172338

LRRC26 331.591589534469 136.517445122438 55.094385444315  
59.987045425047 84.6563174894574 46.0364000143537 137.764748752401  
153.405734390061 96.4112435621587 41.2276963324981 42.8263096141654  
46.3411353377615

LRRC27 42.8036731479932 44.6918600441328 36.8730514568925  
40.646702696033 34.2638875325204 34.2773859804062 38.4005795891396

37.0390589468421 38.1169703906207 42.2614524730856 41.0808257270221  
43.3744503319109  
LRRC28 115.894467332637 105.902612356755 98.2180003781859  
118.316810638061 100.305262467668 103.343354834837 94.7980740999988  
68.9522412475296 125.091427687365 183.799353414581 137.156113501125  
138.916915463074  
LRRC29 48.5123041297835 45.3022591001932 58.112348043634  
51.1313686723929 49.6507190068324 52.7156971154405 43.1602899171656  
49.0145368354835 49.4786466722535 67.7189686993694 58.8188963227059  
51.2318935933116  
LRRC3 48.1125722136997 56.6146179789815 47.0940613507321 50.7046706880325  
63.3638417360105 42.750861693377 47.5963750520409 38.079222289614  
45.0017158586743 53.6429962450784 55.3147456054175 46.6397391251762  
LRRC30 43.5710871617107 38.3322849790657 43.0016969050339  
47.9915414951747 41.9842695818285 44.7804080899431 41.5817737564592  
43.844855336215 39.9444191873552 46.5650556481721 43.1931731665131  
38.4330755397458  
LRRC31 47.6397712007919 45.7317208802318 42.640829914102  
41.1886975241176 46.3150221024046 39.4953494583071 41.1507980856436  
44.5029690493211 48.8067321016961 41.2276963324981 44.0409178714232  
38.4330755397458  
LRRC32 362.853023741815 136.250317107253 140.629562742418  
185.54813083393 116.362441774156 274.994470779348 41.706879587091  
140.288771064502 48.0163377492228 87.2316853416374 116.388069891158  
167.16650846037  
LRRC33 67.6011992144113 77.268323196327 81.2850357499192  
246.433145017965 67.1278109419819 122.599723509633 86.2118355769367  
67.6767845246581 54.2825877218965 56.8201201798712 65.8748459696377  
49.3087627580849  
LRRC34 36.9060997041453 48.3699741879723 37.4642807402741  
34.9221408381038 37.8679241954337 40.1428591998404 39.0458123429605  
35.6825474397235 36.7267557061938 38.1042454705119 38.5668610487033  
36.7762265039864  
LRRC36 37.6397652536077 39.0894172982439 38.8775560911841  
44.0451487108213 41.2740822675592 39.3841861812262 43.4544762830742  
40.5158867964016 37.2810767789306 38.957687788868 37.3687900733549  
37.3600014814388  
LRRC37A 45.3872406432794 46.7591817286632 45.063792968927  
42.2496337895968 44.2607789091176 40.5281496800812 40.2154497375715  
43.7396619462033 53.5224822626949 39.5637454855233 45.8180710486329  
44.8372404608604  
LRRC37A2 39.6609238036815 36.5219488315447 41.528370959196  
37.1894304543751 40.6723334103791 38.7340969861754 37.830876898596  
40.4359177791566 38.7298222155532 36.5806287103157 41.0808257270221  
42.8864415494484  
LRRC37A3 37.0320432433314 39.1982470626863 32.4466419672036  
39.9697332660833 36.6354013629791 39.9397419279057 37.1643693306382  
35.4526946152955 37.7384958256497 34.7308008643142 43.6629145624937  
38.6454098044474  
LRRC37A4 58.0688807932 60.6400800519777 64.6446465846487  
61.5515639412892 51.6433699009012 38.0648056183784 76.8788592884109  
82.2266112813039 67.6699686085575 58.5087296620514 52.2229654768933  
47.1060577218993

LRRC37B 61.543929939985 64.193536444915 58.3853148450483  
65.6502223413705 53.9412154719864 55.6571390857551 64.8367546135053  
68.9522412475296 67.2649356062263 80.0243450227647 63.4610447573417  
63.1646322810687

LRRC38 37.3463875295726 48.1627097465883 45.4865173433646  
48.1662933382789 50.3713170502557 45.6129956328415 57.6643188499117  
43.3262148375525 42.992884918158 45.5776159432079 42.0750889188255  
44.2527566343661

LRRC39 45.3872406432794 43.1805016690297 38.5045333213784  
32.554751989205 36.9060997041453 40.5281496800812 37.830876898596  
40.6171774724171 39.7537274655115 41.1222709786153 40.547835538778  
38.6454098044474

LRRC3B 41.6354649482853 41.4223563635976 38.4043916290561  
44.7401523707775 49.2267897689452 72.149478755262 44.5390641547628  
44.5029690493211 40.2274522635576 49.5265949137207 60.394307846869  
44.4951343330035

LRRC4 39.266565827316 35.1224289925572 43.1931731665131 43.4410741327254  
35.7973685350741 36.0306975524309 34.2773859804062 42.2577689927563  
34.1294694030979 30.9403229851671 32.6463318577756 36.3454320848591

LRRC40 52.0299937917925 50.8812920005251 46.4569566520107  
43.4410741327254 59.0965219753805 53.7442594289333 50.5252048155459  
46.3685439301234 43.3744503319109 46.0713306971594 44.7114813656401  
51.0013344286851

LRRC41 108.649424858333 146.551751666276 143.639231185825  
72.4834467838798 128.38299874379 110.088243267424 129.810477623628  
100.234661597218 122.504770242427 104.288073521816 106.897106266912  
102.035798846699

LRRC42 400.760646547012 216.911833562615 260.85727391155  
160.605530211736 413.620123676085 246.771126452577 344.737170118121  
150.011814577972 346.621778258188 215.08694410402 236.536058101486  
274.994470779348

LRRC43 46.8954576545929 43.5182502375207 47.3861758958576  
40.1804147506786 37.6527901109005 42.5660695551615 42.2577689927563  
48.272324215504 44.8997235283254 47.2299678280724 41.4508241771315  
44.3521099857368

LRRC44 41.7397731376692 35.8227939208521 39.5450079747895  
44.7980740332174 42.269054475455 44.3648993568405 43.6753843488695  
47.9942520395434 44.619512785899 40.2112371512838 38.5668610487033  
42.2577689927563

LRRC45 98.3126451737573 77.720889005668 86.2118355769367  
60.2989690950183 114.611557317665 58.3738081897999 159.925087917307  
108.512469038407 88.3547192423874 74.9006142438341 71.3068231787348  
54.4586176399381

LRRC46 43.6706764143908 47.9128504683618 40.8420925848403  
41.0726336841311 43.1252272136667 37.0180934800573 42.1607322031054  
44.4031868028216 47.5564423692142 30.6485078361448 38.8507804383261  
37.9607839934735

LRRC47 125.891602778425 166.910579215196 148.027258506301  
111.347228208501 206.08791147394 141.364814429951 158.464244518317  
203.759116151774 147.875578127733 138.027432399991 117.074650076861  
129.810477623628

LRRC48 41.8772051675749 45.1193245439293 40.8880530359822  
44.9928555006158 45.0801960661124 46.8954576545929 41.1742244762318

42.0847226073592 42.4682481612094 42.1317134987795 42.5023941254529  
39.9941474864076  
LRRC49 62.0553450433433 56.463481075522 52.6275131390249  
66.4047895961325 50.7615314686244 99.6288131333575 91.983638239817  
92.4953883194488 81.6508259258669 120.129857395808 146.483908799607  
121.969082013079  
LRRC4B 35.8208542506595 41.3277288245157 39.991353369336  
39.4569929845912 38.8834538955 37.1317006162938 38.3291713594599  
37.7612949798895 35.2604260353347 38.0078357808393 37.4345152884462  
41.1066323911308  
LRRC4C 45.0985088502363 39.0894172982439 45.4865173433646  
37.651298468202 40.8873907150245 39.8455060654531 44.8643898647322  
46.3685439301234 42.9020321355927 40.7063426028871 41.8168470823451  
45.0035308952466  
LRRC50 34.6977013306396 48.6447083765118 42.9104454767916  
103.734064904898 44.2607789091176 40.5281496800812 44.7255207589606  
44.8997235283254 45.1899271235974 42.3606390470387 44.8872784170036  
45.2783024981315  
LRRC51 57.4376528157926 61.4800543360853 57.0427273538849  
49.3654837541353 47.3172462673426 56.9320717885002 71.0369238830779  
60.6706478075023 65.0217598379984 69.5080454202415 58.3586374083245  
66.8026147385682  
LRRC52 39.1590964332473 36.3110701990588 38.8775560911841  
41.3027031037343 39.4693871570028 40.3357777530419 37.1643693306382  
40.2382908228517 45.3756389170606 36.4651112441576 34.7308008643142  
44.7401523707775  
LRRC55 36.6480005877129 35.8227939208521 39.7411455670172  
34.5425384901279 35.0181575202066 39.2248354955045 42.0605906240248  
39.3709357615493 39.3750969348308 30.0771630269067 30.802355637173  
39.5418280570561  
LRRC56 70.9419509323007 71.3015974749703 67.4280399954084  
46.3203995372658 105.187381311145 42.8598805316863 49.3854238365325  
63.9851732498913 64.4098139218465 61.8529316708431 50.7159667633757  
45.2783024981315  
LRRC57 59.6008106247114 77.0244607682203 55.3812135024656  
57.4595416719581 90.9521112485099 59.1570467228834 85.6236091398006  
72.5835488194631 75.6883778954949 70.194061829681 90.807818984128  
78.5108643908344  
LRRC58 86.2021418088902 58.4476706144086 68.6095266659765  
112.23915619297 105.739423435604 91.1271533616476 73.4820932957859  
85.9474373829081 127.685709088018 78.3186115281795 66.5539062525344  
93.2688173550974  
LRRC59 47.3791873993182 44.5884811528117 45.6989664108554  
41.6564075217517 47.8075998240396 40.5281496800812 40.7910160811527  
42.357910063876 39.1790517315259 46.6598879466655 44.1148826235374  
44.9070250604284  
LRRC6 46.9939712192224 98.5746416750459 70.6592421895338 63.7909104347097  
51.7983110178095 45.0882356578404 58.0969258817391 47.2864663693787  
62.5542376788358 57.3562426592112 45.4799270968969 56.5225014032155  
LRRC61 79.0304119352941 50.6229884142872 51.9214790114499  
54.6089451252049 67.0163226819964 46.263826584899 54.9765783642973  
43.7396619462033 61.9682048429354 59.1496467460507 51.7538628098347  
50.2163892855092

LRRRC66 35.7012997405508 44.5884811528117 30.7315474127249  
36.264823544143 38.0598374201407 38.4330755397458 35.0305278582179  
41.9315419791594 38.1169703906207 33.8984830800739 42.4580504587581  
36.064718696392

LRRRC67 38.957687788868 37.6383530120621 40.301483914446  
44.4367387274922 36.7356360093603 37.7000400506818 40.5585676679482  
42.7431359850339 36.5393857306744 38.957687788868 33.9478220100351  
37.3600014814388

LRRRC7 42.5193208629123 38.4330755397458 39.9101908547397 41.0726336841311  
40.3452320167286 40.8634043028528 46.3057385979341 36.8400213077707  
41.1742244762318 38.745552403895 42.0750889188255 34.9138625012006

LRRRC8A 129.525395445221 133.074560812703 166.834334710682  
129.434864701718 156.433762355183 129.675613712326 125.052841200703  
95.5822406197756 109.241121384212 117.033529761587 124.512081978396  
122.160438114932

LRRRC8B 42.8036731479932 49.4067286971348 43.1931731665131  
40.9607305725196 47.5647821785529 43.8582747295766 37.9430145836712  
42.0494116081998 43.8482802038826 39.2623423164488 44.1148826235374  
43.8575940017119

LRRRC8C 46.441301934328 57.5941849631773 44.4311655729487  
83.877343750194 46.5557478175976 58.2531879680192 47.5963750520409  
72.2610650652674 48.8842909466002 46.5650556481721 46.6442692119997  
54.8630527326985

LRRRC8D 115.454858442166 90.4512650366645 109.251112569215  
111.347228208501 90.9521112485099 73.5743059777365 109.901105821696  
90.3916996175708 61.6839343510302 57.6791750431251 66.4251023257203  
56.2804354745795

LRRRC8E 52.6364613846829 52.9240098541574 66.4079972657486  
46.3203995372658 54.3554233228353 43.9366081640576 60.2938279880998  
60.2276476399612 53.7886950010803 58.2167393576361 55.1804535845496  
54.6659845741133

LRRCC1 48.4614401417022 67.3136079922956 68.8610875361536  
61.2213001749372 53.214727701348 70.380703483689 67.2811786080606  
52.7787010032051 48.273999446798 50.1314528043038 57.0427273538849  
53.3059058105836

LRRFIP1 1999.21832626916 1047.33749100342 841.850722284484  
1595.69503047506 513.266895252699 1093.44570094368 1457.72260892651  
2393.42629339901 875.787532301293 2865.25344854768 2844.5506310828  
1985.3999418878

LRRFIP2 102.786429761295 75.2431285480772 95.4252587480277  
102.605473054584 153.544554979202 170.932645135423 133.344625514809  
93.769294435694 99.0596863442346 109.581139823852 124.76401857899  
126.564008534823

LRRIQ1 42.3433931248155 37.3634897565502 38.4043916290561  
37.9875302985336 34.2638875325204 39.8455060654531 39.8695929627783  
40.3357777530419 37.3600014814388 38.528621456378 41.0808257270221  
38.6454098044474

LRRIQ4 34.9138625012006 43.9421822132391 44.1452943804044  
44.265834798964 38.5512429290626 40.5281496800812 40.2154497375715  
36.43924066428 38.5252456306656 43.9450023643394 38.4689132737495  
39.9519547348106

LRRK1 43.7920955808549 51.2776048338 40.3397581924196 45.8102081251786  
48.7288537840562 42.6575535390785 43.7540438144593 39.4223544019653  
40.6957787921451 47.4534495228738 44.5152708955623 40.8098117292322

LRRK2 40.0557788909923 42.2900457798748 40.7910160811527 71.5249259772583  
39.6535880152834 51.0071565607171 42.629412460409 39.4710743516517  
43.2761454096265 41.5435611403119 41.3145333832821 38.745552403895  
LRRN1 38.304249186058 42.1607322031054 39.1799070031819 41.6564075217517  
43.3332476888305 44.4619248757502 80.6634117492762 64.120219344545  
75.6883778954949 39.8873706855774 42.911855821602 42.57175366709  
LRRN2 67.0325169699626 39.6479637904026 46.6241521517453 44.8727287473605  
46.4775637378703 52.2089306840125 42.57175366709 59.3618843678775  
45.0997987980157 47.7779356299965 50.3221380889396 46.5975976305093  
LRRN3 44.3355304829989 47.5870162399764 43.9450023643394 45.4634652319753  
41.9842695818285 52.888431709934 43.3262148375525 47.7889447429963  
41.2870505273664 53.3577647219133 48.3847843498476 42.1860813954352  
LRRN4CL 66.4399491500833 44.7829632472754 39.0775870687758  
40.1804147506786 45.2556760873335 109.352296288717 33.6696565339534  
51.6660481331154 40.2274522635576 69.7729022157455 69.8899273527731  
52.7530873093837  
LRRTM1 41.7835997867848 42.7275315121163 43.401782064778  
44.3440839686558 42.4493032770053 42.4580504587581 39.0458123429605  
43.3262148375525 40.6957787921451 43.1839109702714 41.0808257270221  
44.0451487108213  
LRRTM2 47.4678477186801 40.148780650831 37.2838080935695  
40.646702696033 41.7929491793697 37.3799542961839 40.5585676679482  
39.2672712041774 47.5564423692142 39.0648733099061 47.2134341420411  
42.7782216342806  
LRRTM3 40.4639532172338 39.6995529770239 44.2733573199954  
44.0451487108213 41.5407238526121 41.2098211956301 47.2927436772465  
44.5029690493211 42.38204124321 41.1638563416981 44.3763859390287  
41.5132248356707  
LRRTM4 54.3554233228353 52.0268699306396 46.7508829977587  
70.506090074243 61.1216330559316 55.0009147092272 50.0088611244948  
52.1788489555942 48.8067321016961 55.1089864632456 51.7538628098347  
49.4786466722535  
LRSAM1 62.4317959077388 85.0162042963215 79.5707751325986  
65.813547096222 76.093116738739 77.554620469891 88.5511408870489  
79.4053001255904 67.0489032883986 88.1199908664065 90.0852769448901  
80.3730667493235  
LRTM1 42.2455707947223 69.3106426188075 42.157627240486 39.7411455670172  
45.5809132232681 37.2686490268265 40.0052661202207 38.8495095797881  
37.4540772310118 38.8507804383261 43.401782064778 43.6753843488695  
LRTM2 45.7356815244513 43.0227387991135 41.528370959196 40.1804147506786  
35.4484652445078 39.9397419279057 40.3302268293707 33.1477313087177  
40.0403898620771 43.0919221375514 42.2618615571566 35.3525469364579  
LRWD1 185.563590013028 143.932614622477 114.224091812993 127.375858030077  
258.30549459038 108.08526252608 141.396509967298 177.584394977912  
141.180682718758 115.235144612428 139.071851755156 108.660169650259  
LSAMP 62.2150049214174 63.4570909617664 47.646800205189 60.9379216295576  
69.493532577364 64.3383155834968 49.540449125788 51.9447450229707  
40.9901805728485 60.0372015630618 50.8826620053386 49.7336769474446  
LSDP5 72.8120269375546 57.9509155144056 72.2797007105795 79.262977183608  
70.9638091288679 49.641159251878 78.3082773071531 105.743957034577  
50.401623258584 94.5788538659874 96.7799695976296 100.677422836631  
LSG1 172.89937021234 88.4740208892504 87.9152471471338 91.1834104205004  
151.451107406752 96.5287245311078 147.65688475427 144.17470770145  
147.405190988088 108.709630036731 87.036020750455 93.7924763988692



|        |                  |                  |                  |                  |
|--------|------------------|------------------|------------------|------------------|
| LSM1   | 1342.10592868516 | 997.492549573274 | 1005.45493369789 | 1254.72625904639 |
|        | 1465.98242110921 | 989.0602710707   | 981.039763059681 | 1130.2486883492  |
|        | 647.868022835702 | 981.039763059681 | 877.673009984357 | 1202.11455437028 |
| LSM10  | 164.722166245312 | 133.911556922212 | 131.413578749264 | 188.928047145068 |
|        | 191.523447800488 | 243.110664214453 | 109.456162739433 | 130.62791061956  |
|        | 125.676172266736 | 155.855834721836 | 140.976643799742 | 162.721587349434 |
| LSM11  | 57.1046180136491 | 43.683792219729  | 49.3000844711116 | 56.2508140932179 |
|        | 55.8173045043348 | 72.7213787264217 | 56.4809146784765 | 43.2551508830106 |
|        | 53.1249776278067 | 58.9836017745712 | 76.4389426517528 | 82.2650787041549 |
| LSM12  | 87.3759678085472 | 96.6963826355216 | 94.284665243755  | 100.289042948128 |
|        | 128.89714160809  | 91.2681347227088 | 97.5394336319916 | 94.1762630490912 |
|        | 126.319731178054 | 71.6537776654915 | 72.2544131004774 | 84.8276953169119 |
| LSM14A | 381.426926151034 | 538.572110053093 | 451.820169649522 |                  |
|        | 522.434355629388 | 646.323419285676 | 699.488969175268 | 622.964590694346 |
|        | 420.401914084346 | 805.309720893073 | 700.010354583503 | 568.905368101326 |
|        | 542.467997217663 |                  |                  |                  |
| LSM14B | 48.8333989709933 | 47.5647821785529 | 42.7303139017786 |                  |
|        | 52.1201052574162 | 65.8319449883221 | 54.9108046955355 | 54.339958888486  |
|        | 52.9813204449021 | 49.4786466722535 | 54.8979897528792 | 52.104880481326  |
|        | 51.6660481331154 |                  |                  |                  |
| LSM2   | 794.806085783439 | 461.607803139448 | 353.942271533457 | 344.38057912034  |
|        | 825.558929673308 | 593.801086643125 | 759.94822128584  | 518.074074000609 |
|        | 806.827205415602 | 536.73426937255  | 531.869698775629 | 561.855286945959 |
| LSM3   | 464.495132469257 | 579.482255191456 | 356.079406408042 | 399.410299413602 |
|        | 757.257495810249 | 483.313014703768 | 702.737741114234 | 1382.25775340179 |
|        | 482.5816387921   | 325.769076169162 | 320.330057050615 | 597.191426276771 |
| LSM4   | 392.237227927376 | 779.333013700435 | 507.239294307089 | 325.676668250281 |
|        | 1221.31634960736 | 519.144074985679 | 808.857027942253 | 821.013687795434 |
|        | 949.278493776928 | 501.585246203512 | 583.915973546284 | 517.869378941762 |
| LSM5   | 349.90835241442  | 346.116601612353 | 276.550265506988 | 313.528012643479 |
|        | 555.356799014777 | 330.470972281607 | 383.371300272181 | 392.237227927376 |
|        | 529.977491403949 | 217.189489936251 | 245.996655628334 | 381.426926151034 |
| LSM6   | 42.9104454767916 | 51.119812302881  | 48.3847843498476 | 46.614092935749  |
|        | 46.4343327861696 | 39.9397419279057 | 44.7255207589606 | 43.3262148375525 |
|        | 55.9423752286714 | 45.1569741609597 | 44.553780984244  | 51.5741598315033 |
| LSM7   | 669.419736252343 | 1237.93130196998 | 891.080174768895 | 600.34379987143  |
|        | 3421.24021192326 | 1105.00321488322 | 1658.86829668934 | 871.238169066998 |
|        | 1829.30985071028 | 559.559234461244 | 690.568858101531 | 728.257836227637 |
| LSM8   | 98.4930941487534 | 86.9032093551446 | 82.9449579428926 | 97.8309399470621 |
|        | 117.893268074013 | 102.163854544231 | 80.6634117492762 | 94.6432868887401 |
|        | 107.420552630045 | 66.3956936248447 | 73.0970339739187 | 71.7408778060956 |
| LSMD1  | 142.585892496231 | 157.250548147161 | 247.416016413788 | 221.743315748689 |
|        | 154.355197155161 | 238.584514797019 | 253.462941029119 | 166.572463787763 |
|        | 168.492959515167 | 192.564048264712 | 176.866350130563 | 199.007437365676 |
| LSP1   | 55.1306642449627 | 62.5528124447176 | 62.1642339365777 | 117.005559382662 |
|        | 45.3991914045361 | 75.9982017195791 | 50.6001747368221 | 53.0446815750355 |
|        | 62.6860949544223 | 61.3919023984003 | 57.1514228214026 | 49.6629259325705 |
| LSR    | 84.0838244121421 | 102.760704801607 | 69.5544840164738 | 42.5269793679335 |
|        | 97.2696348255648 | 54.4753345912615 | 177.27613997459  | 80.9907498621309 |
|        | 128.208688034402 | 68.0556717366572 | 64.514219270247  | 52.6922486991742 |
| LSS    | 85.8362180324381 | 76.5816788793344 | 108.08526252608  | 77.9085946827079 |
|        | 100.83436298853  | 94.4999269932618 | 94.739351091808  | 82.0682043421788 |
|        | 97.6326743942878 | 77.1767494799711 | 75.3075812535743 | 69.7095546047257 |

|           |                  |                  |                  |                  |
|-----------|------------------|------------------|------------------|------------------|
| LST-3TM12 | 39.266565827316  | 37.10170285405   | 40.4882741869718 |                  |
|           | 42.8235313007746 | 40.2449343247539 | 39.8455060654531 | 42.0605906240248 |
|           | 42.157627240486  | 40.8970401536578 | 40.1179210534118 | 36.7283081422707 |
|           | 43.2776458914333 |                  |                  |                  |
| LST1      | 61.4121672148248 | 62.275808835675  | 68.2557347293255 | 350.796638646601 |
|           | 44.8446015771755 | 83.7019398654324 | 106.190104122745 | 68.0649030501515 |
|           | 43.9104473952446 | 53.8716214229685 | 48.4717951775049 | 48.2123120250343 |
| LTA       | 47.0940613507321 | 56.6927078228789 | 48.3847843498476 | 95.9391851122771 |
|           | 42.3685136297603 | 44.6524308640784 | 52.0942589368478 | 51.9447450229707 |
|           | 49.9951674107458 | 43.7303813515864 | 50.5188367542048 | 43.7672102682067 |
| LTA4H     | 355.7118155732   | 505.018127833201 | 588.247843264181 | 1416.47763911039 |
|           | 498.608204176238 | 519.775555680262 | 502.67939538729  | 439.770250139925 |
|           | 726.42773300581  | 677.855726232203 | 606.481020597082 | 671.458899624447 |
| LTB       | 85.7208881534518 | 233.692490031492 | 140.853812988562 | 613.27814206548  |
|           | 55.8709511400674 | 65.1291617069903 | 151.266092912661 | 141.572530741416 |
|           | 65.429256309049  | 57.165971310746  | 49.8135461150818 | 43.4290452504928 |
| LTB4R     | 93.8361140725228 | 66.0147097736612 | 59.5444359507702 | 171.238235624104 |
|           | 72.1154333023225 | 59.0686629877982 | 74.2690269784394 | 112.930164222877 |
|           | 60.3977304934451 | 54.1683282066029 | 61.8445915808329 | 53.9431600945419 |
| LTB4R2    | 50.7390160399184 | 51.3800036046133 | 42.9104454767916 |                  |
|           | 37.9875302985336 | 37.956732373465  | 39.8455060654531 | 50.5252048155459 |
|           | 36.9355798143571 | 42.4540072551568 | 36.3612409063792 | 39.0550139257658 |
|           | 40.8681871019812 |                  |                  |                  |
| LTBP1     | 39.3100256336821 | 38.0834507308871 | 43.3085358214154 | 39.5050383901884 |
|           | 42.4864576619427 | 42.8598805316863 | 39.7162631015511 | 39.3113207075992 |
|           | 43.7630587657205 | 41.6373771565199 | 41.5421429082231 | 41.7072675309997 |
| LTBP3     | 129.268600210689 | 103.147467743978 | 81.4367600457584 | 89.3342384381684 |
|           | 145.14768503072  | 167.095818680513 | 100.344513700137 | 99.9896394343368 |
|           | 128.485596739193 | 144.290966198687 | 174.148714092395 | 96.3918711895208 |
| LTBP4     | 123.321810678947 | 152.078104394345 | 128.732177437756 | 91.3475300950304 |
|           | 114.445779948228 | 555.356799014777 | 89.815123920749  | 120.001312008518 |
|           | 76.4584539766255 | 326.500804513133 | 411.431488342465 | 131.779333469955 |
| LTBR      | 532.35007819883  | 962.079396754147 | 667.837116137964 | 471.172160927946 |
|           | 383.853296408061 | 462.562743021008 | 659.981410181288 | 458.351940464467 |
|           | 960.526372655577 | 449.564281713066 | 565.72800641089  | 380.541502795438 |
| LTC4S     | 43.7585538437696 | 48.5905518770847 | 48.0654860391912 | 51.7739270955254 |
|           | 41.3387790895716 | 149.5664106654   | 47.8164193292842 | 42.357910063876  |
|           | 40.2274522635576 | 60.2877434874622 | 54.6603683143597 | 41.5536168238478 |
| LTF       | 38.6454098044474 | 51.3800036046133 | 41.528370959196  | 84.8948024208923 |
|           | 41.7929491793697 | 40.5281496800812 | 46.9929836306816 | 35.6825474397235 |
|           | 48.8842909466002 | 41.3321861371202 | 44.9713479185144 | 41.5536168238478 |
| LTK       | 41.187562301961  | 47.3875317429043 | 42.108130037421  | 41.4727452533295 |
|           | 40.9416717019827 | 41.554942319225  | 46.3057385979341 | 39.9576138799997 |
|           | 43.7078399718247 | 39.1832968442811 | 42.8263096141654 | 37.0431286518306 |
| LTV1      | 138.67794356779  | 125.676172266736 | 142.066425511614 | 112.368910939752 |
|           | 154.509548705054 | 128.981582396627 | 135.997802304719 | 99.5192591352063 |
|           | 120.465621774337 | 99.7807691901691 | 113.68110396901  | 176.594203350958 |
| LUC7L     | 77.4186160113063 | 79.3614922672599 | 106.809028844031 | 77.5352427498412 |
|           | 96.4112435621587 | 81.7500436717038 | 81.5926902505707 | 63.3768687067745 |
|           | 83.2240772671045 | 108.251353392321 | 89.9650488563894 | 87.9871827215149 |
| LUC7L2    | 59.6008106247114 | 59.4253780950488 | 61.1076362129586 |                  |
|           | 56.4578213622965 | 64.4999048115671 | 71.5249259772583 | 58.5087296620514 |
|           | 53.6210959113222 | 69.6511571901941 | 81.7171463878604 | 78.1856721173896 |
|           | 68.7753456118815 |                  |                  |                  |

|        |                  |                  |                  |                  |
|--------|------------------|------------------|------------------|------------------|
| LUM    | 3099.21690111993 | 345.294930735691 | 130.960165577212 | 1058.61208471961 |
|        | 560.954913956997 | 1762.93413846062 | 60.9648845690177 | 613.740813446728 |
|        | 89.2385568686014 | 781.223434214089 | 428.729935028911 | 428.105433953405 |
| LUZP1  | 410.716248834784 | 304.41727337972  | 298.988745247509 | 311.810240385503 |
|        | 422.702925141293 | 303.323289734056 | 318.768560912915 | 417.201611973051 |
|        | 292.735673136799 | 550.100918659768 | 537.471287449696 | 408.739953606815 |
| LUZP2  | 44.1294459089314 | 45.0905928998779 | 51.0539624358342 | 54.8412943008635 |
|        | 44.2607789091176 | 48.0350549043063 | 60.2399886747451 | 45.642304356051  |
|        | 44.1519466943185 | 47.4767851750188 | 48.7502645382856 | 53.655233033193  |
| LUZP4  | 40.3478825593224 | 32.8881500803623 | 35.8265993915844 | 38.745552403895  |
|        | 35.3327761997046 | 38.1169703906207 | 37.2892641289258 | 36.7460922671619 |
|        | 33.4698406117406 | 34.8137085420423 | 31.0126568324233 | 37.1747156131306 |
| LUZP5  | 40.148780650831  | 38.2263227947189 | 42.157627240486  | 41.7614975630362 |
|        | 43.2484996523549 | 46.3715909653832 | 43.4544762830742 | 40.047314525032  |
|        | 41.2870505273664 | 39.1621898366355 | 41.4508241771315 | 39.6352613956998 |
| LXN    | 268.936151471133 | 226.843444192483 | 169.251790128723 | 311.361885152025 |
|        | 99.6821042055758 | 280.275836993258 | 163.20801480093  | 338.586852166449 |
|        | 50.6750785584772 | 138.151998239414 | 110.909109947659 | 351.439404852971 |
| LY6D   | 49.1868644496737 | 267.427827956058 | 500.241231327789 | 44.265834798964  |
|        | 60.2886873195135 | 40.9506062495231 | 38.941855825269  | 47.8947595316832 |
|        | 45.1899271235974 | 106.897106266912 | 358.083401917765 | 52.5752569429057 |
| LY6E   | 1529.52516575545 | 801.694261678224 | 527.439095170064 | 223.826005691932 |
|        | 684.865133028228 | 455.444228161475 | 331.762920362224 | 592.989860385203 |
|        | 1117.26060212107 | 376.931257615162 | 618.892379887961 | 544.946796643478 |
| LY6G5B | 50.2203578628217 | 43.8495248991589 | 49.4573631027613 |                  |
|        | 40.4359177791566 | 44.2607789091176 | 43.4681646416585 | 39.0458123429605 |
|        | 42.9301944191913 | 41.1742244762318 | 41.3321861371202 | 40.547835538778  |
|        | 43.8575940017119 |                  |                  |                  |
| LY6G5C | 43.3138142470517 | 43.9697775048582 | 46.9578963946094 |                  |
|        | 42.5054997771887 | 40.8270141118472 | 39.9871741554388 | 49.3103031996204 |
|        | 40.4359177791566 | 45.7911932481722 | 45.4953384153622 | 43.5245157030183 |
|        | 43.128936937037  |                  |                  |                  |
| LY6G6C | 43.0001432913058 | 36.6968906669565 | 41.3366779545815 |                  |
|        | 39.5050383901884 | 35.7973685350741 | 31.6981395162348 | 42.2577689927563 |
|        | 34.4896350146096 | 36.8127605061228 | 37.4302011516587 | 37.6484782516569 |
|        | 37.8490162439785 |                  |                  |                  |
| LY6G6D | 36.2496364442264 | 38.9338521051669 | 39.4710743516517 |                  |
|        | 43.8002456102021 | 44.2607789091176 | 48.1591264215184 | 41.1507980856436 |
|        | 32.7676164492555 | 40.4220196471124 | 40.1179210534118 | 40.3452320167286 |
|        | 42.9887069977696 |                  |                  |                  |
| LY6G6E | 38.8561375693335 | 38.2263227947189 | 38.7745734037492 |                  |
|        | 37.651298468202  | 40.3452320167286 | 39.132725377815  | 56.7780520416533 |
|        | 42.357910063876  | 36.6312676076142 | 38.8507804383261 | 41.4508241771315 |
|        | 45.1735152121056 |                  |                  |                  |
| LY6G6F | 41.9407041937973 | 37.4540772310118 | 39.1799070031819 |                  |
|        | 36.264823544143  | 42.3685136297603 | 39.7394181011603 | 42.4939802311136 |
|        | 33.0038344711883 | 41.6616444147804 | 39.3698811593364 | 40.547835538778  |
|        | 43.0930293831497 |                  |                  |                  |
| LY6H   | 50.0802438185974 | 50.0425298550559 | 56.8168526942685 | 50.1185085888209 |
|        | 42.0709558258414 | 49.0558421082416 | 40.2601451506332 | 46.9354126752815 |
|        | 42.2577689927563 | 51.7941211802143 | 51.0074713041086 | 47.2862299990938 |
| LY6K   | 40.7609952437622 | 46.3635803515159 | 45.7968648044613 | 42.0102671859606 |
|        | 50.5110359971301 | 39.6251842352088 | 46.3057385979341 | 39.0620487644635 |
|        | 53.3094843669564 | 39.4710743516517 | 40.3452320167286 | 41.9430737035925 |

|        |                  |                  |                  |                  |
|--------|------------------|------------------|------------------|------------------|
| LY75   | 35.8208542506595 | 39.0894172982439 | 41.8751578329365 | 41.8778873678551 |
|        | 42.6022652963326 | 39.8455060654531 | 43.8206425661746 | 41.5464765641928 |
|        | 43.7630587657205 | 37.7315666632629 | 34.3633615460307 | 44.6484005362281 |
| LY86   | 113.113062709739 | 79.909124697198  | 63.7744603935682 | 325.172633427119 |
|        | 60.1730663840476 | 113.377818029985 | 78.9900928241723 | 118.600699776727 |
|        | 43.7630587657205 | 61.4569050766419 | 48.2910530887214 | 71.1595608255838 |
| LY9    | 41.3708420203838 | 46.6314009405034 | 45.0017158586743 | 69.113196436009  |
|        | 38.7085700011038 | 41.628211174823  | 37.9905182666856 | 40.8793215723066 |
|        | 37.3111889438957 | 41.800198520267  | 41.4918397757335 | 38.745552403895  |
| LY96   | 530.145843878824 | 158.225884127529 | 174.368595478868 | 1549.93897368117 |
|        | 94.5055588176321 | 344.44626908553  | 146.299417934358 | 219.702703529829 |
|        | 84.4938528830721 | 177.27613997459  | 126.079949368634 | 160.100408020768 |
| LYAR   | 106.433188268142 | 273.540763256424 | 158.01463829244  | 192.536546957155 |
|        | 299.524171071613 | 265.320447667174 | 201.530434441408 | 114.533239859288 |
|        | 181.772001042799 | 106.219480656782 | 124.841811761412 | 146.701131209299 |
| LYCAT  | 128.827672077002 | 124.490684428024 | 118.854313907627 | 65.9703614596867 |
|        | 123.506372870621 | 94.2678678253657 | 150.114520857436 | 262.735075993242 |
|        | 130.925724760241 | 82.1509530759594 | 95.3300728806601 | 108.007227281411 |
| LYG1   | 49.3463416794995 | 40.0527893189096 | 43.401782064778  | 53.8086134112366 |
|        | 52.8190882379316 | 43.5752393599169 | 52.0942589368478 | 46.0633179231318 |
|        | 52.9482338979681 | 52.5522545249206 | 48.2910530887214 | 51.2318935933116 |
| LYG2   | 41.2424637338424 | 42.3550738181144 | 40.301483914446  | 39.1706564265495 |
|        | 40.6723334103791 | 38.5252456306656 | 41.9393838138203 | 36.2539950294089 |
|        | 38.9834959368496 | 33.8984830800739 | 44.7926323492519 | 40.4639532172338 |
| LYL1   | 108.400712514743 | 142.680436288759 | 134.537040608687 | 454.293803256904 |
|        | 114.445779948228 | 249.451753363306 | 103.545764794149 | 141.055218279065 |
|        | 87.036020750455  | 170.560304063093 | 165.42634596698  | 92.4350913779886 |
| LYN    | 680.279119780451 | 432.001201940414 | 347.145902252055 | 2323.81110653289 |
|        | 238.746837986347 | 354.086949676663 | 519.351335801817 | 195.063474879275 |
|        | 250.244199415895 | 112.644426507762 | 149.691911022686 | 177.688415930665 |
| LYNX1  | 38.0698669928229 | 38.2916414828356 | 60.8942621888353 | 36.5219488315447 |
|        | 39.2608760193011 | 41.159706131351  | 40.3662560853635 | 39.1652965788406 |
|        | 36.5675023356094 | 36.87840425987   | 43.8093452203209 | 37.6557714476853 |
| LYPD1  | 56.8534370691413 | 51.8282177617648 | 48.8100349749783 | 45.1151758109609 |
|        | 56.2937283136959 | 44.6524308640784 | 57.7096546601208 | 51.555506218204  |
|        | 51.4413099192899 | 40.848280311228  | 51.9302027391447 | 49.4786466722535 |
| LYPD2  | 40.148780650831  | 57.6831182451733 | 45.7968648044613 | 53.8086134112366 |
|        | 46.4343327861696 | 46.1513019317765 | 42.8684958525042 | 48.1591264215184 |
|        | 51.4413099192899 | 42.6793753550854 | 38.5668610487033 | 44.0451487108213 |
| LYPD3  | 63.200752695983  | 193.468773556057 | 534.292112344761 | 70.7202372217584 |
|        | 83.3905516293346 | 51.9421032049606 | 84.607833108004  | 211.164957509884 |
|        | 273.934014944673 | 280.402165030951 | 122.258194040815 | 109.398472684587 |
| LYPD4  | 43.0930293831497 | 39.9697332660833 | 33.553634633839  | 45.5869891570251 |
|        | 35.9058393060637 | 36.2015763253919 | 38.8417151851134 | 40.4359177791566 |
|        | 39.853866204927  | 39.8873706855774 | 38.745552403895  | 39.5418280570561 |
| LYPD5  | 40.9558083259517 | 47.9128504683618 | 43.7630587657205 | 41.2551966132486 |
|        | 43.0723817756832 | 43.1358833499227 | 50.6774883370457 | 41.467005949568  |
|        | 51.3511088648386 | 41.4659679379482 | 42.7756352650257 | 45.3170039418236 |
| LYPD6  | 50.8388984085636 | 229.547114945412 | 106.679905803492 | 43.1847628331565 |
|        | 72.6675345946258 | 72.6182747525443 | 175.960838580876 | 101.888001006345 |
|        | 115.482982633699 | 94.4129246851651 | 94.9001252449925 | 123.455270940015 |
| LYPLA1 | 61.4416707689893 | 208.22938545273  | 116.596605311488 |                  |
|        | 72.1401612718245 | 119.965950077259 | 62.5542376788358 | 124.599352191013 |

52.5909491535773 81.3544712349691 46.2768056702424 51.413025495745  
 115.342852277396  
 LYPLA2 153.028210322286 259.456935785521 242.503720442197  
 121.204795052893 230.702348443021 111.009050621499 241.952522667413  
 230.649032296928 268.047342640491 161.48562926756 191.730944258418  
 137.52864596636  
 LYPLA2P1 64.546412747238 96.8240908274121 86.9032093551446  
 51.1313686723929 102.980622026276 53.9517841438975 77.2154078285418  
 58.5406981871153 78.3542840447759 50.3388505346542 51.8063005897118  
 57.3697604614404  
 LYPLAL1 116.9812483023 156.770274308736 223.669853276931  
 151.225738885272 140.921774805792 157.658760470424 120.582525405708  
 134.307645598718 146.701131209299 93.9018973330737 99.1952492360239  
 162.833785414988  
 LYRM1 216.976116788572 251.027270265657 261.6201598868 518.936896882424  
 216.1413998895 517.104607715151 308.336693903042 861.427193617946  
 313.763121699885 558.855313555287 379.189486013898 583.237170605534  
 LYRM2 116.685453817071 206.103296228683 246.500690127803 206.610705620712  
 143.251956814524 214.774035015293 143.304938314706 139.436084808369  
 158.613823276652 113.759627906335 141.567299023381 252.487015579489  
 LYRM4 66.6547247910487 65.084620579901 54.6051538001037 51.223859150798  
 79.7808217577226 80.7067505750848 55.4004611309636 59.220967994972  
 96.9051967257119 73.2445837559745 71.4414688202373 78.7496673195407  
 LYRM5 171.974852167092 204.039190380778 200.958421322871 207.540972220982  
 169.804455288603 328.721532812392 181.545493080363 143.399636653204  
 210.485586903711 294.567137562864 228.29142882275 350.451704069255  
 LYSMD1 51.5888395924843 43.7644428186265 45.6989664108554  
 47.9915414951747 52.8190882379316 50.9724155054821 55.5578334877425  
 51.8347877274018 44.2607789091176 55.4037482627222 52.022479439889  
 56.361708620372  
 LYSMD2 104.135574209392 241.08817915181 170.390108862804  
 402.978328664331 242.932905246176 274.689780722548 256.766675299448  
 201.163076338483 255.636379050741 170.420427857495 203.203214597447  
 245.540041661003  
 LYSMD3 39.7576136507593 40.4772513262052 35.6765064335425  
 43.0016969050339 42.4493032770053 39.4953494583071 37.1104431466673  
 41.6916508480321 40.4220196471124 40.8970401536578 37.7384958256497  
 38.0958223740111  
 LYSMD4 86.3458707176254 79.909124697198 70.7760293129408  
 66.9218519793499 87.0414124990547 80.7067505750848 90.807818984128  
 59.5830868881343 91.8414653633828 90.3439862484238 90.9641417408475  
 78.5468300294626  
 LYST 57.2960245538881 47.9128504683618 51.3268475761593 69.4820178305563  
 45.5051950394186 59.8509516999438 45.1679144865704 42.3180724671488  
 53.1786885941943 58.5530199658661 53.2083147523758 54.8325386119165  
 LYVE1 46.8141313516997 48.5905518770847 70.9377012403023 116.295564219236  
 82.6157566292355 1749.06320703181 49.8281348927244 43.7396619462033  
 43.9450023643394 144.835567449189 122.469733727349 476.421959423835  
 LYZ 226.553946570328 873.451893437179 177.65469867262 1330.19215036764  
 61.5841926644385 255.087214364926 80.1461294346211 95.9391851122771  
 52.0228313532986 51.3351387089044 40.723990462047 70.5903356985988  
 LYZL1 43.9518547354262 41.9495387255163 43.1931731665131 44.7401523707775  
 43.4544762830742 43.0144844590744 40.5585676679482 41.4061152929154  
 42.5864346233886 43.781101409552 45.447310733898 43.2177497174408

LYZL2 42.7150227340364 38.6414316877471 40.1985790927248 43.1847628331565  
 48.9627346956003 43.3785777889265 42.629412460409 44.7044140979108  
 45.6582729799009 41.0057887014368 43.401782064778 42.7782216342806  
 LYZL4 38.5007204246293 36.6002100641539 39.1799070031819 44.6905691366696  
 41.8806343997257 41.6590564937735 46.5650556481721 43.6434576713809  
 45.4799270968969 43.7303813515864 43.0971787292711 40.4639532172338  
 LYZL6 45.1912496459517 45.2556760873335 47.2962360458401 45.7397504535169  
 35.0181575202066 40.3357777530419 45.4799270968969 51.3472428383325  
 44.0519245668737 48.7414853386615 42.170702295259 41.1554481567603  
 LZIC 53.3967242431461 65.9098543816057 74.2769881586739 69.3525901554637  
 76.1293960715431 94.2678678253657 74.2690269784394 62.105802634526  
 79.7882961549974 61.5635554619635 78.3542840447759 77.7852875052734  
 LZTFL1 71.1521292570086 80.8285585008048 66.603126065489  
 73.7124988616836 110.009834478125 100.017263238916 103.545764794149  
 67.3976855661302 59.4236178078244 107.348865210074 93.7977486287985  
 96.3918711895208  
 LZTR1 549.117045813593 551.915864019927 714.532923535126 434.37356010024  
 465.595459259015 425.304961783517 312.859454885492 598.404003732481  
 352.292837622545 472.522115719366 527.686970237622 406.668753694984  
 LZTS1 80.5437011468815 60.7495043977707 58.5212649095879 72.2577390063259  
 56.4685270445642 50.8533737532786 44.6032218589199 57.037639245179  
 37.7384958256497 42.8936990772838 46.3370338074996 46.0633179231318  
 LZTS2 70.083473392272 85.5135159896819 70.0059240383657 54.8412943008635  
 81.929796716054 104.80882886573 87.8746766762445 67.6767845246581  
 77.0703146713865 95.5156363110528 88.7928773498158 93.4180535865914  
 M160 228.571334092678 186.002828997122 85.8059456975413 109.851796671234  
 307.419724291399 241.677456498713 87.7107079534841 91.0354017559834  
 111.532958750074 53.0357938671646 48.6767028205398 59.6757573886627  
 M6PR 221.383645621978 453.456591501321 380.098235864256 718.414652618295  
 302.465485470899 278.453446231317 355.319959025243 239.569514501529  
 375.354746298695 135.62451026691 190.053043382767 282.035361446993  
 M6PRBP1 1242.75259587926 971.856840043688 989.0602710707  
 1018.35211991691 1205.82775512007 635.906934423716 680.837950890159  
 510.056072375132 803.548811322583 503.529187388654 510.379313524019  
 769.685677484067  
 MAB21L1 44.2350046179299 40.8880530359822 37.2838080935695  
 37.5382094267692 34.9062568194127 38.5252456306656 38.7337086062875  
 37.6557714476853 36.197424053556 44.0409178714232 43.6629145624937  
 35.2448979801094  
 MAB21L2 42.8036731479932 44.5884811528117 39.5118967430322  
 41.8778873678551 39.1087466732192 41.8613406887824 40.7910160811527  
 43.9604529016594 43.2761454096265 39.8873706855774 40.8225507267584  
 40.3691324547049  
 MACF1 222.985386635178 117.706922397135 98.6706537801886 154.829574442056  
 116.441764463618 187.026092504992 90.6191520659197 114.288115730578  
 197.73829635261 151.99110418225 125.801834682035 168.7696164772  
 MACROD1 66.1229691315616 180.648144492464 168.7696164772  
 40.646702696033 226.057278804077 165.107387190373 200.615897175992  
 247.416016413788 118.619819027443 138.521956104698 187.750540261531  
 129.820909990346  
 MACROD2 38.1713217245067 39.3999056968598 38.3166554965434  
 41.7614975630362 39.2968590261598 38.9661430990729 33.9750800030909  
 38.4128104869434 36.6312676076142 40.7620472083159 40.0766543123257  
 41.7072675309997

MAD1L1 59.7179445506128 78.7282247242035 64.7847448333122  
125.484233748017 82.4164506744 66.5774376622485 100.386011517899  
76.8964050504238 81.0994894489593 74.2379710965903 76.1769573071745  
60.2550788540864  
MAD2L1 72.0334593545916 137.10896135739 70.0955779023465  
63.25187762908 171.722423740869 59.6565330440648 140.264270771578  
94.8092976019795 123.190887747662 45.0864985243943 46.4205654140754  
52.7530873093837  
MAD2L1BP 142.124053129543 114.113460279317 103.961956810572  
98.6706537801886 115.622641633992 96.5287245311078 121.050369804136  
100.234661597218 99.126949393699 78.3186115281795 74.3394153125605  
113.879493668284  
MAD2L2 866.712228831149 380.278389209918 312.19993077414  
513.733739926914 1075.04105984319 550.861615347663 1390.12380748446  
1105.00321488322 536.512119139536 207.245428311682 218.013913036142  
250.41086379231  
MADCAM1 37.7805366040928 41.3277288245157 40.4070046183108  
39.0156305603334 40.1151953732637 43.5416683728269 41.706879587091  
43.7731874801003 39.9444191873552 40.7063426028871 39.3086414047188  
42.6758568421347  
MADD 58.5450868286167 83.17897860584 84.6935029586625 70.1184116246724  
65.0605897122361 68.0501900087917 75.5830548489892 64.5257016285499  
96.577572948724 122.849949163123 105.027318695305 100.891869710611  
MAEA 120.289145237975 268.097966292089 193.649113002244 130.908206625954  
212.688298502868 163.917208464731 178.496935603128 81.1284422173774  
237.237762964658 71.6849360818041 98.1371527802953 107.585504340548  
MAEL 43.3638918705225 38.7578265341627 37.6557714476853 39.7411455670172  
39.1087466732192 43.8308097066396 37.6502409810897 40.188873541274  
39.4762546236449 41.4659679379482 41.6657053704762 44.5432192783161  
MAF 178.4681248137 98.4175422336425 99.2898960399974 158.718808397001  
49.3984571719129 175.114727506747 54.339958888486 56.0496524902806  
51.7289068180135 69.9567689220876 64.1724883992867 53.655233033193  
MAF1 222.66558323175 259.456935785521 118.951970882732 140.662969373546  
195.654315886452 240.887877769007 199.660904693786 113.444217634165  
220.896780388946 212.152751915521 240.55212989103 149.639066617945  
MAFA 61.9504984796308 76.4439037944547 69.5937318502259 80.1809075683154  
57.8039717833131 54.8265655909623 128.542999559673 85.5316122504411  
65.4784797364469 78.6859709780134 68.5370732645926 61.7502624458447  
MAFB 775.931494648677 197.923403667051 330.096171705212 792.022171185649  
123.04622719856 439.106576928682 190.375732394043 139.645717741863  
190.548265163011 148.467977704907 139.204639906937 138.538868572598  
MAFF 65.4045346634146 82.214837116747 58.8328124383881 204.944787289897  
71.9200120168048 98.9560329133205 106.140215438654 130.140604559757  
68.3419511055057 80.4601303882402 100.159565926265 106.20479137406  
MAFG 74.7534423194688 71.599955759893 59.3884552643289 119.872031126474  
71.8394138241546 88.4036642243438 67.8283214323848 79.8844295847317  
54.9631360989325 68.6470173489954 80.3915591207869 71.4197504261453  
MAFK 41.5421429082231 38.6414316877471 39.2707964550441 35.9521941716188  
41.1868052124344 37.1317006162938 33.4316681623175 36.9355798143571  
43.0930293831497 34.4875013487777 37.7384958256497 37.5556299264699  
MAG 37.0320432433314 39.3999056968598 41.785676764591 37.5764485234171  
40.3452320167286 37.9430145836712 43.2721716572958 37.6058760248614  
40.3662560853635 44.3648993568405 37.6862447187338 40.1700117452801

MAGEA1 38.8406533304174 49.83247261979 41.2679739649179  
46.3919862398545 76.7556711670518 45.1873487463472 48.1146464339794  
49.2019743609873 44.2607789091176 41.6373771565199 42.3413611855132  
38.9834959368496

MAGEA10 40.6062943725118 42.8542642792862 41.1742244762318  
42.4580504587581 87.0414124990547 44.1350486752012 40.7910160811527  
39.1128725343972 406.668753694984 38.3501188844251 41.1638563416981  
39.2469742642337

MAGEA11 39.6272321013292 37.9762510584485 40.8420925848403  
38.2041059863839 44.4947794068923 42.2114134935898 39.3999056968598  
41.3945375181463 41.7091809278836 38.6454098044474 39.2010256871265  
40.1130972216246

MAGEA12 43.515290338756 45.3486182278177 44.3344900481112  
46.3203995372658 47.9128504683618 47.3375061488583 45.6706505553383  
44.3521099857368 82.6656197609717 44.3648993568405 46.2560238004757  
48.3913169169846

MAGEA2 38.7270975453573 42.985929467107 41.3366779545815  
42.2496337895968 41.7503755215516 43.3234153488091 43.6753843488695  
40.6171774724171 46.8365561258461 42.9285286409526 41.6724739851995  
44.5432192783161

MAGEA2B 38.385865183581 44.2105195734073 36.769073068743  
41.0726336841311 40.8873907150245 34.1806289878747 43.1931731665131  
40.5158867964016 43.5669306063196 48.7414853386615 37.5583886316038  
45.2783024981315

MAGEA3 44.1294459089314 43.0227387991135 41.7419877611072  
45.8145523469421 39.6535880152834 41.4508241771315 44.0202052410607  
45.642304356051 81.3364476638024 43.4885245598939 43.401782064778  
47.6938628797168

MAGEA4 43.4100411978366 39.5050383901884 43.9243749325976  
47.2009420656854 54.1745577382276 46.3715909653832 42.1607322031054  
41.4061152929154 85.1920126487447 37.6637152940566 39.4410515050885  
41.863927676552

MAGEA5 41.3387790895716 40.8880530359822 42.5406888281114  
39.3750969348308 40.4639532172338 40.8634043028528 47.4439407315335  
46.2779564481158 38.6322728994674 35.7202909649682 41.2598458726002  
41.7575097298927

MAGEA6 43.2028319630577 41.1131693269222 42.0621425894624  
39.6609238036815 43.844855336215 40.0793375723997 41.4397539024976  
41.0920120134247 101.81885073944 39.3260254992968 39.0905363288848  
40.7063426028871

MAGEA8 38.4330755397458 130.048910817957 44.2733573199954  
40.4967168818294 41.9397336249742 40.1428591998404 42.0605906240248  
40.047314525032 39.4433784795209 37.7598032934773 43.6629145624937  
39.3789825717286

MAGEA9 36.5393857306744 44.0409178714232 45.1569741609597  
44.6905691366696 48.6224651100733 43.6670755115848 50.0088611244948  
47.2009420656854 37.10170285405 38.2069499294002 43.0016969050339  
41.5536168238478

MAGEB1 38.528621456378 37.2089297656361 42.5406888281114  
33.2656959979041 39.5317722761104 39.132725377815 36.08956004634  
41.9721968713295 40.5912213523345 39.7397636748413 38.8193634966943  
38.4741160538511

MAGEB10 35.2267149016596 33.8237407699472 41.437237454134  
35.49696651597 41.6806984441849 33.4492509999281 37.2892641289258



37.9837233601316 36.5393857306744 30.6485078361448 37.1059647239814  
32.0636251428594  
MAGEB16 42.3433931248155 41.4508241771315 44.1452943804044  
46.3203995372658 41.467005949568 41.9543948167375 44.7255207589606  
40.2382908228517 46.3203995372658 46.0119912782855 41.1638563416981  
44.9070250604284  
MAGEB18 34.6977013306396 36.6002100641539 37.5597671487621  
37.651298468202 43.7517118200398 47.3791873993182 36.3194282084339  
37.9837233601316 36.9060997041453 37.0320432433314 39.0550139257658  
34.806104801006  
MAGEB2 35.9604262434141 38.1312950900467 38.6414316877471  
36.6062356000449 38.2083710281545 39.0620487644635 36.8369172900902  
35.7973685350741 40.4997186069494 36.9848592422398 39.4410515050885  
37.3600014814388  
MAGEB3 32.0823591288671 38.8336427948187 36.2683886571585  
36.890925044696 41.2740822675592 43.3785777889265 34.3633615460307  
36.1375121409002 36.9060997041453 35.0082729554459 46.5650556481721  
36.449101775775  
MAGEB4 38.5648843914189 42.8542642792862 41.0356368374708  
42.9358255168086 42.269054475455 39.4953494583071 35.4623691645629  
39.9576138799997 42.8036731479932 39.8873706855774 36.43924066428  
38.9496515344837  
MAGEB5 42.8036731479932 45.0115870036541 40.301483914446  
45.7397504535169 42.1650127805175 37.5887129572848 40.6750540874299  
39.4710743516517 42.5406888281114 49.3000844711116 37.0180934800573  
38.9496515344837  
MAGEB6 40.5654775358427 35.9305494063137 40.9818899755491  
43.9282059368202 43.683792219729 39.2248354955045 39.4600924554505  
41.2884376047238 37.8319142847141 40.848280311228 42.2510526338368  
41.6031169661721  
MAGEB6B 44.7915315085948 38.9338521051669 42.4580504587581  
41.6564075217517 42.9090346219023 43.7630587657205 42.4939802311136  
40.6171774724171 39.5806465938526 41.7405682794166 39.7342718293432  
41.5536168238478  
MAGEC1 38.5332184743306 39.1480645318984 41.3366779545815  
39.5050383901884 50.1185085888209 39.2985791324641 39.7264117629268  
39.2248354955045 40.0965255448873 40.7620472083159 41.3082479425828  
39.5748670524951  
MAGEC2 38.5007204246293 39.9697332660833 37.4302011516587  
45.3882138838137 107.094663242259 49.7149784386993 36.1480184924738  
46.7508829977587 39.1467972692656 38.6454098044474 38.7337086062875  
40.4639532172338  
MAGEC3 39.9697332660833 38.486220880314 39.2449843047729  
41.8291484190524 41.0476065156912 40.6959906307191 39.0788811357542  
39.1059888887285 41.1349567921107 40.2718977933691 39.153226699662  
40.5703581862752  
MAGED1 695.255317861845 493.322302312578 376.931257615162  
369.952313383216 380.988918630713 294.220232101389 561.855286945959  
475.310458821086 413.723725202787 269.857104259782 308.025419469334  
275.811139268285  
MAGED2 58.1466894651854 53.4249147153548 67.235655687817  
54.495676004738 48.548215237805 72.961444366037 69.51607174053  
59.3611824459962 59.1777977830588 59.1948983423381 55.4142784938271  
58.5212649095879

MAGED4B 42.0833588105728 44.1239711172417 48.6037684272115  
49.260242314197 52.5645416722441 38.7578265341627 43.1931731665131  
44.9631458622215 44.2142581488029 43.9783383422823 39.8577530602176  
43.4290452504928  
MAGEE1 54.0990839134272 49.6479308322777 46.1653991089885  
45.8844325913247 43.2890595186135 62.7053729334675 70.4794854241035  
64.3284163241986 48.0163377492228 84.9447584832739 74.0831311663524  
70.2680820278385  
MAGEE2 40.7609952437622 41.159706131351 34.3633615460307  
37.29566077996 42.6022652963326 40.8634043028528 43.6753843488695  
43.3262148375525 39.1790517315259 42.4594149893798 39.0550139257658  
39.4490233720848  
MAGEF1 99.6265783263109 80.3676231413295 61.4416707689893  
47.481302504066 117.893268074013 69.64983895075 105.666698877424  
59.4674205670657 73.4122412764173 56.685925255591 65.342842101283  
70.3309641302984  
MAGEH1 51.342502154612 50.5785738734431 45.2313723727673  
50.6346949248834 53.9488501599452 51.4370636595105 46.3057385979341  
52.8622615027833 44.1211971585961 48.7414853386615 54.3554233228353  
50.1725649151836  
MAGEL2 70.3757673501097 54.6793272901524 56.7776874358774  
62.6048727240291 66.5187917407182 64.0985088513857 67.2811786080606  
73.2037966614621 61.3733228199803 75.2053836356882 61.6084234634424  
57.5372732453319  
MAGI1 39.3709357615493 47.2354741623061 41.785676764591 40.1804147506786  
40.7779767565889 36.1591179295242 40.7910160811527 43.3925093042325  
42.9454180086838 42.785429206422 41.9908237694988 47.1060577218993  
MAGI2 31.1150868775826 39.6123051184545 44.0451487108213 36.9912468186322  
51.5888395924843 44.1737502492846 36.5352572191451 39.6474008369935  
41.5635499110307 42.2614524730856 32.775958132716 32.8921051249019  
MAGI3 35.5179217192467 43.1805016690297 40.301483914446 41.1507980856436  
39.4693871570028 40.7616966228404 41.4742337714895 42.8936990772838  
41.3803269429468 42.785429206422 40.3180310664156 35.3525469364579  
Magmas 434.523449093691 585.421238639853 482.238595345574  
293.516547661658 593.801086643125 445.644244692294 628.84789420227  
266.687281047486 518.074074000609 451.979764914543 491.468862309918  
382.050584680669  
MAGOH 198.754967214875 144.954155897343 125.794379028627 159.12163104195  
219.186221756668 159.554916039519 181.966839676473 170.048690747909  
212.822978676596 114.617965877564 119.691133736693 150.242221910229  
MAGOHB 42.8036731479932 50.2163892855092 46.2625470410195  
41.6564075217517 46.8674366115656 44.6524308640784 48.9826868640753  
50.3082459161777 55.5751438859404 39.3698811593364 42.170702295259  
43.3744503319109  
MAGT1 2306.14613042834 681.156163097495 932.849256536912 1269.36837611919  
848.079114196986 805.87120346756 1398.21942794938 4058.32430616734  
828.403901345618 3966.51586153125 5112.4354472796 3761.48462220262  
MAK 47.2862299990938 43.6587492470348 43.1931731665131 44.0991023527481  
41.0476065156912 42.0574848021044 40.7376840028647 42.6913548400127  
44.8003345643334 44.4294261786154 40.547835538778 43.2776458914333  
MAK10 66.5141009463313 68.878562323012 52.1062000766427 60.620259884953  
74.8013460023603 68.1311562787361 70.0567634568557 56.5914743235484  
65.6876778328592 57.0198225543234 58.4087124582106 64.2769859135548

|        |                  |                  |                  |                  |
|--------|------------------|------------------|------------------|------------------|
| MAK16  | 87.069143362676  | 74.4696354388511 | 102.330999847292 | 78.7450149191851 |
|        | 79.3889841821749 | 125.184689092836 | 109.456162739433 | 117.369735504926 |
|        | 83.4465817617201 | 88.7461361855771 | 107.741669334989 | 113.277043026153 |
| MAL    | 44.2718517563299 | 1048.98028527123 | 532.35007819883  | 67.7121534934164 |
|        | 344.133384411423 | 103.913834330352 | 72.2099571536717 | 76.1493261430901 |
|        | 64.2690842803282 | 66.8693882433359 | 90.807818984128  | 48.0080291106034 |
| MAL2   | 508.081726674689 | 1330.19215036764 | 604.357590751951 | 46.4555908533915 |
|        | 751.953794043451 | 147.357697217619 | 388.920739791844 | 255.284866561352 |
|        | 958.473187253938 | 118.32905874786  | 208.67074469962  | 317.777971035617 |
| MALAT1 | 37.6397652536077 | 44.5884811528117 | 42.157627240486  |                  |
|        | 40.3180310664156 | 40.9950639693255 | 39.7394181011603 | 37.0564573649223 |
|        | 40.047314525032  | 42.6366765186182 | 37.6383530120621 | 38.5668610487033 |
|        | 39.3575468494941 |                  |                  |                  |
| MALL   | 477.023373302787 | 562.531738167208 | 722.862413305704 | 202.872083191114 |
|        | 108.063001800611 | 157.334378544568 | 95.3754438202863 | 306.037739986164 |
|        | 1032.44965920118 | 242.016748817428 | 411.184636774653 | 233.850715388018 |
| MALT1  | 51.0724630072723 | 50.5110359971301 | 47.7737810047679 | 92.1455386560941 |
|        | 52.8190882379316 | 53.0563786095807 | 59.4431489877328 | 56.1838945110653 |
|        | 74.5694657001572 | 62.4530276414691 | 53.6895401581575 | 61.2441059007934 |
| MAMDC2 | 57.4376528157926 | 55.2893984191264 | 75.8201286658785 |                  |
|        | 54.8412943008635 | 40.9950639693255 | 630.53864514662  | 64.7023558190673 |
|        | 48.4670130605028 | 63.5195937348531 | 276.029709051798 | 314.006301513986 |
|        | 398.229956085523 |                  |                  |                  |
| MAMDC4 | 65.2001674269291 | 117.556281726503 | 55.094385444315  |                  |
|        | 53.0284011078097 | 43.9450023643394 | 48.6621527194963 | 56.4809146784765 |
|        | 44.7044140979108 | 54.7033747046992 | 49.0841460667818 | 55.6972661824064 |
|        | 53.9431600945419 |                  |                  |                  |
| MAML1  | 63.5222607845861 | 53.9511419563122 | 53.5698357689852 | 55.4180794172794 |
|        | 59.9326265577462 | 65.9350437838896 | 60.0429887370894 | 51.2623287419357 |
|        | 63.9148277361329 | 55.0604256312495 | 60.5390917151449 | 55.2998422481855 |
| MAML2  | 46.7293238583888 | 47.087835967892  | 48.6037684272115 | 59.6153684374766 |
|        | 62.6860949544223 | 48.0350549043063 | 55.9276266345493 | 39.5466975353131 |
|        | 44.1519466943185 | 44.4652605017595 | 42.170702295259  | 52.5752569429057 |
| MAML3  | 33.9561816279577 | 44.7829632472754 | 39.6451483836089 | 33.9645433044281 |
|        | 37.7576900881741 | 37.0180934800573 | 42.4939802311136 | 34.2814697823693 |
|        | 40.8970401536578 | 41.4397539024976 | 40.2649309204478 | 37.8490162439785 |
| MAMLD1 | 44.6231541342    | 43.7644428186265 | 41.9666541498638 |                  |
|        | 64.3746985855249 | 38.3561682218911 | 51.8103411703261 | 43.5627649099623 |
|        | 53.7378346199838 | 41.3803269429468 | 40.2112371512838 | 47.9942520395434 |
|        | 43.8575940017119 |                  |                  |                  |
| MAN1A1 | 157.658760470424 | 90.9570747667407 | 104.557637353314 |                  |
|        | 148.871702513875 | 94.6432868887401 | 99.0731740277519 | 118.619819027443 |
|        | 83.5767232665142 | 105.140085606412 | 99.3956523785983 | 90.0223113095186 |
|        | 113.853553531089 |                  |                  |                  |
| MAN1A2 | 54.8845696432531 | 61.8824218975538 | 55.3275365686503 |                  |
|        | 60.7741670229412 | 69.1862663389904 | 56.6871913719063 | 51.2318935933116 |
|        | 65.0102534173543 | 67.5047089908724 | 55.729415084877  | 56.9628808664342 |
|        | 56.0477607422828 |                  |                  |                  |
| MAN1B1 | 581.396808977873 | 384.080719411412 | 288.065258507995 |                  |
|        | 291.486402879057 | 408.739953606815 | 218.773587021224 | 422.474427987338 |
|        | 352.843053667822 | 254.322611819303 | 372.239177888445 | 362.853023741815 |
|        | 194.252076513619 |                  |                  |                  |
| MAN1C1 | 207.087723777954 | 587.385368995676 | 55.6865353018811 |                  |
|        | 87.4850071876743 | 375.529704925121 | 257.711912004    | 132.903804194161 |

539.471011648536 335.655540947167 89.3011777476649 108.945545005203  
 89.2832797334932  
 MAN2A1 106.620429405618 85.2598847559951 90.0288824434037  
 107.478392667404 71.9737561190706 83.2925226467532 71.193768715137  
 169.500205172068 99.0202948657926 153.626578526803 126.485649460666  
 116.953646515589  
 MAN2A2 60.0793579902362 65.3694267397114 54.0536858212253  
 79.5838979704243 52.6922486991742 56.2736599756843 57.2758638871082  
 45.5581356216957 55.1253465069845 65.2361525412756 50.3221380889396  
 58.0218262176065  
 MAN2B1 147.033637977077 193.468773556057 211.685526927495  
 350.106705208362 196.709620264975 145.439350995461 134.335592890814  
 121.945468001236 95.4942268742467 165.797721197832 104.626873082138  
 100.289042948128  
 MAN2B2 165.548537317115 107.748050894857 142.840631375936  
 144.813029178278 96.0418367475772 136.103246130094 61.8571521441451  
 173.582309251499 169.838827072973 216.004059887037 197.515728627482  
 162.908986027874  
 MAN2C1 252.061166074743 196.735144093998 248.194954741095  
 164.176142753482 225.389113475883 161.910748720932 183.887843429281  
 164.122105098254 162.895543924742 252.82316545981 311.585488207444  
 179.342338803631  
 MANBA 287.363928615517 126.69706456173 302.50850157207 328.46798329618  
 155.855834721836 180.502282381416 121.945468001236 202.708232693973  
 262.024495926094 198.742148437738 160.868571611805 209.551557135809  
 MANBAL 313.763121699885 217.456127221867 234.873589896708  
 166.983092667334 199.937572174194 300.560071753181 386.170232791927  
 217.976796656266 372.758184542037 474.729653426958 359.940393399742  
 366.129480083279  
 MANEA 41.3727701466755 52.403135056701 52.0299937917925 50.133362781069  
 46.0408479817424 47.5733603903505 43.9019668459994 44.4467542540955  
 50.3777989617881 49.452985143568 51.9545473262296 57.1863195337055  
 MANEAL 45.7802253890958 44.1519466943185 41.2747736315207  
 38.0486674716976 71.1163541406788 40.9043306643373 38.5442780220289  
 42.1887890806988 42.0194325009671 38.0605264668229 39.3667161654772  
 36.449101775775  
 MANSC1 63.2753814090696 178.422506138888 176.653849515825  
 64.3746985855249 168.11088055793 92.7667038784226 130.211586013657  
 84.4349803529132 163.995560004001 85.4635831413678 89.7919042996685  
 120.392561825049  
 MAOA 200.144817111902 929.862002014478 1664.00821059181 135.436347750159  
 541.105845300009 968.405745860353 2002.0536042686 747.577738135496  
 1921.48678333837 2357.96534075689 2745.8277126123 2456.86796652313  
 MAOB 40.8681871019812 48.4980626712175 39.4710743516517 45.334106390212  
 35.9894133432376 125.364451149941 46.4388841354122 39.2672712041774  
 41.7627910693483 85.5439309325541 77.0226403968683 61.7502624458447  
 MAP1A 132.93879018892 66.3026572113793 67.235655687817 112.585860083115  
 74.8013460023603 230.879083362388 73.8313212063649 85.5316122504411  
 60.6266092582071 259.958369064691 157.493875535302 106.70211644918  
 MAP1B 56.4729864553319 55.1253465069845 61.3973540098375 68.7227011958449  
 56.359578588344 181.705809767061 51.2207153770095 49.8344973836834  
 46.0106098064475 73.0394191668858 91.1363393944977 92.1646038105091

MAP1D 45.3872406432794 35.3307157989724 34.3633615460307 34.5425384901279  
40.148780650831 37.4782441311626 40.6750540874299 35.7973685350741  
39.2809305246091 36.0481934423077 39.6403089864678 35.8429598823818  
MAP1LC3A 178.961579489906 360.15483218921 273.460165751162  
231.060688044554 306.895449954881 512.951288394692 389.248080358801  
421.611594456877 66.9260611060819 211.109957714241 290.761706869722  
205.24499293304  
MAP1LC3B 226.456072107079 379.473739290565 338.72596574658  
577.276184555955 188.670053901101 389.481124074714 295.25359816523  
228.809697062726 202.751918610777 269.492542909259 242.546821017091  
299.524171071613  
MAP1LC3C 45.3872406432794 40.6380495994768 44.8872784170036  
42.6913548400127 41.2740822675592 46.1513019317765 42.0605906240248  
41.6466169548846 46.9739160257217 49.6203214143464 46.2560238004757  
50.379587451669  
MAP1S 142.309369995384 123.039116845742 134.185571685143 189.650905999631  
157.927114480316 137.551493752877 158.195749606017 153.736638194572  
178.188675055821 133.192618821838 121.354667375673 92.6545309624315  
MAP2 40.7084119829585 40.9291911731327 42.1854190347767 42.281606728072  
37.7576900881741 38.4330755397458 41.1742244762318 40.1047531921147  
41.3803269429468 39.3113207075992 40.8225507267584 42.6322698334662  
MAP2K1 268.144525192544 281.602712448925 199.970127219451  
612.843402058384 367.451332073134 231.110382348467 345.811673759417  
217.293240552946 334.349204174886 137.484063876244 136.250317107253  
263.096895937991  
MAP2K1IP1 254.756894822368 247.723546145775 290.761706869722  
633.385474385877 197.070092523652 284.66531382201 260.766438659762  
238.246319539302 310.188313944313 256.071638089438 335.881117053472  
457.860665614779  
MAP2K2 499.356036793973 449.427251674566 609.797179957996  
506.173054520807 932.849256536912 537.213035625492 549.407911286514  
610.149769483374 651.621028098039 663.372296297652 680.837950890159  
351.239677010973  
MAP2K3 56.233217375698 63.9110569727542 57.8111054584154  
88.4897895318663 64.8254097948745 52.1242102345408 66.9494774452406  
77.9287386697519 58.8700900181234 57.417423497971 56.6188723715434  
60.7193676776237  
MAP2K4 83.0959169307948 106.521012342668 99.3448096967314  
91.5202521578181 87.0414124990547 95.7639712596394 101.002303802745  
101.681822254799 89.646647563364 126.389908470189 130.177232923004  
114.437872597779  
MAP2K5 64.9890714157316 62.2483694996823 53.2046867327331  
62.6903000204009 61.9944005465335 76.153346954349 76.4889974392545  
72.3205705562527 76.6571453659046 86.8113410380324 82.0869179287671  
70.0907269565408  
MAP2K6 41.0844534776541 46.8059596594267 38.7429005059745  
41.0057887014368 42.7982502551634 40.6994262313917 42.0016830644258  
41.7822161551364 43.8482802038826 35.3362091871364 38.5668610487033  
38.5279745308203  
MAP2K7 71.9062462001972 58.7460488758053 59.9690744676539  
58.1798515131249 67.6011992144113 59.1570467228834 66.9239565096247  
57.2350830635912 70.4262478188233 78.3851687801705 81.5678694264684  
56.8534370691413

MAP3K1 242.673166257518 100.671408579579 95.5022104475922  
378.12777235743 81.2359429678503 147.945429978177 118.619819027443  
198.226275659825 163.126491735808 284.868613843826 212.219384864571  
138.210524893279

MAP3K10 38.2083710281545 37.8217989841918 38.1421709520616  
37.9875302985336 30.422292833952 36.2768299545794 33.4316681623175  
38.3684202018524 40.9901805728485 48.7414853386615 35.6970528713709  
36.3454320848591

MAP3K11 175.362103430164 190.130724966304 110.849159638833  
189.289063944393 166.652850759559 125.503897988367 273.231509963261  
254.322611819303 168.326515533208 174.179617483251 144.427680369554  
113.491158368594

MAP3K12 44.9896851005259 48.109747794187 41.785676764591  
44.1483976313959 35.1411239266238 53.1052228246467 34.4570158133896  
44.1311654985682 38.0213051227859 47.611018474151 44.6286581923295  
43.0930293831497

MAP3K13 47.2862299990938 39.2907645923217 44.7829632472754  
46.3203995372658 38.5512429290626 45.9266745571724 46.0228732507872  
42.9301944191913 47.1744296124496 59.6863210839828 49.8393069675192  
47.0130468198828

MAP3K14 51.5888395924843 52.0268699306396 52.6275131390249  
65.084620579901 54.3116862772198 63.4610447573417 69.9214859673839  
62.9922928277769 66.0350709576651 55.9283039581662 63.4323398447015  
54.293880614303

MAP3K15 39.7576136507593 43.683792219729 41.6079958749402  
41.7614975630362 41.6806984441849 42.0574848021044 37.6036146841933  
41.7419877611072 47.7086093893038 39.8873706855774 39.5399188536544  
41.7575097298927

MAP3K2 62.358854072801 67.7189686993694 57.7865070833351  
95.5022104475922 58.8188963227059 60.4991141099239 61.6544855697851  
73.0394191668858 63.2409684531772 74.2379710965903 83.8811735017279  
78.7103847663605

MAP3K3 56.7776874358774 51.7495306734657 60.7985356140269  
80.8078050043929 59.4830424460714 84.7816603427127 59.9174456081704  
50.7364620410977 55.0748878261048 62.2878942799819 61.5000955267432  
64.2164483533411

MAP3K4 143.6667863386 129.820909990346 152.031470139119  
136.04447103201 107.906865732219 149.5664106654 114.363816429963  
110.191860661108 134.085457101528 235.222472959869 206.031918669687  
148.570371099987

MAP3K5 95.1513370156467 126.911056987607 165.613176704286  
137.335224748204 89.8035133597498 75.5561597374812 111.714563124738  
111.153589230866 71.1894129030602 124.22494803053 190.375732394043  
176.936216428226

MAP3K6 228.054565950253 173.603999265239 297.701126167694  
159.618353114269 155.378768637562 266.702252514277 132.903804194161  
149.260740603715 272.475108279834 214.562221385406 204.009492151839  
233.263058459431

MAP3K7 90.3188163079532 114.41703170676 143.122201568705  
150.009352890706 86.4898752526885 123.978615472736 94.6130003107132  
147.115466503902 106.165518810891 129.697400781396 137.302487233881  
144.427680369554

MAP3K7IP1 63.3717459766798 69.2582988646396 59.3884552643289  
53.593974682612 62.9952378379206 64.9498081060676 89.1910625491447

64.3942941755251 73.8251606025227 81.1416376689959 74.6159297822533  
60.7000614972772  
MAP3K7IP2 44.5282181324797 44.2630383225933 45.3675390992851  
40.8084239472012 42.6022652963326 46.6397391251762 48.0283573444179  
44.797320243931 46.8873421271259 44.2580151149956 46.1390887492649  
46.201352759435  
MAP3K7IP3 46.8141313516997 46.1569135229922 46.7058093820839  
44.550322123994 44.6834648302383 43.4681646416585 48.4099370357307  
48.3590401011623 43.0930293831497 45.2556760873335 46.5952288260503  
42.1860813954352  
MAP3K8 142.840631375936 202.494545985006 107.792406701643  
398.332925006466 121.552188287725 253.683753201667 189.516455814322  
291.159547880488 126.156748063621 67.4760456862775 64.2174369755376  
98.3142231283069  
MAP3K9 51.7607563002005 47.8400694856726 41.0356368374708  
38.3166554965434 39.9697332660833 40.040778349137 43.3262148375525  
46.695848687694 45.5779686360641 46.0119912782855 48.3847843498476  
50.1579724208315  
MAP4 42.8482181313226 44.8969632710144 44.8872784170036 44.2222841572272  
43.6880562748566 39.0648733099061 46.794716003113 43.4929629847322  
44.3440839686558 38.3092241935352 44.8385309082825 43.7672102682067  
MAP4K1 63.4427357028556 93.461049073831 87.6178717341967  
181.950503247343 46.3607182640185 54.9108046955355 46.0817481577316  
59.5080588072694 51.0062122023297 47.3010040326346 57.7155177133893  
49.3654837541353  
MAP4K2 214.823948126294 432.945510073269 399.027079798213  
338.000998124097 1083.50383916482 294.51382100172 556.417356025042  
451.437791473506 292.600202149564 182.246578375636 205.121208974511  
164.780216383719  
MAP4K3 92.9323002425821 134.300169542594 119.124583755587  
57.0629653735694 74.9113162056974 86.503774181307 67.6767845246581  
66.8364940429355 87.036020750455 50.22432299342 66.274247400793  
81.0169370911764  
MAP4K4 119.660151314176 72.1401612718245 89.7806631815779  
131.141908315555 89.2751674264718 132.87656143652 77.4046818339539  
86.4154945670734 85.9749634505846 67.7626103902954 65.3933030211114  
70.9377012403023  
MAP4K5 112.271215367578 109.844156801015 73.7133884699889  
83.6438735616921 90.0942781313264 93.7924763988692 110.048921728774  
152.679927202674 94.5716601751149 159.485978728 116.461730749198  
122.720768249799  
MAP6 37.9661004970253 43.6601381712644 42.0164252051496 42.0636939252645  
41.3331561144087 47.6803619768589 41.6550823405646 46.2231598401576  
40.8351751854504 50.3863137257348 44.5851823170508 43.6285248402465  
MAP6D1 101.002303802745 89.3342384381684 79.6675791471526  
57.6511495792664 165.522304431988 86.7776945455037 174.368595478868  
111.153589230866 88.7605288058249 75.3333024462557 77.0226403968683  
70.5322939116406  
MAP7 225.875798191473 330.892010103508 344.887504955742 53.8086134112366  
143.639231185825 70.5025097213784 188.099292617901 199.858233616116  
174.815922224726 134.152059562322 170.172720177618 202.395470754957  
MAP7D2 68.8698243753339 41.3610369241157 41.0356368374708  
35.7674462337723 63.955655956484 39.6251842352088 42.1607322031054

36.1375121409002 45.3756389170606 38.957687788868 38.956280281655  
 38.6454098044474  
 MAP7D3 46.8141313516997 43.1805016690297 45.1569741609597  
 45.7397504535169 46.4343327861696 51.1621379498014 39.5496902678788  
 41.0381860307445 42.8036731479932 40.8970401536578 47.7535797917441  
 45.3763275588341  
 MAP9 37.55264801907 40.9731067463382 41.8751578329365 37.9875302985336  
 41.7929491793697 37.8102105794655 38.6243997507646 49.2019743609873  
 42.9020321355927 51.1169368198437 40.4504608195666 41.1554481567603  
 MAPBPIP 617.808073077341 384.624816045174 455.223217772744  
 423.43141595962 567.086112633487 327.193250073326 548.387793019855  
 380.278389209918 445.307046237791 254.023393889525 260.405228196514  
 458.230500859847  
 MAPK1 76.8713035584472 95.4252587480277 103.513421757522 160.283895105835  
 84.9280683258012 82.291097567232 108.007227281411 82.6602736441839  
 113.546568515215 74.3187437598836 75.1246064433857 82.97559574338  
 MAPK10 65.6838603798025 94.5788538659874 156.95090716929  
 48.0747155717649 54.3659493975064 76.0709828871754 70.6467150815052  
 81.5966838909987 79.5488891958168 78.1275793755619 75.7666827480067  
 68.8195659637992  
 MAPK11 62.9672234302539 47.9128504683618 48.6037684272115  
 55.32276041402 56.5094373275922 49.0361180089431 37.4772922422734  
 56.4261120978333 45.4143854024453 42.6366765186182 49.3901004211918  
 44.696023817801  
 MAPK12 42.2455707947223 45.0115870036541 43.7630587657205  
 41.1886975241176 52.4370718282084 50.9724155054821 36.08956004634  
 44.0390019242862 40.6957787921451 33.2987269789328 41.8168470823451  
 36.3454320848591  
 MAPK13 1043.26325848938 1468.75291542154 1068.10627239579  
 384.727543700024 887.118866402149 169.804455288603 829.152040996817  
 390.489537450621 913.704049709264 454.185408362583 419.563859911367  
 443.863346367342  
 MAPK14 52.9849979441253 52.153603364404 54.9944485073259  
 53.7155925246916 57.1935729219207 57.2960245538881 56.410923639913  
 49.1525891206136 50.8150847692408 44.95701484183 44.1472341934505  
 51.0013344286851  
 MAPK15 51.8781065691038 48.4980626712175 49.5424425850549  
 40.8681871019812 79.5175547131776 44.1737502492846 38.5066108855005  
 49.2901038327894 48.3119523820103 44.3648993568405 43.0971787292711  
 43.9541718254769  
 MAPK3 389.994289973076 281.07879968121 408.991719312986 348.964065997095  
 330.391945158969 534.881442644054 340.429325650126 711.773459577386  
 229.035497774884 501.817654561915 549.67905283016 328.387270297393  
 MAPK4 46.29198852834 51.6527806785838 47.646800205189 43.2504382247503  
 44.7210190486327 62.6328512719486 43.9450023643394 47.6397712007919  
 46.6944238390932 52.8928296360463 59.8273072817267 50.0991178780329  
 MAPK6 280.820745089796 290.031202636467 197.720854621428 283.161835288074  
 419.360641528378 245.0324923457 485.698327133705 299.524171071613  
 690.568858101531 454.820452764822 397.520960156896 484.651969259966  
 MAPK7 100.370937669662 69.640968387662 66.3230625217466 76.450993090133  
 56.5225014032155 78.4590546118913 129.613152757362 55.0334479749824  
 60.6706478075023 85.4875375805171 75.3969721155153 65.6758681071214



MAPK8 43.7920955808549 46.6314009405034 41.528370959196 44.7401523707775  
40.0599807618105 42.2114134935898 42.8684958525042 41.2098211956301  
41.7627910693483 41.2276963324981 46.4753015651202 44.3521099857368  
MAPK8IP1 42.3433931248155 41.2598458726002 42.157627240486  
41.6564075217517 47.3172462673426 52.5330333302271 44.0687697278114  
44.797320243931 42.8036731479932 48.0211752672327 48.6184776976167  
45.1735152121056  
MAPK8IP2 45.0283997415478 40.401013836372 40.1579072897121  
39.0156305603334 43.5544347011646 41.0080442091679 38.237657348649  
41.5783566611007 40.7847110517594 40.7704587752083 41.2598458726002  
39.6682560919759  
MAPK8IP3 125.044670102036 163.360824752796 234.113622230498  
114.288115730578 160.336517310154 80.7067505750848 107.148000219752  
96.1514672581462 113.7763650775 210.282066967005 190.592556065939  
166.304210248623  
MAPK9 107.637618676176 91.6777754418002 119.333788465158 110.540953771795  
110.287699369482 121.831344781285 92.5391033814713 106.292775688671  
99.9896394343368 82.4164506744 101.773569535303 115.544036763985  
MAPKAP1 117.556281726503 102.348306329887 77.0927030014721  
112.817389187023 85.9179359178373 117.732966326465 119.609614885616  
104.650071846586 101.888001006345 70.3117160953476 80.7563265626648  
93.2688173550974  
MAPKAPK2 60.394307846869 57.2871072823547 53.1491634301682  
102.365615739399 52.8190882379316 57.1347479521219 58.0969258817391  
65.7536901239228 56.3737927112624 57.7805922926828 52.5586058896479  
55.6351010690528  
MAPKAPK3 220.03226547675 381.426926151034 329.120125961774  
660.295993198711 534.460534486887 274.689780722548 280.075938355178  
211.868223638158 381.533380474563 280.075938355178 179.552011806692  
244.389359320438  
MAPKAPK5 141.364814429951 131.277614500948 128.146059846414  
115.299308625328 168.345356470411 112.17141283151 158.918242816842  
99.5192591352063 156.174166381986 97.3870880869036 96.6610775982571  
118.696127260286  
MAPKBP1 62.6702927225656 64.8903340853337 51.8122261766744  
53.9517841438975 71.4183281327686 86.7776945455037 78.0020909283414  
75.7947206223934 58.5561424827901 78.3186115281795 91.036114822363  
54.4313108506244  
MAPRE1 777.854349637516 868.899376368472 735.60603239712  
863.082385199922 1115.27580736237 1226.43929953115 1196.18785007729  
695.255317861845 610.853753376105 729.342532316666 904.487756674518  
1047.33749100342  
MAPRE2 243.403622361932 176.224645007435 170.450752247109  
388.831358461844 124.903031106573 626.749986744506 98.8657527308305  
205.672652429972 189.245501343165 262.9072085191 231.637751095711  
232.815747390118  
MAPRE3 133.823107212467 61.9459245072385 105.923542213588  
97.8309399470621 123.261654256925 157.7623351008 86.4898752526885  
197.776069056927 105.914573205761 243.640796499438 241.175454742029  
193.01447006167  
MAPT 42.9582729416601 39.6995529770239 43.4544762830742 41.6045220683604  
39.118426249677 54.1941919612524 40.0676341303791 42.0964077090013  
46.1101825640108 72.7071934110997 79.7020636215451 58.7722169145704

MARCH1 43.4626049853157 42.5269793679335 41.6079958749402  
55.32276041402 43.9450023643394 48.1997158668729 43.0269218496197  
43.8694505312625 45.5779686360641 43.1839109702714 39.9586075662602  
43.6753843488695  
MARCH2 80.1809075683154 65.4493288628375 65.5820437889838  
104.672760332135 74.4851052263387 128.356485935893 58.8213079710587  
65.854213724711 58.112348043634 98.4636016442768 80.7986033188909  
77.2723439033535  
MARCH3 56.6537562775715 60.6678908594942 155.795095438102  
72.8294672035715 57.6791750431251 135.782043043499 50.4430599873056  
54.8412943008635 66.7008819035152 58.8361533901971 59.2106652388061  
91.8251275769679  
MARCH4 40.9558083259517 42.0709558258414 37.5597671487621  
36.0481934423077 38.6454098044474 35.8227939208521 39.0458123429605  
42.9301944191913 38.8271346375425 39.7835513496873 32.406093465115  
32.8921051249019  
MARCH5 52.502055890816 73.1107343633971 48.0654860391912  
47.0874209746031 54.2683296643972 54.0382756991549 65.1496567852393  
51.555506218204 62.6386437936516 59.2012779686869 64.7023558190673  
56.5914743235484  
MARCH6 343.591727067749 248.645558594929 267.523307072523  
474.729653426958 232.553783060082 508.688028777582 1009.47177197543  
696.946621824188 173.891042920642 932.849256536912 1115.27580736237  
475.75173151481  
MARCH7 435.901460958456 570.204236909398 575.863848923457  
644.733901442573 549.67905283016 532.35007819883 410.716248834784  
601.611039798626 422.474427987338 442.080188140864 443.581460031166  
467.884559162462  
MARCH8 40.148780650831 41.0183489151839 37.7024283210473  
46.2410794644651 37.491503408018 40.4715535328338 42.0081188808926  
39.2256660814316 39.3448007981232 42.3451477320784 41.0468299005176  
39.8808072026699  
MARCH9 44.7044140979108 47.087835967892 44.4311655729487  
48.665578118898 42.6022652963326 47.6803619768589 43.5627649099623  
44.4031868028216 52.9482338979681 48.7414853386615 46.1673159982664  
40.3691324547049  
MARCKS 3088.44063817936 2113.73880184695 1686.40194722823  
2039.89728774097 1250.15619347362 998.311134235214 2133.78836857697  
2697.96877833185 1718.44944271916 1152.55315876935 1440.41726370246  
2196.59044510709  
MARCKSL1 1134.52018899688 1405.20888023653 691.132727131746  
496.444080712528 1780.14552702126 272.545033107746 2678.43227619157  
1738.00955642263 1519.01001038342 312.795596385258 449.701353531924  
299.334388262225  
MARCO 53.2046867327331 39.5050383901884 59.1040441894478 749.49934348018  
44.5668141895992 96.2490896573253 68.673864919178 45.4757965005055  
42.357910063876 43.2988017098387 47.299647867533 96.9944911507111  
MARK1 48.7646976789783 152.824869071575 113.82565808481 45.5869891570251  
90.385018479478 77.7481370715949 67.2811786080606 66.0303950772736  
82.966263655525 174.303754116679 111.320157744612 98.5339473137891  
MARK2 57.5633736951174 86.5616422570166 58.8394945317295 55.1149136190465  
99.2662616001616 57.0432936275418 98.9397912793266 110.048921728774  
61.4467162706417 53.5498255316009 64.6111899743678 58.2251348002272

|          |                  |                  |                  |                  |
|----------|------------------|------------------|------------------|------------------|
| MARK3    | 130.703767898434 | 92.7667038784226 | 101.804757613639 | 111.347228208501 |
|          | 111.501058276821 | 103.734064904898 | 104.932630862885 | 125.013317684129 |
|          | 147.405190988088 | 106.527144354592 | 98.4699679900651 | 111.166893747402 |
| MARK4    | 37.8386378737561 | 40.2493681589104 | 33.553634633839  | 37.29566077996   |
|          | 39.5595233162192 | 39.4953494583071 | 40.0052661202207 | 42.4580504587581 |
|          | 36.9060997041453 | 39.4710743516517 | 34.9428206949566 | 41.1554481567603 |
| MARLIN1  | 40.148780650831  | 41.4287136856347 | 38.8403878304539 |                  |
|          | 38.5252456306656 | 41.0448919024758 | 38.1807717786389 | 43.2776458914333 |
|          | 44.0390019242862 | 41.074824727477  | 41.162473449625  | 42.911855821602  |
|          | 45.3205181880004 |                  |                  |                  |
| MARS     | 96.4033477961156 | 100.774098314706 | 103.924331701312 | 131.141908315555 |
|          | 107.294098632695 | 107.646103699516 | 109.901105821696 | 157.9970294734   |
|          | 138.910687241655 | 85.5439309325541 | 115.496195377983 | 97.7140868175135 |
| MARS2    | 48.4849194706125 | 60.0105984819248 | 72.5835488194631 | 42.281606728072  |
|          | 85.0852996855365 | 49.9256753636167 | 46.7800033479223 | 46.9454141780379 |
|          | 58.6736679311765 | 43.6033221838149 | 49.5923712603197 | 53.655233033193  |
| MARVELD2 | 53.9612654850046 | 70.2553917409773 | 59.7009992986607 |                  |
|          | 37.5996339040239 | 63.7564526024479 | 43.0234331454243 | 47.5309279774832 |
|          | 65.8703820581684 | 85.7688374578353 | 67.1675878355908 | 64.2551943403496 |
|          | 65.3121096212536 |                  |                  |                  |
| MARVELD3 | 132.730723037077 | 93.5665536754775 | 89.8354888041611 |                  |
|          | 44.622459983127  | 70.9319024596628 | 43.0234331454243 | 138.568626520133 |
|          | 125.383837024985 | 121.562769658314 | 63.8273035273651 | 63.0043412964216 |
|          | 75.9136854087044 |                  |                  |                  |
| MAS1     | 38.0089018744739 | 45.0115870036541 | 42.8270038153139 | 40.9607305725196 |
|          | 47.9128504683618 | 37.7000400506818 | 43.5627649099623 | 45.642304356051  |
|          | 43.9450023643394 | 42.8936990772838 | 36.9060997041453 | 36.7762265039864 |
| MAS1L    | 39.9697332660833 | 36.5219488315447 | 36.9795961564828 | 42.5664883002833 |
|          | 41.7929491793697 | 40.040778349137  | 39.7576136507593 | 41.1575777497576 |
|          | 42.4540072551568 | 43.4885245598939 | 40.8225507267584 | 43.4709415392696 |
| MASP1    | 40.3478825593224 | 39.4693871570028 | 40.0478450549299 | 43.4894572796459 |
|          | 42.5602792990883 | 50.2931656908095 | 39.4102279045485 | 41.2551966132486 |
|          | 41.4636047919453 | 43.9869272640159 | 43.3085358214154 | 41.2437378488025 |
| MASP2    | 37.2838080935695 | 38.4330755397458 | 39.7411455670172 | 40.646702696033  |
|          | 43.5880694884799 | 39.2248354955045 | 42.4939802311136 | 44.1311654985682 |
|          | 38.6479526839866 | 38.9074189954657 | 36.2951478373477 | 42.7782216342806 |
| MAST1    | 34.5886782974123 | 37.8217989841918 | 39.8299340037009 | 42.0102671859606 |
|          | 61.7566103867825 | 43.3785777889265 | 52.561573697155  | 45.7476095696859 |
|          | 41.863927676552  | 39.1621898366355 | 42.0750889188255 | 45.6692241948108 |
| MAST2    | 37.7384958256497 | 35.2143190355414 | 38.3166554965434 | 35.8472302065546 |
|          | 40.9950639693255 | 54.3478800757394 | 38.7337086062875 | 41.5464765641928 |
|          | 45.3756389170606 | 37.0320432433314 | 38.6662194645633 | 40.2669497398702 |
| MAST3    | 87.5146535320072 | 100.774098314706 | 93.9472621843566 | 236.242651711871 |
|          | 126.897002134472 | 84.8235093165193 | 57.1070449050465 | 92.9043863423147 |
|          | 93.7090094630558 | 92.4534854832186 | 79.1922819549042 | 82.2650787041549 |
| MAST4    | 45.1912496459517 | 83.014860007187  | 69.4967762263181 | 50.378948785456  |
|          | 70.0133734659853 | 55.3202238943712 | 88.8039637390786 | 47.5950227477807 |
|          | 64.643220133046  | 68.6095266659765 | 59.501103909345  | 43.8575940017119 |
| MASTL    | 60.2547250212462 | 62.3102413989199 | 65.7002710293248 | 59.897987870592  |
|          | 73.6323065529916 | 51.7594352155304 | 74.2690269784394 | 71.1607965028029 |
|          | 80.0381580139229 | 52.6040246568056 | 55.9604109457703 | 55.2449003905956 |
| MAT1A    | 44.1294459089314 | 33.0553208959996 | 40.301483914446  | 41.7614975630362 |
|          | 40.3452320167286 | 38.5252456306656 | 52.0942589368478 | 37.2237132058632 |
|          | 41.9635525160083 | 34.5718473203083 | 43.3085358214154 | 37.1747156131306 |

|        |                  |                  |                  |                  |
|--------|------------------|------------------|------------------|------------------|
| MAT2A  | 1881.7281441986  | 1950.93175239958 | 2248.64628069362 | 1582.45600339543 |
|        | 1928.53890809223 | 3966.51586153125 | 1771.43541011426 | 4482.5285743878  |
|        | 1756.86714809925 | 2951.88559311416 | 2568.97574985073 | 1379.51119430451 |
| MAT2B  | 183.526640731647 | 195.018775118528 | 220.822548634548 | 279.175841990291 |
|        | 150.709301569371 | 184.048982286364 | 214.316246155274 | 204.089652936303 |
|        | 236.440703574276 | 255.884444464408 | 280.920208331594 | 342.829992044257 |
| MATK   | 54.0461131287999 | 52.5241397377838 | 46.9752378383553 | 111.626292905866 |
|        | 140.853812988562 | 50.0748292497578 | 41.4244721780607 | 45.4277931036827 |
|        | 41.526706795548  | 42.3346523186171 | 46.9233666895929 | 46.0201052072883 |
| MATN1  | 40.9558083259517 | 41.6466169548846 | 37.9482157381008 | 42.8235313007746 |
|        | 39.5595233162192 | 44.3648993568405 | 39.1539892144371 | 43.1567024035183 |
|        | 42.0621425894624 | 37.0320432433314 | 39.3667161654772 | 35.9604262434141 |
| MATN2  | 63.2343637481705 | 144.098339910117 | 106.871269007146 | 129.653830303132 |
|        | 271.393858310441 | 571.170643523692 | 338.164006403    | 110.52925781809  |
|        | 182.06733830953  | 466.454993547103 | 318.234214341679 | 256.995917821765 |
| MATN3  | 54.2648201582657 | 45.5842286511645 | 41.528370959196  | 38.8495095797881 |
|        | 46.6397391251762 | 40.244271403831  | 44.0687697278114 | 44.5029690493211 |
|        | 42.9020321355927 | 44.6918600441328 | 45.1432412071268 | 39.4490233720848 |
| MATN4  | 35.5631236789214 | 34.8956628705329 | 38.5045333213784 | 37.7235613375742 |
|        | 40.2449343247539 | 40.3357777530419 | 40.6130792100165 | 45.9159813905292 |
|        | 35.9083761938612 | 37.0884880300916 | 37.2619222515562 | 37.6276092293112 |
| MATR3  | 206.899594905509 | 210.096514889445 | 195.221917652149 | 215.645475520124 |
|        | 201.941251308732 | 308.183340806373 | 209.178131628825 | 282.328238928883 |
|        | 204.370291548631 | 195.303781999387 | 237.864776225441 | 294.849830545881 |
| MAX    | 49.3032082171836 | 50.8388984085636 | 54.4841007515344 | 68.9937449813561 |
|        | 53.1884505015411 | 70.5699797830702 | 54.2407836381501 | 52.3660712483179 |
|        | 60.2417579280647 | 50.7266835538507 | 48.5858417196146 | 57.3697604614404 |
| MAZ    | 49.1868644496737 | 61.4293032144288 | 51.0134173812106 | 43.3744503319109 |
|        | 80.5437011468815 | 49.2731519807085 | 50.4430599873056 | 61.7572675712557 |
|        | 49.9162522057712 | 43.881163603004  | 50.3745056312199 | 45.4365580679461 |
| MB     | 295.917955889194 | 43.2021363380894 | 40.2462600028464 | 41.0726336841311 |
|        | 44.4031868028216 | 43.9724628401189 | 39.4600924554505 | 42.7020359196292 |
|        | 80.7067505750848 | 41.1688470149988 | 42.1537476443423 | 38.0958223740111 |
| MBD1   | 68.7436392042714 | 138.036631806718 | 168.640033281185 | 102.177189421378 |
|        | 70.8515676385543 | 81.0259717888094 | 87.8746766762445 | 69.8941497035747 |
|        | 112.230023772979 | 99.0596863442346 | 104.135574209392 | 106.10668428032  |
| MBD2   | 40.6980379702667 | 51.6527806785838 | 47.3861758958576 | 51.290704469313  |
|        | 40.4091351714709 | 46.3715909653832 | 43.8835874380262 | 42.6786833450085 |
|        | 53.5224822626949 | 41.785676764591  | 41.134180463103  | 46.113826596024  |
| MBD3   | 91.1363393944977 | 106.398825125486 | 92.9894133685392 | 93.3216420803293 |
|        | 129.917299534089 | 77.3999378505514 | 118.899737794318 | 90.4512650366645 |
|        | 112.311249826645 | 104.129763935677 | 137.955007835039 | 89.1771576058145 |
| MBD3L1 | 40.4639532172338 | 35.1224289925572 | 37.5597671487621 |                  |
|        | 31.1401844809132 | 39.3667161654772 | 38.8336427948187 | 34.4570158133896 |
|        | 37.7612949798895 | 39.9444191873552 | 39.0648733099061 | 35.9563099719284 |
|        | 40.4639532172338 |                  |                  |                  |
| MBD3L2 | 38.1169703906207 | 34.6306468196142 | 45.2313723727673 |                  |
|        | 39.6292788039793 | 36.8059561571675 | 35.4142595025086 | 43.9450023643394 |
|        | 38.2782436497441 | 41.7627910693483 | 39.4710743516517 | 37.8372168909583 |
|        | 40.2669497398702 |                  |                  |                  |
| MBD4   | 1383.53136710469 | 682.227514643175 | 985.328482076985 | 904.487756674518 |
|        | 559.559234461244 | 446.37035118289  | 941.514118803572 | 2405.8635632802  |
|        | 521.029507993615 | 1864.63057767867 | 1907.47560253019 | 1201.00042684883 |

|        |                  |                  |                  |                  |
|--------|------------------|------------------|------------------|------------------|
| MBD5   | 42.3620028137457 | 44.1239711172417 | 43.3465699185405 | 46.1074305700679 |
|        | 43.1847628331565 | 48.8744644207821 | 40.7910160811527 | 40.4669141685209 |
|        | 45.620219291723  | 49.3654837541353 | 48.5835484742456 | 42.6758568421347 |
| MBD6   | 342.643344197936 | 759.184121753305 | 603.224267841548 | 480.660242705293 |
|        | 285.56460901579  | 223.911125639211 | 321.069136463599 | 468.98857415608  |
|        | 644.368005872231 | 550.642253702646 | 556.417356025042 | 310.821299796803 |
| MBIP   | 71.2246788429078 | 91.9238405195899 | 100.370937669662 | 70.1293136216228 |
|        | 68.7911855725594 | 103.43536623122  | 55.2998422481855 | 48.272324215504  |
|        | 88.1331756561668 | 70.6138659908885 | 79.0940380276977 | 75.2824161164996 |
| MBL1P1 | 44.8914371498528 | 45.4882438975269 | 44.2405728317107 |                  |
|        | 52.8502823653368 | 68.3928560299063 | 49.4157684139858 | 60.5125774827425 |
|        | 47.3791873993182 | 52.4539007817929 | 47.4767851750188 | 51.0492389286271 |
|        | 46.8129509799753 |                  |                  |                  |
| MBL2   | 41.6354649482853 | 36.1232327599945 | 38.8775560911841 | 45.5869891570251 |
|        | 40.6723334103791 | 36.2768299545794 | 38.6243997507646 | 38.956280281655  |
|        | 42.7150227340364 | 43.401782064778  | 37.0180934800573 | 39.5418280570561 |
| MBNL1  | 93.5982028088194 | 85.2893380711323 | 100.494620361408 | 190.647389246848 |
|        | 103.561100886469 | 255.365088438518 | 86.4898752526885 | 104.089998273812 |
|        | 101.01459505339  | 165.029434090892 | 145.694779669933 | 185.579050480127 |
| MBNL2  | 121.281573820819 | 139.847976281228 | 108.847044476692 | 115.913030448537 |
|        | 111.320157744612 | 175.619398238068 | 104.158950889938 | 127.847433799614 |
|        | 123.618276821013 | 159.667153030627 | 136.766779297051 | 201.145927216439 |
| MBNL3  | 43.8550481835503 | 48.142959612073  | 50.3950981988762 | 48.260931742163  |
|        | 45.7356815244513 | 51.4931742685391 | 48.0987228351168 | 44.7534143226043 |
|        | 44.7699099047043 | 48.1802212380953 | 47.7052132264218 | 50.9612733880858 |
| MBOAT1 | 118.410983614453 | 62.9904770954043 | 47.8263530599296 |                  |
|        | 50.0526763693329 | 48.0987228351168 | 57.2767879969284 | 90.5860767851498 |
|        | 80.5508300225954 | 66.4900180648559 | 54.2830238965339 | 63.6287257620165 |
|        | 54.3418785197547 |                  |                  |                  |
| MBOAT2 | 77.441946514938  | 59.135659721231  | 62.2200723764909 |                  |
|        | 54.9919060580109 | 51.6869155634183 | 66.6320017520888 | 73.6855877240541 |
|        | 90.0682241853516 | 72.7381690659677 | 74.0614295574729 | 72.1955435994725 |
|        | 74.8170892324966 |                  |                  |                  |
| MBOAT7 | 212.302291274084 | 487.065758294354 | 466.074595343541 |                  |
|        | 432.001201940414 | 401.202348352506 | 168.17913316957  | 395.457351443921 |
|        | 379.031536537372 | 822.822769402853 | 533.468347491982 | 602.726022292973 |
|        | 324.320137371059 |                  |                  |                  |
| MBP    | 107.576033955049 | 201.301705082976 | 112.328675926999 | 304.658728492827 |
|        | 87.8724689898823 | 141.154520472188 | 143.913007288353 | 88.715256326632  |
|        | 131.99898435227  | 251.803102904399 | 196.623560874725 | 305.959643033169 |
| MBTD1  | 201.764909400617 | 121.45753287862  | 122.052907748249 | 144.427680369554 |
|        | 94.9104200955155 | 75.9713712509177 | 188.30834153268  | 267.523307072523 |
|        | 102.605473054584 | 230.73977644867  | 254.239142284878 | 162.160380044249 |
| MBTPS1 | 278.850071205987 | 299.890705180422 | 334.170764774986 |                  |
|        | 243.015896514493 | 229.188779190649 | 248.797398220982 | 249.246628143531 |
|        | 213.028412890553 | 244.466972245417 | 260.964562714558 | 276.267583952979 |
|        | 252.206029058968 |                  |                  |                  |
| MBTPS2 | 42.8036731479932 | 49.4067286971348 | 55.6865353018811 |                  |
|        | 53.2046867327331 | 47.6884372645373 | 49.9699131196797 | 43.5627649099623 |
|        | 48.0582855095143 | 47.9035532886869 | 43.2988017098387 | 40.3452320167286 |
|        | 46.8129509799753 |                  |                  |                  |
| MC1R   | 151.740176274202 | 82.5344501505114 | 90.7037473522607 | 94.080489738662  |
|        | 95.1131101630937 | 62.9688525319822 | 61.3620062177524 | 106.292775688671 |
|        | 99.3797043236938 | 74.6847594297153 | 82.3364971911816 | 87.8967913380047 |

|        |                   |                  |                  |                  |
|--------|-------------------|------------------|------------------|------------------|
| MC2R   | 37.2474303302343  | 41.554942319225  | 40.7620472083159 | 50.0526763693329 |
|        | 36.2048942610546  | 36.3845892764084 | 34.9344532055397 | 37.4484310268909 |
|        | 38.8271346375425  | 37.5343260962758 | 36.43924066428   | 43.8575940017119 |
| MC3R   | 41.4508241771315  | 38.6414316877471 | 46.5650556481721 | 39.7411455670172 |
|        | 38.745552403895   | 36.6996187567892 | 39.8695929627783 | 41.9315419791594 |
|        | 35.0305278582179  | 37.3179578037963 | 45.6348103033479 | 42.4607795638552 |
| MC4R   | 39.9697332660833  | 34.9262464079777 | 36.8730514568925 | 43.074472921841  |
|        | 40.5710637884029  | 39.9397419279057 | 34.6720534245631 | 39.3709357615493 |
|        | 40.4220196471124  | 41.7405682794166 | 41.2598458726002 | 47.7962548556026 |
| MC5R   | 34.5886782974123  | 40.9731067463382 | 36.6522278218553 | 41.1886975241176 |
|        | 38.5512429290626  | 42.8598805316863 | 31.098971689775  | 34.4896350146096 |
|        | 38.0213051227859  | 39.9948390976317 | 44.0409178714232 | 31.7413650507468 |
| MCAM   | 34.6977013306396  | 43.1805016690297 | 48.2883694323339 | 38.6414316877471 |
|        | 41.6806984441849  | 54.5952754712007 | 39.8695929627783 | 40.4359177791566 |
|        | 37.4540772310118  | 52.3304586399695 | 49.7363778831003 | 45.3763275588341 |
| MCART1 | 1991.4199819544   | 723.853348464335 | 979.468753716758 |                  |
|        | 1357.41745370754  | 698.595302020108 | 569.966632625157 | 1282.9181829891  |
|        | 3001.25236839028  | 750.151825182993 | 2384.00264993279 | 2672.94421680196 |
|        | 2313.21212353993  |                  |                  |                  |
| MCART2 | 39.0620487644635  | 40.2493681589104 | 38.0958223740111 |                  |
|        | 38.6414316877471  | 35.6434124419782 | 38.1699123824764 | 40.4941260038116 |
|        | 39.42235444019653 | 41.9083581529276 | 34.9138625012006 | 40.6723334103791 |
|        | 39.8497227447888  |                  |                  |                  |
| MCART6 | 41.483412492426   | 43.5182502375207 | 37.0642268327439 |                  |
|        | 44.3440839686558  | 42.6575535390785 | 40.3357777530419 | 41.3094485574845 |
|        | 40.5640952422779  | 40.7847110517594 | 41.9097689475185 | 39.5399188536544 |
|        | 40.9683275553869  |                  |                  |                  |
| MCAT   | 73.7800733276454  | 77.2218991550552 | 64.7318794662958 | 49.9672547361866 |
|        | 100.645556491457  | 60.8250302910721 | 99.2432911346944 | 71.9369353731849 |
|        | 79.0276852011359  | 53.8260140375214 | 60.4620008899889 | 59.8400088701028 |
| MCC    | 43.9309845324767  | 50.8114699212931 | 67.6373573669424 | 45.5869891570251 |
|        | 55.8173045043348  | 45.4882438975269 | 45.6042625176633 | 41.1575777497576 |
|        | 55.6617952786921  | 49.1928206164702 | 52.8489752025797 | 58.8188963227059 |
| MCCC1  | 187.672799470683  | 406.668753694984 | 402.412173952792 | 158.364437886751 |
|        | 508.474794786176  | 219.291627770586 | 968.405745860353 | 432.001201940414 |
|        | 405.852280880924  | 735.60603239712  | 498.284928805673 | 778.723771259404 |
| MCCC2  | 94.696942512529   | 208.97126697486  | 174.752830194939 | 50.5310598656998 |
|        | 126.360723656793  | 76.1019439127881 | 109.615289274998 | 95.9391851122771 |
|        | 117.282216847547  | 57.165971310746  | 68.3157692917711 | 76.7791768896805 |
| MCCD1  | 43.1805016690297  | 43.5873188565519 | 43.8495248991589 | 44.550322123994  |
|        | 47.6884372645373  | 41.2567470068038 | 50.2016912396771 | 45.642304356051  |
|        | 48.9931786790166  | 42.8936990772838 | 42.2618615571566 | 40.7704587752083 |
| MCEE   | 248.924819383887  | 221.450737998571 | 224.480311257437 | 271.900886756161 |
|        | 170.184914156265  | 192.666532389331 | 205.279698624867 | 175.652989203497 |
|        | 148.144200968432  | 170.560304063093 | 141.79653024085  | 259.855509977658 |
| MCF2   | 40.8681871019812  | 37.3634897565502 | 44.0451487108213 | 44.550322123994  |
|        | 42.6022652963326  | 38.9378717994178 | 41.5817737564592 | 36.6452480995946 |
|        | 41.3803269429468  | 46.1390887492649 | 39.2542963855807 | 40.8681871019812 |
| MCF2L  | 45.3872406432794  | 44.5884811528117 | 43.5710871617107 | 37.1894304543751 |
|        | 43.7517118200398  | 39.3841861812262 | 45.8980298854198 | 40.831207953647  |
|        | 42.9020321355927  | 43.6033221838149 | 41.9908237694988 | 40.5703581862752 |
| MCF2L2 | 44.5798743103596  | 43.683792219729  | 46.8267540220952 |                  |
|        | 44.2166118829877  | 44.6202070855297 | 38.1169703906207 | 42.6913548400127 |

|          |                  |                  |                  |                  |
|----------|------------------|------------------|------------------|------------------|
|          | 44.6511073781104 | 43.2163597439147 | 46.614092935749  | 38.5668610487033 |
|          | 39.7411455670172 |                  |                  |                  |
| MCFD2    | 109.649431670339 | 62.4914906186314 | 88.5601339449828 | 100.774098314706 |
|          | 77.7140342228764 | 120.284321694275 | 57.5955320223035 | 91.9919654450652 |
|          | 72.2527203451447 | 75.9802606133139 | 75.949657568749  | 107.440379066528 |
| MCHR1    | 39.6609238036815 | 41.6466169548846 | 38.7745734037492 | 38.4208429103799 |
|          | 42.4864576619427 | 33.4492509999281 | 34.9344532055397 | 36.43924066428   |
|          | 40.8970401536578 | 41.7405682794166 | 42.6366765186182 | 34.9138625012006 |
| MCHR2    | 48.5835484742456 | 42.7275315121163 | 44.9758339877851 | 40.9141850646578 |
|          | 49.0828761839116 | 44.3648993568405 | 43.8206425661746 | 44.7044140979108 |
|          | 45.1569741609597 | 45.7328341667151 | 45.5707650534259 | 48.9944486068347 |
| MCL1     | 162.955976144315 | 251.299662213686 | 202.957014793417 | 594.611678976716 |
|          | 161.422918681934 | 331.390452289344 | 176.936216428226 | 524.047008889711 |
|          | 145.459578481501 | 110.048921728774 | 123.868848519181 | 133.781790945099 |
| MCM10    | 105.05842887748  | 82.966263655525  | 57.0427273538849 | 60.9379216295576 |
|          | 149.475318376458 | 55.2515150764173 | 184.938142193035 | 102.457537266105 |
|          | 110.699536638528 | 39.7835513496873 | 43.5710871617107 | 43.7672102682067 |
| MCM2     | 250.959527806799 | 245.060552951511 | 129.697400781396 | 154.829574442056 |
|          | 443.425400626341 | 114.769498252688 | 530.314249832491 | 307.974082654351 |
|          | 330.892010103508 | 86.3374157614394 | 96.6294773538052 | 103.561100886469 |
| MCM3     | 947.656220635965 | 975.544591158047 | 516.992846073349 | 277.014526407597 |
|          | 1023.81381775221 | 384.401256392893 | 1071.64675274806 | 760.745188431719 |
|          | 799.803676957263 | 703.315796616275 | 748.372940917543 | 684.865133028228 |
| MCM3AP   | 178.881586334601 | 197.720854621428 | 268.265540230814 |                  |
|          | 256.026804821501 | 376.215561392485 | 193.703214707909 | 167.229755109155 |
|          | 193.981651711507 | 198.288493088076 | 241.278168450381 | 220.79051545138  |
|          | 214.691909801388 |                  |                  |                  |
| MCM3APAS | 48.5835484742456 | 46.4385386401326 | 59.9690744676539 |                  |
|          | 45.8844325913247 | 50.0580547772867 | 46.574682061365  | 58.8993834673475 |
|          | 48.87875862356   | 49.9162522057712 | 47.2299678280724 | 46.6442692119997 |
|          | 47.7962548556026 |                  |                  |                  |
| MCM4     | 176.43047680293  | 439.106576928682 | 295.127975044241 | 118.625610664218 |
|          | 553.094571132092 | 144.412165495719 | 584.889303693522 | 487.540800793233 |
|          | 604.357590751951 | 154.847446197442 | 141.977447082092 | 164.122105098254 |
| MCM5     | 219.134220280612 | 286.243476131448 | 202.360546931172 | 207.540972220982 |
|          | 255.946758662074 | 114.190951215203 | 486.911782180966 | 270.110273110996 |
|          | 376.141477833569 | 122.702789229752 | 122.849949163123 | 114.142157259903 |
| MCM6     | 570.824732318332 | 685.386956092142 | 454.106740411779 | 493.322302312578 |
|          | 843.333981146512 | 475.621740714165 | 1026.51177853708 | 643.9329225331   |
|          | 858.228943026906 | 224.266559865201 | 193.649113002244 | 282.90107781812  |
| MCM7     | 256.426184741007 | 416.972264086884 | 230.975122271137 | 155.762961582213 |
|          | 426.933064567744 | 189.865569826568 | 475.008345432596 | 303.93332785291  |
|          | 508.688028777582 | 209.658186168638 | 170.475212920685 | 175.165302282522 |
| MCM8     | 448.787414220553 | 278.140612054333 | 335.818251279914 | 488.089090043145 |
|          | 265.520773157991 | 195.836475280084 | 350.106705208362 | 776.670493028756 |
|          | 235.574006931404 | 569.966632625157 | 541.105845300009 | 450.008356194664 |
| MCMDC1   | 48.5835484742456 | 44.8529259387308 | 54.6051538001037 |                  |
|          | 48.309866878365  | 47.8075998240396 | 43.2805590023412 | 47.8947595316832 |
|          | 42.9301944191913 | 49.2879849674517 | 44.571915452417  | 45.7328341667151 |
|          | 49.1200355938198 |                  |                  |                  |
| MCOLN1   | 197.515728627482 | 203.092045210928 | 233.07404514708  |                  |
|          | 762.855719373733 | 470.676006277762 | 364.141443387516 | 260.232090974645 |
|          | 297.701126167694 | 149.139710097196 | 199.54796711653  | 239.792011765323 |
|          | 138.748233664345 |                  |                  |                  |

|        |                  |                  |                  |                  |
|--------|------------------|------------------|------------------|------------------|
| MCOLN2 | 58.5759178381027 | 66.5141009463313 | 62.5610562594275 |                  |
|        | 211.019451518444 | 52.5645416722441 | 47.3791873993182 | 58.3675164086197 |
|        | 84.0899854321388 | 37.10170285405   | 49.5265949137207 | 60.4620008899889 |
|        | 44.1452943804044 |                  |                  |                  |
| MCOLN3 | 42.3433931248155 | 43.683792219729  | 42.2577689927563 |                  |
|        | 72.6824533717231 | 40.148780650831  | 44.812853905056  | 53.3111230705754 |
|        | 52.4518619184838 | 41.7233690251839 | 47.1785588364488 | 63.5716064500377 |
|        | 45.3267183347084 |                  |                  |                  |
| MCPH1  | 53.0290605707162 | 66.5864907685351 | 61.2153068100932 | 59.8102324370568 |
|        | 49.0828761839116 | 65.813547096222  | 53.1884505015411 | 46.5717043290731 |
|        | 52.7512110769042 | 53.3059058105836 | 71.4414688202373 | 62.8485724004124 |
| MCRS1  | 266.581466060604 | 314.091389958069 | 326.121479451246 | 219.702703529829 |
|        | 246.20973320244  | 204.064420098696 | 313.921236120658 | 207.833867050257 |
|        | 387.039093527273 | 269.284584971871 | 247.723546145775 | 209.986313475002 |
| MCTP1  | 39.8299340037009 | 42.5269793679335 | 46.6588655218735 | 84.3589195870713 |
|        | 39.5111866657136 | 52.5745485771927 | 39.3895791800635 | 39.853866204927  |
|        | 42.8036731479932 | 41.0529409675663 | 37.1617810121175 | 42.357910063876  |
| MCTP2  | 38.7537364570873 | 64.6970918899831 | 50.6004078448405 | 66.7750249658122 |
|        | 57.9161791762225 | 47.5733603903505 | 52.561573697155  | 45.7476095696859 |
|        | 58.2401724760744 | 41.9666541498638 | 49.0361180089431 | 61.8529316708431 |
| MCTS1  | 54.931538325692  | 56.6146179789815 | 63.1450855271137 | 78.0020909283414 |
|        | 73.0433648756396 | 65.3096524773304 | 77.2154078285418 | 78.6911549149983 |
|        | 83.8679756709676 | 52.0999467564713 | 60.4620008899889 | 74.5173894803763 |
| MDC1   | 129.014076422249 | 104.015868591647 | 90.6191520659197 | 81.6780581904253 |
|        | 105.825228126465 | 104.305801811472 | 113.322929203297 | 80.9092480872499 |
|        | 80.5437011468815 | 76.6346767983285 | 95.6182216943758 | 101.156215957297 |
| MDFI   | 35.3227485563945 | 38.5252456306656 | 40.6737160001291 | 32.0298369224145 |
|        | 36.3390947880186 | 39.6251842352088 | 30.4430902995779 | 31.9468644542969 |
|        | 31.0594903826598 | 32.9003644440608 | 37.3687900733549 | 36.6603338274678 |
| MDFIC  | 64.7766649630041 | 71.0935990523782 | 91.9919654450652 | 61.8997157694697 |
|        | 77.1287755867582 | 91.9459432547337 | 54.6414321010929 | 56.0496524902806 |
|        | 62.370559099758  | 47.0055981216687 | 55.9269493191353 | 75.2431285480772 |
| MDGA1  | 49.540449125788  | 46.2286164776607 | 43.6670755115848 | 35.8472302065546 |
|        | 42.3685136297603 | 50.5148383400703 | 37.9430145836712 | 45.4757965005055 |
|        | 48.1174861108648 | 48.8623729374733 | 51.3103617600342 | 46.917149434588  |
| MDGA2  | 43.4626049853157 | 38.4330755397458 | 40.4070046183108 | 39.5050383901884 |
|        | 38.745552403895  | 41.4508241771315 | 40.7910160811527 | 46.7980335276155 |
|        | 41.9635525160083 | 40.3235655331796 | 37.9230440150891 | 43.6753843488695 |
| MDH1   | 1377.24483375075 | 1305.35453202355 | 1473.52943897204 | 1327.93833415582 |
|        | 1686.40194722823 | 1430.73068989193 | 1327.93833415582 | 1445.73674428909 |
|        | 1910.5347560855  | 822.822769402853 | 1020.75813028358 | 1249.78418100778 |
| MDH1B  | 37.55264801907   | 37.6383530120621 | 48.1331309338997 | 38.2041059863839 |
|        | 39.3667161654772 | 43.8582747295766 | 38.0598374201407 | 40.1474543172332 |
|        | 39.4762546236449 | 41.4397539024976 | 42.4580504587581 | 40.4639532172338 |
| MDH2   | 2755.23573327276 | 3143.97163345458 | 2791.75465171135 | 1506.33570635551 |
|        | 3153.71394627237 | 1910.5347560855  | 3244.27810937143 | 2551.57660786358 |
|        | 3520.7579823657  | 2712.36664370642 | 2374.1766901821  | 2951.88559311416 |
| MDK    | 237.237762964658 | 711.773459577386 | 179.629622763381 | 87.9098670472958 |
|        | 256.026804821501 | 231.304658157247 | 979.468753716758 | 775.515071756239 |
|        | 954.116675685628 | 97.0055689383756 | 128.966814822678 | 151.266092912661 |
| MDM1   | 45.4321966598751 | 47.303320038958  | 50.6606962867606 | 43.4410741327254 |
|        | 46.3150221024046 | 53.1457020450516 | 46.3057385979341 | 41.7419877611072 |
|        | 45.9828778193335 | 42.22763273471   | 46.6882473842548 | 45.5800840647989 |



|        |                  |                  |                  |                  |
|--------|------------------|------------------|------------------|------------------|
| MDM2   | 39.1125272232764 | 41.554942319225  | 40.1985790927248 | 41.1886975241176 |
|        | 39.997661145727  | 38.3984625132524 | 41.3094485574845 | 40.9861485852278 |
|        | 39.3750969348308 | 38.8025302527057 | 40.1742127891824 | 39.7411455670172 |
| MDM4   | 45.1912496459517 | 61.3838877877366 | 72.0243286940589 | 49.7350276169552 |
|        | 53.1884505015411 | 47.9503724044453 | 40.9157352260901 | 44.1311654985682 |
|        | 47.3791873993182 | 46.2286164776607 | 48.2050207071554 | 58.6481644777552 |
| MDN1   | 46.9939712192224 | 54.8439819445945 | 50.6987358483181 | 51.5913529948887 |
|        | 54.6820069269589 | 45.4882438975269 | 54.9765783642973 | 52.0503062610092 |
|        | 54.4912806027381 | 48.6124127998952 | 48.4717951775049 | 46.7182294568603 |
| MDP-1  | 92.7427427543974 | 77.5737637002275 | 99.8231023149756 | 104.672760332135 |
|        | 56.359578588344  | 117.699959435983 | 74.0039764902057 | 80.9092480872499 |
|        | 92.0711167984454 | 87.3815040456105 | 90.1284518302601 | 80.9092480872499 |
| MDS1   | 36.8072833828297 | 35.0222940937513 | 41.6079958749402 | 40.8681871019812 |
|        | 36.08956004634   | 34.1806289878747 | 38.1793598983615 | 40.5158867964016 |
|        | 37.5469247328848 | 42.2614524730856 | 37.2892641289258 | 47.2131144508464 |
| ME1    | 52.502055890816  | 54.5374188496807 | 39.3709357615493 | 54.8412943008635 |
|        | 46.9906120932727 | 124.751020763508 | 59.1774824918359 | 61.6839343510302 |
|        | 53.7442594289333 | 66.0786923699684 | 63.2684764441521 | 67.1675878355908 |
| ME2    | 126.253578620746 | 189.542991004953 | 160.459991480576 | 226.970981973829 |
|        | 110.540953771795 | 209.363955566338 | 131.955454394903 | 129.236597599908 |
|        | 134.407474121421 | 97.2004257862686 | 123.455270940015 | 175.165302282522 |
| ME3    | 57.0430104900107 | 104.860298453006 | 71.501028931626  | 57.5666238219027 |
|        | 68.9258122619781 | 81.1761078123004 | 99.2824152850072 | 69.8231400816467 |
|        | 72.4220552950926 | 103.470005076276 | 85.9596109950132 | 77.5290879537731 |
| MEA1   | 289.716911324484 | 137.302487233881 | 181.516519907011 | 176.492987902471 |
|        | 225.589127792587 | 182.836805462079 | 257.711912004    | 192.398575159246 |
|        | 229.971492699272 | 179.629622763381 | 177.757247913754 | 199.970127219451 |
| MECP2  | 54.5358897781765 | 51.7983110178095 | 52.0742951366864 | 52.1201052574162 |
|        | 62.1836961153924 | 70.380703483689  | 44.3440839686558 | 41.0381860307445 |
|        | 47.0804681460898 | 64.5347406608537 | 58.9676332048764 | 53.2046867327331 |
| MECR   | 51.5888395924843 | 67.8208976798364 | 88.2959958615748 | 42.6222445667107 |
|        | 60.5290966885203 | 64.4065381524425 | 71.3527183280827 | 65.5237529271975 |
|        | 53.4921736109774 | 65.1516921033166 | 69.652475454588  | 64.7598303406649 |
| MED10  | 353.674963012657 | 256.426184741007 | 203.178221073902 | 294.51382100172  |
|        | 178.323615832679 | 299.74710723735  | 377.315812006339 | 232.516262874696 |
|        | 279.063292799015 | 233.635083076472 | 254.874064929741 | 251.2365884576   |
| MED11  | 52.5792653122861 | 47.2055133646385 | 52.2132783757422 | 50.5310598656998 |
|        | 44.147557390293  | 44.0804700754786 | 43.1931731665131 | 47.7889447429963 |
|        | 40.8970401536578 | 43.6033221838149 | 47.6125796208753 | 47.0130468198828 |
| MED12  | 114.288115730578 | 100.139490974785 | 101.577767481269 | 119.253559091088 |
|        | 90.2652818919579 | 96.8185145589133 | 142.03031230486  | 138.783011990219 |
|        | 108.42710653018  | 141.386644354989 | 123.978615472736 | 94.1128427766432 |
| MED12L | 38.0089018744739 | 39.1982470626863 | 39.6451483836089 |                  |
|        | 41.4273122914951 | 39.1650142708257 | 43.9724628401189 | 36.7356360093603 |
|        | 37.1317006162938 | 38.3418933808844 | 38.4187686307607 | 37.3687900733549 |
|        | 37.4554876386402 |                  |                  |                  |
| MED13  | 39.0620487644635 | 46.0023068797812 | 45.645828394758  | 49.7350276169552 |
|        | 39.3999056968598 | 42.6575535390785 | 43.6753843488695 | 42.157627240486  |
|        | 42.38204124321   | 39.6719190054379 | 43.4424616940528 | 44.1452943804044 |
| MED13L | 53.8856501960117 | 47.2770121962655 | 51.223859150798  |                  |
|        | 42.8235313007746 | 42.1650127805175 | 59.2643906275025 | 48.6395795163502 |
|        | 47.2009420656854 | 52.3579564953125 | 48.6124127998952 | 54.9765783642973 |
|        | 50.2163892855092 |                  |                  |                  |

|       |                  |                  |                  |                  |
|-------|------------------|------------------|------------------|------------------|
| MED15 | 68.4906691348625 | 65.7457567201236 | 57.0427273538849 | 64.6945454069792 |
|       | 61.0468099710416 | 62.8946975076799 | 72.5288683768049 | 64.5531442955004 |
|       | 72.2120805585702 | 74.8706881113318 | 74.9006142438341 | 59.4889192275198 |
| MED16 | 210.807094064209 | 229.130963999337 | 265.667557678228 | 169.500205172068 |
|       | 329.437593022939 | 192.058030454066 | 264.263104842911 | 251.854446030066 |
|       | 257.761541860837 | 232.113067048781 | 272.879564902621 | 184.048982286364 |
| MED18 | 50.5670783769975 | 38.4330755397458 | 46.4569566520107 | 39.5050383901884 |
|       | 39.6535880152834 | 42.4580504587581 | 46.7100796279384 | 50.3082459161777 |
|       | 44.8997235283254 | 45.7911932481722 | 48.9754340235127 | 44.6484005362281 |
| MED19 | 146.333318667921 | 183.854020356927 | 222.40005420611  | 186.64040927334  |
|       | 327.238337722366 | 182.293430713391 | 412.072103136251 | 198.705875080904 |
|       | 225.161257242118 | 138.027432399991 | 137.555275829874 | 163.011116329807 |
| MED20 | 380.4099232546   | 266.634368304904 | 248.861100647206 | 229.971492699272 |
|       | 456.757277476069 | 246.500690127803 | 355.319959025243 | 228.254228465645 |
|       | 303.670126704469 | 379.098697147575 | 361.524083649962 | 393.209708455013 |
| MED21 | 43.9309845324767 | 43.5182502375207 | 42.2577689927563 | 45.8844325913247 |
|       | 44.9936360641969 | 45.2852528185486 | 43.5627649099623 | 41.9315419791594 |
|       | 38.9834959368496 | 45.5776159432079 | 47.0940613507321 | 56.1875519519366 |
| MED22 | 142.492693744683 | 117.389308836013 | 84.9280683258012 | 102.483081702338 |
|       | 125.891602778425 | 173.11353027932  | 189.705164944697 | 125.946162432491 |
|       | 120.679433440203 | 153.177725521199 | 135.41852974791  | 118.49449420132  |
| MED23 | 95.3754438202863 | 92.5391033814713 | 100.139490974785 | 87.0045333192221 |
|       | 76.5375674421131 | 72.768998788927  | 84.1327646296491 | 73.4447529556358 |
|       | 72.5027069303875 | 95.0026207727863 | 90.1284518302601 | 85.1718404558939 |
| MED24 | 255.126812649967 | 181.966839676473 | 201.875082892488 | 139.847976281228 |
|       | 257.851199206959 | 170.082014272945 | 355.92328557644  | 216.911833562615 |
|       | 422.817392818858 | 189.737472782071 | 201.360008430353 | 135.824520574227 |
| MED25 | 99.2824152850072 | 261.653821192385 | 276.699609951994 | 174.252441615373 |
|       | 342.829992044257 | 173.511692216696 | 232.911951245618 | 207.726011653345 |
|       | 289.05213385509  | 139.814194128548 | 166.488589768213 | 129.538159906075 |
| MED26 | 63.5693267269002 | 63.3667304749164 | 67.3469281984384 | 79.5838979704243 |
|       | 81.4621222177298 | 62.0660509811111 | 71.0369238830779 | 68.0342444360948 |
|       | 70.8606919488782 | 54.7827221235949 | 59.0537479001842 | 57.0524725494273 |
| MED27 | 68.021673481871  | 79.1432909353319 | 55.1547682957918 | 72.8120269375546 |
|       | 84.5572894783679 | 73.3270037834227 | 96.9476136220382 | 57.3837827230023 |
|       | 75.6382797289563 | 53.9918882088235 | 63.7818442618767 | 66.0224755625662 |
| MED28 | 147.033637977077 | 306.14500148663  | 262.277293680018 | 252.097980496533 |
|       | 314.609371608151 | 216.699423864285 | 234.359144097839 | 217.065944053174 |
|       | 312.40869171788  | 182.576662575358 | 227.535855856645 | 256.165801611585 |
| MED29 | 113.051477801522 | 122.099297248392 | 126.420070148631 | 102.786429761295 |
|       | 162.569762535436 | 170.829628173552 | 155.855834721836 | 254.756894822368 |
|       | 131.068763088422 | 114.796237914478 | 133.401306624347 | 124.409631245033 |
| MED30 | 218.132527712083 | 560.802447943839 | 157.750574478926 | 263.885462100853 |
|       | 447.248719481853 | 332.230531176052 | 297.105654460146 | 132.117013391364 |
|       | 299.74710723735  | 145.28255999556  | 167.25176386043  | 249.822387177805 |
| MED31 | 37.1485601150873 | 39.5050383901884 | 33.1559412791294 | 38.745552403895  |
|       | 39.2608760193011 | 36.2015763253919 | 37.3799542961839 | 36.43924066428   |
|       | 37.10170285405   | 36.4651112441576 | 38.3684202018524 | 35.4484652445078 |
| MED4  | 143.761359357965 | 232.320396482547 | 163.476051754305 | 154.019005732316 |
|       | 154.945533851823 | 162.80817471208  | 184.087380444203 | 150.011814577972 |
|       | 201.163076338483 | 122.504770242427 | 165.72797054597  | 244.707381127491 |
| MED6  | 509.004054793277 | 325.676668250281 | 550.861615347663 | 561.509463439533 |
|       | 580.27699437241  | 482.238595345574 | 562.258108316474 | 413.41645422004  |
|       | 605.338871441599 | 389.026128346842 | 433.194113859912 | 373.914455300185 |

|        |                  |                  |                  |                  |
|--------|------------------|------------------|------------------|------------------|
| MED8   | 164.404486294867 | 101.572081177165 | 90.1696131791736 | 139.679585117348 |
|        | 139.328628553223 | 124.998771394658 | 135.819510815042 | 147.961677716225 |
|        | 142.492693744683 | 64.4953675557046 | 75.5799609581534 | 94.9207160628331 |
| MED9   | 52.5792653122861 | 49.9547657591437 | 55.9459886217809 | 50.2163892855092 |
|        | 47.4548471240051 | 60.2083550387718 | 56.6537562775715 | 47.3791873993182 |
|        | 53.7442594289333 | 66.274247400793  | 66.9494774452406 | 62.3102413989199 |
| MEF2A  | 54.5358897781765 | 69.7855392178808 | 62.6532574724345 | 87.6763065012524 |
|        | 61.5236837309467 | 62.4450952595811 | 65.7873990226533 | 49.6203214143464 |
|        | 60.4837400912239 | 45.3530683538086 | 50.8826620053386 | 60.3816817102326 |
| MEF2B  | 43.844855336215  | 47.2055133646385 | 55.5567699051046 | 46.7577982595088 |
|        | 45.1137938810047 | 42.2577689927563 | 39.6535880152834 | 43.6434576713809 |
|        | 43.7630587657205 | 47.3791873993182 | 48.1352470945488 | 46.8129509799753 |
| MEF2C  | 39.7576136507593 | 48.1627097465883 | 45.7968648044613 | 92.3405202477427 |
|        | 38.3561682218911 | 80.099836448859  | 42.9803717121865 | 56.8094693588238 |
|        | 39.0775870687758 | 65.5349012839562 | 73.3321469094819 | 56.4578213622965 |
| MEF2D  | 124.866058211181 | 130.524308471577 | 128.327641457403 | 171.073367662623 |
|        | 96.0418367475772 | 207.245428311682 | 84.1780237893807 | 106.140215438654 |
|        | 72.9752827496503 | 185.579050480127 | 151.344720108793 | 144.711001798454 |
| MEFV   | 39.266565827316  | 41.690833180291  | 41.554942319225  | 64.3746985855249 |
|        | 38.8456942580061 | 35.6125439901743 | 39.7162631015511 | 40.8833572570383 |
|        | 38.2874316439311 | 40.3458948319669 | 35.5395819665562 | 39.8497227447888 |
| MEG3   | 335.818251279914 | 109.062415049404 | 86.9032093551446 | 150.709301569371 |
|        | 199.732059204509 | 188.811171804746 | 44.3440839686558 | 109.137372445043 |
|        | 47.8472928419101 | 104.068748231847 | 131.859371655356 | 87.7295604723036 |
| MEGF10 | 47.9175508887533 | 42.2577689927563 | 43.0016969050339 |                  |
|        | 44.0451487108213 | 45.4040191352687 | 38.5707420487455 | 44.2166118829877 |
|        | 45.5842286511645 | 43.0930293831497 | 41.7932258301997 | 43.8002456102021 |
|        | 42.0424641526302 |                  |                  |                  |
| MEGF11 | 35.8208542506595 | 36.7976562409506 | 40.0998167098057 |                  |
|        | 36.0481934423077 | 41.7929491793697 | 33.2552842693684 | 46.7100796279384 |
|        | 36.5393857306744 | 36.5393857306744 | 38.8507804383261 | 38.956280281655  |
|        | 44.9070250604284 |                  |                  |                  |
| MEGF8  | 45.0283997415478 | 47.087835967892  | 41.9287023391451 | 37.0273924363983 |
|        | 37.8679241954337 | 42.6575535390785 | 41.6466169548846 | 45.5842286511645 |
|        | 40.0403898620771 | 44.8997235283254 | 43.0710577955487 | 44.4951343330035 |
| MEGF9  | 44.1737502492846 | 47.1856919329105 | 40.4882741869718 | 49.6479308322777 |
|        | 41.9397336249742 | 47.8636003588181 | 45.1017494688414 | 40.5158867964016 |
|        | 51.5690261542089 | 47.3791873993182 | 49.1067959632109 | 45.2783024981315 |
| MEI1   | 40.8681871019812 | 48.0080291106034 | 50.4463723277824 | 105.406282523992 |
|        | 42.9775348174342 | 40.9043306643373 | 46.7100796279384 | 41.0920120134247 |
|        | 43.9133744699066 | 40.8049408996274 | 42.2618615571566 | 41.6550823405646 |
| MEIG1  | 37.2474303302343 | 39.8455060654531 | 38.4456289125816 | 39.066284740632  |
|        | 38.3085139808968 | 37.1894304543751 | 42.4493032770053 | 35.3608605269276 |
|        | 42.5864346233886 | 38.7008388965825 | 38.3166554965434 | 41.7072675309997 |
| MEIS1  | 120.289145237975 | 104.492750153479 | 108.12482131423  | 90.2790229242453 |
|        | 78.1275793755619 | 271.50380898418  | 68.5725871332774 | 91.9919654450652 |
|        | 98.6401096175932 | 344.512332068969 | 216.1413998895   | 183.526640731647 |
| MEIS2  | 52.6960621424156 | 53.2173939357349 | 47.0362584198466 | 52.2089306840125 |
|        | 60.4122350478242 | 110.837476359817 | 50.3519150282938 | 47.0940613507321 |
|        | 76.301438841111  | 90.8188865732032 | 89.737418965763  | 71.9000032422349 |
| MEIS3  | 62.2150049214174 | 45.4882438975269 | 38.6005272730664 | 45.2759158146116 |
|        | 44.4031868028216 | 53.6562515174849 | 41.7614975630362 | 59.3923286524971 |
|        | 45.8844325913247 | 41.9666541498638 | 50.8373208590626 | 50.0991178780329 |

|         |                  |                  |                  |                  |
|---------|------------------|------------------|------------------|------------------|
| MEIS3P1 | 96.0907205856398 | 134.646159826262 | 126.171040948196 |                  |
|         | 68.6379135603075 | 129.538159906075 | 162.049698241573 | 126.500059295217 |
|         | 118.854313907627 | 127.685709088018 | 194.079940066252 | 174.815922224726 |
|         | 170.932645135423 |                  |                  |                  |
| MELK    | 198.754967214875 | 201.427008153788 | 93.7260389087192 | 75.1163398247735 |
|         | 217.617227445082 | 62.3983214098965 | 350.796638646601 | 183.182947690657 |
|         | 255.946758662074 | 41.6373771565199 | 44.3763859390287 | 53.7442594289333 |
| MEMO1   | 99.8754776648876 | 92.0880591999243 | 112.328675926999 | 93.3216420803293 |
|         | 126.088821850066 | 71.0197205018137 | 115.610095595509 | 154.111066539468 |
|         | 99.3797043236938 | 92.0862930476852 | 91.4514026506253 | 112.113501370522 |
| MEN1    | 53.1309801459151 | 58.3853148450483 | 67.4984616497574 | 45.8844325913247 |
|         | 95.9298109273155 | 50.3617784914188 | 79.8196996067124 | 56.5280894868341 |
|         | 67.2500663500334 | 58.9069025298754 | 56.4873776344986 | 55.7575080755355 |
| MEOX1   | 39.6279144647521 | 47.5934444802346 | 49.8344973836834 | 64.4512696384839 |
|         | 43.7517118200398 | 59.0686629877982 | 43.0177448037924 | 51.3169658978959 |
|         | 43.0930293831497 | 48.7414853386615 | 46.794716003113  | 49.2677835329543 |
| MEOX2   | 44.436995101921  | 43.2649781354792 | 33.7737772393677 | 35.3829784221072 |
|         | 42.269054475455  | 40.7616966228404 | 36.7356360093603 | 35.7973685350741 |
|         | 37.7384958256497 | 42.2614524730856 | 40.6373400186325 | 43.6753843488695 |
| MEP1A   | 43.9309845324767 | 46.8954576545929 | 36.178547300352  | 51.0175677516029 |
|         | 47.4548471240051 | 36.2768299545794 | 49.8281348927244 | 41.3506832276112 |
|         | 44.5303781239209 | 47.1001757441025 | 43.9450023643394 | 44.9070250604284 |
| MEP1B   | 39.5676051939342 | 40.3384318592985 | 45.4865173433646 | 42.357910063876  |
|         | 39.6535880152834 | 41.159706131351  | 33.8558232866797 | 36.0306975524309 |
|         | 38.0213051227859 | 39.8873706855774 | 41.1638563416981 | 37.5556299264699 |
| MEPCE   | 220.682149473323 | 260.062749979574 | 236.791729190996 | 266.178061771978 |
|         | 341.397811775105 | 315.696895080135 | 237.237762964658 | 338.586852166449 |
|         | 366.915943380617 | 393.337170271481 | 341.601353423389 | 220.573371581491 |
| MEPE    | 44.0328992213727 | 41.8073910693411 | 48.7039705048129 | 39.5050383901884 |
|         | 41.2740822675592 | 37.9951997351435 | 44.8643898647322 | 39.2672712041774 |
|         | 40.2274522635576 | 36.8059561571675 | 40.0766543123257 | 41.3481355128089 |
| MERTK   | 97.6205705034407 | 178.188675055821 | 109.832638804839 | 219.431561967403 |
|         | 160.868571611805 | 145.676955166566 | 166.644251737703 | 125.573953188965 |
|         | 83.0262409967927 | 152.132756414024 | 142.048367760597 | 180.844663304872 |
| MESDC1  | 64.7766649630041 | 85.1950626054282 | 48.1997158668729 |                  |
|         | 68.9937449813561 | 66.6118713143653 | 56.2736599756843 | 72.0568616357755 |
|         | 109.922909644299 | 84.673375308972  | 53.8260140375214 | 51.838002904753  |
|         | 66.4626619269287 |                  |                  |                  |
| MESDC2  | 41.6354649482853 | 38.4330755397458 | 41.3366779545815 |                  |
|         | 41.6564075217517 | 39.7568367479301 | 43.5752393599169 | 46.3057385979341 |
|         | 38.1835938174625 | 38.6322728994674 | 49.5265949137207 | 42.2618615571566 |
|         | 45.1735152121056 |                  |                  |                  |
| MESP1   | 43.7585538437696 | 46.8954576545929 | 45.310660704531  | 60.1837189855762 |
|         | 84.4230484528318 | 53.4466111440611 | 98.7446830481164 | 114.84900130932  |
|         | 113.444217634165 | 53.4109882045447 | 51.2318935933116 | 54.0374522273907 |
| MESP2   | 43.0001432913058 | 40.3384318592985 | 39.7411455670172 | 38.0958223740111 |
|         | 41.2740822675592 | 39.4953494583071 | 48.8319884367456 | 41.0381860307445 |
|         | 43.0930293831497 | 45.7911932481722 | 38.4689132737495 | 36.7762265039864 |
| MEST    | 38.7169375795196 | 46.2625470410195 | 51.6159542017038 | 41.3027031037343 |
|         | 62.7743500747415 | 44.7058233759912 | 43.1696495767273 | 42.1887890806988 |
|         | 64.1267046511632 | 37.0320432433314 | 39.7631425193874 | 43.0456011922275 |
| MET     | 51.8781065691038 | 39.6123051184545 | 54.9071823326024 | 34.7266486944713 |
|         | 41.1868052124344 | 36.9060997041453 | 44.0687697278114 | 41.6466169548846 |
|         | 46.6944238390932 | 46.325232414659  | 46.4205654140754 | 58.5478485621444 |

METAP1 367.808375988242 835.171475474151 767.489657259345  
265.930422462959 543.454040390679 490.301992866742 710.831173303701  
396.355023788839 1029.12917222294 861.729405234231 945.065986430527  
1132.19026676901

METAP2 400.506633704584 504.281506941044 554.163106145921  
421.013324906569 663.372296297652 696.113365766871 915.519281747943  
459.546279672649 610.502562878788 637.824136761292 522.811631783729  
597.996273468244

METRNL 95.4841914842335 53.565717255469 75.651446553407 61.7502624458447  
104.914715637173 102.020047144427 45.7452456977857 42.6450179841129  
65.644767142472 55.5206840401643 59.501103909345 56.6146179789815

METRNL 210.524799041662 148.925503526873 82.1809804715696  
329.978705095448 145.72829095462 303.818507395434 142.880684604126  
362.724027984972 195.790389809892 121.064136717339 136.613915120582  
121.53258696581

METT10D 52.6960621424156 53.4735821194294 71.7336217321663  
42.6913548400127 55.3100442506299 74.0995052892511 57.6643188499117  
47.9942520395434 50.9010149857308 54.2830238965339 60.0765286625112  
58.7382738968248

METT11D1 174.961427864327 124.890309370032 130.585540374294  
96.3120603627576 185.94424664238 110.869341159607 121.945468001236  
74.3135387703106 137.658868649032 130.62791061956 129.909461876076  
102.797268694325

METT5D1 43.7585538437696 50.2696827764943 36.9795961564828  
37.4223289687135 35.6434124419782 39.7394181011603 42.357910063876  
36.0306975524309 49.9951674107458 43.2988017098387 45.2265319826548  
50.7487159427973

METTLL1 58.8856060454401 53.6895401581575 48.0191002461099  
49.1786207920603 59.0460742359145 52.1283726483563 54.9765783642973  
79.5531316151328 66.0979829658877 53.4109882045447 56.1754317648502  
54.629382710848

METTLL10 47.0940613507321 42.1372626664516 44.3344900481112  
43.0016969050339 44.5092684716474 46.4648868771662 42.7431359850339  
40.3691324547049 44.293922970134 44.3303034026662 41.6657053704762  
43.1805016690297

METTLL11A 92.8026641003757 72.4796479443344 48.6494451061637  
65.8926843080114 75.2391243965793 67.1729762600915 67.4534389579576  
54.1337783761257 61.3216070188812 46.2286164776607 55.5567699051046  
61.5948082043061

METTLL2A 43.8582747295766 45.4882438975269 43.7085219318425  
42.0102671859606 47.3791873993182 43.3785777889265 50.7502704822135  
44.293922970134 52.403135056701 41.5804111566887 46.1390887492649  
52.0359304386476

METTLL2B 40.9558083259517 38.2263227947189 43.0016969050339  
46.4555908533915 42.7107928951766 45.8325181856483 39.4600924554505  
42.6450179841129 39.0775870687758 40.6022003765153 43.6629145624937  
40.6614700944853

METTLL3 300.703401968169 220.743173420176 237.754990288051  
142.48688219605 295.312692092025 151.99110418225 175.41042153356  
157.281394920992 157.082769443568 196.735144093998 203.586637054746  
260.093838596699

METTLL4 78.3851687801705 80.7664399131413 104.250582652805  
91.39670444940546 104.220256076979 85.8059456975413 102.993620677265

67.8061298261394 83.5069968129733 91.3941563889513 94.1247862405958  
 88.0186381834147  
 METTL5 260.185079572615 347.420750861056 325.990132666873  
 208.553134986809 372.525928228911 379.933650669101 229.792906003602  
 197.515728627482 266.905855859261 188.042978085327 207.768377497439  
 373.914455300185  
 METTL6 42.0532901689036 49.2050538150106 50.5089777244781  
 51.949834638817 51.5888395924843 48.9826868640753 58.0969258817391  
 48.272324215504 44.3440839686558 45.1569741609597 39.6403089864678  
 44.5432192783161  
 METTL7A 58.4920021605316 167.430013807712 109.594402843796  
 72.89602312859 83.3905516293346 105.814959179397 113.477848709768  
 57.6684494624163 151.425712904293 230.787791652978 201.301705082976  
 151.641746442323  
 METTL7B 51.6558970571712 42.4493032770053 49.8344973836834  
 296.753500238226 77.4769634299218 42.750861693377 59.0457625163577  
 113.655306804539 88.1910986077499 41.6373771565199 44.2142581488029  
 43.2776458914333  
 METTL8 40.7609952437622 47.2770121962655 42.4580504587581  
 42.0102671859606 37.6527901109005 43.2805590023412 38.6243997507646  
 40.3357777530419 37.4540772310118 47.7180816682562 45.310660704531  
 47.1060577218993  
 METTL9 60.9710783023013 63.8949010662614 65.1185966859561  
 69.1239811245312 54.5683518971261 63.2343637481705 54.0170817319522  
 52.1062000766427 59.4236178078244 74.8706881113318 64.5347406608537  
 75.4935574755043  
 MEX3B 78.6100656626189 62.3102413989199 42.7303139017786 55.6481366056639  
 54.1225249245036 50.0748292497578 66.4258159334241 59.220967994972  
 41.863927676552 41.7405682794166 44.0409178714232 42.4607795638552  
 MEX3C 96.6833301748676 108.213380368446 81.382229980722 100.606802642042  
 74.5758811681995 93.9228336493696 91.5258329186709 102.380096190518  
 131.517202728816 88.2056147099779 84.0305689846475 93.955760127914  
 MEX3D 119.591054636527 101.020328028769 88.6771566133367 50.0526763693329  
 172.574996256912 90.99086730704 141.630277976624 129.605603092944  
 149.09682467711 63.197604174872 86.6798536307388 63.3578893149245  
 MFAP1 116.103491885674 102.150058925164 77.9085946827079 116.122324921267  
 131.156876010639 146.931674964658 129.414877519657 93.5358142196619  
 139.847976281228 99.548445157506 117.282216847547 156.738940207775  
 MFAP2 106.582060920252 61.0144918827511 46.4053780043903 45.9379019161109  
 100.386011517899 48.5063609713076 81.454335582503 41.3506832276112  
 74.4365426051588 40.1537043758608 42.5153507543837 38.5279745308203  
 MFAP3 70.6065558064758 64.0903425729408 69.11736279512 74.6159297822533  
 73.2607982527105 67.0290776715331 48.3411413510851 61.2343203799193  
 85.4420599474339 58.115198353247 56.3106156221316 68.3234331335073  
 MFAP3L 44.7463386786906 44.4772114267866 44.5432192783161  
 38.5855564939014 43.2484996523549 40.2033449684952 49.4641002049227  
 38.0268447621448 46.4499258373233 49.2241081794288 44.4688999098904  
 46.2625470410195  
 MFAP4 628.403814060213 294.966924715506 96.7948977485109 569.377890112069  
 257.194689822426 2004.94135236716 43.0930293831497 402.978328664331  
 59.2566572428546 1401.46625360427 2009.75680599899 1059.63540694644  
 MFAP5 404.356143472409 54.6089451252049 38.1421709520616 59.2778887402357  
 48.5000946421718 1524.01520893763 44.3440839686558 46.5717043290731  
 35.4332080966594 1273.52492984569 400.8670859408 1137.43995129921

|        |                  |                  |                  |                  |
|--------|------------------|------------------|------------------|------------------|
| MF     | 54.5358897781765 | 57.2871072823547 | 50.1860191642359 | 56.2508140932179 |
|        | 56.1186281675573 | 45.0882356578404 | 48.6395795163502 | 76.9373289454707 |
|        | 38.5252456306656 | 70.4895190282848 | 65.2295773603116 | 72.9580216367379 |
| MFGE8  | 3217.83121827744 | 1126.31998762007 | 910.898566308567 | 1119.61164710566 |
|        | 1457.72260892651 | 3001.25236839028 | 560.413725186282 | 968.405745860353 |
|        | 337.013669560645 | 1521.20630233299 | 1824.79010714035 | 2124.40034922306 |
| MFHAS1 | 55.3153799233744 | 47.1332119496722 | 49.9256753636167 |                  |
|        | 53.3967242431461 | 47.8075998240396 | 54.1440452292081 | 53.1884505015411 |
|        | 52.407151732257  | 49.3780606970538 | 54.6089451252049 | 58.133863696399  |
|        | 65.3585701203568 |                  |                  |                  |
| MFI2   | 43.7228551318284 | 46.1749315148684 | 43.1709743883785 | 38.8025302527057 |
|        | 42.7107928951766 | 44.6085311049673 | 48.1196483432815 | 46.2779564481158 |
|        | 41.7627910693483 | 42.6211340086915 | 45.1735152121056 | 41.9721968713295 |
| MFN1   | 52.0756619340684 | 46.8603024029835 | 55.2141529491512 | 48.3772965749984 |
|        | 51.0107745412152 | 55.7197525213035 | 55.8510296341925 | 51.1293275125104 |
|        | 55.1804535845496 | 47.5543691541633 | 48.5835484742456 | 48.8319884367456 |
| MFN2   | 175.271140689255 | 153.901083585889 | 201.236491769447 | 200.790001763897 |
|        | 219.431561967403 | 329.978705095448 | 207.768377497439 | 286.497342437243 |
|        | 227.94699237549  | 308.025419469334 | 343.828445728322 | 259.958369064691 |
| MFNG   | 63.915453398266  | 148.016994658777 | 90.3485862002091 | 243.898313340098 |
|        | 59.5844022026141 | 108.718422641679 | 49.8281348927244 | 57.8765910878975 |
|        | 51.6731332961917 | 60.1466326805616 | 78.963270461629  | 69.6021553604792 |
| MFRP   | 37.4554876386402 | 37.7384958256497 | 41.3366779545815 | 37.651298468202  |
|        | 37.5556299264699 | 34.5886782974123 | 47.5963750520409 | 45.642304356051  |
|        | 42.2577689927563 | 39.4710743516517 | 35.1470994647364 | 40.1700117452801 |
| MFSD1  | 311.241353755918 | 275.061444728555 | 308.931677425404 | 706.087945508248 |
|        | 287.689260887067 | 341.078728185917 | 223.970572361745 | 342.146013966482 |
|        | 243.843941346211 | 330.550018306903 | 320.684862879691 | 313.174026684189 |
| MFSD10 | 689.738256133922 | 1621.89443989657 | 1405.20888023653 |                  |
|        | 846.773659307087 | 1110.39060103557 | 592.010988342149 | 1219.52011418558 |
|        | 923.470702344816 | 1303.33517942343 | 1470.84169670955 | 1689.77066894108 |
|        | 1249.78418100778 |                  |                  |                  |
| MFSD11 | 314.533750876361 | 189.344003908074 | 216.1413998895   |                  |
|        | 276.666571115104 | 152.456314990408 | 141.364814429951 | 226.785831708938 |
|        | 612.441960343995 | 183.690616959682 | 544.946796643478 | 472.522115719366 |
|        | 351.764130340952 |                  |                  |                  |
| MFSD2  | 54.0990839134272 | 72.0112676564347 | 88.4897895318663 | 63.1604223919703 |
|        | 64.7488184936482 | 48.9826868640753 | 79.7564155881026 | 80.7067505750848 |
|        | 230.09336914921  | 48.9826868640753 | 53.0177144132449 | 57.290967307936  |
| MFSD3  | 405.674543755994 | 459.182372959714 | 446.613670519745 | 178.624349589089 |
|        | 658.282562295783 | 118.899737794318 | 202.983984966874 | 213.933347509147 |
|        | 417.201611973051 | 282.646286144563 | 270.036719921343 | 198.129308943666 |
| MFSD4  | 41.0871827071116 | 41.2276963324981 | 37.4642807402741 | 38.6414316877471 |
|        | 41.6285300488826 | 38.6414316877471 | 41.2884376047238 | 38.610211769318  |
|        | 39.9444191873552 | 39.7835513496873 | 37.2523512295476 | 39.4490233720848 |
| MFSD5  | 331.173265739654 | 292.600202149564 | 428.206419080492 | 231.154569340492 |
|        | 210.50519205965  | 121.86893260878  | 210.096514889445 | 425.026540236907 |
|        | 472.752186426584 | 247.843927763772 | 294.155188719236 | 198.010793115588 |
| MFSD7  | 63.6767189846426 | 64.7650773032999 | 49.7350276169552 | 76.2591822114739 |
|        | 47.2074332636566 | 53.4466111440611 | 51.1541843174981 | 48.5681478665796 |
|        | 44.3440839686558 | 55.6865353018811 | 70.4204944097269 | 47.2131144508464 |
| MFSD8  | 93.4355842714864 | 156.719353642505 | 134.725028732282 | 128.38299874379  |
|        | 123.04622719856  | 96.034706957068  | 95.2218627805387 | 115.691017747672 |
|        | 106.042585997437 | 107.015362116555 | 103.199200862158 | 99.1769280484821 |

MFSD9 43.5710871617107 60.6548851977964 48.4890615340603 44.265834798964  
49.32293280121 40.8634043028528 43.8206425661746 43.6434576713809  
43.9450023643394 46.0119912782855 45.6348103033479 45.7562276914441  
MGA 64.5093306432163 59.9682734755814 49.5839230147011 72.0694688774804  
67.6011992144113 58.6439719071099 61.5000955267432 66.2366101899356  
64.5347406608537 70.9196764450443 70.2215218476683 64.6008211424158  
MGAM 39.6609238036815 39.8469121706726 40.4412246793572 37.9875302985336  
36.9253036131655 35.8227939208521 39.0831492773955 37.8301850201237  
35.3674823422363 39.3957535885631 36.3390947880186 35.9604262434141  
MGAT1 964.268294825556 1242.75259587926 1317.29255644089 1731.19220270448  
1537.76265834076 780.708896888794 1325.2479053325 3379.67054115975  
1035.67547271468 578.601842980701 684.238999553691 515.856807472321  
MGAT2 91.31756001203 106.325616923861 104.950400251642 134.749803376372  
84.7947249929138 91.6876038082112 77.0514384834854 82.034818940429  
99.9619062444102 63.7156457274317 67.3439996689706 94.3623147001749  
MGAT3 39.266565827316 51.6869155634183 37.3687900733549 44.6905691366696  
43.004943518025 46.4648868771662 40.0052661202207 37.6557714476853  
36.0741672064298 41.9097689475185 42.7275315121163 40.9149601380325  
MGAT4A 114.796237914478 85.6763929745253 102.734042853587  
241.384699095468 71.5345397102823 64.2174369755376 94.4618437533343  
346.116601612353 70.5699797830702 61.5635554619635 55.6972661824064  
62.9904770954043  
MGAT4B 70.5534237141767 93.299474822664 100.671408579579  
83.014860007187 127.676574457297 68.9067462941376 103.657181265842  
83.8419777255838 116.461730749198 82.6709662235238 83.764882413379  
83.5646728968172  
MGAT4C 38.385865183581 36.2561152084183 38.0057289062111  
41.9620007529243 38.514058966346 39.1664256481434 36.2561152084183  
36.43924066428 40.6957787921451 35.7932456011041 35.5179217192467  
34.9676520699756  
MGAT5 59.220967994972 55.2182004838121 45.8844325913247 55.0604256312495  
72.5027069303875 47.8636003588181 45.1017494688414 54.5125550937898  
55.3122077514658 63.9129423266349 52.902043370862 53.840976437122  
MGAT5B 37.7384958256497 37.1685072112618 46.4150464549477  
40.0322420615846 44.0451487108213 37.2018803984555 39.6535880152834  
44.5029690493211 41.8197029429821 40.6533975461148 39.0788811357542  
40.6216891610774  
MGC102966 183.690616959682 97.2803806915572 243.803668806533  
90.5216273844682 64.4999048115671 51.3886035574416 64.232967574797  
187.560170529807 85.8154958329408 65.6721629145797 58.8188963227059  
58.9836017745712  
MGC10646 46.8954576545929 43.5182502375207 47.2055133646385  
42.8235313007746 44.8897737954573 37.8102105794655 41.706879587091  
45.4757965005055 42.0621425894624 42.9866214102525 42.4580504587581  
45.5800840647989  
MGC10701 40.7609952437622 36.0366673493555 42.157627240486  
39.6292788039793 42.3685136297603 38.3418933808844 38.7337086062875  
39.7509165247419 40.5912213523345 37.7315666632629 44.0409178714232  
42.1537476443423  
MGC10997 454.02808608679 331.087219418047 368.078954546259  
485.698327133705 395.875593488613 285.187681119318 324.320137371059  
521.546082699431 379.098697147575 432.945510073269 403.664724682094  
341.206585871289



MGC119295 31.6557652929457 36.5219488315447 30.1388203764747  
35.49696651597 38.9496515344837 37.1317006162938 41.5817737564592  
36.2539950294089 37.5469247328848 34.5718473203083 36.43924066428  
41.0657892043496  
MGC12760 64.0759817636265 59.0709442090059 67.235655687817  
65.8926843080114 53.5594683028749 49.2050538150106 58.3675164086197  
68.2309359831273 47.6195009345747 68.1674425673171 71.8314470868658  
58.9836017745712  
MGC12965 44.5282181324797 48.7847528954724 55.5567699051046  
40.5484717678957 53.1884505015411 45.4882438975269 55.695361644141  
49.2019743609873 68.6379135603075 48.3693338695392 62.6885730386156  
51.0013344286851  
MGC12966 197.259755509929 107.466490458133 147.34358398245  
104.528976428975 195.968119243879 116.9812483023 100.386011517899  
133.810601514962 151.686513723244 100.671408579579 103.252085427319  
129.76138655102  
MGC13005 44.436995101921 42.6450179841129 44.0451487108213  
46.9919960628953 54.5683518971261 40.4359177791566 43.7585538437696  
42.5435283762933 45.7873395324682 43.0919221375514 43.9063490244748  
45.3267183347084  
MGC13057 70.8288090024328 52.502055890816 45.0985088502363  
64.3746985855249 84.7169030000296 64.7905331739366 50.0088611244948  
40.8833572570383 51.1541843174981 73.8313212063649 56.8056093987178  
73.8203293439022  
MGC13098 41.9407041937973 44.2630383225933 44.6032218589199  
43.4410741327254 41.9842695818285 41.7627910693483 34.5633623842083  
44.8997235283254 41.9635525160083 39.8873706855774 43.0971787292711  
51.8562635270111  
MGC13168 53.4921736109774 48.9259041798949 49.2041300973417  
53.0284011078097 49.32293280121 53.6858208094027 52.561573697155  
46.2779564481158 45.6582729799009 45.1569741609597 46.824299585607  
44.5432192783161  
MGC15634 50.7390160399184 46.0023068797812 43.0016969050339  
47.6687908290818 44.8897737954573 48.260931742163 46.7100796279384  
42.5435283762933 43.7630587657205 44.1379638573455 48.8088340735921  
47.3992733452821  
MGC15705 37.3463875295726 41.4508241771315 43.5710871617107  
42.2496337895968 47.9128504683618 41.554942319225 43.9450023643394  
37.33030683349 45.2897806651929 44.571915452417 45.310660704531  
41.7575097298927  
MGC15763 48.5835484742456 79.3971417347713 67.1299518044849  
69.1931891474114 118.951970882732 61.8187341713197 90.0682241853516  
69.8941497035747 68.0796261751272 42.5664883002833 57.5430365699386  
64.531467526747  
MGC15885 41.6354649482853 38.9338521051669 34.5718473203083  
36.6501141438378 34.0927410219282 38.6414316877471 43.8206425661746  
34.6977013306396 39.6609238036815 40.3235655331796 41.6336636285875  
36.064718696392  
MGC16025 41.7397731376692 49.2934904960601 44.0451487108213  
49.3654837541353 40.7779767565889 41.554942319225 41.253645578517  
39.853866204927 46.0106098064475 45.7911932481722 41.9908237694988  
39.7411455670172  
MGC16075 44.3355304829989 44.9370339275041 49.1067959632109  
54.8412943008635 40.7779767565889 42.357910063876 44.9863726205428

44.5029690493211 51.5229124652769 42.3606390470387 44.1148826235374  
52.2832912331043  
MGC16121 151.936097714553 83.8850034281243 94.1206342908306  
75.4466520363487 112.100074154279 55.1987351219665 50.5252048155459  
42.6450179841129 65.564930068976 47.4767851750188 51.6414075056938  
49.8253396161069  
MGC16169 96.2248868829355 143.233722839451 251.184621899165  
113.528908699366 102.913039837094 167.848222139162 96.2959923858457  
132.52749757795 156.242688079359 135.007055711266 148.32293918881  
212.803471204964  
MGC16291 36.2496364442264 42.4493032770053 37.9482157381008  
43.5627649099623 38.8456942580061 41.2567470068038 42.1607322031054  
43.3262148375525 54.8946088631931 39.0648733099061 38.6662194645633  
39.9519547348106  
MGC16703 7127.13565491501 4216.69417265779 5387.08056045279  
5018.90384962952 4299.4451139256 2903.00880209344 5479.94045861143  
7168.83136860899 3681.41904661708 6749.14636741447 6483.09366281532  
5387.08056045279  
MGC18216 87.4335749014848 73.1640951333742 62.3245608177257  
65.7321440516177 63.8315840603904 84.9099930524863 35.2163900400329  
58.3046521633424 64.7116910405493 123.704998437432 101.832945816193  
133.69701250532  
MGC19604 45.9090659324223 42.4493032770053 45.7968648044613  
50.8567345921473 41.3755760434934 44.3648993568405 42.7431359850339  
44.7044140979108 39.2809305246091 41.1222709786153 48.3847843498476  
42.9887069977696  
MGC20983 48.6621527194963 47.6914221838216 45.6989664108554  
66.5921967967793 38.5512429290626 46.263826584899 57.51482768194  
49.9332280449549 45.0997987980157 40.6022003765153 34.064698871541  
44.7401523707775  
MGC22014 41.3387790895716 39.8455060654531 42.7303139017786  
42.992884918158 42.2455707947223 41.5132248356707 40.4941260038116  
40.1474543172332 42.846832824953 41.6724739851995 43.9063490244748  
41.9083581529276  
MGC24103 186.301404367238 47.4076235350059 50.3950981988762  
139.385367339095 52.3242437351389 147.033637977077 115.691017747672  
123.022511916727 48.9931786790166 148.570371099987 143.973063517706  
87.5759422500374  
MGC24125 37.7384958256497 40.9731067463382 36.0306975524309  
36.890925044696 39.5595233162192 38.5252456306656 39.1539892144371  
34.8949555140527 36.2733735494625 38.528621456378 40.4504608195666  
38.745552403895  
MGC24975 64.1882546112044 74.2653431904071 50.6004078448405  
42.5664883002833 64.6374507338031 47.5733603903505 51.3064929551674  
64.964255000378 77.6496445815897 56.3441077510744 53.7475011049549  
57.8111054584154  
MGC25181 41.2424637338424 40.5400384479766 44.3344900481112  
42.1273928203021 38.1644569189523 40.244271403831 39.0458123429605  
36.7460922671619 34.6720534245631 41.1222709786153 34.9428206949566  
41.9430737035925  
MGC26647 36.9060997041453 49.0697565324841 36.9795961564828  
38.2041059863839 36.7356360093603 40.650742261428 38.1793598983615  
42.4580504587581 43.1805016690297 36.2435874904689 43.0971787292711  
40.5703581862752

MGC26718 38.957687788868 116.295564219236 115.530384771495  
58.9168466928565 55.1563703466328 42.750861693377 44.0687697278114  
56.3560498705517 82.2694707335812 160.187478921145 98.3322659713024  
169.554408876006

MGC26733 35.5179217192467 46.29198852834 42.8270038153139  
38.8495095797881 43.5544347011646 36.2768299545794 45.1017494688414  
29.633229264005 35.0305278582179 39.6719190054379 48.9754340235127  
35.6427313468066

MGC27121 42.7150227340364 40.716553247236 44.3344900481112  
45.8844325913247 41.2740822675592 38.2293008890613 40.4359177791566  
35.0510338774593 41.9635525160083 37.7315666632629 43.7585538437696  
37.7526485343328

MGC27165 38.5007204246293 44.1239711172417 47.0940613507321  
49.9014504704021 42.6022652963326 37.5887129572848 38.8417151851134  
41.1575777497576 41.3803269429468 39.5637454855233 37.6484782516569  
38.9496515344837

MGC27345 46.3390850717989 53.2046867327331 48.7039705048129  
37.651298468202 80.257554904218 59.9876575158981 47.5963750520409  
48.7814131120945 64.2174369755376 58.5087296620514 65.6824363141962  
62.6868461044048

MGC27348 47.7267190613906 42.6939394537076 53.0630927250439  
45.7397504535169 63.4753448572245 47.9503724044453 53.8687221233237  
45.8669209716694 51.4413099192899 40.1179210534118 44.3763859390287  
42.7782216342806

MGC27382 34.4021554788966 38.3322849790657 41.0356368374708  
37.8442841690502 41.5668884168669 36.1190722948669 38.5066108855005  
35.7973685350741 41.2870505273664 33.1559412791294 34.4716904283753  
40.4639532172338

MGC2752 54.5358897781765 60.8608693323868 62.3936376596431  
53.0284011078097 64.0752803796842 51.6053353177789 45.4799270968969  
49.085741080241 66.9499465764301 70.4895190282848 58.7389869173495  
65.2125527940945

MGC29506 60.8357760968871 367.685570437603 207.087723777954  
1588.70376317303 42.1650127805175 47.4699236780425 66.8475050031365  
88.4439480366515 49.8304479381623 53.9412154719864 42.4580504587581  
34.4570158133896

MGC3020 70.083473392272 126.911056987607 134.952392466784  
74.0093517743852 201.764909400617 75.1674447943072 113.322929203297  
148.595294991115 63.6222532132037 87.1434190022564 108.022329297132  
85.0113628886031

MGC3032 50.621641072744 45.2556760873335 44.8872784170036  
45.390192977585 47.6125796208753 53.3185097662527 49.9162522057712  
52.6529161327083 43.7052389230253 45.2009392669842 47.5673419710251  
47.9566297250148

MGC3196 70.083473392272 100.774098314706 87.9152471471338  
74.0093517743852 109.398472684587 71.3932787152381 136.155022329495  
94.1289383735162 87.8081021392626 75.4392126686957 93.8495757442027  
75.2923395421694

MGC3207 106.752660061588 325.450452751375 205.898127436939  
157.312247745825 396.93169345515 182.551901102169 175.28322146764  
149.173801572239 252.775631043952 213.309547409053 247.547769833089  
304.258586051126

MGC33407 39.266565827316 42.8542642792862 40.4882741869718  
39.5050383901884 38.9496515344837 41.9543948167375 37.6036146841933

38.5457716679071 36.9060997041453 38.1042454705119 40.547835538778  
39.3575468494941  
MGC33556 38.0089018744739 44.7829632472754 46.7508829977587  
86.9274372004388 42.9090346219023 41.0582900711341 53.1884505015411  
45.2806199505029 33.0463640202858 47.9056710878325 43.4709415392696  
38.8495095797881  
MGC33846 42.8036731479932 46.0023068797812 57.7415362494584  
39.9697332660833 44.4489662507893 43.0860383229288 139.177720567217  
47.8947595316832 196.355909140782 202.529846569324 156.08027400493  
115.229070906222  
MGC33894 39.1590964332473 36.9994058279362 40.5734458834617  
37.4223289687135 40.3452320167286 37.4782441311626 39.8695929627783  
34.3865306339645 38.9006788676407 39.7835513496873 42.6366765186182  
38.8495095797881  
MGC33948 55.7246872330059 54.4190527512508 55.094385444315  
55.2214187655851 53.5594683028749 47.9503724044453 48.4859552186772  
51.1694248620208 55.0748878261048 48.1392888470269 52.902043370862  
50.5511827666954  
MGC34761 33.8558232866797 46.1569135229922 39.5450079747895  
39.7411455670172 48.8381507187986 48.9826868640753 43.8206425661746  
37.5511560880902 43.2761454096265 41.5435611403119 44.7114813656401  
40.5703581862752  
MGC34774 39.3709357615493 40.7952353240579 40.4070046183108  
41.1886975241176 40.0599807618105 43.5752393599169 39.4600924554505  
37.9837233601316 41.4636047919453 43.844855336215 40.723990462047  
42.9887069977696  
MGC34800 40.6559419616644 38.3322849790657 39.4710743516517  
42.9358255168086 43.1252272136667 41.2567470068038 38.5066108855005  
40.1474543172332 40.7847110517594 37.3179578037963 41.4508241771315  
45.0035308952466  
MGC34821 38.957687788868 46.5650556481721 41.9666541498638  
39.2780515621926 48.8381507187986 39.0266821712099 43.0930293831497  
36.8400213077707 37.7384958256497 45.6868589181768 39.153226699662  
45.1735152121056  
MGC34829 43.2724556187214 41.4508241771315 41.2365089689635  
38.0958223740111 46.0977687311222 41.3553369544097 40.3302268293707  
43.0390857698452 50.0526763693329 44.3648993568405 42.911855821602  
43.8575940017119  
MGC35030 37.0320432433314 39.7835513496873 43.8495248991589  
43.8002456102021 48.8381507187986 44.6524308640784 41.0381860307445  
42.9301944191913 43.8482802038826 43.401782064778 41.1638563416981  
43.7672102682067  
MGC35361 56.9360840563854 66.3026572113793 74.6514558411477  
52.039360725793 85.6582555450821 64.2174369755376 54.4313108506244  
63.5295088521896 61.2070368742244 64.1097859982912 65.6824363141962  
62.6868461044048  
MGC35440 40.8681871019812 39.8695929627783 38.4043916290561  
44.4367387274922 45.4751076037511 40.8634043028528 49.3854238365325  
93.6124140212565 33.3643994200057 36.6893251782922 46.824299585607  
48.1627097465883  
MGC3731 326.500804513133 390.202312411165 605.970682363975  
395.634889855838 495.359878931451 218.478561986088 592.399245288911  
352.600793906035 502.32041794318 410.257694738546 329.437593022939  
293.300203370043

MGC39372 44.0328992213727 48.3077814647455 49.3780606970538  
55.0604256312495 44.8897737954573 45.4882438975269 41.5817737564592  
46.695848687694 49.641159251878 42.9866214102525 44.6286581923295  
41.7575097298927  
MGC39545 38.7537364570873 41.159706131351 42.157627240486  
43.4410741327254 41.7929491793697 45.9266745571724 40.6750540874299  
39.853866204927 37.10170285405 48.6124127998952 43.0971787292711  
41.3481355128089  
MGC39581 39.266565827316 43.9421822132391 41.1367478979484  
40.7481155008596 42.3685136297603 49.8472708021525 43.3262148375525  
45.2806199505029 43.6670755115848 41.1222709786153 43.5710871617107  
42.8864415494484  
MGC39584 36.5393857306744 37.10170285405 34.5718473203083  
31.036133494654 35.9894133432376 37.5887129572848 34.2773859804062  
31.9468644542969 34.9428206949566 35.4990901121893 35.860430241131  
34.1509644696334  
MGC39606 43.844855336215 37.920964499903 37.1643693306382  
34.3595588146954 37.6527901109005 43.6670755115848 41.4742337714895  
37.7612949798895 35.7973685350741 39.1621898366355 36.3390947880186  
39.0536056496869  
MGC39900 72.6647497338347 75.9236575152151 50.2869791217819  
58.2491793807176 99.5192591352063 78.1351673826829 208.097209050425  
265.570814613305 98.4156120426377 62.3556396662215 62.3285777410103  
64.893664076381  
MGC40069 44.7915315085948 44.2105195734073 42.4580504587581  
41.4273122914951 39.859345745831 45.0882356578404 43.8206425661746  
37.6557714476853 39.6609238036815 43.0919221375514 37.7384958256497  
41.2437378488025  
MGC40168 51.7607563002005 34.8137085420423 39.7411455670172  
33.1817617228171 43.844855336215 37.8102105794655 39.8695929627783  
36.0306975524309 37.6383530120621 34.7308008643142 36.0481934423077  
36.7762265039864  
MGC40170 42.442231667357 39.3999056968598 45.063792968927  
42.9358255168086 36.6354013629791 39.4953494583071 38.4005795891396  
36.6452480995946 40.7847110517594 39.5637454855233 44.2925355984056  
45.6692241948108  
MGC40489 71.9062462001972 83.6000059297772 68.0649030501515  
57.4595416719581 98.8821018441815 54.400905818898 86.0796981361148  
71.1163541406788 101.187156681366 44.4332474869068 49.6706535876636  
48.9088046212958  
MGC40499 45.6517320730042 45.0905928998779 39.991353369336  
47.0874209746031 43.6587492470348 44.7804080899431 47.4439407315335  
53.5271601314404 46.581796165231 47.1001757441025 41.5421429082231  
46.3411353377615  
MGC40574 36.3649677956953 40.7952353240579 31.9895827886879  
38.9534635879195 41.1868052124344 34.4896350146096 39.4600924554505  
40.5158867964016 37.1820543575123 38.2069499294002 45.8180710486329  
34.9138625012006  
MGC4172 133.453860783605 190.30941883755 262.735075993242  
52.6947911480086 419.652892824029 116.066916521887 222.696947669812  
162.401599565682 318.369837408344 129.951091959262 142.309369995384  
133.576489624155  
MGC42105 41.0608773166058 37.920964499903 47.646800205189  
42.0102671859606 50.2163892855092 43.1826328292558 44.4639405506967

39.1652965788406 50.5785738734431 48.6124127998952 46.4753015651202  
35.1451084093692  
MGC42367 246.624482943842 221.163225922749 268.54298415337  
238.616000665585 99.6821042055758 96.8185145589133 216.606583011866  
590.139974503603 209.438270055157 103.707931766117 151.111664091983  
102.49785018292  
MGC42630 50.379587451669 49.6841415268611 45.6989664108554  
45.8844325913247 57.4163094213712 49.3172204533818 46.8613212048981  
47.5950227477807 49.2879849674517 54.8979897528792 50.5810338885769  
50.5511827666954  
MGC42638 43.1805016690297 33.6902293666089 42.0621425894624  
39.9697332660833 43.2484996523549 38.3418933808844 39.0458123429605  
38.8495095797881 37.3600014814388 37.3179578037963 43.401782064778  
41.7575097298927  
MGC4294 43.3638918705225 39.1982470626863 41.0356368374708  
38.8495095797881 36.3390947880186 42.4580504587581 42.629412460409  
41.0381860307445 38.8271346375425 37.6383530120621 43.3085358214154  
42.1537476443423  
MGC44328 36.3649677956953 41.7337506166619 41.6977706798234  
37.9875302985336 38.9496515344837 50.5148383400703 45.223075311113  
42.2577689927563 38.3418933808844 42.2614524730856 44.0409178714232  
39.8497227447888  
MGC45491 39.5676051939342 32.8881500803623 35.2838283525874  
39.066284740632 40.2449343247539 34.1806289878747 43.6753843488695  
40.1474543172332 39.853866204927 41.8613406887824 35.6970528713709  
39.5418280570561  
MGC45800 45.1912496459517 44.5884811528117 43.8495248991589  
40.9607305725196 44.9936360641969 40.4359177791566 38.6243997507646  
41.7419877611072 39.6609238036815 38.2069499294002 42.2618615571566  
39.6352613956998  
MGC45922 43.1805016690297 44.0409178714232 41.9666541498638  
39.4569929845912 40.2449343247539 40.8091178323174 42.5660695551615  
41.0844534776541 39.5806465938526 41.4812544772644 41.4860822396574  
40.716553247236  
MGC46336 43.1805016690297 39.3999056968598 41.1367478979484  
39.1706564265495 46.9906120932727 39.0266821712099 37.830876898596  
42.8482181313226 42.8036731479932 36.9102644736882 43.3085358214154  
39.0536056496869  
MGC4677 334.170764774986 199.294913752704 286.996922972683  
747.577738135496 153.797431763616 104.492750153479 136.461760992832  
226.882600557693 89.9580440276828 106.816835590007 87.275548276476  
90.3188163079532  
MGC48628 39.3709357615493 38.1312950900467 37.2838080935695  
41.1886975241176 41.467005949568 45.9266745571724 38.0598374201407  
38.6454098044474 37.2810767789306 42.8936990772838 36.131485826118  
37.0953622406687  
MGC48637 41.678190413467 43.4667754607514 42.108130037421  
45.0017158586743 43.5544347011646 39.4512099697623 43.8835874380262  
44.7044140979108 45.0997987980157 42.8936990772838 44.6834648302383  
45.7979032939211  
MGC50273 47.0239604970019 40.9731067463382 41.3708420203838  
43.5627649099623 40.8873907150245 39.132725377815 42.0605906240248  
43.0390857698452 41.9635525160083 36.9848592422398 38.3166554965434  
42.7782216342806

MGC50722 50.379587451669 48.9259041798949 46.0727230219512  
49.1786207920603 47.3172462673426 44.0804700754786 44.2166118829877  
49.5185112777773 45.2897806651929 56.4553747079294 48.8744644207821  
45.4799270968969

MGC51338 40.2543341073001 42.0709558258414 43.5710871617107  
38.5252456306656 40.148780650831 35.0970060242246 35.4623691645629  
39.7509165247419 42.8036731479932 41.5435611403119 43.0971787292711  
39.8497227447888

MGC5139 42.6036491382658 45.8669209716694 49.3000844711116  
36.890925044696 36.9060997041453 44.1737502492846 36.197424053556  
41.3506832276112 40.2274522635576 43.844855336215 36.6298807161755  
45.0985088502363

MGC52000 272.746328542895 386.372142079981 305.476842356935  
187.189412320761 383.578947165143 206.768099707991 292.007249571558  
792.022171185649 170.150808455621 320.330057050615 332.322497133752  
277.325795311848

MGC52282 70.2541961995753 42.6939394537076 47.646800205189  
44.7980740332174 40.0599807618105 41.4508241771315 35.6056062164318  
40.5158867964016 32.554751989205 37.0320432433314 39.3667161654772  
41.6550823405646

MGC52498 46.5549623118323 46.29198852834 45.989212296035  
39.2780515621926 48.9627346956003 44.8872784170036 39.4600924554505  
44.0390019242862 37.2810767789306 46.1390887492649 44.2925355984056  
44.6484005362281

MGC5457 59.5000730792772 47.8400694856726 63.7744603935682  
44.0451487108213 42.1650127805175 56.1671440556142 48.4859552186772  
50.1833483241864 48.4869909888679 65.2361525412756 60.0105984819248  
51.138877923954

MGC57346 90.5860767851498 101.131391476546 85.271985416622  
55.0604256312495 164.813928846511 82.1144251872199 115.256208610595  
87.2437977005922 112.230023772979 101.832945816193 86.500678864429  
86.9924799927707

MGC57359 43.7092039025007 40.5940318808889 40.5413646076771  
40.6857324478814 42.6022652963326 41.2998796628207 43.2582066331698  
43.3685089934634 41.1367478979484 39.6179442114178 40.2649309204478  
40.5332007037237

MGC61598 200.566335168667 137.424708183613 225.35760689842  
61.8997157694697 288.869882644391 115.861269747317 73.8313212063649  
83.7019398654324 81.6508259258669 224.749607192071 144.954155897343  
231.085533860683

MGC62100 39.5676051939342 42.3550738181144 42.4580504587581  
50.8567345921473 39.9697332660833 46.0364000143537 48.0283573444179  
46.7980335276155 49.0986627051784 41.1222709786153 40.9157352260901  
46.917149434588

MGC70857 225.300736968225 233.501069644324 160.425627898607  
78.7450149191851 133.765486891316 124.965915196815 151.795609904857  
79.7170181855209 120.34542294172 191.482692108417 152.426698798326  
115.314880288079

MGC70863 58.5363098745941 47.4617077792004 53.5698357689852  
50.8567345921473 52.2089306840125 49.0361180089431 51.7714254834195  
47.5439485437351 48.9931786790166 44.9673049606589 47.9269108813022  
51.1740855632044

MGC70870 41.8409927585705 38.1312950900467 37.5597671487621  
41.8778873678551 45.8051846088552 37.2686490268265 35.4623691645629

41.6466169548846 43.4656637536244 40.3235655331796 35.6041926503637  
38.5279745308203  
MGC71805 42.9104454767916 39.7835513496873 34.6977013306396  
40.8681871019812 48.2748123114598 42.5660695551615 51.0013344286851  
47.8947595316832 49.1940901905636 41.3321861371202 45.1432412071268  
36.6603338274678  
MGC71993 635.906934423716 812.386878774445 915.519281747943  
1541.9572099378 601.611039798626 715.662312404643 939.453799186397  
576.367042159347 483.000434270291 598.404003732481 696.946621824188  
525.687522832693  
MGC72080 64.0759817636265 63.2804984998739 52.2132783757422  
78.7450149191851 58.8961770381033 48.8744644207821 74.416117986276  
54.8412943008635 59.4236178078244 41.1222709786153 45.390192977585  
53.5643281930979  
MGC72104 94.696942512529 121.936597605894 108.025082988807  
187.189412320761 122.0305509548 128.126336084436 162.486448421519  
98.9657264176664 109.654559065946 142.095236399173 167.999042735556  
153.673219460519  
MGC87042 269.184000351658 143.653706909456 157.592292551459  
334.813163079302 117.165519915808 265.790391813663 317.004252313348  
316.373650015333 160.283895105835 99.6265783263109 152.200107222761  
234.525867965735  
MGC87631 42.0532901689036 43.2649781354792 37.0642268327439  
38.2041059863839 40.9950639693255 37.3799542961839 39.3585350448719  
39.7509165247419 39.1790517315259 38.6454098044474 42.0750889188255  
36.7762265039864  
MGC88374 43.6706764143908 40.6380495994768 45.310660704531  
40.9607305725196 44.147557390293 39.9397419279057 44.3440839686558  
41.7419877611072 42.357910063876 41.9666541498638 39.5399188536544  
36.8690774823319  
MGEA5 532.043503787542 711.08269990525 749.49934348018 606.481020597082  
528.512401493184 691.94603958547 637.565156571985 629.532332373083  
563.927521628693 1247.50618540769 999.13039066242 897.198663109723  
MGLL 55.6781016051988 56.7754260322383 53.9612654850046 76.0975301977715  
66.6547247910487 106.125117937458 50.8388984085636 70.4482288143151  
52.5215406262267 148.198469375575 146.483908799607 83.3905516293346  
MGMT 194.644164648125 382.808520776835 367.235521372008 178.379117285008  
162.151812425949 233.692490031492 354.158105175308 424.182335137838  
178.4681248137 705.283979182062 488.277500837251 487.540800793233  
MGP 1621.89443989657 496.444080712528 483.313014703768 1440.41726370246  
231.685652845234 8441.71894028273 229.697141930047 2067.66516256598  
114.617965877564 4482.5285743878 3520.7579823657 3391.65926812276  
MGRN1 172.506486240017 171.043935516593 204.490115029568 188.336316985251  
129.613152757362 174.559216176175 220.79051545138 89.6313467455698  
153.626578526803 197.52820443061 198.754967214875 118.966448789057  
MGST1 187.888403806895 246.924485443224 269.963186760811 72.1955435994725  
342.146013966482 163.995560004001 317.560970617018 277.284338888467  
405.148979342648 241.486113826383 263.068504548549 560.413725186282  
MGST2 503.529187388654 1744.56688411113 1144.34555072807 365.401746744015  
831.578043520215 468.381233506231 774.305773140618 1103.90449800536  
1450.53108586858 1516.33074288338 1845.34855798442 1886.05449875658  
MGST3 1676.22158135012 990.431472174705 1171.207937488 1081.97502255142  
712.80113322987 1333.01876209753 853.947671456736 1339.29022988209  
745.219025960188 1097.92519921873 1077.94530110976 1294.42501356365



|         |                  |                  |                  |                  |
|---------|------------------|------------------|------------------|------------------|
| MIA     | 42.5193208629123 | 46.3635803515159 | 32.771863438151  | 31.5391275257362 |
|         | 32.325260431418  | 40.9506062495231 | 31.8431345631453 | 37.0390589468421 |
|         | 40.5912213523345 | 35.93950183586   | 36.7283081422707 | 40.6614700944853 |
| MIA2    | 45.334106390212  | 37.958111840848  | 37.7000400506818 | 39.066284740632  |
|         | 40.6723334103791 | 38.0648056183784 | 36.8974795581166 | 39.6474008369935 |
|         | 40.2739700860114 | 44.4294261786154 | 41.2267153672559 | 46.917149434588  |
| MIA3    | 49.965271003193  | 54.1773909134233 | 67.6983931011126 | 53.1249776278067 |
|         | 45.8051846088552 | 58.133863696399  | 50.6774883370457 | 50.9316571524777 |
|         | 55.8510296341925 | 43.2346122959037 | 47.7942039598052 | 50.7487159427973 |
| MIAT    | 57.50915811428   | 56.1355483199198 | 63.1450855271137 | 118.10944558223  |
|         | 36.6354013629791 | 37.2686490268265 | 41.3594868055879 | 52.5909491535773 |
|         | 40.0403898620771 | 43.4885245598939 | 48.8744644207821 | 40.9683275553869 |
| MIB1    | 46.441301934328  | 54.7855575216687 | 43.4709415392696 | 56.0794100106654 |
|         | 43.2484996523549 | 56.4819802857598 | 41.8315602975157 | 43.844855336215  |
|         | 63.8740412329753 | 59.2628513357357 | 59.6608518093582 | 64.2769859135548 |
| MIB2    | 111.347228208501 | 169.391313189738 | 183.887843429281 | 111.153589230866 |
|         | 149.173801572239 | 151.912182086236 | 165.029434090892 | 125.642081865992 |
|         | 121.53258696581  | 149.330073823683 | 170.390108862804 | 117.732966326465 |
| MICA    | 59.6008106247114 | 59.5534127075228 | 43.6670755115848 | 53.9517841438975 |
|         | 59.9326265577462 | 62.1857038870283 | 52.8496345990125 | 46.2779564481158 |
|         | 50.2223403889892 | 64.0162246399972 | 75.8056934060866 | 53.1182952086284 |
| MICAL1  | 134.285947677624 | 169.603165827302 | 175.193752938517 |                  |
|         | 345.36940514835  | 70.6903168772326 | 307.419724291399 | 144.593933058291 |
|         | 706.914069768466 | 60.3977304934451 | 206.312848708143 | 240.6614822416   |
|         | 135.718484174661 |                  |                  |                  |
| MICAL2  | 58.0139597055449 | 51.1740855632044 | 50.0050760710506 |                  |
|         | 55.4180794172794 | 49.5666074434383 | 50.5148383400703 | 42.8684958525042 |
|         | 47.5950227477807 | 46.3203995372658 | 38.8507804383261 | 40.6373400186325 |
|         | 48.4535991392809 |                  |                  |                  |
| MICAL3  | 42.5193208629123 | 42.5269793679335 | 41.437237454134  |                  |
|         | 44.0451487108213 | 43.2484996523549 | 39.2985791324641 | 43.8206425661746 |
|         | 41.7419877611072 | 47.5564423692142 | 37.3179578037963 | 43.7585538437696 |
|         | 43.7672102682067 |                  |                  |                  |
| MICALCL | 47.9175508887533 | 69.734208465775  | 83.3826639718546 |                  |
|         | 59.8102324370568 | 54.9249759425252 | 42.0574848021044 | 54.9765783642973 |
|         | 99.3448096967314 | 57.5883027758003 | 64.2174369755376 | 73.2234405348435 |
|         | 62.6868461044048 |                  |                  |                  |
| MICALL1 | 79.2665546280232 | 118.619819027443 | 110.112236384679 |                  |
|         | 70.2541961995753 | 95.2833228196616 | 76.7063975550116 | 97.0155195562193 |
|         | 79.6133633483649 | 107.087870999702 | 106.963092569134 | 105.71315237465  |
|         | 70.9377012403023 |                  |                  |                  |
| MICALL2 | 51.7607563002005 | 57.1863195337055 | 70.9377012403023 |                  |
|         | 61.7502624458447 | 68.7159356692728 | 51.5522731200852 | 45.6706505553383 |
|         | 57.7125861123012 | 62.9205616877344 | 67.0163226819964 | 61.8445915808329 |
|         | 52.2832912331043 |                  |                  |                  |
| MICB    | 127.694844372277 | 68.0388928513985 | 50.9933795450314 | 135.553887060537 |
|         | 96.8490167966217 | 52.5330333302271 | 165.751590932267 | 79.1039287828151 |
|         | 105.140085606412 | 51.2318935933116 | 61.6084234634424 | 51.3244198342335 |
| MID1    | 115.052948380817 | 111.395325732621 | 123.039116845742 | 53.3094843669564 |
|         | 102.655050997714 | 162.272853632419 | 146.355277438643 | 112.551747307723 |
|         | 160.152738034528 | 127.1365842097   | 127.232160404726 | 154.509548705054 |
| MID1IP1 | 105.686346729469 | 219.771890732457 | 294.048088688381 |                  |
|         | 189.289063944393 | 180.916465721523 | 243.672418126374 | 260.062749979574 |

|        |                  |                  |                  |                  |
|--------|------------------|------------------|------------------|------------------|
|        | 355.319959025243 | 429.854222129819 | 154.891160328731 | 164.735191308776 |
|        | 130.293915348934 |                  |                  |                  |
| MID2   | 70.8674195845729 | 54.1773909134233 | 60.0219418084008 | 51.223859150798  |
|        | 63.0842071602791 | 63.4610447573417 | 60.7992483126292 | 101.888001006345 |
|        | 68.0295963383707 | 69.734208465775  | 66.2366101899356 | 76.9303701148105 |
| MIDN   | 491.100053064936 | 532.581631305218 | 527.037018015766 | 396.355023788839 |
|        | 500.168833003599 | 567.675954219815 | 397.850286751468 | 697.57030127315  |
|        | 542.901822331329 | 289.410651581802 | 343.346644539158 | 377.573838771285 |
| MIER1  | 105.828093778276 | 71.193768715137  | 78.8357122967692 | 89.4504034432321 |
|        | 59.9876575158981 | 122.758873982957 | 102.962105111048 | 78.4815128101967 |
|        | 91.4121563150184 | 118.600699776727 | 108.660169650259 | 136.541379502691 |
| MIER2  | 72.2099571536717 | 76.3228890963999 | 63.5107036952143 | 51.3851157261451 |
|        | 82.8232026162231 | 48.5835484742456 | 73.3042538589134 | 71.2867274976738 |
|        | 68.2372031645261 | 81.6233038764401 | 92.5135737873857 | 50.8442982601142 |
| MIER3  | 51.1740855632044 | 46.6996902348633 | 49.4573631027613 | 39.1706564265495 |
|        | 52.0583273941813 | 52.2089306840125 | 42.1607322031054 | 42.5435283762933 |
|        | 55.3122077514658 | 43.7303813515864 | 44.9713479185144 | 44.1452943804044 |
| MIF    | 2588.47871581066 | 3465.3013599062  | 3202.8848520816  | 1769.18069954113 |
|        | 2854.82112538867 | 1704.0522304387  | 5971.45293864208 | 1658.86829668934 |
|        | 6606.35767508139 | 1421.44237064813 | 1497.73669971925 | 2036.72286752819 |
| MIF4GD | 55.7246872330059 | 60.808065997635  | 50.0748292497578 |                  |
|        | 79.4528447794527 | 60.9710783023013 | 68.4323624797175 | 70.7238101239421 |
|        | 62.5528124447176 | 62.9922928277769 | 50.5252048155459 | 59.501103909345  |
|        | 59.987045425047  |                  |                  |                  |
| MINA   | 47.6037279251423 | 51.0175677516029 | 50.8634043603791 | 46.2351155512713 |
|        | 52.2973903538281 | 47.5733603903505 | 48.6395795163502 | 44.5658219748173 |
|        | 50.7258407289028 | 47.9635720235482 | 44.7771939752086 | 45.4799270968969 |
| MINK1  | 42.6575535390785 | 46.2286164776607 | 41.2679739649179 | 40.591923288644  |
|        | 40.3452320167286 | 37.7000400506818 | 38.8417151851134 | 36.9976231206067 |
|        | 37.4540772310118 | 39.6719190054379 | 38.956280281655  | 38.5921548841176 |
| MINPPI | 46.3390850717989 | 46.8954576545929 | 58.7382738968248 |                  |
|        | 50.5310598656998 | 52.5645416722441 | 41.9543948167375 | 52.0942589368478 |
|        | 58.4200819624972 | 57.1016072897358 | 50.6486940895674 | 58.2315917325629 |
|        | 67.5047089908724 |                  |                  |                  |
| MIOX   | 38.6454098044474 | 38.3322849790657 | 38.4043916290561 | 40.3180310664156 |
|        | 43.7517118200398 | 38.9378717994178 | 39.5496902678788 | 36.0306975524309 |
|        | 37.2810767789306 | 37.3179578037963 | 45.310660704531  | 40.6614700944853 |
| MIP    | 40.148780650831  | 32.6416008433981 | 40.0998167098057 | 31.9427626516788 |
|        | 38.8456942580061 | 30.5999544621105 | 32.1218888714537 | 39.7509165247419 |
|        | 35.2143190355414 | 41.8613406887824 | 32.8881500803623 | 40.5703581862752 |
| MIPEP  | 80.3730667493235 | 122.904323796484 | 89.5597629049747 | 78.0020909283414 |
|        | 103.913834330352 | 86.6246917308185 | 94.1289383735162 | 94.1762630490912 |
|        | 86.4498396868205 | 81.6233038764401 | 87.4850071876743 | 70.4262478188233 |
| MIPOL1 | 40.8681871019812 | 48.9899488302637 | 46.8267540220952 |                  |
|        | 38.8495095797881 | 43.1252272136667 | 49.4157684139858 | 43.6753843488695 |
|        | 43.2551508830106 | 42.5406888281114 | 51.4454142248566 | 47.8284278211109 |
|        | 46.2625470410195 |                  |                  |                  |
| MIS12  | 151.175959542368 | 128.005663945917 | 119.545018066492 | 126.336900591139 |
|        | 116.540209248478 | 121.236881661832 | 132.689951767479 | 130.455608913636 |
|        | 94.7110944331075 | 127.685709088018 | 121.259683158193 | 169.344094528032 |
| MIST   | 46.3390850717989 | 43.1805016690297 | 44.696023817801  | 65.8926843080114 |
|        | 45.9104478407175 | 42.357910063876  | 39.7576136507593 | 43.3262148375525 |
|        | 42.357910063876  | 45.0155543555707 | 41.4508241771315 | 43.1805016690297 |

|         |                  |                  |                  |                  |
|---------|------------------|------------------|------------------|------------------|
| MITD1   | 194.644164648125 | 201.800572658224 | 191.298525555624 | 213.204385896543 |
|         | 210.133037772969 | 180.916465721523 | 153.177725521199 | 188.943404504867 |
|         | 193.15756263121  | 149.812291220906 | 142.812241748319 | 212.187855950414 |
| MITF    | 47.691150920844  | 42.0418171513817 | 48.8100349749783 | 45.9667142574745 |
|         | 44.9936360641969 | 59.4949177415847 | 43.8206425661746 | 43.6434576713809 |
|         | 49.2267897689452 | 40.0599807618105 | 48.8744644207821 | 51.3244198342335 |
| MIXL1   | 40.148780650831  | 42.9358255168086 | 39.8299340037009 | 39.7411455670172 |
|         | 36.2048942610546 | 43.0860383229288 | 40.3302268293707 | 32.4466419672036 |
|         | 37.5469247328848 | 38.8507804383261 | 36.8282383070068 | 36.5474283500601 |
| MIZF    | 80.2335594838879 | 65.9476039189301 | 61.356483470053  | 66.9218519793499 |
|         | 80.8728961146267 | 64.6374507338031 | 96.0539709962851 | 62.7950861902067 |
|         | 68.9038222450855 | 80.5388767883646 | 74.5886835786452 | 72.1090339831747 |
| MKI67   | 56.8168526942685 | 52.502055890816  | 50.9010149857308 | 47.6687908290818 |
|         | 51.6869155634183 | 41.2567470068038 | 69.779139490544  | 53.5271601314404 |
|         | 73.8800799416166 | 41.0057887014368 | 41.9908237694988 | 47.8931773060789 |
| MKI67IP | 177.912351477808 | 178.904972763325 | 164.547318765586 |                  |
|         | 148.529482776555 | 436.35723605534  | 232.879882989322 | 172.748740911831 |
|         | 166.431392410887 | 175.441884261362 | 135.007055711266 | 166.608353896248 |
|         | 244.529657015078 |                  |                  |                  |
| MKKS    | 83.4465817617201 | 95.8734933265537 | 92.2447473381285 | 102.655050997714 |
|         | 103.447730395424 | 125.642081865992 | 145.676955166566 | 76.2258667419953 |
|         | 85.4420599474339 | 108.57858133896  | 117.149897485203 | 131.859371655356 |
| MKL1    | 127.072685504735 | 108.881703882906 | 89.1115172961797 | 180.756651647731 |
|         | 93.3752733525183 | 107.309776354951 | 95.6697427870979 | 102.085154509866 |
|         | 122.405413080836 | 169.391313189738 | 155.795095438102 | 115.143810463938 |
| MKL2    | 57.1046180136491 | 54.2445399731644 | 73.2144205844199 | 58.0218262176065 |
|         | 53.1884505015411 | 66.295597720304  | 50.3519150282938 | 68.3372228877569 |
|         | 74.6955454743937 | 97.7620313090597 | 74.5654028199926 | 76.7791768896805 |
| MKLN1   | 344.578407722941 | 326.303950252592 | 366.420967163945 | 355.568857981155 |
|         | 301.525915314179 | 460.340300658834 | 219.34503297115  | 254.159017331462 |
|         | 457.202737754842 | 658.704350372292 | 560.413725186282 | 623.574706535278 |
| MKNK1   | 154.730266766226 | 135.043488274939 | 144.281881262975 | 197.813848976726 |
|         | 98.1598330893405 | 144.227861902786 | 106.035435807364 | 96.4072955983042 |
|         | 115.683762821211 | 128.070047614488 | 115.204421753719 | 112.021971795593 |
| MKNK2   | 239.385229462309 | 585.771656887036 | 680.279119780451 | 285.626835802986 |
|         | 761.341795853104 | 463.022816882856 | 334.726233105118 | 547.072513229674 |
|         | 997.492549573274 | 355.351648424266 | 365.517719684028 | 375.095491465679 |
| MKRN1   | 1323.73429724066 | 1337.53997230271 | 1007.03747721563 | 792.880882528835 |
|         | 999.862452730252 | 807.620534408416 | 1020.75813028358 | 1157.65264077595 |
|         | 1390.12380748446 | 1756.86714809925 | 1204.34388579291 | 1119.11683235081 |
| MKRN2   | 204.659954879641 | 329.72032366183  | 289.410651581802 | 231.472806936915 |
|         | 410.623529765253 | 356.628599887098 | 335.943994595615 | 279.001128345613 |
|         | 279.782392390288 | 223.749512763927 | 211.829374574045 | 235.420582508332 |
| MKRN3   | 48.0201377454632 | 49.5443425465542 | 44.7829632472754 | 40.4359177791566 |
|         | 50.8875036861067 | 48.7781962164988 | 60.3928833351886 | 41.9315419791594 |
|         | 49.1940901905636 | 43.9450023643394 | 38.956280281655  | 45.6692241948108 |
| MKS1    | 54.5358897781765 | 60.5571721986885 | 71.1521292570086 | 46.7577982595088 |
|         | 67.3568864741196 | 51.9421032049606 | 66.6894494536346 | 69.4677195088043 |
|         | 70.178974380507  | 73.9732553364283 | 71.5249259772583 | 54.1941919612524 |
| MKX     | 44.0328992213727 | 41.9894412416874 | 38.6727842796202 | 42.8235313007746 |
|         | 39.6535880152834 | 159.22638189198  | 41.1507980856436 | 45.5581356216957 |
|         | 47.7086093893038 | 111.248876636045 | 84.2960453806012 | 163.742560819575 |

|        |                  |                  |                  |                  |
|--------|------------------|------------------|------------------|------------------|
| MLANA  | 34.6977013306396 | 36.5219488315447 | 35.7105247506212 | 34.4382958501338 |
|        | 35.0181575202066 | 34.6977013306396 | 35.0305278582179 | 32.6039814489621 |
|        | 32.396635964353  | 38.6454098044474 | 34.064698871541  | 35.9604262434141 |
| MLC1   | 39.512606833112  | 39.9304283729853 | 39.0516158090705 | 43.2504382247503 |
|        | 41.1575777497576 | 37.6491835236783 | 37.9946685306274 | 37.7136011474903 |
|        | 39.5431003985578 | 37.4642807402741 | 39.1767390963391 | 41.9708115340487 |
| MLF1   | 42.7150227340364 | 47.765848710116  | 41.9666541498638 | 42.0102671859606 |
|        | 43.4544762830742 | 48.1591264215184 | 48.4859552186772 | 53.838484549134  |
|        | 43.6670755115848 | 38.8507804383261 | 42.357910063876  | 48.5123041297835 |
| MLF1IP | 42.5193208629123 | 52.5380506348717 | 47.9035532886869 |                  |
|        | 46.3203995372658 | 43.4544762830742 | 34.6977013306396 | 54.339958888486  |
|        | 51.6660481331154 | 61.0094935318105 | 43.844855336215  | 38.2795150354677 |
|        | 41.6550823405646 |                  |                  |                  |
| MLF2   | 499.744856832174 | 377.847116683974 | 445.364320342291 | 302.012602514613 |
|        | 368.913147706435 | 371.709014310561 | 436.497820504526 | 422.58866112053  |
|        | 520.415257194417 | 489.983164420779 | 377.221676837377 | 344.657779779036 |
| MLH1   | 59.046385957117  | 89.8234189405239 | 96.213791081731  | 82.2766822827861 |
|        | 191.454637685756 | 126.017900743748 | 104.341160312305 | 54.2877981508636 |
|        | 99.7668527666705 | 84.5913809068614 | 98.6706537801886 | 92.8644908993284 |
| MLH3   | 53.1309801459151 | 46.6314009405034 | 47.8263530599296 | 48.4916117779992 |
|        | 49.9493230064613 | 60.065511140146  | 48.1747307200218 | 45.3389970694851 |
|        | 49.7942306972014 | 55.1089864632456 | 50.6726688944968 | 51.6660481331154 |
| MLKL   | 66.3845271542459 | 94.7498756176388 | 123.817018264773 | 221.972553229362 |
|        | 78.9701459806641 | 88.6287852712744 | 78.8250642061439 | 83.0959169307948 |
|        | 64.1021292413458 | 60.8250302910721 | 57.115361349315  | 86.2488614616838 |
| MLL    | 75.9909523932333 | 93.9708162269401 | 72.2797007105795 | 58.7338159410728 |
|        | 69.1862663389904 | 117.408885431274 | 74.416117986276  | 68.4659783447092 |
|        | 103.139459009593 | 102.490465676619 | 93.6717518147993 | 96.0539709962851 |
| MLL2   | 34.1336988442837 | 35.5310164682026 | 42.7303139017786 | 35.6027791404152 |
|        | 42.1650127805175 | 34.0045980663271 | 38.8417151851134 | 35.6825474397235 |
|        | 41.1742244762318 | 32.5178504369282 | 39.9070785037411 | 44.4475838947656 |
| MLL3   | 57.2529265661628 | 65.854213724711  | 63.8740412329753 | 73.4788569136441 |
|        | 65.7587943905649 | 81.9218437790485 | 58.1466894651854 | 50.4397478643191 |
|        | 73.9986015964321 | 62.056770439781  | 64.1021292413458 | 65.1911280716126 |
| MLL4   | 132.838429478396 | 149.494335028498 | 109.029196594263 | 73.7124988616836 |
|        | 166.168385855406 | 100.423344358771 | 148.570371099987 | 148.130140385248 |
|        | 151.575914903116 | 103.607345835114 | 121.195506364658 | 83.6255924297514 |
| MLL5   | 69.8231400816467 | 61.0468099710416 | 69.2163524570019 | 73.2364546716324 |
|        | 55.6069214673486 | 61.9787117490846 | 62.7377155597666 | 63.9371474698484 |
|        | 80.5437011468815 | 81.2269477373795 | 89.2913927776683 | 76.9603875266956 |
| MLLT1  | 47.1962846565261 | 44.2630383225933 | 42.4580504587581 | 43.4410741327254 |
|        | 51.4527545197672 | 42.6575535390785 | 41.9393838138203 | 41.0381860307445 |
|        | 38.9006788676407 | 46.7646877499666 | 46.8954576545929 | 37.6557714476853 |
| MLLT10 | 73.967017874248  | 92.5903918620825 | 97.7127741001281 |                  |
|        | 87.3759678085472 | 97.2803806915572 | 116.287075019475 | 83.2925226467532 |
|        | 63.7491070301764 | 104.964345794911 | 116.184007615285 | 142.880684604126 |
|        | 142.714450804595 |                  |                  |                  |
| MLLT11 | 107.836867810972 | 132.946528291039 | 113.82565808481  |                  |
|        | 112.100074154279 | 219.186221756668 | 208.457587834567 | 198.497745548245 |
|        | 232.815747390118 | 104.220256076979 | 85.6763929745253 | 68.8058577447202 |
|        | 116.007007037602 |                  |                  |                  |
| MLLT3  | 44.0328992213727 | 38.4330755397458 | 40.8420925848403 | 41.0726336841311 |
|        | 40.9950639693255 | 38.7340969861754 | 41.1507980856436 | 44.293922970134  |
|        | 44.5303781239209 | 38.6454098044474 | 40.547835538778  | 34.806104801006  |

|        |                  |                  |                  |                  |
|--------|------------------|------------------|------------------|------------------|
| MLLT4  | 44.380620848621  | 43.8495248991589 | 43.8495248991589 | 46.1673159982664 |
|        | 43.4544762830742 | 46.7386599624801 | 45.8311458106942 | 46.4672637826582 |
|        | 49.1940901905636 | 50.6486940895674 | 44.8872784170036 | 43.6753843488695 |
| MLLT6  | 441.872082665398 | 241.706783147271 | 336.390195295291 | 264.548218296413 |
|        | 315.382114449988 | 249.148159759128 | 235.420582508332 | 413.918050849658 |
|        | 173.343091136741 | 356.133736281036 | 351.188432232165 | 314.281125546552 |
| MLN    | 37.5887129572848 | 41.0678614026819 | 39.991353369336  | 33.5578650644246 |
|        | 39.5595233162192 | 34.3887641786747 | 36.7892997857376 | 37.9273653326866 |
|        | 41.0476065156912 | 39.9948390976317 | 38.1253290586431 | 39.6833800000587 |
| MLNR   | 37.6397652536077 | 36.89524015739   | 36.2683886571585 | 44.6905691366696 |
|        | 37.956732373465  | 39.4953494583071 | 36.08956004634   | 39.1652965788406 |
|        | 36.4476883897928 | 36.3612409063792 | 39.3667161654772 | 38.8495095797881 |
| MLPH   | 1016.13142851085 | 362.123479430887 | 883.06773454117  | 179.47783529     |
|        | 53.0419743379342 | 183.77850568836  | 290.316757790733 | 546.80979198725  |
|        | 299.428590398636 | 612.014486689487 | 664.453262499828 | 532.35007819883  |
| MLSTD1 | 81.1350396749303 | 132.188774889597 | 56.4779645313958 |                  |
|        | 92.6230008876347 | 71.4183281327686 | 58.9676332048764 | 151.451107406752 |
|        | 103.856444152519 | 97.0348634204639 | 52.3304586399695 | 51.7538628098347 |
|        | 49.3984571719129 |                  |                  |                  |
| MLX    | 62.7053729334675 | 76.3583555666815 | 70.9377012403023 | 72.9752827496503 |
|        | 80.0312512203372 | 67.5255471827784 | 68.1833361806128 | 47.1403336158803 |
|        | 71.0211264570699 | 60.1912192309911 | 53.3078448066074 | 64.1607001437806 |
| MLXIP  | 46.8141313516997 | 41.0678614026819 | 40.301483914446  | 42.4580504587581 |
|        | 38.745552403895  | 46.0364000143537 | 42.8684958525042 | 40.4359177791566 |
|        | 49.8304479381623 | 42.9866214102525 | 51.7538628098347 | 42.8864415494484 |
| MLXIPL | 45.7017023767682 | 39.6995529770239 | 39.5118967430322 |                  |
|        | 41.5464765641928 | 45.402658694824  | 44.2607789091176 | 41.1886975241176 |
|        | 57.5640428227111 | 72.5993974280876 | 44.3303034026662 | 46.3635803515159 |
|        | 44.2527566343661 |                  |                  |                  |
| MLYCD  | 62.4317959077388 | 72.93977835851   | 70.8606919488782 | 53.8086134112366 |
|        | 87.2282539094452 | 64.0985088513857 | 68.4380822448123 | 43.5544347011646 |
|        | 70.178974380507  | 64.8549209064366 | 88.4594321382477 | 59.2035499250243 |
| MMAA   | 45.9090659324223 | 46.0023068797812 | 42.640829914102  | 41.5464765641928 |
|        | 39.7568367479301 | 39.3841861812262 | 37.2892641289258 | 41.4508241771315 |
|        | 43.1805016690297 | 38.0078357808393 | 42.2618615571566 | 49.9692385479389 |
| MMAB   | 53.3059058105836 | 52.0268699306396 | 53.0290605707162 | 63.3006977162657 |
|        | 47.8075998240396 | 48.4758590019384 | 48.260931742163  | 48.7039705048129 |
|        | 63.8357465390633 | 59.8130420783374 | 56.0477607422828 | 52.3896785600751 |
| MMACHC | 77.0301627655229 | 69.2082505043031 | 86.9924799927707 |                  |
|        | 66.9218519793499 | 237.864776225441 | 75.7502062965698 | 85.0342118119783 |
|        | 98.9657264176664 | 142.945182805248 | 60.8730416435467 | 84.9601800557888 |
|        | 70.6903168772326 |                  |                  |                  |
| MMD    | 353.338686666875 | 93.2630594602634 | 63.7744603935682 | 181.200738629391 |
|        | 117.165519915808 | 234.495626550751 | 125.752132815786 | 276.550265506988 |
|        | 53.9287524861617 | 73.8313212063649 | 104.873452487222 | 174.985336606027 |
| MMD2   | 38.5648843914189 | 38.9338521051669 | 43.6670755115848 | 38.4208429103799 |
|        | 37.8679241954337 | 34.2773859804062 | 39.4600924554505 | 41.0381860307445 |
|        | 36.0741672064298 | 35.8304004211528 | 36.0481934423077 | 39.8497227447888 |
| MME    | 61.7053174323665 | 40.6663433492193 | 39.5934446973527 | 78.3962885374388 |
|        | 52.8928296360463 | 43.7232076118476 | 71.7408778060956 | 44.4455094736026 |
|        | 63.0505463098231 | 44.081163104701  | 54.4140381300469 | 42.1537476443423 |
| MMEL1  | 60.8357760968871 | 59.1938299291358 | 57.974826209076  | 40.4967168818294 |
|        | 89.3168921945222 | 43.2312848495114 | 60.581035231763  | 81.2228688683149 |
|        | 159.618353114269 | 55.9283039581662 | 54.1618170692792 | 56.4873776344986 |

|        |                  |                  |                  |                  |
|--------|------------------|------------------|------------------|------------------|
| MMP1   | 51.1055541075029 | 78.258486366912  | 63.9148277361329 | 516.704027135707 |
|        | 43.1252272136667 | 39.9397419279057 | 44.9863726205428 | 65.5820437889838 |
|        | 53.7442594289333 | 40.8970401536578 | 45.7328341667151 | 36.449101775775  |
| MMP10  | 46.8141313516997 | 264.263104842911 | 89.9650488563894 | 384.280434953152 |
|        | 73.3533274030352 | 47.2927436772465 | 44.2166118829877 | 115.221134337342 |
|        | 70.2541961995753 | 38.528621456378  | 41.8168470823451 | 40.3691324547049 |
| MMP11  | 6258.22561934986 | 166.535245140901 | 169.723009455614 | 100.774098314706 |
|        | 106.804269453898 | 58.7404123614695 | 134.024691118762 | 181.093943398293 |
|        | 92.261357059727  | 51.4454142248566 | 66.1229691315616 | 48.1627097465883 |
| MMP12  | 320.966569449558 | 205.24499293304  | 106.590506599473 | 1301.07436212673 |
|        | 100.271925566074 | 80.257554904218  | 197.325473090277 | 56.6910078150745 |
|        | 148.422344459694 | 40.7620472083159 | 50.8826620053386 | 92.0002934041687 |
| MMP13  | 52.7570461169969 | 43.7644428186265 | 39.9101908547397 | 44.550322123994  |
|        | 46.3150221024046 | 34.1806289878747 | 45.8980298854198 | 48.4670130605028 |
|        | 71.0820747228972 | 37.6383530120621 | 41.5421429082231 | 36.8690774823319 |
| MMP14  | 119.714551585774 | 68.1040271620925 | 58.5212649095879 | 109.726577835621 |
|        | 50.7615314686244 | 45.4882438975269 | 49.1067959632109 | 62.6984594468418 |
|        | 55.8510296341925 | 71.1607965028029 | 67.5417980425932 | 56.361708620372  |
| MMP15  | 117.439175394651 | 68.6804583979297 | 67.9850517608624 | 43.6726153508978 |
|        | 53.4109882045447 | 48.3686935595826 | 100.650129064849 | 83.1702007661831 |
|        | 88.8772406115484 | 73.0394191668858 | 61.3529667465225 | 61.2108152457954 |
| MMP16  | 38.7169375795196 | 36.4505152165662 | 38.7745734037492 | 38.7864161493321 |
|        | 40.3124262005404 | 39.4953494583071 | 39.5032015229125 | 35.8359251163299 |
|        | 39.3750969348308 | 37.2089297656361 | 37.6934694587739 | 40.1700117452801 |
| MMP17  | 39.4710743516517 | 43.2649781354792 | 39.3344387353654 | 43.1131704517186 |
|        | 39.2608760193011 | 44.5973052166071 | 42.1607322031054 | 42.0778399888414 |
|        | 42.1191165911658 | 45.4953384153622 | 41.4784106456949 | 40.4310982248029 |
| MMP19  | 45.8574226904273 | 46.2286164776607 | 51.0175677516029 | 68.5174271063894 |
|        | 49.2267897689452 | 48.6621527194963 | 43.0269218496197 | 44.4031868028216 |
|        | 41.4636047919453 | 43.6670755115848 | 43.3085358214154 | 45.5800840647989 |
| MMP2   | 135.323750661937 | 55.5294887653184 | 61.1076362129586 | 82.7394574977114 |
|        | 71.7263663921367 | 100.017263238916 | 46.8613212048981 | 64.3284163241986 |
|        | 49.9162522057712 | 71.3900857589616 | 63.9029785089421 | 76.0240426902567 |
| MMP20  | 39.6609238036815 | 39.0894172982439 | 38.3166554965434 | 40.1804147506786 |
|        | 37.3785704939904 | 46.1974343793412 | 38.1793598983615 | 37.7612949798895 |
|        | 44.0202052410607 | 39.1621898366355 | 43.4709415392696 | 40.0557788909923 |
| MMP21  | 43.3098985178373 | 39.2907645923217 | 39.5954353681031 | 39.6705473876526 |
|        | 42.4864576619427 | 41.0909708790194 | 44.5390641547628 | 38.079222289614  |
|        | 40.9901805728485 | 43.7303813515864 | 41.6657053704762 | 40.9149601380325 |
| MMP23A | 65.8028755495823 | 52.9875116869966 | 42.9544982810566 |                  |
|        | 51.4573915545728 | 55.6991707857987 | 80.5478617156852 | 42.357910063876  |
|        | 42.9963672633493 | 43.5000769365019 | 67.7626103902954 | 56.233217375698  |
|        | 53.0216110762751 |                  |                  |                  |
| MMP23B | 148.016994658777 | 80.7198077526005 | 62.6885730386156 |                  |
|        | 148.529482776555 | 103.869437847206 | 189.650905999631 | 59.7444979429174 |
|        | 94.8884063433735 | 53.5473283956867 | 152.792457231813 | 126.079949368634 |
|        | 84.6435656850129 |                  |                  |                  |
| MMP24  | 41.3387790895716 | 51.2405397507224 | 39.7411455670172 | 40.7481155008596 |
|        | 41.467005949568  | 39.3841861812262 | 42.9803717121865 | 40.047314525032  |
|        | 42.992884918158  | 44.8997235283254 | 41.0050831223107 | 40.2669497398702 |
| MMP25  | 44.1737502492846 | 64.447308523693  | 49.6978906361694 | 224.665128374218 |
|        | 50.1185085888209 | 68.0501900087917 | 80.0733119200914 | 49.8344973836834 |
|        | 43.6039443285137 | 46.1390887492649 | 45.1778228816327 | 43.5738557773903 |

|        |                  |                  |                  |                  |
|--------|------------------|------------------|------------------|------------------|
| MMP26  | 42.3433931248155 | 43.683792219729  | 45.6989664108554 | 44.265834798964  |
|        | 38.3561682218911 | 39.132725377815  | 43.9450023643394 | 39.2672712041774 |
|        | 44.5303781239209 | 42.3606390470387 | 46.6442692119997 | 40.7704587752083 |
| MMP27  | 36.9060997041453 | 38.6414316877471 | 43.0016969050339 | 45.8844325913247 |
|        | 40.3452320167286 | 48.0350549043063 | 40.9157352260901 | 41.1575777497576 |
|        | 45.5779686360641 | 40.2112371512838 | 38.6662194645633 | 47.6938628797168 |
| MMP28  | 46.5549623118323 | 120.34542294172  | 445.875994521817 | 45.2806199505029 |
|        | 132.036058401203 | 93.9805435116156 | 51.9819543312733 | 62.5528124447176 |
|        | 359.465715235071 | 146.594288395595 | 220.167309646966 | 243.672418126374 |
| MMP3   | 76.6868184563568 | 46.3635803515159 | 47.0940613507321 | 275.846698617064 |
|        | 59.3611824459962 | 73.3506594385504 | 70.7238101239421 | 227.474113475825 |
|        | 66.7008819035152 | 50.6486940895674 | 44.2925355984056 | 217.322595454018 |
| MMP7   | 635.050535522135 | 65.5730163728961 | 60.3155766445629 | 361.57814355509  |
|        | 76.1595226738812 | 48.1997158668729 | 975.544591158047 | 171.33368481035  |
|        | 129.675613712326 | 43.4544762830742 | 50.4009921377716 | 81.066448172567  |
| MMP8   | 41.7397731376692 | 38.1312950900467 | 40.301483914446  | 43.3078542962968 |
|        | 34.7018263647985 | 40.650742261428  | 38.0598374201407 | 37.6557714476853 |
|        | 39.5806465938526 | 37.3179578037963 | 38.5668610487033 | 41.4508241771315 |
| MMP9   | 759.94822128584  | 547.442608452594 | 339.262360833465 | 4048.33132153903 |
|        | 78.4590546118913 | 167.702870734995 | 406.104588997462 | 122.621100838222 |
|        | 54.998510746958  | 39.3698811593364 | 39.2542963855807 | 46.8129509799753 |
| MMPL1  | 46.8141313516997 | 42.6939394537076 | 44.3344900481112 | 44.0451487108213 |
|        | 49.7235523248653 | 41.554942319225  | 43.0930293831497 | 41.6466169548846 |
|        | 45.2897806651929 | 45.1569741609597 | 45.8180710486329 | 42.0424641526302 |
| MMRN1  | 43.3638918705225 | 49.0697565324841 | 53.8724557170772 | 71.7167037224069 |
|        | 41.0885562160946 | 271.104193102849 | 50.0088611244948 | 40.2382908228517 |
|        | 97.8764110456132 | 89.9284109077375 | 110.440072569721 | 83.0460206754856 |
| MMRN2  | 42.6036491382658 | 47.4740726032707 | 39.0775870687758 | 47.481302504066  |
|        | 42.7107928951766 | 35.6125439901743 | 38.0598374201407 | 37.6557714476853 |
|        | 34.226171989766  | 43.0919221375514 | 43.0971787292711 | 50.1579724208315 |
| MMS19L | 324.223368470876 | 399.027079798213 | 606.276674926567 |                  |
|        | 349.83809766755  | 501.817654561915 | 360.248832535446 | 383.853296408061 |
|        | 304.977139992391 | 378.358853591082 | 352.917938567734 | 404.051373731802 |
|        | 322.169157552725 |                  |                  |                  |
| MN1    | 86.9816932158186 | 51.2776048338    | 57.165971310746  | 65.2001674269291 |
|        | 48.87875862356   | 88.715256326632  | 45.3597029614942 | 47.6952179922944 |
|        | 43.9204029310411 | 82.1062834830477 | 78.253478446856  | 64.531467526747  |
| MNAT1  | 45.8108990837624 | 47.6914221838216 | 53.6837370963602 | 39.2780515621926 |
|        | 49.5666074434383 | 50.9724155054821 | 43.4544762830742 | 50.1833483241864 |
|        | 58.3564461855595 | 52.5522545249206 | 55.9604109457703 | 59.3709786862962 |
| MND1   | 52.4179224871914 | 54.437526296816  | 50.0526763693329 | 49.7350276169552 |
|        | 65.3585701203568 | 43.8308097066396 | 61.0468099710416 | 64.6945454069792 |
|        | 76.9953921834156 | 43.0919221375514 | 39.7342718293432 | 41.6031169661721 |
| MNDA   | 60.4593810615882 | 70.8546350449171 | 63.1450855271137 | 563.065549077627 |
|        | 51.6869155634183 | 146.133951379664 | 149.312893905408 | 58.5406981871153 |
|        | 44.4395580493118 | 43.4885245598939 | 44.1148826235374 | 45.8546719310325 |
| MNS1   | 56.5451429304872 | 56.5319193881205 | 41.9666541498638 | 40.8084239472012 |
|        | 85.1661952927159 | 77.4812665677338 | 173.212430860273 | 247.416016413788 |
|        | 74.7934385405346 | 60.1912192309911 | 50.3876754565799 | 44.7871262003648 |
| MNT    | 149.076166432567 | 357.111253129662 | 210.032782918825 | 181.029293055674 |
|        | 192.171116215791 | 150.114520857436 | 166.910579215196 | 204.862161704394 |
|        | 150.789911774534 | 179.09303345382  | 153.673219460519 | 193.15756263121  |

MOAP1 85.0753342967819 102.655050997714 85.271985416622 104.8505815954  
70.7760293129408 244.678323059428 69.1414574152997 82.4414994502172  
73.5541045639348 142.095236399173 125.07621933584 163.917208464731  
MOBK1B 41.3387790895716 35.6434124419782 48.7039705048129  
41.3027031037343 41.2740822675592 38.5252456306656 44.3440839686558  
43.6434576713809 37.5469247328848 36.5806287103157 41.2598458726002  
38.2350720635382  
MOBK1A 33.7777950030073 37.10170285405 34.0382693188794  
39.7411455670172 40.5710637884029 43.2805590023412 43.0930293831497  
42.157627240486 41.9635525160083 37.5343260962758 43.6629145624937  
33.939263369489  
MOBK2A 79.0304119352941 68.9833517108866 77.6971278685226  
171.920449949522 82.0149542477384 87.539553421006 63.3924515518667  
68.4659783447092 87.5074297754031 87.0972426452686 78.1351673826829  
74.9294208313176  
MOBK2B 50.0466349801009 48.3077814647455 46.0727230219512  
95.9391851122771 48.6224651100733 58.0095518210499 40.4359177791566  
45.3872406432794 54.4912806027381 59.9354531144375 60.1466326805616  
62.2025996860055  
MOBK2C 96.0539709962851 102.526214617084 127.21946569933  
113.612874206329 89.7184505543918 138.783011990219 94.0140258999054  
88.6663961027926 146.634440537624 163.261867589623 148.32293918881  
167.774103692331  
MOBP 40.4310982248029 39.5050383901884 38.4043916290561 37.5672792721124  
38.0057289062111 40.4792096791853 44.9326464250932 40.4639532172338  
38.077319327498 36.5352572191451 38.7317659471222 39.2839132447749  
MOCOS 92.2649985233782 215.557210899786 224.480311257437 110.25582862843  
98.1220820761255 45.7300501624017 206.989423961124 134.307645598718  
176.816741656659 67.4760456862775 91.6826894933058 135.012695962236  
MOCS1 88.1733775711738 87.0045333192221 118.619819027443 57.0629653735694  
88.655273320123 79.6133633483649 99.8699868526053 86.4154945670734  
83.5228323483109 106.799510275842 88.6460475038549 85.4790745407113  
MOCS2 50.7712194930085 51.9601694822199 58.0800636554122 49.5424425850549  
50.5868854091439 74.5065528806984 44.9027423017108 45.5581356216957  
53.257841481233 51.294537308199 47.4870742154624 65.7853960266587  
MOCS3 55.7246872330059 50.164201758929 48.6037684272115 46.614092935749  
56.8307116636372 40.650742261428 47.8947595316832 49.085741080241  
43.8482802038826 46.441301934328 42.170702295259 43.6753843488695  
MOG 38.5648843914189 38.4330755397458 36.769073068743 34.9221408381038  
37.0526522140242 36.6271061451613 43.5627649099623 36.1375121409002  
35.6970528713709 37.6383530120621 37.0180934800573 38.8495095797881  
MOGAT1 50.0466349801009 44.7829632472754 48.1331309338997  
68.1992221684165 46.3150221024046 42.8598805316863 49.8281348927244  
42.6450179841129 48.3119523820103 47.4767851750188 45.1432412071268  
42.6758568421347  
MOGAT2 41.8409927585705 34.5023764006976 43.3085358214154  
41.4273122914951 42.9090346219023 40.3357777530419 41.3594868055879  
45.7476095696859 43.5669306063196 41.9666541498638 44.1148826235374  
38.4330755397458  
MOGAT3 35.1307934330047 35.9305494063137 36.4564050256915  
39.853175885492 35.7973685350741 38.6414316877471 41.253645578517  
37.6557714476853 38.3418933808844 40.7063426028871 37.9230440150891  
37.0953622406687



|         |                  |                  |                  |                  |
|---------|------------------|------------------|------------------|------------------|
| MON1A   | 54.5358897781765 | 65.6721629145797 | 60.1874689914535 | 59.987045425047  |
|         | 72.6675345946258 | 55.3202238943712 | 43.6753843488695 | 43.7396619462033 |
|         | 54.5952754712007 | 50.3388505346542 | 53.4088637045445 | 45.8546719310325 |
| MON1B   | 107.034189847828 | 150.262748333939 | 175.798140574991 | 152.545682001987 |
|         | 93.5717680539357 | 86.7776945455037 | 128.391264770998 | 67.5206810636627 |
|         | 94.3537052300317 | 97.8915084053153 | 108.12482131423  | 89.4747568145717 |
| MON2    | 175.028390974125 | 151.472676874224 | 142.840631375936 | 181.200738629391 |
|         | 130.758455807465 | 137.424708183613 | 106.599578931817 | 92.3532155362085 |
|         | 151.175959542368 | 130.62791061956  | 139.796374175417 | 143.6667863386   |
| MORC1   | 38.5007204246293 | 43.1805016690297 | 41.6079958749402 | 38.5252456306656 |
|         | 42.7982502551634 | 38.5252456306656 | 40.7910160811527 | 40.047314525032  |
|         | 41.5635499110307 | 40.5090849993014 | 39.3667161654772 | 40.5703581862752 |
| MORC2   | 267.70610731202  | 137.424708183613 | 148.906660152784 | 80.7168944828052 |
|         | 242.751164798133 | 115.441414762268 | 188.408367998553 | 189.950108471943 |
|         | 157.568088397305 | 147.444007777385 | 142.945182805248 | 124.998771394658 |
| MORC3   | 60.562215295948  | 68.7826057564876 | 79.8773095098789 | 65.524821699432  |
|         | 87.2282539094452 | 87.4239220649478 | 72.5956443098684 | 50.7364620410977 |
|         | 87.6018870099686 | 50.8826620053386 | 69.3645322033576 | 78.9701459806641 |
| MORC4   | 55.3153799233744 | 48.6447083765118 | 44.1452943804044 | 38.5252456306656 |
|         | 42.1650127805175 | 44.6524308640784 | 51.0013344286851 | 57.5640428227111 |
|         | 45.3756389170606 | 44.1379638573455 | 49.9338905397767 | 48.7814131120945 |
| MORF4   | 39.9697332660833 | 34.0382693188794 | 40.6737160001291 | 39.7411455670172 |
|         | 35.0181575202066 | 40.040778349137  | 46.1634822993009 | 40.1474543172332 |
|         | 47.3791873993182 | 39.2623423164488 | 41.4508241771315 | 44.0451487108213 |
| MORF4L1 | 232.113067048781 | 235.169335305672 | 131.973056760893 |                  |
|         | 222.453547273598 | 217.065944053174 | 445.875994521817 | 197.813848976726 |
|         | 223.531821464447 | 261.470129378265 | 263.330471155421 | 224.231862271463 |
|         | 404.524605612471 |                  |                  |                  |
| MORF4L2 | 720.552354470517 | 985.328482076985 | 888.56944380788  |                  |
|         | 629.301646370726 | 570.085422388476 | 1154.6386362     | 692.630044242985 |
|         | 419.741944629785 | 1017.1803754111  | 328.341232263338 | 456.757277476069 |
|         | 1004.8679675716  |                  |                  |                  |
| MORG1   | 59.3923286524971 | 58.8281931439093 | 70.6592421895338 | 78.7450149191851 |
|         | 81.552417816742  | 80.7067505750848 | 75.7342400123505 | 80.7067505750848 |
|         | 67.0290776715331 | 99.9951025176909 | 101.28981910937  | 78.0586153423713 |
| MORN1   | 34.2180669723984 | 38.5252456306656 | 42.4580504587581 | 35.6027791404152 |
|         | 40.4639532172338 | 37.9951997351435 | 39.6535880152834 | 49.3880946790306 |
|         | 40.4997186069494 | 36.1550293353654 | 42.8263096141654 | 44.3521099857368 |
| MORN2   | 111.954989477689 | 77.5737637002275 | 110.941686767697 | 89.6115806694241 |
|         | 96.8490167966217 | 88.1068080491008 | 154.811704749343 | 158.386539883294 |
|         | 129.252597914828 | 71.7464249053513 | 78.0020909283414 | 114.269266728885 |
| MORN3   | 45.1912496459517 | 42.8542642792862 | 40.1985790927248 | 41.4273122914951 |
|         | 40.7779767565889 | 37.9951997351435 | 47.1345949868029 | 43.7396619462033 |
|         | 41.2870505273664 | 45.0155543555707 | 39.8184668132023 | 39.9519547348106 |
| MORN4   | 45.0985088502363 | 48.8584917918986 | 57.0427273538849 | 41.0726336841311 |
|         | 41.467005949568  | 45.7300501624017 | 44.6032218589199 | 50.5070012045444 |
|         | 52.4539007817929 | 68.1674425673171 | 53.8856501960117 | 60.3816817102326 |
| MORN5   | 42.442231667357  | 35.4484652445078 | 39.8299340037009 | 43.6726153508978 |
|         | 36.7356360093603 | 47.5733603903505 | 39.6535880152834 | 37.86982638952   |
|         | 41.3803269429468 | 45.1569741609597 | 45.4799270968969 | 44.5432192783161 |
| MOS     | 42.6036491382658 | 43.0971787292711 | 35.7105247506212 | 39.2780515621926 |
|         | 36.2048942610546 | 35.0970060242246 | 34.6720534245631 | 32.0636251428594 |
|         | 37.0126425326534 | 30.0771630269067 | 31.6063174764616 | 35.4484652445078 |

MOSC1 77.0301627655229 167.678403380953 84.4443931765378 73.1447139654971  
252.347641176529 109.221269056557 235.962209790392 182.80711310964  
141.567299023381 161.326580647514 171.829798001437 86.3888090084564  
MOSC2 48.1125722136997 49.2934904960601 67.6373573669424 48.309866878365  
81.4621222177298 85.3718124658316 59.0457625163577 66.295597720304  
66.0350709576651 67.2437599548936 59.8070012006708 61.6311118308635  
MOSPD1 49.7188990489616 45.6533175604486 47.2055133646385  
51.0175677516029 44.3557408297309 46.574682061365 50.3519150282938  
53.4109882045447 45.8325181856483 52.7972156492746 53.3078448066074  
55.0767527801658  
MOSPD2 57.6285775590145 60.1685144469519 66.737740728688  
107.637618676176 68.0414563597154 74.3729155936862 97.299696284253  
65.0928075335306 53.6837370963602 78.59966540743 69.8099797531111  
68.7753456118815  
MOSPD3 121.281573820819 82.6116645182046 129.550925624841  
82.7394574977114 101.549779766678 86.1633564934019 102.457537266105  
91.9919654450652 118.488996952258 122.576931376426 97.2615918872914  
76.4580830432622  
MOV10 169.168332370229 131.413578749264 187.628738023353 115.048869605875  
139.472956453414 100.017263238916 200.41782363596 183.887843429281  
171.770578381558 230.486681581762 181.793140865972 132.036058401203  
MOV10L1 49.540449125788 44.5152708955623 38.9790184198145  
40.3180310664156 52.6922486991742 43.4681646416585 39.4600924554505  
42.2577689927563 45.4799270968969 44.3648993568405 47.4630625313159  
43.8575940017119  
MOXD1 250.086163187797 91.6777754418002 43.9450023643394 171.722423740869  
53.6907197364586 75.9713712509177 42.6913548400127 103.199200862158  
39.9777866059804 79.9810256029665 135.138667957956 71.6502000742477  
MPDU1 146.931674964658 129.820909990346 152.843785599892 141.206849814363  
115.894467332637 88.1733775711738 175.165302282522 92.1151486847283  
130.792245267896 116.530589514041 140.51841571801 91.0847547974748  
MPDZ 83.374777060444 65.485076402841 80.943990104641 80.4007868743886  
74.2283328056604 222.40005420611 84.607833108004 72.3822545261582  
57.9713749600418 79.8511759086625 110.061090703983 144.562563943103  
MPEG1 53.3967242431461 55.0897019602305 52.2132783757422 62.1776700757427  
55.6069214673486 63.3612993417558 43.6753843488695 49.7309743973184  
48.1174861108648 51.0055825931636 46.0905079010237 46.7182294568603  
MPFL 47.3791873993182 44.2105195734073 41.3366779545815 40.646702696033  
43.9450023643394 45.4882438975269 43.0930293831497 47.3791873993182  
55.1253465069845 51.3351387089044 42.357910063876 50.0571060701893  
MPG 43.6434576713809 46.6314009405034 45.6506747447733 48.4916117779992  
45.0782075423781 45.338588656043 44.5432192783161 44.4462010656637  
43.802800826921 44.858845220285 47.3523372571873 46.1592873342534  
MPHOSPH10 223.040734249612 147.557451530784 131.258204302177  
113.388372364837 168.926743047741 171.974852167092 139.905295316081  
172.801059111314 122.576931376426 106.897106266912 104.626873082138  
131.942576661072  
MPHOSPH6 45.7356815244513 52.4351670989268 69.7855392178808  
73.1447139654971 61.5236837309467 56.2736599756843 55.0897019602305  
48.3590401011623 60.3977304934451 41.6373771565199 45.5707650534259  
56.1875519519366  
MPHOSPH8 199.54796711653 241.31366702947 226.456072107079  
240.11295387591 186.395673402867 353.076989769287 209.467874193952

246.500690127803 147.405190988088 266.07996221256 357.347859577591  
 248.924819383887  
 MPHOSPH9 66.3095900379311 63.1780854659428 56.7776874358774  
 63.9570596163747 64.193536444915 55.7197525213035 61.8571521441451  
 54.3820590274321 71.0820747228972 45.3530683538086 50.4740079109854  
 64.4156641487994  
 MPI 75.3761360028971 55.9269493191353 51.7138050344355 55.0604256312495  
 78.9088042058577 60.9822577063534 79.3861418060845 68.8058577447202  
 81.1416376689959 76.1382217104599 61.5392012551041 66.1650385535549  
 MPL 38.957687788868 41.6466169548846 40.6737160001291 38.9534635879195  
 45.1137938810047 48.7781962164988 45.8980298854198 40.5158867964016  
 44.2607789091176 56.057906531592 48.2050207071554 42.57175366709  
 MPN2 39.9697332660833 42.3550738181144 40.6737160001291 39.1706564265495  
 40.3452320167286 40.3357777530419 38.1793598983615 40.4359177791566  
 36.8127605061228 37.8217989841918 33.0553208959996 36.449101775775  
 MPND 58.7404123614695 65.8082111065882 84.5998418020787 89.6115806694241  
 76.3790849853724 69.1523164481201 80.5457814044192 90.9010016862442  
 74.4365426051588 76.7137782332689 62.358854072801 54.7953298048942  
 MPO 41.7397731376692 46.0713306971594 42.3536549114165 57.0629653735694  
 55.3100442506299 42.8598805316863 40.7910160811527 45.9604707098953  
 45.0997987980157 44.571915452417 38.8507804383261 43.3744503319109  
 MPP1 91.31756001203 53.8499082625091 55.9459886217809 311.502922515027  
 49.7235523248653 136.517445122438 51.9421032049606 72.4834467838798  
 41.863927676552 63.9129423266349 57.0690683036183 80.3500323413132  
 MPP2 46.7293238583888 37.7384958256497 44.696023817801 50.5310598656998  
 53.5594683028749 77.554620469891 43.9450023643394 59.4674205670657  
 45.8325181856483 40.8049408996274 53.3078448066074 48.4535991392809  
 MPP3 61.1022920882065 43.0971787292711 49.3000844711116 40.9607305725196  
 46.1804647841331 41.0582900711341 40.1235656101329 41.3506832276112  
 43.8482802038826 43.7303813515864 40.9157352260901 45.7562276914441  
 MPP4 42.6036491382658 37.6383530120621 34.8956628705329 34.5425384901279  
 34.806104801006 36.9060997041453 37.830876898596 36.6452480995946  
 33.6288663955758 35.3849221682845 39.5399188536544 39.6352613956998  
 MPP5 95.2614267797703 73.7873098190297 117.869393694564 63.7909104347097  
 93.2630594602634 103.343354834837 118.27400376579 77.8946473414547  
 180.717886605217 144.116701129933 137.955007835039 174.443102016472  
 MPP6 47.5647821785529 48.8584917918986 44.3344900481112 57.6511495792664  
 81.4621222177298 77.7481370715949 82.2650787041549 70.8749669449099  
 47.0804681460898 48.0211752672327 47.8284278211109 50.3118072462443  
 MPP7 46.7293238583888 46.3635803515159 58.2986825661503 37.4223289687135  
 49.5666074434383 53.2046867327331 42.8684958525042 48.0582855095143  
 45.6582729799009 46.0119912782855 53.4088637045445 48.6795178347248  
 MPPE1 147.137598111239 132.036058401203 208.023488988931 216.606583011866  
 148.312100828662 134.307645598718 116.080897948094 98.0023132593711  
 173.288267403695 183.469819903584 128.635811501506 161.890859629246  
 MPPED1 37.8891397738265 42.8978721487095 40.2382908228517  
 40.2427205947092 36.4823839988066 40.040778349137 40.4995052849302  
 39.9927637255545 41.2437378488025 39.9948390976317 39.3118883678101  
 41.5191828467556  
 MPPED2 35.1307934330047 43.9421822132391 39.1799070031819  
 35.9521941716188 41.7929491793697 43.7630587657205 37.2892641289258  
 43.3262148375525 49.7336769474446 73.9732553364283 73.155721596638  
 63.1443731864055

|        |                  |                  |                  |                  |
|--------|------------------|------------------|------------------|------------------|
| MPRIP  | 277.069127740648 | 259.812381486915 | 283.747865829282 | 205.772128732705 |
|        | 254.756894822368 | 395.634889855838 | 143.6667863386   | 209.61080762285  |
|        | 112.830467116678 | 369.877521477669 | 300.703401968169 | 235.574006931404 |
| MPST   | 111.589338349635 | 100.927111474879 | 73.8949517122417 | 61.8997157694697 |
|        | 106.804269453898 | 71.5249259772583 | 126.753713093485 | 73.5950442915143 |
|        | 101.144615206297 | 73.5161632100822 | 74.4062547641529 | 70.9767460064692 |
| MPV17  | 263.44529683749  | 176.861690566909 | 409.312313055794 | 293.040690378216 |
|        | 261.195021649777 | 236.488376031891 | 197.608255265624 | 302.730527540866 |
|        | 181.531005915656 | 282.802560118785 | 286.340091833711 | 346.844545554188 |
| MPV17L | 48.3814421939888 | 41.4508241771315 | 49.3000844711116 |                  |
|        | 43.5627649099623 | 52.0583273941813 | 43.3785777889265 | 53.8687221233237 |
|        | 50.628152951493  | 44.7058233759912 | 55.0016608333828 | 40.8225507267584 |
|        | 56.361708620372  |                  |                  |                  |
| MPZ    | 40.9558083259517 | 38.1312950900467 | 40.1985790927248 | 40.1804147506786 |
|        | 38.3561682218911 | 42.357910063876  | 47.8947595316832 | 42.4580504587581 |
|        | 37.5469247328848 | 38.4187686307607 | 39.6403089864678 | 41.5536168238478 |
| MPZL1  | 229.47693624489  | 171.073367662623 | 218.217851814655 | 150.009352890706 |
|        | 231.893992191022 | 193.262615637464 | 218.19156738004  | 142.309369995384 |
|        | 158.557256842416 | 140.35042464015  | 133.1387411908   | 131.238796973323 |
| MPZL2  | 247.193935816149 | 556.092573451208 | 534.629009719855 | 109.649431670339 |
|        | 455.223217772744 | 101.337735124049 | 342.643344197936 | 311.668075784386 |
|        | 654.682263833024 | 651.969296681551 | 477.023373302787 | 913.704049709264 |
| MPZL3  | 42.9104454767916 | 34.6306468196142 | 35.9305494063137 | 44.0451487108213 |
|        | 45.6895223823001 | 32.5219627196161 | 47.7390230243778 | 38.5457716679071 |
|        | 41.7627910693483 | 38.8507804383261 | 39.153226699662  | 45.1735152121056 |
| MR1    | 80.8943070653517 | 122.44445355345  | 276.699609951994 | 151.831767769522 |
|        | 108.479856042609 | 72.0674952635945 | 77.7615826856723 | 64.964255000378  |
|        | 105.328975917946 | 105.414552529943 | 83.0554837248934 | 146.87603018486  |
| MRAP   | 43.1267841876606 | 37.6692107065488 | 39.5118967430322 | 40.1249533205858 |
|        | 42.3685136297603 | 37.6455751461448 | 40.369768755239  | 38.6454098044474 |
|        | 35.860430241131  | 37.3179578037963 | 38.3684202018524 | 39.9519547348106 |
| MRAS   | 72.4966502412724 | 48.9899488302637 | 42.9104454767916 | 79.262977183608  |
|        | 62.9553576299033 | 123.321810678947 | 41.1507980856436 | 51.8347877274018 |
|        | 50.6750785584772 | 69.1623287497421 | 72.1955435994725 | 74.8170892324966 |
| MRC1   | 43.781101409552  | 40.716553247236  | 37.9482157381008 | 41.7144525110048 |
|        | 40.831207953647  | 39.0266821712099 | 39.3999056968598 | 34.3473914754963 |
|        | 40.3662560853635 | 38.957687788868  | 40.6373400186325 | 37.8490162439785 |
| MRC1L1 | 37.8386378737561 | 41.159706131351  | 37.9482157381008 |                  |
|        | 50.5310598656998 | 39.9697332660833 | 39.132725377815  | 41.3594868055879 |
|        | 42.2577689927563 | 40.137818555383  | 42.6793753550854 | 37.8372168909583 |
|        | 41.2437378488025 |                  |                  |                  |
| MRC2   | 74.9741052063425 | 50.7487159427973 | 45.2313723727673 | 43.3078542962968 |
|        | 47.0954207417646 | 70.2553917409773 | 48.8319884367456 | 44.4031868028216 |
|        | 41.7627910693483 | 48.4890615340603 | 52.7817052791259 | 39.5418280570561 |
| MRCL3  | 3884.2191293028  | 3690.00752647453 | 2745.8277126123  | 3966.51586153125 |
|        | 2621.65272077828 | 2331.12401106076 | 3282.4852236415  | 2921.68921750799 |
|        | 2196.59044510709 | 2306.14613042834 | 2184.70038900784 | 3592.44409869527 |
| MRE11A | 58.4920021605316 | 63.0245691276326 | 65.8986841086198 |                  |
|        | 57.3897761846546 | 70.0965466297064 | 54.4190527512508 | 74.7534423194688 |
|        | 60.0502421545569 | 64.863894209343  | 54.4059109100338 | 52.5645416722441 |
|        | 63.5489745357606 |                  |                  |                  |
| MREG   | 50.7390160399184 | 57.0875538213735 | 44.4311655729487 | 56.7927450229377 |
|        | 62.1836961153924 | 46.0364000143537 | 49.3854238365325 | 46.9986083378817 |
|        | 55.9423752286714 | 37.1275334308172 | 49.2206713037152 | 50.3118072462443 |

MRFAP1 1026.51177853708 1017.1803754111 1345.37091574015  
853.947671456736 1214.73798692268 1683.24873205783 887.118866402149  
777.854349637516 1516.33074288338 846.773659307087 1029.12917222294  
1259.2978319548  
MRFAP1L1 203.127486721124 217.533011278692 267.024267633341  
211.451463038315 213.118335449552 306.746364062777 191.141778714144  
177.688415930665 295.194516063502 338.475097952023 309.802432824498  
276.633536223159  
MRGPRD 45.4799270968969 42.4493032770053 37.1643693306382  
40.3180310664156 45.3675390992851 48.1591264215184 42.1607322031054  
40.831207953647 43.7630587657205 41.4397539024976 40.8225507267584  
41.2437378488025  
MRGPRE 42.2455707947223 39.0894172982439 43.7630587657205  
42.4580504587581 43.2484996523549 49.1013967533186 43.5627649099623  
43.4544762830742 45.0017158586743 42.8936990772838 40.6373400186325  
48.9733758107788  
MRGPRF 144.17470770145 62.3102413989199 54.5191471810265  
79.5838979704243 52.2089306840125 274.02972772427 41.9393838138203  
70.9702772728923 45.3756389170606 134.749803376372 206.481424743576  
118.696127260286  
MRGPRX1 33.0463640202858 38.8336427948187 35.3649449469275  
34.8137085420423 36.9702228618069 36.2768299545794 37.830876898596  
35.3608605269276 35.3227485563945 41.6373771565199 33.4071187618571  
37.0953622406687  
MRGPRX2 37.55264801907 44.9370339275041 41.3366779545815  
37.1894304543751 39.5595233162192 43.9724628401189 41.7614975630362  
43.3838505886856 37.7805366040928 37.2686490268265 35.1470994647364  
43.0322714179517  
MRGPRX3 43.0930293831497 46.6996902348633 42.0621425894624  
45.0798408927912 49.1928206164702 40.7616966228404 42.2577689927563  
45.0972184964705 43.7630587657205 46.441301934328 44.6286581923295  
40.7704587752083  
MRGPRX4 37.4554876386402 38.5252456306656 38.6727842796202  
42.5664883002833 39.6535880152834 42.750861693377 31.5556621809114  
40.047314525032 38.4344387289956 43.401782064778 40.3452320167286  
41.5536168238478  
MRLC2 3428.74022048394 3575.78813099057 3800.19142219719 2528.6392272518  
3055.1209535841 2009.75680599899 4259.50675863393 2934.35616793443  
3634.98300564068 2755.23573327276 2448.64580552439 4148.07163380544  
MRM1 45.7356815244513 47.087835967892 59.1040441894478 48.309866878365  
69.493532577364 45.3882138838137 69.9214859673839 45.7476095696859  
76.1869593072029 53.9412154719864 59.501103909345 54.4992295592001  
MRO 37.2474303302343 35.0222940937513 39.2707964550441 41.5464765641928  
40.3452320167286 36.8059561571675 38.5066108855005 39.7509165247419  
36.2733735494625 32.1011040606811 36.43924066428 36.064718696392  
MRP63 63.2753814090696 83.0752710669987 63.197604174872 87.3508610599789  
66.4047895961325 82.1144251872199 91.0154871536701 98.9113424606303  
66.1448688879431 88.6207486236976 89.737418965763 80.3805507705979  
MRPL1 79.5531316151328 108.734392572981 71.0340758556049 61.8997157694697  
91.0327980861321 99.8323169037315 64.4736987797413 130.960165577212  
86.5616422570166 78.7543199947688 73.3321469094819 89.3868257841517  
MRPL10 56.2508140932179 55.0897019602305 58.5212649095879  
53.3039668850879 62.8270556619309 61.8187341713197 61.0207757595269

69.6473843718254 65.8332717237037 72.4834467838798 60.4620008899889  
63.3578893149245  
MRPL11 145.561345203804 190.548265163011 164.709142211696  
154.633672616367 336.795797976236 265.570814613305 409.724772942357  
253.683753201667 323.957165066178 175.259060743495 181.45962058846  
184.235914591152  
MRPL12 326.805803266857 401.347734852083 321.171736253617  
301.525915314179 618.892379887961 345.615640348066 1076.05074395483  
542.467997217663 737.604036996153 320.452418537108 412.880824530845  
286.879774045206  
MRPL13 270.44099301072 208.529062113623 114.84900130932  
128.786137360755 103.199200862158 89.1290937615998 151.99110418225  
146.594288395595 199.123340814127 100.413031488199 87.6689055777294  
175.652989203497  
MRPL14 1255.10866316499 617.271611375695 567.393665550133  
459.021889198824 1107.96086673001 504.847507464269 1111.13061382818  
348.165210494253 646.323419285676 300.560071753181 375.354746298695  
415.15150032168  
MRPL15 408.739953606815 371.513106715598 241.706783147271  
220.977092747428 335.943994595615 226.926786963011 651.078746026341  
302.143385957116 433.194113859912 199.54796711653 187.486245101512  
190.375732394043  
MRPL16 58.3702889417801 84.3995736970187 65.7670524353661  
40.8681871019812 87.3957386451235 81.3978207813439 111.367789538268  
79.9597944271831 83.9387217886961 57.7805922926828 47.8988096575648  
72.6182747525443  
MRPL17 353.338686666875 331.591589534469 443.581460031166  
308.841311505431 272.930242946726 186.965367827758 347.334340102921  
334.90764380842 320.391231952436 260.093838596699 194.703024752864  
293.410413883219  
MRPL18 584.724083441601 407.249003342541 399.410299413602  
316.548339196872 372.421330252979 408.080620074472 433.194113859912  
301.198565023795 335.569876624791 305.119894105297 328.176884082116  
488.277500837251  
MRPL19 55.1306642449627 57.2871072823547 49.6347864008749  
50.5310598656998 63.686652234709 47.3791873993182 54.8074655158941  
69.0819394834919 65.3672880026114 52.4351670989268 49.8393069675192  
50.379587451669  
MRPL2 192.058030454066 96.2280884890067 130.379966531543 100.774098314706  
126.670728021682 98.403191200835 206.571946834892 158.493140172253  
106.521012342668 146.311363191836 128.219615202232 105.446338599737  
MRPL20 285.053017606956 293.819595688805 227.567182783564  
282.196234758364 370.088974562672 457.860665614779 390.647843814517  
311.810240385503 317.127679512963 165.867229890877 218.510816443243  
257.761541860837  
MRPL21 234.873589896708 237.632703283663 210.485586903711  
198.324467851365 361.945511835039 345.443895623911 331.885872312948  
280.526935074437 347.552309199761 172.748740911831 184.50283792606  
249.729778471447  
MRPL22 372.421330252979 211.451463038315 391.397318564183  
288.335410596699 370.917477324773 302.79352975792 294.220232101389  
387.867128019374 448.787414220553 287.565588186962 280.490447179545  
421.279008280368

MRPL23 399.66182195331 841.850722284484 343.892794667047  
628.625814917301 260.824949424185 470.231929311877 844.431085166353  
529.977491403949 855.157599239267 747.577738135496 732.454837219705  
503.187121806288

MRPL24 265.520773157991 325.769076169162 512.951288394692  
236.727577348109 371.513106715598 400.327164003217 392.237227927376  
287.689260887067 370.495645380436 390.202312411165 409.554706384667  
539.720977763663

MRPL27 188.042978085327 90.0420794458477 96.5175130622216  
110.88526946931 136.998739859195 124.490684428024 155.617122020913  
126.218285718433 184.989940464859 191.09175268141 189.737472782071  
158.449570606242

MRPL28 99.1565755621214 98.9017950719795 149.397632479523  
101.403739410832 96.7351644023249 89.3168921945222 129.143252341926  
66.0303950772736 157.870937745052 94.4129246851651 124.350816245276  
90.3485862002091

MRPL3 512.255695437272 639.391575249793 427.972184856393 408.739953606815  
1236.32289322872 595.012422454829 666.265306908449 472.982369155078  
596.84269596976 221.847615564378 284.942182200489 411.73316510051

MRPL30 66.9020790116382 66.1288889125299 82.8770530537113  
56.5357495488911 86.033725825968 74.2180011215707 62.801431502597  
82.3364971911816 70.2888664894537 57.8585041080995 53.0798381965427  
71.1894129030602

MRPL32 302.667538432677 290.761706869722 255.724996015069  
210.807094064209 340.662853333208 272.828896268482 244.707381127491  
286.243476131448 414.794323433931 190.375732394043 193.235216590157  
267.232315058148

MRPL33 775.515071756239 392.796524588309 370.64147085217  
501.319993127353 716.434968700383 648.380417557148 744.762787024945  
559.296669575666 467.645011859047 450.515644056585 439.106576928682  
983.972164685474

MRPL34 319.328571608303 236.307055572306 291.94914449218  
269.963186760811 550.100918659768 427.818758455214 189.650905999631  
180.679129876248 263.21493129287 200.203393423652 230.401917528056  
359.465715235071

MRPL35 127.160252453685 158.071355628454 151.912182086236  
125.997088252817 147.498355916596 156.088284999883 103.913834330352  
204.992039590717 193.806701229141 124.310823604006 118.10944558223  
149.950764820034

MRPL36 860.265067346622 604.951648398924 520.415257194417  
515.409979010663 1789.07186722972 621.980260052085 1223.01485352248  
471.297503316471 613.27814206548 255.636379050741 268.072653271299  
470.004780385708

MRPL37 1351.49940447914 865.63777294494 719.815240381415  
529.210992541911 1749.06320703181 617.808073077341 1641.74760448254  
1106.57048989685 1185.41286656121 680.837950890159 734.705859548078  
500.168833003599

MRPL38 158.637047990511 178.012676342712 127.49459343016  
78.7450149191851 157.658760470424 127.937436596431 218.19156738004  
186.450759425396 264.495576211074 167.982626899395 186.002828997122  
135.138667957956

MRPL39 85.5362566454799 132.730723037077 152.555556133364  
93.4853597306163 161.305278902051 94.7008981904016 127.418173390084

72.6450859740011 114.404099081799 60.8250302910721 68.4352167527791  
121.036604456449  
MRPL4 56.7635847444447 69.7610390623756 73.0970339739187 51.4573915545728  
165.121380058529 73.0464199386528 76.1162400934059 67.8061298261394  
82.2266112813039 67.686778662624 69.2406343120143 64.1158872395764  
MRPL40 192.536546957155 144.633447485038 204.009492151839  
219.555240189863 206.514263103112 225.161257242118 175.165302282522  
256.55408314817 220.766843166754 203.152852313746 167.824386984618  
276.86542239106  
MRPL41 536.73426937255 419.741944629785 282.445037659981  
300.935346370468 589.395944599882 378.358853591082 571.170643523692  
405.148979342648 494.733185937057 456.757277476069 576.367042159347  
339.679549262298  
MRPL42 71.8314470868658 120.771048750176 94.8260360398356  
79.3066495980045 105.589475270494 75.9713712509177 131.097521229971  
110.746059249478 163.011116329807 75.8280474316969 69.652475454588  
112.805898501551  
MRPL42P5 38.5007204246293 39.7835513496873 44.6032218589199  
46.4555908533915 39.2608760193011 45.4882438975269 40.0052661202207  
51.1694248620208 41.2870505273664 42.2614524730856 41.9908237694988  
42.9887069977696  
MRPL43 127.937436596431 174.961427864327 216.45007990575  
135.138667957956 166.983092667334 202.459251553516 185.924923239764  
103.631449539809 156.311985997533 186.840847924376 177.80178351875  
206.072527867605  
MRPL44 89.5349434357106 82.6602736441839 95.2915739972533  
79.1998092110487 108.815245119101 71.9329028989527 78.1204313889396  
78.9563955412096 82.4975645442705 64.8549209064366 65.7196733766698  
75.3271272345679  
MRPL45 149.515611848932 180.930509520136 185.264053754114  
96.7799695976296 241.599353653369 145.170590045628 178.306763765612  
170.999578495858 157.927114480316 122.924027019519 134.113913870501  
190.61997068475  
MRPL46 289.213144287085 272.604402990069 190.977045076469  
219.918644151214 357.96130075479 268.309382865636 341.97050042695  
303.670126704469 353.213447404132 190.442443946259 254.472291205905  
236.407697413249  
MRPL47 69.8001537510565 66.0479079234982 49.6978906361694  
67.7121534934164 83.2652824564032 62.801431502597 73.5993692960562  
74.5822971881866 83.1702007661831 62.1035858593388 51.1483696410762  
73.845912534353  
MRPL48 71.4276813927272 85.2893380711323 75.1477470681238  
76.2591822114739 84.2158827857221 78.812106589086 90.8691042645133  
109.241121384212 101.46584765758 95.8075612515186 82.0206083292981  
95.3145142003966  
MRPL49 71.9062462001972 123.480244775709 125.383837024985  
78.0020909283414 157.774096599452 106.78552222475 175.632783805966  
135.997802304719 143.478533731355 118.244019427757 120.771048750176  
107.585504340548  
MRPL50 176.02137177982 151.795609904857 90.3485862002091  
131.027905075083 165.440751113862 148.144200968432 137.335224748204  
150.011814577972 116.388069891158 110.487281983469 116.490154128114  
220.938982373755



MRPL51 768.888528247493 589.685739519627 694.590958116425  
500.794458547464 785.79878416775 768.888528247493 1037.51323185348  
734.705859548078 1151.25293766167 519.351335801817 543.975237512604  
640.407302868904

MRPL52 200.019523376661 143.728143059207 106.443777149496  
138.581471125405 140.598583034034 110.399579382196 192.003788858976  
71.2327757437041 142.840631375936 174.860894067053 165.107387190373  
187.836567614419

MRPL53 153.767031974664 206.703865774092 213.073369426342  
200.93077689667 266.702252514277 270.394857925086 204.251854342995  
230.117814622646 318.920760335454 158.478919789334 189.737472782071  
178.98901256658

MRPL54 270.89711217076 366.129480083279 355.288272452203  
379.473739290565 392.409679550956 477.263677441074 343.304521604977  
232.516262874696 442.380936516984 342.559364715094 356.410753280729  
374.427492246826

MRPL55 241.08817915181 228.747320301945 304.49707512712  
227.686495419561 304.133852957499 287.423909789368 312.589169184897  
328.855843739232 206.703865774092 279.521995263196 237.359267889848  
210.059998353905

MRPL9 135.737771384104 111.77505926669 120.401643722713 99.8063480813138  
176.594203350958 113.839604953506 146.42128243217 193.569399061809  
109.828760284519 82.0149542477384 94.9001252449925 106.020559220488

MRPS10 352.768184657577 429.144004652368 486.487366153374  
264.263104842911 362.506098778318 320.330057050615 332.933704863586  
233.710655978992 378.964387825252 362.196116025799 352.917938567734  
395.298033031033

MRPS11 364.962649416567 249.942109342324 187.560170529807  
303.323289734056 510.82619253142 298.924873508403 468.573956652904  
462.362735276132 416.972264086884 330.892010103508 269.184000351658  
276.795797048951

MRPS12 272.545033107746 203.178221073902 186.161177110898  
159.440571032045 542.901822331329 191.523447800488 477.023373302787  
313.763121699885 300.560071753181 184.536327776767 186.965367827758  
153.797431763616

MRPS14 53.2046867327331 60.3928833351886 55.7764940944098  
51.223859150798 61.954674965065 70.7238101239421 52.561573697155  
56.3560498705517 62.4776210012906 51.5855515705917 54.4140381300469  
59.2035499250243

MRPS15 779.996851709716 649.487838020327 556.572994352617  
494.733185937057 909.843512894628 651.078746026341 841.316771679857  
780.708896888794 638.305455110267 451.520414426616 440.93348620369  
592.205084997276

MRPS16 183.690616959682 216.247225354243 178.269900400454  
143.13189461696 209.281870980564 156.754606475323 249.148159759128  
279.485290822376 574.467486140819 274.731304343034 230.197573134703  
187.601223003233

MRPS17 607.042450917813 196.465477936749 191.298525555624  
175.673196925527 574.847203528544 188.485585236576 327.878405194732  
373.626843592567 287.565588186962 155.942366087388 160.566474370004  
286.996922972683

MRPS18A 190.130724966304 106.595042669127 112.421316052392  
85.9087280306456 128.981582396627 98.9560329133205 205.279698624867

116.967446594767 147.579873410455 142.731630650904 128.806903044733  
137.632214490732  
MRPS18B 190.214361156876 192.398575159246 206.146732318529  
123.729687262037 159.588684603267 174.559216176175 282.961489041903  
128.635811501506 167.678403380953 162.272853632419 172.317945975659  
207.0155359394  
MRPS18C 249.995119246929 232.628747594691 241.017227991238  
272.663785805238 215.800662077432 245.691073028699 204.251854342995  
259.855509977658 241.202687910704 143.278668481091 123.618276821013  
264.924262411772  
MRPS2 380.736562250846 180.475056805817 128.032613585193 159.440571032045  
273.764998628636 175.271140689255 303.281551940647 184.025325436339  
161.205086002542 245.489660195494 218.999184133546 145.572606290643  
MRPS21 661.718946652592 538.572110053093 678.996864855592  
362.788520130059 1047.33749100342 655.389317052689 530.314249832491  
785.79878416775 457.502917254598 378.358853591082 390.834121304799  
492.13077103258  
MRPS22 462.762837284748 410.058119360034 485.139076884109  
399.733432664718 683.75696650704 471.046851874447 589.912813291296  
446.37035118289 641.462632112151 402.221227674218 415.759723627205  
505.650842529816  
MRPS23 136.155022329495 111.522812019895 121.120217132666  
148.736019591731 165.974848305379 121.441763452598 130.211586013657  
128.291287011686 170.150808455621 102.880267177687 104.398842509776  
124.18058128276  
MRPS24 603.737787922337 467.645011859047 468.381233506231  
446.019275317482 915.936211119242 607.431621448599 700.477686061791  
498.608204176238 784.268074988084 445.875994521817 474.55435126505  
528.840700144811  
MRPS25 85.0753342967819 138.070735985503 159.571799428131  
74.6159297822533 216.358862796367 83.8726595797859 85.8154958329408  
149.386774957393 111.735319884512 174.685146336531 148.906660152784  
107.91849682084  
MRPS26 368.162822151919 552.860979481958 343.304521604977  
171.238235624104 645.702744916884 244.837105178705 662.041552795049  
260.093838596699 325.769076169162 283.695442036373 261.687486828996  
309.593721653575  
MRPS27 200.566335168667 261.421333472097 267.29148042787  
167.229755109155 249.308868215205 271.393858310441 177.958475301951  
157.774096599452 267.170081805168 280.820745089796 312.795596385258  
312.245547906683  
MRPS28 249.148159759128 291.021345839327 180.128769312512  
127.375858030077 158.464244518317 156.259762538052 199.404836798715  
105.743957034577 205.55797140415 113.655306804539 151.255948388415  
212.353676518748  
MRPS30 255.986778613019 489.983164420779 368.972794063004  
244.167954467328 547.072513229674 230.401917528056 804.592753722875  
436.757445186987 484.482971152057 179.552011806692 219.134220280612  
289.05213385509  
MRPS31 324.223368470876 272.604402990069 284.351747562807  
293.040690378216 210.282066967005 217.293240552946 301.139592414061  
209.87862540213 256.843419520398 327.193250073326 260.062749979574  
317.0659599072

MRPS33 217.456127221867 156.197625493702 229.621795088195  
191.523447800488 270.724111544154 193.043344611355 164.96500173066  
171.536394606897 263.937966521917 162.07814488773 162.23769718358  
271.393858310441

MRPS34 62.5528124447176 103.43536623122 143.706880936186  
68.9937449813561 80.8238125943267 72.2544131004774 119.124583755587  
54.9919060580109 110.467254789988 63.0119737420787 63.7963501146829  
65.8959431201418

MRPS35 133.742988105942 175.936150174315 139.445008123768  
84.4422623834916 125.891602778425 131.451150955309 121.593655679081  
83.1702007661831 188.979306100283 77.1767494799711 97.4062608315831  
147.902378647394

MRPS36 88.8760662992208 67.8999127712557 70.8606919488782  
72.0694688774804 68.1674425673171 74.4508307047509 63.7721358300879  
73.8374823243007 70.0801020070064 90.4160198134865 77.1900613562529  
78.7496673195407

MRPS5 231.333080775773 190.130724966304 235.613437037284 151.344720108793  
260.185079572615 198.821443323024 177.088290547513 204.502683458676  
245.194730981772 215.645475520124 202.103107745135 228.703786640132

MRPS6 873.451893437179 1043.26325848938 1738.00955642263 1194.67103388675  
1570.45778081591 842.82310025167 893.185203928127 789.511653564341  
1062.93431683428 1149.02954135912 939.453799186397 1345.37091574015

MRPS7 171.176393131741 171.135041358339 149.185115531381 179.47783529  
248.599530435666 151.36347984261 330.946598275585 170.048690747909  
326.805803266857 181.029293055674 173.236617176892 189.705164944697

MRPS9 312.7217964763 364.439669236186 392.237227927376 255.42436389413  
362.268767190535 385.064309855006 363.602775933416 396.63268714181  
374.427492246826 325.990132666873 317.669452297159 305.735573572576

MRRF 91.5417574979683 122.331946672266 91.2297566574871 99.3396385536245  
118.450965500771 92.0606634977068 122.069202960387 91.7227477250701  
113.964753321316 117.699959435983 115.10044062133 118.870675731224

MRS2 96.0907205856398 97.3813557754832 90.807818984128 63.4531374125233  
136.272019225585 80.7067505750848 188.552900887757 173.357715186701  
88.0877175295544 64.428683021978 66.5063354430003 78.7496673195407

MRTO4 175.632783805966 185.563590013028 165.613176704286 168.561260174501  
315.065866567211 193.875712862166 336.795797976236 229.26498093497  
211.829374574045 143.053774297331 166.097017297742 128.717988447086

MRVI1 48.8941062980393 48.1627097465883 45.310660704531 39.9084621723809  
43.0723817756832 57.678188678075 44.5390641547628 46.2286164776607  
47.209353240759 56.3638387329017 55.0031529299037 49.904979214379

MS4A1 40.9558083259517 37.920964499903 39.9552665886217 43.006072841282  
39.2608760193011 41.3553369544097 40.2669497398702 38.7981173437121  
39.2809305246091 39.8511044247748 41.4508241771315 39.2780515621926

MS4A10 37.1485601150873 35.3307157989724 38.8775560911841  
37.651298468202 38.1644569189523 36.9060997041453 39.5496902678788  
43.0390857698452 34.9428206949566 34.5718473203083 41.1638563416981  
33.939263369489

MS4A12 39.8662795144616 43.683792219729 38.3166554965434  
43.4410741327254 40.6723334103791 40.9506062495231 40.4359177791566  
39.0620487644635 37.7384958256497 40.3235655331796 41.9083581529276  
44.7401523707775

MS4A13 38.385865183581 36.3517823215525 41.0356368374708  
37.8442841690502 41.6806984441849 39.5472604976664 42.4939802311136

39.6995529770239 41.134180463103 39.6719190054379 39.7576136507593  
39.7411455670172  
MS4A14 46.5549623118323 40.0952076421149 45.645828394758  
94.080489738662 43.4544762830742 46.3203995372658 41.3594868055879  
51.8347877274018 44.1211971585961 43.781101409552 46.0513515682555  
48.0080291106034  
MS4A15 34.2180669723984 42.4493032770053 39.991353369336  
36.7892997857376 37.4470183315826 32.2133093774284 39.6535880152834  
46.1673159982664 35.6970528713709 39.5637454855233 39.153226699662  
41.1554481567603  
MS4A2 48.7646976789783 49.5443425465542 48.1997158668729 50.2163892855092  
45.2556760873335 237.864776225441 44.8643898647322 41.1575777497576  
39.5806465938526 99.7807691901691 57.4622430729629 51.0647893605839  
MS4A3 38.0508336668122 41.7337506166619 39.5450079747895 40.5836765833864  
39.7148429644689 40.1846227436522 39.2809305246091 39.2262196979245  
39.6426041737369 37.2089297656361 38.745552403895 36.6603338274678  
MS4A4A 48.1952521496489 43.8336862998829 44.4311655729487  
81.6233038764401 41.1493778437527 74.6847594297153 40.3850714987723  
43.9366081640576 43.1805016690297 42.1414432370095 44.1148826235374  
49.1786207920603  
MS4A5 37.9387791625384 41.0678614026819 38.9790184198145 39.853175885492  
39.7568367479301 33.6859433472087 43.5627649099623 37.2237132058632  
33.6288663955758 40.2112371512838 41.0808257270221 50.2163892855092  
MS4A6A 168.388385941598 231.085533860683 230.014127346507  
824.946988188872 156.69976952483 614.088027946471 126.14245679817  
189.111092737256 47.9035532886869 91.7629175712824 63.6057995724852  
204.423912426477  
MS4A6E 42.1537476443423 36.6968906669565 37.2838080935695  
42.4580504587581 44.4489662507893 40.1428591998404 45.8980298854198  
39.7509165247419 39.853866204927 41.6373771565199 39.5399188536544  
44.0451487108213  
MS4A7 146.249568587351 115.557690369703 140.586248661832 753.976423227915  
117.574549567 418.693470287372 101.250422688816 160.264217082275  
43.9450023643394 62.1035858593388 64.7023558190673 118.806070800059  
MS4A8B 46.8141313516997 45.5842286511645 36.6522278218553  
44.6905691366696 44.0451487108213 42.2577689927563 47.5963750520409  
42.7431359850339 41.9635525160083 46.325232414659 39.4410515050885  
34.6720534245631  
MSC 165.775214685061 64.0096843640535 45.4865173433646 148.333778341005  
50.8875036861067 79.0940380276977 47.5963750520409 120.850874262069  
39.4762546236449 56.8201201798712 59.7269454048338 63.6254894053045  
MSGN1 46.0920218698606 38.6414316877471 37.5597671487621 41.6564075217517  
39.7568367479301 35.6125439901743 41.9393838138203 41.2551966132486  
43.4656637536244 51.5855515705917 45.7328341667151 40.6614700944853  
MSH2 46.9395507483816 42.1372626664516 41.6550823405646 42.357910063876  
38.8834538955 44.6024422254257 47.5130990528612 53.2046867327331  
45.3407340000202 41.7932258301997 42.170702295259 42.6758568421347  
MSH3 5525.13078364599 3999.32180022337 4368.11345948444 4368.11345948444  
3166.48568397766 2854.82112538867 5297.71706629059 5018.90384962952  
3166.48568397766 5387.08056045279 4503.77675488367 4093.70002166179  
MSH4 42.1537476443423 43.1805016690297 40.0998167098057 38.9534635879195  
46.0977687311222 45.8325181856483 38.4005795891396 40.047314525032  
46.4164127487052 47.8207974930031 41.8168470823451 39.0536056496869

MSH5 58.2297667026887 50.8518516627382 58.9880711073443 54.3959011882073  
60.1258784595219 45.9266745571724 59.4465684293847 55.7246872330059  
51.9545473262296 55.1563703466328 49.5539622682049 48.2135563582448  
MSH6 532.581631305218 240.786294140861 195.168348967505 201.360008430353  
228.439524702578 282.764445883135 481.145001682177 632.577797921655  
376.749116251503 303.458085392002 228.778506556448 330.391945158969  
MSI1 53.6741873729867 46.2286164776607 45.5883690965192 45.5869891570251  
45.2556760873335 46.6872654833579 47.5963750520409 47.2864663693787  
41.863927676552 37.920964499903 39.2542963855807 43.2776458914333  
MSI2 83.6351558609087 80.9160262677505 72.4597726467555 64.4512696384839  
89.6313467455698 65.644767142472 109.374838860558 90.500550952567  
132.036058401203 77.1767494799711 92.5391033814713 77.5290879537731  
MSL2L1 50.379587451669 48.3451401499671 48.8941062980393  
60.2877434874622 51.4092491522288 57.013135787334 46.2407656943956  
49.9332280449549 53.4292590928092 52.6040246568056 53.5966673719267  
49.2731519807085  
MSL3L1 65.9273663561152 84.6158251687884 62.5194460957899  
111.347228208501 74.2004711747326 71.5249259772583 94.4034248132634  
109.005343769033 68.8058577447202 69.0530953932111 68.1992221684165  
71.6890300780549  
MSL3L2 39.7576136507593 39.1982470626863 41.3366779545815  
37.4223289687135 34.5301949364147 45.2852528185486 45.223075311113  
36.1375121409002 48.8067321016961 38.3092241935352 39.7342718293432  
38.2350720635382  
MSLN 66.5500089527674 43.1805016690297 55.3812135024656 57.8277957325085  
50.7615314686244 46.1513019317765 40.3302268293707 90.2915974511786  
53.838484549134 42.9866214102525 53.8856501960117 48.27609330316  
MSMB 44.9210663878929 70.4607501403122 479.696469083953 39.8920832347262  
40.8873907150245 49.4944276762428 45.4799270968969 42.0494116081998  
41.863927676552 155.564141715819 86.6307051127248 51.7154514744518  
MSN 756.801598119483 426.015657750123 633.602650842189 1813.65521720537  
270.543988412382 949.278493776928 229.584451980272 705.283979182062  
216.358862796367 655.389317052689 638.848775860866 528.512401493184  
MSR1 45.1912496459517 44.0578434007778 43.4709415392696 61.6702707724448  
44.8248621498677 64.9498081060676 41.1818632392526 38.5143356726527  
39.8022382792104 42.2614524730856 44.6892782664938 46.5975976305093  
MSRA 91.0346886951891 166.752205770965 318.768560912915 246.869486382264  
95.2833228196616 196.427458710993 173.536155357688 87.1561568256908  
176.816741656659 205.378123452174 232.019748665806 216.45007990575  
MSRB2 460.162024551004 316.419421649196 637.035929429013 451.603052501528  
385.827237353675 1065.70206468134 386.506267846839 515.216890329893  
478.296779356592 746.252816568691 655.389317052689 701.168333137671  
MSRB3 132.985150338484 67.8774399765179 68.2246693773318 86.9274372004388  
69.4214927857472 843.333981146512 40.5585676679482 61.6839343510302  
45.7911932481722 216.976116788572 200.483228109704 343.016541928592  
MST1 95.4841914842335 152.66454549157 124.551483147457 77.4676205299631  
328.176884082116 79.5619528847913 145.77302334589 91.9919654450652  
100.389686642657 156.456239358718 139.614715580418 161.526970033915  
MST150 85.0753342967819 45.4143854024453 48.1331309338997  
113.102823481296 56.9360840563854 51.6053353177789 39.3585350448719  
71.5062409407193 43.0930293831497 59.0630473216622 53.4088637045445  
67.9850517608624

|        |                  |                  |                  |                  |
|--------|------------------|------------------|------------------|------------------|
| MST1R  | 72.0334593545916 | 86.277692569799  | 357.44124276077  | 49.3654837541353 |
|        | 49.452985143568  | 38.3418933808844 | 76.4889974392545 | 46.7980335276155 |
|        | 164.072453709966 | 157.020685801527 | 109.844156801015 | 139.847976281228 |
| MST4   | 100.586064920239 | 190.703466372947 | 91.2769094348604 | 150.457246020334 |
|        | 205.314410185216 | 125.503897988367 | 205.627744150936 | 168.70463124443  |
|        | 138.170787392253 | 132.036058401203 | 111.760213205992 | 227.170944398338 |
| MSTN   | 47.0940613507321 | 44.9370339275041 | 39.6451483836089 | 46.3203995372658 |
|        | 35.0181575202066 | 37.9003288112261 | 41.8315602975157 | 40.5158867964016 |
|        | 42.4540072551568 | 46.7646877499666 | 40.8225507267584 | 40.9683275553869 |
| MSTO1  | 57.4376528157926 | 53.565717255469  | 73.0128142320238 | 43.8002456102021 |
|        | 54.802736966312  | 49.1013967533186 | 53.8687221233237 | 66.4207938873541 |
|        | 51.8824384192988 | 61.5635554619635 | 67.2575005672188 | 52.7530873093837 |
| MSTP9  | 48.7646976789783 | 45.8669209716694 | 44.4311655729487 | 47.6687908290818 |
|        | 46.7508829977587 | 41.6590564937735 | 43.9450023643394 | 45.0972184964705 |
|        | 40.6957787921451 | 45.6868589181768 | 51.3103617600342 | 45.9693232070002 |
| MSX1   | 150.685575301101 | 87.7460859694899 | 177.067668324062 | 69.5544840164738 |
|        | 143.084029849218 | 687.862452802453 | 67.3976855661302 | 73.5950442915143 |
|        | 149.231260844854 | 300.057362423939 | 153.341618067133 | 156.433762355183 |
| MSX2   | 49.9419897484381 | 50.543526404059  | 59.0308764112247 | 41.6564075217517 |
|        | 47.6884372645373 | 41.4508241771315 | 49.8281348927244 | 61.3864512710242 |
|        | 62.9922928277769 | 61.4569050766419 | 61.8445915808329 | 58.9069025298754 |
| MSX2P1 | 44.1737502492846 | 43.4396866157171 | 45.3974838013476 |                  |
|        | 42.5193208629123 | 42.2455707947223 | 42.6575535390785 | 42.357910063876  |
|        | 38.9271399577966 | 43.3262148375525 | 43.781101409552  | 42.6366765186182 |
|        | 41.5132248356707 |                  |                  |                  |
| MT1A   | 1418.94307844471 | 352.246108891022 | 915.519281747943 | 4948.93803183911 |
|        | 2013.08489754172 | 4015.88651424568 | 723.853348464335 | 1335.4111951034  |
|        | 388.580556899321 | 584.724083441601 | 498.608204176238 | 691.94603958547  |
| MT1B   | 42.3433931248155 | 39.7835513496873 | 42.8270038153139 | 44.6905691366696 |
|        | 40.5710637884029 | 42.357910063876  | 44.3440839686558 | 42.2577689927563 |
|        | 36.3649677956953 | 40.2112371512838 | 44.1148826235374 | 44.3521099857368 |
| MT1E   | 152.72007888133  | 106.356074933606 | 119.979854891563 | 374.978401470437 |
|        | 279.063292799015 | 454.402224020514 | 119.747995520476 | 120.410726305477 |
|        | 134.504159974855 | 134.394743648475 | 110.865092573085 | 114.876346000655 |
| MT1F   | 246.624482943842 | 137.551493752877 | 155.392743674792 | 634.226367147025 |
|        | 183.498228118271 | 137.286091889421 | 357.44124276077  | 229.159869771704 |
|        | 186.891912776245 | 303.670126704469 | 176.064476306748 | 228.054565950253 |
| MT1G   | 152.054785478928 | 77.8946473414547 | 90.0767501615808 | 571.790034754076 |
|        | 777.854349637516 | 237.754990288051 | 298.670959394883 | 96.8240908274121 |
|        | 69.9767092409915 | 45.4614234442527 | 41.0050831223107 | 59.7999569757275 |
| MT1H   | 63.200752695983  | 47.015085768072  | 54.0536858212253 | 170.462982145147 |
|        | 104.220256076979 | 56.4819802857598 | 109.615289274998 | 49.5185112777773 |
|        | 44.8636979668258 | 47.1785588364488 | 47.1477056711335 | 45.9159813905292 |
| MT1JP  | 44.1294459089314 | 46.2286164776607 | 41.1367478979484 | 42.0102671859606 |
|        | 41.6806984441849 | 58.7404123614695 | 39.1539892144371 | 45.8669209716694 |
|        | 47.6195009345747 | 51.1169368198437 | 42.8263096141654 | 43.4709415392696 |
| MT1L   | 40.4639532172338 | 40.6380495994768 | 44.2405728317107 | 37.29566077996   |
|        | 45.2556760873335 | 37.3799542961839 | 42.1607322031054 | 42.4580504587581 |
|        | 47.0804681460898 | 41.3321861371202 | 41.9083581529276 | 41.863927676552  |
| MT1M   | 50.8388984085636 | 42.3550738181144 | 52.0742951366864 | 105.934378627264 |
|        | 59.1948983423381 | 624.954583057431 | 53.1884505015411 | 74.2517888452553 |
|        | 40.7847110517594 | 44.3648993568405 | 54.4825201506931 | 78.3467096982408 |

|         |                  |                  |                  |                  |
|---------|------------------|------------------|------------------|------------------|
| MT1P2   | 41.9407041937973 | 42.6022652963326 | 39.3709357615493 | 30.6485078361448 |
|         | 38.4540849632254 | 41.0582900711341 | 42.4939802311136 | 43.0390857698452 |
|         | 38.0213051227859 | 37.6383530120621 | 40.6373400186325 | 42.6758568421347 |
| MT1X    | 674.270050283701 | 165.905008152959 | 220.822548634548 | 964.268294825556 |
|         | 669.419736252343 | 1891.37245670852 | 322.229113548162 | 366.998712124711 |
|         | 311.943214184523 | 161.48562926756  | 257.259977650678 | 404.175196605897 |
| MT2A    | 2313.21212353993 | 431.353025968649 | 1330.19215036764 | 7627.46814033012 |
|         | 2934.35616793443 | 4368.11345948444 | 769.685677484067 | 2331.12401106076 |
|         | 244.786768738229 | 520.415257194417 | 539.471011648536 | 573.832332097619 |
| MT3     | 44.1294459089314 | 42.2577689927563 | 43.7630587657205 | 44.0451487108213 |
|         | 42.6022652963326 | 44.5544727111028 | 59.9792284253187 | 44.7044140979108 |
|         | 63.4531374125233 | 43.4885245598939 | 39.0550139257658 | 46.3411353377615 |
| MT4     | 37.2474303302343 | 33.8237407699472 | 39.991353369336  | 41.1886975241176 |
|         | 37.7576900881741 | 35.0970060242246 | 42.0605906240248 | 38.4540849632254 |
|         | 39.4762546236449 | 35.93950183586   | 43.5710871617107 | 39.5418280570561 |
| MTA1    | 474.729653426958 | 181.2179249806   | 224.249210397247 | 142.714450804595 |
|         | 310.461601607662 | 243.27954361539  | 308.183340806373 | 363.67768546508  |
|         | 213.028412890553 | 288.816567137193 | 346.285308869994 | 188.386331007465 |
| MTA2    | 113.866742186841 | 192.861174667738 | 114.404099081799 | 158.364437886751 |
|         | 158.853244260329 | 81.0880833950735 | 225.725485439572 | 212.395308461139 |
|         | 164.205608279417 | 180.53214143537  | 173.977605406146 | 176.839214683647 |
| MTA3    | 428.729935028911 | 130.848965290163 | 306.115856873599 | 104.335120306753 |
|         | 116.663501139305 | 140.063595285844 | 260.124930930243 | 341.078728185917 |
|         | 234.113622230498 | 203.53267380432  | 213.768352764473 | 192.112101000423 |
| MTAP    | 196.760671234837 | 205.854666205308 | 115.468303687641 | 123.841740274811 |
|         | 213.285274542564 | 206.450109223116 | 263.706801812277 | 137.034037711549 |
|         | 214.03015073442  | 288.386446189379 | 241.175454742029 | 344.133384411423 |
| MTBP    | 48.1952521496489 | 59.7098454699348 | 43.7630587657205 | 54.1240583139871 |
|         | 63.25187762908   | 54.7083331985678 | 56.0515443021293 | 45.1714698794331 |
|         | 60.0736861987141 | 45.5776159432079 | 46.0905079010237 | 47.1060577218993 |
| MTCH1   | 3465.3013599062  | 2440.77408185413 | 1806.22468459769 | 1591.51486001004 |
|         | 2009.75680599899 | 1850.06063216244 | 2266.34088015654 | 1478.26733379357 |
|         | 2243.24648907474 | 2513.15722262176 | 2272.91548405176 | 2146.1548633579  |
| MTCH2   | 42.5193208629123 | 46.1569135229922 | 56.4779645313958 | 37.7469621225553 |
|         | 48.0234896130991 | 43.7630587657205 | 43.3262148375525 | 43.5544347011646 |
|         | 46.581796165231  | 53.1993028936883 | 47.8284278211109 | 48.7814131120945 |
| MTCP1   | 253.605641311356 | 173.977605406146 | 274.493399403322 | 249.584588371496 |
|         | 286.340091833711 | 368.660803187338 | 253.237824005249 | 253.237824005249 |
|         | 251.803102904399 | 247.843927763772 | 226.926786963011 | 283.21175871127  |
| MTDH    | 126.682296930289 | 205.121208974511 | 122.258194040815 | 209.794541970107 |
|         | 206.649471678786 | 132.985150338484 | 259.855509977658 | 98.8478655411492 |
|         | 174.021676013865 | 145.509901200987 | 129.091447141381 | 169.459466601559 |
| MTE     | 84.2728210732532 | 52.1062000766427 | 55.5567699051046 | 187.802182308625 |
|         | 109.14984236229  | 179.342338803631 | 85.5027511448958 | 75.2101993995344 |
|         | 65.644767142472  | 66.7299966077909 | 58.5588286084726 | 72.6182747525443 |
| MTERF   | 55.6268253440479 | 50.1520209533747 | 48.0654860391912 | 55.8709511400674 |
|         | 52.8843091010101 | 50.7516773099639 | 45.9635923776719 | 50.3344433595166 |
|         | 51.2423106372758 | 54.9460876400605 | 53.9250184542719 | 55.0474662429609 |
| MTERFD1 | 293.040690378216 | 276.084235934753 | 178.858202962948 |                  |
|         | 144.290966198687 | 573.394745674984 | 204.862161704394 | 219.34503297115  |
|         | 145.526972410673 | 190.854807132673 | 123.784915105564 | 137.239944506217 |
|         | 226.970981973829 |                  |                  |                  |
| MTERFD2 | 52.8427643366617 | 45.3486182278177 | 52.9111155236961 |                  |
|         | 62.8201270538435 | 42.9090346219023 | 45.3882138838137 | 53.1884505015411 |

53.3094843669564 42.992884918158 61.6670071424359 56.5402453093703  
 54.8630527326985  
 MTERFD3 41.6354649482853 41.2262949117288 40.301483914446  
 41.6564075217517 42.1386542162789 42.7107928951766 37.3799542961839  
 41.1575777497576 39.6609238036815 42.785429206422 39.4410515050885  
 42.57175366709  
 MTF1 106.878946016737 92.0002934041687 102.150058925164 166.608353896248  
 119.572497267498 115.861269747317 95.6697427870979 147.017279035061  
 86.6910280940418 119.301672388541 134.40110873422 104.26046498068  
 MTF2 102.044838876428 76.093116738739 69.5937318502259 82.0292880742189  
 67.1278109419819 65.564930068976 98.8657527308305 117.215323339475  
 68.4229528414965 74.1228645930185 85.5839487225537 74.5886835786452  
 MTFMT 70.6065558064758 98.5746416750459 67.4280399954084 59.198088069573  
 88.6838633595745 69.4820178305563 83.457269041228 58.0892402609917  
 71.5836731059913 66.3481553496766 62.6885730386156 87.6598268114592  
 MTFR1 178.400810392873 374.978401470437 175.271140689255 109.310200749289  
 128.146059846414 126.753713093485 160.117375210168 144.609635554528  
 224.14182624489 118.854313907627 108.512469038407 168.67163443217  
 MTG1 53.1309801459151 72.3297091475814 88.1797799963114 51.5913529948887  
 81.7765447802116 49.641159251878 99.3797043236938 79.8264217848103  
 73.8800799416166 66.0786923699684 71.751972433516 59.5875857071693  
 MTHFD1 72.3388488936832 61.6878176260761 80.531334073336  
 78.9479233685889 89.9284109077375 81.3978207813439 86.3237770387663  
 68.1311562787361 98.8595497262968 55.1089864632456 64.0541263553251  
 68.7753456118815  
 MTHFD1L 276.666571115104 215.68113524702 164.780216383719  
 167.49597550111 345.811673759417 125.642081865992 150.562062400737  
 153.643631245787 201.427008153788 76.8998454389745 70.0402992940342  
 125.92333271598  
 MTHFD2 183.086707591185 118.862494537893 107.637618676176  
 359.628703006773 190.548265163011 194.716672574835 187.238252376588  
 175.909221705119 200.082941320005 55.6296597598368 70.4732736918246  
 107.192370576332  
 MTHFD2L 60.6441065119394 63.6287257620165 68.3234331335073  
 81.2269477373795 44.8897737954573 83.5274372175811 46.0228732507872  
 60.2691630545162 55.9423752286714 83.0700092537618 67.1477341610979  
 65.3585701203568  
 MTHFR 58.9201382292404 58.9128486419884 53.4743535852344 80.7168944828052  
 61.6452971581503 77.9085946827079 46.4388841354122 59.3164315859919  
 50.9010149857308 55.9283039581662 45.8180710486329 54.8630527326985  
 MTHFS 164.941191767024 150.262748333939 103.14577985944 363.947777340854  
 129.096406048173 171.058650956601 152.426698798326 144.684130072542  
 133.947490654701 169.18132209076 136.644759501653 154.166621635012  
 MTHFSD 73.9986015964321 82.904037973319 93.7782490229256  
 75.9099205260748 75.0665411373616 69.1523164481201 92.8579489575841  
 48.6441988290952 65.2125527940945 69.5080454202415 80.3500323413132  
 63.6254894053045  
 MTIF2 135.693805158061 107.654589391726 153.595112580363 146.483908799607  
 115.970093171058 118.259459346012 120.850874262069 159.324902145777  
 141.261334415286 107.055174400714 97.5534379346899 118.745729915256  
 MTIF3 126.682296930289 161.092366817598 153.028210322286 138.053682842992  
 108.815245119101 161.7095047889 138.23147386089 147.704325041249  
 163.766548456924 134.869029698594 132.518188482163 190.375732394043



|        |                  |                  |                  |                  |
|--------|------------------|------------------|------------------|------------------|
| MTL5   | 43.0001432913058 | 43.3458769998118 | 42.8270038153139 | 38.6835649080278 |
|        | 49.5666074434383 | 39.132725377815  | 50.911342328268  | 50.2391482329046 |
|        | 44.293922970134  | 41.0608773166058 | 41.0476065156912 | 40.2669497398702 |
| MTM    | 44.5282181324797 | 37.8217989841918 | 39.9101908547397 | 40.646702696033  |
|        | 43.2484996523549 | 36.2015763253919 | 44.0687697278114 | 40.1474543172332 |
|        | 40.0403898620771 | 35.8304004211528 | 34.8383995317036 | 40.0557788909923 |
| MTM1   | 69.9431447778061 | 81.909815795953  | 84.3755392205436 | 110.666686474986 |
|        | 63.3638417360105 | 96.034706957068  | 68.878562323012  | 60.9009676344258 |
|        | 69.5741225986433 | 58.9836017745712 | 72.909783842776  | 75.9136854087044 |
| MTMR1  | 47.1962846565261 | 43.7644428186265 | 48.7039705048129 | 43.2504382247503 |
|        | 50.8373208590626 | 42.5660695551615 | 46.1634822993009 | 51.6660481331154 |
|        | 43.1805016690297 | 45.2556760873335 | 48.7078937513299 | 45.1296099011771 |
| MTMR10 | 68.3799828461475 | 74.3239491140189 | 69.4047473173218 |                  |
|        | 65.084620579901  | 86.9543262608386 | 77.6115604215716 | 66.2892779596928 |
|        | 57.445796273665  | 73.0403099404    | 112.919063481867 | 93.955760127914  |
|        | 109.851796671234 |                  |                  |                  |
| MTMR11 | 97.0254711947754 | 79.9567256807679 | 163.877163712385 |                  |
|        | 96.6957892186886 | 68.9766943946607 | 107.309776354951 | 82.1892276444554 |
|        | 70.0697974278875 | 82.6157566292355 | 163.048439401341 | 123.480244775709 |
|        | 120.02765867291  |                  |                  |                  |
| MTMR12 | 53.4921736109774 | 60.5571721986885 | 59.8273072817267 |                  |
|        | 67.8978240198575 | 54.2301964914419 | 96.6957892186886 | 87.0685571351947 |
|        | 49.9332280449549 | 64.3425836997629 | 43.401782064778  | 48.9754340235127 |
|        | 52.9609836781499 |                  |                  |                  |
| MTMR14 | 130.533514998688 | 162.513675180449 | 149.747000657513 |                  |
|        | 217.848539722853 | 134.17280153232  | 124.002268940785 | 149.249181701692 |
|        | 206.234676343851 | 125.044670102036 | 144.02257553612  | 107.101455915625 |
|        | 94.004826321484  |                  |                  |                  |
| MTMR15 | 89.3989848564067 | 112.146987452306 | 83.1874704625702 |                  |
|        | 76.6232527679845 | 122.316617618658 | 126.128760255542 | 98.8657527308305 |
|        | 65.813547096222  | 105.796515736125 | 134.152059562322 | 129.236597599908 |
|        | 130.524308471577 |                  |                  |                  |
| MTMR2  | 57.2008272301399 | 64.7650773032999 | 59.4431489877328 | 59.897987870592  |
|        | 65.9098543816057 | 67.4256666294142 | 87.3213916666808 | 60.6706478075023 |
|        | 68.9038222450855 | 69.3599873705996 | 62.6601624592906 | 68.6788460999238 |
| MTMR3  | 107.034189847828 | 98.2280780221631 | 87.8505898087072 | 129.005213737493 |
|        | 79.7102196041395 | 75.6382797289563 | 115.643361390258 | 127.345094323724 |
|        | 112.261145599693 | 132.555169949054 | 112.211717641877 | 116.264725467875 |
| MTMR4  | 153.61084474789  | 119.362992523422 | 145.711534348895 | 126.485649460666 |
|        | 172.451522479253 | 133.514641336669 | 150.242221910229 | 205.24499293304  |
|        | 152.441506175141 | 124.56803502087  | 125.752132815786 | 106.356074933606 |
| MTMR6  | 69.7442393277127 | 76.3228890963999 | 77.9085946827079 | 139.385367339095 |
|        | 75.3580625318157 | 103.955842514553 | 93.3897477314201 | 78.1448136847078 |
|        | 80.8728961146267 | 118.726647822102 | 102.610376474754 | 124.628895737993 |
| MTMR7  | 38.385865183581  | 39.8695929627783 | 33.553634633839  | 39.9697332660833 |
|        | 40.148780650831  | 37.1317006162938 | 38.7337086062875 | 47.8947595316832 |
|        | 37.10170285405   | 36.0481934423077 | 43.0971787292711 | 37.4554876386402 |
| MTMR8  | 38.3418933808844 | 39.4537536502114 | 40.0557788909923 | 39.3455642782085 |
|        | 36.8442943492616 | 40.7616966228404 | 40.0052661202207 | 38.956280281655  |
|        | 37.241386734757  | 39.3999056968598 | 39.153226699662  | 38.6454098044474 |
| MTMR9  | 111.397578350396 | 106.443777149496 | 131.413578749264 | 146.719419166639 |
|        | 79.5175547131776 | 190.570409327756 | 72.8653205184014 | 78.1448136847078 |
|        | 79.2129308982479 | 152.880772824839 | 167.05554959607  | 149.118265845458 |

|        |                  |                  |                  |                  |
|--------|------------------|------------------|------------------|------------------|
| MTNR1A | 41.2424637338424 | 37.6383530120621 | 43.7630587657205 |                  |
|        | 48.665578118898  | 43.1252272136667 | 50.7516773099639 | 48.9826868640753 |
|        | 41.3506832276112 | 42.4540072551568 | 46.0119912782855 | 38.5668610487033 |
|        | 42.9887069977696 |                  |                  |                  |
| MTNR1B | 40.2543341073001 | 39.7835513496873 | 37.7384958256497 |                  |
|        | 43.3078542962968 | 40.8873907150245 | 34.9849896310235 | 46.5650556481721 |
|        | 42.5435283762933 | 36.8127605061228 | 41.7405682794166 | 45.7328341667151 |
|        | 39.0536056496869 |                  |                  |                  |
| MTO1   | 75.5751205142867 | 96.038271786159  | 100.616027485975 | 97.5849495690144 |
|        | 93.2630594602634 | 126.389908470189 | 95.7639712596394 | 60.1258784595219 |
|        | 80.1505160355175 | 87.8868373144081 | 91.6826894933058 | 114.78317743597  |
| MTP18  | 195.654315886452 | 110.036754099036 | 81.0295607064541 | 135.604088792552 |
|        | 108.512469038407 | 54.2503023961401 | 264.451310132096 | 156.08027400493  |
|        | 328.46798329618  | 100.168016285684 | 81.1999893051533 | 129.965747812294 |
| MTPN   | 580.444451816014 | 534.629009719855 | 536.290060852815 | 689.738256133922 |
|        | 444.169882251299 | 466.454993547103 | 408.865817081303 | 516.076634990003 |
|        | 709.730555484551 | 714.990611155096 | 610.853753376105 | 636.367246129079 |
| MTR    | 66.4399491500833 | 56.3560498705517 | 54.1637401903523 | 68.0471049167726 |
|        | 76.7820250461545 | 85.1544284060549 | 71.3527183280827 | 80.1144023887293 |
|        | 54.2825877218965 | 93.2226507128199 | 79.8701900696361 | 106.020559220488 |
| MTRF1  | 50.8388984085636 | 52.3187919317561 | 53.4088637045445 | 43.5627649099623 |
|        | 48.0234896130991 | 39.6251842352088 | 42.7431359850339 | 42.0494116081998 |
|        | 54.7033747046992 | 51.1169368198437 | 52.3187919317561 | 43.2776458914333 |
| MTRF1L | 142.03031230486  | 130.455608913636 | 124.890309370032 |                  |
|        | 150.801729138762 | 149.24022100428  | 182.757684959879 | 127.148417780972 |
|        | 120.850874262069 | 92.8206287414481 | 152.467040827584 | 137.395516155158 |
|        | 150.31039735991  |                  |                  |                  |
| MTRR   | 90.1056480599534 | 75.9099205260748 | 69.11736279512   | 88.5907320965949 |
|        | 58.8281931439093 | 115.321592104747 | 69.779139490544  | 71.3868929454853 |
|        | 61.2108152457954 | 71.1163541406788 | 66.1541420734416 | 108.798055356072 |
| MTSS1  | 160.777879976503 | 299.428590398636 | 325.909358171616 | 140.41738844565  |
|        | 151.255948388415 | 172.929453277107 | 204.370291548631 | 115.052948380817 |
|        | 225.35760689842  | 299.094486437911 | 212.062417120966 | 177.236964110663 |
| MTPP   | 35.1307934330047 | 41.8848959280916 | 39.3709357615493 | 40.0698728584484 |
|        | 38.9496515344837 | 36.4986986135769 | 38.0598374201407 | 43.4544762830742 |
|        | 38.9834959368496 | 44.0409178714232 | 43.844855336215  | 43.8575940017119 |
| MTUS1  | 49.6798204496926 | 46.1215010989701 | 66.4079972657486 | 45.3914421744692 |
|        | 54.2834600746761 | 77.1900613562529 | 46.4992822713138 | 44.293922970134  |
|        | 51.9294387732035 | 54.2356999525029 | 61.6510502615429 | 69.1605201046373 |
| MTX1   | 244.678323059428 | 137.843308428621 | 201.941251308732 | 187.982920458868 |
|        | 287.932410610182 | 140.393549614927 | 265.320447667174 | 217.189489936251 |
|        | 157.161381086926 | 127.437627356956 | 130.832511095219 | 122.642481894309 |
| MTX2   | 137.016387648703 | 212.062417120966 | 236.374695859748 | 124.051109959228 |
|        | 264.071486075874 | 135.169625016001 | 182.188883821722 | 167.352766082239 |
|        | 214.127390534906 | 210.605371352247 | 210.200786815048 | 299.74710723735  |
| MTX3   | 82.4263339218052 | 87.4623442823265 | 98.4136818894883 | 83.2925226467532 |
|        | 99.1438953564062 | 105.945216149549 | 79.1432909353319 | 71.2867274976738 |
|        | 118.410983614453 | 143.443713592074 | 131.555833438345 | 128.776189744323 |
| MUC1   | 1683.24873205783 | 173.780433758335 | 977.776395810338 | 108.868692628326 |
|        | 434.841521967958 | 132.364260893831 | 741.908952472992 | 826.490051619826 |
|        | 1506.33570635551 | 111.056599389048 | 124.738024302128 | 327.024556075244 |
| MUC12  | 46.263826584899  | 44.066785003302  | 44.9758339877851 | 47.8947595316832 |
|        | 41.6806984441849 | 46.3203995372658 | 47.4439407315335 | 43.7731874801003 |
|        | 44.0256815382334 | 38.6454098044474 | 44.2527566343661 | 44.4475838947656 |

|        |                  |                  |                  |                  |
|--------|------------------|------------------|------------------|------------------|
| MUC13  | 43.0001432913058 | 29.5408011993809 | 34.6977013306396 | 43.8002456102021 |
|        | 35.5220586859301 | 31.8228237796461 | 37.9430145836712 | 33.4534810696886 |
|        | 40.3316153483289 | 34.2638875325204 | 41.5421429082231 | 38.5279745308203 |
| MUC15  | 39.5676051939342 | 38.8336427948187 | 37.3687900733549 | 34.4382958501338 |
|        | 34.0045980663271 | 41.7627910693483 | 45.6042625176633 | 46.0633179231318 |
|        | 42.357910063876  | 41.3321861371202 | 44.4688999098904 | 41.1554481567603 |
| MUC16  | 426.622204035624 | 49.5443425465542 | 40.6737160001291 | 46.1673159982664 |
|        | 42.1650127805175 | 38.4330755397458 | 42.629412460409  | 40.3357777530419 |
|        | 42.992884918158  | 43.2988017098387 | 38.079222289614  | 45.5800840647989 |
| MUC17  | 38.5007204246293 | 38.8336427948187 | 42.157627240486  | 38.8495095797881 |
|        | 37.8679241954337 | 42.9695585740813 | 37.4772922422734 | 42.8482181313226 |
|        | 43.4656637536244 | 40.8970401536578 | 45.0589947942306 | 36.9976231206067 |
| MUC2   | 40.7609952437622 | 86.9709077763908 | 49.7350276169552 | 32.4383992781552 |
|        | 50.5110359971301 | 40.650742261428  | 31.5556621809114 | 39.9576138799997 |
|        | 57.4777075615651 | 42.785429206422  | 40.4504608195666 | 39.9519547348106 |
| MUC20  | 316.917793468502 | 155.492099076744 | 70.2577825186943 | 67.474556589181  |
|        | 137.551493752877 | 56.0477607422828 | 294.443061798191 | 188.943404504867 |
|        | 547.729200972776 | 168.7696164772   | 126.079949368634 | 144.250839367023 |
| MUC3B  | 45.5758521267508 | 45.8980298854198 | 43.917817324545  | 41.6045220683604 |
|        | 44.7829632472754 | 44.9370339275041 | 43.5627649099623 | 43.9366081640576 |
|        | 45.7873395324682 | 41.4659679379482 | 44.7926323492519 | 42.6278608611758 |
| MUC4   | 48.7078937513299 | 42.0443173541853 | 39.991353369336  | 39.243700710881  |
|        | 41.6348975104828 | 38.4330755397458 | 40.7463231537027 | 49.8344973836834 |
|        | 41.5332509791429 | 42.6391690899113 | 40.232531099586  | 39.3575468494941 |
| MUC5AC | 69.0975200641705 | 41.554942319225  | 38.0452862258803 |                  |
|        | 43.4410741327254 | 57.1935729219207 | 43.5752393599169 | 41.9393838138203 |
|        | 42.357910063876  | 46.6944238390932 | 44.0409178714232 | 37.9946685306274 |
|        | 44.4475838947656 |                  |                  |                  |
| MUC5B  | 43.0930293831497 | 37.3634897565502 | 41.8751578329365 | 43.9282059368202 |
|        | 41.6806984441849 | 39.7394181011603 | 40.9157352260901 | 41.5464765641928 |
|        | 39.3750969348308 | 43.9450023643394 | 42.4580504587581 | 45.8546719310325 |
| MUC6   | 43.1805016690297 | 46.6619317885811 | 46.5113110023498 | 43.2657550877972 |
|        | 43.7858612339862 | 41.2202950824622 | 44.5368031163323 | 44.1554086873888 |
|        | 44.3780249232864 | 45.7911932481722 | 43.1785624103807 | 45.9001080829252 |
| MUC7   | 36.4564050256915 | 32.4552405279874 | 36.4564050256915 | 34.3595588146954 |
|        | 33.3231576795423 | 34.0777108441756 | 32.8745892439217 | 36.1375121409002 |
|        | 33.8558232866797 | 38.957687788868  | 33.0553208959996 | 37.2810767789306 |
| MUCDHL | 40.9558083259517 | 36.6002100641539 | 38.7745734037492 |                  |
|        | 45.4634652319753 | 49.1928206164702 | 42.9695585740813 | 42.0605906240248 |
|        | 42.7431359850339 | 42.7150227340364 | 44.8997235283254 | 44.1148826235374 |
|        | 42.9887069977696 |                  |                  |                  |
| MUCL1  | 41.6354649482853 | 50.9643363406241 | 64.408176016319  | 163.718576695806 |
|        | 57.2960245538881 | 49.641159251878  | 42.0605906240248 | 41.1575777497576 |
|        | 46.581796165231  | 40.2112371512838 | 37.8372168909583 | 41.3481355128089 |
| MUM1   | 387.039093527273 | 232.320396482547 | 314.819739055632 | 207.087723777954 |
|        | 375.757961593064 | 242.966185793816 | 112.60230393988  | 226.553946570328 |
|        | 189.245501343165 | 295.69493803986  | 370.330147221688 | 199.501451042641 |
| MUM1L1 | 47.4678477186801 | 41.7337506166619 | 39.0775870687758 |                  |
|        | 43.4410741327254 | 46.0977687311222 | 40.7616966228404 | 65.1041577962151 |
|        | 97.9497090233081 | 64.5347406608537 | 57.7805922926828 | 57.6831182451733 |
|        | 47.6938628797168 |                  |                  |                  |
| MUPCDH | 38.7537364570873 | 38.0226905622357 | 39.991353369336  |                  |
|        | 43.3078542962968 | 37.293529903672  | 40.4753617660107 | 42.1157692936428 |

|        |                  |                  |                  |                  |
|--------|------------------|------------------|------------------|------------------|
|        | 38.1835938174625 | 40.8970401536578 | 39.5637454855233 | 39.5792604499113 |
|        | 39.4490233720848 |                  |                  |                  |
| MURC   | 58.9201382292404 | 60.7495043977707 | 61.5824518349507 | 55.6481366056639 |
|        | 55.1563703466328 | 50.4022543872993 | 55.2088411137193 | 49.2901038327894 |
|        | 54.113533179847  | 67.1278109419819 | 58.7389869173495 | 53.0446815750355 |
| MUS81  | 92.843017373656  | 109.654559065946 | 93.310557793228  | 91.1834104205004 |
|        | 114.674541610026 | 103.242926669137 | 135.866407965991 | 114.719721626067 |
|        | 101.2825552085   | 151.175959542368 | 116.993403211005 | 118.115557136662 |
| MUSK   | 111.041991642022 | 81.0331497830643 | 85.1981126713031 | 116.852483297949 |
|        | 65.8319449883221 | 97.8052968915826 | 91.2330127140591 | 77.7615826856723 |
|        | 95.8734933265537 | 77.9085946827079 | 70.0402992940342 | 81.1189042503645 |
| MUSTN1 | 44.7915315085948 | 54.6089451252049 | 46.8267540220952 |                  |
|        | 54.1240583139871 | 53.5594683028749 | 93.5045354990096 | 51.1541843174981 |
|        | 50.5070012045444 | 41.863927676552  | 125.588228083829 | 92.3388129097482 |
|        | 72.1090339831747 |                  |                  |                  |
| MUT    | 85.1950626054282 | 96.1181720777683 | 84.7222416138393 | 107.637618676176 |
|        | 90.9521112485099 | 142.309369995384 | 108.337776546183 | 100.370937669662 |
|        | 89.5597629049747 | 83.247335725921  | 108.779357041421 | 109.017269529278 |
| MUTED  | 101.28981910937  | 76.3228890963999 | 83.3826639718546 | 70.2541961995753 |
|        | 121.552188287725 | 89.2185019250322 | 67.0455170947389 | 71.2867274976738 |
|        | 110.860844149372 | 105.923542213588 | 86.9985064472533 | 114.972374827795 |
| MUTYH  | 82.8485522398913 | 93.3718038663074 | 90.4160198134865 | 64.8336014343435 |
|        | 87.8967913380047 | 72.3070624532091 | 119.124583755587 | 98.3733183587283 |
|        | 112.613079254002 | 100.586064920239 | 92.2095095678497 | 104.232196493024 |
| MVD    | 82.291097567232  | 84.9182861692273 | 114.979124960177 | 104.335120306753 |
|        | 87.3957386451235 | 80.8333046859586 | 132.090336898032 | 86.0944261788554 |
|        | 193.380035526465 | 82.6036671634626 | 100.45351084408  | 89.737418965763  |
| MVK    | 76.1417635449123 | 73.3950348855139 | 74.0913177754682 | 65.7321440516177 |
|        | 88.5564369981649 | 55.8243694410835 | 74.2690269784394 | 60.419911425109  |
|        | 161.890859629246 | 80.943990104641  | 83.9236799134394 | 59.0894921452893 |
| MVP    | 490.652353306749 | 354.015808474189 | 646.013007560085 | 488.649780652311 |
|        | 162.000275136397 | 327.729165976539 | 168.145003400654 | 356.948763043851 |
|        | 224.914980996667 | 243.15571937138  | 386.640440174303 | 411.981987305512 |
| MX1    | 541.105845300009 | 2331.12401106076 | 2934.35616793443 | 1282.9181829891  |
|        | 1545.76489731307 | 922.047328788961 | 3707.73750609316 | 2575.86919902296 |
|        | 1163.0370991733  | 1604.80031304031 | 1163.0370991733  | 757.833254346899 |
| MX2    | 132.541333041312 | 478.682734715193 | 577.993850127555 | 568.371815312895 |
|        | 533.820505121067 | 164.487183006292 | 439.955651727755 | 656.355333007615 |
|        | 312.245547906683 | 114.321083441061 | 112.565968152932 | 62.2025996860055 |
| MXD1   | 170.150808455621 | 155.492099076744 | 256.302432791187 | 810.201903561366 |
|        | 123.261654256925 | 185.360921731157 | 172.433936159136 | 183.336550845401 |
|        | 133.842824493862 | 105.71315237465  | 83.8637731385607 | 78.8968326770219 |
| MXD3   | 67.2437599548936 | 61.4800543360853 | 89.4111455826308 | 68.1992221684165 |
|        | 68.4323624797175 | 56.8505380943422 | 103.118579484715 | 112.211717641877 |
|        | 92.0711167984454 | 64.6446465846487 | 58.4816190076338 | 62.9904770954043 |
| MXD4   | 393.648308810931 | 794.806085783439 | 583.915973546284 | 370.330147221688 |
|        | 497.290172759099 | 552.162906190653 | 197.540681021755 | 237.100802227545 |
|        | 311.301613620475 | 554.357391794908 | 418.810270137243 | 259.698043923535 |
| MXI1   | 46.5713648171122 | 48.2220547806679 | 40.713858228386  | 42.4162492820012 |
|        | 41.5377280911418 | 50.8999542937724 | 44.1407835440612 | 41.0381860307445 |
|        | 41.9635525160083 | 42.5193208629123 | 42.6366765186182 | 45.2292962534499 |
| MXRA5  | 2257.78227736778 | 185.079035617027 | 388.920739791844 | 612.014486689487 |
|        | 257.761541860837 | 178.44531401852  | 249.451753363306 | 367.56843259639  |
|        | 123.077231445204 | 1254.34397143795 | 1430.73068989193 | 786.57695312967  |

MXRA7 118.980144905852 58.6593748588955 57.3837827230023 64.3117498829777  
65.7196733766698 265.026710493466 55.2088411137193 70.4856977039037  
44.0383630714326 189.650905999631 213.204385896543 193.094756585577  
MXRA8 111.109515944561 51.6060290544385 45.2640606138546 50.7774722329703  
58.174555206394 78.0013795192762 40.9157352260901 47.5950227477807  
37.10170285405 54.1683282066029 52.8297102061403 56.4873776344986  
MYADM 404.175196605897 153.237127853072 165.496075703734 524.047008889711  
171.957278903005 917.179747195874 149.397632479523 404.356143472409  
66.2179612592367 283.30253361072 302.422475486532 419.563859911367  
MYADML 40.3478825593224 36.6002100641539 38.7745734037492  
40.8681871019812 36.3390947880186 37.4782441311626 43.4544762830742  
38.2782436497441 41.6616444147804 37.8217989841918 43.844855336215  
42.57175366709  
MYB 171.974852167092 84.1922656126304 137.831070407907 83.4756142147167  
69.805066579191 65.564930068976 330.391945158969 107.427186954956  
84.4938528830721 59.0630473216622 54.1963147679251 44.3521099857368  
MYBBP1A 58.1027665533767 64.0903425729408 69.7855392178808  
44.7980740332174 75.6471706262645 66.2167164788023 73.8313212063649  
59.220967994972 56.7991853808475 66.0224755625662 73.6362523983338  
58.2251348002272  
MYBL2 35.9305494063137 37.3634897565502 31.0126568324233 40.646702696033  
36.08956004634 40.8634043028528 41.1507980856436 43.7396619462033  
39.4762546236449 38.2069499294002 42.357910063876 45.3763275588341  
MYBPC1 39.0620487644635 223.749512763927 36.6203885854289  
42.8235313007746 39.5357194705749 39.8911783587406 41.3241920742165  
38.4187686307607 43.6039443285137 38.4678643044777 43.9063490244748  
37.6119337673806  
MYBPC2 36.3649677956953 39.7835513496873 37.0642268327439  
41.7614975630362 40.4639532172338 36.4986986135769 41.5817737564592  
43.7396619462033 43.8482802038826 35.0082729554459 39.9899430628542  
39.2469742642337  
MYBPC3 45.8108990837624 39.9697332660833 44.1452943804044  
99.4184778430267 44.3557408297309 43.9724628401189 46.4388841354122  
47.7889447429963 45.2897806651929 42.3606390470387 43.1931731665131  
45.5800840647989  
MYBPH 47.5647821785529 46.4385386401326 40.8420925848403 77.0774476767901  
42.7107928951766 40.8634043028528 41.253645578517 40.6171774724171  
37.2810767789306 42.2614524730856 42.6366765186182 42.9887069977696  
MYBPHL 37.6397652536077 43.5873188565519 36.178547300352  
39.1706564265495 37.4470183315826 34.2773859804062 33.1392460259336  
36.1375121409002 34.1294694030979 38.3092241935352 33.4071187618571  
34.2141875904985  
MYC 131.483899499125 701.935442033195 315.960715273629 177.27613997459  
833.136660528149 999.862452730252 139.414044294473 166.910579215196  
175.165302282522 90.8831233784641 115.962193866339 197.232697438521  
MYCBP 77.0301627655229 50.8114699212931 60.3973027611091 57.2856683017619  
66.4047895961325 53.2046867327331 51.3064929551674 63.287067794195  
165.992057520727 47.2299678280724 47.4630625313159 58.7382738968248  
MYCBP2 84.1254258487497 267.29148042787 193.758357282411  
319.871452890512 171.597378768542 306.294404016622 165.606015336587  
244.498602338731 187.733278812798 216.45007990575 265.367588517131  
254.199076651191  
MYCBPAP 41.4508241771315 41.6466169548846 40.931294690669  
43.8002456102021 45.9104478407175 42.5660695551615 49.2546642180676

|        |                  |                  |                  |                  |
|--------|------------------|------------------|------------------|------------------|
|        | 45.0972184964705 | 47.27543600687   | 49.1928206164702 | 44.553780984244  |
|        | 45.8546719310325 |                  |                  |                  |
| MYCL1  | 57.0575084219334 | 44.069462769215  | 37.9482157381008 | 38.2516470858206 |
|        | 60.2417579280647 | 42.4263859458031 | 51.0572809855463 | 53.6210959113222 |
|        | 47.0027453663546 | 39.8873706855774 | 48.9259041798949 | 44.416113301755  |
| MYCN   | 55.4553297468768 | 81.2992152187529 | 67.4811066936124 | 41.4273122914951 |
|        | 60.7495043977707 | 45.6706505553383 | 903.756866967447 | 385.512974999198 |
|        | 46.824299585607  | 68.9115937148858 | 59.8070012006708 | 54.1440452292081 |
| MYCT1  | 47.3791873993182 | 44.4639405506967 | 54.8133029594319 | 43.1275490164761 |
|        | 43.5836473788312 | 53.1052228246467 | 43.3832826368789 | 43.844855336215  |
|        | 42.38204124321   | 45.0864985243943 | 45.1432412071268 | 46.8840006833906 |
| MYD88  | 150.262748333939 | 263.44529683749  | 203.619260934048 | 449.427251674566 |
|        | 771.961354075412 | 217.658421476562 | 234.615033303459 | 181.705809767061 |
|        | 241.384699095468 | 163.692769575522 | 130.703767898434 | 178.525751043592 |
| MYEF2  | 37.2474303302343 | 34.8137085420423 | 34.1806289878747 | 38.3166554965434 |
|        | 43.5544347011646 | 35.2067831864574 | 39.8695929627783 | 34.3865306339645 |
|        | 32.8704945047196 | 35.7202909649682 | 39.0550139257658 | 37.1747156131306 |
| MYEOV  | 58.1868359012515 | 43.7644428186265 | 43.3085358214154 | 45.4634652319753 |
|        | 45.6895223823001 | 39.4953494583071 | 49.540449125788  | 49.2901038327894 |
|        | 168.737634511775 | 40.3235655331796 | 36.0481934423077 | 40.8681871019812 |
| MYEOV2 | 44.9896851005259 | 44.5152708955623 | 42.3536549114165 |                  |
|        | 43.3078542962968 | 40.148780650831  | 42.157627240486  | 37.0564573649223 |
|        | 36.6452480995946 | 43.5669306063196 | 41.3321861371202 | 44.0409178714232 |
|        | 42.8864415494484 |                  |                  |                  |
| MYF5   | 40.308802735799  | 43.6587492470348 | 41.8389336728199 | 40.646702696033  |
|        | 42.1386542162789 | 37.8102105794655 | 38.2280071951674 | 42.6022652963326 |
|        | 41.8197029429821 | 39.1177164316495 | 40.8681871019812 | 43.7672102682067 |
| MYF6   | 39.9697332660833 | 38.1312950900467 | 42.0621425894624 | 44.0451487108213 |
|        | 40.7273974755431 | 39.1664256481434 | 39.8299340037009 | 39.3709357615493 |
|        | 39.853866204927  | 46.8954576545929 | 39.9586075662602 | 41.3481355128089 |
| MYH1   | 41.5421429082231 | 38.2263227947189 | 38.7745734037492 | 41.2445895434274 |
|        | 39.3667161654772 | 43.7078399718247 | 42.5660695551615 | 40.4359177791566 |
|        | 39.2809305246091 | 42.8414096678708 | 38.0365987358005 | 46.4136802014079 |
| MYH10  | 1073.84987604662 | 614.603743904512 | 469.78210773245  | 270.922452389109 |
|        | 657.310970474676 | 641.103199748891 | 1465.08435775014 | 455.774407260725 |
|        | 246.351606918353 | 586.508419046212 | 459.92905629125  | 452.139416552986 |
| MYH11  | 553.707482409148 | 730.168814097451 | 480.660242705293 | 536.290060852815 |
|        | 393.001025840896 | 10910.7672404363 | 46.3057385979341 | 1019.67015337432 |
|        | 70.7087323885819 | 11795.0477101407 | 11795.0477101407 | 10483.5643876539 |
| MYH13  | 41.3387790895716 | 36.89524015739   | 36.4564050256915 | 37.5382094267692 |
|        | 34.5301949364147 | 44.7804080899431 | 38.6243997507646 | 34.4896350146096 |
|        | 44.4395580493118 | 37.6383530120621 | 38.6662194645633 | 38.5279745308203 |
| MYH14  | 54.8845696432531 | 66.4626619269287 | 50.0050760710506 | 38.6414316877471 |
|        | 46.8086806989607 | 40.3357777530419 | 75.0092868910417 | 83.8637731385607 |
|        | 62.7605715573218 | 95.5156363110528 | 86.0100701849272 | 64.9418945936106 |
| MYH15  | 39.4710743516517 | 46.6996902348633 | 34.1806289878747 | 46.614092935749  |
|        | 39.1650142708257 | 39.2985791324641 | 37.4772922422734 | 41.0381860307445 |
|        | 38.7298222155532 | 42.5664883002833 | 47.6884372645373 | 43.9541718254769 |
| MYH16  | 44.1294459089314 | 39.8695929627783 | 41.4613628725541 | 45.8145523469421 |
|        | 43.0723817756832 | 45.7700386532539 | 42.5660695551615 | 41.7877325563821 |
|        | 41.1349567921107 | 43.2988017098387 | 42.2510526338368 | 42.934549734195  |
| MYH2   | 36.1232327599945 | 39.9697332660833 | 35.7105247506212 | 39.6292788039793 |
|        | 37.1565984182084 | 42.157627240486  | 41.9393838138203 | 37.4484310268909 |
|        | 35.4332080966594 | 48.4890615340603 | 36.5359455830388 | 194.012210675469 |

|         |                  |                  |                  |                  |
|---------|------------------|------------------|------------------|------------------|
| MYH3    | 48.2910530887214 | 47.4076235350059 | 49.6347864008749 | 39.853175885492  |
|         | 47.3172462673426 | 118.745729915256 | 44.8643898647322 | 57.037639245179  |
|         | 45.6582729799009 | 143.278668481091 | 144.227861902786 | 536.290060852815 |
| MYH4    | 52.109723558511  | 62.4530276414691 | 92.3034609409756 | 59.8102324370568 |
|         | 41.5668884168669 | 50.9724155054821 | 56.3376046940285 | 40.5158867964016 |
|         | 46.2027193115397 | 66.8026147385682 | 52.2229654768933 | 68.4278345554565 |
| MYH6    | 44.8914371498528 | 39.6995529770239 | 42.9104454767916 | 52.6947911480086 |
|         | 41.2740822675592 | 39.8455060654531 | 49.8281348927244 | 47.2009420656854 |
|         | 44.2607789091176 | 40.8970401536578 | 41.1638563416981 | 41.4508241771315 |
| MYH7    | 42.442231667357  | 46.8954576545929 | 43.0016969050339 | 46.3203995372658 |
|         | 42.1650127805175 | 39.4953494583071 | 45.3597029614942 | 46.7980335276155 |
|         | 41.7627910693483 | 53.5498255316009 | 45.1432412071268 | 43.3744503319109 |
| MYH7B   | 39.266565827316  | 42.6022652963326 | 38.9790184198145 | 36.5393857306744 |
|         | 41.467005949568  | 34.9849896310235 | 46.0228732507872 | 41.0381860307445 |
|         | 41.9635525160083 | 41.7405682794166 | 37.5583886316038 | 37.9607839934735 |
| MYH8    | 39.266565827316  | 41.8073910693411 | 43.5710871617107 | 40.4359177791566 |
|         | 40.8873907150245 | 40.244271403831  | 42.8684958525042 | 38.4540849632254 |
|         | 36.7267557061938 | 38.1042454705119 | 42.2618615571566 | 42.0424641526302 |
| MYH9    | 2830.73694055758 | 2009.75680599899 | 1876.51621222292 | 1656.16581692717 |
|         | 1143.51046585232 | 1343.66876893729 | 2054.64068255575 | 2559.659041589   |
|         | 1445.73674428909 | 1842.15643221012 | 2039.89728774097 | 1621.89443989657 |
| MYL1    | 38.6454098044474 | 44.9877531846933 | 46.1653991089885 | 40.7481155008596 |
|         | 41.0608773166058 | 45.996661384888  | 40.6301588195752 | 40.3730429236163 |
|         | 41.2397693523949 | 40.7589111641166 | 43.1931731665131 | 38.5814307557439 |
| MYL2    | 37.7726313569706 | 48.2521192538861 | 37.9003288112261 | 43.4877740913713 |
|         | 39.8114752099365 | 42.0016830644258 | 41.8799523546812 | 44.8727287473605 |
|         | 48.2123120250343 | 44.7520317855773 | 41.2267153672559 | 42.7275315121163 |
| MYL3    | 41.4508241771315 | 38.6414316877471 | 42.0621425894624 | 36.6501141438378 |
|         | 38.4540849632254 | 41.4508241771315 | 39.7576136507593 | 40.047314525032  |
|         | 39.6609238036815 | 43.4885245598939 | 49.319499137678  | 47.6040671292013 |
| MYL4    | 45.4507786740825 | 37.4772922422734 | 45.310660704531  | 44.7401523707775 |
|         | 45.5809132232681 | 37.7427315853995 | 40.8681871019812 | 39.7509165247419 |
|         | 42.7671420440641 | 43.0177448037924 | 44.6286581923295 | 36.1190722948669 |
| MYL5    | 98.2512963929558 | 197.13726107504  | 135.706144105357 | 144.427680369554 |
|         | 104.914715637173 | 144.863548409034 | 189.055029582117 | 165.322633260592 |
|         | 110.379403044901 | 192.171116215791 | 188.336316985251 | 125.868437542325 |
| MYL6    | 8703.02873382565 | 5112.4354472796  | 5895.03230740197 | 9709.60940482862 |
|         | 3690.00752647453 | 12456.731302703  | 8050.256095383   | 10910.7672404363 |
|         | 6309.53691418065 | 10483.5643876539 | 9582.11974031559 | 10910.7672404363 |
| MYL6B   | 450.759762047652 | 216.404466544919 | 312.19993077414  | 281.527450183603 |
|         | 360.047596829923 | 529.025813945023 | 619.114937854476 | 364.337811621248 |
|         | 460.865101118125 | 353.598144765197 | 367.931222555457 | 334.90764380842  |
| MYL7    | 45.1912496459517 | 44.4411734611229 | 39.0775870687758 | 36.7892997857376 |
|         | 41.5668884168669 | 39.8455060654531 | 43.0930293831497 | 40.6171774724171 |
|         | 34.7722083264266 | 40.8049408996274 | 42.5426057453993 | 47.3992733452821 |
| MYL9    | 190.403032965372 | 102.962105111048 | 95.6731932757489 | 140.35042464015  |
|         | 91.4121563150184 | 1580.58484708669 | 51.3064929551674 | 86.6586095017998 |
|         | 54.4912806027381 | 1323.73429724066 | 1217.21440297138 | 1027.59400018637 |
| MYLC2PL | 39.3709357615493 | 42.3550738181144 | 39.2707964550441 |                  |
|         | 36.9912468186322 | 38.2496050953547 | 36.0306975524309 | 41.706879587091  |
|         | 39.0620487644635 | 44.7058233759912 | 43.2988017098387 | 44.7926323492519 |
|         | 40.6614700944853 |                  |                  |                  |

|        |                  |                  |                  |                  |
|--------|------------------|------------------|------------------|------------------|
| MYLIP  | 255.986778613019 | 304.718140992378 | 259.033660186329 | 204.774090707986 |
|        | 574.467486140819 | 389.131545459708 | 216.782658096982 | 766.647626178442 |
|        | 300.057362423939 | 196.200780398883 | 286.045253557021 | 185.843333258735 |
| MYLK   | 177.29096218424  | 79.1039287828151 | 63.3936612506971 | 88.0827215704624 |
|        | 66.0411740221276 | 1012.91803181784 | 40.3302268293707 | 86.8463723709337 |
|        | 42.9454180086838 | 359.465715235071 | 349.371668774717 | 462.105603187328 |
| MYLK2  | 36.6480005877129 | 44.2105195734073 | 51.0539624358342 | 55.4180794172794 |
|        | 58.8961770381033 | 40.650742261428  | 46.1634822993009 | 41.7419877611072 |
|        | 37.9273653326866 | 43.2988017098387 | 44.1148826235374 | 33.6902293666089 |
| MYLK3  | 37.7384958256497 | 47.8400694856726 | 38.7745734037492 | 36.5393857306744 |
|        | 37.1565984182084 | 35.0970060242246 | 44.7255207589606 | 39.5466975353131 |
|        | 40.9901805728485 | 38.957687788868  | 40.4504608195666 | 37.5556299264699 |
| MYLPF  | 36.2496364442264 | 39.6123051184545 | 37.4642807402741 | 39.1706564265495 |
|        | 41.6806984441849 | 41.0582900711341 | 41.5817737564592 | 32.7676164492555 |
|        | 37.1820543575123 | 42.785429206422  | 38.6662194645633 | 41.0657892043496 |
| MYNN   | 69.6449298794042 | 70.9970523709176 | 66.0411740221276 | 76.3693529894936 |
|        | 94.9808934532248 | 78.0013795192762 | 76.0041771381018 | 58.7460488758053 |
|        | 63.3999425418402 | 61.8529316708431 | 62.6885730386156 | 69.1743062945144 |
| MYO10  | 86.6655289455628 | 51.9421032049606 | 56.3471340054074 | 49.3654837541353 |
|        | 49.9493230064613 | 48.260931742163  | 60.7992483126292 | 60.5571721986885 |
|        | 65.1424206085551 | 62.2025996860055 | 56.233217375698  | 55.8775622338124 |
| MYO15A | 36.6480005877129 | 41.4508241771315 | 36.769073068743  |                  |
|        | 39.5050383901884 | 40.2449343247539 | 39.0266821712099 | 38.6243997507646 |
|        | 40.1474543172332 | 38.1169703906207 | 38.1042454705119 | 36.2435874904689 |
|        | 34.3409660445447 |                  |                  |                  |
| MYO15B | 39.0620487644635 | 41.554942319225  | 38.1421709520616 |                  |
|        | 36.3604951341921 | 40.9950639693255 | 35.5158505219112 | 32.4466419672036 |
|        | 39.4710743516517 | 37.1820543575123 | 36.1550293353654 | 40.0766543123257 |
|        | 46.2625470410195 |                  |                  |                  |
| MYO16  | 41.0608773166058 | 37.5469247328848 | 35.2838283525874 | 41.4273122914951 |
|        | 37.5556299264699 | 36.8059561571675 | 38.1793598983615 | 41.7419877611072 |
|        | 38.9834959368496 | 43.4885245598939 | 37.9230440150891 | 39.2469742642337 |
| MYO18A | 60.394307846869  | 50.164201758929  | 54.0170817319522 |                  |
|        | 47.1332119496722 | 44.8351976221735 | 51.3886035574416 | 47.9665737016961 |
|        | 58.4200819624972 | 60.4837400912239 | 55.7148182465955 | 56.8436081694537 |
|        | 51.973762640055  |                  |                  |                  |
| MYO18B | 32.0823591288671 | 37.2810767789306 | 42.9104454767916 |                  |
|        | 37.9875302985336 | 38.1644569189523 | 41.2567470068038 | 40.0052661202207 |
|        | 40.047314525032  | 40.7847110517594 | 40.2112371512838 | 39.9070785037411 |
|        | 37.5556299264699 |                  |                  |                  |
| MYO19  | 77.7455757878929 | 53.8499082625091 | 68.9038222450855 | 46.6986977330569 |
|        | 106.641283957692 | 54.5952754712007 | 76.7483302168542 | 64.2690842803282 |
|        | 96.7799695976296 | 53.4700829948668 | 55.421880601441  | 50.5511827666954 |
| MYO1A  | 52.0299937917925 | 45.6533175604486 | 42.7303139017786 | 43.074472921841  |
|        | 54.1225249245036 | 41.8613406887824 | 45.223075311113  | 48.7814131120945 |
|        | 44.8997235283254 | 52.3304586399695 | 45.9104478407175 | 46.4499258373233 |
| MYO1B  | 166.188557509096 | 64.1267046511632 | 76.3583555666815 | 69.2963913574682 |
|        | 85.0852996855365 | 67.132092735265  | 69.7242825662275 | 114.901312275861 |
|        | 78.270329450618  | 71.1607965028029 | 75.5103237141193 | 79.1209792219434 |
| MYO1C  | 92.4896666046729 | 108.39424630351  | 138.23147386089  | 90.0157406552551 |
|        | 86.3458707176254 | 131.238796973323 | 101.250422688816 | 83.757054871222  |
|        | 76.9535968101411 | 140.532496807694 | 132.646267783456 | 134.258351436533 |



|       |                  |                  |                  |                  |
|-------|------------------|------------------|------------------|------------------|
| MYO1D | 182.885934774318 | 204.68542226859  | 282.115786635657 | 173.536155357688 |
|       | 74.5758811681995 | 214.342804055754 | 152.17335005192  | 140.853812988562 |
|       | 245.769212889294 | 215.290701336046 | 199.480636964499 | 204.273912273411 |
| MYO1E | 58.4920021605316 | 47.4076235350059 | 47.2962360458401 | 50.2163892855092 |
|       | 45.8051846088552 | 56.1671440556142 | 43.3262148375525 | 47.8947595316832 |
|       | 56.7991853808475 | 47.2299678280724 | 48.2050207071554 | 56.7711602236706 |
| MYO1F | 57.6913861717513 | 67.3519071522322 | 57.9279989359711 | 251.268123356533 |
|       | 46.8674366115656 | 81.2314452281031 | 71.8466937395628 | 63.1604223919703 |
|       | 41.3803269429468 | 53.4109882045447 | 55.1099824417989 | 48.1627097465883 |
| MYO1G | 110.214922820817 | 126.389908470189 | 100.43365828852  | 483.000434270291 |
|       | 63.5932443357808 | 82.7269382676336 | 93.0538726751588 | 74.6572522248684 |
|       | 47.7086093893038 | 61.0935621637178 | 81.9727730469029 | 56.9379721393904 |
| MYO3A | 37.1485601150873 | 38.5252456306656 | 37.6557714476853 | 35.1451084093692 |
|       | 38.3561682218911 | 42.2577689927563 | 40.1235656101329 | 38.8495095797881 |
|       | 36.9060997041453 | 33.6902293666089 | 36.6298807161755 | 43.4709415392696 |
| MYO3B | 100.007199072224 | 109.23113111292  | 101.935321521672 | 102.430234282331 |
|       | 75.9397606694785 | 62.9688525319822 | 100.205124008648 | 144.684130072542 |
|       | 64.7766649630041 | 137.156113501125 | 118.507569961357 | 115.441414762268 |
| MYO5A | 108.022329297132 | 67.9697948557876 | 71.0340758556049 | 185.395460281034 |
|       | 63.8315840603904 | 100.305262467668 | 117.706922397135 | 225.300736968225 |
|       | 54.7033747046992 | 71.9124897002253 | 54.9765783642973 | 65.7853960266587 |
| MYO5B | 43.3638918705225 | 52.5868047927666 | 44.7255207589606 | 44.4954892619459 |
|       | 40.6723334103791 | 40.5805725503899 | 54.5772630900888 | 53.3577647219133 |
|       | 60.3977304934451 | 52.5522545249206 | 53.5698357689852 | 51.6046415904452 |
| MYO5C | 417.086922265732 | 78.806097512943  | 106.443777149496 | 71.9062462001972 |
|       | 144.412165495719 | 141.364814429951 | 282.646286144563 | 249.195312452368 |
|       | 242.450054864856 | 194.469250918013 | 202.395470754957 | 154.945533851823 |
| MYO6  | 105.914573205761 | 168.11088055793  | 134.271727318694 | 57.8277957325085 |
|       | 61.6452971581503 | 72.149478755262  | 163.62024333166  | 136.332339821167 |
|       | 141.410183156424 | 100.975810139572 | 95.8149149211251 | 128.873145026756 |
| MYO7A | 61.5882375235292 | 52.2501726671381 | 62.0008474085033 | 76.2591822114739 |
|       | 52.8190882379316 | 66.2167164788023 | 52.8496345990125 | 74.7794253940974 |
|       | 43.2761454096265 | 42.2614524730856 | 51.0492389286271 | 42.9887069977696 |
| MYO7B | 45.6517320730042 | 39.3999056968598 | 43.0971787292711 | 52.1201052574162 |
|       | 39.7568367479301 | 42.357910063876  | 36.197424053556  | 39.2672712041774 |
|       | 39.3750969348308 | 36.0481934423077 | 42.6366765186182 | 46.5650556481721 |
| MYO9A | 173.262440365651 | 91.2647023876304 | 116.080897948094 | 162.151812425949 |
|       | 110.214922820817 | 312.648013979436 | 167.352766082239 | 317.892699374852 |
|       | 159.147713331732 | 352.47015903013  | 292.065366215278 | 226.35806628102  |
| MYO9B | 200.144817111902 | 174.537032518715 | 157.677866955988 | 261.138426747953 |
|       | 181.381479219186 | 148.770228614661 | 180.502282381416 | 371.167168940365 |
|       | 149.856848496725 | 158.918242816842 | 169.970634268117 | 137.52864596636  |
| MYOC  | 42.2618615571566 | 44.0409178714232 | 41.8389336728199 | 42.1622837416589 |
|       | 41.1868052124344 | 326.250872625748 | 40.0052661202207 | 38.3684202018524 |
|       | 42.2577689927563 | 96.2385885003071 | 133.040933717958 | 47.1060577218993 |
| MYOCD | 46.7293238583888 | 37.3634897565502 | 44.6032218589199 | 39.066284740632  |
|       | 39.0564222526273 | 64.0985088513857 | 38.0598374201407 | 42.357910063876  |
|       | 41.2870505273664 | 58.3813211109331 | 50.0303076717704 | 54.293880614303  |
| MYOD1 | 43.0001432913058 | 44.9370339275041 | 46.4569566520107 | 44.9370339275041 |
|       | 45.4751076037511 | 46.3715909653832 | 36.634024014558  | 47.0940613507321 |
|       | 41.863927676552  | 44.7958122466628 | 41.0808257270221 | 36.5474283500601 |
| MYOG  | 35.9305494063137 | 36.3110701990588 | 43.6670755115848 | 36.5393857306744 |
|       | 41.5668884168669 | 39.2248354955045 | 33.6696565339534 | 39.1652965788406 |
|       | 39.7537274655115 | 36.0481934423077 | 34.4716904283753 | 36.6603338274678 |

|        |                  |                  |                  |                  |
|--------|------------------|------------------|------------------|------------------|
| MYOHD1 | 41.2424637338424 | 41.7337506166619 | 44.5134109184888 |                  |
|        | 36.6501141438378 | 51.0107745412152 | 48.4758590019384 | 48.4859552186772 |
|        | 48.3590401011623 | 41.6616444147804 | 44.7958122466628 | 39.8184668132023 |
|        | 44.9070250604284 |                  |                  |                  |
| MYOM1  | 62.2150049214174 | 51.524711857679  | 60.0856496605043 | 75.6103053700122 |
|        | 36.9060997041453 | 1164.71243740122 | 44.6032218589199 | 72.121833189378  |
|        | 54.4059109100338 | 567.978225839768 | 565.411298018845 | 350.451704069255 |
| MYOM2  | 40.3478825593224 | 55.5294887653184 | 45.7968648044613 | 63.0153175111747 |
|        | 47.3172462673426 | 90.99086730704   | 42.9803717121865 | 38.2782436497441 |
|        | 39.7537274655115 | 141.830305704504 | 112.805898501551 | 59.6757573886627 |
| MYOM3  | 42.1537476443423 | 43.8495248991589 | 50.2869791217819 | 50.0526763693329 |
|        | 39.4693871570028 | 40.040778349137  | 43.9450023643394 | 38.1835938174625 |
|        | 45.6582729799009 | 42.1622837416589 | 46.972521499515  | 48.3648494350286 |
| MYOT   | 39.266565827316  | 42.6939394537076 | 45.3974838013476 | 43.1847628331565 |
|        | 43.5544347011646 | 148.925503526873 | 41.4742337714895 | 48.4670130605028 |
|        | 41.2870505273664 | 66.9218519793499 | 64.1267046511632 | 53.9431600945419 |
| MYOZ1  | 36.3649677956953 | 42.0709558258414 | 42.0621425894624 | 49.7350276169552 |
|        | 46.7508829977587 | 44.1737502492846 | 49.6872467499977 | 44.293922970134  |
|        | 38.4344387289956 | 39.9948390976317 | 36.5359455830388 | 36.3454320848591 |
| MYOZ2  | 42.0532901689036 | 45.9266745571724 | 38.7745734037492 | 41.5464765641928 |
|        | 48.0234896130991 | 42.750861693377  | 40.5585676679482 | 38.8495095797881 |
|        | 40.7847110517594 | 40.4136535208406 | 37.2892641289258 | 41.9430737035925 |
| MYOZ3  | 54.7786516309154 | 46.5650556481721 | 42.2577689927563 | 41.3027031037343 |
|        | 38.0598374201407 | 61.6219790276408 | 56.3376046940285 | 45.7476095696859 |
|        | 38.1169703906207 | 71.7464249053513 | 69.4877749654481 | 47.1060577218993 |
| MYPN   | 46.441301934328  | 40.5400384479766 | 38.0452862258803 | 35.249124243346  |
|        | 42.0709558258414 | 38.0648056183784 | 38.0598374201407 | 42.9887069977696 |
|        | 42.9020321355927 | 37.5343260962758 | 37.0603443384602 | 41.9430737035925 |
| MYRIP  | 40.5320714850602 | 63.3948709726117 | 42.6920011548175 | 41.948762493127  |
|        | 43.7517118200398 | 42.4034864825901 | 41.1742244762318 | 42.7020359196292 |
|        | 40.2274522635576 | 40.9647597231175 | 46.0513515682555 | 42.2577689927563 |
| MYSM1  | 39.7576136507593 | 41.2598458726002 | 37.9482157381008 | 39.6292788039793 |
|        | 51.6869155634183 | 38.4330755397458 | 37.830876898596  | 41.0381860307445 |
|        | 42.1594905198929 | 38.6454098044474 | 37.0180934800573 | 39.5418280570561 |
| MYST1  | 172.624182951104 | 115.735359157053 | 163.766548456924 | 186.965367827758 |
|        | 213.380798420955 | 139.445008123768 | 110.729504563799 | 195.813431189188 |
|        | 118.155986485411 | 203.353724675525 | 183.469819903584 | 128.230543301378 |
| MYST2  | 45.4799270968969 | 49.1283590719461 | 43.6670755115848 | 48.1662933382789 |
|        | 40.8873907150245 | 47.0027453663546 | 49.8281348927244 | 53.9465584609317 |
|        | 51.1055541075029 | 65.429256309049  | 50.3221380889396 | 45.7562276914441 |
| MYST3  | 470.231929311877 | 388.74199767336  | 243.015896514493 | 386.372142079981 |
|        | 253.072560237983 | 397.154258378193 | 328.46798329618  | 947.656220635965 |
|        | 338.530970447766 | 629.301646370726 | 543.084891192607 | 413.723725202787 |
| MYST4  | 45.4799270968969 | 46.3635803515159 | 60.6567691532561 | 45.0798408927912 |
|        | 43.5544347011646 | 54.0382756991549 | 52.2476631126873 | 43.3262148375525 |
|        | 69.5741225986433 | 54.6089451252049 | 58.5588286084726 | 40.1700117452801 |
| MYT1   | 75.6471706262645 | 204.229798794441 | 47.646800205189  | 41.1886975241176 |
|        | 53.3086645804786 | 42.8598805316863 | 42.357910063876  | 38.079222289614  |
|        | 153.35286239647  | 39.4710743516517 | 36.2435874904689 | 35.5523662009011 |
| MYT1L  | 39.512606833112  | 37.1485601150873 | 38.5045333213784 | 39.5050383901884 |
|        | 41.3277288245157 | 41.809704036355  | 39.3999056968598 | 38.9271399577966 |
|        | 37.8319142847141 | 41.3321861371202 | 42.8742421276144 | 39.9519547348106 |

|          |                  |                  |                  |                  |
|----------|------------------|------------------|------------------|------------------|
| MZF1     | 100.205124008648 | 205.991317474325 | 282.603767561794 | 126.69706456173  |
|          | 252.134800295199 | 122.469733727349 | 140.744765497063 | 140.128033028434 |
|          | 186.395673402867 | 221.015209694864 | 192.470747766298 | 166.931246502269 |
| N-PAC    | 181.266908509671 | 169.276398619323 | 204.63343271995  | 167.966212667288 |
|          | 137.965622805944 | 171.597378768542 | 112.113501370522 | 119.243515595981 |
|          | 150.221698290502 | 220.85458646522  | 257.050603883498 | 194.951677338012 |
| N4BP1    | 84.8569316561572 | 122.849949163123 | 120.850874262069 | 132.425058995617 |
|          | 49.1928206164702 | 63.763257037939  | 76.3583555666815 | 67.1702819938085 |
|          | 61.6839343510302 | 114.796237914478 | 86.9985064472533 | 72.4094549259929 |
| N4BP2    | 205.991317474325 | 149.330073823683 | 169.344094528032 | 400.093769705765 |
|          | 116.951729886784 | 117.598001907902 | 239.466489599238 | 441.247306467645 |
|          | 143.894266185526 | 335.612706052778 | 353.531051185171 | 272.828896268482 |
| N4BP2L1  | 48.2324547902378 | 59.6359245937831 | 65.49167373382   |                  |
|          | 66.6894494536346 | 44.20782151793   | 66.4399491500833 | 52.4793441959524 |
|          | 49.4456171013459 | 49.5265949137207 | 68.2215392821251 | 57.0875538213735 |
|          | 66.1650385535549 |                  |                  |                  |
| N4BP3    | 48.3814421939888 | 34.7135536792489 | 44.696023817801  | 44.4367387274922 |
|          | 41.7929491793697 | 36.0306975524309 | 38.4005795891396 | 39.5466975353131 |
|          | 37.1820543575123 | 45.1569741609597 | 41.6336636285875 | 42.7782216342806 |
| N6AMT1   | 52.1788489555942 | 70.3213394542625 | 107.971806573919 |                  |
|          | 52.8502823653368 | 72.4545316969598 | 55.1037284831588 | 62.0404348860702 |
|          | 54.0507720792049 | 81.2359429678503 | 79.5488891958168 | 85.8277891453447 |
|          | 77.3999378505514 |                  |                  |                  |
| N6AMT2   | 88.9589979655541 | 78.5174639327946 | 76.6914642534934 |                  |
|          | 56.6458456890715 | 86.8871118411414 | 81.6949047529395 | 82.9431583622036 |
|          | 72.121833189378  | 67.5047089908724 | 92.6888475289584 | 104.241389167544 |
|          | 121.149803296368 |                  |                  |                  |
| NAAA     | 82.9322141700549 | 90.6516730646251 | 91.6033269431304 | 147.137598111239 |
|          | 106.599578931817 | 125.891602778425 | 81.6713911430463 | 81.9504925867759 |
|          | 104.462230406058 | 80.4554147910354 | 63.7086622961206 | 74.1686961093736 |
| NAALAD2  | 46.8141313516997 | 38.0226905622357 | 42.9104454767916 |                  |
|          | 41.1886975241176 | 43.004943518025  | 53.2046867327331 | 34.6720534245631 |
|          | 40.047314525032  | 40.5912213523345 | 42.6793753550854 | 48.2050207071554 |
|          | 42.1537476443423 |                  |                  |                  |
| NAALADL1 | 68.5457752893587 | 57.0082102559228 | 49.9256753636167 |                  |
|          | 108.025082988807 | 84.5572894783679 | 109.738537924214 | 63.0119737420787 |
|          | 51.0724630072723 | 42.7150227340364 | 81.0880833950735 | 82.1659654020827 |
|          | 57.445796273665  |                  |                  |                  |
| NAALADL2 | 36.4564050256915 | 36.4002279956519 | 41.785676764591  |                  |
|          | 37.0732977341185 | 37.7576900881741 | 37.9951997351435 | 34.0777108441756 |
|          | 42.157627240486  | 40.2274522635576 | 42.785429206422  | 38.079222289614  |
|          | 46.0633179231318 |                  |                  |                  |
| NAB1     | 128.04037427867  | 112.000099082544 | 124.214669663291 | 164.176142753482 |
|          | 115.132600341395 | 142.444971930298 | 111.367789538268 | 157.082769443568 |
|          | 140.860068375212 | 163.788056447509 | 108.022329297132 | 136.947616119439 |
| NAB2     | 93.3605294458382 | 68.307513091369  | 43.9450023643394 | 61.8997157694697 |
|          | 58.4383854340181 | 67.1729762600915 | 73.4820932957859 | 47.0940613507321 |
|          | 61.7865043876727 | 82.2431666775699 | 87.8967913380047 | 55.6351010690528 |
| NACA     | 2865.25344854768 | 3234.36469403715 | 3854.42494497831 | 2663.19221471348 |
|          | 2611.32405374107 | 3653.59181300011 | 3379.67054115975 | 4503.77675488367 |
|          | 3776.54943917367 | 3502.80810319252 | 3592.44409869527 | 3690.00752647453 |
| NACA2    | 43.4626049853157 | 35.9305494063137 | 37.6557714476853 | 38.8495095797881 |
|          | 33.7494761745342 | 31.9222834447339 | 31.6981395162348 | 41.4508241771315 |
|          | 40.2274522635576 | 46.0119912782855 | 35.3362091871364 | 34.9138625012006 |

|         |                  |                  |                  |                  |
|---------|------------------|------------------|------------------|------------------|
| NACAP1  | 53.6741873729867 | 57.7757446006652 | 66.4079972657486 |                  |
|         | 74.4365426051588 | 60.5290966885203 | 91.9459432547337 | 62.6885730386156 |
|         | 84.7642634532073 | 74.7934385405346 | 66.9218519793499 | 59.6608518093582 |
|         | 88.4439480366515 |                  |                  |                  |
| NADK    | 102.863599315528 | 143.517244617936 | 131.258204302177 | 210.255784687052 |
|         | 118.49449420132  | 131.90520406914  | 136.629336440719 | 135.997802304719 |
|         | 125.027865666372 | 139.814194128548 | 137.016387648703 | 114.396745444915 |
| NADSYN1 | 221.015209694864 | 451.364230598722 | 422.702925141293 |                  |
|         | 177.067668324062 | 218.132527712083 | 134.051011731533 | 354.973265582488 |
|         | 393.464673405634 | 392.237227927376 | 503.187121806288 | 409.724772942357 |
|         | 382.872356030213 |                  |                  |                  |
| NAE1    | 187.836567614419 | 216.744244428166 | 193.758357282411 | 106.582060920252 |
|         | 123.368987753537 | 169.001200403896 | 246.924485443224 | 283.563531065269 |
|         | 206.571946834892 | 99.5958921252583 | 134.152059562322 | 182.06733830953  |
| NAF1    | 56.8168526942685 | 77.9992448636936 | 69.7855392178808 | 73.8480604979804 |
|         | 98.9988668602468 | 66.6320017520888 | 68.2708120569221 | 62.8885806455128 |
|         | 75.4572860692649 | 61.0935621637178 | 59.5830868881343 | 61.7502624458447 |
| NAG     | 92.3659612653822 | 58.5406981871153 | 62.6532574724345 | 79.262977183608  |
|         | 55.4919197421746 | 83.2083460752986 | 113.039124313172 | 113.655306804539 |
|         | 83.8679756709676 | 88.4385631861141 | 85.5175308034109 | 68.6788460999238 |
| NAG18   | 5246.60459228386 | 4427.89837060471 | 5074.07305640514 | 4328.723715755   |
|         | 3761.48462220262 | 2966.53151444114 | 4503.77675488367 | 4986.44888767011 |
|         | 3618.78958408675 | 4858.39551231606 | 4784.36905964712 | 3749.78281766196 |
| NAGA    | 70.083473392272  | 77.1737254584648 | 77.5718089378881 | 80.1809075683154 |
|         | 65.5029051840465 | 63.3612993417558 | 66.6894494536346 | 82.5170409503063 |
|         | 56.5094373275922 | 66.274247400793  | 64.1267046511632 | 59.5875857071693 |
| NAGK    | 602.441843384617 | 513.109067557976 | 481.145001682177 | 798.996494242432 |
|         | 588.854342793207 | 447.709872889701 | 963.224016480187 | 1257.19844370057 |
|         | 367.931222555457 | 738.364399569625 | 633.819901764391 | 453.456591501321 |
| NAGLU   | 99.3956523785983 | 75.0873720488265 | 94.6935403697218 | 104.8505815954   |
|         | 97.6205705034407 | 68.839885767937  | 71.6890300780549 | 80.5508300225954 |
|         | 83.9924889412802 | 88.8568707880669 | 97.712117589297  | 74.5886835786452 |
| NAGPA   | 78.3851687801705 | 100.205124008648 | 227.059460958349 | 138.895316905243 |
|         | 112.506613718654 | 86.503774181307  | 91.6143557472674 | 77.6174893940285 |
|         | 106.590506599473 | 132.341766267192 | 147.719172115976 | 116.547937420457 |
| NAGS    | 42.6036491382658 | 42.3550738181144 | 44.9758339877851 | 36.890925044696  |
|         | 43.9450023643394 | 42.4580504587581 | 46.8613212048981 | 43.2551508830106 |
|         | 43.4656637536244 | 41.1222709786153 | 40.1742127891824 | 44.8372404608604 |
| NAIP    | 43.0462952354436 | 40.6829816382208 | 39.3351022102264 | 55.6481366056639 |
|         | 40.4091351714709 | 43.3785777889265 | 40.7333121467448 | 39.4270866851816 |
|         | 41.7091809278836 | 42.02667925031   | 42.5864346233886 | 41.0276561769647 |
| NALCN   | 46.263826584899  | 43.5873188565519 | 39.2707964550441 | 42.9358255168086 |
|         | 43.5544347011646 | 42.357910063876  | 44.3440839686558 | 47.2009420656854 |
|         | 41.4636047919453 | 38.745552403895  | 43.0016969050339 | 43.4709415392696 |
| NALP5   | 40.148780650831  | 45.2556760873335 | 46.2625470410195 | 53.2046867327331 |
|         | 48.0234896130991 | 46.574682061365  | 44.0687697278114 | 43.4544762830742 |
|         | 38.7298222155532 | 41.4397539024976 | 49.532546810992  | 44.9070250604284 |
| NAMPT   | 91.7437837246405 | 93.2133061608764 | 153.626578526803 | 1068.10627239579 |
|         | 127.21946569933  | 373.802562320876 | 218.701583105141 | 181.545493080363 |
|         | 130.455608913636 | 46.8954576545929 | 56.3516844446941 | 118.20465458754  |
| NANOG   | 44.436995101921  | 34.8137085420423 | 40.1985790927248 | 41.5464765641928 |
|         | 41.8806343997257 | 37.8102105794655 | 36.4098694708483 | 38.1835938174625 |
|         | 40.6957787921451 | 42.2614524730856 | 43.844855336215  | 40.7704587752083 |

NANOS1 38.4344387289956 41.8503210829559 37.9946685306274  
 43.1131704517186 42.7982502551634 35.7034203372528 39.5496902678788  
 41.1575777497576 39.4512099697623 37.5343260962758 38.932557955217  
 41.280186674287  
 NANOS2 34.6977013306396 38.1312950900467 36.2683886571585  
 38.4208429103799 41.5668884168669 40.3357777530419 48.1747307200218  
 40.6171774724171 36.9060997041453 40.3235655331796 40.2649309204478  
 36.1647506311964  
 NANOS3 60.0793579902362 56.1355483199198 62.9313387640547  
 56.2508140932179 132.257197568848 64.5187138759372 83.2162112994735  
 106.58628367621 114.039396407323 54.1683282066029 53.5698357689852  
 58.2879293130296  
 NANP 41.5689645295284 43.7410507935043 39.6451483836089 41.3027031037343  
 57.0006212637829 46.263826584899 49.0441221285767 41.5934628038429  
 40.9460396298042 39.7411455670172 43.6629145624937 44.6001024251011  
 NANS 201.180226922613 93.6717518147993 80.354283778818 152.545682001987  
 121.204795052893 92.1151486847283 125.30588698166 124.324905704041  
 152.250444470971 69.6511571901941 86.582851157193 109.668637140251  
 NAP1L1 110.540953771795 127.160252453685 145.936763882526  
 162.658589763207 162.758841068655 352.339572553069 139.294987640071  
 120.73773749436 178.036507999889 157.856158440506 156.36242271528  
 173.856274004533  
 NAP1L2 43.0462952354436 42.7275315121163 45.4634652319753  
 43.2504382247503 42.1650127805175 49.2871583830897 45.3597029614942  
 46.0633179231318 43.9204029310411 50.4234835272833 49.7149784386993  
 43.5738557773903  
 NAP1L3 49.9419897484381 42.4493032770053 37.1643693306382  
 46.8954576545929 43.5544347011646 67.1729762600915 38.6243997507646  
 40.4359177791566 33.802253812079 54.3554233228353 44.2142581488029  
 42.4607795638552  
 NAP1L4 655.389317052689 1234.59589464045 1204.34388579291  
 691.132727131746 902.691776563423 1078.86166154061 954.116675685628  
 853.947671456736 1630.25992078321 1896.06380611235 1900.96666834569  
 1159.77262479002  
 NAP1L5 69.2322821603564 78.806097512943 108.847044476692  
 70.506090074243 161.180847265279 208.7739716139 60.0981687048269  
 98.2074490157865 64.9030399249327 97.6023731094756 133.781790945099  
 69.51607174053  
 NAP5 39.9139575538126 50.9958345917774 46.5099883995474 41.7217466249678  
 37.1990402348503 37.8102105794655 37.0011886211643 40.1005188910831  
 38.8507804383261 37.3179578037963 38.9087995969091 35.6111578834671  
 NAPA 60.9710783023013 52.8796369426118 46.4569566520107 60.9379216295576  
 56.0477607422828 49.2050538150106 42.9803717121865 56.9299697426319  
 49.8304479381623 59.6863210839828 65.5386366902998 49.0655215909632  
 NAPB 119.853516482249 129.538159906075 214.537530518962 141.423857667761  
 159.324902145777 224.069916407012 154.612425659555 79.3614922672599  
 143.997817398894 382.050584680669 337.084861453686 183.165559564289  
 NAPEPLD 50.2663821500171 50.7119825096136 65.0359415104302  
 42.4061338151892 56.2937283136959 46.6397391251762 42.0605906240248  
 40.5158867964016 53.7442594289333 42.2614524730856 49.6314545328943  
 61.1022920882065  
 NAPG 49.6241203903354 48.109747794187 56.4779645313958 32.6817359372544  
 58.4383854340181 54.9108046955355 62.5506324864207 62.105802634526  
 58.7382738968248 47.611018474151 45.6348103033479 45.5800840647989

|        |                  |                  |                  |                  |
|--------|------------------|------------------|------------------|------------------|
| NAPRT1 | 638.305455110267 | 936.978983469829 | 511.792908607692 |                  |
|        | 222.985386635178 | 449.059703234741 | 202.325629133577 | 457.860665614779 |
|        | 359.889643461047 | 755.852629128252 | 677.481235695517 | 607.042450917813 |
|        | 461.83420090894  |                  |                  |                  |
| NAPSA  | 39.8662795144616 | 52.683711208052  | 44.5134109184888 | 87.114638423256  |
|        | 64.0752803796842 | 53.9517841438975 | 44.3440839686558 | 42.6450179841129 |
|        | 48.8842909466002 | 54.7827221235949 | 53.1505787220552 | 45.8546719310325 |
| NAPSB  | 50.4872122867759 | 112.787082951803 | 66.0979829658877 | 325.839209621021 |
|        | 43.9450023643394 | 78.3488426553071 | 66.1940959364976 | 80.7894026811963 |
|        | 44.1519466943185 | 58.5831897269778 | 53.2083147523758 | 51.6660481331154 |
| NARF   | 525.687522832693 | 355.288272452203 | 330.892010103508 | 346.116601612353 |
|        | 324.582288788326 | 224.827414462257 | 428.729935028911 | 280.402165030951 |
|        | 445.644244692294 | 291.021345839327 | 221.847615564378 | 239.590143292142 |
| NARFL  | 110.609133094021 | 100.483113678344 | 120.96329303892  | 119.833821068193 |
|        | 90.6661301391451 | 106.186051982612 | 127.232160404726 | 92.3532155362085 |
|        | 129.958419679179 | 142.515628954457 | 131.79241580689  | 101.699631771662 |
| NARG1  | 63.1291723738553 | 81.2182827624857 | 74.9113162056974 | 72.89602312859   |
|        | 126.088821850066 | 91.9459432547337 | 94.6952414258466 | 73.8374823243007 |
|        | 97.7114610828769 | 79.262977183608  | 76.8713035584472 | 106.20479137406  |
| NARG1L | 54.1745577382276 | 53.075017853806  | 51.7663108516261 |                  |
|        | 45.6677978788306 | 51.5229124652769 | 50.2163892855092 | 50.4168556990205 |
|        | 47.7535797917441 | 58.1075310818319 | 56.032814067931  | 62.5678755832628 |
|        | 51.7154514744518 |                  |                  |                  |
| NARG2  | 46.7293238583888 | 46.1074305700679 | 43.3523899508716 | 48.7828451916315 |
|        | 53.5594683028749 | 49.9242614590886 | 57.2008272301399 | 48.9826868640753 |
|        | 48.4869909888679 | 47.6773473969653 | 45.6677978788306 | 47.6040671292013 |
| NARS   | 371.167168940365 | 527.238018264393 | 489.232537791775 | 512.255695437272 |
|        | 335.330937634207 | 487.540800793233 | 381.6928205836   | 302.50850157207  |
|        | 710.579735673002 | 770.715044136717 | 567.978225839768 | 624.097858948785 |
| NARS2  | 96.0236731791095 | 104.824641162138 | 95.6731932757489 | 72.2577390063259 |
|        | 126.492854172749 | 95.3300728806601 | 125.752132815786 | 115.827601697699 |
|        | 120.679433440203 | 96.8240908274121 | 104.528976428975 | 127.239392811099 |
| NASP   | 86.9816932158186 | 56.463481075522  | 54.6051538001037 | 53.593974682612  |
|        | 60.7495043977707 | 59.5979861826984 | 109.294124176508 | 58.4200819624972 |
|        | 87.3815040456105 | 57.2231446406982 | 57.5430365699386 | 58.47356854625   |
| NAT1   | 54.6015942073097 | 45.6875030164879 | 52.4834245594261 | 45.5163397926116 |
|        | 52.6454596579693 | 43.9421822132391 | 50.9246396457383 | 47.3226997815962 |
|        | 51.2378476933237 | 44.7672565800508 | 45.7328341667151 | 48.1002535934643 |
| NAT10  | 290.535354193244 | 452.969595001684 | 421.279008280368 | 255.087214364926 |
|        | 899.223276238109 | 360.523229691604 | 488.908231529696 | 824.946988188872 |
|        | 583.915973546284 | 405.852280880924 | 552.480471244789 | 391.658764737446 |
| NAT11  | 52.6960621424156 | 50.2696827764943 | 52.3432130135266 | 53.593974682612  |
|        | 65.6824363141962 | 40.3357777530419 | 68.2708120569221 | 54.720204938924  |
|        | 45.1899271235974 | 52.4351670989268 | 53.6334631215581 | 48.1627097465883 |
| NAT12  | 51.6558970571712 | 46.8236022402545 | 42.157627240486  | 43.6726153508978 |
|        | 44.0451487108213 | 49.3172204533818 | 42.1607322031054 | 48.272324215504  |
|        | 48.3954967265007 | 43.6033221838149 | 47.8284278211109 | 56.1136936405786 |
| NAT13  | 48.2910530887214 | 61.4800543360853 | 52.9111155236961 | 51.0175677516029 |
|        | 71.0593419018503 | 49.641159251878  | 59.5205055437765 | 52.6960621424156 |
|        | 67.646351770712  | 52.2256177934134 | 59.501103909345  | 55.3563533836982 |
| NAT14  | 122.203872796773 | 88.0720840588632 | 65.0359415104302 | 88.7703546775492 |
|        | 114.230358276599 | 77.2834482217973 | 102.294142438313 | 113.655306804539 |
|        | 68.1674425673171 | 91.2715671868725 | 73.0247140074919 | 66.0224755625662 |

|        |                  |                  |                  |                  |
|--------|------------------|------------------|------------------|------------------|
| NAT15  | 47.4678477186801 | 72.4325984501758 | 80.0183739952818 | 56.7927450229377 |
|        | 48.1473938886239 | 71.1607965028029 | 58.3675164086197 | 42.0494116081998 |
|        | 75.2337946941103 | 73.6240672213673 | 64.830448408529  | 52.6922486991742 |
| NAT2   | 47.8249696958403 | 40.5400384479766 | 40.931294690669  | 37.5382094267692 |
|        | 38.9496515344837 | 44.0804700754786 | 41.706879587091  | 42.2577689927563 |
|        | 30.493888765264  | 41.0057887014368 | 35.5179217192467 | 36.1647506311964 |
| NAT5   | 348.65230953701  | 471.297503316471 | 579.038638774301 | 510.232992765054 |
|        | 851.813216452015 | 471.59454368268  | 590.709061039001 | 375.697071471585 |
|        | 501.817654561915 | 388.132295362791 | 379.933650669101 | 607.042450917813 |
| NAT6   | 71.4276813927272 | 66.6479153633977 | 80.531334073336  | 75.7666827480067 |
|        | 96.0418367475772 | 77.7481370715949 | 98.403191200835  | 86.3237770387663 |
|        | 78.7182388025668 | 123.095695502815 | 88.5511408870489 | 69.1099722732115 |
| NAT8   | 40.2543341073001 | 42.9358255168086 | 47.2962360458401 | 44.1483976313959 |
|        | 41.6806984441849 | 39.9397419279057 | 37.7136011474903 | 43.1567024035183 |
|        | 44.0519245668737 | 40.8970401536578 | 40.8225507267584 | 45.7562276914441 |
| NAT8B  | 45.7356815244513 | 50.6774883370457 | 119.124583755587 | 50.7046706880325 |
|        | 49.452985143568  | 44.4619248757502 | 46.3057385979341 | 84.2434917159728 |
|        | 44.8003345643334 | 55.4037482627222 | 53.8260140375214 | 45.1735152121056 |
| NAT9   | 111.760213205992 | 159.204751627727 | 166.33117014492  | 121.104663867264 |
|        | 270.89711217076  | 130.249044369793 | 157.095926797414 | 158.386539883294 |
|        | 162.287617963536 | 152.585423208022 | 158.507361831174 | 123.114162330406 |
| NAV1   | 150.031554835542 | 67.6169355376864 | 66.9239565096247 | 76.6232527679845 |
|        | 68.9766943946607 | 138.12608134713  | 63.5738862549306 | 72.4834467838798 |
|        | 54.7966692984192 | 76.1382217104599 | 82.3364971911816 | 75.0873720488265 |
| NAV2   | 129.434864701718 | 123.039116845742 | 60.8635925649592 | 79.7937658787441 |
|        | 51.392860749191  | 79.8878785326568 | 115.087963545095 | 118.854313907627 |
|        | 90.9521112485099 | 76.7791768896805 | 75.3075812535743 | 68.6518463768502 |
| NAV3   | 46.9939712192224 | 42.3550738181144 | 42.0621425894624 | 37.4223289687135 |
|        | 45.6895223823001 | 54.8265655909623 | 37.830876898596  | 40.931294690669  |
|        | 44.619512785899  | 58.9069025298754 | 48.8088340735921 | 63.9371474698484 |
| NBEA   | 43.0462952354436 | 40.931294690669  | 34.9849896310235 | 38.5707420487455 |
|        | 48.2748123114598 | 59.1223319112238 | 37.0564573649223 | 37.0390589468421 |
|        | 72.1090339831747 | 56.1242927171626 | 56.4567728276775 | 49.3087627580849 |
| NBEAL1 | 38.5007204246293 | 44.2105195734073 | 47.2055133646385 |                  |
|        | 45.8844325913247 | 45.8051846088552 | 43.1826328292558 | 43.9450023643394 |
|        | 40.6171774724171 | 40.8970401536578 | 41.3321861371202 | 37.8372168909583 |
|        | 46.8129509799753 |                  |                  |                  |
| NBEAL2 | 91.6826894933058 | 178.323615832679 | 175.441884261362 |                  |
|        | 152.146012870339 | 155.59062961332  | 83.0554837248934 | 101.065203693106 |
|        | 155.564141715819 | 98.5609311953771 | 130.35828139117  | 129.653830303132 |
|        | 111.267350659923 |                  |                  |                  |
| NBL1   | 3776.54943917367 | 1257.19844370057 | 700.243981336466 | 562.531738167208 |
|        | 805.309720893073 | 2272.91548405176 | 535.585999498708 | 517.440530573161 |
|        | 869.879392791086 | 1202.11455437028 | 1521.20630233299 | 991.630429625437 |
| NBN    | 143.973063517706 | 181.772001042799 | 103.961956810572 | 194.827750623463 |
|        | 156.276838862671 | 119.558756877523 | 121.300283654541 | 80.6200293361016 |
|        | 208.097209050425 | 83.7103049167257 | 99.406307365363  | 100.465129764507 |
| NBPF1  | 44.7915315085948 | 46.8236022402545 | 49.0701538857974 | 41.8142298636348 |
|        | 53.0899789270318 | 53.0522444523824 | 45.5463472121211 | 41.8726674133821 |
|        | 48.267960165858  | 44.0758104763398 | 43.6970744917446 | 47.0130468198828 |
| NBPF10 | 71.8394138241546 | 92.4781449270918 | 123.784915105564 |                  |
|        | 175.114727506747 | 103.792424865682 | 115.519896726673 | 109.192770642308 |
|        | 104.822963389102 | 64.5875183163009 | 80.191847692094  | 75.2681695276057 |
|        | 83.3617516092961 |                  |                  |                  |

NBPF11 242.83357283464 213.285274542564 255.598083334598  
 281.840536529928 239.385229462309 229.47693624489 168.798543634965  
 274.887090359131 195.221917652149 356.318517117856 254.066741436612  
 217.848539722853  
 NBPF12 42.3433931248155 39.6123051184545 43.401782064778  
 43.5627649099623 34.4570158133896 43.5752393599169 46.0228732507872  
 44.293922970134 41.5635499110307 38.1042454705119 39.0550139257658  
 44.0451487108213  
 NBPF14 53.6334631215581 64.7650773032999 65.5495324730507  
 66.3558126170575 76.6914642534934 63.499841172847 53.6294062560285  
 56.2441895183416 56.1172088979505 52.8928296360463 57.2008272301399  
 51.9085809948666  
 NBPF15 43.6434576713809 41.6466169548846 40.047314525032  
 43.006072841282 42.442231667357 44.7058233759912 39.7576136507593  
 43.3262148375525 40.7493885015617 43.7303813515864 40.2330489360997  
 42.6758568421347  
 NBPF20 253.333114749013 315.186937216422 486.044304392285  
 911.661341702443 282.764445883135 343.304521604977 498.284928805673  
 832.181997440212 132.799542377892 481.145001682177 554.551745559065  
 388.580556899321  
 NBPF3 59.9682734755814 57.3227387460214 65.0774755750423 55.1109784383525  
 68.4598819169598 57.3286965007828 55.7341433378734 69.660507090829  
 62.8408273986904 73.5834042105313 60.6505672212119 59.2628513357357  
 NBPF4 44.6231541342 39.5050383901884 34.8956628705329 34.6468794865286  
 43.844855336215 34.3887641786747 35.9058393060637 39.3709357615493  
 35.1155486926999 36.2435874904689 39.6403089864678 31.8554734753953  
 NBPF5 41.6354649482853 38.9338521051669 39.1799070031819 35.9521941716188  
 38.3561682218911 37.9951997351435 40.2154497375715 35.7973685350741  
 41.074824727477 40.5090849993014 36.6298807161755 38.6454098044474  
 NBPF7 40.3478825593224 44.7829632472754 45.2313723727673 44.0451487108213  
 40.2449343247539 43.9724628401189 38.1793598983615 44.4031868028216  
 39.0775870687758 38.3092241935352 43.844855336215 39.8497227447888  
 NBPF9 48.4459451445651 47.7267190613906 44.7829632472754 45.1086872001572  
 42.269054475455 45.5779686360641 44.3440839686558 40.8833572570383  
 43.423558862426 43.844855336215 42.6676654052656 45.6692241948108  
 NBR1 40.7609952437622 39.8369676404424 43.6080766584829 38.6744044898083  
 43.004943518025 40.8634043028528 38.6591482441783 36.075550657169  
 41.5635499110307 41.5709491638291 39.0550139257658 40.1179210534118  
 NBR2 39.5676051939342 48.8584917918986 56.3471340054074 41.3027031037343  
 43.7517118200398 46.574682061365 46.3057385979341 40.2382908228517  
 48.8067321016961 39.8873706855774 41.5421429082231 42.8864415494484  
 NCALD 137.52864596636 68.1780382173625 65.49167373382 85.5959901987745  
 119.015431849218 372.758184542037 82.5344501505114 93.4980947651211  
 195.146655512672 171.501864800548 238.205365476671 112.830467116678  
 NCAM1 42.8638014565441 39.3565586789274 39.4710743516517 41.9643281609107  
 43.004943518025 78.270329450618 42.629412460409 40.188873541274  
 40.0753122697556 46.5001921041783 52.3761286517985 49.2731519807085  
 NCAM2 46.8141313516997 40.4359177791566 43.6670755115848 36.7892997857376  
 38.8456942580061 44.1737502492846 44.3440839686558 43.5544347011646  
 39.3750969348308 42.2614524730856 39.9899430628542 40.9683275553869  
 NCAN 50.4872122867759 46.0713306971594 43.0971787292711 43.5627649099623  
 41.467005949568 46.1513019317765 51.7714254834195 40.831207953647  
 44.5303781239209 52.5522545249206 45.8180710486329 48.8670821164567



NCAPD2 109.889322825648 214.774035015293 172.479002170227  
 103.139459009593 247.843927763772 101.272774711455 261.023196824723  
 155.252915611651 196.355909140782 92.0862930476852 90.807818984128  
 121.354667375673  
 NCAPD3 96.3232257371077 111.880226272362 87.3634135323569  
 65.3191216270241 165.72797054597 65.6914955077809 118.089250727398  
 91.6777754418002 111.643323610073 61.9882398986333 65.088713927995  
 61.8529316708431  
 NCAPG 107.325456368022 95.1423940686828 78.450972383987 63.7909104347097  
 105.589475270494 51.702461863489 159.176229924883 98.4405692451144  
 154.370850473737 39.6719190054379 38.5668610487033 38.745552403895  
 NCAPG2 81.9258201510475 89.5887648181505 74.4508307047509  
 51.7739270955254 118.638732417836 54.4753345912615 118.736188485344  
 78.0020909283414 139.04252811433 44.2580151149956 47.7535797917441  
 56.9379721393904  
 NCAPH 44.5282181324797 37.3634897565502 38.8775560911841 34.2080003860523  
 31.1733235029813 41.2567470068038 41.3594868055879 39.4710743516517  
 30.1079759183823 41.8613406887824 30.493888765264 29.2731027042641  
 NCAPH2 50.206880585207 49.7827734675743 49.3780606970538  
 46.5578790409334 48.8828611005131 61.0311116373365 59.0457625163577  
 50.1833483241864 53.0798381965427 52.502055890816 53.8033413701278  
 44.9794566665821  
 NCBP1 143.265312025262 132.188774889597 83.0959169307948 112.743602566917  
 163.028918580618 80.5478617156852 153.643631245787 152.679927202674  
 136.272019225585 138.895316905243 106.340844838265 107.440379066528  
 NCBP2 114.755820699611 150.529917336161 137.034037711549 96.4278951689874  
 211.109957714241 165.160683489444 128.157032116902 126.14245679817  
 114.657635596229 97.7620313090597 111.256949641793 189.083059081845  
 NCDN 46.4760131160091 46.7591817286632 50.7712194930085 48.5905518770847  
 58.1027665533767 48.3259681735371 42.7982502551634 55.1647896765236  
 50.0227121175766 55.2828387400799 57.3385421837183 49.904979214379  
 NCF1 80.7462144785541 112.542326463419 81.0295607064541 368.318359434313  
 59.3611824459962 137.034037711549 120.582525405708 46.8954576545929  
 39.5806465938526 39.9948390976317 40.723990462047 46.8129509799753  
 NCF1B 40.3478825593224 39.0102066700839 36.9795961564828 61.3747706295648  
 34.3633615460307 38.8336427948187 39.6535880152834 41.8417024632349  
 36.7267557061938 36.8059561571675 31.3983249770297 36.7762265039864  
 NCF1C 77.1900613562529 88.7235007297899 56.1434024065079 325.839209621021  
 50.3713170502557 112.23915619297 91.3607028449916 63.9851732498913  
 41.9635525160083 47.1001757441025 48.2050207071554 48.7814131120945  
 NCF2 38.1169703906207 39.1982470626863 37.6557714476853 116.547937420457  
 40.5710637884029 47.7556758818053 37.6036146841933 38.3684202018524  
 35.3227485563945 44.1379638573455 38.4689132737495 37.4554876386402  
 NCF4 77.8130233266962 92.0606634977068 68.2485577757544 295.917955889194  
 52.1201052574162 119.866221751572 88.9928368134295 83.2873728545705  
 45.1582526167046 50.0173461659833 49.532546810992 59.2849754108299  
 NCK1 252.170412162149 179.378838766172 247.905335219826 326.500804513133  
 326.500804513133 273.849703944739 147.321968565095 155.392743674792  
 247.074756460224 193.830224000034 175.271140689255 340.370474635434  
 NCK2 181.873969432903 176.624023915568 122.531570028682 120.582525405708  
 174.815922224726 139.445008123768 163.718576695806 212.92335057985  
 129.592927998658 174.752830194939 186.64040927334 145.459578481501  
 NCKAP1 133.911556922212 191.394143505573 171.104201731733  
 83.2240772671045 188.887559923238 270.78959225422 101.375030043104

84.607833108004 165.141030604713 89.8660321621128 99.0647786948132  
 224.173852018278  
 NCKAP1L 42.1537476443423 50.7487159427973 47.2962360458401  
 113.979504140326 38.0598374201407 49.7458652239071 44.2166118829877  
 51.2623287419357 34.6720534245631 39.0648733099061 43.6629145624937  
 46.6397391251762  
 NCKIPSD 61.2130609867477 48.6184776976167 55.9459886217809  
 46.1673159982664 67.0738693349694 58.7404123614695 66.7750249658122  
 41.2551966132486 72.3515874601288 51.0055825931636 53.9918882088235  
 50.656598108034  
 NCL 591.192020333181 555.356799014777 484.567462838523 393.556480397634  
 910.898566308567 693.056793637199 575.863848923457 556.572994352617  
 598.686989781235 438.681666410245 512.255695437272 512.255695437272  
 NCOA1 123.00053659939 91.5258329186709 97.9497090233081 146.858315797845  
 87.3085516526362 167.848222139162 185.618644212826 283.30253361072  
 129.434864701718 184.087380444203 153.736638194572 139.847976281228  
 NCOA2 42.6036491382658 54.4793574349739 48.0191002461099 45.7397504535169  
 41.0885562160946 50.2163892855092 47.2927436772465 39.5466975353131  
 52.7512110769042 41.8613406887824 44.1148826235374 56.1875519519366  
 NCOA3 148.403272698474 149.747000657513 152.76005226611 118.67727980117  
 116.362441774156 98.6108785181637 132.364260893831 204.229798794441  
 240.431987635418 255.483653108786 170.082014272945 199.007437365676  
 NCOA4 1956.75875151802 1806.22468459769 3818.71752181269 3070.83113612925  
 1698.18614771363 2113.73880184695 2039.89728774097 1303.33517942343  
 1401.46625360427 3296.66056024983 2096.51999792183 2013.08489754172  
 NCOA5 236.374695859748 183.431582521592 142.172292334093 145.936763882526  
 209.581180285499 165.751590932267 177.535502927617 187.560170529807  
 202.081933301612 254.920345078558 218.446312290024 151.111664091983  
 NCOA6 231.085533860683 264.071486075874 247.416016413788 166.608353896248  
 317.835330028579 188.912691033518 293.755623192857 274.493399403322  
 382.425576479893 284.105466865264 301.728842562175 246.965844426351  
 NCOA6IP 62.928986708012 64.7650773032999 52.9111155236961  
 51.5913529948887 63.25187762908 48.4758590019384 71.3527183280827  
 41.5464765641928 71.1894129030602 65.5349012839562 50.2203578628217  
 54.293880614303  
 NCOA7 1039.06999658544 603.737787922337 314.458148321064 401.56876565547  
 251.854446030066 607.042450917813 478.799250340246 704.601607617837  
 226.767370335792 237.919765197094 301.257549182222 513.266895252699  
 NCOR1 67.8774399765179 110.334176022265 107.501868837432 70.0402992940342  
 77.2608629053098 98.7446830481164 82.1144251872199 76.7710944291287  
 71.2787833369055 76.7137782332689 90.3114947219972 105.589475270494  
 NCOR2 533.468347491982 244.837105178705 282.840679491909 412.880824530845  
 212.353676518748 345.876877384089 242.966185793816 236.10027586633  
 447.709872889701 326.70962514228 330.892010103508 247.298165265093  
 NCR1 34.8099089553046 39.1982470626863 37.6557714476853 33.9645433044281  
 37.7576900881741 43.2805590023412 35.8227939208521 36.5393857306744  
 35.4332080966594 36.9102644736882 35.3362091871364 38.745552403895  
 NCR2 47.8249696958403 44.7829632472754 33.553634633839 39.7411455670172  
 41.6806984441849 37.1317006162938 39.0458123429605 40.931294690669  
 39.853866204927 41.4397539024976 42.8263096141654 44.9070250604284  
 NCR3 41.4508241771315 47.6229101519945 42.640829914102 61.3747706295648  
 44.5668141895992 45.9266745571724 55.8019623191927 43.2551508830106  
 39.3750969348308 38.4187686307607 35.860430241131 44.8372404608604

NCRNA00153 43.9309845324767 41.8848959280916 45.7968648044613  
 38.6414316877471 41.6806984441849 48.7781962164988 44.3440839686558  
 43.1567024035183 38.7298222155532 66.1851600557127 59.6608518093582  
 53.9431600945419  
 NCSTN 1234.59589464045 1045.20336057833 2013.08489754172 955.088515235485  
 1135.43644148537 643.491217668415 817.631505579476 721.266942608349  
 2405.8635632802 1184.75786736273 1027.59400018637 779.333013700435  
 NDC80 56.6951078698291 65.084620579901 52.8041782638549 48.1662933382789  
 75.4652763126449 49.5424425850549 78.4937314423253 71.9771425105735  
 88.7605288058249 44.2580151149956 37.2892641289258 40.3691324547049  
 NDE1 136.155022329495 130.720191554964 196.760671234837 141.319488024794  
 103.356071080819 94.8884063433735 132.090336898032 146.426853713038  
 145.363725698076 101.075733475972 163.66696652324 104.860298453006  
 NDEL1 397.850286751468 553.707482409148 572.19538884395 760.745188431719  
 401.347734852083 639.391575249793 542.901822331329 427.972184856393  
 309.593721653575 426.276230164353 552.162906190653 427.818758455214  
 NDFIP1 81.537796828766 66.8693882433359 82.4615433148846  
 78.0020909283414 61.1216330559316 119.808125185521 66.8475050031365  
 72.8378863017531 86.2563919366781 101.138003125297 106.654782265295  
 123.689895848613  
 NDFIP2 260.010554284184 993.626865290891 871.238169066998  
 217.293240552946 700.477686061791 213.140641182603 572.667024472672  
 344.737170118121 632.019639546131 775.931494648677 738.66912772732  
 858.228943026906  
 NDN 361.158558609751 193.364522980854 121.300283654541 357.254500791202  
 197.660480001139 799.803676957263 80.6634117492762 205.672652429972  
 51.9545473262296 736.846933148564 692.630044242985 478.566247444176  
 NDNL2 41.9407041937973 43.8495248991589 39.3709357615493 47.8164193292842  
 38.8456942580061 44.6524308640784 38.7337086062875 42.2577689927563  
 43.0930293831497 40.2112371512838 37.4642807402741 45.6692241948108  
 NDOR1 34.5886782974123 36.7976562409506 41.437237454134 37.4223289687135  
 37.0526522140242 39.8455060654531 35.2163900400329 36.3405039629059  
 35.860430241131 37.8217989841918 39.8184668132023 35.6427313468066  
 NDP 83.7215159198897 46.6996902348633 54.9944485073259 178.675242612997  
 50.2163892855092 47.0027453663546 44.6032218589199 40.047314525032  
 52.3579564953125 100.638737800637 81.2249082772437 59.987045425047  
 NDRG1 1007.03747721563 772.368030410394 605.338871441599 392.409679550956  
 381.198152331624 393.209708455013 281.688688268815 238.819980744789  
 1377.24483375075 380.736562250846 286.758099833009 536.73426937255  
 NDRG2 114.483475728117 296.664472126617 261.326713935356 92.5391033814713  
 324.223368470876 345.084002073846 276.550265506988 635.050535522135  
 185.563590013028 236.595286890677 263.21493129287 159.588684603267  
 NDRG3 100.489477730896 114.876346000655 114.136234102574 76.7137782332689  
 116.099186392258 122.599723509633 129.143252341926 99.9896394343368  
 127.115038236278 125.588228083829 129.143252341926 152.132756414024  
 NDRG4 50.0466349801009 61.1745030100746 55.4057622584684 54.1892600262225  
 60.7103211409901 51.1081003576577 90.385018479478 86.4898752526885  
 67.6767845246581 134.681893127045 78.4962825977573 122.720768249799  
 NDST1 96.4971762611189 62.6984594468418 75.651446553407 81.8727530460686  
 82.5344501505114 73.3506594385504 55.0897019602305 58.2043532960091  
 54.7033747046992 55.6069214673486 52.3761286517985 61.9882398986333  
 NDST2 147.875578127733 133.626390404589 161.38599012777 198.729330487352  
 129.820909990346 178.44531401852 108.945545005203 83.5767232665142  
 266.702252514277 169.527304857688 146.483908799607 99.8754776648876

NDST3 40.0557788909923 39.2907645923217 46.3411353377615 46.0228732507872  
43.6587492470348 43.8582747295766 41.4742337714895 40.3357777530419  
41.4636047919453 41.0057887014368 41.0050831223107 40.3691324547049  
NDST4 39.266565827316 42.3550738181144 38.5045333213784 45.0798408927912  
41.2740822675592 41.6590564937735 42.2577689927563 42.0494116081998  
40.4997186069494 42.0621425894624 35.9563099719284 40.6614700944853  
NDUFA1 1900.96666834569 1607.73526966988 2167.91218703382  
2184.70038900784 2672.94421680196 2300.20602168385 1776.78784112613  
3070.83113612925 4148.07163380544 2002.0536042686 2083.69812106867  
3313.98659031004  
NDUFA10 98.7869013773721 168.737634511775 255.365088438518  
101.867388894697 114.520410790135 172.599587851881 112.362505628749  
169.425386468707 203.82788889213 123.46775722643 118.899737794318  
173.582309251499  
NDUFA11 829.152040996817 1161.71671016964 995.397944432196  
843.882354867791 1582.45600339543 1305.35453202355 1060.64261592822  
950.740991182127 1333.01876209753 974.296760034984 924.316085565917  
824.946988188872  
NDUFA12 489.622327794168 512.691506909762 810.382224368065  
481.905052451245 547.442608452594 787.671342652389 579.795835370595  
416.972264086884 1171.207937488 379.635124632409 436.757445186987  
621.980260052085  
NDUFA13 558.65313710197 543.975237512604 635.906934423716  
746.550225537883 718.414652618295 1007.03747721563 729.342532316666  
769.685677484067 878.863554510943 1077.94530110976 957.682898193927  
841.850722284484  
NDUFA3 716.434968700383 1497.73669971925 1169.14891282789  
977.776395810338 2018.28984520892 1357.41745370754 1093.84714207969  
1297.78424326775 1956.75875151802 991.030769586473 1052.16097214718  
1111.13061382818  
NDUFA4 1850.06063216244 1723.37649434054 1145.59111340228  
1570.45778081591 1756.86714809925 1876.51621222292 1490.1549980903  
1886.05449875658 2032.18819581205 1731.19220270448 1387.28483887704  
2348.48320928245  
NDUFA4L2 250.832808506455 506.173054520807 1652.85734308754  
121.737071786167 197.660480001139 104.059057437473 178.98901256658  
88.9038123445083 275.061444728555 74.1228645930185 84.2960453806012  
55.6351010690528  
NDUFA5 36.7356360093603 36.89524015739 38.6727842796202  
38.8495095797881 32.771863438151 36.1190722948669 37.6036146841933  
36.3405039629059 35.3227485563945 36.3612409063792 36.131485826118  
36.064718696392  
NDUFA7 200.144817111902 341.601353423389 312.015358620043  
275.096637886925 399.410299413602 255.521720396044 324.506136847875  
407.564154455615 228.054565950253 228.054565950253 248.258290059808  
302.885979412198  
NDUFA8 722.862413305704 775.931494648677 443.269396125834  
733.750875664432 798.033975337132 869.879392791086 1159.77262479002  
709.730555484551 727.788854407888 759.566075437072 767.489657259345  
989.0602710707  
NDUFA9 530.145843878824 489.42739398838 553.707482409148  
371.513106715598 377.679662622526 355.92328557644 587.385368995676  
601.139894733857 812.386878774445 448.787414220553 468.477585169219  
355.92328557644

NDUFAB1 810.021622878441 1401.46625360427 1190.10462185567  
813.242005949542 1073.84987604662 868.899376368472 1176.37732422904  
1413.36279821142 915.102542160713 632.577797921655 727.788854407888  
882.105892529265  
NDUFAF1 79.3539393480885 63.5932443357808 75.9174504780598  
89.9284109077375 112.60230393988 91.2681347227088 53.0277416531043  
79.1039287828151 106.165518810891 62.5036823572932 63.9617548533553  
108.750364850147  
NDUFAF2 254.425072964926 280.490447179545 302.79352975792  
321.454824353597 384.080719411412 588.736435715365 295.848968688724  
240.887877769007 347.196922795214 286.11425202743 242.396401163598  
483.416873464931  
NDUFB1 45.6517320730042 41.2598458726002 53.6837370963602  
53.593974682612 52.4370718282084 52.1024135605001 46.0228732507872  
46.7980335276155 49.3780606970538 46.325232414659 43.6629145624937  
47.1060577218993  
NDUFB10 380.4099232546 467.351570171652 716.754656773542  
467.884559162462 388.661268904002 560.954913956997 441.397616937015  
374.662462104111 587.88126282119 689.738256133922 609.797179957996  
436.627613548713  
NDUFB11 887.118866402149 1211.8832855325 1102.03940742413  
787.671342652389 1129.19103016599 981.039763059681 2036.72286752819  
1037.51323185348 1835.21901524331 1009.47177197543 1067.08316477623  
910.898566308567  
NDUFB2 1129.19103016599 864.302844775203 1094.91235708087  
1043.26325848938 1224.80240464583 1171.207937488 1062.93431683428  
889.638287212686 1470.84169670955 844.431085166353 794.806085783439  
1311.88650141004  
NDUFB3 646.323419285676 521.546082699431 806.827205415602  
751.150916058018 810.382224368065 576.001941308305 472.159979716705  
898.114119553014 963.224016480187 471.874412428677 470.676006277762  
975.544591158047  
NDUFB4 38.957687788868 42.1372626664516 42.108130037421  
41.8778873678551 40.3021896270845 42.8598805316863 36.8369172900902  
39.853866204927 43.7078399718247 39.3698811593364 41.9083581529276  
41.0657892043496  
NDUFB5 915.936211119242 1118.62223628039 1375.14388134842  
1122.44489338159 1575.71609894038 1141.25078954012 1086.12171444149  
1078.86166154061 1119.61164710566 927.61341837276 999.862452730252  
1440.41726370246  
NDUFB6 338.053116855608 274.887090359131 202.627009037401  
372.473625569296 267.359645500185 453.652548085387 445.016226732679  
287.363928615517 253.980053738171 203.092045210928 245.439289067575  
399.410299413602  
NDUFB7 923.470702344816 852.769974690777 926.61614755153  
934.48498309932 1453.77801653969 1194.10154988793 1040.102982885  
1052.16097214718 1232.7632290973 1219.52011418558 1119.61164710566  
917.179747195874  
NDUFB8 1279.02702402372 1975.28674300761 2448.64580552439  
1928.53890809223 1801.44003951248 2755.23573327276 1842.15643221012  
1879.12037123353 1796.47241860175 3143.97163345458 3329.68037676265  
2865.25344854768  
NDUFC1 150.985239447761 288.869882644391 210.485586903711  
173.343091136741 225.201522281399 261.826480747537 273.231509963261

202.872083191114 287.121456559795 188.692678542986 200.698372627272  
263.832968124343  
NDUFC2 42.9104454767916 49.2050538150106 35.2101597814352  
40.5484717678957 49.452985143568 37.5887129572848 41.9393838138203  
42.4580504587581 42.992884918158 42.5664883002833 41.1638563416981  
44.0451487108213  
NDUFS1 54.931538325692 55.0897019602305 50.8303921211581  
50.7046706880325 69.493532577364 63.5738862549306 43.5627649099623  
45.3872406432794 52.2631308081333 50.0564735608363 52.2759825608835  
51.5741598315033  
NDUFS2 65.0721641331632 55.6323803479191 63.3544794716167  
50.2163892855092 43.7517118200398 59.1570467228834 57.1070449050465  
50.3972033014227 122.405413080836 58.6439719071099 49.6706535876636  
48.0350549043063  
NDUFS3 547.072513229674 957.682898193927 853.464809072841  
724.881002237334 966.803172864162 876.959744461441 751.953794043451  
752.837247653926 1127.96214301065 1110.39060103557 982.428740433235  
797.019657306322  
NDUFS4 356.948763043851 644.733901442573 446.37035118289  
376.453560620912 317.186419919708 781.923984640049 254.756894822368  
340.20879802231 681.474524031866 342.223067809915 390.647843814517  
773.781266760336  
NDUFS5 2568.97574985073 1455.64106630257 1810.67209360676  
850.205634919459 2951.88559311416 2266.34088015654 1294.42501356365  
3653.59181300011 9326.9018948838 1411.12613289991 1252.94510628089  
1932.2647526188  
NDUFS6 45.2875173643252 41.554942319225 40.7620472083159  
45.1944222548351 44.7829632472754 42.357910063876 38.4005795891396  
41.4508241771315 38.7298222155532 41.9666541498638 38.745552403895  
38.5279745308203  
NDUFS7 501.148339791372 601.611039798626 745.219025960188  
579.482255191456 1261.91478863258 647.868022835702 663.904584382358  
874.419252731128 1141.25078954012 880.992328229414 905.76958446454  
605.338871441599  
NDUFS8 1231.77360353254 1176.37732422904 1585.90718459092  
965.530928317269 2313.21212353993 1119.61164710566 1917.90025587049  
1689.77066894108 2009.75680599899 1557.42399344934 1999.21832626916  
1303.33517942343  
NDUFV1 470.676006277762 733.358170858378 721.266942608349  
441.090368426661 999.13039066242 626.390544175817 1050.05355467301  
727.181489302632 736.626341475753 687.862452802453 875.139073253298  
548.601467852543  
NDUFV2 1280.77934331703 1411.12613289991 1017.1803754111  
1186.06822787922 780.966123176259 913.704049709264 1372.51401036753  
1055.69506483576 1169.14891282789 934.48498309932 854.712488657987  
825.558929673308  
NDUFV3 49.085741080241 50.0642388903563 63.8558858499025  
46.3203995372658 57.1935729219207 63.2343637481705 48.3411413510851  
49.9951674107458 69.4383198054368 49.5265949137207 54.7061116419212  
51.9085809948666  
NEB 44.9896851005259 40.9731067463382 40.0998167098057 43.4410741327254  
39.9697332660833 36.4986986135769 50.0088611244948 53.9465584609317  
44.7058233759912 36.8059561571675 43.401782064778 38.9496515344837

NEBL 43.9477262001082 39.4569929845912 39.2707964550441 41.3027031037343  
 35.4912783535826 36.2768299545794 42.551356054931 42.6450179841129  
 56.6848620589031 42.0217776707284 38.9087995969091 47.4685398161036  
 NECAB1 40.148780650831 42.1607322031054 41.1367478979484  
 36.1562979552173 41.3755760434934 75.1674447943072 54.339958888486  
 50.3972033014227 47.7086093893038 49.3000844711116 47.2134341420411  
 41.7575097298927  
 NECAB2 50.4872122867759 43.9421822132391 41.6079958749402  
 46.8954576545929 43.9450023643394 44.5544727111028 43.4544762830742  
 43.4544762830742 46.1101825640108 49.1928206164702 44.7926323492519  
 42.57175366709  
 NECAB3 60.9710783023013 56.9312835667828 68.6095266659765  
 50.7046706880325 88.2427413480277 57.3797835448761 65.1041577962151  
 56.8094693588238 63.5195937348531 80.6634117492762 70.6138659908885  
 55.1804535845496  
 NECAP1 236.727577348109 343.346644539158 312.648013979436  
 651.621028098039 278.140612054333 229.745018977185 268.047342640491  
 268.936151471133 266.702252514277 237.919765197094 268.144525192544  
 275.975192937951  
 NECAP2 404.674869177442 414.293172794592 428.206419080492  
 456.874884453965 368.660803187338 291.486402879057 436.216696884703  
 407.161973433666 359.628703006773 397.108901822735 343.990395610093  
 334.170764774986  
 NEDD1 46.3884811643547 57.7155177133893 52.5799250974039 43.6726153508978  
 49.0145368354835 56.796621176582 58.9656737189764 48.1182514902212  
 68.4229528414965 42.4393920571519 47.6388115824631 46.7182294568603  
 NEDD4 51.6558970571712 52.8041782638549 48.0191002461099 57.5666238219027  
 58.3675164086197 66.5500089527674 50.4430599873056 48.1591264215184  
 56.1404433602127 57.2813205536176 55.736748491876 65.8959431201418  
 NEDD4L 86.4195039096886 153.797431763616 128.219615202232  
 64.6945454069792 66.3075095149783 135.829530518199 209.251334289712  
 138.170787392253 140.51841571801 606.481020597082 469.893430869091  
 294.048088688381  
 NEDD8 2167.91218703382 1372.51401036753 1575.71609894038 1473.52943897204  
 1497.73669971925 1566.12726152736 1393.24135330226 1450.53108586858  
 1707.92349760322 1738.00955642263 1465.08435775014 1783.87583818834  
 NEDD9 118.664567031144 60.7000614972772 58.2986825661503 101.250422688816  
 117.439175394651 74.2237084854031 89.815123920749 123.281175151414  
 84.0899854321388 73.6679006272617 65.9056396615997 76.9603875266956  
 NEFH 39.9697332660833 38.6414316877471 36.8730514568925 47.3574589211166  
 43.4544762830742 39.4953494583071 37.6036146841933 71.7336217321663  
 32.6039814489621 49.3000844711116 48.2050207071554 42.57175366709  
 NEFL 41.3387790895716 40.7952353240579 39.991353369336 44.6905691366696  
 42.9090346219023 33.7818132446042 35.0305278582179 41.7419877611072  
 39.6609238036815 39.0648733099061 38.8507804383261 41.9430737035925  
 NEFM 42.2455707947223 49.4982025424177 41.0356368374708 40.5484717678957  
 40.4639532172338 39.8455060654531 58.5087296620514 50.5070012045444  
 41.1742244762318 45.5776159432079 63.664265793911 51.7833333848627  
 NEGR1 41.1523487516364 39.6123051184545 43.5710871617107 40.8681871019812  
 44.6834648302383 45.7300501624017 40.3302268293707 41.9315419791594  
 40.0403898620771 49.3000844711116 40.8225507267584 43.4709415392696  
 NEIL1 51.1055541075029 47.9665737016961 48.8941062980393 51.5913529948887  
 52.4370718282084 46.0364000143537 50.3519150282938 56.1404433602127  
 51.7549258776884 53.5498255316009 44.3763859390287 57.445796273665

|       |                  |                  |                  |                  |
|-------|------------------|------------------|------------------|------------------|
| NEIL2 | 103.356071080819 | 65.9098543816057 | 107.034189847828 | 68.1992221684165 |
|       | 102.913039837094 | 111.240804216088 | 100.891869710611 | 68.3372228877569 |
|       | 91.5370872909881 | 125.393232344778 | 128.425508339423 | 106.20479137406  |
| NEIL3 | 39.6609238036815 | 44.3529919625344 | 37.9482157381008 | 39.5637454855233 |
|       | 44.9936360641969 | 40.244271403831  | 40.1613888954735 | 41.9315419791594 |
|       | 51.0492389286271 | 36.7439906400209 | 40.1362682639916 | 35.6928955245309 |
| NEK1  | 75.8122107270212 | 80.3676231413295 | 67.5417980425932 | 91.5202521578181 |
|       | 80.1294564809102 | 120.392561825049 | 79.7564155881026 | 100.696072546592 |
|       | 69.734208465775  | 139.328628553223 | 81.3454589502043 | 90.689813277023  |
| NEK10 | 42.4757115539502 | 43.3458769998118 | 44.2405728317107 | 47.481302504066  |
|       | 38.2496050953547 | 41.4186558780356 | 44.9027423017108 | 42.357910063876  |
|       | 42.3908047744487 | 42.2455707947223 | 42.881371896984  | 43.128936937037  |
| NEK11 | 42.668311948721  | 49.260242314197  | 50.8720311700491 | 43.9577120438279 |
|       | 48.4670130605028 | 52.902043370862  | 41.9393838138203 | 50.9933795450314 |
|       | 46.5549623118323 | 53.0357938671646 | 45.0965569801852 | 47.9175508887533 |
| NEK2  | 74.2151462073098 | 119.905655993777 | 69.5937318502259 | 42.8235313007746 |
|       | 100.443584075821 | 48.0080291106034 | 120.881290860109 | 85.2849531543957 |
|       | 90.1964013788257 | 38.4829727716328 | 43.8002456102021 | 45.7206695113999 |
| NEK3  | 46.2991903896282 | 47.4630625313159 | 48.4497719907777 | 50.0526763693329 |
|       | 44.2166118829877 | 42.8181679217665 | 45.1679144865704 | 43.6796077697854 |
|       | 47.1744296124496 | 50.1649089793069 | 47.5673419710251 | 45.0673109728911 |
| NEK4  | 46.7293238583888 | 50.9643363406241 | 49.9256753636167 | 48.4916117779992 |
|       | 54.1225249245036 | 51.702461863489  | 51.1541843174981 | 57.7805922926828 |
|       | 44.619512785899  | 49.3000844711116 | 47.4630625313159 | 49.0655215909632 |
| NEK5  | 35.4287975493553 | 33.0553208959996 | 36.2683886571585 | 40.3180310664156 |
|       | 35.7973685350741 | 38.2293008890613 | 37.0564573649223 | 41.1575777497576 |
|       | 33.5578650644246 | 34.9138625012006 | 33.9478220100351 | 40.0557788909923 |
| NEK6  | 203.53267380432  | 77.6653462778309 | 52.2132783757422 | 223.501516374076 |
|       | 189.890451486324 | 137.286091889421 | 88.0664425843955 | 92.227126770051  |
|       | 81.4783226003925 | 79.1074681877535 | 119.528720998614 | 94.3953345963359 |
| NEK7  | 46.3390850717989 | 48.5905518770847 | 55.4502804236424 | 44.1483976313959 |
|       | 61.3077641493507 | 115.577618925646 | 41.1507980856436 | 46.4672637826582 |
|       | 42.6366765186182 | 44.1379638573455 | 47.6884372645373 | 53.4735821194294 |
| NEK8  | 59.1311136551108 | 56.8373628733077 | 64.2404293863468 | 65.3191216270241 |
|       | 61.5236837309467 | 42.5660695551615 | 80.2289541115146 | 115.052948380817 |
|       | 71.6573554353691 | 134.285947677624 | 101.699631771662 | 79.7238173467616 |
| NEK9  | 44.3355304829989 | 49.1283590719461 | 42.0621425894624 | 43.3078542962968 |
|       | 38.8456942580061 | 50.8533737532786 | 56.3376046940285 | 43.7396619462033 |
|       | 41.5635499110307 | 44.8997235283254 | 42.911855821602  | 39.4490233720848 |
| NELF  | 147.444007777385 | 77.0927030014721 | 68.0649030501515 | 43.8002456102021 |
|       | 131.496769528338 | 88.6287852712744 | 54.6414321010929 | 85.5316122504411 |
|       | 56.702421372165  | 78.3851687801705 | 86.582851157193  | 63.8558858499025 |
| NELL1 | 44.8914371498528 | 395.144059157625 | 48.6037684272115 | 45.334106390212  |
|       | 54.2301964914419 | 39.4953494583071 | 46.3057385979341 | 46.695848687694  |
|       | 42.4540072551568 | 44.1379638573455 | 45.8180710486329 | 44.6484005362281 |
| NELL2 | 45.8108990837624 | 124.324905704041 | 50.9933795450314 | 65.8926843080114 |
|       | 49.1928206164702 | 43.3785777889265 | 62.1970616836737 | 44.1311654985682 |
|       | 131.365512154718 | 106.317388820963 | 180.756651647731 | 65.0495374451854 |
| NENF  | 594.184150517102 | 423.804472820231 | 587.88126282119  | 413.990148966099 |
|       | 442.380936516984 | 1110.39060103557 | 691.94603958547  | 768.888528247493 |
|       | 676.672146226382 | 902.691776563423 | 726.42773300581  | 696.946621824188 |
| NEO1  | 102.044838876428 | 64.6970918899831 | 72.0243286940589 | 65.084620579901  |
|       | 72.9154861179393 | 67.1729762600915 | 104.158950889938 | 84.3526980051279 |
|       | 120.26537515666  | 89.3011777476649 | 87.4273245333478 | 79.1209792219434 |



|         |                  |                  |                  |                  |
|---------|------------------|------------------|------------------|------------------|
| NES     | 82.4263339218052 | 94.6300022444815 | 137.034037711549 | 114.611557317665 |
|         | 119.86041265821  | 174.559216176175 | 44.6032218589199 | 86.3237770387663 |
|         | 54.4059109100338 | 145.676955166566 | 186.195424728755 | 84.1780237893807 |
| NET1    | 438.22469176123  | 314.782545392841 | 365.860501246879 | 140.226992517573 |
|         | 1564.55598228713 | 544.946796643478 | 442.711822532078 | 603.224267841548 |
|         | 778.723771259404 | 246.568253751149 | 288.190015621249 | 372.330242931581 |
| NETO1   | 40.9978174736075 | 37.682087731812  | 40.148780650831  | 39.4433784795209 |
|         | 38.0057289062111 | 42.0574848021044 | 39.9636102060469 | 40.8907306844172 |
|         | 40.3536148015242 | 39.0332157000945 | 40.6857324478814 | 39.5686456937437 |
| NETO2   | 116.103491885674 | 143.233722839451 | 83.4679576894911 | 151.601402122351 |
|         | 198.360449141425 | 59.2643906275025 | 233.501069644324 | 114.84900130932  |
|         | 199.522267292552 | 121.712800273272 | 109.23113111292  | 145.509901200987 |
| NEU1    | 534.292112344761 | 186.395673402867 | 214.927272114101 | 384.919835924792 |
|         | 280.920208331594 | 199.123340814127 | 247.327094930096 | 268.936151471133 |
|         | 309.344766670365 | 210.958578914607 | 226.262409390222 | 215.033807819308 |
| NEU2    | 40.148780650831  | 35.4484652445078 | 38.9790184198145 | 38.2041059863839 |
|         | 41.5668884168669 | 36.3845892764084 | 36.08956004634   | 35.6825474397235 |
|         | 37.7384958256497 | 46.5650556481721 | 43.0971787292711 | 38.0452862258803 |
| NEU3    | 31.8228237796461 | 42.0709558258414 | 37.3687900733549 | 38.4208429103799 |
|         | 49.8304479381623 | 44.8872784170036 | 32.2796484885898 | 35.9023742468744 |
|         | 43.1805016690297 | 35.6208308220005 | 46.2560238004757 | 45.9693232070002 |
| NEU4    | 38.7537364570873 | 41.9894412416874 | 37.0642268327439 | 62.8201270538435 |
|         | 39.1650142708257 | 52.7156971154405 | 41.8315602975157 | 38.6454098044474 |
|         | 38.5252456306656 | 34.7308008643142 | 37.3687900733549 | 37.6557714476853 |
| NEURL   | 41.5421429082231 | 44.3529919625344 | 43.8495248991589 | 40.0698728584484 |
|         | 37.1565984182084 | 44.4619248757502 | 38.0598374201407 | 44.5029690493211 |
|         | 38.0213051227859 | 41.0057887014368 | 45.9104478407175 | 39.8497227447888 |
| NEURL2  | 49.9419897484381 | 57.9509155144056 | 61.4416707689893 |                  |
|         | 59.0965219753805 | 77.6174893940285 | 93.6236680572139 | 68.2708120569221 |
|         | 51.555506218204  | 52.1788489555942 | 60.1466326805616 | 61.8445915808329 |
|         | 55.1804535845496 |                  |                  |                  |
| NEUROD1 | 39.5676051939342 | 39.2907645923217 | 41.1367478979484 |                  |
|         | 41.5464765641928 | 39.6535880152834 | 40.4359177791566 | 42.8684958525042 |
|         | 40.5158867964016 | 39.2809305246091 | 35.195364621675  | 42.8263096141654 |
|         | 40.1700117452801 |                  |                  |                  |
| NEUROD2 | 40.3478825593224 | 43.2109153553335 | 43.8153459269057 |                  |
|         | 41.7144525110048 | 43.004943518025  | 40.5281496800812 | 41.3094485574845 |
|         | 39.9576138799997 | 41.3803269429468 | 38.528621456378  | 38.079222289614  |
|         | 40.0557788909923 |                  |                  |                  |
| NEUROD4 | 42.6036491382658 | 42.9358255168086 | 41.6079958749402 |                  |
|         | 35.0448343468967 | 35.9894133432376 | 38.8336427948187 | 35.3362091871364 |
|         | 41.9315419791594 | 42.7150227340364 | 36.3612409063792 | 39.2542963855807 |
|         | 43.8575940017119 |                  |                  |                  |
| NEUROD6 | 45.4799270968969 | 42.2577689927563 | 45.310660704531  |                  |
|         | 40.646702696033  | 48.8381507187986 | 48.5835484742456 | 51.1541843174981 |
|         | 44.9977782988116 | 45.0997987980157 | 41.2276963324981 | 43.1931731665131 |
|         | 41.4508241771315 |                  |                  |                  |
| NEUROG1 | 42.442231667357  | 35.9305494063137 | 43.9450023643394 |                  |
|         | 42.5664883002833 | 43.1252272136667 | 37.5887129572848 | 44.8643898647322 |
|         | 40.2382908228517 | 43.0930293831497 | 39.1621898366355 | 37.8372168909583 |
|         | 46.2625470410195 |                  |                  |                  |
| NEUROG2 | 45.4799270968969 | 41.7337506166619 | 37.3687900733549 |                  |
|         | 46.4555908533915 | 44.2607789091176 | 42.2577689927563 | 40.4359177791566 |

42.8482181313226 43.7630587657205 37.7315666632629 47.7535797917441  
 42.57175366709  
 NEUROG3 39.1590964332473 43.0227387991135 41.1367478979484  
 37.1894304543751 37.3508690072156 40.8634043028528 38.5066108855005  
 43.5544347011646 46.4861258030402 42.8936990772838 43.0016969050339  
 36.6603338274678  
 NEXN 67.3816715975056 54.8439819445945 63.6334154351075 78.1583955490018  
 53.9074374788981 485.871284967735 42.629412460409 57.6684494624163  
 48.0163377492228 135.007055711266 190.375732394043 349.030389220324  
 NF1 65.1424206085551 54.1773909134233 55.2141529491512 56.6458456890715  
 54.802736966312 48.3686935595826 66.1940959364976 69.0819394834919  
 66.603126065489 109.844156801015 81.9218437790485 79.8331445290301  
 NF2 45.6001828766679 44.9863726205428 44.0236957606188 42.281606728072  
 42.6575535390785 44.0430338499507 46.7800033479223 44.3474518504781  
 41.9635525160083 39.9948390976317 42.4936568678084 41.6937331921166  
 NFAM1 36.4564050256915 36.9994058279362 39.991353369336 42.6913548400127  
 36.6354013629791 41.159706131351 39.7576136507593 32.8834169462007  
 33.3643994200057 42.8936990772838 37.7384958256497 38.2350720635382  
 NFASC 47.611018474151 44.1239711172417 42.02667925031 45.334106390212  
 57.6791750431251 48.2959356675864 44.0299389687796 54.1209915784625  
 47.304280327247 44.4209706505478 48.2391540335232 45.5442703626037  
 NFAT5 65.5495324730507 101.426462865382 133.41667178516 127.676574457297  
 121.92772785579 79.8026267036553 84.3040298294164 74.0831311663524  
 68.6772338397672 89.5349434357106 100.756165194192 134.307645598718  
 NFATC1 37.0884880300916 37.5744758489137 39.0470836345045  
 41.2575219633134 38.8834538955 42.4155142987678 38.1793598983615  
 46.0043807840705 42.3277879701507 43.0919221375514 36.5564228761751  
 39.3730169528839  
 NFATC2 45.0283997415478 38.6704566269103 38.941855825269  
 36.890925044696 37.8242236505241 40.4359177791566 39.9559575274857  
 39.1128725343972 42.2248608921879 41.5435611403119 39.0061493066838  
 37.2291018661279  
 NFATC2IP 46.4775637378703 53.792558158226 63.1780854659428  
 45.2839148588396 62.105802634526 46.2072687763147 45.4099017636255  
 49.6203214143464 51.6159542017038 45.6320781307462 46.4482728443638  
 48.8950483142389  
 NFATC3 58.2571968311834 52.0663533163337 54.1240583139871  
 61.6839343510302 63.7698113513374 58.9081750508316 59.3549213146532  
 60.9648845690177 62.7977686460693 63.9129423266349 63.9851732498913  
 66.0441936179555  
 NFATC4 43.7585538437696 41.2598458726002 36.769073068743  
 39.6292788039793 39.3667161654772 59.7009992986607 40.9157352260901  
 45.5581356216957 41.5635499110307 47.9056710878325 52.902043370862  
 43.6753843488695  
 NFE2 183.028254350275 57.0082102559228 46.1653991089885 136.541379502691  
 45.8051846088552 79.2701322339022 67.7965120293445 42.5435283762933  
 42.5406888281114 50.0564735608363 46.5650556481721 41.1554481567603  
 NFE2L1 647.868022835702 245.888237156849 214.100443708064  
 347.908556198025 222.696947669812 426.276230164353 276.214079735778  
 394.437597863822 406.964801954621 605.338871441599 622.207745395746  
 440.93348620369  
 NFE2L2 325.172633427119 599.670771796585 688.612748336336  
 1201.00042684883 540.304257899761 803.548811322583 417.086922265732

527.439095170064 378.626656077546 476.653723741096 709.730555484551  
 995.397944432196  
 NFE2L3 73.5788549535062 99.571118823509 76.7791768896805  
 115.913030448537 105.825228126465 60.9446532180211 121.104663867264  
 129.865093249948 160.336517310154 68.2372031645261 52.9567386506107  
 82.9322141700549  
 NFIA 75.0704619826557 57.5197017161209 119.333788465158 88.9113618165337  
 112.60230393988 517.104607715151 50.3519150282938 74.9541456286637  
 81.4783226003925 154.149426842591 267.657143781939 202.325629133577  
 NFIB 269.284584971871 100.671408579579 131.717764850211 283.393280512514  
 134.713725350463 996.520340280883 912.757335169259 534.881442644054  
 210.38953368311 1263.76838179117 1099.52344340557 768.354209323884  
 NFIC 44.8457078326832 51.7689239921865 53.7316344826448 57.1863195337055  
 59.4830424460714 72.8472187581193 54.4384603094793 52.683711208052  
 43.9104473952446 50.7855742231932 57.1595768494068 52.1646670865427  
 NFIL3 104.059057437473 54.8439819445945 58.0218262176065 227.170944398338  
 83.9387217886961 264.786938886338 100.139490974785 100.813818453306  
 70.3613168347492 59.1496467460507 75.8056934060866 146.509308841361  
 NFIX 571.170643523692 187.086662645246 115.683762821211 225.35760689842  
 670.023570141464 2108.03351084959 141.501071047479 389.686780706341  
 648.885062676884 1169.14891282789 1442.72006787259 603.480973260738  
 NFKB1 649.487838020327 1426.87261062373 1167.25317435052 2978.46032143413  
 974.296760034984 871.238169066998 1139.81870068001 855.602941621804  
 1183.62228577053 993.626865290891 1053.67279913417 1126.31998762007  
 NFKB2 72.2527203451447 76.2591822114739 78.7103847663605 149.173801572239  
 62.3990310986805 90.6431915380214 95.6697427870979 84.8193235226936  
 61.9179665598635 66.0397471691747 67.0695260207402 74.4851052263387  
 NFKBIA 793.570993808328 1848.50311456636 3296.66056024983  
 7911.19531717602 3001.25236839028 3575.78813099057 5601.18872540083  
 5177.04105968809 1089.08276262641 1354.50256889331 2126.41018877615  
 1221.31634960736  
 NFKBIB 50.1833483241864 66.9340967279385 63.3936612506971  
 68.1992221684165 77.007438266156 62.615193215859 89.0203733091224  
 61.4569050766419 70.6616541155513 50.0564735608363 52.3187919317561  
 51.6660481331154  
 NFKBID 42.5193208629123 51.3800036046133 46.8267540220952  
 63.4531374125233 54.4586176399381 51.9421032049606 46.9929836306816  
 42.0494116081998 50.8485682149772 47.2299678280724 43.844855336215  
 41.5536168238478  
 NFKBIE 73.0970339739187 64.9959712888709 61.841867306916  
 90.0942781313264 68.7911855725594 54.4753345912615 66.0350709576651  
 87.8724689898823 56.0496524902806 54.4825201506931 53.8856501960117  
 71.1595608255838  
 NFKBIL1 46.8141313516997 41.554942319225 39.4710743516517  
 41.5464765641928 42.1650127805175 46.0364000143537 42.357910063876  
 33.7818132446042 37.6383530120621 42.785429206422 39.9070785037411  
 41.3481355128089  
 NFKBIL2 49.3463416794995 54.2924642952939 44.4311655729487  
 48.856176220627 58.8961770381033 39.8455060654531 57.8870110456492  
 49.5185112777773 49.8304479381623 45.2556760873335 44.1148826235374  
 50.0571060701893  
 NFKBIZ 465.887689708274 443.581460031166 238.025903833797  
 1105.00321488322 374.978401470437 1077.94530110976 920.504890206997

|         |                  |                  |                  |                  |
|---------|------------------|------------------|------------------|------------------|
|         | 368.390023942835 | 150.572774995368 | 84.6158251687884 | 126.302564098322 |
|         | 131.431274187099 |                  |                  |                  |
| NFRKB   | 75.4732674021193 | 74.3729155936862 | 72.4913548133238 | 53.9517841438975 |
|         | 100.645556491457 | 61.6219790276408 | 71.0369238830779 | 78.0020909283414 |
|         | 89.0684909049451 | 67.4760456862775 | 67.1477341610979 | 69.1099722732115 |
| NFS1    | 56.1912096308988 | 61.9036392303558 | 78.2301707073642 | 90.407200101342  |
|         | 72.0674952635945 | 56.8135853965652 | 68.878562323012  | 52.4539007817929 |
|         | 56.4740004877665 | 54.6806670921411 | 71.8706847571669 | 56.8056093987178 |
| NFU1    | 308.231730523135 | 290.535354193244 | 290.524288545599 | 228.809697062726 |
|         | 175.798140574991 | 364.962649416567 | 237.582746634246 | 225.690879436355 |
|         | 240.55212989103  | 189.47090669378  | 228.026217504784 | 294.048088688381 |
| NFX1    | 99.5058761858884 | 85.0946882743418 | 76.4212570031171 | 101.317407288794 |
|         | 99.6821042055758 | 116.617120294216 | 93.4726264307041 | 106.691530592115 |
|         | 72.3757385026596 | 111.939677225005 | 106.25367135266  | 96.9662967971995 |
| NFXL1   | 69.4501305462809 | 147.727354881531 | 88.4897895318663 | 82.2766822827861 |
|         | 135.106756607914 | 88.2639730639822 | 125.393232344778 | 116.852483297949 |
|         | 108.589036223189 | 97.2865629929716 | 102.027922691582 | 86.8994288019115 |
| NFYA    | 52.5367085454068 | 64.8254097948745 | 60.7985356140269 | 58.106070377898  |
|         | 63.25187762908   | 49.8472708021525 | 59.1774824918359 | 56.1838945110653 |
|         | 66.7750249658122 | 50.7237607003817 | 59.4188882103773 | 63.6254894053045 |
| NFYB    | 57.6913861717513 | 58.2571968311834 | 58.0218262176065 | 59.987045425047  |
|         | 53.8260140375214 | 90.8335894699136 | 54.1707158323527 | 63.8008894786105 |
|         | 56.3441077510744 | 67.6169355376864 | 73.0247140074919 | 64.7963220317334 |
| NFYC    | 148.595294991115 | 169.276398619323 | 120.96329303892  | 151.225738885272 |
|         | 141.180682718758 | 169.18132209076  | 160.917024416961 | 165.121380058529 |
|         | 155.908644253547 | 185.658246392943 | 200.019523376661 | 128.873145026756 |
| NGB     | 46.3390850717989 | 53.1278271804774 | 48.0191002461099 | 44.9370339275041 |
|         | 47.8075998240396 | 47.9503724044453 | 59.6780848951767 | 56.3560498705517 |
|         | 52.7512110769042 | 49.1928206164702 | 44.3763859390287 | 45.6692241948108 |
| NGDN    | 230.73977644867  | 113.553652429374 | 113.716666562787 | 120.679433440203 |
|         | 137.197328985851 | 147.841274204532 | 112.40706320177  | 138.401109242778 |
|         | 163.844659359002 | 115.342852277396 | 131.39588569388  | 156.276838862671 |
| NGEF    | 46.9939712192224 | 45.1694246393676 | 47.9035532886869 | 37.651298468202  |
|         | 61.7566103867825 | 40.244271403831  | 43.4544762830742 | 59.3164315859919 |
|         | 58.0722340887264 | 55.2214187655851 | 54.8532558909227 | 47.6040671292013 |
| NGF     | 50.1533437545239 | 52.0268699306396 | 50.9933795450314 | 42.1273928203021 |
|         | 50.0580547772867 | 59.9174456081704 | 56.3376046940285 | 50.9933795450314 |
|         | 44.3440839686558 | 69.0530953932111 | 67.3976855661302 | 71.0340758556049 |
| NGFR    | 40.5654775358427 | 38.5252456306656 | 32.771863438151  | 37.651298468202  |
|         | 39.0564222526273 | 34.5886782974123 | 35.3362091871364 | 43.2551508830106 |
|         | 45.4799270968969 | 37.3179578037963 | 34.7308008643142 | 31.372171135652  |
| NGFRAP1 | 282.961489041903 | 321.26586939039  | 643.491217668415 |                  |
|         | 126.038716672534 | 375.354746298695 | 418.01691355558  | 543.640122689871 |
|         | 325.275883498219 | 533.820505121067 | 252.061166074743 | 305.399644617845 |
|         | 540.913422859469 |                  |                  |                  |
| NGLY1   | 94.5358147295719 | 118.752208441493 | 115.408418935236 | 136.392873701653 |
|         | 251.33720343548  | 84.8235093165193 | 148.178364767218 | 121.729442469889 |
|         | 131.99898435227  | 104.763913120468 | 98.4699679900651 | 112.113501370522 |
| NGRN    | 902.691776563423 | 950.740991182127 | 693.727004855319 | 427.281740164881 |
|         | 760.745188431719 | 1387.28483887704 | 680.279119780451 | 657.310970474676 |
|         | 790.786577596971 | 936.978983469829 | 1171.207937488   | 1090.86617066541 |
| NHEDC1  | 41.3785995857154 | 38.3322849790657 | 40.4882741869718 |                  |
|         | 38.745552403895  | 41.6340461942423 | 42.4580504587581 | 42.9803717121865 |

38.8159908342801 41.5296458719756 39.6719190054379 43.3085358214154  
 43.4709415392696  
 NHEDC2 42.6036491382658 38.7344853699576 41.554942319225  
 43.6726153508978 46.807320159421 57.5570747859662 43.2721716572958  
 39.4322247076926 46.6944238390932 45.7911932481722 41.9495387255163  
 44.6032218589199  
 NHEJ1 40.0557788909923 43.7644428186265 45.989212296035 43.8002456102021  
 41.6806984441849 33.895835691032 34.806104801006 42.9301944191913  
 40.2274522635576 45.1569741609597 46.7386599624801 44.7401523707775  
 NHLH1 46.0023068797812 37.5469247328848 41.0356368374708 42.6913548400127  
 41.7929491793697 41.554942319225 44.6032218589199 40.3357777530419  
 43.1805016690297 48.0211752672327 40.9157352260901 39.5418280570561  
 NHLH2 43.9551059970289 40.3946758935842 41.6550823405646 44.4912617551615  
 42.551356054931 42.5193208629123 43.3262148375525 38.7119440509409  
 42.3138951003676 42.7275315121163 41.7651272076914 43.1805016690297  
 NHLRC1 33.0463640202858 41.7337506166619 37.7384958256497  
 45.7397504535169 36.7356360093603 45.1873487463472 39.2533668167483  
 32.6039814489621 42.8036731479932 42.3606390470387 39.153226699662  
 40.5703581862752  
 NHLRC2 56.4553747079294 73.0385284042351 64.7318794662958  
 59.8102324370568 53.9074374788981 45.6129956328415 67.8919712859031  
 81.6529991377083 55.9423752286714 57.8585041080995 53.7475011049549  
 66.737740728688  
 NHLRC3 112.421316052392 130.65627609817 109.444250004973  
 115.63300104804 91.5618002664085 78.730129036128 94.7604013126314  
 87.0116305167987 95.9298109273155 111.248876636045 102.706563820232  
 110.589130460258  
 NHP2L1 233.232472394727 241.599353653369 253.462941029119  
 178.4681248137 390.647843814517 288.816567137193 243.763402918148  
 191.896416838806 251.65044168003 196.623560874725 237.632703283663  
 311.301613620475  
 NHS 51.7098181032862 48.1829653238565 60.5390917151449 45.1151758109609  
 59.0590113926295 56.087223746633 42.8684958525042 69.5544840164738  
 74.9179396623258 74.369136940675 67.7280831060202 63.2561817029853  
 NHSL2 36.9060997041453 42.2900457798748 37.7384958256497 42.4580504587581  
 39.7162631015511 42.5660695551615 41.5817737564592 40.8833572570383  
 39.5806465938526 41.7405682794166 46.6856047520579 45.7206695113999  
 NICN1 155.270252661048 157.121355906194 222.453547273598 170.720099897973  
 130.293915348934 179.285390561592 250.086163187797 161.929470244265  
 154.111066539468 321.818380385895 285.56460901579 220.621142396402  
 NID1 56.1912096308988 57.9509155144056 54.6820069269589 59.2778887402357  
 70.7760293129408 62.843734579668 47.1345949868029 45.7476095696859  
 47.0804681460898 44.7958122466628 46.0905079010237 56.9379721393904  
 NID2 53.3967242431461 42.4493032770053 42.7303139017786 44.1483976313959  
 43.5544347011646 41.9543948167375 39.8695929627783 39.5466975353131  
 42.1594905198929 39.0648733099061 41.0050831223107 44.8372404608604  
 NIF3L1 391.187784616808 393.337170271481 309.802432824498  
 268.745928429069 536.151587705678 255.521720396044 306.391154574276  
 328.080879084015 383.00934152588 319.659366973269 331.885872312948  
 350.796638646601  
 NIN 73.4208306290635 65.7002710293248 67.9211943239881 121.633811243877  
 57.6791750431251 67.7408925344098 61.9179665598635 69.6975740412402  
 59.6427447868329 64.9401081242429 65.088713927995 63.104563489528

|           |                  |                  |                  |                  |
|-----------|------------------|------------------|------------------|------------------|
| NINJ1     | 491.8684831079   | 311.195207833203 | 326.357036514613 | 1618.92099084622 |
|           | 277.12373983597  | 541.105845300009 | 419.054753590648 | 338.966238813782 |
|           | 265.930422462959 | 280.563427715895 | 341.142651038591 | 303.818507395434 |
| NINJ2     | 200.351560652506 | 85.6763929745253 | 74.2122914028677 | 333.122044191102 |
|           | 102.77259665192  | 191.291480830946 | 71.0369238830779 | 83.0497574039035 |
|           | 69.1129431075514 | 104.928805304068 | 75.3969721155153 | 73.408861359425  |
| NIP30     | 88.6663961027926 | 95.5627648703794 | 121.510087314197 | 105.234356571498 |
|           | 113.444217634165 | 120.392561825049 | 106.878946016737 | 58.4200819624972 |
|           | 106.799510275842 | 86.8691342571214 | 90.4909052059366 | 106.020559220488 |
| NIP7      | 163.788056447509 | 344.657779779036 | 411.047310950296 | 200.036360605006 |
|           | 518.936896882424 | 250.65667565007  | 329.282615395786 | 240.314054155006 |
|           | 267.565744773928 | 129.336439341458 | 142.515628954457 | 178.661935292895 |
| NIPA1     | 76.1969626204894 | 49.83247261979   | 64.5232087947596 | 60.4646208319121 |
|           | 61.8471691369569 | 49.5424425850549 | 61.2183034191703 | 51.6660481331154 |
|           | 93.7090094630558 | 77.4046818339539 | 65.5386366902998 | 65.6213260281822 |
| NIPA2     | 281.016474354764 | 351.439404852971 | 224.707363813164 | 376.931257615162 |
|           | 388.132295362791 | 228.469654751393 | 309.293546994308 | 185.312851727212 |
|           | 347.420750861056 | 187.486245101512 | 177.088290547513 | 128.776189744323 |
| NIPBL     | 94.9001252449925 | 94.0532777456537 | 98.0263883315712 | 121.737071786167 |
|           | 93.3418050966934 | 108.589036223189 | 144.976378707447 | 223.801865347687 |
|           | 134.394743648475 | 123.032006903803 | 125.321349772971 | 118.854313907627 |
| NIPSNAP1  | 260.405228196514 | 393.337170271481 | 341.97050042695  |                  |
|           | 107.242476674629 | 243.717906276454 | 142.957149812186 | 413.723725202787 |
|           | 321.686871145301 | 274.398580571984 | 172.221482103025 | 194.278792348966 |
|           | 188.386331007465 |                  |                  |                  |
| NIPSNAP3A | 56.2508140932179 | 59.135659721231  | 48.8941062980393 |                  |
|           | 64.2926204688673 | 53.4109882045447 | 54.4753345912615 | 59.0457625163577 |
|           | 48.6010563649534 | 56.3441077510744 | 46.2286164776607 | 51.6869155634183 |
|           | 55.216338306812  |                  |                  |                  |
| NIPSNAP3B | 35.6111578834671 | 37.3634897565502 | 37.8386378737561 |                  |
|           | 37.0732977341185 | 38.3561682218911 | 39.132725377815  | 35.2163900400329 |
|           | 37.9837233601316 | 37.6383530120621 | 38.8507804383261 | 39.7342718293432 |
|           | 42.8864415494484 |                  |                  |                  |
| NISCH     | 323.002018912848 | 614.088027946471 | 693.056793637199 | 271.674332647296 |
|           | 885.224377292125 | 496.163796158189 | 312.40869171788  | 284.013140015092 |
|           | 418.01691355558  | 749.206358448939 | 703.315796616275 | 397.199620114138 |
| NIT1      | 64.546412747238  | 57.1595768494068 | 65.2670315837785 | 58.0218262176065 |
|           | 58.6481644777552 | 57.3797835448761 | 66.3209349903185 | 62.2982003555312 |
|           | 105.549249728506 | 60.6266092582071 | 60.6505672212119 | 63.2113624676341 |
| NIT2      | 125.62281563325  | 181.420545696696 | 152.843785599892 | 115.299308625328 |
|           | 210.005571009784 | 152.426698798326 | 264.855020003755 | 295.856741468603 |
|           | 202.751918610777 | 159.22638189198  | 125.383837024985 | 154.681233315729 |
| NKAIN1    | 36.2496364442264 | 39.9697332660833 | 38.4043916290561 |                  |
|           | 34.3595588146954 | 42.3685136297603 | 42.8598805316863 | 41.0381860307445 |
|           | 44.8997235283254 | 42.8036731479932 | 44.7958122466628 | 38.2795150354677 |
|           | 35.9604262434141 |                  |                  |                  |
| NKAIN3    | 48.4849194706125 | 52.1967540852276 | 70.8606919488782 |                  |
|           | 60.1837189855762 | 68.9038222450855 | 51.3886035574416 | 59.3549213146532 |
|           | 47.6952179922944 | 57.5883027758003 | 47.8207974930031 | 45.9104478407175 |
|           | 47.9566297250148 |                  |                  |                  |
| NKAIN4    | 42.9104454767916 | 39.6995529770239 | 42.7303139017786 |                  |
|           | 38.3166554965434 | 40.5710637884029 | 39.2985791324641 | 42.7431359850339 |
|           | 41.0381860307445 | 42.2577689927563 | 42.6793753550854 | 43.3085358214154 |
|           | 39.4490233720848 |                  |                  |                  |

NKAP 44.0707087774725 49.2560467081687 44.6032218589199 47.5733603903505  
49.32293280121 46.5387044784895 48.6395795163502 43.6434576713809  
50.2953638261991 48.9826868640753 47.0540401406168 43.9366081640576  
NKAPL 41.4508241771315 42.1607322031054 39.2707964550441 39.9084621723809  
42.6022652963326 42.1046072075724 41.4186558780356 41.4812544772644  
40.2739700860114 43.781101409552 41.9083581529276 40.8098117292322  
NKD1 48.1952521496489 41.6466169548846 45.3974838013476 46.1673159982664  
50.2163892855092 52.8421046802739 43.4544762830742 44.8997235283254  
42.992884918158 47.3791873993182 53.2083147523758 46.5650556481721  
NKD2 436.216696884703 1327.93833415582 58.2986825661503 83.1614238528477  
1704.0522304387 219.878589678991 391.83348187444 475.881757842864  
82.6157566292355 301.257549182222 257.761541860837 252.712633314274  
NKG7 84.511841810844 89.6389968279976 148.736019591731 433.637087338002  
47.0954207417646 78.5276518966943 93.2133061608764 123.219313750907  
45.6582729799009 109.386655134289 138.349952332963 51.4308501933893  
NKIRAS1 82.1974756449763 78.9900928241723 95.5022104475922  
125.573953188965 146.405413944753 186.002828997122 101.857595722021  
68.3372228877569 92.261357059727 146.534713287435 106.527144354592  
140.719373122712  
NKIRAS2 55.5847026602643 64.8154690917175 56.657759220121  
55.9692669442536 57.974826209076 53.155979669047 64.7488184936482  
58.8700900181234 63.8213322243537 59.7444979429174 58.2768631297386  
53.2046867327331  
NKPD1 37.3463875295726 44.5544727111028 47.5249938729637 43.1847628331565  
44.915045386675 40.9506062495231 41.5817737564592 44.4475838947656  
40.547835538778 51.9547984751408 49.4145011642763 43.2776458914333  
NKRF 111.186223357396 93.8968899420039 97.8309399470621 108.168107241759  
174.537032518715 78.730129036128 113.477848709768 114.959624673123  
131.451150955309 114.321083441061 109.503117647487 116.874313720275  
NKTR 190.465025329717 307.550936236018 399.66182195331 194.395766807005  
524.047008889711 191.482692108417 230.286815921497 246.20973320244  
204.089652936303 453.115133900701 372.02379581293 336.159430045964  
NKX1-1 41.7877325563821 38.6633191400449 38.9405283147826  
46.5331216396695 41.0608773166058 39.5551556615516 41.645120086609  
41.6972107715212 44.5638825490331 43.9701242600947 41.5421429082231  
41.0970259989281  
NKX1-2 38.385865183581 37.1685072112618 34.6977013306396  
36.890925044696 40.8873907150245 40.7616966228404 36.634024014558  
38.2782436497441 33.1602385985469 43.6033221838149 38.079222289614  
36.5474283500601  
NKX2-1 39.4710743516517 187.347386400244 36.4564050256915  
39.9084621723809 36.131485826118 38.7578265341627 37.1104431466673  
38.4540849632254 37.6630259432398 35.4990901121893 37.33030683349  
35.8108713625055  
NKX2-2 36.6480005877129 38.1312950900467 37.6557714476853  
41.3027031037343 42.3685136297603 34.0777108441756 48.6395795163502  
39.1652965788406 40.9901805728485 38.8507804383261 34.7308008643142  
38.745552403895  
NKX2-3 39.7576136507593 38.3322849790657 42.157627240486  
42.5664883002833 41.7929491793697 37.3799542961839 42.4939802311136  
37.33030683349 39.853866204927 35.8304004211528 39.6403089864678  
34.806104801006  
NKX2-5 46.8954576545929 40.0527893189096 37.9482157381008  
40.9607305725196 41.7929491793697 41.4508241771315 43.1931731665131

36.6452480995946 36.197424053556 39.0648733099061 41.7272875295469  
40.6614700944853  
NKX2-6 41.0608773166058 43.0971787292711 44.0451487108213  
40.5484717678957 39.2608760193011 42.6575535390785 40.4359177791566  
40.831207953647 43.6670755115848 46.1390887492649 43.3085358214154  
41.4508241771315  
NKX2-8 37.4554876386402 38.2263227947189 35.2838283525874  
35.6928955245309 35.9894133432376 36.2768299545794 37.7136011474903  
40.2382908228517 40.3316153483289 35.8304004211528 44.2925355984056  
34.9138625012006  
NKX3-1 55.2182004838121 45.0905928998779 44.3344900481112  
39.2780515621926 49.8304479381623 55.1987351219665 50.2016912396771  
52.5909491535773 50.5785738734431 43.2988017098387 42.7275315121163  
49.8253396161069  
NKX6-1 37.0320432433314 42.5269793679335 37.8386378737561  
36.264823544143 43.1252272136667 32.5219627196161 36.4098694708483  
33.5578650644246 36.3649677956953 30.5239050647746 39.9070785037411  
35.0222940937513  
NKX6-2 39.8662795144616 40.148780650831 44.0451487108213  
41.3027031037343 35.9058393060637 37.9951997351435 41.1507980856436  
44.9977782988116 39.9444191873552 45.3530683538086 40.547835538778  
39.3575468494941  
NKX6-3 37.6397652536077 44.6918600441328 40.7620472083159  
44.9370339275041 48.1473938886239 40.9506062495231 38.2933870238743  
50.857522488428 44.3440839686558 45.9004543328976 43.401782064778  
42.9887069977696  
NLE1 52.5792653122861 49.7949228653588 51.3268475761593 42.9358255168086  
54.0536858212253 45.3328270847467 57.51482768194 57.9713749600418  
56.9320717885002 55.1804535845496 52.3304586399695 50.7975577422986  
NLF2 120.630151942485 62.0404348860702 55.6865353018811 59.4674205670657  
49.1928206164702 504.847507464269 78.9900928241723 85.7013212907541  
50.3082459161777 54.000164292461 59.3709786862962 48.7814131120945  
NLGN1 39.1590964332473 37.920964499903 45.5883690965192 38.3166554965434  
43.1252272136667 105.814959179397 46.8613212048981 54.720204938924  
46.2027193115397 100.076931518374 81.2249082772437 68.9258122619781  
NLGN2 156.476627024647 64.8903340853337 154.911548311992 90.0942781313264  
151.175959542368 139.814194128548 87.7107079534841 64.7318794662958  
91.6328359149182 80.0651801266824 87.2316853416374 88.0877175295544  
NLGN3 37.8386378737561 43.3458769998118 41.6977706798234 49.9014504704021  
38.0598374201407 38.8336427948187 43.0930293831497 38.3684202018524  
40.137818555383 43.0919221375514 38.6662194645633 38.8495095797881  
NLGN4X 53.593974682612 46.2286164776607 137.52864596636  
58.6352379241827 42.269054475455 47.8029841385514 41.9918605927928  
59.9770720847728 44.1258877591681 75.2053836356882 83.8811735017279  
83.3729277601518  
NLGN4Y 48.8941062980393 57.2231446406982 36.1042012504758  
38.0958223740111 38.2496050953547 50.0748292497578 47.4439407315335  
61.6839343510302 58.3564461855595 54.6089451252049 57.7786197537899  
54.9919060580109  
NLK 58.1868359012515 54.6089451252049 57.1226931773006 45.1944222548351  
63.5932443357808 57.8005007012205 64.0985088513857 84.607833108004  
59.0563795877672 63.3006977162657 61.0094935318105 54.9919060580109



|        |                  |                  |                  |                  |
|--------|------------------|------------------|------------------|------------------|
| NLN    | 52.109723558511  | 49.6203214143464 | 43.6670755115848 | 48.665578118898  |
|        | 51.1368583672022 | 49.4157684139858 | 50.5252048155459 | 56.9299697426319 |
|        | 55.2114969675545 | 46.8954576545929 | 45.7328341667151 | 44.1452943804044 |
| NLNP   | 48.1952521496489 | 56.1355483199198 | 61.0370242377391 | 43.1847628331565 |
|        | 60.4122350478242 | 44.6524308640784 | 75.287377665837  | 72.5835488194631 |
|        | 46.8873421271259 | 41.6373771565199 | 47.1477056711335 | 45.7562276914441 |
| NLRC4  | 43.5710871617107 | 42.2577689927563 | 43.0971787292711 | 114.124846622876 |
|        | 42.269054475455  | 48.0350549043063 | 46.3057385979341 | 41.0381860307445 |
|        | 38.8271346375425 | 43.6033221838149 | 40.3452320167286 | 43.7672102682067 |
| NLRC5  | 57.1046180136491 | 89.8234189405239 | 71.2246788429078 | 122.412295645862 |
|        | 46.6397391251762 | 56.1671440556142 | 44.4639405506967 | 55.6904617926772 |
|        | 46.1101825640108 | 51.8412522234186 | 52.104880481326  | 46.0633179231318 |
| NLRP1  | 41.8409927585705 | 42.6939394537076 | 50.0748292497578 | 48.665578118898  |
|        | 40.8873907150245 | 40.3946758935842 | 45.4164642922183 | 41.4905114972525 |
|        | 41.6616444147804 | 51.3907321092333 | 45.9725715538987 | 44.9070250604284 |
| NLRP10 | 44.2350046179299 | 42.6939394537076 | 38.7745734037492 |                  |
|        | 41.7614975630362 | 45.3675390992851 | 42.357910063876  | 39.3585350448719 |
|        | 42.9301944191913 | 46.2027193115397 | 40.6022003765153 | 42.6366765186182 |
|        | 45.0985088502363 |                  |                  |                  |
| NLRP11 | 38.5648843914189 | 38.0226905622357 | 36.2683886571585 |                  |
|        | 38.6414316877471 | 40.0599807618105 | 40.9506062495231 | 40.9157352260901 |
|        | 38.6454098044474 | 36.5393857306744 | 39.3698811593364 | 36.7283081422707 |
|        | 41.3481355128089 |                  |                  |                  |
| NLRP12 | 39.6349162264993 | 37.7384958256497 | 40.2382908228517 |                  |
|        | 65.2295773603116 | 38.7937049365871 | 43.647594238679  | 41.323023670277  |
|        | 41.496883371243  | 40.6957787921451 | 41.683412864532  | 37.9540590751706 |
|        | 37.4007080128061 |                  |                  |                  |
| NLRP13 | 41.3387790895716 | 38.5252456306656 | 44.1452943804044 |                  |
|        | 40.4359177791566 | 40.7779767565889 | 39.7394181011603 | 40.1235656101329 |
|        | 37.9837233601316 | 43.4656637536244 | 41.1222709786153 | 39.5399188536544 |
|        | 40.2669497398702 |                  |                  |                  |
| NLRP14 | 37.6397652536077 | 39.7835513496873 | 40.4070046183108 |                  |
|        | 42.4580504587581 | 42.4864576619427 | 40.244271403831  | 36.08956004634   |
|        | 37.6557714476853 | 37.8319142847141 | 45.5776159432079 | 44.1148826235374 |
|        | 35.2448979801094 |                  |                  |                  |
| NLRP2  | 39.0620487644635 | 185.165420581989 | 284.66531382201  | 89.6115806694241 |
|        | 537.841677481011 | 116.900364583878 | 245.0324923457   | 241.118200030836 |
|        | 229.428422408702 | 39.8873706855774 | 91.1363393944977 | 57.6860752168769 |
| NLRP3  | 45.9356781508849 | 49.5371260159306 | 56.2441895183416 | 812.386878774445 |
|        | 41.2397693523949 | 96.6957892186886 | 114.288115730578 | 50.0991178780329 |
|        | 37.9273653326866 | 36.5366339599021 | 39.3118883678101 | 41.8264657291934 |
| NLRP4  | 34.4896350146096 | 40.4359177791566 | 40.6737160001291 | 46.3203995372658 |
|        | 40.2449343247539 | 43.7630587657205 | 44.4639405506967 | 38.1835938174625 |
|        | 39.7537274655115 | 40.1179210534118 | 40.8225507267584 | 42.1537476443423 |
| NLRP6  | 36.3649677956953 | 37.2810767789306 | 35.8265993915844 | 41.0726336841311 |
|        | 40.0599807618105 | 35.4142595025086 | 37.1643693306382 | 33.4534810696886 |
|        | 37.3600014814388 | 40.2112371512838 | 43.9450023643394 | 39.6352613956998 |
| NLRP7  | 39.0620487644635 | 43.3030298816484 | 41.437237454134  | 53.856111425678  |
|        | 44.4489662507893 | 39.6705473876526 | 62.9655943706731 | 41.496883371243  |
|        | 43.9133744699066 | 39.4710743516517 | 39.8564579050221 | 40.0557788909923 |
| NLRP8  | 1260.45604038487 | 546.80979198725  | 640.78586776574  | 1014.6400720037  |
|        | 427.451886998067 | 348.328616284658 | 864.302844775203 | 2528.6392272518  |
|        | 427.066481790415 | 1716.82239359769 | 1752.11152588494 | 1211.8832855325  |

|           |                  |                  |                  |                  |
|-----------|------------------|------------------|------------------|------------------|
| NLRP9     | 40.8681871019812 | 39.6123051184545 | 41.6977706798234 | 41.6564075217517 |
|           | 35.4484652445078 | 38.6414316877471 | 42.2577689927563 | 35.6825474397235 |
|           | 39.0775870687758 | 36.5806287103157 | 32.6463318577756 | 41.0657892043496 |
| NLRX1     | 100.883604376864 | 152.555556133364 | 106.762097616497 | 77.0774476767901 |
|           | 93.4726264307041 | 90.5359675350156 | 103.707931766117 | 105.009081898873 |
|           | 98.1968987868987 | 102.771611905219 | 92.8089247593564 | 77.2608629053098 |
| NMB       | 311.149068752273 | 343.418685340038 | 109.594402843796 | 155.018308238778 |
|           | 300.057362423939 | 138.703293882141 | 283.484056482174 | 147.557451530784 |
|           | 285.901316389161 | 107.122319086614 | 109.23113111292  | 125.512567429299 |
| NMBR      | 39.9697332660833 | 39.1982470626863 | 41.1367478979484 | 41.0726336841311 |
|           | 40.5710637884029 | 36.6996187567892 | 38.0598374201407 | 34.3865306339645 |
|           | 41.2870505273664 | 43.6033221838149 | 35.5179217192467 | 43.6753843488695 |
| NMD3      | 102.483081702338 | 114.230358276599 | 160.499410146402 | 87.0187282933132 |
|           | 180.15711251649  | 130.775349446374 | 108.08526252608  | 189.289063944393 |
|           | 148.770228614661 | 105.962195935529 | 103.727217972304 | 168.561260174501 |
| NME1      | 525.16535463798  | 436.216696884703 | 354.158105175308 | 339.52415679299  |
|           | 883.06773454117  | 305.684635013927 | 685.386956092142 | 531.69595054137  |
|           | 787.671342652389 | 233.201890340549 | 296.842555066902 | 361.776841675393 |
| NME1-NME2 | 783.440408023061 | 970.379875059112 | 931.401929277001 |                  |
|           | 619.950241162173 | 1418.94307844471 | 1109.17675353971 | 1127.96214301065 |
|           | 592.010988342149 | 1208.33498233518 | 494.162646055732 | 590.139974503603 |
|           | 963.224016480187 |                  |                  |                  |
| NME2      | 53.4921736109774 | 64.7650773032999 | 62.8050945727712 | 65.524821699432  |
|           | 81.0880833950735 | 57.2960245538881 | 72.6450859740011 | 59.4236178078244 |
|           | 77.6870769927325 | 47.8636003588181 | 48.170173274889  | 55.6826090879246 |
| NME2P1    | 36.5393857306744 | 40.5400384479766 | 45.8844325913247 |                  |
|           | 42.8235313007746 | 46.3150221024046 | 43.8582747295766 | 45.3597029614942 |
|           | 41.9315419791594 | 41.7627910693483 | 41.1222709786153 | 40.547835538778  |
|           | 42.57175366709   |                  |                  |                  |
| NME3      | 356.503013319738 | 442.546348599648 | 843.882354867791 | 276.267583952979 |
|           | 229.035497774884 | 461.394007153992 | 264.855020003755 | 220.054040993848 |
|           | 337.156068385541 | 828.403901345618 | 804.070613101101 | 469.78210773245  |
| NME4      | 515.216890329893 | 440.421077161585 | 769.685677484067 | 285.97627172608  |
|           | 872.305108096296 | 1323.73429724066 | 592.989860385203 | 335.818251279914 |
|           | 601.375421126664 | 766.027617496754 | 871.238169066998 | 667.837116137964 |
| NME5      | 38.7537364570873 | 36.7976562409506 | 37.5597671487621 | 33.9645433044281 |
|           | 37.7576900881741 | 48.5835484742456 | 45.223075311113  | 51.7538628098347 |
|           | 37.7384958256497 | 77.1767494799711 | 50.7159667633757 | 43.0930293831497 |
| NME6      | 83.4679576894911 | 83.3729277601518 | 105.647054678056 | 76.3693529894936 |
|           | 116.617120294216 | 86.8330533522204 | 149.551650453179 | 83.7829283976292 |
|           | 91.4121563150184 | 78.7260936224802 | 86.754538970161  | 81.0169370911764 |
| NME7      | 68.021673481871  | 59.1107691694766 | 71.5484567134601 | 55.8709511400674 |
|           | 67.0163226819964 | 91.5464279432216 | 82.7853677822046 | 53.1052228246467 |
|           | 62.5327652825303 | 65.3672880026114 | 62.5528124447176 | 86.0735583144514 |
| NMI       | 146.658116519622 | 162.902264837659 | 103.071727621257 | 203.152852313746 |
|           | 85.4420599474339 | 114.389392280707 | 163.458716079887 | 127.213248611204 |
|           | 173.013258797349 | 86.500678864429  | 93.5045354990096 | 114.84900130932  |
| NMNAT1    | 44.0328992213727 | 57.1595768494068 | 56.1434024065079 |                  |
|           | 55.6481366056639 | 54.6820069269589 | 55.9351706773613 | 51.7714254834195 |
|           | 51.7538628098347 | 46.4164127487052 | 57.0581769379589 | 56.9320717885002 |
|           | 65.524821699432  |                  |                  |                  |
| NMNAT2    | 41.7397731376692 | 41.2276963324981 | 42.4580504587581 |                  |
|           | 46.6986977330569 | 39.9182914210537 | 42.2857372794461 | 44.7915315085948 |

|        |                  |                  |                  |                  |
|--------|------------------|------------------|------------------|------------------|
|        | 42.4864576619427 | 41.074824727477  | 40.1179210534118 | 41.9455842688118 |
|        | 37.6276092293112 |                  |                  |                  |
| NMNAT3 | 49.6241203903354 | 46.5952288260503 | 48.8941062980393 |                  |
|        | 51.1313686723929 | 80.675913085168  | 75.4227827818591 | 56.4809146784765 |
|        | 75.5830548489892 | 60.5608545741456 | 87.3815040456105 | 75.2391243965793 |
|        | 77.7506984396769 |                  |                  |                  |
| NMRAL1 | 274.259417498569 | 291.785618741057 | 572.667024472672 |                  |
|        | 205.154378853199 | 492.710488250721 | 245.853111206859 | 520.722292021743 |
|        | 196.065114892186 | 453.652548085387 | 456.467726693355 | 326.805803266857 |
|        | 228.984484917083 |                  |                  |                  |
| NMS    | 41.6354649482853 | 40.0527893189096 | 42.4580504587581 | 43.1847628331565 |
|        | 44.147557390293  | 42.0574848021044 | 37.7136011474903 | 38.2782436497441 |
|        | 40.0403898620771 | 44.0409178714232 | 45.0589947942306 | 41.1554481567603 |
| NMT1   | 96.6833301748676 | 65.2966707319433 | 59.9690744676539 | 52.3004056941891 |
|        | 106.804269453898 | 77.6115604215716 | 110.048921728774 | 79.4916415027015 |
|        | 87.6726059613969 | 92.0862930476852 | 81.8648220673828 | 110.52925781809  |
| NMT2   | 59.1311136551108 | 61.18889498318   | 63.7744603935682 | 66.0397471691747 |
|        | 53.6210959113222 | 115.577618925646 | 80.1461294346211 | 48.3590401011623 |
|        | 62.7205631511304 | 91.2016867646161 | 94.5716601751149 | 85.2598847559951 |
| NMU    | 42.442231667357  | 46.1569135229922 | 46.0727230219512 | 42.2496337895968 |
|        | 49.9493230064613 | 41.3553369544097 | 116.913991315353 | 59.6720198281342 |
|        | 233.72882333861  | 45.1569741609597 | 47.2134341420411 | 45.4799270968969 |
| NMUR1  | 40.7609952437622 | 36.6002100641539 | 43.3085358214154 | 40.5484717678957 |
|        | 38.8456942580061 | 41.3553369544097 | 40.3302268293707 | 39.2672712041774 |
|        | 41.074824727477  | 39.0648733099061 | 45.390192977585  | 40.2669497398702 |
| NMUR2  | 46.8954576545929 | 41.554942319225  | 49.6347864008749 | 39.2780515621926 |
|        | 38.6454098044474 | 41.8613406887824 | 40.1235656101329 | 35.3608605269276 |
|        | 42.8036731479932 | 39.2623423164488 | 36.0481934423077 | 36.2582325396375 |
| NNAT   | 41.5421429082231 | 40.716553247236  | 41.1367478979484 | 41.4273122914951 |
|        | 39.1087466732192 | 231.893992191022 | 39.700936357233  | 48.2109175258674 |
|        | 46.0633179231318 | 107.015362116555 | 66.991625911443  | 232.553783060082 |
| NNMT   | 412.421643885499 | 107.331284864757 | 118.10944558223  | 368.853558193357 |
|        | 156.615248744544 | 628.403814060213 | 80.882176929636  | 134.085457101528 |
|        | 71.3197554517106 | 100.271925566074 | 98.8537074610939 | 308.568617575909 |
| NNT    | 51.6869155634183 | 66.7750249658122 | 63.0670482657086 | 62.9247740568696 |
|        | 108.750364850147 | 80.1549028765037 | 96.4033477961156 | 73.5950442915143 |
|        | 99.5578314630436 | 63.9650465690339 | 64.7318794662958 | 86.1055862202537 |
| NOB1   | 64.3502363726659 | 91.2647023876304 | 122.258194040815 | 58.7338159410728 |
|        | 111.669813610213 | 94.1128427766432 | 98.2843999216669 | 81.6529991377083 |
|        | 96.0418367475772 | 73.3479915711031 | 75.1853590860646 | 75.032753683526  |
| NOBOX  | 39.8234920704779 | 38.6704566269103 | 38.5442780220289 | 40.6892234267786 |
|        | 42.4493032770053 | 38.2293008890613 | 38.5474297403025 | 41.8417024632349 |
|        | 41.7233690251839 | 37.5343260962758 | 42.357910063876  | 37.1747156131306 |
| NOC2L  | 68.7436392042714 | 98.9017950719795 | 67.895735332714  | 64.3746985855249 |
|        | 87.6178717341967 | 60.4065050472082 | 81.6458112867541 | 95.4162505381269 |
|        | 77.9028721785469 | 53.7196173866021 | 65.6824363141962 | 55.7067742610401 |
| NOC3L  | 141.471672990444 | 173.288267403695 | 183.028254350275 | 197.325473090277 |
|        | 219.918644151214 | 196.427458710993 | 164.580141651883 | 164.529367656711 |
|        | 123.817018264773 | 145.509901200987 | 151.758051124404 | 234.333935191237 |
| NOC4L  | 81.0057400164851 | 60.2165699959135 | 67.6373573669424 | 50.6262443356159 |
|        | 63.955655956484  | 54.6571265188154 | 67.6057928906834 | 62.3407956701767 |
|        | 72.1090339831747 | 58.3285450269055 | 53.7792717770978 | 52.0863423572635 |

|       |                  |                  |                  |                  |
|-------|------------------|------------------|------------------|------------------|
| NOD1  | 86.3054012048636 | 73.4899394858239 | 99.8231023149756 | 74.0093517743852 |
|       | 59.5844022026141 | 91.640286556353  | 81.0331497830643 | 65.813547096222  |
|       | 74.7934385405346 | 72.1090339831747 | 55.4694986901287 | 64.531467526747  |
| NOD2  | 74.3135387703106 | 48.0296332183129 | 46.1653991089885 | 214.281036491237 |
|       | 36.9060997041453 | 43.2805590023412 | 50.0088611244948 | 45.7476095696859 |
|       | 49.641159251878  | 38.745552403895  | 44.7114813656401 | 38.5279745308203 |
| NOD3  | 46.8141313516997 | 46.29198852834   | 48.1997158668729 | 42.5664883002833 |
|       | 41.1868052124344 | 44.4619248757502 | 43.6753843488695 | 46.9986083378817 |
|       | 43.7630587657205 | 44.6918600441328 | 44.9713479185144 | 42.2577689927563 |
| NODAL | 48.0201377454632 | 45.8669209716694 | 46.3411353377615 | 41.6564075217517 |
|       | 45.8051846088552 | 47.0027453663546 | 42.4939802311136 | 42.157627240486  |
|       | 47.6195009345747 | 42.785429206422  | 46.4205654140754 | 45.4799270968969 |
| NOG   | 38.957687788868  | 42.0709558258414 | 39.4710743516517 | 39.066284740632  |
|       | 39.3667161654772 | 41.554942319225  | 43.5627649099623 | 42.5435283762933 |
|       | 43.8482802038826 | 41.3321861371202 | 40.0766543123257 | 43.1805016690297 |
| NOL1  | 156.382146982116 | 147.65688475427  | 160.973602503707 | 122.642481894309 |
|       | 227.280284979503 | 115.827601697699 | 158.637047990511 | 173.856274004533 |
|       | 145.083624161597 | 112.977333058979 | 130.703767898434 | 118.587373377593 |
| NOL10 | 65.9273663561152 | 57.0875538213735 | 59.8273072817267 | 68.1992221684165 |
|       | 61.6452971581503 | 52.6226745117396 | 62.0404348860702 | 61.6839343510302 |
|       | 56.5094373275922 | 58.115198353247  | 60.394307846869  | 55.6351010690528 |
| NOL11 | 292.86576686019  | 271.813877560354 | 234.004293901222 | 252.487015579489 |
|       | 540.721068846198 | 239.885284409329 | 393.337170271481 | 390.489537450621 |
|       | 400.506633704584 | 346.621778258188 | 261.421333472097 | 283.484056482174 |
| NOL12 | 114.016824404095 | 101.277664841914 | 206.08791147394  | 84.2804410361247 |
|       | 138.895316905243 | 57.013135787334  | 89.4747568145717 | 69.1973371867031 |
|       | 106.654782265295 | 114.972374827795 | 125.383837024985 | 104.486555491331 |
| NOL14 | 107.325456368022 | 164.735191308776 | 122.258194040815 | 111.347228208501 |
|       | 178.624349589089 | 115.235144612428 | 170.87055409699  | 134.537040608687 |
|       | 208.878921620914 | 254.023393889525 | 235.075347885884 | 217.425223098994 |
| NOL3  | 148.477784236365 | 80.3060865378414 | 154.045685048215 | 52.6947911480086 |
|       | 55.0767527801658 | 89.5130163419167 | 71.3527183280827 | 101.560929859785 |
|       | 149.330073823683 | 73.1407519625966 | 67.0904616289706 | 66.8026147385682 |
| NOL4  | 39.3100256336821 | 44.4639405506967 | 42.108130037421  | 42.281606728072  |
|       | 45.8669209716694 | 50.7516773099639 | 42.4493032770053 | 44.0390019242862 |
|       | 41.9635525160083 | 47.4534495228738 | 44.3440839686558 | 38.7012264805355 |
| NOL5A | 212.483538335553 | 306.294404016622 | 290.087040648659 | 194.570513601724 |
|       | 677.855726232203 | 331.762920362224 | 435.632247999054 | 214.691909801388 |
|       | 184.50283792606  | 179.767874494671 | 228.933483421328 | 218.217851814655 |
| NOL6  | 209.860757709908 | 187.086662645246 | 167.319747725488 | 149.629940171074 |
|       | 255.047622225942 | 122.203872796773 | 182.37433006793  | 426.933064567744 |
|       | 174.985336606027 | 253.841638589385 | 293.516547661658 | 190.375732394043 |
| NOL7  | 1506.33570635551 | 1395.33665255999 | 1252.94510628089 | 1250.15619347362 |
|       | 2126.41018877615 | 1111.89793143647 | 1275.78715071615 | 1430.73068989193 |
|       | 1855.0119962662  | 626.390544175817 | 853.947671456736 | 1129.19103016599 |
| NOL8  | 149.515611848932 | 127.398722392954 | 84.8948024208923 | 145.791398829369 |
|       | 135.829530518199 | 151.36347984261  | 106.5477041881   | 114.113460279317 |
|       | 108.156702405177 | 104.557637353314 | 106.049736669661 | 131.990661474974 |
| NOL9  | 51.5033727579864 | 73.6036945547683 | 60.0856496605043 | 61.8997157694697 |
|       | 67.9032387662129 | 62.4450952595811 | 70.8835636550472 | 63.0748373122119 |
|       | 49.7336769474446 | 53.7196173866021 | 57.8991270166934 | 56.8534370691413 |
| NOLA1 | 208.743876555152 | 295.312692092025 | 201.427008153788 | 188.811171804746 |
|       | 312.154320305976 | 212.92335057985  | 288.190015621249 | 331.239629083778 |
|       | 293.300203370043 | 214.484877083166 | 217.456127221867 | 256.302432791187 |

|            |                  |                  |                  |                  |
|------------|------------------|------------------|------------------|------------------|
| NOLA2      | 173.511692216696 | 170.172720177618 | 242.190059393491 | 143.822560762049 |
|            | 301.139592414061 | 219.291627770586 | 276.321098534247 | 260.85727391155  |
|            | 263.53897660224  | 185.395460281034 | 206.768099707991 | 253.683753201667 |
| NOLA3      | 1564.55598228713 | 1370.76188322111 | 768.888528247493 | 2474.22199172028 |
|            | 1891.37245670852 | 947.656220635965 | 1638.16317738035 | 1245.45371155527 |
|            | 1582.45600339543 | 762.855719373733 | 1026.51177853708 | 1390.12380748446 |
| NOLC1      | 91.31756001203   | 158.225884127529 | 128.436305192918 | 116.953646515589 |
|            | 238.338646661062 | 130.865421554474 | 188.750770811584 | 131.537639104397 |
|            | 132.098298410135 | 66.7299966077909 | 83.5895816521251 | 113.7763650775   |
| NOM1       | 42.2455707947223 | 40.5400384479766 | 40.0998167098057 | 39.3750969348308 |
|            | 39.4693871570028 | 41.6590564937735 | 38.1793598983615 | 43.6753843488695 |
|            | 40.4997186069494 | 44.6235437216725 | 42.2618615571566 | 41.3481355128089 |
| NOMO1      | 129.580254143964 | 188.912691033518 | 260.766438659762 | 139.218017862207 |
|            | 201.145927216439 | 132.985150338484 | 142.273273748244 | 125.265619075038 |
|            | 182.49650467392  | 83.5742879296932 | 110.09868737254  | 103.64431747876  |
| NOMO2      | 247.356027979377 | 298.252355588344 | 432.001201940414 | 320.038347979923 |
|            | 296.271895016431 | 173.328468320432 | 236.307055572306 | 261.470129378265 |
|            | 349.90835241442  | 173.236617176892 | 209.099378471892 | 178.323615832679 |
| NOMO3      | 50.1533437545239 | 76.5411379733694 | 82.1344514651393 | 48.856176220627  |
|            | 84.0996028277101 | 46.8954576545929 | 67.5206810636627 | 48.4670130605028 |
|            | 63.7046039657949 | 37.6383530120621 | 40.3452320167286 | 57.0524725494273 |
| NONO       | 662.041552795049 | 740.423874031773 | 617.539783972955 | 487.261132702908 |
|            | 688.168272082335 | 634.226367147025 | 964.268294825556 | 691.132727131746 |
|            | 982.428740433235 | 722.200727623647 | 632.019639546131 | 651.621028098039 |
| NOP5/NOP58 | 107.034189847828 | 138.655669174533 | 129.179537795204 |                  |
|            | 104.99788782377  | 188.120766710975 | 134.239606718101 | 118.483499958227 |
|            | 150.405742308999 | 148.558544568518 | 106.897106266912 | 110.440072569721 |
|            | 123.776666209502 |                  |                  |                  |
| NOPE       | 77.2643026985097 | 54.0831732545644 | 41.4613628725541 | 73.1447139654971 |
|            | 60.4684603480369 | 84.6435656850129 | 38.977631784251  | 54.0507720792049 |
|            | 40.9460396298042 | 70.7805103907761 | 56.2708028789254 | 53.3904307221902 |
| NOS1       | 52.109723558511  | 42.8542642792862 | 38.5045333213784 | 36.1562979552173 |
|            | 41.1868052124344 | 39.2985791324641 | 41.706879587091  | 40.831207953647  |
|            | 40.2274522635576 | 39.0648733099061 | 39.0550139257658 | 42.4607795638552 |
| NOS1AP     | 45.3872406432794 | 41.8848959280916 | 48.3847843498476 |                  |
|            | 42.1273928203021 | 43.844855336215  | 44.9896851005259 | 48.6395795163502 |
|            | 44.293922970134  | 37.9273653326866 | 50.6486940895674 | 44.0409178714232 |
|            | 46.7182294568603 |                  |                  |                  |
| NOS2A      | 51.9819543312733 | 43.4396866157171 | 43.0016969050339 | 41.2567470068038 |
|            | 43.9937687851164 | 41.554942319225  | 76.6571453659046 | 41.5817737564592 |
|            | 42.8036731479932 | 38.9271399577966 | 39.0905363288848 | 40.9058811573481 |
| NOS3       | 81.537796828766  | 96.5102825310977 | 167.229755109155 | 134.394743648475 |
|            | 91.5258329186709 | 122.15017220566  | 59.5205055437765 | 66.4207938873541 |
|            | 61.1022920882065 | 51.2318935933116 | 76.7063975550116 | 55.3563533836982 |
| NOSIP      | 232.553783060082 | 343.591727067749 | 386.170232791927 | 436.35723605534  |
|            | 471.446000105333 | 461.720988147862 | 410.402285012885 | 487.261132702908 |
|            | 672.515393219419 | 357.839241226513 | 408.216955625565 | 318.846373031568 |
| NOSTRIN    | 79.8844295847317 | 82.4362183543935 | 179.186381381821 |                  |
|            | 143.822560762049 | 65.0605897122361 | 134.113913870501 | 47.5963750520409 |
|            | 87.6435494489518 | 56.0496524902806 | 90.0767501615808 | 143.173898886465 |
|            | 88.8330881965986 |                  |                  |                  |
| NOTCH1     | 209.138751343454 | 240.58403560014  | 423.896735383118 |                  |
|            | 273.460165751162 | 263.125290391542 | 205.051252996628 | 130.890690835631 |

100.813818453306 211.390987205942 375.980135105055 307.394333843045  
 251.2365884576  
 NOTCH2 51.3511088648386 46.4136802014079 43.1709743883785  
 67.9922604709859 43.1833429589719 45.8844325913247 53.593974682612  
 48.4670130605028 47.8374975107249 48.0211752672327 45.7873395324682  
 50.6333236213666  
 NOTCH2NL 44.5732978059923 44.1519466943185 47.1719672813096  
 46.6986977330569 43.6782245625941 46.3150221024046 40.8617699346501  
 42.1887890806988 46.3203995372658 40.2601451506332 43.5367669381526  
 42.8864415494484  
 NOTCH3 305.735573572576 431.018580441405 532.043503787542  
 160.853643241489 266.865951970965 158.843766201769 169.859588818306  
 254.322611819303 254.112875195524 245.0324923457 207.957319374194  
 153.42135363926  
 NOTCH4 89.1632548302738 122.849949163123 196.228284571015  
 102.483081702338 89.2285288333749 82.7269382676336 68.673864919178  
 84.7642634532073 48.6494451061637 70.5704019848974 72.544822622412  
 74.8170892324966  
 NOTO 45.4799270968969 42.8542642792862 43.5710871617107 45.7397504535169  
 43.2484996523549 45.7300501624017 42.9803717121865 43.5544347011646  
 42.0621425894624 38.957687788868 41.2598458726002 48.0350549043063  
 NOTUM 44.0707087774725 40.9731067463382 40.8420925848403 41.7614975630362  
 40.6308525754377 38.2293008890613 37.9946685306274 40.047314525032  
 41.5296458719756 44.1861590259178 47.6884372645373 37.7315666632629  
 NOV 49.4151347850687 55.2893984191264 56.1434024065079 70.506090074243  
 47.4548471240051 58.6439719071099 39.4600924554505 52.5098795466615  
 66.1448688879431 51.1169368198437 52.4393177875001 49.5539622682049  
 NOVA1 40.9141850646578 40.6380495994768 41.6550823405646 39.0156305603334  
 39.2968590261598 53.0290605707162 40.6750540874299 38.5086872173449  
 36.8127605061228 40.8970401536578 43.6919270353542 41.9430737035925  
 NOVA2 41.7397731376692 43.0227387991135 42.9104454767916 38.8495095797881  
 41.5668884168669 43.7630587657205 42.7431359850339 45.0972184964705  
 40.9901805728485 46.441301934328 45.9104478407175 44.3521099857368  
 NOX1 50.1533437545239 42.4715575796089 41.3366779545815 41.2567470068038  
 40.2449343247539 40.5710637884029 44.4639405506967 39.7895019754152  
 42.357910063876 40.0514069727124 40.7776803630095 42.0778399888414  
 NOX3 46.0920218698606 40.0527893189096 41.6079958749402 42.8235313007746  
 45.5809132232681 39.6251842352088 42.8684958525042 43.4544762830742  
 41.1742244762318 42.8936990772838 38.2795150354677 39.5418280570561  
 NOX4 147.033637977077 63.7721358300879 66.9239565096247 84.8948024208923  
 62.9553576299033 111.877209777434 46.9929836306816 72.2610650652674  
 48.2123120250343 107.722626390174 61.1801493883012 96.2739664178142  
 NOX5 39.8662795144616 38.9338521051669 37.9482157381008 37.651298468202  
 37.7576900881741 41.554942319225 36.8369172900902 39.0620487644635  
 36.2733735494625 38.6454098044474 39.0550139257658 34.5633623842083  
 NOXA1 165.107387190373 94.8036856848998 75.4317740345967 47.2009420656854  
 76.1293960715431 77.554620469891 80.2289541115146 85.7732262204681  
 91.8414653633828 128.952325188088 162.143245260314 106.99628036922  
 NOXO1 40.7609952437622 43.9063490244748 46.8267540220952 43.3744503319109  
 39.2608760193011 42.911855821602 47.3761398201373 43.5544347011646  
 49.32293280121 39.4012855594431 44.4284622926444 45.8546719310325  
 NP 1031.94541988402 180.255771684507 297.475572902965 515.856807472321  
 293.883582116334 259.769260154253 194.469250918013 242.932905246176  
 236.374695859748 102.771611905219 101.434947182387 233.07404514708

NPAL1 36.0144420013819 88.1886407127943 71.4473248804357 38.8495095797881  
64.4999048115671 41.9543948167375 84.1780237893807 195.376772135023  
45.5779686360641 80.3915591207869 96.6969760559963 53.655233033193  
NPAL2 47.3791873993182 54.9392038576957 56.1434024065079 41.0726336841311  
54.3554233228353 47.2505395290129 48.3411413510851 49.0145368354835  
56.2132652469187 54.7827221235949 48.5292718280498 47.5025821041537  
NPAL3 107.637618676176 210.5650813431 137.034037711549 111.703187941409  
107.770004093887 79.2701322339022 120.401643722713 171.957278903005  
92.8206287414481 154.149426842591 129.236597599908 143.233722839451  
NPAS1 54.5358897781765 58.3164247463092 45.310660704531 42.9358255168086  
49.7235523248653 45.2852528185486 42.4939802311136 45.0972184964705  
57.3385421837183 51.0055825931636 51.7538628098347 42.357910063876  
NPAS2 78.0020909283414 180.648144492464 99.7403508491191 53.8086134112366  
102.372855708929 56.2736599756843 78.3082773071531 113.064858029749  
117.976703022492 228.907776306695 198.497745548245 215.609821689043  
NPAS3 39.721757876562 40.6380495994768 40.301483914446 39.3750969348308  
39.3100256336821 39.9397419279057 39.7576136507593 39.6910816302609  
37.1540615254024 36.634024014558 40.1742127891824 40.2193186091351  
NPAS4 46.7293238583888 47.765848710116 50.7502704822135 46.3203995372658  
39.0564222526273 68.0501900087917 37.4772922422734 48.5681478665796  
47.3791873993182 58.8022152133979 60.2867996701867 48.27609330316  
NPAT 50.4872122867759 69.7855392178808 65.7670524353661 92.084526929319  
63.0383605052305 63.2343637481705 72.4651758215622 55.421880601441  
51.3511088648386 58.9836017745712 67.3976855661302 52.2832912331043  
NPB 45.2875173643252 42.6939394537076 41.0356368374708 43.1847628331565  
62.3233491851723 45.3882138838137 54.0170817319522 60.419911425109  
37.8319142847141 46.0119912782855 45.9104478407175 35.8429598823818  
NPBWR1 35.7012997405508 38.4330755397458 38.0452862258803  
40.1804147506786 35.9058393060637 36.2768299545794 41.1507980856436  
36.3405039629059 39.9444191873552 39.9948390976317 30.493888765264  
44.1452943804044  
NPBWR2 40.7609952437622 48.3699741879723 45.310660704531  
34.3595588146954 46.9906120932727 41.554942319225 47.8947595316832  
45.642304356051 46.6944238390932 51.8412522234186 44.2925355984056  
41.4508241771315  
NPC1 377.76338037467 132.24963384417 166.834334710682 680.279119780451  
119.72858253254 153.279284223069 111.714563124738 159.603518169388  
188.236842521312 120.837993273922 122.738749904222 175.085270395769  
NPC1L1 43.7585538437696 36.4002279956519 44.7829632472754  
42.8235313007746 43.844855336215 42.9695585740813 44.2166118829877  
37.6557714476853 43.4656637536244 47.3791873993182 42.5426057453993  
39.3575468494941  
NPC2 6938.87250165681 1969.8871504719 3244.27810937143 6186.45345364665  
2280.42953098693 3761.48462220262 2733.80542760533 2865.25344854768  
3884.2191293028 4381.51418239047 3379.67054115975 3905.8371644287  
NPCDR1 45.1912496459517 46.5650556481721 48.2883694323339  
41.4273122914951 44.9936360641969 45.8325181856483 45.6042625176633  
49.6203214143464 41.9635525160083 42.1622837416589 52.2229654768933  
47.2131144508464  
NPDC1 94.1967497986791 183.165559564289 99.5531381996521 74.6159297822533  
101.549779766678 147.945429978177 40.7910160811527 89.7184505543918  
67.8208976798364 92.261357059727 112.13936276116 73.0333258448698  
NPEPL1 138.26207427245 289.213144287085 379.377005627283  
158.66112269515 375.757961593064 216.194306146777 211.669885749793

375.529704925121 168.883366756191 270.487135967976 245.356135592468  
 182.188883821722  
 NPEPPS 102.610376474754 90.9202199678627 88.4897895318663  
 85.7013212907541 91.7629175712824 95.750422489231 81.5926902505707  
 74.6572522248684 116.891649452816 93.8630393470857 86.0100701849272  
 138.538868572598  
 NPFF 38.7537364570873 40.8880530359822 44.4311655729487 41.5464765641928  
 41.1868052124344 41.554942319225 38.6243997507646 39.1652965788406  
 46.2027193115397 44.1379638573455 46.7386599624801 45.5800840647989  
 NPFFR1 40.9558083259517 38.8336427948187 41.0356368374708  
 41.1886975241176 45.8051846088552 37.0180934800573 35.3362091871364  
 42.6450179841129 40.5912213523345 39.8873706855774 41.5421429082231  
 40.1700117452801  
 NPFFR2 41.7397731376692 44.7829632472754 37.2838080935695  
 39.4637566422506 38.5185220021014 40.2033449684952 44.797320243931  
 40.9808244695721 59.4236178078244 42.1151315286226 41.3277288245157  
 41.3012916486748  
 NPHP1 44.0328992213727 40.7623977968067 44.3648993568405 41.483412492426  
 44.1090410923866 44.8872784170036 41.4417765092034 44.4031868028216  
 42.8542642792862 43.3465699185405 43.3577635773132 45.9104478407175  
 NPHP3 131.859371655356 81.6529991377083 112.421316052392 68.0471049167726  
 78.5141640924736 103.242926669137 76.8788592884109 72.2610650652674  
 82.3364971911816 133.720493104769 133.192618821838 153.569831699238  
 NPHP4 69.5853093594169 80.4060693489113 82.9995913411894 61.6608323085662  
 93.3605294458382 67.1278109419819 62.6236991757723 72.0334593545916  
 63.5716064500377 51.173096357454 55.0404566626821 53.2046867327331  
 NPHS1 37.9387791625384 44.6918600441328 46.0727230219512 42.5664883002833  
 40.0599807618105 42.5660695551615 41.1507980856436 45.9604707098953  
 45.8325181856483 43.6033221838149 45.310660704531 41.4508241771315  
 NPHS2 38.7537364570873 48.9259041798949 37.8386378737561 40.4359177791566  
 41.9842695818285 46.4648868771662 45.4799270968969 50.1833483241864  
 43.3744503319109 48.6124127998952 53.2083147523758 40.4639532172338  
 NPPI 205.772128732705 217.263889616995 183.165559564289 155.693953208351  
 180.398903465014 275.811139268285 126.826715174564 196.065114892186  
 118.93749473833 151.175959542368 144.546897317106 126.753713093485  
 NPL 106.027997253013 82.6116645182046 127.051878502711 305.619340338331  
 88.7461361855771 106.951862149262 108.147548794301 88.3335649692467  
 86.7730065232892 94.3329263062576 88.6771566133367 120.73773749436  
 NPLOC4 159.797219482154 123.768417863139 119.434418653131  
 114.224091812993 129.917299534089 107.309776354951 139.620154641549  
 123.908152883436 153.812414753676 157.906415100288 141.79653024085  
 114.537682317715  
 NPM1 42.5193208629123 41.3610369241157 47.7737810047679 45.8844325913247  
 44.7829632472754 44.0804700754786 52.2476631126873 42.8482181313226  
 45.3756389170606 44.1379638573455 41.0808257270221 43.8575940017119  
 NPM2 42.442231667357 45.7979032939211 45.5883690965192 41.6564075217517  
 53.3086645804786 45.8325181856483 45.223075311113 52.0503062610092  
 49.3780606970538 60.399253022569 52.4393177875001 45.0985088502363  
 NPM3 302.465485470899 250.621261212308 282.961489041903 201.027801320306  
 779.333013700435 327.36921955924 354.158105175308 346.844545554188  
 252.347641176529 270.756849919679 288.386446189379 353.213447404132  
 NPNT 38.7537364570873 42.1607322031054 42.9104454767916 42.2496337895968  
 46.8674366115656 38.3418933808844 37.7136011474903 48.272324215504  
 44.8997235283254 36.0481934423077 41.6336636285875 32.2133093774284



|       |                  |                  |                  |                  |
|-------|------------------|------------------|------------------|------------------|
| NPPA  | 39.0620487644635 | 41.0678614026819 | 34.5718473203083 | 40.0698728584484 |
|       | 44.0451487108213 | 39.6251842352088 | 41.253645578517  | 42.0494116081998 |
|       | 46.7760357462635 | 47.4767851750188 | 45.6348103033479 | 43.0930293831497 |
| NPPB  | 42.6036491382658 | 39.7835513496873 | 46.8267540220952 | 43.1847628331565 |
|       | 45.4751076037511 | 42.0574848021044 | 40.4359177791566 | 40.1474543172332 |
|       | 40.9901805728485 | 40.2112371512838 | 42.0750889188255 | 43.2776458914333 |
| NPPC  | 41.5421429082231 | 38.0226905622357 | 42.157627240486  | 39.9697332660833 |
|       | 44.9936360641969 | 48.7781962164988 | 45.1017494688414 | 44.9977782988116 |
|       | 44.5303781239209 | 46.1390887492649 | 40.547835538778  | 46.8129509799753 |
| NPR1  | 39.8662795144616 | 27.8771969777627 | 40.0998167098057 | 38.0958223740111 |
|       | 37.7576900881741 | 34.2773859804062 | 39.8695929627783 | 38.3684202018524 |
|       | 38.9006788676407 | 31.8890957468737 | 37.3687900733549 | 43.1805016690297 |
| NPR2  | 66.1229691315616 | 62.1913948207302 | 51.371775055873  | 51.6869155634183 |
|       | 64.6835308827804 | 68.1969125201241 | 57.2107492415265 | 55.9303347977781 |
|       | 48.2123120250343 | 71.5948944013406 | 65.8028755495823 | 72.2720428359203 |
| NPR3  | 37.1485601150873 | 35.1224289925572 | 36.0306975524309 | 39.066284740632  |
|       | 44.6834648302383 | 38.2293008890613 | 37.6036146841933 | 38.745552403895  |
|       | 42.6366765186182 | 43.0919221375514 | 43.1931731665131 | 44.7401523707775 |
| NPSR1 | 49.3854238365325 | 58.5406981871153 | 62.9313387640547 | 49.6314545328943 |
|       | 48.6707521528908 | 49.1495645678651 | 45.2806199505029 | 44.1311654985682 |
|       | 49.32293280121   | 69.2264156614892 | 65.6010220593397 | 45.2783024981315 |
| NPTN  | 529.650395907046 | 515.007705025879 | 313.594031411352 | 478.110586929303 |
|       | 413.918050849658 | 488.277500837251 | 329.120125961774 | 438.22469176123  |
|       | 505.650842529816 | 792.022171185649 | 717.997180920384 | 701.935442033195 |
| NPTX1 | 39.5676051939342 | 42.0709558258414 | 39.0516158090705 | 41.3027031037343 |
|       | 42.6022652963326 | 58.0353195691931 | 36.3604951341921 | 62.0347191940821 |
|       | 41.7276061666996 | 45.2556760873335 | 47.0940613507321 | 40.3295323726475 |
| NPTX2 | 117.20232751191  | 76.4439037944547 | 351.883708151967 | 104.99788782377  |
|       | 90.9521112485099 | 62.9688525319822 | 44.9863726205428 | 53.4109882045447 |
|       | 48.9931786790166 | 59.1496467460507 | 71.0369238830779 | 67.4197263416701 |
| NPTXR | 80.5437011468815 | 44.2105195734073 | 47.0940613507321 | 46.3203995372658 |
|       | 54.802736966312  | 49.9699131196797 | 58.0969258817391 | 97.5962784863854 |
|       | 55.9423752286714 | 50.22432299342   | 66.8842530423095 | 56.1136936405786 |
| NPVF  | 34.3473914754963 | 36.1232327599945 | 45.2313723727673 | 42.0102671859606 |
|       | 41.3755760434934 | 35.7034203372528 | 36.4098694708483 | 41.3506832276112 |
|       | 41.6616444147804 | 40.2112371512838 | 35.7953070087288 | 40.1700117452801 |
| NPY   | 42.6036491382658 | 33.5924201549249 | 46.9040704638073 | 45.7397504535169 |
|       | 41.6806984441849 | 39.2248354955045 | 36.634024014558  | 40.931294690669  |
|       | 36.3649677956953 | 39.7835513496873 | 46.6442692119997 | 44.1452943804044 |
| NPY1R | 38.304249186058  | 39.1982470626863 | 44.6032218589199 | 38.4208429103799 |
|       | 46.0043807840705 | 44.9896851005259 | 37.3799542961839 | 42.5435283762933 |
|       | 39.9444191873552 | 42.4594149893798 | 37.1059647239814 | 39.8497227447888 |
| NPY2R | 46.441301934328  | 40.9731067463382 | 39.6451483836089 | 42.357910063876  |
|       | 34.2638875325204 | 40.4359177791566 | 39.2533668167483 | 41.0381860307445 |
|       | 44.3440839686558 | 45.5776159432079 | 44.0409178714232 | 41.0657892043496 |
| NPY5R | 41.5689645295284 | 43.0782257865587 | 39.5450079747895 | 40.8084239472012 |
|       | 41.2740822675592 | 43.1180113655693 | 37.5469247328848 | 36.8982253308785 |
|       | 40.6503965580437 | 41.2700204291848 | 40.547835538778  | 40.1700117452801 |
| NPY6R | 46.441301934328  | 42.7775752471711 | 42.157627240486  | 45.7397504535169 |
|       | 42.4864576619427 | 56.8505380943422 | 43.4544762830742 | 52.8622615027833 |
|       | 43.3744503319109 | 45.1569741609597 | 47.8284278211109 | 46.8129509799753 |
| NQO1  | 193.364522980854 | 491.8684831079   | 298.988745247509 | 55.5276281380084 |
|       | 150.649377863375 | 190.348435737155 | 415.906208143859 | 701.935442033195 |
|       | 148.770228614661 | 136.140128421585 | 173.711189659585 | 150.011814577972 |

|         |                  |                  |                  |                  |
|---------|------------------|------------------|------------------|------------------|
| NQO2    | 67.1387898740161 | 54.4190527512508 | 53.8724557170772 | 92.084526929319  |
|         | 55.1563703466328 | 108.246687420741 | 80.0733119200914 | 53.838484549134  |
|         | 116.17887995398  | 69.7729022157455 | 59.2106652388061 | 67.8335962843732 |
| NR0B1   | 41.0608773166058 | 43.1805016690297 | 38.5045333213784 | 42.8235313007746 |
|         | 38.5512429290626 | 47.2009420656854 | 44.0687697278114 | 48.4670130605028 |
|         | 40.7847110517594 | 36.3612409063792 | 41.0050831223107 | 43.4709415392696 |
| NR0B2   | 35.1307934330047 | 39.9697332660833 | 40.931294690669  | 39.7411455670172 |
|         | 38.1644569189523 | 41.7627910693483 | 39.6535880152834 | 42.4580504587581 |
|         | 42.0621425894624 | 40.7063426028871 | 41.5421429082231 | 37.8490162439785 |
| NR1D1   | 44.0328992213727 | 37.5469247328848 | 43.0971787292711 | 41.6564075217517 |
|         | 40.8873907150245 | 43.2805590023412 | 44.0687697278114 | 40.3357777530419 |
|         | 45.2897806651929 | 48.3693338695392 | 44.9713479185144 | 53.2046867327331 |
| NR1D2   | 46.3884811643547 | 66.0846162445352 | 59.5444359507702 | 59.8102324370568 |
|         | 64.9725753882126 | 58.4435847520801 | 60.3928833351886 | 50.563951934942  |
|         | 71.0211264570699 | 62.5528124447176 | 69.652475454588  | 67.5047089908724 |
| NR1H2   | 169.168332370229 | 228.933483421328 | 213.232693288132 | 347.145902252055 |
|         | 200.450523205251 | 342.475405815033 | 188.887559923238 | 132.007307754378 |
|         | 305.959643033169 | 250.131114907793 | 264.407051461506 | 219.238235572894 |
| NR1H3   | 165.496075703734 | 115.087963545095 | 315.696895080135 | 293.040690378216 |
|         | 187.672799470683 | 209.214729757636 | 138.923143963742 | 199.480636964499 |
|         | 146.355277438643 | 682.35345164708  | 641.103199748891 | 618.892379887961 |
| NR1H4   | 39.9697332660833 | 46.3635803515159 | 36.8730514568925 | 41.3027031037343 |
|         | 49.5666074434383 | 55.540888910486  | 88.8039637390786 | 53.2046867327331 |
|         | 50.6750785584772 | 66.8026147385682 | 76.7063975550116 | 83.7829283976292 |
| NR1I2   | 40.8681871019812 | 41.5061991514748 | 37.6557714476853 | 38.9534635879195 |
|         | 42.2510526338368 | 38.7658621977098 | 40.3662560853635 | 39.4710743516517 |
|         | 43.331653186429  | 37.8490162439785 | 40.3452320167286 | 39.8845726397282 |
| NR1I3   | 43.8582747295766 | 41.3277288245157 | 42.4890076400051 | 43.5627649099623 |
|         | 43.4885245598939 | 39.0266821712099 | 35.668043946649  | 42.6450179841129 |
|         | 43.4656637536244 | 49.0841460667818 | 46.201352759435  | 42.1860813954352 |
| NR2C1   | 62.8315857560764 | 76.5411379733694 | 92.1646038105091 | 62.1776700757427 |
|         | 75.5799609581534 | 71.5249259772583 | 69.9214859673839 | 76.2876332597671 |
|         | 88.9189119296399 | 66.4265295487942 | 67.1108025189303 | 71.5249259772583 |
| NR2C2   | 54.691568065544  | 84.4596873416863 | 72.4913548133238 | 95.3070802596041 |
|         | 93.4726264307041 | 60.4991141099239 | 120.582525405708 | 124.605379715077 |
|         | 73.967017874248  | 63.6197695952215 | 60.6505672212119 | 62.3997407955361 |
| NR2C2AP | 155.435700005184 | 132.946528291039 | 109.979856686854 |                  |
|         | 74.4365426051588 | 225.389113475883 | 101.693848821246 | 238.077051775147 |
|         | 188.408367998553 | 174.559216176175 | 149.59360999995  | 122.588326913328 |
|         | 129.091447141381 |                  |                  |                  |
| NR2E1   | 43.3098985178373 | 41.7614975630362 | 42.9641759692926 | 40.3691324547049 |
|         | 47.2074332636566 | 42.357910063876  | 46.5650556481721 | 52.6654109976514 |
|         | 41.8197029429821 | 42.3606390470387 | 42.4162492820012 | 49.0655215909632 |
| NR2E3   | 43.7783560914188 | 41.6466169548846 | 40.9861485852278 | 39.2780515621926 |
|         | 41.5335058664597 | 43.4215162178364 | 42.920675777463  | 41.5817737564592 |
|         | 42.5750559787101 | 41.9219580093938 | 39.0550139257658 | 40.0124413244394 |
| NR2F1   | 53.8856501960117 | 96.577572948724  | 59.0308764112247 | 91.7068354379889 |
|         | 133.594952879573 | 166.572463787763 | 44.9863726205428 | 63.4570909617664 |
|         | 57.404059248727  | 97.6023731094756 | 197.232697438521 | 71.5836731059913 |
| NR2F2   | 73.7133884699889 | 133.742988105942 | 99.8906210560132 | 62.1776700757427 |
|         | 134.62138052303  | 139.693327116993 | 73.6855877240541 | 82.8652108020571 |
|         | 104.288073521816 | 95.7125018118399 | 102.655050997714 | 95.8149149211251 |

|       |                  |                  |                  |                  |
|-------|------------------|------------------|------------------|------------------|
| NR2F6 | 360.15483218921  | 523.25106120389  | 416.323909993454 | 76.0975301977715 |
|       | 484.218958528411 | 140.744765497063 | 289.05213385509  | 283.563531065269 |
|       | 494.162646055732 | 275.611524861938 | 301.457545514208 | 210.255784687052 |
| NR3C1 | 47.6061120397122 | 45.5650849824985 | 45.5883690965192 | 52.3904937669701 |
|       | 43.5880694884799 | 50.0445602878169 | 42.57175366709   | 48.7213586071409 |
|       | 45.0589947942306 | 44.8522313252892 | 50.7530841767125 | 45.2265319826548 |
| NR3C2 | 62.5036823572932 | 44.6388394563024 | 49.6978906361694 | 39.2406797798509 |
|       | 43.5836473788312 | 98.6108785181637 | 44.3440839686558 | 48.87875862356   |
|       | 53.5847837163876 | 103.14577985944  | 82.9518449339163 | 69.2213838763756 |
| NR4A1 | 42.0532901689036 | 58.5406981871153 | 41.2747736315207 | 46.4091752823403 |
|       | 45.6895223823001 | 74.4508307047509 | 47.4439407315335 | 58.3702889417801 |
|       | 42.3060097375421 | 45.085108274505  | 47.7052132264218 | 42.7205719491357 |
| NR4A2 | 92.3659612653822 | 342.829992044257 | 60.2528550551807 | 601.139894733857 |
|       | 141.852330109472 | 235.764999941441 | 137.239944506217 | 433.637087338002 |
|       | 53.2046867327331 | 113.873117749074 | 64.3824529624475 | 147.579873410455 |
| NR4A3 | 49.7827734675743 | 117.474987556447 | 41.0726336841311 | 127.051878502711 |
|       | 40.2095357724516 | 58.9676332048764 | 46.9157261716384 | 49.3301895737501 |
|       | 41.1238005120685 | 42.0621425894624 | 53.2016900452035 | 44.2930906044601 |
| NR5A1 | 41.3387790895716 | 42.9358255168086 | 42.4580504587581 | 43.1847628331565 |
|       | 43.844855336215  | 46.574682061365  | 45.4799270968969 | 42.0494116081998 |
|       | 47.5564423692142 | 44.571915452417  | 41.3553369544097 | 43.1805016690297 |
| NR5A2 | 43.5192040269973 | 46.4136802014079 | 58.568646851882  | 47.7319077282024 |
|       | 42.4864576619427 | 43.5474493120701 | 38.7337086062875 | 42.1812299265547 |
|       | 39.6345710603047 | 40.5544182411001 | 49.2934904960601 | 45.6692241948108 |
| NR6A1 | 40.3478825593224 | 40.9731067463382 | 42.9641759692926 | 38.4699622716254 |
|       | 41.5668884168669 | 37.7427315853995 | 41.1507980856436 | 42.6022652963326 |
|       | 40.2615278292875 | 40.2493681589104 | 40.9683275553869 | 43.7672102682067 |
| NRAP  | 43.3098985178373 | 40.3946758935842 | 40.4070046183108 | 46.614092935749  |
|       | 44.9384441371181 | 38.6704566269103 | 38.941855825269  | 39.4223544019653 |
|       | 41.1742244762318 | 42.6366765186182 | 39.4749602565407 | 40.4639532172338 |
| NRARP | 46.4732328055735 | 46.6996902348633 | 53.2735797144627 | 40.5484717678957 |
|       | 60.6734048807953 | 46.6872654833579 | 40.6750540874299 | 43.3262148375525 |
|       | 42.4540072551568 | 54.6089451252049 | 49.5462425809174 | 47.3172462673426 |
| NRAS  | 150.829277770546 | 126.492854172749 | 145.405415337402 | 197.540681021755 |
|       | 158.918242816842 | 134.922819713509 | 134.713725350463 | 139.062073456923 |
|       | 126.63987648161  | 86.7076796107636 | 86.3374157614394 | 136.20629436945  |
| NRBP1 | 123.739272396278 | 68.5251167137806 | 87.3634135323569 | 117.3417887148   |
|       | 74.5758811681995 | 95.4393274079354 | 124.965915196815 | 128.635811501506 |
|       | 114.617965877564 | 110.909109947659 | 96.2248868829355 | 70.4262478188233 |
| NRBP2 | 181.064239330482 | 185.395460281034 | 292.735673136799 | 103.961956810572 |
|       | 307.922754395377 | 212.530138323284 | 107.748050894857 | 225.120999402048 |
|       | 143.607457611143 | 221.71759246183  | 178.858202962948 | 190.548265163011 |
| NRCAM | 38.5007204246293 | 40.0145811166794 | 42.281606728072  | 44.7401523707775 |
|       | 40.6308525754377 | 37.2686490268265 | 42.357910063876  | 39.3113207075992 |
|       | 37.4059035942248 | 37.3687900733549 | 38.1253290586431 | 39.3575468494941 |
| NRD1  | 1048.98028527123 | 544.946796643478 | 551.490493022416 | 898.114119553014 |
|       | 695.255317861845 | 550.642253702646 | 576.140066807763 | 835.171475474151 |
|       | 853.947671456736 | 543.268021785502 | 592.399245288911 | 509.004054793277 |
| NRF1  | 43.844855336215  | 44.4031868028216 | 41.9273770960761 | 37.9315270017242 |
|       | 46.2448677480802 | 38.8653023707909 | 45.4061964177485 | 42.8978721487095 |
|       | 48.8584917918986 | 43.0919221375514 | 44.5891268059311 | 44.4475838947656 |
| NRG1  | 41.6354649482853 | 38.8595250583409 | 40.4882741869718 | 44.6286581923295 |
|       | 42.1650127805175 | 37.842026762878  | 41.9794946022484 | 48.8224716487571 |
|       | 40.3507923280655 | 40.2559395174155 | 40.8712065851938 | 42.6214116861792 |

|       |                  |                  |                  |                  |
|-------|------------------|------------------|------------------|------------------|
| NRG2  | 41.8833988894167 | 41.2598458726002 | 44.0451487108213 | 40.9607305725196 |
|       | 42.3536549114165 | 46.4648868771662 | 41.6466169548846 | 43.1567024035183 |
|       | 51.4111372893136 | 50.007830364606  | 54.6603683143597 | 49.3984571719129 |
| NRG3  | 35.8208542506595 | 41.8848959280916 | 41.0356368374708 | 42.0102671859606 |
|       | 44.0451487108213 | 42.9695585740813 | 36.3194282084339 | 38.956280281655  |
|       | 41.863927676552  | 44.2580151149956 | 43.6629145624937 | 41.7575097298927 |
| NRG4  | 37.3463875295726 | 58.9128486419884 | 71.7336217321663 | 39.1706564265495 |
|       | 58.1242391848692 | 45.3882138838137 | 94.6952414258466 | 45.3872406432794 |
|       | 170.750057881363 | 72.834275688835  | 67.0361353184222 | 88.0877175295544 |
| NRGN  | 47.5647821785529 | 49.6841415268611 | 43.7630587657205 | 65.084620579901  |
|       | 47.6884372645373 | 50.7516773099639 | 101.716697533604 | 72.692416146584  |
|       | 52.1788489555942 | 50.1649089793069 | 43.5710871617107 | 47.6938628797168 |
| NRIP1 | 252.775631043952 | 135.92805172353  | 204.344278991396 | 255.087214364926 |
|       | 316.419421649196 | 193.703214707909 | 374.978401470437 | 299.188277423715 |
|       | 702.737741114234 | 222.202580186782 | 235.544416908354 | 353.598144765197 |
| NRIP2 | 47.1962846565261 | 46.29198852834   | 45.310660704531  | 43.5627649099623 |
|       | 40.9950639693255 | 42.8598805316863 | 39.2533668167483 | 44.797320243931  |
|       | 46.6944238390932 | 43.0919221375514 | 39.4410515050885 | 43.0930293831497 |
| NRIP3 | 64.1882546112044 | 72.2016884438365 | 67.7235257493648 | 230.09336914921  |
|       | 51.2525124735102 | 62.0660509811111 | 186.965367827758 | 242.080992016235 |
|       | 59.0563795877672 | 60.1466326805616 | 71.2370255410834 | 49.7336769474446 |
| NRK   | 50.7390160399184 | 43.0227387991135 | 42.0621425894624 | 46.0228732507872 |
|       | 56.5933259268408 | 51.702461863489  | 47.7390230243778 | 49.2019743609873 |
|       | 44.3440839686558 | 39.4710743516517 | 45.8180710486329 | 50.7487159427973 |
| NRL   | 46.8954576545929 | 36.1232327599945 | 37.5597671487621 | 44.6905691366696 |
|       | 39.2608760193011 | 41.8613406887824 | 46.4388841354122 | 40.2382908228517 |
|       | 33.2715481910159 | 39.2623423164488 | 40.1742127891824 | 45.1735152121056 |
| NRM   | 103.657181265842 | 51.3800036046133 | 47.4740726032707 | 58.1798515131249 |
|       | 58.6481644777552 | 44.8872784170036 | 111.714563124738 | 70.355653090662  |
|       | 101.2825552085   | 70.7003843117511 | 72.909783842776  | 74.9294208313176 |
| NRN1  | 37.9387791625384 | 27.8771969777627 | 44.3344900481112 | 34.7266486944713 |
|       | 29.2731027042641 | 42.357910063876  | 44.8643898647322 | 40.3357777530419 |
|       | 62.370559099758  | 39.7835513496873 | 33.4071187618571 | 36.8690774823319 |
| NRN1L | 43.0930293831497 | 45.5842286511645 | 43.3085358214154 | 43.9282059368202 |
|       | 45.9104478407175 | 44.5544727111028 | 44.8643898647322 | 42.7431359850339 |
|       | 43.4656637536244 | 43.0919221375514 | 44.0409178714232 | 45.0035308952466 |
| NRP1  | 125.62281563325  | 73.9376772899278 | 108.806649898122 | 168.426372075344 |
|       | 73.1215732923523 | 116.900364583878 | 77.2154078285418 | 95.8002081462966 |
|       | 40.4220196471124 | 63.0119737420787 | 90.407200101342  | 80.7462144785541 |
| NRP2  | 41.5642318005046 | 43.0971787292711 | 40.7256433650856 | 43.006072841282  |
|       | 39.3667161654772 | 45.0241191707651 | 41.5479731143507 | 40.1005188910831 |
|       | 42.1046072075724 | 38.2599935139101 | 38.0378917280418 | 44.6974107947084 |
| NRSN1 | 42.442231667357  | 41.2598458726002 | 44.8872784170036 | 49.3654837541353 |
|       | 43.2484996523549 | 42.8598805316863 | 40.0052661202207 | 41.4508241771315 |
|       | 42.2577689927563 | 42.785429206422  | 41.4508241771315 | 42.0424641526302 |
| NRSN2 | 75.5751205142867 | 66.9524703393018 | 70.3613168347492 | 152.880772824839 |
|       | 59.0965219753805 | 103.734064904898 | 154.811704749343 | 85.9474373829081 |
|       | 62.5542376788358 | 79.4916415027015 | 91.036114822363  | 81.1189042503645 |
| NRTN  | 53.6741873729867 | 37.920964499903  | 43.5710871617107 | 38.4208429103799 |
|       | 56.0477607422828 | 73.3506594385504 | 40.2154497375715 | 42.9301944191913 |
|       | 44.8997235283254 | 52.2256177934134 | 53.9517841438975 | 48.0350549043063 |
| NRXN1 | 35.0496718523759 | 40.3384318592985 | 40.0599807618105 | 37.29566077996   |
|       | 39.859345745831  | 39.4469765850607 | 37.0564573649223 | 37.7315666632629 |
|       | 38.0213051227859 | 39.2010256871265 | 37.8618631269419 | 40.6134262962375 |

|         |                  |                  |                  |                  |
|---------|------------------|------------------|------------------|------------------|
| NRXN2   | 46.263826584899  | 42.5660695551615 | 48.7646976789783 | 47.2009420656854 |
|         | 41.7929491793697 | 96.0907205856398 | 38.5474297403025 | 48.6441988290952 |
|         | 42.1594905198929 | 63.9129423266349 | 63.1944558106132 | 49.1200355938198 |
| NRXN3   | 40.5289532121417 | 39.7453420559776 | 43.0697338561114 | 39.4637566422506 |
|         | 39.0916553915607 | 41.628211174823  | 40.0557788909923 | 42.8036731479932 |
|         | 39.4397788230732 | 47.611018474151  | 40.4967168818294 | 41.9139763681346 |
| NSBP1   | 40.8091178323174 | 45.8980298854198 | 63.6334154351075 | 47.6687908290818 |
|         | 43.3896803974186 | 65.2014839770255 | 60.2938279880998 | 52.9813204449021 |
|         | 62.2097408040123 | 53.1993028936883 | 57.4078217542368 | 55.3563533836982 |
| NSD1    | 48.6621527194963 | 48.4072568263884 | 53.9256409473463 | 55.6481366056639 |
|         | 47.2074332636566 | 43.3269087731399 | 44.8643898647322 | 53.6210959113222 |
|         | 55.3122077514658 | 56.057906531592  | 50.7502704822135 | 49.1855323567224 |
| NSDHL   | 250.41086379231  | 129.925137664962 | 169.144145421022 | 165.606015336587 |
|         | 401.679080975109 | 149.249181701692 | 221.450737998571 | 232.911951245618 |
|         | 246.20973320244  | 160.868571611805 | 160.100408020768 | 130.946383858668 |
| NSF     | 208.023488988931 | 247.298165265093 | 190.675425748381 | 209.61080762285  |
|         | 196.623560874725 | 153.279284223069 | 198.821443323024 | 193.043344611355 |
|         | 278.773982275525 | 157.639656300073 | 166.847053797281 | 145.75465017845  |
| NSFL1C  | 144.711001798454 | 212.117653688186 | 233.326886009799 |                  |
|         | 157.433061993786 | 150.852183189276 | 298.14782785085  | 342.300139006451 |
|         | 171.135041358339 | 226.970981973829 | 356.826869112433 | 275.811139268285 |
|         | 222.426799131736 |                  |                  |                  |
| NSL1    | 74.7580617182649 | 94.3450965454031 | 114.78317743597  | 119.545018066492 |
|         | 93.879589378061  | 92.8006484232438 | 107.808744445896 | 85.1920126487447 |
|         | 75.5171857162768 | 74.0204513459504 | 79.9567256807679 | 73.8105012820769 |
| NSMAF   | 303.189681281366 | 578.456468865003 | 214.316246155274 | 779.996851709716 |
|         | 235.222472959869 | 258.038442651578 | 234.172977976583 | 142.309369995384 |
|         | 351.883708151967 | 372.758184542037 | 261.826480747537 | 272.663785805238 |
| NSMCE1  | 238.647490689325 | 236.10027586633  | 487.540800793233 |                  |
|         | 280.402165030951 | 352.019218177371 | 388.831358461844 | 305.873069578049 |
|         | 523.679443405512 | 233.850715388018 | 316.745819100367 | 311.585488207444 |
|         | 350.451704069255 |                  |                  |                  |
| NSMCE2  | 134.113913870501 | 118.251739134889 | 112.60230393988  |                  |
|         | 214.073500272341 | 221.417189269038 | 150.242221910229 | 128.542999559673 |
|         | 79.9597944271831 | 144.227861902786 | 116.22441634196  | 92.6230008876347 |
|         | 118.288549974348 |                  |                  |                  |
| NSMCE4A | 269.618616631857 | 541.631969808467 | 389.686780706341 |                  |
|         | 312.589169184897 | 376.215561392485 | 548.387793019855 | 536.013150313097 |
|         | 291.5513298383   | 285.322305931794 | 492.902027204364 | 527.97309138633  |
|         | 503.793770799548 |                  |                  |                  |
| NSUN2   | 609.797179957996 | 529.210992541911 | 410.808988840343 | 265.930422462959 |
|         | 488.183286350725 | 315.696895080135 | 737.604036996153 | 432.355300448283 |
|         | 435.325038193179 | 337.363827785838 | 417.331253559307 | 299.890705180422 |
| NSUN3   | 58.0139597055449 | 49.7363778831003 | 56.8595344107711 | 68.8167148906225 |
|         | 57.4163094213712 | 52.8421046802739 | 75.5830548489892 | 53.5271601314404 |
|         | 59.9770720847728 | 66.5422130374814 | 64.3824529624475 | 63.3578893149245 |
| NSUN4   | 175.632783805966 | 194.278792348966 | 184.484466722861 | 126.911056987607 |
|         | 174.752830194939 | 149.352994264999 | 186.265538054701 | 131.068763088422 |
|         | 237.632703283663 | 231.990562664196 | 279.226221967169 | 188.099292617901 |
| NSUN5   | 111.186223357396 | 105.598516887691 | 150.31039735991  | 88.5511408870489 |
|         | 173.677648729894 | 80.8983886669775 | 110.09868737254  | 111.153589230866 |
|         | 113.169111095305 | 140.698550434486 | 118.951970882732 | 86.9219526564376 |
| NSUN5B  | 104.335120306753 | 116.51037006692  | 211.964446599144 |                  |
|         | 88.3459116251233 | 198.129308943666 | 73.9456720099807 | 103.216483345636 |

114.396745444915 133.558028920419 90.4160198134865 104.02653369229  
 94.4340798026852  
 NSUN5C 89.1012752492647 95.2614267797703 169.168332370229  
 67.3779879510397 153.992331037033 60.476609295115 86.6798536307388  
 77.7615826856723 96.6833301748676 83.9976136901125 100.087328133967  
 82.7853677822046  
 NSUN6 47.7267190613906 42.7775752471711 56.7776874358774 37.7469621225553  
 35.7973685350741 42.2577689927563 45.6042625176633 44.7044140979108  
 45.2897806651929 44.0409178714232 48.9754340235127 64.0541263553251  
 NSUN7 49.3463416794995 49.0986627051784 80.0183739952818 67.1209520838357  
 48.4724651632766 45.1411314881341 78.7182388025668 51.8347877274018  
 76.5124583559262 79.7992359774565 56.1379957867124 57.6549040984583  
 NT5C 621.489785652602 590.709061039001 557.979646421047 360.668308246913  
 552.480471244789 410.402285012885 836.472724085903 415.05124917015  
 474.267141780289 779.333013700435 749.49934348018 510.525676243746  
 NT5C1A 35.8208542506595 40.5400384479766 40.8420925848403  
 44.4367387274922 42.7982502551634 43.5752393599169 38.7337086062875  
 37.86982638952 39.853866204927 42.4594149893798 38.1835938174625  
 37.4554876386402  
 NT5C1B 36.8072833828297 39.2907645923217 40.5386195997545  
 40.9085497163517 41.467005949568 39.2985791324641 38.977631784251  
 42.157627240486 38.2215591930186 43.2988017098387 38.956280281655  
 38.8964578286293  
 NT5C2 305.399644617845 397.850286751468 346.116601612353 279.175841990291  
 292.47671022688 250.866560791828 314.533750876361 489.622327794168  
 235.420582508332 487.261132702908 425.692369974286 416.149496747947  
 NT5C3 163.280931300437 324.506136847875 291.486402879057 178.592741163095  
 246.09270373893 184.898658656843 209.31241212773 172.381808887528  
 321.069136463599 133.040933717958 179.064697219173 195.108184885541  
 NT5C3L 125.209476374199 101.523741547876 127.836645375421  
 139.101561420631 274.994470779348 261.826480747537 268.990075898188  
 169.18132209076 155.693953208351 187.750540261531 156.497017347274  
 139.847976281228  
 NT5DC1 60.3041738676245 93.584904661285 102.797268694325  
 70.506090074243 60.2886873195135 96.2490896573253 63.5738862549306  
 57.1362071277099 59.5711567415697 62.5528124447176 70.6568303458436  
 80.2456257165272  
 NT5DC2 267.29148042787 495.705224781189 348.757322819568  
 287.121456559795 722.514380928291 160.672144085068 799.803676957263  
 258.789217436101 412.162238678684 234.495626550751 150.545989010484  
 151.848243044839  
 NT5DC3 79.6581393791238 62.7743500747415 61.1076362129586  
 73.1447139654971 78.812106589086 307.922754395377 74.466989900636  
 65.6502223413705 64.7963220317334 152.272399644814 153.103233619506  
 163.011116329807  
 NT5E 112.787082951803 72.4325984501758 94.2275161759277 90.9106103192162  
 56.2305155589239 122.504770242427 58.7585623394335 61.5000955267432  
 69.3300058073438 109.654559065946 95.6182216943758 151.111664091983  
 NT5M 42.7150227340364 38.4330755397458 44.7829632472754 40.0698728584484  
 158.321459945365 65.6914955077809 46.4388841354122 48.0582855095143  
 42.9020321355927 43.6033221838149 44.4688999098904 36.2582325396375  
 NTAN1 125.786923817078 343.990395610093 259.906934432819 220.36831243882  
 155.928417606775 289.05213385509 249.889110678139 291.5513298383  
 254.756894822368 213.309547409053 212.576203581294 256.165801611585

|       |                  |                  |                  |                  |
|-------|------------------|------------------|------------------|------------------|
| NTF3  | 75.0704619826557 | 53.5281825103894 | 45.989212296035  | 49.9014504704021 |
|       | 48.9627346956003 | 90.1080159649841 | 56.7780520416533 | 53.3094843669564 |
|       | 45.4799270968969 | 137.658868649032 | 149.494335028498 | 108.479856042609 |
| NTF5  | 41.1523487516364 | 49.6841415268611 | 60.0856496605043 | 42.6913548400127 |
|       | 51.3511088648386 | 40.8634043028528 | 44.6032218589199 | 47.3791873993182 |
|       | 54.7033747046992 | 67.8233625051884 | 65.088713927995  | 60.1837189855762 |
| NTHL1 | 138.027432399991 | 91.9238405195899 | 125.036267601897 | 92.8026641003757 |
|       | 163.234938974457 | 122.405413080836 | 150.562062400737 | 80.7067505750848 |
|       | 144.37233706688  | 125.946162432491 | 138.859992681388 | 102.717305041352 |
| NTN1  | 62.9952378379206 | 44.3977035913759 | 43.6670755115848 | 59.0262390168156 |
|       | 48.0987228351168 | 55.1547682957918 | 48.4099370357307 | 47.2864663693787 |
|       | 44.7058233759912 | 65.4784797364469 | 59.2106652388061 | 55.7802841481067 |
| NTN2L | 38.304249186058  | 40.0527893189096 | 37.3687900733549 | 40.8681871019812 |
|       | 32.771863438151  | 40.9506062495231 | 43.3262148375525 | 41.3506832276112 |
|       | 36.197424053556  | 37.8217989841918 | 34.9428206949566 | 37.2810767789306 |
| NTN4  | 51.5495799701002 | 73.449126698983  | 119.846620703059 | 41.2445895434274 |
|       | 73.6965494979349 | 77.3999378505514 | 98.403191200835  | 79.5446470027412 |
|       | 187.147252401703 | 116.530589514041 | 111.397578350396 | 177.620987812591 |
| NTNG1 | 47.4870742154624 | 42.7275315121163 | 43.0971787292711 | 47.9915414951747 |
|       | 48.1473938886239 | 106.020559220488 | 43.7540438144593 | 46.695848687694  |
|       | 41.863927676552  | 76.6868184563568 | 58.9135553403521 | 48.6795178347248 |
| NTNG2 | 46.8954576545929 | 44.5152708955623 | 43.7630587657205 | 42.5664883002833 |
|       | 37.2567512265363 | 42.750861693377  | 39.6535880152834 | 39.3709357615493 |
|       | 40.2274522635576 | 38.3092241935352 | 43.5710871617107 | 44.5432192783161 |
| NTRK1 | 43.0001432913058 | 46.0364000143537 | 45.1037002240382 | 40.4893720023062 |
|       | 43.2988017098387 | 43.7630587657205 | 43.5898425390297 | 44.2159020605784 |
|       | 47.841175678417  | 43.4885245598939 | 41.8168470823451 | 41.4508241771315 |
| NTRK2 | 40.8681871019812 | 38.7637503596054 | 41.9335763813389 | 43.6726153508978 |
|       | 38.4222637207467 | 97.5534379346899 | 43.1696495767273 | 43.5738557773903 |
|       | 43.3165374444543 | 48.5330664799905 | 46.2560238004757 | 44.4004151500264 |
| NTRK3 | 40.7022020432945 | 41.7547091858488 | 41.0356368374708 | 46.614092935749  |
|       | 41.2424637338424 | 41.0012755104374 | 41.8751578329365 | 43.0930293831497 |
|       | 41.2424637338424 | 44.2580151149956 | 46.3635803515159 | 42.1537476443423 |
| NTS   | 41.0043775553254 | 41.5132248356707 | 38.4456289125816 | 36.9376982271148 |
|       | 40.7273974755431 | 40.1428591998404 | 38.7745734037492 | 42.8482181313226 |
|       | 39.5411918095433 | 41.3321861371202 | 38.7337086062875 | 39.3575468494941 |
| NTSR1 | 46.1673159982664 | 38.3322849790657 | 43.5710871617107 | 44.7980740332174 |
|       | 41.8806343997257 | 38.2293008890613 | 55.2088411137193 | 40.6171774724171 |
|       | 35.6139301508335 | 43.7303813515864 | 38.6662194645633 | 46.4499258373233 |
| NTSR2 | 39.8662795144616 | 38.7344853699576 | 38.0452862258803 | 44.0451487108213 |
|       | 39.8238654968211 | 41.6086894860496 | 43.0177448037924 | 40.5585676679482 |
|       | 45.7911932481722 | 43.7920955808549 | 41.5638908543693 | 39.9519547348106 |
| NUAK1 | 389.422882761332 | 110.487281983469 | 110.362432903746 | 174.021676013865 |
|       | 97.1884078242617 | 109.86466812799  | 65.1041577962151 | 88.0827215704624 |
|       | 84.4938528830721 | 70.194061829681  | 79.4832790698673 | 81.2068428211497 |
| NUAK2 | 59.3353474684952 | 58.4134572546373 | 49.33855351691   | 64.8154690917175 |
|       | 45.1899271235974 | 38.6704566269103 | 45.1694246393676 | 51.555506218204  |
|       | 53.4921736109774 | 39.6719190054379 | 44.5152708955623 | 47.8931773060789 |
| NUB1  | 207.18510695093  | 191.284436365696 | 214.691909801388 | 305.279475274196 |
|       | 171.992427227088 | 224.509915754308 | 182.643498505575 | 152.608998839745 |
|       | 284.105466865264 | 295.917955889194 | 277.367257933324 | 182.885934774318 |
| NUBP1 | 104.135574209392 | 137.360931076154 | 163.877163712385 | 195.765247956108 |
|       | 106.276392548097 | 158.156217755244 | 162.160380044249 | 99.3448096967314 |
|       | 175.619398238068 | 131.779333469955 | 150.362006499825 | 111.357508398822 |

NUBP2 85.2893380711323 98.9988668602468 137.294289316915 80.1809075683154  
 111.77505926669 96.8783070574131 126.171040948196 57.8765910878975  
 97.2425832658887 95.1000239210194 97.0348634204639 75.3271272345679  
 NUBPL 552.480471244789 342.387761195952 422.931891494195 515.216890329893  
 286.996922972683 298.282957415786 565.411298018845 1359.9708539999  
 322.888035865453 960.526372655577 1014.6400720037 648.380417557148  
 NUCB1 4597.60989502097 3244.27810937143 3838.19449971537 3634.98300564068  
 4368.11345948444 3884.2191293028 3905.8371644287 2598.78910128081  
 4752.94498024732 4128.92158369026 4482.5285743878 3296.66056024983  
 NUCB2 152.17335005192 140.559370165331 94.5055588176321 249.942109342324  
 91.6253858792439 204.477547372897 107.325456368022 139.645717741863  
 164.529367656711 168.073605090354 99.9752275166514 157.639656300073  
 NUCKS1 72.613397507717 49.2934904960601 53.1491634301682  
 38.3166554965434 58.6481644777552 50.5148383400703 59.8273072817267  
 90.1430468048409 55.4030910454028 78.6859709780134 58.5588286084726  
 63.6254894053045  
 NUDC 746.847753035399 995.397944432196 969.805093523651 688.168272082335  
 1163.0370991733 1064.35745220225 1582.45600339543 1195.24078948059  
 936.978983469829 1123.99110499679 1297.78424326775 958.473187253938  
 NUDCD1 44.0328992213727 43.8495248991589 49.9256753636167  
 45.334106390212 65.9413235523618 55.0009147092272 45.7452456977857  
 42.9301944191913 46.4164127487052 47.9056710878325 41.9908237694988  
 50.2163892855092  
 NUDCD2 57.6285775590145 56.0183341691645 62.7977686460693  
 50.1185085888209 73.2607982527105 52.7156971154405 53.3974326903004  
 49.4372551433223 62.9922928277769 47.6796628154287 47.6388115824631  
 57.0218130094212  
 NUDCD3 319.328571608303 166.399121350223 150.011814577972  
 159.835690229505 234.172977976583 256.766675299448 202.01900875263  
 231.685652845234 283.643027929014 376.453560620912 407.249003342541  
 211.625447303889  
 NUDT1 171.974852167092 112.944044862693 101.634888749356 76.7137782332689  
 182.091945578277 100.650129064849 169.251790128723 238.025903833797  
 231.361506886859 113.46454061183 104.462230406058 91.531459931855  
 NUDT10 36.3649677956953 38.0834507308871 39.7411455670172  
 42.5664883002833 39.0564222526273 41.0012755104374 39.3585350448719  
 38.1835938174625 39.2497056720346 43.4885245598939 38.4251036088595  
 40.9683275553869  
 NUDT11 58.651329686676 44.1239711172417 46.3411353377615  
 44.6131679221578 49.452985143568 69.0530953932111 43.0269218496197  
 66.295597720304 44.6717213146407 62.9604757922393 65.5386366902998  
 56.657759220121  
 NUDT12 51.2851682978581 42.0709558258414 38.4043916290561  
 42.1273928203021 39.4693871570028 59.9876575158981 41.5817737564592  
 37.1317006162938 43.3744503319109 53.3059058105836 49.7363778831003  
 58.6481644777552  
 NUDT13 45.3872406432794 47.4740726032707 53.7792717770978  
 58.3475983630509 58.037539503209 53.565717255469 43.1931731665131  
 48.9826868640753 64.9725753882126 53.0357938671646 51.2318935933116  
 59.0894921452893  
 NUDT14 382.251727747377 294.7772562683 345.084002073846  
 284.506664353513 241.202687910704 117.408885431274 235.613437037284  
 216.566390646568 548.387793019855 422.931891494195 299.524171071613  
 326.500804513133



NUDT15 79.1922819549042 83.5274372175811 62.6885730386156  
 56.4578213622965 74.7557519831859 62.6328512719486 72.6959688212342  
 63.61404854326 87.3468807607655 52.1788489555942 58.9135553403521  
 66.9239565096247  
 NUDT16 55.9249770393176 73.3950348855139 88.4211119834434  
 95.1423940686828 93.7924763988692 123.321810678947 77.7615826856723  
 79.8264217848103 68.6379135603075 101.351907645804 100.663054866186  
 88.0877175295544  
 NUDT16L1 107.034189847828 179.016449848479 157.856158440506  
 91.5202521578181 147.165235402905 87.4239220649478 106.317388820963  
 70.4732736918246 127.232160404726 117.502489192855 156.822939275312  
 130.62791061956  
 NUDT17 45.6517320730042 40.0527893189096 43.5710871617107  
 41.5464765641928 41.9842695818285 43.6670755115848 46.1634822993009  
 45.5581356216957 49.5539622682049 50.3388505346542 42.357910063876  
 44.6484005362281  
 NUDT18 229.159869771704 77.268323196327 106.679905803492  
 149.260740603715 58.2780916793348 62.843734579668 75.164719839017  
 89.0275988550016 113.7763650775 163.048439401341 139.614715580418  
 73.2234405348435  
 NUDT19 37.55264801907 55.7405934254857 51.6159542017038  
 43.074472921841 56.8307116636372 44.4619248757502 44.9863726205428  
 43.7396619462033 42.7150227340364 44.2580151149956 46.4753015651202  
 44.9070250604284  
 NUDT2 192.922622120507 137.955007835039 151.01326330819 226.882600557693  
 110.287699369482 197.868575583033 201.208357379329 162.000275136397  
 147.300356318739 249.995119246929 205.876395674271 173.992867985744  
 NUDT21 78.0020909283414 96.7422527189063 103.64431747876  
 76.1682394916873 128.230543301378 106.527144354592 95.1224420992193  
 68.2975137482252 132.851109034738 74.7853626582536 108.779357041421  
 122.419178597878  
 NUDT22 97.9401338178996 120.60052672409 150.362006499825  
 115.913030448537 245.356135592468 117.127994102455 149.312893905408  
 124.409631245033 148.144200968432 132.449486271581 134.085457101528  
 119.301672388541  
 NUDT3 494.733185937057 179.694413858411 225.35760689842 249.148159759128  
 360.43303227067 336.904716156626 313.660064080622 356.948763043851  
 290.524288545599 285.459248157609 249.051882344771 274.648263378054  
 NUDT4 42.6036491382658 51.119812302881 40.8846826807717 44.1483976313959  
 39.6535880152834 37.8102105794655 45.9635923776719 44.3521099857368  
 49.8304479381623 50.22432299342 42.2618615571566 46.1088006335399  
 NUDT4P1 40.4639532172338 41.8534933577029 38.941855825269  
 39.5637454855233 42.0709558258414 41.5132248356707 40.7376840028647  
 39.9576138799997 41.5635499110307 38.8507804383261 41.7272875295469  
 38.5279745308203  
 NUDT5 266.687281047486 241.08817915181 301.728842562175 292.065366215278  
 572.968592371501 196.065114892186 500.672147150237 397.850286751468  
 510.82619253142 143.706880936186 147.579873410455 279.001128345613  
 NUDT6 43.844855336215 45.7576020206129 66.6479153633977 51.4478439325381  
 59.1948983423381 51.7559889673784 61.781473363969 50.0138654298815  
 61.9682048429354 45.9301227940101 47.6388115824631 49.2064066614865  
 NUDT8 42.5193208629123 44.9370339275041 43.8495248991589 36.264823544143  
 51.0107745412152 45.3882138838137 45.6042625176633 42.5435283762933  
 41.1742244762318 42.6793753550854 42.8263096141654 39.4490233720848

NUUDT9 99.3448096967314 102.760704801607 145.75465017845 102.294142438313  
 122.642481894309 123.433224929087 68.8167148906225 95.6731932757489  
 137.658868649032 91.7629175712824 100.489477730896 147.34358398245  
 NUUDT9P1 40.5654775358427 38.8336427948187 45.8844325913247  
 34.1051821768421 37.6527901109005 36.8059561571675 37.2892641289258  
 35.0510338774593 37.5469247328848 41.9666541498638 46.4205654140754  
 42.2577689927563  
 NUF2 45.8574226904273 42.2577689927563 41.1367478979484 39.4569929845912  
 52.1186591838715 39.5472604976664 43.8206425661746 42.3110002461296  
 44.293922970134 46.9598474201212 39.8184668132023 41.4508241771315  
 NUFIP1 45.4507786740825 39.5573415356949 45.063792968927  
 39.3455642782085 47.6153629331146 47.5216423686268 49.1067959632109  
 41.9315419791594 46.2718838939055 40.4518431978241 48.2910530887214  
 49.5539622682049  
 NUFIP2 122.642481894309 120.284321694275 93.4980947651211  
 132.205423909251 114.84900130932 100.205124008648 142.789889238338  
 158.321459945365 124.815448107572 109.481322353402 99.3744103955071  
 129.478225450604  
 NUMA1 146.737709403779 159.046483157634 137.294289316915 107.906865732219  
 133.893108529325 180.065047496273 204.710892826638 158.769954040462  
 167.095818680513 271.813877560354 275.026256072452 157.312247745825  
 NUMB 282.328238928883 171.877918435017 244.560715635796 598.200103861994  
 184.087380444203 347.552309199761 179.342338803631 226.580055691897  
 283.951419701286 344.985739524681 289.533968432846 333.648836970147  
 NUMBL 40.7609952437622 39.6123051184545 37.7384958256497 39.6292788039793  
 39.859345745831 54.3478800757394 45.8980298854198 37.9837233601316  
 35.4332080966594 37.920964499903 38.5668610487033 43.3744503319109  
 NUP107 216.063990451376 140.369714831352 137.034037711549  
 122.024487499513 244.466972245417 161.526970033915 261.023196824723  
 155.872353189452 243.952697457779 124.56803502087 132.851109034738  
 152.47776741936  
 NUP133 169.561107057293 180.994353525666 205.051252996628  
 130.908206625954 233.435884567494 163.742560819575 178.092166249096  
 254.756894822368 169.633672522325 204.502683458676 178.624349589089  
 173.856274004533  
 NUP153 195.654315886452 153.42135363926 127.949712300256  
 152.679927202674 316.745819100367 170.829628173552 425.692369974286  
 354.634819362978 190.27040993548 111.771533072688 134.776408077533  
 171.176393131741  
 NUP155 100.489477730896 110.818741525514 123.841740274811  
 110.88526946931 180.648144492464 83.2925226467532 179.994715581707  
 282.52439146354 140.076084766156 93.7444359334292 92.0269919454947  
 105.74849082793  
 NUP160 148.758736522703 219.479625048916 187.002948435359  
 166.608353896248 205.378123452174 235.018922676506 177.688415930665  
 123.219313750907 185.703644892356 127.034476771265 130.890690835631  
 206.857208722995  
 NUP188 176.02137177982 130.615540145155 92.6672238953636  
 149.260740603715 139.204639906937 118.186590679218 234.172977976583  
 135.012695962236 142.840631375936 152.36389833079 154.19962858342  
 113.7763650775  
 NUP205 399.027079798213 348.206465194205 239.610773859055  
 234.556113280762 505.294880430281 252.280105035425 328.788681417522

298.031228833741 461.500892766266 300.762511215441 292.600202149564  
 327.948814478441  
 NUP210 88.2427413480277 66.5141009463313 58.2986825661503  
 74.6159297822533 127.908440924429 57.6034762511847 78.8250642061439  
 132.931052537195 88.4594321382477 45.1569741609597 53.0177144132449  
 54.5921287593554  
 NUP210L 40.148780650831 40.2493681589104 43.0602678767669  
 44.7980740332174 38.4540849632254 40.5281496800812 41.3094485574845  
 39.9941474864076 37.9837233601316 38.9207612933107 42.5023941254529  
 42.0709558258414  
 NUP214 246.869486382264 150.957220787781 119.634256037186  
 328.236037051756 147.945429978177 213.655570682141 217.39432336811  
 243.27954361539 159.046483157634 237.754990288051 231.304658157247  
 166.1490536844  
 NUP35 59.8838591118356 59.9682734755814 62.5194460957899 50.8567345921473  
 89.1771576058145 67.4256666294142 52.0942589368478 51.2623287419357  
 74.220854748627 46.5650556481721 57.5430365699386 75.1674447943072  
 NUP37 191.771063132796 458.230500859847 410.058119360034 270.202959012185  
 567.827069916244 276.86542239106 465.266372824212 302.143385957116  
 788.950470077369 248.414210905199 269.284584971871 345.443895623911  
 NUP43 296.080833914967 218.819478568299 264.495576211074 157.312247745825  
 276.149150203786 182.836805462079 248.438376348617 273.764998628636  
 201.941251308732 332.745139672471 321.26586939039 214.316246155274  
 NUP50 59.2720151666582 65.0644200368502 65.6620676514157 66.8288956287896  
 117.689172019617 61.0311116373365 57.51482768194 103.104022477607  
 60.7193676776237 48.8623729374733 51.119812302881 65.7196733766698  
 NUP54 186.67069792963 125.027865666372 113.322929203297 106.712703356565  
 119.572497267498 135.012695962236 131.330480963914 123.978615472736  
 131.010196997585 102.38706554984 96.2799270895937 141.154520472188  
 NUP62 388.336994961328 628.403814060213 477.410937135204 498.958550919515  
 1026.51177853708 355.642611713396 668.773022931608 398.049525642349  
 677.855726232203 323.855522995794 351.637117984528 323.295794446334  
 NUP62CL 83.0534943004588 63.1137861754989 46.8267540220952  
 51.3851157261451 73.0433648756396 40.650742261428 118.899737794318  
 105.474920850981 80.7409247380392 75.3333024462557 69.3645322033576  
 60.3816817102326  
 NUP85 325.949742917126 254.756894822368 288.386446189379 169.144145421022  
 349.589955244523 251.210603834628 343.764108830519 322.300347485889  
 376.931257615162 191.253860976433 185.667983376361 272.022473793857  
 NUP88 314.006301513986 372.02379581293 260.766438659762 239.316215255944  
 329.72032366183 252.583117397109 533.468347491982 349.83809766755  
 246.680724959444 260.581111456578 295.848968688724 287.184421338984  
 NUP93 321.26586939039 343.764108830519 348.123960682064 218.165286111397  
 494.231747291283 213.981743647681 347.334340102921 312.984737387254  
 373.626843592567 222.696947669812 300.762511215441 178.400810392873  
 NUP98 47.6153629331146 54.9919060580109 52.1024135605001 73.9376772899278  
 55.7802841481067 51.5715929289773 53.6446045619513 48.20333858352  
 63.1091746640396 46.2812662789806 50.280793313765 49.5539622682049  
 NUPL1 40.5654775358427 45.9542131221291 42.59352468383 46.5578790409334  
 44.0451487108213 45.6129956328415 47.3605100090439 40.6737160001291  
 44.4705803337568 46.0119912782855 43.844855336215 46.3994831264262  
 NUPL2 187.422036538629 200.93077689667 270.394857925086 135.377859777529  
 254.023393889525 157.7623351008 150.829277770546 157.714216527613  
 241.052700961064 156.150710793563 147.782301091454 195.376772135023

|        |                  |                  |                  |                  |
|--------|------------------|------------------|------------------|------------------|
| NUPR1  | 274.962689159729 | 51.8610060995363 | 66.737740728688  | 203.913062066149 |
|        | 95.1131101630937 | 320.889609846069 | 47.8947595316832 | 81.0331497830643 |
|        | 137.484063876244 | 225.53019299714  | 233.435884567494 | 173.434174644937 |
| NUS1   | 41.7397731376692 | 44.2105195734073 | 43.6670755115848 | 50.2163892855092 |
|        | 43.2484996523549 | 50.9724155054821 | 55.4004611309636 | 43.4544762830742 |
|        | 44.5303781239209 | 53.8260140375214 | 50.1649089793069 | 50.379587451669  |
| NUSAP1 | 197.040881690021 | 233.137958980552 | 119.124583755587 |                  |
|        | 96.6957892186886 | 316.745819100367 | 82.3364971911816 | 464.495132469257 |
|        | 308.841311505431 | 372.525928228911 | 48.3693338695392 | 45.6706505553383 |
|        | 57.8876850634922 |                  |                  |                  |
| NUTF2  | 59.0463859571117 | 69.1414574152997 | 78.450972383987  | 55.8709511400674 |
|        | 81.2359429678503 | 66.7278011183421 | 91.983638239817  | 65.0656365694468 |
|        | 65.2881198932621 | 43.4885245598939 | 44.8872784170036 | 60.4872675915085 |
| NVL    | 65.6010220593397 | 77.7481370715949 | 97.2124452343726 | 72.6824533717231 |
|        | 86.2836002982515 | 69.7677752398541 | 96.6359641162026 | 82.2266112813039 |
|        | 78.9843115855414 | 81.6233038764401 | 67.2575005672188 | 71.7408778060956 |
| NWD1   | 45.7356815244513 | 31.6295801599123 | 44.0451487108213 | 39.066284740632  |
|        | 37.3508690072156 | 43.2805590023412 | 38.4005795891396 | 40.931294690669  |
|        | 44.8003345643334 | 59.4309046716701 | 44.2142581488029 | 47.2131144508464 |
| NXF1   | 387.631477822638 | 387.039093527273 | 448.508714709248 | 498.608204176238 |
|        | 499.356036793973 | 396.93169345515  | 435.901460958456 | 384.180564204564 |
|        | 426.622204035624 | 538.153124145211 | 509.879213331349 | 342.387761195952 |
| NXF2   | 41.483412492426  | 41.4223563635976 | 42.9641759692926 | 46.0905079010237 |
|        | 40.4166536885831 | 41.7256940298128 | 40.4941260038116 | 41.5934628038429 |
|        | 46.6491671626143 | 42.02667925031   | 37.8372168909583 | 43.9366081640576 |
| NXF2B  | 42.1679276329916 | 40.3104838541906 | 44.2733573199954 | 43.367124590178  |
|        | 43.8835874380262 | 43.6670755115848 | 42.9803717121865 | 44.6107027295193 |
|        | 40.7460990419215 | 45.3530683538086 | 40.547835538778  | 42.0424641526302 |
| NXF3   | 42.9104454767916 | 44.9370339275041 | 49.4573631027613 | 41.7614975630362 |
|        | 44.3557408297309 | 34.3887641786747 | 43.5627649099623 | 40.6171774724171 |
|        | 40.5912213523345 | 44.571915452417  | 45.4799270968969 | 45.7562276914441 |
| NXF4   | 40.2087556903277 | 42.2900457798748 | 41.554942319225  | 46.6849259108754 |
|        | 39.7568367479301 | 39.8455060654531 | 40.6750540874299 | 38.1835938174625 |
|        | 42.2248608921879 | 39.3113207075992 | 38.079222289614  | 41.9083581529276 |
| NXF5   | 40.148780650831  | 43.9421822132391 | 37.5597671487621 | 41.5464765641928 |
|        | 34.5301949364147 | 41.0582900711341 | 40.7910160811527 | 35.9023742468744 |
|        | 39.9444191873552 | 43.6033221838149 | 36.0481934423077 | 40.7704587752083 |
| NXN    | 264.495576211074 | 65.6721629145797 | 133.576489624155 | 126.69706456173  |
|        | 171.899182876869 | 196.29493890075  | 133.877825732645 | 78.5375244257332 |
|        | 47.9035532886869 | 214.369365247268 | 248.744491123257 | 211.064699765122 |
| NXNL1  | 51.413025495745  | 46.9919960628953 | 41.6977706798234 | 47.8164193292842 |
|        | 47.8075998240396 | 48.0350549043063 | 62.3556396662215 | 56.9299697426319 |
|        | 45.8325181856483 | 59.8130420783374 | 51.0492389286271 | 48.0350549043063 |
| NXNL2  | 41.3785995857154 | 38.8336427948187 | 38.941855825269  | 43.7410507935043 |
|        | 41.5668884168669 | 36.7356360093603 | 37.5469247328848 | 42.0494116081998 |
|        | 42.4540072551568 | 39.528971131769  | 42.5023941254529 | 38.7012264805355 |
| NXPH1  | 50.0466349801009 | 44.5884811528117 | 46.6588655218735 | 43.8002456102021 |
|        | 42.269054475455  | 40.5281496800812 | 42.357910063876  | 43.5544347011646 |
|        | 42.9020321355927 | 47.3791873993182 | 40.9157352260901 | 47.0130468198828 |
| NXPH2  | 37.7384958256497 | 41.554942319225  | 41.0356368374708 | 48.1662933382789 |
|        | 37.2567512265363 | 38.1169703906207 | 39.3585350448719 | 38.4540849632254 |
|        | 37.10170285405   | 42.8936990772838 | 42.7275315121163 | 42.8864415494484 |

|           |                  |                  |                  |                  |
|-----------|------------------|------------------|------------------|------------------|
| NXP3      | 47.6397712007919 | 41.9894412416874 | 43.9450023643394 | 40.5484717678957 |
|           | 40.8873907150245 | 72.8472187581193 | 42.7431359850339 | 43.6434576713809 |
|           | 42.5406888281114 | 55.9283039581662 | 74.1425714439424 | 52.8455400026194 |
| NXP4      | 58.9801947700265 | 41.6466169548846 | 39.8656165405284 | 37.4642807402741 |
|           | 41.467005949568  | 39.8785903668981 | 41.5399751350162 | 43.3838505886856 |
|           | 47.640730838451  | 43.2438688757519 | 37.9491866904702 | 36.6083186362649 |
| NXT1      | 362.03448469738  | 602.047768767953 | 496.163796158189 | 562.258108316474 |
|           | 1369.13346566895 | 609.243908604949 | 996.520340280883 | 306.66244801017  |
|           | 633.385474385877 | 327.786619565391 | 346.844545554188 | 430.283061862756 |
| NXT2      | 38.1169703906207 | 49.3581578587582 | 44.9758339877851 | 47.3574589211166 |
|           | 59.1948983423381 | 45.7300501624017 | 64.3669451425581 | 53.7378346199838 |
|           | 58.3564461855595 | 60.8730416435467 | 50.7903824729818 | 50.2163892855092 |
| NY-REN-7  | 42.6036491382658 | 48.8584917918986 | 44.4311655729487 |                  |
|           | 43.074472921841  | 47.6884372645373 | 44.1737502492846 | 49.2546642180676 |
|           | 45.2806199505029 | 46.0106098064475 | 41.3321861371202 | 49.1868644496737 |
|           | 44.0451487108213 |                  |                  |                  |
| NY-SAR-48 | 75.6471706262645 | 73.9732553364283 | 62.5194460957899 |                  |
|           | 68.878562323012  | 99.7668527666705 | 58.3015837845113 | 97.9401338178996 |
|           | 109.811921160228 | 96.2799270895937 | 62.8201270538435 | 62.2200723764909 |
|           | 59.3082373468217 |                  |                  |                  |
| NYX       | 39.266565827316  | 39.6123051184545 | 38.8775560911841 | 43.5627649099623 |
|           | 37.5556299264699 | 36.1190722948669 | 37.6036146841933 | 37.5511560880902 |
|           | 40.8970401536578 | 35.0082729554459 | 41.0808257270221 | 43.1805016690297 |
| OAF       | 482.238595345574 | 344.657779779036 | 377.221676837377 | 423.804472820231 |
|           | 520.415257194417 | 979.468753716758 | 185.924923239764 | 340.812638857273 |
|           | 319.596352961751 | 622.435313940734 | 515.856807472321 | 585.421238639853 |
| OAS1      | 79.0304119352941 | 272.315378390681 | 110.399579382196 | 69.734208465775  |
|           | 118.771995863848 | 68.0501900087917 | 136.155022329495 | 119.512426152446 |
|           | 184.303357812653 | 69.2963913574682 | 69.0975200641705 | 165.42634596698  |
| OAS2      | 121.01013827107  | 307.550936236018 | 240.217589414972 | 170.390108862804 |
|           | 148.879760620316 | 88.0055507173538 | 182.976132230487 | 149.295715963625 |
|           | 295.430709655678 | 159.52633805025  | 126.420070148631 | 132.555169949054 |
| OAS3      | 95.0026207727863 | 234.078434290473 | 154.455976468088 | 89.0684909049451 |
|           | 117.574549567    | 66.4568741702152 | 129.070921534555 | 109.137372445043 |
|           | 159.095553026723 | 97.7620313090597 | 101.187156681366 | 123.27141431776  |
| OASL      | 40.7022020432945 | 50.9643363406241 | 54.1952533541951 | 45.334106390212  |
|           | 47.2074332636566 | 44.1737502492846 | 44.3440839686558 | 54.2301964914419 |
|           | 66.3826728861909 | 46.8954576545929 | 45.5055402477919 | 48.3119523820103 |
| OAT       | 287.981727851442 | 120.943323740458 | 373.330920144642 | 470.004780385708 |
|           | 395.634889855838 | 763.947361966861 | 275.407306413402 | 296.532363090593 |
|           | 244.285061669874 | 204.502683458676 | 229.584451980272 | 295.69493803986  |
| OAZ1      | 7393.77508374057 | 10617.4323014458 | 9582.11974031559 | 13656.2581082905 |
|           | 9181.13240708506 | 8703.02873382565 | 9488.06491634484 | 8050.256095383   |
|           | 10351.5373412096 | 7323.77427153966 | 7127.13565491501 | 6134.89208517976 |
| OAZ3      | 53.8856501960117 | 49.6203214143464 | 56.2441895183416 | 53.3967242431461 |
|           | 51.2525124735102 | 49.8472708021525 | 42.4939802311136 | 52.8622615027833 |
|           | 53.9287524861617 | 52.7972156492746 | 50.3221380889396 | 57.0524725494273 |
| OBFC1     | 175.028390974125 | 321.686871145301 | 412.421643885499 | 187.331614826395 |
|           | 200.019523376661 | 158.156217755244 | 284.351747562807 | 406.104588997462 |
|           | 276.360065404067 | 345.876877384089 | 305.048508698231 | 380.736562250846 |
| OBFC2A    | 202.459251553516 | 116.374125502825 | 166.33117014492  |                  |
|           | 507.498146970824 | 204.659954879641 | 190.570409327756 | 89.6056978251991 |
|           | 265.467750156221 | 112.311249826645 | 112.375316615894 | 118.854313907627 |
|           | 150.396608064863 |                  |                  |                  |

|        |                  |                  |                  |                  |
|--------|------------------|------------------|------------------|------------------|
| OBFC2B | 158.429106463866 | 115.942945263238 | 125.137803364368 |                  |
|        | 141.423857667761 | 194.703024752864 | 153.797431763616 | 188.236842521312 |
|        | 364.044597485771 | 231.085533860683 | 176.506718222092 | 173.536155357688 |
|        | 138.070735985503 |                  |                  |                  |
| OBP2A  | 41.7397731376692 | 44.3529919625344 | 38.7745734037492 | 40.8681871019812 |
|        | 43.9450023643394 | 42.0574848021044 | 39.0458123429605 | 42.2577689927563 |
|        | 41.5635499110307 | 40.4136535208406 | 35.1470994647364 | 42.0424641526302 |
| OBP2B  | 41.3387790895716 | 35.4484652445078 | 39.1799070031819 | 35.9521941716188 |
|        | 37.3508690072156 | 34.0777108441756 | 37.0564573649223 | 33.0038344711883 |
|        | 37.10170285405   | 38.1042454705119 | 41.0050831223107 | 39.3575468494941 |
| OBSCN  | 52.4179224871914 | 58.9910892923962 | 55.6865353018811 | 44.9370339275041 |
|        | 68.9038222450855 | 49.3172204533818 | 56.0515443021293 | 39.0620487644635 |
|        | 57.2716485658185 | 85.1188125003595 | 64.2174369755376 | 58.8188963227059 |
| OBSL1  | 42.9104454767916 | 42.7775752471711 | 41.528370959196  | 46.7577982595088 |
|        | 40.4639532172338 | 44.0804700754786 | 38.1793598983615 | 43.7396619462033 |
|        | 42.9020321355927 | 42.1622837416589 | 44.6286581923295 | 45.3763275588341 |
| OC90   | 38.6454098044474 | 35.2143190355414 | 40.1985790927248 | 44.0451487108213 |
|        | 34.3633615460307 | 40.244271403831  | 40.7910160811527 | 39.9576138799997 |
|        | 39.5806465938526 | 39.6719190054379 | 41.7272875295469 | 39.8497227447888 |
| OCA2   | 35.0202257459026 | 37.3634897565502 | 36.6522278218553 | 37.0732977341185 |
|        | 44.4489662507893 | 39.4953494583071 | 42.4939802311136 | 34.8949555140527 |
|        | 45.3756389170606 | 38.3092241935352 | 39.153226699662  | 38.1421709520616 |
| OCEL1  | 266.129007472128 | 192.112101000423 | 293.217518524507 | 173.536155357688 |
|        | 239.229093340475 | 174.933650466403 | 184.087380444203 | 273.108672916862 |
|        | 297.662970257144 | 254.519518210024 | 238.697159169213 | 288.386446189379 |
| OCIAD1 | 1243.32650314893 | 894.486674059951 | 1093.84714207969 |                  |
|        | 1047.33749100342 | 670.023570141464 | 707.4124863603   | 851.813216452015 |
|        | 1541.9572099378  | 771.554891868456 | 1752.11152588494 | 1829.30985071028 |
|        | 1487.80306986156 |                  |                  |                  |
| OCIAD2 | 330.391945158969 | 752.837247653926 | 904.487756674518 |                  |
|        | 245.004434952963 | 395.298033031033 | 147.269661124015 | 755.852629128252 |
|        | 912.757335169259 | 790.094848284547 | 296.933220681369 | 269.438510636306 |
|        | 496.791391622565 |                  |                  |                  |
| OCLM   | 38.5007204246293 | 44.2105195734073 | 35.5220586859301 | 37.29566077996   |
|        | 42.3685136297603 | 44.2607789091176 | 40.2154497375715 | 37.5511560880902 |
|        | 39.853866204927  | 42.6793753550854 | 41.9908237694988 | 46.8129509799753 |
| OCLN   | 40.7609952437622 | 41.8073910693411 | 41.8389336728199 | 39.6292788039793 |
|        | 39.8198309498737 | 41.399074748665  | 42.4939802311136 | 37.5511560880902 |
|        | 44.1519466943185 | 40.0557788909923 | 40.6857324478814 | 40.8681871019812 |
| OCM    | 43.0001432913058 | 40.4359177791566 | 36.6522278218553 | 36.4564050256915 |
|        | 36.6354013629791 | 39.132725377815  | 37.1643693306382 | 40.7311497914871 |
|        | 35.5220586859301 | 38.4187686307607 | 38.5668610487033 | 34.9138625012006 |
| OCRL   | 143.084029849218 | 153.797431763616 | 193.853749625939 | 81.6780581904253 |
|        | 216.358862796367 | 229.621795088195 | 135.226924329183 | 196.709620264975 |
|        | 188.008141649466 | 212.688298502868 | 211.485592971588 | 206.559526386642 |
| ODAM   | 41.4508241771315 | 34.8137085420423 | 41.1367478979484 | 39.9697332660833 |
|        | 58.2780916793348 | 43.3785777889265 | 44.3440839686558 | 38.3684202018524 |
|        | 53.4604353973381 | 49.7259371799014 | 43.6629145624937 | 45.6692241948108 |
| ODC1   | 353.076989769287 | 746.252816568691 | 218.531478946522 | 377.847116683974 |
|        | 891.080174768895 | 667.583623414832 | 869.879392791086 | 513.57613902662  |
|        | 348.964065997095 | 304.258586051126 | 346.438778257772 | 359.241360412129 |
| ODF1   | 36.8072833828297 | 40.716553247236  | 36.769073068743  | 43.9282059368202 |
|        | 41.467005949568  | 41.8613406887824 | 42.9803717121865 | 42.6450179841129 |
|        | 40.2274522635576 | 38.528621456378  | 38.3684202018524 | 37.6557714476853 |

ODF2 116.184007615285 117.626009607247 88.3725577276628 85.5269681075807  
 119.124583755587 87.8260173707897 128.327641457403 103.470005076276  
 91.1363393944977 64.8549209064366 74.3394153125605 75.1953706943085  
 ODF2L 105.563773939475 72.0482026084702 55.3122077514658 53.2046867327331  
 57.3562426592112 52.7156971154405 65.7457567201236 65.1041577962151  
 52.2631308081333 44.5264064957804 48.6184776976167 43.3234153488091  
 ODF3L1 41.4508241771315 38.8336427948187 41.1367478979484  
 45.0798408927912 44.3557408297309 39.2248354955045 41.9393838138203  
 45.642304356051 39.3750969348308 41.8613406887824 45.0589947942306  
 38.6454098044474  
 ODF3L2 37.9387791625384 42.5269793679335 42.0621425894624  
 41.8778873678551 92.0958762013613 49.2050538150106 46.1634822993009  
 53.2046867327331 40.4220196471124 45.1569741609597 48.4717951775049  
 40.1700117452801  
 ODF4 37.0320432433314 43.5182502375207 43.401782064778 43.6726153508978  
 43.4544762830742 46.574682061365 39.3585350448719 48.6441988290952  
 41.1742244762318 37.0320432433314 44.8872784170036 43.6753843488695  
 ODZ1 37.55264801907 35.9305494063137 35.8265993915844 41.5464765641928  
 40.2449343247539 35.6125439901743 40.4359177791566 36.5393857306744  
 40.5912213523345 41.6373771565199 37.6484782516569 40.6614700944853  
 ODZ2 42.5193208629123 41.0678614026819 47.7737810047679 40.646702696033  
 48.3814421939888 41.159706131351 44.2166118829877 52.1788489555942  
 49.7336769474446 40.7063426028871 42.170702295259 46.8129509799753  
 ODZ3 128.281765653795 44.3529919625344 40.301483914446 70.7202372217584  
 41.9842695818285 75.7502062965698 44.3440839686558 54.6067620335514  
 40.8970401536578 48.7414853386615 68.6199296680241 55.6351010690528  
 OFCC1 39.8662795144616 29.4159269895179 42.5406888281114 39.9697332660833  
 42.4864576619427 42.5660695551615 38.5066108855005 39.7509165247419  
 44.619512785899 44.6918600441328 37.2018803984555 33.8196020406676  
 OFD1 78.7450149191851 97.1271615802556 85.7111041637416 66.4047895961325  
 67.9032387662129 74.7669841575348 105.247736284747 131.483899499125  
 93.9756797434207 94.7110944331075 103.491711140137 94.7008981904016  
 OGDH 143.517244617936 70.8546350449171 82.0149542477384 116.490154128114  
 91.3362264594431 114.935101645207 90.5603308057889 139.731620245421  
 89.1632548302738 123.768417863139 136.657213529097 91.0346886951891  
 OGDHL 62.4317959077388 58.174555206394 44.6032218589199 40.7481155008596  
 83.6438735616921 43.1826328292558 76.3583555666815 48.87875862356  
 49.3780606970538 55.1089864632456 47.9942520395434 48.7814131120945  
 OGFOD1 177.425508756002 146.701131209299 160.303575545559  
 125.801834682035 229.512022912803 158.408644964483 164.580141651883  
 125.835967514239 145.561345203804 123.095695502815 128.126336084436  
 143.233722839451  
 OGFOD2 47.8249696958403 38.4330755397458 46.9040704638073  
 41.3027031037343 45.9104478407175 43.5752393599169 41.0381860307445  
 46.0633179231318 46.581796165231 48.0211752672327 45.390192977585  
 39.4490233720848  
 OGFR 269.91014029861 290.371909722404 225.725485439572 372.131471268346  
 228.054565950253 210.73006676203 277.164276391513 244.343381048643  
 229.035497774884 277.325795311848 276.084235934753 158.449570606242  
 OGFRL1 50.7794426814906 49.9951674107458 50.9010149857308  
 109.615289274998 48.5666902992029 57.7463129434768 55.2998422481855  
 50.8160430472218 48.1578509702472 41.8613406887824 42.6776449468246  
 48.6447083765118

|         |                  |                  |                  |                  |
|---------|------------------|------------------|------------------|------------------|
| OGG1    | 65.8306182796781 | 64.3032703931013 | 63.3999425418402 | 62.6048727240291 |
|         | 82.8095009455738 | 71.9805290614073 | 74.621822948059  | 62.6386437936516 |
|         | 56.6884575165011 | 61.3800530107369 | 53.2695955993896 | 61.9882398986333 |
| OGN     | 56.3785228322238 | 40.1073950092563 | 38.738305958734  | 38.8025302527057 |
|         | 38.8775560911841 | 288.687391623935 | 36.3619866938624 | 41.8417024632349 |
|         | 38.6558726824244 | 84.2213498413102 | 67.0361353184222 | 50.4847465816184 |
| OGT     | 187.238252376588 | 279.226221967169 | 235.420582508332 | 248.797398220982 |
|         | 230.486681581762 | 166.511915820497 | 190.548265163011 | 197.617554897454 |
|         | 232.019748665806 | 420.401914084346 | 323.095468495074 | 309.06234888929  |
| OIP5    | 146.931674964658 | 122.531570028682 | 56.5402453093703 | 47.5733603903505 |
|         | 224.60637398191  | 64.720130807316  | 225.389113475883 | 175.099998331811 |
|         | 196.034087004464 | 45.7328341667151 | 41.7651272076914 | 45.2783024981315 |
| OIT3    | 37.55264801907   | 30.0771630269067 | 36.9795961564828 | 35.8472302065546 |
|         | 34.0045980663271 | 38.3418933808844 | 38.6243997507646 | 34.6977013306396 |
|         | 35.0305278582179 | 36.9102644736882 | 39.3667161654772 | 36.9976231206067 |
| OKL38   | 83.1614238528477 | 55.9644250454789 | 143.639231185825 | 103.139459009593 |
|         | 67.6011992144113 | 133.798096986107 | 75.164719839017  | 82.0925058822176 |
|         | 87.1471161251724 | 93.2226507128199 | 147.321968565095 | 91.40570426491   |
| OLA1    | 40.0270326792985 | 43.5182502375207 | 42.640829914102  | 41.0273093212371 |
|         | 45.5311794320092 | 42.911855821602  | 42.8684958525042 | 40.5585676679482 |
|         | 39.044540595942  | 40.1179210534118 | 40.6373400186325 | 39.3931655934497 |
| OLAH    | 40.4639532172338 | 44.5884811528117 | 39.3709357615493 | 46.8954576545929 |
|         | 48.0234896130991 | 37.4782441311626 | 41.0381860307445 | 43.844855336215  |
|         | 41.863927676552  | 41.0057887014368 | 40.8225507267584 | 45.4799270968969 |
| OLFM1   | 44.0760877044901 | 51.342502154612  | 39.5450079747895 | 114.25042083587  |
|         | 54.802736966312  | 124.310823604006 | 43.8206425661746 | 62.843734579668  |
|         | 39.853866204927  | 86.2895084312264 | 116.596605311488 | 77.4531387955233 |
| OLFM2   | 45.4799270968969 | 37.5469247328848 | 38.9790184198145 | 47.3574589211166 |
|         | 62.3233491851723 | 44.7804080899431 | 38.2933870238743 | 48.272324215504  |
|         | 34.5633623842083 | 44.1379638573455 | 43.1931731665131 | 37.1747156131306 |
| OLFM3   | 30.9241129241985 | 32.2133093774284 | 35.0970060242246 | 40.1804147506786 |
|         | 37.956732373465  | 35.5158505219112 | 42.357910063876  | 35.5798430594271 |
|         | 36.9060997041453 | 35.3849221682845 | 35.4386677371439 | 33.8196020406676 |
| OLFM4   | 44.4639405506967 | 40.148780650831  | 41.7419877611072 | 67.474556589181  |
|         | 40.5710637884029 | 50.8930565655395 | 153.139323479953 | 748.913487947791 |
|         | 39.0458123429605 | 68.8167148906225 | 47.712616859593  | 39.7844133452634 |
| OLFML1  | 105.802035886293 | 56.463481075522  | 46.9040704638073 |                  |
|         | 80.4007868743886 | 55.9283039581662 | 210.032782918825 | 41.253645578517  |
|         | 66.0303950772736 | 39.853866204927  | 148.964204638494 | 107.222176166001 |
|         | 66.0224755625662 |                  |                  |                  |
| OLFML2A | 173.262440365651 | 173.18824792041  | 192.861174667738 |                  |
|         | 92.999328769924  | 119.572497267498 | 357.347859577591 | 65.8986841086198 |
|         | 107.232979387172 | 85.0162042963215 | 297.332750143067 | 222.8744321245   |
|         | 143.517244617936 |                  |                  |                  |
| OLFML2B | 412.072103136251 | 90.5603308057889 | 92.804679821289  |                  |
|         | 306.895449954881 | 77.4769634299218 | 88.6287852712744 | 59.9792284253187 |
|         | 64.6316818494785 | 49.641159251878  | 70.7805103907761 | 57.2979215534929 |
|         | 52.1186591838715 |                  |                  |                  |
| OLFML3  | 307.656792056993 | 81.6529991377083 | 59.4431489877328 |                  |
|         | 104.528976428975 | 72.4060089486729 | 355.351648424266 | 43.4544762830742 |
|         | 84.607833108004  | 44.1519466943185 | 249.411435337932 | 195.58977358589  |
|         | 131.068763088422 |                  |                  |                  |



|         |                  |                  |                  |                  |
|---------|------------------|------------------|------------------|------------------|
| OLIG1   | 50.8388984085636 | 41.8848959280916 | 40.931294690669  | 92.2530518251152 |
|         | 42.4864576619427 | 42.4580504587581 | 39.2533668167483 | 42.4580504587581 |
|         | 40.3316153483289 | 40.8049408996274 | 44.0409178714232 | 40.8681871019812 |
| OLIG2   | 44.2350046179299 | 45.0905928998779 | 38.2280071951674 | 108.025082988807 |
|         | 36.3390947880186 | 44.7804080899431 | 39.6535880152834 | 39.1652965788406 |
|         | 45.7452456977857 | 36.5806287103157 | 45.7328341667151 | 32.4951076826876 |
| OLIG3   | 46.5549623118323 | 43.3458769998118 | 45.2313723727673 | 47.6687908290818 |
|         | 50.3713170502557 | 39.3841861812262 | 44.0687697278114 | 45.8669209716694 |
|         | 42.7150227340364 | 49.5265949137207 | 36.43924066428   | 33.6902293666089 |
| OLR1    | 225.559405596065 | 83.4951332849212 | 101.403739410832 | 2150.8715161597  |
|         | 102.085154509866 | 60.1042270393382 | 393.648308810931 | 405.852280880924 |
|         | 51.6731332961917 | 70.2565873027242 | 52.5930185400362 | 56.8534370691413 |
| OMA1    | 59.6008106247114 | 108.599492114105 | 109.979856686854 | 77.0774476767901 |
|         | 93.6035786561544 | 98.6825522152097 | 92.0658899997157 | 80.8593396441328 |
|         | 154.509548705054 | 90.1696131791736 | 103.934830132715 | 140.465247047676 |
| OMD     | 89.5687388187015 | 44.6918600441328 | 43.0016969050339 | 50.2163892855092 |
|         | 37.4470183315826 | 302.143385957116 | 43.1931731665131 | 42.357910063876  |
|         | 42.9020321355927 | 126.156748063621 | 83.3729277601518 | 73.5599394565136 |
| OMG     | 37.9387791625384 | 49.4067286971348 | 41.6977706798234 | 37.7469621225553 |
|         | 41.2740822675592 | 38.2293008890613 | 38.0598374201407 | 44.4031868028216 |
|         | 39.7537274655115 | 42.785429206422  | 36.7283081422707 | 41.1554481567603 |
| OMP     | 37.6397652536077 | 38.5252456306656 | 36.0306975524309 | 32.2212308728305 |
|         | 39.3667161654772 | 36.3845892764084 | 39.8695929627783 | 38.079222289614  |
|         | 38.4344387289956 | 42.4594149893798 | 39.3667161654772 | 38.5279745308203 |
| ONECUT1 | 42.466333667839  | 38.4757888225478 | 40.4070046183108 |                  |
|         | 40.9607305725196 | 41.0476065156912 | 39.6609238036815 | 41.706879587091  |
|         | 41.0844534776541 | 46.0633179231318 | 44.1861590259178 | 41.0808257270221 |
|         | 44.0451487108213 |                  |                  |                  |
| ONECUT2 | 43.9463645143593 | 82.2766822827861 | 42.381482941987  |                  |
|         | 41.3027031037343 | 43.1847628331565 | 39.9711455493143 | 44.1407835440612 |
|         | 45.3530683538086 | 64.5044423866259 | 41.3789451344719 | 42.0519977525156 |
|         | 39.7411455670172 |                  |                  |                  |
| ONECUT3 | 44.0328992213727 | 34.8137085420423 | 38.4043916290561 |                  |
|         | 42.357910063876  | 40.4639532172338 | 42.157627240486  | 45.7452456977857 |
|         | 40.047314525032  | 40.9901805728485 | 40.4136535208406 | 38.8507804383261 |
|         | 42.9887069977696 |                  |                  |                  |
| OPA1    | 101.727569033016 | 103.356071080819 | 82.3768788448119 | 76.6232527679845 |
|         | 126.670728021682 | 116.066916521887 | 102.220824629896 | 83.9760574088975 |
|         | 98.4156120426377 | 97.7620313090597 | 110.334176022265 | 99.8277095030346 |
| OPA3    | 48.5123041297835 | 49.8666125578518 | 51.1721071708252 | 49.8304479381623 |
|         | 69.7780295683996 | 50.4882744710823 | 44.2630383225933 | 43.1567024035183 |
|         | 49.2172346679677 | 44.7401523707775 | 44.2425127397963 | 48.6395795163502 |
| OPALIN  | 38.7537364570873 | 38.957687788868  | 38.5442780220289 |                  |
|         | 44.3440839686558 | 38.6213341190836 | 40.7616966228404 | 40.8681871019812 |
|         | 39.2672712041774 | 36.4816715148518 | 38.528621456378  | 41.8168470823451 |
|         | 43.0322714179517 |                  |                  |                  |
| OPCML   | 40.3478825593224 | 43.896638326678  | 46.4150464549477 | 44.9370339275041 |
|         | 49.2267897689452 | 45.4882438975269 | 48.0283573444179 | 46.695848687694  |
|         | 42.8036731479932 | 43.8943892311541 | 44.7114813656401 | 48.5123041297835 |
| OPHN1   | 40.9558083259517 | 40.8880530359822 | 44.5134109184888 | 43.3078542962968 |
|         | 51.5888395924843 | 51.0506441018166 | 46.0228732507872 | 46.2779564481158 |
|         | 46.1101825640108 | 47.611018474151  | 49.8393069675192 | 49.9692385479389 |

OPLAH 45.1912496459517 263.53897660224 86.6186787663248 83.014860007187  
148.42234459694 65.025238127962 88.6663961027926 94.080489738662  
88.7605288058249 74.8706881113318 74.6847594297153 60.162766751307  
OPN1LW 36.9060997041453 36.89524015739 44.8872784170036  
57.0629653735694 41.467005949568 35.7034203372528 38.7337086062875  
47.2009420656854 38.2215591930186 41.1222709786153 39.3667161654772  
36.8690774823319  
OPN1MW 40.0557788909923 41.159706131351 42.5864346233886  
40.0322420615846 42.3536549114165 38.2293008890613 43.2721716572958  
42.7965563818112 45.4799270968969 39.9948390976317 43.2551508830106  
42.7275315121163  
OPN1SW 41.2424637338424 40.9731067463382 39.1799070031819  
43.8002456102021 42.1650127805175 42.750861693377 41.8315602975157  
40.5158867964016 43.0930293831497 43.0919221375514 39.9070785037411  
46.0633179231318  
OPN3 89.6670947876322 56.8875898013449 92.5011103881887 118.316810638061  
54.0584200960756 51.0506441018166 58.1756711200038 67.8828234986518  
60.9594847577747 43.2484996523549 48.2910530887214 63.9869572942624  
OPN4 38.0648056183784 43.896638326678 39.3709357615493 44.4912617551615  
37.956732373465 40.3357777530419 43.4544762830742 39.0620487644635  
39.1790517315259 43.0919221375514 39.6833800000587 38.9496515344837  
OPN5 39.8234920704779 40.0527893189096 41.785676764591 38.7879667686732  
35.2163900400329 42.5660695551615 40.968974769473 41.4812544772644  
44.1519466943185 42.4393920571519 42.5023941254529 43.6753843488695  
OPRD1 41.1523487516364 41.8073910693411 41.785676764591 42.6913548400127  
42.7982502551634 39.132725377815 37.6036146841933 45.3872406432794  
40.5912213523345 42.6793753550854 43.844855336215 41.0657892043496  
OPRK1 47.5647821785529 47.6229101519945 52.2132783757422 44.0451487108213  
44.3557408297309 45.0882356578404 48.3411413510851 46.7980335276155  
48.5792058061372 51.3351387089044 43.6629145624937 47.9566297250148  
OPRL1 41.8772051675749 41.690833180291 41.528370959196 41.8778873678551  
41.9397336249742 38.9598062634954 39.6535880152834 42.9845402973781  
43.0990926708606 35.4990901121893 42.3474554878621 40.9250062559315  
OPRM1 38.9152309941518 41.0311375543994 43.7085219318425 42.1679276329916  
42.9090346219023 39.9763752848782 41.4742337714895 40.7739154311451  
44.4665804920061 40.6587055101945 44.5264064957804 42.171601283248  
OPRS1 76.9671788424922 84.9756044280631 63.7744603935682 54.5222652584532  
103.720371491639 80.8983886669775 80.5981334271235 81.5582217750731  
77.3864518736634 85.0852996855365 81.7500436717038 82.3591293655947  
OPTC 46.5549623118323 44.2105195734073 43.6670755115848 45.7397504535169  
42.269054475455 39.0266821712099 44.4639405506967 43.4544762830742  
45.1899271235974 44.1379638573455 42.0750889188255 38.8495095797881  
OPTN 277.665554240228 151.255948388415 166.188557509096 247.723546145775  
89.737418965763 576.367042159347 181.381479219186 240.696431900526  
140.78326016606 381.6928205836 395.298033031033 320.330057050615  
OR10A2 35.3227485563945 41.554942319225 38.4043916290561  
38.745552403895 42.4864576619427 41.6590564937735 34.806104801006  
40.4359177791566 37.7384958256497 40.3235655331796 40.8225507267584  
35.4484652445078  
OR10A3 33.9561816279577 37.2810767789306 40.0998167098057  
38.9534635879195 35.7973685350741 37.9003288112261 32.2796484885898  
37.86982638952 42.5406888281114 40.4136535208406 42.357910063876  
37.9607839934735

OR10A4 34.9138625012006 40.4359177791566 41.6977706798234  
40.646702696033 40.2449343247539 35.7034203372528 38.8417151851134  
44.1311654985682 38.5252456306656 43.844855336215 39.5399188536544  
42.1537476443423

OR10A5 31.3422392302759 32.0823591288671 32.1218888714537  
32.2212308728305 37.3508690072156 39.7394181011603 36.5352572191451  
42.2577689927563 33.0463640202858 36.1550293353654 32.775958132716  
35.4484652445078

OR10A6 47.7267190613906 40.148780650831 41.8751578329365  
40.646702696033 36.8059561571675 42.9695585740813 35.4623691645629  
41.7419877611072 37.6383530120621 38.0078357808393 43.0016969050339  
38.745552403895

OR10A7 38.385865183581 44.8529259387308 37.1643693306382  
37.8442841690502 38.8456942580061 45.6129956328415 45.3597029614942  
39.3709357615493 45.6582729799009 38.8507804383261 39.9070785037411  
42.57175366709

OR10AD1 38.8561375693335 39.9697332660833 40.4882741869718  
41.7614975630362 41.0885562160946 35.6125439901743 36.5352572191451  
37.7612949798895 39.9444191873552 38.2069499294002 44.2925355984056  
38.745552403895

OR10AG1 40.4639532172338 39.6995529770239 41.2365089689635  
34.7266486944713 38.4540849632254 48.3686935595826 40.4359177791566  
40.931294690669 42.992884918158 39.7835513496873 41.3553369544097  
39.5418280570561

OR10C1 41.8409927585705 38.8336427948187 40.0998167098057  
42.8235313007746 36.6354013629791 39.2985791324641 41.3594868055879  
40.047314525032 40.2274522635576 38.1042454705119 39.2542963855807  
38.3291713594599

OR10G2 39.5676051939342 38.2263227947189 43.5710871617107  
42.8235313007746 39.6535880152834 40.7616966228404 41.706879587091  
37.33030683349 36.2733735494625 43.1839109702714 42.357910063876  
39.8497227447888

OR10G3 43.7585538437696 36.6002100641539 43.0971787292711  
39.853175885492 44.4489662507893 43.0860383229288 41.9393838138203  
34.2814697823693 46.6944238390932 38.6454098044474 39.2542963855807  
40.8681871019812

OR10G4 43.7585538437696 43.0971787292711 43.401782064778  
39.3750969348308 36.9702228618069 37.7000400506818 35.7055410599146  
33.4534810696886 35.4332080966594 41.4397539024976 44.2142581488029  
43.4709415392696

OR10G7 41.5421429082231 40.5400384479766 43.5710871617107  
48.9944486068347 41.0885562160946 39.3841861812262 41.253645578517  
40.931294690669 44.7058233759912 43.6033221838149 41.7272875295469  
40.6614700944853

OR10G8 39.7576136507593 41.0678614026819 40.4070046183108  
43.8002456102021 43.9450023643394 40.4359177791566 32.4466419672036  
38.4540849632254 39.0775870687758 38.6454098044474 41.1638563416981  
38.0452862258803

OR10G9 44.0328992213727 39.9697332660833 41.785676764591  
37.8442841690502 38.745552403895 36.0306975524309 40.4359177791566  
37.6557714476853 38.4344387289956 32.90036444440608 40.4504608195666  
44.4475838947656

OR10H1 37.9387791625384 31.0594903826598 46.3411353377615  
38.6414316877471 34.3633615460307 38.1169703906207 40.0052661202207

41.2551966132486 37.5469247328848 31.5892202809227 35.6970528713709  
39.1553169409075  
OR10H2 36.5393857306744 41.9894412416874 34.806104801006  
34.2080003860523 39.2608760193011 35.314469458379 34.3633615460307  
36.43924066428 33.6288663955758 33.6902293666089 33.4071187618571  
32.8921051249019  
OR10H3 39.1590964332473 42.5269793679335 40.1985790927248  
41.5464765641928 39.0564222526273 37.8102105794655 42.8684958525042  
44.7044140979108 35.4332080966594 36.9102644736882 39.6403089864678  
40.1700117452801  
OR10H4 37.5100503181769 38.8336427948187 43.8495248991589  
39.853175885492 42.4864576619427 39.2248354955045 37.7555770011351  
39.2672712041774 39.7162631015511 41.3321861371202 37.7384958256497  
40.9149601380325  
OR10H5 39.4250105372135 41.4508241771315 39.7697110924474  
42.0621425894624 40.7273974755431 39.4953494583071 51.4349390827895  
37.4484310268909 44.2607789091176 40.3235655331796 38.745552403895  
43.4709415392696  
OR10J1 43.4626049853157 39.2542963855807 42.8723769353017  
46.2462906014337 41.3387790895716 45.0283997415478 42.629412460409  
40.8833572570383 41.1742244762318 39.0648733099061 41.3945375181463  
43.4290452504928  
OR10J3 38.1169703906207 44.2105195734073 39.5450079747895  
40.8681871019812 39.1650142708257 45.1873487463472 38.5066108855005  
38.2782436497441 37.7384958256497 40.5090849993014 41.7272875295469  
42.357910063876  
OR10J5 38.0089018744739 38.3322849790657 38.1421709520616  
50.378948785456 42.3685136297603 42.8598805316863 44.7255207589606  
43.6434576713809 43.0930293831497 38.6454098044474 45.6348103033479  
39.1553169409075  
OR10K1 38.1169703906207 37.920964499903 42.7303139017786  
38.9534635879195 40.3452320167286 38.9378717994178 40.2154497375715  
42.5435283762933 37.8319142847141 36.4651112441576 36.2435874904689  
34.6720534245631  
OR10K2 46.441301934328 39.7835513496873 34.3633615460307  
35.9521941716188 37.3508690072156 41.159706131351 39.2533668167483  
36.5393857306744 40.6957787921451 43.401782064778 38.2795150354677  
38.1421709520616  
OR10P1 36.3649677956953 46.8236022402545 43.3085358214154  
41.4273122914951 40.7779767565889 40.9506062495231 40.2154497375715  
37.2237132058632 44.619512785899 41.9666541498638 40.547835538778  
43.4709415392696  
OR10Q1 43.7585538437696 35.0222940937513 37.8386378737561  
39.2780515621926 40.148780650831 40.9506062495231 35.2163900400329  
36.0306975524309 36.6312676076142 40.8049408996274 40.3452320167286  
37.4554876386402  
OR10R2 40.2543341073001 39.6995529770239 44.5134109184888  
41.7614975630362 38.4540849632254 42.9695585740813 39.2533668167483  
34.5886782974123 38.1169703906207 38.0078357808393 43.1931731665131  
47.3172462673426  
OR10S1 46.0920218698606 41.9894412416874 36.178547300352  
41.4273122914951 39.3667161654772 45.8325181856483 41.9393838138203  
42.157627240486 43.8482802038826 41.2276963324981 37.0180934800573  
48.8670821164567

OR10T2 40.4639532172338 34.5023764006976 39.991353369336  
40.646702696033 35.3327761997046 46.6872654833579 40.3302268293707  
38.2782436497441 36.0741672064298 41.8613406887824 37.2018803984555  
35.6427313468066

OR10V1 40.148780650831 39.8695929627783 44.9758339877851  
41.0726336841311 40.3452320167286 34.8956628705329 38.6243997507646  
35.9023742468744 33.4698406117406 36.8059561571675 39.3667161654772  
40.4639532172338

OR10W1 40.5235471987417 37.8217989841918 43.4709415392696  
41.8778873678551 42.8510579683751 38.2971553419489 38.941855825269  
45.4757965005055 41.7233690251839 44.7520317855773 40.3452320167286  
41.6031169661721

OR10X1 36.6480005877129 37.7384958256497 40.931294690669  
39.066284740632 38.8456942580061 37.5887129572848 39.7576136507593  
39.4710743516517 27.4352294118391 37.4302011516587 35.5179217192467  
38.9496515344837

OR10Z1 36.4564050256915 42.3550738181144 45.6989664108554  
49.1786207920603 37.4470183315826 41.2567470068038 41.8315602975157  
43.844855336215 37.6383530120621 40.1179210534118 41.9908237694988  
37.6557714476853

OR11A1 40.4639532172338 41.159706131351 39.3709357615493  
40.1249533205858 46.0493141231657 42.281606728072 44.7958122466628  
44.8997235283254 45.0997987980157 45.4882438975269 43.9063490244748  
42.9887069977696

OR11G2 41.7397731376692 42.4493032770053 37.2838080935695  
40.9607305725196 46.3150221024046 38.9378717994178 39.8695929627783  
52.3068458655445 40.2274522635576 45.9004543328976 44.4688999098904  
49.2064066614865

OR11H1 38.8406533304174 40.0952076421149 39.2388980107385  
42.4061338151892 41.5377280911418 38.8336427948187 39.4916414839923  
40.2819379659218 44.0256815382334 43.0177448037924 39.0788811357542  
42.7782216342806

OR11H12 42.6036491382658 36.1689925825846 41.3708420203838  
38.6835649080278 41.0885562160946 41.3094485574845 38.2280071951674  
36.6968906669565 40.3316153483289 38.745552403895 39.6403089864678  
40.6614700944853

OR11H4 37.7384958256497 39.2907645923217 35.6139301508335  
38.3166554965434 40.148780650831 45.7300501624017 38.5066108855005  
38.956280281655 46.581796165231 39.4710743516517 39.153226699662  
38.745552403895

OR11H6 40.8681871019812 36.6968906669565 49.7350276169552  
42.6913548400127 42.269054475455 37.2686490268265 40.7910160811527  
40.2382908228517 38.5252456306656 36.3612409063792 42.4580504587581  
44.2527566343661

OR11L1 44.2350046179299 57.5941849631773 90.5553202429233  
47.3574589211166 54.1225249245036 63.2343637481705 45.7452456977857  
50.628152951493 60.164635768614 66.8026147385682 74.280612516205  
58.6481644777552

OR12D2 46.0023068797812 39.0102066700839 42.640829914102  
43.9282059368202 40.3452320167286 39.7394181011603 44.4639405506967  
41.9315419791594 39.7537274655115 38.8507804383261 41.0808257270221  
37.8490162439785

OR12D3 38.0648056183784 37.10170285405 38.0958223740111  
38.9934686082455 41.2424637338424 40.2945586900975 40.4967168818294

39.2672712041774 37.10170285405 36.2435874904689 38.5252456306656  
35.8108713625055  
OR13A1 42.7150227340364 65.5367689605146 58.637422084759  
51.0175677516029 51.7983110178095 41.3553369544097 68.1125016199524  
47.4740726032707 56.7991853808475 103.808640431626 66.8188271427672  
57.3697604614404  
OR13C2 36.2496364442264 36.6002100641539 36.1042012504758  
39.6292788039793 39.1650142708257 38.8336427948187 35.7055410599146  
39.6474008369935 38.6322728994674 45.3530683538086 41.2598458726002  
41.7575097298927  
OR13C3 41.9407041937973 39.3999056968598 36.0306975524309  
44.1483976313959 40.8873907150245 38.7340969861754 35.9894133432376  
39.5466975353131 40.137818555383 38.528621456378 37.0180934800573  
34.806104801006  
OR13C4 46.5549623118323 39.7835513496873 38.3166554965434  
36.4564050256915 41.1868052124344 37.4782441311626 42.9803717121865  
41.7419877611072 39.7537274655115 37.7315666632629 39.3667161654772  
44.3521099857368  
OR13C5 40.7609952437622 39.1982470626863 38.1421709520616  
44.4367387274922 38.3561682218911 38.6414316877471 41.3594868055879  
44.7044140979108 41.863927676552 44.571915452417 41.1638563416981  
41.2437378488025  
OR13C8 39.8662795144616 36.6002100641539 35.9305494063137  
36.1562979552173 47.4548471240051 39.8455060654531 44.4639405506967  
38.4540849632254 43.7630587657205 42.4594149893798 42.5426057453993  
42.4607795638552  
OR13C9 40.9558083259517 37.958111840848 37.9003288112261  
39.066284740632 38.8456942580061 40.7063426028871 36.2561152084183  
38.6088282130727 42.9413736814915 39.8455060654531 46.29198852834  
39.3575468494941  
OR13D1 29.2731027042641 37.7384958256497 43.0971787292711  
43.074472921841 39.9697332660833 35.2067831864574 36.197424053556  
37.5511560880902 38.3418933808844 36.5806287103157 36.2435874904689  
39.7411455670172  
OR13F1 41.9407041937973 41.0678614026819 42.0621425894624  
34.5425384901279 36.4434672195785 41.0582900711341 41.1507980856436  
36.1375121409002 39.9444191873552 40.4136535208406 37.8372168909583  
41.2437378488025  
OR13G1 44.2350046179299 44.5152708955623 43.0971787292711  
39.3750969348308 43.1252272136667 42.6575535390785 45.4799270968969  
39.6474008369935 42.9020321355927 42.5664883002833 45.0589947942306  
35.2448979801094  
OR13H1 41.2424637338424 45.4882438975269 41.2365089689635  
36.3604951341921 40.9950639693255 43.3785777889265 38.7337086062875  
41.9315419791594 41.2870505273664 39.2623423164488 40.6373400186325  
44.5432192783161  
OR13J1 42.6036491382658 43.4396866157171 38.2280071951674  
39.853175885492 44.4489662507893 38.8336427948187 36.08956004634  
34.806104801006 42.2577689927563 37.920964499903 36.7283081422707  
42.357910063876  
OR14A16 40.4639532172338 39.8695929627783 36.4564050256915  
48.856176220627 37.0526522140242 32.5219627196161 51.0013344286851  
36.3405039629059 42.9020321355927 42.6793753550854 37.0180934800573  
40.9683275553869

OR14C36 43.4626049853157 42.2577689927563 42.3536549114165  
43.5627649099623 41.8806343997257 38.5252456306656 40.9157352260901  
37.6557714476853 39.7537274655115 47.7180816682562 37.2018803984555  
34.6720534245631

OR14I1 35.6111578834671 35.4484652445078 35.4484652445078  
37.9875302985336 44.2607789091176 41.2567470068038 34.806104801006  
41.9315419791594 40.5912213523345 36.8059561571675 37.8372168909583  
44.5432192783161

OR14J1 39.0620487644635 38.2263227947189 40.1985790927248  
47.9915414951747 39.7568367479301 44.7804080899431 35.6056062164318  
43.1567024035183 37.9273653326866 41.8613406887824 37.9230440150891  
42.2577689927563

OR1A1 38.2083710281545 43.3458769998118 39.991353369336 43.1847628331565  
42.269054475455 39.9397419279057 41.4742337714895 44.2159020605784  
46.8873421271259 41.3321861371202 37.1059647239814 42.1537476443423

OR1A2 42.5193208629123 39.6123051184545 43.401782064778 37.8442841690502  
43.3332476888305 42.8598805316863 38.4005795891396 39.2672712041774  
38.2215591930186 41.1222709786153 41.2598458726002 45.4799270968969

OR1B1 41.5421429082231 35.2143190355414 37.9482157381008 37.0732977341185  
40.4639532172338 43.3785777889265 38.2933870238743 38.1835938174625  
43.7630587657205 39.6719190054379 44.7926323492519 40.2669497398702

OR1C1 39.1590964332473 46.5650556481721 42.4580504587581 41.6564075217517  
47.8075998240396 38.8336427948187 39.2533668167483 38.3684202018524  
42.7150227340364 47.0055981216687 45.390192977585 41.5536168238478

OR1D2 44.3355304829989 42.4493032770053 38.7745734037492 38.5252456306656  
40.9950639693255 40.040778349137 46.5650556481721 48.7814131120945  
39.9444191873552 42.3606390470387 37.9946685306274 42.357910063876

OR1D4 41.6698172204688 41.3177250076876 40.8420925848403 40.9022255200169  
40.5207392413115 38.9675540212675 39.2114264935239 40.5158867964016  
42.7606905460304 40.8600431177315 41.6336636285875 38.5279745308203

OR1E1 41.9407041937973 43.0971787292711 41.0356368374708 38.5252456306656  
37.8679241954337 40.4359177791566 42.9803717121865 34.806104801006  
40.5912213523345 39.7835513496873 40.2649309204478 34.6720534245631

OR1E2 40.018129854 38.7344853699576 41.785676764591 45.7397504535169  
41.3387790895716 37.5469247328848 39.2010256871265 38.4128104869434  
37.6383530120621 43.2988017098387 42.5086338413299 37.6557714476853

OR1F1 38.5007204246293 39.1982470626863 42.640829914102 35.7674462337723  
39.9697332660833 39.2248354955045 40.5585676679482 40.1474543172332  
41.5635499110307 40.3235655331796 41.5421429082231 37.4554876386402

OR1F2P 40.3478825593224 45.4143854024453 48.1331309338997  
41.1886975241176 40.7779767565889 43.5752393599169 41.8315602975157  
44.4031868028216 42.6366765186182 38.4187686307607 40.0766543123257  
37.5556299264699

OR1G1 39.266565827316 40.3384318592985 48.8941062980393 52.5307002738469  
42.0709558258414 39.3841861812262 38.941855825269 41.3506832276112  
47.3791873993182 43.844855336215 43.0971787292711 43.9541718254769

OR1I1 37.4554876386402 36.0366673493555 36.178547300352 39.2780515621926  
31.8228237796461 33.6859433472087 39.3585350448719 35.4526946152955  
38.8271346375425 44.1379638573455 37.2892641289258 35.1451084093692

OR1J1 49.8304479381623 42.1372626664516 43.0016969050339 46.7577982595088  
43.4544762830742 44.5544727111028 45.6706505553383 49.8666125578518  
47.1744296124496 49.2317401696588 42.8742421276144 46.4136802014079

OR1J2 43.844855336215 36.7976562409506 40.6737160001291 44.1483976313959  
40.6723334103791 42.0574848021044 39.8695929627783 42.4580504587581  
46.3203995372658 41.7405682794166 43.7585538437696 43.2776458914333  
OR1J4 34.0467249875782 45.4882438975269 38.3166554965434 38.2041059863839  
44.2607789091176 44.2607789091176 43.4544762830742 42.2577689927563  
41.7627910693483 45.1569741609597 40.9157352260901 40.4639532172338  
OR1K1 42.0532901689036 36.89524015739 44.5134109184888 45.8844325913247  
42.1650127805175 44.7804080899431 41.3594868055879 41.4508241771315  
34.5633623842083 38.528621456378 37.6484782516569 40.2669497398702  
OR1L1 39.6609238036815 36.0366673493555 35.2838283525874 36.4564050256915  
43.844855336215 41.0582900711341 38.7337086062875 36.43924066428  
36.2733735494625 43.844855336215 42.7275315121163 37.5556299264699  
OR1L3 35.5179217192467 34.15544299189 40.1985790927248 39.2780515621926  
39.9697332660833 38.2293008890613 39.3585350448719 36.8400213077707  
38.9834959368496 34.3674468322242 42.7275315121163 36.3454320848591  
OR1L4 42.1679276329916 42.5269793679335 44.696023817801 43.4410741327254  
45.2556760873335 45.5758521267508 41.1507980856436 42.0494116081998  
41.9083581529276 44.3187284857534 46.4451625524549 41.5536168238478  
OR1L6 31.9222834447339 36.7976562409506 40.301483914446 35.8472302065546  
34.9062568194127 41.3553369544097 39.3585350448719 35.7973685350741  
39.6609238036815 38.6454098044474 40.1742127891824 39.4490233720848  
OR1L8 42.8036731479932 42.1607322031054 40.931294690669 39.2780515621926  
43.004943518025 41.0582900711341 41.4742337714895 41.1575777497576  
31.0594903826598 43.7303813515864 42.357910063876 45.3763275588341  
OR1M1 40.2543341073001 44.5884811528117 42.4580504587581 36.4564050256915  
37.6527901109005 37.7000400506818 44.2166118829877 39.0620487644635  
42.5406888281114 43.844855336215 43.401782064778 37.6557714476853  
OR1N1 39.266565827316 40.8880530359822 47.4740726032707 41.8778873678551  
43.1252272136667 42.750861693377 37.3799542961839 46.4672637826582  
37.6383530120621 42.5664883002833 46.2560238004757 39.9519547348106  
OR1N2 41.2424637338424 42.4493032770053 42.157627240486 41.3027031037343  
44.2607789091176 41.7627910693483 40.5585676679482 34.3865306339645  
40.2274522635576 44.3648993568405 41.1638563416981 42.357910063876  
OR1Q1 39.1590964332473 38.9338521051669 41.9666541498638 41.5464765641928  
43.1252272136667 37.4782441311626 50.0088611244948 42.8482181313226  
41.5635499110307 37.5343260962758 43.4709415392696 35.8429598823818  
OR1S1 35.6434124419782 43.3016395799961 41.0356368374708 42.281606728072  
41.5668884168669 39.9777866059804 41.0381860307445 41.9315419791594  
41.3468610075772 38.6454098044474 39.0550139257658 36.72060634973  
OR1S2 41.7397731376692 38.7344853699576 42.2577689927563 40.5858746708995  
43.1847628331565 40.650742261428 44.1407835440612 39.6474008369935  
40.7847110517594 45.7911932481722 42.6776449468246 37.5222959113204  
OR2A1 51.540723788287 48.551327455445 57.8715555065641 42.8848887336829  
47.3172462673426 43.7630587657205 47.5130990528612 43.3262148375525  
44.1519466943185 49.3654837541353 47.712616859593 43.5420658412177  
OR2A12 37.8386378737561 41.8073910693411 33.281531405287  
47.0874209746031 38.2496050953547 34.4896350146096 38.8417151851134  
38.3684202018524 38.5252456306656 32.7131023641972 36.9060997041453  
41.4508241771315  
OR2A14 44.1294459089314 35.3307157989724 35.7105247506212  
40.4359177791566 40.2449343247539 44.2607789091176 34.806104801006  
38.6454098044474 43.4656637536244 43.2988017098387 39.153226699662  
42.57175366709



OR2A2 36.8072833828297 41.4508241771315 43.9450023643394 42.6913548400127  
46.5557478175976 40.244271403831 40.7910160811527 42.357910063876  
44.4395580493118 39.4710743516517 40.3452320167286 49.8253396161069  
OR2A20P 44.8914371498528 46.8603024029835 49.2595762436995  
51.2973486610884 42.5449473689701 41.809704036355 42.810624012519  
41.7419877611072 46.4569566520107 47.2299678280724 40.6373400186325  
47.7508139534968  
OR2A25 39.7576136507593 36.7976562409506 41.785676764591  
33.0463640202858 38.745552403895 37.0180934800573 43.3262148375525  
34.3865306339645 46.0106098064475 33.2987269789328 41.1638563416981  
37.3600014814388  
OR2A42 42.9641759692926 44.4411734611229 43.401782064778  
39.7901937802774 40.7273974755431 42.2114134935898 47.5130990528612  
37.86982638952 46.6944238390932 40.8049408996274 43.7585538437696  
39.0536056496869  
OR2A5 44.7915315085948 46.8236022402545 41.437237454134 57.4595416719581  
56.9360840563854 56.0477607422828 48.0283573444179 57.9713749600418  
52.6561576154021 44.3648993568405 48.2050207071554 48.6795178347248  
OR2A7 42.0532901689036 41.7614975630362 42.157627240486 38.3166554965434  
43.5836473788312 35.5523662009011 38.6243997507646 40.9861485852278  
44.6717213146407 41.2700204291848 46.3370338074996 44.7871262003648  
OR2A9P 54.7105548454293 59.4674205670657 63.9148277361329  
40.646702696033 64.8367546135053 45.1873487463472 53.7423898357583  
56.2441895183416 61.3733228199803 63.8357465390633 62.8753829543444  
61.1022920882065  
OR2AE1 38.385865183581 39.0102066700839 42.157627240486  
42.1273928203021 35.9058393060637 40.1428591998404 44.6032218589199  
39.7509165247419 44.8003345643334 36.5806287103157 39.153226699662  
35.6427313468066  
OR2AG1 38.5648843914189 40.5400384479766 39.7411455670172  
42.2496337895968 36.4434672195785 44.0804700754786 47.5963750520409  
49.2901038327894 43.2761454096265 38.957687788868 35.2339574411711  
44.7401523707775  
OR2AG2 45.3872406432794 44.2630383225933 43.0971787292711  
45.334106390212 40.9950639693255 44.6524308640784 34.5633623842083  
38.3684202018524 41.2870505273664 39.0648733099061 42.7275315121163  
41.7575097298927  
OR2AK2 39.7576136507593 46.5650556481721 36.6522278218553  
39.7411455670172 39.0564222526273 39.2248354955045 35.3362091871364  
40.6171774724171 43.4656637536244 42.6793753550854 37.4642807402741  
39.2469742642337  
OR2AT4 29.8304689114955 34.7135536792489 43.0016969050339  
37.29566077996 42.1650127805175 36.4986986135769 43.5627649099623  
35.5798430594271 37.5469247328848 41.2276963324981 37.6484782516569  
44.4475838947656  
OR2B11 33.8558232866797 41.2598458726002 43.0971787292711  
38.3166554965434 39.0564222526273 38.6414316877471 39.6535880152834  
38.5457716679071 38.0213051227859 34.1648535095605 39.7342718293432  
38.6454098044474  
OR2B2 49.085741080241 34.8137085420423 43.9450023643394 41.0726336841311  
40.9950639693255 41.2567470068038 40.3302268293707 40.931294690669  
41.4636047919453 50.8826620053386 46.5650556481721 46.0633179231318  
OR2B3P 41.0608773166058 41.9455842688118 42.2837084302963  
39.5637454855233 44.8897737954573 44.8872784170036 41.8315602975157

42.9887069977696 41.1349567921107 38.7008388965825 43.8002456102021  
42.0424641526302  
OR2B6 69.4501305462809 38.4330755397458 40.301483914446 43.9282059368202  
69.8804970538895 47.8636003588181 43.6753843488695 51.555506218204  
39.1790517315259 41.9666541498638 40.2649309204478 41.4508241771315  
OR2C1 41.0608773166058 36.7976562409506 38.6005272730664 45.0798408927912  
36.4434672195785 42.157627240486 33.9750800030909 38.956280281655  
38.3418933808844 34.5718473203083 37.9230440150891 39.9519547348106  
OR2C3 42.3433931248155 39.8695929627783 41.1367478979484 40.7481155008596  
36.9060997041453 29.745266251498 37.1643693306382 35.4526946152955  
36.5393857306744 38.528621456378 40.723990462047 39.2469742642337  
OR2D2 41.9407041937973 41.8073910693411 42.4580504587581 46.3203995372658  
49.7235523248653 42.0574848021044 42.357910063876 41.0381860307445  
45.0997987980157 41.2276963324981 37.7384958256497 40.4639532172338  
OR2D3 37.0320432433314 41.8848959280916 41.785676764591 42.5664883002833  
42.7982502551634 41.2567470068038 40.5585676679482 46.3685439301234  
38.4344387289956 47.1001757441025 40.3452320167286 36.9976231206067  
OR2F1 41.8409927585705 36.6002100641539 36.5474283500601 44.265834798964  
39.859345745831 38.5252456306656 38.941855825269 45.0972184964705  
44.2607789091176 40.8049408996274 41.1638563416981 44.5432192783161  
OR2F2 39.6609238036815 39.6995529770239 42.0621425894624 37.29566077996  
41.6806984441849 44.5544727111028 40.4359177791566 38.4540849632254  
42.5406888281114 43.401782064778 40.723990462047 33.4316681623175  
OR2G2 42.0532901689036 40.2493681589104 36.5474283500601 38.745552403895  
37.6527901109005 35.2067831864574 29.2731027042641 34.806104801006  
49.0986627051784 44.8997235283254 39.0550139257658 41.5536168238478  
OR2G3 41.6354649482853 47.015085768072 40.7620472083159 41.7144525110048  
43.4885245598939 44.7804080899431 39.7576136507593 41.6466169548846  
42.5864346233886 41.1222709786153 43.3085358214154 44.5432192783161  
OR2G6 39.5676051939342 40.5400384479766 41.437237454134 38.2041059863839  
34.806104801006 40.4359177791566 39.1539892144371 44.5029690493211  
36.9060997041453 42.5664883002833 38.8507804383261 38.9496515344837  
OR2H1 37.2474303302343 36.0366673493555 38.2280071951674 37.5382094267692  
36.3390947880186 37.2686490268265 37.2892641289258 39.853866204927  
37.3600014814388 32.7131023641972 35.7953070087288 34.2141875904985  
OR2H2 39.266565827316 41.3610369241157 42.8270038153139 38.4208429103799  
45.1137938810047 46.8954576545929 57.4047331041592 45.2806199505029  
46.7760357462635 50.1649089793069 39.5399188536544 44.4475838947656  
OR2J2 40.3478825593224 44.1239711172417 42.2577689927563 42.6913548400127  
44.9936360641969 39.3841861812262 40.5585676679482 40.931294690669  
39.4762546236449 39.8873706855774 39.8184668132023 37.4554876386402  
OR2J3 39.9697332660833 38.3322849790657 41.6079958749402 42.4580504587581  
40.6723334103791 42.0574848021044 39.1539892144371 37.33030683349  
42.0621425894624 37.1275334308172 39.4410515050885 39.6352613956998  
OR2K2 37.4554876386402 38.4330755397458 42.640829914102 39.5050383901884  
41.5668884168669 37.9951997351435 40.7910160811527 36.9355798143571  
38.2215591930186 35.195364621675 38.3684202018524 41.5536168238478  
OR2L13 41.483412492426 40.0952076421149 37.5597671487621  
41.6045220683604 38.7864161493321 38.9378717994178 38.7337086062875  
36.1375121409002 46.3203995372658 39.8873706855774 41.4860822396574  
39.8497227447888  
OR2L1P 39.3100256336821 37.5469247328848 42.8723769353017  
44.1483976313959 38.0170438383012 37.5469247328848 41.0381860307445

36.9976231206067 37.5469247328848 36.8059561571675 39.3789825717286  
 38.4330755397458  
 OR2L2 39.7576136507593 38.6414316877471 34.8956628705329 42.5664883002833  
 39.0564222526273 41.554942319225 38.0598374201407 33.7818132446042  
 36.9060997041453 37.3179578037963 35.6041926503637 42.9887069977696  
 OR2L3 42.3433931248155 40.2493681589104 43.401782064778 42.0102671859606  
 44.8897737954573 42.2577689927563 45.8980298854198 42.4580504587581  
 42.1594905198929 46.7646877499666 44.4688999098904 46.6397391251762  
 OR2L8 39.8662795144616 35.4484652445078 45.8844325913247 45.1944222548351  
 36.8059561571675 37.8102105794655 41.8315602975157 48.1591264215184  
 35.4332080966594 42.1622837416589 37.8372168909583 39.7411455670172  
 OR2M1P 44.5798743103596 42.2114134935898 47.5673419710251  
 41.7144525110048 40.148780650831 41.7256940298128 40.4967168818294  
 41.4508241771315 39.2497056720346 44.1861590259178 39.0061493066838  
 42.57175366709  
 OR2M2 37.2474303302343 40.9731067463382 41.1367478979484 40.1804147506786  
 38.745552403895 38.7340969861754 44.9863726205428 33.7818132446042  
 42.9020321355927 40.7063426028871 44.6286581923295 41.7575097298927  
 OR2M3 42.2618615571566 38.7344853699576 45.310660704531 43.9282059368202  
 43.8835874380262 46.3715909653832 38.8775560911841 44.5029690493211  
 45.7873395324682 42.9866214102525 42.170702295259 42.6758568421347  
 OR2M4 39.8662795144616 38.7344853699576 43.7630587657205 33.4240466670776  
 41.5668884168669 42.5660695551615 37.7136011474903 42.157627240486  
 40.7847110517594 37.0320432433314 37.3687900733549 36.1647506311964  
 OR2M5 40.2543341073001 38.8336427948187 37.5597671487621 38.6414316877471  
 40.4639532172338 43.6670755115848 38.4005795891396 46.695848687694  
 45.6582729799009 44.6918600441328 37.0180934800573 38.8495095797881  
 OR2M7 37.9387791625384 35.2143190355414 37.6557714476853 39.6292788039793  
 35.3327761997046 40.244271403831 34.5633623842083 39.9576138799997  
 35.4332080966594 37.3179578037963 33.6080693875435 38.4330755397458  
 OR2S2 38.8561375693335 42.2577689927563 37.1643693306382 39.1706564265495  
 35.9894133432376 38.7340969861754 35.0305278582179 42.5435283762933  
 43.6670755115848 41.0057887014368 38.8507804383261 38.8495095797881  
 OR2T1 36.9060997041453 36.2103905554984 31.1853651446075 36.3604951341921  
 44.0451487108213 37.4782441311626 41.253645578517 33.6816578730693  
 40.2274522635576 35.93950183586 37.2892641289258 38.3291713594599  
 OR2T10 37.7384958256497 35.8227939208521 36.5474283500601  
 39.066284740632 37.7576900881741 37.0180934800573 37.3799542961839  
 40.5158867964016 41.4636047919453 38.8507804383261 39.4410515050885  
 38.0452862258803  
 OR2T11 44.436995101921 36.3110701990588 48.0191002461099  
 38.8495095797881 48.0234896130991 40.244271403831 42.1607322031054  
 44.8997235283254 46.7760357462635 41.8613406887824 42.170702295259  
 46.917149434588  
 OR2T12 42.1679276329916 44.7829632472754 46.7058093820839  
 41.5464765641928 42.3536549114165 44.7044140979108 44.7255207589606  
 41.8417024632349 39.7162631015511 42.02667925031 43.2551508830106  
 41.5132248356707  
 OR2T2 45.7700386532539 43.7644428186265 45.0115870036541 45.8844325913247  
 44.0451487108213 44.6524308640784 46.3611042575528 43.7731874801003  
 46.824299585607 42.8936990772838 42.2618615571566 43.0322714179517  
 OR2T27 38.5007204246293 30.3554137634399 36.3604951341921  
 41.3027031037343 38.1644569189523 37.8102105794655 33.4316681623175

39.4710743516517 36.8127605061228 32.406093465115 33.5370783156523  
46.4499258373233  
OR2T29 37.9387791625384 44.3529919625344 41.0356368374708  
44.9370339275041 40.8873907150245 38.9378717994178 35.7055410599146  
39.6474008369935 40.3316153483289 37.4302011516587 39.9899430628542  
41.6550823405646  
OR2T3 36.8072833828297 39.7835513496873 39.4710743516517 41.7614975630362  
39.4693871570028 43.7630587657205 33.9750800030909 36.8400213077707  
33.6288663955758 38.6454098044474 37.8372168909583 39.0536056496869  
OR2T33 44.7915315085948 36.5219488315447 40.8420925848403  
42.6913548400127 41.6806984441849 46.1513019317765 41.4742337714895  
41.2551966132486 41.7627910693483 45.4614234442527 43.0971787292711  
42.8864415494484  
OR2T34 38.957687788868 38.8336427948187 47.3861758958576  
39.1706564265495 37.956732373465 31.9222834447339 34.6720534245631  
37.2237132058632 38.4344387289956 32.0298369224145 40.3452320167286  
35.7451401627836  
OR2T35 41.8409927585705 42.6022652963326 39.3303857231606  
40.9085497163517 44.6834648302383 43.2805590023412 42.1157692936428  
41.0844534776541 42.4784375889044 42.7275315121163 37.33030683349  
40.1700117452801  
OR2T4 38.1169703906207 37.8217989841918 39.1799070031819 36.0481934423077  
34.806104801006 43.5752393599169 31.6981395162348 34.1806289878747  
39.1790517315259 38.0078357808393 35.046946054314 46.3411353377615  
OR2T5 35.4287975493553 36.9994058279362 41.8751578329365 45.1944222548351  
35.7973685350741 52.4351670989268 43.1931731665131 34.064698871541  
51.2066664465185 38.6454098044474 36.7283081422707 46.2625470410195  
OR2T6 43.5710871617107 40.4359177791566 53.1491634301682 43.9282059368202  
44.6834648302383 46.263826584899 43.9450023643394 43.0390857698452  
43.5669306063196 34.7308008643142 39.8184668132023 42.4607795638552  
OR2T8 40.6559419616644 39.3999056968598 34.5718473203083 35.9521941716188  
33.6330903323612 35.9305494063137 34.0777108441756 35.5798430594271  
39.853866204927 36.8059561571675 38.3684202018524 39.9519547348106  
OR2V2 37.8386378737561 40.3384318592985 41.2365089689635 41.0726336841311  
47.5647821785529 41.159706131351 48.9826868640753 38.745552403895  
46.7760357462635 39.2623423164488 44.3763859390287 44.0451487108213  
OR2W1 34.5886782974123 36.6968906669565 33.9435456570176 33.0463640202858  
31.9468644542969 33.4492509999281 28.6786952763294 34.4896350146096  
33.5578650644246 34.064698871541 32.406093465115 33.0217499673686  
OR2W3 46.7293238583888 39.8695929627783 45.8844325913247 47.9915414951747  
42.9090346219023 43.7630587657205 46.5650556481721 41.1575777497576  
40.6957787921451 38.957687788868 48.3847843498476 39.3575468494941  
OR2W5 49.085741080241 45.3486182278177 51.6159542017038 48.9944486068347  
48.6224651100733 44.2607789091176 46.3057385979341 47.0940613507321  
50.6750785584772 51.7594352155304 51.7538628098347 49.8253396161069  
OR2Y1 39.266565827316 39.7835513496873 45.063792968927 36.9912468186322  
41.5668884168669 37.2686490268265 38.0598374201407 43.4544762830742  
37.9273653326866 35.2880714952489 34.7308008643142 43.3744503319109  
OR2Z1 41.9407041937973 39.6995529770239 42.0621425894624 35.3829784221072  
44.4489662507893 41.159706131351 43.3262148375525 41.3506832276112  
40.6957787921451 39.4710743516517 43.3085358214154 44.2527566343661  
OR3A1 38.385865183581 42.3550738181144 35.7105247506212 41.3027031037343  
38.4540849632254 41.0582900711341 40.4359177791566 39.4710743516517  
42.992884918158 43.7303813515864 46.2560238004757 50.2163892855092

OR3A2 42.442231667357 44.0409178714232 42.157627240486 38.8495095797881  
35.9894133432376 41.8613406887824 43.3262148375525 41.2551966132486  
37.4540772310118 41.5435611403119 46.824299585607 46.2625470410195  
OR3A3 42.2455707947223 41.8848959280916 39.0775870687758 47.0874209746031  
40.148780650831 34.2773859804062 46.5650556481721 39.853866204927  
48.4869909888679 39.6719190054379 40.9157352260901 37.9607839934735  
OR3A4 61.2130609867477 74.9956591643367 74.2122914028677 62.8201270538435  
63.25187762908 51.1621379498014 67.0455170947389 49.3880946790306  
67.3230935444252 79.4916415027015 67.9599395822006 84.2728210732532  
OR4A15 37.8386378737561 33.3069622728735 41.3366779545815  
40.0698728584484 46.1804647841331 42.157627240486 39.0458123429605  
37.7612949798895 41.2870505273664 36.4651112441576 40.4504608195666  
38.3291713594599  
OR4A16 40.0557788909923 40.716553247236 41.785676764591  
42.0102671859606 36.6354013629791 39.6251842352088 41.253645578517  
35.0510338774593 45.2897806651929 42.1622837416589 40.6373400186325  
40.4639532172338  
OR4A47 34.9138625012006 45.3486182278177 32.3881195727383  
36.9912468186322 39.5595233162192 36.3845892764084 38.8417151851134  
38.745552403895 44.4395580493118 41.4397539024976 39.0550139257658  
32.2133093774284  
OR4A5 38.2083710281545 39.6123051184545 36.8730514568925 38.5252456306656  
43.844855336215 41.7627910693483 36.5352572191451 38.3684202018524  
41.3803269429468 33.4316681623175 39.2542963855807 42.57175366709  
OR4B1 41.8409927585705 39.1553169409075 42.6920011548175 41.8778873678551  
40.9950639693255 40.5281496800812 44.2166118829877 43.6434576713809  
42.9020321355927 43.1839109702714 40.547835538778 41.0226232127351  
OR4C11 38.0089018744739 45.2556760873335 39.8299340037009  
40.4359177791566 40.148780650831 44.6524308640784 42.7431359850339  
41.3506832276112 38.5252456306656 41.8613406887824 38.5668610487033  
38.4330755397458  
OR4C12 41.4508241771315 41.3277288245157 41.1367478979484  
43.4410741327254 39.4693871570028 36.9625898230551 42.357910063876  
37.86982638952 35.3227485563945 40.3235655331796 38.5252456306656  
41.3803269429468  
OR4C13 38.7537364570873 40.716553247236 34.806104801006  
43.6726153508978 38.4540849632254 38.9378717994178 41.3594868055879  
40.831207953647 41.863927676552 42.5664883002833 45.0589947942306  
36.449101775775  
OR4C15 44.0707087774725 43.7644428186265 38.6005272730664  
41.6564075217517 41.3387790895716 40.8970401536578 43.2721716572958  
41.8767957887205 40.7460990419215 46.8292269513767 41.0476065156912  
41.4508241771315  
OR4C16 34.9138625012006 35.6434124419782 36.6522278218553  
37.0732977341185 35.2163900400329 38.9378717994178 40.6750540874299  
32.0636251428594 40.4997186069494 36.0481934423077 43.0971787292711  
38.6454098044474  
OR4C3 40.0988483617359 41.7614975630362 41.6977706798234 44.6131679221578  
42.4864576619427 39.132725377815 42.8684958525042 46.1159021593282  
43.3744503319109 46.1736875058473 42.3413611855132 40.4639532172338  
OR4C45 51.7607563002005 43.0971787292711 46.8267540220952  
44.9370339275041 46.0043807840705 43.7630587657205 42.0605906240248  
47.7889447429963 43.9450023643394 49.4006068471301 45.310660704531  
46.4499258373233

OR4C46 40.9558083259517 40.6380495994768 41.6977706798234  
39.7411455670172 39.2608760193011 41.7627910693483 45.6042625176633  
38.1835938174625 45.0017158586743 42.3606390470387 45.5707650534259  
42.7782216342806  
OR4C6 38.7537364570873 43.5182502375207 41.0356368374708 39.9697332660833  
49.32293280121 41.554942319225 43.9450023643394 36.0306975524309  
42.9020321355927 40.7063426028871 40.547835538778 41.9430737035925  
OR4D1 36.5393857306744 40.3384318592985 43.1931731665131 39.853175885492  
44.147557390293 41.554942319225 38.7337086062875 34.4896350146096  
37.1820543575123 46.2286164776607 40.723990462047 48.7814131120945  
OR4D10 46.6348258763289 44.5152708955623 43.0971787292711  
42.0102671859606 46.9058511192313 43.0860383229288 38.7337086062875  
43.3838505886856 40.4997186069494 42.4594149893798 41.9908237694988  
40.9149601380325  
OR4D11 40.8681871019812 36.3110701990588 41.6977706798234  
38.2041059863839 42.0709558258414 41.4508241771315 38.6243997507646  
37.5511560880902 42.1594905198929 40.6022003765153 40.547835538778  
35.4484652445078  
OR4D2 43.0930293831497 45.2556760873335 42.8723769353017 45.5869891570251  
40.0145811166794 39.6609238036815 39.2533668167483 40.5640952422779  
42.3138951003676 42.4393920571519 40.040778349137 37.4059035942248  
OR4D5 40.4639532172338 40.4359177791566 43.1931731665131 46.8954576545929  
37.5556299264699 41.9543948167375 39.8695929627783 39.4710743516517  
42.357910063876 43.2988017098387 39.9070785037411 41.4508241771315  
OR4D6 53.3967242431461 43.5873188565519 40.4882741869718 43.8002456102021  
43.2484996523549 40.650742261428 37.1643693306382 45.8669209716694  
43.1805016690297 46.8954576545929 42.0750889188255 39.3575468494941  
OR4D9 43.0930293831497 44.2630383225933 38.7745734037492 40.0698728584484  
38.3561682218911 39.7394181011603 38.5066108855005 40.3357777530419  
37.6383530120621 35.3849221682845 43.5710871617107 39.4490233720848  
OR4E2 34.0467249875782 32.6416008433981 39.1799070031819 45.7397504535169  
38.4540849632254 38.9378717994178 40.4359177791566 39.2672712041774  
38.7298222155532 33.5412189543102 40.0766543123257 33.3192849177028  
OR4F15 43.1805016690297 42.9358255168086 41.8751578329365  
36.6501141438378 41.1868052124344 31.9222834447339 41.4742337714895  
39.7509165247419 37.9273653326866 40.1179210534118 45.5707650534259  
37.9607839934735  
OR4F16 36.9060997041453 39.6995529770239 37.0642268327439  
42.357910063876 39.7568367479301 35.6125439901743 41.5817737564592  
34.064698871541 42.1594905198929 41.9666541498638 36.9060997041453  
42.0424641526302  
OR4F21 40.8091178323174 45.9266745571724 40.8420925848403  
38.4540849632254 39.5595233162192 36.8527889114786 41.253645578517  
38.2782436497441 39.2809305246091 37.5343260962758 39.7576136507593  
37.3057614736707  
OR4F3 38.0089018744739 37.6383530120621 38.4043916290561 41.7614975630362  
39.6535880152834 42.2577689927563 36.5352572191451 40.5158867964016  
38.9834959368496 37.6383530120621 37.2018803984555 40.4639532172338  
OR4F4 40.5235471987417 36.89524015739 42.157627240486 40.1362682639916  
43.004943518025 41.1090481599939 41.4369824439795 36.7016645007743  
39.5806465938526 39.6719190054379 40.2649309204478 43.9541718254769  
OR4F5 41.6354649482853 42.6939394537076 38.7745734037492 41.0219290963778  
44.5092684716474 42.808889470973 42.9803717121865 41.2884376047238  
44.4395580493118 38.0078357808393 43.9450023643394 42.828737648529

OR4F6 37.1485601150873 40.6380495994768 39.0775870687758 45.1944222548351  
41.5668884168669 36.8059561571675 45.3597029614942 38.2782436497441  
40.5912213523345 38.4187686307607 38.1835938174625 41.0657892043496  
OR4K1 55.7246872330059 41.0678614026819 37.4642807402741 39.3750969348308  
41.0885562160946 41.554942319225 40.1235656101329 42.0494116081998  
41.9635525160083 49.0841460667818 37.7384958256497 38.6454098044474  
OR4K13 41.2424637338424 44.8529259387308 41.3366779545815  
38.745552403895 43.6587492470348 44.7804080899431 43.4544762830742  
41.2551966132486 39.5806465938526 37.8217989841918 39.3667161654772  
46.7182294568603  
OR4K14 42.8036731479932 35.6434124419782 41.0356368374708  
39.1706564265495 40.3452320167286 39.132725377815 61.8571521441451  
43.1567024035183 39.853866204927 41.8613406887824 41.7272875295469  
41.7575097298927  
OR4K15 44.2718517563299 39.7835513496873 43.7085219318425  
39.9084621723809 41.4397539024976 41.809704036355 40.369768755239  
42.157627240486 40.8420925848403 39.6251842352088 38.6662194645633  
42.0424641526302  
OR4K17 41.1523487516364 42.7775752471711 38.4456289125816  
41.2445895434274 39.2114264935239 42.2577689927563 42.9803717121865  
39.5083491499018 42.992884918158 40.6533975461148 41.9083581529276  
46.1592873342534  
OR4K2 44.5282181324797 42.2900457798748 42.6920011548175 44.265834798964  
39.1087466732192 43.4681646416585 40.968974769473 38.7864161493321  
39.5411918095433 40.4136535208406 41.4860822396574 39.9941474864076  
OR4K5 47.5647821785529 36.1232327599945 44.4311655729487 42.0102671859606  
41.8806343997257 35.314469458379 42.4939802311136 41.3506832276112  
40.6957787921451 39.7835513496873 41.1638563416981 38.4330755397458  
OR4L1 39.0237504776589 40.3104838541906 43.1660110696573 44.4912617551615  
43.6587492470348 39.266565827316 42.1607322031054 38.6454098044474  
41.4636047919453 41.0057887014368 39.2542963855807 39.7411455670172  
OR4M1 40.5235471987417 41.554942319225 41.437237454134 41.8291484190524  
37.4937394063612 47.4699236780425 40.7376840028647 40.5640952422779  
41.5296458719756 40.2615278292875 37.4642807402741 39.4830039788612  
OR4M2 45.7356815244513 38.6704566269103 38.941855825269 40.591923288644  
37.2567512265363 39.6251842352088 38.2280071951674 40.2382908228517  
38.7298222155532 39.7411455670172 38.5252456306656 37.6557714476853  
OR4N2 45.4799270968969 43.0227387991135 36.8730514568925 40.646702696033  
41.0885562160946 39.8455060654531 36.8369172900902 41.4508241771315  
36.4476883897928 36.1550293353654 39.0550139257658 40.5703581862752  
OR4N4 38.6454098044474 35.6434124419782 39.8299340037009 42.357910063876  
41.1868052124344 41.9543948167375 40.0052661202207 43.5544347011646  
40.6957787921451 37.8217989841918 39.0550139257658 39.1553169409075  
OR4N5 38.8561375693335 42.6022652963326 40.0998167098057 40.646702696033  
44.7829632472754 41.4508241771315 39.0458123429605 44.9977782988116  
39.3750969348308 42.1622837416589 38.3684202018524 40.6614700944853  
OR4P4 44.436995101921 39.2907645923217 44.1452943804044 42.6913548400127  
50.2163892855092 43.7630587657205 44.2166118829877 42.5435283762933  
39.3750969348308 38.957687788868 41.6336636285875 44.2527566343661  
OR4Q3 39.4250105372135 42.9358255168086 39.6451483836089 38.4699622716254  
33.8111782249716 34.9303524605169 38.5474297403025 43.0930293831497  
42.0621425894624 39.8455060654531 39.9586075662602 36.5474283500601

OR4S1 41.0608773166058 40.5400384479766 35.5220586859301 40.4359177791566  
39.7568367479301 43.8582747295766 42.1607322031054 40.2382908228517  
43.5669306063196 45.4614234442527 42.357910063876 39.0536056496869  
OR4S2 42.2455707947223 40.148780650831 43.3085358214154 34.8137085420423  
36.3390947880186 44.6524308640784 32.1218888714537 34.5886782974123  
42.0621425894624 39.9948390976317 35.7953070087288 35.5523662009011  
OR4X1 41.7397731376692 39.5050383901884 40.4882741869718 46.8954576545929  
39.0564222526273 45.3882138838137 41.0381860307445 46.2779564481158  
41.074824727477 39.5637454855233 36.131485826118 41.1554481567603  
OR4X2 39.1590964332473 35.7393138893354 44.8872784170036 29.633229264005  
39.6535880152834 36.8059561571675 33.2425023465738 39.5466975353131  
32.1218888714537 43.4885245598939 39.153226699662 33.4316681623175  
OR51A2 41.7397731376692 43.1805016690297 38.9790184198145  
45.4634652319753 41.2740822675592 36.3845892764084 37.7136011474903  
43.3262148375525 40.3316153483289 40.7063426028871 39.7342718293432  
41.1554481567603  
OR51A4 32.742439449766 37.6383530120621 37.4642807402741  
44.0451487108213 41.1868052124344 37.9951997351435 41.1507980856436  
37.0390589468421 36.2733735494625 37.5343260962758 38.956280281655  
37.5556299264699  
OR51A7 39.7576136507593 43.4396866157171 45.5883690965192  
43.1847628331565 41.7929491793697 39.9397419279057 41.9393838138203  
42.2577689927563 46.8873421271259 45.1569741609597 41.3553369544097  
43.6753843488695  
OR51B2 39.7576136507593 50.3586212130973 37.2838080935695  
49.7350276169552 37.956732373465 43.1826328292558 39.0458123429605  
42.8482181313226 38.3418933808844 39.3698811593364 37.2892641289258  
42.1537476443423  
OR51B4 36.9060997041453 39.2907645923217 42.157627240486  
42.8235313007746 47.2074332636566 38.3418933808844 43.1931731665131  
46.0633179231318 45.9227107476843 40.3235655331796 43.6629145624937  
42.2577689927563  
OR51B5 36.4564050256915 41.9894412416874 43.0016969050339  
41.4727452533295 42.4493032770053 37.7427315853995 41.8799523546812  
39.3709357615493 41.8197029429821 38.0078357808393 35.5179217192467  
36.6603338274678  
OR51B6 34.9138625012006 39.5050383901884 36.1042012504758  
37.7469621225553 36.9060997041453 39.3841861812262 39.8695929627783  
37.33030683349 37.9273653326866 38.2069499294002 37.9230440150891  
40.3691324547049  
OR51D1 47.0940613507321 45.9266745571724 47.2962360458401  
59.0965219753805 45.8051846088552 40.244271403831 47.1345949868029  
42.6450179841129 40.2274522635576 42.2614524730856 47.9942520395434  
38.8495095797881  
OR51E1 47.9175508887533 49.83247261979 46.6588655218735  
43.8002456102021 40.4639532172338 37.7000400506818 40.3302268293707  
36.0306975524309 38.2215591930186 37.1275334308172 38.5668610487033  
40.3691324547049  
OR51E2 49.9419897484381 51.1740855632044 49.8344973836834  
58.3475983630509 48.2748123114598 50.9724155054821 66.8475050031365  
41.5464765641928 43.5669306063196 50.7855742231932 46.824299585607  
56.8534370691413  
OR51F1 43.632365631458 43.4667754607514 39.8299340037009  
42.6222445667107 39.859345745831 39.5472604976664 42.4939802311136



39.0620487644635 36.7267557061938 40.4136535208406 37.8372168909583  
38.195965820384  
OR51F2 41.2773842727759 38.8336427948187 39.4710743516517  
39.2780515621926 42.7489468897708 37.9430145836712 39.7162631015511  
39.4322247076926 36.3352882516399 36.301880813824 39.3086414047188  
40.9149601380325  
OR51G1 36.9060997041453 41.2598458726002 39.7411455670172  
37.8442841690502 41.3755760434934 35.6125439901743 47.2927436772465  
41.3506832276112 42.6366765186182 36.9102644736882 37.2018803984555  
47.3992733452821  
OR51G2 41.1523487516364 38.3322849790657 39.6451483836089  
39.3750969348308 50.2163892855092 37.3799542961839 41.1507980856436  
37.5511560880902 40.7847110517594 32.406093465115 36.7283081422707  
37.6557714476853  
OR51I1 39.3709357615493 40.0527893189096 45.989212296035  
45.8844325913247 44.7829632472754 46.8954576545929 47.1345949868029  
43.5544347011646 40.2274522635576 44.1379638573455 38.1835938174625  
38.9496515344837  
OR51I2 37.55264801907 38.9338521051669 38.6005272730664  
38.9534635879195 39.9697332660833 37.9951997351435 48.3411413510851  
38.6454098044474 41.3803269429468 38.745552403895 38.3684202018524  
37.1747156131306  
OR51L1 38.0089018744739 35.0222940937513 37.5597671487621  
44.0451487108213 40.3452320167286 37.2686490268265 39.4600924554505  
41.5464765641928 44.7058233759912 40.3235655331796 39.8184668132023  
40.0557788909923  
OR51M1 48.4849194706125 41.4508241771315 43.0971787292711  
38.8495095797881 45.9104478407175 41.7627910693483 45.1017494688414  
40.4359177791566 42.8036731479932 40.8970401536578 37.8372168909583  
37.7526485343328  
OR51Q1 34.1336988442837 39.1982470626863 40.8420925848403  
44.4367387274922 43.7517118200398 37.2686490268265 41.706879587091  
39.3709357615493 43.3744503319109 49.1928206164702 39.9070785037411  
38.2350720635382  
OR51S1 42.8036731479932 37.3634897565502 39.2707964550441  
40.5484717678957 42.7107928951766 40.5281496800812 35.4623691645629  
34.806104801006 40.0403898620771 38.4187686307607 36.43924066428  
43.5738557773903  
OR51T1 45.7356815244513 47.6914221838216 52.0742951366864  
41.5464765641928 41.8806343997257 42.2577689927563 39.2533668167483  
40.6171774724171 53.9287524861617 45.0155543555707 47.4630625313159  
44.4475838947656  
OR51V1 32.9174234020987 35.2143190355414 36.769073068743  
30.6485078361448 36.3390947880186 40.040778349137 31.4474799869345  
38.3684202018524 34.4716904283753 36.6893251782922 32.5482839399637  
34.3409660445447  
OR52A1 42.2455707947223 40.0527893189096 38.3166554965434  
39.9697332660833 43.3332476888305 40.8634043028528 41.8315602975157  
39.1652965788406 42.2577689927563 37.920964499903 38.1835938174625  
39.4490233720848  
OR52A4 40.0557788909923 40.8880530359822 35.3649449469275  
39.1706564265495 40.3452320167286 42.2577689927563 45.223075311113  
37.1317006162938 42.8036731479932 41.0057887014368 36.2435874904689  
33.939263369489

OR52A5 48.6157847333895 49.6203214143464 51.462029007278  
41.4273122914951 54.6820069269589 48.7070804960074 50.6069579386898  
45.9104478407175 57.6336931026499 51.7983110178095 50.5012374236055  
46.5905131500956

OR52B2 35.7012997405508 41.4508241771315 40.931294690669  
40.3180310664156 39.5595233162192 34.7983399096627 45.3597029614942  
39.7509165247419 39.9444191873552 42.2614524730856 44.6286581923295  
40.8681871019812

OR52B4 35.0202257459026 38.0226905622357 36.3604951341921  
41.5464765641928 36.6354013629791 37.7000400506818 36.197424053556  
39.2672712041774 35.3227485563945 41.6373771565199 37.5583886316038  
42.357910063876

OR52B6 43.5710871617107 46.7591817286632 43.4709415392696  
44.6905691366696 47.0954207417646 44.8872784170036 44.9863726205428  
41.4508241771315 48.3954967265007 38.2069499294002 47.7535797917441  
40.2669497398702

OR52D1 38.5007204246293 38.2263227947189 41.8751578329365  
37.651298468202 45.6895223823001 43.1826328292558 38.5066108855005  
42.0494116081998 40.8970401536578 48.0211752672327 37.7384958256497  
35.8429598823818

OR52E2 36.3649677956953 36.5219488315447 36.6522278218553  
37.4223289687135 39.4693871570028 38.8336427948187 40.1235656101329  
38.956280281655 44.619512785899 39.9948390976317 37.2018803984555  
37.9607839934735

OR52E4 41.4508241771315 35.3307157989724 40.6737160001291  
41.4273122914951 41.3755760434934 45.7300501624017 52.4111687156893  
40.5158867964016 36.4476883897928 42.0621425894624 38.3684202018524  
37.3600014814388

OR52E5 41.3387790895716 41.7337506166619 43.5710871617107  
41.1886975241176 44.3557408297309 43.0860383229288 40.5585676679482  
47.4740726032707 41.1742244762318 50.6486940895674 45.8180710486329  
40.8681871019812

OR52E6 41.2424637338424 43.0227387991135 41.1367478979484  
39.066284740632 43.844855336215 45.1873487463472 41.3594868055879  
42.357910063876 41.5635499110307 39.7835513496873 46.7386599624801  
40.2669497398702

OR52E8 37.2474303302343 46.9919960628953 36.8730514568925  
41.3027031037343 44.8897737954573 36.0306975524309 36.3194282084339  
35.5798430594271 35.9645119596869 38.528621456378 35.046946054314  
37.2810767789306

OR52H1 46.0920218698606 41.8073910693411 41.1367478979484  
44.4367387274922 41.9842695818285 45.7300501624017 42.9803717121865  
43.1567024035183 43.9450023643394 37.920964499903 43.5710871617107  
43.7672102682067

OR52I1 39.9697332660833 42.5269793679335 41.0356368374708  
47.3574589211166 42.269054475455 37.5887129572848 39.3585350448719  
43.3262148375525 46.0106098064475 40.8049408996274 42.170702295259  
42.357910063876

OR52I2 36.1232327599945 39.2907645923217 37.4642807402741  
40.5484717678957 35.5220586859301 40.244271403831 38.2933870238743  
36.1375121409002 36.9060997041453 36.4651112441576 43.844855336215  
36.449101775775

OR52J3 41.3387790895716 45.8669209716694 39.991353369336  
45.5869891570251 43.2484996523549 38.1169703906207 35.8227939208521

35.9023742468744 40.6957787921451 41.2276963324981 40.9157352260901  
40.8681871019812  
OR52K1 47.8249696958403 41.8848959280916 43.9450023643394  
46.1673159982664 44.2607789091176 48.7781962164988 38.941855825269  
45.642304356051 45.8325181856483 43.0919221375514 43.844855336215  
44.0451487108213  
OR52K2 44.1294459089314 43.683792219729 40.4882741869718  
39.7411455670172 44.7829632472754 40.1428591998404 41.0381860307445  
40.7311497914871 43.6670755115848 42.4594149893798 37.4642807402741  
37.5556299264699  
OR52L1 41.4508241771315 40.2493681589104 35.4484652445078  
44.7980740332174 47.6884372645373 43.0860383229288 39.5496902678788  
42.0494116081998 42.357910063876 44.8997235283254 42.911855821602  
39.1553169409075  
OR52M1 39.0620487644635 41.159706131351 39.7411455670172  
41.1886975241176 39.0564222526273 34.0777108441756 40.2154497375715  
38.745552403895 35.4332080966594 39.2623423164488 39.9899430628542  
42.0424641526302  
OR52N1 40.7609952437622 41.0678614026819 39.3709357615493  
32.554751989205 44.5668141895992 39.9397419279057 39.1539892144371  
39.2672712041774 41.6616444147804 45.0155543555707 40.8225507267584  
41.4508241771315  
OR52N2 57.6285775590145 44.4411734611229 53.4743535852344  
45.4634652319753 44.147557390293 44.9896851005259 45.6042625176633  
44.1311654985682 48.5792058061372 49.8393069675192 42.170702295259  
39.3575468494941  
OR52N4 42.6036491382658 41.8073910693411 38.8775560911841  
42.6913548400127 41.1868052124344 39.4953494583071 39.0458123429605  
44.6107027295193 33.9456837661864 36.5806287103157 37.6484782516569  
41.6550823405646  
OR52N5 41.2424637338424 46.6314009405034 41.528370959196  
48.1662933382789 39.5595233162192 42.2577689927563 40.9157352260901  
36.1375121409002 46.6944238390932 43.2988017098387 42.0750889188255  
43.0930293831497  
OR52R1 39.6609238036815 42.2577689927563 39.5450079747895  
35.8472302065546 43.844855336215 40.3357777530419 45.4799270968969  
42.157627240486 43.2761454096265 40.3235655331796 42.6366765186182  
40.1700117452801  
OR52W1 37.8386378737561 32.9795880920156 37.4642807402741  
51.0175677516029 43.2484996523549 40.8634043028528 45.7452456977857  
38.6454098044474 41.7627910693483 43.0919221375514 43.5710871617107  
41.6550823405646  
OR56A1 45.2875173643252 41.9894412416874 49.8344973836834  
50.0526763693329 42.6022652963326 41.2567470068038 44.0687697278114  
43.0390857698452 41.4636047919453 43.4885245598939 37.4642807402741  
41.6550823405646  
OR56A3 40.8681871019812 36.7976562409506 36.5474283500601  
40.4359177791566 36.5393857306744 38.5252456306656 38.7337086062875  
41.0381860307445 39.6609238036815 38.2069499294002 40.9157352260901  
35.9604262434141  
OR56A4 39.1590964332473 36.3110701990588 42.3536549114165  
39.7411455670172 38.5512429290626 36.8059561571675 35.9058393060637  
37.4484310268909 38.4344387289956 39.9948390976317 35.7953070087288  
36.9976231206067

OR56B1 40.6559419616644 35.2143190355414 37.2838080935695  
41.8778873678551 37.6527901109005 38.7340969861754 36.8369172900902  
38.5457716679071 37.7384958256497 41.7405682794166 36.2435874904689  
41.2437378488025

OR56B4 43.0001432913058 46.0023068797812 42.4580504587581  
60.3481762331447 45.2556760873335 47.8636003588181 46.1634822993009  
46.9986083378817 50.1603795873336 41.1222709786153 46.5650556481721  
41.2437378488025

OR5A1 37.1485601150873 34.3715326040967 34.8956628705329 37.5382094267692  
36.6354013629791 41.2567470068038 34.806104801006 37.2237132058632  
40.2274522635576 34.5718473203083 37.6484782516569 35.3525469364579

OR5A2 40.148780650831 36.7976562409506 33.9435456570176 36.0481934423077  
38.5512429290626 34.8956628705329 39.5496902678788 33.1477313087177  
41.863927676552 39.1621898366355 35.6041926503637 34.1509644696334

OR5AC2 36.6480005877129 34.0382693188794 39.1799070031819  
44.4367387274922 43.844855336215 32.9046688061235 37.830876898596  
45.7476095696859 42.7150227340364 37.3179578037963 40.6373400186325  
44.4475838947656

OR5AK2 42.2455707947223 37.10170285405 38.5045333213784  
36.3604951341921 37.7576900881741 34.9849896310235 37.2892641289258  
39.0620487644635 38.9006788676407 35.8304004211528 36.131485826118  
35.8429598823818

OR5AN1 43.5710871617107 42.4493032770053 41.8751578329365  
42.2496337895968 40.148780650831 39.4953494583071 42.8684958525042  
46.4672637826582 41.3803269429468 43.1839109702714 43.1931731665131  
40.4639532172338

OR5AP2 39.0620487644635 37.2810767789306 39.6451483836089  
47.481302504066 39.6535880152834 37.5887129572848 38.4005795891396  
39.9576138799997 44.0519245668737 37.1275334308172 43.7585538437696  
40.5703581862752

OR5AR1 35.4287975493553 42.0500582486532 41.6550823405646  
42.0621425894624 45.7452456977857 41.4508241771315 40.7376840028647  
41.7877325563821 40.0870341983328 40.6022003765153 42.1537476443423  
41.863927676552

OR5AS1 41.8409927585705 41.4508241771315 38.6727842796202  
57.4595416719581 42.4864576619427 39.3841861812262 39.6535880152834  
41.4508241771315 40.9901805728485 50.22432299342 45.390192977585  
38.9496515344837

OR5AU1 45.0985088502363 43.0971787292711 46.1653991089885  
35.6027791404152 41.9842695818285 39.6251842352088 40.2154497375715  
39.3709357615493 42.8036731479932 41.5435611403119 42.170702295259  
44.6484005362281

OR5AY1 37.0320432433314 36.7976562409506 34.1806289878747  
42.5664883002833 44.6834648302383 39.2248354955045 45.7452456977857  
38.2782436497441 39.9444191873552 45.9004543328976 42.0750889188255  
40.3691324547049

OR5B12 38.5007204246293 39.6123051184545 40.5734458834617  
42.357910063876 40.0599807618105 43.5752393599169 38.0598374201407  
41.1575777497576 44.0519245668737 41.4397539024976 33.1645364749371  
42.0424641526302

OR5B17 39.266565827316 38.0226905622357 33.553634633839  
44.7980740332174 36.9060997041453 33.3470732872681 44.0687697278114  
42.8482181313226 36.0741672064298 32.406093465115 38.745552403895  
37.9607839934735

OR5B2 37.2474303302343 41.8073910693411 42.3536549114165 39.853175885492  
45.2556760873335 39.132725377815 37.830876898596 45.5581356216957  
38.9834959368496 39.7835513496873 45.0589947942306 44.7401523707775  
OR5B21 42.5193208629123 40.148780650831 44.0451487108213  
53.0284011078097 43.2484996523549 44.7804080899431 47.5963750520409  
42.7431359850339 45.5779686360641 41.4397539024976 39.3667161654772  
49.5539622682049  
OR5B3 40.4639532172338 38.8336427948187 46.2625470410195 39.9697332660833  
47.3172462673426 46.1513019317765 39.5496902678788 37.6557714476853  
40.0403898620771 36.2435874904689 36.8282383070068 37.1747156131306  
OR5C1 41.3387790895716 42.4493032770053 40.0998167098057 47.481302504066  
45.1137938810047 45.4882438975269 40.7910160811527 39.6474008369935  
39.0775870687758 42.9866214102525 42.7275315121163 37.6557714476853  
OR5D13 35.5179217192467 37.10170285405 42.157627240486  
36.7892997857376 41.8806343997257 42.4580504587581 42.0605906240248  
40.1474543172332 41.074824727477 40.3235655331796 37.9946685306274  
43.7672102682067  
OR5D14 38.6454098044474 38.8336427948187 37.8386378737561  
40.7481155008596 43.7517118200398 42.750861693377 46.7100796279384  
44.797320243931 39.9444191873552 42.1622837416589 37.6484782516569  
45.7562276914441  
OR5D16 48.1125722136997 42.1607322031054 40.7222199182322  
42.1273928203021 43.004943518025 44.2607789091176 46.6267962186599  
42.3887531663733 40.1738310955128 43.5627649099623 41.2267153672559  
43.9541718254769  
OR5D18 40.5654775358427 35.7012997405508 36.7172300749476  
43.4410741327254 44.0451487108213 39.0266821712099 37.7136011474903  
37.8259545414544 39.4433784795209 36.2435874904689 37.8372168909583  
39.4490233720848  
OR5F1 39.7320564340365 41.159706131351 42.1901757067073 37.8442841690502  
46.0977687311222 40.8970401536578 42.0605906240248 40.7799172560245  
42.4784375889044 42.785429206422 42.2618615571566 39.9519547348106  
OR5H1 40.7609952437622 31.1853651446075 44.0451487108213 42.2496337895968  
41.5668884168669 39.4953494583071 39.4600924554505 39.4710743516517  
45.8325181856483 39.6719190054379 39.8184668132023 47.5025821041537  
OR5H14 37.9387791625384 39.7835513496873 46.5650556481721  
32.554751989205 39.2608760193011 40.5281496800812 36.3194282084339  
40.5158867964016 32.039934894666 43.6033221838149 36.8282383070068  
38.1421709520616  
OR5H15 37.3463875295726 34.9262464079777 32.9174234020987  
39.3750969348308 38.6454098044474 39.6251842352088 38.1793598983615  
41.4508241771315 40.5912213523345 40.3235655331796 37.2892641289258  
33.4316681623175  
OR5H2 41.5421429082231 29.745266251498 37.3687900733549 40.7481155008596  
36.9060997041453 34.7983399096627 39.8695929627783 37.4484310268909  
39.5806465938526 36.8059561571675 43.0971787292711 35.9604262434141  
OR5H6 40.0557788909923 39.5050383901884 41.528370959196 37.1894304543751  
45.2556760873335 38.4330755397458 41.0381860307445 42.0494116081998  
42.9020321355927 43.844855336215 38.6662194645633 35.2448979801094  
OR5I1 38.957687788868 40.0527893189096 41.528370959196 41.4273122914951  
39.1650142708257 41.4508241771315 42.8684958525042 43.4544762830742  
41.3803269429468 38.1042454705119 39.9070785037411 41.863927676552

OR5J2 34.8099089553046 37.920964499903 36.178547300352 39.3750969348308  
38.745552403895 37.1317006162938 37.2892641289258 37.86982638952  
36.197424053556 35.195364621675 34.5633623842083 38.8495095797881  
OR5K1 41.9407041937973 45.4882438975269 41.3366779545815 42.5664883002833  
40.4639532172338 40.1428591998404 43.3262148375525 44.5029690493211  
46.0106098064475 48.0211752672327 39.153226699662 41.3481355128089  
OR5K2 38.0089018744739 43.7644428186265 42.0621425894624 40.0698728584484  
43.844855336215 45.8325181856483 37.3799542961839 35.4526946152955  
38.0213051227859 39.3698811593364 35.4386677371439 45.5800840647989  
OR5K3 40.308802735799 40.5852276210998 40.6737160001291 39.6705473876526  
41.7419877611072 38.6704566269103 40.4359177791566 39.0620487644635  
42.3277879701507 39.0266821712099 37.8652234126453 38.6454098044474  
OR5K4 39.7320564340365 42.7775752471711 47.2055133646385 40.3180310664156  
44.9384441371181 41.8613406887824 44.8643898647322 47.0362584198466  
45.7206695113999 41.2276963324981 44.1533327883807 44.293922970134  
OR5L1 43.3638918705225 37.3634897565502 38.3166554965434 40.8681871019812  
38.9919142475596 41.1090481599939 41.4742337714895 39.3113207075992  
43.6670755115848 43.7303813515864 41.3945375181463 42.0424641526302  
OR5L2 43.515290338756 39.932537801639 41.8389336728199 42.7489468897708  
42.7107928951766 39.066284740632 42.357910063876 43.6434576713809  
44.293922970134 40.4136535208406 42.0750889188255 42.6278608611758  
OR5M10 38.1713217245067 40.6723334103791 41.3366779545815  
43.2504382247503 43.5544347011646 40.650742261428 44.3440839686558  
42.9887069977696 44.7058233759912 42.6366765186182 43.0971787292711  
39.7411455670172  
OR5M11 44.7915315085948 41.554942319225 38.6005272730664  
41.4273122914951 39.6535880152834 41.3553369544097 40.9157352260901  
44.797320243931 38.1169703906207 42.9866214102525 37.7384958256497  
42.4607795638552  
OR5M3 35.4287975493553 39.2907645923217 38.9790184198145 33.8111782249716  
50.3713170502557 40.9506062495231 38.5066108855005 40.2382908228517  
37.6383530120621 40.1179210534118 37.4642807402741 41.863927676552  
OR5M8 40.7609952437622 40.0952076421149 39.5893773029164 35.0063319869591  
38.5512429290626 40.9506062495231 39.8299340037009 40.8833572570383  
39.7162631015511 38.8295492252264 37.7384958256497 43.5738557773903  
OR5M9 40.7609952437622 42.3550738181144 40.1985790927248 46.3203995372658  
43.7517118200398 39.9397419279057 44.2166118829877 40.1474543172332  
36.6312676076142 39.4710743516517 39.0550139257658 37.9607839934735  
OR5P2 41.0043775553254 43.9421822132391 42.8270038153139 42.8848887336829  
44.7210190486327 39.6609238036815 44.7255207589606 39.4223544019653  
41.5635499110307 37.2089297656361 40.7725311293918 37.7315666632629  
OR5P3 42.9104454767916 35.7012997405508 39.5450079747895 40.5858746708995  
38.3561682218911 37.3799542961839 39.0458123429605 38.7215839727591  
40.7460990419215 40.1179210534118 39.9899430628542 42.1860813954352  
OR5R1 43.0001432913058 35.3307157989724 35.2838283525874 40.7481155008596  
37.7576900881741 40.244271403831 40.5585676679482 37.6557714476853  
37.2810767789306 43.0919221375514 35.6970528713709 39.9519547348106  
OR5T1 35.0202257459026 37.920964499903 38.6005272730664 38.5252456306656  
39.1650142708257 42.8598805316863 41.706879587091 36.2539950294089  
39.853866204927 39.4710743516517 36.6298807161755 42.6758568421347  
OR5T2 42.7613994022988 39.2542963855807 36.8730514568925 36.6062356000449  
40.4639532172338 43.5416683728269 43.2721716572958 38.8159908342801  
40.3662560853635 42.3413611855132 44.4688999098904 44.1861590259178

OR5T3 40.148780650831 43.5873188565519 47.0055981216687 41.4273122914951  
44.2607789091176 40.5281496800812 37.6036146841933 44.7044140979108  
40.5912213523345 44.7958122466628 40.9157352260901 45.9693232070002  
OR5V1 39.4710743516517 42.8542642792862 39.0775870687758 44.9370339275041  
46.5557478175976 33.5578650644246 49.6872467499977 38.956280281655  
48.8842909466002 38.528621456378 45.7328341667151 41.2437378488025  
OR5W2 32.5418171758086 38.1312950900467 32.4466419672036 36.0481934423077  
32.8704945047196 40.5281496800812 35.9894133432376 38.745552403895  
39.0775870687758 37.4302011516587 39.6403089864678 30.1079759183823  
OR6A2 37.7384958256497 38.2263227947189 40.8420925848403 41.3027031037343  
36.9060997041453 35.8227939208521 40.1235656101329 45.0972184964705  
40.9901805728485 45.9004543328976 34.3633615460307 39.3575468494941  
OR6B1 46.6348258763289 46.6314009405034 47.0940613507321 39.5050383901884  
43.4544762830742 46.7800033479223 42.1607322031054 42.4580504587581  
42.2577689927563 48.6124127998952 47.4630625313159 40.4639532172338  
OR6B2 42.8036731479932 36.3110701990588 42.3536549114165 39.853175885492  
36.3390947880186 37.1317006162938 39.8695929627783 40.3357777530419  
41.863927676552 37.920964499903 39.0550139257658 40.4639532172338  
OR6B3 38.957687788868 39.8695929627783 39.5450079747895 40.7481155008596  
40.6723334103791 38.6414316877471 36.08956004634 44.797320243931  
40.6957787921451 40.7063426028871 45.0589947942306 39.0536056496869  
OR6C1 42.1537476443423 38.3322849790657 39.3709357615493 36.6501141438378  
40.4639532172338 41.9543948167375 39.8695929627783 41.1575777497576  
41.3803269429468 41.2276963324981 36.0481934423077 42.57175366709  
OR6C2 39.0620487644635 37.5469247328848 39.991353369336 38.4208429103799  
41.8806343997257 45.6129956328415 36.3194282084339 36.5393857306744  
39.853866204927 32.5178504369282 41.3553369544097 31.5556621809114  
OR6C3 41.1523487516364 35.2143190355414 40.7620472083159 38.8495095797881  
35.2163900400329 42.750861693377 46.5650556481721 36.5393857306744  
43.6670755115848 40.7063426028871 41.8168470823451 39.7411455670172  
OR6C4 36.8072833828297 37.4540772310118 40.4070046183108 39.1706564265495  
40.6723334103791 44.9896851005259 39.3585350448719 39.1652965788406  
33.5578650644246 35.195364621675 40.3452320167286 36.5474283500601  
OR6C6 44.6231541342 39.6995529770239 41.8751578329365 39.3750969348308  
47.0954207417646 36.1190722948669 38.6243997507646 40.831207953647  
38.7298222155532 41.3321861371202 41.5421429082231 45.4799270968969  
OR6C65 46.5549623118323 36.89524015739 36.9795961564828  
40.1804147506786 40.2449343247539 39.9397419279057 37.1643693306382  
36.9355798143571 39.7537274655115 46.7646877499666 39.7342718293432  
38.8495095797881  
OR6C68 39.9697332660833 37.8217989841918 38.8775560911841  
40.5484717678957 37.4470183315826 37.9951997351435 36.8369172900902  
40.6171774724171 35.7973685350741 34.4875013487777 39.9899430628542  
39.4490233720848  
OR6C70 41.4508241771315 48.4980626712175 42.640829914102  
48.4916117779992 40.9950639693255 42.5660695551615 40.6750540874299  
42.157627240486 37.2810767789306 38.1042454705119 46.0905079010237  
41.1554481567603  
OR6C74 44.5282181324797 43.683792219729 46.4569566520107  
42.9358255168086 45.4751076037511 40.650742261428 42.357910063876  
41.9315419791594 39.4762546236449 49.7259371799014 43.1931731665131  
43.7672102682067  
OR6C75 36.4564050256915 39.5050383901884 43.8495248991589  
38.8495095797881 43.2484996523549 34.5886782974123 37.830876898596

40.4359177791566 35.9645119596869 43.844855336215 37.5583886316038  
 38.8495095797881  
 OR6C76 37.4554876386402 41.9894412416874 38.0452862258803  
 40.8681871019812 37.5556299264699 40.7616966228404 35.2163900400329  
 34.4896350146096 35.7973685350741 36.3612409063792 44.7926323492519  
 41.0657892043496  
 OR6F1 44.9896851005259 48.1627097465883 39.2707964550441 47.3574589211166  
 43.2484996523549 36.4986986135769 45.1017494688414 41.6466169548846  
 45.7452456977857 39.7835513496873 38.8507804383261 39.3575468494941  
 OR6K2 35.5179217192467 41.7337506166619 43.6670755115848 41.6564075217517  
 39.7568367479301 44.2607789091176 40.2154497375715 42.7431359850339  
 41.863927676552 41.9666541498638 42.6366765186182 39.1553169409075  
 OR6K3 39.1590964332473 38.1312950900467 39.6451483836089 43.4410741327254  
 39.7568367479301 40.3357777530419 40.3302268293707 41.0381860307445  
 38.8271346375425 41.9666541498638 40.0766543123257 40.4639532172338  
 OR6K6 37.55264801907 40.2493681589104 38.6727842796202 37.0732977341185  
 42.0709558258414 39.3841861812262 34.9344532055397 35.7973685350741  
 40.4997186069494 33.7883338848419 43.3085358214154 40.8681871019812  
 OR6M1 42.5193208629123 41.4508241771315 35.6139301508335 38.8495095797881  
 36.5393857306744 36.1190722948669 38.941855825269 39.3709357615493  
 43.7630587657205 44.6918600441328 36.131485826118 41.2437378488025  
 OR6N1 46.0920218698606 43.683792219729 42.157627240486 43.074472921841  
 35.9058393060637 35.8227939208521 38.4005795891396 40.047314525032  
 40.2274522635576 41.9666541498638 43.3085358214154 41.7575097298927  
 OR6N2 36.4564050256915 41.4508241771315 43.1931731665131 40.1804147506786  
 44.0451487108213 40.3357777530419 39.0458123429605 39.2672712041774  
 36.197424053556 43.401782064778 41.4508241771315 42.2577689927563  
 OR6Q1 41.6354649482853 38.4330755397458 40.5734458834617 38.4208429103799  
 38.2496050953547 43.8582747295766 40.9157352260901 41.7419877611072  
 42.7150227340364 40.1179210534118 46.972521499515 41.0657892043496  
 OR6S1 33.7494761745342 36.5474283500601 41.3366779545815 36.4038860800164  
 37.5556299264699 41.3094485574845 41.1507980856436 41.4061152929154  
 38.7298222155532 39.3698811593364 37.2018803984555 38.3834435509221  
 OR6T1 38.1169703906207 34.5023764006976 36.769073068743 38.3166554965434  
 37.1565984182084 41.159706131351 43.4544762830742 42.4580504587581  
 39.4762546236449 39.6719190054379 39.9070785037411 40.7704587752083  
 OR6V1 46.1673159982664 44.9370339275041 45.310660704531 51.223859150798  
 47.2074332636566 35.8227939208521 47.8947595316832 44.6107027295193  
 45.3756389170606 47.8207974930031 41.0808257270221 55.3563533836982  
 OR6W1P 34.4896350146096 37.920964499903 46.3411353377615  
 34.5425384901279 40.7779767565889 40.650742261428 43.5627649099623  
 40.5158867964016 42.7150227340364 40.5090849993014 41.6336636285875  
 42.357910063876  
 OR6X1 40.2543341073001 42.8542642792862 39.3709357615493 41.0219290963778  
 39.3667161654772 42.0574848021044 36.5806287103157 40.4359177791566  
 42.0621425894624 42.0621425894624 39.4749602565407 41.5536168238478  
 OR6Y1 36.9060997041453 37.10170285405 40.5734458834617 39.853175885492  
 38.3561682218911 37.9951997351435 43.1931731665131 35.4526946152955  
 37.7384958256497 44.4652605017595 39.8184668132023 34.0382693188794  
 OR7A10 40.9558083259517 39.1982470626863 37.8386378737561  
 40.646702696033 36.3390947880186 44.3648993568405 37.3799542961839  
 37.1317006162938 36.8127605061228 38.3092241935352 38.956280281655  
 39.4490233720848



OR7A17 39.7576136507593 45.4882438975269 44.0451487108213  
43.4410741327254 37.2567512265363 35.8227939208521 36.4098694708483  
33.8558232866797 41.5635499110307 40.3235655331796 34.3633615460307  
38.8495095797881  
OR7A5 39.3709357615493 37.8217989841918 35.6139301508335 37.651298468202  
40.0599807618105 47.0940613507321 39.5496902678788 39.1652965788406  
41.2870505273664 40.1179210534118 40.723990462047 40.0557788909923  
OR7C1 39.8662795144616 39.5050383901884 42.640829914102 37.8442841690502  
49.1928206164702 37.7000400506818 38.2933870238743 35.9023742468744  
42.7150227340364 40.8970401536578 36.7283081422707 34.0382693188794  
OR7C2 37.0320432433314 44.2105195734073 43.4709415392696 44.0451487108213  
48.3814421939888 34.9849896310235 42.8684958525042 41.2551966132486  
40.3316153483289 46.1390887492649 45.0589947942306 38.1421709520616  
OR7D2 43.844855336215 41.3610369241157 37.2838080935695 45.8844325913247  
41.2740822675592 39.8455060654531 41.0381860307445 34.5886782974123  
48.5792058061372 42.5664883002833 46.4205654140754 40.1700117452801  
OR7D4 40.3478825593224 40.3384318592985 37.7384958256497 42.8235313007746  
40.2449343247539 38.4330755397458 40.5585676679482 41.2551966132486  
38.6322728994674 44.6918600441328 36.7283081422707 39.7411455670172  
OR7E156P 83.0534943004588 76.1682394916873 59.3164315859919  
60.7148442408147 59.9876575158981 79.909124697198 68.4380822448123  
60.5571721986885 52.1788489555942 57.2231446406982 64.9401081242429  
63.4685821260797  
OR7E24 38.0648056183784 37.958111840848 38.1421709520616  
42.1273928203021 40.4639532172338 42.1046072075724 40.968974769473  
40.2382908228517 36.3352882516399 39.1832968442811 40.4504608195666  
40.9683275553869  
OR7E37P 59.3923286524971 84.7222416138393 54.3554233228353  
42.357910063876 68.307513091369 52.4351670989268 63.928488869459  
56.9299697426319 80.0733119200914 58.7198210787055 54.9765783642973  
58.9836017745712  
OR7E91P 44.1294459089314 48.3077814647455 60.379251900784  
41.2551966132486 42.6575535390785 41.3094485574845 65.524821699432  
81.3978207813439 53.6446045619513 74.6134978387686 55.2828387400799  
49.1718303518849  
OR7G1 38.304249186058 36.89524015739 38.0452862258803 41.0726336841311  
32.5318884330468 40.8634043028528 34.806104801006 37.0390589468421  
35.7973685350741 37.920964499903 38.5668610487033 33.5578650644246  
OR7G2 26.6357008041456 35.4484652445078 31.8679959015659 32.7960913111995  
37.3508690072156 35.4142595025086 35.7055410599146 28.6786952763294  
36.5393857306744 28.5895665533366 37.8372168909583 29.4486614241988  
OR7G3 41.2424637338424 56.6146179789815 38.4043916290561 37.0732977341185  
36.3390947880186 37.9003288112261 39.0458123429605 43.5544347011646  
33.9456837661864 38.3092241935352 43.5710871617107 38.9496515344837  
OR8A1 42.442231667357 35.9305494063137 42.640829914102 43.6726153508978  
37.956732373465 39.6251842352088 40.0052661202207 40.047314525032  
49.0986627051784 49.9493230064613 39.9070785037411 44.2527566343661  
OR8B12 32.742439449766 43.5873188565519 40.301483914446  
40.9607305725196 41.467005949568 39.8455060654531 41.4742337714895  
38.1835938174625 40.4220196471124 42.8936990772838 35.7953070087288  
37.8490162439785  
OR8B2 43.9309845324767 40.9731067463382 40.6737160001291 44.6905691366696  
43.1252272136667 41.8613406887824 42.1607322031054 42.7431359850339  
42.1594905198929 44.2580151149956 42.2618615571566 42.2577689927563

OR8B3 40.5654775358427 42.0709558258414 41.6977706798234 45.1944222548351  
35.3327761997046 41.554942319225 38.1793598983615 37.0390589468421  
33.9456837661864 43.1839109702714 38.1835938174625 38.9496515344837  
OR8B4 40.9558083259517 37.4540772310118 44.1452943804044 47.8164193292842  
35.6434124419782 48.1591264215184 39.3585350448719 42.7431359850339  
41.5635499110307 38.6454098044474 37.2018803984555 41.5536168238478  
OR8B8 44.436995101921 46.4385386401326 35.8265993915844 38.3166554965434  
42.269054475455 41.159706131351 38.4005795891396 34.3865306339645  
37.5469247328848 32.9003644440608 32.6463318577756 35.5523662009011  
OR8D1 39.9697332660833 42.3550738181144 37.5597671487621 42.9358255168086  
40.3452320167286 36.2768299545794 45.3597029614942 40.6171774724171  
40.6957787921451 41.5435611403119 38.8507804383261 42.0424641526302  
OR8D2 44.6231541342 43.0971787292711 36.178547300352 41.3027031037343  
40.6723334103791 44.7804080899431 51.3064929551674 42.9301944191913  
42.8036731479932 42.2614524730856 43.844855336215 36.8690774823319  
OR8D4 39.6609238036815 44.4411734611229 41.437237454134 42.5664883002833  
39.2608760193011 44.8872784170036 42.8684958525042 40.931294690669  
44.7058233759912 40.1179210534118 37.2018803984555 39.2469742642337  
OR8G1 39.6609238036815 45.0115870036541 44.7829632472754 34.6468794865286  
40.148780650831 39.8455060654531 42.1607322031054 42.7431359850339  
46.1101825640108 36.3612409063792 41.9083581529276 43.0930293831497  
OR8G2 36.7356360093603 41.159706131351 39.4710743516517 39.5050383901884  
32.5318884330468 35.8227939208521 41.9393838138203 41.2551966132486  
37.1820543575123 41.6373771565199 41.7272875295469 41.4508241771315  
OR8G5 39.6609238036815 40.2493681589104 41.1367478979484 39.5050383901884  
38.2496050953547 47.4699236780425 47.5963750520409 41.7419877611072  
43.2761454096265 41.4397539024976 43.3085358214154 43.5738557773903  
OR8H1 42.0833588105728 33.7737772393677 45.4634652319753 45.8145523469421  
45.310660704531 45.4882438975269 45.6042625176633 42.1860813954352  
46.5411372437515 47.2299678280724 43.0710577955487 38.8132170743603  
OR8H2 43.515290338756 36.6002100641539 37.9003288112261 37.8088219530989  
41.0476065156912 42.2577689927563 41.5464765641928 39.4322247076926  
42.38204124321 38.2069499294002 38.4689132737495 41.863927676552  
OR8H3 43.3638918705225 47.9665737016961 45.063792968927 45.334106390212  
42.0709558258414 42.5660695551615 42.357910063876 42.2577689927563  
40.4997186069494 44.4652605017595 44.2142581488029 47.3992733452821  
OR8I2 42.8036731479932 37.1685072112618 37.0642268327439 33.8111782249716  
40.6723334103791 42.357910063876 39.4600924554505 37.4484310268909  
38.9834959368496 38.1042454705119 38.956280281655 40.4639532172338  
OR8J1 39.5676051939342 40.4772513262052 40.5734458834617 41.3027031037343  
40.2449343247539 37.33030683349 44.6032218589199 42.1860813954352  
38.9006788676407 38.0540928703622 37.8710943171479 42.4229201717624  
OR8J3 41.2773842727759 38.6704566269103 42.9641759692926 40.2455972565968  
38.7004513165111 38.9378717994178 37.3508690072156 39.2672712041774  
39.6609238036815 39.3113207075992 42.0750889188255 37.7526485343328  
OR8K1 36.7356360093603 39.2907645923217 34.5718473203083 40.1804147506786  
39.3667161654772 36.2768299545794 36.7356360093603 39.0620487644635  
32.7294532998931 37.5343260962758 41.9083581529276 42.8864415494484  
OR8K3 41.6354649482853 36.9994058279362 37.5597671487621 36.6501141438378  
39.1650142708257 39.2985791324641 42.4939802311136 42.0494116081998  
38.8271346375425 40.5090849993014 36.6298807161755 36.3454320848591  
OR8K5 41.7835997867848 39.6493706695391 42.8270038153139 44.0991023527481  
39.9088079891223 42.357910063876 44.9863726205428 42.7965563818112  
41.3803269429468 44.1861590259178 39.4410515050885 44.9070250604284

OR8S1 32.4552405279874 30.9403229851671 38.5045333213784 38.745552403895  
37.7576900881741 44.5544727111028 44.6032218589199 41.0381860307445  
39.853866204927 37.920964499903 34.8383995317036 39.0536056496869  
OR8U1 42.1537476443423 42.6022652963326 39.5450079747895 39.2780515621926  
38.0598374201407 39.132725377815 39.6535880152834 39.9576138799997  
44.619512785899 34.6720534245631 38.2795150354677 40.0557788909923  
OR8U8 40.2543341073001 39.0894172982439 39.1799070031819 38.9534635879195  
41.5668884168669 39.9397419279057 37.3799542961839 36.2539950294089  
39.3750969348308 39.0648733099061 45.1432412071268 37.0953622406687  
OR8U9 42.5534565507139 35.2143190355414 37.7384958256497 36.7186180663551  
40.148780650831 37.8102105794655 37.9430145836712 39.6474008369935  
39.2497056720346 38.7008388965825 37.0603443384602 37.5556299264699  
OR9A2 45.9090659324223 42.8542642792862 43.4709415392696 41.0726336841311  
39.7568367479301 39.2985791324641 48.4859552186772 40.047314525032  
44.2607789091176 39.8873706855774 41.2598458726002 40.3691324547049  
OR9A4 37.2474303302343 43.5182502375207 31.1853651446075 35.0448343468967  
35.4484652445078 33.1602385985469 38.2933870238743 41.2551966132486  
37.0126425326534 39.3698811593364 35.2339574411711 36.1647506311964  
OR9G1 38.5648843914189 42.2900457798748 40.4070046183108 43.8002456102021  
42.7982502551634 38.1169703906207 40.968974769473 39.0620487644635  
38.2215591930186 37.6383530120621 38.8507804383261 43.6753843488695  
OR9G4 45.6517320730042 36.1232327599945 41.3366779545815 47.0874209746031  
47.6884372645373 39.6251842352088 41.0381860307445 43.2551508830106  
37.4540772310118 41.5435611403119 43.6629145624937 44.4475838947656  
OR9G9 39.3709357615493 40.7952353240579 39.8299340037009 43.9282059368202  
41.7929491793697 40.1428591998404 41.3594868055879 41.9315419791594  
44.5303781239209 44.571915452417 41.0050831223107 41.9430737035925  
OR9I1 42.0532901689036 44.0409178714232 57.2107492415265 51.3851157261451  
37.5556299264699 49.2050538150106 49.8281348927244 44.9977782988116  
41.863927676552 44.8997235283254 45.9104478407175 43.6753843488695  
OR9K2 35.2267149016596 36.6968906669565 40.8420925848403 41.5464765641928  
38.8456942580061 42.157627240486 38.7337086062875 35.9023742468744  
41.2870505273664 38.4187686307607 38.4689132737495 38.3291713594599  
OR9Q1 37.4554876386402 41.2598458726002 40.5734458834617 34.4382958501338  
35.9058393060637 43.5752393599169 38.4005795891396 39.3709357615493  
37.4540772310118 42.3606390470387 42.170702295259 39.3575468494941  
OR9Q2 38.8561375693335 39.5050383901884 39.7411455670172 38.3166554965434  
32.5318884330468 44.4619248757502 44.6032218589199 38.079222289614  
40.9901805728485 42.8936990772838 43.5710871617107 40.1700117452801  
ORAI1 64.546412747238 64.9959712888709 86.9032093551446 108.246687420741  
94.1575209300592 66.2167164788023 77.5813459454823 61.2343203799193  
113.218291314173 59.5785089386245 68.0960719007162 57.1441484662045  
ORAI2 43.7585538437696 49.7363778831003 50.8303921211581 48.665578118898  
42.6022652963326 47.7556758818053 43.6753843488695 42.157627240486  
44.619512785899 40.4136535208406 44.9713479185144 43.4709415392696  
ORAI3 55.1306642449627 47.9128504683618 70.8606919488782 61.3747706295648  
55.6069214673486 54.5952754712007 43.6753843488695 46.2779564481158  
66.1448688879431 93.2226507128199 63.6057995724852 66.295597720304  
ORAOV1 143.822560762049 148.63149183467 175.619398238068  
96.3741876853801 214.873872837015 98.7446830481164 182.49650467392  
151.880209200879 783.440408023061 168.145003400654 141.567299023381  
110.626479311082

ORC1L 75.2475238554276 70.5171002055327 56.7776874358774 57.6511495792664  
84.4230484528318 43.8582747295766 87.0685571351947 63.287067794195  
75.891637602914 44.2580151149956 39.9070785037411 45.5800840647989  
ORC2L 138.972884942374 142.221867895111 126.578693258328 103.530430972911  
223.531821464447 103.343354834837 139.472956453414 170.850089909832  
131.766252431636 167.678403380953 157.885718433312 145.267770598988  
ORC3L 81.8104679118753 92.6608453151206 97.5849495690144 102.971363152434  
74.2283328056604 128.300809076274 89.7242042805798 111.404796541459  
94.9104200955155 119.86041265821 109.677588309718 108.937199348319  
ORC4L 54.4384603094793 47.6914221838216 50.2869791217819 58.5406981871153  
59.1948983423381 50.7516773099639 50.3519150282938 42.8482181313226  
50.1603795873336 60.6266092582071 50.5188367542048 48.6037684272115  
ORC5L 107.513442725922 81.5782824513693 81.8648220673828 82.7394574977114  
104.412207245626 81.2314452281031 82.9995913411894 113.860147668006  
104.00520458442 117.948047796034 116.689864825026 97.4327882336954  
ORC6L 5971.45293864208 4381.51418239047 5297.71706629059 4717.02689540013  
3786.90274075023 2588.47871581066 5177.04105968809 6873.84878164654  
3869.93390477952 5855.6498679729 5566.52516420571 4569.48246031279  
ORM1 41.5421429082231 41.159706131351 38.8775560911841 62.8201270538435  
45.2556760873335 44.4619248757502 59.9792284253187 43.4544762830742  
41.7627910693483 40.1179210534118 40.3452320167286 40.5703581862752  
ORM2 40.4639532172338 45.0115870036541 37.6557714476853 40.0698728584484  
42.1650127805175 37.4782441311626 44.0687697278114 37.7612949798895  
42.8036731479932 45.2556760873335 36.0481934423077 40.2669497398702  
ORMDL1 140.226992517573 130.048910817957 115.256208610595  
114.734157967466 175.085270395769 108.493693862509 90.7037473522607  
121.510087314197 112.532906407663 100.499763255098 112.281286038716  
123.336184278054  
ORMDL2 48.2910530887214 45.3486182278177 44.2405728317107  
48.9944486068347 47.3172462673426 35.4142595025086 41.0381860307445  
58.8022152133979 45.2897806651929 42.0621425894624 54.4825201506931  
40.0557788909923  
ORMDL3 131.859371655356 162.902264837659 127.160252453685  
75.9099205260748 98.2280780221631 81.3978207813439 201.360008430353  
245.769212889294 285.901316389161 165.42634596698 160.056757080676  
135.592113666246  
OS9 81.3544712349691 70.9179240997848 99.0596863442346 98.3948200992292  
63.25187762908 87.7460859694899 78.0020909283414 93.9880852748373  
107.148000219752 97.1201502245778 90.2624299533482 73.5599394565136  
OSAP 46.263826584899 41.159706131351 41.1367478979484 42.7489468897708  
43.1252272136667 52.260196361018 40.2154497375715 40.3691324547049  
44.293922970134 49.015238049903 42.7775752471711 45.3763275588341  
OSBP 409.639730837881 402.412173952792 481.905052451245 451.437791473506  
759.184121753305 526.750242877914 1030.31910195147 994.404707955031  
548.815225941887 730.168814097451 755.852629128252 538.427311162325  
OSBP2 46.7293238583888 94.2182728193924 55.2141529491512 44.550322123994  
59.8102324370568 39.0266821712099 110.223625398261 78.4815128101967  
79.7061415085215 92.4534854832186 54.8532558909227 69.6021553604792  
OSBPL10 105.15507796881 164.44912535816 72.0243286940589  
92.3405202477427 131.365512154718 394.990145259101 72.3515874601288  
187.923050034941 90.6516730646251 269.113996642102 252.909964162809  
301.257549182222  
OSBPL11 46.441301934328 48.7084357480922 50.6004078448405  
68.0471049167726 52.2089306840125 48.1591264215184 56.2181240696479

46.3685439301234 54.5952754712007 48.0211752672327 50.8826620053386  
56.7711602236706  
OSBPL1A 55.9669688396835 51.462029007278 55.8166847286859  
71.3932787152381 59.2455550633943 179.694413858411 63.1137861754989  
67.2022549641647 74.6590272639023 108.905276555106 124.204392146484  
118.010166045155  
OSBPL2 94.696942512529 108.542237471193 81.909815795953  
81.588696805606 53.5594683028749 102.791849084945 119.905655993777  
159.52633805025 112.629600281653 145.14768503072 165.42634596698  
126.456130365187  
OSBPL3 60.5948704279864 86.4195039096886 77.7481370715949  
65.3191216270241 47.6153629331146 48.6332750060224 62.9553576299033  
63.7002949745101 80.1077267656485 72.1451513995841 61.3733228199803  
93.955760127914  
OSBPL5 180.916465721523 120.392561825049 168.307676704652  
153.827399203384 105.187381311145 260.792628942353 93.5928272702304  
149.055511050346 117.138945281875 240.731386634957 230.975122271137  
155.050936910986  
OSBPL6 49.1868644496737 51.7495306734657 47.9691830342777  
58.1798515131249 56.2937283136959 57.9559082408796 42.1157692936428  
50.0526763693329 51.4413099192899 49.0841460667818 48.042366934301  
54.400905818898  
OSBPL7 107.034189847828 108.542237471193 209.178131628825  
67.6034960135297 113.18951586976 65.6010220593397 88.5907320965949  
90.9010016862442 119.872031126474 126.218285718433 117.586275152761  
84.056083317311  
OSBPL8 71.2246788429078 65.8455652907556 58.9676332048764  
156.150710793563 55.6617952786921 93.748984888348 84.9863403576284  
75.0873720488265 84.7275805640731 67.7189686993694 64.428683021978  
76.7791768896805  
OSBPL9 244.343381048643 173.5606219477 205.378123452174  
158.57392852619 184.65212689433 197.868575583033 193.364522980854  
168.7696164772 214.245832611737 171.829798001437 173.977605406146  
215.399634344016  
OSCAR 86.8262463672891 63.9179552265502 64.1442136854628 308.025419469334  
61.8924196882984 66.6320017520888 81.3082994649699 70.8749669449099  
45.2897806651929 48.2596564318071 51.8063005897118 50.6141827957642  
OSGEP 116.852483297949 87.7881690937563 115.256208610595 103.734064904898  
81.0259717888094 100.151116279734 79.7564155881026 107.576033955049  
122.504770242427 125.243627451767 95.0604882262201 99.0545942554244  
OSGEPL1 53.3343962424887 56.4199442234707 55.5005760719069  
49.6479308322777 57.3500378622989 54.1440452292081 53.4921736109774  
50.1833483241864 53.9612654850046 48.1392888470269 53.792558158226  
55.7802841481067  
OSGIN1 46.0920218698606 41.9455842688118 43.917817324545  
40.1804147506786 43.3896803974186 50.8533737532786 47.2927436772465  
39.6995529770239 46.4861258030402 41.5804111566887 43.401782064778  
41.9741368971524  
OSGIN2 82.6983700200815 100.403196213407 62.3245608177257  
107.799236230743 93.2630594602634 96.8783070574131 91.983638239817  
57.9713749600418 76.0514378922651 57.4665857273093 57.9864701726379  
74.1282220615085

|          |                  |                  |                  |                  |
|----------|------------------|------------------|------------------|------------------|
| OSM      | 106.70211644918  | 105.796515736125 | 86.6910280940418 | 2733.80542760533 |
|          | 63.0383605052305 | 128.981582396627 | 1370.76188322111 | 105.63434679637  |
|          | 53.6446045619513 | 44.7958122466628 | 42.0750889188255 | 37.2810767789306 |
| OSMR     | 71.3900857589616 | 56.9312835667828 | 60.3155766445629 | 56.9299697426319 |
|          | 65.6824363141962 | 104.305801811472 | 40.6750540874299 | 49.085741080241  |
|          | 60.164635768614  | 40.6022003765153 | 54.0374522273907 | 99.2432911346944 |
| OSR1     | 107.176733647834 | 147.727354881531 | 272.746328542895 | 48.4916117779992 |
|          | 538.153124145211 | 1004.28134410536 | 91.4121563150184 | 92.227126770051  |
|          | 152.054785478928 | 707.4124863603   | 743.463635670141 | 250.993396750789 |
| OSR2     | 56.4553747079294 | 43.4396866157171 | 40.0998167098057 | 50.766576799961  |
|          | 42.0709558258414 | 82.1509530759594 | 46.8613212048981 | 43.4544762830742 |
|          | 42.7606905460304 | 60.6266092582071 | 72.9752827496503 | 45.0035308952466 |
| OSTalpha | 36.8072833828297 | 50.6774883370457 | 40.4070046183108 |                  |
|          | 52.8502823653368 | 106.276392548097 | 38.1169703906207 | 43.3262148375525 |
|          | 37.33030683349   | 132.684895918889 | 44.4652605017595 | 34.4716904283753 |
|          | 41.3481355128089 |                  |                  |                  |
| OSTbeta  | 40.3478825593224 | 38.2263227947189 | 38.8775560911841 |                  |
|          | 43.074472921841  | 39.2608760193011 | 40.040778349137  | 35.6056062164318 |
|          | 43.4544762830742 | 45.0997987980157 | 39.6719190054379 | 36.131485826118  |
|          | 36.9976231206067 |                  |                  |                  |
| OSTF1    | 287.883101814563 | 973.363245512859 | 741.908952472992 | 1060.64261592822 |
|          | 409.312313055794 | 327.631923082696 | 446.37035118289  | 330.037433174255 |
|          | 422.237766234202 | 332.745139672471 | 427.363555286404 | 681.850915393461 |
| OSTM1    | 103.945335792682 | 82.5344501505114 | 67.895735332714  | 171.623830248512 |
|          | 52.4370718282084 | 87.2437977005922 | 53.4921736109774 | 78.3542840447759 |
|          | 50.2223403889892 | 70.0907269565408 | 60.0105984819248 | 86.6854406823303 |
| OSTN     | 35.9305494063137 | 39.8695929627783 | 39.0775870687758 | 39.2780515621926 |
|          | 39.0564222526273 | 49.641159251878  | 40.2154497375715 | 37.4484310268909 |
|          | 41.1742244762318 | 40.2112371512838 | 46.4205654140754 | 35.3525469364579 |
| OTC      | 38.6454098044474 | 40.4359177791566 | 32.7043743065388 | 39.1706564265495 |
|          | 37.5556299264699 | 37.7000400506818 | 39.6535880152834 | 39.1652965788406 |
|          | 32.1218888714537 | 37.6383530120621 | 38.6662194645633 | 43.5738557773903 |
| OTOA     | 41.3387790895716 | 39.1494041371387 | 40.2455972565968 | 40.5484717678957 |
|          | 42.0709558258414 | 39.5637454855233 | 41.8315602975157 | 41.2551966132486 |
|          | 39.5806465938526 | 41.2665909203775 | 40.4057097917487 | 42.9887069977696 |
| OTOF     | 37.2474303302343 | 45.8297734768335 | 53.8435394526667 | 41.0726336841311 |
|          | 42.7431359850339 | 43.6960408897486 | 46.0228732507872 | 64.1777305915695 |
|          | 59.7483827511172 | 46.9498651027418 | 40.1341976911042 | 40.9683275553869 |
| OTOG     | 45.0985088502363 | 40.9731067463382 | 46.5650556481721 | 49.3654837541353 |
|          | 41.1868052124344 | 47.9503724044453 | 43.9450023643394 | 47.8947595316832 |
|          | 42.6366765186182 | 41.5435611403119 | 43.0016969050339 | 41.5536168238478 |
| OTOL1    | 41.7397731376692 | 36.0366673493555 | 35.4484652445078 | 33.8111782249716 |
|          | 38.1644569189523 | 40.8634043028528 | 34.5633623842083 | 35.3608605269276 |
|          | 42.6366765186182 | 36.2435874904689 | 35.046946054314  | 40.8681871019812 |
| OTOP1    | 42.3433931248155 | 39.8695929627783 | 42.3536549114165 | 40.7481155008596 |
|          | 35.9894133432376 | 39.3841861812262 | 41.5817737564592 | 45.3872406432794 |
|          | 42.992884918158  | 37.7315666632629 | 44.0409178714232 | 41.7575097298927 |
| OTOP2    | 39.3709357615493 | 45.4882438975269 | 47.2055133646385 | 39.5050383901884 |
|          | 43.004943518025  | 38.5252456306656 | 40.7910160811527 | 44.0390019242862 |
|          | 37.4540772310118 | 38.745552403895  | 44.2925355984056 | 44.6484005362281 |
| OTOP3    | 35.4287975493553 | 39.9697332660833 | 41.1367478979484 | 37.5382094267692 |
|          | 30.6242215267208 | 38.9378717994178 | 35.9058393060637 | 38.6454098044474 |
|          | 36.0741672064298 | 37.1275334308172 | 37.2892641289258 | 37.2810767789306 |

|        |                  |                  |                  |                  |
|--------|------------------|------------------|------------------|------------------|
| OTOR   | 41.8409927585705 | 41.3610369241157 | 43.6039443285137 | 41.3567204694281 |
|        | 38.9919142475596 | 36.9060997041453 | 40.968974769473  | 38.132587347852  |
|        | 42.6762317063737 | 40.9558083259517 | 39.5792604499113 | 39.1553169409075 |
| OTOS   | 38.2083710281545 | 45.5842286511645 | 47.9035532886869 | 45.0798408927912 |
|        | 38.2496050953547 | 37.7000400506818 | 40.7910160811527 | 42.2577689927563 |
|        | 39.853866204927  | 42.3606390470387 | 31.6063174764616 | 39.1553169409075 |
| OTP    | 44.7915315085948 | 44.6360645306497 | 41.7419877611072 | 43.367124590178  |
|        | 46.4343327861696 | 39.1664256481434 | 41.0871827071116 | 42.4926864381766 |
|        | 42.6762317063737 | 45.4614234442527 | 41.2598458726002 | 43.4290452504928 |
| OTUB1  | 68.1969125201241 | 101.468662074178 | 91.5230424957075 | 65.3191216270241 |
|        | 147.875578127733 | 68.1513215633609 | 123.247207157645 | 114.429965793669 |
|        | 102.457537266105 | 93.9805435116156 | 98.403191200835  | 70.8835636550472 |
| OTUB2  | 44.5282181324797 | 44.8942011457385 | 50.2869791217819 | 47.481302504066  |
|        | 47.0533794594844 | 44.3236524597291 | 41.6520912742594 | 41.7932258301997 |
|        | 52.0042367882776 | 47.0627306565247 | 43.6960408897486 | 45.2189250687483 |
| OTUD1  | 72.2610650652674 | 55.6735944873518 | 48.3458108324478 | 92.3034609409756 |
|        | 47.6884372645373 | 68.1311562787361 | 56.5763837326326 | 65.2464683900404 |
|        | 57.8772482723463 | 62.6532574724345 | 62.3285777410103 | 56.4578213622965 |
| OTUD3  | 42.442231667357  | 48.4980626712175 | 40.7620472083159 | 41.3027031037343 |
|        | 41.7929491793697 | 38.6414316877471 | 39.3585350448719 | 42.0494116081998 |
|        | 40.0403898620771 | 38.0078357808393 | 39.4410515050885 | 41.0657892043496 |
| OTUD4  | 65.8959431201418 | 66.5461118812206 | 77.4246856935596 | 82.4084917533632 |
|        | 78.1952428431942 | 69.9144520559912 | 61.1129808051181 | 58.4863562654193 |
|        | 76.9535968101411 | 63.2561817029853 | 74.2429851177794 | 70.1238785863433 |
| OTUD5  | 43.2724556187214 | 54.9392038576957 | 50.6987358483181 | 46.1673159982664 |
|        | 50.3713170502557 | 49.9699131196797 | 51.5967098638347 | 52.407151732257  |
|        | 51.5888395924843 | 55.6865353018811 | 60.9446532180211 | 58.9069025298754 |
| OTUD6A | 42.3433931248155 | 42.3550738181144 | 44.0451487108213 |                  |
|        | 43.4410741327254 | 41.467005949568  | 40.5281496800812 | 40.9157352260901 |
|        | 44.5029690493211 | 35.3227485563945 | 41.4397539024976 | 44.4688999098904 |
|        | 44.5432192783161 |                  |                  |                  |
| OTUD6B | 82.1974756449763 | 89.7554896946341 | 72.7987593815919 |                  |
|        | 67.6034960135297 | 161.305278902051 | 91.4446109489387 | 76.6094442444074 |
|        | 55.3664856922473 | 102.322851896214 | 58.2167393576361 | 71.1607965028029 |
|        | 78.1132840562953 |                  |                  |                  |
| OTUD7A | 41.4905114972525 | 41.0269624684418 | 41.263535866568  |                  |
|        | 42.4580504587581 | 41.8503210829559 | 42.357910063876  | 41.2040352443154 |
|        | 41.8417024632349 | 42.3214282169749 | 38.8507804383261 | 41.6336636285875 |
|        | 43.6285248402465 |                  |                  |                  |
| OTX1   | 40.7609952437622 | 41.9894412416874 | 55.8810837854139 | 39.853175885492  |
|        | 58.9875400392427 | 41.0582900711341 | 63.1604223919703 | 45.9604707098953 |
|        | 58.5561424827901 | 43.1839109702714 | 41.2598458726002 | 43.7672102682067 |
| OTX2   | 41.5787026298957 | 40.7952353240579 | 42.3536549114165 | 43.3744503319109 |
|        | 42.352235481637  | 43.8227482938742 | 39.9397419279057 | 42.6008809597607 |
|        | 40.646702696033  | 43.844855336215  | 42.5426057453993 | 40.3330033416496 |
| OVCA2  | 41.8409927585705 | 43.9421822132391 | 39.7411455670172 | 44.6905691366696 |
|        | 36.5393857306744 | 35.5158505219112 | 39.3585350448719 | 41.3506832276112 |
|        | 46.9739160257217 | 41.8613406887824 | 35.6970528713709 | 40.2669497398702 |
| OVCH1  | 33.2552842693684 | 33.939263369489  | 39.7411455670172 | 37.4223289687135 |
|        | 39.3667161654772 | 32.2133093774284 | 40.2154497375715 | 40.2382908228517 |
|        | 33.802253812079  | 37.3179578037963 | 35.046946054314  | 41.9430737035925 |
| OVCH2  | 35.4287975493553 | 34.5023764006976 | 45.063792968927  | 42.4580504587581 |
|        | 41.467005949568  | 39.2985791324641 | 41.0381860307445 | 36.43924066428   |
|        | 35.6139301508335 | 41.3321861371202 | 41.3553369544097 | 37.9607839934735 |

|       |                  |                  |                  |                  |
|-------|------------------|------------------|------------------|------------------|
| OVGP1 | 73.7133884699889 | 139.472956453414 | 101.2615980834   | 137.095435683619 |
|       | 92.5135737873857 | 84.3755392205436 | 71.0369238830779 | 90.2915974511786 |
|       | 77.7907484334847 | 306.94883838074  | 133.981674663494 | 264.495576211074 |
| OVOL1 | 47.1216490839161 | 129.984065394671 | 52.4485219671976 | 43.1275490164761 |
|       | 55.9283039581662 | 41.9069736908705 | 97.7620313090597 | 76.4212570031171 |
|       | 79.2824265044758 | 66.1851600557127 | 55.9604109457703 | 46.8129509799753 |
| OVOL2 | 184.536327776767 | 210.096514889445 | 301.025314855652 | 43.8002456102021 |
|       | 215.033807819308 | 48.260931742163  | 340.962490240304 | 248.390047812338 |
|       | 215.68113524702  | 203.353724675525 | 180.15711251649  | 179.342338803631 |
| OVOS  | 42.2455707947223 | 43.5873188565519 | 41.9666541498638 | 39.3750969348308 |
|       | 51.3511088648386 | 48.5835484742456 | 46.1634822993009 | 39.7509165247419 |
|       | 45.4799270968969 | 41.6373771565199 | 44.9713479185144 | 36.1647506311964 |
| OVOS2 | 40.7988621011332 | 42.5669070495246 | 39.5032015229125 | 41.0726336841311 |
|       | 43.6587492470348 | 42.4026480597025 | 39.9648352258645 | 41.3941221376309 |
|       | 43.3219438366504 | 43.7937218983401 | 44.1483976313959 | 39.1790517315259 |
| OXAL1 | 367.343410874234 | 285.689076149891 | 349.767857026458 | 257.050603883498 |
|       | 220.337850438943 | 269.284584971871 | 161.793366042179 | 178.496935603128 |
|       | 249.451753363306 | 240.58403560014  | 229.379918828848 | 245.540041661003 |
| OXCT1 | 38.957687788868  | 46.29198852834   | 56.4779645313958 | 55.2214187655851 |
|       | 56.5933259268408 | 83.7019398654324 | 50.8388984085636 | 69.3468840908665 |
|       | 48.1174861108648 | 54.7827221235949 | 59.8509516999438 | 63.3974067065125 |
| OXCT2 | 91.0346886951891 | 80.882176929636  | 59.2012779686869 | 84.4422623834916 |
|       | 122.0305509548   | 60.877229406755  | 137.764748752401 | 125.333208461509 |
|       | 155.378768637562 | 65.0928075335306 | 57.6831182451733 | 57.0524725494273 |
| OXER1 | 39.7576136507593 | 41.0678614026819 | 37.8386378737561 | 39.2780515621926 |
|       | 40.7779767565889 | 58.4435847520801 | 47.5963750520409 | 44.293922970134  |
|       | 46.2027193115397 | 40.5090849993014 | 48.2910530887214 | 46.5650556481721 |
| OXGR1 | 37.9684178523773 | 71.9539136431119 | 34.2890785915814 | 38.4699622716254 |
|       | 45.6409129284202 | 39.8455060654531 | 49.8281348927244 | 47.3172462673426 |
|       | 47.7086093893038 | 44.6235437216725 | 43.5710871617107 | 41.5961238651523 |
| OXR1  | 507.239294307089 | 811.142611128461 | 651.078746026341 | 388.580556899321 |
|       | 286.497342437243 | 578.601842980701 | 537.213035625492 | 213.590067519021 |
|       | 562.258108316474 | 817.631505579476 | 779.333013700435 | 860.845934376155 |
| OXSM  | 55.5276281380084 | 54.4793574349739 | 55.2141529491512 | 51.223859150798  |
|       | 95.6182216943758 | 54.5952754712007 | 59.5205055437765 | 47.2009420656854 |
|       | 67.3230935444252 | 54.0374522273907 | 47.0940613507321 | 62.9904770954043 |
| OXSR1 | 342.829992044257 | 455.444228161475 | 454.701322158431 | 602.726022292973 |
|       | 1254.72625904639 | 509.004054793277 | 684.865133028228 | 588.736435715365 |
|       | 559.296669575666 | 674.270050283701 | 561.855286945959 | 589.395944599882 |
| OXT   | 50.379587451669  | 43.7644428186265 | 42.3536549114165 | 40.9607305725196 |
|       | 40.7779767565889 | 45.0882356578404 | 50.5252048155459 | 37.4484310268909 |
|       | 36.8127605061228 | 45.0155543555707 | 45.2265319826548 | 40.4639532172338 |
| OXTR  | 39.1590964332473 | 38.0226905622357 | 40.5734458834617 | 36.1562979552173 |
|       | 41.3755760434934 | 42.2577689927563 | 37.6036146841933 | 51.6660481331154 |
|       | 38.0213051227859 | 41.3321861371202 | 45.310660704531  | 43.3744503319109 |
| P11   | 41.4508241771315 | 49.5443425465542 | 47.646800205189  | 50.0526763693329 |
|       | 51.0107745412152 | 57.0775902639215 | 43.6753843488695 | 46.3685439301234 |
|       | 50.7619345314571 | 44.1379638573455 | 46.7386599624801 | 40.8681871019812 |
| P15RS | 218.552143403657 | 591.192020333181 | 514.70012608304  | 324.994911416877 |
|       | 250.040637073537 | 657.59007878546  | 284.66531382201  | 476.653723741096 |
|       | 553.707482409148 | 1014.6400720037  | 781.923984640049 | 697.57030127315  |
| P2RX1 | 43.4626049853157 | 54.7855575216687 | 52.5353664902258 | 104.99788782377  |
|       | 45.3675390992851 | 385.36587480414  | 53.8687221233237 | 46.3685439301234 |
|       | 44.1519466943185 | 563.927521628693 | 319.408264906288 | 127.949712300256 |



P2RX2 44.4533646714104 41.3610369241157 41.0726336841311 42.1594905198929  
40.9950639693255 49.4886948431479 39.6202217514002 42.4034864825901  
43.8052993451586 50.5868854091439 47.4630625313159 40.2245383869822  
P2RX3 42.0778399888414 40.1989248349075 41.7442113152211 39.2469742642338  
42.1335978926921 40.0793375723997 44.8643898647322 40.9901805728485  
39.9444191873552 42.6793753550854 39.7342718293432 40.9058811573481  
P2RX4 203.53267380432 71.0340758556049 67.1299518044849 295.014183084118  
69.1862663389904 89.0495215957248 174.985336606027 115.328304312071  
170.593589984253 111.511934617893 132.973097496421 109.594402843796  
P2RX5 45.9426591985894 42.6450179841129 39.1799070031819 41.3567204694281  
51.4092491522288 38.7340969861754 46.3057385979341 38.4540849632254  
40.4997186069494 39.7411455670172 39.7342718293432 42.1537476443423  
P2RX6P 38.1169703906207 42.2577689927563 41.0356368374708  
38.9534635879195 42.6022652963326 45.0882356578404 41.253645578517  
41.0381860307445 41.1742244762318 39.4710743516517 48.9754340235127  
40.2669497398702  
P2RX7 108.815245119101 78.9900928241723 79.7733480606334 220.11066803442  
73.0433648756396 94.7980740999988 88.0664425843955 91.9919654450652  
73.7873098190297 80.6634117492762 85.2598847559951 79.4710406831985  
P2RXL1 40.8681871019812 40.7952353240579 39.8299340037009  
35.9521941716188 39.4693871570028 41.9543948167375 40.9157352260901  
39.4710743516517 37.1820543575123 40.3235655331796 40.9157352260901  
42.6758568421347  
P2RY1 43.844855336215 42.1607322031054 39.9101908547397 45.1944222548351  
51.940083408061 42.8598805316863 45.1017494688414 43.4544762830742  
48.3119523820103 44.0409178714232 45.1432412071268 40.3691324547049  
P2RY10 42.3433931248155 56.5896227808363 43.8153459269057  
47.6687908290818 38.9496515344837 40.8970401536578 36.9976231206067  
41.7877325563821 40.1738310955128 37.0740019672788 41.4508241771315  
40.9683275553869  
P2RY11 129.143252341926 119.700522283289 67.3469281984384  
101.144615206297 173.977605406146 85.1544284060549 94.1289383735162  
99.6392844274488 119.333788465158 86.2118355769367 95.4841914842335  
83.9873645051122  
P2RY12 44.3355304829989 46.6996902348633 47.3861758958576  
47.3574589211166 40.5710637884029 56.8505380943422 44.9863726205428  
41.6466169548846 42.8036731479932 41.0057887014368 38.4689132737495  
46.917149434588  
P2RY13 42.5506742787391 55.012605207172 52.5353664902258  
225.50098418159 42.7107928951766 65.1516921033166 55.4004611309636  
45.9159813905292 43.7630587657205 52.4351670989268 45.6348103033479  
41.5083179498332  
P2RY14 42.3675565493382 41.7337506166619 39.050952280947  
49.836101145667 38.9496515344837 63.6222532132037 41.8887298788489  
37.3799542961839 41.809704036355 42.3346523186171 42.7815195866158  
43.2776458914333  
P2RY2 50.3483661740202 55.3985593283201 53.1221282279739 50.3221380889396  
52.8700608656297 42.9083290030575 61.9432904657734 49.7714934071587  
64.2174369755376 60.8250302910721 55.7469393723377 56.5715090634345  
P2RY4 36.2496364442264 47.3536182445315 41.0356368374708 41.7614975630362  
36.7356360093603 41.6590564937735 37.9430145836712 45.2806199505029  
42.4540072551568 39.2623423164488 33.9478220100351 39.8497227447888

|           |                  |                  |                  |                  |
|-----------|------------------|------------------|------------------|------------------|
| P2RY5     | 132.117013391364 | 192.732356915298 | 137.955007835039 | 135.138667957956 |
|           | 101.867388894697 | 131.126942328593 | 191.631209717054 | 74.8893925448138 |
|           | 111.939677225005 | 182.576662575358 | 179.064697219173 | 307.264133974364 |
| P2RY6     | 57.5824211891806 | 52.7493349111555 | 47.4740726032707 | 63.3663842322796 |
|           | 40.8873907150245 | 51.9885249508283 | 45.0241191707651 | 42.985929467107  |
|           | 46.8873421271259 | 47.5522798201057 | 45.270814840882  | 46.2625470410195 |
| P2RY8     | 51.8781065691038 | 94.8766888888828 | 67.3469281984384 | 306.174148874454 |
|           | 49.8304479381623 | 47.0027453663546 | 43.8206425661746 | 69.6473843718254 |
|           | 42.992884918158  | 48.4890615340603 | 64.3032703931013 | 52.1186591838715 |
| P4HA1     | 88.7317458991091 | 78.0870333663165 | 77.2834482217973 | 107.242476674629 |
|           | 69.5741225986433 | 64.2512089157122 | 55.6268253440479 | 44.3521099857368 |
|           | 267.70610731202  | 60.0793579902362 | 59.2903915056319 | 112.316483867372 |
| P4HA2     | 397.199620114138 | 99.4633962228768 | 160.203825526096 | 166.064317271991 |
|           | 96.221685383385  | 183.393353108744 | 99.4458090623294 | 118.736188485344 |
|           | 180.648144492464 | 101.877183008944 | 99.7361599442168 | 134.736333062531 |
| P4HA3     | 39.8662795144616 | 41.554942319225  | 41.8751578329365 | 47.8164193292842 |
|           | 40.2449343247539 | 44.0804700754786 | 48.0283573444179 | 45.9604707098953 |
|           | 41.3803269429468 | 44.6918600441328 | 46.0905079010237 | 43.4709415392696 |
| P4HB      | 2721.97551918611 | 2803.11698341125 | 2294.75523373329 | 2206.44541412808 |
|           | 2498.54878472152 | 1287.41527826233 | 3818.71752181269 | 3114.05035137552 |
|           | 4381.51418239047 | 1921.48678333837 | 1749.06320703181 | 1071.64675274806 |
| P53AIP1   | 44.436995101921  | 39.1539892144371 | 40.9818899755491 |                  |
|           | 36.9912468186322 | 47.2862299990937 | 38.6704566269103 | 39.2780515621926 |
|           | 39.7509165247419 | 38.8271346375425 | 41.5435611403119 | 41.3945375181463 |
|           | 39.2839132447749 |                  |                  |                  |
| P704P     | 67.2437599548936 | 84.3672289945664 | 71.0340758556049 | 69.8314582428552 |
|           | 73.3533274030352 | 79.953657052127  | 68.4380822448123 | 61.6839343510302 |
|           | 69.2001494999588 | 48.3693338695392 | 51.1483696410762 | 61.7502624458447 |
| P76       | 159.393207489822 | 75.5775406974686 | 68.8098607236981 | 159.618353114269 |
|           | 87.2282539094452 | 145.170590045628 | 77.0003455479124 | 111.153589230866 |
|           | 92.261357059727  | 115.643361390258 | 83.3729277601518 | 68.1513215633609 |
| P8        | 206.103296228683 | 46.3635803515159 | 61.5824518349507 | 120.807573842238 |
|           | 68.0414563597154 | 250.210134743225 | 43.4544762830742 | 54.5125550937898 |
|           | 86.1741504863717 | 132.604567913122 | 167.824386984618 | 158.321459945365 |
| PA2G4     | 293.217518524507 | 334.726233105118 | 298.282957415786 | 211.227389226633 |
|           | 286.996922972683 | 286.340091833711 | 469.30167430316  | 570.997661726825 |
|           | 424.539111965342 | 276.939964364659 | 335.569876624791 | 232.193215437232 |
| PA2G4P4   | 49.3463416794995 | 35.0222940937513 | 35.4484652445078 |                  |
|           | 39.066284740632  | 37.2567512265363 | 38.1169703906207 | 40.9157352260901 |
|           | 34.6977013306396 | 40.7847110517594 | 35.195364621675  | 30.493888765264  |
|           | 39.6352613956998 |                  |                  |                  |
| PAAF1     | 139.121494956408 | 104.964345794911 | 189.890451486324 | 133.810601514962 |
|           | 162.569762535436 | 195.303781999387 | 163.995560004001 | 155.693953208351 |
|           | 184.938142193035 | 212.92335057985  | 223.219262492785 | 230.520772006119 |
| PABPC1    | 2039.89728774097 | 4948.93803183911 | 2992.62035058532 |                  |
|           | 1333.01876209753 | 5218.25814076207 | 1856.97585515091 | 5811.22276358172 |
|           | 2944.3433949897  | 5156.59948231705 | 1031.4414268329  | 1291.71781703042 |
|           | 2045.24530722676 |                  |                  |                  |
| PABPC1L2B | 44.2350046179299 | 41.0678614026819 | 44.3344900481112 |                  |
|           | 38.3166554965434 | 43.6587492470348 | 44.1737502492846 | 39.1539892144371 |
|           | 38.8495095797881 | 44.4395580493118 | 39.7835513496873 | 42.170702295259  |
|           | 38.5279745308203 |                  |                  |                  |
| PABPC3    | 48.6621527194963 | 57.0082102559228 | 44.8872784170036 |                  |
|           | 45.7397504535169 | 60.8899937371383 | 47.0027453663546 | 64.8367546135053 |

46.3685439301234 70.4933405598359 38.3092241935352 43.1724740315182  
 49.5539622682049  
 PABPC4 1640.74027400791 2280.42953098693 2663.19221471348  
 1362.12587130194 3202.8848520816 1630.25992078321 1914.9556343048  
 1433.1813604069 5047.91205452316 1465.08435775014 1279.02702402372  
 1513.74711975248  
 PABPC5 41.3848620620968 40.4003119241613 39.1553169409075  
 42.5269793679335 44.0451487108213 44.1379638573455 38.0598374201407  
 38.4540849632254 42.2136642947793 41.2747736315207 40.4166536885831  
 41.809704036355  
 PABPN1 653.880422442079 468.267514612816 592.989860385203  
 385.439417884202 451.437791473506 346.438778257772 470.231929311877  
 672.759115794267 608.005012673672 746.847753035399 768.354209323884  
 501.817654561915  
 PACAP 45.2875173643252 47.3536182445315 46.5650556481721 78.0020909283414  
 40.4639532172338 38.3418933808844 43.0930293831497 46.0633179231318  
 35.6139301508335 38.0078357808393 45.1432412071268 36.3454320848591  
 PACRG 39.5004961867638 41.4508241771315 45.3675390992851 39.5050383901884  
 41.6806984441849 37.4782441311626 39.4916414839923 37.936704020708  
 41.3468610075772 47.9056710878325 47.299647867533 43.3262148375525  
 PACS1 118.49449420132 124.490684428024 140.719373122712 123.978615472736  
 121.354667375673 122.599723509633 170.87055409699 154.959129917681  
 115.482982633699 186.372887375058 185.874151272261 139.294987640071  
 PACS2 120.129857395808 65.8082111065882 97.1271615802556 76.9373289454707  
 80.1294564809102 107.538934056558 73.4820932957859 108.463445585898  
 92.9388175558241 95.1000239210194 101.187156681366 86.6105153696374  
 PACSIN1 52.109723558511 65.2966707319433 54.842638106265  
 75.2475238554276 198.754967214875 68.4323624797175 121.195506364658  
 104.822963389102 96.2385885003071 50.6486940895674 44.7114813656401  
 40.0557788909923  
 PACSIN2 1046.42391243532 579.038638774301 877.673009984357  
 949.60074350774 381.613092202209 698.595302020108 632.019639546131  
 517.440530573161 666.265306908449 777.854349637516 1016.13142851085  
 555.727708387209  
 PACSIN3 79.6581393791238 97.1271615802556 121.650910373947  
 54.2886483704949 101.383978726419 106.590506599473 100.650129064849  
 127.345094323724 176.224645007435 118.93749473833 91.3723635213821  
 135.259585457958  
 PADI1 55.6268253440479 42.5269793679335 40.6737160001291 55.4180794172794  
 45.6895223823001 38.6414316877471 45.8980298854198 38.2782436497441  
 46.3203995372658 43.2988017098387 43.1931731665131 43.6753843488695  
 PADI2 39.6609238036815 35.8227939208521 34.3633615460307 38.2041059863839  
 38.2496050953547 41.2567470068038 38.8417151851134 37.5511560880902  
 38.2215591930186 38.3092241935352 37.2892641289258 40.5703581862752  
 PADI3 897.198663109723 212.945601743319 876.959744461441 47.3574589211166  
 198.652987129375 63.3612993417558 363.269936098507 227.535855856645  
 1426.87261062373 1182.10714525377 1426.87261062373 309.293546994308  
 PADI4 39.6609238036815 51.8610060995363 55.8810837854139 126.599642760314  
 49.9493230064613 102.24202987437 112.281286038716 44.9977782988116  
 48.0163377492228 40.4136535208406 45.5707650534259 45.3763275588341  
 PADI6 42.5193208629123 40.716553247236 42.9104454767916 42.0102671859606  
 42.1650127805175 45.2852528185486 43.6753843488695 38.2782436497441  
 39.4762546236449 48.3693338695392 47.299647867533 39.6352613956998

PAEP 43.1267841876606 38.7344853699576 38.5442780220289 40.8084239472012  
44.147557390293 44.8872784170036 37.8877750141557 41.0381860307445  
39.9444191873552 39.7411455670172 39.9070785037411 40.5235471987417  
PAF1 221.383645621978 188.552900887757 179.040571908629 238.120731107691  
239.070294068861 295.312692092025 443.722380814789 270.487135967976  
245.923368125413 239.425856083354 293.702642091269 193.875712862166  
PAFAH1B1 206.103296228683 204.606913997301 194.666769955149  
206.610705620712 125.786923817078 269.681925095165 148.016994658777  
76.6094442444074 128.151545864228 178.661935292895 222.696947669812  
262.024495926094  
PAFAH1B2 47.0940613507321 47.5647821785529 40.1985790927248  
41.8778873678551 50.2163892855092 41.3553369544097 40.1235656101329  
38.4540849632254 46.2027193115397 37.6383530120621 38.8507804383261  
44.3521099857368  
PAFAH1B3 1052.91661429671 1134.52018899688 744.762787024945  
224.976641879383 1234.59589464045 284.575587310164 1497.73669971925  
1069.3975598703 1257.19844370057 462.105603187328 305.684635013927  
261.138426747953  
PAFAH2 110.935994444429 101.192523227755 138.50445813694  
88.7703546775492 90.385018479478 76.331185787832 91.2330127140591  
168.640033281185 91.1834104205004 140.484790183918 156.276838862671  
133.911556922212  
PAG1 55.8218917166321 86.3054012048636 68.5689807788431 173.18824792041  
64.6374507338031 52.7156971154405 50.1314528043038 71.0211264570699  
58.7844458514344 85.4420599474339 88.1331756561668 74.1686961093736  
PAGE1 38.7537364570873 41.0678614026819 37.6557714476853 42.8235313007746  
39.5595233162192 37.0180934800573 41.1507980856436 41.0381860307445  
38.9006788676407 35.195364621675 35.860430241131 43.4709415392696  
PAGE2 39.8662795144616 41.0678614026819 40.6737160001291 44.9370339275041  
44.0451487108213 36.8059561571675 37.7136011474903 43.4544762830742  
41.074824727477 39.6719190054379 38.5668610487033 42.9887069977696  
PAGE2B 39.3709357615493 38.7344853699576 42.157627240486  
36.4564050256915 42.3685136297603 37.9003288112261 37.9430145836712  
37.6557714476853 36.6312676076142 30.3383368296776 38.1835938174625  
38.5279745308203  
PAGE3 38.304249186058 43.7644428186265 44.696023817801 40.9607305725196  
39.2608760193011 39.6251842352088 46.1634822993009 41.0381860307445  
39.7537274655115 42.6793753550854 43.0016969050339 39.4490233720848  
PAGE4 38.7537364570873 37.4540772310118 39.9101908547397 49.5424425850549  
33.2021437980841 39.8455060654531 38.1793598983615 40.047314525032  
38.5252456306656 35.4990901121893 40.9157352260901 41.1554481567603  
PAGE5 40.9999112795884 39.3999056968598 41.528370959196 45.0798408927912  
40.1846227436522 38.7537364570873 39.9397419279057 44.7534143226043  
42.4864576619427 42.785429206422 41.3277288245157 39.3931655934497  
PAH 37.8386378737561 38.2263227947189 40.5386195997545 42.0102671859606  
42.7982502551634 40.5805725503899 44.8643898647322 40.831207953647  
38.8271346375425 46.441301934328 38.3166554965434 37.9607839934735  
PAICS 330.737070535671 659.126408705362 431.353025968649 250.799060762208  
1342.10592868516 408.739953606815 641.462632112151 357.254500791202  
595.790464730847 207.768377497439 318.690767783738 370.495645380436  
PAIP1 48.7089777508857 45.2134010996333 44.4311655729487 49.9506025936211  
49.9493230064613 49.641159251878 49.8865955311391 46.8954576545929  
46.9094108823995 43.119837808537 47.6333826891425 45.6162785059562

|             |                  |                  |                  |                  |
|-------------|------------------|------------------|------------------|------------------|
| PAIP2       | 204.944787289897 | 259.812381486915 | 207.245428311682 | 318.527516338791 |
|             | 213.590067519021 | 299.524171071613 | 223.501516374076 | 159.884578124679 |
|             | 379.280296622892 | 137.378222527303 | 158.17598244564  | 331.474920376907 |
| PAIP2B      | 38.6454098044474 | 42.9358255168086 | 42.7303139017786 |                  |
|             | 42.9358255168086 | 39.7568367479301 | 44.2607789091176 | 40.6750540874299 |
|             | 39.4710743516517 | 40.9901805728485 | 39.8873706855774 | 46.0905079010237 |
|             | 45.0035308952466 |                  |                  |                  |
| PAK1        | 111.954989477689 | 116.967446594767 | 89.4747568145717 | 127.789065386943 |
|             | 98.93324263369   | 135.567012693522 | 123.868848519181 | 73.2037966614621 |
|             | 142.945182805248 | 189.47090669378  | 145.64473441957  | 172.540737848092 |
| PAK1IP1     | 147.9291840243   | 87.9297641099558 | 90.807818984128  |                  |
|             | 102.365615739399 | 310.255767356827 | 126.319731178054 | 93.748984888348  |
|             | 218.999184133546 | 143.607457611143 | 81.4269715766354 | 89.737418965763  |
|             | 120.825113658705 |                  |                  |                  |
| PAK2        | 100.708709225818 | 134.356066830552 | 109.525921548011 | 179.779145453083 |
|             | 145.676955166566 | 115.213198315106 | 139.679585117348 | 97.0254711947754 |
|             | 118.341308125578 | 103.080153415433 | 92.9820860411485 | 111.939677225005 |
| PAK3        | 45.2875173643252 | 37.8217989841918 | 46.4569566520107 | 44.6905691366696 |
|             | 40.2449343247539 | 37.3799542961839 | 46.7100796279384 | 53.7378346199838 |
|             | 42.4540072551568 | 41.2276963324981 | 48.2050207071554 | 37.7526485343328 |
| PAK4        | 82.2431666775699 | 79.3315961732103 | 80.3730667493235 | 44.2136352943411 |
|             | 110.729504563799 | 56.4819802857598 | 138.568626520133 | 95.1513370156467 |
|             | 117.598001907902 | 83.5069968129733 | 100.597578643877 | 77.5290879537731 |
| PAK6        | 67.6767845246581 | 77.8946473414547 | 75.9174504780598 | 44.265834798964  |
|             | 74.9661773375536 | 48.7781962164988 | 89.4747568145717 | 70.7238101239421 |
|             | 163.493389267264 | 150.829277770546 | 117.282216847547 | 106.804269453898 |
| PAK7        | 40.6559419616644 | 51.2066664465185 | 50.7774722329703 | 45.334106390212  |
|             | 43.2484996523549 | 47.1477056711335 | 41.4742337714895 | 45.7003272484265 |
|             | 50.2953638261991 | 43.9783383422823 | 42.2618615571566 | 47.646800205189  |
| PALB2       | 63.6767189846426 | 75.8280474316969 | 90.2638559113894 | 78.0020909283414 |
|             | 83.5069968129733 | 65.9014252111112 | 81.8569832022381 | 85.2849531543957 |
|             | 77.5480089703916 | 70.2565873027242 | 69.4877749654481 | 61.9882398986333 |
| PALLD       | 763.947361966861 | 294.372319595103 | 165.029434090892 | 362.123479430887 |
|             | 347.908556198025 | 3055.1209535841  | 124.112216491975 | 436.216696884703 |
|             | 172.789150115627 | 1850.06063216244 | 1413.36279821142 | 2191.09005731751 |
| PALM        | 82.8205269728224 | 63.5519501251416 | 75.2391243965793 | 48.0382231302334 |
|             | 162.758841068655 | 220.743173420176 | 40.2154497375715 | 118.186590679218 |
|             | 50.069494231021  | 110.272925554245 | 113.051477801522 | 131.126942328593 |
| PALM2       | 44.1294459089314 | 37.4181006952079 | 37.4642807402741 | 36.9376982271148 |
|             | 41.5377280911418 | 36.3845892764084 | 36.3194282084339 | 41.0844534776541 |
|             | 35.9645119596869 | 37.4302011516587 | 38.1835938174625 | 38.3834435509221 |
| PALM2-AKAP2 | 43.3098985178373 | 40.4772513262052 | 43.4709415392696 |                  |
|             | 46.9919960628953 | 40.0145811166794 | 41.2098211956301 | 40.7376840028647 |
|             | 46.9454141780379 | 42.0126083977597 | 40.6022003765153 | 41.9908237694988 |
|             | 42.7275315121163 |                  |                  |                  |
| PALMD       | 41.6354649482853 | 45.8669209716694 | 40.301483914446  | 39.9697332660833 |
|             | 40.2449343247539 | 47.3791873993182 | 39.1539892144371 | 41.6466169548846 |
|             | 40.6957787921451 | 39.4710743516517 | 45.390192977585  | 41.3481355128089 |
| PAM         | 1211.8832855325  | 518.936896882424 | 867.856842601788 | 737.604036996153 |
|             | 550.751923603828 | 2122.39240932934 | 235.047133588022 | 535.313561995599 |
|             | 776.670493028756 | 1473.52943897204 | 1330.19215036764 | 836.472724085903 |
| PAN2        | 86.3054012048636 | 100.483113678344 | 167.578081645481 | 105.790224260281 |
|             | 92.8644908993284 | 93.3718038663074 | 101.716697533604 | 127.797511870397 |
|             | 111.845105854608 | 204.862161704394 | 158.769954040462 | 193.262615637464 |

|        |                  |                  |                  |                  |
|--------|------------------|------------------|------------------|------------------|
| PAN3   | 142.748812565309 | 168.503424269691 | 194.666769955149 | 201.208357379329 |
|        | 156.433762355183 | 146.133951379664 | 150.374739898477 | 179.07886477603  |
|        | 178.688550924272 | 220.217797955745 | 235.33716196909  | 240.265816943765 |
| PANK1  | 57.8405769800773 | 68.6804583979297 | 61.8924196882984 | 48.5937315750434 |
|        | 69.9214859673839 | 51.294537308199  | 91.1707965298745 | 68.5370732645926 |
|        | 67.9176876913772 | 73.0855167819246 | 60.0765286625112 | 66.1334450017707 |
| PANK2  | 162.486448421519 | 200.744181967601 | 155.225701588645 | 172.676819138152 |
|        | 179.433109488671 | 119.965950077259 | 243.06561740595  | 151.815294281745 |
|        | 110.729504563799 | 136.530734456168 | 134.19834305339  | 179.09303345382  |
| PANK3  | 56.2508140932179 | 40.8880530359822 | 50.8303921211581 | 50.0526763693329 |
|        | 52.8190882379316 | 43.3785777889265 | 52.4111687156893 | 54.8412943008635 |
|        | 73.7873098190297 | 47.2299678280724 | 51.1483696410762 | 46.917149434588  |
| PANK4  | 84.511841810844  | 99.4123924179498 | 79.4998723172096 | 88.9113618165337 |
|        | 120.618530729822 | 83.955786676926  | 93.5928272702304 | 74.0831311663524 |
|        | 88.5564369981649 | 87.3815040456105 | 84.0305689846475 | 87.2175634803271 |
| PANX1  | 86.5564881117807 | 73.5534417023453 | 73.7495118153367 | 87.4850071876743 |
|        | 74.2283328056604 | 87.3429006429216 | 71.6890300780549 | 112.328675926999 |
|        | 83.757054871222  | 54.6089451252049 | 62.6885730386156 | 65.6213260281822 |
| PANX2  | 51.2851682978581 | 124.002268940785 | 58.2986825661503 | 82.5279746006378 |
|        | 127.232160404726 | 54.5952754712007 | 144.227861902786 | 511.261925898948 |
|        | 91.9291200887492 | 76.3583555666815 | 67.2575005672188 | 81.0169370911764 |
| PANX3  | 39.0620487644635 | 46.0713306971594 | 47.7737810047679 | 35.0448343468967 |
|        | 42.4864576619427 | 50.2163892855092 | 40.6750540874299 | 48.4670130605028 |
|        | 44.1519466943185 | 47.1001757441025 | 46.3370338074996 | 42.357910063876  |
| PAOX   | 55.9249770393176 | 75.8976034525022 | 68.5689807788431 | 90.696780047049  |
|        | 58.7460488758053 | 71.2370255410834 | 198.103081445734 | 105.870682345663 |
|        | 67.403136471929  | 80.9907498621309 | 81.3895045947915 | 62.6270592859102 |
| PAP2D  | 40.0557788909923 | 37.4181006952079 | 39.4710743516517 | 40.4359177791566 |
|        | 41.3755760434934 | 37.2686490268265 | 40.968974769473  | 36.8982253308785 |
|        | 37.2810767789306 | 46.8954576545929 | 53.1278271804774 | 43.4290452504928 |
| PAPD1  | 159.071016200059 | 182.06733830953  | 152.467040827584 | 154.287396750021 |
|        | 270.036719921343 | 159.554916039519 | 231.333080775773 | 167.352766082239 |
|        | 219.527698657901 | 111.607814098243 | 175.099998331811 | 192.356440003154 |
| PAPD4  | 156.754606475323 | 230.197573134703 | 222.16475904496  | 261.6201598868   |
|        | 178.624349589089 | 192.171116215791 | 128.024853362102 | 131.068763088422 |
|        | 160.605530211736 | 143.962643695789 | 155.617122020913 | 224.60637398191  |
| PAPD5  | 64.4415447415281 | 82.7351935657355 | 108.196445499586 | 135.323750661937 |
|        | 59.8102324370568 | 101.46584765758  | 85.9692990407066 | 82.6246523811721 |
|        | 69.4009439491061 | 91.9185612536409 | 123.768417863139 | 96.0539709962851 |
| PAPLN  | 50.0466349801009 | 43.5182502375207 | 92.8951148347802 | 71.3932787152381 |
|        | 41.5668884168669 | 47.3791873993182 | 44.0687697278114 | 57.1362071277099 |
|        | 46.9739160257217 | 38.4187686307607 | 42.7275315121163 | 43.2776458914333 |
| PAPOLA | 379.280296622892 | 286.340091833711 | 371.042302128933 |                  |
|        | 536.013150313097 | 340.429325650126 | 363.002913525646 | 392.709496239795 |
|        | 596.84269596976  | 578.311131274653 | 638.305455110267 | 466.454993547103 |
|        | 527.439095170064 |                  |                  |                  |
| PAPOLB | 36.1232327599945 | 38.6414316877471 | 38.2280071951674 |                  |
|        | 40.9607305725196 | 41.3755760434934 | 44.1737502492846 | 36.08956004634   |
|        | 37.33030683349   | 40.9901805728485 | 39.4710743516517 | 41.9083581529276 |
|        | 41.3481355128089 |                  |                  |                  |
| PAPOLG | 54.931538325692  | 48.3699741879723 | 52.0742951366864 |                  |
|        | 48.309866878365  | 50.2163892855092 | 48.3686935595826 | 37.2892641289258 |
|        | 45.7476095696859 | 41.5635499110307 | 41.9666541498638 | 49.0361180089431 |
|        | 49.2064066614865 |                  |                  |                  |

PAPPA 42.2455707947223 62.1642339365777 57.6371756925687 103.961956810572  
152.078104394345 54.3478800757394 50.8388984085636 98.8478655411492  
46.2027193115397 53.1993028936883 96.0126406688619 72.9580216367379  
PAPPA2 42.5193208629123 38.7578265341627 41.437237454134  
38.1421709520616 44.9384441371181 39.7394181011603 37.5469247328848  
43.0390857698452 42.2248608921879 43.6670755115848 37.2559756339764  
42.2577689927563  
PAPSS1 145.791398829369 215.131274710043 195.482216656634  
283.643027929014 105.589475270494 128.024853362102 124.362644216178  
98.5097700382506 117.921615219634 123.387418707738 123.27141431776  
150.011814577972  
PAPSS2 147.285007921741 80.3676231413295 71.4473248804357  
305.119894105297 86.6854406823303 162.151812425949 63.7721358300879  
82.3364971911816 47.5564423692142 68.1674425673171 65.088713927995  
100.188736523729  
PAQR3 57.2008272301399 91.1741538903522 113.18951586976 63.4531374125233  
106.009130381007 94.6167194649276 83.0647477737971 86.915098846441  
97.2425832658887 74.4696354388511 69.036463612998 80.3500323413132  
PAQR4 219.527698657901 184.218705402964 156.08027400493 147.033637977077  
128.981582396627 68.6424653037264 217.533011278692 128.827672077002  
194.985223342082 52.2256177934134 68.0414563597154 64.4156641487994  
PAQR5 43.0462952354436 45.5587966941116 44.4652605017595 43.1275490164761  
44.4031868028216 52.2089306840125 46.5650556481721 55.421880601441  
41.3468610075772 48.3693338695392 56.1822680431676 48.8670821164567  
PAQR6 77.6870769927325 52.3432130135266 49.5923712603197 39.7742005651286  
47.6884372645373 40.4639532172338 47.0775611502299 49.9332280449549  
49.1343297140926 39.8873706855774 45.7873395324682 46.917149434588  
PAQR7 223.1171195512 150.801729138762 120.123385036416 69.5544840164738  
112.311249826645 74.0995052892511 285.689076149891 477.558242266308  
182.836805462079 436.216696884703 534.292112344761 427.972184856393  
PAQR8 65.0721641331632 127.596368103014 162.908986027874 88.6717761948382  
59.5844022026141 89.3168921945222 204.490115029568 110.983311402531  
95.5920087912438 794.806085783439 485.698327133705 187.462631817772  
PAQR9 44.5282181324797 44.3529919625344 43.7630587657205 44.4367387274922  
38.9496515344837 42.157627240486 45.7452456977857 38.8495095797881  
47.27543600687 49.3000844711116 42.5426057453993 46.6397391251762  
PARC 62.0553450433433 70.1831787109201 77.5718089378881 52.3004056941891  
55.1563703466328 59.4949177415847 50.8388984085636 52.5098795466615  
59.2566572428546 79.1074681877535 81.3454589502043 73.845912534353  
PARD3 40.3478825593224 42.5269793679335 43.0971787292711 41.0726336841311  
47.4548471240051 40.6507422261428 37.9430145836712 50.3082459161777  
50.7619345314571 41.8613406887824 44.2925355984056 44.0451487108213  
PARD3B 42.5193208629123 40.2493681589104 40.8420925848403  
45.5869891570251 44.6834648302383 41.159706131351 41.3094485574845  
43.1567024035183 38.6510172759977 41.7932258301997 41.5421429082231  
39.8497227447888  
PARD6A 62.6702927225656 55.4767271127157 56.939860285007  
47.6687908290818 66.6894494536346 61.1751736985663 81.0331497830643  
73.362936710475 52.2216613535546 48.665578118898 45.8180710486329  
51.7495306734657  
PARD6B 38.6454098044474 43.4396866157171 38.9790184198145  
47.0874209746031 46.0043807840705 41.2567470068038 55.9276266345493  
40.6171774724171 41.1742244762318 40.6022003765153 39.4410515050885  
42.357910063876

PARD6G 46.7660461027265 104.587564056763 87.036020750455  
 43.6033221838149 61.9058671030777 54.1859679451613 70.1597323687098  
 46.6456668510218 113.30970148672 77.554620469891 83.946822476147  
 75.1328739717464  
 PARG 48.1952521496489 51.7495306734657 54.0170817319522 39.9084621723809  
 49.1263312877155 43.7630587657205 48.9826868640753 37.9837233601316  
 51.3511088648386 43.4544762830742 45.1432412071268 44.2527566343661  
 PARK2 42.9641759692926 39.2542963855807 44.2405728317107 42.4580504587581  
 39.3667161654772 47.5216423686268 39.8299340037009 41.2098211956301  
 47.0804681460898 42.2614524730856 38.745552403895 47.5540235065658  
 PARK7 1059.63540694644 863.082385199922 908.328776521114 899.223276238109  
 1104.45371981807 1103.90449800536 957.682898193927 1190.10462185567  
 1040.102982885 795.381998233245 971.856840043688 1335.4111951034  
 PARL 507.375704144286 317.186419919708 384.280434953152 343.382663050351  
 433.637087338002 563.573152902421 581.396808977873 573.394745674984  
 500.549865625701 614.603743904512 588.972273484465 485.310097523194  
 PARN 144.17470770145 114.161435210562 177.958475301951 123.608921653229  
 113.444217634165 136.711122812062 135.012695962236 202.192457390868  
 152.605418131968 203.353724675525 166.304210248623 144.562563943103  
 PARP1 489.232537791775 765.145138238955 839.850453078119 430.450581874766  
 1202.11455437028 727.181489302632 1173.47285626656 1023.81381775221  
 918.083610591772 667.837116137964 674.674666457804 551.1195044975  
 PARP10 92.8026641003757 172.801059111314 98.8595497262968  
 88.8330881965986 86.9816932158186 58.1242391848692 75.656434170689  
 93.9880852748373 87.5484709201852 76.1991031349451 94.739351091808  
 62.7248529539226  
 PARP11 69.8712342353417 47.087835967892 50.2869791217819  
 51.5913529948887 52.0583273941813 47.0940613507321 51.7714254834195  
 51.0724630072723 61.8824218975538 64.9959712888709 64.3824529624475  
 50.8442982601142  
 PARP12 216.063990451376 234.408769393378 190.403032965372  
 261.421333472097 108.607805039005 123.674164545425 211.868223638158  
 187.711309781257 281.906398109158 247.843927763772 242.751164798133  
 135.92805172353  
 PARP14 124.37984507038 123.597489107285 134.068233310299  
 128.38299874379 62.588825192561 80.3805507705979 96.1825551158198  
 128.635811501506 93.3418050966934 98.7331384143685 96.0126406688619  
 110.009834478125  
 PARP15 40.8681871019812 37.3634897565502 38.1421709520616  
 42.2496337895968 37.3508690072156 31.5556621809114 36.5352572191451  
 36.2539950294089 37.6383530120621 39.0648733099061 32.5482839399637  
 31.7413650507468  
 PARP16 80.9663216993544 67.0402749076279 68.0649030501515  
 60.4646208319121 82.3181867658154 73.2751502965172 74.7534423194688  
 81.8491450876942 86.8463723709337 115.98265270452 95.39134217438  
 90.0942781313264  
 PARP2 121.562769658314 78.5561367357764 84.2385359528743 74.3523005665671  
 111.2132295348 86.8691342571214 70.0196904419961 83.1702007661831  
 102.063594231253 90.4160198134865 82.5225075943931 75.7991766454243  
 PARP3 103.75895351937 242.080992016235 248.058310353348 104.754762973117  
 235.420582508332 131.766252431636 104.232196493024 80.4577725550904  
 181.586195566181 212.622278823808 224.665128374218 230.649032296928



|       |                  |                  |                  |                  |
|-------|------------------|------------------|------------------|------------------|
| PARP4 | 403.664724682094 | 909.843512894628 | 725.680256063016 | 484.050852319927 |
|       | 535.585999498708 | 432.355300448283 | 880.992328229414 | 375.095491465679 |
|       | 557.979646421047 | 976.566026758227 | 700.010354583503 | 962.079396754147 |
| PARP6 | 65.5996869277644 | 56.8875898013449 | 54.1892600262225 | 56.9299697426319 |
|       | 72.8767495122541 | 69.3497375926383 | 61.7543300388739 | 57.4966000742671 |
|       | 60.920620198708  | 66.6894494536346 | 64.0541263553251 | 60.7741670229412 |
| PARP8 | 83.5228323483109 | 50.3890372242269 | 59.501103909345  | 65.6502223413705 |
|       | 62.8753829543444 | 68.7952490738858 | 45.3597029614942 | 53.2046867327331 |
|       | 55.0748878261048 | 58.0655276913048 | 67.9211943239881 | 54.9071823326024 |
| PARP9 | 182.204124363356 | 166.399121350223 | 187.862483922786 | 239.924746743429 |
|       | 90.2652818919579 | 146.483908799607 | 111.277752650408 | 157.082769443568 |
|       | 133.842824493862 | 94.7110944331075 | 104.241389167544 | 106.752660061588 |
| PARS2 | 38.5648843914189 | 40.6380495994768 | 44.2405728317107 | 44.0451487108213 |
|       | 44.4489662507893 | 42.9695585740813 | 46.5650556481721 | 43.7396619462033 |
|       | 47.7086093893038 | 45.9004543328976 | 42.911855821602  | 44.6484005362281 |
| PART1 | 37.8386378737561 | 46.9919960628953 | 42.640829914102  | 42.1273928203021 |
|       | 39.7568367479301 | 55.0009147092272 | 29.745266251498  | 37.0390589468421 |
|       | 47.7086093893038 | 55.5206840401643 | 48.6767028205398 | 43.7672102682067 |
| PARVA | 100.403196213407 | 77.775644509079  | 63.7744603935682 | 78.1583955490018 |
|       | 74.2283328056604 | 137.424708183613 | 77.0003455479124 | 72.5835488194631 |
|       | 62.1796792097014 | 141.386644354989 | 103.276116332402 | 139.945446129591 |
| PARVB | 64.546412747238  | 64.4552309967362 | 52.2832912331043 | 137.239944506217 |
|       | 55.094385444315  | 87.1397220361868 | 58.7585623394335 | 80.0502531022254 |
|       | 46.2773171659372 | 61.227809931332  | 58.7065473526185 | 68.8138639355609 |
| PARVG | 110.729504563799 | 116.51037006692  | 111.735319884512 | 621.489785652602 |
|       | 73.3533274030352 | 120.618530729822 | 95.2218627805387 | 116.67447696188  |
|       | 49.7336769474446 | 68.0556717366572 | 83.1874704625702 | 58.112348043634  |
| PASD1 | 39.8662795144616 | 42.0709558258414 | 42.3536549114165 | 43.3078542962968 |
|       | 38.4540849632254 | 42.4580504587581 | 44.7255207589606 | 40.047314525032  |
|       | 37.2810767789306 | 41.8613406887824 | 40.1742127891824 | 38.3291713594599 |
| PASK  | 85.0753342967819 | 90.6269311015532 | 74.6901522573522 | 83.5895816521251 |
|       | 54.8690480892602 | 43.7078399718247 | 66.6894494536346 | 85.417321091835  |
|       | 67.8688083153991 | 50.3388505346542 | 54.0865464112237 | 57.8111054584154 |
| PATE  | 49.540449125788  | 41.0678614026819 | 45.989212296035  | 47.481302504066  |
|       | 46.9906120932727 | 41.4508241771315 | 41.9393838138203 | 38.956280281655  |
|       | 43.4656637536244 | 50.3388505346542 | 38.6662194645633 | 47.7962548556026 |
| PATL1 | 280.490447179545 | 280.275836993258 | 505.650842529816 | 353.463970335835 |
|       | 451.603052501528 | 231.893992191022 | 719.815240381415 | 331.001195453225 |
|       | 427.540236966999 | 325.990132666873 | 255.324974349269 | 327.631923082696 |
| PATZ1 | 44.4669000196164 | 49.5443425465542 | 44.4311655729487 | 39.6609238036815 |
|       | 44.3557408297309 | 43.0234331454243 | 51.7714254834195 | 49.0048900199083 |
|       | 48.6849381302304 | 41.3752447964111 | 48.3847843498476 | 44.2527566343661 |
| PAWR  | 123.46775722643  | 132.663052961193 | 100.824660338235 | 73.1447139654971 |
|       | 129.538159906075 | 112.873697337138 | 208.379981648601 | 128.38299874379  |
|       | 205.55797140415  | 77.6056319020116 | 90.9641417408475 | 132.684895918889 |
| PAX1  | 43.6706764143908 | 37.6383530120621 | 47.4740726032707 | 40.9607305725196 |
|       | 40.5710637884029 | 43.4681646416585 | 40.9157352260901 | 45.642304356051  |
|       | 40.5912213523345 | 42.9866214102525 | 39.153226699662  | 45.1735152121056 |
| PAX2  | 40.4139947039718 | 41.8848959280916 | 40.047314525032  | 39.5050383901884 |
|       | 38.7937049365871 | 43.128936937037  | 41.8695090436685 | 44.081163104701  |
|       | 40.1751033251565 | 41.8613406887824 | 42.0507048990507 | 40.7704587752083 |
| PAX3  | 39.4710743516517 | 38.0226905622357 | 40.1467909696443 | 34.982641408618  |
|       | 38.9496515344837 | 39.3646017783075 | 39.7264117629268 | 38.8159908342801 |
|       | 40.137818555383  | 36.5219488315447 | 37.3404647796601 | 36.0286175582624 |

|        |                  |                  |                  |                  |
|--------|------------------|------------------|------------------|------------------|
| PAX4   | 43.0930293831497 | 42.8542642792862 | 29.4322896559759 | 42.2496337895968 |
|        | 37.3508690072156 | 37.4782441311626 | 48.6395795163502 | 42.2577689927563 |
|        | 45.1899271235974 | 47.7180816682562 | 44.2142581488029 | 44.5432192783161 |
| PAX5   | 32.0823591288671 | 31.498275130159  | 39.2707964550441 | 41.7614975630362 |
|        | 33.4316681623175 | 37.7000400506818 | 37.0564573649223 | 35.5798430594271 |
|        | 35.4332080966594 | 37.4302011516587 | 35.9563099719284 | 35.9604262434141 |
| PAX6   | 39.0620487644635 | 39.5573415356949 | 41.1742244762318 | 38.5252456306656 |
|        | 38.514058966346  | 38.385865183581  | 45.0283997415478 | 42.0847226073592 |
|        | 55.4030910454028 | 40.9558083259517 | 35.5179217192467 | 33.8196020406676 |
| PAX7   | 110.362432903746 | 106.521012342668 | 127.265200736376 | 156.69976952483  |
|        | 126.360723656793 | 146.372411304933 | 109.726577835621 | 150.405742308999 |
|        | 117.732966326465 | 135.323750661937 | 116.388069891158 | 146.287473652123 |
| PAX8   | 46.572043843509  | 49.6841415268611 | 40.7620472083159 | 43.3554905202712 |
|        | 39.3100256336821 | 40.800866389165  | 41.0381860307445 | 45.6948619492056 |
|        | 42.7606905460304 | 41.7405682794166 | 44.1148826235374 | 42.1537476443423 |
| PAX9   | 45.4799270968969 | 53.565717255469  | 42.3536549114165 | 56.7927450229377 |
|        | 46.4343327861696 | 39.6251842352088 | 45.223075311113  | 44.4031868028216 |
|        | 55.6617952786921 | 39.5637454855233 | 37.4642807402741 | 42.7782216342806 |
| PAXIP1 | 168.78407943637  | 190.977045076469 | 204.009492151839 |                  |
|        | 101.403739410832 | 234.585571442269 | 150.009352890706 | 203.127486721124 |
|        | 134.537040608687 | 216.194306146777 | 142.251426773121 | 159.667153030627 |
|        | 116.295564219236 |                  |                  |                  |
| PBEF1  | 44.5282181324797 | 41.159706131351  | 39.2707964550441 | 44.1483976313959 |
|        | 45.9104478407175 | 49.5424425850549 | 53.4921736109774 | 46.1673159982664 |
|        | 49.7336769474446 | 44.7958122466628 | 45.8180710486329 | 43.5738557773903 |
| PBK    | 60.8357760968871 | 64.643220133046  | 64.8254097948745 | 40.8681871019812 |
|        | 59.6922302604696 | 44.1737502492846 | 117.260454792593 | 55.3122077514658 |
|        | 88.0877175295544 | 46.0119912782855 | 39.2542963855807 | 39.3575468494941 |
| PBLD   | 41.6691352099881 | 46.8954576545929 | 50.6004078448405 | 41.483412492426  |
|        | 45.063792968927  | 49.6968306293074 | 45.1017494688414 | 46.695848687694  |
|        | 51.485516160404  | 41.4659679379482 | 44.5818127765109 | 47.0874209746031 |
| PBOV1  | 43.7920955808549 | 41.1212129940704 | 46.0727230219512 | 44.0451487108213 |
|        | 43.1847628331565 | 40.7616966228404 | 47.8164193292842 | 43.1931731665131 |
|        | 39.6609238036815 | 40.5090849993014 | 42.046575509735  | 41.2905987859365 |
| PBRM1  | 50.6774883370457 | 61.9036392303558 | 57.0875538213735 | 59.1771672022928 |
|        | 68.2215392821251 | 57.9679239164609 | 68.0157730844432 | 66.2443103843603 |
|        | 57.7865070833351 | 60.1837189855762 | 59.7629007954215 | 59.987045425047  |
| PBX1   | 65.1424206085551 | 72.6162848018047 | 83.8679756709676 | 45.7397504535169 |
|        | 93.9708162269401 | 105.525194437454 | 64.5722284870633 | 65.4714272652857 |
|        | 88.5564369981649 | 125.835967514239 | 122.791460208787 | 95.491982090349  |
| PBX2   | 89.3989848564067 | 86.0630164348952 | 95.6182216943758 | 88.6717761948382 |
|        | 127.60426512782  | 107.538934056558 | 74.416117986276  | 57.8765910878975 |
|        | 85.3086977427271 | 116.311176407088 | 90.6191520659197 | 124.18058128276  |
| PBX3   | 374.978401470437 | 263.636675573982 | 277.12373983597  | 390.331295238889 |
|        | 109.758297200083 | 681.850915393461 | 274.398580571984 | 277.731146253511 |
|        | 154.370850473737 | 448.196293409768 | 330.737070535671 | 377.847116683974 |
| PBX4   | 47.0940613507321 | 72.4325984501758 | 94.7718338968252 | 100.483113678344 |
|        | 113.612874206329 | 44.8872784170036 | 77.0003455479124 | 229.992809034971 |
|        | 72.0655217037557 | 118.115557136662 | 140.698550434486 | 73.6512983066046 |
| PBXIP1 | 73.5534417023453 | 55.6972661824064 | 60.6567691532561 |                  |
|        | 63.4531374125233 | 60.0736861987141 | 69.2685201884906 | 56.2181240696479 |
|        | 78.3542840447759 | 60.0736861987141 | 119.493400362694 | 81.9727730469029 |
|        | 60.7495043977707 |                  |                  |                  |

PC 57.5507765660772 53.3683962805281 50.2183740053962 64.2551943403496  
79.9597944271831 49.9699131196797 75.9236575152151 52.4396589505396  
64.1675023456571 55.9715651431881 55.1804535845496 51.3590013627505  
PC-3 41.7397731376692 48.2220547806679 45.3974838013476 44.6905691366696  
45.4751076037511 44.1737502492846 44.6032218589199 43.9366081640576  
43.7630587657205 43.401782064778 43.0016969050339 45.3763275588341  
PCAF 38.8561375693335 41.7337506166619 43.0971787292711 48.665578118898  
47.9128504683618 43.4681646416585 37.2892641289258 44.0390019242862  
38.9006788676407 42.2614524730856 38.3684202018524 41.3481355128089  
PCBD1 226.580055691897 333.731080636948 355.351648424266 127.093495914275  
250.276530863694 231.361506886859 349.767857026458 191.6998930948  
621.012072500314 240.6614822416 241.599353653369 410.402285012885  
PCBD2 57.6913861717513 56.5319193881205 69.11736279512 50.7046706880325  
56.8307116636372 77.0226403968683 41.8315602975157 50.3082459161777  
60.8635925649592 87.6598268114592 76.331185787832 63.3578893149245  
PCBP1 1917.90025587049 1416.47763911039 1511.33844030783 1845.34855798442  
1426.87261062373 2036.72286752819 1320.7894611262 1364.06060391538  
1159.77262479002 1106.57048989685 1347.15664445545 1649.78627644882  
PCBP2 1693.5377672895 1448.17151189672 1266.41536472956 1601.52194699063  
939.453799186397 1519.01001038342 1287.41527826233 3055.1209535841  
2465.65854657837 2178.59848996529 1776.78784112613 1638.16317738035  
PCBP3 56.3471340054074 39.9697332660833 38.8775560911841 52.8502823653368  
38.0598374201407 41.554942319225 40.7910160811527 49.3880946790306  
40.4220196471124 44.7958122466628 43.0016969050339 42.0424641526302  
PCBP4 72.4094549259929 83.5742879296932 70.2354761751695 61.4675784678918  
90.1569547216202 69.8397773950218 75.2431285480772 64.4588422949237  
79.2525964926483 78.5141640924736 69.9872801240574 67.1209520838357  
PCCA 120.630151942485 98.1701560122734 174.492066109537 81.6780581904253  
131.365512154718 160.336517310154 145.526972410673 89.9227845135785  
121.270627995568 112.760972238512 164.511418506192 262.9072085191  
PCCB 347.486523804413 441.5479786095 528.840700144811 289.975375372371  
489.42739398838 339.418989022736 476.421959423835 307.754078087321  
943.73554571528 217.425223098994 294.155188719236 374.978401470437  
PCDH1 48.6621527194963 44.0409178714232 49.1067959632109 40.3691324547049  
47.1635381911975 43.2312848495114 46.2448677480802 44.5658219748173  
56.9621724830201 45.2949878966345 44.7926323492519 46.1592873342534  
PCDH10 35.6111578834671 40.4359177791566 39.2427704677707  
38.2041059863839 41.5421429082231 42.8598805316863 40.9784333688086  
39.9576138799997 39.3435164409386 37.5672792721124 43.6960408897486  
41.809704036355  
PCDH11X 44.4528975599297 41.3155579881328 41.1697539052486  
44.1483976313959 40.9950639693255 44.3648993568405 42.5564081946232  
40.474177462076 44.0133005633981 42.8524400242291 43.0782257865587  
41.5173370741598  
PCDH11Y 36.1779002669807 37.4166901019774 35.8839587073028  
40.2559395174155 36.8059561571675 38.8603695827799 41.4742337714895  
37.9837233601316 37.0478905185041 38.1472552468971 36.37843721345  
37.6557714476853  
PCDH12 41.1523487516364 44.2105195734073 42.640829914102  
33.0463640202858 38.9496515344837 46.8954576545929 40.6750540874299  
38.4540849632254 41.1742244762318 42.1622837416589 37.6484782516569  
36.3454320848591  
PCDH15 39.9697332660833 38.5252456306656 38.6727842796202  
36.7892997857376 37.7576900881741 40.7616966228404 39.0458123429605

38.079222289614 36.197424053556 38.957687788868 37.2892641289258  
40.5703581862752  
PCDH17 86.9816932158186 105.204861495017 140.853812988562  
245.194730981772 86.8871118411414 81.5782824513693 46.0228732507872  
213.285274542564 43.4656637536244 63.6197695952215 93.310557793228  
54.4992295592001  
PCDH18 127.50316411791 123.918925337643 66.6332042895961  
96.6957892186886 160.868571611805 325.909358171616 51.6784647420677  
96.1514672581462 57.6336931026499 197.73829635261 133.244526666651  
122.576931376426  
PCDH19 54.0170817319522 70.0470864733496 41.6079958749402  
45.5869891570251 43.9450023643394 99.1667512831715 63.3924515518667  
67.8061298261394 48.1174861108648 72.6549171886783 49.6706535876636  
56.4578213622965  
PCDH20 36.7356360093603 36.0366673493555 37.8386378737561  
33.4240466670776 41.2740822675592 50.7516773099639 42.9803717121865  
37.6557714476853 36.6312676076142 43.844855336215 43.6629145624937  
43.7672102682067  
PCDH21 31.4517139158876 46.4861258030402 40.0998167098057  
44.7980740332174 30.422292833952 40.650742261428 37.0564573649223  
36.9355798143571 38.5252456306656 42.1622837416589 40.547835538778  
40.9683275553869  
PCDH24 41.2424637338424 43.9421822132391 48.3847843498476  
40.3180310664156 43.9450023643394 52.0299937917925 47.2927436772465  
47.5950227477807 56.432280646473 45.9004543328976 46.4205654140754  
50.7487159427973  
PCDH7 64.0759817636265 45.9042435014755 49.5172323138783 44.9928555006158  
46.8108163751035 80.882176929636 47.8947595316832 48.692302914163  
41.4397539024976 67.1278109419819 62.5528124447176 57.752606600685  
PCDH8 37.7805366040928 37.920964499903 36.7172300749476 37.4642807402741  
40.4639532172338 38.6414316877471 39.0759686770589 36.5933320803035  
43.423558862426 38.9207612933107 39.0061493066838 41.7072675309997  
PCDH9 44.5732978059923 39.0564222526273 37.3343752738679 41.8190986513051  
41.9322044100235 44.2335949843431 41.4397539024976 40.2906799807722  
37.8565969651679 38.1569957197319 41.9908237694988 39.1011392200677  
PCDHA1 41.8409927585705 41.1090481599939 41.8389336728199  
42.9969462198633 42.3557830754336 40.6959906307191 39.9361851865743  
42.4926864381766 41.5635499110307 43.6033221838149 40.1362682639916  
43.7347995410801  
PCDHA10 41.2773842727759 36.4564050256915 38.8417151851134  
35.5395819665562 37.8679241954337 37.9951997351435 42.357910063876  
38.5086872173449 42.1089765085639 35.5833299694641 40.3180310664156  
37.5556299264699  
PCDHA11 40.4639532172338 44.5152708955623 41.6079958749402  
40.646702696033 45.8051846088552 42.5660695551615 43.9450023643394  
47.2009420656854 46.9739160257217 43.1839109702714 42.2618615571566  
43.9541718254769  
PCDHA12 41.0043775553254 41.0678614026819 37.7000400506818  
44.4954892619459 42.1386542162789 44.8872784170036 40.2601451506332  
40.6663433492193 39.0458123429605 40.6533975461148 40.9683275553869  
42.1860813954352  
PCDHA13 37.8386378737561 37.6383530120621 39.4250105372135  
42.9358255168086 40.2449343247539 39.6833800000587 40.6216891610774

36.9355798143571 42.7671420440641 39.3698811593364 47.6125796208753  
37.8129870676592  
PCDHA2 38.7537364570873 44.5884811528117 44.7829632472754  
44.0451487108213 40.0145811166794 41.3094485574845 46.7100796279384  
43.0930293831497 45.0017158586743 41.2598458726002 41.9083581529276  
46.201352759435  
PCDHA3 41.7877325563821 40.7952353240579 39.7411455670172  
42.4147793282701 38.7937049365871 42.2857372794461 37.6455751461448  
39.0209841108908 42.0621425894624 40.0599807618105 39.7631425193874  
41.9721968713295  
PCDHA4 51.8781065691038 43.5873188565519 46.7508829977587  
50.0526763693329 42.7982502551634 42.0574848021044 47.1345949868029  
48.0582855095143 47.27543600687 46.325232414659 41.0050831223107  
48.0350549043063  
PCDHA5 51.9545473262296 42.9358255168086 41.9666541498638  
40.5484717678957 43.6587492470348 53.6858208094027 46.4388841354122  
58.8022152133979 48.1174861108648 53.0357938671646 55.3942006156899  
54.1941919612524  
PCDHA6 45.2875173643252 43.3972849968032 43.3465699185405  
39.2336402665402 39.9088079891223 46.6872654833579 40.0052661202207  
41.6466169548846 45.7452456977857 41.3641352453779 40.4094901248527  
39.7844133452634  
PCDHA7 43.2239171482126 41.4312041000995 42.2857372794461  
38.3684202018524 41.2397693523949 41.0582900711341 42.0605906240248  
41.599960574499 44.8003345643334 41.4606714407332 38.932557955217  
40.6614700944853  
PCDHA8 38.5007204246293 45.8669209716694 42.0621425894624  
45.5869891570251 39.3667161654772 39.8455060654531 36.7356360093603  
42.7431359850339 43.7630587657205 40.1179210534118 44.2925355984056  
38.8495095797881  
PCDHA9 59.2903915056319 42.3138951003676 41.5536168238478  
40.0337926471478 38.2125616761557 42.2857372794461 40.8696824893009  
52.9813204449021 45.5779686360641 43.3523899508716 40.2330489360997  
39.3737104145034  
PCDHAC1 46.8954576545929 46.5952288260503 55.8243694410835  
40.3180310664156 39.0564222526273 38.4741160538511 39.700936357233  
38.8159908342801 46.1634822993009 43.128936937037 45.9725715538987  
44.6484005362281  
PCDHAC2 40.4639532172338 40.3384318592985 40.0440633413412  
41.2575219633134 37.0526522140242 39.3565586789274 41.9918605927928  
38.6151680924119 41.6373771565199 42.2614524730856 38.5233040786032  
38.1421709520616  
PCDHB1 38.5648843914189 39.2907645923217 33.9435456570176  
36.3604951341921 37.0526522140242 38.9378717994178 34.0777108441756  
38.2782436497441 34.0382693188794 34.7308008643142 36.0481934423077  
33.939263369489  
PCDHB10 41.0608773166058 41.690833180291 43.4709415392696  
42.357910063876 38.8834538955 44.9370339275041 46.3611042575528  
39.8965727231863 49.4786466722535 39.1177164316495 41.2598458726002  
42.5365257225985  
PCDHB11 39.0620487644635 40.5400384479766 42.0233072093141  
39.5050383901884 43.3896803974186 40.5281496800812 37.6502409810897  
39.1128725343972 41.3803269429468 37.1685072112618 40.8681871019812  
41.1868052124344

PCDHB12 48.9906383294199 46.6996902348633 54.0536858212253  
40.9607305725196 38.5512429290626 51.1621379498014 49.1067959632109  
41.3506832276112 49.2879849674517 44.7958122466628 47.4630625313159  
47.2131144508464

PCDHB13 44.1294459089314 37.1685072112618 50.9933795450314  
44.9370339275041 39.3667161654772 47.4699236780425 43.6753843488695  
38.745552403895 53.4604353973381 40.6022003765153 44.2142581488029  
43.6753843488695

PCDHB14 43.844855336215 45.2556760873335 37.0642268327439  
42.2496337895968 39.0564222526273 52.1024135605001 43.8206425661746  
45.9604707098953 39.3750969348308 56.5379973844443 47.4630625313159  
54.1941919612524

PCDHB15 39.8662795144616 38.6414316877471 34.6977013306396  
36.264823544143 39.0564222526273 39.6251842352088 40.4359177791566  
40.1474543172332 38.1169703906207 39.4710743516517 37.4642807402741  
38.5279745308203

PCDHB16 38.1672336230186 37.3634897565502 41.554942319225  
41.1507980856436 40.7273974755431 40.3357777530419 42.8036731479932  
40.7311497914871 43.0930293831497 41.5435611403119 43.0971787292711  
42.7275315121163

PCDHB17 65.4561038762234 48.2870269886682 69.5937318502259  
42.4580504587581 52.1186591838715 63.7818442618767 81.1284422173774  
45.5842286511645 87.5484709201852 47.9056710878325 52.3761286517985  
52.2299562256681

PCDHB18 46.0023068797812 36.7976562409506 43.0016969050339  
38.2041059863839 43.4544762830742 53.1052228246467 38.7337086062875  
38.079222289614 34.4716904283753 39.2623423164488 42.7275315121163  
41.5536168238478

PCDHB19P 104.832753086298 73.7873098190297 86.500678864429  
104.335120306753 63.3638417360105 60.1042270393382 86.5564881117807  
179.974187861013 62.0967404944031 115.235144612428 161.326580647514  
98.1220820761255

PCDHB2 59.7179445506128 57.2871072823547 101.16781803884  
48.9155368657318 74.1282220615085 53.6562515174849 171.485221601137  
47.7889447429963 95.9075629352341 46.9598474201212 52.4393177875001  
48.8670821164567

PCDHB3 41.6354649482853 42.2900457798748 44.3344900481112  
39.853175885492 39.3667161654772 40.8634043028528 44.1407835440612  
42.3110002461296 41.7233690251839 44.6235437216725 42.9634662926872  
41.863927676552

PCDHB4 68.4352167527791 46.8954576545929 48.3847843498476  
50.378948785456 46.6397391251762 69.5645254789371 60.3928833351886  
41.9315419791594 152.605418131968 48.8623729374733 56.6086202928268  
57.934622029119

PCDHB5 209.524518082089 40.0527893189096 39.0775870687758  
41.8778873678551 66.0411740221276 61.4944752562671 40.9157352260901  
43.5544347011646 43.8482802038826 53.4109882045447 50.1649089793069  
46.5650556481721

PCDHB6 39.9220998751503 40.2493681589104 43.3465699185405  
40.1362682639916 42.9655396732962 40.040778349137 36.08956004634  
39.4322247076926 54.998510746958 46.325232414659 41.0808257270221  
42.57175366709

PCDHB7 37.55264801907 39.6995529770239 40.1985790927248  
34.9221408381038 40.9950639693255 38.2293008890613 39.0458123429605

33.0038344711883 38.3418933808844 42.2614524730856 42.170702295259  
40.0557788909923  
PCDHB8 38.5648843914189 37.10170285405 42.5406888281114  
37.1894304543751 42.1650127805175 44.3648993568405 36.8369172900902  
44.293922970134 41.4636047919453 41.8613406887824 37.7384958256497  
35.1451084093692  
PCDHB9 89.5130163419167 64.9334335382861 75.0377156190383  
86.1703662107384 76.2533853403813 55.3202238943712 96.8490167966217  
173.49425401442 68.9437275251193 140.35042464015 88.9836122218372  
95.1224420992193  
PCDHGA1 38.8376622846758 37.4758832420338 36.4098694708483  
38.8025302527057 40.188873541274 39.6251842352088 37.7668944701279  
38.7023886970298 38.0766847742504 37.267270263961 38.5306320917724  
40.7256433650856  
PCDHGA10 39.8662795144616 40.8476436931481 40.5386195997545  
42.5193208629123 43.9994592139885 41.2567470068038 39.5496902678788  
40.3357777530419 44.5303781239209 43.0177448037924 45.5707650534259  
43.7672102682067  
PCDHGA11 40.096207471219 34.9262464079777 38.6005272730664  
39.2336402665402 38.7004513165111 38.1169703906207 41.9741368971524  
39.0620487644635 41.6340461942423 38.0540928703622 41.9083581529276  
41.0226232127351  
PCDHGA12 51.2851682978581 42.2577689927563 44.4311655729487  
45.4634652319753 38.745552403895 47.2927436772465 44.4639405506967  
36.43924066428 43.6670755115848 45.1569741609597 48.9754340235127  
42.8864415494484  
PCDHGA2 43.4626049853157 41.9894412416874 41.8389336728199  
42.2496337895968 38.6454098044474 38.2293008890613 45.8311458106942  
43.9604529016594 42.38204124321 37.7315666632629 39.2542963855807  
36.2582325396375  
PCDHGA3 40.7609952437622 40.0195349109823 42.157627240486  
43.1131704517186 43.0860383229288 43.128936937037 46.8613212048981  
42.985929467107 42.2331334096358 42.6211340086915 41.8168470823451  
39.7411455670172  
PCDHGA4 40.148780650831 35.7012997405508 36.7089189239937  
35.9956353141463 35.8386839544413 36.6522278218553 38.0598374201407  
34.7569642218174 37.5723609429239 36.7439906400209 35.4729603570946  
33.2715481910159  
PCDHGA5 42.0847226073592 44.1519466943185 41.6977706798234  
44.622459983127 40.6723334103791 41.2040352443154 35.7772039808118  
41.9890955144165 43.331653186429 41.162473449625 45.1846041469628  
48.2220547806679  
PCDHGA6 44.0328992213727 44.4411734611229 41.9666541498638  
43.9282059368202 36.2048942610546 39.4953494583071 42.9803717121865  
47.5950227477807 38.3418933808844 47.611018474151 46.2560238004757  
45.4799270968969  
PCDHGA7 38.9271399577966 38.1811246394237 36.2294700257801  
38.745552403895 37.10170285405 37.5887129572848 38.2280071951674  
37.5511560880902 38.4970433581463 40.848280311228 37.33030683349  
40.5703581862752  
PCDHGA8 34.4896350146096 40.2493681589104 39.1799070031819  
40.0698728584484 33.7494761745342 39.132725377815 41.0381860307445  
42.0494116081998 39.5806465938526 38.957687788868 41.0050831223107  
40.7704587752083

PCDHGA9 40.2087556903277 41.5132248356707 39.6833800000587  
35.9521941716188 40.0599807618105 38.0648056183784 41.9918605927928  
43.3838505886856 35.6139301508335 43.2988017098387 39.2542963855807  
38.3715200542609

PCDHGB1 49.2595762436995 43.2649781354792 38.9790184198145  
43.074472921841 40.3452320167286 44.9896851005259 44.2166118829877  
49.7309743973184 41.9635525160083 41.9666541498638 38.1835938174625  
40.6614700944853

PCDHGB2 40.3478825593224 43.2649781354792 44.8872784170036  
44.4367387274922 42.269054475455 43.2805590023412 46.7100796279384  
43.0390857698452 40.6957787921451 49.8393069675192 39.3667161654772  
45.0035308952466

PCDHGB3 40.4639532172338 40.3384318592985 41.528370959196  
41.0726336841311 41.3755760434934 37.3799542961839 50.8388984085636  
37.33030683349 41.074824727477 50.3388505346542 42.7275315121163  
42.6758568421347

PCDHGB4 63.5693267269002 45.9266745571724 46.7508829977587  
57.6511495792664 54.1225249245036 47.8636003588181 42.4939802311136  
54.1731035633439 51.7549258776884 61.0935621637178 49.5923712603197  
42.57175366709

PCDHGB5 40.7609952437622 41.4508241771315 40.1985790927248  
40.9607305725196 43.4544762830742 44.2607789091176 37.7136011474903  
46.0633179231318 44.4395580493118 42.4594149893798 41.9908237694988  
48.1627097465883

PCDHGB6 58.0139597055449 52.5380506348717 62.5610562594275  
62.6048727240291 60.5290966885203 66.5774376622485 82.5050369860039  
49.0145368354835 57.4218233943605 55.729415084877 53.8260140375214  
53.655233033193

PCDHGB7 40.0988483617359 40.5852276210998 42.4890076400051  
37.2559756339764 38.2083710281545 40.040778349137 41.4742337714895  
38.5086872173449 38.2874316439311 41.9666541498638 38.8132170743603  
37.925121819624

PCDHGB8P 38.2083710281545 43.9421822132391 38.3166554965434  
43.1847628331565 46.3150221024046 46.6872654833579 42.4939802311136  
39.853866204927 43.5669306063196 45.1569741609597 43.3085358214154  
44.2527566343661

PCDHGC3 41.181169807632 42.8542642792862 41.5562673496867  
44.7255207589606 45.1137938810047 44.2307736942242 41.8695090436685  
41.3962888656479 41.526706795548 41.800198520267 43.1677556681309  
44.4912617551615

PCDHGC4 37.2474303302343 39.3622375852537 39.8299340037009  
36.7186180663551 37.0526522140242 39.4953494583071 38.941855825269  
38.7864161493321 39.9777866059804 41.2276963324981 34.8383995317036  
38.2835812177457

PCDHGC5 41.0970259989281 38.957687788868 41.0356368374708  
40.7481155008596 39.3999056968598 37.7000400506818 41.1507980856436  
42.8482181313226 36.5474283500601 38.8173773425835 38.6335676551747  
36.2809742910335

PCDP1 41.3387790895716 44.3529919625344 42.5406888281114 44.0451487108213  
45.4751076037511 44.0804700754786 54.1707158323527 45.0972184964705  
45.8325181856483 51.2318935933116 39.3667161654772 44.3521099857368

PCF11 113.444217634165 112.375316615894 97.5849495690144 115.468303687641  
67.9032387662129 133.163926420863 99.126949393699 73.4820932957859  
75.0704619826557 135.824520574227 100.057155418659 99.3956523785983



|        |                  |                  |                  |                  |
|--------|------------------|------------------|------------------|------------------|
| PCGF1  | 172.720244584464 | 105.796515736125 | 111.573111498905 | 139.101561420631 |
|        | 123.261654256925 | 117.823678167648 | 128.844013736935 | 146.287473652123 |
|        | 146.551751666276 | 156.456239358718 | 142.515628954457 | 127.239392811099 |
| PCGF2  | 320.504100222566 | 195.968119243879 | 296.271895016431 | 103.139459009593 |
|        | 221.123510823097 | 186.265538054701 | 317.186419919708 | 205.806939441015 |
|        | 321.949943388959 | 193.01447006167  | 208.915145509698 | 205.876395674271 |
| PCGF3  | 47.1962846565261 | 38.1312950900467 | 39.991353369336  | 39.5050383901884 |
|        | 41.3755760434934 | 36.8059561571675 | 43.0930293831497 | 40.831207953647  |
|        | 39.7537274655115 | 37.8217989841918 | 45.8180710486329 | 47.3992733452821 |
| PCGF5  | 42.8036731479932 | 46.1569135229922 | 53.9612654850046 | 57.4595416719581 |
|        | 39.7568367479301 | 56.8505380943422 | 43.4544762830742 | 42.9301944191913 |
|        | 51.9545473262296 | 48.1392888470269 | 46.972521499515  | 51.138877923954  |
| PCGF6  | 58.1027665533767 | 76.2591822114739 | 65.8455652907556 | 65.813547096222  |
|        | 96.3741876853801 | 83.4033736999037 | 86.9185256838836 | 57.1362071277099 |
|        | 73.2364546716324 | 57.9713749600418 | 59.4714233251027 | 70.0697974278875 |
| PCID2  | 637.035929429013 | 559.296669575666 | 653.089523541803 | 452.969595001684 |
|        | 1226.43929953115 | 815.810781070699 | 734.143790759359 | 347.829279462722 |
|        | 581.093069802913 | 555.356799014777 | 559.559234461244 | 629.074729375018 |
| PCIF1  | 79.6581393791238 | 73.2234405348435 | 71.7336217321663 | 68.6379135603075 |
|        | 63.5932443357808 | 72.3523300799007 | 115.314880288079 | 83.5767232665142 |
|        | 78.1448136847078 | 82.743286503787  | 87.8967913380047 | 70.3309641302984 |
| PCK1   | 40.0988483617359 | 40.5400384479766 | 46.4150464549477 | 42.4061338151892 |
|        | 43.0723817756832 | 40.9506062495231 | 39.7576136507593 | 37.1317006162938 |
|        | 41.1349567921107 | 40.9558083259517 | 40.8225507267584 | 34.1509644696334 |
| PCK2   | 94.696942512529  | 211.019451518444 | 180.349984862124 | 163.458716079887 |
|        | 99.2341244350412 | 81.638176606529  | 258.30549459038  | 161.422918681934 |
|        | 219.238235572894 | 93.4494731509092 | 100.057155418659 | 112.830467116678 |
| PCM1   | 222.426799131736 | 185.658246392943 | 229.971492699272 | 280.490447179545 |
|        | 170.932645135423 | 348.328616284658 | 303.670126704469 | 274.02972772427  |
|        | 194.827750623463 | 347.420750861056 | 288.284384035759 | 372.525928228911 |
| PCMT1  | 772.368030410394 | 597.191426276771 | 587.385368995676 | 734.705859548078 |
|        | 671.959673037066 | 897.198663109723 | 693.056793637199 | 628.84789420227  |
|        | 552.480471244789 | 915.102542160713 | 832.181997440212 | 893.185203928127 |
| PCMTD1 | 202.128650032341 | 211.196171061328 | 149.260740603715 |                  |
|        | 183.364949777567 | 134.981483569602 | 304.658728492827 | 139.472956453414 |
|        | 206.989423961124 | 159.973746908596 | 380.278389209918 | 304.298036741211 |
|        | 341.818700750118 |                  |                  |                  |
| PCMTD2 | 167.05554959607  | 249.704644191338 | 260.15500351311  |                  |
|        | 150.336199715245 | 223.316311787046 | 149.769671874782 | 165.311139930529 |
|        | 168.883366756191 | 207.600413958886 | 201.530434441408 | 204.502683458676 |
|        | 170.720099897973 |                  |                  |                  |
| PCNA   | 105.382126899524 | 145.28255999556  | 105.515662220161 | 77.0774476767901 |
|        | 160.100408020768 | 79.8456892021695 | 196.389446842567 | 105.027318695305 |
|        | 151.451107406752 | 56.2508140932179 | 61.1801493883012 | 97.9497090233081 |
| PCNP   | 603.224267841548 | 528.512401493184 | 706.087945508248 | 598.970109654466 |
|        | 495.705224781189 | 1071.64675274806 | 673.522667186915 | 461.83420090894  |
|        | 515.216890329893 | 908.328776521114 | 818.290793784784 | 1077.94530110976 |
| PCNT   | 145.694779669933 | 234.408769393378 | 232.553783060082 | 147.285007921741 |
|        | 354.38923772101  | 162.628603963754 | 238.246319539302 | 194.666769955149 |
|        | 216.45007990575  | 259.626847216881 | 166.821616593685 | 192.509049577236 |
| PCNX   | 288.642294976    | 163.43197105141  | 212.92335057985  | 700.477686061791 |
|        | 204.273912273411 | 193.395549316561 | 148.570371099987 | 205.510539955583 |
|        | 149.397632479523 | 223.801865347687 | 213.768352764473 | 178.661935292895 |

PCNXL2 48.9600850533759 47.2055133646385 53.7792717770978  
43.7311594514862 48.7288537840562 54.6645676410426 55.3141112947345  
59.0716459350153 49.6895940779991 74.7669841575348 62.3233491851723  
55.2998422481855  
PCNXL3 115.691017747672 200.744181967601 198.432987946699  
149.260740603715 183.702709922933 112.873697337138 182.49650467392  
141.942507674009 148.944852825695 119.86041265821 129.810477623628  
101.156215957297  
PCOLCE 675.079525434102 128.503671563486 129.609377870182  
376.453560620912 182.49650467392 597.996273468244 47.2927436772465  
124.051109959228 72.5993974280876 189.035121001539 123.368987753537  
83.9236799134394  
PCOLCE2 59.9232969481163 44.7829632472754 40.4882741869718  
52.1201052574162 136.947616119439 2146.1548633579 88.0664425843955  
64.7318794662958 133.074560812703 1607.73526966988 837.959914510114  
680.837950890159  
PCP2 45.4799270968969 42.3550738181144 54.3554233228353 45.1944222548351  
42.3685136297603 39.3841861812262 38.941855825269 39.3709357615493  
43.5669306063196 43.1839109702714 45.390192977585 43.6753843488695  
PCP4 111.522812019895 43.5182502375207 59.3549213146532 43.1847628331565  
45.3675390992851 4898.89844391477 50.6774883370457 176.963666283432  
34.6720534245631 3202.8848520816 3253.86278287661 4328.723715755  
PCP4L1 87.1735705257803 56.5319193881205 121.45753287862  
34.1051821768421 50.6470461863549 38.4330755397458 36.8369172900902  
42.357910063876 239.924746743429 47.611018474151 61.0094935318105  
73.2234405348435  
PCSK1 40.7022020432945 40.4359177791566 38.0958223740111 55.2214187655851  
39.2839132447749 42.2577689927563 42.4493032770053 42.9887069977696  
40.3316153483289 35.7202909649682 40.2317542073211 42.1537476443423  
PCSK1N 89.7554896946341 40.0527893189096 33.4240466670776  
42.8235313007746 41.2740822675592 43.4681646416585 37.0564573649223  
41.5464765641928 37.3600014814388 40.7063426028871 49.3901004211918  
40.5703581862752  
PCSK2 39.5676051939342 36.89524015739 36.3604951341921 38.745552403895  
43.844855336215 40.1428591998404 35.2163900400329 40.047314525032  
34.9428206949566 43.844855336215 38.956280281655 37.1747156131306  
PCSK4 54.8439819445945 50.3586212130973 48.3847843498476 44.0451487108213  
77.8355333140359 41.4508241771315 43.9450023643394 48.3590401011623  
39.6609238036815 50.5252048155459 48.8744644207821 48.8670821164567  
PCSK5 83.7215159198897 56.9312835667828 53.0630927250439 125.221639689345  
57.4163094213712 150.572774995368 41.4742337714895 102.980622026276  
38.9834959368496 94.7110944331075 94.3537052300317 113.917429432477  
PCSK6 45.8108990837624 41.5170397156976 41.467005949568 40.9607305725196  
43.1892285249551 39.5529690307522 40.9833291293525 41.0381860307445  
41.6616444147804 42.5125542791292 41.0441816173391 40.1700117452801  
PCSK7 274.648263378054 209.931773196136 240.55212989103 190.242383482058  
211.196171061328 124.965915196815 135.169625016001 256.721281849737  
163.66696652324 159.095553026723 172.676819138152 122.914175013196  
PCSK9 41.1523487516364 42.9358255168086 47.0055981216687 41.1886975241176  
47.0954207417646 39.6251842352088 40.5585676679482 41.3506832276112  
49.5539622682049 50.3388505346542 43.3085358214154 35.6427313468066  
PCTK1 40.2087556903277 46.7980335276155 42.0233072093141 39.2336402665402  
49.7526478730976 40.650742261428 43.3262148375525 35.9023742468744  
44.1211971585961 36.2885860224741 41.2267153672559 36.9976231206067

PCTK2 40.4639532172338 34.5023764006976 44.7829632472754 34.5425384901279  
41.8806343997257 41.3553369544097 45.7452456977857 40.831207953647  
43.9450023643394 36.1550293353654 31.7413650507468 39.2469742642337  
PCTK3 53.6741873729867 62.588825192561 89.680151549258 43.8471908014622  
62.7488501311848 46.8278141345019 61.73650350626 53.0430156119027  
63.9110569727542 67.9259304928255 62.5036823572932 62.3102413989199  
PCTP 66.2154717217675 67.6169355376864 61.5080959417997 64.5347406608537  
52.4370718282084 60.9822577063534 65.0031119608637 92.9043863423147  
74.0614295574729 62.6984594468418 65.9273663561152 66.0224755625662  
PCYOX1 149.8814624626 194.924141888391 301.728842562175  
161.092366817598 263.706801812277 277.665554240228 219.64979849407  
309.022069786139 130.716532316693 183.613579501306 225.760096749053  
208.67074469962  
PCYOX1L 40.2543341073001 36.4002279956519 38.2280071951674  
43.1847628331565 38.4540849632254 38.5252456306656 48.3411413510851  
40.931294690669 45.0997987980157 42.5664883002833 47.299647867533  
38.5279745308203  
PCYT1A 46.441301934328 37.6383530120621 38.8775560911841  
45.8844325913247 48.8381507187986 41.2567470068038 37.3799542961839  
45.2806199505029 38.7298222155532 42.3606390470387 42.170702295259  
40.3691324547049  
PCYT1B 36.2496364442264 36.0366673493555 45.063792968927  
39.6292788039793 42.0709558258414 40.1428591998404 36.08956004634  
46.5717043290731 40.2274522635576 36.9102644736882 39.2542963855807  
38.0452862258803  
PCYT2 64.3502363726659 69.8983723094667 66.2167164788023 59.897987870592  
121.023370640285 63.10917466640396 127.811684080184 112.146987452306  
76.4584539766255 87.8868373144081 86.398312296224 63.2113624676341  
PDAP1 33.1666036387511 36.9994058279362 33.9435456570176 30.4430902995779  
31.6519589095843 34.7983399096627 29.633229264005 33.1477313087177  
35.3227485563945 36.5806287103157 34.3633615460307 41.0657892043496  
PDC 42.0847226073592 42.3781558291981 41.1367478979484 39.1350512687938  
42.0709558258414 39.8455060654531 40.4882741869718 43.6434576713809  
41.2870505273664 42.9866214102525 41.400731343457 42.7782216342806  
PDCD1 41.7397731376692 51.6869155634183 49.7350276169552 79.7937658787441  
36.2048942610546 40.9506062495231 40.9157352260901 49.085741080241  
38.6322728994674 43.0919221375514 36.3390947880186 38.5279745308203  
PDCD10 75.0237373605584 99.9951025176909 87.275548276476  
122.952515297686 98.1598330893405 99.4458090623294 98.9657264176664  
74.0204513459504 122.702789229752 65.7587943905649 64.1675023456571  
99.126949393699  
PDCD1LG2 38.957687788868 39.9697332660833 37.7384958256497  
42.357910063876 39.6535880152834 39.7394181011603 32.6530576979948  
39.2672712041774 34.7722083264266 37.5343260962758 33.8558232866797  
38.6454098044474  
PDCD2 250.504350952583 411.431488342465 322.169157552725 232.815747390118  
274.994470779348 288.508774004052 267.261896105785 155.332764598031  
214.073500272341 187.086662645246 204.344278991396 268.6132471119583  
PDCD2L 116.547937420457 127.232160404726 112.007118067348  
68.9937449813561 264.495576211074 127.961989181945 164.234067632827  
153.037055310357 183.887843429281 81.0880833950735 94.6300022444815  
86.2974544521879

|          |                  |                  |                  |                  |
|----------|------------------|------------------|------------------|------------------|
| PDCD4    | 387.867128019374 | 372.421330252979 | 425.435793468733 | 553.517839467557 |
|          | 175.84382217093  | 376.215561392485 | 293.258858033133 | 713.685405035516 |
|          | 185.165420581989 | 836.472724085903 | 699.488969175268 | 499.550408983803 |
| PD CD5   | 194.225364352044 | 236.595286890677 | 203.092045210928 | 249.942109342324 |
|          | 427.451886998067 | 341.535750991033 | 457.502917254598 | 358.498678171092 |
|          | 330.737070535671 | 167.449422388453 | 162.902264837659 | 255.598083334598 |
| PD CD6   | 1513.74711975248 | 1254.34397143795 | 1035.67547271468 | 543.807654287436 |
|          | 3021.24285327836 | 911.279874196561 | 1835.21901524331 | 860.265067346622 |
|          | 1423.29307392266 | 590.950491348271 | 790.786577596971 | 774.8306350567   |
| PD CD6IP | 79.8196996067124 | 101.020328028769 | 95.6182216943758 |                  |
|          | 70.1293136216228 | 132.87656143652  | 136.959977512354 | 69.2322821603564 |
|          | 75.2950416358859 | 98.2512963929558 | 99.6544408669512 | 115.676508349703 |
|          | 104.089998273812 |                  |                  |                  |
| PD CD7   | 2816.7754199004  | 1756.86714809925 | 2220.90215179682 | 2113.73880184695 |
|          | 1598.78859278229 | 1611.35913846618 | 2393.42629339901 | 2513.15722262176 |
|          | 1752.11152588494 | 2568.97574985073 | 2803.11698341125 | 2215.01815680371 |
| PD CL    | 65.4561038762234 | 62.9904770954043 | 51.8122261766744 | 58.5406981871153 |
|          | 61.5236837309467 | 94.2678678253657 | 76.1869593072029 | 47.3791873993182 |
|          | 71.3932787152381 | 54.6089451252049 | 66.0282565447846 | 66.295597720304  |
| PD CL2   | 41.6354649482853 | 41.2598458726002 | 39.6451483836089 | 44.265834798964  |
|          | 37.5556299264699 | 35.8227939208521 | 40.5585676679482 | 43.3262148375525 |
|          | 41.863927676552  | 37.3179578037963 | 37.6484782516569 | 41.3481355128089 |
| PD CL3   | 173.262440365651 | 196.389446842567 | 169.818067865324 | 180.562005428669 |
|          | 164.146682514925 | 246.896984381287 | 165.411942074375 | 160.336517310154 |
|          | 185.963572053301 | 162.708058265337 | 169.168332370229 | 245.853111206859 |
| PD DC1   | 73.2842501003097 | 95.5156363110528 | 97.8702400145827 | 53.9517841438975 |
|          | 85.8995211302699 | 83.955786676926  | 77.3260618801358 | 104.00520458442  |
|          | 84.1895471533806 | 89.2285288333749 | 75.6428949408034 | 76.1453055441256 |
| PDE10A   | 40.308802735799  | 53.4109882045447 | 41.785676764591  |                  |
|          | 39.6292788039793 | 49.3984571719129 | 36.3433214935314 | 41.5464765641928 |
|          | 42.3887531663733 | 37.9273653326866 | 39.1832968442811 | 37.5583886316038 |
|          | 43.5420658412177 |                  |                  |                  |
| PDE11A   | 40.8163035350222 | 40.5400384479766 | 38.4514334143792 |                  |
|          | 41.3027031037343 | 43.7517118200398 | 41.554942319225  | 41.8315602975157 |
|          | 42.0494116081998 | 42.5750559787101 | 43.9118340045283 | 42.0424641526302 |
|          | 40.4310982248029 |                  |                  |                  |
| PDE12    | 68.9745034946434 | 96.3918711895208 | 94.9104200955155 | 84.8948024208923 |
|          | 146.551751666276 | 78.6402083787251 | 106.140215438654 | 86.915098846441  |
|          | 116.388069891158 | 80.5388767883646 | 76.5505585423421 | 104.486555491331 |
| PDE1A    | 60.7615370761165 | 48.137268437405  | 47.6094573786144 | 68.9067462941376 |
|          | 57.9679239164609 | 262.153247969144 | 44.3440839686558 | 47.0171604359828 |
|          | 41.4435352858263 | 78.7282247242035 | 71.501028931626  | 78.5108643908344 |
| PDE1B    | 46.8141313516997 | 43.7644428186265 | 43.5710871617107 | 60.4646208319121 |
|          | 42.1650127805175 | 51.702461863489  | 40.2154497375715 | 64.2174369755376 |
|          | 44.8997235283254 | 43.844855336215  | 52.2759825608835 | 50.656598108034  |
| PDE1C    | 43.4626049853157 | 39.6995529770239 | 48.0191002461099 | 37.0732977341185 |
|          | 53.1884505015411 | 60.5803031036931 | 40.1235656101329 | 41.4508241771315 |
|          | 41.074824727477  | 44.7958122466628 | 47.8988096575648 | 50.3118072462443 |
| PDE2A    | 59.7179445506128 | 48.0296332183129 | 63.7744603935682 | 99.2432911346944 |
|          | 43.5544347011646 | 71.1607965028029 | 44.3440839686558 | 53.9465584609317 |
|          | 45.0997987980157 | 82.2431666775699 | 79.9567256807679 | 56.6146179789815 |
| PDE3A    | 50.379587451669  | 38.6414316877471 | 46.8267540220952 | 43.1847628331565 |
|          | 49.7235523248653 | 44.0804700754786 | 41.1507980856436 | 44.293922970134  |
|          | 39.0775870687758 | 40.4136535208406 | 49.2206713037152 | 38.3291713594599 |

|         |                   |                  |                  |                  |
|---------|-------------------|------------------|------------------|------------------|
| PDE3B   | 48.3814421939888  | 54.7855575216687 | 78.450972383987  | 123.281175151414 |
|         | 64.0752803796842  | 71.9329028989527 | 58.0139597055449 | 78.9900928241723 |
|         | 62.1796792097014  | 60.1466326805616 | 66.9494774452406 | 55.4635297192076 |
| PDE4A   | 43.3638918705225  | 38.6414316877471 | 45.310660704531  | 40.3180310664156 |
|         | 42.0709558258414  | 42.157627240486  | 42.1607322031054 | 37.6557714476853 |
|         | 36.197424053556   | 39.0648733099061 | 40.9157352260901 | 39.3575468494941 |
| PDE4B   | 53.9517841438975  | 70.0868449397269 | 61.9588517320632 | 999.13039066242  |
|         | 55.3932018462158  | 97.0055689383756 | 219.34503297115  | 79.5707751325986 |
|         | 40.1757392738288  | 47.8207974930031 | 48.7029467273606 | 50.5511827666954 |
| PDE4C   | 3478.67753301901  | 1985.3999418878  | 2528.6392272518  | 2689.80835574654 |
|         | 1393.24135330226  | 1197.13566108661 | 1999.21832626916 | 4427.89837060471 |
|         | 1263.76838179117  | 3329.68037676265 | 3602.30252142918 | 2791.75465171135 |
| PDE4D   | 84.6279355865799  | 104.015868591647 | 83.0959169307948 | 132.760054781304 |
|         | 69.1862663389904  | 285.053017606956 | 50.8388984085636 | 61.3864512710242 |
|         | 75.3761360028971  | 94.5788538659874 | 107.391994714261 | 148.781721594419 |
| PDE4DIP | 43.6706764143908  | 43.4659417177281 | 45.063792968927  |                  |
|         | 42.881371896984   | 40.8303561411077 | 40.9070097355586 | 42.6968849949058 |
|         | 44.3538739568708  | 42.7150227340364 | 40.0637366843165 | 43.4344389653492 |
|         | 41.6112104667038  |                  |                  |                  |
| PDE5A   | 85.6582555450821  | 48.8165026569686 | 51.7739270955254 | 61.7502624458447 |
|         | 49.5666074434383  | 130.716532316693 | 44.7255207589606 | 94.717335243904  |
|         | 45.3490330087217  | 146.196470375622 | 103.577201248705 | 61.4366256816323 |
| PDE6A   | 36.6480005877129  | 42.7775752471711 | 45.5883690965192 | 45.334106390212  |
|         | 39.3667161654772  | 48.1591264215184 | 39.8695929627783 | 45.8669209716694 |
|         | 42.5406888281114  | 43.844855336215  | 39.2542963855807 | 47.0130468198828 |
| PDE6B   | 44.7044140979108  | 43.683792219729  | 38.8775560911841 | 65.8926843080114 |
|         | 43.7517118200398  | 42.0574848021044 | 52.4111687156893 | 44.7044140979108 |
|         | 37.7384958256497  | 49.9493230064613 | 51.7538628098347 | 71.381069076765  |
| PDE6C   | 37.0320432433314  | 38.9338521051669 | 38.941855825269  | 34.8744680930445 |
|         | 39.3999056968598  | 36.7356360093603 | 38.941855825269  | 33.4534810696886 |
|         | 38.0702079388879  | 36.4351122729314 | 37.5343260962758 | 39.4830039788612 |
| PDE6D   | 91.31756001203    | 70.9179240997848 | 85.0946882743418 | 97.8309399470621 |
|         | 84.5572894783679  | 94.7980740999988 | 93.879589378061  | 102.24202987437  |
|         | 131.717764850211  | 87.0573871033894 | 71.6849360818041 | 105.220978559157 |
| PDE6G   | 45.9090659324223  | 47.6914221838216 | 47.3861758958576 | 48.309866878365  |
|         | 54.1225249245036  | 45.8325181856483 | 40.2154497375715 | 50.1833483241864 |
|         | 44.619512785899   | 53.5498255316009 | 49.532546810992  | 42.2577689927563 |
| PDE6H   | 42.3433931248155  | 41.554942319225  | 40.7620472083159 | 43.9282059368202 |
|         | 35.0181575202066  | 46.6872654833579 | 44.9863726205428 | 38.8495095797881 |
|         | 37.6383530120621  | 37.1275334308172 | 36.9060997041453 | 39.6352613956998 |
| PDE7A   | 86.2021418088902  | 109.795084617739 | 91.7296524744575 | 90.9570747667407 |
|         | 88.9538366702651  | 58.6439719071099 | 75.8122107270212 | 82.291097567232  |
|         | 93.3605294458382  | 136.062864107443 | 110.757899996422 | 95.4072431786073 |
| PDE7B   | 66.1229691315616  | 110.399579382196 | 121.86893260878  | 77.5698542248061 |
|         | 91.5258329186709  | 135.454168096854 | 47.8947595316832 | 91.6777754418002 |
|         | 102.9621051111048 | 206.514263103112 | 195.456604920944 | 119.621934826916 |
| PDE8A   | 55.1306642449627  | 49.4362578715263 | 53.1884505015411 | 46.546116650292  |
|         | 60.3768221891131  | 60.1042270393382 | 55.7405934254857 | 46.6384636367629 |
|         | 56.9909890164687  | 51.5338331947847 | 49.7149784386993 | 55.823130565111  |
| PDE8B   | 40.8091178323174  | 57.6459037974353 | 56.0800798275077 | 53.593974682612  |
|         | 55.9283039581662  | 85.2260422401241 | 60.581035231763  | 65.6502223413705 |
|         | 53.9287524861617  | 58.2818491355907 | 70.5619719048506 | 108.007227281411 |

PDE9A 67.5489259940822 66.5141009463313 51.9885249508283 52.4351670989268  
134.776408077533 85.9636350040248 154.355197155161 171.058650956601  
78.7182388025668 78.2484708472671 96.3918711895208 72.2720428359203  
PDF 42.9641759692926 52.5868047927666 44.3648993568405 42.281606728072  
55.8709511400674 42.5193208629123 57.6643188499117 43.4544762830742  
49.5539622682049 38.745552403895 44.2142581488029 41.5536168238478  
PDGFA 39.8184668132023 43.1805016690297 43.7052389230253 37.7088333099214  
43.3832826368789 44.5544727111028 45.656343062947 43.8654109265055  
40.3316153483289 37.6617024361839 43.4370048647278 43.024125424819  
PDGFB 80.9907498621309 58.6494349222795 70.8940689219829 68.4906691348625  
44.6286581923295 47.0940613507321 41.8695090436685 55.2269180741573  
51.631710130416 44.6918600441328 48.0901896064056 51.6660481331154  
PDGFC 111.6348079332 50.4872122867759 57.6371756925687 66.0397471691747  
42.7982502551634 93.748984888348 48.8319884367456 63.0748373122119  
55.6617952786921 73.9732553364283 88.3725577276628 69.2213838763756  
PDGFD 73.3950348855139 65.5730163728961 55.6195455298284 46.0228732507872  
54.2301964914419 70.5699797830702 45.0283997415478 64.3669451425581  
45.0666179335087 71.5948944013406 66.5893437215387 52.2299562256681  
PDGFRA 249.37112382902 141.266956686625 66.1541420734416  
196.355909140782 274.134201700259 350.278532614563 53.4921736109774  
285.97627172608 67.389417016806 226.567000755017 368.913147706435  
293.883582116334  
PDGFRB 1197.13566108661 341.142651038591 195.790389809892  
527.439095170064 290.535354193244 613.740813446728 52.2476631126873  
265.176790020229 68.75304552302 353.076989769287 253.764071470001  
225.53019299714  
PDGFRL 327.912730756303 43.7644428186265 50.2869791217819  
96.7799695976296 72.5027069303875 307.419724291399 130.313381811168  
74.6572522248684 48.1174861108648 180.447835336714 88.8664680253555  
131.779333469955  
PDHA1 121.449647909665 105.699748702315 114.404099081799 90.2790229242453  
129.456543260731 124.22494803053 209.860757709908 135.540738841602  
174.443102016472 107.722626390174 136.250317107253 123.205099929475  
PDHA2 39.7576136507593 41.5132248356707 41.8389336728199 44.0451487108213  
43.2484996523549 41.6178506967511 46.6267962186599 41.3506832276112  
39.4762546236449 36.6396388746561 41.9083581529276 43.6434576713809  
PDHB 492.902027204364 814.991871217268 869.879392791086 646.323419285676  
863.082385199922 911.279874196561 960.526372655577 471.046851874447  
706.914069768466 697.837976820516 729.342532316666 782.639346040155  
PDHX 105.308648028552 159.554916039519 165.190373710254 116.434267173815  
160.405341429329 170.682363891841 137.547711779867 285.12034141287  
176.02137177982 148.781721594419 146.691463448295 219.616289279562  
PDIA2 45.0985088502363 39.9697332660833 41.437237454134 41.3027031037343  
39.0564222526273 41.0582900711341 46.7100796279384 43.0390857698452  
36.2733735494625 36.8059561571675 38.956280281655 39.1553169409075  
PDIA3 35.5179217192467 37.5469247328848 39.5450079747895 35.314469458379  
34.2638875325204 31.6419446793642 38.0598374201407 39.853866204927  
38.5252456306656 34.7308008643142 44.2925355984056 46.0633179231318  
PDIA3P 142.172292334093 166.644251737703 135.567012693522  
113.6408244935 169.251790128723 106.871269007146 114.148080724618  
130.379966531543 230.197573134703 77.5718089378881 105.743957034577  
123.689895848613

PDIA4 249.148159759128 147.209004629384 105.451996424326 140.175068871414  
173.536155357688 76.889690218685 129.697400781396 126.470889051684  
232.911951245618 77.0226403968683 111.320157744612 68.9885481504003  
PDIA5 190.77754486426 139.414044294473 110.540953771795 144.657263336504  
204.200566808626 133.798096986107 148.770228614661 148.770228614661  
96.9051967257119 79.7389069715403 79.8701900696361 87.2175634803271  
PDIA6 381.6928205836 217.821858857631 216.976116788572 168.288592321667  
479.696469083953 234.495626550751 423.254211470935 392.008276951929  
327.631923082696 113.169111095305 130.048910817957 198.729330487352  
PDIK1L 99.9752275166514 122.988056802699 100.824660338235  
81.8727530460686 121.737071786167 81.2314452281031 149.978825406418  
170.172720177618 176.594203350958 125.690995228055 121.851515410237  
122.576931376426  
PDILT 38.5007204246293 41.3610369241157 42.5406888281114 36.7892997857376  
41.9842695818285 40.040778349137 38.4005795891396 39.4710743516517  
44.8003345643334 48.4890615340603 44.553780984244 39.6352613956998  
PDK1 46.0023068797812 41.0678614026819 44.4311655729487 42.1273928203021  
40.9950639693255 44.5544727111028 44.9863726205428 47.4740726032707  
50.401623258584 46.8954576545929 49.7363778831003 52.0359304386476  
PDK2 46.0920218698606 42.5269793679335 47.0055981216687 43.074472921841  
50.2163892855092 55.6242009731278 46.0228732507872 48.1591264215184  
52.1788489555942 61.6670071424359 54.1963147679251 41.5536168238478  
PDK3 100.289042948128 61.7572675712557 87.7652813158198 98.5663841503803  
65.3933030211114 76.4439037944547 100.499763255098 93.2402285327166  
123.480244775709 52.6879797806876 62.5036823572932 85.9286114777649  
PDK4 52.5792653122861 59.4908919662362 100.057155418659 140.894046694804  
130.184962393833 692.630044242985 64.232967574797 113.179313022693  
62.275808835675 351.700618429121 503.187121806288 596.384327208699  
PDLIM1 290.261616334371 893.185203928127 1519.01001038342  
339.679549262298 719.815240381415 363.002913525646 1169.14891282789  
508.081726674689 626.749986744506 985.868043346593 973.363245512859  
1089.08276262641  
PDLIM2 47.9885084629869 38.4330755397458 37.9482157381008  
41.4636047919453 41.8806343997257 43.6670755115848 37.3799542961839  
37.0390589468421 37.5723609429239 36.6893251782922 44.4329005595031  
40.3316153483289  
PDLIM3 654.682263833024 134.884412058457 136.392873701653  
310.900527198512 146.634440537624 1801.44003951248 55.7522234735038  
200.790001763897 54.8946088631931 508.278222733886 608.886783362316  
685.386956092142  
PDLIM4 46.9939712192224 41.3610369241157 40.301483914446  
46.614092935749 40.0599807618105 55.540888910486 43.4544762830742  
44.293922970134 38.3418933808844 41.7405682794166 55.2374601141719  
54.6659845741133  
PDLIM5 80.0381580139229 80.0502531022254 77.4246856935596  
80.1809075683154 60.0736861987141 177.047048502104 64.3669451425581  
53.5271601314404 65.9254098858352 63.5489745357606 81.7500436717038  
112.707612911654  
PDLIM7 144.562563943103 80.6083247572711 91.0443726041992  
194.716672574835 88.051652677564 205.55797140415 107.40295615514  
86.3237770387663 94.4769283676944 125.052841200703 106.276392548097  
120.253165357188

|        |                  |                  |                  |                  |
|--------|------------------|------------------|------------------|------------------|
| PDP2   | 46.8141313516997 | 47.9128504683618 | 53.0104469636221 | 50.8567345921473 |
|        | 52.6922486991742 | 50.560825686187  | 49.2546642180676 | 56.5280894868341 |
|        | 56.1355483199198 | 57.0198225543234 | 62.105802634526  | 55.4635297192076 |
| PDPK1  | 74.5528557785378 | 96.2680061150588 | 91.8935361535002 | 106.10668428032  |
|        | 74.2727109491988 | 69.6097529955737 | 68.9766943946607 | 61.7237308816752 |
|        | 66.2933902512473 | 76.2533853403813 | 66.6341661477487 | 77.8620267163666 |
| PDPN   | 340.662853333208 | 90.99086730704   | 59.9690744676539 | 253.267901237295 |
|        | 188.513581321162 | 86.5513342734384 | 50.8388984085636 | 150.572774995368 |
|        | 71.4864243594056 | 119.634256037186 | 135.580139597457 | 170.082014272945 |
| PDPR   | 65.8959431201418 | 107.264443219718 | 145.027715477051 | 180.930509520136 |
|        | 90.716460692818  | 103.569150754726 | 70.2288685232877 | 138.036631806718 |
|        | 85.0653700751969 | 87.7918574811458 | 145.476204287528 | 86.7823828209946 |
| PDRG1  | 131.990661474974 | 124.002268940785 | 131.882285871258 | 102.00080367858  |
|        | 220.426780242132 | 131.808634405319 | 285.56460901579  | 263.937966521917 |
|        | 220.621142396402 | 157.7623351008   | 142.647217549267 | 152.200107222761 |
| PDS5A  | 127.836645375421 | 129.299077627671 | 140.992072231913 | 133.1387411908   |
|        | 126.492854172749 | 135.644934816665 | 124.324905704041 | 143.399636653204 |
|        | 205.695230410884 | 167.229755109155 | 153.028210322286 | 160.973602503707 |
| PDS5B  | 77.7140342228764 | 76.6346767983285 | 69.4967762263181 | 91.7068354379889 |
|        | 97.2316181542823 | 107.741669334989 | 77.7615826856723 | 70.4262478188233 |
|        | 80.3500323413132 | 102.38706554984  | 105.743957034577 | 104.964345794911 |
| PDSS1  | 63.2753814090696 | 95.010312646142  | 67.5417980425932 | 165.121380058529 |
|        | 146.117756310709 | 72.0674952635945 | 101.898612603107 | 81.3978207813439 |
|        | 108.025082988807 | 56.0183341691645 | 58.9135553403521 | 61.2685222381296 |
| PDSS2  | 719.815240381415 | 478.296779356592 | 527.97309138633  | 540.037371261388 |
|        | 386.934057829091 | 390.834121304799 | 525.522657246248 | 1141.96316762335 |
|        | 404.175196605897 | 635.52621743309  | 576.140066807763 | 498.284928805673 |
| PDXDC2 | 42.6036491382658 | 42.3711524005238 | 41.0718387273629 |                  |
|        | 39.066284740632  | 38.7864161493321 | 39.6251842352088 | 40.0052661202207 |
|        | 38.3684202018524 | 39.8873706855774 | 38.745552403895  | 40.547835538778  |
|        | 41.7072675309997 |                  |                  |                  |
| PDXK   | 736.405815842011 | 507.851120677089 | 592.399245288911 | 598.200103861994 |
|        | 778.723771259404 | 437.542517888395 | 634.514100741768 | 581.396808977873 |
|        | 356.565801074289 | 397.520960156896 | 347.908556198025 | 356.628599887098 |
| PDXP   | 297.739286969257 | 146.133951379664 | 106.325616923861 | 160.056757080676 |
|        | 359.082840694691 | 201.486224052899 | 266.129007472128 | 131.258204302177 |
|        | 245.691073028699 | 101.463033319045 | 112.753674408958 | 94.3229189690855 |
| PDYN   | 39.266565827316  | 40.2493681589104 | 43.6670755115848 | 42.0102671859606 |
|        | 43.6587492470348 | 47.9503724044453 | 34.806104801006  | 40.3357777530419 |
|        | 41.6616444147804 | 35.7202909649682 | 37.5583886316038 | 39.2469742642337 |
| PDZD11 | 40.3478825593224 | 42.6450179841129 | 41.7419877611072 |                  |
|        | 42.8235313007746 | 41.4397539024976 | 43.5416683728269 | 44.4639405506967 |
|        | 42.2577689927563 | 45.1899271235974 | 39.8455060654531 | 48.8744644207821 |
|        | 40.716553247236  |                  |                  |                  |
| PDZD2  | 55.5276281380084 | 45.0115870036541 | 55.5567699051046 | 45.0798408927912 |
|        | 52.9433495155796 | 49.5424425850549 | 36.7356360093603 | 45.642304356051  |
|        | 49.0986627051784 | 44.6918600441328 | 49.319499137678  | 43.6753843488695 |
| PDZD3  | 42.6036491382658 | 52.9603588177082 | 44.9758339877851 | 40.8681871019812 |
|        | 39.2608760193011 | 39.7394181011603 | 47.4439407315335 | 55.9303347977781 |
|        | 37.8319142847141 | 45.5776159432079 | 52.3761286517985 | 41.863927676552  |
| PDZD4  | 41.1523487516364 | 39.2907645923217 | 45.3974838013476 | 42.6913548400127 |
|        | 38.5512429290626 | 65.3801154142721 | 39.6535880152834 | 48.3590401011623 |
|        | 41.6616444147804 | 66.6332042895961 | 60.2165699959135 | 66.0224755625662 |



|          |                  |                  |                  |                  |
|----------|------------------|------------------|------------------|------------------|
| PDZD7    | 37.2474303302343 | 43.5873188565519 | 39.9101908547397 | 40.4359177791566 |
|          | 36.4434672195785 | 33.3470732872681 | 41.3594868055879 | 45.2806199505029 |
|          | 37.8319142847141 | 36.6893251782922 | 40.723990462047  | 41.0657892043496 |
| PDZD8    | 89.0495215957248 | 68.921126710047  | 69.1938570643524 | 80.0042268333735 |
|          | 67.3568864741196 | 62.1857038870283 | 74.9059650336395 | 97.7415824971555 |
|          | 78.4428909886495 | 60.2877434874622 | 56.5402453093703 | 76.889690218685  |
| PDZK1    | 40.7063426028871 | 38.7637503596054 | 39.9101908547397 | 39.6609238036815 |
|          | 41.6383327669122 | 39.9871741554388 | 39.3585350448719 | 40.5158867964016 |
|          | 38.8507804383261 | 39.3016855924751 | 42.2455707947223 | 40.1249533205858 |
| PDZK1IP1 | 171.176393131741 | 42.3550738181144 | 105.376705821141 |                  |
|          | 40.646702696033  | 44.2607789091176 | 43.8582747295766 | 92.4534854832186 |
|          | 37.6557714476853 | 60.7480970026669 | 38.745552403895  | 40.6373400186325 |
|          | 38.1421709520616 |                  |                  |                  |
| PDZK3    | 44.3355304829989 | 42.6939394537076 | 45.3974838013476 | 38.5252456306656 |
|          | 46.8674366115656 | 41.2567470068038 | 42.4939802311136 | 37.6557714476853 |
|          | 39.9444191873552 | 43.9450023643394 | 41.1638563416981 | 43.3744503319109 |
| PDZRN3   | 44.1634313979547 | 41.2271358270712 | 39.6451483836089 |                  |
|          | 44.3538739568708 | 40.8303561411077 | 54.5160292819198 | 40.8721726697835 |
|          | 39.5147641390234 | 41.4374924658579 | 46.0679399375659 | 51.4931742685391 |
|          | 46.3022643383713 |                  |                  |                  |
| PDZRN4   | 46.2231598401576 | 39.2907645923217 | 42.0233072093141 |                  |
|          | 43.5962371290832 | 43.4885245598939 | 174.752830194939 | 42.1372626664516 |
|          | 41.4061152929154 | 40.7847110517594 | 65.0928075335306 | 78.1351673826829 |
|          | 59.5080588072694 |                  |                  |                  |
| PEA15    | 1029.12917222294 | 612.843402058384 | 833.136660528149 | 1465.98242110921 |
|          | 753.976423227915 | 1205.82775512007 | 947.656220635965 | 757.833254346899 |
|          | 1453.77801653969 | 784.951880532127 | 780.708896888794 | 1228.1735887278  |
| PEAR1    | 51.2851682978581 | 40.716553247236  | 48.7039705048129 | 43.3078542962968 |
|          | 58.1242391848692 | 42.5660695551615 | 46.4388841354122 | 46.0633179231318 |
|          | 45.4799270968969 | 47.611018474151  | 45.5707650534259 | 48.1627097465883 |
| PEBP1    | 278.697914107208 | 939.453799186397 | 419.993482471924 | 307.002236094206 |
|          | 771.961354075412 | 676.672146226382 | 1189.22631004243 | 1093.84714207969 |
|          | 547.072513229674 | 696.946621824188 | 603.737787922337 | 463.84209540456  |
| PEBP4    | 40.148780650831  | 36.6968906669565 | 42.640829914102  | 33.4240466670776 |
|          | 41.1868052124344 | 39.2248354955045 | 40.1235656101329 | 44.2159020605784 |
|          | 39.5806465938526 | 41.4397539024976 | 39.2542963855807 | 43.0930293831497 |
| PECAM1   | 148.227172305163 | 188.13862794196  | 253.980053738171 |                  |
|          | 543.268021785502 | 105.018199901228 | 390.978292094212 | 91.8733417805775 |
|          | 109.649431670339 | 86.8463723709337 | 95.5156363110528 | 136.140128421585 |
|          | 171.705718494906 |                  |                  |                  |
| PECI     | 67.1027125641285 | 58.8281931439093 | 86.2563919366781 | 91.2715671868725 |
|          | 128.635811501506 | 140.175068871414 | 76.7483302168542 | 74.383456365584  |
|          | 171.623830248512 | 97.9497090233081 | 85.0275638433103 | 132.294940663192 |
| PECR     | 69.5462764096011 | 52.0268699306396 | 64.5232087947596 | 101.144615206297 |
|          | 93.9708162269401 | 94.3953345963359 | 110.422857502267 | 164.813928846511 |
|          | 73.7873098190297 | 63.7836577144372 | 65.6824363141962 | 71.0340758556049 |
| PEF1     | 163.62024333166  | 164.62751527755  | 194.207518642389 | 174.559216176175 |
|          | 176.75369241505  | 248.563278344035 | 273.849703944739 | 316.604316194398 |
|          | 217.875223856197 | 291.327030793085 | 284.241284057415 | 285.254985583609 |
| PEG10    | 39.3275194442012 | 42.0546888913836 | 37.7384958256497 | 38.9185299014357 |
|          | 39.6535880152834 | 45.0183760283362 | 43.4933087941017 | 38.1362994712477 |
|          | 45.8803291099765 | 44.5264064957804 | 45.7873395324682 | 36.5099686711015 |

|         |                  |                  |                  |                  |
|---------|------------------|------------------|------------------|------------------|
| PEG3    | 49.1868644496737 | 44.4411734611229 | 39.2707964550441 | 46.1673159982664 |
|         | 39.7568367479301 | 102.711934290382 | 48.8319884367456 | 39.0620487644635 |
|         | 41.863927676552  | 62.9205616877344 | 118.854313907627 | 78.3467096982408 |
| PELI1   | 292.667929804781 | 162.160380044249 | 186.655552987116 | 1317.29255644089 |
|         | 143.084029849218 | 214.537530518962 | 233.501069644324 | 314.609371608151 |
|         | 161.573327074375 | 131.471030729546 | 173.536155357688 | 163.43197105141  |
| PELI2   | 73.5534417023453 | 56.5319193881205 | 51.6159542017038 | 148.059385111127 |
|         | 48.2748123114598 | 167.626012561905 | 52.0942589368478 | 59.1107691694766 |
|         | 110.074666148474 | 142.515628954457 | 148.32293918881  | 148.467977704907 |
| PELI3   | 58.1027665533767 | 49.4067286971348 | 47.5673419710251 | 57.8277957325085 |
|         | 46.8674366115656 | 66.0069448981947 | 56.6537562775715 | 46.7980335276155 |
|         | 53.5677764726461 | 89.8035133597498 | 78.8357122967692 | 59.3709786862962 |
| PELO    | 447.448900931272 | 376.141477833569 | 352.019218177371 | 366.326747630465 |
|         | 426.015657750123 | 433.767439244344 | 227.361044585582 | 245.397708807932 |
|         | 254.579513401792 | 290.546420262364 | 338.966238813782 | 455.223217772744 |
| PELP1   | 174.263925108623 | 149.665486488005 | 118.251739134889 | 106.8866235778   |
|         | 202.957014793417 | 151.641746442323 | 305.873069578049 | 194.502731496189 |
|         | 140.288771064502 | 194.985223342082 | 205.605413799808 | 134.869029698594 |
| PEMT    | 68.8005532048281 | 129.76138655102  | 113.759627906335 | 97.3310111513156 |
|         | 123.608921653229 | 92.526038865874  | 157.639656300073 | 134.185571685143 |
|         | 96.143327683221  | 124.134493738558 | 134.258351436533 | 127.60426512782  |
| PENK    | 47.2862299990938 | 45.6533175604486 | 35.9305494063137 | 45.7397504535169 |
|         | 44.9936360641969 | 45.8325181856483 | 42.1607322031054 | 43.2551508830106 |
|         | 36.9060997041453 | 45.7911932481722 | 45.6348103033479 | 40.5703581862752 |
| PEPD    | 344.737170118121 | 651.078746026341 | 482.79099112085  | 649.908096675489 |
|         | 953.143041145545 | 1031.4414268329  | 622.435313940734 | 614.603743904512 |
|         | 876.959744461441 | 338.000998124097 | 494.733185937057 | 437.148137705103 |
| PER1    | 45.4799270968969 | 40.4359177791566 | 41.6079958749402 | 55.8709511400674 |
|         | 41.3755760434934 | 52.5330333302271 | 41.5817737564592 | 47.0940613507321 |
|         | 40.4220196471124 | 46.5650556481721 | 47.8988096575648 | 37.0953622406687 |
| PER2    | 119.015431849218 | 82.2766822827861 | 88.6771566133367 | 104.335120306753 |
|         | 62.4267404482092 | 139.883681090758 | 59.5205055437765 | 179.267796142741 |
|         | 110.379403044901 | 156.02592319461  | 150.778095336356 | 91.7158434954226 |
| PER3    | 71.5484567134601 | 63.1780854659428 | 91.6978282652998 | 78.270329450618  |
|         | 59.1948983423381 | 180.994353525666 | 59.3549213146532 | 87.7295604723036 |
|         | 123.480244775709 | 178.789064142469 | 176.687970262952 | 76.889690218685  |
| PERLD1  | 193.043344611355 | 228.882072078733 | 392.409679550956 |                  |
|         | 89.6115806694241 | 213.162949250252 | 157.856158440506 | 328.788681417522 |
|         | 202.081933301612 | 933.968759959712 | 286.961967690465 | 321.069136463599 |
|         | 196.389446842567 |                  |                  |                  |
| PERP    | 109.155021443311 | 158.806855832703 | 145.027715477051 | 44.9370339275041 |
|         | 79.271901834289  | 43.5752393599169 | 83.8811735017279 | 67.3976855661302 |
|         | 85.5711312226989 | 143.173898886465 | 131.824854999638 | 137.831070407907 |
| PES1    | 49.4151347850687 | 45.8669209716694 | 43.7630587657205 | 50.2163892855092 |
|         | 56.4685270445642 | 49.1013967533186 | 56.2181240696479 | 52.3068458655445 |
|         | 51.3511088648386 | 51.5855515705917 | 39.9070785037411 | 41.4508241771315 |
| PET112L | 57.7877627794725 | 75.2101993995344 | 89.7299583757595 |                  |
|         | 65.084620579901  | 65.0605897122361 | 99.1667512831715 | 126.253578620746 |
|         | 64.2174369755376 | 131.238796973323 | 94.7110944331075 | 110.909109947659 |
|         | 76.2533853403813 |                  |                  |                  |
| PEX1    | 77.7665223272661 | 85.0308877626746 | 116.949813289388 | 64.3746985855249 |
|         | 100.034549511526 | 87.1735705257803 | 62.0404348860702 | 76.0709828871754 |
|         | 96.0838701986116 | 65.2361525412756 | 66.2027948645675 | 86.8194399159684 |

PEX10 43.7585538437696 42.6022652963326 40.301483914446 37.1317006162938  
 45.3675390992851 36.9060997041453 42.357910063876 41.3506832276112  
 43.2163597439147 40.7063426028871 44.3763859390287 35.8108713625055  
 PEX11A 44.5282181324797 44.1239711172417 38.3166554965434  
 40.7481155008596 51.3511088648386 38.5252456306656 49.540449125788  
 60.9009676344258 56.432280646473 66.4510869175159 74.280612516205  
 56.5225014032155  
 PEX11B 527.439095170064 293.819595688805 771.134853667175  
 301.198565023795 410.979796414875 282.646286144563 274.081959734368  
 484.482971152057 524.047008889711 455.898996745515 372.330242931581  
 343.677907141241  
 PEX11G 50.7390160399184 46.6996902348633 49.2041300973417  
 35.0448343468967 43.7517118200398 44.8872784170036 47.7390230243778  
 56.3560498705517 48.1174861108648 49.9493230064613 40.723990462047  
 51.9447450229707  
 PEX12 42.8539910132415 39.7835513496873 45.1899271235974 40.4967168818294  
 44.7210190486327 41.159706131351 40.6750540874299 39.5083491499018  
 39.1790517315259 40.4518431978241 40.7725311293918 43.7672102682067  
 PEX13 221.743315748689 89.5349434357106 98.1433318215702 69.9499565182502  
 151.621572940457 70.5025097213784 104.8505815954 125.690995228055  
 157.161381086926 69.0530953932111 76.4389426517528 97.1271615802556  
 PEX14 85.3718124658316 126.389908470189 129.938114164087 84.8948024208923  
 133.893108529325 148.467977704907 143.497887869284 106.398825125486  
 114.230358276599 268.38649000825 235.925374041038 191.668846959973  
 PEX16 93.510976676576 229.47693624489 270.89711217076 162.486448421519  
 183.918927595056 168.737634511775 177.779514321673 159.667153030627  
 237.039707901886 206.899594905509 213.162949250252 149.19643034862  
 PEX19 114.404099081799 212.688298502868 286.927016665685 130.274451794636  
 290.884313999173 220.192552354287 228.660261263355 152.17335005192  
 394.764369100963 208.457587834567 211.654245727798 235.888544042065  
 PEX26 43.1805016690297 45.0115870036541 47.9035532886869 41.2445895434274  
 47.27543600687 41.5132248356707 45.4164642922183 45.2806199505029  
 48.5792058061372 42.6366765186182 44.3440839686558 45.5342598239058  
 PEX3 40.0557788909923 38.2263227947189 39.4710743516517 40.7481155008596  
 42.4864576619427 37.9951997351435 39.8695929627783 43.2551508830106  
 41.074824727477 42.2614524730856 41.5421429082231 44.2527566343661  
 PEX5 452.969595001684 339.52415679299 389.248080358801 234.308728996238  
 383.371300272181 349.767857026458 274.493399403322 356.079406408042  
 432.355300448283 456.992521713593 382.744696166534 359.889643461047  
 PEX5L 38.5007204246293 39.6995529770239 44.2405728317107 40.4967168818294  
 41.4397539024976 42.4155142987678 38.7745734037492 44.0736170668178  
 40.0870341983328 38.957687788868 40.2317542073211 42.5365257225985  
 PEX6 100.403196213407 78.6705291023488 74.0913177754682 51.0175677516029  
 61.1216330559316 66.1082848714279 42.9803717121865 75.4272782742534  
 65.0810479794187 116.76301232629 106.20479137406 144.139555313429  
 PEX7 93.5982028088194 101.020328028769 130.506891299903 79.7937658787441  
 77.9085946827079 69.2685201884906 110.223625398261 82.8218647837178  
 72.8653205184014 78.1683130800805 94.8036856848998 106.20479137406  
 PF4 35.7012997405508 40.2493681589104 37.9482157381008 42.8235313007746  
 43.7517118200398 38.9378717994178 44.9863726205428 32.4466419672036  
 36.2733735494625 41.3321861371202 38.3684202018524 41.4508241771315  
 PF4V1 45.4799270968969 47.765848710116 50.8303921211581 50.378948785456  
 49.5666074434383 48.260931742163 50.5252048155459 47.0940613507321  
 55.3122077514658 55.9283039581662 47.6884372645373 43.4709415392696

|        |                  |                  |                  |                  |
|--------|------------------|------------------|------------------|------------------|
| PFAAP5 | 64.668912004173  | 142.49850553035  | 166.188557509096 |                  |
|        | 155.287591646469 | 225.389113475883 | 297.701126167694 | 207.513604688444 |
|        | 96.332996264667  | 131.645714321903 | 160.056757080676 | 150.829277770546 |
|        | 185.72957253374  |                  |                  |                  |
| PFAS   | 79.7564155881026 | 107.654589391726 | 97.7620313090597 | 70.506090074243  |
|        | 123.176449895397 | 92.9820860411485 | 127.811684080184 | 112.211717641877 |
|        | 79.1074681877535 | 110.550102209676 | 134.646159826262 | 110.52925781809  |
| PFDN1  | 352.47015903013  | 260.740251007349 | 255.162270021715 | 425.435793468733 |
|        | 262.735075993242 | 385.827237353675 | 271.961673480206 | 315.487514440864 |
|        | 335.330937634207 | 277.588692595406 | 276.267583952979 | 314.992390390165 |
| PFDN2  | 30.9241129241985 | 39.7835513496873 | 48.4890615340603 | 33.9645433044281 |
|        | 40.0599807618105 | 41.2567470068038 | 39.2533668167483 | 36.8400213077707 |
|        | 35.860430241131  | 45.5776159432079 | 43.7585538437696 | 42.57175366709   |
| PFDN4  | 46.8141313516997 | 47.087835967892  | 51.9885249508283 | 46.3203995372658 |
|        | 54.4586176399381 | 51.9421032049606 | 51.1541843174981 | 52.9813204449021 |
|        | 52.1186591838715 | 53.3059058105836 | 54.4825201506931 | 49.8253396161069 |
| PFDN5  | 1731.19220270448 | 855.602941621804 | 1228.1735887278  | 1712.55038816005 |
|        | 701.551782736435 | 2133.78836857697 | 845.41973083225  | 2435.70120719503 |
|        | 1319.32406112346 | 1999.21832626916 | 2146.1548633579  | 2272.91548405176 |
| PFDN6  | 146.173307474688 | 112.944044862693 | 104.832753086298 | 74.0093517743852 |
|        | 134.62138052303  | 83.2083460752986 | 163.011116329807 | 154.959129917681 |
|        | 110.219274023648 | 75.9037617394486 | 90.807818984128  | 121.969082013079 |
| PFKFB1 | 39.266565827316  | 44.1239711172417 | 42.4580504587581 |                  |
|        | 44.6905691366696 | 41.3755760434934 | 36.4986986135769 | 42.0605906240248 |
|        | 46.2779564481158 | 39.3750969348308 | 42.5664883002833 | 44.8872784170036 |
|        | 39.6352613956998 |                  |                  |                  |
| PFKFB2 | 48.6184776976167 | 53.8499082625091 | 55.6282425338897 |                  |
|        | 65.3191216270241 | 51.940083408061  | 45.764546125016  | 48.3411413510851 |
|        | 54.9025626101017 | 50.4974478884077 | 46.2812662789806 | 45.6677978788306 |
|        | 48.1210452368919 |                  |                  |                  |
| PFKFB3 | 871.771475356705 | 290.031202636467 | 335.167786298149 |                  |
|        | 1855.0119962662  | 275.673080691335 | 405.148979342648 | 567.675954219815 |
|        | 386.98657211459  | 839.850453078119 | 134.394743648475 | 140.199798713912 |
|        | 318.369837408344 |                  |                  |                  |
| PFKFB4 | 438.50123471613  | 221.049503614433 | 464.99944459917  |                  |
|        | 357.507822825765 | 183.918927595056 | 85.5027511448958 | 631.371154527474 |
|        | 151.686513723244 | 722.514380928291 | 142.933216800073 | 126.546330358591 |
|        | 139.625593914573 |                  |                  |                  |
| PFKL   | 139.625593914573 | 271.813877560354 | 375.757961593064 | 114.124846622876 |
|        | 246.351606918353 | 152.72007888133  | 316.185342210304 | 179.629622763381 |
|        | 341.078728185917 | 237.632703283663 | 226.262409390222 | 158.685201053359 |
| PFKM   | 113.704541686372 | 88.1413320312949 | 127.265200736376 | 76.9373289454707 |
|        | 184.162452344446 | 201.764909400617 | 105.247736284747 | 126.470889051684 |
|        | 119.872031126474 | 113.873117749074 | 169.75692324104  | 128.436305192918 |
| PFKP   | 696.113365766871 | 690.568858101531 | 628.84789420227  | 380.188301866313 |
|        | 393.648308810931 | 481.318671971899 | 953.143041145545 | 445.421601813221 |
|        | 987.427672417105 | 537.841677481011 | 540.170798097714 | 630.150754732971 |
| PFN1   | 3329.68037676265 | 3941.3269626913  | 4168.41947709165 | 4216.69417265779 |
|        | 3010.38998829232 | 3043.12489526581 | 5074.07305640514 | 2966.53151444114 |
|        | 2077.74475301595 | 2405.8635632802  | 2611.32405374107 | 3124.84336032646 |
| PFN2   | 142.840631375936 | 120.090807153941 | 299.74710723735  | 68.9937449813561 |
|        | 236.307055572306 | 169.664184704618 | 188.552900887757 | 200.958421322871 |
|        | 226.456072107079 | 205.830801439839 | 172.102568448455 | 272.930242946726 |

|       |                  |                  |                  |                  |
|-------|------------------|------------------|------------------|------------------|
| PFN3  | 39.4710743516517 | 37.1685072112618 | 37.3687900733549 | 36.4564050256915 |
|       | 36.8059561571675 | 40.650742261428  | 39.7576136507593 | 44.0390019242862 |
|       | 38.0213051227859 | 39.5637454855233 | 37.9230440150891 | 35.5523662009011 |
| PFN4  | 41.5421429082231 | 37.7384958256497 | 45.4865173433646 | 49.3654837541353 |
|       | 49.452985143568  | 42.357910063876  | 55.695361644141  | 57.6684494624163 |
|       | 49.641159251878  | 51.2318935933116 | 46.4753015651202 | 49.0655215909632 |
| PFTK1 | 77.3752541676627 | 44.3529919625344 | 42.5406888281114 | 83.877343750194  |
|       | 47.5647821785529 | 74.2690269784394 | 41.4742337714895 | 46.9986083378817 |
|       | 66.603126065489  | 55.6069214673486 | 56.8436081694537 | 53.5643281930979 |
| PFTK2 | 41.6354649482853 | 37.958111840848  | 41.1367478979484 | 43.607701594929  |
|       | 40.3452320167286 | 40.8634043028528 | 39.3999056968598 | 39.2248354955045 |
|       | 40.1738310955128 | 36.9848592422398 | 39.8577530602176 | 40.8681871019812 |
| PGA3  | 40.912137973557  | 42.569661329101  | 40.0440633413412 | 40.9085497163517 |
|       | 44.7210190486327 | 51.2318935933116 | 40.6336801346817 | 40.7826380785043 |
|       | 42.3694707318028 | 44.081163104701  | 44.3440839686558 | 44.5966112733343 |
| PGA4  | 33.9561816279577 | 35.7393138893354 | 41.437237454134  | 39.2780515621926 |
|       | 35.9058393060637 | 41.8613406887824 | 38.6243997507646 | 36.0306975524309 |
|       | 39.2809305246091 | 40.4136535208406 | 41.6336636285875 | 38.4330755397458 |
| PGA5  | 32.821392987958  | 38.5252456306656 | 37.8386378737561 | 41.0726336841311 |
|       | 37.0526522140242 | 60.877229406755  | 40.0052661202207 | 39.0620487644635 |
|       | 42.0621425894624 | 42.785429206422  | 41.1638563416981 | 39.4490233720848 |
| PGAM1 | 316.419421649196 | 621.489785652602 | 746.847753035399 | 398.049525642349 |
|       | 460.340300658834 | 395.298033031033 | 521.546082699431 | 137.935526876566 |
|       | 738.66912772732  | 116.099186392258 | 173.328468320432 | 487.163435704392 |
| PGAM2 | 39.6609238036815 | 38.8336427948187 | 44.9758339877851 | 36.5393857306744 |
|       | 43.1252272136667 | 41.4508241771315 | 41.0381860307445 | 39.3709357615493 |
|       | 42.9020321355927 | 39.9948390976317 | 42.7275315121163 | 39.6352613956998 |
| PGAM4 | 184.466097348908 | 248.797398220982 | 349.371668774717 | 234.615033303459 |
|       | 227.059460958349 | 212.813224717262 | 241.849566505679 | 96.9158008116945 |
|       | 387.311743342483 | 99.3142021810133 | 115.299308625328 | 273.705329906513 |
| PGAM5 | 105.580434427464 | 93.748984888348  | 91.3890908971311 | 58.6448193204993 |
|       | 129.754481922118 | 72.2120805585702 | 108.660169650259 | 67.8828234986518 |
|       | 137.551493752877 | 56.4553747079294 | 68.7726018349481 | 73.6912600813189 |
| PGAP1 | 38.5648843914189 | 77.5737637002275 | 54.6051538001037 | 45.1944222548351 |
|       | 64.7488184936482 | 44.8872784170036 | 47.5963750520409 | 54.6067620335514 |
|       | 67.591570323687  | 106.590506599473 | 95.0604882262201 | 92.6545309624315 |
| PGBD1 | 53.593974682612  | 51.119812302881  | 44.2405728317107 | 44.550322123994  |
|       | 52.4370718282084 | 51.1621379498014 | 76.6094442444074 | 60.9009676344258 |
|       | 45.6582729799009 | 51.2318935933116 | 49.6706535876636 | 50.4847465816184 |
| PGBD2 | 59.7179445506128 | 65.4493288628375 | 54.4384603094793 | 44.3440839686558 |
|       | 51.7983110178095 | 43.6670755115848 | 54.339958888486  | 43.4544762830742 |
|       | 58.9056300364078 | 51.5855515705917 | 54.6603683143597 | 55.6351010690528 |
| PGBD3 | 52.5792653122861 | 47.6229101519945 | 47.9035532886869 | 42.8235313007746 |
|       | 47.3172462673426 | 36.2015763253919 | 45.8980298854198 | 41.2551966132486 |
|       | 50.7619345314571 | 52.0999467564713 | 49.1868644496737 | 53.840976437122  |
| PGBD4 | 44.2718517563299 | 41.6069493017095 | 42.2577689927563 | 42.7489468897708 |
|       | 45.6409129284202 | 42.9695585740813 | 44.2166118829877 | 42.4926864381766 |
|       | 43.2761454096265 | 43.4885245598939 | 46.1390887492649 | 46.8129509799753 |
| PGBD5 | 61.8529316708431 | 47.6229101519945 | 37.7384958256497 | 42.357910063876  |
|       | 39.0564222526273 | 43.1826328292558 | 47.2927436772465 | 45.5581356216957 |
|       | 53.3094843669564 | 47.611018474151  | 46.972521499515  | 47.6040671292013 |
| PGC   | 39.3709357615493 | 37.6383530120621 | 73.4962349716902 | 42.4580504587581 |
|       | 38.8456942580061 | 41.0582900711341 | 40.3302268293707 | 36.43924066428   |
|       | 40.5912213523345 | 37.0320432433314 | 41.0808257270221 | 37.7526485343328 |

|         |                  |                  |                  |                  |
|---------|------------------|------------------|------------------|------------------|
| PGCP    | 161.283979969295 | 87.1735705257803 | 99.8906210560132 | 230.787791652978 |
|         | 221.71759246183  | 690.568858101531 | 72.983338488605  | 112.714318425036 |
|         | 102.220824629896 | 286.340091833711 | 255.197732321307 | 313.174026684189 |
| PGD     | 1315.60546296361 | 702.737741114234 | 832.181997440212 | 1311.88650141004 |
|         | 1585.90718459092 | 706.914069768466 | 1762.93413846062 | 1094.91235708087 |
|         | 1269.36837611919 | 356.565801074289 | 373.399443929227 | 384.727543700024 |
| PGDS    | 40.3478825593224 | 38.8336427948187 | 41.6977706798234 | 43.9282059368202 |
|         | 43.7517118200398 | 54.2503023961401 | 41.9393838138203 | 39.7509165247419 |
|         | 42.357910063876  | 42.8936990772838 | 41.8168470823451 | 42.357910063876  |
| PGF     | 52.109723558511  | 52.5380506348717 | 91.5230424957075 | 62.1776700757427 |
|         | 48.0234896130991 | 49.8472708021525 | 41.9393838138203 | 42.4580504587581 |
|         | 115.88156897199  | 45.1569741609597 | 42.357910063876  | 50.8442982601142 |
| PGGT1B  | 65.8306182796781 | 59.8400088701028 | 76.450993090133  |                  |
|         | 123.608921653229 | 83.764882413379  | 65.2014839770255 | 74.2690269784394 |
|         | 68.6704961638492 | 79.2129308982479 | 42.9866214102525 | 62.2965257278236 |
|         | 71.8539743926881 |                  |                  |                  |
| PGK1    | 476.653723741096 | 496.791391622565 | 488.089090043145 | 618.293140877956 |
|         | 356.318517117856 | 328.908952548641 | 349.096725048776 | 230.344359535334 |
|         | 986.40790007743  | 150.709301569371 | 188.582370265555 | 366.915943380617 |
| PGK2    | 41.3785995857154 | 37.6383530120621 | 38.6727842796202 | 38.2041059863839 |
|         | 36.9060997041453 | 38.7578265341627 | 37.3508690072156 | 39.0620487644635 |
|         | 38.0213051227859 | 36.9102644736882 | 39.3789825717286 | 40.1700117452801 |
| PGLS    | 349.030389220324 | 751.953794043451 | 564.929183025034 | 432.669787408904 |
|         | 938.151864971251 | 496.444080712528 | 586.281182112872 | 630.53864514662  |
|         | 585.421238639853 | 629.763102939071 | 713.685405035516 | 462.362735276132 |
| PGLYRP1 | 45.7356815244513 | 45.7979032939211 | 49.3780606970538 |                  |
|         | 113.388372364837 | 40.5710637884029 | 59.8102324370568 | 73.4820932957859 |
|         | 42.357910063876  | 43.5669306063196 | 42.785429206422  | 42.2618615571566 |
|         | 46.8129509799753 |                  |                  |                  |
| PGLYRP2 | 36.7356360093603 | 37.7384958256497 | 42.2577689927563 |                  |
|         | 40.7481155008596 | 43.1252272136667 | 42.357910063876  | 35.7055410599146 |
|         | 39.853866204927  | 38.6322728994674 | 44.571915452417  | 39.153226699662  |
|         | 40.5703581862752 |                  |                  |                  |
| PGLYRP3 | 40.7022020432945 | 41.8848959280916 | 40.148780650831  |                  |
|         | 44.1483976313959 | 42.5449473689701 | 42.9104454767916 | 42.357910063876  |
|         | 43.4885245598939 | 41.2870505273664 | 42.02667925031   | 46.1390887492649 |
|         | 43.6434576713809 |                  |                  |                  |
| PGLYRP4 | 46.0023068797812 | 44.9370339275041 | 46.9040704638073 |                  |
|         | 45.334106390212  | 48.9627346956003 | 45.8325181856483 | 43.8206425661746 |
|         | 42.0494116081998 | 47.5564423692142 | 43.4885245598939 | 44.2142581488029 |
|         | 46.4499258373233 |                  |                  |                  |
| PGM1    | 1107.96086673001 | 286.045253557021 | 566.77872642437  | 443.722380814789 |
|         | 552.162906190653 | 872.305108096296 | 460.994460486229 | 359.889643461047 |
|         | 1327.93833415582 | 451.979764914543 | 452.883337614277 | 931.401929277001 |
| PGM2    | 108.022329297132 | 258.30549459038  | 258.517751279605 | 121.423421895502 |
|         | 746.550225537883 | 192.861174667738 | 338.586852166449 | 298.420882349382 |
|         | 263.636675573982 | 145.676955166566 | 198.056931905227 | 172.698530496379 |
| PGM2L1  | 119.362992523422 | 61.2450200533343 | 68.3234331335073 |                  |
|         | 70.7202372217584 | 59.9326265577462 | 131.126942328593 | 85.9692990407066 |
|         | 70.6568303458436 | 54.5952754712007 | 73.7133884699889 | 71.2370255410834 |
|         | 88.4819048592858 |                  |                  |                  |
| PGM3    | 90.9521112485099 | 71.193768715137  | 72.5835488194631 | 77.6574950328663 |
|         | 59.7483827511172 | 76.4983049841207 | 78.0522475574761 | 85.1544284060549 |
|         | 60.8635925649592 | 52.8928296360463 | 50.6473771879221 | 77.2608629053098 |

PGM5 72.9154861179393 59.1533197797534 56.0941531606368 125.172065218289  
48.3814421939888 2354.00192115549 40.498907898632 118.67727980117  
43.0390857698452 1626.71747158994 1362.12587130194 950.740991182127  
PGM5P2 39.3709357615493 37.2103401831788 38.2280071951674  
39.6292788039793 37.8343741244069 37.5887129572848 37.4425446412772  
42.9887069977696 41.9635525160083 39.8873706855774 40.9157352260901  
39.0916553915607  
PGP 74.6776631832355 66.2702569771609 67.1299518044849 69.6511571901941  
66.5187917407182 57.678188678075 69.5380697712471 51.1694248620208  
86.2563919366781 64.0162246399972 67.0904616289706 52.153603364404  
PGPEP1 34.4896350146096 48.3699741879723 42.640829914102  
44.1483976313959 49.5666074434383 48.3686935595826 40.2154497375715  
44.293922970134 43.8482802038826 45.3530683538086 41.6336636285875  
45.8546719310325  
PGR 45.4799270968969 45.1694246393676 38.7745734037492 42.8235313007746  
41.8806343997257 47.8636003588181 45.1017494688414 48.272324215504  
42.1594905198929 44.2580151149956 45.4799270968969 38.9496515344837  
PGRMC1 711.08269990525 1205.82775512007 962.079396754147  
439.241483765416 1942.5006281841 976.566026758227 1493.20520979227  
1081.97502255142 1664.00821059181 971.856840043688 1382.25775340179  
1457.72260892651  
PGRMC2 605.970682363975 635.050535522135 738.059797123491  
480.260282672252 889.638287212686 644.733901442573 761.341795853104  
652.480459437977 759.94822128584 1142.67599037881 1132.19026676901  
966.803172864162  
PGS1 165.107387190373 237.443715611786 212.152751915521 414.539381761279  
227.817928402227 142.192315159235 236.565670642447 198.951182954651  
159.416887501941 202.278172239082 220.426780242132 243.843941346211  
PH-4 73.8374823243007 140.677730827458 120.046457114882 78.6344248102932  
149.620814280822 73.1640951333742 107.148000219752 82.3364971911816  
104.103899614521 118.771995863848 100.45351084408 101.468662074178  
PHACS 64.2690842803282 78.4289643729837 85.8059456975413 58.0218262176065  
66.3075095149783 60.877229406755 112.281286038716 79.6133633483649  
74.220854748627 103.808640431626 74.6474346708746 65.6213260281822  
PHACTR1 51.413025495745 36.6968906669565 48.2883694323339  
463.022816882856 43.6587492470348 48.7781962164988 60.7992483126292  
52.3068458655445 41.4636047919453 45.2556760873335 39.9899430628542  
43.3744503319109  
PHACTR2 75.8122107270212 230.117814622646 125.465429498178  
175.271140689255 153.139323479953 158.156217755244 193.01447006167  
161.683983819852 72.5993974280876 81.537796828766 95.0604882262201  
111.357508398822  
PHACTR3 41.6698172204688 54.3753177017125 42.7909073846368  
41.3610369241157 42.5534565507139 38.5820580681358 47.5963750520409  
40.1812622331588 39.4397788230732 41.5838486090904 50.8485682149772  
52.1626804858419  
PHACTR4 136.355036262681 147.689479458785 141.942507674009  
107.54932544455 175.632783805966 125.265619075038 133.259195601344  
132.205423909251 213.590067519021 114.224091812993 128.365609268093  
115.229070906222  
PHB 356.628599887098 243.803668806533 212.152751915521 176.27162536342  
226.882600557693 423.093020788912 396.93169345515 267.359645500185  
753.976423227915 431.168903637888 457.860665614779 390.098287325957

|       |                  |                  |                  |                  |
|-------|------------------|------------------|------------------|------------------|
| PHB2  | 307.394333843045 | 481.145001682177 | 403.796135347069 | 267.475563253966 |
|       | 424.085665569421 | 525.35784336478  | 458.230500859847 | 363.527881831453 |
|       | 548.047774435177 | 528.512401493184 | 461.123856163975 | 425.60854194674  |
| PHC1  | 80.2650269182886 | 70.5699797830702 | 91.6033269431304 | 66.5921967967793 |
|       | 54.3116862772198 | 73.8105012820769 | 78.9900928241723 | 85.5316122504411 |
|       | 62.7977686460693 | 92.563449632567  | 72.1955435994725 | 93.4180535865914 |
| PHC2  | 77.1287755867582 | 72.5752072120178 | 72.93977835851   | 148.964204638494 |
|       | 77.7615826856723 | 85.4429281595877 | 85.3227908896318 | 75.8976034525022 |
|       | 86.398312296224  | 69.734208465775  | 73.8374823243007 | 75.9659252679925 |
| PHC3  | 44.2350046179299 | 52.6364613846829 | 50.0050760710506 | 58.106070377898  |
|       | 52.1186591838715 | 56.4819802857598 | 74.0039764902057 | 76.1493261430901 |
|       | 58.9870089759222 | 55.6865353018811 | 58.9676332048764 | 56.9133235865341 |
| PHCA  | 76.7820250461545 | 73.3950348855139 | 70.18107651423   | 237.693838921691 |
|       | 86.1633564934019 | 99.4846339370133 | 96.9051967257119 | 120.142759111608 |
|       | 74.7934385405346 | 83.764882413379  | 125.221639689345 | 100.049462976601 |
| PHEX  | 44.7044140979108 | 46.6314009405034 | 46.3411353377615 | 43.9282059368202 |
|       | 40.4639532172338 | 37.4782441311626 | 45.6042625176633 | 40.047314525032  |
|       | 45.8325181856483 | 36.0481934423077 | 39.7342718293432 | 39.1553169409075 |
| PHF1  | 68.1209771323232 | 58.0722340887264 | 84.3040298294164 | 84.8948024208923 |
|       | 57.7728695906126 | 98.4636016442768 | 59.9792284253187 | 64.5845827915699 |
|       | 73.5161632100822 | 133.314819245044 | 114.288115730578 | 77.0262811825953 |
| PHF10 | 95.65872032796   | 114.41703170676  | 131.717764850211 | 99.4184778430267 |
|       | 101.277664841914 | 101.272774711455 | 123.674164545425 | 79.3614922672599 |
|       | 102.163854544231 | 74.5694657001572 | 74.0420372528779 | 122.482560090133 |
| PHF11 | 299.052630634189 | 433.637087338002 | 347.750020791938 | 470.453915397461 |
|       | 228.809697062726 | 358.779372054826 | 351.883708151967 | 332.276510973163 |
|       | 347.003621791919 | 419.741944629785 | 372.525928228911 | 368.793978305607 |
| PHF12 | 63.9371474698484 | 64.0476795495651 | 61.4884606677516 | 46.9851852273214 |
|       | 61.3733228199803 | 54.3753177017125 | 64.4736987797413 | 64.8336014343435 |
|       | 63.4176152858138 | 70.3629652777935 | 65.0423160790157 | 64.0985088513857 |
| PHF13 | 192.058030454066 | 189.984886903595 | 215.399634344016 | 133.1387411908   |
|       | 286.832539203237 | 218.013913036142 | 261.6201598868   | 238.246319539302 |
|       | 210.308352532282 | 269.618616631857 | 255.915599666591 | 257.851199206959 |
| PHF14 | 79.4528447794527 | 92.7082075328685 | 75.2977438265751 | 67.7121534934164 |
|       | 116.22441634196  | 76.5888466260562 | 94.3872450727268 | 92.3034609409756 |
|       | 100.248038733326 | 68.9562915755919 | 70.4856977039037 | 74.4722810710524 |
| PHF15 | 190.465025329717 | 112.787082951803 | 162.486448421519 | 191.09175268141  |
|       | 102.77259665192  | 263.53897660224  | 106.599578931817 | 148.770228614661 |
|       | 106.799510275842 | 289.625425434103 | 228.778506556448 | 171.770578381558 |
| PHF16 | 93.5358142196619 | 83.0460206754856 | 80.6317356144732 | 63.0153175111747 |
|       | 81.0880833950735 | 92.6482170400325 | 168.91210897306  | 153.237127853072 |
|       | 128.923092916744 | 83.3729277601518 | 84.7058085717914 | 84.7503257101143 |
| PHF17 | 60.0219418084008 | 57.1266329529869 | 77.0927030014721 | 76.7806009547111 |
|       | 62.1013691632762 | 107.980578497185 | 89.1012752492647 | 62.7515429046888 |
|       | 66.7977843897621 | 90.1696131791736 | 105.647054678056 | 81.2359429678503 |
| PHF19 | 61.141483572676  | 61.2108152457954 | 53.6438003974874 | 73.2688836550382 |
|       | 71.0593419018503 | 92.2001835784782 | 73.4054815980448 | 61.130286531713  |
|       | 66.2552876795581 | 65.0359415104302 | 59.3082373468217 | 58.7382738968248 |
| PHF2  | 134.113913870501 | 139.614715580418 | 85.1227830573138 | 111.77505926669  |
|       | 100.344513700137 | 123.855293655347 | 105.45765455249  | 95.5156363110528 |
|       | 109.137372445043 | 145.050655626219 | 169.301010687893 | 116.725539898394 |
| PHF20 | 87.4335749014848 | 72.9051985681184 | 86.9032093551446 | 108.660169650259 |
|       | 97.4137766910365 | 94.3953345963359 | 113.198141130994 | 76.7710944291287 |
|       | 76.6027293497456 | 83.5069968129733 | 97.2615918872914 | 94.5501397951415 |



PHF20L1 78.649592956584 92.4449920876332 70.9767460064692  
 146.858315797845 72.9700748169457 76.3790849853724 65.5618920437306  
 60.8581462216607 82.7229468743536 67.8688083153991 68.2585858486846  
 71.2168693013526  
 PHF21A 302.083293019113 301.025314855652 243.549194928524  
 490.876152145712 210.005571009784 415.15150032168 213.622816589927  
 282.52439146354 283.951419701286 436.627613548713 405.496884468464  
 385.675278463448  
 PHF21B 46.0023068797812 39.3999056968598 42.7303139017786  
 45.5869891570251 36.2048942610546 43.9724628401189 38.5066108855005  
 40.1474543172332 38.1169703906207 41.4397539024976 46.4753015651202  
 38.2350720635382  
 PHF23 93.0714382925187 81.4621222177298 88.1797799963114 79.4528447794527  
 70.0133734659853 59.3618843678775 90.2915974511786 77.523734787944  
 88.0877175295544 104.611421732227 95.4841914842335 83.7829283976292  
 PHF3 169.889618506937 222.81957100654 265.176790020229 278.925589549838  
 188.457593309678 265.930422462959 237.974766880957 246.351606918353  
 225.056827821165 284.241284057415 251.299662213686 285.689076149891  
 PHF5A 339.088535171641 208.804071011518 203.373397813051 278.697914107208  
 316.419421649196 313.763121699885 313.233036704221 361.945511835039  
 307.394333843045 176.670909065664 236.910422092851 260.093838596699  
 PHF6 41.5787026298957 43.9063490244748 44.4612332327353 40.8211872708071  
 42.6520415016543 38.7537364570873 43.0930293831497 42.0930656891788  
 42.6679886757687 37.958111840848 41.4508241771315 42.6208563330129  
 PHF7 44.2760426402717 49.1855323567224 54.4384603094793 48.260931742163  
 44.6160092538827 44.7804080899431 46.6198823890826 46.0119912782855  
 46.4164127487052 51.1621379498014 44.2925355984056 45.2783024981315  
 PHF8 37.8877750141557 41.4508241771315 39.3709357615493 38.3166554965434  
 40.5235471987417 38.1699123824764 40.9157352260901 39.512606833112  
 42.1594905198929 38.5921548841176 39.8184668132023 39.6833800000587  
 PHGDH 613.50943414129 1122.44489338159 321.31271583925 340.662853333208  
 1087.75682788799 1075.04105984319 4916.82166008511 1526.94101719128  
 3800.19142219719 1868.51164332659 976.566026758227 612.843402058384  
 PHIP 196.096147690942 171.623830248512 213.232693288132 240.11295387591  
 115.970093171058 292.433066791716 300.762511215441 384.727543700024  
 264.212242593461 593.345148568451 452.883337614277 377.221676837377  
 PHKA1 60.4593810615882 61.4800543360853 67.895735332714 51.223859150798  
 54.5683518971261 52.3187919317561 73.1654226019863 96.7474444319428  
 79.7061415085215 61.3529667465225 63.9029785089421 57.1441484662045  
 PHKA2 198.497745548245 342.643344197936 188.789206373516 169.322551237636  
 141.410183156424 114.769498252688 270.394857925086 220.398778650109  
 133.842824493862 297.475572902965 212.219384864571 168.91210897306  
 PHKB 107.391994714261 116.22441634196 170.184914156265 110.992997780544  
 78.258486366912 153.139323479953 97.1406120094484 99.0647786948132  
 122.099297248392 133.060894083935 139.164179214871 138.655669174533  
 PHKG1 46.6348258763289 43.1464706017434 45.310660704531 43.074472921841  
 41.2424637338424 50.2729836196996 43.1602899171656 46.1673159982664  
 44.3754281580557 42.6793753550854 44.2925355984056 47.0130468198828  
 PHKG2 106.917042272027 61.8492980174846 102.150058925164 81.0057400164851  
 138.292681458047 74.3729155936862 65.644767142472 130.878055585194  
 65.3672880026114 72.5153335566211 76.331185787832 70.5322939116406  
 PHLDA1 694.590958116425 805.87120346756 291.713831398096  
 772.368030410394 1254.72625904639 828.777886752805 743.463635670141

1485.68317899614 1086.12171444149 105.962195935529 96.0126406688619  
321.61848221455  
PHLDA2 93.4355842714864 72.7987593815919 79.7733480606334  
75.9099205260748 54.6820069269589 44.5544727111028 57.51482768194  
96.9880759408512 98.5609311953771 53.1993028936883 55.3942006156899  
54.1941919612524  
PHLDA3 156.976072444343 166.752205770965 238.205365476671  
70.0402992940342 100.443584075821 139.121494956408 84.4422623834916  
98.2074490157865 224.788507460682 309.293546994308 342.643344197936  
250.799060762208  
PHLDB1 406.668753694984 326.902009704746 274.809186311931  
239.117228656704 221.417189269038 376.215561392485 166.910579215196  
251.854446030066 150.374739898477 284.437758089699 298.367217540986  
225.760096749053  
PHLDB2 57.4376528157926 60.7942162859036 55.3122077514658  
54.2886483704949 47.0954207417646 106.418690759491 40.5585676679482  
46.5421017969405 71.8706847571669 87.2316853416374 81.4702220063796  
93.4726264307041  
PHLDB3 39.7576136507593 57.6831182451733 45.1569741609597  
40.5484717678957 45.2556760873335 42.2577689927563 41.1507980856436  
45.642304356051 46.6944238390932 46.5650556481721 42.911855821602  
52.2832912331043  
PHLPP 49.2595762436995 71.5726787111921 64.408176016319 50.378948785456  
50.7615314686244 46.574682061365 68.0157730844432 52.6960621424156  
98.5609311953771 128.616776019243 105.953705702398 88.6771566133367  
PHLPP1 65.8306182796781 50.3586212130973 51.6159542017038  
60.1837189855762 57.8039717833131 64.7905331739366 62.1970616836737  
61.9787117490846 55.7522234735038 59.2628513357357 52.5154971256566  
62.3997407955361  
PHOSPHO1 41.9407041937973 40.8880530359822 38.3166554965434  
46.4555908533915 40.4639532172338 41.2567470068038 46.3057385979341  
42.9301944191913 39.3750969348308 36.5806287103157 38.745552403895  
36.5474283500601  
PHOSPHO2 51.342502154612 56.0642694832108 55.3122077514658  
37.2559756339764 51.2525124735102 52.3746819771982 54.0170817319522  
46.0633179231318 49.3780606970538 41.6724739851995 51.7538628098347  
48.7226309877005  
PHOX2A 42.2455707947223 41.4508241771315 44.696023817801  
46.614092935749 44.6834648302383 40.5281496800812 44.6032218589199  
42.8482181313226 43.9450023643394 44.7958122466628 40.0766543123257  
39.2469742642337  
PHOX2B 37.2474303302343 39.6995529770239 37.7384958256497  
41.6045220683604 38.745552403895 38.0648056183784 38.977631784251  
41.3012916486748 43.0456011922275 38.2550371518309 41.5421429082231  
41.5132248356707  
PHPT1 516.349618186681 362.268767190535 232.77788697408 303.818507395434  
235.925374041038 474.267141780289 282.38663225575 169.18132209076  
285.12034141287 428.515605971056 380.736562250846 352.019218177371  
PHTF1 65.7587943905649 77.1737254584648 81.4931910857436 66.5921967967793  
82.1344514651393 55.8243694410835 75.287377665837 62.2982003555312  
76.1869593072029 52.0999467564713 65.342842101283 74.3442318693865  
PHTF2 46.263826584899 45.2556760873335 55.6865353018811 43.1847628331565  
46.9906120932727 47.6803619768589 44.6032218589199 38.5457716679071  
47.0804681460898 37.8217989841918 44.2925355984056 51.2318935933116

PHYH 136.250317107253 122.738749904222 163.809567262808 124.611407530723  
155.888873407786 210.73006676203 267.024267633341 219.555240189863  
211.701234819986 155.174579191838 135.080816177012 156.174166381986  
PHYHD1 40.4639532172338 40.4359177791566 47.646800205189  
41.5464765641928 42.7107928951766 64.6835308827804 43.3262148375525  
45.642304356051 37.9273653326866 64.8549209064366 68.3157692917711  
53.0446815750355  
PHYHIP 49.540449125788 47.6229101519945 49.4573631027613  
48.856176220627 59.6922302604696 56.4819802857598 49.3854238365325  
51.4360013601805 54.8946088631931 88.5601339449828 57.8111054584154  
61.1022920882065  
PHYHIPL 40.9558083259517 39.6995529770239 46.9040704638073  
43.074472921841 44.3557408297309 42.0574848021044 44.0687697278114  
40.931294690669 42.2577689927563 38.745552403895 37.5583886316038  
40.0557788909923  
PI15 50.8875036861067 47.4076235350059 45.7452456977857 115.221134337342  
52.7288095750893 76.889690218685 45.2830225385602 50.1833483241864  
56.284748518655 47.611018474151 45.2265319826548 47.8431972374582  
PI16 45.0985088502363 45.2556760873335 42.8270038153139 47.2009420656854  
45.6895223823001 2160.22713775462 42.2577689927563 54.5125550937898  
44.7058233759912 1928.53890809223 1221.31634960736 1541.9572099378  
PI3 949.923102632043 156.061711961514 367.685570437603 2300.20602168385  
76.8964050504238 65.9014252111112 550.100918659768 89.5130163419167  
65.4784797364469 39.8873706855774 40.3452320167286 31.6419446793642  
PI4K2A 59.5000730792772 66.8693882433359 51.8122261766744  
89.4504034432321 59.6922302604696 47.2927436772465 47.5963750520409  
60.9009676344258 61.8824218975538 51.8412522234186 49.7363778831003  
67.3183506012892  
PI4K2B 63.7818442618767 94.4501786945034 100.891869710611  
98.8296358083144 67.40251451399 77.084581342367 93.1067450332473  
79.1432909353319 107.466490458133 83.3729277601518 87.0972426452686  
84.1030588938732  
PI4KAP1 93.4355842714864 241.08817915181 71.0340758556049  
65.084620579901 193.897678586782 99.6288131333575 100.829511546674  
81.2850357499192 94.1050519074545 48.8623729374733 47.6125796208753  
66.3944891131864  
PI4KAP2 286.832539203237 821.922096305069 179.897685693038  
176.27162536342 617.271611375695 212.712025285843 319.248898194029  
280.820745089796 227.439319520245 147.945429978177 147.151416108234  
113.853553531089  
PI4KB 218.552143403657 272.198774144152 329.763197973922 167.848222139162  
280.446302631438 209.467874193952 239.023368693467 575.863848923457  
190.703466372947 240.476103976894 243.217623613383 188.928047145068  
PIAS1 154.509548705054 151.795609904857 129.091447141381 299.334388262225  
154.355197155161 287.059183013009 170.150808455621 189.788255380723  
157.979422616649 196.200780398883 240.55212989103 212.803471204964  
PIAS2 53.4921736109774 54.9821263631962 58.4476706144086 51.7739270955254  
55.2114969675545 59.9876575158981 56.9320717885002 66.6951654336154  
78.7825895852659 51.3907321092333 51.6414075056938 54.5389479640568  
PIAS3 76.1969626204894 64.3312319756553 146.658116519622 54.6089451252049  
89.1012752492647 74.5405407002217 66.5422130374814 76.7710944291287  
102.771611905219 107.242476674629 95.1818735488388 90.0223113095186

|        |                  |                  |                  |                  |
|--------|------------------|------------------|------------------|------------------|
| PIAS4  | 220.682149473323 | 286.68367978144  | 277.5073518536   | 226.567000755017 |
|        | 514.70012608304  | 235.195902632101 | 330.946598275585 | 261.081844108932 |
|        | 252.949225605064 | 187.750540261531 | 222.126944340681 | 175.378964448101 |
| PIB5PA | 44.1294459089314 | 50.4022543872993 | 54.9944485073259 |                  |
|        | 44.8784374362948 | 54.2683296643972 | 41.4508241771315 | 51.2417443769676 |
|        | 52.0042367882776 | 69.2685201884906 | 52.6879797806876 | 61.3733228199803 |
|        | 45.6233434183356 |                  |                  |                  |
| PIBF1  | 50.6855356124139 | 53.2282811950376 | 52.1636737767351 | 49.9014504704021 |
|        | 47.7508139534968 | 60.1685144469519 | 48.9088046212958 | 48.6010563649534 |
|        | 63.9160790665236 | 67.1278109419819 | 62.8050945727712 | 66.7008819035152 |
| PICALM | 196.592478823849 | 148.3842032507   | 183.746651924774 |                  |
|        | 327.680540922377 | 167.999042735556 | 212.032445918948 | 137.860861723489 |
|        | 158.321459945365 | 137.509582795609 | 121.8863522969   | 163.476051754305 |
|        | 226.882600557693 |                  |                  |                  |
| PICK1  | 208.22938545273  | 148.144200968432 | 157.463465828715 | 76.9373289454707 |
|        | 172.929453277107 | 100.151116279734 | 206.514263103112 | 167.47269732721  |
|        | 105.969617813287 | 163.931827466775 | 170.619111196551 | 132.107655569343 |
| PID1   | 65.4561038762234 | 59.1938299291358 | 41.528370959196  | 123.729687262037 |
|        | 70.6903168772326 | 303.670126704469 | 42.1607322031054 | 53.6210959113222 |
|        | 43.3744503319109 | 163.931827466775 | 154.811704749343 | 134.024691118762 |
| PIF1   | 60.562215295948  | 71.5726787111921 | 53.8724557170772 | 63.7909104347097 |
|        | 102.282066142307 | 50.8533737532786 | 83.2162112994735 | 61.8665316900291 |
|        | 59.9770720847728 | 37.5343260962758 | 44.2925355984056 | 46.5650556481721 |
| PIGA   | 95.2996468986128 | 168.67163443217  | 111.304424389891 | 161.603201688692 |
|        | 90.8109585999257 | 97.1131393750315 | 183.887843429281 | 313.233036704221 |
|        | 139.121494956408 | 112.113501370522 | 97.6326743942878 | 127.949712300256 |
| PIGB   | 81.1350396749303 | 147.209004629384 | 95.913238814854  | 97.4967204298499 |
|        | 133.38594323309  | 85.6038071277319 | 87.455991111513  | 75.2101993995344 |
|        | 138.036631806718 | 80.2774079897733 | 91.2681347227088 | 123.536432289877 |
| PIGC   | 273.934014944673 | 166.097017297742 | 213.520663841371 | 143.031555728753 |
|        | 294.7772562683   | 139.022985518859 | 178.904972763325 | 121.650910373947 |
|        | 193.951097560903 | 159.76714232068  | 174.51485168044  | 186.64040927334  |
| PIGF   | 128.157032116902 | 163.788056447509 | 185.94424664238  | 93.691983111538  |
|        | 109.545589048507 | 86.1633564934019 | 102.220824629896 | 156.719353642505 |
|        | 159.506157112627 | 96.9051967257119 | 129.592927998658 | 202.529846569324 |
| PIGG   | 64.9367707455078 | 89.0203733091224 | 63.7744603935682 | 80.0042268333735 |
|        | 67.1278109419819 | 57.6034762511847 | 75.4053820110486 | 63.287067794195  |
|        | 87.036020750455  | 85.5439309325541 | 85.1114448808779 | 79.3875629814087 |
| PIGH   | 68.5457752893587 | 70.6467150815052 | 83.955786676926  | 62.1776700757427 |
|        | 78.7320333941149 | 90.7101037998119 | 64.5722284870633 | 48.272324215504  |
|        | 84.9075858560758 | 59.8130420783374 | 67.6271456814495 | 96.6957892186886 |
| PIGK   | 87.1735705257803 | 63.6287257620165 | 65.7670524353661 | 80.5537984388921 |
|        | 64.9072331703985 | 99.2749350936362 | 50.2016912396771 | 64.120219344545  |
|        | 50.9010149857308 | 56.4553747079294 | 72.1090339831747 | 79.1209792219434 |
| PIGL   | 47.1962846565261 | 57.0082102559228 | 65.1185966859561 | 47.9915414951747 |
|        | 113.747633871556 | 51.702461863489  | 56.3376046940285 | 54.8412943008635 |
|        | 52.1788489555942 | 52.4351670989268 | 50.0303076717704 | 49.3087627580849 |
| PIGM   | 58.0139597055449 | 72.0792554308917 | 90.3485862002091 | 55.2214187655851 |
|        | 94.8408264309872 | 44.3648993568405 | 66.5422130374814 | 73.2037966614621 |
|        | 153.940127525369 | 78.9420136903401 | 77.7714622826402 | 68.6047087267554 |
| PIGN   | 106.10668428032  | 119.808125185521 | 167.626012561905 | 120.92335773864  |
|        | 90.385018479478  | 95.5325488969517 | 107.54932544455  | 76.5339970774168 |
|        | 213.830284761604 | 167.49597550111  | 149.076166432567 | 155.225701588645 |

|         |                  |                  |                  |                  |
|---------|------------------|------------------|------------------|------------------|
| PIGO    | 85.1950626054282 | 100.168016285684 | 70.0697974278875 | 60.7741670229412 |
|         | 84.3589195870713 | 61.8757975011721 | 93.6717518147993 | 99.4184778430267 |
|         | 90.4402629353785 | 82.291097567232  | 80.0381580139229 | 84.5829208578248 |
| PIGP    | 108.022329297132 | 209.438270055157 | 322.774093041134 | 163.844659359002 |
|         | 293.258858033133 | 277.665554240228 | 181.705809767061 | 135.41852974791  |
|         | 194.355765743782 | 149.386774957393 | 145.847014515246 | 248.527031538874 |
| PIGQ    | 172.381808887528 | 130.720191554964 | 179.378838766172 | 97.2220312216969 |
|         | 164.813928846511 | 100.423344358771 | 154.019005732316 | 128.827672077002 |
|         | 177.379924616924 | 147.444007777385 | 195.063474879275 | 107.087870999702 |
| PIGR    | 41.5421429082231 | 63.2804984998739 | 111.735319884512 | 46.4555908533915 |
|         | 41.467005949568  | 42.157627240486  | 380.988918630713 | 48.1591264215184 |
|         | 108.654797121478 | 46.7646877499666 | 104.715234047628 | 48.27609330316   |
| PIGS    | 117.282216847547 | 116.51037006692  | 137.955007835039 | 105.45765455249  |
|         | 125.052841200703 | 94.5644670313964 | 127.811684080184 | 136.913434348036 |
|         | 156.56745342836  | 114.321083441061 | 118.251739134889 | 129.091447141381 |
| PIGT    | 314.924656469102 | 357.254500791202 | 416.717470974721 | 281.527450183603 |
|         | 424.539111965342 | 411.047310950296 | 338.415128695208 | 264.212242593461 |
|         | 589.685739519627 | 317.245171206724 | 345.876877384089 | 291.64206171681  |
| PIGU    | 160.134344197725 | 144.835567449189 | 126.826715174564 | 94.3229189690855 |
|         | 158.57392852619  | 102.711934290382 | 281.452208033175 | 190.61997068475  |
|         | 192.700843009002 | 163.860910729725 | 210.768576894328 | 137.897231677665 |
| PIGV    | 97.9401338178996 | 87.5666652975503 | 98.3798838151482 | 90.8188865732032 |
|         | 88.1199908664065 | 88.3503153240018 | 93.0538726751588 | 104.351256270039 |
|         | 106.590506599473 | 196.735144093998 | 149.933827818309 | 139.731620245421 |
| PIGW    | 56.921728372453  | 79.9567256807679 | 66.5285423077808 | 51.7739270955254 |
|         | 74.3523005665671 | 45.2852528185486 | 59.5205055437765 | 53.6782125131958 |
|         | 91.3362264594431 | 46.0119912782855 | 50.9815930710768 | 48.27609330316   |
| PIGX    | 51.6558970571712 | 39.3999056968598 | 49.3000844711116 | 50.378948785456  |
|         | 60.6400800519777 | 56.3525213736952 | 58.2315917325629 | 73.746472097049  |
|         | 52.5772854102326 | 82.6036671634626 | 84.2960453806012 | 74.6734358603424 |
| PIGY    | 445.760104546268 | 761.341795853104 | 442.380936516984 | 428.729935028911 |
|         | 1151.25293766167 | 1027.59400018637 | 390.978292094212 | 255.483653108786 |
|         | 647.297964303385 | 313.046160403661 | 454.402224020514 | 613.27814206548  |
| PIGZ    | 56.2508140932179 | 70.5699797830702 | 60.3973027611091 | 49.5424425850549 |
|         | 48.3814421939888 | 53.8461734834857 | 72.5956443098684 | 55.421880601441  |
|         | 82.3364971911816 | 129.213574379351 | 80.2381651206227 | 127.811684080184 |
| PIH1D1  | 121.936597605894 | 157.121355906194 | 188.670053901101 |                  |
|         | 146.983805232769 | 278.507764368929 | 228.469654751393 | 176.224645007435 |
|         | 122.621100838222 | 194.046072415847 | 160.973602503707 | 146.483908799607 |
|         | 147.137598111239 |                  |                  |                  |
| PIH1D2  | 37.4554876386402 | 41.3610369241157 | 41.0356368374708 |                  |
|         | 37.29566077996   | 45.2556760873335 | 39.0266821712099 | 38.0598374201407 |
|         | 34.806104801006  | 38.2215591930186 | 39.4710743516517 | 38.4689132737495 |
|         | 36.449101775775  |                  |                  |                  |
| PIK3AP1 | 41.7397731376692 | 42.4493032770053 | 38.7745734037492 |                  |
|         | 95.6215575902122 | 39.1650142708257 | 39.4953494583071 | 38.5066108855005 |
|         | 38.5457716679071 | 35.4332080966594 | 35.195364621675  | 39.9899430628542 |
|         | 38.4330755397458 |                  |                  |                  |
| PIK3C2A | 41.8409927585705 | 58.1027665533767 | 57.6371756925687 |                  |
|         | 43.4410741327254 | 52.8190882379316 | 66.6320017520888 | 42.8684958525042 |
|         | 44.797320243931  | 53.2046867327331 | 39.1621898366355 | 50.0808824383821 |
|         | 55.3563533836982 |                  |                  |                  |
| PIK3C2B | 243.640796499438 | 435.325038193179 | 363.002913525646 |                  |
|         | 94.7283425282671 | 274.259417498569 | 118.089250727398 | 176.07173250529  |

323.048740324895 283.30253361072 295.848968688724 207.957319374194  
254.519518210024  
PIK3C2G 44.2350046179299 40.6380495994768 35.4484652445078  
37.29566077996 38.5512429290626 35.314469458379 37.3799542961839  
35.6825474397235 37.9273653326866 33.9967481174035 35.9563099719284  
33.3192849177028  
PIK3C3 51.7607563002005 46.0713306971594 44.7829632472754  
36.890925044696 42.7982502551634 46.8954576545929 43.0930293831497  
51.1694248620208 49.3780606970538 50.7855742231932 47.299647867533  
51.8562635270111  
PIK3CA 41.5668884168669 44.5152708955623 39.2707964550441  
43.8002456102021 49.7526478730976 48.6621527194963 38.4456289125816  
41.9315419791594 42.0621425894624 44.6918600441328 44.1148826235374  
51.3872161199373  
PIK3CB 45.7356815244513 53.1278271804774 64.9072331703985  
76.6232527679845 67.8233625051884 55.6242009731278 40.3302268293707  
44.797320243931 82.3364971911816 46.5650556481721 55.5567699051046  
70.5322939116406  
PIK3CD 56.5094373275922 67.0402749076279 68.0649030501515  
160.056757080676 46.8674366115656 66.2167164788023 54.0170817319522  
72.3822545261582 48.6494451061637 61.4569050766419 54.5711704180349  
56.361708620372  
PIK3CG 40.4639532172338 50.1027491117756 44.1452943804044  
84.0899854321388 39.6535880152834 44.4619248757502 42.1607322031054  
46.8954576545929 48.3119523820103 45.6868589181768 44.2925355984056  
38.3291713594599  
PIK3IP1 123.25443049561 257.325282051981 283.88971280023  
379.031536537372 128.38299874379 175.508659149068 244.707381127491  
323.295794446334 366.716775127375 693.056793637199 475.008345432596  
417.086922265732  
PIK3R1 74.5694657001572 73.252713742627 114.224091812993  
81.3173847262463 90.1830062843449 143.822560762049 79.2525964926483  
70.5699797830702 165.548537317115 126.578693258328 132.473918053428  
97.3443444704601  
PIK3R2 738.059797123491 1245.45371155527 1291.71781703042  
403.243939813779 1372.51401036753 559.296669575666 603.737787922337  
645.702744916884 1526.94101719128 1039.06999658544 746.847753035399  
546.94113683381  
PIK3R3 45.0985088502363 43.0971787292711 47.0940613507321  
43.8002456102021 40.3452320167286 48.3686935595826 39.8695929627783  
56.2441895183416 42.0621425894624 39.2623423164488 45.390192977585  
47.2131144508464  
PIK3R4 61.356483470053 77.3367966395554 73.6323065529916  
78.5141640924736 111.192247184712 74.4508307047509 67.6767845246581  
64.2174369755376 80.2112932898502 64.5347406608537 80.5508300225954  
75.2431285480772  
PIK3R5 34.8099089553046 48.109747794187 44.9758339877851  
93.7782490229256 38.3561682218911 40.244271403831 37.7136011474903  
42.5435283762933 40.5912213523345 46.441301934328 39.6403089864678  
38.6454098044474  
PIK4CA 144.348025939706 215.557210899786 130.848965290163  
150.405742308999 170.720099897973 156.259762538052 131.955454394903  
201.764909400617 166.349012388957 140.41738844565 144.250839367023  
136.657213529097

PILRA 85.7390214986603 59.8760452220989 69.0503036666628 477.023373302787  
56.5933259268408 75.8701918184611 102.294142438313 69.6097529955737  
45.8325181856483 64.1097859982912 57.115361349315 59.5534127075228  
PILRB 95.9298109273155 103.43536623122 133.344625514809 59.897987870592  
165.867229890877 79.1432909353319 70.5992463788381 106.035435807364  
83.8113149043718 136.377736482671 105.317399386109 87.248511264058  
PIM1 774.8306350567 899.223276238109 279.063292799015 485.310097523194  
633.819901764391 773.781266760336 858.975085087497 676.672146226382  
802.036670929858 595.790464730847 861.427193617946 1102.03940742413  
PIM2 97.8141040140486 309.593721653575 248.563278344035 644.150427468718  
90.9521112485099 91.8295472317386 148.770228614661 133.453860783605  
103.934830132715 86.0832675838966 71.0369238830779 72.8817990031077  
PIM3 91.6826894933058 94.2678678253657 144.348025939706 143.053774297331  
87.5074297754031 66.5921967967793 95.0604882262201 272.315378390681  
94.6130003107132 144.835567449189 131.216899549608 101.572081177165  
PIN1 582.511224532378 744.762787024945 775.723255259499 672.515393219419  
1157.65264077595 1051.58050264114 746.847753035399 679.810781641519  
650.328627263899 731.670315613547 838.974043046676 625.805967352327  
PIN4 62.7669079605627 60.9311907846259 64.408176016319 57.2856683017619  
54.5683518971261 60.2867996701867 73.3042538589134 60.6706478075023  
65.3672880026114 80.3915591207869 68.2485577757544 69.3483108270756  
PINK1 70.6065558064758 95.0738959950301 107.034189847828 86.0630164348952  
57.4163094213712 189.035121001539 82.5050369860039 106.917042272027  
103.423003544792 109.654559065946 111.760213205992 110.453662843674  
PINX1 60.9710783023013 58.3164247463092 70.0059240383657 80.4967881959046  
73.746472097049 84.4821163646146 93.9472621843566 61.62834757456  
74.3394153125605 68.6788460999238 68.8344810972689 67.1675878355908  
PIP 48.4849194706125 43.0227387991135 41.0356368374708 61.5515639412892  
35.5220586859301 41.2567470068038 40.5585676679482 43.4544762830742  
112.900479809091 34.7308008643142 42.2618615571566 46.0633179231318  
PIP3-E 37.7384958256497 45.4143854024453 45.8844325913247  
37.5382094267692 38.4540849632254 44.7804080899431 51.4349390827895  
38.4540849632254 40.3316153483289 37.8217989841918 39.8184668132023  
40.7704587752083  
PIP4K2B 50.6855356124139 46.0323106800336 58.7783310649709  
45.505885458784 57.1187536733236 44.2607789091176 47.5130990528612  
48.1591264215184 51.3084273211359 43.9783383422823 46.8954576545929  
40.4639532172338  
PIP4K2C 97.2535496140648 89.9340376539354 109.979856686854  
63.0153175111747 98.4847140916184 54.2503023961401 69.1414574152997  
119.474339360208 118.696127260286 73.1407519625966 74.3766944386886  
78.9701459806641  
PIP5K1A 50.2203578628217 44.6918600441328 49.5424425850549  
43.9282059368202 56.1186281675573 40.3357777530419 42.9803717121865  
63.3768687067745 44.2607789091176 45.3530683538086 47.299647867533  
49.904979214379  
PIP5K1B 42.8482181313226 42.4493032770053 45.1912496459517  
51.4968903591058 42.5534565507139 38.7537364570873 41.4244721780607  
39.853866204927 45.7911932481722 39.3957535885631 40.8730692351493  
41.6972107715212  
PIP5K1C 321.686871145301 161.65846687852 213.768352764473  
260.698359835873 236.10027586633 326.500804513133 151.451107406752  
269.745248423773 178.4681248137 287.247399926139 368.793978305607  
248.058310353348

PIP5K2A 60.0793579902362 55.8046062733709 63.2475738480323  
149.916892729626 52.0583273941813 64.5187138759372 53.4921736109774  
66.295597720304 51.6731332961917 50.7855742231932 55.3942006156899  
51.7833333848627

PIP5K2B 898.668526777346 355.821515437298 455.898996745515  
638.848775860866 347.486523804413 293.944796522337 726.42773300581  
1642.75555340648 327.108892199594 1094.91235708087 1154.6386362  
928.230419226078

PIP5K3 42.7542287741471 41.3351256327455 40.0599807618105  
39.7981217001498 43.004943518025 39.5551556615516 41.7656868106485  
41.1575777497576 44.7699099047043 42.0217776707284 38.2795150354677  
41.0970259989281

PIP5KL1 50.7390160399184 52.5868047927666 54.1637401903523  
49.9014504704021 57.1935729219207 51.0506441018166 61.5000955267432  
55.421880601441 48.9931786790166 53.0357938671646 44.6286581923295  
53.840976437122

PIPOX 38.8561375693335 43.4396866157171 42.4580504587581 45.4634652319753  
39.859345745831 47.0027453663546 40.5585676679482 38.956280281655  
40.0403898620771 44.4652605017595 41.0050831223107 41.6550823405646

PIPSL 203.228211195516 257.584248252408 358.083401917765 209.705575423447  
374.723141438448 386.640440174303 326.357036514613 330.037433174255  
229.035497774884 111.399831013724 128.70380102034 160.100408020768

PIR 52.1788489555942 217.658421476562 77.8620267163666 47.2009420656854  
120.618530729822 96.6957892186886 420.401914084346 84.4349803529132  
233.635083076472 178.559242961756 166.208731611481 471.297503316471

PISD 118.27400376579 142.863673914134 137.831070407907 142.714450804595  
131.766252431636 108.168107241759 128.024853362102 98.4405692451144  
101.187156681366 124.362644216178 130.35828139117 130.946383858668

PITPNA 80.0113001016496 72.9051985681184 92.4350913779886  
113.783910320605 77.4769634299218 100.883604376864 78.8250642061439  
67.2714646016644 71.2787833369055 86.0832675838966 85.6989061660348  
90.8140983242733

PITPNB 126.10194284238 132.400225103653 173.800190134221  
136.236041346288 134.468276542607 308.568617575909 200.41782363596  
111.773296155783 138.81810375553 151.686513723244 138.486962379511  
160.442808769594

PITPNC1 83.374777060444 67.8999127712557 93.2402285327166  
98.9560329133205 88.2427413480277 90.0552783827917 86.0796981361148  
96.4072955983042 145.865118592916 76.6094442444074 98.6177995580785  
108.213380368446

PITPNM1 259.626847216881 581.2449195499 736.846933148564  
385.064309855006 519.775555680262 149.076166432567 351.764130340952  
327.238337722366 432.945510073269 173.891042920642 154.707548614663  
218.099774231575

PITPNM2 53.8856501960117 50.164201758929 56.939860285007  
188.533240079423 55.9283039581662 63.7818442618767 57.8870110456492  
51.8347877274018 39.853866204927 46.441301934328 49.9338905397767  
48.6795178347248

PITPNM3 36.8072833828297 38.7344853699576 35.2101597814352  
40.7481155008596 34.5301949364147 39.6251842352088 40.5585676679482  
39.853866204927 36.9060997041453 34.3674468322242 37.4642807402741  
38.0452862258803

PITRM1 271.008929897376 233.137958980552 233.692490031492  
170.184914156265 462.762837284748 275.314994786888 344.985739524681



|        |                  |                  |                  |                  |
|--------|------------------|------------------|------------------|------------------|
|        | 245.630020408551 | 439.955651727755 | 230.286815921497 | 300.845404774478 |
|        | 291.785618741057 |                  |                  |                  |
| PITX1  | 1137.99307039386 | 1339.29022988209 | 1096.1705171588  | 98.2447263268855 |
|        | 989.0602710707   | 2032.18819581205 | 76.6094442444074 | 447.348799009312 |
|        | 2506.05102956991 | 1087.75682788799 | 1364.06060391538 | 818.927157206447 |
| PITX2  | 49.2965344002582 | 42.6429245146738 | 44.014441886238  | 42.5321207892864 |
|        | 41.5377280911418 | 111.367789538268 | 58.4394991753791 | 43.1952484145183 |
|        | 43.0990926708606 | 60.9311907846259 | 72.6959688212342 | 57.6075177910677 |
| PITX3  | 42.9104454767916 | 43.0971787292711 | 38.5045333213784 | 35.6027791404152 |
|        | 41.467005949568  | 40.650742261428  | 44.4639405506967 | 36.8400213077707 |
|        | 43.5669306063196 | 41.1222709786153 | 36.5359455830388 | 44.8372404608604 |
| PIWIL1 | 44.0328992213727 | 44.1239711172417 | 41.6079958749402 |                  |
|        | 42.9358255168086 | 38.4540849632254 | 39.7394181011603 | 47.5963750520409 |
|        | 43.2551508830106 | 38.1169703906207 | 40.7063426028871 | 40.4504608195666 |
|        | 44.9070250604284 |                  |                  |                  |
| PIWIL2 | 40.9999112795884 | 41.6466169548846 | 41.0752399035779 |                  |
|        | 39.1706564265495 | 38.4540849632254 | 43.0860383229288 | 39.4859911554583 |
|        | 42.0930656891788 | 40.4544974307172 | 42.3346523186171 | 43.6629145624937 |
|        | 41.5083179498332 |                  |                  |                  |
| PIWIL3 | 35.5179217192467 | 40.148780650831  | 41.0356368374708 |                  |
|        | 34.4382958501338 | 39.2608760193011 | 45.0882356578404 | 42.4939802311136 |
|        | 41.5464765641928 | 43.5669306063196 | 37.920964499903  | 38.4689132737495 |
|        | 36.449101775775  |                  |                  |                  |
| PIWIL4 | 52.3660712483179 | 36.3517823215525 | 42.1901757067073 |                  |
|        | 46.546116650292  | 42.3685136297603 | 47.3375061488583 | 42.5660695551615 |
|        | 45.1151758109609 | 44.1211971585961 | 54.4825201506931 | 49.9338905397767 |
|        | 44.4067063477243 |                  |                  |                  |
| PJA1   | 82.5956705829173 | 108.847044476692 | 171.270750760376 | 73.252713742627  |
|        | 74.5758811681995 | 107.994880298791 | 123.978615472736 | 76.0709828871754 |
|        | 103.720371491639 | 57.4259236299197 | 69.4877749654481 | 93.299474822664  |
| PJA2   | 787.671342652389 | 57.0082102559228 | 606.481020597082 | 932.849256536912 |
|        | 273.849703944739 | 1501.67042548971 | 298.282957415786 | 581.093069802913 |
|        | 413.516548092483 | 1817.14004766564 | 1237.93130196998 | 1213.3477481374  |
| PJCG6  | 51.6558970571712 | 46.1569135229922 | 43.8495248991589 | 40.1804147506786 |
|        | 43.9450023643394 | 43.2805590023412 | 64.232967574797  | 61.130286531713  |
|        | 47.7086093893038 | 67.0163226819964 | 57.8111054584154 | 51.9447450229707 |
| PKD1   | 121.831344781285 | 71.1595608255838 | 93.9472621843566 | 76.450993090133  |
|        | 84.3464768820344 | 146.483908799607 | 58.9656737189764 | 62.9922928277769 |
|        | 66.4900180648559 | 110.334176022265 | 104.873452487222 | 79.172237641942  |
| PKD1L1 | 51.7607563002005 | 43.5873188565519 | 38.9790184198145 |                  |
|        | 42.8848887336829 | 44.7210190486327 | 46.9515828775339 | 44.5390641547628 |
|        | 45.3872406432794 | 41.134180463103  | 46.614092935749  | 45.3597029614942 |
|        | 43.0930293831497 |                  |                  |                  |
| PKD1L2 | 43.6706764143908 | 45.0905928998779 | 39.6705473876526 |                  |
|        | 40.4967168818294 | 40.7273974755431 | 43.4173515108896 | 40.3924370310446 |
|        | 39.2114264935239 | 41.2424637338424 | 42.0174645082585 | 43.7858612339862 |
|        | 41.193860915995  |                  |                  |                  |
| PKD1L3 | 37.6397652536077 | 39.7835513496873 | 41.6079958749402 |                  |
|        | 40.3180310664156 | 41.0885562160946 | 37.9951997351435 | 36.8369172900902 |
|        | 43.0390857698452 | 36.4476883897928 | 33.0508421547252 | 39.153226699662  |
|        | 45.0035308952466 |                  |                  |                  |
| PKD2   | 87.2394571967316 | 72.6162848018047 | 66.991625911443  | 111.438294720953 |
|        | 74.3523005665671 | 143.875527523263 | 63.6695826053997 | 103.010279797396 |
|        | 69.805066579191  | 110.048921728774 | 105.589475270494 | 143.112509176873 |

PKD2L1 40.2543341073001 43.9421822132391 43.6670755115848  
103.139459009593 35.0181575202066 38.6414316877471 34.9344532055397  
40.047314525032 34.6720534245631 38.528621456378 40.0766543123257  
38.2350720635382  
PKD2L2 41.3387790895716 46.29198852834 38.3166554965434  
44.9370339275041 39.1650142708257 42.357910063876 40.0052661202207  
45.4757965005055 40.6957787921451 43.4885245598939 37.1059647239814  
40.8681871019812  
PKDREJ 37.55264801907 37.5469247328848 41.528370959196  
36.7892997857376 41.0885562160946 38.2293008890613 38.5066108855005  
40.5158867964016 43.1805016690297 35.93950183586 37.9946685306274  
40.5703581862752  
PKHD1 42.0778399888414 62.3439114913889 54.5191471810265 39.0266821712099  
55.4452315601595 45.0882356578404 57.2008272301399 58.8328124383881  
51.1055541075029 57.8005007012205 52.1788489555942 52.2832912331043  
PKHD1L1 40.3478825593224 40.9731067463382 44.5134109184888  
46.7577982595088 42.1650127805175 46.1513019317765 37.1643693306382  
37.7612949798895 42.1594905198929 37.920964499903 46.4753015651202  
42.0424641526302  
PKIA 70.9419509323007 305.554059609771 152.078104394345 56.3441077510744  
141.611097024526 128.485596739193 99.3797043236938 84.3995736970187  
222.81957100654 121.023370640285 110.238734353354 132.87656143652  
PKIB 116.76301232629 62.4914906186314 73.4962349716902 63.6334154351075  
44.7210190486327 43.3785777889265 61.0468099710416 48.3077814647455  
49.7336769474446 45.3530683538086 42.3413611855132 43.2177497174408  
PKIG 40.4261913313642 45.1694246393676 42.640829914102 41.8347680672208  
41.467005949568 73.1841981188179 39.9620349773712 44.571915452417  
42.4540072551568 47.1629799536297 46.2137423681352 49.5143331736386  
PKLR 40.7609952437622 43.2073034915743 40.0478450549299 41.9455842688118  
43.4854211982037 39.1655788888905 41.1851507297631 41.2123118923748  
41.7264590002356 45.2931192655835 38.7344853699576 43.2351673579148  
PKM2 525.16535463798 322.109212713082 311.361885152025 492.902027204364  
246.869486382264 269.438510636306 379.280296622892 320.330057050615  
670.958499409833 551.915864019927 466.074595343541 526.750242877914  
PKMYT1 79.953657052127 81.9885333127488 79.6675791471526  
53.1124375923907 102.212684008752 44.5099734963815 105.945216149549  
63.4570909617664 114.719721626067 43.401782064778 44.4329005595031  
41.9083581529276  
PKN1 51.4749724393807 48.8807627138285 48.5460684639932 44.6024422254257  
45.7513446905309 61.4944752562671 61.781473363969 61.9787117490846  
47.5870162399764 52.0999467564713 61.9976238937207 49.6144181894187  
PKN2 53.3967242431461 50.2163892855092 49.8344973836834 48.856176220627  
36.3390947880186 48.9826868640753 58.8993834673475 57.1362071277099  
49.3780606970538 52.6879797806876 61.2529834995512 71.7408778060956  
PKN3 48.0201377454632 54.6793272901524 60.3973027611091 49.3654837541353  
65.0605897122361 48.9826868640753 86.9185256838836 50.1833483241864  
78.8968326770219 64.7269156363245 64.3824529624475 56.0477607422828  
PKNOX1 56.1538818251632 51.2066664465185 52.5353664902258  
58.1798515131249 55.0767527801658 69.64983895075 52.6510639680705  
53.5643281930979 49.7336769474446 66.9218519793499 59.9199304173784  
71.2491135258076  
PKNOX2 43.4626049853157 45.1694246393676 41.6079958749402  
43.6726153508978 42.1650127805175 53.6858208094027 37.9430145836712

44.797320243931 39.0775870687758 51.1169368198437 53.4088637045445  
 47.7962548556026  
 PKP1 41.0043775553254 55.8678615468603 91.3890908971311 45.9441733841041  
 51.3169658978959 43.6670755115848 69.1414574152997 48.0582855095143  
 54.3344262267094 89.2285288333749 58.1937489966884 74.3442318693865  
 PKP2 128.635811501506 58.2571968311834 49.6347864008749 61.0845101400379  
 60.2886873195135 42.357910063876 140.01041112896 59.3164315859919  
 128.391264770998 54.3554233228353 51.838002904753 83.0460206754856  
 PKP3 40.1925952773317 53.075017853806 60.0219418084008 37.8442841690502  
 40.3452320167286 42.0574848021044 42.4939802311136 41.5817737564592  
 61.0845101400379 38.1569957197319 41.4784106456949 42.8263096141654  
 PKP4 110.947379383048 149.59360999995 280.563427715895 133.365282773876  
 271.900886756161 181.531005915656 142.515628954457 120.286733441947  
 193.290018569713 185.264053754114 135.824520574227 189.398959817735  
 PLA1A 55.1306642449627 53.3683962805281 62.0008474085033 74.2429851177794  
 43.6587492470348 42.157627240486 42.629412460409 52.5098795466615  
 43.0930293831497 38.2069499294002 44.0409178714232 50.4847465816184  
 PLA2G10 93.5982028088194 125.794379028627 530.853153115366  
 45.4634652319753 47.4548471240051 38.9378717994178 52.7002314230604  
 75.2101993995344 335.943994595615 179.214713709599 182.188883821722  
 138.070735985503  
 PLA2G12A 40.4639532172338 49.6841415268611 48.6037684272115  
 42.0102671859606 45.8051846088552 47.5733603903505 44.4639405506967  
 45.9604707098953 49.5539622682049 42.5664883002833 44.7114813656401  
 45.4799270968969  
 PLA2G12B 43.3638918705225 40.148780650831 50.7502704822135  
 45.4634652319753 36.9060997041453 40.5281496800812 41.8315602975157  
 31.5151915411476 39.853866204927 42.785429206422 43.4709415392696  
 43.8575940017119  
 PLA2G15 120.837993273922 66.5864907685351 89.8354888041611  
 89.2503940049313 79.1039287828151 58.7404123614695 90.2915974511786  
 122.143519601825 65.7321440516177 84.0691608193405 63.7598547294225  
 74.8170892324966  
 PLA2G1B 39.4710743516517 41.9894412416874 47.7737810047679  
 40.8681871019812 43.844855336215 41.0582900711341 39.1539892144371  
 36.0306975524309 45.2897806651929 35.4990901121893 42.357910063876  
 39.6352613956998  
 PLA2G2A 160.962078065068 498.958550919515 117.556281726503  
 46.0228732507872 44.8897737954573 709.730555484551 46.0228732507872  
 47.0940613507321 47.3791873993182 1173.47285626656 75.4732674021193  
 1561.83892117664  
 PLA2G2D 120.73773749436 87.2351169088172 79.1257499539205  
 111.522812019895 80.675913085168 62.9688525319822 116.434267173815  
 232.628747594691 101.103458852775 197.205643078662 161.573327074375  
 144.034489386072  
 PLA2G2E 39.3709357615493 38.6414316877471 38.6727842796202  
 38.5252456306656 43.7517118200398 40.3357777530419 38.8417151851134  
 40.7311497914871 36.197424053556 39.9948390976317 46.0095710163378  
 42.9887069977696  
 PLA2G2F 261.260859494893 161.326580647514 72.4202724008052  
 42.5664883002833 40.2449343247539 40.5281496800812 71.0369238830779  
 102.626604917608 72.8653205184014 111.607814098243 87.2316853416374  
 57.5372732453319

PLA2G3 39.6609238036815 43.0971787292711 41.785676764591  
50.378948785456 44.9936360641969 40.3357777530419 45.1017494688414  
43.2551508830106 150.925721934159 38.957687788868 38.1835938174625  
41.1554481567603  
PLA2G4A 45.1912496459517 48.5905518770847 60.9621846036092  
45.1944222548351 55.0031529299037 57.013135787334 51.7714254834195  
41.5464765641928 48.7358147030082 57.0581769379589 52.8489752025797  
81.3082994649699  
PLA2G4B 144.063191647372 676.672146226382 308.025419469334  
136.891616331257 367.451332073134 130.865421554474 241.08817915181  
180.288784077653 176.991120397205 505.911881145656 467.884559162462  
521.874349042344  
PLA2G4C 101.002303802745 83.2873728545705 92.5325708931031  
175.271140689255 52.4370718282084 162.37682406314 45.6042625176633  
67.9103729751746 41.4636047919453 91.2715671868725 118.720812623965  
74.9294208313176  
PLA2G4D 45.7356815244513 42.2900457798748 40.7620472083159  
40.4359177791566 41.0885562160946 43.6427759607073 43.6753843488695  
41.7419877611072 46.7760357462635 40.1613888954735 38.4689132737495  
44.1063440402552  
PLA2G4E 42.3620028137457 45.2098033805679 44.1452943804044  
42.0621425894624 41.4397539024976 40.5281496800812 47.8947595316832  
38.9271399577966 41.4397539024976 41.7932258301997 44.4329005595031  
42.357910063876  
PLA2G4F 53.2046867327331 135.592113666246 195.543760781509  
49.3654837541353 96.6128615107975 44.4619248757502 62.0404348860702  
112.122619608668 118.93749473833 175.028390974125 209.705575423447  
82.4362183543935  
PLA2G5 55.6268253440479 38.0226905622357 39.991353369336  
40.3180310664156 37.956732373465 80.099836448859 39.0458123429605  
36.0306975524309 40.7847110517594 66.274247400793 52.7817052791259  
62.7669079605627  
PLA2G6 47.4678477186801 45.5587966941116 44.9758339877851  
43.367124590178 40.4166536885831 45.889677919201 42.9803717121865  
43.9604529016594 46.6491671626143 43.6033221838149 46.5308571957384  
48.9944486068347  
PLA2G7 183.469819903584 131.537639104397 88.5706300816555  
1106.57048989685 125.27802197261 57.3797835448761 114.526825145076  
152.920586451578 83.4465817617201 38.2069499294002 43.9450023643394  
57.445796273665  
PLA2R1 45.4799270968969 54.2746621762462 55.6865353018811  
46.0228732507872 43.9450023643394 50.8533737532786 51.3064929551674  
40.9861485852278 50.4511067853644 54.3554233228353 57.4078217542368  
69.4383198054368  
PLAA 49.9791966667317 46.2625470410195 45.2606665758581 45.334106390212  
47.8790369678629 44.3648993568405 49.2007061544241 44.1702105889066  
48.0563448184655 46.824299585607 45.1735152121056 48.8224716487571  
PLAC1 41.8409927585705 44.9370339275041 368.660803187338 45.7397504535169  
117.260454792593 43.5752393599169 38.5066108855005 35.7973685350741  
228.703786640132 41.9666541498638 33.2774014136617 43.0930293831497  
PLAC1L 42.0532901689036 41.8848959280916 42.8270038153139  
42.9358255168086 30.6242215267208 41.159706131351 44.0687697278114  
39.6474008369935 37.6383530120621 35.93950183586 38.8507804383261  
42.7782216342806

|         |                  |                  |                  |                  |
|---------|------------------|------------------|------------------|------------------|
| PLAC2   | 55.3153799233744 | 55.2182004838121 | 70.4794854241035 | 51.7739270955254 |
|         | 65.0605897122361 | 69.5645254789371 | 75.5830548489892 | 57.037639245179  |
|         | 57.2716485658185 | 58.7198210787055 | 55.3942006156899 | 53.9431600945419 |
| PLAC4   | 40.148780650831  | 41.3610369241157 | 40.301483914446  | 41.0726336841311 |
|         | 38.1644569189523 | 40.3357777530419 | 39.8695929627783 | 41.8417024632349 |
|         | 35.6970528713709 | 40.2112371512838 | 40.547835538778  | 35.2448979801094 |
| PLAC8   | 905.76958446454  | 172.574996256912 | 79.6133633483649 | 182.721628571674 |
|         | 46.9058511192313 | 52.7920121594624 | 69.7242825662275 | 75.656434170689  |
|         | 51.2423106372758 | 44.7520317855773 | 50.7159667633757 | 73.4876346170053 |
| PLAC8L1 | 56.921728372453  | 41.8073910693411 | 40.931294690669  |                  |
|         | 40.1804147506786 | 46.7508829977587 | 38.7340969861754 | 43.4544762830742 |
|         | 55.6904617926772 | 39.0775870687758 | 44.1379638573455 | 40.1742127891824 |
|         | 44.8372404608604 |                  |                  |                  |
| PLAC9   | 96.6833301748676 | 69.640968387662  | 66.0411740221276 | 90.5216273844682 |
|         | 61.4366256816323 | 1649.78627644882 | 59.6780848951767 | 103.631449539809 |
|         | 43.6670755115848 | 1029.12917222294 | 421.279008280368 | 330.241189572237 |
| PLAG1   | 47.9175508887533 | 45.4143854024453 | 51.6558970571712 | 44.7980740332174 |
|         | 46.0566822875389 | 44.1386689648017 | 41.1742244762318 | 39.9576138799997 |
|         | 53.4604353973381 | 62.5388689809398 | 47.1156565209607 | 54.9305217620873 |
| PLAGL1  | 52.2236479204029 | 47.5870162399764 | 44.5544727111028 |                  |
|         | 58.8224410806741 | 54.9249759425252 | 53.1491634301682 | 54.7105548454293 |
|         | 45.9104478407175 | 43.8482802038826 | 51.9547984751408 | 50.2016912396771 |
|         | 55.9283039581662 |                  |                  |                  |
| PLAGL2  | 155.633918471987 | 141.370796803908 | 143.251956814524 |                  |
|         | 165.820230766206 | 219.64979849407  | 101.693848821246 | 179.342338803631 |
|         | 94.3773551105819 | 155.435700005184 | 148.570371099987 | 117.439175394651 |
|         | 114.142157259903 |                  |                  |                  |
| PLAT    | 268.309382865636 | 258.120500906788 | 217.322595454018 | 233.539376791695 |
|         | 940.781370938596 | 820.580307716353 | 1093.04440713629 | 404.175196605897 |
|         | 1237.93130196998 | 385.594118191769 | 634.782261466407 | 306.487935692954 |
| PLAU    | 830.295872113419 | 295.194516063502 | 661.269882993465 | 922.047328788961 |
|         | 596.84269596976  | 141.364814429951 | 240.265816943765 | 657.310970474676 |
|         | 619.950241162173 | 186.759757179509 | 128.873145026756 | 253.764071470001 |
| PLAUR   | 253.072560237983 | 83.5791586743002 | 120.401643722713 | 1910.5347560855  |
|         | 118.20465458754  | 114.224091812993 | 289.332274319357 | 144.771861156788 |
|         | 100.774098314706 | 46.6598879466655 | 44.8872784170036 | 57.290967307936  |
| PLB1    | 43.1805016690297 | 50.3586212130973 | 63.7744603935682 | 43.3078542962968 |
|         | 44.9936360641969 | 47.7556758818053 | 46.3057385979341 | 43.0390857698452 |
|         | 43.4656637536244 | 47.8207974930031 | 44.1148826235374 | 39.7411455670172 |
| PLCB1   | 58.0688807932    | 69.0663624160288 | 64.6446465846487 | 45.7397504535169 |
|         | 52.0583273941813 | 68.4323624797175 | 62.6885730386156 | 51.7121586468362 |
|         | 57.1401776589964 | 83.3729277601518 | 77.523734787944  | 80.2456257165272 |
| PLCB2   | 70.7238101239421 | 85.6763929745253 | 74.5886835786452 | 204.089652936303 |
|         | 46.3150221024046 | 71.1607965028029 | 61.6544855697851 | 86.3237770387663 |
|         | 44.619512785899  | 50.3388505346542 | 53.0177144132449 | 47.7962548556026 |
| PLCB3   | 44.0328992213727 | 44.2630383225933 | 48.2883694323339 | 49.9014504704021 |
|         | 45.4751076037511 | 49.641159251878  | 42.629412460409  | 42.157627240486  |
|         | 49.641159251878  | 42.9866214102525 | 47.0940613507321 | 43.7672102682067 |
| PLCB4   | 42.466333667839  | 44.5884811528117 | 46.4569566520107 | 47.5733603903505 |
|         | 48.0234896130991 | 63.9650465690339 | 43.9450023643394 | 40.047314525032  |
|         | 46.824299585607  | 48.3077814647455 | 48.2050207071554 | 44.5432192783161 |
| PLCD1   | 77.3752541676627 | 172.65049903872  | 211.685526927495 | 71.2572485987604 |
|         | 232.847812981531 | 104.587564056763 | 310.120875196999 | 102.49785018292  |
|         | 242.58992925232  | 358.498678171092 | 238.338646661062 | 147.735538100363 |

|        |                  |                  |                  |                  |
|--------|------------------|------------------|------------------|------------------|
| PLCD3  | 49.4151347850687 | 187.347386400244 | 164.435300801872 | 33.4819739460148 |
|        | 48.9627346956003 | 41.6590564937735 | 40.2154497375715 | 48.6441988290952 |
|        | 120.401643722713 | 115.235144612428 | 84.7058085717914 | 110.947379383048 |
| PLCD4  | 41.6354649482853 | 42.5269793679335 | 41.1367478979484 | 38.9534635879195 |
|        | 39.6535880152834 | 105.036862798568 | 49.540449125788  | 46.695848687694  |
|        | 42.0621425894624 | 86.0832675838966 | 64.7598303406649 | 45.5800840647989 |
| PLCE1  | 53.2046867327331 | 162.721587349434 | 65.3531590366085 | 39.3750969348308 |
|        | 57.8039717833131 | 46.263826584899  | 68.7753456118815 | 122.621100838222 |
|        | 54.5952754712007 | 110.334176022265 | 77.3999378505514 | 116.685453817071 |
| PLCG1  | 118.664567031144 | 96.342767783298  | 85.5135159896819 | 66.5010880718463 |
|        | 108.868692628326 | 96.3976093220249 | 119.681745926474 | 106.049736669661 |
|        | 102.282066142307 | 96.4509532728415 | 114.719721626067 | 73.9986015964321 |
| PLCG2  | 122.136867360309 | 277.588692595406 | 400.760646547012 | 673.522667186915 |
|        | 98.3126451737573 | 187.422036538629 | 166.33117014492  | 252.487015579489 |
|        | 81.6508259258669 | 197.040881690021 | 190.053043382767 | 293.217518524507 |
| PLCH1  | 46.0920218698606 | 50.3586212130973 | 33.8558232866797 | 42.2496337895968 |
|        | 40.9950639693255 | 39.9397419279057 | 70.1184116246724 | 51.6660481331154 |
|        | 47.798305839406  | 42.1622837416589 | 50.5188367542048 | 40.1700117452801 |
| PLCH2  | 80.0866955521632 | 496.163796158189 | 1369.13346566895 | 78.0020909283414 |
|        | 192.95410840632  | 64.3383155834968 | 54.339958888486  | 199.404836798715 |
|        | 214.980684661682 | 511.792908607692 | 505.294880430281 | 447.448900931272 |
| PLCL1  | 47.0239604970019 | 51.8282177617648 | 40.5734458834617 | 45.1151758109609 |
|        | 42.1386542162789 | 50.4903978345787 | 37.1643693306382 | 42.6450179841129 |
|        | 42.3138951003676 | 40.1613888954735 | 46.0905079010237 | 40.9683275553869 |
| PLCL2  | 69.0975200641705 | 63.1780854659428 | 78.080034922779  | 222.728316525835 |
|        | 52.8190882379316 | 98.501431740607  | 64.5722284870633 | 178.98901256658  |
|        | 51.3511088648386 | 84.5055910320032 | 98.0473811574767 | 58.0218262176065 |
| PLCL4  | 42.2455707947223 | 44.3529919625344 | 68.8098607236981 | 44.9370339275041 |
|        | 44.4489662507893 | 43.5752393599169 | 41.8315602975157 | 39.1652965788406 |
|        | 40.6957787921451 | 62.5036823572932 | 49.9338905397767 | 51.7833333848627 |
| PLCXD1 | 230.053744836012 | 266.79157803247  | 132.107655569343 |                  |
|        | 159.022432105333 | 101.681822254799 | 83.955786676926  | 305.399644617845 |
|        | 817.631505579476 | 181.531005915656 | 110.09868737254  | 106.897106266912 |
|        | 89.8035133597498 |                  |                  |                  |
| PLCXD2 | 34.2180669723984 | 41.7337506166619 | 32.3881195727383 |                  |
|        | 37.29566077996   | 35.9058393060637 | 37.9003288112261 | 37.1643693306382 |
|        | 36.8400213077707 | 41.863927676552  | 38.3092241935352 | 47.7535797917441 |
|        | 42.6758568421347 |                  |                  |                  |
| PLCXD3 | 44.8914371498528 | 41.9894412416874 | 40.7620472083159 |                  |
|        | 43.074472921841  | 76.6914642534934 | 77.554620469891  | 183.086707591185 |
|        | 49.7309743973184 | 44.5303781239209 | 47.8207974930031 | 56.233217375698  |
|        | 45.9693232070002 |                  |                  |                  |
| PLCZ1  | 36.5393857306744 | 36.5219488315447 | 38.0452862258803 | 37.29566077996   |
|        | 41.467005949568  | 42.5660695551615 | 40.6750540874299 | 38.956280281655  |
|        | 36.4476883897928 | 36.5806287103157 | 37.7384958256497 | 40.5703581862752 |
| PLD1   | 125.044670102036 | 55.8046062733709 | 61.4416707689893 | 75.9099205260748 |
|        | 53.4109882045447 | 53.6858208094027 | 67.0455170947389 | 53.9465584609317 |
|        | 49.9162522057712 | 90.5603308057889 | 77.1900613562529 | 91.8935361535002 |
| PLD2   | 71.9062462001972 | 88.5458450926665 | 101.804757613639 | 95.3070802596041 |
|        | 68.9766943946607 | 66.1082848714279 | 73.0433648756396 | 71.408876667815  |
|        | 65.4784797364469 | 120.129857395808 | 94.1247862405958 | 89.1771576058145 |
| PLD3   | 155.270252661048 | 175.378964448101 | 245.194730981772 | 247.298165265093 |
|        | 345.294930735691 | 228.660261263355 | 239.569514501529 | 167.034910927177 |
|        | 230.286815921497 | 177.958475301951 | 203.46147333933  | 137.785462971848 |

PLD4 42.2455707947223 32.7800533388945 36.6522278218553 44.1483976313959  
43.2484996523549 33.2552842693684 37.9430145836712 43.1567024035183  
34.7722083264266 37.0320432433314 42.5426057453993 41.863927676552  
PLD5 40.4639532172338 39.1982470626863 33.9435456570176 43.6726153508978  
36.3390947880186 46.574682061365 42.9803717121865 41.2551966132486  
37.8319142847141 49.8393069675192 39.0550139257658 41.9430737035925  
PLDN 347.247950836937 256.675896425075 236.661422875826 383.853296408061  
224.231862271463 302.50850157207 248.058310353348 498.958550919515  
191.771063132796 332.230531176052 397.745727767552 344.314901683001  
PLEC1 63.3315266915127 66.2154717217675 71.1521292570086 55.4180794172794  
54.3820590274321 57.2273929905553 46.6371881832312 48.856176220627  
72.909783842776 61.7865043876727 63.5549258538503 51.3590013627505  
PLEK 159.797219482154 197.070092523652 252.949225605064 5601.18872540083  
98.0143500562821 301.357530757236 1319.32406112346 184.808179948172  
53.3932110698117 67.3934788330567 59.4188882103773 74.3442318693865  
PLEK2 72.692416146584 126.69706456173 213.830284761604 72.4834467838798  
120.309345127552 51.294537308199 135.866407965991 89.2385568686014  
222.81957100654 166.535245140901 122.368552598681 234.113622230498  
PLEKHA1 121.936597605894 594.812016966595 391.187784616808  
141.649461526745 320.889609846069 241.222680673439 241.599353653369  
192.171116215791 171.877918435017 202.872083191114 229.584451980272  
260.910912798295  
PLEKHA2 87.6178717341967 89.9650488563894 116.080897948094  
163.917208464731 77.1900613562529 112.131738588405 88.8772406115484  
121.172652675767 129.675613712326 138.100169316776 115.597550918377  
104.821285642918  
PLEKHA3 73.7133884699889 96.038271786159 72.9051985681184  
64.6945454069792 84.4230484528318 131.126942328593 57.6643188499117  
66.9340967279385 64.643220133046 57.9713749600418 58.3586374083245  
88.9641595603127  
PLEKHA4 124.22494803053 53.6429962450784 65.1185966859561  
81.2269477373795 73.9456720099807 237.237762964658 117.811967515956  
95.8297699573536 101.187156681366 109.192770642308 86.0100701849272  
102.49785018292  
PLEKHA5 51.5033727579864 50.164201758929 55.3812135024656  
36.6501141438378 42.6022652963326 66.8632294055679 54.1707158323527  
47.7889447429963 60.0736861987141 68.0556717366572 62.358854072801  
63.2113624676341  
PLEKHA6 63.5693267269002 75.6614221167993 123.233259665079  
39.066284740632 46.1804647841331 69.4214927857472 60.5125774827425  
60.2691630545162 78.3082773071531 166.847053797281 115.40235710164  
138.401109242778  
PLEKHA7 72.8120269375546 214.245832611737 150.011814577972  
97.8309399470621 114.363816429963 61.4944752562671 82.2650787041549  
78.1448136847078 176.02137177982 103.001949900533 101.187156681366  
89.6670947876322  
PLEKHA8 38.5648843914189 41.6466169548846 36.2683886571585  
37.8442841690502 33.3231576795423 35.4142595025086 41.9393838138203  
39.2672712041774 41.6616444147804 37.8217989841918 36.7283081422707  
39.1553169409075  
PLEKHA9 80.6434122355417 82.8205269728224 77.1614179978243  
65.084620579901 85.5362566454799 112.131738588405 100.499763255098  
115.328304312071 115.328304312071 131.258204302177 106.771536005741  
122.837001441551

PLEKHB1 67.3816715975056 51.0175677516029 49.1067959632109  
55.4180794172794 56.8307116636372 74.0995052892511 101.549779766678  
220.621142396402 61.7865043876727 74.1228645930185 70.5133836963171  
69.51607174053

PLEKHB2 80.2979179444897 141.471672990444 97.2316181542823  
254.920345078558 88.8568707880669 72.8167175634793 80.354283778818  
77.4726605310965 65.9703614596867 75.633664798698 95.9485602132766  
78.4641751788842

PLEKHF1 530.996217072759 202.795613942391 147.209004629384  
109.144663527001 587.060466667911 262.779883562966 938.151864971251  
637.824136761292 382.120608305668 295.25359816523 314.924656469102  
237.100802227545

PLEKHF2 46.9395507483816 63.2804984998739 51.5292723244077  
61.9976238937207 75.5510570035251 55.6735944873518 53.1884505015411  
48.6441988290952 52.2216613535546 41.1222709786153 48.8454262547204  
50.7487159427973

PLEKHG1 66.1229691315616 92.4449920876332 75.561262816077  
58.6431245059655 81.2359429678503 59.0162231611996 85.6236091398006  
86.033725825968 75.3222734438062 72.7502212566295 73.7873098190297  
66.0224755625662

PLEKHG2 67.3816715975056 73.9376772899278 68.1780382173625  
85.9087280306456 101.867388894697 64.3383155834968 111.025105784166  
61.016921238986 46.6944238390932 46.1390887492649 46.0905079010237  
42.4607795638552

PLEKHG3 216.654612568853 106.521012342668 209.551557135809  
114.611557317665 116.22441634196 216.943972794603 106.878946016737  
162.721587349434 202.230726475934 245.691073028699 244.872078761743  
244.226756210656

PLEKHG4 70.5096706089299 175.136856246782 61.4416707689893  
49.5424425850549 88.5564369981649 52.8421046802739 70.3935694362568  
45.2806199505029 52.7512110769042 41.9666541498638 50.0808824383821  
42.8864415494484

PLEKHG4B 38.6454098044474 33.6902293666089 34.0382693188794  
33.3231576795423 38.6454098044474 33.6859433472087 37.830876898596  
40.831207953647 34.6720534245631 35.0082729554459 33.9478220100351  
36.7762265039864

PLEKHG5 38.9362367504931 40.3969295784597 41.6497049502224  
38.9152309941518 39.7295015093492 39.1672722060725 40.5585676679482  
37.0016033141464 42.0217776707284 39.1302941526825 38.9934686082455  
40.7704587752083

PLEKHG6 74.7955767483841 104.17651993553 83.6438735616921  
42.1273928203021 58.037539503209 41.7627910693483 187.767803297395  
222.81957100654 177.779514321673 143.443713592074 145.476204287528  
146.117756310709

PLEKHG7 46.441301934328 41.8848959280916 49.2041300973417  
44.4367387274922 41.6806984441849 45.3882138838137 44.2166118829877  
44.797320243931 50.1603795873336 46.2286164776607 45.1432412071268  
44.9070250604284

PLEKHH1 56.3471340054074 68.5251167137806 65.49167373382  
44.7980740332174 70.8749669449099 42.5660695551615 55.4004611309636  
57.9713749600418 72.5027069303875 177.334352189317 141.370796803908  
137.132535402637

PLEKHH2 51.8781065691038 48.6447083765118 43.401782064778  
43.6726153508978 50.7615314686244 54.5952754712007 38.5066108855005



59.6720198281342 43.6670755115848 56.9463858443402 54.2999306485758  
51.4968903591058  
PLEKHH3 98.4084364053686 157.615972646659 239.385229462309  
42.6913548400127 103.356071080819 77.0226403968683 75.0665411373616  
79.8264217848103 186.522518256229 136.293724800658 182.37433006793  
119.700522283289  
PLEKHJ1 58.9201382292404 87.3385669984704 61.5080959417997  
57.2856683017619 121.84142967836 51.4931742685391 98.9988668602468  
99.8277095030346 98.9712341137316 59.3618843678775 69.8899273527731  
56.4578213622965  
PLEKHM1 97.8141040140486 115.221134337342 93.9472621843566  
126.336900591139 77.3931945683613 72.4651758215622 89.7242042805798  
122.143519601825 102.610376474754 97.1201502245778 97.4062608315831  
73.9986015964321  
PLEKHM2 698.105755081829 488.277500837251 633.602650842189  
665.510487460287 661.880230068693 608.005012673672 546.94113683381  
651.078746026341 640.78586776574 487.64491967937 419.741944629785  
407.336051853854  
PLEKHM3 39.3709357615493 41.3610369241157 42.0621425894624  
38.4208429103799 39.3667161654772 36.1190722948669 34.9344532055397  
38.079222289614 39.7537274655115 40.8049408996274 37.9230440150891  
42.7782216342806  
PLEKHN1 56.6086202928268 73.845912534353 68.1780382173625  
51.5913529948887 57.2960245538881 50.4022543872993 74.7534423194688  
70.5322939116406 53.7442594289333 83.2925226467532 113.504745041505  
73.9986015964321  
PLEKHO1 134.519244495139 104.305801811472 81.4931910857436  
325.450452751375 105.317399386109 300.121875447445 125.891602778425  
133.576489624155 60.2614254907771 160.53293875611 180.994353525666  
151.975559850216  
PLEKHO2 103.561100886469 63.8399092891728 66.5285423077808  
172.039289618908 49.452985143568 171.974852167092 52.0942589368478  
77.118454956956 52.3579564953125 77.775644509079 86.500678864429  
79.1209792219434  
PLG 45.4799270968969 40.148780650831 36.769073068743 36.0481934423077  
39.4693871570028 42.2577689927563 38.8417151851134 37.9837233601316  
42.0621425894624 40.5090849993014 35.9563099719284 41.2437378488025  
PLGLA 39.4710743516517 42.3781558291981 42.8663534227844 40.9022255200169  
40.9450021938518 40.040778349137 40.7451277736087 40.2805545863338  
40.6533975461148 45.5776159432079 41.3122147844752 40.8084239472012  
PLGLA1 40.1145011765998 41.9397336249742 43.0589430473426  
39.3513480332078 40.9950639693255 42.0902716047029 40.0668875818227  
40.9808244695721 42.2331334096358 43.401782064778 41.8168470823451  
41.1138630151981  
PLGLB1 49.4151347850687 49.8642691497064 50.9493788151501  
42.1679276329916 45.8051846088552 46.0364000143537 54.5593748585832  
45.0972184964705 47.9035532886869 54.1090536870282 52.7817052791259  
50.379587451669  
PLIN 39.9697332660833 44.1239711172417 43.1931731665131 39.7411455670172  
38.3561682218911 55.9351706773613 42.1607322031054 43.3262148375525  
44.2607789091176 46.2286164776607 44.2925355984056 43.9541718254769  
PLK1 79.0304119352941 80.7198077526005 87.104092810486 59.987045425047  
96.7351644023249 61.9432904657734 89.7242042805798 70.2541961995753  
96.8141712830545 54.6089451252049 54.7883681830995 54.6659845741133

|        |                  |                  |                  |                  |
|--------|------------------|------------------|------------------|------------------|
| PLK2   | 46.3390850717989 | 46.6996902348633 | 49.7350276169552 | 40.646702696033  |
|        | 41.9842695818285 | 43.2805590023412 | 34.4570158133896 | 41.8417024632349 |
|        | 40.9901805728485 | 39.8873706855774 | 40.3452320167286 | 43.6753843488695 |
| PLK3   | 38.7537364570873 | 42.7775752471711 | 37.8386378737561 | 47.8164193292842 |
|        | 36.5393857306744 | 38.7340969861754 | 31.9682164860619 | 34.4896350146096 |
|        | 42.6366765186182 | 35.2880714952489 | 34.5633623842083 | 37.1747156131306 |
| PLK4   | 99.5058761858884 | 173.013258797349 | 101.693848821246 | 58.7338159410728 |
|        | 217.995354056264 | 59.1570467228834 | 172.599587851881 | 139.925369282704 |
|        | 115.748516258517 | 55.5206840401643 | 52.022479439889  | 58.2251348002272 |
| PLLP   | 56.2508140932179 | 150.46866649779  | 194.896610327943 | 47.5733603903505 |
|        | 129.270792739554 | 62.5542376788358 | 268.35323266566  | 59.0702424913324 |
|        | 270.922452389109 | 225.618853905635 | 193.15756263121  | 130.293915348934 |
| PLN    | 40.308802735799  | 40.7602938767524 | 34.4021554788966 | 41.3027031037343 |
|        | 41.0476065156912 | 92.0711167984454 | 37.6036146841933 | 40.931294690669  |
|        | 41.134180463103  | 48.8623729374733 | 50.0303076717704 | 72.487245822532  |
| PLOD1  | 1141.25078954012 | 478.682734715193 | 688.168272082335 | 756.801598119483 |
|        | 1351.49940447914 | 379.933650669101 | 621.489785652602 | 426.276230164353 |
|        | 851.813216452015 | 560.954913956997 | 488.649780652311 | 533.644397257453 |
| PLOD2  | 466.074595343541 | 104.824641162138 | 143.875527523263 | 255.800286504974 |
|        | 185.579050480127 | 239.350719871688 | 258.589426470951 | 134.258351436533 |
|        | 410.623529765253 | 120.447568925399 | 98.6039579639704 | 273.849703944739 |
| PLOD3  | 479.318513108472 | 536.73426937255  | 492.13077103258  | 490.301992866742 |
|        | 621.489785652602 | 378.626656077546 | 385.675278463448 | 466.935292808402 |
|        | 433.447319956981 | 361.632211543977 | 329.763197973922 | 309.802432824498 |
| PLP1   | 40.2543341073001 | 41.1131693269222 | 39.4710743516517 | 35.2339574411711 |
|        | 41.3440240757217 | 46.1513019317765 | 39.9397419279057 | 41.7419877611072 |
|        | 37.1820543575123 | 42.9413736814915 | 43.7924421812682 | 41.5536168238478 |
| PLP2   | 65.5495324730507 | 62.2150049214174 | 73.2144205844199 | 92.4781449270918 |
|        | 50.0580547772867 | 95.0026207727863 | 106.226670314211 | 66.8364940429355 |
|        | 90.2790229242453 | 100.975810139572 | 70.5133836963171 | 112.585860083115 |
| PLRG1  | 181.966839676473 | 181.844123841452 | 215.645475520124 | 208.7739716139   |
|        | 240.431987635418 | 299.094486437911 | 185.924923239764 | 234.946245049134 |
|        | 249.632045894263 | 220.36831243882  | 225.460800739619 | 236.661422875826 |
| PLS1   | 73.0186209472046 | 131.307600147917 | 115.256208610595 | 49.8304479381623 |
|        | 147.137598111239 | 56.1115976952096 | 252.949225605064 | 111.874193363836 |
|        | 154.847446197442 | 85.5439309325541 | 119.621934826916 | 207.380865650247 |
| PLS3   | 468.153823329361 | 318.527516338791 | 288.284384035759 | 181.488068017883 |
|        | 337.51861578231  | 367.158502379417 | 270.253329297593 | 350.278532614563 |
|        | 384.919835924792 | 406.417924060562 | 305.554059609771 | 352.768184657577 |
| PLSCR1 | 73.9192243586276 | 74.8071157013401 | 100.43365828852  |                  |
|        | 212.64342554355  | 111.096799408676 | 104.305801811472 | 106.140215438654 |
|        | 64.0476795495651 | 67.9176876913772 | 46.325232414659  | 50.3221380889396 |
|        | 87.799979434508  |                  |                  |                  |
| PLSCR2 | 37.9387791625384 | 45.5842286511645 | 48.4890615340603 |                  |
|        | 50.378948785456  | 45.3675390992851 | 39.6251842352088 | 44.0687697278114 |
|        | 44.6107027295193 | 48.0163377492228 | 44.1379638573455 | 50.3876754565799 |
|        | 42.2577689927563 |                  |                  |                  |
| PLSCR3 | 1000.65752290829 | 1585.90718459092 | 2160.22713775462 |                  |
|        | 727.788854407888 | 1252.94510628089 | 844.431085166353 | 849.412637017524 |
|        | 462.105603187328 | 664.453262499828 | 935.815928529014 | 706.914069768466 |
|        | 772.368030410394 |                  |                  |                  |
| PLSCR4 | 99.7403508491191 | 57.4054069675016 | 47.4740726032707 |                  |
|        | 90.2790229242453 | 48.2748123114598 | 252.347641176529 | 46.8613212048981 |

43.5544347011646 48.9931786790166 142.731630650904 138.12608134713  
 144.139555313429  
 PLSCR5 38.8561375693335 48.5905518770847 34.9849896310235  
 44.6905691366696 40.9950639693255 42.4580504587581 40.5585676679482  
 44.2159020605784 47.0804681460898 41.5435611403119 39.2542963855807  
 39.3575468494941  
 PLTP 226.35806628102 313.528012643479 475.881757842864 376.141477833569  
 805.87120346756 711.08269990525 244.907057340556 198.129308943666  
 375.818861583151 242.899629257173 192.763875975315 277.204818876581  
 PLUNC 37.3463875295726 47.5647821785529 41.6977706798234 47.6687908290818  
 45.8051846088552 39.4953494583071 47.4439407315335 39.7509165247419  
 42.2577689927563 39.9948390976317 37.2892641289258 44.7401523707775  
 PLVAP 154.730266766226 154.730266766226 228.5355586337 204.774090707986  
 118.885205874725 118.745729915256 59.5205055437765 149.629940171074  
 67.8208976798364 74.2379710965903 169.001200403896 80.2727193069362  
 PLXDC1 43.9309845324767 43.0971787292711 47.646800205189  
 38.3166554965434 41.1868052124344 45.4882438975269 48.0283573444179  
 46.9986083378817 46.4861258030402 42.3606390470387 46.3370338074996  
 43.9541718254769  
 PLXDC2 230.649032296928 59.7098454699348 67.235655687817  
 291.021345839327 70.9638091288679 129.909461876076 63.1604223919703  
 74.7794253940974 40.3316153483289 124.44575078108 135.824520574227  
 159.306689057291  
 PLXNA1 233.789761419387 273.981867154936 156.770274308736  
 212.64342554355 255.162270021715 118.410983614453 133.576489624155  
 129.605603092944 109.828760284519 93.3897477314201 94.6300022444815  
 113.130838519437  
 PLXNA2 45.7356815244513 78.3658211474135 88.9255521472874  
 51.1313686723929 44.0451487108213 50.2163892855092 37.1104431466673  
 45.7476095696859 53.6837370963602 58.7460488758053 55.5712957590038  
 48.8319884367456  
 PLXNA3 180.15711251649 183.431582521592 105.726287089142  
 114.363816429963 273.070365538675 102.163854544231 287.247399926139  
 146.133951379664 142.34144664795 111.056599389048 113.169111095305  
 75.4935574755043  
 PLXNA4B 37.0320432433314 34.9262464079777 34.1806289878747  
 32.7960913111995 38.1644569189523 37.3799542961839 44.3440839686558  
 39.9576138799997 39.6609238036815 39.4710743516517 35.7953070087288  
 34.4570158133896  
 PLXNB1 358.083401917765 600.34379987143 413.82087661958  
 62.1776700757427 288.447603611962 143.265312025262 484.218958528411  
 303.93332785291 364.962649416567 371.513106715598 327.984902171255  
 260.910912798295  
 PLXNB2 327.729165976539 327.024556075244 296.842555066902  
 177.985573759136 328.295200683554 174.117816184497 250.504350952583  
 276.633536223159 459.92905629125 307.656792056993 327.729165976539  
 236.910422092851  
 PLXNB3 82.291097567232 85.9799968870368 88.0368652545541  
 51.0175677516029 104.599492214295 57.8005007012205 61.8571521441451  
 91.6777754418002 80.6434122355417 76.5375674421131 80.6032289311256  
 65.2125527940945  
 PLXNC1 46.8141313516997 48.7084357480922 46.8267540220952  
 105.580434427464 42.9090346219023 51.4931742685391 50.0088611244948

41.3506832276112 41.1742244762318 45.3530683538086 44.1148826235374  
41.6550823405646  
PLXND1 37.55264801907 41.159706131351 38.6727842796202  
38.2041059863839 34.0045980663271 38.2293008890613 34.5633623842083  
37.0390589468421 34.1294694030979 33.2987269789328 38.6662194645633  
33.3192849177028  
PM20D1 45.3872406432794 321.949943388959 858.975085087497  
38.8495095797881 539.879151334921 117.520762118299 156.061711961514  
37.9837233601316 222.570136481811 58.8022152133979 152.920586451578  
58.5087296620514  
PM20D2 45.0985088502363 47.8400694856726 41.3366779545815  
40.7481155008596 44.9936360641969 70.1074782747874 46.8613212048981  
51.2623287419357 51.8824384192988 57.4665857273093 55.3147456054175  
73.1447139654971  
PMAIP1 45.4507786740825 88.1023600126139 49.8344973836834  
59.8102324370568 41.4397539024976 40.8091178323174 63.2726414544553  
46.2286164776607 60.4564459263716 47.3010040326346 47.5733603903505  
53.5643281930979  
PMCH 42.6036491382658 39.9697332660833 51.223859150798 37.651298468202  
40.2449343247539 37.7000400506818 43.8206425661746 41.7419877611072  
41.2870505273664 38.3092241935352 40.6373400186325 39.4490233720848  
PMCHL1 45.4799270968969 45.6533175604486 33.9435456570176  
44.0451487108213 39.9697332660833 40.9506062495231 49.6872467499977  
42.157627240486 52.5772854102326 47.0055981216687 45.9104478407175  
32.554751989205  
PMCHL2 43.7164681443605 40.8476436931481 38.5442780220289  
39.3455642782085 38.0089018744739 41.2098211956301 39.3585350448719  
38.745552403895 45.620219291723 40.5090849993014 41.0050831223107  
42.1537476443423  
PMEPA1 292.667929804781 70.3629652777935 72.1591028956359  
130.72385089567 119.369994922092 90.6191520659197 42.810624012519  
86.1779349281961 55.7522234735038 48.6705421229977 52.864136882462  
69.3483108270756  
PMF1 84.511841810844 119.263603432127 123.233259665079 84.0899854321388  
113.747633871556 88.8760662992208 133.060894083935 64.4156641487994  
122.748811531184 89.4747568145717 93.0801307192343 76.5411379733694  
PMFBP1 43.0930293831497 45.4882438975269 57.423873475544  
50.5310598656998 46.3150221024046 42.6575535390785 40.4359177791566  
48.1591264215184 39.2809305246091 44.0409178714232 43.6629145624937  
43.3744503319109  
PML 48.142959612073 52.7005092555102 47.6078178048638 47.6687908290818  
47.2688410084982 42.7126062474942 52.6747142992864 46.7422176152443  
49.857015233295 48.8076332017524 49.2787020048416 48.2236337867222  
PMM1 242.282363793567 269.284584971871 255.162270021715 144.813029178278  
240.6614822416 298.607482741423 308.728126648231 257.506228440451  
238.616000665585 280.239058266018 223.749512763927 215.68113524702  
PMM2 146.789051265805 189.80672643731 176.653849515825 155.762961582213  
182.343696914747 123.176449895397 198.729330487352 197.259755509929  
180.319381873429 127.937436596431 129.965747812294 118.556124582201  
PMP2 32.2133093774284 41.159706131351 37.2838080935695 42.9358255168086  
41.2740822675592 60.7488007939604 37.830876898596 46.4672637826582  
42.8036731479932 57.4665857273093 43.6629145624937 36.3454320848591

|         |                  |                  |                  |                  |
|---------|------------------|------------------|------------------|------------------|
| PMP22   | 430.283061862756 | 173.434174644937 | 139.731620245421 | 841.316771679857 |
|         | 205.051252996628 | 1037.51323185348 | 280.490447179545 | 532.981045084589 |
|         | 58.2834547183468 | 517.664764759512 | 400.093769705765 | 448.508714709248 |
| PMP22CD | 45.0985088502363 | 43.3458769998118 | 40.5734458834617 |                  |
|         | 44.4367387274922 | 40.2449343247539 | 41.6590564937735 | 40.0052661202207 |
|         | 39.9576138799997 | 46.4164127487052 | 44.2580151149956 | 41.6336636285875 |
|         | 40.6614700944853 |                  |                  |                  |
| PMPCA   | 378.12777235743  | 209.750053979826 | 146.997252473598 | 173.694418385132 |
|         | 268.936151471133 | 176.670909065664 | 405.852280880924 | 225.690879436355 |
|         | 157.568088397305 | 286.961967690465 | 320.555790243104 | 186.984157187427 |
| PMPCB   | 210.308352532282 | 336.051695056915 | 374.026381773215 | 257.761541860837 |
|         | 342.387761195952 | 319.722393409101 | 253.723909157663 | 514.261598258395 |
|         | 380.4099232546   | 244.907057340556 | 253.140146266702 | 354.015808474189 |
| PMS1    | 49.6241203903354 | 48.3699741879723 | 46.6588655218735 | 37.651298468202  |
|         | 51.940083408061  | 41.8613406887824 | 44.9863726205428 | 50.628152951493  |
|         | 46.9739160257217 | 54.1683282066029 | 46.824299585607  | 49.5539622682049 |
| PMS2    | 49.2077595451576 | 51.2024692590155 | 49.2711931653625 | 46.2528333282885 |
|         | 65.1129635608639 | 54.4190527512508 | 48.6395795163502 | 49.2019743609873 |
|         | 58.9056300364078 | 45.8424887733913 | 48.4916117779992 | 50.1092226717582 |
| PMS2CL  | 48.0636214000589 | 52.7787010032051 | 52.2132783757422 |                  |
|         | 49.2787020048416 | 61.7145383558704 | 49.7458652239071 | 52.0042367882776 |
|         | 47.6534909074889 | 54.5518174219283 | 44.0578434007778 | 49.0816063338953 |
|         | 50.420938814754  |                  |                  |                  |
| PMS2L1  | 42.8596678196469 | 51.5690261542089 | 58.364744007152  |                  |
|         | 45.1944222548351 | 49.7465830004954 | 47.8090108477641 | 49.8865955311391 |
|         | 46.852437033077  | 59.0850755856409 | 48.6124127998952 | 48.1682125052975 |
|         | 49.5143331736386 |                  |                  |                  |
| PMS2L11 | 44.9896851005259 | 43.9421822132391 | 46.5650556481721 |                  |
|         | 43.8002456102021 | 47.3172462673426 | 45.9266745571724 | 42.4939802311136 |
|         | 44.0390019242862 | 46.2027193115397 | 42.2614524730856 | 41.8168470823451 |
|         | 48.7814131120945 |                  |                  |                  |
| PMS2L2  | 50.1533437545239 | 44.3529919625344 | 44.9758339877851 |                  |
|         | 43.1847628331565 | 52.8190882379316 | 44.6524308640784 | 52.7002314230604 |
|         | 49.2901038327894 | 53.2046867327331 | 43.0919221375514 | 38.745552403895  |
|         | 47.3992733452821 |                  |                  |                  |
| PMS2L3  | 51.2318935933116 | 57.6459037974353 | 68.6627996695828 |                  |
|         | 45.1944222548351 | 73.0433648756396 | 41.5132248356707 | 49.8281348927244 |
|         | 50.9099078696349 | 63.9851732498913 | 47.611018474151  | 47.5733603903505 |
|         | 56.9133235865341 |                  |                  |                  |
| PMS2L5  | 92.1455386560941 | 83.1308709614708 | 102.87193290903  |                  |
|         | 69.4677195088043 | 109.758297200083 | 77.9085946827079 | 65.3694267397114 |
|         | 88.3335649692467 | 99.4633962228768 | 62.2025996860055 | 68.5725871332774 |
|         | 85.8694579123452 |                  |                  |                  |
| PMVK    | 63.200752695983  | 79.909124697198  | 146.840603547323 | 81.382229980722  |
|         | 102.170521765252 | 107.808744445896 | 93.2133061608764 | 97.2750076101755 |
|         | 88.3799086910448 | 119.86041265821  | 99.7487400187637 | 110.947379383048 |
| PNCK    | 112.351686948586 | 810.382224368065 | 1362.12587130194 | 65.084620579901  |
|         | 2878.82618761804 | 945.065986430527 | 1564.55598228713 | 140.698550434486 |
|         | 2528.6392272518  | 1630.25992078321 | 1223.01485352248 | 1395.33665255999 |
| PNKD    | 237.532800487032 | 148.312100828662 | 170.184914156265 | 229.584451980272 |
|         | 109.877541092909 | 99.3448096967314 | 98.9397912793266 | 89.2913927776683 |
|         | 194.896610327943 | 158.884110481815 | 137.802147212644 | 129.747577660612 |

PNKP 197.598956071422 358.083401917765 376.749116251503 245.439289067575  
 402.412173952792 178.608544676872 343.304521604977 501.817654561915  
 465.430886956232 314.695946588538 354.158105175308 238.584514797019  
 PNLDC1 42.3433931248155 36.6968906669565 38.4043916290561  
 39.3750969348308 38.1644569189523 32.771863438151 35.7055410599146  
 32.7676164492555 35.6139301508335 40.6022003765153 33.4071187618571  
 40.9683275553869  
 PNLIP 43.9309845324767 45.0115870036541 39.7411455670172 41.8778873678551  
 38.5512429290626 45.8325181856483 38.941855825269 42.4580504587581  
 43.1805016690297 46.441301934328 41.3553369544097 43.1805016690297  
 PNLIPRP1 37.0320432433314 35.5310164682026 34.8956628705329  
 38.9534635879195 40.3452320167286 38.5252456306656 39.6535880152834  
 35.7973685350741 40.137818555383 39.9948390976317 37.1059647239814  
 36.1647506311964  
 PNLIPRP2 36.6480005877129 37.7384958256497 38.5045333213784  
 35.6027791404152 35.1411239266238 45.9266745571724 40.1235656101329  
 35.1738399826814 34.226171989766 33.9967481174035 46.7386599624801  
 37.2810767789306  
 PNLIPRP3 36.1232327599945 36.3110701990588 38.2280071951674  
 38.5252456306656 33.9142669203111 37.2686490268265 36.5352572191451  
 39.6474008369935 35.3227485563945 38.8507804383261 37.6484782516569  
 41.7575097298927  
 PNMA1 105.05842887748 56.7826399116207 76.889690218685 91.0346886951891  
 79.271901834289 143.265312025262 65.2361525412756 52.407151732257  
 48.2123120250343 71.7464249053513 64.3824529624475 69.51607174053  
 PNMA2 54.8439819445945 50.0425298550559 50.5089777244781 56.0794100106654  
 44.5668141895992 97.152024864444 40.3302268293707 59.0262390168156  
 46.9739160257217 72.0443425395404 60.8662233098324 69.1099722732115  
 PNMA3 37.8386378737561 40.4359177791566 42.5406888281114 60.1837189855762  
 280.446302631438 47.5733603903505 37.1643693306382 61.3864512710242  
 37.0126425326534 36.3612409063792 37.9230440150891 39.0536056496869  
 PNMA5 87.799979434508 33.0553208959996 35.6139301508335 43.6726153508978  
 40.8873907150245 36.8059561571675 33.9750800030909 38.2782436497441  
 427.818758455214 34.3674468322242 35.860430241131 38.8495095797881  
 PNMA6A 37.7384958256497 38.5252456306656 38.8775560911841  
 46.7577982595088 48.8381507187986 41.3553369544097 38.4005795891396  
 47.0940613507321 37.10170285405 41.1222709786153 40.723990462047  
 40.7704587752083  
 PNMT 47.4678477186801 50.8812920005251 71.2246788429078 42.9358255168086  
 45.5809132232681 43.1826328292558 82.2650787041549 56.0496524902806  
 57.4777075615651 44.4652605017595 49.5923712603197 49.6629259325705  
 PNN 301.025314855652 346.285308869994 362.853023741815 276.795797048951  
 473.688869614777 314.091389958069 339.854688605186 403.664724682094  
 318.234214341679 353.598144765197 321.550107822925 498.958550919515  
 PNO1 112.977333058979 102.25509551881 81.961632059749 80.7168944828052  
 145.847014515246 105.036862798568 85.2088054619229 156.433762355183  
 86.2563919366781 80.5388767883646 87.8967913380047 111.511934617893  
 PNOC 39.3709357615493 56.9312835667828 45.063792968927 95.9391851122771  
 34.2638875325204 36.8059561571675 53.7423898357583 37.7612949798895  
 35.1155486926999 41.0057887014368 39.0550139257658 42.4607795638552  
 PNPLA1 37.7805366040928 39.2542963855807 40.439898672334  
 40.3180310664156 40.1978874031072 40.5805725503899 39.9519547348106  
 42.157627240486 40.2615278292875 42.02667925031 41.0808257270221  
 39.9519547348106

PNPLA2 85.6964911093755 170.829628173552 254.579513401792  
 124.611407530723 223.531821464447 123.032006903803 123.455270940015  
 168.522052983892 209.705575423447 216.004059887037 237.974766880957  
 142.251426773121  
 PNPLA3 42.9104454767916 36.89524015739 36.178547300352  
 36.4564050256915 37.6527901109005 35.0970060242246 39.7576136507593  
 39.1652965788406 41.863927676552 32.2463318211725 35.2339574411711  
 32.6203270051744  
 PNPLA4 40.6559419616644 45.5842286511645 41.528370959196  
 49.1786207920603 43.9450023643394 43.9724628401189 41.8315602975157  
 38.8495095797881 54.0192060888782 44.571915452417 46.4205654140754  
 53.0446815750355  
 PNPLA5 37.2474303302343 40.9731067463382 37.5597671487621  
 45.334106390212 39.5595233162192 39.3841861812262 33.9750800030909  
 39.7509165247419 38.9834959368496 39.4710743516517 37.0180934800573  
 36.3454320848591  
 PNPLA6 253.605641311356 405.978415338586 349.030389220324  
 670.271164195182 351.883708151967 240.314054155006 251.374750265492  
 309.898593637521 260.279110870904 368.793978305607 312.923326422701  
 270.724111544154  
 PNPLA7 536.290060852815 70.6467150815052 78.5325880060762  
 116.547937420457 71.4183281327686 160.950554451488 53.1884505015411  
 130.533514998688 86.6516906104905 292.600202149564 183.690616959682  
 130.524308471577  
 PNPLA8 76.0975301977715 74.2180011215707 74.2429851177794  
 129.434864701718 70.3677225924146 89.1632548302738 72.3515874601288  
 93.6124140212565 91.4121563150184 91.7227477250701 75.2681695276057  
 90.8140983242733  
 PNPO 232.911951245618 313.316269590367 366.129480083279 197.895987726243  
 450.008356194664 260.010554284184 300.762511215441 345.811673759417  
 416.052744271365 248.194954741095 278.697914107208 299.094486437911  
 PNPT1 2844.5506310828 1226.43929953115 1470.84169670955 1817.14004766564  
 1184.75786736273 839.850453078119 1910.5347560855 3465.3013599062  
 1109.17675353971 2803.11698341125 2633.34100695103 1956.75875151802  
 PNRC1 39.4710743516517 39.2907645923217 37.1643693306382 66.4047895961325  
 38.1644569189523 67.5812474586277 42.8684958525042 42.7431359850339  
 40.5912213523345 40.6022003765153 39.9899430628542 42.9887069977696  
 PNRC2 162.782568037255 218.999184133546 193.235216590157 223.562130663956  
 251.65044168003 299.240215762404 232.911951245618 297.404152949522  
 260.426488908824 211.685526927495 276.795797048951 400.760646547012  
 PODN 581.093069802913 226.970981973829 65.2670315837785 180.012192630556  
 298.54401957868 1645.71527614542 45.3597029614942 224.069916407012  
 58.6431245059655 813.767981539781 619.337575854369 447.953017125817  
 PODNL1 45.8108990837624 52.4351670989268 41.437237454134  
 44.6905691366696 47.6884372645373 42.6575535390785 45.6042625176633  
 45.1714698794331 44.7058233759912 37.2089297656361 40.4504608195666  
 40.0557788909923  
 PODXL 122.495387796233 111.669813610213 135.644934816665 126.564008534823  
 73.6036945547683 88.5458450926665 51.0889740983457 88.5907320965949  
 59.8400088701028 77.951185234781 103.394669961417 77.9287386697519  
 PODXL2 318.690767783738 279.782392390288 124.777882272835  
 58.3475983630509 580.27699437241 130.506891299903 410.979796414875  
 352.843053667822 343.990395610093 109.045804556923 111.656567824564  
 56.0477607422828

POF1B 41.5421429082231 44.1239711172417 45.6989664108554 37.8442841690502  
 38.2496050953547 34.0777108441756 60.2399886747451 47.3791873993182  
 38.1169703906207 41.3321861371202 49.532546810992 44.7401523707775  
 POFUT1 77.9493708990494 71.2653846005586 73.7495118153367  
 67.2968280876013 98.5663841503803 87.6763065012524 76.5505585423421  
 62.4219686957673 71.9062462001972 97.4327882336954 81.2753127057048  
 83.877343750194  
 POFUT2 189.267281390459 181.420545696696 252.206029058968  
 171.238235624104 245.060552951511 157.927114480316 138.070735985503  
 169.951840840983 130.64028226556 151.686513723244 142.748812565309  
 156.174166381986  
 POGK 755.852629128252 1190.10462185567 1313.92053019421 315.163147652199  
 1845.34855798442 488.649780652311 1252.94510628089 692.630044242985  
 842.82310025167 940.781370938596 811.142611128461 693.727004855319  
 POGZ 54.8439819445945 49.0697565324841 69.1743062945144 51.8730754328193  
 54.8860931820001 48.4243229779413 56.9320717885002 65.3442444436453  
 55.6087710623795 68.3234331335073 73.6036945547683 64.1607001437806  
 POL3S 74.7955767483841 54.3554233228353 87.6178717341967 60.3481762331447  
 149.792346524401 64.2174369755376 44.9863726205428 62.1934012861178  
 48.2123120250343 57.5713378330876 57.9864701726379 51.3244198342335  
 POLA 37.7384958256497 47.765848710116 51.7138050344355 43.1847628331565  
 43.4544762830742 43.1826328292558 53.0277416531043 45.8669209716694  
 48.2123120250343 45.3530683538086 44.1148826235374 46.6397391251762  
 POLA1 76.8998454389745 75.4732674021193 61.6878176260761 52.1201052574162  
 83.2652824564032 97.0666517150668 124.687212034276 117.074650076861  
 120.881290860109 86.8691342571214 75.3075812535743 100.927111474879  
 POLA2 140.226992517573 163.62024333166 123.368987753537 113.388372364837  
 276.747699321595 115.659933682533 370.64147085217 198.951182954651  
 234.45840519702 142.389246750828 147.06837658726 109.668637140251  
 POLB 320.504100222566 288.023490151593 240.314054155006 219.291627770586  
 344.737170118121 204.251854342995 487.749060801066 710.831173303701  
 411.981987305512 202.395470754957 194.827750623463 249.889110678139  
 POLD1 88.2427413480277 94.6300022444815 94.5055588176321 76.450993090133  
 197.52820443061 79.0940380276977 141.572530741416 97.5962784863854  
 161.326580647514 71.9124897002253 89.5887648181505 71.7408778060956  
 POLD3 52.6960621424156 53.1278271804774 52.6747142992864 52.7924213633885  
 60.6400800519777 62.4450952595811 67.7626103902954 59.4674205670657  
 62.6885730386156 51.4454142248566 56.233217375698 62.8485724004124  
 POLD4 77.2643026985097 99.2824152850072 102.87193290903 147.902378647394  
 70.3677225924146 84.1922656126304 88.3335649692467 72.121833189378  
 103.139459009593 141.567299023381 101.888001006345 113.853553531089  
 POLDIP2 94.5358147295719 88.4740208892504 109.144663527001  
 96.9476136220382 139.356696282462 108.961145389101 93.879589378061  
 100.370937669662 120.571680725698 98.6289539570136 85.1114448808779  
 88.0877175295544  
 POLDIP3 129.268600210689 134.239606718101 103.376225272425  
 130.10148014895 114.093655272795 160.080366694799 111.496552406657  
 132.24963384417 124.56803502087 152.272399644814 153.405734390061  
 161.38599012777  
 POLE 178.123995338196 108.147548794301 89.8354888041611 75.7666827480067  
 113.612874206329 75.2735539010032 155.693953208351 81.3978207813439  
 134.024691118762 81.6233038764401 68.6199296680241 69.1099722732115



POLE2 57.0006212637829 81.4931910857436 67.5417980425932 59.987045425047  
97.0055689383756 55.0009147092272 103.913834330352 64.8336014343435  
123.25443049561 42.4594149893798 41.4508241771315 51.0647893605839  
POLE3 975.544591158047 904.487756674518 400.210449840662 561.2769907009  
991.630429625437 573.832332097619 1102.03940742413 744.762787024945  
621.980260052085 523.679443405512 545.514314651238 624.954583057431  
POLE4 1194.10154988793 721.887210480162 370.495645380436 780.708896888794  
496.444080712528 942.247437385029 429.329962597147 901.793120584383  
438.681666410245 625.435083064752 590.709061039001 661.269882993465  
POLG 144.799432299339 120.129857395808 86.3458707176254 126.336900591139  
187.002948435359 86.2563919366781 91.5258329186709 115.577618925646  
149.691911022686 105.414552529943 111.42402759245 123.689895848613  
POLG2 38.304249186058 45.0905928998779 50.6987358483181 44.265834798964  
47.2074332636566 42.750861693377 35.1307934330047 39.1652965788406  
40.0403898620771 44.0409178714232 36.9060997041453 48.5123041297835  
POLH 40.4179476219497 39.2907645923217 42.157627240486 41.3567204694281  
41.7929491793697 39.6609238036815 43.3832826368789 42.6913548400127  
41.863927676552 39.6251842352088 43.7585538437696 41.3948836161924  
POLI 40.2543341073001 43.2649781354792 40.6737160001291 36.1562979552173  
41.467005949568 34.3887641786747 38.5066108855005 42.2577689927563  
38.6322728994674 38.745552403895 36.9060997041453 42.8864415494484  
POLK 38.6454098044474 41.2598458726002 39.1799070031819 39.7411455670172  
35.0181575202066 39.2985791324641 44.3440839686558 39.3709357615493  
37.10170285405 45.1569741609597 38.956280281655 39.2469742642337  
POLL 47.4678477186801 55.7405934254857 48.8100349749783 46.7577982595088  
46.0977687311222 40.9506062495231 41.9393838138203 47.3791873993182  
54.0192060888782 57.4665857273093 61.0979269700412 50.3118072462443  
POLM 129.014076422249 131.112230954034 132.985150338484 111.347228208501  
117.033529761587 78.0586153423713 105.549249728506 96.9880759408512  
110.219274023648 141.649461526745 146.087016079575 114.935101645207  
POLN 42.8036731479932 39.6123051184545 37.9482157381008 39.066284740632  
37.6527901109005 41.8613406887824 44.4639405506967 48.1591264215184  
37.9273653326866 41.0057887014368 41.4508241771315 38.1421709520616  
POLQ 145.30915313164 85.6763929745253 78.7825895852659 53.0284011078097  
250.040637073537 52.0299937917925 156.311985997533 180.679129876248  
130.313381811168 44.2580151149956 41.5421429082231 44.4475838947656  
POLR1A 36.7356360093603 40.716553247236 39.5450079747895  
43.5627649099623 45.3675390992851 49.1013967533186 42.9803717121865  
51.1694248620208 42.7150227340364 40.4136535208406 48.8744644207821  
42.6758568421347  
POLR1B 65.5495324730507 71.2708400614309 55.2141529491512  
50.9493788151501 61.954674965065 51.0071565607171 61.3149617644002  
57.824185116862 48.6494451061637 58.037539503209 65.9900865113645  
51.6660481331154  
POLR1C 368.162822151919 270.487135967976 225.056827821165  
131.141908315555 406.33528162722 168.58183910352 329.677454924062  
216.194306146777 313.528012643479 196.427458710993 239.117228656704  
183.028254350275  
POLR1D 421.013324906569 813.242005949542 575.268446033282  
464.025908364057 758.462554576949 503.793770799548 1031.4414268329  
425.435793468733 821.013687795434 912.757335169259 718.832367050609  
1137.43995129921  
POLR1E 117.713885770206 113.767996184128 86.4154945670734  
105.125095381533 151.344720108793 228.933483421328 180.222765336208

97.5962784863854 98.8595497262968 167.16650846037 164.917385239962  
192.43245357593  
POLR2A 463.684654468418 1174.92419086759 935.815928529014  
504.676944739425 470.004780385708 370.64147085217 727.181489302632  
897.198663109723 777.854349637516 780.708896888794 834.14766574977  
521.029507993615  
POLR2B 143.932614622477 190.854807132673 172.65049903872  
174.860894067053 240.178571901813 177.935411895372 134.024691118762  
146.594288395595 190.099949303905 98.0352049248004 108.323780226301  
163.643603259911  
POLR2C 182.204124363356 283.643027929014 225.725485439572  
193.235216590157 130.936053902005 262.534449975056 248.924819383887  
162.352052340273 287.932410610182 181.873969432903 233.577690223567  
223.826005691932  
POLR2D 109.251112569215 161.65846687852 158.17598244564  
124.976348531594 232.402174615698 116.685453817071 122.514153407264  
123.022511916727 150.480087842118 70.194061829681 84.5267954034597  
114.719721626067  
POLR2F 1151.25293766167 1059.63540694644 952.16345035163  
711.773459577386 1428.47642890543 1280.77934331703 2122.39240932934  
1123.21773312657 1152.55315876935 716.594794909513 793.570993808328  
888.56944380788  
POLR2G 484.218958528411 389.686780706341 336.679355848349  
297.990925644625 1012.0373748933 328.176884082116 747.577738135496  
611.538630852232 516.848416430243 310.821299796803 297.187417426993  
453.456591501321  
POLR2H 394.00931573564 387.631477822638 447.709872889701  
184.898658656843 608.005012673672 270.89711217076 404.175196605897  
285.322305931794 368.913147706435 307.922754395377 337.736535374405  
364.141443387516  
POLR2I 373.714692628967 333.027861213254 378.243295327368  
275.846698617064 544.355979695242 553.328261478032 908.328776521114  
583.915973546284 698.105755081829 362.724027984972 369.451882513347  
332.830805115112  
POLR2J 88.5140510969737 50.6774883370457 73.3448790478335  
72.2577390063259 97.7153995525346 63.8740412329753 68.673864919178  
104.351256270039 120.123385036416 67.5503668962444 62.6885730386156  
55.5712957590038  
POLR2J3 101.688066199665 98.9017950719795 126.764572234324  
87.6018870099686 143.251956814524 120.789309915619 77.6574950328663  
87.8505898087072 144.227861902786 84.5913809068614 81.6780581904253  
117.706922397135  
POLR2J4 47.2229379406591 45.8235145019504 46.2025991910641  
43.9835428027381 44.0898965223404 44.4372514778289 44.1294459089314  
52.0999467564713 45.2466660742886 48.1818209033198 49.3627177933228  
46.8720496070415  
POLR2K 51.0225132036905 46.6314009405034 45.7968648044613  
49.1786207920603 53.8260140375214 58.9676332048764 44.4639405506967  
53.7378346199838 53.838484549134 45.2556760873335 49.1067959632109  
56.1875519519366  
POLR2L 99.1565755621214 88.1886407127943 78.6402083787251  
80.1809075683154 106.276392548097 103.856444152519 93.748984888348  
109.481322353402 137.916048669047 112.919063481867 101.434947182387  
88.9641595603127

POLR3A 121.542387231625 150.801729138762 144.227861902786  
 128.70380102034 177.425508756002 146.249568587351 190.77754486426  
 151.438409623226 281.07879968121 179.285390561592 188.432979046693  
 157.433061993786  
 POLR3B 116.253417059012 160.868571611805 110.941686767697  
 106.035435807364 181.200738629391 161.526970033915 111.558107942386  
 169.18132209076 185.924923239764 184.025325436339 170.850089909832  
 107.585504340548  
 POLR3C 344.985739524681 223.1171195512 382.120608305668  
 300.057362423939 224.373975368936 302.422475486532 305.048508698231  
 693.056793637199 352.292837622545 318.234214341679 325.949742917126  
 291.5513298383  
 POLR3D 68.5457752893587 47.087835967892 64.0162246399972  
 52.1201052574162 56.9360840563854 53.2046867327331 57.2758638871082  
 54.3820590274321 60.3977304934451 59.2628513357357 56.3106156221316  
 63.6966761077037  
 POLR3F 60.562215295948 49.2934904960601 48.6037684272115  
 59.4674205670657 71.4183281327686 59.9174456081704 75.5830548489892  
 59.4674205670657 55.2114969675545 67.9259304928255 51.3103617600342  
 55.7067742610401  
 POLR3G 37.0320432433314 38.4757888225478 39.0470836345045  
 37.0732977341185 42.3536549114165 43.4681646416585 39.4916414839923  
 41.5464765641928 43.5140141743856 37.8217989841918 39.6403089864678  
 40.9683275553869  
 POLR3GL 255.559793355361 223.826005691932 345.294930735691  
 397.199620114138 163.946447772618 516.076634990003 145.405415337402  
 339.52415679299 235.613437037284 391.292537565032 310.120875196999  
 479.696469083953  
 POLR3H 67.7831020218081 81.54661427144 57.3500378622989  
 58.8394945317295 61.9058671030777 77.1317865202676 70.8386539994956  
 55.353927584599 66.0846162445352 62.6203392459133 55.8160649599186  
 59.7240416362194  
 POLR3K 112.122619608668 142.221867895111 165.029434090892  
 102.00080367858 146.969565088793 114.190951215203 170.644636226884  
 102.085154509866 142.945182805248 100.756165194192 99.7487400187637  
 127.694844372277  
 POLRMT 252.649651285136 273.108672916862 262.456109739351  
 207.087723777954 433.320698413679 184.808179948172 216.911833562615  
 335.569876624791 343.304521604977 267.475563253966 341.142651038591  
 212.062417120966  
 POLS 217.821858857631 248.963785838427 191.668846959973 163.844659359002  
 175.708718617578 154.730266766226 249.148159759128 174.263925108623  
 209.61080762285 162.735117558467 139.945446129591 151.975559850216  
 POM121 35.5179217192467 43.683792219729 40.1985790927248  
 38.745552403895 42.269054475455 40.244271403831 39.3585350448719  
 39.6474008369935 39.7537274655115 40.2112371512838 37.8372168909583  
 40.5703581862752  
 POMC 46.2231598401576 40.2493681589104 42.8723769353017 58.4476706144086  
 38.1644569189523 45.2852528185486 43.6025443656008 43.6753843488695  
 41.5296458719756 43.3465699185405 41.3945375181463 44.2527566343661  
 POMGNT1 377.221676837377 313.080592198795 406.104588997462  
 180.648144492464 515.856807472321 200.698372627272 255.762638489554  
 364.044597485771 337.948887427898 590.950491348271 437.280601907944  
 376.840175928841

|        |                  |                  |                  |                  |
|--------|------------------|------------------|------------------|------------------|
| POMP   | 684.238999553691 | 637.035929429013 | 626.749986744506 | 952.16345035163  |
|        | 1004.28134410536 | 543.807654287436 | 806.827205415602 | 721.887210480162 |
|        | 728.679189702033 | 484.218958528411 | 449.427251674566 | 692.630044242985 |
| POMT1  | 89.9580440276828 | 79.0276852011359 | 59.0308764112247 | 80.4822328865    |
|        | 70.2288685232877 | 73.688423848106  | 99.7529382840954 | 69.5741225986433 |
|        | 64.9030399249327 | 76.6346767983285 | 75.4732674021193 | 67.8999127712557 |
| POMT2  | 82.5344501505114 | 57.9509155144056 | 61.0370242377391 | 46.8954576545929 |
|        | 66.8733921725051 | 54.8265655909623 | 57.1070449050465 | 59.0262390168156 |
|        | 60.8635925649592 | 87.1434190022564 | 72.308304085263  | 77.0262811825953 |
| POMZP3 | 47.6397712007919 | 46.0713306971594 | 43.9450023643394 |                  |
|        | 59.8102324370568 | 47.9128504683618 | 47.5733603903505 | 53.3111230705754 |
|        | 42.7431359850339 | 38.9834959368496 | 62.5036823572932 | 68.6199296680241 |
|        | 54.720204938924  |                  |                  |                  |
| PON1   | 43.0930293831497 | 39.0102066700839 | 39.0775870687758 | 38.9534635879195 |
|        | 35.7973685350741 | 41.159706131351  | 42.8684958525042 | 38.6454098044474 |
|        | 40.5912213523345 | 35.7202909649682 | 37.2892641289258 | 36.9976231206067 |
| PON2   | 617.271611375695 | 386.00975855841  | 386.372142079981 | 257.851199206959 |
|        | 532.581631305218 | 398.641868389511 | 324.936044300546 | 323.705254926762 |
|        | 416.717470974721 | 243.952697457779 | 229.926637466766 | 222.570136481811 |
| PON3   | 44.0328992213727 | 46.8954576545929 | 53.5698357689852 | 53.0284011078097 |
|        | 53.5594683028749 | 54.5952754712007 | 62.801431502597  | 44.797320243931  |
|        | 160.950554451488 | 79.0249585610565 | 98.0473811574767 | 56.1136936405786 |
| POP1   | 57.1046180136491 | 56.8373628733077 | 47.0940613507321 | 49.1786207920603 |
|        | 74.5758811681995 | 59.7009992986607 | 79.909124697198  | 56.9299697426319 |
|        | 55.0748878261048 | 46.5650556481721 | 46.7386599624801 | 48.5123041297835 |
| POP4   | 77.9057333780847 | 65.3694267397114 | 62.0967404944031 | 54.2886483704949 |
|        | 85.1661952927159 | 55.9351706773613 | 67.1926218405833 | 69.7729022157455 |
|        | 64.830448408529  | 54.1683282066029 | 57.0690683036183 | 65.0495374451854 |
| POP5   | 122.849949163123 | 50.1833483241864 | 68.9522412475296 | 52.7924213633885 |
|        | 148.006731522923 | 96.342767783298  | 109.211407890602 | 92.3307175266839 |
|        | 143.997817398894 | 99.1769280484821 | 119.872031126474 | 115.064217549212 |
| POP7   | 244.678323059428 | 128.327641457403 | 162.908986027874 | 111.877209777434 |
|        | 345.942093303061 | 171.302214895226 | 211.421222959783 | 247.416016413788 |
|        | 243.672418126374 | 125.752132815786 | 120.837993273922 | 129.185046410316 |
| POPDC2 | 47.0940613507321 | 46.7591817286632 | 51.8122261766744 |                  |
|        | 49.5424425850549 | 42.6022652963326 | 210.73006676203  | 39.0458123429605 |
|        | 45.0972184964705 | 38.9006788676407 | 128.521748930472 | 97.3188285021124 |
|        | 124.362644216178 |                  |                  |                  |
| POPDC3 | 36.5393857306744 | 39.0894172982439 | 39.991353369336  |                  |
|        | 48.1662933382789 | 40.9950639693255 | 41.6590564937735 | 48.1747307200218 |
|        | 40.2382908228517 | 39.853866204927  | 37.3179578037963 | 44.3763859390287 |
|        | 36.9976231206067 |                  |                  |                  |
| POR    | 156.088284999883 | 125.027865666372 | 158.862722884436 | 197.720854621428 |
|        | 156.088284999883 | 124.490684428024 | 231.060688044554 | 327.912730756303 |
|        | 374.167501183341 | 162.467159261789 | 187.750540261531 | 119.700522283289 |
| PORCN  | 44.436995101921  | 41.159706131351  | 47.0940613507321 | 47.1332119496722 |
|        | 40.3452320167286 | 46.7386599624801 | 40.9157352260901 | 45.8108990837624 |
|        | 42.6762317063737 | 49.8393069675192 | 47.4630625313159 | 47.3992733452821 |
| POSTN  | 237.039707901886 | 50.9099078696349 | 49.501977696496  | 167.410607476565 |
|        | 63.1780854659428 | 59.7009992986607 | 45.4164642922183 | 47.834436078111  |
|        | 43.9450023643394 | 39.3113207075992 | 44.2142581488029 | 43.9366081640576 |
| POT1   | 42.4607795638552 | 46.4861258030402 | 44.6524308640784 | 41.0726336841311 |
|        | 49.5666074434383 | 49.3731715216836 | 45.1679144865704 | 40.831207953647  |
|        | 48.0563448184655 | 41.2276963324981 | 42.357910063876  | 49.2064066614865 |

POTE14 35.1307934330047 40.2493681589104 41.6079958749402  
36.4564050256915 36.5393857306744 38.7340969861754 39.7576136507593  
37.5511560880902 32.7294532998931 41.5435611403119 35.860430241131  
32.554751989205  
POTE2 40.9141850646578 41.4508241771315 38.3166554965434 42.6222445667107  
37.956732373465 41.6178506967511 37.1643693306382 40.047314525032  
41.1742244762318 40.4518431978241 37.7963032976457 37.5222959113204  
POU1F1 34.9138625012006 29.9775071862804 40.301483914446  
36.9912468186322 32.2133093774284 30.0771630269067 37.2892641289258  
38.3684202018524 33.0463640202858 37.1275334308172 37.1059647239814  
35.8429598823818  
POU2AF1 43.6706764143908 77.0244607682203 88.9928368134295  
200.698372627272 41.467005949568 41.8613406887824 45.3597029614942  
48.6441988290952 43.8482802038826 62.3997407955361 52.5930185400362  
58.5087296620514  
POU2F1 46.9939712192224 53.1278271804774 48.0191002461099  
42.2496337895968 38.1644569189523 44.9896851005259 71.193768715137  
65.1637149462661 48.5792058061372 72.834275688835 61.4121672148248  
48.1627097465883  
POU2F2 44.7044140979108 43.8495248991589 39.2707964550441  
63.9570596163747 37.3508690072156 43.1826328292558 37.7136011474903  
40.2382908228517 41.2870505273664 40.2112371512838 39.4410515050885  
41.4508241771315  
POU2F3 38.385865183581 40.4772513262052 42.3536549114165  
41.7614975630362 44.6202070855297 39.266565827316 42.0605906240248  
40.831207953647 43.1805016690297 45.3894119568143 44.7114813656401  
38.4330755397458  
POU3F1 43.4100411978366 46.1131345131683 65.4137646609535  
39.3455642782085 55.2214187655851 39.7697110924474 44.3440839686558  
40.931294690669 56.1733549054832 103.331104473427 72.1955435994725  
82.2266112813039  
POU3F2 41.678190413467 40.7602938767524 43.0016969050339  
43.1275490164761 42.7107928951766 40.4753617660107 42.9191764437547  
41.5464765641928 41.4397539024976 44.5303781239209 39.8184668132023  
43.0930293831497  
POU3F3 37.7384958256497 44.2105195734073 37.1643693306382  
40.5484717678957 37.2567512265363 34.0045980663271 40.2154497375715  
52.8622615027833 41.9635525160083 36.8059561571675 39.9899430628542  
40.2669497398702  
POU3F4 43.0001432913058 43.5182502375207 38.8775560911841  
42.6913548400127 39.7568367479301 48.4758590019384 40.4359177791566  
42.157627240486 39.0775870687758 52.2256177934134 50.4740079109854  
45.9693232070002  
POU4F1 44.8914371498528 45.1694246393676 37.9482157381008  
39.6292788039793 60.7495043977707 40.040778349137 53.1884505015411  
41.4508241771315 38.3418933808844 35.4990901121893 35.6970528713709  
37.5556299264699  
POU4F2 44.2350046179299 39.6123051184545 40.301483914446  
44.265834798964 41.9842695818285 40.8634043028528 40.5585676679482  
35.3608605269276 42.992884918158 41.5435611403119 40.547835538778  
38.8495095797881  
POU4F3 38.304249186058 37.4540772310118 37.6557714476853  
39.2780515621926 36.08956004634 41.3553369544097 38.8417151851134

44.6107027295193 36.197424053556 39.1621898366355 39.2542963855807  
36.8690774823319  
POU5F1 41.0970259989281 41.9894412416874 40.931294690669  
37.9875302985336 45.6409129284202 38.7578265341627 56.9320717885002  
34.4896350146096 38.3981095229401 38.0078357808393 37.4345152884462  
42.5365257225985  
POU5F1P1 43.4100411978366 48.2521192538861 59.2504637973738  
44.3440839686558 62.3233491851723 42.4155142987678 93.5928272702304  
49.6629259325705 48.0163377492228 65.7002710293248 60.5125774827425  
55.8775622338124  
POU5F2 43.5710871617107 44.7829632472754 46.2625470410195  
43.5627649099623 46.5557478175976 46.7800033479223 46.9929836306816  
45.8669209716694 43.4656637536244 44.1379638573455 42.6366765186182  
42.2577689927563  
POU6F1 40.4639532172338 41.2598458726002 39.9101908547397  
40.9607305725196 39.9697332660833 40.8634043028528 40.9157352260901  
35.2642250366721 44.0519245668737 50.6486940895674 46.3370338074996  
39.4490233720848  
POU6F2 40.6559419616644 36.2103905554984 43.9450023643394  
39.6292788039793 37.5556299264699 36.2768299545794 42.0605906240248  
44.797320243931 32.8704945047196 37.3179578037963 36.7283081422707  
38.6454098044474  
PP8961 40.2087556903277 36.8209886489281 38.1421709520616  
38.5707420487455 39.7568367479301 37.1894304543751 40.0603121770344  
39.6474008369935 40.4997186069494 39.3999056968598 37.2559756339764  
37.925121819624  
PPA1 1704.0522304387 1917.90025587049 1354.50256889331 1343.66876893729  
1645.71527614542 1273.52492984569 1263.76838179117 911.661341702443  
2697.96877833185 605.970682363975 744.762787024945 1673.60994518271  
PPA2 790.786577596971 465.595459259015 634.226367147025 720.552354470517  
362.853023741815 361.776841675393 594.184150517102 1408.59798540643  
410.979796414875 997.492549573274 906.833938613875 740.423874031773  
PPAN 148.016994658777 126.838679504229 174.752830194939 114.520410790135  
357.507822825765 142.55778399096 168.70463124443 136.429803886927  
149.691911022686 110.909109947659 160.672144085068 78.0006681166995  
PPAN-P2RY11 45.1912496459517 49.3581578587582 50.7502704822135  
40.7481155008596 59.9326265577462 49.1013967533186 54.1707158323527  
53.9465584609317 54.113533179847 44.571915452417 59.2106652388061  
52.3896785600751  
PPAP2A 126.336900591139 406.33528162722 503.187121806288  
153.487141102615 251.854446030066 343.764108830519 235.613437037284  
242.673166257518 207.245428311682 229.035497774884 323.576613035353  
329.437593022939  
PPAP2B 211.421222959783 216.63059645927 191.955732544426  
259.626847216881 200.698372627272 708.005870621064 111.714563124738  
150.529917336161 146.287473652123 371.393488010768 376.749116251503  
396.261110334324  
PPAP2C 50.6908854131408 78.6286416672119 77.2574232652488  
41.0726336841311 131.917451557976 53.8014179632737 90.8140983242733  
91.9919654450652 151.047739254277 85.4875375805171 65.963892742019  
75.885672222265  
PPAPDC1A 85.3718124658316 34.9262464079777 44.6032218589199  
38.3166554965434 39.1650142708257 41.4508241771315 44.7255207589606

43.0390857698452 43.5669306063196 42.4594149893798 38.745552403895  
40.2669497398702  
PPAPDC1B 68.0700069295224 86.6854406823303 67.8010199320754  
117.8523906126 93.2630594602634 59.8102324370568 65.7873990226533  
70.355653090662 56.0496524902806 54.6089451252049 53.0798381965427  
65.7853960266587  
PPAPDC2 110.609133094021 110.287699369482 81.6486527718661  
69.8314582428552 89.6313467455698 64.5187138759372 94.6952414258466  
94.5186910848217 96.3232257371077 103.808640431626 105.197692490363  
81.6458112867541  
PPAPDC3 60.562215295948 43.3458769998118 41.3366779545815  
72.6824533717231 43.3332476888305 100.151116279734 34.4570158133896  
47.2009420656854 38.1169703906207 62.58750768974 90.9641417408475  
53.9431600945419  
PPARA 44.5838208750211 41.614274864309 43.6080766584829 43.26160898693  
45.4061964177485 42.157627240486 42.106632087165 39.9576138799997  
44.6809101024392 47.4439407315335 46.68364047986 48.0163377492228  
PPARBP 52.4179224871914 49.9085372049438 48.2883694323339  
73.8480604979804 58.8961770381033 51.0506441018166 71.0369238830779  
94.2678678253657 57.5883027758003 51.6778366958973 64.3824529624475  
57.8111054584154  
PPARD 63.8949010662614 56.7272804480684 56.2000979702695 71.3132890220731  
55.8859157806662 60.5803031036931 83.4172680317042 61.5429260998857  
71.2572485987604 61.5635554619635 60.1466326805616 53.0899789270318  
PPARG 109.607667469015 501.585246203512 421.971171686029 101.317407288794  
522.811631783729 126.753713093485 762.855719373733 496.444080712528  
544.355979695242 395.457351443921 301.594300620246 614.603743904512  
PPARGC1A 46.1673159982664 43.1805016690297 36.8730514568925  
49.5424425850549 44.0451487108213 76.7063975550116 43.0930293831497  
42.6450179841129 39.5806465938526 78.9420136903401 75.2391243965793  
74.4365426051588  
PPARGC1B 47.2862299990938 57.4538469832241 58.637422084759  
58.1798515131249 59.1948983423381 72.0674952635945 45.3597029614942  
56.8094693588238 58.0722340887264 63.0119737420787 67.1477341610979  
61.4366256816323  
PPAT 84.8139090643412 115.63300104804 92.6672238953636 89.0203733091224  
212.090033606355 95.4393274079354 93.748984888348 89.7806631815779  
122.642481894309 75.5861488664745 78.0020909283414 82.0869179287671  
PPBP 37.8386378737561 43.9421822132391 40.4070046183108 39.7411455670172  
42.1650127805175 36.4986986135769 40.3302268293707 33.2467975244196  
34.7722083264266 30.8150126829901 35.6970528713709 33.4316681623175  
PPCDC 39.5676051939342 44.1239711172417 42.9104454767916 65.7321440516177  
44.5668141895992 41.0582900711341 35.0305278582179 46.695848687694  
40.0403898620771 41.6373771565199 41.0808257270221 42.357910063876  
PPCS 419.741944629785 295.473526251997 241.952522667413 241.08817915181  
285.826380698286 334.016152807947 260.426488908824 387.311743342483  
448.196293409768 298.607482741423 285.390768830888 338.586852166449  
PPEF1 60.6825461359545 44.5884811528117 40.7222199182322 43.607701594929  
42.7489468897708 43.7078399718247 40.5585676679482 42.0847226073592  
41.4636047919453 44.5303781239209 38.4251036088595 42.357910063876  
PPEF2 34.9566647540594 41.2214779019897 38.2280071951674 38.9074189954657  
36.2691013181987 40.209110303983 42.1607322031054 35.9489900178061  
37.9273653326866 40.8970401536578 42.7275315121163 41.9741368971524

PPFIA1 142.192315159235 133.453860783605 173.08677862231  
168.640033281185 189.289063944393 129.525395445221 181.298709635609  
169.970634268117 136.125236142909 158.718808397001 143.084029849218  
127.847433799614  
PPFIA2 49.1868644496737 40.2493681589104 43.7630587657205  
48.856176220627 42.9090346219023 40.8634043028528 47.4439407315335  
39.853866204927 43.4656637536244 44.4652605017595 41.7272875295469  
43.6753843488695  
PPFIA3 41.4508241771315 43.3458769998118 41.437237454134  
44.265834798964 43.3332476888305 42.9695585740813 37.2892641289258  
45.5581356216957 46.7760357462635 37.1275334308172 38.2795150354677  
41.5536168238478  
PPFIA4 114.404099081799 60.9755936952178 76.7791768896805  
52.1201052574162 80.9160262677505 38.7340969861754 67.0455170947389  
45.9604707098953 79.4528447794527 44.0409178714232 42.0750889188255  
46.5650556481721  
PPFIBP1 101.81885073944 64.5347406608537 83.6935756500468  
63.3006977162657 60.1422342282223 93.8042295944812 62.2818512646893  
78.4289643729837 70.7522482965051 94.4769283676944 110.684033203048  
92.6169846049935  
PPFIBP2 263.765914589758 1673.60994518271 792.880882528835  
273.849703944739 406.668753694984 169.874602999057 1178.52115916913  
2178.59848996529 1055.00793806075 1876.51621222292 1261.91478863258  
1062.93431683428  
PPHLN1 104.687705245581 109.607667469015 130.039674722115  
128.521748930472 119.82102280033 110.345465371645 115.256208610595  
101.968125485413 176.363810387584 83.877343750194 93.4144098590192  
120.123385036416  
PPIA 57.8765910878975 72.0112676564347 58.5212649095879 54.6089451252049  
59.3611824459962 71.6050174762551 57.1070449050465 40.3357777530419  
71.4864243594056 46.1390887492649 62.436851776671 69.6579723433329  
PPIB 47.5647821785529 49.83247261979 42.2577689927563 41.1886975241176  
49.32293280121 47.4699236780425 44.3440839686558 39.853866204927  
53.1249776278067 44.2580151149956 46.972521499515 46.2625470410195  
PPIC 608.579654909865 172.451522479253 363.527881831453 195.146655512672  
301.025314855652 441.872082665398 157.463465828715 347.420750861056  
704.15545332905 228.439524702578 244.343381048643 322.509777895373  
PPID 40.8681871019812 43.1805016690297 45.3675390992851 41.3027031037343  
45.310660704531 45.4607426241257 40.3302268293707 39.9576138799997  
43.1805016690297 45.1569741609597 45.9104478407175 41.0226232127351  
PPIE 200.698372627272 147.9291840243 191.523447800488 138.67794356779  
193.758357282411 229.547114945412 212.967855232105 159.288478050818  
617.271611375695 137.555275829874 142.34144664795 169.144145421022  
PPIF 52.2236479204029 55.2893984191264 52.8041782638549 87.114638423256  
66.3075095149783 59.1570467228834 49.540449125788 46.9986083378817  
80.7409247380392 62.8201270538435 58.8961770381033 62.0967404944031  
PPIG 106.521012342668 87.3759678085472 89.1115172961797 127.148417780972  
107.827560253663 85.9636350040248 77.4999637278723 97.3443444704601  
77.4186160113063 79.7882961549974 90.5603308057889 95.5530572805104  
PPIH 280.563427715895 188.552900887757 122.531570028682 132.604567913122  
271.744096146509 147.704325041249 286.927016665685 369.797483212264  
399.80505620721 127.213248611204 151.975559850216 184.989940464859



|       |                  |                  |                  |                  |
|-------|------------------|------------------|------------------|------------------|
| PPIL1 | 192.337581451878 | 199.604105066243 | 146.997252473598 | 108.400712514743 |
|       | 239.517996511065 | 143.478533731355 | 160.917024416961 | 114.113460279317 |
|       | 184.65212689433  | 74.8170892324966 | 91.8414653633828 | 144.785836697047 |
| PPIL2 | 44.7646034126487 | 46.857923273572  | 43.1629414479202 | 44.8727287473605 |
|       | 42.4507219660363 | 39.6705473876526 | 40.8600431177315 | 41.9721968713295 |
|       | 46.9022898759811 | 41.6657053704762 | 42.1516028411593 | 43.1805016690297 |
| PPIL3 | 123.138085708441 | 108.479856042609 | 111.153589230866 | 147.165235402905 |
|       | 142.48688219605  | 151.740176274202 | 111.438294720953 | 127.213248611204 |
|       | 191.668846959973 | 143.112509176873 | 123.720102870283 | 223.669853276931 |
| PPIL4 | 37.8386378737561 | 37.4540772310118 | 42.8270038153139 | 46.7577982595088 |
|       | 35.9058393060637 | 43.6670755115848 | 41.0381860307445 | 41.7419877611072 |
|       | 39.7537274655115 | 47.3791873993182 | 43.401782064778  | 48.6037684272115 |
| PPIL5 | 73.5161632100822 | 69.5853093594169 | 62.4171973080669 | 77.3864518736634 |
|       | 76.5960150436512 | 59.2035499250243 | 71.0369238830779 | 89.5998153671725 |
|       | 81.1416376689959 | 48.6709621836902 | 51.5822637582617 | 56.0642694832108 |
| PPIL6 | 37.9387791625384 | 47.5647821785529 | 39.5450079747895 | 42.1273928203021 |
|       | 45.2556760873335 | 47.9503724044453 | 38.8417151851134 | 56.2441895183416 |
|       | 42.4540072551568 | 49.1928206164702 | 40.9157352260901 | 48.7814131120945 |
| PPL   | 120.289145237975 | 92.2946243272848 | 161.268186656743 | 46.3203995372658 |
|       | 111.399831013724 | 116.17887995398  | 86.2118355769367 | 91.7679182632783 |
|       | 144.898757916905 | 177.55994726993  | 172.433936159136 | 127.486023318527 |
| PPM1A | 46.263826584899  | 51.3800036046133 | 57.5741400533433 | 50.7611284089921 |
|       | 54.6089451252049 | 65.6165636276827 | 47.0707618523034 | 45.3389970694851 |
|       | 54.5952754712007 | 44.7401523707775 | 47.1911030693795 | 53.5271601314404 |
| PPM1B | 123.281175151414 | 85.1950626054282 | 95.1224420992193 | 109.979856686854 |
|       | 76.3435517544167 | 85.1981126713031 | 126.302564098322 | 156.497017347274 |
|       | 84.2728210732532 | 106.809028844031 | 103.67004664951  | 115.691017747672 |
| PPM1D | 63.1291723738553 | 58.7111274254142 | 62.0967404944031 | 75.2475238554276 |
|       | 60.8550020364269 | 89.0495215957248 | 85.0342118119783 | 55.1109784383525 |
|       | 71.3932787152381 | 57.0581769379589 | 62.7743500747415 | 63.0266170942566 |
| PPM1E | 44.9896851005259 | 42.7775752471711 | 46.8267540220952 | 43.3078542962968 |
|       | 48.2748123114598 | 42.5660695551615 | 63.3924515518667 | 46.4672637826582 |
|       | 46.4164127487052 | 36.3612409063792 | 43.7585538437696 | 44.3521099857368 |
| PPM1F | 286.538414026118 | 356.503013319738 | 403.243939813779 | 414.794323433931 |
|       | 326.303950252592 | 375.757961593064 | 153.019365845424 | 218.446312290024 |
|       | 138.362914843774 | 276.939964364659 | 270.724111544154 | 216.911833562615 |
| PPM1G | 723.853348464335 | 506.75912743556  | 588.736435715365 | 417.201611973051 |
|       | 977.776395810338 | 466.935292808402 | 1021.71286017481 | 790.094848284547 |
|       | 649.487838020327 | 435.478616005848 | 489.232537791775 | 383.578947165143 |
| PPM1H | 91.1363393944977 | 74.2653431904071 | 64.408176016319  | 52.1201052574162 |
|       | 115.530384771495 | 51.8103411703261 | 138.521956104698 | 77.6174893940285 |
|       | 173.582309251499 | 92.563449632567  | 90.4909052059366 | 123.336184278054 |
| PPM1J | 44.1294459089314 | 37.2810767789306 | 40.301483914446  | 37.4223289687135 |
|       | 36.8059561571675 | 35.4142595025086 | 45.1017494688414 | 45.2806199505029 |
|       | 44.0519245668737 | 43.9450023643394 | 46.5650556481721 | 33.939263369489  |
| PPM1K | 88.5806805188951 | 82.3591293655947 | 87.104092810486  | 122.15017220566  |
|       | 72.2665537421443 | 90.99086730704   | 95.5117928427637 | 118.49449420132  |
|       | 68.2372031645261 | 132.341766267192 | 115.801367301965 | 113.491158368594 |
| PPM1L | 44.5282181324797 | 44.8529259387308 | 37.9482157381008 | 37.29566077996   |
|       | 42.7982502551634 | 49.641159251878  | 37.4772922422734 | 43.9366081640576 |
|       | 44.8003345643334 | 43.844855336215  | 45.1432412071268 | 42.8864415494484 |
| PPM1M | 172.506486240017 | 167.430013807712 | 174.752830194939 | 576.367042159347 |
|       | 136.272019225585 | 332.830805115112 | 171.073367662623 | 164.62751527755  |
|       | 154.93193897888  | 399.80505620721  | 256.675896425075 | 238.893145911331 |

PPM2C 50.8388984085636 47.2055133646385 38.7745734037492 38.9534635879195  
41.6806984441849 42.0574848021044 44.6032218589199 43.7396619462033  
43.5669306063196 51.0055825931636 52.5154971256566 44.4475838947656  
PPME1 258.589426470951 251.374750265492 191.223290474417 121.104663867264  
244.466972245417 149.076166432567 416.246271724181 231.893992191022  
333.493839176426 253.764071470001 220.977092747428 193.262615637464  
PPOX 131.277614500948 100.774098314706 163.028918580618 86.0630164348952  
162.424734330982 87.6507489853626 131.645714321903 146.287473652123  
235.420582508332 182.49650467392 123.190887747662 108.479856042609  
PPP1CA 277.367257933324 500.549865625701 556.572994352617  
391.397318564183 400.760646547012 214.537530518962 585.421238639853  
258.038442651578 532.043503787542 223.850148640071 243.952697457779  
240.696431900526  
PPP1CB 133.558028920419 175.550329937952 162.049698241573  
227.404530886674 130.64028226556 297.404152949522 191.811190401876  
132.007307754378 189.984886903595 270.922452389109 255.800286504974  
255.986778613019  
PPP1CC 589.912813291296 888.56944380788 657.59007878546  
563.750309421406 1370.76188322111 864.302844775203 759.184121753305  
530.996217072759 1118.62223628039 601.139894733857 654.682263833024  
681.850915393461  
PPP1R10 188.887559923238 168.073605090354 137.034037711549  
263.885462100853 174.148714092395 111.532958750074 200.93077689667  
206.337508331566 179.267796142741 268.613247119583 232.944023917808  
131.238796973323  
PPP1R11 1219.52011418558 1016.13142851085 1001.99175009124  
1099.52344340557 1012.91803181784 934.48498309932 1120.83891847181  
771.554891868456 618.293140877956 873.451893437179 955.088515235485  
1223.01485352248  
PPP1R12A 56.0477607422828 56.9312835667828 59.6565330440648  
60.7741670229412 48.3814421939888 113.46454061183 58.6431245059655  
58.9081750508316 76.1869593072029 80.2774079897733 77.2834482217973  
102.163854544231  
PPP1R12B 53.7079631941275 67.7189686993694 57.6371756925687  
54.3753177017125 51.5888395924843 220.054040993848 49.1928206164702  
44.2527566343661 54.6354070737962 48.0211752672327 53.1969158492842  
104.704892803169  
PPP1R12C 47.0940613507321 58.3627863274274 54.9944485073259  
47.6687908290818 77.0301627655229 80.9821967801845 50.0088611244948  
57.6684494624163 51.0062122023297 80.7338782543351 87.4850071876743  
77.8620267163666  
PPP1R13B 207.710354513208 105.563773939475 269.582598918998  
126.911056987607 202.360546931172 221.383645621978 169.527304857688  
200.615897175992 514.70012608304 652.480459437977 564.929183025034  
311.901423694475  
PPP1R13L 156.382146982116 246.568253751149 407.336051853854  
49.9014504704021 143.962643695789 54.4753345912615 147.405190988088  
140.076084766156 358.498678171092 345.443895623911 247.676607756929  
204.710892826638  
PPP1R14A 111.954989477689 182.411383422586 206.08791147394  
172.624182951104 200.986069552443 2424.0414102425 78.3082773071531  
144.324036829708 75.1328739717464 973.363245512859 868.899376368472  
1377.24483375075

PPP1R14B 696.946621824188 1839.09068171097 1082.73916102398  
679.810781641519 2417.02418518222 867.856842601788 1693.5377672895  
904.122237964854 1418.94307844471 699.488969175268 787.951838387453  
723.853348464335

PPP1R14C 157.06144940334 40.4359177791566 39.4710743516517  
62.1776700757427 39.1650142708257 42.0574848021044 39.4600924554505  
51.1694248620208 43.5669306063196 39.6719190054379 37.7384958256497  
39.6352613956998

PPP1R14D 168.036319777283 46.5650556481721 44.8872784170036  
55.8709511400674 48.7288537840562 53.9517841438975 40.6750540874299  
49.085741080241 55.8510296341925 48.2596564318071 45.4799270968969  
48.6037684272115

PPP1R15A 925.486088550061 1718.44944271916 782.28158356937  
2506.05102956991 1231.77360353254 2598.78910128081 1981.03929621057  
2465.65854657837 976.566026758227 1223.01485352248 1806.22468459769  
964.268294825556

PPP1R15B 42.5193208629123 43.683792219729 40.6312687664188  
45.9441733841041 45.5198200633333 44.2321845867179 45.4799270968969  
45.7003272484265 41.7627910693483 44.1861590259178 45.6706505553383  
45.7206695113999

PPP1R16A 161.910748720932 269.546586017659 112.007118067348  
48.9944486068347 119.965950077259 68.3234331335073 99.7529382840954  
73.2037966614621 124.350816245276 86.8691342571214 68.5370732645926  
86.6105153696374

PPP1R16B 46.9939712192224 100.326655761429 76.1493261430901  
172.237164781821 45.5809132232681 71.6050174762551 51.1541843174981  
68.0342444360948 41.7627910693483 48.3693338695392 51.2318935933116  
43.2776458914333

PPP1R1A 38.385865183581 42.8542642792862 40.931294690669  
42.0102671859606 43.5544347011646 97.152024864444 44.3440839686558  
43.844855336215 41.9635525160083 51.5855515705917 50.7903824729818  
41.0657892043496

PPP1R1B 241.017227991238 47.2770121962655 65.7321440516177  
43.9577120438279 49.760344214067 59.4212529620447 114.148080724618  
53.4109882045447 772.368030410394 217.875223856197 196.17328008185  
115.509409633975

PPP1R1C 37.7384958256497 42.0418171513817 39.2707964550441  
36.9340272794969 38.745552403895 37.4526668764931 37.9430145836712  
39.700936357233 39.7210115145672 39.1621898366355 37.6122808321894  
38.2849674251075

PPP1R2 164.612971085488 169.168332370229 157.856158440506  
169.582135138401 138.728648830528 210.133037772969 163.20801480093  
177.047048502104 159.973746908596 188.900125060451 195.146655512672  
188.928047145068

PPP1R2P3 44.5282181324797 33.4967065724734 40.8420925848403  
39.1706564265495 40.6723334103791 40.5281496800812 43.4544762830742  
35.0510338774593 36.8127605061228 41.4397539024976 37.2892641289258  
35.3525469364579

PPP1R2P9 43.3638918705225 37.2810767789306 38.8775560911841  
35.6027791404152 35.9894133432376 37.2686490268265 35.1307934330047  
39.853866204927 40.9901805728485 41.9666541498638 42.6366765186182  
43.8575940017119

PPP1R3A 39.8662795144616 41.8073910693411 38.941855825269  
38.5252456306656 44.2120774064277 43.9366081640576 38.4005795891396

45.9604707098953 39.2497056720346 41.2276963324981 38.4689132737495  
43.0322714179517  
PPP1R3B 43.8582747295766 44.6918600441328 49.9256753636167  
59.6153684374766 42.8510579683751 49.5923712603197 44.0687697278114  
44.4475838947656 48.27609330316 44.6918600441328 48.5292718280498  
51.7833333848627  
PPP1R3C 126.897002134472 340.662853333208 927.921867516809  
85.1847490113446 446.757901018137 404.356143472409 562.531738167208  
328.295200683554 289.843931942051 428.8440159628 371.513106715598  
180.065047496273  
PPP1R3D 65.9273663561152 84.6158251687884 71.3527183280827  
75.0377156190383 81.6486527718661 82.4900927793125 78.0020909283414  
63.1604223919703 98.1495112518979 71.0619469948187 63.5195937348531  
76.0240426902567  
PPP1R3E 64.3502363726659 58.0218262176065 106.762097616497  
62.1776700757427 58.9875400392427 52.9482338979681 52.7002314230604  
49.2019743609873 61.8445915808329 80.3915591207869 67.5417980425932  
59.0894921452893  
PPP1R3F 66.3095900379311 58.3164247463092 52.9111155236961  
52.8502823653368 52.0583273941813 65.3801154142721 48.0283573444179  
69.1973371867031 69.3300058073438 63.0119737420787 66.0282565447846  
63.3974067065125  
PPP1R7 213.590067519021 277.284338888467 331.173265739654  
222.617854741466 129.096406048173 370.150839052727 230.554867472663  
246.20973320244 290.81245174957 231.417150220669 281.141138830497  
214.427113386942  
PPP1R8 73.6362523983338 66.8026147385682 63.9148277361329  
59.0965219753805 82.4975645442705 76.8027974030779 77.0514384834854  
64.964255000378 80.0733119200914 59.6565330440648 57.8497388356952  
65.3121096212536  
PPP1R9A 44.2350046179299 46.29198852834 48.4890615340603  
42.0102671859606 43.1252272136667 47.2009420656854 51.4349390827895  
56.0496524902806 49.7336769474446 53.5498255316009 56.1379957867124  
48.0350549043063  
PPP1R9B 36.1232327599945 46.6996902348633 42.157627240486  
35.49696651597 41.7929491793697 41.554942319225 42.7431359850339  
46.9986083378817 39.5806465938526 38.528621456378 44.0409178714232  
39.4490233720848  
PPP2CA 1062.93431683428 773.781266760336 784.268074988084  
853.464809072841 832.181997440212 691.132727131746 696.946621824188  
933.968759959712 911.661341702443 783.440408023061 786.57695312967  
865.63777294494  
PPP2CB 143.875527523263 110.960501850409 184.65212689433  
129.785929766258 93.1850674428555 295.841196113053 120.807573842238  
80.8078050043929 118.762101740563 102.559678338485 131.319040057576  
204.039190380778  
PPP2R1A 885.224377292125 1132.19026676901 1147.19483787501  
698.595302020108 1064.35745220225 971.856840043688 1549.93897368117  
1164.71243740122 1658.86829668934 2004.94135236716 1716.82239359769  
1110.39060103557  
PPP2R1B 49.7363778831003 62.3102413989199 50.3334140358007  
48.309866878365 56.6699078331018 46.263826584899 52.4793441959524  
56.4506749914215 56.7535625723802 48.3693338695392 45.8180710486329  
50.1579724208315

PPP2R2A 314.924656469102 210.005571009784 394.764369100963  
322.109212713082 203.82788889213 227.059460958349 230.142262693206  
143.215491185309 283.036694859397 435.901460958456 328.855843739232  
472.159979716705  
PPP2R2B 55.9563971339766 90.1080159649841 73.0128142320238  
72.6125001209288 140.976643799742 158.718808397001 152.86270446968  
82.7853677822046 156.95090716929 229.881790983135 184.001671627062  
214.073500272341  
PPP2R2C 55.9249770393176 40.3384318592985 43.6140455003784  
40.2455972565968 39.382148430786 46.6872654833579 40.0052661202207  
55.5578334877425 40.953899008715 40.7568164083581 42.5023941254529  
47.1762002933265  
PPP2R2D 99.3956523785983 152.76005226611 133.314819245044  
128.070047614488 113.107942979653 150.405742308999 140.992072231913  
192.216758313982 107.015362116555 128.04037427867 116.865693104968  
96.0126406688619  
PPP2R3A 54.4825201506931 46.3390850717989 49.3365668228163  
53.2046867327331 47.9128504683618 57.1347479521219 51.2171026427689  
58.5831897269778 54.4586176399381 65.7321440516177 56.6303547065929  
55.823130565111  
PPP2R3B 69.9872801240574 77.3367966395554 61.6183748238619  
43.7509341846346 67.7831020218081 68.9562915755919 118.010166045155  
143.653706909456 78.1040551228844 67.2437599548936 65.1496567852393  
61.1738323289359  
PPP2R3C 103.808640431626 109.155021443311 118.155986485411  
246.274692971423 73.0070079786149 183.002191434723 114.657635596229  
93.7090094630558 99.1438953564062 112.436153468759 107.154549409927  
149.24022100428  
PPP2R4 218.917221711155 148.758736522703 102.020047144427  
114.657635596229 110.487281983469 93.879589378061 167.47269732721  
128.024853362102 165.029434090892 123.46775722643 110.818741525514  
96.6957892186886  
PPP2R5A 207.380865650247 179.874652000664 270.156612086731  
232.516262874696 136.875335055866 311.668075784386 154.718907273467  
265.930422462959 240.314054155006 324.936044300546 264.161390133378  
247.47601939651  
PPP2R5B 81.537796828766 61.3428092991286 75.651446553407  
91.7068354379889 85.5362566454799 97.9586375307737 59.1774824918359  
76.0709828871754 75.891637602914 83.2925226467532 84.7058085717914  
81.3082994649699  
PPP2R5C 132.37539586883 99.2100734209486 158.408644964483  
155.123252685926 139.204639906937 150.661852768073 137.156113501125  
125.735441231594 130.960165577212 83.2925226467532 86.3793067659925  
125.786923817078  
PPP2R5D 91.4786089554886 90.7255100542123 72.1408243034509  
60.0765286625112 85.4420599474339 82.8888969977394 97.712117589297  
65.7457567201236 96.3918711895208 94.5261917871909 92.8710333019594  
70.8835636550472  
PPP2R5E 267.427827956058 260.062749979574 328.63511311303  
327.912730756303 268.683528469759 387.631477822638 274.081959734368  
323.453481668415 291.64206171681 239.117228656704 245.888237156849  
335.330937634207  
PPP3CA 43.1267841876606 46.0023068797812 54.6414321010929  
55.2214187655851 51.7983110178095 50.164201758929 45.3597029614942

48.0283573444179 54.5952754712007 46.441301934328 50.6229884142872  
55.8087097725119  
PPP3CB 315.139359883556 293.258858033133 277.367257933324  
484.050852319927 120.136330103936 789.511653564341 185.924923239764  
173.582309251499 509.463928291526 662.848386826617 534.629009719855  
519.775555680262  
PPP3CC 138.50445813694 95.4533981420022 81.8648220673828  
160.056757080676 82.9322141700549 145.583868248675 63.0119737420787  
76.8393340617473 76.4796910268368 114.321083441061 126.546330358591  
160.283895105835  
PPP3R1 293.944796522337 189.984886903595 148.32293918881  
131.738693662183 188.670053901101 146.299417934358 90.7037473522607  
124.324905704041 181.705809767061 147.209004629384 186.477689350702  
125.154933118907  
PPP3R2 37.55264801907 34.3715326040967 39.7411455670172  
40.7481155008596 34.4570158133896 38.6414316877471 41.8315602975157  
38.2782436497441 43.7630587657205 41.4397539024976 38.4689132737495  
40.6614700944853  
PPP4R1 333.566613571224 253.841638589385 293.755623192857  
365.723799716137 230.927097824131 211.451463038315 333.648836970147  
408.991719312986 454.402224020514 293.217518524507 273.934014944673  
370.330147221688  
PPP4R1L 41.9918605927928 41.2598458726002 42.4580504587581  
39.066284740632 42.3474554878621 44.0399598874356 40.1613888954735  
40.831207953647 45.8844325913247 41.3641352453779 43.2551508830106  
46.0633179231318  
PPP4R2 44.8914371498528 42.9358255168086 43.0016969050339  
48.856176220627 42.269054475455 41.8613406887824 43.8206425661746  
39.2672712041774 46.4164127487052 41.2276963324981 49.1868644496737  
43.2776458914333  
PPP4R4 38.0089018744739 39.0102066700839 39.3260254992968  
40.137818555383 38.8456942580061 39.8455060654531 37.0011886211643  
38.7023886970298 42.4864576619427 38.4699622716254 37.6484782516569  
39.1553169409075  
PPP5C 38.1169703906207 38.6414316877471 49.9256753636167 40.1804147506786  
38.0598374201407 34.1806289878747 32.9962272670005 38.956280281655  
35.6970528713709 34.6720534245631 42.6366765186182 37.4554876386402  
PPP6C 633.819901764391 694.590958116425 478.296779356592 744.080606078086  
570.824732318332 583.421166842011 745.219025960188 801.694261678224  
471.874412428677 678.684833360104 553.707482409148 629.074729375018  
PPRC1 158.532307373857 231.304658157247 202.360546931172 156.69976952483  
243.609178976074 186.600931545083 196.666585862505 229.881790983135  
188.552900887757 197.868575583033 231.893992191022 223.911125639211  
PPT1 888.56944380788 516.076634990003 501.585246203512 1252.94510628089  
653.880422442079 704.601607617837 637.824136761292 1000.65752290829  
1048.98028527123 720.183703120662 691.132727131746 703.315796616275  
PPT2 57.7494596863439 50.8812920005251 58.47356854625 51.3851157261451  
72.1154333023225 55.0474662429609 51.6869155634183 48.8467058855408  
50.0822130724389 54.2445399731644 47.3791873993182 50.6915708372926  
PPTC7 57.1046180136491 90.0420794458477 85.5839487225537 100.774098314706  
120.136330103936 107.91849682084 90.2915974511786 53.4109882045447  
102.87193290903 65.6721629145797 88.2314365506494 98.7331384143685

PPWD1 115.454858442166 134.489077146096 165.775214685061 133.541341560868  
140.076084766156 129.81569370219 82.1144251872199 74.9541456286637  
128.616776019243 84.7642634532073 87.2316853416374 109.492219458129  
PPY 38.0089018744739 39.0894172982439 36.9795961564828 40.3180310664156  
36.3390947880186 42.4580504587581 37.3799542961839 36.9355798143571  
38.0213051227859 41.2276963324981 41.0050831223107 38.4330755397458  
PPY2 37.7384958256497 41.554942319225 39.2707964550441 41.8778873678551  
42.3685136297603 39.7394181011603 39.8695929627783 35.9023742468744  
34.226171989766 36.4651112441576 43.1931731665131 40.3691324547049  
PPYR1 45.8108990837624 36.0366673493555 43.7630587657205 42.357910063876  
36.7356360093603 38.8336427948187 43.6753843488695 36.6452480995946  
41.5635499110307 40.8970401536578 40.1742127891824 37.4554876386402  
PQBP1 98.9767421163141 95.9298109273155 93.5717680539357 108.525500270474  
91.9685593100867 146.701131209299 127.694844372277 98.5339473137891  
142.714450804595 119.124583755587 116.530589514041 99.0545942554244  
PQLC1 576.140066807763 710.579735673002 562.531738167208 765.145138238955  
332.322497133752 616.912306849151 444.471597593258 279.226221967169  
627.914461428624 561.509463439533 504.281506941044 444.471597593258  
PQLC2 45.162170179003 46.458322009085 43.3085358214154 39.4469765850607  
40.8270141118472 41.7309289572934 45.6782637989541 44.0687697278114  
44.0383630714326 43.7742438155856 44.8385309082825 41.5536168238478  
PQLC3 385.512974999198 203.373397813051 200.958421322871 304.258586051126  
176.991120397205 430.283061862756 185.618644212826 575.268446033282  
118.251739134889 201.530434441408 220.85458646522 235.613437037284  
PRAF2 51.1740855632044 49.3581578587582 46.0727230219512 47.8164193292842  
48.3814421939888 55.9351706773613 69.779139490544 63.3768687067745  
58.7382738968248 59.1496467460507 58.133863696399 58.0218262176065  
PRAM1 47.3791873993182 44.3529919625344 52.9111155236961 138.336991036544  
46.0043807840705 44.4619248757502 49.6872467499977 47.0940613507321  
38.6322728994674 43.401782064778 48.2910530887214 46.0633179231318  
PRAME 46.3810615657263 42.985929467107 49.3780606970538 50.9643363406241  
71.2787833369055 47.7139826230176 51.0889740983457 66.5234828659154  
69.7610390623756 44.8522313252892 50.3617784914188 48.27609330316  
PRAMEF1 39.9255915839379 39.6123051184545 39.4304889666789  
40.3589492801501 41.8503210829559 38.6414316877471 42.442231667357  
42.357910063876 39.7107284579423 38.2496050953547 41.9594153733826  
41.0970259989281  
PRAMEF10 44.3734692860793 39.6995529770239 42.0621425894624  
43.4812166409346 41.9397336249742 41.5083179498332 39.8234920704779  
39.9576138799997 42.0213951903753 39.1269447164792 40.6373400186325  
42.3288275690551  
PRAMEF12 39.6609238036815 35.6434124419782 37.0642268327439  
36.7892997857376 40.0599807618105 36.6996187567892 37.2892641289258  
44.0390019242862 38.8271346375425 41.8613406887824 31.859589438824  
42.2577689927563  
PRAMEF16 39.4710743516517 40.2493681589104 44.7829632472754  
43.5627649099623 39.3667161654772 38.8336427948187 39.8695929627783  
39.1652965788406 45.5779686360641 36.3612409063792 41.9083581529276  
43.4709415392696  
PRAMEF17 41.1523487516364 42.8542642792862 40.8420925848403  
40.9607305725196 40.0599807618105 42.357910063876 39.5496902678788  
45.9604707098953 39.5806465938526 39.0648733099061 41.6336636285875  
38.8495095797881

PRAMEF19 48.7646976789783 40.7952353240579 40.0998167098057  
56.0794100106654 47.6884372645373 46.263826584899 40.5585676679482  
40.6171774724171 43.9450023643394 44.3648993568405 46.8954576545929  
41.3481355128089  
PRAMEF21 45.2875173643252 39.0102066700839 41.6977706798234  
42.357910063876 40.148780650831 35.6125439901743 43.6753843488695  
42.2577689927563 39.5806465938526 42.3606390470387 44.8872784170036  
39.7411455670172  
PRAMEF4 38.304249186058 44.9863726205428 39.2707964550441  
43.4410741327254 37.4470183315826 36.2015763253919 41.0871827071116  
41.4812544772644 40.8420925848403 43.9783383422823 38.3166554965434  
40.9149601380325  
PRAMEF5 46.6348258763289 45.6948619492056 46.3411353377615  
43.9282059368202 48.3287893866569 44.4619248757502 42.9803717121865  
43.5752393599169 42.7150227340364 44.1861590259178 44.2527566343661  
47.4699236780425  
PRAMEF6 45.9090659324223 39.5050383901884 40.931294690669  
40.8681871019812 43.3332476888305 42.157627240486 42.2577689927563  
38.1835938174625 39.3750969348308 41.0057887014368 43.4709415392696  
39.8497227447888  
PRAMEF7 41.5787026298957 39.8299340037009 43.6080766584829  
41.1449845929724 42.9627566278041 41.2040352443154 42.4550559210442  
42.8036731479932 40.8351751854504 43.3523899508716 41.3277288245157  
42.0778399888414  
PRAMEF8 47.1962846565261 43.5873188565519 41.8751578329365  
35.314469458379 46.9906120932727 45.0882356578404 38.4005795891396  
45.2806199505029 33.9456837661864 38.8507804383261 43.5710871617107  
40.5703581862752  
PRAMEF9 34.6977013306396 46.8954576545929 36.4564050256915  
35.2143190355414 37.6527901109005 40.040778349137 39.7576136507593  
38.1835938174625 47.27543600687 41.5435611403119 46.4205654140754  
36.5474283500601  
PRAP1 41.9407041937973 40.148780650831 41.528370959196 38.5252456306656  
44.8897737954573 43.4681646416585 81.8569832022381 41.1575777497576  
63.2753814090696 43.7303813515864 42.4580504587581 45.0035308952466  
PRB1 41.8409927585705 37.0431286518306 40.8833572570383 41.7082242184693  
40.0599807618105 39.6705473876526 42.7982502551634 41.4123755032424  
39.1507435605516 39.7453420559776 39.5748670524951 40.1179210534118  
PRB2 39.0237504776589 42.6939394537076 41.7419877611072 39.6705473876526  
43.7517118200398 41.4508241771315 54.2445399731644 48.0582855095143  
41.9635525160083 44.6305275729869 44.6286581923295 43.0930293831497  
PRB3 44.7520317855773 48.551327455445 44.1452943804044 48.7646976789783  
44.7210190486327 41.408887993053 42.8036731479932 44.8997235283254  
47.0804681460898 47.9056710878325 47.8284278211109 44.2527566343661  
PRB4 36.9060997041453 41.2598458726002 43.9450023643394 40.7481155008596  
45.8051846088552 38.4330755397458 42.7431359850339 37.1317006162938  
37.9273653326866 37.6383530120621 39.9070785037411 40.6614700944853  
PRC1 431.168903637888 468.267514612816 186.042094228091 131.955454394903  
619.337575854369 111.240804216088 631.371154527474 422.58866112053  
479.696469083953 66.0786923699684 56.6884575165011 75.0873720488265  
PRCC 131.57403028894 116.094881058504 134.113913870501 108.558977253184  
191.116764060948 106.679905803492 136.155022329495 108.463445585898  
126.456130365187 105.828093778276 102.170521765252 81.8491450876942



PRCP 518.936896882424 477.924466983414 739.541009338849 1208.33498233518  
447.579367889737 751.953794043451 481.905052451245 615.011590811277  
579.038638774301 1311.88650141004 1126.31998762007 1109.17675353971  
PRDM1 81.9258201510475 80.1378352697519 64.408176016319 174.469283513638  
64.1115554272944 48.3119523820103 51.688369435871 117.260454792593  
54.8439819445945 51.6269167162548 64.7023558190673 47.7508139534968  
PRDM10 75.2150154717572 89.6670947876322 76.3583555666815  
86.9274372004388 78.5468300294626 64.4065381524425 69.4677195088043  
68.8698243753339 80.1505160355175 75.7502062965698 70.3757673501097  
87.3429006429216  
PRDM11 40.4639532172338 39.6995529770239 47.4740726032707  
45.1944222548351 40.148780650831 39.0266821712099 40.4359177791566  
36.8400213077707 48.3119523820103 45.4614234442527 40.2649309204478  
40.5703581862752  
PRDM12 36.8072833828297 38.1312950900467 38.4043916290561  
36.5393857306744 40.4639532172338 38.5252456306656 37.1643693306382  
40.6171774724171 39.7537274655115 40.6022003765153 40.3452320167286  
33.1559412791294  
PRDM13 41.1523487516364 44.9370339275041 39.7411455670172  
44.0451487108213 36.9702228618069 36.4986986135769 46.7100796279384  
39.5466975353131 39.2809305246091 33.6902293666089 35.4386677371439  
40.4639532172338  
PRDM14 41.3785995857154 41.0226232127351 43.6039443285137  
42.6913548400127 38.9919142475596 45.4882438975269 46.3057385979341  
41.4508241771315 44.2607789091176 40.6022003765153 45.9725715538987  
41.7072675309997  
PRDM15 44.1294459089314 54.2924642952939 42.2577689927563  
43.1847628331565 42.7107928951766 40.650742261428 41.253645578517  
39.5466975353131 37.9273653326866 39.2623423164488 35.9563099719284  
43.2776458914333  
PRDM16 40.148780650831 41.7580695908553 41.3743834747446  
40.5824352835642 44.8457078326832 42.7982502551634 48.7484213234388  
56.1754317648502 44.4869533862292 43.0363146912163 41.4804784667387  
42.3088912845101  
PRDM2 53.0665221694903 45.3770162110587 43.5367669381526 42.6913548400127  
48.6795178347248 49.6064426559054 43.8664428040913 48.514377231419  
44.7699099047043 51.7969043150741 49.9890328304193 50.3118072462443  
PRDM4 171.501864800548 145.819204020818 96.213791081731 102.706563820232  
101.156215957297 114.243522751687 134.908982962131 120.850874262069  
121.270627995568 129.434864701718 120.980558571109 112.436153468759  
PRDM5 43.4626049853157 42.9358255168086 45.5883690965192 38.745552403895  
49.1928206164702 39.0266821712099 43.6753843488695 41.6466169548846  
43.6670755115848 39.0648733099061 37.4642807402741 45.6692241948108  
PRDM6 52.310270746917 43.0227387991135 54.1637401903523 48.4916117779992  
43.5544347011646 113.090530993447 46.9929836306816 52.7787010032051  
48.8842909466002 60.2877434874622 69.1945249877407 54.5921287593554  
PRDM7 37.6397652536077 45.4143854024453 41.6977706798234 36.7892997857376  
36.7356360093603 40.650742261428 40.1235656101329 43.3262148375525  
36.7267557061938 41.0057887014368 39.2542963855807 36.5474283500601  
PRDM8 139.08163074096 65.3694267397114 95.913238814854 416.052744271365  
73.3533274030352 161.817972012879 86.0796981361148 66.7530718914083  
72.5993974280876 116.891649452816 187.01452011215 94.7008981904016

|         |                  |                  |                  |                  |
|---------|------------------|------------------|------------------|------------------|
| PRDM9   | 44.6717213146407 | 45.4143854024453 | 45.0985088502363 | 43.607701594929  |
|         | 42.6022652963326 | 43.3269087731399 | 44.6809101024392 | 46.6384636367629 |
|         | 43.5669306063196 | 45.6355219961567 | 42.8263096141654 | 42.357910063876  |
| PRDX1   | 1939.66920192372 | 1575.71609894038 | 1991.4199819544  | 1744.56688411113 |
|         | 2348.48320928245 | 1595.69503047506 | 2091.0611913538  | 3124.84336032646 |
|         | 2779.37660132136 | 1564.55598228713 | 1549.93897368117 | 1686.40194722823 |
| PRDX2   | 294.849830545881 | 475.310458821086 | 368.793978305607 | 135.138667957956 |
|         | 693.727004855319 | 294.7772562683   | 437.015713629277 | 335.330937634207 |
|         | 596.384327208699 | 166.233911320677 | 192.264432082651 | 349.589955244523 |
| PRDX3   | 311.502922515027 | 533.468347491982 | 666.265306908449 | 496.163796158189 |
|         | 568.905368101326 | 593.345148568451 | 526.146757036152 | 243.06561740595  |
|         | 437.84407370064  | 172.039289618908 | 234.308728996238 | 647.297964303385 |
| PRDX4   | 557.455966274117 | 610.853753376105 | 585.054570630252 | 1249.41227924272 |
|         | 533.468347491982 | 457.502917254598 | 1045.20336057833 | 468.153823329361 |
|         | 652.480459437977 | 295.25359816523  | 258.212981181513 | 473.223156200183 |
| PRDX5   | 1485.68317899614 | 1549.93897368117 | 1985.3999418878  | 1401.46625360427 |
|         | 1670.01014610464 | 1686.40194722823 | 1975.28674300761 | 2167.91218703382 |
|         | 2393.42629339901 | 1991.4199819544  | 2257.78227736778 | 2745.8277126123  |
| PRDX6   | 1459.69929955338 | 983.200149701633 | 1426.87261062373 | 820.147156401172 |
|         | 1848.50311456636 | 1362.12587130194 | 1291.71781703042 | 880.992328229414 |
|         | 895.735191953679 | 1362.12587130194 | 1184.75786736273 | 1413.36279821142 |
| PREB    | 115.691017747672 | 79.8196996067124 | 89.4747568145717 | 89.6115806694241 |
|         | 118.251739134889 | 100.241349942126 | 97.5962784863854 | 183.66684597416  |
|         | 84.673375308972  | 68.6095266659765 | 80.2381651206227 | 90.0942781313264 |
| PRED57  | 44.8914371498528 | 43.3458769998118 | 41.9666541498638 |                  |
|         | 35.8472302065546 | 46.6397391251762 | 39.3841861812262 | 39.8695929627783 |
|         | 43.1567024035183 | 32.7294532998931 | 44.6918600441328 | 42.5426057453993 |
|         | 41.5536168238478 |                  |                  |                  |
| PREI3   | 87.9871827215149 | 151.255948388415 | 131.307600147917 | 97.1406120094484 |
|         | 139.022985518859 | 132.059215102854 | 86.277692569799  | 97.2124452343726 |
|         | 96.9051967257119 | 81.2228688683149 | 95.750422489231  | 117.191735492199 |
| PRELID1 | 424.709002690579 | 303.818507395434 | 277.731146253511 |                  |
|         | 465.595459259015 | 328.387270297393 | 336.274792875582 | 400.506633704584 |
|         | 376.840175928841 | 562.798580332885 | 339.313853828248 | 372.330242931581 |
|         | 334.90764380842  |                  |                  |                  |
| PRELID2 | 46.9395507483816 | 47.3010040326346 | 45.4865173433646 |                  |
|         | 42.6913548400127 | 44.8351976221735 | 40.1930209223556 | 56.9320717885002 |
|         | 48.4670130605028 | 47.8472928419101 | 40.7620472083159 | 50.8826620053386 |
|         | 48.4535991392809 |                  |                  |                  |
| PRELP   | 44.7044140979108 | 43.3458769998118 | 35.4729603570946 | 42.6913548400127 |
|         | 44.2607789091176 | 73.9986015964321 | 43.8835874380262 | 41.6916508480321 |
|         | 41.3803269429468 | 79.0249585610565 | 70.8088594316677 | 69.1743062945144 |
| PREP    | 490.301992866742 | 291.5513298383   | 193.15756263121  | 209.497482517298 |
|         | 118.638732417836 | 169.874602999057 | 141.131275984303 | 134.537040608687 |
|         | 153.42135363926  | 244.109166881519 | 274.962689159729 | 227.243009473121 |
| PREPL   | 95.4841914842335 | 91.2647023876304 | 110.272925554245 | 73.6679006272617 |
|         | 92.3034609409756 | 143.098268804553 | 102.150058925164 | 127.486023318527 |
|         | 97.4062608315831 | 121.945468001236 | 146.087016079575 | 121.696160351886 |
| PREX1   | 46.263826584899  | 57.4054069675016 | 56.3471340054074 | 117.699959435983 |
|         | 46.8674366115656 | 45.3882138838137 | 48.3411413510851 | 49.085741080241  |
|         | 48.9931786790166 | 48.3693338695392 | 49.8393069675192 | 45.6692241948108 |
| PREX2   | 40.7063426028871 | 40.1989248349075 | 41.3366779545815 | 40.0195349109823 |
|         | 38.4113893955425 | 42.9090346219023 | 39.7576136507593 | 39.8048943625718 |
|         | 39.7210115145672 | 42.8482181313226 | 38.3684202018524 | 40.8254641406268 |

PRF1 79.5531316151328 62.0908175930716 75.2977438265751 151.99110418225  
46.6397391251762 54.0382756991549 67.3976855661302 58.3046521633424  
42.357910063876 66.0786923699684 63.0763092522598 50.1579724208315  
PRG-3 44.1834366106487 127.634504077212 55.4030910454028 43.0001432913058  
41.3331561144087 44.3648993568405 51.0889740983457 46.1081155967151  
46.9094108823995 49.6588896606165 43.9450023643394 46.7577982595088  
PRG2 47.881892094074 44.3529919625344 48.2314980343598 73.6679006272617  
42.9090346219023 49.0361180089431 42.4939802311136 45.1714698794331  
42.4784375889044 43.3465699185405 45.5707650534259 45.3267183347084  
PRG3 41.6354649482853 39.0102066700839 35.2101597814352 45.0798408927912  
36.4434672195785 38.7340969861754 43.4544762830742 39.5466975353131  
41.074824727477 45.4614234442527 42.911855821602 36.7762265039864  
PRH1 43.781101409552 46.4385386401326 46.02045129728 42.6222445667107  
46.9058511192313 47.0940613507321 44.9094465483072 45.642304356051  
45.5238446102876 46.8292269513767 45.1778228816327 49.9419897484381  
PRH2 40.6559419616644 37.920964499903 40.931294690669 36.890925044696  
38.3561682218911 42.4580504587581 40.2154497375715 38.4540849632254  
41.5635499110307 42.5664883002833 40.3452320167286 41.6550823405646  
PRIC285 219.073357087203 615.838713743621 364.337811621248  
436.757445186987 309.39599482851 215.68113524702 325.949742917126  
394.00931573564 170.87055409699 165.992057520727 179.779145453083  
135.92805172353  
PRICKLE1 152.66454549157 63.2804984998739 50.9010149857308  
120.679433440203 54.0126916508417 169.804455288603 59.6780848951767  
54.8412943008635 70.8606919488782 119.86041265821 201.657389063895  
118.49449420132  
PRICKLE2 184.048982286364 72.5397346298724 73.4122412764173  
184.898658656843 114.674541610026 314.36962447353 75.5830548489892  
147.557451530784 55.7522234735038 419.271533050938 299.240215762404  
214.03015073442  
PRICKLE3 46.9939712192224 58.5406981871153 61.0370242377391  
52.3004056941891 48.9627346956003 45.7300501624017 66.6894494536346  
61.5824518349507 64.0541263553251 64.9959712888709 57.5430365699386  
51.4308501933893  
PRICKLE4 704.15545332905 432.669787408904 521.546082699431  
425.026540236907 814.294297312057 466.074595343541 518.300755011657  
365.517719684028 485.698327133705 526.750242877914 539.188951045594  
665.122091380755  
PRIM1 61.5392012551041 105.962195935529 109.029196594263 62.7108230507424  
89.9615463738575 68.6424653037264 166.910579215196 108.788705797019  
135.29225447532 50.5734308316823 53.8499082625091 73.9986015964321  
PRIM2 35.4287975493553 43.5873188565519 39.2707964550441 37.1894304543751  
35.9894133432376 40.4359177791566 38.4005795891396 36.7460922671619  
37.10170285405 38.8507804383261 38.4689132737495 45.0035308952466  
PRIM2A 54.4825201506931 59.5907693818143 54.7855575216687  
51.2973486610884 64.0162246399972 50.4022543872993 62.6885730386156  
55.0698932795613 56.6079099547057 44.6305275729869 47.8988096575648  
53.4735821194294  
PRIMA1 39.2076937845359 44.1533327883807 39.779935291659  
41.8291484190524 38.0089018744739 38.2971553419489 40.2154497375715  
37.4484310268909 42.3138951003676 43.9450023643394 39.5399188536544  
38.7012264805355  
PRKAA1 130.140604559757 136.377736482671 176.363810387584  
101.642226298918 109.545589048507 119.747995520476 174.752830194939

119.670948133232 123.368987753537 171.957278903005 182.976132230487  
186.477689350702  
PRKAA2 46.5549623118323 42.8542642792862 40.6737160001291  
40.0698728584484 41.5668884168669 43.4681646416585 38.941855825269  
39.9576138799997 38.9834959368496 42.5664883002833 39.6403089864678  
44.1452943804044  
PRKAB1 119.362992523422 126.054896053572 133.163926420863  
120.436827608155 86.033725825968 107.309776354951 113.692418102755  
105.965906809429 185.360921731157 185.94424664238 154.811704749343  
228.054565950253  
PRKAB2 82.291097567232 75.5775406974686 102.980622026276  
66.224559122062 78.3542840447759 122.904323796484 41.3594868055879  
89.9227845135785 61.3733228199803 173.891042920642 126.336900591139  
142.012216533823  
PRKACA 39.8662795144616 43.0971787292711 42.1901757067073  
40.8681871019812 41.1868052124344 44.7804080899431 40.5585676679482  
39.0620487644635 41.6340461942423 41.4397539024976 43.0710577955487  
38.0452862258803  
PRKACB 40.3478825593224 47.2770121962655 44.1933547401128  
41.3027031037343 40.9344015136417 47.2927436772465 40.8634043028528  
41.2947540511073 40.276260266651 39.3217258732178 43.3085358214154  
45.9027267631224  
PRKACG 45.9090659324223 50.0425298550559 44.7829632472754  
42.6913548400127 45.4751076037511 45.6129956328415 51.5967098638347  
42.5435283762933 46.9739160257217 45.6868589181768 49.0361180089431  
45.8546719310325  
PRKAG1 150.562062400737 152.72007888133 156.294411442126  
176.816741656659 138.618449365819 188.713487905549 147.945429978177  
202.459251553516 200.318682162912 131.156876010639 139.66584446954  
166.1490536844  
PRKAG2 55.4319891210513 71.193768715137 59.5951618745338  
114.445779948228 79.8511759086625 172.381808887528 61.0468099710416  
65.6684579310715 93.1668080716761 78.2301707073642 107.466490458133  
154.793640473854  
PRKAG3 40.4639532172338 35.5310164682026 44.1452943804044  
40.5484717678957 43.844855336215 48.4758590019384 41.3594868055879  
37.86982638952 41.3803269429468 42.0621425894624 43.3085358214154  
38.1421709520616  
PRKAR1A 259.220844287491 381.093521121589 364.628602969366  
461.394007153992 267.70610731202 544.355979695242 234.45840519702  
206.103296228683 363.324816966828 349.678894821881 318.995164994001  
369.258587948416  
PRKAR1B 53.8856501960117 115.942945263238 89.5597629049747  
43.6726153508978 185.667983376361 59.5979861826984 145.267770598988  
74.383456365584 57.4777075615651 40.3235655331796 49.9338905397767  
50.5511827666954  
PRKAR2A 52.8427643366617 69.392742408248 67.8010199320754  
57.0629653735694 78.6286416672119 69.9819944829311 57.1070449050465  
48.4670130605028 48.8842909466002 40.5090849993014 51.1483696410762  
56.6888826857797  
PRKAR2B 43.5710871617107 46.6996902348633 40.301483914446  
41.0726336841311 46.0043807840705 43.1826328292558 43.6753843488695  
45.4757965005055 45.7452456977857 41.6373771565199 41.8168470823451  
42.1537476443423

PRKCA 91.3967044940546 160.134344197725 87.9871827215149 104.528976428975  
 75.5510570035251 200.483228109704 71.6890300780549 81.8491450876942  
 100.638737800637 238.893145911331 179.779145453083 222.696947669812  
 PRKCABP 105.45765455249 96.981661155293 71.1521292570086  
 59.6153684374766 91.4121563150184 65.2014839770255 127.232160404726  
 73.362936710475 65.7924490713262 85.7732262204681 91.3723635213821  
 72.8306652548968  
 PRKCB1 43.9477262001082 64.3490161044042 77.5718089378881  
 265.026710493466 42.046575509735 124.397048303668 60.7992483126292  
 50.0991178780329 40.0766543123257 95.4533981420022 99.5531381996521  
 106.668282281471  
 PRKCD 152.86270446968 275.222714101589 510.82619253142 461.607803139448  
 261.6201598868 158.884110481815 343.016541928592 188.196662406725  
 488.908231529696 402.49165235168 460.162024551004 325.172633427119  
 PRKCDBP 386.372142079981 190.214361156876 220.938982373755  
 571.170643523692 160.203825526096 1664.00821059181 72.1401612718245  
 142.846665249354 128.749209040345 602.047768767953 649.487838020327  
 296.463473585355  
 PRKCE 54.0170817319522 53.565717255469 83.8679756709676 65.8926843080114  
 65.3019328668633 63.6894484284172 61.2183034191703 88.5511408870489  
 62.370559099758 55.7930787690756 67.495246759946 61.5300817099814  
 PRKCG 46.6348258763289 38.8336427948187 47.2962360458401 37.7469621225553  
 41.5668884168669 39.8455060654531 42.357910063876 42.2577689927563  
 42.0621425894624 42.5664883002833 41.6336636285875 46.8129509799753  
 PRKCH 181.064239330482 283.88971280023 342.146013966482 359.889643461047  
 163.809567262808 152.86270446968 205.086228002776 261.756974562481  
 306.14500148663 303.93332785291 313.660064080622 342.643344197936  
 PRKCI 59.220967994972 41.159706131351 55.9459886217809 48.1662933382789  
 58.4383854340181 43.7630587657205 49.3854238365325 52.7787010032051  
 61.1560835966725 62.1035858593388 57.2979215534929 68.2309359831273  
 PRKQC 118.186590679218 160.134344197725 218.675464231277 271.436000380202  
 134.394743648475 147.704325041249 152.17335005192 99.8277095030346  
 300.845404774478 101.463033319045 97.8825824657468 186.372887375058  
 PRKCSH 153.992331037033 184.105396912056 222.728316525835  
 143.478533731355 212.688298502868 154.355197155161 198.497745548245  
 221.598637828404 204.774090707986 212.530138323284 206.103296228683  
 176.318618244066  
 PRK CZ 85.5797236700758 96.3120603627576 106.582060920252 57.3797835448761  
 109.758297200083 51.2423106372758 110.757899996422 132.838429478396  
 128.616776019243 104.480361196422 101.516595046503 66.8684224881475  
 PRKD1 85.3718124658316 93.5045354990096 80.0183739952818 54.6089451252049  
 37.3508690072156 104.80882886573 51.4349390827895 58.676230030835  
 56.0496524902806 100.638737800637 93.5982028088194 89.3868257841517  
 PRKD2 72.8120269375546 91.4581948567397 98.7215951303498 85.9799968870368  
 89.3168921945222 62.1857038870283 69.8505620106065 85.0308877626746  
 80.3500323413132 76.1969626204894 80.6674009289482 60.2165699959135  
 PRKD3 42.3433931248155 42.7775752471711 42.157627240486 38.8495095797881  
 32.9756367838345 39.6251842352088 37.830876898596 39.9576138799997  
 42.0621425894624 41.4397539024976 42.357910063876 43.2776458914333  
 PRKDC 72.983338488605 111.748894485737 92.804679821289 114.520410790135  
 161.500218853268 75.5561597374812 116.17887995398 107.055174400714  
 182.551901102169 81.2992152187529 91.4121563150184 87.248511264058

|         |                  |                  |                   |                  |
|---------|------------------|------------------|-------------------|------------------|
| PRKG1   | 36.6062356000449 | 40.5400384479766 | 38.5045333213784  | 42.1622837416589 |
|         | 37.8242236505241 | 43.3269087731399 | 41.0381860307445  | 42.6913548400127 |
|         | 37.1820543575123 | 37.3687900733549 | 40.5824352835642  | 42.7275315121163 |
| PRKG2   | 42.0532901689036 | 33.1817617228171 | 43.5710871617107  | 46.0228732507872 |
|         | 40.5710637884029 | 36.4986986135769 | 46.5650556481721  | 43.5544347011646 |
|         | 46.4861258030402 | 44.4652605017595 | 43.1931731665131  | 45.9693232070002 |
| PRKRA   | 230.554867472663 | 213.140641182603 | 207.18510695093   | 184.898658656843 |
|         | 242.236207196941 | 263.096895937991 | 233.501069644324  | 222.202580186782 |
|         | 218.675464231277 | 198.922575188741 | 162.143245260314  | 212.803471204964 |
| PRKRIP1 | 182.685579297058 | 112.436153468759 | 146.087016079575  |                  |
|         | 120.068630086702 | 215.175765091556 | 115.441414762268  | 102.00080367858  |
|         | 178.624349589089 | 179.994715581707 | 186.522518256229  | 183.086707591185 |
|         | 127.093495914275 |                  |                   |                  |
| PRKRIR  | 439.558287621096 | 415.364456363434 | 307.445116836976  |                  |
|         | 426.276230164353 | 599.670771796585 | 516.076634990003  | 505.018127833201 |
|         | 507.307494640785 | 412.421643885499 | 419.993482471924  | 392.008276951929 |
|         | 423.608694638779 |                  |                   |                  |
| PRKX    | 101.935321521672 | 89.2444752405108 | 73.7133884699889  | 80.1809075683154 |
|         | 69.8505620106065 | 56.9320717885002 | 122.514153407264  | 98.5663841503803 |
|         | 94.8408264309872 | 77.268323196327  | 74.2283328056604  | 63.810395129507  |
| PRKY    | 156.844010597219 | 56.1355483199198 | 36.769073068743   | 42.4580504587581 |
|         | 47.6884372645373 | 42.9695585740813 | 51.7714254834195  | 52.6960621424156 |
|         | 47.3791873993182 | 56.4553747079294 | 61.6702707724448  | 54.0374522273907 |
| PRL     | 40.7609952437622 | 39.9697332660833 | 39.9101908547397  | 39.2780515621926 |
|         | 38.9496515344837 | 45.4882438975269 | 42.8684958525042  | 44.0390019242862 |
|         | 39.5806465938526 | 43.7303813515864 | 41.9083581529276  | 39.4490233720848 |
| PRLH    | 44.0328992213727 | 45.4882438975269 | 44.5134109184888  | 40.0698728584484 |
|         | 38.6454098044474 | 40.1428591998404 | 50.3519150282938  | 42.2577689927563 |
|         | 41.1742244762318 | 44.1379638573455 | 37.92304440150891 | 40.3691324547049 |
| PRLHR   | 40.6559419616644 | 37.8217989841918 | 38.7745734037492  | 41.3027031037343 |
|         | 39.9697332660833 | 38.9378717994178 | 39.8695929627783  | 41.0381860307445 |
|         | 33.6902293666089 | 34.8137085420423 | 36.2435874904689  | 39.0536056496869 |
| PRLR    | 45.7356815244513 | 41.159706131351  | 37.634370327756   | 46.0228732507872 |
|         | 40.3021896270845 | 46.3203995372658 | 45.4164642922183  | 103.945335792682 |
|         | 38.8495095797881 | 40.2493681589104 | 40.7725311293918  | 39.2469742642337 |
| PRM1    | 36.9060997041453 | 34.3715326040967 | 45.063792968927   | 42.5664883002833 |
|         | 39.7568367479301 | 33.1602385985469 | 38.1793598983615  | 44.293922970134  |
|         | 36.6312676076142 | 39.4710743516517 | 45.8180710486329  | 40.0557788909923 |
| PRM2    | 37.4554876386402 | 34.7135536792489 | 38.3166554965434  | 33.6816578730693 |
|         | 33.6330903323612 | 34.3887641786747 | 37.830876898596   | 40.1474543172332 |
|         | 33.6902293666089 | 30.0771630269067 | 35.6970528713709  | 33.1559412791294 |
| PRM3    | 40.0270326792985 | 38.6807508413673 | 39.4304889666789  | 43.26160898693   |
|         | 40.4639532172338 | 39.972557283863  | 42.7431359850339  | 44.293922970134  |
|         | 41.9635525160083 | 40.4488698263442 | 39.5399188536544  | 37.7526485343328 |
| PRMT1   | 321.550107822925 | 796.359355922952 | 614.088027946471  | 270.78959225422  |
|         | 1345.37091574015 | 632.019639546131 | 707.4124863603    | 439.106576928682 |
|         | 835.171475474151 | 346.438778257772 | 439.770250139925  | 397.520960156896 |
| PRMT2   | 131.277614500948 | 140.199798713912 | 242.282363793567  | 145.14768503072  |
|         | 126.564008534823 | 362.724027984972 | 154.287396750021  | 136.806769571262 |
|         | 209.87862540213  | 203.586637054746 | 189.164097331837  | 188.552900887757 |
| PRMT3   | 120.20612443357  | 327.912730756303 | 324.582288788326  | 146.719419166639 |
|         | 404.86512250958  | 178.904972763325 | 211.669885749793  | 184.162452344446 |
|         | 206.031918669687 | 162.908986027874 | 169.479834662751  | 194.862177434028 |

PRMT5 180.222765336208 151.472676874224 173.992867985744 137.335224748204  
230.633139180542 177.088290547513 151.795609904857 142.1823033942  
156.65747550889 148.887819162926 139.071851755156 170.644636226884  
PRMT6 94.4618437533343 119.004636734744 113.735641101347 68.75304552302  
114.161435210562 88.3872602658912 107.466490458133 109.836517462126  
123.321810678947 80.1419822448876 94.9001252449925 99.8754776648876  
PRMT7 73.9192243586276 69.8983723094667 80.6674009289482 48.1662933382789  
55.0031529299037 69.1523164481201 92.8579489575841 87.069143362676  
74.9179396623258 58.7198210787055 73.7060605978536 67.6138276415458  
PRMT8 47.3791873993182 34.8137085420423 37.9482157381008 32.4383992781552  
36.5393857306744 41.159706131351 41.253645578517 39.853866204927  
42.0621425894624 40.5090849993014 45.390192977585 43.0930293831497  
PRND 36.5393857306744 47.6914221838216 43.0971787292711 46.1673159982664  
35.4484652445078 45.3882138838137 48.3411413510851 45.4757965005055  
37.3600014814388 43.401782064778 38.745552403895 39.9519547348106  
PRNP 531.69595054137 409.312313055794 711.08269990525 1001.99175009124  
1726.90584784425 1810.67209360676 327.729165976539 525.687522832693  
637.035929429013 1325.2479053325 1152.55315876935 1327.93833415582  
PRNPIP 75.2053836356882 64.3824529624475 66.5694839794116  
53.3967242431461 87.9638809147835 58.5150230852505 89.6056978251991  
93.3418050966934 89.2913927776683 61.8529316708431 65.1757400078647  
60.0372015630618  
PRNT 37.1485601150873 37.6383530120621 39.4710743516517 41.0726336841311  
40.4639532172338 37.0180934800573 39.2533668167483 41.7419877611072  
42.1594905198929 40.4136535208406 36.43924066428 44.2527566343661  
PRO0132 41.4508241771315 41.8073910693411 37.7384958256497  
42.357910063876 37.2567512265363 39.9397419279057 38.4005795891396  
40.4359177791566 40.3316153483289 44.1379638573455 35.9563099719284  
43.8575940017119  
PRO0611 42.5193208629123 36.0366673493555 42.7303139017786  
36.6501141438378 37.6527901109005 39.0266821712099 39.6535880152834  
45.8669209716694 43.7630587657205 40.7063426028871 38.2795150354677  
41.5536168238478  
PRO0628 79.5531316151328 92.0880591999243 141.577762652792  
207.380865650247 69.7413896580273 85.1544284060549 77.0003455479124  
119.301672388541 52.1788489555942 78.839411865787 168.11088055793  
103.64431747876  
PRO1768 42.6036491382658 45.6533175604486 39.5450079747895  
43.4410741327254 37.6527901109005 41.554942319225 37.0564573649223  
44.9977782988116 52.5772854102326 41.0057887014368 40.9157352260901  
38.6454098044474  
PRO1853 89.0495215957248 60.808065997635 61.356483470053  
96.9476136220382 52.4370718282084 55.9351706773613 74.5591290353333  
132.931052537195 58.9056300364078 113.759627906335 122.052907748249  
78.8968326770219  
PROC 49.2595762436995 46.6996902348633 70.0955779023465 45.8844325913247  
38.2496050953547 39.9397419279057 41.8315602975157 49.2019743609873  
45.7452456977857 57.7805922926828 47.8284278211109 43.5738557773903  
PROCA1 44.436995101921 46.4861258030402 37.8386378737561  
45.7397504535169 42.3685136297603 47.0027453663546 38.6243997507646  
40.6171774724171 42.357910063876 36.0481934423077 36.5359455830388  
37.6557714476853

|           |                  |                  |                  |                  |
|-----------|------------------|------------------|------------------|------------------|
| PROCR     | 66.2154717217675 | 197.841210387578 | 66.603126065489  | 154.019005732316 |
|           | 49.32293280121   | 119.474339360208 | 49.8281348927244 | 63.8008894786105 |
|           | 77.9028721785469 | 92.261357059727  | 96.3495443565738 | 88.5638310461364 |
| PRODH     | 51.0225132036905 | 50.3586212130973 | 48.8100349749783 | 40.0698728584484 |
|           | 47.3172462673426 | 57.0775902639215 | 38.0598374201407 | 68.6704961638492 |
|           | 42.2577689927563 | 84.7642634532073 | 52.902043370862  | 53.3904307221902 |
| PRODH2    | 40.6559419616644 | 37.8217989841918 | 38.7745734037492 |                  |
|           | 39.7411455670172 | 39.5595233162192 | 33.5578650644246 | 37.2892641289258 |
|           | 35.1738399826814 | 41.5635499110307 | 35.8304004211528 | 42.7275315121163 |
|           | 41.0657892043496 |                  |                  |                  |
| PROK1     | 36.7356360093603 | 38.8336427948187 | 45.2313723727673 | 42.6913548400127 |
|           | 37.2567512265363 | 41.2567470068038 | 46.4388841354122 | 44.8997235283254 |
|           | 37.4540772310118 | 45.1569741609597 | 44.2142581488029 | 37.2810767789306 |
| PROK2     | 53.4921736109774 | 65.3694267397114 | 76.2533853403813 | 1174.92419086759 |
|           | 56.5933259268408 | 125.364451149941 | 656.355333007615 | 43.9366081640576 |
|           | 38.4344387289956 | 40.4136535208406 | 36.5359455830388 | 40.1700117452801 |
| PROKR1    | 39.0620487644635 | 40.6380495994768 | 36.4564050256915 |                  |
|           | 40.1804147506786 | 37.3508690072156 | 42.8598805316863 | 38.4005795891396 |
|           | 43.844855336215  | 37.0126425326534 | 43.1839109702714 | 38.8507804383261 |
|           | 38.6454098044474 |                  |                  |                  |
| PROKR2    | 38.1169703906207 | 36.2103905554984 | 45.3974838013476 |                  |
|           | 38.6414316877471 | 43.4544762830742 | 42.0574848021044 | 39.8695929627783 |
|           | 43.0390857698452 | 38.0213051227859 | 48.7414853386615 | 41.9908237694988 |
|           | 42.57175366709   |                  |                  |                  |
| PROL1     | 40.2543341073001 | 35.8227939208521 | 35.8265993915844 | 35.49696651597   |
|           | 35.9058393060637 | 34.9849896310235 | 37.7136011474903 | 35.6825474397235 |
|           | 36.6312676076142 | 38.2069499294002 | 32.1218888714537 | 38.2350720635382 |
| PROM1     | 59.3923286524971 | 64.0096843640535 | 44.5134109184888 | 46.8954576545929 |
|           | 94.3450965454031 | 150.405742308999 | 48.6395795163502 | 207.342732103088 |
|           | 45.0997987980157 | 153.42135363926  | 169.561107057293 | 68.9258122619781 |
| PROM2     | 280.920208331594 | 1142.67599037881 | 1490.1549980903  | 61.7502624458447 |
|           | 126.79509061532  | 60.5803031036931 | 145.405415337402 | 702.737741114234 |
|           | 760.745188431719 | 1570.45778081591 | 1266.41536472956 | 1559.50766982801 |
| PROP1     | 36.0144420013819 | 42.1607322031054 | 39.991353369336  | 38.6414316877471 |
|           | 38.4540849632254 | 36.1190722948669 | 38.1793598983615 | 38.6454098044474 |
|           | 41.1742244762318 | 35.93950183586   | 37.3687900733549 | 40.4639532172338 |
| PROS1     | 225.300736968225 | 105.118498939628 | 95.9811314739351 | 258.973633899103 |
|           | 187.315844580254 | 521.546082699431 | 98.2843999216669 | 169.790843803064 |
|           | 51.0062122023297 | 287.786165030406 | 218.313812956524 | 211.064699765122 |
| ProSAPiP1 | 51.1740855632044 | 74.2653431904071 | 71.2246788429078 |                  |
|           | 42.5664883002833 | 168.11088055793  | 64.7905331739366 | 69.1414574152997 |
|           | 62.8885806455128 | 50.6750785584772 | 75.0665411373616 | 67.0361353184222 |
|           | 63.7744603935682 |                  |                  |                  |
| PROSC     | 264.975481501401 | 359.296873000994 | 327.193250073326 | 369.717462266442 |
|           | 290.884313999173 | 415.15150032168  | 257.711912004    | 258.30549459038  |
|           | 247.007210336963 | 258.757703729905 | 289.780414673585 | 449.427251674566 |
| PROX1     | 38.0089018744739 | 36.0366673493555 | 38.6727842796202 | 44.265834798964  |
|           | 41.1868052124344 | 49.7458652239071 | 36.197424053556  | 38.2782436497441 |
|           | 39.1790517315259 | 52.3304586399695 | 51.4413099192899 | 42.1537476443423 |
| PROZ      | 34.9138625012006 | 39.6123051184545 | 37.3687900733549 | 38.5252456306656 |
|           | 42.6022652963326 | 42.6575535390785 | 39.1539892144371 | 40.3357777530419 |
|           | 39.1790517315259 | 38.6454098044474 | 37.7384958256497 | 40.2669497398702 |
| PRPF18    | 67.0163226819964 | 68.9833517108866 | 64.0162246399972 |                  |
|           | 68.9937449813561 | 64.3571664944642 | 86.7776945455037 | 83.374777060444  |



89.0275988550016 88.5564369981649 64.1097859982912 75.3969721155153  
73.408861359425  
PRPF19 206.963315276491 186.600931545083 168.073605090354  
178.858202962948 310.120875196999 188.386331007465 386.506267846839  
486.487366153374 249.995119246929 287.786165030406 292.93036571522  
187.16833117416  
PRPF3 232.147792636393 187.580695643466 185.109323245018 153.711194034581  
211.485592971588 161.04166688561 181.2179249806 197.776069056927  
143.761359357965 235.33716196909 269.857104259782 229.837344196558  
PRPF31 300.560071753181 281.262083731954 405.496884468464  
343.892794667047 775.931494648677 484.810017115699 441.872082665398  
490.876152145712 462.762837284748 372.982648892131 477.924466983414  
323.906340044066  
PRPF38A 71.7408778060956 67.1477341610979 61.4121672148248  
73.4788569136441 69.5741225986433 75.7502062965698 77.9028721785469  
76.1493261430901 77.8490019489375 72.5918913856713 67.7280831060202  
75.9802606133139  
PRPF38B 60.2547250212462 65.2001674269291 65.49167373382  
79.1000897258245 57.5685357492202 56.3525213736952 53.8687221233237  
57.5640428227111 57.9713749600418 55.4037482627222 63.9029785089421  
73.9192243586276  
PRPF39 45.4799270968969 43.5182502375207 45.6989664108554  
39.5050383901884 44.5668141895992 44.9896851005259 46.4388841354122  
49.6203214143464 44.5303781239209 46.2286164776607 40.8225507267584  
41.2437378488025  
PRPF4 344.985739524681 470.231929311877 227.817928402227 329.677454924062  
502.32041794318 348.913213159222 447.348799009312 276.321098534247  
284.351747562807 334.093449847539 307.264133974364 301.457545514208  
PRPF40A 72.0334593545916 102.053879707074 93.6591201235745  
124.803597244786 69.805066579191 86.9543262608386 81.909815795953  
125.137803364368 60.2276476399612 58.2818491355907 63.1291723738553  
63.6966761077037  
PRPF40B 43.4626049853157 46.1797803908218 45.8844325913247  
39.5050383901884 42.1386542162789 47.3375061488583 50.6069579386898  
46.0106098064475 57.7865070833351 53.4735821194294 52.0583273941813  
50.6141827957642  
PRPF4B 74.5694657001572 60.0835531094681 63.8399092891728  
49.4641002049227 85.0342118119783 54.5125550937898 46.7100796279384  
45.1226428168214 79.3539393480885 60.7495043977707 58.0139597055449  
57.2350830635912  
PRPF6 52.109723558511 64.6970918899831 58.2251348002272 43.4410741327254  
73.0433648756396 89.2185019250322 62.9165938167938 49.3880946790306  
73.6097614332043 41.6373771565199 56.4567728276775 62.0967404944031  
PRPF8 346.285308869994 566.548446430954 429.576301511638 282.90107781812  
376.931257615162 559.559234461244 578.15246893623 273.645674189546  
389.994289973076 356.565801074289 505.018127833201 403.335980469043  
PRPH 43.9309845324767 47.2055133646385 42.9104454767916 41.6564075217517  
44.6834648302383 53.2046867327331 44.8643898647322 48.1591264215184  
44.7058233759912 60.6266092582071 54.2999306485758 48.27609330316  
PRPH2 49.9419897484381 36.89524015739 50.1860191642359 52.6947911480086  
40.9950639693255 47.6803619768589 51.5967098638347 48.6441988290952  
40.8970401536578 48.0211752672327 49.319499137678 43.1805016690297

PRPS1 268.745928429069 196.735144093998 275.096637886925 221.354588127022  
352.997455210484 282.445037659981 226.323448467365 215.869541768982  
349.767857026458 158.308338986864 193.395549316561 230.787791652978  
PRPS1L1 46.9939712192224 41.159706131351 38.741573807882  
40.9607305725196 42.7489468897708 40.1428591998404 45.4799270968969  
40.7311497914871 42.9020321355927 42.2614524730856 45.2265319826548  
43.1235886043549  
PRPS2 97.3188285021124 117.239774193934 114.533239859288 108.486774731927  
102.913039837094 171.176393131741 188.943404504867 141.994123068328  
148.016994658777 94.5055588176321 92.6736029146947 157.356512456687  
PRPSAP1 429.329962597147 351.700618429121 504.676944739425  
248.058310353348 441.872082665398 315.276749671783 479.696469083953  
482.238595345574 593.801086643125 475.881757842864 322.678762360476  
384.919835924792  
PRPSAP2 67.8208976798364 142.221867895111 116.295564219236  
83.877343750194 134.258351436533 107.808744445896 118.143444770806  
89.8192713348784 99.3797043236938 96.4509532728415 103.75895351937  
119.700522283289  
PRR10 39.8662795144616 35.9305494063137 39.1799070031819 35.2143190355414  
36.2048942610546 40.3357777530419 39.3585350448719 41.1575777497576  
39.7537274655115 41.7405682794166 46.0905079010237 39.2469742642337  
PRR11 48.2910530887214 86.6854406823303 72.5835488194631 63.1604223919703  
130.758455807465 39.8455060654531 125.512567429299 79.3614922672599  
68.1674425673171 41.3321861371202 42.911855821602 44.3521099857368  
PRR12 45.1912496459517 46.0713306971594 47.0055981216687 53.593974682612  
50.0580547772867 43.0860383229288 45.3597029614942 52.1788489555942  
50.7619345314571 47.3791873993182 46.0095710163378 47.1060577218993  
PRR13 1817.14004766564 1117.26060212107 1031.4414268329 1529.52516575545  
917.179747195874 726.42773300581 1118.62223628039 2225.65559724391  
1359.9708539999 1067.08316477623 1064.35745220225 1173.47285626656  
PRR14 244.872078761743 327.238337722366 401.347734852083 268.047342640491  
691.132727131746 260.910912798295 240.265816943765 390.489537450621  
220.514070515085 270.756849919679 269.546586017659 249.584588371496  
PRR15 37.5887129572848 37.8685585043426 41.2365089689635 48.055683217958  
40.3021896270845 41.3553369544097 46.1634822993009 41.6916508480321  
49.9951674107458 41.9666541498638 44.1148826235374 43.3262148375525  
PRR16 89.7554896946341 65.7457567201236 75.2977438265751 101.008449241109  
102.49785018292 79.4053001255904 68.1125016199524 73.5950442915143  
61.6839343510302 88.2056147099779 85.2598847559951 66.6118713143653  
PRR17 44.3355304829989 44.4411734611229 38.6727842796202 36.890925044696  
44.0451487108213 40.3357777530419 35.9058393060637 42.157627240486  
43.9450023643394 36.8059561571675 39.3667161654772 42.9887069977696  
PRR18 42.2455707947223 45.4143854024453 51.4308501933893 48.9944486068347  
35.9058393060637 41.3553369544097 45.7452456977857 41.9315419791594  
39.5806465938526 43.9450023643394 42.2618615571566 43.5738557773903  
PRR19 58.2902084992082 49.1283590719461 44.7829632472754 43.3078542962968  
55.0031529299037 42.5660695551615 62.0404348860702 47.8947595316832  
54.2825877218965 38.0078357808393 43.0971787292711 47.3172462673426  
PRR3 49.7350276169552 46.4385386401326 42.7303139017786 39.1335009052403  
46.1513019317765 44.4619248757502 49.9085372049438 41.1575777497576  
47.3213303943727 50.1185085888209 47.9942520395434 51.5900962783802  
PRR4 50.2203578628217 56.7826399116207 41.6977706798234 44.265834798964  
45.1137938810047 49.2050538150106 42.8684958525042 48.6441988290952  
54.2825877218965 47.9056710878325 50.8826620053386 45.3763275588341

PRR5 121.37214545992 100.865270615385 92.9894133685392 86.500678864429  
158.364437886751 108.654797121478 78.3082773071531 89.2751674264718  
86.9274372004388 87.6960277122561 95.2218627805387 67.6767845246581  
PRR6 170.593589984253 225.120999402048 192.264432082651 106.582060920252  
411.254448823371 178.688550924272 534.755211286733 121.050369804136  
263.387877739079 192.564048264712 163.476051754305 248.414210905199  
PRR7 84.2728210732532 58.5406981871153 50.9010149857308 73.3725472767369  
168.247603128156 54.4753345912615 82.7853677822046 85.0308877626746  
99.3797043236938 42.6793753550854 51.6414075056938 45.7562276914441  
PRR8 42.1537476443423 47.087835967892 41.9666541498638 57.0629653735694  
42.6022652963326 40.244271403831 42.0605906240248 48.6441988290952  
44.619512785899 42.9866214102525 50.7903824729818 41.9430737035925  
PRRC1 228.747320301945 176.07173250529 167.014274808063 159.440571032045  
132.555169949054 131.319040057576 127.588471566929 150.723391206253  
203.586637054746 135.973016473297 153.258204588589 131.717764850211  
PRRG1 197.776069056927 74.0039764902057 88.7928773498158 75.7666827480067  
76.209239524646 104.059057437473 112.805898501551 152.456314990408  
100.389686642657 95.7125018118399 109.503117647487 91.40570426491  
PRRG2 138.26207427245 216.63059645927 322.169157552725 50.378948785456  
343.990395610093 78.1952428431942 260.766438659762 181.298709635609  
441.976123154763 242.190059393491 241.952522667413 152.159270481787  
PRRG3 42.1537476443423 35.4484652445078 43.7630587657205 50.8567345921473  
39.3667161654772 41.2567470068038 39.8695929627783 43.2551508830106  
46.3203995372658 44.4652605017595 40.1742127891824 35.9604262434141  
PRRG4 58.4920021605316 95.3222932230888 107.161099000408 68.6379135603075  
66.6894494536346 55.0618818132967 85.7299543466172 85.2000385588819  
124.064628168507 143.383133346874 151.472676874224 114.236625083989  
PRRT1 48.1125722136997 50.4872122867759 50.8303921211581 42.6913548400127  
51.6869155634183 55.0009147092272 50.0088611244948 48.9826868640753  
59.0563795877672 56.5379973844443 53.6895401581575 54.720204938924  
PRRT2 61.7551416187554 59.6359245937831 52.5353664902258 50.7046706880325  
46.0977687311222 73.1169003714219 55.9276266345493 58.3046521633424  
39.5806465938526 88.9738853594498 104.986694941968 60.3816817102326  
PRRT3 59.8248482438562 57.0082102559228 64.7318794662958 50.378948785456  
78.0077300979911 55.0009147092272 83.6935756500468 83.5767232665142  
60.4837400912239 57.6791750431251 68.0960719007162 48.5123041297835  
PRRX1 325.676668250281 55.8678615468603 50.8303921211581 229.379918828848  
41.6806984441849 222.05036990665 40.2601451506332 59.9682734755814  
46.4569566520107 101.877183008944 61.5515639412892 79.7238173467616  
PRRX2 163.62024333166 64.6970918899831 48.9944486068347 75.2475238554276  
58.2780916793348 143.265312025262 37.2892641289258 96.213791081731  
35.3227485563945 78.9420136903401 84.1112814779578 109.594402843796  
PRSS1 38.5007204246293 47.4740726032707 39.7411455670172 37.29566077996  
42.3685136297603 38.9378717994178 41.706879587091 39.6474008369935  
46.7760357462635 37.3179578037963 43.7585538437696 44.7401523707775  
PRSS12 41.2424637338424 46.9919960628953 43.5710871617107  
39.3750969348308 49.9493230064613 39.6251842352088 37.4772922422734  
43.5544347011646 52.7512110769042 43.6033221838149 47.5439485437351  
46.3411353377615  
PRSS16 55.7246872330059 89.4747568145717 88.6771566133367  
45.1944222548351 44.3557408297309 39.2248354955045 215.109108265052  
73.6855877240541 52.1788489555942 45.7911932481722 55.3147456054175  
58.6481644777552

PRSS2 45.5758521267508 46.0713306971594 34.9849896310235 40.3180310664156  
37.6527901109005 40.9506062495231 41.1507980856436 38.3684202018524  
44.8003345643334 42.1622837416589 37.9230440150891 37.6557714476853  
PRSS21 40.8681871019812 40.148780650831 39.9519547348106  
41.6564075217517 43.4885245598939 40.1930209223556 42.22763273471  
39.9576138799997 90.8920620927752 38.2550371518309 42.8263096141654  
40.9683275553869  
PRSS22 92.7427427543974 53.812632592983 55.9459886217809  
37.8442841690502 40.7779767565889 42.157627240486 58.7585623394335  
64.964255000378 80.4554147910354 48.3693338695392 54.9765783642973  
54.7953298048942  
PRSS23 196.034087004464 111.248876636045 201.163076338483  
161.092366817598 90.0942781313264 362.506098778318 69.1414574152997  
116.374125502825 83.3710785008781 576.367042159347 258.913621521866  
306.115856873599  
PRSS27 68.2614370871382 72.6888636455541 52.3432130135266  
52.3004056941891 49.32293280121 47.8636003588181 112.113501370522  
96.8240908274121 81.7566533443175 50.4234835272833 57.4078217542368  
46.3411353377615  
PRSS3 75.0704619826557 55.4106986624448 46.5650556481721 46.0228732507872  
48.5000946421718 34.3887641786747 206.989423961124 52.5098795466615  
118.696127260286 55.7930787690756 77.2834482217973 71.9369353731849  
PRSS33 38.5007204246293 43.2649781354792 38.6727842796202  
42.2496337895968 35.6434124419782 40.3357777530419 43.1931731665131  
35.6825474397235 38.8271346375425 39.8873706855774 41.6336636285875  
36.3454320848591  
PRSS35 46.8141313516997 48.8584917918986 42.157627240486  
42.1273928203021 46.4343327861696 54.2503023961401 48.0283573444179  
46.8954576545929 41.863927676552 51.6778366958973 50.0303076717704  
45.6692241948108  
PRSS7 56.6951078698291 47.8947595316832 57.0775902639215 61.3747706295648  
48.0234896130991 48.1210452368919 62.6885730386156 45.3872406432794  
49.641159251878 47.7800121097582 47.0540401406168 54.3418785197547  
PRSS8 904.487756674518 113.351710503778 144.412165495719 43.5627649099623  
192.171116215791 51.702461863489 209.467874193952 429.983084929605  
112.414189401193 68.6095266659765 95.6731932757489 87.1109435144663  
PRSSL1 35.1307934330047 34.3715326040967 39.0775870687758  
37.7469621225553 47.4548471240051 42.357910063876 37.0564573649223  
41.2551966132486 37.4540772310118 42.6793753550854 40.0766543123257  
40.6614700944853  
PRTFDC1 47.8249696958403 44.7829632472754 38.5045333213784  
38.3166554965434 55.0031529299037 71.8466937395628 73.0433648756396  
44.5029690493211 54.4059109100338 47.9056710878325 50.4740079109854  
45.4799270968969  
PRTG 39.0102066700839 39.1494041371387 40.0998167098057 38.3626655809423  
40.7779767565889 39.9871741554388 42.357910063876 39.9927637255545  
40.3704050658025 39.4710743516517 41.2598458726002 40.3330033416496  
PRTN3 48.5835484742456 40.9731067463382 44.696023817801 45.5869891570251  
43.004943518025 39.2248354955045 43.1931731665131 45.7476095696859  
46.4164127487052 41.1222709786153 44.0409178714232 41.2437378488025  
PRUNE 135.829530518199 91.0327980861321 142.614006543733 80.5537984388921  
137.309523231049 115.143810463938 122.877322487518 230.649032296928  
122.0305509548 159.618353114269 143.122201568705 133.911556922212

|        |                  |                  |                  |                  |
|--------|------------------|------------------|------------------|------------------|
| PRUNE2 | 42.1679276329916 | 39.6123051184545 | 43.8495248991589 |                  |
|        | 44.7980740332174 | 40.3452320167286 | 92.526038865874  | 42.629412460409  |
|        | 41.0844534776541 | 38.1658452457336 | 73.9061211499986 | 63.8294437579951 |
|        | 76.198032870201  |                  |                  |                  |
| PRX    | 41.2836317141451 | 43.7466029219113 | 38.6727842796202 | 41.253645578517  |
|        | 39.859345745831  | 49.3602677871628 | 38.6522126621364 | 43.2855454938964 |
|        | 43.3744503319109 | 45.3530683538086 | 42.7275315121163 | 44.5432192783161 |
| PRY    | 41.1523487516364 | 39.0894172982439 | 39.6451483836089 | 38.2041059863839 |
|        | 46.7508829977587 | 40.040778349137  | 35.9058393060637 | 39.9576138799997 |
|        | 38.9834959368496 | 40.1179210534118 | 39.7342718293432 | 38.2350720635382 |
| PRY2   | 39.7576136507593 | 43.0227387991135 | 46.5650556481721 | 46.614092935749  |
|        | 39.6535880152834 | 40.040778349137  | 48.8319884367456 | 45.2806199505029 |
|        | 42.4540072551568 | 46.2286164776607 | 46.0905079010237 | 42.1537476443423 |
| PSAP   | 4259.50675863393 | 3124.84336032646 | 3707.73750609316 | 5811.22276358172 |
|        | 2323.81110653289 | 3114.05035137552 | 3043.12489526581 | 3329.68037676265 |
|        | 6186.45345364665 | 3190.0108307463  | 3707.73750609316 | 2771.14077845128 |
| PSAT1  | 79.3889841821749 | 119.846620703059 | 82.1062834830477 | 90.5216273844682 |
|        | 207.741669973713 | 61.7566103867825 | 233.501069644324 | 104.480361196422 |
|        | 177.688415930665 | 146.634440537624 | 116.304054038726 | 94.9001252449925 |
| PSCA   | 67.4846787600629 | 328.721532812392 | 3088.44063817936 | 86.0630164348952 |
|        | 858.228943026906 | 219.878589678991 | 64.3669451425581 | 215.109108265052 |
|        | 885.224377292125 | 1956.75875151802 | 3421.24021192326 | 798.996494242432 |
| PSCD1  | 467.645011859047 | 640.78586776574  | 724.881002237334 | 1259.2978319548  |
|        | 365.459728613746 | 500.313640131475 | 557.717744882602 | 507.307494640785 |
|        | 380.098235864256 | 392.51606894011  | 507.239294307089 | 322.371597171026 |
| PSCD2  | 79.2665546280232 | 73.2842501003097 | 81.8242150474253 | 53.4785152499923 |
|        | 64.6835308827804 | 73.7400293044315 | 78.5375244257332 | 80.191847692094  |
|        | 90.1430468048409 | 73.1407519625966 | 67.1477341610979 | 65.4784797364469 |
| PSCD4  | 153.827399203384 | 175.550329937952 | 124.338989399317 | 852.291461317697 |
|        | 57.2960245538881 | 315.696895080135 | 160.264217082275 | 69.4677195088043 |
|        | 52.1186591838715 | 93.3897477314201 | 77.3999378505514 | 61.7502624458447 |
| PSCDBP | 44.0707087774725 | 44.5884811528117 | 45.7968648044613 |                  |
|        | 196.355909140782 | 37.1935273352159 | 43.8582747295766 | 46.9929836306816 |
|        | 43.1931731665131 | 41.5635499110307 | 38.9207612933107 | 37.6484782516569 |
|        | 44.4475838947656 |                  |                  |                  |
| PSD    | 40.4639532172338 | 43.683792219729  | 41.1367478979484 | 44.4367387274922 |
|        | 47.4548471240051 | 151.088035451997 | 38.941855825269  | 37.9837233601316 |
|        | 40.137818555383  | 88.9738853594498 | 97.9497090233081 | 59.3709786862962 |
| PSD2   | 37.7384958256497 | 49.6203214143464 | 44.2405728317107 | 44.265834798964  |
|        | 44.147557390293  | 39.2985791324641 | 54.8074655158941 | 114.84900130932  |
|        | 38.7298222155532 | 38.745552403895  | 40.9157352260901 | 42.4607795638552 |
| PSD3   | 52.9609836781499 | 61.1745030100746 | 78.0133696753253 | 60.7148442408147 |
|        | 56.1733549054832 | 57.0775902639215 | 55.2998422481855 | 51.7121586468362 |
|        | 55.5751438859404 | 64.5845827915699 | 64.898351831341  | 62.7924038489274 |
| PSD4   | 97.2535496140648 | 164.941191767024 | 127.352997770688 | 135.769551614412 |
|        | 75.0665411373616 | 59.4949177415847 | 94.7980740999988 | 136.913434348036 |
|        | 97.7114610828769 | 150.572774995368 | 141.154520472188 | 133.151333210366 |
| PSEN1  | 41.0180685293199 | 43.0839502646028 | 44.7190341383956 | 49.0795382664902 |
|        | 41.2424637338424 | 42.5660695551615 | 43.8206425661746 | 37.86982638952   |
|        | 43.8166226722567 | 41.8613406887824 | 43.0016969050339 | 43.0462952354436 |
| PSEN2  | 123.387418707738 | 96.577572948724  | 94.6935403697218 | 112.854520785284 |
|        | 122.988056802699 | 125.364451149941 | 113.539485042978 | 179.322661675979 |
|        | 98.4930941487534 | 142.614006543733 | 167.410607476565 | 105.515662220161 |

|           |                  |                  |                  |                  |
|-----------|------------------|------------------|------------------|------------------|
| PSENEN    | 85.9087280306456 | 68.1040271620925 | 76.0240426902567 |                  |
|           | 67.8978240198575 | 86.033725825968  | 63.1091746640396 | 129.810477623628 |
|           | 100.370937669662 | 110.219274023648 | 53.9412154719864 | 63.4323398447015 |
|           | 72.0334593545916 |                  |                  |                  |
| PSG1      | 86.4195039096886 | 40.9731067463382 | 41.8751578329365 | 38.3166554965434 |
|           | 39.2608760193011 | 39.0266821712099 | 41.0381860307445 | 38.8495095797881 |
|           | 34.5633623842083 | 36.1550293353654 | 34.064698871541  | 37.1747156131306 |
| PSG11     | 38.5007204246293 | 39.6995529770239 | 43.1931731665131 | 40.5484717678957 |
|           | 44.4489662507893 | 38.1169703906207 | 42.9803717121865 | 35.0510338774593 |
|           | 38.9006788676407 | 40.3235655331796 | 40.2649309204478 | 39.0536056496869 |
| PSG2      | 41.3785995857154 | 40.8880530359822 | 43.4544762830742 | 40.1362682639916 |
|           | 41.1868052124344 | 41.2098211956301 | 45.1694246393676 | 40.6171774724171 |
|           | 41.5635499110307 | 41.3641352453779 | 42.046575509735  | 44.1452943804044 |
| PSG3      | 45.9426591985894 | 42.2577689927563 | 43.5420658412177 | 62.3936376596431 |
|           | 40.4166536885831 | 37.842873463785  | 41.6466169548846 | 42.6022652963326 |
|           | 37.241386734757  | 40.3235655331796 | 43.9063490244748 | 37.1317006162938 |
| PSG4      | 42.0847226073592 | 41.3351256327455 | 43.2734966874463 | 41.7217466249678 |
|           | 37.7576900881741 | 40.8956286697415 | 37.6036146841933 | 40.0873854338318 |
|           | 37.3600014814388 | 39.0209841108908 | 36.8282383070068 | 38.4330755397458 |
| PSG5      | 42.5193208629123 | 36.752359121592  | 41.1367478979484 | 38.5707420487455 |
|           | 35.6434124419782 | 39.3841861812262 | 42.0605906240248 | 37.5511560880902 |
|           | 39.5806465938526 | 38.8173773425835 | 38.2293008890613 | 40.0557788909923 |
| PSG6      | 38.8336427948187 | 40.5400384479766 | 39.5185194094434 | 41.8161064926185 |
|           | 40.7779767565889 | 42.357910063876  | 39.5068753428772 | 40.6750540874299 |
|           | 39.8873706855774 | 41.0657892043496 | 43.4363579657088 | 39.2469742642337 |
| PSG7      | 39.9697332660833 | 41.2262949117288 | 40.301483914446  | 38.8495095797881 |
|           | 40.2449343247539 | 38.5252456306656 | 38.1169703906207 | 40.1474543172332 |
|           | 38.4344387289956 | 40.7620472083159 | 39.0788811357542 | 38.0958223740111 |
| PSG8      | 39.3709357615493 | 38.7344853699576 | 44.9758339877851 | 42.5664883002833 |
|           | 50.6470461863549 | 42.4580504587581 | 47.5963750520409 | 38.2782436497441 |
|           | 44.5303781239209 | 50.3388505346542 | 44.3763859390287 | 41.2437378488025 |
| PSG9      | 39.9697332660833 | 39.2907645923217 | 38.6005272730664 | 57.4595416719581 |
|           | 41.6806984441849 | 42.357910063876  | 45.7452456977857 | 39.3709357615493 |
|           | 40.9901805728485 | 39.5637454855233 | 38.079222289614  | 40.5703581862752 |
| PSIP1     | 52.7288095750893 | 63.4570909617664 | 48.9627346956003 | 56.3471340054074 |
|           | 47.3791873993182 | 81.5135916455124 | 72.0112676564347 | 54.8412943008635 |
|           | 57.1401776589964 | 88.9738853594498 | 70.5654052152116 | 71.4518820434918 |
| psiTPTE22 | 40.5654775358427 | 43.9783383422823 | 45.5883690965192 |                  |
|           | 40.0322420615846 | 44.0977148249302 | 45.6706505553383 | 42.629412460409  |
|           | 44.293922970134  | 44.0519245668737 | 41.7932258301997 | 41.3553369544097 |
|           | 40.6614700944853 |                  |                  |                  |
| PSKH1     | 42.7150227340364 | 41.6466169548846 | 38.5045333213784 | 47.0874209746031 |
|           | 46.0977687311222 | 43.1826328292558 | 42.629412460409  | 41.2551966132486 |
|           | 40.4997186069494 | 45.2556760873335 | 39.4410515050885 | 36.8690774823319 |
| PSKH2     | 31.8228237796461 | 35.6434124419782 | 35.4484652445078 | 39.5050383901884 |
|           | 41.7929491793697 | 36.4986986135769 | 36.197424053556  | 39.2672712041774 |
|           | 38.4344387289956 | 37.1275334308172 | 33.7948557837079 | 39.5418280570561 |
| PSMA1     | 267.523307072523 | 436.757445186987 | 397.745727767552 | 381.198152331624 |
|           | 358.30596676183  | 352.019218177371 | 310.461601607662 | 289.410651581802 |
|           | 385.512974999198 | 187.656257079035 | 203.203214597447 | 381.533380474563 |
| PSMA2     | 125.321349772971 | 101.940584589951 | 90.0767501615808 | 123.281175151414 |
|           | 103.356071080819 | 95.5920087912438 | 102.77259665192  | 130.261747462753 |
|           | 146.087016079575 | 112.760972238512 | 113.169111095305 | 141.376779431031 |

|        |                  |                  |                  |                  |
|--------|------------------|------------------|------------------|------------------|
| PSMA3  | 187.767803297395 | 203.53267380432  | 158.081235081686 | 169.322551237636 |
|        | 147.388500451427 | 152.86270446968  | 121.562769658314 | 212.622278823808 |
|        | 241.952522667413 | 94.1050519074545 | 118.10944558223  | 177.912351477808 |
| PSMA4  | 421.279008280368 | 454.939614583134 | 231.198764780818 | 426.015657750123 |
|        | 511.067537752967 | 314.782545392841 | 447.709872889701 | 526.750242877914 |
|        | 566.318259999405 | 263.068504548549 | 289.410651581802 | 419.741944629785 |
| PSMA5  | 1035.67547271468 | 1297.78424326775 | 922.047328788961 | 1055.69506483576 |
|        | 759.94822128584  | 577.993850127555 | 1186.06822787922 | 1123.21773312657 |
|        | 1247.50618540769 | 480.660242705293 | 511.792908607692 | 858.975085087497 |
| PSMA6  | 943.73554571528  | 1065.70206468134 | 1349.09482344633 | 1615.83220398811 |
|        | 841.850722284484 | 754.700295017212 | 1217.21440297138 | 1323.73429724066 |
|        | 1311.88650141004 | 711.773459577386 | 642.211963248041 | 1007.03747721563 |
| PSMA7  | 44.3355304829989 | 63.7721358300879 | 54.6051538001037 | 70.0402992940342 |
|        | 61.6452971581503 | 45.0882356578404 | 52.8496345990125 | 48.87875862356   |
|        | 51.0062122023297 | 43.1839109702714 | 50.2203578628217 | 51.8562635270111 |
| PSMA8  | 39.7576136507593 | 39.0894172982439 | 48.1331309338997 | 35.1451084093692 |
|        | 41.2740822675592 | 31.3901365951213 | 40.1235656101329 | 35.9023742468744 |
|        | 41.1742244762318 | 39.6719190054379 | 35.4386677371439 | 39.8497227447888 |
| PSMAL  | 38.304249186058  | 39.5050383901884 | 39.4710743516517 | 38.9534635879195 |
|        | 39.6535880152834 | 40.1428591998404 | 41.4742337714895 | 43.2551508830106 |
|        | 46.4164127487052 | 40.8970401536578 | 43.7585538437696 | 45.6692241948108 |
| PSMB1  | 1762.93413846062 | 1261.91478863258 | 1243.32650314893 | 1425.37639004849 |
|        | 1130.2486883492  | 1269.36837611919 | 1273.52492984569 | 807.620534408416 |
|        | 974.296760034984 | 1157.65264077595 | 1180.7204565402  | 1566.12726152736 |
| PSMB10 | 1105.00321488322 | 1686.40194722823 | 1783.87583818834 |                  |
|        | 1226.43929953115 | 509.671528514181 | 828.777886752805 | 1726.90584784425 |
|        | 1615.83220398811 | 1185.41286656121 | 1194.10154988793 | 1310.03307063841 |
|        | 880.992328229414 |                  |                  |                  |
| PSMB2  | 481.145001682177 | 725.680256063016 | 635.52621743309  | 500.313640131475 |
|        | 1021.71286017481 | 473.688869614777 | 969.805093523651 | 1149.02954135912 |
|        | 901.155190428891 | 351.290929267326 | 457.202737754842 | 537.213035625492 |
| PSMB3  | 1716.82239359769 | 1351.49940447914 | 1303.33517942343 | 1876.51621222292 |
|        | 1473.52943897204 | 1080.43016747082 | 2191.09005731751 | 1501.67042548971 |
|        | 2039.89728774097 | 1016.13142851085 | 923.470702344816 | 1174.92419086759 |
| PSMB4  | 993.626865290891 | 867.856842601788 | 1231.77360353254 | 935.815928529014 |
|        | 1065.70206468134 | 935.815928529014 | 1254.34397143795 | 1780.14552702126 |
|        | 1073.84987604662 | 1145.59111340228 | 856.790359133679 | 856.790359133679 |
| PSMB5  | 1093.04440713629 | 503.793770799548 | 552.480471244789 | 337.441212908704 |
|        | 684.238999553691 | 474.267141780289 | 378.12777235743  | 389.131545459708 |
|        | 567.978225839768 | 411.431488342465 | 403.243939813779 | 404.86512250958  |
| PSMB6  | 1239.68399088145 | 1480.95754707554 | 1704.0522304387  | 1297.78424326775 |
|        | 1228.1735887278  | 1364.06060391538 | 1824.79010714035 | 1387.28483887704 |
|        | 1259.2978319548  | 1178.52115916913 | 1219.52011418558 | 1087.75682788799 |
| PSMB7  | 1591.51486001004 | 1051.58050264114 | 747.975233849989 | 1037.51323185348 |
|        | 1093.84714207969 | 969.805093523651 | 1839.09068171097 | 1349.09482344633 |
|        | 1122.44489338159 | 965.530928317269 | 799.803676957263 | 955.088515235485 |
| PSMB8  | 217.263889616995 | 282.445037659981 | 263.387877739079 | 381.6928205836   |
|        | 74.1686961093736 | 125.221639689345 | 263.832968124343 | 162.908986027874 |
|        | 215.609821689043 | 139.062073456923 | 178.961579489906 | 149.397632479523 |
| PSMB9  | 112.421316052392 | 108.734392572981 | 108.976748006885 | 294.006023678979 |
|        | 45.4751076037511 | 88.1068080491008 | 138.027432399991 | 92.1151486847283 |
|        | 115.544036763985 | 65.2361525412756 | 77.1900613562529 | 66.3944891131864 |

|         |                  |                  |                  |                  |
|---------|------------------|------------------|------------------|------------------|
| PSMC1   | 1615.83220398811 | 657.031980628955 | 1061.61186520958 | 1303.33517942343 |
|         | 836.472724085903 | 1243.32650314893 | 1029.12917222294 | 1016.13142851085 |
|         | 1069.3975598703  | 1130.2486883492  | 1208.33498233518 | 1122.44489338159 |
| PSMC2   | 851.813216452015 | 664.453262499828 | 697.57030127315  | 817.631505579476 |
|         | 770.715044136717 | 887.118866402149 | 575.057786209737 | 1167.25317435052 |
|         | 902.691776563423 | 397.798003824167 | 452.139416552986 | 632.019639546131 |
| PSMC3   | 427.818758455214 | 405.496884468464 | 410.329983506955 | 465.266372824212 |
|         | 353.751797948675 | 546.287195443189 | 546.94113683381  | 477.263677441074 |
|         | 567.675954219815 | 649.487838020327 | 613.740813446728 | 462.762837284748 |
| PSMC3IP | 49.3060603897116 | 48.8842909466002 | 45.6395907124089 |                  |
|         | 41.8190986513051 | 57.5685357492202 | 51.702461863489  | 65.4561038762234 |
|         | 51.7289068180135 | 56.8622704143595 | 44.3648993568405 | 46.68364047986   |
|         | 48.0163377492228 |                  |                  |                  |
| PSMC4   | 137.239944506217 | 180.648144492464 | 206.234676343851 | 142.048367760597 |
|         | 276.747699321595 | 176.871009816977 | 275.673080691335 | 184.519582091623 |
|         | 244.089971761037 | 63.6589494264095 | 79.4832790698673 | 135.782043043499 |
| PSMC5   | 300.186402341399 | 268.419751472464 | 366.420967163945 | 277.325795311848 |
|         | 293.649670545233 | 391.658764737446 | 353.598144765197 | 411.114836576804 |
|         | 464.671881584567 | 374.427492246826 | 469.427640339806 | 370.150839052727 |
| PSMC6   | 291.64206171681  | 283.111920665176 | 272.198774144152 | 247.356027979377 |
|         | 233.72882333861  | 318.069132873489 | 198.979794834746 | 215.770028283461 |
|         | 298.031228833741 | 131.010196997585 | 148.758736522703 | 269.857104259782 |
| PSMD1   | 527.439095170064 | 550.861615347663 | 515.216890329893 | 457.502917254598 |
|         | 606.276674926567 | 677.668455095171 | 475.310458821086 | 640.407302868904 |
|         | 475.310458821086 | 329.120125961774 | 443.863346367342 | 382.538365722661 |
| PSMD10  | 180.648144492464 | 198.432987946699 | 241.849566505679 |                  |
|         | 167.999042735556 | 196.228284571015 | 190.053043382767 | 174.368595478868 |
|         | 192.763875975315 | 237.161912299581 | 130.960165577212 | 134.736333062531 |
|         | 206.072527867605 |                  |                  |                  |
| PSMD11  | 49.7188990489616 | 45.8669209716694 | 44.7829632472754 |                  |
|         | 46.614092935749  | 56.359578588344  | 51.4931742685391 | 53.0277416531043 |
|         | 56.6910078150745 | 53.6446045619513 | 47.4767851750188 | 55.3942006156899 |
|         | 46.5650556481721 |                  |                  |                  |
| PSMD12  | 735.751447981069 | 563.927521628693 | 656.355333007615 |                  |
|         | 704.15545332905  | 545.827286197333 | 534.292112344761 | 674.270050283701 |
|         | 906.833938613875 | 537.213035625492 | 739.541009338849 | 805.87120346756  |
|         | 788.232434009173 |                  |                  |                  |
| PSMD13  | 45.8108990837624 | 49.9547657591437 | 48.3458108324478 |                  |
|         | 59.4674205670657 | 47.8697093824642 | 49.9699131196797 | 40.8681871019812 |
|         | 47.4740726032707 | 56.7635847444447 | 52.4887473044594 | 55.854474649572  |
|         | 50.7975577422986 |                  |                  |                  |
| PSMD14  | 344.44626908553  | 264.600870859012 | 220.398778650109 |                  |
|         | 277.993522959259 | 290.710970844525 | 247.134338953977 | 240.431987635418 |
|         | 304.33749254654  | 222.126944340681 | 131.973056760893 | 163.971002049561 |
|         | 261.138426747953 |                  |                  |                  |
| PSMD2   | 394.60094965726  | 349.767857026458 | 393.209708455013 | 333.421080658854 |
|         | 610.678132881994 | 390.647843814517 | 454.402224020514 | 475.621740714165 |
|         | 408.080620074472 | 258.757703729905 | 297.187417426993 | 284.296510445032 |
| PSMD3   | 90.6805895192707 | 115.98265270452  | 98.8595497262968 | 98.9560329133205 |
|         | 116.694275999729 | 69.1523164481201 | 148.770228614661 | 89.3868257841517 |
|         | 235.888544042065 | 77.775644509079  | 80.2381651206227 | 75.2431285480772 |
| PSMD4   | 436.497820504526 | 375.095491465679 | 603.737787922337 | 407.564154455615 |
|         | 629.763102939071 | 688.612748336336 | 669.419736252343 | 934.48498309932  |
|         | 538.153124145211 | 354.015808474189 | 402.412173952792 | 363.67768546508  |



|          |                  |                  |                  |                  |
|----------|------------------|------------------|------------------|------------------|
| PSMD5    | 137.294289316915 | 99.135422012965  | 81.1249338842464 | 106.20479137406  |
|          | 103.792424865682 | 115.761674855716 | 121.542387231625 | 72.9752827496503 |
|          | 103.264100180823 | 96.0236731791095 | 89.5887648181505 | 88.1733775711738 |
| PSMD6    | 304.258586051126 | 489.42739398838  | 454.402224020514 | 379.865108456536 |
|          | 460.865101118125 | 459.92905629125  | 448.383843915421 | 353.338686666875 |
|          | 489.232537791775 | 219.388293203286 | 289.975375372371 | 390.906200053021 |
| PSMD7    | 634.514100741768 | 805.309720893073 | 734.143790759359 | 555.044139654886 |
|          | 559.296669575666 | 643.9329225331   | 815.810781070699 | 483.313014703768 |
|          | 570.085422388476 | 306.94883838074  | 312.40869171788  | 577.276184555955 |
| PSMD8    | 1086.12171444149 | 282.262229126907 | 174.332103484796 | 289.112248695929 |
|          | 294.220232101389 | 264.600870859012 | 567.393665550133 | 545.827286197333 |
|          | 413.31638457585  | 286.758099833009 | 324.126628444078 | 251.65044168003  |
| PSMD9    | 57.4376528157926 | 51.6869155634183 | 51.223859150798  | 64.5347406608537 |
|          | 57.1935729219207 | 59.7009992986607 | 54.339958888486  | 55.3122077514658 |
|          | 74.4958282816601 | 55.5206840401643 | 49.1067959632109 | 49.4786466722535 |
| PSME1    | 612.843402058384 | 757.257495810249 | 735.60603239712  | 735.460645553438 |
|          | 403.428042132639 | 524.451156145427 | 520.722292021743 | 523.25106120389  |
|          | 751.953794043451 | 502.205366225368 | 624.097858948785 | 657.59007878546  |
| PSME2    | 437.015713629277 | 464.99944459917  | 470.004780385708 | 406.219918936024 |
|          | 246.568253751149 | 235.195902632101 | 228.747320301945 | 224.231862271463 |
|          | 442.853589679801 | 144.063191647372 | 229.035497774884 | 261.51893439249  |
| PSME3    | 167.702870734995 | 265.367588517131 | 223.1171195512   | 130.673639258681 |
|          | 503.187121806288 | 254.756894822368 | 243.952697457779 | 236.440703574276 |
|          | 344.44626908553  | 226.168990555083 | 235.222472959869 | 230.286815921497 |
| PSME4    | 423.989018031638 | 410.979796414875 | 391.658764737446 | 246.869486382264 |
|          | 361.158558609751 | 212.813224717262 | 306.895449954881 | 1099.52344340557 |
|          | 364.337811621248 | 445.644244692294 | 430.283061862756 | 443.581460031166 |
| PSMF1    | 241.901039109114 | 183.690616959682 | 219.036267470696 | 224.14182624489  |
|          | 292.86576686019  | 300.803955139552 | 228.571334092678 | 248.599530435666 |
|          | 213.655570682141 | 313.763121699885 | 293.300203370043 | 285.459248157609 |
| PSMG1    | 136.883475451494 | 185.72957253374  | 211.164957509884 | 179.897685693038 |
|          | 277.665554240228 | 155.888873407786 | 269.745248423773 | 183.66684597416  |
|          | 244.089971761037 | 90.1696131791736 | 105.220978559157 | 126.753713093485 |
| PSMG2    | 548.815225941887 | 832.181997440212 | 822.822769402853 | 539.720977763663 |
|          | 716.754656773542 | 646.791777335656 | 618.293140877956 | 594.184150517102 |
|          | 1030.31910195147 | 424.709002690579 | 464.209794165593 | 748.913487947791 |
| PSMG3    | 111.954989477689 | 85.5135159896819 | 112.532906407663 | 75.0377156190383 |
|          | 151.99110418225  | 82.1144251872199 | 117.260454792593 | 90.0223113095186 |
|          | 142.262349841307 | 77.4046818339539 | 92.6230008876347 | 87.1109435144663 |
| PSORS1C1 | 60.8357760968871 | 69.1414574152997 | 66.0411740221276 |                  |
|          | 127.986477405999 | 67.3568864741196 | 70.5025097213784 | 67.1926218405833 |
|          | 59.7744650739434 | 73.6965494979349 | 85.0218838801011 | 70.6138659908885 |
|          | 74.7557519831859 |                  |                  |                  |
| PSORS1C2 | 40.4639532172338 | 46.9919960628953 | 64.7318794662958 |                  |
|          | 37.651298468202  | 524.451156145427 | 76.0240426902567 | 53.1884505015411 |
|          | 109.922909644299 | 52.7512110769042 | 39.8873706855774 | 48.7502645382856 |
|          | 42.2577689927563 |                  |                  |                  |
| PSPC1    | 65.3071954258488 | 76.0136947246032 | 76.2945357381722 | 69.3525901554637 |
|          | 84.9265800959529 | 81.5135916455124 | 88.5140510969737 | 81.0331497830643 |
|          | 84.4111182389028 | 70.9702772728923 | 70.9638091288679 | 82.3768788448119 |
| PSPH     | 68.4352167527791 | 69.2082505043031 | 70.2577825186943 | 58.0218262176065 |
|          | 107.827560253663 | 64.1777305915695 | 82.4362183543935 | 48.7039705048129 |
|          | 107.337113678019 | 56.4553747079294 | 52.902043370862  | 63.0266170942566 |

|         |                  |                  |                  |                  |
|---------|------------------|------------------|------------------|------------------|
| PSPHL   | 40.148780650831  | 45.1694246393676 | 45.989212296035  | 44.9370339275041 |
|         | 46.1804647841331 | 38.5252456306656 | 41.3594868055879 | 37.7612949798895 |
|         | 38.0213051227859 | 43.2988017098387 | 48.8088340735921 | 43.8575940017119 |
| PSPN    | 42.3433931248155 | 46.0023068797812 | 34.4716904283753 | 39.7411455670172 |
|         | 40.8873907150245 | 40.1428591998404 | 38.6243997507646 | 35.1738399826814 |
|         | 34.5633623842083 | 41.1222709786153 | 39.5399188536544 | 37.7526485343328 |
| PSRC1   | 53.9677557002311 | 54.0306705819541 | 53.6334631215581 | 44.4367387274922 |
|         | 64.0752803796842 | 43.1260193724086 | 73.6855877240541 | 58.6010484516703 |
|         | 63.1091746640396 | 42.5153507543837 | 41.5706032595492 | 46.5975976305093 |
| PSTK    | 46.7293238583888 | 51.8610060995363 | 56.4779645313958 | 42.1273928203021 |
|         | 58.2780916793348 | 53.3185097662527 | 48.3411413510851 | 47.7889447429963 |
|         | 50.5785738734431 | 50.6486940895674 | 50.1649089793069 | 61.9882398986333 |
| PSTPIP1 | 61.1022920882065 | 50.4872122867759 | 48.9944486068347 |                  |
|         | 105.934378627264 | 41.467005949568  | 54.7083331985678 | 51.3064929551674 |
|         | 44.0390019242862 | 37.9273653326866 | 43.0919221375514 | 48.4717951775049 |
|         | 45.4799270968969 |                  |                  |                  |
| PSTPIP2 | 70.7238101239421 | 75.7801512652102 | 82.051509943308  |                  |
|         | 232.13042919324  | 61.8471691369569 | 61.2387559102636 | 61.8571521441451 |
|         | 116.547937420457 | 85.1114448808779 | 86.6246917308185 | 76.331185787832  |
|         | 84.1030588938732 |                  |                  |                  |
| PTAFR   | 68.7436392042714 | 50.164201758929  | 42.7303139017786 | 153.153205095999 |
|         | 40.148780650831  | 44.1737502492846 | 36.5352572191451 | 42.2577689927563 |
|         | 45.5779686360641 | 42.3606390470387 | 41.8168470823451 | 50.656598108034  |
| PTBP1   | 3043.12489526581 | 4299.4451139256  | 3010.38998829232 | 1921.48678333837 |
|         | 4427.89837060471 | 1963.91365010531 | 4058.32430616734 | 3941.3269626913  |
|         | 4048.33132153903 | 2992.62035058532 | 2733.80542760533 | 2108.03351084959 |
| PTBP2   | 103.423003544792 | 80.9663216993544 | 84.8443836237906 | 67.8233625051884 |
|         | 74.4623288220969 | 199.858233616116 | 95.2996468986128 | 99.8277095030346 |
|         | 81.0169370911764 | 149.719453306304 | 134.908982962131 | 136.644759501653 |
| PTCD1   | 290.81245174957  | 297.023913988137 | 277.244576031507 | 153.595112580363 |
|         | 422.356080534477 | 196.29493890075  | 253.462941029119 | 218.19156738004  |
|         | 329.04108845799  | 273.593213694396 | 288.023490151593 | 234.45840519702  |
| PTCD2   | 59.4448586839717 | 69.0226263333556 | 76.474194677956  | 58.7338159410728 |
|         | 73.4876346170053 | 73.688423848106  | 59.1040441894478 | 50.5070012045444 |
|         | 62.370559099758  | 59.0630473216622 | 62.7248529539226 | 66.8544766980562 |
| PTCD3   | 50.9381343674699 | 45.0115870036541 | 41.437237454134  | 38.5252456306656 |
|         | 52.8190882379316 | 43.4681646416585 | 38.6243997507646 | 38.4540849632254 |
|         | 41.2870505273664 | 50.3388505346542 | 43.844855336215  | 41.4508241771315 |
| PTCH1   | 48.8333989709933 | 58.4476706144086 | 48.4890615340603 | 43.9282059368202 |
|         | 57.0504111569238 | 54.5952754712007 | 57.2758638871082 | 43.9366081640576 |
|         | 53.3094843669564 | 61.2604442862522 | 80.5508300225954 | 55.3563533836982 |
| PTCH2   | 35.0202257459026 | 38.8336427948187 | 39.7411455670172 | 36.3604951341921 |
|         | 49.9493230064613 | 40.8634043028528 | 38.941855825269  | 37.33030683349   |
|         | 43.0930293831497 | 38.3092241935352 | 49.8393069675192 | 39.4490233720848 |
| PTCHD1  | 45.1912496459517 | 169.970634268117 | 117.228320608065 |                  |
|         | 46.614092935749  | 39.859345745831  | 140.264270771578 | 86.3237770387663 |
|         | 76.3509533017572 | 76.5444845463963 | 73.1407519625966 | 98.2581979415778 |
|         | 104.704892803169 |                  |                  |                  |
| PTCHD2  | 45.2875173643252 | 46.3635803515159 | 43.4709415392696 |                  |
|         | 43.074472921841  | 43.2484996523549 | 44.8872784170036 | 43.0930293831497 |
|         | 53.2046867327331 | 43.6670755115848 | 45.6868589181768 | 44.553780984244  |
|         | 41.1554481567603 |                  |                  |                  |
| PTCHD3  | 39.8299340037009 | 39.2907645923217 | 41.1367478979484 |                  |
|         | 41.2567470068038 | 41.8407088454059 | 39.9397419279057 | 45.656343062947  |

40.9901805728485 45.334106390212 41.6657053704762 40.8730692351493  
 40.4639532172338  
 PTCRA 45.0985088502363 44.2405728317107 42.281606728072 49.085741080241  
 41.467005949568 42.9104454767916 45.9635923776719 44.1311654985682  
 39.4762546236449 43.0919221375514 40.8225507267584 40.5703581862752  
 PTDSS1 515.966709523978 675.832363405287 460.162024551004  
 443.722380814789 1379.51119430451 413.516548092483 379.933650669101  
 263.096895937991 494.162646055732 312.923326422701 267.107863045114  
 314.006301513986  
 PTDSS2 68.8698243753339 77.3367966395554 87.2316853416374  
 70.8835636550472 91.1834104205004 93.5045354990096 54.8074655158941  
 62.6386437936516 88.5564369981649 92.4534854832186 84.8084949516218  
 78.4023698691285  
 PTEN 147.371811804618 169.500205172068 199.660904693786 471.874412428677  
 138.170787392253 197.703414428714 154.019005732316 207.726011653345  
 195.146655512672 210.38953368311 172.015856827154 194.252076513619  
 PTER 45.8669209716694 53.2046867327331 56.6888826857797 40.3850714987723  
 39.9182914210537 42.6575535390785 43.1563544904505 61.8665316900291  
 55.3619977587354 43.2346122959037 59.501103909345 38.9074189954657  
 PTF1A 39.266565827316 43.1805016690297 38.9790184198145 41.7614975630362  
 38.3561682218911 40.244271403831 43.4544762830742 41.4508241771315  
 40.0403898620771 39.4710743516517 34.8383995317036 36.7762265039864  
 PTGDR 42.6036491382658 40.2493681589104 39.7411455670172 56.1780366332082  
 42.269054475455 38.1699123824764 44.0137388752186 42.157627240486  
 42.2248608921879 43.128936937037 45.1432412071268 41.5536168238478  
 PTGDS 174.263925108623 255.241295723095 171.468580016846 1009.47177197543  
 74.0149013521008 785.79878416775 55.695361644141 200.401133392259  
 35.1155486926999 90.9570747667407 105.814959179397 74.2748495231478  
 PTGER1 44.0328992213727 78.9900928241723 38.1421709520616  
 40.9607305725196 71.1607965028029 48.7781962164988 76.3583555666815  
 48.1591264215184 53.4604353973381 50.8826620053386 44.2925355984056  
 48.27609330316  
 PTGER2 55.1306642449627 59.8400088701028 52.8041782638549  
 181.814283147675 79.271901834289 58.2531879680192 49.540449125788  
 66.0303950772736 41.3803269429468 47.3791873993182 55.0404566626821  
 52.0359304386476  
 PTGER3 42.1725002904014 42.810624012519 44.1881467521416  
 40.1272810917202 41.3298593944413 43.2449987546681 40.9733310187221  
 39.1652965788406 41.3416487422364 43.6033221838149 43.401782064778  
 44.0183974528298  
 PTGER4 90.2721521466478 323.957165066178 237.4882538723  
 335.569876624791 110.214922820817 196.735144093998 112.436153468759  
 224.231862271463 197.923403667051 140.698550434486 137.555275829874  
 71.0340758556049  
 PTGES 284.241284057415 288.687391623935 235.925374041038 296.333241199193  
 323.048740324895 297.950627905767 334.527003257901 292.600202149564  
 409.724772942357 1022.76279949073 846.773659307087 552.162906190653  
 PTGES2 241.599353653369 336.051695056915 174.416924448198  
 164.917385239962 298.420882349382 164.435300801872 273.645674189546  
 151.266092912661 268.38649000825 199.970127219451 209.438270055157  
 181.844123841452  
 PTGES3 197.515728627482 275.061444728555 197.373541848064  
 183.714803682303 198.129308943666 215.290701336046 247.843927763772

|        |                  |                  |                  |                  |
|--------|------------------|------------------|------------------|------------------|
|        | 298.031228833741 | 355.288272452203 | 154.509548705054 | 169.561107057293 |
|        | 283.88971280023  |                  |                  |                  |
| PTGFR  | 41.3387790895716 | 40.4772513262052 | 39.1480645318984 | 47.8164193292842 |
|        | 41.467005949568  | 60.7488007939604 | 43.2721716572958 | 36.489383074099  |
|        | 39.4762546236449 | 40.6022003765153 | 43.5710871617107 | 37.5222959113204 |
| PTGFRN | 211.685526927495 | 129.101365145456 | 148.158262886253 |                  |
|        | 102.786429761295 | 163.62024333166  | 161.38599012777  | 117.907440794926 |
|        | 168.366869831376 | 175.820979889343 | 158.091115152384 | 158.702003835578 |
|        | 159.506157112627 |                  |                  |                  |
| PTGIR  | 51.2851682978581 | 42.9358255168086 | 49.7350276169552 | 61.2213001749372 |
|        | 46.0977687311222 | 42.8598805316863 | 46.0228732507872 | 41.7419877611072 |
|        | 44.8003345643334 | 49.7259371799014 | 39.3667161654772 | 39.3575468494941 |
| PTGIS  | 181.45962058846  | 57.0875538213735 | 51.0539624358342 | 46.614092935749  |
|        | 54.0126916508417 | 1118.62223628039 | 39.0458123429605 | 62.5528124447176 |
|        | 40.7847110517594 | 761.922486104216 | 513.891389190131 | 602.441843384617 |
| PTGR1  | 198.103081445734 | 1084.23003918768 | 322.371597171026 | 137.496822743899 |
|        | 387.749285019292 | 235.544416908354 | 775.515071756239 | 159.76714232068  |
|        | 525.687522832693 | 313.399524593316 | 363.324816966828 | 2071.90741263566 |
| PTGR2  | 112.086648546139 | 72.7987593815919 | 85.9692990407066 | 108.025082988807 |
|        | 73.1654226019863 | 77.3999378505514 | 112.362505628749 | 149.691911022686 |
|        | 86.9274372004388 | 157.394782571468 | 150.43149196048  | 112.865496075486 |
| PTGS1  | 67.3816715975056 | 49.2934904960601 | 49.9547657591437 | 96.3741876853801 |
|        | 48.7288537840562 | 852.769974690777 | 44.6809101024392 | 104.822963389102 |
|        | 45.2897806651929 | 849.412637017524 | 639.778130093087 | 318.527516338791 |
| PTGS2  | 1679.12630849964 | 483.000434270291 | 309.293546994308 | 1999.21832626916 |
|        | 530.710127703061 | 1250.15619347362 | 863.082385199922 | 1030.31910195147 |
|        | 248.390047812338 | 200.591114641608 | 335.002151198999 | 412.162238678684 |
| PTH    | 38.5332184743306 | 39.0894172982439 | 41.2365089689635 | 32.742439449766  |
|        | 40.1978874031072 | 36.2768299545794 | 41.3594868055879 | 37.4937394063612 |
|        | 36.3649677956953 | 38.5890552368865 | 39.3086414047188 | 33.977154247486  |
| PTH2   | 43.9309845324767 | 43.5182502375207 | 40.4882741869718 | 44.550322123994  |
|        | 44.4489662507893 | 40.9506062495231 | 38.1793598983615 | 41.8417024632349 |
|        | 43.9450023643394 | 46.6598879466655 | 39.153226699662  | 42.57175366709   |
| PTH2R  | 43.6706764143908 | 44.7829632472754 | 42.4580504587581 | 40.7481155008596 |
|        | 175.018819532801 | 57.2767879969284 | 45.7452456977857 | 174.416924448198 |
|        | 84.2299424587647 | 42.4594149893798 | 40.9157352260901 | 42.2577689927563 |
| PTHLH  | 79.508103983962  | 70.2288685232877 | 67.6373573669424 | 68.8167148906225 |
|        | 53.7554360529143 | 70.2021753365478 | 40.2154497375715 | 82.1344514651393 |
|        | 165.797721197832 | 65.2966707319433 | 54.2625553617642 | 70.7760293129408 |
| PTHR1  | 74.4565795414712 | 55.4106986624448 | 56.1434024065079 | 61.0845101400379 |
|        | 74.3523005665671 | 125.036267601897 | 57.2758638871082 | 57.2350830635912 |
|        | 47.4699236780425 | 89.3011777476649 | 146.311363191836 | 70.18107651423   |
| PTK2   | 546.80979198725  | 1144.34555072807 | 798.033975337132 | 260.698359835873 |
|        | 662.848386826617 | 372.02379581293  | 388.132295362791 | 369.258587948416 |
|        | 779.333013700435 | 694.590958116425 | 599.670771796585 | 798.033975337132 |
| PTK2B  | 48.6621527194963 | 46.1835531253984 | 47.2629127279171 | 54.7231416857164 |
|        | 44.2166118829877 | 48.6318631564732 | 42.5534565507139 | 45.4277931036827 |
|        | 44.7058233759912 | 49.1928206164702 | 47.1477056711335 | 52.1918130336397 |
| PTK6   | 178.400810392873 | 370.330147221688 | 292.47671022688  | 61.3149617644002 |
|        | 116.22441634196  | 66.6320017520888 | 85.6236091398006 | 191.59357986481  |
|        | 428.307428028806 | 237.4882538723   | 230.014127346507 | 244.955741307927 |
| PTK7   | 191.668846959973 | 87.3385669984704 | 95.1666040574435 | 82.0292880742189 |
|        | 91.8935361535002 | 51.6558970571712 | 88.5140510969737 | 64.3669451425581 |
|        | 87.4850071876743 | 113.612874206329 | 94.1762630490912 | 83.1308709614708 |

|         |                  |                  |                  |                  |
|---------|------------------|------------------|------------------|------------------|
| PTK9    | 39.0620487644635 | 39.2907645923217 | 39.8299340037009 | 32.7960913111995 |
|         | 34.806104801006  | 35.0970060242246 | 36.197424053556  | 37.9837233601316 |
|         | 37.2810767789306 | 41.7405682794166 | 34.6366195121669 | 44.5432192783161 |
| PTMA    | 171.176393131741 | 226.580055691897 | 84.5998418020787 | 120.980558571109 |
|         | 141.852330109472 | 140.629562742418 | 153.310447977094 | 156.433762355183 |
|         | 202.91454454866  | 95.1818735488388 | 117.948047796034 | 128.559660070271 |
| PTMS    | 392.796524588309 | 192.98559983091  | 138.81810375553  | 311.241353755918 |
|         | 120.465621774337 | 583.690350347288 | 293.755623192857 | 374.167501183341 |
|         | 279.632025097952 | 491.468862309918 | 461.83420090894  | 229.188779190649 |
| PTN     | 99.1565755621214 | 107.413918714848 | 103.316970096472 | 78.5141640924736 |
|         | 97.4137766910365 | 351.239677010973 | 131.955454394903 | 209.705575423447 |
|         | 185.812520354849 | 203.913062066149 | 217.848539722853 | 213.711954283504 |
| PTOV1   | 645.114504971255 | 1137.99307039386 | 1045.20336057833 | 522.434355629388 |
|         | 1186.06822787922 | 817.631505579476 | 915.519281747943 | 733.358170858378 |
|         | 1342.10592868516 | 1213.3477481374  | 1094.91235708087 | 784.951880532127 |
| PTP4A1  | 49.906758177954  | 56.0642694832108 | 48.6494451061637 |                  |
|         | 60.7741670229412 | 41.6340461942423 | 113.539485042978 | 63.6695826053997 |
|         | 58.026029022999  | 58.129051241441  | 62.6386437936516 | 59.1443775199516 |
|         | 72.1687283197901 |                  |                  |                  |
| PTP4A2  | 272.198774144152 | 227.439319520245 | 245.489660195494 |                  |
|         | 317.560970617018 | 262.215263489321 | 416.717470974721 | 379.098697147575 |
|         | 536.290060852815 | 404.674869177442 | 767.489657259345 | 668.584452504579 |
|         | 686.154904023493 |                  |                  |                  |
| PTP4A3  | 133.38594323309  | 87.036020750455  | 114.404099081799 |                  |
|         | 162.049698241573 | 157.082769443568 | 118.899737794318 | 64.4736987797413 |
|         | 76.1205714556592 | 61.1926647158574 | 52.9603588177082 | 76.7630128194088 |
|         | 57.3385421837183 |                  |                  |                  |
| PTPDC1  | 54.8439819445945 | 47.7902961065936 | 44.2771355310435 |                  |
|         | 46.0228732507872 | 47.2740099216972 | 48.7781962164988 | 51.8541603124888 |
|         | 52.0503062610092 | 46.8365561258461 | 61.3733228199803 | 49.8872574072587 |
|         | 53.4735821194294 |                  |                  |                  |
| PTPLA   | 62.9952378379206 | 62.801431502597  | 75.2237417063897 | 104.99788782377  |
|         | 86.4195039096886 | 397.745727767552 | 84.7782034884529 | 60.5571721986885 |
|         | 94.6300022444815 | 171.623830248512 | 148.817606651444 | 282.646286144563 |
| PTPLAD1 | 296.664472126617 | 427.540236966999 | 244.435346243998 |                  |
|         | 180.447835336714 | 355.495119544081 | 204.992039590717 | 440.421077161585 |
|         | 407.336051853854 | 295.999383698826 | 423.254211470935 | 411.857557412386 |
|         | 413.918050849658 |                  |                  |                  |
| PTPLAD2 | 335.330937634207 | 175.193752938517 | 175.056828374791 |                  |
|         | 309.06234888929  | 136.582966744378 | 148.333778341005 | 292.007249571558 |
|         | 552.860979481958 | 200.41782363596  | 463.274973266895 | 561.393215036856 |
|         | 295.014183084118 |                  |                  |                  |
| PTPLB   | 504.676944739425 | 336.490083577377 | 313.84216895297  | 272.11060969089  |
|         | 407.336051853854 | 212.436948565474 | 345.443895623911 | 465.887689708274 |
|         | 354.861943266984 | 378.626656077546 | 418.01691355558  | 321.171736253617 |
| PTPN1   | 295.127975044241 | 343.016541928592 | 334.527003257901 | 856.790359133679 |
|         | 359.082840694691 | 311.1022748407   | 307.705431227338 | 312.245547906683 |
|         | 241.849566505679 | 230.486681581762 | 298.988745247509 | 315.276749671783 |
| PTPN11  | 277.069127740648 | 325.172633427119 | 282.72662597454  |                  |
|         | 317.325808319372 | 414.293172794592 | 663.904584382358 | 338.846080983216 |
|         | 293.755623192857 | 449.701353531924 | 535.313561995599 | 441.976123154763 |
|         | 714.075528895169 |                  |                  |                  |
| PTPN12  | 229.621795088195 | 137.10896135739  | 152.395295329633 |                  |
|         | 356.025084823326 | 177.236964110663 | 186.450759425396 | 140.369714831352 |

131.365512154718 165.797721197832 144.835567449189 140.866324039667  
215.770028283461  
PTPN13 70.2541961995753 191.284436365696 224.707363813164  
53.2046867327331 86.2836002982515 92.526038865874 79.9971782971285  
78.6911549149983 205.55797140415 105.503925445543 136.935255842208  
156.36242271528  
PTPN14 47.6397712007919 50.3586212130973 59.7483827511172  
41.8778873678551 64.4999048115671 46.4648868771662 59.3549213146532  
63.287067794195 46.581796165231 55.3153799233744 63.2684764441521  
63.6254894053045  
PTPN18 46.441301934328 46.4861258030402 45.3974838013476  
40.9607305725196 39.2608760193011 40.3357777530419 41.9393838138203  
50.3972033014227 45.7452456977857 43.7303813515864 42.911855821602  
46.8129509799753  
PTPN2 63.5693267269002 58.47356854625 73.162767688847 98.8922486048877  
81.7765447802116 70.9319024596628 57.6075177910677 56.6910078150745  
85.352285669007 48.3693338695392 52.9616085459642 68.5544784190048  
PTPN20 40.148780650831 42.0709558258414 38.9790184198145  
40.4359177791566 40.6723334103791 33.0463640202858 40.3302268293707  
33.1477313087177 38.9834959368496 41.7405682794166 40.0766543123257  
37.9607839934735  
PTPN20A 39.6609238036815 45.8669209716694 42.0621425894624  
42.2496337895968 63.3638417360105 53.1052228246467 59.3549213146532  
44.0390019242862 62.0272989884264 57.6791750431251 37.2018803984555  
52.8455400026194  
PTPN20B 40.2543341073001 42.0391761199395 44.1452943804044  
43.1062482379279 42.1650127805175 41.9939782388185 40.7910160811527  
40.8907306844172 40.4518431978241 42.6366765186182 41.4727452533295  
41.5961238651523  
PTPN21 51.0225132036905 42.8542642792862 45.989212296035  
42.1273928203021 39.7568367479301 47.2009420656854 47.7390230243778  
50.7364620410977 46.4164127487052 59.8130420783374 50.7159667633757  
51.0013344286851  
PTPN22 45.1912496459517 46.9578963946094 42.0621425894624  
57.1514228214026 40.148780650831 44.6110550059573 39.8234920704779  
45.505885458784 39.3413292410146 40.2615278292875 44.1472341934505  
38.8495095797881  
PTPN23 68.7436392042714 73.2842501003097 76.3583555666815  
71.7167037224069 83.9387217886961 61.9432904657734 97.712117589297  
82.7269382676336 72.7071934110997 99.3142021810133 84.1112814779578  
67.8335962843732  
PTPN3 74.2151462073098 65.485076402841 63.5107036952143 32.7960913111995  
63.1443731864055 39.2248354955045 63.1604223919703 56.2441895183416  
71.3932787152381 65.813547096222 73.408861359425 104.860298453006  
PTPN4 95.8734933265537 87.2351169088172 106.175784900392 118.316810638061  
113.866742186841 83.5274372175811 103.75895351937 177.688415930665  
104.341160312305 122.576931376426 122.15017220566 99.9685666586407  
PTPN5 37.2474303302343 37.958111840848 40.0557788909923 38.4208429103799  
37.7576900881741 35.7034203372528 38.1793598983615 33.6816578730693  
36.7604001262514 32.7592428612505 36.9802857205455 35.9016808898213  
PTPN6 99.2575888644764 143.997817398894 134.601217321316 335.943994595615  
88.051652677564 102.394035383591 137.764748752401 115.221134337342  
144.711001798454 116.951729886784 114.507139252014 93.691983111538

|         |                  |                  |                  |                  |
|---------|------------------|------------------|------------------|------------------|
| PTPN7   | 50.1912176441302 | 52.3579564953125 | 48.2314980343598 | 62.6048727240291 |
|         | 41.4397539024976 | 45.6706505553383 | 45.1017494688414 | 47.9942520395434 |
|         | 41.4397539024976 | 42.5193208629123 | 46.2560238004757 | 41.3948836161924 |
| PTPN9   | 53.1943148668994 | 63.7963501146829 | 47.2962360458401 | 48.1662933382789 |
|         | 55.4030910454028 | 49.3654837541353 | 55.5578334877425 | 57.1362071277099 |
|         | 61.6839343510302 | 55.1804535845496 | 54.1618170692792 | 54.0374522273907 |
| PTPRA   | 101.448989278761 | 102.880267177687 | 118.771995863848 | 90.385018479478  |
|         | 123.618276821013 | 92.8131698915896 | 105.317399386109 | 84.0305689846475 |
|         | 86.4898752526885 | 116.099186392258 | 102.797268694325 | 95.8734933265537 |
| PTPRB   | 59.3923286524971 | 71.6537776654915 | 109.979856686854 | 103.349712762251 |
|         | 66.1650385535549 | 88.8760662992208 | 43.4544762830742 | 52.407151732257  |
|         | 66.1448688879431 | 51.2318935933116 | 69.8899273527731 | 64.9418945936106 |
| PTPRC   | 38.7277789106124 | 42.7275315121163 | 42.5988949509468 | 67.6034960135297 |
|         | 39.859345745831  | 42.0106197763828 | 39.0727573019762 | 41.9704647265931 |
|         | 40.8970401536578 | 39.2968590261598 | 41.5721487850586 | 40.8098117292322 |
| PTPRCAP | 48.2910530887214 | 87.6763065012524 | 59.4431489877328 |                  |
|         | 122.217982672531 | 44.8897737954573 | 40.040778349137  | 50.5252048155459 |
|         | 48.4670130605028 | 42.6366765186182 | 55.9283039581662 | 64.3824529624475 |
|         | 49.5539622682049 |                  |                  |                  |
| PTPRD   | 64.8367546135053 | 38.2835812177457 | 40.1985790927248 | 48.3772965749984 |
|         | 42.4864576619427 | 79.3066495980045 | 36.9976231206067 | 38.5457716679071 |
|         | 41.5635499110307 | 63.340012816413  | 52.5586058896479 | 48.6037684272115 |
| PTPRE   | 99.2341244350412 | 224.749607192071 | 120.26537515666  | 433.89783033465  |
|         | 103.67004664951  | 105.580434427464 | 101.549779766678 | 107.337113678019 |
|         | 60.2867996701867 | 89.4380336458796 | 86.500678864429  | 89.3868257841517 |
| PTPRF   | 1055.69506483576 | 874.419252731128 | 945.065986430527 | 101.2825552085   |
|         | 581.093069802913 | 213.140641182603 | 614.088027946471 | 1119.61164710566 |
|         | 1357.41745370754 | 989.0602710707   | 750.151825182993 | 736.405815842011 |
| PTPRG   | 41.9407041937973 | 41.3610369241157 | 41.2365089689635 | 37.7469621225553 |
|         | 49.5666074434383 | 46.574682061365  | 37.830876898596  | 39.1652965788406 |
|         | 50.7619345314571 | 36.6893251782922 | 44.1148826235374 | 41.9430737035925 |
| PTPRH   | 50.6473771879221 | 44.1239711172417 | 34.2890785915814 | 38.4208429103799 |
|         | 33.7494761745342 | 40.5281496800812 | 51.0013344286851 | 39.6474008369935 |
|         | 51.4413099192899 | 36.3612409063792 | 45.2265319826548 | 41.4508241771315 |
| PTPRJ   | 40.148780650831  | 44.2630383225933 | 43.7630587657205 | 78.0020909283414 |
|         | 43.2484996523549 | 48.5835484742456 | 51.5967098638347 | 44.1311654985682 |
|         | 44.5303781239209 | 38.957687788868  | 44.1148826235374 | 45.1735152121056 |
| PTPRK   | 367.343410874234 | 361.524083649962 | 509.463928291526 | 125.333208461509 |
|         | 235.222472959869 | 189.451890957713 | 299.476376921942 | 135.829530518199 |
|         | 323.515041493836 | 294.048088688381 | 287.121456559795 | 311.810240385503 |
| PTPRM   | 129.185046410316 | 393.001025840896 | 389.994289973076 | 195.482216656634 |
|         | 736.846933148564 | 240.139560726101 | 376.749116251503 | 175.28322146764  |
|         | 415.251775687794 | 294.048088688381 | 332.659496278775 | 297.187417426993 |
| PTPRN   | 35.7012997405508 | 39.2907645923217 | 41.6079958749402 | 57.2856683017619 |
|         | 39.0564222526273 | 38.6414316877471 | 46.4388841354122 | 37.1317006162938 |
|         | 36.5393857306744 | 42.4594149893798 | 45.6348103033479 | 38.4330755397458 |
| PTPRN2  | 41.7397731376692 | 45.0905928998779 | 42.3536549114165 |                  |
|         | 44.4367387274922 | 37.1565984182084 | 49.2050538150106 | 41.3594868055879 |
|         | 45.1714698794331 | 41.863927676552  | 69.1623287497421 | 62.0404348860702 |
|         | 75.9136854087044 |                  |                  |                  |
| PTPRO   | 51.2318935933116 | 44.7829632472754 | 41.7419877611072 | 75.8306078651291 |
|         | 40.6723334103791 | 42.1046072075724 | 40.9157352260901 | 43.0930293831497 |
|         | 46.0106098064475 | 75.4053820110486 | 54.5222652584532 | 49.6203214143464 |

|         |                  |                  |                  |                  |
|---------|------------------|------------------|------------------|------------------|
| PTPRQ   | 47.4678477186801 | 44.4411734611229 | 45.8844325913247 | 43.5627649099623 |
|         | 39.2608760193011 | 45.8325181856483 | 47.1345949868029 | 44.9977782988116 |
|         | 84.0899854321388 | 61.4569050766419 | 51.9302027391447 | 60.4872675915085 |
| PTPRR   | 46.263826584899  | 117.556281726503 | 44.6511073781104 | 51.0175677516029 |
|         | 60.7999610195859 | 41.7627910693483 | 68.878562323012  | 46.3685439301234 |
|         | 101.375030043104 | 76.0532592222027 | 84.0650191680213 | 144.813029178278 |
| PTPRS   | 45.7017023767682 | 45.4143854024453 | 41.554942319225  | 38.5252456306656 |
|         | 41.8806343997257 | 41.3553369544097 | 41.1886975241176 | 45.642304356051  |
|         | 43.6670755115848 | 46.0119912782855 | 44.5152708955623 | 41.4508241771315 |
| PTPRT   | 42.1650127805175 | 41.6757511223421 | 40.8420925848403 | 40.1321264723693 |
|         | 42.0709558258414 | 38.8336427948187 | 37.6527901109005 | 74.7794253940974 |
|         | 40.0403898620771 | 45.3947052423717 | 42.357910063876  | 42.357910063876  |
| PTPRU   | 63.3717459766798 | 68.878562323012  | 87.7652813158198 | 37.7146582037126 |
|         | 53.0419743379342 | 36.8059561571675 | 39.2533668167483 | 59.5830868881343 |
|         | 58.2401724760744 | 65.5996869277644 | 64.6446465846487 | 72.4094549259929 |
| PTPRV   | 43.1805016690297 | 41.8073910693411 | 42.7303139017786 | 45.1944222548351 |
|         | 45.1137938810047 | 42.357910063876  | 47.4439407315335 | 45.7476095696859 |
|         | 43.5669306063196 | 42.8936990772838 | 41.4508241771315 | 44.5432192783161 |
| PTPRZ1  | 40.6559419616644 | 35.6434124419782 | 42.5406888281114 |                  |
|         | 36.5393857306744 | 46.0043807840705 | 43.4681646416585 | 41.706879587091  |
|         | 42.5435283762933 | 66.7008819035152 | 39.4710743516517 | 50.7159667633757 |
|         | 47.1060577218993 |                  |                  |                  |
| PTRF    | 999.13039066242  | 237.039707901886 | 408.080620074472 | 405.322894577918 |
|         | 280.820745089796 | 2091.0611913538  | 69.3468840908665 | 356.318517117856 |
|         | 156.79660458088  | 1313.92053019421 | 1384.80615431656 | 1756.86714809925 |
| PTRH1   | 154.149426842591 | 88.4740208892504 | 94.717335243904  | 83.877343750194  |
|         | 156.02592319461  | 116.76301232629  | 128.024853362102 | 128.503671563486 |
|         | 76.7100878053735 | 54.7827221235949 | 101.065203693106 | 93.3644318958633 |
| PTRH2   | 225.760096749053 | 184.938142193035 | 157.856158440506 | 190.548265163011 |
|         | 299.890705180422 | 172.252848888699 | 214.586915093492 | 208.504992019122 |
|         | 241.24267509333  | 109.738537924214 | 120.289145237975 | 161.739131587013 |
| PTS     | 253.841638589385 | 226.288835947947 | 259.332340491331 | 197.011675186182 |
|         | 238.893145911331 | 264.495576211074 | 211.164957509884 | 187.422036538629 |
|         | 249.195312452368 | 158.998384690038 | 163.844659359002 | 311.502922515027 |
| PTTG1   | 302.79352975792  | 212.436948565474 | 219.34503297115  | 159.554916039519 |
|         | 379.098697147575 | 79.5619528847913 | 426.622204035624 | 421.013324906569 |
|         | 507.239294307089 | 83.5069968129733 | 69.9652162720742 | 130.002385558757 |
| PTTG1IP | 1656.16581692717 | 1186.06822787922 | 1521.20630233299 |                  |
|         | 917.179747195874 | 958.473187253938 | 1016.13142851085 | 895.735191953679 |
|         | 794.806085783439 | 1024.97546870349 | 994.404707955031 | 959.549658414082 |
|         | 943.73554571528  |                  |                  |                  |
| PTTG2   | 87.799979434508  | 102.993620677265 | 106.058751335133 | 95.3070802596041 |
|         | 136.429803886927 | 149.076166432567 | 91.116454717205  | 70.6568303458436 |
|         | 144.500148287951 | 100.344513700137 | 83.5895816521251 | 92.3388129097482 |
| PTTG3   | 151.472676874224 | 128.146059846414 | 115.840734064724 | 92.8026641003757 |
|         | 204.862161704394 | 58.8605811695948 | 222.92930674999  | 273.320144423733 |
|         | 248.438376348617 | 78.0658258913875 | 61.940656536312  | 82.5312123120641 |
| PTX3    | 39.5676051939342 | 38.5252456306656 | 37.2838080935695 | 40.9607305725196 |
|         | 46.7508829977587 | 45.4882438975269 | 40.6750540874299 | 40.6171774724171 |
|         | 41.6616444147804 | 43.6033221838149 | 38.4689132737495 | 45.6692241948108 |
| PUF60   | 1910.5347560855  | 1783.87583818834 | 1255.10866316499 | 805.309720893073 |
|         | 1652.85734308754 | 1018.35211991691 | 1513.74711975248 | 798.033975337132 |
|         | 1917.90025587049 | 925.486088550061 | 1448.17151189672 | 810.021622878441 |



|       |                  |                  |                  |                  |
|-------|------------------|------------------|------------------|------------------|
| PUM1  | 608.005012673672 | 736.626341475753 | 762.855719373733 | 505.294880430281 |
|       | 929.862002014478 | 696.946621824188 | 1080.43016747082 | 796.359355922952 |
|       | 740.423874031773 | 929.862002014478 | 1141.25078954012 | 894.486674059951 |
| PUM2  | 496.791391622565 | 335.167786298149 | 312.795596385258 | 327.912730756303 |
|       | 322.229113548162 | 361.158558609751 | 349.767857026458 | 499.356036793973 |
|       | 350.451704069255 | 354.38923772101  | 387.471577602679 | 429.65084326307  |
| PUNC  | 43.0930293831497 | 36.9994058279362 | 44.1452943804044 | 40.3180310664156 |
|       | 58.037539503209  | 37.0180934800573 | 42.357910063876  | 53.2046867327331 |
|       | 40.6957787921451 | 36.5806287103157 | 48.042366934301  | 34.4570158133896 |
| PURA  | 93.7352369697358 | 70.9970523709176 | 75.1853590860646 | 61.5515639412892 |
|       | 63.1944558106132 | 142.124053129543 | 66.1940959364976 | 76.3509533017572 |
|       | 98.1070136863302 | 171.1557159962   | 150.875092086496 | 131.496769528338 |
| PURB  | 586.735744054398 | 442.546348599648 | 454.106740411779 | 625.435083064752 |
|       | 438.681666410245 | 491.284423079101 | 483.20917825594  | 624.954583057431 |
|       | 635.288331955846 | 645.114504971255 | 570.824732318332 | 610.853753376105 |
| PURG  | 47.6397712007919 | 55.8678615468603 | 52.8041782638549 | 43.7410507935043 |
|       | 53.9488501599452 | 44.1737502492846 | 49.540449125788  | 53.2808392130566 |
|       | 44.0256815382334 | 46.441301934328  | 49.2206713037152 | 46.8129509799753 |
| PUS1  | 329.282615395786 | 272.828896268482 | 290.546420262364 | 141.266956686625 |
|       | 384.727543700024 | 137.509582795609 | 297.332750143067 | 171.877918435017 |
|       | 295.5163490537   | 184.201497822259 | 215.770028283461 | 169.061093538895 |
| PUS10 | 59.987045425047  | 48.275452803061  | 44.4311655729487 | 54.8412943008635 |
|       | 49.1928206164702 | 46.6872654833579 | 54.4934782594218 | 42.7431359850339 |
|       | 60.4837400912239 | 52.0999467564713 | 46.1673159982664 | 45.9693232070002 |
| PUS3  | 91.4446109489387 | 74.3239491140189 | 67.9306669919176 | 84.8948024208923 |
|       | 84.8084949516218 | 87.2437977005922 | 66.3944891131864 | 145.459578481501 |
|       | 63.664265793911  | 75.9037617394486 | 79.1922819549042 | 94.2090303695946 |
| PUS7  | 173.838110431513 | 125.027865666372 | 131.517202728816 | 80.0042268333735 |
|       | 355.7118155732   | 124.751020763508 | 186.759757179509 | 176.181618993328 |
|       | 234.556113280762 | 95.8075612515186 | 117.586275152761 | 111.607814098243 |
| PUS7L | 62.4317959077388 | 57.5197017161209 | 59.2778887402357 | 61.2213001749372 |
|       | 61.5236837309467 | 70.2553917409773 | 68.2708120569221 | 97.7415824971555 |
|       | 65.564930068976  | 59.8130420783374 | 58.2941346100716 | 60.3816817102326 |
| PUSL1 | 98.4084364053686 | 96.6359641162026 | 118.951970882732 | 84.2804410361247 |
|       | 168.503424269691 | 67.0290776715331 | 187.767803297395 | 190.703466372947 |
|       | 120.26537515666  | 88.0664425843955 | 80.4239296853518 | 74.5886835786452 |
| PVALB | 43.844855336215  | 96.1710806345503 | 46.0727230219512 | 50.8567345921473 |
|       | 40.7779767565889 | 44.8872784170036 | 61.5000955267432 | 44.293922970134  |
|       | 43.3744503319109 | 276.666571115104 | 68.0414563597154 | 273.540763256424 |
| PVR   | 113.113062709739 | 70.8546350449171 | 68.7091708087448 | 71.5249259772583 |
|       | 121.023370640285 | 71.0197205018137 | 91.2330127140591 | 210.032782918825 |
|       | 61.5807110546718 | 66.274247400793  | 76.9454624478854 | 78.0006681166995 |
| PVRIG | 47.7267190613906 | 78.4289643729837 | 66.4079972657486 | 112.585860083115 |
|       | 40.3452320167286 | 36.6271061451613 | 46.1634822993009 | 52.6960621424156 |
|       | 36.5393857306744 | 54.2830238965339 | 57.4622430729629 | 42.1537476443423 |
| PVRL1 | 48.1481623841024 | 54.3554233228353 | 74.3981029634178 | 42.0102671859606 |
|       | 66.4462382864605 | 42.1957516560122 | 62.6532574724345 | 59.0262390168156 |
|       | 74.8893925448138 | 66.5063354430003 | 54.2625553617642 | 70.1347490781514 |
| PVRL2 | 175.508659149068 | 113.30970148672  | 145.027715477051 | 148.198469375575 |
|       | 158.66112269515  | 97.3443444704601 | 145.847014515246 | 230.197573134703 |
|       | 161.326580647514 | 95.3145142003966 | 123.608921653229 | 95.491982090349  |
| PVRL3 | 58.4139484810943 | 75.9236575152151 | 78.7496673195407 | 67.9728793995736 |
|       | 95.5079495291324 | 120.123385036416 | 117.260454792593 | 123.689895848613 |
|       | 86.3289616331597 | 78.7543199947688 | 104.341160312305 | 87.799979434508  |

|        |                  |                  |                  |                  |
|--------|------------------|------------------|------------------|------------------|
| PVRL4  | 55.1306642449627 | 72.2610650652674 | 69.7855392178808 | 39.3750969348308 |
|        | 68.6627996695828 | 43.4681646416585 | 69.3468840908665 | 65.5820437889838 |
|        | 118.762101740563 | 46.5650556481721 | 58.5588286084726 | 55.6351010690528 |
| PVT1   | 45.3872406432794 | 57.1595768494068 | 48.1331309338997 | 46.3203995372658 |
|        | 60.7495043977707 | 52.3187919317561 | 60.2399886747451 | 41.4508241771315 |
|        | 51.6731332961917 | 40.8049408996274 | 43.7585538437696 | 51.9447450229707 |
| PWP1   | 358.498678171092 | 383.705244574204 | 439.106576928682 | 352.292837622545 |
|        | 476.421959423835 | 479.318513108472 | 456.023620287811 | 348.913213159222 |
|        | 424.182335137838 | 288.597205372736 | 266.865951970965 | 331.591589534469 |
| PWP2   | 42.8036731479932 | 36.7976562409506 | 41.437237454134  | 40.7481155008596 |
|        | 53.5594683028749 | 36.3845892764084 | 39.2533668167483 | 35.3608605269276 |
|        | 48.4869909888679 | 37.1275334308172 | 47.4630625313159 | 32.7800533388945 |
| PWWP2  | 44.5282181324797 | 73.449126698983  | 58.1840322066411 | 39.6292788039793 |
|        | 49.6507190068324 | 41.6590564937735 | 41.9393838138203 | 47.2864663693787 |
|        | 52.8906306272785 | 42.7275315121163 | 55.6972661824064 | 51.2776048338    |
| PWWP2A | 79.1369056968656 | 57.8405769800773 | 50.2869791217819 |                  |
|        | 60.7741670229412 | 56.1186281675573 | 64.3383155834968 | 55.4004611309636 |
|        | 45.9604707098953 | 59.0563795877672 | 73.1407519625966 | 74.1425714439424 |
|        | 75.1674447943072 |                  |                  |                  |
| PWWP2B | 94.8260360398356 | 256.843419520398 | 178.661935292895 |                  |
|        | 86.2488614616838 | 165.190373710254 | 86.2118355769367 | 155.564141715819 |
|        | 161.109600577001 | 125.868437542325 | 136.293724800658 | 170.223657280542 |
|        | 116.066916521887 |                  |                  |                  |
| PXDN   | 299.428590398636 | 77.1737254584648 | 90.7037473522607 | 71.9062462001972 |
|        | 160.566474370004 | 117.127994102455 | 37.0564573649223 | 61.5000955267432 |
|        | 38.1169703906207 | 57.8585041080995 | 47.0110068985119 | 104.398842509776 |
| PXDNL  | 40.9201978689462 | 41.9397336249742 | 39.7411455670172 | 39.7411455670172 |
|        | 39.0916553915607 | 40.5710637884029 | 37.0011886211643 | 38.8495095797881 |
|        | 39.1790517315259 | 42.4301183791899 | 38.8193634966943 | 39.8845726397282 |
| PXK    | 47.8249696958403 | 49.6203214143464 | 50.6987358483181 | 68.9937449813561 |
|        | 53.9074374788981 | 70.7238101239421 | 61.6544855697851 | 54.6067620335514 |
|        | 49.8304479381623 | 48.7414853386615 | 54.7061116419212 | 60.0940570991178 |
| PXMP2  | 87.7460859694899 | 99.5192591352063 | 131.156876010639 | 62.5266621798326 |
|        | 144.578232267116 | 108.779357041421 | 217.617227445082 | 70.8546350449171 |
|        | 202.914544454866 | 75.2053836356882 | 80.0919469092368 | 84.0733026747075 |
| PXMP3  | 114.979124960177 | 198.226275659825 | 152.612579631539 | 104.158950889938 |
|        | 106.58628367621  | 139.625593914573 | 115.087963545095 | 76.7137782332689 |
|        | 131.277614500948 | 85.3718124658316 | 98.9113424606303 | 155.519517541864 |
| PXMP4  | 40.8091178323174 | 52.5868047927666 | 58.0722340887264 | 47.7362556248858 |
|        | 66.0411740221276 | 49.2871583830897 | 52.3242437351389 | 47.9363875418976 |
|        | 57.5430365699386 | 47.611018474151  | 54.5222652584532 | 55.1804535845496 |
| PXN    | 60.8357760968871 | 51.3084273211359 | 55.9459886217809 | 58.9168466928565 |
|        | 68.1674425673171 | 46.0364000143537 | 45.6042625176633 | 51.7538628098347 |
|        | 75.7991766454243 | 93.5511826850067 | 60.4620008899889 | 58.3586374083245 |
| PXT1   | 39.0620487644635 | 37.6383530120621 | 42.4580504587581 | 39.3750969348308 |
|        | 40.9950639693255 | 38.4330755397458 | 34.9344532055397 | 41.8417024632349 |
|        | 39.4762546236449 | 37.3179578037963 | 40.723990462047  | 35.6427313468066 |
| PYCARD | 221.743315748689 | 522.811631783729 | 514.261598258395 |                  |
|        | 503.187121806288 | 323.957165066178 | 236.178265404264 | 384.727543700024 |
|        | 1045.20336057833 | 309.102633242573 | 305.399644617845 | 241.486113826383 |
|        | 278.140612054333 |                  |                  |                  |
| PYCR1  | 79.172237641942  | 57.9968895221633 | 37.2323337440872 | 44.4367387274922 |
|        | 85.9555871743678 | 46.6463732236148 | 59.8273072817267 | 76.0709828871754 |
|        | 63.3121284680843 | 39.9948390976317 | 42.2618615571566 | 41.5083179498332 |

|        |                  |                  |                  |                  |
|--------|------------------|------------------|------------------|------------------|
| PYCR2  | 182.273794635176 | 404.674869177442 | 625.435083064752 | 197.540681021755 |
|        | 392.122735729786 | 256.215133513379 | 348.123960682064 | 290.448089141121 |
|        | 313.921236120658 | 364.439669236186 | 486.044304392285 | 396.261110334324 |
| PYCR1  | 42.2455707947223 | 47.4740726032707 | 41.8751578329365 | 39.6292788039793 |
|        | 50.2163892855092 | 39.4953494583071 | 47.2927436772465 | 41.6466169548846 |
|        | 43.5669306063196 | 44.4652605017595 | 47.0110068985119 | 42.8864415494484 |
| PYDC1  | 41.7397731376692 | 50.6774883370457 | 38.8775560911841 | 41.0726336841311 |
|        | 40.5710637884029 | 42.6575535390785 | 37.4772922422734 | 38.1835938174625 |
|        | 42.0621425894624 | 36.5806287103157 | 39.6403089864678 | 36.7762265039864 |
| PYDC2  | 43.7585538437696 | 40.9731067463382 | 35.6139301508335 | 38.3166554965434 |
|        | 43.5544347011646 | 47.6803619768589 | 38.7337086062875 | 45.3872406432794 |
|        | 47.7086093893038 | 43.4885245598939 | 43.844855336215  | 46.0633179231318 |
| PYGB   | 289.843931942051 | 160.303575545559 | 170.720099897973 | 173.925818790068 |
|        | 212.99813190918  | 720.90955999917  | 242.080992016235 | 198.288493088076 |
|        | 172.039289618908 | 626.749986744506 | 492.13077103258  | 507.239294307089 |
| PYGL   | 270.756849919679 | 143.391384762612 | 251.854446030066 | 172.89937021234  |
|        | 242.016748817428 | 112.421316052392 | 102.77259665192  | 180.916465721523 |
|        | 379.79657860938  | 498.608204176238 | 337.948887427898 | 420.197648653758 |
| PYGM   | 39.1590964332473 | 40.716553247236  | 40.931294690669  | 37.5382094267692 |
|        | 38.2496050953547 | 55.1037284831588 | 48.4859552186772 | 51.6660481331154 |
|        | 45.7452456977857 | 50.7855742231932 | 53.0177144132449 | 50.8442982601142 |
| PYGO1  | 37.6397652536077 | 42.9358255168086 | 37.0642268327439 | 42.4580504587581 |
|        | 47.2074332636566 | 40.3357777530419 | 39.1539892144371 | 43.6434576713809 |
|        | 40.8970401536578 | 38.8507804383261 | 41.6336636285875 | 42.57175366709   |
| PYGO2  | 135.00141569592  | 53.3094843669564 | 86.500678864429  | 52.5307002738469 |
|        | 102.77259665192  | 63.8740412329753 | 104.821285642918 | 101.028327489559 |
|        | 82.0993943936197 | 134.152059562322 | 127.708268637068 | 83.0460206754856 |
| PYHIN1 | 47.6938628797168 | 52.6986567933752 | 51.1347974668251 |                  |
|        | 83.374777060444  | 42.8414096678708 | 43.9421822132391 | 42.357910063876  |
|        | 45.8095171770165 | 40.9532623519852 | 44.9603714724456 | 45.6895223823001 |
|        | 42.7782216342806 |                  |                  |                  |
| PYY    | 41.5421429082231 | 36.2103905554984 | 45.989212296035  | 34.6468794865286 |
|        | 36.4434672195785 | 43.2805590023412 | 45.8980298854198 | 39.853866204927  |
|        | 36.6312676076142 | 41.4397539024976 | 35.6041926503637 | 35.2448979801094 |
| PYY2   | 39.7576136507593 | 41.1212129940704 | 39.4710743516517 | 45.1151758109609 |
|        | 40.2449343247539 | 40.1930209223556 | 40.4359177791566 | 38.5457716679071 |
|        | 37.4937394063612 | 40.4136535208406 | 37.33030683349   | 40.1700117452801 |
| PZP    | 42.0532901689036 | 44.9370339275041 | 44.1452943804044 | 37.0732977341185 |
|        | 44.147557390293  | 43.8582747295766 | 40.4359177791566 | 44.293922970134  |
|        | 42.4540072551568 | 41.1222709786153 | 46.0095710163378 | 35.5523662009011 |
| QARS   | 875.139073253298 | 1642.75555340648 | 2004.94135236716 | 885.224377292125 |
|        | 2160.22713775462 | 1062.93431683428 | 1585.90718459092 | 1214.73798692268 |
|        | 1330.19215036764 | 2232.61002288121 | 1585.90718459092 | 1405.20888023653 |
| QDPR   | 225.690879436355 | 300.732955139561 | 300.560071753181 | 229.035497774884 |
|        | 319.596352961751 | 329.120125961774 | 278.773982275525 | 185.191228931155 |
|        | 348.450810225807 | 307.394333843045 | 370.150839052727 | 296.463473585355 |
| QKI    | 38.9229928131225 | 47.0130468198828 | 47.5673419710251 | 64.1267046511632 |
|        | 49.3984571719129 | 58.3882937676176 | 50.6774883370457 | 41.6045220683604 |
|        | 42.7671420440641 | 39.6719190054379 | 50.0583709690359 | 45.5238446102876 |
| QPCT   | 73.0186209472046 | 105.05842887748  | 243.015896514493 | 348.862367731887 |
|        | 70.0133734659853 | 93.5928272702304 | 257.851199206959 | 116.617120294216 |
|        | 120.571680725698 | 147.115466503902 | 156.591349262922 | 390.906200053021 |

QPCTL 54.931538325692 49.2934904960601 46.4569566520107 54.6089451252049  
 69.6330393135101 45.1873487463472 53.3111230705754 47.0940613507321  
 45.4799270968969 41.4397539024976 45.390192977585 43.8575940017119  
 QPRT 648.885062676884 109.130081850144 102.734042853587 184.235914591152  
 229.379918828848 143.773311381452 426.145924040944 1418.94307844471  
 58.9056300364078 396.782162132908 260.15500351311 155.82546212052  
 QRFP 33.4902421268456 34.0382693188794 35.7105247506212 38.3166554965434  
 38.9496515344837 42.9695585740813 39.3585350448719 36.1375121409002  
 43.1805016690297 37.4302011516587 43.1931731665131 40.2669497398702  
 QRIC1 139.855023065402 218.675464231277 215.907790093087  
 172.237164781821 247.47601939651 165.942795019496 199.23413224268  
 128.219615202232 208.189151365575 214.281036491237 187.560170529807  
 173.434174644937  
 QRIC2 40.3478825593224 39.2907645923217 40.931294690669  
 45.1944222548351 38.3561682218911 37.3799542961839 38.6243997507646  
 43.3262148375525 37.8319142847141 38.2069499294002 39.7342718293432  
 37.4554876386402  
 QRSL1 52.4179224871914 43.8495248991589 43.0016969050339 43.5627649099623  
 45.6895223823001 44.1737502492846 38.7337086062875 44.4031868028216  
 37.3600014814388 39.4710743516517 42.357910063876 39.9519547348106  
 QSER1 41.8409927585705 37.8217989841918 39.8299340037009 41.8291484190524  
 47.9128504683618 39.1664256481434 34.806104801006 39.1128725343972  
 39.8873706855774 38.4829727716328 39.9586075662602 37.9607839934735  
 QSOX1 168.91210897306 136.451598654243 103.577201248705 124.803597244786  
 85.6038071277319 150.709301569371 117.962374539153 92.4016365536782  
 124.890309370032 124.56803502087 150.661852768073 145.01315947031  
 QSOX2 118.762101740563 121.84142967836 73.967017874248 75.6103053700122  
 168.407377937447 84.056083317311 112.113501370522 82.3364971911816  
 65.2125527940945 82.2431666775699 87.036020750455 73.0333258448698  
 QTRT1 85.2893380711323 98.0023132593711 111.357508398822 54.8412943008635  
 206.514263103112 89.9789975503195 80.4479092568961 102.00080367858  
 90.8492959457035 109.192770642308 112.881899194726 86.4937293696262  
 QTRTD1 57.0524725494273 68.456297913777 58.2251348002272  
 38.6835649080278 92.6736029146947 54.5952754712007 62.8534105935806  
 54.2877981508636 62.0272989884264 52.0999467564713 56.7272804480684  
 60.5948704279864  
 R3HCC1 159.071016200059 104.492750153479 167.746168796779  
 163.360824752796 101.46584765758 229.26498093497 178.98901256658  
 95.9391851122771 132.57180783668 171.722423740869 177.688415930665  
 122.160438114932  
 R3HDM1 52.6960621424156 50.2163892855092 49.965271003193  
 47.8947595316832 52.6226745117396 54.1440452292081 50.6774883370457  
 52.9153129566242 55.4635297192076 55.5206840401643 48.4717951775049  
 49.8472708021525  
 R3HDM2 60.4593810615882 53.3094843669564 57.423873475544  
 51.7739270955254 58.9875400392427 47.0940613507321 53.1884505015411  
 77.6174893940285 63.2753814090696 71.9124897002253 51.0492389286271  
 54.6659845741133  
 R3HDML 44.6231541342 36.89524015739 42.9104454767916  
 43.6726153508978 41.7929491793697 42.4580504587581 41.1507980856436  
 33.3307770183871 38.0213051227859 39.1621898366355 40.8225507267584  
 33.6902293666089

RAB10 917.179747195874 885.224377292125 1115.27580736237 933.968759959712  
874.419252731128 685.386956092142 1068.10627239579 2232.61002288121  
1339.29022988209 1051.58050264114 953.143041145545 1252.94510628089  
RAB11A 1307.19925493293 1932.2647526188 1046.42391243532  
593.345148568451 1197.13566108661 801.351998609551 1891.37245670852  
2313.21212353993 1533.38581753491 1796.47241860175 1850.06063216244  
1578.32969650385  
RAB11B 47.5647821785529 56.1355483199198 59.0308764112247  
41.0726336841311 59.5844022026141 49.3172204533818 55.0897019602305  
43.4544762830742 54.998510746958 45.3530683538086 51.6414075056938  
55.6351010690528  
RAB11FIP1 299.890705180422 440.282299601096 273.705329906513  
225.690879436355 183.165559564289 119.088986733238 322.774093041134  
483.000434270291 315.186937216422 415.759723627205 322.229113548162  
274.493399403322  
RAB11FIP2 114.404099081799 114.617965877564 92.3034609409756  
105.234356571498 85.215646983121 207.957319374194 159.727829541783  
158.884110481815 68.75304552302 150.221698290502 171.33368481035  
183.643078064788  
RAB11FIP3 256.892326800908 280.159844300266 255.915599666591  
226.235985918654 247.676607756929 374.167501183341 201.800572658224  
201.875082892488 211.926421068313 323.095468495074 290.956194006554  
268.613247119583  
RAB11FIP4 65.5495324730507 81.909815795953 60.9621846036092  
42.357910063876 54.9249759425252 44.2607789091176 91.6978282652998  
75.2101993995344 54.2825877218965 52.0999467564713 50.1649089793069  
58.6481644777552  
RAB11FIP5 181.266908509671 119.866221751572 114.224091812993  
95.3070802596041 126.79509061532 126.128760255542 61.6544855697851  
99.3448096967314 100.638737800637 89.4747568145717 98.2581979415778  
109.241121384212  
RAB12 52.6960621424156 66.0479079234982 56.0477607422828 51.949834638817  
54.2683296643972 50.8533737532786 52.1918130336397 61.6084234634424  
53.1699994703719 63.6767189846426 57.8991270166934 60.5948704279864  
RAB13 68.8698243753339 55.5294887653184 66.5285423077808 73.3725472767369  
50.6470461863549 59.9174456081704 54.8074655158941 81.0331497830643  
49.4786466722535 65.5349012839562 64.0541263553251 85.0113628886031  
RAB14 44.6231541342 41.2598458726002 43.5710871617107 46.3203995372658  
51.2525124735102 44.6524308640784 41.253645578517 39.5466975353131  
43.6670755115848 50.0564735608363 50.1649089793069 45.9693232070002  
RAB15 52.2236479204029 60.0601788842942 106.361958225818 42.357910063876  
53.5594683028749 42.157627240486 73.0433648756396 102.626604917608  
113.367264677544 107.348865210074 82.3364971911816 78.8968326770219  
RAB17 429.65084326307 244.707381127491 118.951970882732 53.2046867327331  
122.531570028682 48.7781962164988 259.127235335036 367.56843259639  
226.580055691897 169.96123729479 188.582370265555 132.242070552057  
RAB18 80.4479092568961 65.9098543816057 68.3234331335073 75.6103053700122  
73.9456720099807 81.0880833950735 61.6544855697851 62.4219686957673  
78.6048653630165 115.414481087246 83.1874704625702 87.6598268114592  
RAB19 36.2496364442264 39.0102066700839 41.9666541498638 43.074472921841  
38.9496515344837 36.2768299545794 40.4359177791566 35.0510338774593  
35.6139301508335 34.8137085420423 40.4504608195666 35.0222940937513

|        |                  |                  |                  |                  |
|--------|------------------|------------------|------------------|------------------|
| RAB1A  | 177.535502927617 | 101.882591864061 | 132.985150338484 | 161.870972980732 |
|        | 120.618530729822 | 139.342661711134 | 91.0154871536701 | 136.552025379187 |
|        | 123.933814581281 | 133.549684980003 | 129.37368123079  | 130.293915348934 |
| RAB1B  | 84.9075858560758 | 90.1632837282491 | 102.053879707074 | 70.2541961995753 |
|        | 88.9038123445083 | 70.1074782747874 | 128.024853362102 | 71.7336217321663 |
|        | 110.074666148474 | 108.251353392321 | 122.052907748249 | 104.398842509776 |
| rab1c  | 37.1485601150873 | 37.7384958256497 | 34.8956628705329 | 35.314469458379  |
|        | 42.7107928951766 | 36.3845892764084 | 34.806104801006  | 38.3684202018524 |
|        | 38.7298222155532 | 41.9666541498638 | 35.3362091871364 | 43.0930293831497 |
| RAB20  | 93.0714382925187 | 74.9956591643367 | 65.49167373382   | 276.666571115104 |
|        | 87.8170592981737 | 68.1969125201241 | 130.648278937122 | 99.3448096967314 |
|        | 76.7100878053735 | 61.8529316708431 | 74.6847594297153 | 97.2927456872797 |
| RAB21  | 166.33117014492  | 171.360248172138 | 198.226275659825 | 298.54401957868  |
|        | 157.592292551459 | 171.302214895226 | 140.744765497063 | 140.698550434486 |
|        | 255.483653108786 | 205.510539955583 | 183.584085676174 | 245.127632785841 |
| RAB22A | 208.22938545273  | 250.41086379231  | 232.019748665806 |                  |
|        | 192.763875975315 | 195.340273658052 | 311.1022748407   | 170.150808455621 |
|        | 176.653849515825 | 252.280105035425 | 231.637751095711 | 256.071638089438 |
|        | 265.176790020229 |                  |                  |                  |
| RAB23  | 297.332750143067 | 94.6300022444815 | 127.398722392954 | 166.821616593685 |
|        | 141.319488024794 | 983.972164685474 | 137.860861723489 | 131.126942328593 |
|        | 130.865421554474 | 404.86512250958  | 434.223722811041 | 511.261925898948 |
| RAB24  | 94.9831937714438 | 75.5171857162768 | 114.935101645207 | 163.585662735512 |
|        | 83.4465817617201 | 101.693848821246 | 86.0796981361148 | 115.441414762268 |
|        | 101.46584765758  | 118.795369922438 | 113.853553531089 | 102.993620677265 |
| RAB25  | 876.959744461441 | 974.296760034984 | 2108.03351084959 | 67.1961800572759 |
|        | 775.172777866283 | 155.01005229951  | 1019.67015337432 | 532.581631305218 |
|        | 1039.06999658544 | 658.704350372292 | 682.227514643175 | 691.132727131746 |
| RAB26  | 53.8856501960117 | 49.1283590719461 | 87.6178717341967 | 62.0404348860702 |
|        | 67.4534389579576 | 49.8472708021525 | 48.0283573444179 | 43.4544762830742 |
|        | 73.3042538589134 | 64.8549209064366 | 51.3103617600342 | 55.3563533836982 |
| RAB27A | 58.7157078555305 | 53.3932110698117 | 48.4890615340603 |                  |
|        | 74.7047606031323 | 46.8674366115656 | 75.4732674021193 | 53.6575817291727 |
|        | 45.4861719648925 | 46.5589382458154 | 48.1829653238565 | 51.3861659123096 |
|        | 61.84000253727   |                  |                  |                  |
| RAB27B | 41.2424637338424 | 41.9894412416874 | 43.7630587657205 |                  |
|        | 42.6222445667107 | 39.1650142708257 | 40.1428591998404 | 43.0930293831497 |
|        | 40.9861485852278 | 45.3756389170606 | 40.4518431978241 | 43.1724740315182 |
|        | 39.1553169409075 |                  |                  |                  |
| RAB28  | 62.2150049214174 | 79.5488891958168 | 84.5998418020787 | 71.334759229964  |
|        | 68.0414563597154 | 100.802977734227 | 63.3924515518667 | 56.1106697476264 |
|        | 67.0695260207402 | 60.7495043977707 | 72.5835488194631 | 87.8967913380047 |
| RAB2A  | 153.61084474789  | 173.013258797349 | 107.637618676176 | 143.624756920887 |
|        | 111.399831013724 | 94.1128427766432 | 91.2330127140591 | 88.6368226476614 |
|        | 118.507569961357 | 66.8026147385682 | 84.4349803529132 | 98.6039579639704 |
| RAB2B  | 677.481235695517 | 463.022816882856 | 445.364320342291 | 341.535750991033 |
|        | 304.577891085373 | 529.977491403949 | 275.928723831899 | 332.659496278775 |
|        | 259.906934432819 | 621.012072500314 | 524.711981433682 | 518.936896882424 |
| RAB30  | 45.8108990837624 | 58.7111274254142 | 47.7737810047679 | 53.593974682612  |
|        | 44.7829632472754 | 54.1440452292081 | 44.7255207589606 | 73.9624143741222 |
|        | 45.9227107476843 | 44.2580151149956 | 45.390192977585  | 52.3896785600751 |
| RAB31  | 1813.65521720537 | 708.839262759372 | 835.171475474151 | 2313.21212353993 |
|        | 665.122091380755 | 1277.40606021272 | 582.782165453802 | 691.94603958547  |
|        | 435.632247999054 | 928.230419226078 | 802.036670929858 | 1120.83891847181 |

RAB32 234.232348771362 253.605641311356 231.085533860683 675.079525434102  
152.272399644814 348.123960682064 202.627009037401 179.47783529  
153.165464817911 142.095236399173 159.463273263774 326.70962514228  
RAB33A 49.540449125788 45.9266745571724 44.696023817801  
65.084620579901 63.0383605052305 52.1024135605001 50.2016912396771  
45.642304356051 43.4656637536244 52.3304586399695 41.6336636285875  
43.1805016690297  
RAB33B 45.0985088502363 50.6229884142872 41.0356368374708  
55.8709511400674 46.0977687311222 64.5187138759372 56.7780520416533  
58.3046521633424 54.5952754712007 84.8999904158793 77.5698542248061  
79.0373265781543  
RAB34 153.153205095999 238.510952165358 142.417106615034 189.890451486324  
206.514263103112 288.923207993626 276.747699321595 84.8569316561572  
260.15500351311 221.76904201992 215.399634344016 228.384073242481  
RAB35 176.02137177982 187.580695643466 151.451107406752 181.488068017883  
111.573111498905 165.662539866309 184.808179948172 108.700838142885  
179.47783529 121.806692423791 152.66454549157 133.576489624155  
RAB36 35.9305494063137 60.4646208319121 31.7645650530049 33.6816578730693  
35.2163900400329 39.6251842352088 46.4388841354122 61.9787117490846  
42.1594905198929 42.4594149893798 45.2265319826548 36.6603338274678  
RAB37 44.6231541342 46.3259167728561 42.3536549114165 55.1647896765236  
40.188873541274 53.3949676275848 43.1602899171656 43.3982712035296  
42.8372946243291 50.7404205607279 49.7069910376039 44.293922970134  
RAB38 44.2350046179299 177.494605794577 176.492987902471 105.580434427464  
180.562005428669 82.260686909201 225.389113475883 85.0308877626746  
183.918927595056 206.41879845205 131.319040057576 258.757703729905  
RAB39 39.8662795144616 42.8542642792862 36.3604951341921 39.853175885492  
40.2449343247539 39.8455060654531 44.6032218589199 41.3506832276112  
39.7537274655115 39.3698811593364 38.8507804383261 45.9693232070002  
RAB39B 39.7576136507593 36.4002279956519 40.4070046183108  
37.651298468202 41.8806343997257 37.3799542961839 34.4570158133896  
37.33030683349 40.0403898620771 38.1042454705119 39.2542963855807  
35.7451401627836  
RAB3A 38.6454098044474 37.5469247328848 37.9482157381008 40.5484717678957  
40.9950639693255 31.3901365951213 37.2892641289258 38.2782436497441  
37.1820543575123 37.8217989841918 35.6041926503637 39.4490233720848  
RAB3B 59.6008106247114 254.519518210024 68.3234331335073 40.7481155008596  
39.2608760193011 42.157627240486 54.9765783642973 35.5798430594271  
41.863927676552 44.1379638573455 49.9338905397767 45.8546719310325  
RAB3C 46.9939712192224 43.5182502375207 36.3604951341921 50.8567345921473  
40.7779767565889 48.260931742163 42.1607322031054 40.047314525032  
42.6366765186182 40.6022003765153 42.8263096141654 44.0451487108213  
RAB3D 47.8249696958403 43.7644428186265 42.7303139017786 38.5252456306656  
48.8381507187986 38.3418933808844 43.9450023643394 45.2806199505029  
43.4656637536244 52.4351670989268 43.9450023643394 41.0657892043496  
RAB3GAP1 558.65313710197 416.052744271365 609.243908604949  
450.759762047652 445.421601813221 818.290793784784 307.133157118667  
553.517839467557 430.743220222202 865.63777294494 995.397944432196  
679.810781641519  
RAB3IL1 323.002018912848 111.333692153793 106.175784900392  
313.046160403661 103.470005076276 546.80979198725 69.779139490544  
140.369714831352 69.6511571901941 244.109166881519 250.086163187797  
189.289063944393

RAB3IP 224.665128374218 827.365231733511 488.649780652311  
160.056757080676 444.544810510611 150.405742308999 597.191426276771  
263.832968124343 816.746599467159 257.851199206959 278.453446231317  
334.016152807947  
RAB40A 39.7576136507593 40.4359177791566 39.5450079747895  
39.6292788039793 42.3685136297603 37.5887129572848 37.1643693306382  
40.047314525032 43.8482802038826 49.4006068471301 37.8372168909583  
49.0655215909632  
RAB40AL 40.3478825593224 40.3384318592985 46.2625470410195  
42.8235313007746 48.2748123114598 40.3357777530419 40.4359177791566  
44.2159020605784 45.2897806651929 40.2112371512838 43.3085358214154  
40.4639532172338  
RAB40B 201.941251308732 252.313870846326 189.769786121649  
103.139459009593 244.619512279744 253.683753201667 218.19156738004  
214.369365247268 276.59189773139 484.482971152057 327.912730756303  
177.779514321673  
RAB40C 639.778130093087 1425.37639004849 1401.46625360427  
320.330057050615 1183.62228577053 484.810017115699 1035.67547271468  
308.183340806373 793.570993808328 1294.42501356365 1130.2486883492  
737.604036996153  
RAB41 38.385865183581 44.4411734611229 43.8495248991589 41.1886975241176  
42.4864576619427 39.0266821712099 40.7910160811527 38.4540849632254  
39.0775870687758 42.6793753550854 38.6662194645633 37.6557714476853  
RAB42 46.6348258763289 44.5884811528117 42.7303139017786 50.8567345921473  
46.3150221024046 45.2852528185486 40.3302268293707 51.8347877274018  
40.4997186069494 40.7063426028871 43.0016969050339 43.6753843488695  
RAB43 67.4256666294142 73.0970339739187 61.6395445916212 69.4501305462809  
78.9088042058577 59.8102324370568 70.9702772728923 65.3715655467882  
67.5417980425932 54.9631360989325 56.3106156221316 56.9379721393904  
RAB4A 71.1521292570086 150.46866649779 168.388385941598 84.2804410361247  
122.412295645862 206.312848708143 93.2133061608764 97.2750076101755  
114.039396407323 93.5511826850067 111.320157744612 151.225738885272  
RAB4B 93.4980947651211 107.785577605222 121.354667375673 155.928417606775  
92.3901719424121 81.9983163893373 115.861269747317 117.282216847547  
155.332764598031 99.9951025176909 105.406282523992 89.3228209926236  
RAB5A 123.00053659939 236.178265404264 208.529062113623 245.439289067575  
266.985013788569 205.789533350801 160.917024416961 134.185571685143  
240.139560726101 89.1516394894484 121.936597605894 203.092045210928  
RAB5B 1021.71286017481 866.712228831149 1111.89793143647 596.384327208699  
650.328627263899 1020.75813028358 883.06773454117 1676.22158135012  
1379.51119430451 1423.29307392266 1345.37091574015 1320.7894611262  
RAB5C 233.501069644324 241.24267509333 161.739131587013 341.078728185917  
203.228211195516 216.063990451376 226.672191323896 163.476051754305  
272.022473793857 163.692769575522 171.722423740869 210.605371352247  
RAB6A 78.9563955412096 80.5412889315011 82.8770530537113 78.0948272798542  
79.1039287828151 74.3729155936862 82.1892276444554 106.398825125486  
95.4162505381269 121.104663867264 88.0186381834147 114.207113458755  
RAB6B 79.6581393791238 60.2547250212462 51.9214790114499 73.3725472767369  
53.4109882045447 69.64983895075 50.3519150282938 47.7889447429963  
59.6700171760426 68.2708120569221 54.6089451252049 61.7502624458447  
RAB6C 41.1523487516364 39.8695929627783 38.5045333213784 40.9607305725196  
35.6434124419782 38.7340969861754 37.0564573649223 37.2237132058632  
40.4220196471124 43.4885245598939 38.079222289614 41.7575097298927



RAB6IP1 405.148979342648 242.899629257173 306.174148874454  
1004.28134410536 223.709679474743 827.365231733511 385.36587480414  
312.7217964763 181.844123841452 503.793770799548 454.701322158431  
536.013150313097  
RAB7A 1354.50256889331 1107.96086673001 1178.52115916913 1405.20888023653  
1483.40077183826 1338.4148149889 1232.7632290973 983.200149701633  
1135.43644148537 1749.06320703181 1428.47642890543 1485.68317899614  
RAB7B 82.1974756449763 73.0385284042351 193.981651711507 78.5141640924736  
57.8039717833131 80.3805507705979 64.7023558190673 82.0102749744973  
119.82102280033 227.206974078547 167.999042735556 71.1595608255838  
RAB7L1 124.599352191013 129.538159906075 242.503720442197  
196.513433958685 142.389246750828 156.636360703756 145.267770598988  
106.190104122745 150.009352890706 68.1674425673171 107.222176166001  
186.477689350702  
RAB8A 503.187121806288 872.305108096296 660.295993198711 768.888528247493  
842.82310025167 639.778130093087 529.650395907046 473.688869614777  
624.954583057431 595.012422454829 553.328261478032 587.88126282119  
RAB8B 147.187118389181 152.36389833079 161.870972980732 509.463928291526  
143.962643695789 260.15500351311 128.024853362102 225.690879436355  
182.188883821722 325.676668250281 274.328990210853 337.013669560645  
RAB9A 333.566613571224 311.985010273921 234.45840519702 364.439669236186  
210.38953368311 242.751164798133 323.705254926762 224.749607192071  
263.765914589758 241.792833275833 224.030034866938 327.193250073326  
RAB9B 48.4849194706125 48.5905518770847 45.4865173433646 47.9915414951747  
45.2556760873335 117.699959435983 53.0277416531043 52.1788489555942  
48.6494451061637 72.834275688835 73.7873098190297 58.3586374083245  
RAB9P1 39.6609238036815 39.2907645923217 34.8956628705329  
35.9521941716188 42.4864576619427 40.8634043028528 44.2166118829877  
36.2539950294089 35.2143190355414 39.2623423164488 39.2542963855807  
37.0953622406687  
RABAC1 740.994425128952 340.311633794489 461.607803139448  
709.730555484551 554.163106145921 628.84789420227 402.221227674218  
629.532332373083 530.314249832491 515.007705025879 777.854349637516  
483.000434270291  
RABEP1 163.62024333166 143.517244617936 127.160252453685  
208.30969642805 116.540209248478 226.553946570328 77.2154078285418  
165.640362974584 104.80882886573 213.768352764473 185.72957253374  
169.920726825854  
RABEP2 42.442231667357 45.1390218677367 50.8303921211581  
43.0016969050339 42.7107928951766 43.8582747295766 38.7337086062875  
45.642304356051 44.7058233759912 39.1621898366355 45.0985088502363  
41.1066323911308  
RABEPK 150.685575301101 190.422737436225 81.1249338842464  
108.025082988807 152.792457231813 165.606015336587 149.832238573027  
130.878055585194 102.063594231253 157.518879763075 147.719172115976  
225.875798191473  
RABGAP1 311.361885152025 342.146013966482 291.159547880488  
260.124930930243 274.02972772427 632.981507330649 445.875994521817  
233.96534264787 217.263889616995 395.634889855838 685.386956092142  
460.04552567416  
RABGAP1L 46.6348258763289 45.4882438975269 40.4070046183108  
43.5627649099623 42.3685136297603 56.4819802857598 50.2016912396771  
42.357910063876 49.9162522057712 48.4890615340603 42.911855821602  
45.1735152121056

RABGEF1 68.1413369461934 63.7721358300879 72.4913548133238  
100.483113678344 57.5685357492202 93.8630393470857 63.0119737420787  
63.763257037939 73.8374823243007 94.0140258999054 84.9051787279092  
84.3755392205436  
RABGGTA 52.3660712483179 54.3303422997961 59.4929048198583  
49.7350276169552 56.6557577134933 50.6360662655392 46.7800033479223  
50.8160430472218 52.8906306272785 45.7371044724173 46.8712941728147  
49.6629259325705  
RABGGTB 227.843903680287 181.123652339134 201.486224052899  
204.251854342995 183.820203505757 224.976641879383 161.65846687852  
200.698372627272 93.2557602398938 206.610705620712 244.560715635796  
341.818700750118  
RABIF 54.0990839134272 48.1392888470269 47.2505395290129 59.987045425047  
45.7407938943718 45.3328270847467 50.4260283682427 42.7431359850339  
52.0583273941813 47.3791873993182 50.6229884142872 43.0930293831497  
RABL2A 57.165971310746 67.7699561920327 64.8549209064366  
51.4573915545728 65.2295773603116 48.8319884367456 56.8563361917675  
59.6201808414962 54.8412943008635 55.9927099883616 57.3531401768461  
60.4358541520815  
RABL2B 95.65872032796 104.573463811298 110.219274023648  
75.6103053700122 134.307645598718 95.8905266177905 93.879589378061  
117.547659489742 75.1782851135559 127.937436596431 130.177232923004  
127.398722392954  
RABL3 75.3761360028971 78.9203273221608 93.1349769600388 89.9284109077375  
85.5362566454799 97.8052968915826 80.0733119200914 70.355653090662  
80.3805507705979 58.3813211109331 59.501103909345 92.4350913779886  
RABL4 151.175959542368 114.269266728885 162.352052340273 175.529493306927  
113.298540312696 170.128899555014 156.311985997533 284.66531382201  
172.102568448455 153.966227068697 195.968119243879 160.283895105835  
RABL5 45.5758521267508 44.1239711172417 35.6139301508335 42.6913548400127  
41.2740822675592 48.5835484742456 39.6535880152834 49.085741080241  
49.4786466722535 40.2112371512838 44.7114813656401 50.1579724208315  
RAC1 863.082385199922 880.992328229414 996.520340280883 676.672146226382  
984.650089846917 1122.44489338159 882.105892529265 503.529187388654  
1126.31998762007 860.265067346622 784.268074988084 919.542051089664  
RAC2 160.442808769594 427.363555286404 336.679355848349 1497.73669971925  
260.618790701505 436.216696884703 318.069132873489 208.553134986809  
235.682605856428 178.858202962948 205.449627031002 211.625447303889  
RAC3 108.815245119101 68.1969125201241 81.7434024567356 44.4367387274922  
91.2681347227088 52.8421046802739 189.015214517448 124.324905704041  
57.404059248727 75.9037617394486 58.0800636554122 56.9379721393904  
RACGAP1 87.3957386451235 88.1023600126139 80.877536389008  
63.3717459766798 117.3417887148 66.0069448981947 131.738693662183  
147.782301091454 141.994123068328 46.614092935749 46.1390887492649  
56.5225014032155  
RAD1 44.1737502492846 43.4667754607514 45.8445073504868 43.7410507935043  
43.5544347011646 45.5758521267508 62.0404348860702 56.0496524902806  
43.9450023643394 50.0564735608363 41.6657053704762 55.5276281380084  
RAD17 57.1046180136491 60.2165699959135 68.6772338397672 53.8732900241064  
56.9133235865341 56.3958611724694 51.0724630072723 48.0211752672327  
55.8160649599186 52.2256177934134 53.5351659420655 57.0082102559228  
RAD18 43.6706764143908 44.0409178714232 47.2505395290129 46.2462906014337  
44.6834648302383 43.4681646416585 44.0687697278114 43.1931731665131  
46.7760357462635 42.7275315121163 41.2598458726002 39.6833800000587

RAD21 101.727569033016 207.489116930705 85.271985416622 120.866081604277  
159.071016200059 145.170590045628 119.45528139824 88.4439480366515  
170.829628173552 95.2996468986128 82.9518449339163 117.052403700291  
RAD23A 315.487514440864 412.162238678684 333.122044191102  
383.642090672435 507.498146970824 414.293172794592 454.02808608679  
435.209988251425 427.066481790415 500.241231327789 478.682734715193  
451.437791473506  
RAD23B 174.860894067053 254.322611819303 108.700838142885  
162.932479392087 146.268519891864 171.877918435017 314.819739055632  
159.071016200059 213.768352764473 139.543015878846 152.329124189473  
151.111664091983  
RAD50 70.8687598033783 71.3752456831662 75.8201286658785 64.4736987797413  
81.6486527718661 88.7928773498158 56.8436081694537 69.2963913574682  
65.1424206085551 92.8280881907307 93.7977486287985 75.8701918184611  
RAD51 64.8903340853337 65.2001674269291 61.0025829061063 70.3499898024786  
67.2968280876013 64.2174369755376 80.173718023183 79.4593310742125  
80.4967881959046 74.9601612417104 76.9454624478854 77.0514384834854  
RAD51AP1 97.6205705034407 162.902264837659 95.913238814854  
76.6232527679845 188.811171804746 59.4949177415847 187.462631817772  
135.012695962236 161.573327074375 55.5206840401643 49.1067959632109  
54.1090536870282  
RAD51AP2 42.9104454767916 38.0226905622357 41.2365089689635  
39.853175885492 38.2496050953547 41.554942319225 36.5352572191451  
40.7311497914871 44.1519466943185 48.2596564318071 42.8263096141654  
40.9683275553869  
RAD51C 112.469702446962 102.220824629896 72.1154333023225  
86.1703662107384 134.19834305339 99.5844079573552 138.151998239414  
81.7500436717038 113.735641101347 68.878562323012 77.6052681514721  
106.599578931817  
RAD51L1 37.8830265336755 40.5400384479766 41.5536168238478  
43.26160898693 39.9182914210537 43.128936937037 37.762350605077  
41.0808257270221 46.1579366516298 46.3715909653832 41.7614975630362  
49.0048900199083  
RAD51L3 56.6657759377075 48.6263624298889 48.8670821164567  
42.7431359850339 59.4236178078244 51.1183745411436 63.8478970698139  
49.33855351691 54.113533179847 50.9316571524777 49.7188990489616  
52.6381586371801  
RAD52 43.2724556187214 45.4882438975269 39.5954353681031 42.6913548400127  
42.4864576619427 44.3648993568405 45.0283997415478 44.8997235283254  
40.2274522635576 42.1317134987795 40.9683275553869 43.8575940017119  
RAD54B 60.394307846869 64.3640973625938 66.4841955249254  
42.2496337895968 88.7461361855771 47.5733603903505 52.0942589368478  
49.9951674107458 55.3122077514658 60.0793579902362 60.8201366212589  
52.7847097260565  
RAD54L 76.3933911546385 50.6774883370457 44.5134109184888  
35.6928955245309 76.5375674421131 39.7394181011603 87.7107079534841  
84.0899854321388 72.5993974280876 40.7063426028871 40.3452320167286  
44.1452943804044  
RAD9A 101.211796615204 104.964345794911 163.602952119927 103.734064904898  
183.643078064788 70.1074782747874 162.160380044249 115.482982633699  
125.891602778425 99.2432911346944 101.699631771662 75.0873720488265  
RAD9B 40.7609952437622 42.2577689927563 41.528370959196 40.5484717678957  
39.9697332660833 40.9506062495231 42.7431359850339 42.0494116081998  
42.8036731479932 41.5435611403119 39.0550139257658 38.0452862258803

RAE1 162.908986027874 160.777879976503 171.877918435017 152.880772824839  
 236.374695859748 129.352472514981 250.959527806799 202.795613942391  
 224.976641879383 120.837993273922 143.042664581646 129.865093249948  
 RAET1E 41.678190413467 39.2907645923217 43.1931731665131  
 42.1273928203021 41.8441156763056 40.8634043028528 44.2166118829877  
 41.5464765641928 46.4861258030402 44.5303781239209 44.7114813656401  
 41.0657892043496  
 RAET1G 45.2421183842044 51.6060290544385 101.337735124049  
 42.2496337895968 49.8865955311391 44.8872784170036 50.2535501495675  
 46.9986083378817 73.2607982527105 74.5694657001572 56.1379957867124  
 61.7502624458447  
 RAET1L 51.7607563002005 42.7775752471711 42.157627240486  
 45.1944222548351 44.147557390293 39.6251842352088 40.4359177791566  
 42.5435283762933 37.7384958256497 44.0409178714232 40.1742127891824  
 41.1554481567603  
 RAF1 218.132527712083 350.451704069255 256.843419520398 316.419421649196  
 383.00934152588 343.418685340038 561.393215036856 437.84407370064  
 331.239629083778 244.389359320438 314.782545392841 217.617227445082  
 RAG1 40.6559419616644 37.3634897565502 36.3604951341921 37.5382094267692  
 38.6454098044474 38.3418933808844 36.634024014558 45.9604707098953  
 46.4164127487052 41.0057887014368 46.0095710163378 41.4508241771315  
 RAG1AP1 249.822387177805 269.184000351658 330.737070535671  
 209.178131628825 727.788854407888 183.887843429281 320.330057050615  
 299.188277423715 294.849830545881 121.668011907792 179.158053533144  
 182.273794635176  
 RAG2 37.0320432433314 36.3110701990588 31.7645650530049 38.9534635879195  
 38.5512429290626 39.2248354955045 41.3594868055879 37.6557714476853  
 38.3418933808844 33.7883338848419 39.2542963855807 34.9138625012006  
 RAGE 255.884444464408 109.130081850144 513.891389190131 132.863834626147  
 747.577738135496 324.877187846959 297.662970257144 215.290701336046  
 118.619819027443 232.147792636393 303.139550962377 113.624887028422  
 RAI1 158.334581991361 367.931222555457 382.425576479893 98.5663841503803  
 254.159017331462 134.307645598718 223.850148640071 152.456314990408  
 275.742101339413 235.127539195661 277.284338888467 271.529471399941  
 RAI14 849.412637017524 1067.08316477623 821.922096305069 687.862452802453  
 1097.92519921873 760.745188431719 2755.23573327276 2201.39729904166  
 1058.61208471961 725.2805190537 490.652353306749 1723.37649434054  
 RAI16 120.483677329061 54.3554233228353 77.4246856935596 47.8164193292842  
 47.9128504683618 57.6034762511847 42.0605906240248 47.2009420656854  
 53.838484549134 72.5153335566211 70.5133836963171 73.7335870746827  
 RAI2 54.4384603094793 50.2163892855092 47.7737810047679 46.614092935749  
 44.8897737954573 81.8426140611297 48.3411413510851 53.9465584609317  
 37.9273653326866 99.548445157506 92.3388129097482 64.531467526747  
 RALA 807.620534408416 605.970682363975 537.997378276053 864.302844775203  
 455.444228161475 601.139894733857 679.810781641519 541.105845300009  
 798.996494242432 557.094756796515 482.238595345574 554.551745559065  
 RALB 1154.6386362 516.704027135707 545.827286197333 1537.76265834076  
 305.279475274196 950.740991182127 456.757277476069 561.509463439533  
 487.919045801443 366.515210930763 481.492404948275 719.815240381415  
 RALBP1 189.111092737256 379.280296622892 158.702003835578  
 142.309369995384 288.642294976 183.96029495885 617.808073077341  
 524.972936438175 284.795064481553 229.130963999337 286.045253557021  
 174.51485168044

RALGDS 512.951288394692 643.9329225331 416.052744271365  
1197.13566108661 571.170643523692 355.288272452203 588.064524478384  
406.668753694984 344.578407722941 469.427640339806 317.892699374852  
358.779372054826  
RALGPS1 83.2737524877952 165.72797054597 92.9894133685392  
52.6947911480086 72.6675345946258 76.5888466260562 106.878946016737  
96.9880759408512 102.457537266105 216.821078573868 192.564048264712  
192.216758313982  
RALGPS2 57.386779375584 47.2770121962655 57.8578469574034  
49.6314545328943 38.4113893955425 42.357910063876 53.6446045619513  
51.9950964009224 54.2301964914419 65.8793101836179 53.3599118256673  
56.3324540474874  
RALY 702.737741114234 631.110081413363 578.311131274653 511.792908607692  
464.495132469257 636.701499995107 1509.04753111016 738.66912772732  
1000.65752290829 521.546082699431 561.393215036856 392.409679550956  
RALYL 37.2474303302343 34.0382693188794 31.3901365951213 38.5252456306656  
30.8824580894159 29.4322896559759 34.6720534245631 31.3302670771182  
30.6802399384205 35.0082729554459 35.1470994647364 34.806104801006  
RAMP1 73.8374823243007 46.6996902348633 38.9790184198145 94.9785931907153  
62.9553576299033 490.652353306749 42.4939802311136 71.1607965028029  
56.1733549054832 184.484466722861 188.120766710975 159.12163104195  
RAMP2 59.5752464532208 63.3357696118348 79.7170181855209 116.434267173815  
56.0477607422828 102.085154509866 48.1747307200218 70.4933405598359  
63.1091746640396 89.07557840469 81.1350396749303 60.7985356140269  
RAMP3 52.8427643366617 100.774098314706 111.465167479654 181.705809767061  
53.6907197364586 114.526825145076 45.8980298854198 65.5237529271975  
45.2392954271967 62.9604757922393 68.9745034946434 70.3309641302984  
RAN 130.058147569795 199.776860110557 141.577762652792 158.478919789334  
136.04447103201 418.927102569912 143.304938314706 87.3634135323569  
206.768099707991 104.288073521816 157.7623351008 233.710655978992  
RANBP1 516.992846073349 688.612748336336 472.982369155078  
312.19993077414 755.106456358949 587.385368995676 1117.26060212107  
501.319993127353 715.662312404643 224.373975368936 306.294404016622  
362.123479430887  
RANBP10 128.923092916744 135.007055711266 139.883681090758  
85.7983996395757 96.5030525416431 97.2865629929716 114.526825145076  
159.147713331732 111.492046718579 130.10148014895 117.993433347556  
100.289042948128  
RANBP17 50.9381343674699 42.6022652963326 39.7411455670172  
43.4410741327254 38.6454098044474 39.9397419279057 41.0381860307445  
39.1652965788406 43.1805016690297 39.6719190054379 42.2618615571566  
43.8575940017119  
RANBP2 44.2350046179299 47.5647821785529 48.0191002461099  
44.4367387274922 45.2556760873335 47.4699236780425 43.5627649099623  
50.3082459161777 50.8485682149772 49.6203214143464 46.0905079010237  
45.9693232070002  
RANBP2L1 37.8386378737561 41.4508241771315 42.9104454767916  
42.1273928203021 47.2074332636566 40.1428591998404 40.3302268293707  
44.7044140979108 47.1744296124496 39.7835513496873 43.7585538437696  
42.2577689927563  
RANBP3 100.489477730896 121.542387231625 105.308648028552  
93.9956276432715 158.17598244564 138.036631806718 135.106756607914  
118.428477744376 130.758455807465 115.314880288079 128.391264770998  
102.840494180617

RANBP3L 39.8662795144616 42.1607322031054 41.8389336728199  
43.367124590178 40.4166536885831 123.25443049561 37.7136011474903  
40.188873541274 40.3662560853635 51.2786187688564 44.2925355984056  
40.1235656101329  
RANBP6 49.3000844711116 48.0010635382918 43.8153459269057  
55.5276281380084 44.7210190486327 53.9150559426116 42.22763273471  
46.7508829977587 50.0802438185974 47.611018474151 47.9269108813022  
51.9447450229707  
RANBP9 48.5835484742456 46.8954576545929 49.1067959632109  
47.6687908290818 51.4527545197672 46.0364000143537 50.0088611244948  
40.931294690669 48.0163377492228 46.441301934328 40.723990462047  
43.0930293831497  
RANGAP1 936.39727542747 1026.51177853708 771.134853667175  
323.453481668415 871.238169066998 283.643027929014 657.59007878546  
683.099079617304 1021.71286017481 745.219025960188 622.207745395746  
529.977491403949  
RANGRF 39.4710743516517 40.3384318592985 47.3861758958576  
42.9358255168086 42.6022652963326 44.6524308640784 36.08956004634  
40.4359177791566 43.2761454096265 42.9866214102525 41.4508241771315  
40.1700117452801  
RAP1A 46.9939712192224 53.9634127270611 45.9227107476843 60.620259884953  
45.3675390992851 80.257554904218 48.5544398725959 43.4544762830742  
48.7646976789783 48.3693338695392 51.3861659123096 63.4685821260797  
RAP1B 61.8124171056747 51.6869155634183 58.6736679311765 80.4007868743886  
55.4345579421782 59.9174456081704 50.2016912396771 59.0262390168156  
61.5190597187008 65.9189023794337 57.6171094774963 71.0935990523782  
RAP1GAP 311.739149980904 1024.97546870349 204.490115029568  
43.3078542962968 321.550107822925 82.9449579428926 279.841798764418  
836.472724085903 290.371909722404 422.702925141293 415.05124917015  
212.062417120966  
RAP1GDS1 62.3470274683312 73.8251606025227 92.6036872789676  
99.0202948657926 66.6547247910487 83.1225347811557 80.173718023183  
82.2694707335812 78.7991099741789 56.8201201798712 69.3181565573028  
91.9534828522538  
RAP2A 206.768099707991 172.801059111314 165.336029381509 282.764445883135  
172.237164781821 267.565744773928 161.439879456216 164.722166245312  
166.233911320677 135.323750661937 122.688508930699 112.436153468759  
RAP2B 38.8406533304174 44.1239711172417 37.5597671487621 43.1847628331565  
43.7783560914188 47.9503724044453 44.4045701012801 38.745552403895  
48.3954967265007 50.4234835272833 46.1390887492649 47.7962548556026  
RAP2C 62.0553450433433 68.4278345554565 64.3312319756553 98.0023132593711  
69.493532577364 68.1969125201241 63.1604223919703 69.1973371867031  
67.591570323687 62.58750768974 64.9959712888709 77.1954301283261  
RAPGEF1 126.826715174564 157.830518171698 118.20465458754  
318.369837408344 109.211407890602 136.517445122438 139.566023291311  
115.954295099681 78.1683130800805 104.17651993553 100.824660338235  
102.322851896214  
RAPGEF3 50.315768338317 49.1283590719461 99.0596863442346  
77.2218991550552 56.8307116636372 93.2226507128199 41.5817737564592  
59.7744650739434 66.8632294055679 87.3815040456105 92.1646038105091  
72.0334593545916  
RAPGEF4 47.8249696958403 53.4735821194294 49.1067959632109  
41.8778873678551 41.1868052124344 47.7556758818053 38.5066108855005

47.3791873993182 47.7086093893038 50.4234835272833 53.5698357689852  
 64.1607001437806  
 RAPGEF6 128.923092916744 126.69706456173 118.752208441493  
 245.060552951511 93.7924763988692 137.976238593619 98.9988668602468  
 126.620595729562 144.799432299339 249.195312452368 175.441884261362  
 146.87603018486  
 RAPGEFL1 111.522812019895 396.63268714181 567.978225839768  
 212.64342554355 252.061166074743 66.4015820814547 91.7761668960824  
 107.148000219752 507.620619345969 368.793978305607 307.705431227338  
 215.175765091556  
 RAPH1 61.9036392303558 58.3627863274274 80.1210785681103 63.3670767194451  
 55.9644250454789 60.6628365130306 52.6654109976514 60.1796637353976  
 69.6975740412402 80.5388767883646 78.0730371064675 81.1416376689959  
 RAPSN 51.540723788287 51.9421032049606 55.5276281380084 52.403135056701  
 107.015362116555 58.1466894651854 52.6510639680705 48.8333989709933  
 54.0192060888782 47.5543691541633 49.2879849674517 52.1186591838715  
 RARA 158.918242816842 105.621640443267 92.5325708931031 168.388385941598  
 74.9113162056974 129.565589054551 94.9808934532248 90.5503099572843  
 105.796515736125 70.8485003649841 83.4172680317042 73.7335870746827  
 RARB 49.2595762436995 46.5911953202083 44.6484005362281 51.4968903591058  
 42.269054475455 60.4065050472082 45.5581356216957 47.6952179922944  
 43.3165374444543 55.1913959822834 55.6683196219708 53.4202558384095  
 RARG 42.442231667357 55.4106986624448 56.1434024065079 55.6481366056639  
 45.5809132232681 51.0506441018166 46.5650556481721 47.9942520395434  
 59.2566572428546 50.3388505346542 49.5923712603197 54.8630527326985  
 RARRES1 118.244019427757 59.4253780950488 63.4249771379563  
 163.028918580618 239.316215255944 220.621142396402 452.351360652434  
 821.013687795434 354.015808474189 89.7448801760766 99.1952492360239  
 170.999578495858  
 RARRES2 2456.86796652313 283.257142524687 91.1834104205004  
 919.542051089664 397.108901822735 1752.11152588494 223.013058725367  
 579.038638774301 79.9391673512018 609.797179957996 701.168333137671  
 300.845404774478  
 RARRES3 1111.89793143647 309.06234888929 516.076634990003  
 770.715044136717 126.79509061532 612.843402058384 361.158558609751  
 1744.56688411113 679.309039810384 396.782162132908 625.805967352327  
 284.66531382201  
 RARS 589.912813291296 295.69493803986 460.340300658834 375.354746298695  
 457.097617649604 398.229956085523 360.248832535446 680.279119780451  
 458.230500859847 430.283061862756 393.944898808828 471.046851874447  
 RARS2 206.378149389396 258.589426470951 282.328238928883 229.971492699272  
 137.424708183613 230.197573134703 168.70463124443 177.111143479957  
 158.884110481815 166.349012388957 181.2179249806 232.740032714891  
 RASA1 119.095094052197 152.250444470971 172.65049903872 159.727829541783  
 154.232642598588 127.21946569933 191.896416838806 164.312946712409  
 178.036507999889 163.585662735512 146.311363191836 170.327588764719  
 RASA2 41.8409927585705 54.8439819445945 53.7792717770978 70.0402992940342  
 50.3713170502557 52.4351670989268 51.1541843174981 52.8622615027833  
 48.0163377492228 48.2596564318071 48.8744644207821 48.6795178347248  
 RASA3 58.1027665533767 47.6914221838216 58.0218262176065 55.8709511400674  
 55.6069214673486 90.2790229242453 41.5817737564592 51.4360013601805  
 47.6195009345747 66.6332042895961 55.2374601141719 66.1650385535549

RASA4 43.6706764143908 40.0527893189096 50.9933795450314 42.6913548400127  
40.2449343247539 48.0350549043063 43.6753843488695 37.9837233601316  
37.10170285405 37.920964499903 44.8872784170036 44.6484005362281  
RASAL1 96.6833301748676 39.8695929627783 47.0055981216687  
47.8164193292842 59.8102324370568 41.7627910693483 48.0283573444179  
47.9942520395434 69.734208465775 45.4614234442527 45.1432412071268  
45.2783024981315  
RASAL2 42.8482181313226 41.0678614026819 50.1533437545239  
43.1447142498924 42.6520415016543 47.9503724044453 48.2748123114598  
42.6036491382658 42.1594905198929 38.1569957197319 42.4238335236362  
43.3276027198418  
RASD1 64.7766649630041 513.109067557976 75.2977438265751 211.596652798395  
85.4420599474339 349.589955244523 58.8993834673475 188.789206373516  
44.5303781239209 54.8979897528792 72.3822545261582 76.0240426902567  
RASD2 211.790532633462 65.9098543816057 62.9967097752591 68.9937449813561  
68.3928560299063 135.06215093641 42.1607322031054 57.3286965007828  
78.3542840447759 81.0880833950735 68.1513215633609 55.5712957590038  
RASEF 324.658458599373 174.416924448198 56.1434024065079 54.4586176399381  
43.3332476888305 40.040778349137 56.4809146784765 67.2714646016644  
147.758917745955 149.076166432567 149.933827818309 66.737740728688  
RASGEF1A 34.3473914754963 39.6123051184545 38.6005272730664  
39.1706564265495 38.9496515344837 37.3799542961839 37.6036146841933  
33.9687743313429 35.6970528713709 38.8507804383261 36.7283081422707  
40.1700117452801  
RASGEF1B 35.9305494063137 43.4396866157171 40.6737160001291  
41.7614975630362 36.7356360093603 40.7616966228404 42.629412460409  
43.1567024035183 34.3842972343227 36.9102644736882 36.0481934423077  
35.0222940937513  
RASGEF1C 41.8890826572422 37.4540772310118 42.59352468383  
42.5054997771887 40.4639532172338 41.2040352443154 40.2154497375715  
37.9837233601316 41.0381860307445 41.162473449625 45.1873487463472  
40.2250934110735  
RASGRF1 41.187562301961 42.6022652963326 42.0621425894624  
42.4580504587581 42.9090346219023 43.3785777889265 44.6809101024392  
39.8965727231863 44.619512785899 44.7958122466628 40.7725311293918  
40.4261913313642  
RASGRF2 41.5421429082231 40.6380495994768 38.1421709520616  
42.8235313007746 39.7568367479301 40.650742261428 40.7910160811527  
44.7044140979108 45.1899271235974 45.4614234442527 40.723990462047  
47.3992733452821  
RASGRP1 51.413025495745 51.0175677516029 49.4573631027613  
70.506090074243 53.5594683028749 43.2805590023412 45.6042625176633  
53.4109882045447 47.3791873993182 48.2596564318071 41.0808257270221  
45.0035308952466  
RASGRP2 46.3810615657263 57.2231446406982 52.0427912390681  
90.407200101342 43.7517118200398 83.616030092144 42.4939802311136  
48.2959356675864 40.0952076421149 57.4665857273093 51.3103617600342  
45.9693232070002  
RASGRP3 85.7983996395757 104.650071846586 90.3485862002091  
200.203393423652 64.4999048115671 60.7488007939604 50.3519150282938  
65.6914955077809 48.4869909888679 66.3956936248447 69.3645322033576  
51.6660481331154  
RASGRP4 37.3463875295726 39.6123051184545 42.640829914102  
46.5627003684843 40.0599807618105 40.5703581862752 41.8799523546812



41.467005949568 40.7520999506286 39.3113207075992 37.4642807402741  
38.2898960213646  
RASIP1 102.770627167954 408.991719312986 196.096147690942  
179.322661675979 622.964590694346 246.151211515664 285.390768830888  
115.221134337342 317.245171206724 99.8699868526053 131.942576661072  
131.645714321903  
RASL10A 45.1569741609597 53.2841144999258 51.223859150798  
43.367124590178 50.9643363406241 47.7086093893038 51.4349390827895  
64.964255000378 55.1253465069845 47.6796628154287 48.0987228351168  
44.2527566343661  
RASL10B 41.2424637338424 38.2263227947189 46.3411353377615  
45.1944222548351 48.2748123114598 40.5281496800812 41.8315602975157  
39.6474008369935 46.2027193115397 41.6373771565199 42.2618615571566  
38.1421709520616  
RASL11A 54.2648201582657 47.6229101519945 43.9450023643394  
49.1786207920603 44.8897737954573 73.2751502965172 66.6894494536346  
52.0503062610092 43.0930293831497 41.9666541498638 45.4799270968969  
67.3183506012892  
RASL11B 41.5421429082231 158.557256842416 109.758297200083  
70.2541961995753 93.1238695478498 51.1621379498014 183.2003374677  
648.885062676884 95.7194132679937 158.853244260329 128.425508339423  
58.8188963227059  
RASL12 121.613731804111 73.0385284042351 80.257554904218  
83.014860007187 81.3759380182158 347.420750861056 51.7714254834195  
83.3826639718546 44.1519466943185 290.371909722404 257.259977650678  
203.690807551768  
RASSF1 79.7882961549974 85.5625396380282 96.7948977485109  
113.783910320605 92.7836745985234 106.590506599473 91.9185612536409  
80.7067505750848 68.0501900087917 77.720889005668 73.9126724639466  
79.2525964926483  
RASSF10 49.540449125788 44.1239711172417 38.1421709520616  
41.0726336841311 40.5710637884029 38.7340969861754 36.8369172900902  
37.9837233601316 37.1820543575123 41.0057887014368 42.357910063876  
46.917149434588  
RASSF2 121.036604456449 129.820909990346 77.2413564369342  
415.05124917015 98.3322659713024 158.637047990511 174.815922224726  
249.002758392739 60.2989690950183 76.2533853403813 69.036463612998  
83.2652824564032  
RASSF3 37.1485601150873 39.8695929627783 45.989212296035  
45.8844325913247 49.452985143568 39.132725377815 38.941855825269  
42.0494116081998 45.7452456977857 37.8217989841918 44.3763859390287  
44.1452943804044  
RASSF4 61.2130609867477 54.7447380922582 66.2167164788023  
132.684895918889 54.802736966312 69.0530953932111 60.9648845690177  
55.0698932795613 43.0456011922275 58.5831897269778 51.1905212004904  
48.6037684272115  
RASSF5 82.0869179287671 155.6723334711 106.058751335133  
427.540236966999 89.8035133597498 92.9820860411485 118.619819027443  
141.649461526745 106.243765443714 115.116519358318 111.656567824564  
113.669790961194  
RASSF6 60.5191033120783 62.6984594468418 92.4781449270918  
64.0354923953233 55.2412344988347 50.5810338885769 70.5534237141767  
69.4009439491061 63.664265793911 145.509901200987 197.813848976726  
155.378768637562

RASSF7 363.947777340854 931.401929277001 1090.86617066541  
196.247893540766 613.27814206548 114.769498252688 604.357590751951  
632.019639546131 1436.67510926345 728.679189702033 752.837247653926  
735.083155673644  
RASSF8 42.442231667357 41.159706131351 43.4709415392696  
42.0102671859606 41.467005949568 42.9695585740813 43.6753843488695  
40.3357777530419 44.3440839686558 47.8207974930031 40.2649309204478  
42.357910063876  
RASSF9 39.9697332660833 40.3384318592985 43.5710871617107  
48.856176220627 41.7929491793697 44.0804700754786 37.1643693306382  
39.5466975353131 42.1594905198929 40.8049408996274 43.7585538437696  
40.9683275553869  
RAVER1 167.760135663101 239.610773859055 168.225699005719  
161.25239489071 325.363156416947 144.348025939706 210.348939191359  
163.827112371305 284.66531382201 191.926072400139 224.373975368936  
120.571680725698  
RAVER2 60.0793579902362 45.7979032939211 109.594402843796  
76.6232527679845 75.1674447943072 130.140604559757 91.6143557472674  
118.075168790221 128.327641457403 206.768099707991 138.032032026715  
155.928417606775  
RAX 40.148780650831 37.7384958256497 36.2683886571585 38.9534635879195  
44.2607789091176 41.2567470068038 42.1607322031054 40.5158867964016  
39.3750969348308 38.3092241935352 38.956280281655 37.8490162439785  
RAXL1 185.94424664238 114.526825145076 128.436305192918 230.664926508522  
94.2762661604561 131.659314490437 145.676955166566 285.12034141287  
91.8414653633828 284.351747562807 226.407063891022 154.386505379733  
RB1 70.083473392272 95.1423940686828 98.5746416750459 105.790224260281  
70.18594926052 111.939677225005 55.695361644141 59.220967994972  
85.4420599474339 48.4890615340603 54.7061116419212 76.0240426902567  
RB1CC1 212.688298502868 275.407306413402 165.336029381509  
238.120731107691 130.758455807465 292.735673136799 185.378190201718  
206.989423961124 244.466972245417 199.208033538936 191.59357986481  
277.5073518536  
RBAK 52.4179224871914 56.1355483199198 52.7005092555102 49.5424425850549  
58.4383854340181 52.0299937917925 51.7714254834195 51.0724630072723  
47.7086093893038 47.9056710878325 51.1483696410762 52.7530873093837  
RBBP4 56.227813871963 53.7652236915868 58.112348043634 74.0093517743852  
59.2643906275025 56.0121021290387 72.3515874601288 70.5322939116406  
67.0695260207402 62.9604757922393 63.0763092522598 54.9919060580109  
RBBP5 76.8998454389745 86.6411972262415 85.0946882743418 87.4850071876743  
96.0418367475772 75.5561597374812 102.00080367858 84.2434917159728  
127.49459343016 79.1074681877535 100.344513700137 102.035798846699  
RBBP6 57.764015576249 63.6287257620165 70.5208169106324 64.4895418579465  
100.305262467668 66.9499465764301 49.3032082171836 73.1262465119304  
59.7044210110693 60.4492532011622 63.5195937348531 55.5137408107256  
RBBP7 115.454858442166 94.3773551105819 105.515662220161 78.7450149191851  
107.906865732219 101.177486898065 149.076166432567 159.393207489822  
167.410607476565 96.3495443565738 99.864496342189 153.864236983777  
RBBP8 67.8335962843732 131.632115558243 90.7037473522607 80.0042268333735  
66.8733921725051 77.1317865202676 141.055218279065 87.2282539094452  
155.855834721836 92.4534854832186 114.389392280707 115.622641633992  
RBBP9 72.9154861179393 69.0663624160288 80.257554904218 66.7750249658122  
121.023370640285 102.863599315528 97.8309399470621 65.5820437889838  
63.1091746640396 106.418690759491 84.9601800557888 73.4876346170053

|        |                  |                  |                  |                  |
|--------|------------------|------------------|------------------|------------------|
| RBCK1  | 196.592478823849 | 205.314410185216 | 216.358862796367 | 154.386505379733 |
|        | 160.203825526096 | 148.871702513875 | 176.138603484209 | 178.738800467958 |
|        | 142.444971930298 | 204.039190380778 | 209.986313475002 | 172.801059111314 |
| RBED1  | 70.3757673501097 | 61.2450200533343 | 85.271985416622  | 56.9299697426319 |
|        | 55.8173045043348 | 55.401776072578  | 54.339958888486  | 74.2517888452553 |
|        | 70.4262478188233 | 87.0573871033894 | 72.4834467838798 | 58.6481644777552 |
| RBKS   | 78.0020909283414 | 54.5374188496807 | 59.6565330440648 | 53.593974682612  |
|        | 51.1368583672022 | 48.7781962164988 | 65.3694267397114 | 120.660602388292 |
|        | 50.3245489035833 | 59.2628513357357 | 57.4622430729629 | 52.8455400026194 |
| RBL1   | 44.8914371498528 | 46.5952288260503 | 45.8844325913247 | 49.260242314197  |
|        | 57.764015576249  | 46.3203995372658 | 57.4622430729629 | 43.9604529016594 |
|        | 54.8946088631931 | 52.2901521475435 | 44.0409178714232 | 46.4136802014079 |
| RBL2   | 236.727577348109 | 328.387270297393 | 515.007705025879 | 243.609178976074 |
|        | 170.184914156265 | 234.359144097839 | 250.832808506455 | 197.421622315466 |
|        | 338.966238813782 | 226.767370335792 | 280.402165030951 | 340.370474635434 |
| RBM    | 40.4639532172338 | 39.6995529770239 | 43.6670755115848 | 43.3078542962968 |
|        | 43.5544347011646 | 31.6419446793642 | 48.3411413510851 | 43.7396619462033 |
|        | 43.6670755115848 | 35.195364621675  | 43.5710871617107 | 42.2577689927563 |
| RBM10  | 295.430709655678 | 336.795797976236 | 175.056828374791 | 229.697141930047 |
|        | 310.763904671301 | 259.855509977658 | 488.649780652311 | 360.595761673073 |
|        | 359.83890067786  | 310.120875196999 | 325.769076169162 | 268.38649000825  |
| RBM11  | 41.8409927585705 | 45.3756389170606 | 39.8299340037009 | 42.4061338151892 |
|        | 41.7419877611072 | 49.9699131196797 | 44.0137388752186 | 47.7889447429963 |
|        | 44.8003345643334 | 43.1839109702714 | 42.5864346233886 | 47.0130468198828 |
| RBM12  | 125.209476374199 | 204.774090707986 | 138.151998239414 | 167.578081645481 |
|        | 187.982920458868 | 169.301010687893 | 219.555240189863 | 136.530734456168 |
|        | 201.977265056102 | 102.228965899392 | 116.253417059012 | 127.87945182399  |
| RBM12B | 55.1306642449627 | 74.621822948059  | 56.939860285007  |                  |
|        | 58.7338159410728 | 71.7263663921367 | 50.2163892855092 | 53.4921736109774 |
|        | 51.555506218204  | 49.3780606970538 | 57.0581769379589 | 61.4800543360853 |
|        | 69.6021553604792 |                  |                  |                  |
| RBM14  | 501.319993127353 | 410.402285012885 | 400.210449840662 | 448.446274966018 |
|        | 682.35345164708  | 388.831358461844 | 687.011162822211 | 615.838713743621 |
|        | 551.490493022416 | 616.265771322835 | 521.546082699431 | 578.601842980701 |
| RBM15  | 261.51893439249  | 125.027865666372 | 144.17470770145  | 253.398345052444 |
|        | 287.30565836295  | 162.932479392087 | 212.353676518748 | 324.936044300546 |
|        | 222.453547273598 | 246.924485443224 | 166.349012388957 | 161.04166688561  |
| RBM15B | 54.0170817319522 | 66.3026572113793 | 57.7415362494584 |                  |
|        | 48.1662933382789 | 62.6860949544223 | 60.4065050472082 | 64.7023558190673 |
|        | 59.220967994972  | 77.1767494799711 | 63.7836577144372 | 47.3791873993182 |
|        | 52.9609836781499 |                  |                  |                  |
| RBM16  | 100.159565926265 | 88.6663961027926 | 99.1502352565568 | 92.4781449270918 |
|        | 120.721482177994 | 88.1068080491008 | 77.9028721785469 | 91.1834104205004 |
|        | 91.2488561751625 | 83.0700092537618 | 108.246687420741 | 102.49785018292  |
| RBM17  | 328.721532812392 | 245.489660195494 | 221.743315748689 | 226.672191323896 |
|        | 453.260719561292 | 622.435313940734 | 330.737070535671 | 146.892027926888 |
|        | 327.455030020799 | 350.796638646601 | 369.032450063274 | 358.979854534484 |
| RBM18  | 123.817018264773 | 100.02732841841  | 85.5839487225537 | 136.891616331257 |
|        | 118.044483475719 | 108.961145389101 | 118.27400376579  | 94.6432868887401 |
|        | 117.138945281875 | 70.4204944097269 | 74.0420372528779 | 115.441414762268 |
| RBM19  | 44.1294459089314 | 40.1989248349075 | 47.973869237177  | 40.7941759414114 |
|        | 46.0043807840705 | 44.0423286480199 | 46.0905079010237 | 40.1474543172332 |
|        | 45.4131070782132 | 43.0290260867894 | 44.0484280023299 | 42.5379139224668 |

|        |                  |                  |                  |                  |
|--------|------------------|------------------|------------------|------------------|
| RBM20  | 41.0608773166058 | 45.3486182278177 | 49.4573631027613 | 50.8567345921473 |
|        | 40.8873907150245 | 68.1969125201241 | 41.9393838138203 | 43.0390857698452 |
|        | 47.27543600687   | 80.8593396441328 | 54.1963147679251 | 54.8630527326985 |
| RBM22  | 833.136660528149 | 573.394745674984 | 799.803676957263 | 1027.59400018637 |
|        | 634.514100741768 | 549.67905283016  | 626.749986744506 | 873.451893437179 |
|        | 804.592753722875 | 1022.76279949073 | 809.577874019028 | 853.464809072841 |
| RBM23  | 383.578947165143 | 378.964387825252 | 327.984902171255 | 387.311743342483 |
|        | 250.65667565007  | 317.245171206724 | 255.324974349269 | 172.574996256912 |
|        | 456.757277476069 | 331.474920376907 | 380.098235864256 | 337.51861578231  |
| RBM24  | 40.018129854     | 41.1212129940704 | 40.9818899755491 | 40.2455972565968 |
|        | 42.039525923161  | 50.164201758929  | 41.6466169548846 | 37.1317006162938 |
|        | 38.9006788676407 | 50.8388984085636 | 53.73245713018   | 48.3648494350286 |
| RBM25  | 250.244199415895 | 159.99819920335  | 288.552986300755 | 218.446312290024 |
|        | 283.30253361072  | 251.905799624693 | 167.872060678879 | 246.20973320244  |
|        | 234.778900405354 | 281.527450183603 | 242.932905246176 | 363.002913525646 |
| RBM26  | 72.692416146584  | 82.4362183543935 | 80.4060693489113 | 81.5135916455124 |
|        | 75.2391243965793 | 98.403191200835  | 58.0139597055449 | 58.676230030835  |
|        | 71.9771425105735 | 68.1674425673171 | 73.0970339739187 | 93.1067450332473 |
| RBM28  | 103.945335792682 | 87.8681250426295 | 76.6914642534934 | 77.0774476767901 |
|        | 131.045615546105 | 74.2690269784394 | 99.5844079573552 | 81.7765447802116 |
|        | 105.549249728506 | 76.4439037944547 | 78.9088042058577 | 80.9092480872499 |
| RBM3   | 63.6381054538448 | 64.9401081242429 | 63.7744603935682 | 55.3345906164297 |
|        | 52.6454596579693 | 51.0120959440979 | 54.422651223623  | 64.7703246910536 |
|        | 55.4030910454028 | 60.4837400912239 | 54.5374188496807 | 75.0873720488265 |
| RBM33  | 228.571334092678 | 253.267901237295 | 325.450452751375 | 244.560715635796 |
|        | 344.44626908553  | 146.634440537624 | 195.765247956108 | 179.974187861013 |
|        | 204.63343271995  | 372.02379581293  | 346.116601612353 | 263.706801812277 |
| RBM34  | 96.8783070574131 | 98.7446830481164 | 116.426770366736 | 87.9098670472958 |
|        | 97.6205705034407 | 108.39424630351  | 79.7564155881026 | 95.6731932757489 |
|        | 92.4839055864605 | 76.826527950236  | 104.313754953569 | 101.2825552085   |
| RBM35A | 63.9851732498913 | 106.160416826673 | 64.5232087947596 |                  |
|        | 40.7481155008596 | 107.427186954956 | 49.8472708021525 | 59.0457625163577 |
|        | 45.642304356051  | 63.8740412329753 | 40.8970401536578 | 48.3847843498476 |
|        | 54.1090536870282 |                  |                  |                  |
| RBM35B | 43.2724556187214 | 42.5269793679335 | 41.2365089689635 |                  |
|        | 34.2080003860523 | 45.9104478407175 | 41.6590564937735 | 45.1017494688414 |
|        | 44.2159020605784 | 43.6670755115848 | 44.2580151149956 | 43.6629145624937 |
|        | 41.0657892043496 |                  |                  |                  |
| RBM38  | 104.763913120468 | 84.8084949516218 | 74.6514558411477 | 97.7415824971555 |
|        | 95.4533981420022 | 166.317689650501 | 97.3870880869036 | 97.4421930425128 |
|        | 108.815245119101 | 92.6888475289584 | 121.593655679081 | 76.8521423078922 |
| RBM39  | 79.953657052127  | 110.061090703983 | 103.252085427319 | 158.364437886751 |
|        | 107.610858427836 | 155.693953208351 | 174.368595478868 | 117.723425661764 |
|        | 87.1471161251724 | 117.408885431274 | 117.439175394651 | 97.2124452343726 |
| RBM4   | 120.046457114882 | 150.006891243837 | 146.483908799607 | 111.910324041953 |
|        | 184.859183550225 | 126.753713093485 | 168.269510102657 | 118.899737794318 |
|        | 127.437627356956 | 77.4578596822431 | 89.6670947876322 | 107.971806573919 |
| RBM41  | 48.9906383294199 | 55.6735944873518 | 51.6660481331154 | 53.2046867327331 |
|        | 62.9967097752591 | 52.2089306840125 | 52.2476631126873 | 52.3068458655445 |
|        | 56.4685270445642 | 46.6598879466655 | 44.6286581923295 | 49.7336769474446 |
| RBM42  | 360.962191673108 | 306.94883838074  | 379.098697147575 | 364.439669236186 |
|        | 481.698684512916 | 428.958127252533 | 1023.81381775221 | 708.005870621064 |
|        | 736.626341475753 | 512.691506909762 | 597.996273468244 | 313.763121699885 |

RBM43 89.0495215957248 53.2046867327331 47.3861758958576 57.0629653735694  
44.147557390293 48.8744644207821 69.6301237585571 66.295597720304  
83.105117076029 123.704998437432 92.5135737873857 83.6255924297514  
RBM44 44.3355304829989 49.1283590719461 44.2405728317107 40.4359177791566  
46.6397391251762 40.5281496800812 49.2546642180676 54.9919060580109  
47.3791873993182 45.5776159432079 48.2910530887214 51.4308501933893  
RBM45 62.1448806673973 81.1416376689959 55.7764940944098 72.4834467838798  
78.6286416672119 70.8674195845729 76.3583555666815 79.9597944271831  
81.1416376689959 80.7338782543351 70.5133836963171 78.6705291023488  
RBM46 35.1307934330047 36.1232327599945 36.064718696392 39.5637454855233  
34.3633615460307 37.7000400506818 39.6535880152834 33.3307770183871  
36.9525112947512 41.4659679379482 37.8652234126453 37.4554876386402  
RBM4B 131.083141370546 270.89711217076 143.526781144716 115.299308625328  
382.190644764853 166.910579215196 258.079468517805 86.3237770387663  
184.048982286364 222.05036990665 201.427008153788 155.050936910986  
RBM5 556.728676214581 635.906934423716 1024.97546870349 653.089523541803  
693.056793637199 662.041552795049 596.84269596976 485.698327133705  
570.085422388476 999.862452730252 808.857027942253 722.514380928291  
RBM6 283.111920665176 174.718984988254 208.410194427484 191.668846959973  
199.442733280533 184.218705402964 211.964446599144 197.923403667051  
213.140641182603 302.79352975792 284.575587310164 297.332750143067  
RBM7 63.7818442618767 54.8439819445945 55.2141529491512 62.0404348860702  
64.9072331703985 77.1317865202676 56.6537562775715 54.5125550937898  
61.2510119532409 51.1169368198437 55.4694986901287 78.7496673195407  
RBM8A 45.1912496459517 50.0425298550559 38.6005272730664 39.3750969348308  
41.0885562160946 46.4648868771662 39.0458123429605 40.3357777530419  
49.2879849674517 42.2614524730856 45.0589947942306 39.5418280570561  
RBM9 195.205980592503 237.359267889848 190.921576470336 99.8063480813138  
186.840847924376 338.586852166449 224.509915754308 160.056757080676  
167.799243454967 180.349984862124 246.924485443224 198.522465152099  
RBMS1 134.968128884298 267.232315058148 251.299662213686 288.12763031226  
294.006023678979 255.636379050741 140.586248661832 181.950503247343  
169.557757933574 138.027432399991 142.273273748244 196.267504470029  
RBMS2 69.2322821603564 54.6089451252049 57.0427273538849 60.3481762331447  
55.0031529299037 60.5803031036931 58.8993834673475 70.0697974278875  
65.564930068976 72.3297091475814 70.7045582269595 60.4872675915085  
RBMS3 42.7542287741471 43.8163035242859 42.0164252051496 46.9851852273214  
44.4954892619459 83.4033736999037 37.2237132058632 42.7431359850339  
45.4218947614732 49.5839230147011 56.1912096308988 55.8416662428133  
RBMX 271.393858310441 408.216955625565 404.524605612471 260.383969219887  
558.215290347282 504.281506941044 303.458085392002 399.536040890627  
434.841521967958 248.599530435666 317.186419919708 390.098287325957  
RBMX2 66.7299966077909 59.897987870592 68.2372031645261 61.9976238937207  
93.5717680539357 89.7554896946341 79.9971782971285 99.6392844274488  
82.6656197609717 74.2842370505872 69.0663624160288 75.0617828888881  
RBMXL2 42.3433931248155 38.3322849790657 42.7303139017786  
42.8235313007746 43.1252272136667 45.8325181856483 36.3194282084339  
40.047314525032 39.6609238036815 42.0621425894624 42.1707022295259  
42.2577689927563  
RBMX1A1 41.1523487516364 38.1811246394237 36.0306975524309  
40.5858746708995 37.4470183315826 37.2686490268265 38.6492234339227  
38.079222289614 39.2809305246091 40.2615278292875 38.6662194645633  
40.1700117452801

RBM1A3P 42.7150227340364 39.6995529770239 41.2679739649179  
40.4359177791566 43.844855336215 40.5805725503899 42.1157692936428  
39.6995529770239 42.6762317063737 48.8058310182762 39.9070785037411  
36.1190722948669  
RBM1B 41.7397731376692 40.5400384479766 38.2280071951674  
45.7397504535169 48.3814421939888 41.4508241771315 39.6535880152834  
38.6454098044474 40.7847110517594 39.3698811593364 37.2018803984555  
43.4709415392696  
RBM1E 40.308802735799 41.9894412416874 39.779935291659  
45.3882138838137 45.3675390992851 44.2607789091176 38.8417151851134  
40.5158867964016 44.2607789091176 40.9558083259517 43.0971787292711  
41.2905987859365  
RBM1F 36.1232327599945 40.716553247236 39.4710743516517  
35.9521941716188 42.9090346219023 41.4508241771315 44.4639405506967  
46.7980335276155 44.5303781239209 41.0057887014368 45.0589947942306  
36.5474283500601  
RBM1J 40.2190458775437 38.6744044898083 40.3389624501127  
38.9990801113267 39.9225255496941 40.650742261428 45.2763025717335  
41.074824727477 40.1745944864785 41.8613406887824 39.9070785037411  
38.4919858277487  
RBM2EP 43.8582747295766 39.1982470626863 37.4302011516587  
41.6045220683604 41.0885562160946 41.4508241771315 39.6535880152834  
40.0965255448873 43.5669306063196 44.3648993568405 44.3440839686558  
42.4229201717624  
RBM2FP 39.5676051939342 43.4396866157171 43.9450023643394  
42.5664883002833 40.8873907150245 44.8872784170036 44.2166118829877  
50.7364620410977 41.3803269429468 40.4136535208406 41.2598458726002  
39.3575468494941  
RBP1 186.818097299665 172.65049903872 68.0649030501515 332.137622104526  
245.691073028699 820.580307716353 155.693953208351 343.016541928592  
90.5553202429233 442.853589679801 385.512974999198 215.033807819308  
RBP2 48.3814421939888 41.554942319225 47.646800205189 49.3654837541353  
43.1252272136667 43.0860383229288 45.3597029614942 46.7980335276155  
46.3203995372658 43.401782064778 44.1148826235374 40.1700117452801  
RBP3 34.1336988442837 36.4002279956519 39.9101908547397 40.4359177791566  
37.6527901109005 35.6125439901743 37.4772922422734 41.3506832276112  
33.6902293666089 42.785429206422 41.3553369544097 38.6454098044474  
RBP4 35.4287975493553 38.2263227947189 37.9482157381008 37.9875302985336  
39.859345745831 44.5544727111028 39.6535880152834 40.831207953647  
39.7537274655115 38.1042454705119 43.401782064778 44.3521099857368  
RBP5 46.1673159982664 45.1694246393676 60.3155766445629 42.1273928203021  
42.4864576619427 46.4648868771662 48.1747307200218 52.0503062610092  
45.9227107476843 49.1928206164702 51.3103617600342 46.3411353377615  
RBP7 59.7179445506128 46.9919960628953 55.2141529491512 73.5834042105313  
38.1644569189523 82.5956705829173 89.9284109077375 46.695848687694  
42.0621425894624 63.7836577144372 60.0765286625112 53.840976437122  
RBPJ 61.895792557253 59.6804124924694 61.2822647324366 137.438636654385  
58.3453537594243 115.519896726673 63.8294437579951 62.6048727240291  
58.3564461855595 45.6271294527191 51.0068418192677 62.9165938167938  
RBPJL 44.2350046179299 49.7363778831003 42.2577689927563 47.9915414951747  
45.9104478407175 43.8582747295766 53.1884505015411 55.1933004802607  
44.2607789091176 45.0155543555707 44.8872784170036 41.5536168238478

|        |                  |                  |                  |                  |
|--------|------------------|------------------|------------------|------------------|
| BPMS   | 86.4725057696307 | 68.6518463768502 | 75.5103237141193 | 57.165971310746  |
|        | 55.2114969675545 | 137.696331574552 | 75.4732674021193 | 64.193536444915  |
|        | 77.9978216366573 | 135.169625016001 | 117.3417887148   | 154.132233967972 |
| BPMS2  | 228.054565950253 | 96.981661155293  | 109.832638804839 |                  |
|        | 99.8063480813138 | 122.316617618658 | 2551.57660786358 | 312.859454885492 |
|        | 222.696947669812 | 100.178375869002 | 1848.50311456636 | 1640.74027400791 |
|        | 1468.75291542154 |                  |                  |                  |
| RBX1   | 540.037371261388 | 416.246271724181 | 475.310458821086 | 492.13077103258  |
|        | 378.12777235743  | 499.356036793973 | 403.546366055386 | 661.718946652592 |
|        | 746.252816568691 | 348.964065997095 | 343.016541928592 | 490.652353306749 |
| RC3H1  | 36.2496364442264 | 31.498275130159  | 36.0306975524309 | 32.7960913111995 |
|        | 34.4570158133896 | 32.4301586830653 | 34.5633623842083 | 39.3709357615493 |
|        | 34.0382693188794 | 35.93950183586   | 45.310660704531  | 37.8490162439785 |
| RC3H2  | 60.562215295948  | 67.5417980425932 | 53.0630927250439 | 74.2429851177794 |
|        | 64.9072331703985 | 90.8335894699136 | 83.0647477737971 | 56.6910078150745 |
|        | 56.0496524902806 | 49.7259371799014 | 66.8188271427672 | 73.5599394565136 |
| RCAN1  | 137.156113501125 | 79.6133633483649 | 86.3185927557402 | 162.569762535436 |
|        | 123.586057618734 | 234.232348771362 | 68.6199296680241 | 139.768680518677 |
|        | 102.993620677265 | 69.3368205576982 | 85.4790745407113 | 125.997088252817 |
| RCAN2  | 157.843337785472 | 124.890309370032 | 102.288104112092 | 119.670948133232 |
|        | 73.8251606025227 | 1005.45493369789 | 59.1774824918359 | 99.8277095030346 |
|        | 53.4604353973381 | 556.728676214581 | 665.510487460287 | 112.436153468759 |
| RCAN3  | 50.8388984085636 | 66.3026572113793 | 72.6731815563159 | 52.3004056941891 |
|        | 51.2525124735102 | 38.6414316877471 | 86.9185256838836 | 110.666686474986 |
|        | 59.9108736364178 | 48.2596564318071 | 48.2910530887214 | 45.9693232070002 |
| RCBTB1 | 56.921728372453  | 62.2150049214174 | 45.8844325913247 |                  |
|        | 55.8709511400674 | 43.004943518025  | 42.357910063876  | 49.3854238365325 |
|        | 50.0526763693329 | 60.7942162859036 | 50.7855742231932 | 45.0589947942306 |
|        | 49.6629259325705 |                  |                  |                  |
| RCBTB2 | 62.3042205863409 | 94.6935403697218 | 92.804679821289  |                  |
|        | 107.005820817545 | 65.7471714715797 | 121.120217132666 | 62.4317959077388 |
|        | 56.6910078150745 | 61.2510119532409 | 108.179513280951 | 82.2519263268941 |
|        | 101.977864642569 |                  |                  |                  |
| RCC1   | 49.085741080241  | 68.0388928513985 | 59.2778887402357 | 44.4367387274922 |
|        | 78.9088042058577 | 45.9266745571724 | 77.4046818339539 | 49.085741080241  |
|        | 61.5807110546718 | 43.7303813515864 | 43.3085358214154 | 51.3244198342335 |
| RCC2   | 2122.39240932934 | 1490.1549980903  | 1257.19844370057 | 774.8306350567   |
|        | 1689.77066894108 | 505.650842529816 | 2357.96534075689 | 2206.44541412808 |
|        | 1881.7281441986  | 1339.29022988209 | 864.302844775203 | 661.718946652592 |
| RCCD1  | 47.6153629331146 | 47.303320038958  | 48.5361215129944 | 43.4933087941017 |
|        | 61.2213001749372 | 42.2857372794461 | 44.0687697278114 | 44.5544727111028 |
|        | 45.8803291099765 | 49.4006068471301 | 54.1963147679251 | 53.9918882088235 |
| RCE1   | 129.101365145456 | 155.252915611651 | 131.973056760893 | 104.335120306753 |
|        | 192.861174667738 | 96.143327683221  | 199.660904693786 | 123.321810678947 |
|        | 148.255880793905 | 139.436084808369 | 124.041740442038 | 108.007227281411 |
| RCHY1  | 41.678190413467  | 51.6060290544385 | 47.2962360458401 | 44.0991023527481 |
|        | 43.1252272136667 | 45.0283997415478 | 41.8751578329365 | 40.5158867964016 |
|        | 47.8472928419101 | 43.0177448037924 | 43.8002456102021 | 47.5025821041537 |
| RCL1   | 75.6471706262645 | 135.997802304719 | 81.4931910857436 | 83.4756142147167 |
|        | 105.945216149549 | 81.8426140611297 | 144.593933058291 | 125.786923817078 |
|        | 101.81885073944  | 80.7338782543351 | 106.067766766889 | 97.9497090233081 |
| RCN1   | 583.053232396803 | 727.181489302632 | 537.471287449696 | 541.105845300009 |
|        | 469.78210773245  | 432.945510073269 | 1184.75786736273 | 1232.7632290973  |
|        | 658.282562295783 | 789.231011942098 | 1084.23003918768 | 855.602941621804 |

|       |                  |                  |                  |                  |
|-------|------------------|------------------|------------------|------------------|
| RCN2  | 177.65469867262  | 388.132295362791 | 171.104201731733 | 131.347995391441 |
|       | 404.440365771217 | 175.378964448101 | 298.482444614086 | 142.1823033942   |
|       | 217.721787448311 | 98.8114094374455 | 114.136234102574 | 193.806701229141 |
| RCN3  | 143.084029849218 | 60.3928833351886 | 64.1080166181228 | 133.1387411908   |
|       | 116.22441634196  | 82.8218647837178 | 42.2577689927563 | 60.1796637353976 |
|       | 56.6079099547057 | 69.1623287497421 | 56.4567728276775 | 57.8111054584154 |
| RCOR1 | 39.1590964332473 | 40.3384318592985 | 42.640829914102  | 39.6292788039793 |
|       | 36.5393857306744 | 39.6251842352088 | 33.1392460259336 | 38.956280281655  |
|       | 43.6670755115848 | 38.957687788868  | 41.7272875295469 | 36.3454320848591 |
| RCOR2 | 65.7587943905649 | 130.775349446374 | 58.0218262176065 | 51.949834638817  |
|       | 298.721050521396 | 68.0501900087917 | 125.052841200703 | 86.4898752526885 |
|       | 226.35806628102  | 46.441301934328  | 53.0798381965427 | 48.6795178347248 |
| RCOR3 | 177.173301602325 | 187.086662645246 | 273.320144423733 | 132.93879018892  |
|       | 147.704325041249 | 253.841638589385 | 163.458716079887 | 179.756604242873 |
|       | 206.814831223864 | 496.791391622565 | 395.634889855838 | 254.920345078558 |
| RCP9  | 326.121479451246 | 168.17913316957  | 205.121208974511 | 275.673080691335 |
|       | 154.869301720717 | 144.546897317106 | 241.24267509333  | 383.642090672435 |
|       | 149.856848496725 | 348.123960682064 | 341.97050042695  | 297.023913988137 |
| RCSD1 | 68.7436392042714 | 65.2966707319433 | 75.561262816077  | 130.515102593803 |
|       | 78.6286416672119 | 98.1701560122734 | 62.3556396662215 | 83.5767232665142 |
|       | 72.7934987008399 | 73.5527788467294 | 87.7844808613265 | 74.4365426051588 |
| RCVRN | 45.0985088502363 | 43.2649781354792 | 41.8751578329365 | 44.1483976313959 |
|       | 42.4864576619427 | 57.8944021095265 | 38.6243997507646 | 39.6474008369935 |
|       | 42.0621425894624 | 48.0211752672327 | 43.5710871617107 | 53.2046867327331 |
| RD3   | 41.7397731376692 | 32.0823591288671 | 35.6139301508335 | 44.9370339275041 |
|       | 31.8228237796461 | 36.9060997041453 | 34.9344532055397 | 32.6039814489621 |
|       | 35.9645119596869 | 32.7131023641972 | 33.6902293666089 | 37.7526485343328 |
| RDBP  | 167.848222139162 | 86.9032093551446 | 98.4930941487534 | 148.529482776555 |
|       | 134.051011731533 | 90.407200101342  | 162.902264837659 | 144.515737827731 |
|       | 109.492219458129 | 96.0236731791095 | 85.1114448808779 | 76.2533853403813 |
| RDH10 | 124.469290554848 | 279.001128345613 | 153.711194034581 | 131.738693662183 |
|       | 200.566335168667 | 487.749060801066 | 217.848539722853 | 202.360546931172 |
|       | 138.036631806718 | 180.930509520136 | 170.475212920685 | 365.723799716137 |
| RDH11 | 598.404003732481 | 247.074756460224 | 331.533249823589 | 309.698059657254 |
|       | 306.174148874454 | 305.554059609771 | 288.923207993626 | 555.044139654886 |
|       | 578.601842980701 | 493.513764839058 | 501.817654561915 | 429.329962597147 |
| RDH12 | 36.3649677956953 | 47.1332119496722 | 41.0356368374708 | 44.7980740332174 |
|       | 45.8051846088552 | 41.4508241771315 | 45.4799270968969 | 59.8760452220989 |
|       | 36.7267557061938 | 42.8936990772838 | 35.2339574411711 | 42.2577689927563 |
| RDH13 | 130.506891299903 | 174.905877478501 | 155.018308238778 | 82.5279746006378 |
|       | 222.985386635178 | 116.17887995398  | 178.306763765612 | 181.298709635609 |
|       | 212.250918463598 | 171.043935516593 | 161.526970033915 | 177.019082240886 |
| RDH14 | 714.532923535126 | 481.905052451245 | 371.513106715598 | 255.284866561352 |
|       | 449.701353531924 | 468.98857415608  | 507.307494640785 | 655.389317052689 |
|       | 348.757322819568 | 423.989018031638 | 368.660803187338 | 428.729935028911 |
| RDH16 | 40.5654775358427 | 38.5252456306656 | 135.323750661937 | 39.066284740632  |
|       | 51.1368583672022 | 42.4580504587581 | 42.4939802311136 | 59.3164315859919 |
|       | 53.838484549134  | 65.6721629145797 | 48.1352470945488 | 45.5800840647989 |
| RDH5  | 49.8472708021525 | 54.9392038576957 | 62.9313387640547 | 77.7973642829228 |
|       | 43.7517118200398 | 126.578693258328 | 63.928488869459  | 53.7378346199838 |
|       | 81.3858672064773 | 71.1607965028029 | 65.5386366902998 | 108.599492114105 |
| RDH8  | 48.2910530887214 | 43.8495248991589 | 41.0356368374708 | 44.9370339275041 |
|       | 43.3332476888305 | 51.6053353177789 | 50.3519150282938 | 48.272324215504  |
|       | 40.6957787921451 | 43.1839109702714 | 43.5710871617107 | 43.2776458914333 |



|        |                  |                  |                  |                  |
|--------|------------------|------------------|------------------|------------------|
| RDHE2  | 44.436995101921  | 41.159706131351  | 42.7303139017786 | 41.5464765641928 |
|        | 36.5393857306744 | 40.7616966228404 | 36.9355798143571 | 44.1311654985682 |
|        | 42.5406888281114 | 39.0648733099061 | 41.2598458726002 | 48.7814131120945 |
| RDM1   | 43.0462952354436 | 39.2542963855807 | 41.4613628725541 | 39.9697332660833 |
|        | 59.9876575158981 | 40.4359177791566 | 90.3983812495242 | 92.9747592911324 |
|        | 52.0228313532986 | 40.5571841955033 | 39.2542963855807 | 39.5418280570561 |
| RDX    | 168.492959515167 | 146.133951379664 | 375.354746298695 | 182.52420078643  |
|        | 360.43303227067  | 199.501451042641 | 62.801431502597  | 151.190816985164 |
|        | 198.360449141425 | 131.083141370546 | 178.306763765612 | 136.456679728935 |
| REC8   | 81.9258201510475 | 141.611097024526 | 94.312912693545  | 112.039388952208 |
|        | 58.9875400392427 | 66.0411740221276 | 62.9165938167938 | 66.6320017520888 |
|        | 53.5847837163876 | 62.3997407955361 | 54.9765783642973 | 58.5478485621444 |
| RECK   | 78.4590546118913 | 45.8669209716694 | 48.4890615340603 | 60.9379216295576 |
|        | 47.7508139534968 | 143.053774297331 | 40.1613888954735 | 59.220967994972  |
|        | 42.9413736814915 | 110.684033203048 | 100.02732841841  | 79.0039595317374 |
| RECQL  | 76.4637616585578 | 65.4206801651661 | 55.094385444315  | 82.5279746006378 |
|        | 64.6374507338031 | 81.5782824513693 | 68.3419511055057 | 74.5654028199926 |
|        | 62.1271781951319 | 54.1090536870282 | 52.902043370862  | 68.6518463768502 |
| RECQL4 | 108.022329297132 | 106.762097616497 | 54.9944485073259 |                  |
|        | 39.1706564265495 | 100.114114765033 | 44.1737502492846 | 112.113501370522 |
|        | 104.704892803169 | 92.1817062395346 | 33.8984830800739 | 45.1432412071268 |
|        | 40.8681871019812 |                  |                  |                  |
| RECQL5 | 59.7179445506128 | 60.6080172588224 | 63.1852348689647 |                  |
|        | 51.6974465478564 | 65.6003544901554 | 49.4157684139858 | 76.2562837208441 |
|        | 79.2314952301621 | 64.2174369755376 | 73.8949517122417 | 68.9347693115553 |
|        | 63.1944558106132 |                  |                  |                  |
| REEP1  | 56.4553747079294 | 42.0709558258414 | 43.8495248991589 | 58.3475983630509 |
|        | 43.844855336215  | 562.258108316474 | 57.2758638871082 | 88.9038123445083 |
|        | 38.7298222155532 | 231.198764780818 | 262.579533452771 | 221.972553229362 |
| REEP2  | 37.9387791625384 | 35.4484652445078 | 34.4716904283753 | 34.2080003860523 |
|        | 37.0526522140242 | 44.1737502492846 | 33.6696565339534 | 39.7509165247419 |
|        | 29.0303154053123 | 38.8507804383261 | 38.4689132737495 | 40.1700117452801 |
| REEP3  | 60.3381680822012 | 62.5528124447176 | 68.1780382173625 | 44.0451487108213 |
|        | 60.8550020364269 | 68.9562915755919 | 59.5205055437765 | 51.4360013601805 |
|        | 79.4528447794527 | 47.8207974930031 | 53.6334631215581 | 70.25295977615   |
| REEP4  | 140.961217055867 | 89.4747568145717 | 118.358996104366 | 70.8835636550472 |
|        | 83.1614238528477 | 47.0940613507321 | 85.8154958329408 | 72.8378863017531 |
|        | 110.559251404688 | 154.149426842591 | 124.512081978396 | 76.2533853403813 |
| REEP5  | 439.106576928682 | 515.856807472321 | 499.356036793973 | 533.468347491982 |
|        | 398.43592055172  | 657.031980628955 | 417.086922265732 | 388.661268904002 |
|        | 903.756866967447 | 1186.06822787922 | 1178.52115916913 | 1236.32289322872 |
| REEP6  | 213.799316520531 | 209.497482517298 | 353.942271533457 | 60.1837189855762 |
|        | 487.261132702908 | 75.0310858627394 | 279.175841990291 | 689.483531595728 |
|        | 359.296873000994 | 234.495626550751 | 286.243476131448 | 146.389547177092 |
| REG1A  | 38.2083710281545 | 39.3999056968598 | 37.7384958256497 | 43.9282059368202 |
|        | 37.2567512265363 | 43.0860383229288 | 40.0052661202207 | 39.6474008369935 |
|        | 40.3316153483289 | 44.0409178714232 | 39.4410515050885 | 39.4490233720848 |
| REG1B  | 33.9561816279577 | 40.7952353240579 | 39.0775870687758 | 45.0798408927912 |
|        | 35.7973685350741 | 36.4986986135769 | 39.1539892144371 | 39.3709357615493 |
|        | 39.0775870687758 | 42.785429206422  | 42.170702295259  | 39.1553169409075 |
| REG1P  | 36.0144420013819 | 40.716553247236  | 36.178547300352  | 36.5393857306744 |
|        | 38.3561682218911 | 34.8956628705329 | 43.3262148375525 | 39.7509165247419 |
|        | 32.396635964353  | 34.3674468322242 | 30.3383368296776 | 42.357910063876  |

|        |                  |                  |                  |                  |
|--------|------------------|------------------|------------------|------------------|
| REG3A  | 37.8386378737561 | 40.4359177791566 | 37.1643693306382 | 37.7146582037126 |
|        | 38.6213341190836 | 40.7616966228404 | 37.8877750141557 | 41.6916508480321 |
|        | 38.9496515344837 | 39.9948390976317 | 39.8184668132023 | 40.2669497398702 |
| REG3G  | 38.8336427948187 | 41.3610369241157 | 40.931294690669  | 40.0322420615846 |
|        | 39.512606833112  | 42.281606728072  | 41.1886975241176 | 38.2182800228728 |
|        | 42.992884918158  | 38.0078357808393 | 40.7725311293918 | 41.0657892043496 |
| REG4   | 39.6609238036815 | 47.5647821785529 | 39.1799070031819 | 40.8681871019812 |
|        | 41.2740822675592 | 36.8059561571675 | 35.0305278582179 | 41.2551966132486 |
|        | 37.9273653326866 | 35.195364621675  | 43.0971787292711 | 43.8575940017119 |
| REL    | 45.4799270968969 | 56.2000979702695 | 65.0656365694468 | 67.7121534934164 |
|        | 58.3564461855595 | 48.1997158668729 | 64.6446465846487 | 67.644244440455  |
|        | 55.6175144078115 | 47.0797760763156 | 51.7538628098347 | 59.4171001203919 |
| RELA   | 79.2665546280232 | 105.902612356755 | 93.5717680539357 | 120.068630086702 |
|        | 102.49785018292  | 90.1080159649841 | 130.506891299903 | 70.8749669449099 |
|        | 114.78317743597  | 65.2361525412756 | 77.8669914727921 | 88.1733775711738 |
| RELB   | 92.9323002425821 | 94.717335243904  | 87.8724689898823 | 188.533240079423 |
|        | 103.080153415433 | 91.4446109489387 | 99.5844079573552 | 90.4512650366645 |
|        | 108.815245119101 | 51.9547984751408 | 60.3431719501866 | 61.0025829061063 |
| RELL2  | 50.8388984085636 | 86.3888090084564 | 76.5699943825825 | 64.898351831341  |
|        | 99.3596089438084 | 41.0582900711341 | 38.6243997507646 | 51.2623287419357 |
|        | 52.4539007817929 | 44.7958122466628 | 43.7585538437696 | 41.2437378488025 |
| RELN   | 43.9309845324767 | 45.6948619492056 | 38.2593044488288 | 42.1273928203021 |
|        | 37.6119337673806 | 61.6702707724448 | 39.7162631015511 | 34.7569642218174 |
|        | 41.7627910693483 | 46.5650556481721 | 46.7386599624801 | 44.696023817801  |
| RELT   | 39.5185194094434 | 38.8533207843827 | 34.806104801006  | 41.3027031037343 |
|        | 39.9167409853774 | 40.5281496800812 | 39.4600924554505 | 37.6557714476853 |
|        | 41.7627910693483 | 37.6623366050401 | 38.1307780730585 | 39.2780515621926 |
| REM1   | 50.7390160399184 | 46.4861258030402 | 47.5673419710251 | 53.0284011078097 |
|        | 36.9702228618069 | 56.6172748471831 | 41.706879587091  | 43.4544762830742 |
|        | 39.2809305246091 | 42.8936990772838 | 44.3763859390287 | 43.2776458914333 |
| REM2   | 50.9381343674699 | 53.0383634135393 | 46.5650556481721 | 64.3746985855249 |
|        | 40.8873907150245 | 38.4330755397458 | 57.4047331041592 | 41.8417024632349 |
|        | 43.6670755115848 | 39.7835513496873 | 44.4688999098904 | 47.2131144508464 |
| REN    | 39.7576136507593 | 39.3999056968598 | 44.8872784170036 | 39.7411455670172 |
|        | 41.6806984441849 | 40.650742261428  | 38.7337086062875 | 55.9303347977781 |
|        | 40.3316153483289 | 42.1622837416589 | 38.745552403895  | 43.4709415392696 |
| RENBP  | 247.676607756929 | 149.213844580441 | 135.527591897994 | 670.958499409833 |
|        | 112.721024337362 | 450.271658272512 | 310.763904671301 | 561.855286945959 |
|        | 68.6379135603075 | 119.095094052197 | 126.79509061532  | 99.2432911346944 |
| REP15  | 41.9407041937973 | 45.4143854024453 | 39.1799070031819 | 43.6726153508978 |
|        | 42.7982502551634 | 42.9695585740813 | 43.6753843488695 | 43.0390857698452 |
|        | 52.9482338979681 | 47.9056710878325 | 46.6442692119997 | 51.2318935933116 |
| REPIN1 | 231.472806936915 | 227.567182783564 | 174.905877478501 |                  |
|        | 145.936763882526 | 348.964065997095 | 133.41667178516  | 178.188675055821 |
|        | 147.269661124015 | 344.133384411423 | 241.599353653369 | 192.085063824686 |
|        | 185.474249522831 |                  |                  |                  |
| REPS1  | 55.7246872330059 | 47.087835967892  | 53.2046867327331 | 54.1240583139871 |
|        | 50.2163892855092 | 48.8744644207821 | 54.1707158323527 | 47.6952179922944 |
|        | 52.6561576154021 | 58.115198353247  | 57.8111054584154 | 50.8999542937724 |
| REPS2  | 53.9634127270611 | 52.9603588177082 | 51.0539624358342 | 71.9805290614073 |
|        | 49.6641575194943 | 47.5085546268398 | 109.943883439481 | 102.899135663993 |
|        | 77.9287386697519 | 77.1767494799711 | 66.8188271427672 | 80.958999459468  |

|         |                  |                  |                  |                  |
|---------|------------------|------------------|------------------|------------------|
| RER1    | 140.677730827458 | 168.307676704652 | 166.488589768213 | 135.836577310513 |
|         | 179.522572239758 | 134.489077146096 | 234.495626550751 | 185.771041814711 |
|         | 162.540906501584 | 169.723009455614 | 157.7623351008   | 110.345465371645 |
| RERE    | 266.323732730581 | 236.374695859748 | 170.475212920685 | 158.57392852619  |
|         | 159.973746908596 | 315.960715273629 | 290.710970844525 | 317.245171206724 |
|         | 191.09175268141  | 444.169882251299 | 402.978328664331 | 270.394857925086 |
| REGG    | 55.2182004838121 | 53.9275079525238 | 55.3122077514658 | 50.2163892855092 |
|         | 42.3685136297603 | 308.025419469334 | 45.4799270968969 | 44.0390019242862 |
|         | 42.4540072551568 | 116.67447696188  | 81.4702220063796 | 92.8006484232438 |
| RESP18  | 40.148780650831  | 38.7344853699576 | 39.4710743516517 |                  |
|         | 41.6564075217517 | 39.0564222526273 | 37.7000400506818 | 40.6750540874299 |
|         | 42.4580504587581 | 38.4344387289956 | 38.3092241935352 | 44.4688999098904 |
|         | 33.0217499673686 |                  |                  |                  |
| REST    | 47.8249696958403 | 45.2556760873335 | 49.1067959632109 | 41.4273122914951 |
|         | 58.037539503209  | 45.2852528185486 | 48.3411413510851 | 51.2623287419357 |
|         | 48.0163377492228 | 39.1621898366355 | 47.0110068985119 | 45.3763275588341 |
| RET     | 45.4799270968969 | 45.1694246393676 | 39.6037514046494 | 44.604338271769  |
|         | 42.7431359850339 | 39.2679765937101 | 42.8149277408658 | 50.3452972893313 |
|         | 40.6533975461148 | 40.8970401536578 | 43.3645386728573 | 40.9683275553869 |
| RETN    | 33.3307770183871 | 37.4540772310118 | 38.0452862258803 | 93.3216420803293 |
|         | 46.3150221024046 | 44.2607789091176 | 47.2927436772465 | 34.5886782974123 |
|         | 40.6957787921451 | 40.2112371512838 | 40.6373400186325 | 36.6603338274678 |
| RETNLB  | 36.1232327599945 | 46.2286164776607 | 40.7620472083159 |                  |
|         | 39.9697332660833 | 42.7107928951766 | 35.2067831864574 | 38.941855825269  |
|         | 37.6557714476853 | 36.6312676076142 | 37.5343260962758 | 38.8507804383261 |
|         | 42.4607795638552 |                  |                  |                  |
| RETSAT  | 103.356071080819 | 87.3385669984704 | 90.5216273844682 |                  |
|         | 78.1583955490018 | 74.6833250738044 | 104.80882886573  | 69.3468840908665 |
|         | 141.830305704504 | 89.9789975503195 | 80.8593396441328 | 86.6798536307388 |
|         | 105.382126899524 |                  |                  |                  |
| REV1    | 176.594203350958 | 166.652850759559 | 204.251854342995 | 122.758873982957 |
|         | 148.198469375575 | 192.112101000423 | 145.267770598988 | 152.824869071575 |
|         | 179.581456201363 | 257.761541860837 | 249.246628143531 | 312.154320305976 |
| REV3L   | 50.6473771879221 | 62.3983214098965 | 64.3312319756553 | 81.5135916455124 |
|         | 59.8102324370568 | 103.343354834837 | 67.8919712859031 | 79.8264217848103 |
|         | 59.2566572428546 | 56.8201201798712 | 67.8570354010492 | 62.0967404944031 |
| REXO1   | 102.25509551881  | 117.239774193934 | 119.291755076832 | 96.0770202999531 |
|         | 192.95410840632  | 73.2751502965172 | 116.74427460886  | 115.995213598177 |
|         | 88.1910986077499 | 74.2379710965903 | 79.5743379965984 | 72.6182747525443 |
| REXO1L1 | 53.8856501960117 | 38.8336427948187 | 33.8558232866797 |                  |
|         | 38.2041059863839 | 43.004943518025  | 41.7627910693483 | 36.8369172900902 |
|         | 33.6816578730693 | 38.6322728994674 | 36.4651112441576 | 45.7328341667151 |
|         | 39.9519547348106 |                  |                  |                  |
| REXO2   | 869.879392791086 | 546.287195443189 | 584.724083441601 | 466.935292808402 |
|         | 706.914069768466 | 1224.80240464583 | 786.57695312967  | 716.434968700383 |
|         | 532.981045084589 | 531.36214636517  | 474.155196153863 | 1019.67015337432 |
| REXO4   | 140.853812988562 | 87.4273245333478 | 65.5820437889838 | 70.7202372217584 |
|         | 107.549325444455 | 97.2865629929716 | 154.612425659555 | 127.418173390084 |
|         | 93.2557602398938 | 132.710335836559 | 150.723391206253 | 129.336439341458 |
| RFC1    | 81.1350396749303 | 79.2525964926483 | 89.6313467455698 | 78.7450149191851 |
|         | 289.472303440614 | 145.492831993859 | 104.821285642918 | 82.5344501505114 |
|         | 118.044483475719 | 147.735538100363 | 132.205423909251 | 106.425939266957 |

|        |                  |                  |                  |                  |
|--------|------------------|------------------|------------------|------------------|
| RFC2   | 63.6767189846426 | 68.5251167137806 | 63.7744603935682 | 54.1240583139871 |
|        | 82.6983700200815 | 59.2643906275025 | 68.4380822448123 | 57.445796273665  |
|        | 84.673375308972  | 46.325232414659  | 52.7466456080101 | 62.9364422691302 |
| RFC3   | 48.0201377454632 | 62.5861902146526 | 51.8583668268401 | 44.8727287473605 |
|        | 124.965915196815 | 49.1786207920603 | 73.3042538589134 | 49.7309743973184 |
|        | 86.895648413144  | 44.8522313252892 | 46.972521499515  | 44.6946363672948 |
| RFC4   | 177.494605794577 | 118.439721088864 | 111.735319884512 | 100.100720553498 |
|        | 292.247095517604 | 111.877209777434 | 244.343381048643 | 167.16650846037  |
|        | 186.67069792963  | 71.6694991209816 | 65.6010220593397 | 101.463033319045 |
| RFC5   | 90.6805895192707 | 112.220892096054 | 83.0534943004588 | 57.5437445697293 |
|        | 119.167027972122 | 78.3488426553071 | 159.359051158123 | 99.406307365363  |
|        | 137.831070407907 | 67.1926218405833 | 72.5153335566211 | 85.2598847559951 |
| RFESD  | 46.8712941728147 | 48.6795178347248 | 57.7825648989174 | 56.1780366332082 |
|        | 44.5092684716474 | 55.1987351219665 | 49.3854238365325 | 51.3748919916683 |
|        | 51.0062122023297 | 46.7646877499666 | 54.7883681830995 | 68.4598819169598 |
| RFFL   | 63.4323398447015 | 68.9833517108866 | 59.0590113926295 | 80.5237920647059 |
|        | 69.9144520559912 | 57.2350830635912 | 68.0649030501515 | 105.965906809429 |
|        | 94.9831937714438 | 66.9549941973099 | 70.5704019848974 | 76.5758364080953 |
| RFK    | 52.3660712483179 | 46.4385386401326 | 45.4865173433646 | 47.9915414951747 |
|        | 44.0977148249302 | 50.560825686187  | 47.5963750520409 | 44.5029690493211 |
|        | 43.8106375505041 | 45.5776159432079 | 43.5258090162298 | 47.6938628797168 |
| RFNG   | 135.00141569592  | 161.910748720932 | 212.622278823808 | 103.67004664951  |
|        | 220.938982373755 | 151.831767769522 | 188.887559923238 | 127.694844372277 |
|        | 181.235112961883 | 150.396608064863 | 164.097531361519 | 136.613915120582 |
| RFP    | 83.0534943004588 | 58.1027665533767 | 96.7948977485109 | 74.7732045170597 |
|        | 115.827601697699 | 63.1091746640396 | 137.547711779867 | 139.436084808369 |
|        | 84.3526980051279 | 112.760972238512 | 77.7714622826402 | 101.017461500409 |
| RFPL1S | 34.4896350146096 | 42.5660695551615 | 44.1070537445005 |                  |
|        | 43.6726153508978 | 42.6575535390785 | 42.9104454767916 | 39.7576136507593 |
|        | 43.6753843488695 | 43.6670755115848 | 42.7275315121163 | 43.9063490244748 |
|        | 42.7275315121163 |                  |                  |                  |
| RFPL2  | 31.5599106749655 | 39.0102066700839 | 41.9666541498638 | 39.066284740632  |
|        | 38.4540849632254 | 36.4986986135769 | 37.0564573649223 | 35.4526946152955 |
|        | 35.6139301508335 | 38.4187686307607 | 40.6373400186325 | 40.8681871019812 |
| RFPL3  | 39.3709357615493 | 36.6968906669565 | 41.6079958749402 | 43.6726153508978 |
|        | 39.6535880152834 | 47.8636003588181 | 41.5817737564592 | 45.1714698794331 |
|        | 42.1594905198929 | 45.0155543555707 | 45.8180710486329 | 42.4607795638552 |
| RFPL3S | 41.9407041937973 | 42.6450179841129 | 43.8495248991589 |                  |
|        | 39.2336402665402 | 46.9058511192313 | 41.8613406887824 | 43.3262148375525 |
|        | 39.3709357615493 | 41.6340461942423 | 40.7620472083159 | 42.6366765186182 |
|        | 42.828737648529  |                  |                  |                  |
| RFPL4B | 40.4639532172338 | 39.2542963855807 | 41.528370959196  |                  |
|        | 37.4642807402741 | 40.1978874031072 | 43.5416683728269 | 41.1507980856436 |
|        | 38.079222289614  | 44.8636979668258 | 43.128936937037  | 38.9240290061433 |
|        | 31.5556621809114 |                  |                  |                  |
| RFT1   | 42.9104454767916 | 40.4359177791566 | 36.5474283500601 | 42.4580504587581 |
|        | 39.9697332660833 | 36.2768299545794 | 36.8369172900902 | 45.3872406432794 |
|        | 43.0930293831497 | 39.3698811593364 | 39.0550139257658 | 42.0424641526302 |
| RFTN1  | 300.057362423939 | 285.511923726609 | 165.336029381509 | 462.762837284748 |
|        | 251.105933757167 | 483.313014703768 | 99.9896394343368 | 278.453446231317 |
|        | 110.828108546789 | 198.652987129375 | 208.915145509698 | 163.809567262808 |
| RFTN2  | 85.7983996395757 | 53.6429962450784 | 54.5191471810265 | 90.9106103192162 |
|        | 62.3233491851723 | 110.202401893789 | 41.1507980856436 | 54.8412943008635 |
|        | 53.3932110698117 | 92.0862930476852 | 65.7587943905649 | 48.4535991392809 |

RFXD2 296.333241199193 344.887504955742 360.15483218921 292.667929804781  
343.382663050351 222.66558323175 458.861461526841 359.241360412129  
340.962490240304 377.679662622526 356.826869112433 376.141477833569  
RFXD3 183.286063142727 236.759651096748 224.249210397247 131.738693662183  
243.06561740595 108.246687420741 370.027120412227 311.149068752273  
261.826480747537 129.081183929988 129.965747812294 132.760054781304  
RFX1 130.600539398332 139.905295316081 135.90862211552 100.001150612051  
116.882934971483 99.3956523785983 110.223625398261 114.719721626067  
114.483475728117 125.588228083829 132.3192754634 96.6957892186886  
RFX2 54.5921287593554 48.4497719907777 56.3834889989413 67.474556589181  
47.4548471240051 79.5898953726467 47.5130990528612 85.5316122504411  
55.353927584599 79.0741890905715 74.7047606031323 70.6903168772326  
RFX3 44.5282181324797 45.620219291723 45.3675390992851 45.4634652319753  
45.0693869004277 41.3184305036733 43.9450023643394 47.6397712007919  
42.6762317063737 42.1317134987795 40.3104838541906 41.7575097298927  
RFX4 39.4339605251142 40.0882985541914 41.169112121892 41.9543948167375  
40.6233941280251 41.7144525110048 41.4742337714895 40.0992634142769  
39.4762546236449 41.5737994209465 43.7937218983401 42.9887069977696  
RFX5 126.171040948196 233.577690223567 179.756604242873 212.219384864571  
249.584588371496 163.585662735512 167.47269732721 240.58403560014  
194.189674572424 147.165235402905 141.977447082092 111.760213205992  
RFX6 41.6354649482853 44.7829632472754 44.4311655729487 44.4367387274922  
44.4489662507893 46.0364000143537 44.7255207589606 47.2009420656854  
45.1899271235974 50.0564735608363 46.3370338074996 46.3411353377615  
RFXANK 116.852483297949 147.34358398245 164.511418506192  
144.546897317106 300.703401968169 134.407474121421 172.599587851881  
119.572497267498 184.50283792606 143.653706909456 133.823107212467  
125.768826615813  
RFXAP 49.7827734675743 54.8439819445945 52.2132783757422 52.1201052574162  
65.9900865113645 66.7768390362438 79.8331445290301 52.3068458655445  
46.3563690926644 48.2596564318071 50.5381435455868 50.8736372975089  
RFXDC1 41.2424637338424 41.4508241771315 43.0971787292711  
54.8412943008635 38.3561682218911 44.2607789091176 50.5252048155459  
38.3684202018524 44.1519466943185 47.4767851750188 43.7585538437696  
41.4508241771315  
RFXDC2 50.1533437545239 48.1627097465883 40.0998167098057  
49.7350276169552 55.0031529299037 47.6803619768589 52.561573697155  
47.2009420656854 58.9870089759222 61.9882398986333 46.6442692119997  
53.7442594289333  
Rg9mtd1 39.7576136507593 44.8529259387308 49.8344973836834  
40.3180310664156 42.6022652963326 40.8634043028528 40.4359177791566  
46.5717043290731 46.0106098064475 38.4187686307607 42.2618615571566  
41.5536168238478  
RG9MTD1 61.8529316708431 76.1682394916873 66.8632294055679  
91.7068354379889 101.867388894697 76.5888466260562 100.289042948128  
80.3860547572521 77.2413564369342 73.3479915711031 68.9745034946434  
71.501028931626  
RG9MTD2 37.6397652536077 49.9085372049438 48.0191002461099  
61.5515639412892 50.5110359971301 47.5733603903505 56.6537562775715  
52.5909491535773 57.4777075615651 49.7259371799014 51.9302027391447  
51.4968903591058  
RG9MTD3 49.8472708021525 50.8114699212931 50.0748292497578  
60.4646208319121 54.802736966312 53.8461734834857 60.2399886747451

|       |                  |                  |                  |                  |
|-------|------------------|------------------|------------------|------------------|
|       | 47.3791873993182 | 49.2879849674517 | 54.1683282066029 | 61.4800543360853 |
|       | 57.5372732453319 |                  |                  |                  |
| RGAG1 | 38.7537364570873 | 41.7337506166619 | 42.9104454767916 | 35.9521941716188 |
|       | 41.1868052124344 | 38.2293008890613 | 41.706879587091  | 48.5681478665796 |
|       | 37.5469247328848 | 38.6454098044474 | 41.6336636285875 | 42.6758568421347 |
| RGAG4 | 41.5421429082231 | 45.6533175604486 | 44.1452943804044 | 40.6892234267786 |
|       | 45.5809132232681 | 44.0399598874356 | 41.8751578329365 | 41.3506832276112 |
|       | 42.4784375889044 | 42.5193208629123 | 45.310660704531  | 45.4218947614732 |
| RGL1  | 321.359569119182 | 160.134344197725 | 493.705301673753 | 667.710357746751 |
|       | 213.285274542564 | 784.60990326608  | 103.619396986593 | 178.249889756228 |
|       | 100.696072546592 | 612.441960343995 | 563.065549077627 | 372.758184542037 |
| RGL2  | 162.124919858334 | 128.005663945917 | 133.163926420863 | 99.5958921252583 |
|       | 96.5030525416431 | 88.9738853594498 | 90.8691042645133 | 109.738537924214 |
|       | 94.9104200955155 | 154.811704749343 | 116.11290802164  | 97.822911929574  |
| RGL3  | 46.263826584899  | 41.6466169548846 | 38.1421709520616 | 31.9427626516788 |
|       | 32.2133093774284 | 38.4330755397458 | 39.3585350448719 | 39.6474008369935 |
|       | 30.8360322325222 | 40.2112371512838 | 49.7363778831003 | 47.8931773060789 |
| RGL4  | 51.0225132036905 | 54.113533179847  | 46.9040704638073 | 152.792457231813 |
|       | 47.2074332636566 | 53.0290605707162 | 104.932630862885 | 50.628152951493  |
|       | 46.4861258030402 | 47.2299678280724 | 54.7061116419212 | 49.5539622682049 |
| RGMA  | 74.6134978387686 | 69.3525901554637 | 54.2670850492947 | 94.080489738662  |
|       | 121.023370640285 | 332.137622104526 | 68.4380822448123 | 67.8061298261394 |
|       | 71.9771425105735 | 98.8595497262968 | 113.994256868581 | 123.022511916727 |
| RGMB  | 64.8549209064366 | 50.543526404059  | 46.2625470410195 | 45.134793898089  |
|       | 53.6907197364586 | 44.5973052166071 | 51.371775055873  | 53.9060479865677 |
|       | 52.9482338979681 | 71.9124897002253 | 65.3933030211114 | 55.916393897815  |
| RGN   | 40.9141850646578 | 41.4123755032424 | 42.02667925031   | 44.2238927021522 |
|       | 46.4343327861696 | 60.5803031036931 | 48.9826868640753 | 44.293922970134  |
|       | 38.3867490877227 | 46.6025757239946 | 50.7502704822135 | 48.8201213065674 |
| RGNEF | 44.5732978059923 | 61.1452879517526 | 56.8214341981301 | 42.1273928203021 |
|       | 47.3172462673426 | 44.0804700754786 | 49.6872467499977 | 47.841175678417  |
|       | 59.4714233251027 | 50.9316571524777 | 52.3458026450704 | 49.0655215909632 |
| RGP1  | 37.0320432433314 | 37.1685072112618 | 39.7411455670172 | 45.4634652319753 |
|       | 43.6587492470348 | 43.6670755115848 | 52.4111687156893 | 50.9933795450314 |
|       | 41.4636047919453 | 45.9004543328976 | 48.3847843498476 | 48.4535991392809 |
| RGPD1 | 58.637422084759  | 43.5873188565519 | 43.2721716572958 | 68.4261608261522 |
|       | 44.0977148249302 | 40.2945586900975 | 43.9450023643394 | 58.9081750508316 |
|       | 42.5864346233886 | 45.0155543555707 | 44.9713479185144 | 39.6833800000587 |
| RGPD2 | 43.6706764143908 | 40.2493681589104 | 42.5406888281114 | 44.550322123994  |
|       | 52.4370718282084 | 49.1013967533186 | 38.4005795891396 | 49.085741080241  |
|       | 41.5635499110307 | 42.0621425894624 | 42.4580504587581 | 41.863927676552  |
| RGPD4 | 41.678190413467  | 42.6022652963326 | 42.2837084302963 | 45.8102081251786 |
|       | 41.5377280911418 | 43.7078399718247 | 39.5496902678788 | 44.7520317855773 |
|       | 41.074824727477  | 48.7414853386615 | 41.9495387255163 | 41.1868052124344 |
| RGPD5 | 41.5647772234975 | 39.1476421976219 | 39.3275194442012 | 38.0410971749125 |
|       | 40.1921696368154 | 39.063743761302  | 39.7576136507593 | 43.375692472202  |
|       | 38.8517967960128 | 38.6880635921304 | 40.5889674764864 | 39.9519547348106 |
| RGPD7 | 38.957687788868  | 42.1607322031054 | 38.6005272730664 | 35.9521941716188 |
|       | 38.3561682218911 | 32.2133093774284 | 44.3440839686558 | 41.6466169548846 |
|       | 38.4344387289956 | 35.7202909649682 | 43.3085358214154 | 34.9138625012006 |
| RGR   | 45.4799270968969 | 48.0296332183129 | 44.3648993568405 | 41.1507980856436 |
|       | 47.2074332636566 | 46.1513019317765 | 45.8311458106942 | 51.1293275125104 |
|       | 47.3791873993182 | 46.0713306971594 | 42.8742421276144 | 42.6758568421347 |

|       |                  |                  |                  |                  |
|-------|------------------|------------------|------------------|------------------|
| RGS1  | 412.072103136251 | 510.82619253142  | 387.631477822638 | 1214.73798692268 |
|       | 188.670053901101 | 558.65313710197  | 359.185856400148 | 569.511773053233 |
|       | 62.4776210012906 | 274.259417498569 | 243.609178976074 | 120.149188463323 |
| RGS10 | 121.851515410237 | 102.348306329887 | 88.0777258947198 | 284.105466865264 |
|       | 107.211374033204 | 225.420624458188 | 203.979798245524 | 123.350559552455 |
|       | 82.6157566292355 | 102.952512767439 | 89.1382266158262 | 79.508103983962  |
| RGS11 | 58.3285450269055 | 46.5650556481721 | 42.4580504587581 | 42.6913548400127 |
|       | 49.1263312877155 | 62.801431502597  | 40.2601451506332 | 60.1796637353976 |
|       | 48.6171311968573 | 46.7646877499666 | 78.0020909283414 | 52.8974363028468 |
| RGS12 | 55.9669688396835 | 121.104663867264 | 120.705229050133 | 80.3204519680998 |
|       | 78.3082773071531 | 58.9121419521018 | 78.562924024292  | 64.6748464612845 |
|       | 113.655306804539 | 133.127645982507 | 118.341308125578 | 110.422857502267 |
| RGS13 | 49.3463416794995 | 43.2109153553335 | 45.5883690965192 | 49.3654837541353 |
|       | 46.0977687311222 | 58.0910843932181 | 41.3094485574845 | 45.4882438975269 |
|       | 45.4799270968969 | 44.4652605017595 | 44.057571056322  | 44.0246886382298 |
| RGS14 | 59.0463859571117 | 51.8610060995363 | 52.9111155236961 | 56.2508140932179 |
|       | 58.2780916793348 | 50.7516773099639 | 58.5087296620514 | 53.9465584609317 |
|       | 68.5599263000733 | 49.8393069675192 | 53.0177144132449 | 55.3563533836982 |
| RGS16 | 342.475405815033 | 114.269266728885 | 238.205365476671 | 93.4853597306163 |
|       | 90.5359675350156 | 277.993522959259 | 255.946758662074 | 170.593589984253 |
|       | 118.155986485411 | 65.0928075335306 | 55.7868713984479 | 60.8662233098324 |
| RGS17 | 182.885934774318 | 93.9708162269401 | 43.3085358214154 | 69.3525901554637 |
|       | 60.8550020364269 | 56.0477607422828 | 49.6872467499977 | 107.576033955049 |
|       | 47.4699236780425 | 103.264100180823 | 79.0940380276977 | 81.3082994649699 |
| RGS18 | 44.2350046179299 | 52.9603588177082 | 60.1874689914535 | 292.389429869034 |
|       | 59.6922302604696 | 79.4053001255904 | 76.7483302168542 | 58.9081750508316 |
|       | 48.3119523820103 | 45.4614234442527 | 48.2050207071554 | 45.9693232070002 |
| RGS19 | 165.29964739949  | 205.898127436939 | 185.72957253374  | 503.529187388654 |
|       | 193.380035526465 | 152.426698798326 | 155.099281008688 | 128.219615202232 |
|       | 164.529367656711 | 87.1434190022564 | 84.8084949516218 | 88.6771566133367 |
| RGS2  | 1125.31394383117 | 638.848775860866 | 279.063292799015 | 3391.65926812276 |
|       | 220.010492114456 | 3282.4852236415  | 860.265067346622 | 1370.76188322111 |
|       | 103.934830132715 | 2331.12401106076 | 1093.84714207969 | 464.671881584567 |
| RGS20 | 48.1125722136997 | 39.3622375852537 | 38.0057289062111 | 43.0016969050339 |
|       | 41.467005949568  | 40.4359177791566 | 41.0871827071116 | 52.2416165827554 |
|       | 38.9496515344837 | 37.0320432433314 | 39.0061493066838 | 36.72060634973   |
| RGS22 | 39.1590964332473 | 39.5050383901884 | 41.2365089689635 | 44.9370339275041 |
|       | 42.6022652963326 | 51.8103411703261 | 40.5585676679482 | 42.9301944191913 |
|       | 44.2607789091176 | 55.6865353018811 | 44.9713479185144 | 42.7782216342806 |
| RGS3  | 42.8482181313226 | 41.4508241771315 | 41.7350767817144 | 40.0124413244394 |
|       | 41.0476065156912 | 41.6178506967511 | 41.4742337714895 | 36.8982253308785 |
|       | 43.3262148375525 | 37.9661004970253 | 41.0441816173391 | 42.0778399888414 |
| RGS4  | 495.453743436613 | 51.6060290544385 | 39.991353369336  | 85.3754356809649 |
|       | 52.0583273941813 | 100.423344358771 | 48.1747307200218 | 64.2174369755376 |
|       | 47.27543600687   | 44.2580151149956 | 67.9599395822006 | 47.6040671292013 |
| RGS5  | 99.7807691901691 | 170.501116810593 | 196.561401686392 | 126.14245679817  |
|       | 94.4129246851651 | 675.079525434102 | 44.2733573199954 | 125.013317684129 |
|       | 71.2409890549638 | 260.279110870904 | 364.141443387516 | 138.070735985503 |
| RGS6  | 45.9090659324223 | 43.0227387991135 | 45.8844325913247 | 46.3203995372658 |
|       | 44.9936360641969 | 43.5752393599169 | 41.8315602975157 | 46.0633179231318 |
|       | 42.7150227340364 | 50.8826620053386 | 45.9104478407175 | 41.3481355128089 |
| RGS7  | 34.6977013306396 | 48.2220547806679 | 38.1421709520616 | 42.0102671859606 |
|       | 39.6535880152834 | 37.3799542961839 | 37.9430145836712 | 35.0510338774593 |
|       | 38.9834959368496 | 38.528621456378  | 43.4709415392696 | 38.1421709520616 |

RGS7BP 41.9407041937973 43.4396866157171 43.1931731665131  
44.4367387274922 37.956732373465 53.8461734834857 44.6032218589199  
39.6474008369935 41.6616444147804 43.844855336215 41.7272875295469  
45.9693232070002  
RGS8 33.5994525227062 41.3610369241157 38.6005272730664 38.2041059863839  
39.7568367479301 37.7000400506818 40.4359177791566 43.7396619462033  
35.7973685350741 41.0057887014368 36.6298807161755 42.57175366709  
RGS9 36.6062356000449 45.9266745571724 37.9003288112261 41.6564075217517  
39.3999056968598 40.5805725503899 37.2892641289258 36.2951478373477  
37.5723609429239 39.8455060654531 41.3553369544097 38.2350720635382  
RGS9BP 45.0985088502363 42.7775752471711 39.2707964550441  
47.481302504066 40.5710637884029 54.8265655909623 42.7431359850339  
46.1673159982664 42.7150227340364 49.3000844711116 46.6442692119997  
44.8372404608604  
RGS11 32.9174234020987 37.5469247328848 38.6005272730664 37.5382094267692  
38.2496050953547 40.7616966228404 41.8315602975157 41.9315419791594  
38.5252456306656 37.7315666632629 36.7283081422707 38.4330755397458  
RGS12 41.8409927585705 42.1607322031054 42.5406888281114 51.0175677516029  
44.6834648302383 41.8613406887824 42.8684958525042 42.7431359850339  
45.3756389170606 44.571915452417 41.9083581529276 42.9887069977696  
RHAG 35.2267149016596 36.9994058279362 39.1799070031819 37.7469621225553  
33.9142669203111 43.2805590023412 44.7255207589606 38.2782436497441  
41.863927676552 39.7835513496873 40.547835538778 40.7704587752083  
RHBDD1 77.2643026985097 114.526825145076 163.946447772618  
123.493308132159 124.295423292168 126.753713093485 104.250582652805  
89.680151549258 144.162413121166 147.115466503902 159.949298350852  
149.295715963625  
RHBDD2 1114.15989325456 699.488969175268 384.919835924792  
788.232434009173 475.008345432596 537.841677481011 636.367246129079  
1076.05074395483 1019.67015337432 1159.77262479002 1102.03940742413  
472.982369155078  
RHBDD3 81.0295607064541 68.921126710047 66.737740728688  
54.2886483704949 50.7615314686244 48.7781962164988 63.5738862549306  
66.6320017520888 96.6294773538052 62.8201270538435 63.0763092522598  
59.6757573886627  
RHBDF1 604.357590751951 920.023344692409 1139.81870068001  
236.851068206869 515.216890329893 346.844545554188 241.706783147271  
204.862161704394 479.318513108472 524.451156145427 568.371815312895  
382.190644764853  
RHBDF2 125.137803364368 105.945216149549 193.290018569713  
277.12373983597 199.123340814127 91.4446109489387 109.979856686854  
107.513442725922 176.816741656659 75.4392126686957 90.407200101342  
84.0305689846475  
RHBDL1 47.8249696958403 64.408176016319 98.6706537801886  
40.5484717678957 63.25187762908 40.9506062495231 49.8281348927244  
41.7419877611072 60.164635768614 55.0016608333828 50.9815930710768  
68.3234331335073  
RHBDL2 194.502731496189 134.713725350463 163.718576695806  
128.937837181433 105.05842887748 77.0703146713865 184.536327776767  
286.927016665685 322.678762360476 248.924819383887 217.065944053174  
199.007437365676  
RHBDL3 40.148780650831 42.9358255168086 44.2405728317107  
36.890925044696 52.6922486991742 51.294537308199 45.4799270968969



|         |                  |                  |                  |                  |
|---------|------------------|------------------|------------------|------------------|
|         | 43.5544347011646 | 43.2761454096265 | 45.1569741609597 | 50.6473771879221 |
|         | 45.3763275588341 |                  |                  |                  |
| RHBG    | 45.0985088502363 | 54.2924642952939 | 47.4740726032707 | 33.6816578730693 |
|         | 42.269054475455  | 42.2577689927563 | 40.0052661202207 | 75.656434170689  |
|         | 55.7522234735038 | 47.9056710878325 | 47.2134341420411 | 48.8670821164567 |
| RHCE    | 43.632365631458  | 40.3946758935842 | 41.6977706798234 | 40.4967168818294 |
|         | 40.4639532172338 | 40.8970401536578 | 38.237657348649  | 42.6913548400127 |
|         | 42.5864346233886 | 44.2580151149956 | 42.7775752471711 | 41.1868052124344 |
| RHCG    | 42.1537476443423 | 35.0222940937513 | 38.0452862258803 | 35.9521941716188 |
|         | 36.4434672195785 | 43.0860383229288 | 46.1634822993009 | 75.2101993995344 |
|         | 40.8970401536578 | 46.1390887492649 | 36.7283081422707 | 41.863927676552  |
| RHD     | 39.3709357615493 | 42.0709558258414 | 42.0621425894624 | 42.8235313007746 |
|         | 36.4434672195785 | 39.3841861812262 | 42.4939802311136 | 39.0620487644635 |
|         | 37.1820543575123 | 41.3321861371202 | 42.5426057453993 | 37.9607839934735 |
| RHEB    | 481.145001682177 | 625.805967352327 | 461.394007153992 | 547.729200972776 |
|         | 748.913487947791 | 856.790359133679 | 694.590958116425 | 364.534123862511 |
|         | 889.638287212686 | 344.512332068969 | 529.210992541911 | 923.470702344816 |
| RHEBL1  | 39.8662795144616 | 47.8400694856726 | 41.0356368374708 |                  |
|         | 36.9912468186322 | 41.3755760434934 | 44.7804080899431 | 40.5585676679482 |
|         | 38.956280281655  | 46.581796165231  | 42.5664883002833 | 45.1432412071268 |
|         | 37.5556299264699 |                  |                  |                  |
| RHO     | 42.3433931248155 | 34.9262464079777 | 45.8844325913247 | 38.2041059863839 |
|         | 43.3332476888305 | 36.0306975524309 | 44.2166118829877 | 41.4508241771315 |
|         | 42.4540072551568 | 45.4614234442527 | 41.3553369544097 | 39.5418280570561 |
| RHOA    | 979.468753716758 | 1294.42501356365 | 1211.8832855325  | 1480.95754707554 |
|         | 1005.45493369789 | 1621.89443989657 | 1189.22631004243 | 922.047328788961 |
|         | 1195.24078948059 | 1317.29255644089 | 1031.4414268329  | 1521.20630233299 |
| RHOB    | 114.288115730578 | 263.21493129287  | 207.943044411392 | 185.677720870442 |
|         | 142.273273748244 | 525.917089808641 | 283.747865829282 | 400.327164003217 |
|         | 82.0081006332668 | 225.53019299714  | 198.360449141425 | 299.665413950641 |
| RHOBTB1 | 40.7084119829585 | 43.9783383422823 | 40.9868109608686 |                  |
|         | 41.9620007529243 | 39.8264418617139 | 38.2971553419489 | 39.6080759138364 |
|         | 36.4952603984796 | 47.5810366106247 | 40.6022003765153 | 40.040778349137  |
|         | 40.2669497398702 |                  |                  |                  |
| RHOBTB2 | 65.2001674269291 | 55.6323803479191 | 73.6323065529916 |                  |
|         | 43.8002456102021 | 47.4548471240051 | 54.2503023961401 | 44.2166118829877 |
|         | 47.2009420656854 | 51.5229124652769 | 64.8549209064366 | 68.878562323012  |
|         | 72.5346469941833 |                  |                  |                  |
| RHOBTB3 | 347.829279462722 | 406.964801954621 | 971.856840043688 |                  |
|         | 359.889643461047 | 517.216393517181 | 570.204236909398 | 262.779883562966 |
|         | 361.023743912857 | 268.047342640491 | 489.622327794168 | 501.148339791372 |
|         | 590.709061039001 |                  |                  |                  |
| RHOC    | 751.150916058018 | 295.061449024268 | 457.860665614779 | 452.797096652556 |
|         | 395.457351443921 | 748.372940917543 | 366.915943380617 | 519.775555680262 |
|         | 738.059797123491 | 509.463928291526 | 543.640122689871 | 637.565156571985 |
| RHOD    | 164.047379890821 | 112.375316615894 | 117.355761277966 | 100.344513700137 |
|         | 154.111066539468 | 108.961145389101 | 185.924923239764 | 280.968337220318 |
|         | 270.922452389109 | 157.121355906194 | 138.23147386089  | 117.626009607247 |
| RHOF    | 51.413025495745  | 45.7317208802318 | 47.2055133646385 | 51.0175677516029 |
|         | 49.5666074434383 | 46.263826584899  | 43.9450023643394 | 33.7818132446042 |
|         | 42.0621425894624 | 37.920964499903  | 39.3667161654772 | 42.0424641526302 |
| RHOG    | 415.364456363434 | 381.533380474563 | 377.409970666607 | 1070.52156560795 |
|         | 280.075938355178 | 347.829279462722 | 323.374628445744 | 243.15571937138  |
|         | 280.680953068339 | 268.613247119583 | 284.437758089699 | 266.702252514277 |

|         |                  |                  |                  |                  |
|---------|------------------|------------------|------------------|------------------|
| RHOH    | 34.8099089553046 | 40.3384318592985 | 34.5718473203083 | 49.1786207920603 |
|         | 35.7973685350741 | 39.2248354955045 | 41.8315602975157 | 42.4580504587581 |
|         | 33.0463640202858 | 36.3612409063792 | 37.1059647239814 | 38.5279745308203 |
| RHOJ    | 67.9065649240898 | 55.6735944873518 | 82.4900927793125 | 105.790224260281 |
|         | 59.135659721231  | 162.049698241573 | 40.7376840028647 | 60.847641921163  |
|         | 42.5406888281114 | 81.3895045947915 | 74.8071157013401 | 62.3997407955361 |
| RHOQ    | 292.47671022688  | 637.694633519528 | 523.679443405512 | 1319.32406112346 |
|         | 256.995917821765 | 1130.2486883492  | 418.410951118141 | 1077.94530110976 |
|         | 186.67069792963  | 559.9670724278   | 615.442484911026 | 759.94822128584  |
| RHOT1   | 113.351710503778 | 118.32905874786  | 117.948047796034 | 136.998739859195 |
|         | 123.455270940015 | 145.391705645319 | 122.514153407264 | 91.7227477250701 |
|         | 139.814194128548 | 104.886608171525 | 109.326279686847 | 118.428477744376 |
| RHOT2   | 163.20801480093  | 335.818251279914 | 504.281506941044 | 203.353724675525 |
|         | 245.489660195494 | 141.043326064913 | 201.360008430353 | 127.213248611204 |
|         | 244.678323059428 | 386.640440174303 | 363.602775933416 | 214.691909801388 |
| RHOV    | 43.9309845324767 | 48.6447083765118 | 46.7508829977587 | 39.5050383901884 |
|         | 53.0419743379342 | 38.5252456306656 | 49.6872467499977 | 50.7364620410977 |
|         | 47.1744296124496 | 48.6124127998952 | 48.6767028205398 | 38.6454098044474 |
| RHOXF1  | 42.8036731479932 | 32.8881500803623 | 43.401782064778  |                  |
|         | 43.6726153508978 | 43.7517118200398 | 45.9266745571724 | 53.4921736109774 |
|         | 40.831207953647  | 47.3791873993182 | 39.9948390976317 | 41.7272875295469 |
|         | 39.6352613956998 |                  |                  |                  |
| RHOXF2B | 40.7609952437622 | 39.8695929627783 | 39.1799070031819 |                  |
|         | 42.357910063876  | 41.9842695818285 | 41.7256940298128 | 41.253645578517  |
|         | 42.6022652963326 | 43.6039443285137 | 40.2615278292875 | 40.723990462047  |
|         | 42.6758568421347 |                  |                  |                  |
| RHPN1   | 73.2842501003097 | 58.0218262176065 | 64.1777305915695 | 43.6726153508978 |
|         | 67.222434502867  | 40.4359177791566 | 49.540449125788  | 58.4200819624972 |
|         | 54.2825877218965 | 64.7269156363245 | 65.8220821345163 | 50.379587451669  |
| RHPN2   | 862.031722874406 | 167.49597550111  | 155.174579191838 | 83.5895816521251 |
|         | 199.732059204509 | 69.9819944829311 | 945.065986430527 | 888.56944380788  |
|         | 527.686970237622 | 242.751164798133 | 282.646286144563 | 286.611037700479 |
| RIBC1   | 42.5534565507139 | 42.3550738181144 | 45.3974838013476 | 44.6131679221578 |
|         | 40.5303289242683 | 37.33030683349   | 40.0603121770344 | 42.6022652963326 |
|         | 41.9635525160083 | 39.1832968442811 | 37.1059647239814 | 37.3600014814388 |
| RIBC2   | 37.8386378737561 | 34.6306468196142 | 39.7411455670172 | 36.1562979552173 |
|         | 43.004943518025  | 37.7000400506818 | 44.3440839686558 | 38.6454098044474 |
|         | 41.074824727477  | 35.0668743708816 | 40.4504608195666 | 36.8690774823319 |
| RIC3    | 41.6354649482853 | 37.920964499903  | 38.2280071951674 | 38.9534635879195 |
|         | 38.1644569189523 | 59.8102324370568 | 44.4639405506967 | 41.4508241771315 |
|         | 39.4762546236449 | 87.3815040456105 | 67.495246759946  | 75.3271272345679 |
| RIC8A   | 247.298165265093 | 428.307428028806 | 392.008276951929 | 237.039707901886 |
|         | 378.358853591082 | 342.058245939495 | 256.766675299448 | 198.54718783437  |
|         | 358.083401917765 | 294.567137562864 | 280.622184239624 | 307.264133974364 |
| RIC8B   | 40.3478825593224 | 40.4359177791566 | 36.769073068743  | 48.309866878365  |
|         | 40.3452320167286 | 45.1873487463472 | 29.4322896559759 | 38.079222289614  |
|         | 46.3203995372658 | 44.571915452417  | 47.6884372645373 | 53.3904307221902 |
| RICS    | 452.797096652556 | 567.675954219815 | 324.041885677148 | 70.8835636550472 |
|         | 284.105466865264 | 119.14126712577  | 327.024556075244 | 442.99540222483  |
|         | 368.162822151919 | 241.677456498713 | 258.212981181513 | 288.284384035759 |
| RICTOR  | 36.5393857306744 | 43.1805016690297 | 36.5474283500601 |                  |
|         | 39.5050383901884 | 43.7517118200398 | 48.260931742163  | 37.7136011474903 |
|         | 45.3872406432794 | 35.860430241131  | 32.406093465115  | 44.553780984244  |
|         | 38.9496515344837 |                  |                  |                  |

|        |                  |                  |                  |                  |
|--------|------------------|------------------|------------------|------------------|
| RIF1   | 61.982079862943  | 62.843734579668  | 57.8715555065641 | 58.8224410806741 |
|        | 73.8251606025227 | 73.4820932957859 | 77.7615826856723 | 69.9214859673839 |
|        | 66.7008819035152 | 54.3554233228353 | 57.2008272301399 | 68.2309359831273 |
| RIG    | 39.4710743516517 | 40.6380495994768 | 39.7411455670172 | 40.4359177791566 |
|        | 40.0599807618105 | 35.5158505219112 | 37.4772922422734 | 44.797320243931  |
|        | 36.0741672064298 | 37.8217989841918 | 39.4410515050885 | 39.5418280570561 |
| RILP   | 59.8248482438562 | 55.4106986624448 | 56.4779645313958 | 78.0020909283414 |
|        | 57.5685357492202 | 63.3612993417558 | 53.1884505015411 | 51.0724630072723 |
|        | 50.2223403889892 | 60.399253022569  | 54.2999306485758 | 61.9882398986333 |
| RILPL1 | 126.528654651607 | 96.8240908274121 | 150.925721934159 |                  |
|        | 81.5135916455124 | 178.156332261759 | 183.243195292141 | 105.382126899524 |
|        | 109.137372445043 | 119.82102280033  | 168.145003400654 | 143.693373312575 |
|        | 152.612579631539 |                  |                  |                  |
| RILPL2 | 88.6663961027926 | 98.3240331951021 | 131.413578749264 |                  |
|        | 886.397061577531 | 97.0055689383756 | 131.57403028894  | 166.009268520425 |
|        | 93.0474674148534 | 108.42710653018  | 101.759714275976 | 108.649424858333 |
|        | 148.043320937247 |                  |                  |                  |
| RIMBP2 | 42.9104454767916 | 38.0226905622357 | 44.7829632472754 |                  |
|        | 44.9370339275041 | 47.3172462673426 | 43.6670755115848 | 38.6243997507646 |
|        | 45.4757965005055 | 32.8704945047196 | 44.3648993568405 | 45.7328341667151 |
|        | 42.4607795638552 |                  |                  |                  |
| RIMS1  | 37.2474303302343 | 47.6914221838216 | 41.1367478979484 | 42.5664883002833 |
|        | 38.8456942580061 | 42.357910063876  | 39.4600924554505 | 43.6434576713809 |
|        | 40.2274522635576 | 38.957687788868  | 37.0180934800573 | 40.3691324547049 |
| RIMS2  | 39.0620487644635 | 33.5924201549249 | 35.3649449469275 | 41.7614975630362 |
|        | 37.4470183315826 | 41.8613406887824 | 33.2425023465738 | 31.7063377004409 |
|        | 42.4540072551568 | 57.5713378330876 | 58.8188963227059 | 66.2305843819029 |
| RIMS3  | 78.9028182143923 | 51.3800036046133 | 54.9071823326024 | 57.6511495792664 |
|        | 47.4548471240051 | 105.814959179397 | 53.0277416531043 | 78.4815128101967 |
|        | 43.4656637536244 | 82.8275497073451 | 69.3645322033576 | 63.9371474698484 |
| RIMS4  | 47.5647821785529 | 48.109747794187  | 35.7105247506212 | 41.5464765641928 |
|        | 43.3332476888305 | 47.4699236780425 | 43.1931731665131 | 53.9465584609317 |
|        | 43.7630587657205 | 40.2112371512838 | 47.5439485437351 | 41.863927676552  |
| RIN1   | 51.8781065691038 | 53.3683962805281 | 49.4573631027613 | 58.0218262176065 |
|        | 61.8471691369569 | 47.8636003588181 | 46.8613212048981 | 55.421880601441  |
|        | 55.7522234735038 | 60.8730416435467 | 57.2008272301399 | 59.5875857071693 |
| RIN2   | 296.333241199193 | 131.537639104397 | 182.80711310964  | 278.562093102424 |
|        | 240.975885654236 | 205.876395674271 | 188.408367998553 | 121.84142967836  |
|        | 142.34144664795  | 355.568857981155 | 208.189151365575 | 323.095468495074 |
| RIN3   | 50.315768338317  | 45.5842286511645 | 53.0630927250439 | 89.2503940049313 |
|        | 57.1935729219207 | 51.6053353177789 | 38.6243997507646 | 53.5271601314404 |
|        | 42.9020321355927 | 48.2596564318071 | 53.3078448066074 | 47.2131144508464 |
| RING1  | 852.769974690777 | 638.305455110267 | 622.699896083816 | 442.99540222483  |
|        | 787.671342652389 | 634.514100741768 | 538.572110053093 | 373.399443929227 |
|        | 619.337575854369 | 842.82310025167  | 824.946988188872 | 570.204236909398 |
| RINL   | 42.9104454767916 | 62.5528124447176 | 85.271985416622  | 92.999328769924  |
|        | 91.0327980861321 | 78.3488426553071 | 56.4809146784765 | 102.818879165949 |
|        | 42.4540072551568 | 71.5032996449402 | 80.3500323413132 | 58.3586374083245 |
| RINT1  | 66.6547247910487 | 76.5411379733694 | 80.943990104641  | 70.506090074243  |
|        | 90.0157406552551 | 82.3364971911816 | 59.8273072817267 | 76.3509533017572 |
|        | 76.1019439127881 | 67.6169355376864 | 59.8070012006708 | 76.1453055441256 |
| RIOK1  | 122.136867360309 | 76.3824005526731 | 65.326134385614  | 75.2475238554276 |
|        | 125.997088252817 | 96.5851811404251 | 69.9984754033658 | 60.9009676344258 |
|        | 83.6395145977203 | 75.5561597374812 | 83.2822233807881 | 71.8539743926881 |

|         |                  |                  |                  |                  |
|---------|------------------|------------------|------------------|------------------|
| RIOK2   | 131.380698046552 | 103.707931766117 | 141.154520472188 | 147.961677716225 |
|         | 132.946528291039 | 172.929453277107 | 86.6798536307388 | 137.081911344143 |
|         | 141.370796803908 | 108.905276555106 | 103.349712762251 | 152.72007888133  |
| RIOK3   | 146.117756310709 | 291.232601825013 | 265.320447667174 | 205.24499293304  |
|         | 155.464685445566 | 163.643603259911 | 108.558977253184 | 112.428734515811 |
|         | 212.803471204964 | 142.957149812186 | 148.608392563633 | 230.142262693206 |
| RIPK1   | 277.796753761378 | 194.278792348966 | 198.729330487352 | 161.48562926756  |
|         | 218.245471601353 | 177.602690452814 | 149.832238573027 | 132.117013391364 |
|         | 275.407306413402 | 229.621795088195 | 226.023657887826 | 158.613823276652 |
| RIPK2   | 351.039814818516 | 403.664724682094 | 234.495626550751 | 994.404707955031 |
|         | 531.69595054137  | 223.801865347687 | 394.437597863822 | 263.21493129287  |
|         | 323.515041493836 | 125.393232344778 | 124.599352191013 | 178.98901256658  |
| RIPK3   | 68.9745034946434 | 94.284665243755  | 76.5699943825825 | 79.4528447794527 |
|         | 66.8733921725051 | 62.0660509811111 | 68.0157730844432 | 75.7947206223934 |
|         | 55.8510296341925 | 95.8075612515186 | 74.1425714439424 | 75.2431285480772 |
| RIPK4   | 66.7759319948677 | 97.5849495690144 | 170.829628173552 | 49.5424425850549 |
|         | 140.199798713912 | 59.1570467228834 | 134.713725350463 | 90.1430468048409 |
|         | 200.790001763897 | 122.23209417744  | 126.546330358591 | 97.0589984189239 |
| RIPK5   | 47.881892094074  | 72.1401612718245 | 115.840734064724 | 69.6097529955737 |
|         | 91.1057573288203 | 128.776189744323 | 88.4695322145032 | 89.0275988550016 |
|         | 102.648943280704 | 134.394743648475 | 113.051477801522 | 104.141384807311 |
| RIT1    | 98.4084364053686 | 63.3667304749164 | 91.1834104205004 | 134.099684731177 |
|         | 65.3933030211114 | 57.2767879969284 | 69.779139490544  | 51.9447450229707 |
|         | 91.6978282652998 | 53.4109882045447 | 72.4834467838798 | 99.5125674355716 |
| RIT2    | 33.8558232866797 | 36.6002100641539 | 37.0642268327439 | 41.6564075217517 |
|         | 36.3390947880186 | 38.5252456306656 | 39.8695929627783 | 41.3506832276112 |
|         | 39.853866204927  | 33.9967481174035 | 38.956280281655  | 34.0382693188794 |
| RKHD1   | 36.5393857306744 | 41.9894412416874 | 37.3687900733549 | 40.4359177791566 |
|         | 41.1868052124344 | 36.0306975524309 | 39.8695929627783 | 35.3608605269276 |
|         | 39.1790517315259 | 40.8970401536578 | 43.6629145624937 | 39.9519547348106 |
| RLBP1   | 38.2083710281545 | 42.6939394537076 | 45.4865173433646 | 40.0698728584484 |
|         | 41.5668884168669 | 41.159706131351  | 49.540449125788  | 42.6450179841129 |
|         | 39.853866204927  | 47.3791873993182 | 44.6286581923295 | 43.8575940017119 |
| RLBP1L1 | 33.9561816279577 | 33.8237407699472 | 38.1421709520616 |                  |
|         | 39.9697332660833 | 39.0564222526273 | 38.8336427948187 | 39.6535880152834 |
|         | 39.3709357615493 | 40.137818555383  | 42.0621425894624 | 37.7384958256497 |
|         | 45.6692241948108 |                  |                  |                  |
| RLBP1L2 | 40.4639532172338 | 38.5252456306656 | 42.3536549114165 |                  |
|         | 45.1944222548351 | 42.0709558258414 | 38.6414316877471 | 42.1607322031054 |
|         | 40.3357777530419 | 45.9227107476843 | 40.4136535208406 | 41.4508241771315 |
|         | 40.4639532172338 |                  |                  |                  |
| RLF     | 82.7662395247601 | 46.4385386401326 | 51.9885249508283 | 77.7973642829228 |
|         | 56.2305155589239 | 50.2163892855092 | 50.2016912396771 | 51.555506218204  |
|         | 83.3710785008781 | 62.2025996860055 | 53.3078448066074 | 63.2113624676341 |
| RLN1    | 36.0144420013819 | 40.3384318592985 | 38.7745734037492 | 44.6905691366696 |
|         | 45.2556760873335 | 42.8598805316863 | 41.0381860307445 | 36.9355798143571 |
|         | 37.3600014814388 | 43.0919221375514 | 40.8225507267584 | 42.0424641526302 |
| RLN2    | 41.0043775553254 | 41.2598458726002 | 40.6312687664188 | 42.0621425894624 |
|         | 40.5710637884029 | 38.3000131612011 | 45.0283997415478 | 43.5752393599169 |
|         | 45.1569741609597 | 36.6396388746561 | 38.5252456306656 | 37.2810767789306 |
| RLN3    | 42.0532901689036 | 44.3529919625344 | 39.2707964550441 | 42.357910063876  |
|         | 44.5668141895992 | 42.157627240486  | 44.2166118829877 | 38.956280281655  |
|         | 42.0621425894624 | 42.6793753550854 | 38.4689132737495 | 37.8490162439785 |

RLTPR 43.0001432913058 49.3581578587582 44.7829632472754 54.8412943008635  
48.0234896130991 37.9003288112261 87.2351169088172 46.1673159982664  
35.4332080966594 40.5090849993014 38.956280281655 40.3691324547049  
RMI1 80.2335594838879 76.2258667419953 61.8924196882984 75.4466520363487  
83.5767232665142 55.1037284831588 139.328628553223 95.750422489231  
87.2437977005922 66.8544766980562 67.3136079922956 70.8835636550472  
RMND1 67.1387898740161 87.5666652975503 84.2385359528743 66.4047895961325  
79.7808217577226 88.8760662992208 91.0154871536701 60.419911425109  
61.7865043876727 72.7502212566295 85.2598847559951 90.8140983242733  
RMND5A 47.9175508887533 50.8812920005251 43.0016969050339  
47.9915414951747 46.0977687311222 44.9896851005259 50.6774883370457  
60.419911425109 62.6386437936516 48.8623729374733 52.022479439889  
48.9733758107788  
RMND5B 100.289042948128 66.5141009463313 93.1349769600388  
70.0402992940342 79.9161139112432 92.9820860411485 79.4832790698673  
130.792245267896 136.451598654243 129.810477623628 138.568626520133  
83.7019398654324  
RN7SK 76.7820250461545 68.5725871332774 80.1077267656485 222.05036990665  
114.537682317715 94.1128427766432 114.437872597779 98.3864497097481  
128.281765653795 191.730944258418 222.202580186782 93.5928272702304  
RN7SL1 14226.3743910711 9852.7965902602 11176.402230735  
9938.5091387622 9582.11974031559 6938.87250165681 15358.8899487375  
15358.8899487375 8827.37298329149 13656.2581082905 13656.2581082905  
11176.402230735  
RNASE1 500.168833003599 194.502731496189 268.38649000825  
385.675278463448 84.0996028277101 1132.19026676901 176.653849515825  
122.368552598681 59.1223319112238 148.871702513875 129.810477623628  
264.071486075874  
RNASE10 42.6036491382658 49.9085372049438 51.4308501933893  
51.5913529948887 48.6224651100733 52.2089306840125 60.7992483126292  
54.2877981508636 51.4413099192899 52.0999467564713 46.8954576545929  
48.3648494350286  
RNASE11 33.4902421268456 37.920964499903 38.5045333213784  
42.2496337895968 33.3231576795423 41.0582900711341 37.0564573649223  
44.4031868028216 45.2897806651929 41.4397539024976 34.8383995317036  
41.7575097298927  
RNASE12 39.9697332660833 46.0023068797812 41.9666541498638  
42.357910063876 43.004943518025 38.2293008890613 43.1931731665131  
42.157627240486 37.10170285405 42.3606390470387 40.8225507267584  
29.9775071862804  
RNASE13 35.0202257459026 38.0226905622357 39.6451483836089  
43.6726153508978 40.0599807618105 36.2768299545794 38.7337086062875  
41.8417024632349 41.1742244762318 37.2089297656361 43.1931731665131  
42.4607795638552  
RNASE2 51.1055541075029 48.9259041798949 44.0451487108213  
112.368910939752 50.8875036861067 49.3172204533818 63.3924515518667  
42.7431359850339 41.5635499110307 41.2276963324981 42.911855821602  
57.6075177910677  
RNASE3 42.9104454767916 42.9358255168086 37.3687900733549  
39.066284740632 37.8679241954337 41.3553369544097 43.8206425661746  
37.1317006162938 34.5633623842083 42.0621425894624 41.1638563416981  
37.4554876386402  
RNASE4 135.782043043499 58.4695701019439 50.7855742231932  
124.078147850905 54.802736966312 394.764369100963 72.9752827496503

90.99086730704 49.9951674107458 217.065944053174 179.694413858411  
207.18510695093  
RNASE6 91.8733417805775 66.8693882433359 80.1665291227124  
390.906200053021 59.1948983423381 82.3364971911816 55.9276266345493  
55.8087097725119 43.7630587657205 52.5522545249206 47.3791873993182  
56.2804354745795  
RNASE7 37.1485601150873 41.8073910693411 50.2869791217819  
54.8412943008635 44.5668141895992 39.9397419279057 48.1747307200218  
44.2159020605784 36.2733735494625 39.3698811593364 45.1432412071268  
38.8495095797881  
RNASE8 42.8036731479932 42.3550738181144 37.5597671487621  
37.5382094267692 44.9936360641969 40.8634043028528 52.4111687156893  
38.6454098044474 41.3803269429468 40.3235655331796 34.6366195121669  
40.7704587752083  
RNASE9 36.4564050256915 33.6902293666089 34.9849896310235  
36.0481934423077 33.4316681623175 39.8455060654531 35.3362091871364  
37.9837233601316 34.5633623842083 37.6383530120621 33.4071187618571  
34.9138625012006  
RNASEH1 306.115856873599 234.727123301682 247.905335219826  
167.273775508231 323.855522995794 393.464673405634 147.321968565095  
221.71759246183 157.334378544568 199.776860110557 298.670959394883  
218.999184133546  
RNASEH2A 81.7500436717038 102.304422999511 86.1563473462864  
83.014860007187 223.1171195512 68.839885767937 190.465025329717  
184.377148097206 125.777874890962 72.42732668079 58.6464918752765  
70.4262478188233  
RNASEH2B 55.8218917166321 61.7572675712557 56.6888826857797  
66.5921967967793 49.1928206164702 65.3096524773304 84.260633540656  
61.016921238986 57.678188678075 47.1001757441025 56.9320717885002  
57.445796273665  
RNASEH2C 44.6231541342 47.5647821785529 45.2313723727673  
42.8235313007746 48.8381507187986 47.8636003588181 43.0930293831497  
45.5581356216957 43.3744503319109 52.6879797806876 45.390192977585  
46.5650556481721  
RNASEL 107.325456368022 132.799542377892 155.332764598031  
134.258351436533 70.9638091288679 113.287380238064 88.8039637390786  
81.7765447802116 118.316810638061 145.050655626219 136.883475451494  
135.106756607914  
RNASEN 104.657817552182 85.9392883641626 84.5998418020787  
71.193768715137 92.6036872789676 82.4362183543935 167.724518368713  
187.767803297395 123.022511916727 92.6888475289584 85.2598847559951  
86.2118355769367  
RNASET2 1398.21942794938 1615.83220398811 1539.35554229258  
3166.48568397766 821.013687795434 1252.94510628089 3124.84336032646  
940.781370938596 560.802447943839 1204.34388579291 1050.05355467301  
1280.77934331703  
RND1 59.5000730792772 57.9509155144056 49.8344973836834 59.987045425047  
46.4343327861696 110.757899996422 68.1125016199524 134.185571685143  
48.6494451061637 50.1649089793069 51.4413099192899 46.0633179231318  
RND2 55.5276281380084 47.9665737016961 51.223859150798 49.1786207920603  
66.4047895961325 107.034189847828 79.5707751325986 62.5528124447176  
84.4938528830721 81.2992152187529 81.6472320169489 60.0940570991178

RND3 464.209794165593 472.522115719366 166.734730009916 256.258779434769  
363.324816966828 653.880422442079 189.915336406793 370.150839052727  
172.698530496379 143.278668481091 194.355765743782 286.243476131448  
RNF10 100.765131355505 122.203872796773 91.2769094348604 104.99788782377  
68.7911855725594 123.768417863139 121.945468001236 96.4971762611189  
148.016994658777 147.579873410455 130.35828139117 116.9812483023  
RNF103 395.457351443921 356.826869112433 320.966569449558  
385.827237353675 187.888403806895 392.796524588309 216.102691704365  
379.79657860938 295.69493803986 350.451704069255 374.167501183341  
271.813877560354  
RNF11 66.0303950772736 77.0244607682203 80.0183739952818 67.7121534934164  
62.8270556619309 78.9521593412581 61.2183034191703 62.9922928277769  
69.4383198054368 54.691568065544 58.0969258817391 72.5346469941833  
RNF111 39.1590964332473 41.159706131351 42.640829914102  
41.5464765641928 41.6806984441849 54.7083331985678 38.2933870238743  
38.079222289614 56.2441895183416 50.3388505346542 56.233217375698  
54.4313108506244  
RNF112 42.3433931248155 45.2556760873335 50.0050760710506  
50.378948785456 49.32293280121 56.4819802857598 51.9421032049606  
49.9332280449549 45.5779686360641 45.0155543555707 80.8366627364071  
53.655233033193  
RNF113A 88.3799086910448 87.5666652975503 75.651446553407  
116.434267173815 100.489477730896 70.6691645786819 110.729504563799  
148.906660152784 105.036862798568 117.746495007818 95.0604882262201  
102.322851896214  
RNF113B 46.263826584899 43.5182502375207 43.3085358214154  
38.8495095797881 43.3332476888305 43.2805590023412 43.5627649099623  
48.3590401011623 46.4164127487052 40.8049408996274 40.3452320167286  
41.863927676552  
RNF12 38.1644569189523 39.6123051184545 37.9946685306274 39.5748670524951  
41.3755760434934 39.8873706855774 40.9647597231175 39.9927637255545  
41.3413300001245 36.634024014558 38.6662194645633 40.22509341110735  
RNF121 231.637751095711 116.839274984089 125.52123746909  
135.836577310513 125.588228083829 149.397632479523 167.410607476565  
234.232348771362 198.682422442825 229.379918828848 219.527698657901  
151.451107406752  
RNF122 50.7390160399184 40.716553247236 39.2707964550441  
47.3574589211166 35.3327761997046 45.7300501624017 41.1507980856436  
37.0390589468421 42.357910063876 37.4302011516587 42.8263096141654  
44.2527566343661  
RNF123 66.5500089527674 107.836867810972 136.456679728935  
89.0203733091224 146.117756310709 91.8295472317386 90.4957279507369  
84.0899854321388 105.969617813287 88.2056147099779 88.0877175295544  
90.4957279507369  
RNF125 46.3390850717989 55.0009147092272 48.1997158668729  
60.9379216295576 50.8875036861067 79.953657052127 66.5422130374814  
58.0892402609917 64.7116910405493 43.6033221838149 56.3884556031093  
63.5693267269002  
RNF126 81.4621222177298 192.318724749487 161.109600577001  
97.0813208326187 256.843419520398 105.743957034577 156.65747550889  
127.741016067967 146.551751666276 100.597578643877 113.759627906335  
99.5125674355716  
RNF126P1 49.2595762436995 55.3122077514658 56.607199625498  
122.170704886985 50.9794293959929 48.4758590019384 48.4178121471765

50.8160430472218 50.4662238169527 49.5635427311883 47.9942520395434  
48.3913169169846  
RNF128 45.4799270968969 115.63300104804 102.380096190518  
43.5627649099623 72.828269171954 47.5733603903505 80.7227211275429  
91.2742382717815 96.6969760559963 60.0899457747036 69.9652162720742  
89.1217605204013  
RNF13 83.6524523974491 97.5249420794698 95.4533981420022 338.164006403  
86.6854406823303 122.599723509633 96.2280884890067 65.3019328668633  
107.087870999702 93.6212502203405 95.9075629352341 114.623641209561  
RNF130 211.926421068313 103.289476128549 98.4136818894883  
606.276674926567 133.151333210366 382.872356030213 161.573327074375  
165.322633260592 151.575914903116 175.114727506747 157.356512456687  
140.853812988562  
RNF133 41.4508241771315 40.5400384479766 44.696023817801  
41.7614975630362 41.467005949568 44.4619248757502 38.0598374201407  
37.0390589468421 40.0403898620771 41.4397539024976 45.310660704531  
38.8495095797881  
RNF135 102.926945888985 79.5838979704243 101.549779766678  
93.2319962015465 105.382126899524 79.863426244511 81.8242150474253  
95.4162505381269 126.115065200084 102.672950481425 86.895648413144  
75.0136718534495  
RNF138 48.2910530887214 46.0713306971594 41.8751578329365  
48.665578118898 43.1252272136667 48.1591264215184 47.7390230243778  
40.3357777530419 69.9767092409915 53.7196173866021 43.0971787292711  
55.1804535845496  
RNF138P1 42.2455707947223 41.8848959280916 40.4070046183108  
33.3231576795423 40.148780650831 46.574682061365 36.5352572191451  
40.2382908228517 46.8873421271259 41.2276963324981 43.0016969050339  
43.9541718254769  
RNF139 36.0144420013819 42.6939394537076 37.8386378737561  
37.4223289687135 43.1252272136667 38.2293008890613 35.3362091871364  
32.4466419672036 36.7267557061938 43.401782064778 37.4642807402741  
37.6557714476853  
RNF14 137.424708183613 86.6186787663248 123.444247442399 109.23113111292  
91.3362264594431 167.014274808063 84.6655522075709 100.927111474879  
115.087963545095 125.801834682035 128.365609268093 139.989008296272  
RNF141 47.2862299990938 50.4872122867759 43.8495248991589  
61.8997157694697 53.0419743379342 55.3202238943712 71.3527183280827  
57.5640428227111 86.1741504863717 77.9085946827079 69.8899273527731  
78.6705291023488  
RNF144 313.080592198795 133.558028920419 57.50915811428  
93.7782490229256 88.5564369981649 106.317388820963 80.4479092568961  
261.470129378265 79.7882961549974 98.501431740607 70.3381994440425  
69.8505620106065  
RNF144B 122.495387796233 64.8903340853337 117.689172019617  
342.223067809915 61.3077641493507 70.380703483689 171.623830248512  
235.420582508332 201.800572658224 60.9905272201951 93.0801307192343  
123.536432289877  
RNF145 305.554059609771 101.882591864061 158.321459945365  
230.197573134703 89.8660321621128 165.843728663632 92.8579489575841  
84.8569316561572 148.944852825695 210.005571009784 175.529493306927  
307.264133974364  
RNF146 97.1634390603131 70.7202372217584 72.5288683768049  
77.2906963563431 75.9909523932333 123.768417863139 64.3669451425581



59.1533197797534 62.7977686460693 67.4760456862775 79.1074681877535  
93.955760127914  
RNF148 44.8914371498528 48.9899488302637 45.8844325913247  
42.5664883002833 46.3150221024046 60.9822577063534 57.8870110456492  
49.5185112777773 57.0301170427216 63.1091746640396 48.2910530887214  
55.7067742610401  
RNF149 642.946369683508 353.076989769287 488.277500837251  
1433.1813604069 320.684862879691 239.117228656704 322.440680131096  
503.187121806288 335.167786298149 444.471597593258 344.44626908553  
455.774407260725  
RNF150 87.1735705257803 47.765848710116 44.7829632472754  
79.7937658787441 42.9090346219023 320.504100222566 63.0119737420787  
112.021971795593 72.8653205184014 339.767107648884 352.768184657577  
138.401109242778  
RNF151 35.7012997405508 35.9740633536164 37.634370327756  
41.6045220683604 40.4639532172338 40.244271403831 37.9946685306274  
37.2738321651142 42.1089765085639 38.5921548841176 37.6921755067309  
36.449101775775  
RNF152 46.6348258763289 42.3550738181144 38.9790184198145  
39.7840818430159 42.7107928951766 43.9366081640576 42.629412460409  
43.5752393599169 43.8482802038826 42.3413611855132 46.5650556481721  
44.0451487108213  
RNF157 42.7150227340364 41.3610369241157 40.4882741869718  
40.7481155008596 42.0709558258414 37.9951997351435 39.0458123429605  
46.8954576545929 42.7150227340364 41.8613406887824 51.9302027391447  
41.6550823405646  
RNF165 41.8409927585705 45.7317208802318 50.6004078448405  
59.6153684374766 56.2305155589239 58.0910843932181 43.1931731665131  
53.838484549134 50.8485682149772 51.9547984751408 53.6895401581575  
42.7782216342806  
RNF166 49.085741080241 50.543526404059 54.6051538001037  
70.506090074243 47.4548471240051 45.4882438975269 65.8986841086198  
51.0724630072723 53.838484549134 56.685925255591 56.7765567227989  
40.4639532172338  
RNF167 131.156876010639 156.864177272437 114.404099081799  
134.952392466784 145.439350995461 147.557451530784 163.995560004001  
102.00080367858 109.062415049404 222.8744321245 172.929453277107  
144.657263336504  
RNF168 42.3433931248155 41.7337506166619 47.0940613507321  
41.0726336841311 37.5556299264699 45.3882138838137 43.8206425661746  
42.8482181313226 44.4395580493118 42.785429206422 38.3684202018524  
43.0930293831497  
RNF169 43.3638918705225 43.9421822132391 43.7630587657205  
43.4410741327254 43.3332476888305 46.7800033479223 42.1607322031054  
49.085741080241 48.4869909888679 46.5650556481721 49.7363778831003  
43.8575940017119  
RNF17 40.8028707756596 42.1607322031054 39.4236828498953 43.3554905202712  
38.4540849632254 41.7196307387855 40.7910160811527 41.0381860307445  
40.6957787921451 40.5613324908742 37.3369979635678 38.745552403895  
RNF170 138.50445813694 104.492750153479 89.1115172961797  
55.8709511400674 87.8967913380047 100.151116279734 87.455991111513  
67.5206810636627 94.6300022444815 135.973016473297 115.132600341395  
96.9051967257119

RNF175 40.148780650831 45.7979032939211 43.5710871617107  
36.3604951341921 42.0709558258414 38.4330755397458 53.0277416531043  
43.7396619462033 51.0062122023297 39.2623423164488 44.8872784170036  
38.2350720635382

RNF180 47.1962846565261 44.8529259387308 39.1799070031819  
39.2780515621926 47.2074332636566 52.2089306840125 49.1067959632109  
43.0390857698452 42.6366765186182 44.8997235283254 47.0940613507321  
47.1060577218993

RNF181 1027.59400018637 740.994425128952 1059.63540694644  
947.656220635965 516.076634990003 665.122091380755 782.639346040155  
1442.72006787259 824.946988188872 632.019639546131 667.837116137964  
768.888528247493

RNF183 71.9062462001972 54.5374188496807 47.0940613507321  
54.2886483704949 42.3685136297603 49.9699131196797 83.8811735017279  
29.745266251498 42.2577689927563 44.2580151149956 41.0808257270221  
46.3411353377615

RNF185 74.3766944386886 58.8281931439093 67.5417980425932  
87.114638423256 52.8190882379316 92.3477214133335 74.2690269784394  
71.8314470868658 81.6508259258669 113.655306804539 118.385089099623  
85.7732262204681

RNF186 41.0608773166058 44.5152708955623 39.1799070031819  
37.0732977341185 32.6463318577756 37.1317006162938 38.2933870238743  
39.6474008369935 37.3600014814388 40.2112371512838 40.547835538778  
34.0382693188794

RNF187 64.9367707455078 80.6083247572711 94.3953345963359  
67.474556589181 71.7263663921367 65.6914955077809 85.3227908896318  
67.9103729751746 100.076931518374 69.1623287497421 74.5654028199926  
62.58750768974

RNF190 43.2724556187214 43.2649781354792 41.8751578329365  
46.0228732507872 43.1252272136667 44.1737502492846 49.2546642180676  
47.3791873993182 41.074824727477 44.0409178714232 41.5421429082231  
38.5279745308203

RNF19A 127.588471566929 258.913621521866 134.817234321847  
120.34542294172 190.242383482058 119.333788465158 224.173852018278  
104.27034824534 282.603767561794 111.367789538268 107.251974803232  
125.091427687365

RNF19B 135.323750661937 148.016994658777 196.29493890075  
628.625814917301 128.532373805894 208.97126697486 150.374739898477  
210.38953368311 135.592113666246 109.844156801015 92.4619796591359  
130.121040883877

RNF2 40.7609952437622 34.5023764006976 43.401782064778 40.9607305725196  
48.0234896130991 37.9951997351435 43.8206425661746 43.1567024035183  
46.2027193115397 49.1928206164702 43.1931731665131 44.8372404608604

RNF20 203.53267380432 150.583488352207 108.700838142885 164.435300801872  
120.825113658705 275.314994786888 166.009268520425 248.924819383887  
128.327641457403 355.288272452203 302.588009553875 291.086512261106

RNF208 49.4786466722535 46.1569135229922 40.6312687664188  
37.8442841690502 46.1804647841331 40.6507422261428 48.8319884367456  
40.831207953647 42.4784375889044 48.1392888470269 42.357910063876  
41.2437378488025

RNF212 38.6454098044474 45.0905928998779 41.1367478979484  
42.357910063876 35.1411239266238 49.2050538150106 39.1539892144371  
45.3872406432794 41.863927676552 49.4006068471301 47.9942520395434  
47.6938628797168

RNF213 39.8662795144616 57.4538469832241 42.7303139017786  
56.2508140932179 46.3150221024046 43.7630587657205 43.3262148375525  
46.3685439301234 62.0272989884264 53.4109882045447 45.4799270968969  
45.5800840647989

RNF214 67.9531693869426 72.6647497338347 83.6862086874286  
67.0402749076279 82.3591293655947 62.2200723764909 72.8653205184014  
66.4626619269287 83.1874704625702 72.961444366037 77.707180044659  
79.0741890905715

RNF215 49.540449125788 53.2841144999258 41.9666541498638  
44.4367387274922 49.5666074434383 44.2607789091176 47.4439407315335  
40.1474543172332 43.1805016690297 41.9666541498638 42.911855821602  
57.1441484662045

RNF216 96.6833301748676 118.752208441493 95.0026207727863  
110.540953771795 162.708058265337 144.500148287951 99.5844079573552  
70.5761249670572 100.745154926774 99.0596863442346 89.4111455826308  
114.537682317715

RNF217 47.5647821785529 45.4143854024453 46.6588655218735  
58.5406981871153 42.1650127805175 56.8505380943422 43.4544762830742  
57.9713749600418 54.5952754712007 66.8026147385682 64.9959712888709  
80.8366627364071

RNF219 87.4335749014848 95.6662924228901 77.9085946827079  
89.0203733091224 112.000099082544 104.492750153479 80.7563265626648  
84.0899854321388 98.5609311953771 92.0862930476852 79.1922819549042  
90.1632837282491

RNF220 264.786938886338 245.060552951511 217.875223856197  
187.439021508049 277.837785971587 247.843927763772 304.658728492827  
158.769954040462 302.20349084931 188.432979046693 209.038077542654  
168.092241790885

RNF24 207.245428311682 79.2185250088688 100.057155418659 313.046160403661  
123.868848519181 127.418173390084 148.570371099987 100.114114765033  
157.568088397305 212.688298502868 189.47090669378 210.255784687052

RNF25 80.1549028765037 63.6287257620165 72.4913548133238 66.9218519793499  
71.1607965028029 73.9456720099807 67.7965120293445 85.6170780640867  
75.3761360028971 77.4046818339539 77.622501706827 60.4872675915085

RNF26 167.05554959607 114.617965877564 116.295564219236 73.1447139654971  
163.585662735512 93.6236680572139 165.311139930529 174.148714092395  
146.840603547323 132.508880040274 126.204310123186 93.6260859565297

RNF31 186.600931545083 142.863673914134 139.620154641549 124.976348531594  
123.978615472736 109.943883439481 133.151333210366 115.894467332637  
109.374838860558 170.150808455621 156.822939275312 116.927619635255

RNF32 42.466333667839 40.5852276210998 36.0306975524309 41.0219290963778  
43.1847628331565 41.0909708790194 41.0871827071116 44.8997235283254  
42.4784375889044 43.401782064778 39.6403089864678 45.4218947614732

RNF34 211.227389226633 179.767874494671 197.259755509929 178.525751043592  
193.468773556057 149.19643034862 210.200786815048 145.170590045628  
277.284338888467 202.983984966874 187.957702651679 157.856158440506

RNF38 102.365615739399 109.386655134289 84.047148416454 141.577762652792  
86.4195039096886 182.49650467392 100.289042948128 91.8935361535002  
90.9810377546009 187.689343320587 138.67794356779 158.17598244564

RNF39 48.3583786497948 65.5730163728961 93.4180535865914 44.6905691366696  
54.802736966312 42.0574848021044 52.4111687156893 57.1362071277099  
87.104092810486 69.805066579191 73.7873098190297 167.05554959607

|        |                  |                  |                  |                  |
|--------|------------------|------------------|------------------|------------------|
| RNF4   | 107.034189847828 | 143.13189461696  | 125.197314240529 | 124.156774983746 |
|        | 116.461730749198 | 128.559660070271 | 129.653830303132 | 93.1668080716761 |
|        | 135.800775637089 | 93.2870243833082 | 98.4699679900651 | 113.008760911729 |
| RNF40  | 164.547318765586 | 91.6253858792439 | 107.637618676176 | 118.854313907627 |
|        | 161.768763813052 | 108.806649898122 | 116.74427460886  | 161.008205823493 |
|        | 91.1834104205004 | 115.509409633975 | 140.78326016606  | 75.3696105759836 |
| RNF41  | 48.7646976789783 | 50.2303640563218 | 51.9885249508283 | 55.7616447490886 |
|        | 46.3150221024046 | 57.1752846228778 | 43.4544762830742 | 60.6706478075023 |
|        | 55.7522234735038 | 50.9506778292488 | 54.1618170692792 | 60.5948704279864 |
| RNF43  | 58.7404123614695 | 45.3486182278177 | 46.2625470410195 | 46.8954576545929 |
|        | 39.7568367479301 | 42.357910063876  | 58.2315917325629 | 51.9447450229707 |
|        | 66.8632294055679 | 69.9928775398776 | 68.4659783447092 | 65.6876778328592 |
| RNF44  | 136.355036262681 | 107.176733647834 | 157.133627517432 | 95.1423940686828 |
|        | 165.093395508014 | 68.6424653037264 | 85.3227908896318 | 119.243515595981 |
|        | 110.074666148474 | 100.499763255098 | 94.3537052300317 | 119.512426152446 |
| RNF5   | 97.0254711947754 | 75.5034623354897 | 80.3060865378414 | 64.8154690917175 |
|        | 88.4819048592858 | 96.3976093220249 | 100.139490974785 | 73.9624143741222 |
|        | 79.4528447794527 | 86.4114854104675 | 77.7714622826402 | 76.6094442444074 |
| RNF5P1 | 229.547114945412 | 196.623560874725 | 188.582370265555 |                  |
|        | 149.139710097196 | 195.654315886452 | 259.456935785521 | 242.58992925232  |
|        | 107.754432832706 | 150.405742308999 | 119.700522283289 | 130.230482445573 |
|        | 165.496075703734 |                  |                  |                  |
| RNF6   | 42.175859643566  | 44.6918600441328 | 43.1931731665131 | 37.5680550468481 |
|        | 42.046575509735  | 40.8634043028528 | 43.2645805835667 | 38.3194261431961 |
|        | 39.9444191873552 | 38.348740499324  | 39.5399188536544 | 43.8575940017119 |
| RNF7   | 728.257836227637 | 660.295993198711 | 682.227514643175 | 592.010988342149 |
|        | 826.490051619826 | 559.9670724278   | 592.010988342149 | 513.266895252699 |
|        | 685.386956092142 | 586.508419046212 | 527.439095170064 | 666.816487335088 |
| RNF8   | 74.5886835786452 | 63.092106057211  | 59.3709786862962 | 49.6479308322777 |
|        | 82.1344514651393 | 68.9937449813561 | 67.8184329440607 | 47.5950227477807 |
|        | 62.0272989884264 | 55.073022935193  | 53.1505787220552 | 66.0516224379323 |
| RNFT1  | 81.4269715766354 | 101.832945816193 | 95.2915739972533 | 100.168016285684 |
|        | 126.360723656793 | 70.5699797830702 | 93.0538726751588 | 68.4659783447092 |
|        | 97.0348634204639 | 46.7646877499666 | 51.838002904753  | 67.5047089908724 |
| RNGTT  | 205.772128732705 | 125.794379028627 | 146.997252473598 | 229.159869771704 |
|        | 102.993620677265 | 158.156217755244 | 166.553853424708 | 180.53214143537  |
|        | 132.851109034738 | 198.821443323024 | 210.096514889445 | 245.127632785841 |
| RNH1   | 186.395673402867 | 313.080592198795 | 353.213447404132 | 437.280601907944 |
|        | 214.369365247268 | 427.363555286404 | 225.827961496781 | 165.093395508014 |
|        | 370.027120412227 | 249.729778471447 | 347.196922795214 | 269.618616631857 |
| RNMT   | 409.151984783973 | 299.240215762404 | 304.718140992378 | 370.150839052727 |
|        | 340.20879802231  | 257.506228440451 | 299.136348099827 | 291.159547880488 |
|        | 397.154258378193 | 335.818251279914 | 264.718875269207 | 295.848968688724 |
| RNMTL1 | 283.563531065269 | 194.924141888391 | 224.030034866938 |                  |
|        | 148.871702513875 | 294.443061798191 | 237.359267889848 | 304.41727337972  |
|        | 209.551557135809 | 189.111092737256 | 273.349866592589 | 229.745018977185 |
|        | 165.061411701316 |                  |                  |                  |
| RNPC2  | 47.9175508887533 | 56.463481075522  | 40.4070046183108 | 53.3967242431461 |
|        | 47.8075998240396 | 44.6524308640784 | 44.6032218589199 | 45.4757965005055 |
|        | 47.9035532886869 | 44.4652605017595 | 43.844855336215  | 39.9519547348106 |
| RNPC3  | 50.315768338317  | 51.119812302881  | 56.3834889989413 | 59.0262390168156 |
|        | 51.0107745412152 | 58.3387916574158 | 53.7423898357583 | 54.1731035633439 |
|        | 51.4413099192899 | 53.2340637435567 | 54.8532558909227 | 51.3244198342335 |

|         |                  |                  |                  |                  |
|---------|------------------|------------------|------------------|------------------|
| RNPEP   | 125.997088252817 | 120.221914344372 | 209.099378471892 | 138.581471125405 |
|         | 119.291755076832 | 78.4359273717257 | 113.198141130994 | 126.038716672534 |
|         | 140.187433247353 | 120.274848052394 | 115.299308625328 | 115.622641633992 |
| RNPEPL1 | 49.6241203903354 | 51.3800036046133 | 49.8344973836834 |                  |
|         | 58.7338159410728 | 40.6723334103791 | 56.8505380943422 | 52.2476631126873 |
|         | 50.5070012045444 | 41.2870505273664 | 52.7972156492746 | 48.8744644207821 |
|         | 52.8455400026194 |                  |                  |                  |
| RNPS1   | 342.146013966482 | 412.421643885499 | 516.704027135707 | 284.351747562807 |
|         | 415.759723627205 | 409.554706384667 | 480.13416648493  | 186.818097299665 |
|         | 438.50123471613  | 401.202348352506 | 400.416888798951 | 331.984279378726 |
| RNU12   | 39.1590964332473 | 40.5400384479766 | 46.3411353377615 | 130.274451794636 |
|         | 40.148780650831  | 43.2805590023412 | 36.4098694708483 | 60.7942162859036 |
|         | 43.2761454096265 | 58.115198353247  | 50.1649089793069 | 53.3059058105836 |
| RNU2-1  | 38.5648843914189 | 39.8695929627783 | 39.1799070031819 |                  |
|         | 58.9168466928565 | 43.1252272136667 | 45.6129956328415 | 43.9450023643394 |
|         | 45.2806199505029 | 41.074824727477  | 41.2276963324981 | 42.7275315121163 |
|         | 43.3744503319109 |                  |                  |                  |
| RNUXA   | 192.732356915298 | 110.88526946931  | 129.414877519657 | 147.093338225478 |
|         | 101.987604729928 | 123.493308132159 | 128.635811501506 | 185.771041814711 |
|         | 132.242070552057 | 166.45998863285  | 200.082941320005 | 175.652989203497 |
| ROBO1   | 38.7270975453573 | 45.4771738245609 | 42.5406888281114 | 43.4410741327254 |
|         | 39.5595233162192 | 43.647594238679  | 42.3074504864935 | 40.831207953647  |
|         | 44.0383630714326 | 41.1222709786153 | 40.6783687486496 | 44.8827729633985 |
| ROBO2   | 40.308802735799  | 38.7344853699576 | 42.0621425894624 | 38.4540849632254 |
|         | 40.0599807618105 | 39.4551617322991 | 44.0687697278114 | 46.6384636367629 |
|         | 41.6340461942423 | 37.2686490268265 | 40.4094901248527 | 41.1868052124344 |
| ROBO3   | 84.0388582916959 | 72.3297091475814 | 65.2670315837785 | 65.524821699432  |
|         | 93.6591201235745 | 147.704325041249 | 85.9692990407066 | 82.8218647837178 |
|         | 56.657759220121  | 90.5603308057889 | 95.5325488969517 | 70.4262478188233 |
| ROBO4   | 44.436995101921  | 39.9697332660833 | 45.5883690965192 | 46.4555908533915 |
|         | 40.4639532172338 | 46.3715909653832 | 40.6750540874299 | 46.3685439301234 |
|         | 50.2223403889892 | 39.4710743516517 | 43.7585538437696 | 40.2669497398702 |
| ROCK1   | 45.6517320730042 | 48.6795178347248 | 46.614092935749  | 45.9441733841041 |
|         | 44.3557408297309 | 55.1547682957918 | 42.357910063876  | 39.3709357615493 |
|         | 46.1634822993009 | 41.1638563416981 | 43.6294818685075 | 53.7442594289333 |
| ROCK2   | 5297.71706629059 | 3818.71752181269 | 4569.48246031279 | 4916.82166008511 |
|         | 3379.67054115975 | 2465.65854657837 | 5156.59948231705 | 5438.34345794521 |
|         | 3114.05035137552 | 5566.52516420571 | 4820.70258471362 | 4216.69417265779 |
| ROD1    | 725.680256063016 | 1119.61164710566 | 521.029507993615 | 843.882354867791 |
|         | 652.224827983597 | 382.744696166534 | 1191.93354266135 | 1115.27580736237 |
|         | 926.61614755153  | 716.594794909513 | 683.099079617304 | 925.486088550061 |
| ROGDI   | 78.5216977073842 | 60.3928833351886 | 94.5055588176321 | 69.1931891474114 |
|         | 73.1654226019863 | 71.8466937395628 | 58.3675164086197 | 79.4916415027015 |
|         | 117.520762118299 | 114.533239859288 | 116.689864825026 | 80.6200293361016 |
| ROM1    | 67.9531693869426 | 54.4190527512508 | 59.2012779686869 | 79.262977183608  |
|         | 50.2163892855092 | 58.3387916574158 | 83.374777060444  | 68.8058577447202 |
|         | 58.4200819624972 | 56.1912096308988 | 60.7516146716018 | 52.8455400026194 |
| ROPN1   | 39.266565827316  | 38.6414316877471 | 35.9305494063137 | 35.6928955245309 |
|         | 38.6454098044474 | 45.1873487463472 | 39.7576136507593 | 37.86982638952   |
|         | 46.581796165231  | 45.6868589181768 | 36.7283081422707 | 47.6040671292013 |
| ROPN1B  | 41.6687259447533 | 43.3024738199084 | 44.0085722400254 |                  |
|         | 42.7458868082711 | 40.1073950092563 | 39.4574161090793 | 44.9059274051375 |
|         | 43.7805481603182 | 44.1247378839093 | 42.4229201717624 | 42.3346523186171 |
|         | 43.8271508323322 |                  |                  |                  |

ROPN1L 46.6348258763289 46.6314009405034 39.4710743516517  
 68.6379135603075 42.7982502551634 50.3245489035833 43.9450023643394  
 46.9986083378817 51.2066664465185 39.8873706855774 38.956280281655  
 43.7672102682067  
 ROR1 42.1679276329916 41.8848959280916 50.2869791217819 39.3750969348308  
 41.2740822675592 57.7463129434768 43.6025443656008 42.7431359850339  
 36.3352882516399 46.1390887492649 56.8056093987178 53.2340637435567  
 ROR2 145.193498675059 51.6869155634183 43.401782064778 100.774098314706  
 48.6224651100733 164.287737381703 57.4047331041592 65.5820437889838  
 77.4186160113063 200.059649606808 153.812414753676 145.267770598988  
 RORA 49.2118150743559 44.2479126216872 43.5710871617107 47.9019726523907  
 42.7599817015127 46.263826584899 44.4074592653814 51.0724630072723  
 46.7414272831181 44.571915452417 45.0965569801852 44.416113301755  
 RORB 39.9697332660833 38.9338521051669 36.3604951341921 45.7397504535169  
 36.6354013629791 42.8598805316863 38.0598374201407 41.4508241771315  
 34.7722083264266 48.1392888470269 62.6885730386156 48.9733758107788  
 RORC 70.2541961995753 43.3016395799961 52.8421046802739 42.4162492820012  
 38.745552403895 42.750861693377 45.8159331560062 49.9332280449549  
 46.0633179231318 64.0624077013652 55.9269493191353 47.4678477186801  
 ROS1 42.7150227340364 41.7337506166619 45.3974838013476 41.5464765641928  
 38.5512429290626 38.1169703906207 36.08956004634 38.3684202018524  
 42.8036731479932 44.0409178714232 40.9157352260901 41.863927676552  
 RP1 38.8336427948187 39.932537801639 42.9641759692926 38.4208429103799  
 42.3685136297603 37.7000400506818 42.22763273471 40.831207953647  
 39.3750969348308 43.5652644712197 41.3945375181463 39.6352613956998  
 RP11-45B20.2 42.9613924925696 41.554942319225 40.4070046183108  
 40.3589492801501 40.2449343247539 38.486220880314 39.2533668167483  
 41.4123755032424 40.9901805728485 38.957687788868 40.5750645132377  
 37.0953622406687  
 RP11-49G10.8 45.1912496459517 42.1607322031054 44.8872784170036  
 43.9282059368202 41.9842695818285 39.4953494583071 36.5352572191451  
 39.853866204927 40.3316153483289 36.9102644736882 42.7275315121163  
 38.0452862258803  
 RP11-529I10.4 137.424708183613 155.59062961332 149.260740603715  
 86.6411972262415 235.593721159442 111.669813610213 157.463465828715  
 148.770228614661 161.092366817598 110.09868737254 110.626479311082  
 127.567860003773  
 RP13-360B22.2 34.6977013306396 40.148780650831 37.0642268327439  
 40.9607305725196 42.1650127805175 39.3841861812262 41.3594868055879  
 43.4544762830742 40.137818555383 45.3530683538086 44.7114813656401  
 43.7672102682067  
 RP1L1 43.1805016690297 46.8236022402545 38.4043916290561 41.8778873678551  
 43.6587492470348 40.4359177791566 44.2166118829877 47.5950227477807  
 40.3316153483289 44.571915452417 41.3553369544097 41.7575097298927  
 RP2 76.309158701514 145.193498675059 120.289145237975 258.375785708747  
 89.2285288333749 93.3718038663074 139.758805241617 74.6572522248684  
 100.389686642657 51.6778366958973 60.394307846869 89.6670947876322  
 RP5-1022P6.2 61.356483470053 69.640968387662 80.6032289311256  
 205.413872130332 68.307513091369 91.7437837246405 102.626604917608  
 113.229816752006 75.9909523932333 82.2431666775699 77.2834482217973  
 83.7019398654324  
 RP9 246.924485443224 139.191263237202 174.609448758071 141.577762652792  
 202.529846569324 180.065047496273 285.901316389161 182.343696914747  
 231.085533860683 178.961579489906 177.845412804098 174.815922224726

|          |                  |                  |                  |                  |
|----------|------------------|------------------|------------------|------------------|
| RPA1     | 212.152751915521 | 425.174170332175 | 350.917244438732 | 255.946758662074 |
|          | 322.029568204596 | 343.304521604977 | 555.044139654886 | 224.914980996667 |
|          | 361.023743912857 | 400.760646547012 | 367.081499539744 | 351.637117984528 |
| RPA2     | 359.733786489623 | 407.249003342541 | 341.466774417813 | 457.860665614779 |
|          | 501.319993127353 | 401.347734852083 | 771.554891868456 | 617.808073077341 |
|          | 586.281182112872 | 514.076460398785 | 880.992328229414 | 642.211963248041 |
| RPA3     | 441.397616937015 | 373.626843592567 | 338.355170063433 | 323.957165066178 |
|          | 428.206419080492 | 257.194689822426 | 736.405815842011 | 688.390474335958 |
|          | 527.037018015766 | 180.53214143537  | 173.711189659585 | 353.463970335835 |
| RPA4     | 46.3390850717989 | 40.6380495994768 | 48.9944486068347 | 59.4674205670657 |
|          | 43.9450023643394 | 52.2089306840125 | 55.4004611309636 | 65.0656365694468 |
|          | 58.174555206394  | 79.9810256029665 | 79.8701900696361 | 68.7753456118815 |
| RPAIN    | 631.632335640448 | 704.601607617837 | 634.514100741768 | 388.132295362791 |
|          | 602.726022292973 | 428.515605971056 | 757.833254346899 | 466.074595343541 |
|          | 398.641868389511 | 498.284928805673 | 387.867128019374 | 561.509463439533 |
| RPAP1    | 60.6441065119394 | 66.3904351698776 | 52.1242102345408 | 57.0629653735694 |
|          | 64.4999048115671 | 61.2387559102636 | 80.354283778818  | 66.295597720304  |
|          | 78.7182388025668 | 68.8167148906225 | 70.2215218476683 | 55.6351010690528 |
| RPAP2    | 95.65872032796   | 86.7710020879725 | 81.2850357499192 | 90.696780047049  |
|          | 87.5074297754031 | 90.5359675350156 | 83.5149142053137 | 96.6957892186886 |
|          | 74.4365426051588 | 89.6670947876322 | 100.663054866186 | 102.77259665192  |
| RPAP3    | 84.4422623834916 | 101.383978726419 | 77.6385786739426 | 74.1068645821427 |
|          | 90.0157406552551 | 95.1818735488388 | 90.7037473522607 | 108.788705797019 |
|          | 129.252597914828 | 68.878562323012  | 66.5539062525344 | 92.2686401307542 |
| RPE      | 63.499841172847  | 76.9303701148105 | 75.5861488664745 | 54.3659493975064 |
|          | 116.304054038726 | 94.8260360398356 | 56.4809146784765 | 67.3976855661302 |
|          | 79.2824265044758 | 53.9412154719864 | 61.6395445916212 | 85.2805684630976 |
| RPE65    | 37.1485601150873 | 43.8495248991589 | 33.8558232866797 | 36.5393857306744 |
|          | 35.1411239266238 | 41.0582900711341 | 44.2166118829877 | 39.853866204927  |
|          | 38.3418933808844 | 46.6598879466655 | 43.7585538437696 | 39.4490233720848 |
| RPESP    | 85.9087280306456 | 114.719721626067 | 54.4384603094793 | 49.9014504704021 |
|          | 80.7321212028516 | 973.363245512859 | 356.826869112433 | 92.681224908389  |
|          | 46.0106098064475 | 400.973553604192 | 287.786165030406 | 745.219025960188 |
| RPGR     | 46.7660461027265 | 50.1314528043038 | 45.6989664108554 | 47.2009420656854 |
|          | 40.5372008011901 | 49.3172204533818 | 47.0910180172677 | 51.1694248620208 |
|          | 49.7868528436838 | 48.8623729374733 | 48.260931742163  | 51.3709954257843 |
| RPGRIP1  | 63.8626921347231 | 37.3634897565502 | 35.9305494063137 |                  |
|          | 37.9875302985336 | 37.6527901109005 | 35.7034203372528 | 43.9450023643394 |
|          | 37.0390589468421 | 48.7358147030082 | 33.9967481174035 | 36.131485826118  |
|          | 35.4484652445078 |                  |                  |                  |
| RPGRIP1L | 42.9104454767916 | 47.6229101519945 | 44.0451487108213 |                  |
|          | 46.1673159982664 | 41.7929491793697 | 44.8872784170036 | 44.7255207589606 |
|          | 47.2009420656854 | 38.1169703906207 | 42.8936990772838 | 45.6348103033479 |
|          | 44.1452943804044 |                  |                  |                  |
| RPH3A    | 49.1868644496737 | 44.5152708955623 | 46.0727230219512 | 41.8778873678551 |
|          | 37.6527901109005 | 44.4619248757502 | 46.4388841354122 | 39.5466975353131 |
|          | 42.4540072551568 | 45.0155543555707 | 44.1148826235374 | 39.9519547348106 |
| RPH3AL   | 90.0617510514621 | 90.2721521466478 | 81.382229980722  |                  |
|          | 41.5464765641928 | 74.6833250738044 | 47.4699236780425 | 63.1604223919703 |
|          | 62.4219686957673 | 81.0169370911764 | 98.7331384143685 | 99.6288131333575 |
|          | 99.0545942554244 |                  |                  |                  |
| RPIA     | 115.557690369703 | 112.250150357875 | 89.7299583757595 | 85.1847490113446 |
|          | 119.965950077259 | 100.802977734227 | 161.7095047889   | 420.761600667193 |
|          | 101.250422688816 | 165.121380058529 | 137.016387648703 | 152.824869071575 |

RPL10 43.1805016690297 41.2598458726002 40.4070046183108 41.9620007529243  
44.3166120733789 37.1894304543751 40.6750540874299 41.9315419791594  
38.6322728994674 41.6724739851995 39.8577530602176 38.195965820384  
RPL10A 3361.67247904403 4036.89580181979 4752.94498024732  
2331.12401106076 4344.25847766877 4036.89580181979 3838.19449971537  
3478.67753301901 3818.71752181269 5074.07305640514 4717.02689540013  
5218.25814076207  
RPL10L 77.1900613562529 70.4233710555202 62.0967404944031  
56.6458456890715 66.6118713143653 50.2163892855092 66.1940959364976  
62.9922928277769 73.3042538589134 70.0907269565408 62.9336909080086  
59.0894921452893  
RPL11 6027.02412617194 5438.34345794521 7168.83136860899 6134.89208517976  
6089.64191751349 6749.14636741447 6413.42384145372 7393.77508374057  
5525.13078364599 8441.71894028273 7235.0789252269 6673.00322263275  
RPL12 2528.6392272518 4259.50675863393 3490.63949257581 2791.75465171135  
2755.23573327276 5525.13078364599 2992.62035058532 3176.96480659196  
1776.78784112613 3520.7579823657 3776.54943917367 5733.54417656207  
RPL13 82.3385052270697 95.0738959950301 118.05982513603 68.3157692917711  
145.267770598988 180.756651647731 97.9401338178996 104.351256270039  
73.9986015964321 173.992867985744 161.008205823493 158.081235081686  
RPL13A 344.314901683001 799.803676957263 713.243132093773  
336.490083577377 527.97309138633 816.746599467159 284.105466865264  
399.80505620721 708.839262759372 854.712488657987 1294.42501356365  
873.451893437179  
RPL13L 59.2659299592508 89.4504034432321 104.900627862215  
96.0770202999531 80.9160262677505 133.720493104769 106.486195938039  
66.211494935811 78.5174639327946 137.484063876244 117.8523906126  
94.8260360398356  
RPL14 141.471672990444 87.0972426452686 96.4740168904128 81.0057400164851  
193.262615637464 270.724111544154 92.2095095678497 81.6529991377083  
93.1850674428555 360.900649927623 326.250872625748 325.990132666873  
RPL15 1117.26060212107 2232.61002288121 1554.42895572029 1487.80306986156  
2424.0414102425 4277.93019582362 1067.08316477623 548.815225941887  
1154.6386362 2393.42629339901 2456.86796652313 2705.15813218168  
RPL17 2448.64580552439 3966.51586153125 3681.41904661708 2878.82618761804  
2061.66570137425 4259.50675863393 2300.20602168385 2036.72286752819  
3070.83113612925 3070.83113612925 3010.38998829232 4200.38495514552  
RPL18 6483.09366281532 7562.42822724655 6413.42384145372 4093.70002166179  
9938.5091387622 9709.60940482862 7627.46814033012 5696.39636379286  
8630.67463560037 10351.5373412096 10483.5643876539 8050.256095383  
RPL18A 7323.77427153966 10910.7672404363 8937.3846214861  
8349.59691588869 16661.6081002448 10617.4323014458 8630.67463560037  
10235.3288951482 10910.7672404363 9709.60940482862 11176.402230735  
8937.3846214861  
RPL19 6089.64191751349 7393.77508374057 8259.38594893529 5112.4354472796  
7235.0789252269 7476.94487791412 9181.13240708506 5855.6498679729  
9938.5091387622 5971.45293864208 7476.94487791412 7911.19531717602  
RPL21 386.640440174303 598.970109654466 434.223722811041 631.632335640448  
594.611678976716 758.462554576949 441.397616937015 347.003621791919  
539.188951045594 392.237227927376 436.216696884703 1591.51486001004  
RPL22 963.224016480187 1689.77066894108 1351.49940447914 683.099079617304  
2054.64068255575 3176.96480659196 1069.3975598703 963.74601421037  
868.899376368472 1081.97502255142 1423.29307392266 1656.16581692717



RPL22L1 44.0328992213727 40.3384318592985 48.0191002461099  
39.853175885492 51.4527545197672 39.9397419279057 47.7390230243778  
43.2551508830106 37.4540772310118 43.0919221375514 48.2910530887214  
46.917149434588  
RPL23 537.342146022804 301.867441371793 397.154258378193 456.874884453965  
486.044304392285 594.184150517102 482.5816387921 583.915973546284  
452.2453761868 643.491217668415 736.846933148564 898.114119553014  
RPL23A 152.585423208022 184.105396912056 136.530734456168  
127.375858030077 316.073008787218 171.058650956601 181.123652339134  
193.782527748199 206.312848708143 161.48562926756 166.717256080341  
260.581111456578  
RPL23AP13 60.4991141099239 55.9459886217809 69.3645322033576  
75.6103053700122 57.0504111569238 105.197692490363 60.2938279880998  
89.8192713348784 57.9713749600418 79.9810256029665 78.253478446856  
80.8943070653517  
RPL23AP7 98.5746416750459 62.4914906186314 83.8113149043718  
99.5958921252583 90.6661301391451 113.979504140326 67.6767845246581  
67.1702819938085 76.034392064609 80.191847692094 88.5907320965949  
115.342852277396  
RPL24 3854.42494497831 4235.59743465057 4235.59743465057 2830.73694055758  
6027.02412617194 4665.45637589484 4148.07163380544 4148.07163380544  
4235.59743465057 3818.71752181269 3681.41904661708 5438.34345794521  
RPL26 585.771656887036 969.805093523651 990.431472174705 815.810781070699  
854.712488657987 1035.67547271468 616.265771322835 838.974043046676  
534.755211286733 669.776067547468 701.935442033195 1792.42490815074  
RPL26L1 247.074756460224 134.776408077533 240.431987635418  
291.232601825013 198.979794834746 197.259755509929 228.026217504784  
275.549982777518 251.299662213686 130.15891745292 155.050936910986  
192.598135054768  
RPL27 5156.59948231705 4058.32430616734 4948.93803183911 3749.78281766196  
6819.74871209328 6819.74871209328 5438.34345794521 4898.89844391477  
5895.03230740197 4916.82166008511 4986.44888767011 7168.83136860899  
RPL27A 4368.11345948444 7911.19531717602 7911.19531717602  
4406.55576617324 5696.39636379286 7235.0789252269 4482.5285743878  
4381.51418239047 5246.60459228386 4200.38495514552 4898.89844391477  
6483.09366281532  
RPL28 62.7669079605627 66.7256057011273 59.6565330440648 107.637618676176  
150.737482160358 81.8426140611297 85.8154958329408 73.6855877240541  
96.4112435621587 112.375316615894 123.032006903803 91.7158434954226  
RPL29 76.0975301977715 198.010793115588 139.164179214871 112.881899194726  
588.854342793207 139.883681090758 243.672418126374 81.7367617812869  
224.450710664296 61.5635554619635 60.6505672212119 98.4699679900651  
RPL29P2 45.0985088502363 48.8584917918986 54.9071823326024  
47.6687908290818 50.2163892855092 50.4022543872993 51.5967098638347  
57.2350830635912 52.4539007817929 56.4553747079294 49.3901004211918  
44.8372404608604  
RPL3 4427.89837060471 5932.92478996609 5696.39636379286 3490.63949257581  
4597.60989502097 5177.04105968809 5047.91205452316 4200.38495514552  
4458.76622334251 4784.36905964712 5177.04105968809 5601.18872540083  
RPL30 3399.75820494572 4665.45637589484 3114.05035137552 2575.86919902296  
5932.92478996609 4148.07163380544 5387.08056045279 2266.34088015654  
2598.78910128081 3043.12489526581 3313.98659031004 4858.39551231606

|         |                  |                  |                  |                  |
|---------|------------------|------------------|------------------|------------------|
| RPL31   | 976.566026758227 | 841.316771679857 | 1032.44965920118 | 735.751447981069 |
|         | 1149.02954135912 | 1247.50618540769 | 703.315796616275 | 779.996851709716 |
|         | 673.522667186915 | 1125.31394383117 | 964.268294825556 | 1771.43541011426 |
| RPL32   | 1848.50311456636 | 1813.65521720537 | 1817.14004766564 | 1776.78784112613 |
|         | 2474.22199172028 | 2313.21212353993 | 2568.97574985073 | 3010.38998829232 |
|         | 1606.26712101449 | 2424.0414102425  | 2348.48320928245 | 2184.70038900784 |
| RPL32P3 | 44.2350046179299 | 46.7980335276155 | 48.1682125052975 |                  |
|         | 47.27543600687   | 43.683792219729  | 45.7300501624017 | 40.2601451506332 |
|         | 49.5185112777773 | 44.3440839686558 | 46.1736875058473 | 47.6884372645373 |
|         | 46.8129509799753 |                  |                  |                  |
| RPL34   | 116.685453817071 | 139.191263237202 | 157.979422616649 | 173.343091136741 |
|         | 268.419751472464 | 156.043152125612 | 134.24897875016  | 170.172720177618 |
|         | 196.561401686392 | 130.515102593803 | 126.456130365187 | 215.504612948048 |
| RPL35   | 4058.32430616734 | 3520.7579823657  | 2300.20602168385 | 2551.57660786358 |
|         | 3490.63949257581 | 3869.93390477952 | 4277.93019582362 | 4277.93019582362 |
|         | 2498.54878472152 | 4820.70258471362 | 4328.723715755   | 3854.42494497831 |
| RPL35A  | 4168.41947709165 | 4168.41947709165 | 5156.59948231705 |                  |
|         | 3653.59181300011 | 5177.04105968809 | 5218.25814076207 | 3941.3269626913  |
|         | 4632.08655821299 | 3329.68037676265 | 4597.60989502097 | 3800.19142219719 |
|         | 5776.17749026501 |                  |                  |                  |
| RPL36   | 1040.102982885   | 1561.83892117664 | 1835.21901524331 | 1161.71671016964 |
|         | 2791.75465171135 | 2164.51925341969 | 1433.1813604069  | 1519.01001038342 |
|         | 1231.77360353254 | 1649.78627644882 | 1842.15643221012 | 1762.93413846062 |
| RPL36A  | 39.3100256336821 | 45.6948619492056 | 47.7052132264218 |                  |
|         | 40.3691324547049 | 47.5647821785529 | 40.9506062495231 | 45.8311458106942 |
|         | 55.7405934254857 | 53.0034632721031 | 42.3413611855132 | 48.9754340235127 |
|         | 43.1235886043549 |                  |                  |                  |
| RPL36AL | 2951.88559311416 | 1656.16581692717 | 2365.73772015255 |                  |
|         | 2272.91548405176 | 1408.59798540643 | 3143.97163345458 | 1145.59111340228 |
|         | 2243.24648907474 | 1689.77066894108 | 2365.73772015255 | 1656.16581692717 |
|         | 3282.4852236415  |                  |                  |                  |
| RPL37   | 58.3285450269055 | 53.7652236915868 | 51.371775055873  | 47.6687908290818 |
|         | 53.5594683028749 | 126.911056987607 | 55.2998422481855 | 45.7476095696859 |
|         | 46.7760357462635 | 81.3895045947915 | 72.5153335566211 | 82.8095009455738 |
| RPL37A  | 1195.24078948059 | 1239.68399088145 | 1157.65264077595 |                  |
|         | 557.455966274117 | 635.906934423716 | 1425.37639004849 | 700.010354583503 |
|         | 1176.37732422904 | 1191.93354266135 | 995.397944432196 | 1506.33570635551 |
|         | 1707.92349760322 |                  |                  |                  |
| RPL38   | 9852.7965902602  | 9582.11974031559 | 10483.5643876539 | 8545.48005557056 |
|         | 10910.7672404363 | 10996.2779403491 | 12125.3293116195 | 9181.13240708506 |
|         | 9488.06491634484 | 9060.10165509099 | 9852.7965902602  | 10351.5373412096 |
| RPL39   | 3941.3269626913  | 4368.11345948444 | 3726.73487426505 | 4128.92158369026 |
|         | 6186.45345364665 | 3329.68037676265 | 3562.96193568469 | 5297.71706629059 |
|         | 4820.70258471362 | 3546.97585966225 | 3234.36469403715 | 5811.22276358172 |
| RPL39L  | 62.8422809723679 | 98.6553805168141 | 55.094385444315  |                  |
|         | 136.392873701653 | 245.769212889294 | 140.504336039225 | 44.8643898647322 |
|         | 206.146732318529 | 40.3662560853635 | 64.9559356780521 | 60.1466326805616 |
|         | 77.7714622826402 |                  |                  |                  |
| RPL3L   | 43.0001432913058 | 42.9358255168086 | 40.931294690669  | 39.2780515621926 |
|         | 42.1650127805175 | 36.6271061451613 | 39.8695929627783 | 42.9301944191913 |
|         | 35.860430241131  | 36.9102644736882 | 44.3763859390287 | 38.8495095797881 |
| RPL4    | 2191.09005731751 | 2650.09507972593 | 2039.89728774097 | 1891.37245670852 |
|         | 3884.2191293028  | 4820.70258471362 | 1956.75875151802 | 1932.2647526188  |
|         | 2854.82112538867 | 3343.07293372655 | 3884.2191293028  | 3999.32180022337 |

|         |                  |                  |                  |                  |
|---------|------------------|------------------|------------------|------------------|
| RPL41   | 6606.35767508139 | 6134.89208517976 | 7476.94487791412 | 6673.00322263275 |
|         | 7323.77427153966 | 7681.71833395626 | 6555.04068292972 | 8630.67463560037 |
|         | 6749.14636741447 | 7627.46814033012 | 7022.41612496714 | 7980.71309230447 |
| RPL5    | 1824.79010714035 | 1197.13566108661 | 1480.95754707554 | 1065.70206468134 |
|         | 1242.75259587926 | 2357.96534075689 | 1208.33498233518 | 1575.71609894038 |
|         | 1382.25775340179 | 2506.05102956991 | 2201.39729904166 | 2138.23653387331 |
| RPL6    | 4665.45637589484 | 5218.25814076207 | 4820.70258471362 | 3690.00752647453 |
|         | 6134.89208517976 | 5479.94045861143 | 4948.93803183911 | 3546.97585966225 |
|         | 4503.77675488367 | 4948.93803183911 | 4427.89837060471 | 4482.5285743878  |
| RPL7    | 152.441506175141 | 165.905008152959 | 124.032371632524 | 132.93879018892  |
|         | 123.176449895397 | 225.690879436355 | 100.650129064849 | 129.456543260731 |
|         | 130.184962393833 | 152.187430924861 | 159.571799428131 | 227.439319520245 |
| RPL7A   | 83.877343750194  | 123.918925337643 | 88.6771566133367 | 104.672760332135 |
|         | 87.3957386451235 | 142.262349841307 | 129.965747812294 | 97.5962784863854 |
|         | 99.7668527666705 | 159.22638189198  | 126.546330358591 | 162.401599565682 |
| RPL7L1  | 2854.82112538867 | 1423.29307392266 | 1858.94179312821 |                  |
|         | 1723.37649434054 | 1573.61108703981 | 1202.11455437028 | 2633.34100695103 |
|         | 2992.62035058532 | 1111.13061382818 | 2944.3433949897  | 2588.47871581066 |
|         | 2067.66516256598 |                  |                  |                  |
| RPL8    | 5047.91205452316 | 6413.42384145372 | 5177.04105968809 | 2621.65272077828 |
|         | 5297.71706629059 | 5074.07305640514 | 5112.4354472796  | 2568.97574985073 |
|         | 4550.56817942699 | 4344.25847766877 | 4948.93803183911 | 4458.76622334251 |
| RPL9    | 1372.51401036753 | 1519.01001038342 | 2067.66516256598 | 1858.94179312821 |
|         | 3520.7579823657  | 3202.8848520816  | 1142.67599037881 | 1570.45778081591 |
|         | 1369.13346566895 | 2096.51999792183 | 1744.56688411113 | 2992.62035058532 |
| RPLP0   | 1275.78715071615 | 2323.81110653289 | 1428.47642890543 | 1111.13061382818 |
|         | 2365.73772015255 | 1914.9556343048  | 1676.22158135012 | 845.41973083225  |
|         | 2257.78227736778 | 834.14766574977  | 986.40790007743  | 2018.28984520892 |
| RPLP0P2 | 44.2350046179299 | 39.2907645923217 | 42.8270038153139 |                  |
|         | 33.9645433044281 | 39.859345745831  | 40.3357777530419 | 45.7452456977857 |
|         | 40.7311497914871 | 35.2143190355414 | 35.8304004211528 | 47.0940613507321 |
|         | 42.9887069977696 |                  |                  |                  |
| RPLP1   | 3234.36469403715 | 3592.44409869527 | 2091.0611913538  | 3010.38998829232 |
|         | 4058.32430616734 | 4482.5285743878  | 3421.24021192326 | 3143.97163345458 |
|         | 4015.88651424568 | 4058.32430616734 | 4858.39551231606 | 4168.41947709165 |
| RPLP2   | 7785.77078492993 | 10235.3288951482 | 10235.3288951482 | 8630.67463560037 |
|         | 8349.59691588869 | 7980.71309230447 | 8349.59691588869 | 7681.71833395626 |
|         | 8937.3846214861  | 8259.38594893529 | 9181.13240708506 | 8827.37298329149 |
| RPN1    | 1842.15643221012 | 1349.09482344633 | 1545.76489731307 | 2077.74475301595 |
|         | 2568.97574985073 | 1516.33074288338 | 2448.64580552439 | 1914.9556343048  |
|         | 2206.44541412808 | 975.544591158047 | 1339.29022988209 | 1219.52011418558 |
| RPN2    | 153.61084474789  | 168.307676704652 | 180.994353525666 | 177.067668324062 |
|         | 159.844078593375 | 88.2639730639822 | 211.421222959783 | 225.016731278437 |
|         | 233.326886009799 | 130.35828139117  | 158.17598244564  | 168.17913316957  |
| RPP14   | 38.304249186058  | 37.1685072112618 | 36.0306975524309 | 34.1051821768421 |
|         | 33.8558232866797 | 38.5252456306656 | 33.7574445386307 | 32.229154316188  |
|         | 35.0305278582179 | 36.9102644736882 | 33.6902293666089 | 36.2582325396375 |
| RPP21   | 1426.87261062373 | 1141.25078954012 | 1301.07436212673 | 528.512401493184 |
|         | 1561.83892117664 | 848.079114196986 | 1595.69503047506 | 958.473187253938 |
|         | 1271.62760896761 | 1139.81870068001 | 942.247437385029 | 1039.06999658544 |
| RPP25   | 161.48562926756  | 85.9799968870368 | 45.8844325913247 | 74.4365426051588 |
|         | 94.6432868887401 | 70.7238101239421 | 141.396509967298 | 105.308648028552 |
|         | 116.287075019475 | 88.3335649692467 | 74.8473087205709 | 77.9085946827079 |

|        |                  |                  |                  |                  |
|--------|------------------|------------------|------------------|------------------|
| RPP30  | 35.8208542506595 | 42.0709558258414 | 37.6557714476853 | 39.5637454855233 |
|        | 41.6806984441849 | 43.2312848495114 | 45.017247592678  | 40.7311497914871 |
|        | 39.3506426665347 | 41.9666541498638 | 40.1742127891824 | 42.828737648529  |
| RPP38  | 59.3353474684952 | 52.3579564953125 | 46.8267540220952 | 42.1273928203021 |
|        | 63.763257037939  | 47.8636003588181 | 61.4267636950869 | 57.8111054584154 |
|        | 63.7046039657949 | 40.9558083259517 | 48.5292718280498 | 42.4229201717624 |
| RPP40  | 724.881002237334 | 369.032450063274 | 363.324816966828 | 162.721587349434 |
|        | 1001.99175009124 | 270.110273110996 | 337.842694716836 | 319.796914465104 |
|        | 688.612748336336 | 190.076494896441 | 212.576203581294 | 190.81617208799  |
| RPPH1  | 54.8439819445945 | 75.2101993995344 | 56.6888826857797 | 189.289063944393 |
|        | 60.0736861987141 | 84.7113556042844 | 107.895235897156 | 119.088986733238 |
|        | 66.4251023257203 | 61.7502624458447 | 62.358854072801  | 58.5087296620514 |
| RPRC1  | 542.684866424241 | 525.687522832693 | 817.631505579476 | 739.541009338849 |
|        | 542.069156178791 | 915.936211119242 | 337.084861453686 | 440.282299601096 |
|        | 716.754656773542 | 624.954583057431 | 572.667024472672 | 619.950241162173 |
| RPRD1A | 95.042308285667  | 222.01145815859  | 200.144817111902 |                  |
|        | 123.841740274811 | 138.895316905243 | 226.235985918654 | 104.821285642918 |
|        | 157.714216527613 | 213.933347509147 | 234.172977976583 | 200.986069552443 |
|        | 217.976796656266 |                  |                  |                  |
| RPRM   | 46.441301934328  | 68.6804583979297 | 37.9482157381008 | 36.3604951341921 |
|        | 54.4586176399381 | 159.835690229505 | 176.594203350958 | 48.87875862356   |
|        | 80.8728961146267 | 84.2960453806012 | 206.768099707991 | 77.1059855034406 |
| RPRML  | 49.7827734675743 | 43.9421822132391 | 41.9666541498638 | 39.6292788039793 |
|        | 50.3713170502557 | 46.263826584899  | 47.4439407315335 | 39.1652965788406 |
|        | 41.074824727477  | 41.1222709786153 | 33.9478220100351 | 42.57175366709   |
| RPS10  | 8937.3846214861  | 6309.53691418065 | 7323.77427153966 | 6356.05807792831 |
|        | 7785.77078492993 | 8349.59691588869 | 7980.71309230447 | 6027.02412617194 |
|        | 6938.87250165681 | 7393.77508374057 | 8349.59691588869 | 7785.77078492993 |
| RPS11  | 3818.71752181269 | 8441.71894028273 | 5636.93532853955 | 4381.51418239047 |
|        | 8827.37298329149 | 6258.22561934986 | 4717.02689540013 | 4717.02689540013 |
|        | 7127.13565491501 | 5112.4354472796  | 6606.35767508139 | 7022.41612496714 |
| RPS12  | 8441.71894028273 | 8827.37298329149 | 8630.67463560037 | 7562.42822724655 |
|        | 8703.02873382565 | 9938.5091387622  | 6089.64191751349 | 6089.64191751349 |
|        | 7681.71833395626 | 8349.59691588869 | 10072.2414399735 | 11410.3307451176 |
| RPS13  | 1393.24135330226 | 1991.4199819544  | 2551.57660786358 | 1726.90584784425 |
|        | 2101.59244895554 | 3153.71394627237 | 1061.61186520958 | 1559.50766982801 |
|        | 2215.01815680371 | 2611.32405374107 | 3202.8848520816  | 3869.93390477952 |
| RPS14  | 3602.30252142918 | 2272.91548405176 | 4503.77675488367 | 3726.73487426505 |
|        | 3634.98300564068 | 5387.08056045279 | 2944.3433949897  | 3854.42494497831 |
|        | 4259.50675863393 | 4617.45430247751 | 4752.94498024732 | 4368.11345948444 |
| RPS15  | 1549.93897368117 | 2337.7738990994  | 2354.00192115549 | 1634.61795848352 |
|        | 3999.32180022337 | 3244.27810937143 | 2598.78910128081 | 2184.70038900784 |
|        | 2101.59244895554 | 2374.1766901821  | 2779.37660132136 | 2300.20602168385 |
| RPS15A | 2054.64068255575 | 2061.66570137425 | 3634.98300564068 |                  |
|        | 2672.94421680196 | 2513.15722262176 | 3217.83121827744 | 1511.33844030783 |
|        | 1956.75875151802 | 2272.91548405176 | 2672.94421680196 | 2354.00192115549 |
|        | 3562.96193568469 |                  |                  |                  |
| RPS16  | 9181.13240708506 | 9181.13240708506 | 9852.7965902602  | 7980.71309230447 |
|        | 12770.8282719641 | 10072.2414399735 | 16661.6081002448 | 11795.0477101407 |
|        | 12770.8282719641 | 10910.7672404363 | 10617.4323014458 | 9938.5091387622  |
| RPS17  | 4148.07163380544 | 4458.76622334251 | 3190.0108307463  | 3786.90274075023 |
|        | 5387.08056045279 | 4344.25847766877 | 4128.92158369026 | 4036.89580181979 |
|        | 3099.21690111993 | 3999.32180022337 | 3749.78281766196 | 5297.71706629059 |

RPS18 3153.71394627237 3282.4852236415 2830.73694055758 2024.4791883541  
3726.73487426505 3818.71752181269 4597.60989502097 2611.32405374107  
2816.7754199004 3707.73750609316 3761.48462220262 2903.00880209344  
RPS19 4986.44888767011 5387.08056045279 4381.51418239047 4259.50675863393  
6483.09366281532 4948.93803183911 7022.41612496714 6483.09366281532  
7323.77427153966 5932.92478996609 5811.22276358172 5047.91205452316  
RPS19BP1 193.730784033221 170.682363891841 173.992867985744  
239.924746743429 206.28819203182 309.994784298282 325.224254365274  
217.658421476562 306.2944404016622 211.164957509884 219.64979849407  
204.944787289897  
RPS2 1780.14552702126 4597.60989502097 4858.39551231606 2178.59848996529  
4235.59743465057 3562.96193568469 3143.97163345458 1169.14891282789  
2978.46032143413 1925.20977162704 2435.70120719503 3478.67753301901  
RPS20 4036.89580181979 3653.59181300011 4986.44888767011 3043.12489526581  
4168.41947709165 3999.32180022337 3114.05035137552 2733.80542760533  
4569.48246031279 4277.93019582362 3818.71752181269 3884.2191293028  
RPS21 338.656401813365 447.348799009312 432.669787408904 478.799250340246  
652.224827983597 549.407911286514 514.261598258395 464.99944459917  
428.105433953405 220.766843166754 221.71759246183 338.72596574658  
RPS23 435.325038193179 1204.34388579291 129.810477623628 202.578421978121  
517.664764759512 2640.06306087033 392.709496239795 442.080188140864  
577.276184555955 966.803172864162 302.79352975792 682.479411898549  
RPS24 743.463635670141 775.515071756239 843.882354867791 769.685677484067  
1093.04440713629 883.06773454117 947.656220635965 1163.0370991733  
1372.51401036753 1089.08276262641 1195.24078948059 1096.1705171588  
RPS25 8630.67463560037 8703.02873382565 9709.60940482862 8703.02873382565  
12125.3293116195 11410.3307451176 6873.84878164654 8349.59691588869  
10617.4323014458 10617.4323014458 9938.5091387622 12770.8282719641  
RPS26 544.946796643478 1282.9181829891 909.843512894628 521.029507993615  
427.972184856393 1303.33517942343 524.451156145427 1490.1549980903  
985.328482076985 955.088515235485 333.566613571224 448.787414220553  
RPS26L 1370.76188322111 2348.48320928245 1850.06063216244  
768.354209323884 817.631505579476 2002.0536042686 935.815928529014  
4328.723715755 2545.03032507597 2911.10227993347 1061.61186520958  
807.620534408416  
RPS26L1 981.039763059681 2633.34100695103 1792.42490815074  
712.80113322987 737.604036996153 1856.97585515091 871.238169066998  
2354.00192115549 1712.55038816005 1457.72260892651 451.820169649522  
637.035929429013  
RPS26P10 47.7267190613906 57.8405769800773 61.6878176260761  
44.0451487108213 46.1804647841331 51.8103411703261 42.9803717121865  
52.5909491535773 59.8158518516035 49.9493230064613 37.1059647239814  
45.1735152121056  
RPS27 7562.42822724655 6819.74871209328 8827.37298329149 8937.3846214861  
8630.67463560037 9488.06491634484 6186.45345364665 12125.3293116195  
7235.0789252269 9852.7965902602 8545.48005557056 10996.2779403491  
RPS27A 6555.04068292972 5177.04105968809 5018.90384962952  
5246.60459228386 4898.89844391477 5696.39636379286 4665.45637589484  
7022.41612496714 4632.08655821299 7075.82842238887 6258.22561934986  
7323.77427153966  
RPS27L 773.781266760336 454.185408362583 435.209988251425  
985.328482076985 285.97627172608 975.544591158047 319.596352961751  
685.386956092142 394.073743195755 702.737741114234 644.368005872231  
803.548811322583

RPS28 812.386878774445 884.036280777358 670.271164195182 805.87120346756  
1211.8832855325 753.976423227915 527.037018015766 971.856840043688  
1071.64675274806 1835.21901524331 1501.67042548971 1053.67279913417  
RPS29 6134.89208517976 6483.09366281532 5971.45293864208 6938.87250165681  
5112.4354472796 5776.17749026501 4632.08655821299 6673.00322263275  
6413.42384145372 5601.18872540083 5018.90384962952 7681.71833395626  
RPS3 5218.25814076207 7168.83136860899 7075.82842238887 4617.45430247751  
9488.06491634484 7562.42822724655 8545.48005557056 7235.0789252269  
7168.83136860899 6819.74871209328 7681.71833395626 8545.48005557056  
RPS3A 1575.71609894038 1731.19220270448 1886.05449875658 1796.47241860175  
2077.74475301595 2393.42629339901 1780.14552702126 1842.15643221012  
1575.71609894038 2551.57660786358 2488.32876359853 2966.53151444114  
RPS4X 1068.10627239579 1145.59111340228 1658.86829668934 971.856840043688  
1320.7894611262 2150.8715161597 1018.35211991691 1287.41527826233  
1297.78424326775 1349.09482344633 1554.42895572029 2257.78227736778  
RPS4Y1 2002.0536042686 858.975085087497 52.2132783757422  
730.168814097451 121.552188287725 1310.03307063841 732.454837219705  
2272.91548405176 637.824136761292 1642.75555340648 1601.52194699063  
1824.79010714035  
RPS4Y2 95.3300728806601 69.9767092409915 42.2577689927563  
78.1583955490018 49.32293280121 85.1544284060549 78.1623301184313  
107.682738819549 79.3861418060845 87.2316853416374 93.5982028088194  
98.0307965290686  
RPS5 2633.34100695103 6027.02412617194 4898.89844391477 3776.54943917367  
9060.10165509099 6356.05807792831 4200.38495514552 2588.47871581066  
10996.2779403491 6186.45345364665 5601.18872540083 5696.39636379286  
RPS6 3786.90274075023 6356.05807792831 4299.4451139256 2844.5506310828  
5156.59948231705 4986.44888767011 4344.25847766877 4458.76622334251  
3391.65926812276 4235.59743465057 5696.39636379286 7235.0789252269  
RPS6KA1 91.1926678904253 61.2450200533343 77.7907484334847  
113.6408244935 64.0162246399972 49.9256753636167 74.369136940675  
83.3826639718546 96.9051967257119 79.6770200338268 80.5388767883646  
74.4365426051588  
RPS6KA2 130.230482445573 107.54932544455 102.150058925164  
143.304938314706 104.412207245626 126.128760255542 104.650071846586  
87.4850071876743 60.7605365979891 135.580139597457 140.610918488396  
134.132985360393  
RPS6KA3 50.9381343674699 56.5319193881205 49.6978906361694  
46.0228732507872 49.2172346679677 52.9849979441253 50.4662238169527  
51.3247667439139 47.3213303943727 47.0797760763156 49.5462425809174  
53.7820518773759  
RPS6KA4 80.4479092568961 108.39424630351 104.704892803169  
78.3509756704423 143.251956814524 71.1607965028029 102.294142438313  
107.971806573919 132.473918053428 84.1639779987105 86.8330533522204  
77.3999378505514  
RPS6KA5 80.2070411865083 62.6236991757723 90.6191520659197  
70.3646137594581 55.2214187655851 189.650905999631 73.7495118153367  
65.1637149462661 62.7977686460693 99.9552732785915 106.443777149496  
96.5175130622216  
RPS6KA6 53.1309801459151 51.524711857679 45.8844325913247  
55.8709511400674 51.1368583672022 46.6872654833579 54.1707158323527  
55.8087097725119 61.3733228199803 43.4885245598939 53.7475011049549  
64.863894209343

RPS6KB1 328.341232263338 171.205726660714 176.492987902471  
209.31241212773 220.217797955745 201.163076338483 230.142262693206  
227.361044585582 265.545792706874 329.677454924062 252.775631043952  
257.948490663615  
RPS6KB2 256.675896425075 318.069132873489 418.01691355558  
327.283431584541 631.110081413363 245.439289067575 456.467726693355  
343.764108830519 393.209708455013 304.133852957499 321.949943388959  
181.545493080363  
RPS6KC1 57.2960245538881 71.4197504261453 66.288032400574  
73.7986685173579 65.1271567764953 76.4439037944547 59.1040441894478  
74.5822971881866 67.389417016806 73.0394191668858 75.0426778826847  
69.2213838763756  
RPS6KL1 60.7371790125714 46.0023068797812 45.4865173433646  
43.074472921841 61.3077641493507 46.3715909653832 44.4639405506967  
47.7889447429963 50.5785738734431 39.4710743516517 45.0589947942306  
45.8546719310325  
RPS7 112.048972076936 107.453572798098 104.412207245626 110.666686474986  
347.145902252055 118.806070800059 99.2824152850072 121.782045054657  
117.565415291934 72.9126349246129 69.5544840164738 122.405413080836  
RPS9 2045.24530722676 4093.70002166179 3021.24285327836 3502.80810319252  
4277.93019582362 5297.71706629059 3653.59181300011 2138.23653387331  
3399.75820494572 3634.98300564068 4406.55576617324 3776.54943917367  
RPSA 2944.3433949897 4898.89844391477 5438.34345794521 3244.27810937143  
10483.5643876539 4503.77675488367 4617.45430247751 2771.14077845128  
4858.39551231606 5525.13078364599 4569.48246031279 4235.59743465057  
RPTN 41.2424637338424 40.5400384479766 44.6032218589199 39.6292788039793  
46.5557478175976 43.2805590023412 41.3594868055879 44.2159020605784  
43.1805016690297 39.5637454855233 41.4508241771315 39.6352613956998  
RPUSD1 141.977447082092 162.424734330982 199.776860110557  
115.913030448537 232.193215437232 114.389392280707 172.285394357607  
62.4219686957673 171.021755568144 114.321083441061 118.467231612638  
82.6157566292355  
RPUSD2 403.243939813779 334.349204174886 204.130491885587  
209.31241212773 621.980260052085 218.552143403657 467.645011859047  
328.962069934895 344.737170118121 272.405201392009 288.687391623935  
191.253860976433  
RPUSD3 169.391313189738 270.202959012185 319.722393409101  
134.952392466784 512.951288394692 192.398575159246 227.739219647972  
275.314994786888 226.090904721424 216.247225354243 204.659954879641  
193.01447006167  
RPUSD4 450.972039573066 354.861943266984 292.600202149564  
295.473526251997 577.276184555955 348.913213159222 411.254448823371  
574.14982128922 308.480931502803 682.35345164708 480.902561112949  
382.312820492386  
RQCD1 127.836645375421 193.649113002244 132.223745961048 172.237164781821  
222.426799131736 138.916915463074 189.425423538906 131.258204302177  
133.074560812703 73.3479915711031 77.4625808567081 109.017269529278  
RRAD 46.9395507483816 59.135659721231 54.1637401903523 70.8835636550472  
40.4166536885831 174.263925108623 45.223075311113 75.561262816077  
42.6366765186182 58.115198353247 73.0970339739187 46.7591817286632  
RRAGA 940.781370938596 1014.6400720037 846.096424249173 645.702744916884  
1053.67279913417 1277.40606021272 1205.82775512007 731.670315613547  
748.372940917543 1052.16097214718 1127.96214301065 1161.71671016964

|       |                  |                  |                  |                  |
|-------|------------------|------------------|------------------|------------------|
| RRAGB | 76.0532592222027 | 83.6351558609087 | 80.0919469092368 | 71.7167037224069 |
|       | 69.4009439491061 | 101.2970835312   | 68.8167148906225 | 82.6709662235238 |
|       | 100.02732841841  | 107.818253499703 | 95.1468654370952 | 106.99628036922  |
| RRAGC | 281.201604778921 | 121.432592327754 | 152.467040827584 | 415.477167615547 |
|       | 172.451522479253 | 195.836475280084 | 207.275014827939 | 253.910836731947 |
|       | 474.729653426958 | 261.374019422095 | 243.217623613383 | 160.883501367581 |
| RRAGD | 173.603999265239 | 71.8576824255215 | 54.842638106265  | 626.570239685127 |
|       | 101.383978726419 | 266.178061771978 | 223.801865347687 | 99.2432911346944 |
|       | 219.527698657901 | 121.712800273272 | 186.477689350702 | 176.839214683647 |
| RRAS  | 318.369837408344 | 200.615897175992 | 573.613497159192 | 424.085665569421 |
|       | 239.70137568297  | 1601.52194699063 | 112.281286038716 | 168.522052983892 |
|       | 371.866371754287 | 799.399983719702 | 735.751447981069 | 1001.99175009124 |
| RRAS2 | 124.965915196815 | 109.481322353402 | 101.403739410832 | 103.961956810572 |
|       | 143.773311381452 | 135.06215093641  | 128.300809076274 | 96.2680061150588 |
|       | 147.841274204532 | 89.8035133597498 | 89.0684909049451 | 140.369714831352 |
| RRBP1 | 502.67939538729  | 372.239177888445 | 402.571146447946 | 588.972273484465 |
|       | 360.668308246913 | 338.355170063433 | 396.167219131922 | 432.945510073269 |
|       | 242.673166257518 | 352.768184657577 | 406.500583302121 | 314.856937113103 |
| RREB1 | 55.6904617926772 | 51.909968572392  | 59.2012779686869 | 48.9944486068347 |
|       | 51.8562635270111 | 49.9162522057712 | 46.7100796279384 | 48.2109175258674 |
|       | 58.6593748588955 | 49.1200355938198 | 48.7078937513299 | 53.9431600945419 |
| RRH   | 38.7537364570873 | 40.3384318592985 | 40.8420925848403 | 36.3604951341921 |
|       | 37.7576900881741 | 33.7818132446042 | 35.9058393060637 | 35.2642250366721 |
|       | 32.396635964353  | 37.1275334308172 | 38.5668610487033 | 38.3291713594599 |
| RRM1  | 354.861943266984 | 778.723771259404 | 595.012422454829 | 397.020287751914 |
|       | 480.13416648493  | 456.757277476069 | 855.602941621804 | 736.846933148564 |
|       | 697.57030127315  | 427.679475038106 | 480.13416648493  | 509.879213331349 |
| RRM2  | 85.6170780640867 | 107.413918714848 | 85.271985416622  | 50.8567345921473 |
|       | 178.881586334601 | 63.7818442618767 | 131.808634405319 | 80.3860547572521 |
|       | 111.643323610073 | 39.6719190054379 | 41.0050831223107 | 40.8681871019812 |
| RRM2B | 63.5693267269002 | 74.8071157013401 | 59.3164315859919 | 60.0856496605043 |
|       | 70.4204944097269 | 64.6446465846487 | 49.6872467499977 | 44.7520317855773 |
|       | 71.6573554353691 | 49.0841460667818 | 51.3560869192313 | 66.3404989659221 |
| RRN3  | 46.6348258763289 | 49.7363778831003 | 51.8122261766744 | 38.0958223740111 |
|       | 48.2748123114598 | 47.7556758818053 | 41.9393838138203 | 53.1052228246467 |
|       | 47.4699236780425 | 51.3351387089044 | 56.9320717885002 | 61.7502624458447 |
| RRP12 | 119.591054636527 | 167.014274808063 | 129.938114164087 | 157.095926797414 |
|       | 172.102568448455 | 119.808125185521 | 194.862177434028 | 193.196385709124 |
|       | 111.397578350396 | 110.550102209676 | 128.157032116902 | 110.626479311082 |
| RRP15 | 114.979124960177 | 118.714977712617 | 121.423421895502 | 122.024487499513 |
|       | 257.993462737264 | 155.123252685926 | 210.605371352247 | 169.603165827302 |
|       | 129.042495848264 | 126.897002134472 | 118.57174795047  | 175.378964448101 |
| RRP1B | 75.9909523932333 | 90.5603308057889 | 111.735319884512 | 79.1000897258245 |
|       | 228.054565950253 | 85.8059456975413 | 94.3537052300317 | 80.7067505750848 |
|       | 102.457537266105 | 71.0619469948187 | 63.664265793911  | 60.4872675915085 |
| RRP7A | 463.684654468418 | 289.716911324484 | 269.044011137638 | 319.659366973269 |
|       | 178.323615832679 | 323.780380243759 | 320.555790243104 | 441.710000911092 |
|       | 268.265540230814 | 129.550925624841 | 228.29142882275  | 179.342338803631 |
| RRP9  | 71.9062462001972 | 94.3229189690855 | 63.7744603935682 | 64.5347406608537 |
|       | 171.501864800548 | 69.8832723783498 | 94.1289383735162 | 71.5062409407193 |
|       | 92.5512757064631 | 56.685925255591  | 72.768998788927  | 58.7382738968248 |
| RRS1  | 270.600852806342 | 355.00914527669  | 199.970127219451 | 94.7283425282671 |
|       | 469.30167430316  | 301.357530757236 | 229.992809034971 | 307.550936236018 |
|       | 285.511923726609 | 157.906415100288 | 209.794541970107 | 239.023368693467 |



|         |                  |                  |                  |                  |
|---------|------------------|------------------|------------------|------------------|
| RS1     | 41.8409927585705 | 41.3610369241157 | 43.7630587657205 | 43.074472921841  |
|         | 41.1868052124344 | 37.0180934800573 | 42.1607322031054 | 37.86982638952   |
|         | 44.2607789091176 | 39.8873706855774 | 44.2925355984056 | 39.2469742642337 |
| RSAD1   | 69.7442393277127 | 66.8693882433359 | 55.2141529491512 | 62.1776700757427 |
|         | 75.0665411373616 | 50.0748292497578 | 53.8687221233237 | 71.5062409407193 |
|         | 67.235655687817  | 94.8742116922003 | 74.466989900636  | 70.25295977615   |
| RSAD2   | 108.928854330744 | 76.7710944291287 | 63.3544794716167 | 94.9785931907153 |
|         | 43.4544762830742 | 51.8103411703261 | 53.1884505015411 | 76.9373289454707 |
|         | 48.1174861108648 | 54.3554233228353 | 47.8284278211109 | 41.2437378488025 |
| RSBN1   | 238.164418453962 | 175.936150174315 | 166.910579215196 | 252.775631043952 |
|         | 176.064476306748 | 215.68113524702  | 182.49650467392  | 150.985239447761 |
|         | 295.848968688724 | 383.00934152588  | 314.36962447353  | 281.141138830497 |
| RSBN1L  | 70.3757673501097 | 94.9365530062692 | 78.9701459806641 |                  |
|         | 94.080489738662  | 85.1661952927159 | 103.343354834837 | 82.6381941930783 |
|         | 59.4674205670657 | 81.552417816742  | 68.534940191185  | 69.1945249877407 |
|         | 78.1623301184313 |                  |                  |                  |
| RSC1A1  | 55.3153799233744 | 78.5174639327946 | 61.1076362129586 |                  |
|         | 53.593974682612  | 68.6627996695828 | 58.5530199658661 | 63.7721358300879 |
|         | 159.603518169388 | 74.9179396623258 | 90.6805895192707 | 93.1564463081702 |
|         | 76.3824005526731 |                  |                  |                  |
| RSF1    | 52.5792653122861 | 42.9358255168086 | 38.7745734037492 | 38.4208429103799 |
|         | 48.8381507187986 | 37.3799542961839 | 39.0458123429605 | 41.1575777497576 |
|         | 37.4540772310118 | 39.8873706855774 | 39.6403089864678 | 43.4709415392696 |
| RSHL1   | 43.6706764143908 | 39.9697332660833 | 45.1569741609597 | 42.9358255168086 |
|         | 40.5710637884029 | 39.2985791324641 | 41.4742337714895 | 45.4757965005055 |
|         | 47.7086093893038 | 38.4187686307607 | 37.2892641289258 | 39.7411455670172 |
| RSHL3   | 41.0043775553254 | 42.7775752471711 | 38.941855825269  | 40.8681871019812 |
|         | 40.5235471987417 | 42.2114134935898 | 41.6466169548846 | 39.4223544019653 |
|         | 38.2874316439311 | 44.9673049606589 | 43.363245077835  | 38.6454098044474 |
| RSL1D1  | 381.198152331624 | 559.559234461244 | 797.019657306322 |                  |
|         | 332.933704863586 | 699.74961331867  | 892.323580265478 | 508.278222733886 |
|         | 631.110081413363 | 526.146757036152 | 530.853153115366 | 630.53864514662  |
|         | 640.78586776574  |                  |                  |                  |
| RSPH1   | 44.6231541342    | 43.683792219729  | 53.2046867327331 | 41.8778873678551 |
|         | 46.6397391251762 | 42.9695585740813 | 52.2476631126873 | 51.555506218204  |
|         | 43.8482802038826 | 38.4187686307607 | 39.2542963855807 | 48.4535991392809 |
| RSPH10B | 40.8681871019812 | 40.3850714987723 | 41.437237454134  |                  |
|         | 40.0322420615846 | 40.2449343247539 | 40.650742261428  | 40.8714654152472 |
|         | 45.1241645678646 | 40.2739700860114 | 40.2579040125416 | 41.7272875295469 |
|         | 42.5271877237235 |                  |                  |                  |
| RSPH3   | 86.2021418088902 | 100.616027485975 | 134.271727318694 | 85.7983996395757 |
|         | 75.0665411373616 | 86.915098846441  | 81.0331497830643 | 93.6124140212565 |
|         | 73.1215732923523 | 87.0573871033894 | 109.677588309718 | 108.558977253184 |
| RSP01   | 31.6557652929457 | 38.8336427948187 | 44.696023817801  | 41.3027031037343 |
|         | 32.4181238410234 | 31.8228237796461 | 36.634024014558  | 38.745552403895  |
|         | 40.9901805728485 | 41.5435611403119 | 40.2649309204478 | 42.57175366709   |
| RSP02   | 54.6235981131919 | 52.7948184519106 | 43.4709415392696 | 48.856176220627  |
|         | 46.0493141231657 | 69.7677752398541 | 56.1463616087682 | 50.0802438185974 |
|         | 49.8472708021525 | 53.7554360529143 | 48.7502645382856 | 49.434568584642  |
| RSP03   | 81.9258201510475 | 58.7111274254142 | 67.8010199320754 | 127.789065386943 |
|         | 65.3933030211114 | 319.596352961751 | 64.232967574797  | 68.4659783447092 |
|         | 62.9922928277769 | 153.966227068697 | 87.6098790075242 | 115.229070906222 |

|         |                  |                  |                  |                  |
|---------|------------------|------------------|------------------|------------------|
| RSPO4   | 44.2718517563299 | 37.8685585043426 | 38.195965820384  | 38.2041059863839 |
|         | 43.844855336215  | 39.6609238036815 | 41.8799523546812 | 39.3709357615493 |
|         | 39.9777866059804 | 43.0919221375514 | 41.4860822396574 | 42.4607795638552 |
| RSPRY1  | 350.278532614563 | 316.327885002562 | 383.705244574204 |                  |
|         | 346.285308869994 | 409.811889288372 | 308.568617575909 | 280.402165030951 |
|         | 275.026256072452 | 261.081844108932 | 309.06234888929  | 361.158558609751 |
|         | 347.552309199761 |                  |                  |                  |
| RSRC1   | 100.765131355505 | 145.819204020818 | 86.4154945670734 | 94.4501786945034 |
|         | 121.023370640285 | 91.1271533616476 | 167.602045390279 | 157.281394920992 |
|         | 153.487141102615 | 56.057906531592  | 69.3645322033576 | 100.049462976601 |
| RSRC2   | 129.336439341458 | 111.166893747402 | 108.599492114105 | 122.316617618658 |
|         | 116.540209248478 | 132.223745961048 | 125.62281563325  | 118.783682318205 |
|         | 155.956315815754 | 142.291320727209 | 131.68956899407  | 148.944852825695 |
| RSU1    | 94.6130003107132 | 96.6359641162026 | 99.1502352565568 | 113.248260252658 |
|         | 75.4272782742534 | 274.994470779348 | 94.6130003107132 | 106.190104122745 |
|         | 80.958999459468  | 127.789065386943 | 124.350816245276 | 167.014274808063 |
| RTBDN   | 38.3360516835506 | 40.1989248349075 | 42.59352468383   | 38.7004513165111 |
|         | 41.467005949568  | 40.4779565600984 | 44.14228771963   | 40.4359177791566 |
|         | 38.9834959368496 | 37.6383530120621 | 38.6348619337445 | 39.8497227447888 |
| RTCD1   | 158.364437886751 | 168.561260174501 | 143.122201568705 | 133.610670717456 |
|         | 138.50445813694  | 105.890652858478 | 121.945468001236 | 133.626390404589 |
|         | 109.090304050495 | 71.193768715137  | 85.7732262204681 | 128.937837181433 |
| RTDR1   | 37.9387791625384 | 40.7952353240579 | 38.6727842796202 | 36.3604951341921 |
|         | 40.3452320167286 | 41.159706131351  | 39.1539892144371 | 43.0390857698452 |
|         | 42.1594905198929 | 40.7063426028871 | 39.5399188536544 | 36.449101775775  |
| RTEL1   | 48.4614401417022 | 45.9027267631224 | 46.5172622801553 | 42.1679276329916 |
|         | 45.9604707098953 | 45.9994850850293 | 53.4010079725504 | 42.157627240486  |
|         | 46.8873421271259 | 42.785429206422  | 43.4709415392696 | 44.0299389687796 |
| RTF1    | 62.6702927225656 | 59.0709442090059 | 47.7737810047679 | 57.4595416719581 |
|         | 62.3233491851723 | 55.1037284831588 | 69.3468840908665 | 59.220967994972  |
|         | 70.2541961995753 | 56.1912096308988 | 55.3942006156899 | 51.4308501933893 |
| RTKN    | 190.27040993548  | 74.2004711747326 | 59.6922302604696 | 51.880003367095  |
|         | 67.5047089908724 | 56.796621176582  | 118.771995863848 | 145.694779669933 |
|         | 62.0967404944031 | 63.5716064500377 | 61.776442749921  | 58.3882937676176 |
| RTKN2   | 42.9104454767916 | 38.9338521051669 | 44.5134109184888 | 40.0698728584484 |
|         | 45.9104478407175 | 34.6977013306396 | 49.3854238365325 | 44.9977782988116 |
|         | 58.0722340887264 | 41.9666541498638 | 41.9908237694988 | 43.8575940017119 |
| RTL1    | 39.9182914210537 | 39.7495102340049 | 39.4250105372135 | 38.5252456306656 |
|         | 40.3452320167286 | 39.7697110924474 | 39.0759686770589 | 38.8159908342801 |
|         | 38.6322728994674 | 38.3092241935352 | 38.8507804383261 | 39.5748670524951 |
| RTN1    | 49.7336769474446 | 52.2236479204029 | 54.9460876400605 | 113.148617122619 |
|         | 41.8806343997257 | 62.0056315405014 | 46.2478069975709 | 45.5581356216957 |
|         | 38.8507804383261 | 45.8505603625223 | 43.1931731665131 | 41.2437378488025 |
| RTN2    | 70.999734997491  | 64.2130157241811 | 63.6334154351075 | 87.7844808613265 |
|         | 82.8232026162231 | 89.7862835647016 | 63.646857186929  | 83.1143182398772 |
|         | 77.2778958631233 | 83.2240772671045 | 71.940968073473  | 87.3870406334559 |
| RTN3    | 74.5065528806984 | 66.6332042895961 | 76.5699943825825 | 138.436822676252 |
|         | 120.231435193839 | 118.614027673431 | 178.858202962948 | 140.961217055867 |
|         | 105.29989739819  | 114.657635596229 | 106.712703356565 | 124.903031106573 |
| RTN4    | 626.749986744506 | 424.539111965342 | 743.463635670141 | 583.915973546284 |
|         | 501.148339791372 | 590.709061039001 | 491.100053064936 | 763.947361966861 |
|         | 661.718946652592 | 942.247437385029 | 981.039763059681 | 1245.45371155527 |
| RTN4IP1 | 303.744307989358 | 71.7215348945466 | 99.2504397421242 |                  |
|         | 59.8102324370568 | 61.1216330559316 | 61.1022920882065 | 69.4677195088043 |

510.525676243746 104.409397223301 61.7502624458447 75.0237373605584  
75.6428949408034  
RTN4R 64.9367707455078 49.7363778831003 43.6670755115848 45.7397504535169  
57.0504111569238 50.0748292497578 54.4934782594218 58.3046521633424  
64.4098139218465 39.4710743516517 35.4386677371439 40.8681871019812  
RTN4RL1 36.3649677956953 43.2649781354792 39.7411455670172  
31.3142073726046 43.2484996523549 40.9506062495231 41.8315602975157  
35.9023742468744 39.3750969348308 45.5776159432079 43.4709415392696  
42.6758568421347  
RTN4RL2 41.3387790895716 40.148780650831 39.3709357615493  
51.5913529948887 50.5110359971301 47.7556758818053 44.9863726205428  
40.4359177791566 68.75304552302 45.3530683538086 43.844855336215  
39.7411455670172  
RTP1 36.0144420013819 34.2618170189676 40.1985790927248 43.1847628331565  
41.6806984441849 42.9695585740813 43.5627649099623 40.831207953647  
46.7760357462635 46.325232414659 48.9754340235127 42.8864415494484  
RTP2 36.3649677956953 44.2630383225933 43.5710871617107 34.1051821768421  
37.956732373465 39.7394181011603 44.4639405506967 39.0620487644635  
45.1899271235974 45.7911932481722 39.153226699662 49.1200355938198  
RTP3 33.6902293666089 35.4484652445078 39.0775870687758 38.4208429103799  
43.4544762830742 34.6977013306396 37.0564573649223 35.9023742468744  
41.7627910693483 33.0508421547252 39.153226699662 34.3409660445447  
RTP4 68.6627996695828 99.864496342189 99.0596863442346 65.7321440516177  
43.7517118200398 47.2927436772465 68.878562323012 49.5185112777773  
136.155022329495 67.6983931011126 71.1607965028029 60.2550788540864  
RTTN 109.649431670339 98.1433318215702 118.467231612638 123.022511916727  
96.332996264667 118.49449420132 131.39588569388 83.5767232665142  
126.404988409795 117.138945281875 116.938715935808 103.876328830067  
RUFY1 87.3342335690393 69.8505620106065 87.455991111513 96.5813769696577  
85.4960014582244 105.699748702315 77.6870769927325 73.9061211499986  
81.1416376689959 90.8550873130713 83.0316824964745 79.0249585610565  
RUFY2 47.4167233775693 46.9919960628953 52.5826607585468 44.8727287473605  
44.7829632472754 47.0027453663546 44.3989089534507 52.1132472786412  
58.5202558613566 55.0604256312495 49.409264781638 54.3344262267094  
RUFY3 61.8529316708431 50.6774883370457 47.0055981216687 51.1496769859102  
48.5544398725959 70.0470864733496 51.5967098638347 59.4674205670657  
54.1745577382276 65.5800543140431 65.2795701743446 67.8055281345443  
RUFY4 50.4872122867759 45.0115870036541 50.9010149857308 49.7350276169552  
48.6224651100733 46.6872654833579 54.0170817319522 50.9933795450314  
49.3780606970538 61.4569050766419 52.8489752025797 53.7442594289333  
RUNDC1 148.758736522703 175.550329937952 142.614006543733  
118.316810638061 139.847976281228 135.829530518199 156.061711961514  
139.49198349194 246.351606918353 198.742148437738 228.026217504784  
191.482692108417  
RUNDC2A 51.8781065691038 47.6914221838216 56.7776874358774  
61.2213001749372 45.6895223823001 58.7404123614695 51.1541843174981  
60.5571721986885 52.0583273941813 51.1169368198437 53.6895401581575  
46.1592873342534  
RUNDC2C 65.2125527940945 58.6519539856728 67.4811066936124  
93.6212502203405 50.2163892855092 64.9498081060676 65.1041577962151  
106.97432416825 59.0965219753805 91.4283821919125 92.3901719424121  
76.198032870201  
RUNDC3A 118.923419920947 39.1982470626863 39.5450079747895  
37.651298468202 41.7929491793697 32.771863438151 35.6056062164318

38.2782436497441 43.7630587657205 35.3849221682845 32.8881500803623  
36.9976231206067  
RUNDC3B 35.4287975493553 38.6414316877471 46.3411353377615  
40.3180310664156 45.2556760873335 57.0775902639215 38.2933870238743  
64.964255000378 64.9030399249327 56.9463858443402 63.0043412964216  
51.2318935933116  
RUNX1 161.817972012879 93.4180535865914 77.2218991550552 131.471030729546  
58.4383854340181 56.8875898013449 92.7427427543974 117.439175394651  
110.649342465555 115.468303687641 96.8185145589133 85.4420599474339  
RUNX1T1 45.3407340000202 43.563598399838 40.0436653463863  
43.6177016821274 42.8600932447813 56.6893078582471 40.6080890862339  
42.3224812939526 42.8496759570945 51.2729241080159 52.6631075917563  
46.3092131181856  
RUNX2 52.1589578279164 46.3635803515159 44.8225702956706 56.7351380543324  
50.7615314686244 41.9946838598688 43.5898425390297 50.0991178780329  
48.273999446798 41.4397539024976 42.2455707947223 52.1918130336397  
RUNX3 83.2737524877952 119.591054636527 76.7254010150417 289.975375372371  
59.2643906275025 61.7566103867825 63.928488869459 106.654782265295  
60.6266092582071 69.8941497035747 66.8842530423095 60.6441065119394  
RUSC1 716.754656773542 790.094848284547 1384.80615431656 354.086949676663  
934.226835873517 405.496884468464 905.76958446454 680.837950890159  
691.94603958547 698.595302020108 516.076634990003 524.047008889711  
RUSC2 52.310270746917 49.9547657591437 43.401782064778 53.593974682612  
40.9950639693255 99.7445419301229 42.7431359850339 39.3709357615493  
40.0403898620771 56.8201201798712 73.7873098190297 62.5447504571181  
RUTBC2 39.5676051939342 44.5884811528117 46.0727230219512  
47.8164193292842 44.5668141895992 44.5544727111028 40.6750540874299  
37.9837233601316 40.4997186069494 48.8623729374733 44.4688999098904  
43.0930293831497  
RUVBL1 122.924027019519 163.493389267264 166.25909484446  
108.868692628326 569.244038644604 200.351560652506 294.620463776036  
128.327641457403 134.300169542594 63.7836577144372 98.5609311953771  
85.9749634505846  
RUVBL2 175.362103430164 210.485586903711 216.03402309102  
106.398825125486 443.425400626341 191.955732544426 186.372887375058  
115.995213598177 303.818507395434 107.242476674629 127.949712300256  
135.92805172353  
RWDD1 554.551745559065 414.539381761279 532.981045084589 525.35784336478  
275.846698617064 990.431472174705 396.493831159481 403.92758879201  
342.058245939495 463.274973266895 495.453743436613 716.434968700383  
RWDD2A 96.3232257371077 104.305801811472 126.319731178054  
137.555275829874 57.1935729219207 85.5027511448958 77.2154078285418  
76.6094442444074 65.7321440516177 112.760972238512 76.2226219333049  
108.750364850147  
RWDD2B 66.8544766980562 62.4530276414691 86.2895084312264  
63.1604223919703 86.6854406823303 80.3805507705979 69.1414574152997  
61.5000955267432 83.9924889412802 75.9037617394486 75.8976034525022  
66.8026147385682  
RWDD3 69.3418521417182 62.1642339365777 65.1185966859561 52.6947911480086  
53.1884505015411 70.6691645786819 71.5249259772583 56.3560498705517  
60.6266092582071 65.429256309049 71.6849360818041 96.1710806345503  
RWDD4A 184.536327776767 163.66696652324 147.34358398245  
111.071209057746 254.322611819303 200.566335168667 165.606015336587

|         |                  |                  |                   |                  |
|---------|------------------|------------------|-------------------|------------------|
|         | 149.386774957393 | 156.382146982116 | 209.658186168638  | 199.181938253995 |
|         | 195.968119243879 |                  |                   |                  |
| RXFP1   | 37.7384958256497 | 37.1685072112618 | 34.806104801006   | 39.3750969348308 |
|         | 37.3508690072156 | 36.8059561571675 | 39.5496902678788  | 39.4710743516517 |
|         | 35.7973685350741 | 37.1275334308172 | 37.2892641289258  | 34.0382693188794 |
| RXFP3   | 50.4872122867759 | 41.159706131351  | 44.6032218589199  | 40.7481155008596 |
|         | 41.2740822675592 | 42.2577689927563 | 45.6042625176633  | 42.5435283762933 |
|         | 44.4395580493118 | 44.8997235283254 | 38.8507804383261  | 38.3291713594599 |
| RXFP4   | 34.4896350146096 | 39.0894172982439 | 42.2577689927563  | 37.5382094267692 |
|         | 39.9697332660833 | 41.3553369544097 | 40.5585676679482  | 35.4526946152955 |
|         | 40.2274522635576 | 44.8997235283254 | 39.7342718293432  | 42.6758568421347 |
| RXRA    | 566.77872642437  | 1147.19483787501 | 401.817698574441  | 556.728676214581 |
|         | 769.685677484067 | 463.527266972118 | 662.848386826617  | 533.820505121067 |
|         | 560.413725186282 | 1541.9572099378  | 879.708199333257  | 1045.20336057833 |
| RXRB    | 67.2437599548936 | 92.8951148347802 | 83.3826639718546  | 72.6824533717231 |
|         | 72.4060089486729 | 77.9085946827079 | 70.0567634568557  | 58.5406981871153 |
|         | 72.2527203451447 | 65.9189023794337 | 75.0704619826557  | 75.3271272345679 |
| RXRG    | 40.8163035350222 | 40.0527893189096 | 39.6037514046494  | 37.651298468202  |
|         | 42.3685136297603 | 42.5660695551615 | 42.7982502551634  | 40.4359177791566 |
|         | 43.6670755115848 | 40.0599807618105 | 37.92304440150891 | 42.5379139224668 |
| RY1     | 211.109957714241 | 194.703024752864 | 134.185571685143  | 183.77850568836  |
|         | 115.408418935236 | 241.901039109114 | 150.562062400737  | 204.68542226859  |
|         | 169.251790128723 | 131.258204302177 | 186.477689350702  | 199.776860110557 |
| RYBP    | 153.310447977094 | 281.906398109158 | 356.727720725014  | 469.553640187203 |
|         | 291.94914449218  | 344.44626908553  | 544.946796643478  | 338.164006403    |
|         | 250.244199415895 | 255.241295723095 | 663.372296297652  | 216.063990451376 |
| RYK     | 180.80065212092  | 303.93332785291  | 245.489660195494  | 128.300809076274 |
|         | 435.901460958456 | 359.628703006773 | 255.636379050741  | 203.559653641339 |
|         | 256.995917821765 | 248.691595276298 | 277.588692595406  | 421.611594456877 |
| RYR1    | 62.8091467605856 | 43.4667754607514 | 44.4311655729487  | 60.4646208319121 |
|         | 80.9160262677505 | 46.9515828775339 | 47.5963750520409  | 61.3077641493507 |
|         | 72.2120805585702 | 43.8943892311541 | 42.911855821602   | 47.0832527687464 |
| RYR2    | 40.0557788909923 | 39.6123051184545 | 41.0356368374708  | 43.3078542962968 |
|         | 44.0451487108213 | 49.1013967533186 | 44.9863726205428  | 41.5464765641928 |
|         | 41.1742244762318 | 49.8393069675192 | 45.8180710486329  | 48.9733758107788 |
| RYR3    | 44.7044140979108 | 44.0409178714232 | 35.3649449469275  | 46.4555908533915 |
|         | 42.7982502551634 | 89.5597629049747 | 45.4799270968969  | 45.642304356051  |
|         | 39.3750969348308 | 98.8595497262968 | 69.6097529955737  | 49.8253396161069 |
| S100A1  | 42.442231667357  | 45.7979032939211 | 48.2883694323339  |                  |
|         | 43.3078542962968 | 56.6951078698291 | 47.5733603903505  | 53.4921736109774 |
|         | 45.8669209716694 | 44.0519245668737 | 44.6918600441328  | 44.6286581923295 |
|         | 47.6040671292013 |                  |                   |                  |
| S100A10 | 4344.25847766877 | 1056.57081612661 | 1468.75291542154  |                  |
|         | 4235.59743465057 | 487.540800793233 | 3234.36469403715  | 1310.03307063841 |
|         | 1626.71747158994 | 1224.80240464583 | 2488.32876359853  | 1975.28674300761 |
|         | 4036.89580181979 |                  |                   |                  |
| S100A11 | 635.52621743309  | 786.57695312967  | 1618.92099084622  |                  |
|         | 867.856842601788 | 445.307046237791 | 310.461601607662  | 748.372940917543 |
|         | 1537.76265834076 | 979.468753716758 | 945.57360324722   | 915.936211119242 |
|         | 1154.6386362     |                  |                   |                  |
| S100A12 | 39.1590964332473 | 41.4508241771315 | 45.8844325913247  |                  |
|         | 97.2220312216969 | 43.3332476888305 | 67.8208976798364  | 81.2136969156029 |
|         | 55.1933004802607 | 39.5806465938526 | 41.6373771565199  | 40.4504608195666 |
|         | 46.3411353377615 |                  |                   |                  |

S100A13 137.605565493336 83.247335725921 101.020328028769  
101.940584589951 108.323780226301 186.64040927334 89.646647563364  
200.524777333743 94.7832678603291 136.859309317164 113.46454061183  
119.872031126474

S100A14 58.0139597055449 30.6802399384205 49.3000844711116  
34.2080003860523 65.3019328668633 48.5835484742456 38.4005795891396  
95.5822406197756 104.626873082138 52.8928296360463 39.3667161654772  
59.7999569757275

S100A16 762.855719373733 199.123340814127 563.927521628693  
171.920449949522 619.950241162173 217.743953847269 375.354746298695  
1202.11455437028 938.151864971251 254.920345078558 199.294913752704  
207.380865650247

S100A1L 41.0608773166058 46.3370338074996 41.2365089689635  
39.2336402665402 41.6340461942423 44.1350486752012 40.3302268293707  
42.0494116081998 39.5411918095433 45.9004543328976 44.6834648302383  
41.8200132437731

S100A2 56.4553747079294 61.6219790276408 241.51647940043  
71.1583251698218 406.500583302121 102.711934290382 81.3082994649699  
118.341308125578 230.486681581762 105.598516887691 120.980558571109  
91.8935361535002

S100A3 57.8765910878975 57.0082102559228 143.973063517706  
93.9228336493696 128.38299874379 55.3202238943712 57.7805922926828  
71.1607965028029 55.3122077514658 70.2565873027242 59.7269454048338  
43.0930293831497

S100A4 3707.73750609316 5479.94045861143 11410.3307451176  
3329.68037676265 502.67939538729 3379.67054115975 1679.12630849964  
500.549865625701 189.451890957713 4093.70002166179 2903.00880209344  
3602.30252142918

S100A5 41.3387790895716 47.765848710116 34.3633615460307  
36.890925044696 38.8456942580061 43.6670755115848 40.5585676679482  
40.3357777530419 41.5635499110307 37.3179578037963 41.3553369544097  
37.7526485343328

S100A6 1343.66876893729 3190.0108307463 5354.58328030315  
1465.98242110921 2903.00880209344 1776.78784112613 2779.37660132136  
2164.51925341969 2944.3433949897 3001.25236839028 2697.96877833185  
3153.71394627237

S100A7 55.3153799233744 51.7983110178095 86.4154945670734  
48.665578118898 36.7356360093603 37.2686490268265 57.1070449050465  
73.746472097049 48.0163377492228 40.4136535208406 38.3684202018524  
40.1700117452801

S100A7A 40.7609952437622 44.2630383225933 106.599578931817  
51.5913529948887 41.1868052124344 41.159706131351 63.3924515518667  
53.7378346199838 44.5303781239209 42.6793753550854 42.911855821602  
44.2527566343661

S100A7L2 38.385865183581 42.4493032770053 43.6670755115848  
39.5637454855233 45.0693869004277 46.1974343793412 42.9803717121865  
45.063792968927 43.1180113655693 48.1392888470269 41.7651272076914  
44.1063440402552

S100A8 2911.10227993347 401.679080975109 3055.1209535841  
5047.91205452316 386.00975855841 1487.80306986156 3520.7579823657  
3618.78958408675 346.438778257772 172.317945975659 102.212684008752  
529.650395907046

S100A9 6749.14636741447 1749.06320703181 6483.09366281532  
10235.3288951482 1089.08276262641 2721.97551918611 13656.2581082905

|         |                  |                  |                  |                  |
|---------|------------------|------------------|------------------|------------------|
|         | 9326.9018948838  | 882.105892529265 | 171.957278903005 | 132.689951767479 |
|         | 844.431085166353 |                  |                  |                  |
| S100B   | 42.2455707947223 | 39.2907645923217 | 37.0642268327439 | 39.3750969348308 |
|         | 46.0043807840705 | 37.9003288112261 | 39.7576136507593 | 39.3709357615493 |
|         | 44.1519466943185 | 41.1222709786153 | 35.9563099719284 | 39.4490233720848 |
| S100G   | 36.2496364442264 | 31.498275130159  | 37.4642807402741 | 38.8495095797881 |
|         | 40.8873907150245 | 40.4359177791566 | 48.6395795163502 | 40.6171774724171 |
|         | 37.6383530120621 | 38.1042454705119 | 41.5421429082231 | 40.0557788909923 |
| S100P   | 3253.86278287661 | 12456.731302703  | 13656.2581082905 | 767.489657259345 |
|         | 4148.07163380544 | 1001.99175009124 | 3690.00752647453 | 6606.35767508139 |
|         | 7393.77508374057 | 9181.13240708506 | 7323.77427153966 | 9488.06491634484 |
| S100PBP | 54.9846116067144 | 54.8690480892602 | 61.3005673792118 |                  |
|         | 53.3039668850879 | 69.3883443059504 | 56.5763837326326 | 66.3775183389603 |
|         | 52.4570161184697 | 58.3015837845113 | 59.7298493146287 | 56.0183341691645 |
|         | 61.3149617644002 |                  |                  |                  |
| S100Z   | 41.7397731376692 | 39.8455060654531 | 38.6414316877471 | 41.9620007529243 |
|         | 44.2607789091176 | 40.3946758935842 | 42.7065584433947 | 37.6058760248614 |
|         | 42.357910063876  | 41.7405682794166 | 40.2649309204478 | 39.2839132447749 |
| S1PR2   | 43.844855336215  | 45.0905928998779 | 44.1452943804044 | 46.0228732507872 |
|         | 42.269054475455  | 41.8613406887824 | 39.4600924554505 | 39.9576138799997 |
|         | 45.7452456977857 | 45.4614234442527 | 40.6373400186325 | 37.6557714476853 |
| S1PR3   | 123.739272396278 | 68.8570376191283 | 79.7733480606334 | 189.650905999631 |
|         | 113.612874206329 | 164.722166245312 | 110.223625398261 | 107.576033955049 |
|         | 63.3694113050568 | 67.6169355376864 | 83.9236799134394 | 101.888001006345 |
| S1PR4   | 49.540449125788  | 74.4696354388511 | 60.8942621888353 | 205.876395674271 |
|         | 49.7235523248653 | 62.3497263884167 | 69.9214859673839 | 42.0494116081998 |
|         | 46.0106098064475 | 101.954354107731 | 60.5608545741456 | 49.6629259325705 |
| S1PR5   | 60.2547250212462 | 68.8195659637992 | 109.090304050495 | 47.2009420656854 |
|         | 123.261654256925 | 53.7442594289333 | 75.5830548489892 | 46.1673159982664 |
|         | 89.2056902297352 | 104.8505815954   | 155.492099076744 | 200.059649606808 |
| SAA1    | 45.3260376358066 | 46.7846562208685 | 47.1719672813096 | 40.9157352260901 |
|         | 43.4997018727878 | 57.7125861123012 | 49.8865955311391 | 42.7881985796277 |
|         | 41.0381860307445 | 41.7405682794166 | 38.6322728994674 | 39.7938220956242 |
| SAA2    | 40.148780650831  | 39.8695929627783 | 42.7303139017786 | 36.7892997857376 |
|         | 39.4693871570028 | 46.0364000143537 | 38.6243997507646 | 40.6171774724171 |
|         | 42.357910063876  | 39.3698811593364 | 37.2018803984555 | 41.1554481567603 |
| SAA4    | 35.5179217192467 | 42.2577689927563 | 34.6977013306396 | 38.4208429103799 |
|         | 43.4544762830742 | 36.9060997041453 | 51.9421032049606 | 39.1652965788406 |
|         | 33.2715481910159 | 41.0057887014368 | 34.266241549578  | 41.7575097298927 |
| SAAL1   | 120.426087248804 | 218.400420636994 | 213.590067519021 | 139.768680518677 |
|         | 267.565744773928 | 142.444971930298 | 179.994715581707 | 182.80711310964  |
|         | 257.662291702982 | 154.149426842591 | 161.793366042179 | 177.236964110663 |
| SAC     | 43.0001432913058 | 42.0709558258414 | 36.5474283500601 | 36.7892997857376 |
|         | 38.2496050953547 | 35.2067831864574 | 41.3594868055879 | 45.0972184964705 |
|         | 37.4540772310118 | 39.2623423164488 | 36.7283081422707 | 42.1537476443423 |
| SAC3D1  | 290.535354193244 | 137.658868649032 | 149.639066617945 |                  |
|         | 153.364107550338 | 482.238595345574 | 176.224645007435 | 509.463928291526 |
|         | 201.427008153788 | 256.258779434769 | 143.706880936186 | 145.335751135441 |
|         | 124.310823604006 |                  |                  |                  |
| SACM1L  | 74.4565795414712 | 96.6359641162026 | 96.3741876853801 |                  |
|         | 107.478392667404 | 126.204310123186 | 119.647202975116 | 97.299696284253  |
|         | 118.186590679218 | 94.2275161759277 | 181.029293055674 | 116.938715935808 |
|         | 149.639066617945 |                  |                  |                  |

SACS 43.9309845324767 38.3322849790657 39.2388980107385 44.0991023527481  
39.3999056968598 41.2098211956301 41.5817737564592 40.5158867964016  
37.241386734757 45.6355219961567 42.1537476443423 50.7903824729818  
SAE1 2280.42953098693 1573.61108703981 1271.62760896761 924.316085565917  
2966.53151444114 1618.92099084622 2164.51925341969 2257.78227736778  
2357.96534075689 2146.1548633579 1780.14552702126 1557.42399344934  
SAFB 239.590143292142 319.092568066532 327.631923082696 259.812381486915  
497.591040004541 328.908952548641 391.187784616808 286.927016665685  
385.36587480414 316.548339196872 325.224254365274 271.813877560354  
SAFB2 170.307603160524 268.54298415337 220.621142396402 206.072527867605  
431.353025968649 268.936151471133 213.380798420955 205.898127436939  
233.201890340549 249.855746700674 265.860397918913 229.26498093497  
SAG 37.1485601150873 41.9894412416874 34.806104801006 44.7980740332174  
42.269054475455 41.6590564937735 33.8558232866797 42.6450179841129  
38.5252456306656 43.401782064778 37.9946685306274 36.449101775775  
SAGE1 43.1805016690297 38.3322849790657 43.2721716572958 42.5664883002833  
42.4864576619427 41.1090481599939 46.7100796279384 45.063792968927  
56.4616264389212 46.0119912782855 43.0971787292711 41.0657892043496  
SALL1 37.3463875295726 38.8336427948187 41.2365089689635 31.6357375926754  
42.4864576619427 33.1602385985469 34.4570158133896 35.9023742468744  
42.8036731479932 39.2623423164488 44.2925355984056 36.1647506311964  
SALL2 122.136867360309 64.6970918899831 58.8188963227059 55.4180794172794  
97.4137766910365 123.077231445204 86.2118355769367 74.383456365584  
87.8724689898823 185.812520354849 129.592927998658 124.998771394658  
SALL3 98.0307965290686 82.6602736441839 108.512469038407 135.718484174661  
100.205124008648 113.218291314173 98.403191200835 92.681224908389  
102.771611905219 101.197890058764 90.1284518302601 94.9831937714438  
SALL4 97.7140868175135 41.0678614026819 37.2838080935695 43.4410741327254  
89.6313467455698 45.0882356578404 65.8986841086198 46.9986083378817  
54.998510746958 38.4187686307607 45.4799270968969 46.1592873342534  
SAMD1 66.5500089527674 58.6249721386149 79.1649337367773 57.0629653735694  
74.9661773375536 57.013135787334 69.779139490544 65.5820437889838  
93.7090094630558 69.5080454202415 68.5370732645926 55.4635297192076  
SAMD10 46.7293238583888 52.683711208052 64.3312319756553  
38.2041059863839 43.4544762830742 44.7804080899431 48.0283573444179  
44.0390019242862 61.0094935318105 55.0016608333828 57.5430365699386  
50.2163892855092  
SAMD11 53.0290605707162 54.3303422997961 43.5420658412177  
46.8249967544573 43.844855336215 54.5222652584532 40.7910160811527  
49.7309743973184 49.1399035787209 50.7237607003817 47.9942520395434  
49.6203214143464  
SAMD12 40.5654775358427 39.1982470626863 35.6139301508335  
34.3595588146954 39.5595233162192 40.1428591998404 39.1539892144371  
36.9355798143571 41.3803269429468 43.844855336215 36.0481934423077  
46.5650556481721  
SAMD13 46.7293238583888 51.0175677516029 46.9040704638073  
41.4273122914951 51.2525124735102 40.7616966228404 46.8613212048981  
46.5717043290731 45.6582729799009 48.6124127998952 49.4593570700221  
48.27609330316  
SAMD14 56.6951078698291 53.6429962450784 54.2670850492947  
52.5307002738469 53.3086645804786 51.702461863489 41.253645578517  
47.5950227477807 44.8997235283254 55.9283039581662 46.1673159982664  
44.5432192783161



SAMD3 41.9918605927928 43.3972849968032 42.8723769353017 44.088343150308  
40.8190897400999 41.8883771034267 38.9726162415183 41.0752399035779  
37.4791960442289 41.5696109388121 41.2267153672559 40.3316153483289  
SAMD4A 66.8544766980562 33.4316681623175 48.4890615340603  
47.481302504066 46.7508829977587 47.5733603903505 47.4439407315335  
43.5544347011646 58.0722340887264 44.2580151149956 42.2618615571566  
51.3244198342335  
SAMD4B 98.7446830481164 98.9017950719795 84.3755392205436  
86.9274372004388 140.598583034034 104.914715637173 143.6667863386  
138.783011990219 84.3526980051279 125.114613377133 113.612874206329  
112.316483867372  
SAMD5 37.7384958256497 47.6229101519945 52.8041782638549 40.7481155008596  
41.0885562160946 40.1428591998404 40.4359177791566 39.7509165247419  
42.992884918158 60.6266092582071 64.1267046511632 50.8442982601142  
SAMD6 45.334106390212 45.1694246393676 43.5710871617107 43.8002456102021  
42.8510579683751 41.2567470068038 41.0871827071116 42.3110002461296  
41.2870505273664 39.6719190054379 46.6856047520579 45.1735152121056  
SAMD7 42.1537476443423 39.2907645923217 45.5883690965192 44.265834798964  
42.6022652963326 38.7340969861754 40.0052661202207 45.2806199505029  
37.9273653326866 47.1001757441025 45.1432412071268 45.7562276914441  
SAMD8 42.8036731479932 47.6229101519945 43.0016969050339 43.5627649099623  
52.6922486991742 43.3785777889265 39.3585350448719 46.695848687694  
55.5751438859404 41.7405682794166 40.547835538778 47.7962548556026  
SAMD9 138.26207427245 186.002828997122 114.533239859288 204.774090707986  
49.5666074434383 81.9983163893373 88.3335649692467 134.664025291418  
166.45998863285 96.3495443565738 82.5225075943931 70.8546350449171  
SAMD9L 93.5982028088194 100.271925566074 100.824660338235  
156.276838862671 54.1225249245036 86.3888090084564 56.6537562775715  
74.9541456286637 79.9391673512018 91.6713614282714 74.9541456286637  
64.9418945936106  
SAMHD1 43.5710871617107 47.4740726032707 44.0451487108213  
46.1673159982664 46.9906120932727 51.294537308199 45.7452456977857  
44.6107027295193 40.8970401536578 44.571915452417 46.1673159982664  
48.9733758107788  
SAMM50 582.017297217368 485.698327133705 573.613497159192  
441.5479786095 1359.9708539999 552.860979481958 466.074595343541  
642.211963248041 606.276674926567 543.640122689871 552.860979481958  
384.080719411412  
SAMSN1 60.2547250212462 60.6779753362314 67.4811066936124  
1016.13142851085 54.0126916508417 100.802977734227 84.1780237893807  
64.5257016285499 42.3138951003676 43.4885245598939 40.7725311293918  
52.4992300612807  
SAP130 161.7095047889 141.055218279065 168.7696164772  
123.978615472736 156.976072444343 131.319040057576 121.195506364658  
130.058147569795 193.468773556057 117.138945281875 120.289145237975  
132.036058401203  
SAP18 96.4971762611189 95.0738959950301 83.955786676926 91.7068354379889  
82.9322141700549 373.172504097546 92.6545309624315 100.813818453306  
116.694275999729 236.10027586633 219.134220280612 250.040637073537  
SAP30 124.71462125633 105.446338599737 87.7652813158198 245.660544821992  
79.271901834289 200.986069552443 165.606015336587 94.4618437533343  
145.14768503072 86.3374157614394 82.8205269728224 110.52925781809  
SAP30BP 98.4084364053686 59.3406363431414 70.2577825186943  
78.7450149191851 88.2427413480277 88.1068080491008 115.087963545095

|        |                  |                  |                  |                  |
|--------|------------------|------------------|------------------|------------------|
|        | 102.085154509866 | 93.6124140212565 | 124.915754138992 | 102.706563820232 |
|        | 85.0113628886031 |                  |                  |                  |
| SAP30L | 132.257197568848 | 93.8968899420039 | 111.397578350396 |                  |
|        | 82.0292880742189 | 130.184962393833 | 93.1067450332473 | 133.720493104769 |
|        | 122.143519601825 | 117.976703022492 | 92.804679821289  | 89.737418965763  |
|        | 112.202543937743 |                  |                  |                  |
| SAPS1  | 79.2665546280232 | 96.8240908274121 | 96.577572948724  | 118.49449420132  |
|        | 121.552188287725 | 93.9228336493696 | 116.913991315353 | 116.275899706695 |
|        | 171.5709313654   | 111.511934617893 | 104.313754953569 | 96.4740168904128 |
| SAPS2  | 63.815361479982  | 61.5922826482868 | 84.8193235226936 | 105.850715599198 |
|        | 65.4493288628375 | 66.1839382171693 | 58.1734393141894 | 71.4356132400211 |
|        | 53.5224822626949 | 83.4033736999037 | 82.1225676987279 | 71.1163541406788 |
| SAPS3  | 168.640033281185 | 244.089971761037 | 273.231509963261 | 235.544416908354 |
|        | 224.373975368936 | 236.374695859748 | 291.327030793085 | 198.432987946699 |
|        | 351.188432232165 | 346.924074555334 | 328.855843739232 | 235.294634126766 |
| SAR1A  | 130.703767898434 | 111.880226272362 | 81.0295607064541 | 148.871702513875 |
|        | 76.1293960715431 | 108.246687420741 | 105.382126899524 | 94.6432868887401 |
|        | 152.942332679485 | 138.292681458047 | 108.945545005203 | 152.612579631539 |
| SAR1B  | 151.848243044839 | 122.368552598681 | 158.862722884436 | 209.099378471892 |
|        | 125.661351053514 | 100.548557273012 | 121.650910373947 | 222.453547273598 |
|        | 225.827961496781 | 102.706563820232 | 116.441764463618 | 185.079035617027 |
| SAR1P3 | 39.5676051939342 | 42.7775752471711 | 40.4070046183108 |                  |
|        | 37.4223289687135 | 37.3508690072156 | 47.5733603903505 | 39.1539892144371 |
|        | 37.7612949798895 | 43.1805016690297 | 39.0648733099061 | 33.1645364749371 |
|        | 37.7526485343328 |                  |                  |                  |
| SARDH  | 42.1537476443423 | 45.2556760873335 | 43.401782064778  | 41.5464765641928 |
|        | 41.7929491793697 | 43.5752393599169 | 37.7136011474903 | 41.5464765641928 |
|        | 39.2809305246091 | 47.7180816682562 | 45.5707650534259 | 43.6753843488695 |
| SARM1  | 57.6913861717513 | 64.1607001437806 | 46.3411353377615 | 48.856176220627  |
|        | 59.6922302604696 | 71.2787833369055 | 79.4485571328293 | 90.716460692818  |
|        | 50.2223403889892 | 70.9702772728923 | 60.8662233098324 | 56.361708620372  |
| SARS   | 135.737771384104 | 111.581224629293 | 105.965906809429 | 103.349712762251 |
|        | 110.411217828763 | 168.655833116537 | 111.367789538268 | 120.142759111608 |
|        | 150.685575301101 | 103.385447205588 | 124.986782737446 | 153.153205095999 |
| SARS2  | 95.8734933265537 | 121.613731804111 | 122.748811531184 | 56.4578213622965 |
|        | 186.395673402867 | 76.889690218685  | 198.15553991394  | 110.869341159607 |
|        | 178.592741163095 | 181.545493080363 | 178.624349589089 | 130.455608913636 |
| SART1  | 38.2083710281545 | 43.683792219729  | 50.1860191642359 | 46.8954576545929 |
|        | 46.3150221024046 | 45.1873487463472 | 49.1067959632109 | 44.5029690493211 |
|        | 43.3744503319109 | 46.7646877499666 | 50.3876754565799 | 44.5432192783161 |
| SART3  | 47.2862299990938 | 48.6447083765118 | 50.2869791217819 | 45.5869891570251 |
|        | 49.5666074434383 | 40.8634043028528 | 53.7423898357583 | 44.8997235283254 |
|        | 56.2441895183416 | 58.3813211109331 | 50.9815930710768 | 54.6659845741133 |
| SASH1  | 156.088284999883 | 220.167309646966 | 211.279069257808 | 139.554519110944 |
|        | 186.195424728755 | 230.649032296928 | 136.686164935569 | 121.650910373947 |
|        | 153.626578526803 | 254.199076651191 | 251.027270265657 | 249.37112382902  |
| SASH3  | 73.1931742801095 | 71.4197504261453 | 68.7091708087448 | 343.892794667047 |
|        | 47.3172462673426 | 56.4819802857598 | 58.2315917325629 | 70.2541961995753 |
|        | 45.0017158586743 | 62.5036823572932 | 62.0404348860702 | 52.1186591838715 |
| SASS6  | 66.2662667937952 | 52.1967540852276 | 53.6837370963602 | 56.9909890164687 |
|        | 66.0411740221276 | 49.7149784386993 | 57.814768075007  | 58.8477194579185 |
|        | 64.3425836997629 | 52.4887473044594 | 47.4964755141472 | 52.4992300612807 |

|        |                  |                  |                  |                  |
|--------|------------------|------------------|------------------|------------------|
| SAT1   | 5074.07305640514 | 1408.59798540643 | 2456.86796652313 | 9852.7965902602  |
|        | 1296.28036613191 | 1426.87261062373 | 4048.33132153903 | 2803.11698341125 |
|        | 912.757335169259 | 446.37035118289  | 556.092573451208 | 1058.61208471961 |
| SAT2   | 258.851412005402 | 142.731630650904 | 144.515737827731 | 157.885718433312 |
|        | 168.67163443217  | 170.223657280542 | 166.33117014492  | 190.375732394043 |
|        | 111.397578350396 | 233.96534264787  | 182.685579297058 | 169.920726825854 |
| SATB1  | 45.6517320730042 | 48.9899488302637 | 43.4709415392696 | 46.7577982595088 |
|        | 47.4548471240051 | 57.8944021095265 | 58.0969258817391 | 83.0497574039035 |
|        | 49.2879849674517 | 54.4825201506931 | 63.2684764441521 | 46.8129509799753 |
| SATB2  | 109.889322825648 | 48.3699741879723 | 50.3950981988762 | 53.2046867327331 |
|        | 46.9906120932727 | 44.7804080899431 | 37.830876898596  | 46.7980335276155 |
|        | 62.4776210012906 | 68.6788460999238 | 63.1566669782858 | 60.1837189855762 |
| SATL1  | 35.1307934330047 | 45.0115870036541 | 40.5734458834617 | 39.2780515621926 |
|        | 42.1650127805175 | 43.7630587657205 | 37.6036146841933 | 37.7612949798895 |
|        | 47.1744296124496 | 44.6918600441328 | 45.8180710486329 | 45.5800840647989 |
| SAV1   | 66.8544766980562 | 53.812632592983  | 57.8111054584154 | 70.2541961995753 |
|        | 51.940083408061  | 72.0674952635945 | 53.4921736109774 | 69.7729022157455 |
|        | 64.1267046511632 | 51.9547984751408 | 58.8188963227059 | 67.4197263416701 |
| SBDS   | 87.799979434508  | 101.131391476546 | 89.9650488563894 | 84.6435656850129 |
|        | 105.945216149549 | 213.140641182603 | 76.6094442444074 | 107.576033955049 |
|        | 117.408885431274 | 103.607345835114 | 122.052907748249 | 173.582309251499 |
| SBDSP  | 91.1363393944977 | 103.376225272425 | 101.935321521672 | 96.4913003384143 |
|        | 126.360723656793 | 319.408264906288 | 68.878562323012  | 61.8187341713197 |
|        | 90.3485862002091 | 63.6767189846426 | 86.0100701849272 | 173.856274004533 |
| SBF1   | 218.552143403657 | 335.569876624791 | 362.506098778318 | 192.41551362197  |
|        | 224.14182624489  | 197.569816397993 | 163.011116329807 | 179.47783529     |
|        | 143.399636653204 | 159.727829541783 | 151.575914903116 | 152.898843315675 |
| SBF2   | 60.0141692793298 | 62.1642339365777 | 65.2670315837785 | 60.620259884953  |
|        | 49.5136713986758 | 72.6182747525443 | 43.8835874380262 | 46.7508829977587 |
|        | 66.2978052628661 | 70.7003843117511 | 56.6884575165011 | 77.5622369733469 |
| SBK1   | 187.002948435359 | 83.7739049195868 | 46.018783037416  | 42.3019729951347 |
|        | 216.063990451376 | 57.7684424138019 | 165.751590932267 | 190.487609390723 |
|        | 48.0563448184655 | 42.4301183791899 | 39.9519547348106 | 41.809704036355  |
| SBNO1  | 43.1805016690297 | 47.6229101519945 | 42.640829914102  | 42.1273928203021 |
|        | 38.2496050953547 | 49.7458652239071 | 38.4005795891396 | 41.1575777497576 |
|        | 50.4974478884077 | 39.9948390976317 | 46.0905079010237 | 43.4709415392696 |
| SBNO2  | 134.869029698594 | 115.98265270452  | 105.204861495017 | 238.338646661062 |
|        | 123.674164545425 | 104.80882886573  | 120.231435193839 | 158.613823276652 |
|        | 119.700522283289 | 66.7299966077909 | 79.7691160370015 | 109.748417117462 |
| SBSN   | 39.266565827316  | 46.5650556481721 | 43.4709415392696 | 57.0629653735694 |
|        | 53.1884505015411 | 47.7556758818053 | 44.4639405506967 | 43.3262148375525 |
|        | 40.5912213523345 | 35.0668743708816 | 38.745552403895  | 46.1592873342534 |
| SC4MOL | 125.321349772971 | 115.048869605875 | 150.43149196048  |                  |
|        | 98.1433318215702 | 128.532373805894 | 67.4018925617901 | 210.255784687052 |
|        | 140.030757545662 | 240.731386634957 | 74.9601612417104 | 106.809028844031 |
|        | 150.875092086496 |                  |                  |                  |
| SC5DL  | 244.343381048643 | 349.371668774717 | 898.114119553014 | 314.281125546552 |
|        | 329.978705095448 | 243.672418126374 | 311.301613620475 | 481.905052451245 |
|        | 330.550018306903 | 613.914396149629 | 635.52621743309  | 557.717744882602 |
| SC65   | 236.10027586633  | 83.7019398654324 | 80.0183739952818 | 94.7283425282671 |
|        | 296.842555066902 | 98.2843999216669 | 132.903804194161 | 124.76401857899  |
|        | 131.195005779516 | 87.5967418612698 | 99.8063480813138 | 90.2425981161833 |

SCAF1 48.7646976789783 51.119812302881 47.9035532886869 45.8844325913247  
62.6860949544223 46.574682061365 41.5817737564592 54.720204938924  
55.3122077514658 49.8393069675192 58.0800636554122 51.5741598315033  
SCAMP1 268.419751472464 448.383843915421 395.298033031033  
247.676607756929 384.992066112903 283.951419701286 357.762505796238  
344.578407722941 396.355023788839 650.328627263899 468.477585169219  
463.022816882856  
SCAMP2 66.4399491500833 62.6236991757723 62.9313387640547  
117.228320608065 66.7426485694967 73.688423848106 73.8313212063649  
63.9110569727542 73.4122412764173 84.4349803529132 63.664265793911  
65.2125527940945  
SCAMP3 317.560970617018 287.363928615517 422.474427987338  
286.538414026118 448.196293409768 216.45007990575 362.196116025799  
331.591589534469 345.084002073846 325.275883498219 352.600793906035  
224.827414462257  
SCAMP4 72.4094549259929 74.9956591643367 68.4720753153522  
68.0471049167726 90.8335894699136 88.4695322145032 74.5591290353333  
61.3864512710242 80.8728961146267 85.8795177524168 94.8036856848998  
85.1981126713031  
SCAMP5 61.9504984796308 102.926945888985 57.1226931773006  
103.349712762251 68.9766943946607 53.7442594289333 93.3897477314201  
144.771861156788 63.3694113050568 102.490465676619 71.2370255410834  
85.6038071277319  
SCAND1 326.357036514613 375.529704925121 278.697914107208  
281.141138830497 390.978292094212 243.403622361932 686.154904023493  
255.636379050741 405.496884468464 171.386815652277 224.60637398191  
169.001200403896  
SCAND2 45.3407340000202 47.6667014835128 45.6517320730042  
43.6039443285137 47.8594286145357 45.6745730520715 46.9157261716384  
46.9598474201212 47.494999378108 51.5190073606378 47.6534909074889  
50.0571060701893  
SCAND3 37.9762510584485 50.8460732110055 44.3648993568405  
36.1102444571522 61.0468099710416 42.357910063876 56.6975067996989  
56.9299697426319 46.2718838939055 44.1861590259178 44.3440839686558  
45.223075311113  
SCAP 245.996655628334 421.146145642412 455.898996745515 238.510952165358  
934.226835873517 295.430709655678 885.224377292125 1097.92519921873  
388.132295362791 398.641868389511 355.319959025243 337.259932087655  
SCAPER 58.9201382292404 66.3904351698776 55.094385444315  
66.7750249658122 50.7615314686244 97.7114610828769 55.0897019602305  
84.607833108004 66.9499465764301 85.1950626054282 76.5505585423421  
84.8808332740321  
SCARA3 49.9419897484381 45.0495216395115 46.4218877301188  
48.5905518770847 48.6707521528908 90.8335894699136 44.1350486752012  
45.3872406432794 54.7033747046992 84.9863403576284 84.3755392205436  
64.830448408529  
SCARA5 34.2180669723984 54.5374188496807 41.8751578329365  
57.8277957325085 40.3452320167286 1053.67279913417 35.6056062164318  
51.2623287419357 34.4716904283753 530.853153115366 422.474427987338  
540.304257899761  
SCARB1 170.450752247109 120.001312008518 155.492099076744  
235.075347885884 305.554059609771 160.336517310154 117.072965367702  
102.818879165949 386.934057829091 106.219480656782 111.071209057746  
87.5759422500374

SCARB2 3343.07293372655 1676.22158135012 1813.65521720537  
1213.3477481374 1125.81685334899 1378.37754822734 986.40790007743  
2689.80835574654 1501.67042548971 2598.78910128081 2865.25344854768  
1864.63057767867

SCARF1 39.8234920704779 41.8073910693411 42.157627240486  
45.1151758109609 38.3561682218911 40.8091178323174 37.9946685306274  
37.6557714476853 38.9834959368496 46.4944619663072 41.0808257270221  
42.8864415494484

SCARF2 78.2644076847509 51.119812302881 45.6989664108554  
54.5125550937898 47.0954207417646 54.9579490132255 40.7376840028647  
46.5421017969405 38.5252456306656 40.6022003765153 48.9906383294199  
48.8670821164567

SCARNA15 40.0557788909923 37.8217989841918 40.301483914446  
39.6292788039793 37.5556299264699 35.7034203372528 38.5066108855005  
40.7311497914871 35.3227485563945 40.1179210534118 38.3684202018524  
41.3481355128089

SCARNA9 57.934905173625 58.8281931439093 54.6051538001037  
116.122324921267 51.5888395924843 56.7429967489965 63.1604223919703  
74.0831311663524 72.6675345946258 101.075733475972 64.898351831341  
45.2783024981315

SCCPDH 128.374733248762 99.7361599442168 157.082769443568  
61.4518104624768 142.614006543733 88.3503153240018 130.140604559757  
78.7543199947688 145.01315947031 176.506718222092 163.067962559455  
153.673219460519

SCD 1076.05074395483 935.815928529014 938.151864971251 790.786577596971  
1398.21942794938 246.500690127803 1478.26733379357 445.421601813221  
4128.92158369026 546.548431253433 463.527266972118 520.415257194417

SCD5 54.0170817319522 49.1855323567224 42.7303139017786 50.2950101030503  
68.6889514573956 67.1067574196203 49.540449125788 52.6960621424156  
55.5086026637973 55.8579198774476 55.1531662914834 57.445796273665

SCEL 41.1523487516364 38.2835812177457 41.554942319225 40.1249533205858  
45.402658694824 39.3565586789274 42.3194600586894 42.5435283762933  
38.6510172759977 40.1179210534118 37.6484782516569 41.0226232127351

SCFD1 157.356512456687 278.303493506139 178.559242961756 217.127708207497  
156.822939275312 206.234676343851 172.206923437536 173.944080519006  
211.669885749793 172.929453277107 167.49597550111 184.201497822259

SCFD2 35.6111578834671 38.3322849790657 38.0452862258803 39.5050383901884  
43.5544347011646 34.2773859804062 40.6750540874299 46.9986083378817  
40.4220196471124 44.3648993568405 46.824299585607 47.1060577218993

SCG2 59.3923286524971 39.5050383901884 38.9790184198145 54.6089451252049  
45.4751076037511 41.4508241771315 42.2577689927563 40.931294690669  
38.3418933808844 35.0668743708816 34.5633623842083 47.9566297250148

SCG3 39.8662795144616 41.6069493017095 42.2577689927563 41.4273122914951  
34.4853678149429 47.8636003588181 46.0817481577316 39.8965727231863  
47.27543600687 42.2614524730856 45.6348103033479 43.9366081640576

SCG5 110.487281983469 54.8979897528792 53.6837370963602 156.150710793563  
105.187381311145 55.540888910486 62.0404348860702 105.63434679637  
46.7760357462635 47.611018474151 45.1432412071268 47.5025821041537

SCGB1A1 43.5710871617107 41.6466169548846 48.2883694323339  
42.6913548400127 40.7779767565889 40.4359177791566 41.706879587091  
39.853866204927 46.6944238390932 42.1622837416589 39.153226699662  
38.3291713594599

SCGB1C1 38.2083710281545 40.0527893189096 41.6079958749402  
44.6905691366696 36.2048942610546 41.0582900711341 43.0930293831497

43.7396619462033 41.9635525160083 42.6793753550854 41.2598458726002  
38.9496515344837  
SCGB1D1 44.0328992213727 49.9547657591437 57.2960245538881  
43.4410741327254 48.2748123114598 41.554942319225 38.5066108855005  
43.1567024035183 54.7966692984192 42.0621425894624 47.299647867533  
52.2832912331043  
SCGB1D2 39.9697332660833 32.0823591288671 39.991353369336  
35.8472302065546 37.7576900881741 42.0574848021044 41.8315602975157  
45.1714698794331 40.2274522635576 35.4990901121893 36.2435874904689  
45.6692241948108  
SCGB1D4 36.9060997041453 39.6995529770239 35.8265993915844  
37.651298468202 37.0526522140242 36.8059561571675 39.3585350448719  
37.6557714476853 41.9635525160083 40.3235655331796 37.0180934800573  
41.7575097298927  
SCGB2A1 42.5193208629123 44.0409178714232 42.3536549114165  
36.264823544143 42.9090346219023 39.0266821712099 41.3594868055879  
38.956280281655 46.581796165231 41.2276963324981 44.9713479185144  
43.7672102682067  
SCGB2A2 38.385865183581 35.6434124419782 38.8775560911841  
40.4359177791566 43.1252272136667 40.7616966228404 37.2892641289258  
41.6466169548846 35.4332080966594 38.2069499294002 39.9070785037411  
43.8575940017119  
SCGB3A1 47.4678477186801 68.4278345554565 659.126408705362  
37.651298468202 47.6884372645373 56.0477607422828 65.7873990226533  
102.626604917608 51.7549258776884 46.441301934328 42.7275315121163  
44.5432192783161  
SCGB3A2 42.5193208629123 36.7976562409506 40.0998167098057  
29.2731027042641 35.0181575202066 36.9060997041453 33.5578650644246  
38.1835938174625 34.4716904283753 34.5718473203083 37.5583886316038  
38.745552403895  
SCGN 39.5676051939342 42.5269793679335 42.5406888281114 47.8164193292842  
37.956732373465 44.7804080899431 51.4349390827895 45.642304356051  
34.8552366193358 41.5435611403119 42.357910063876 40.4639532172338  
SCHIP1 74.6134978387686 99.135422012965 93.7782490229256  
77.3864518736634 112.000099082544 182.204124363356 67.1926218405833  
73.2037966614621 88.5564369981649 85.1950626054282 91.983638239817  
194.703024752864  
SCIN 103.561100886469 60.7495043977707 169.001200403896 55.6481366056639  
111.877209777434 62.1857038870283 279.175841990291 270.947794977829  
52.7512110769042 158.091115152384 122.791460208787 155.564141715819  
SCLT1 42.8036731479932 64.2174369755376 52.8041782638549 55.8709511400674  
55.6991707857987 53.565717255469 41.5817737564592 50.1833483241864  
47.1744296124496 47.611018474151 52.3761286517985 46.3411353377615  
SCLY 50.379587451669 56.5319193881205 47.646800205189 58.9168466928565  
49.32293280121 50.8533737532786 45.4799270968969 57.037639245179  
59.4236178078244 56.8201201798712 49.4593570700221 57.5372732453319  
SCMH1 110.487281983469 103.43536623122 88.8568707880669 64.9839099669442  
90.4909052059366 115.970093171058 105.05842887748 84.4443931765378  
97.3310111513156 140.992072231913 125.690995228055 141.108035324183  
SCML1 43.9477262001082 50.3863137257348 45.7465677574118 68.7342341724306  
56.8307116636372 72.2544131004774 62.6048727240291 41.0920120134247  
51.9247097592613 58.5087296620514 62.9835084197147 64.9418945936106

SCML2 48.6621527194963 52.1062000766427 43.6670755115848 44.550322123994  
 53.8260140375214 57.4777075615651 48.0283573444179 43.3262148375525  
 53.2046867327331 53.1993028936883 53.8260140375214 50.7487159427973  
 SCML4 40.4639532172338 44.5884811528117 46.1653991089885 48.309866878365  
 38.4540849632254 41.0582900711341 40.3302268293707 43.5544347011646  
 44.2607789091176 45.7911932481722 39.0550139257658 41.1554481567603  
 SCN10A 38.957687788868 37.8217989841918 37.5597671487621  
 36.4564050256915 41.2740822675592 38.1169703906207 36.4098694708483  
 40.7311497914871 44.7058233759912 45.0155543555707 42.170702295259  
 35.3525469364579  
 SCN11A 37.55264801907 38.4330755397458 31.5151915411476  
 38.0958223740111 36.5393857306744 35.2067831864574 36.5352572191451  
 37.5511560880902 34.6720534245631 96.9051967257119 47.299647867533  
 42.8864415494484  
 SCN1A 41.6354649482853 39.8695929627783 37.6557714476853 39.6292788039793  
 36.7356360093603 35.7034203372528 42.8684958525042 41.5464765641928  
 39.2809305246091 43.7303813515864 38.1835938174625 38.1421709520616  
 SCN1B 49.1147639552724 45.8669209716694 40.8420925848403 49.3654837541353  
 43.844855336215 110.238734353354 44.0687697278114 39.3113207075992  
 45.0997987980157 43.9783383422823 49.6314545328943 48.3119523820103  
 SCN2A 40.8681871019812 42.9358255168086 43.0016969050339 44.0451487108213  
 41.4273122914951 46.9395507483816 44.9863726205428 40.7752992161136  
 42.8036731479932 44.3124153157801 44.8278961893983 40.1179210534118  
 SCN2B 43.5710871617107 46.0713306971594 35.9305494063137 43.1847628331565  
 41.3755760434934 42.4580504587581 39.3585350448719 42.5435283762933  
 40.8970401536578 46.2286164776607 47.7535797917441 37.5556299264699  
 SCN3A 49.540449125788 62.9165938167938 64.408176016319 54.2886483704949  
 70.3213394542625 70.9767460064692 68.5725871332774 85.6170780640867  
 90.5860767851498 71.6537776654915 64.0541263553251 69.303129494807  
 SCN3B 39.6292788039793 39.7835513496873 39.6451483836089 42.1622837416589  
 40.5710637884029 46.0364000143537 37.5469247328848 40.2819379659218  
 39.5806465938526 38.8173773425835 39.7342718293432 39.7844133452634  
 SCN4A 40.9558083259517 42.4493032770053 41.3366779545815 36.264823544143  
 47.2074332636566 39.4953494583071 40.3302268293707 42.157627240486  
 40.2274522635576 42.0621425894624 46.7386599624801 39.6352613956998  
 SCN4B 36.1232327599945 39.3999056968598 44.5134109184888 40.5484717678957  
 38.0598374201407 50.4022543872993 33.6696565339534 36.43924066428  
 38.0213051227859 41.3321861371202 51.7538628098347 47.7962548556026  
 SCN5A 39.8184668132023 39.4659384119631 43.3523899508716 40.0337926471478  
 39.9697332660833 39.8724170885333 38.2933870238743 40.9901805728485  
 41.7117861328546 36.9102644736882 39.0905363288848 41.3481355128089  
 SCN7A 44.2350046179299 42.2577689927563 41.785676764591 43.9282059368202  
 34.5301949364147 44.8872784170036 40.6750540874299 38.4540849632254  
 36.197424053556 41.6373771565199 37.3687900733549 41.3481355128089  
 SCN8A 37.4554876386402 39.6995529770239 41.437237454134 40.646702696033  
 46.3150221024046 37.1317006162938 39.7576136507593 38.3684202018524  
 38.5252456306656 42.4594149893798 41.0808257270221 40.4639532172338  
 SCN9A 44.3355304829989 42.5624638829203 42.7881985796277 51.6869155634183  
 46.3150221024046 54.8660503290883 46.7100796279384 39.3709357615493  
 41.0476065156912 42.9866214102525 43.844855336215 47.3172462673426  
 SCNM1 161.439879456216 103.75895351937 179.285390561592 149.426965431854  
 174.961427864327 180.288784077653 205.086228002776 244.498602338731  
 106.454367084321 98.6706537801886 111.240804216088 121.036604456449

|        |                  |                  |                  |                  |
|--------|------------------|------------------|------------------|------------------|
| SCNN1A | 1199.29782389306 | 525.35784336478  | 187.439021508049 |                  |
|        | 75.9099205260748 | 57.4163094213712 | 53.565717255469  | 826.024359447649 |
|        | 147.017279035061 | 2568.97574985073 | 1559.50766982801 | 1618.92099084622 |
|        | 1914.9556343048  |                  |                  |                  |
| SCNN1B | 46.6348258763289 | 1232.7632290973  | 851.108027634251 |                  |
|        | 44.0451487108213 | 211.019451518444 | 92.9820860411485 | 299.136348099827 |
|        | 318.690767783738 | 387.631477822638 | 189.137593177772 | 153.992331037033 |
|        | 78.9701459806641 |                  |                  |                  |
| SCNN1D | 54.7786516309154 | 55.6972661824064 | 48.1331309338997 |                  |
|        | 71.0211264570699 | 63.686652234709  | 77.6115604215716 | 48.0283573444179 |
|        | 117.074650076861 | 50.8485682149772 | 76.8998454389745 | 79.4832790698673 |
|        | 63.7744603935682 |                  |                  |                  |
| SCNN1G | 44.436995101921  | 491.100053064936 | 582.511224532378 |                  |
|        | 42.0621425894624 | 89.2913927776683 | 44.9896851005259 | 301.941928552396 |
|        | 576.830397705584 | 90.4160198134865 | 63.8357465390633 | 79.0304119352941 |
|        | 45.2783024981315 |                  |                  |                  |
| SCO1   | 259.033660186329 | 549.407911286514 | 511.261925898948 | 298.14782785085  |
|        | 507.239294307089 | 331.935072199058 | 653.089523541803 | 292.600202149564 |
|        | 311.668075784386 | 256.614982558637 | 318.369837408344 | 300.560071753181 |
| SCO2   | 520.415257194417 | 465.887689708274 | 363.947777340854 | 592.399245288911 |
|        | 585.771656887036 | 299.524171071613 | 375.354746298695 | 309.593721653575 |
|        | 310.461601607662 | 150.46866649779  | 156.69976952483  | 173.856274004533 |
| SCOC   | 132.93879018892  | 167.16650846037  | 159.12163104195  | 113.783910320605 |
|        | 173.357715186701 | 238.29247862863  | 114.947362505193 | 135.540738841602 |
|        | 208.30969642805  | 133.549684980003 | 157.493875535302 | 226.456072107079 |
| SCP2   | 62.7669079605627 | 67.1299518044849 | 84.9280683258012 | 48.7646976789783 |
|        | 61.2130609867477 | 68.6424653037264 | 57.9583667603818 | 47.1403336158803 |
|        | 58.6736679311765 | 41.9097689475185 | 50.7903824729818 | 61.5948082043061 |
| SCPEP1 | 467.351570171652 | 286.927016665685 | 288.687391623935 |                  |
|        | 495.453743436613 | 242.016748817428 | 613.27814206548  | 581.093069802913 |
|        | 478.682734715193 | 856.790359133679 | 538.427311162325 | 707.4124863603   |
|        | 618.293140877956 |                  |                  |                  |
| SCRG1  | 59.3923286524971 | 41.2598458726002 | 41.528370959196  | 41.0726336841311 |
|        | 40.9950639693255 | 322.229113548162 | 39.5496902678788 | 50.0526763693329 |
|        | 45.1899271235974 | 79.6133633483649 | 60.2165699959135 | 194.079940066252 |
| SCRIB  | 151.99110418225  | 319.722393409101 | 175.673196925527 | 85.0308877626746 |
|        | 155.287591646469 | 96.6027330566908 | 132.997204273031 | 106.58628367621  |
|        | 178.249889756228 | 119.747995520476 | 127.232160404726 | 114.719721626067 |
| SCRN1  | 337.736535374405 | 95.4942268742467 | 223.801865347687 | 225.35760689842  |
|        | 243.717906276454 | 382.190644764853 | 157.095926797414 | 242.792365320043 |
|        | 125.383837024985 | 323.576613035353 | 286.927016665685 | 267.565744773928 |
| SCRN2  | 65.6556779936059 | 48.3699741879723 | 69.7855392178808 | 56.4578213622965 |
|        | 54.5683518971261 | 50.4022543872993 | 69.1414574152997 | 71.6202385170491 |
|        | 77.9978216366573 | 68.534940191185  | 66.9494774452406 | 56.2804354745795 |
| SCRN3  | 44.436995101921  | 48.1627097465883 | 47.0940613507321 | 47.5733603903505 |
|        | 50.3713170502557 | 50.0748292497578 | 45.9635923776719 | 41.7419877611072 |
|        | 39.1790517315259 | 55.073022935193  | 48.3570240922825 | 49.0655215909632 |
| SCRT1  | 44.2350046179299 | 41.2262949117288 | 42.7303139017786 | 44.550322123994  |
|        | 46.4343327861696 | 44.4619248757502 | 44.7255207589606 | 43.4544762830742 |
|        | 43.3744503319109 | 46.4944619663072 | 43.8002456102021 | 42.828737648529  |
| SCRT2  | 36.2496364442264 | 38.2263227947189 | 35.2101597814352 | 41.7614975630362 |
|        | 39.1650142708257 | 41.3553369544097 | 34.3633615460307 | 39.5466975353131 |
|        | 41.3803269429468 | 38.4187686307607 | 40.8225507267584 | 40.9683275553869 |



|          |                  |                  |                  |                  |
|----------|------------------|------------------|------------------|------------------|
| SCT      | 48.1125722136997 | 35.1224289925572 | 46.3411353377615 | 40.3180310664156 |
|          | 42.4864576619427 | 34.3887641786747 | 39.7576136507593 | 38.4540849632254 |
|          | 40.0403898620771 | 39.3698811593364 | 36.5359455830388 | 39.8497227447888 |
| SCTR     | 41.3387790895716 | 36.2103905554984 | 39.1799070031819 | 40.1804147506786 |
|          | 38.2496050953547 | 39.0266821712099 | 40.4359177791566 | 38.3684202018524 |
|          | 43.5669306063196 | 36.8059561571675 | 35.9563099719284 | 43.6753843488695 |
| SCUBE1   | 43.3638918705225 | 39.7835513496873 | 40.931294690669  |                  |
|          | 50.378948785456  | 41.3755760434934 | 37.2686490268265 | 41.253645578517  |
|          | 46.695848687694  | 40.4220196471124 | 37.3179578037963 | 42.2618615571566 |
|          | 37.6557714476853 |                  |                  |                  |
| SCUBE2   | 73.5534417023453 | 91.9238405195899 | 332.060941890092 |                  |
|          | 69.8314582428552 | 50.5110359971301 | 113.839604953506 | 275.549982777518 |
|          | 216.566390646568 | 62.6386437936516 | 613.27814206548  | 502.205366225368 |
|          | 237.864776225441 |                  |                  |                  |
| SCUBE3   | 46.7293238583888 | 45.2556760873335 | 38.5045333213784 |                  |
|          | 43.4410741327254 | 40.0599807618105 | 37.5887129572848 | 43.8206425661746 |
|          | 45.0972184964705 | 41.6616444147804 | 34.5718473203083 | 40.1742127891824 |
|          | 38.9496515344837 |                  |                  |                  |
| SCYE1    | 36.8072833828297 | 41.8848959280916 | 37.3687900733549 | 38.745552403895  |
|          | 38.9496515344837 | 43.9724628401189 | 37.1643693306382 | 39.2672712041774 |
|          | 37.4540772310118 | 39.6719190054379 | 42.5426057453993 | 39.7411455670172 |
| SCYL1    | 318.846373031568 | 340.553073657744 | 324.582288788326 | 329.437593022939 |
|          | 362.123479430887 | 327.844083226326 | 439.376432049616 | 263.765914589758 |
|          | 320.684862879691 | 272.022473793857 | 332.060941890092 | 246.351606918353 |
| SCYL1BP1 | 116.927619635255 | 87.8967913380047 | 97.0155195562193 |                  |
|          | 84.8948024208923 | 96.2739664178142 | 76.1382217104599 | 67.8919712859031 |
|          | 62.588825192561  | 69.6511571901941 | 63.4610447573417 | 69.7855392178808 |
|          | 78.2393202422664 |                  |                  |                  |
| SCYL2    | 154.509548705054 | 219.479625048916 | 164.62751527755  | 297.404152949522 |
|          | 266.985013788569 | 152.630871384615 | 222.570136481811 | 204.318269745079 |
|          | 255.087214364926 | 154.355197155161 | 143.590160385066 | 198.257381933305 |
| SCYL3    | 62.5758244849189 | 58.6494349222795 | 86.7076796107636 | 53.9517841438975 |
|          | 66.3558126170575 | 53.9517841438975 | 52.561573697155  | 49.5597867038594 |
|          | 67.1278109419819 | 73.8313212063649 | 80.8728961146267 | 84.2158827857221 |
| SDAD1    | 1087.75682788799 | 401.956364010068 | 557.275332269647 | 411.431488342465 |
|          | 602.047768767953 | 508.474794786176 | 406.33528162722  | 538.290200196057 |
|          | 519.563402444472 | 628.403814060213 | 673.002926695262 | 569.511773053233 |
| SDC1     | 360.523229691604 | 747.21265644111  | 950.740991182127 | 102.268579941461 |
|          | 415.477167615547 | 99.5958921252583 | 389.248080358801 | 373.802562320876 |
|          | 927.61341837276  | 889.638287212686 | 893.185203928127 | 435.094968715663 |
| SDC2     | 50.8388984085636 | 41.0678614026819 | 47.646800205189  | 56.9299697426319 |
|          | 77.0301627655229 | 63.1091746640396 | 42.1607322031054 | 41.3506832276112 |
|          | 42.9020321355927 | 68.6788460999238 | 63.0043412964216 | 56.7711602236706 |
| SDC3     | 42.9104454767916 | 42.985929467107  | 43.6670755115848 | 43.9577120438279 |
|          | 50.5110359971301 | 44.4619248757502 | 44.2795065595546 | 44.6107027295193 |
|          | 42.6679886757687 | 46.6598879466655 | 45.310660704531  | 43.2312848495114 |
| SDC4     | 449.701353531924 | 501.148339791372 | 339.679549262298 | 322.509777895373 |
|          | 288.447603611962 | 255.946758662074 | 371.167168940365 | 1243.32650314893 |
|          | 751.150916058018 | 706.914069768466 | 716.754656773542 | 356.88781087408  |
| SDC4P    | 48.5835484742456 | 43.683792219729  | 47.4740726032707 | 39.853175885492  |
|          | 42.269054475455  | 42.0574848021044 | 53.0277416531043 | 44.797320243931  |
|          | 45.0997987980157 | 37.2089297656361 | 41.8168470823451 | 44.6484005362281 |

SDCBP 410.257694738546 350.584135047249 287.689260887067 1369.13346566895  
244.343381048643 723.853348464335 287.627417889988 185.139615829489  
370.917477324773 207.957319374194 231.824347524066 406.964801954621  
SDCBP2 66.5063354430003 113.148617122619 143.031555728753  
41.9620007529243 43.683792219729 43.7078399718247 49.319499137678  
66.8026147385682 57.5245761633468 92.9453353261232 82.0925058822176  
130.72385089567  
SDCCAG1 76.4637616585578 110.746059249478 122.531570028682  
112.23915619297 91.1057573288203 118.010166045155 74.0039764902057  
101.888001006345 71.0211264570699 69.5080454202415 101.888001006345  
120.392561825049  
SDCCAG10 170.644636226884 195.543760781509 203.82788889213  
185.677720870442 214.127390534906 294.620463776036 201.800572658224  
206.676666936979 188.979306100283 181.2179249806 207.245428311682  
218.701583105141  
SDCCAG3 218.819478568299 192.264432082651 121.259683158193  
100.774098314706 346.285308869994 142.172292334093 151.205675888138  
105.212030988223 126.204310123186 105.796515736125 128.923092916744  
107.654589391726  
SDCCAG3L 40.8681871019812 41.8848959280916 42.157627240486  
43.9282059368202 45.6895223823001 46.8954576545929 38.941855825269  
51.555506218204 43.1805016690297 39.2623423164488 43.4709415392696  
41.9430737035925  
SDCCAG8 64.3502363726659 69.640968387662 65.49167373382  
93.3216420803293 65.8319449883221 90.99086730704 57.4047331041592  
48.3590401011623 60.6706478075023 63.9129423266349 55.0404566626821  
55.3563533836982  
SDF2 418.693470287372 299.665413950641 250.959527806799 357.507822825765  
487.065758294354 306.14500148663 354.973265582488 341.206585871289  
450.972039573066 366.326747630465 258.589426470951 358.402309513947  
SDF2L1 939.453799186397 666.265306908449 500.549865625701  
1135.43644148537 1060.64261592822 619.337575854369 833.136660528149  
778.723771259404 782.639346040155 355.568857981155 509.233939630204  
538.153124145211  
SDF4 331.474920376907 418.01691355558 407.161973433666 342.223067809915  
330.814531248695 402.794855141389 326.902009704746 360.595761673073  
409.899024157206 279.226221967169 437.015713629277 243.609178976074  
SDHA 436.757445186987 373.330920144642 436.757445186987 237.4882538723  
696.946621824188 381.6928205836 621.012072500314 198.360449141425  
573.394745674984 284.575587310164 351.764130340952 304.658728492827  
SDHALP1 171.689014874037 104.341160312305 130.64028226556  
178.249889756228 130.65627609817 89.3868257841517 149.747000657513  
259.769260154253 102.840494180617 162.143245260314 187.836567614419  
144.858109227889  
SDHAP3 43.4079968811658 44.2384941015805 46.6248133231179  
52.4351670989268 51.0785933435539 42.2577689927563 51.8874698846902  
43.1931731665131 47.834436078111 45.9426591985894 46.1345128999145  
41.9430737035925  
SDHB 602.726022292973 926.61614755153 991.630429625437 953.629734158221  
1059.63540694644 777.854349637516 1033.99699402259 1057.44729389649  
981.039763059681 560.802447943839 496.791391622565 785.79878416775  
SDHC 200.790001763897 158.349509235411 298.420882349382 148.529482776555  
311.195207833203 209.860757709908 217.848539722853 178.323615832679  
901.155190428891 205.672652429972 226.785831708938 264.335068353741

|         |                  |                  |                  |                  |
|---------|------------------|------------------|------------------|------------------|
| SDHD    | 175.632783805966 | 198.922575188741 | 194.951677338012 | 218.917221711155 |
|         | 242.631544185516 | 317.004252313348 | 158.532307373857 | 147.187118389181 |
|         | 242.282363793567 | 153.177725521199 | 158.590601962928 | 333.421080658854 |
| SDK1    | 43.1805016690297 | 48.7847528954724 | 39.0470836345045 | 40.8084239472012 |
|         | 51.4092491522288 | 45.2852528185486 | 54.1707158323527 | 55.9303347977781 |
|         | 55.6617952786921 | 53.8716214229685 | 49.319499137678  | 41.8200132437731 |
| SDK2    | 42.7150227340364 | 34.8137085420423 | 40.0998167098057 | 44.265834798964  |
|         | 48.0234896130991 | 39.6251842352088 | 44.6032218589199 | 90.716460692818  |
|         | 44.619512785899  | 35.93950183586   | 43.4709415392696 | 44.3521099857368 |
| SDPR    | 58.2902084992082 | 73.4899394858239 | 66.737740728688  | 109.503117647487 |
|         | 78.5141640924736 | 681.850915393461 | 67.6767845246581 | 93.6124140212565 |
|         | 60.164635768614  | 403.428042132639 | 267.024267633341 | 250.866560791828 |
| SDR-O   | 39.7320564340365 | 38.3322849790657 | 39.6451483836089 | 39.7840818430159 |
|         | 37.3508690072156 | 39.2248354955045 | 42.9191764437547 | 39.9941474864076 |
|         | 40.1738310955128 | 38.8173773425835 | 36.7892997857376 | 39.1553169409075 |
| SDS     | 67.7831020218081 | 41.3610369241157 | 45.5883690965192 | 195.765247956108 |
|         | 56.8307116636372 | 48.260931742163  | 47.8947595316832 | 130.792245267896 |
|         | 42.9020321355927 | 39.9948390976317 | 42.2618615571566 | 43.9541718254769 |
| SDSL    | 270.44099301072  | 100.271925566074 | 112.328675926999 | 274.445985892762 |
|         | 196.844428284247 | 93.1067450332473 | 151.99110418225  | 186.984157187427 |
|         | 217.875223856197 | 109.192770642308 | 125.221639689345 | 115.735359157053 |
| SEBOX   | 38.9229928131225 | 45.0905928998779 | 44.4311655729487 | 45.2759158146116 |
|         | 42.7107928951766 | 45.0882356578404 | 42.0605906240248 | 47.6397712007919 |
|         | 47.0804681460898 | 44.5303781239209 | 42.9634662926872 | 45.1735152121056 |
| SEC11A  | 1689.77066894108 | 1343.66876893729 | 630.53864514662  |                  |
|         | 1023.81381775221 | 1611.35913846618 | 1440.41726370246 | 1421.44237064813 |
|         | 1280.77934331703 | 1345.37091574015 | 1127.96214301065 | 1194.10154988793 |
|         | 1255.10866316499 |                  |                  |                  |
| SEC11B  | 42.7150227340364 | 41.7337506166619 | 39.7411455670172 |                  |
|         | 44.9370339275041 | 39.859345745831  | 46.4648868771662 | 47.7390230243778 |
|         | 45.3872406432794 | 42.992884918158  | 44.1379638573455 | 44.7114813656401 |
|         | 42.7782216342806 |                  |                  |                  |
| SEC11C  | 69.0975200641705 | 164.072453709966 | 122.748811531184 |                  |
|         | 290.546420262364 | 61.954674965065  | 111.240804216088 | 86.3237770387663 |
|         | 66.4207938873541 | 148.558544568518 | 53.7196173866021 | 80.7198077526005 |
|         | 102.717305041352 |                  |                  |                  |
| SEC14L1 | 69.5462764096011 | 74.4259825158584 | 90.0157406552551 |                  |
|         | 527.830011424742 | 60.6014434868965 | 76.9535968101411 | 85.417321091835  |
|         | 65.963892742019  | 66.4251023257203 | 56.921728372453  | 59.4714233251027 |
|         | 61.5807110546718 |                  |                  |                  |
| SEC14L2 | 60.562215295948  | 41.159706131351  | 51.4308501933893 |                  |
|         | 42.357910063876  | 38.745552403895  | 47.7556758818053 | 49.6872467499977 |
|         | 53.4109882045447 | 63.2753814090696 | 41.1222709786153 | 39.7342718293432 |
|         | 43.3744503319109 |                  |                  |                  |
| SEC14L3 | 44.1294459089314 | 38.0226905622357 | 28.8989112359112 |                  |
|         | 40.8681871019812 | 36.5393857306744 | 40.8634043028528 | 41.253645578517  |
|         | 43.6434576713809 | 36.197424053556  | 40.8049408996274 | 41.8168470823451 |
|         | 39.4490233720848 |                  |                  |                  |
| SEC14L4 | 40.6559419616644 | 41.8073910693411 | 41.2365089689635 |                  |
|         | 37.0732977341185 | 36.08956004634   | 39.7394181011603 | 43.1931731665131 |
|         | 43.0390857698452 | 41.6616444147804 | 39.1621898366355 | 46.3370338074996 |
|         | 33.4316681623175 |                  |                  |                  |
| SEC14L5 | 44.436995101921  | 42.7775752471711 | 39.8299340037009 |                  |
|         | 40.9607305725196 | 34.8426660684445 | 44.4619248757502 | 40.6216891610774 |

41.3506832276112 43.2761454096265 45.3894119568143 47.9269108813022  
41.2905987859365  
SEC15L2 46.5549623118323 45.7023929486654 42.4580504587581  
41.8347680672208 47.6195009345747 44.8114439198618 47.4439407315335  
41.0920120134247 44.4812539947185 44.4325536348082 46.9950086252052  
44.0175391614393  
SEC16A 875.787532301293 615.442484911026 320.620320066275  
548.217757366495 410.058119360034 369.877521477669 624.097858948785  
439.46735042867 340.553073657744 563.573152902421 588.736435715365  
320.966569449558  
SEC16B 36.0144420013819 32.6416008433981 39.991353369336  
35.6027791404152 39.6535880152834 35.314469458379 43.5627649099623  
33.8558232866797 37.0126425326534 39.5637454855233 41.7272875295469  
36.8690774823319  
SEC22A 185.771041814711 126.599642760314 167.966212667288  
142.714450804595 217.293240552946 126.578693258328 175.41042153356  
188.943404504867 153.059039745191 182.079641528208 150.545989010484  
141.888282820511  
SEC22B 215.800662077432 162.160380044249 146.087016079575  
297.990925644625 218.132527712083 178.44531401852 158.862722884436  
212.967855232105 165.42634596698 139.645717741863 151.111664091983  
194.703024752864  
SEC22C 103.869437847206 115.676508349703 133.060894083935  
143.679866958604 217.456127221867 173.977605406146 103.75895351937  
75.3969721155153 112.659254685552 94.9207160628331 95.6511488323697  
115.894467332637  
SEC23A 54.0990839134272 55.4106986624448 56.9133235865341  
54.8412943008635 57.8039717833131 76.1991031349451 53.4921736109774  
45.8669209716694 50.8170013432741 45.0155543555707 49.3592128116865  
65.7853960266587  
SEC23B 169.664184704618 390.331295238889 321.949943388959  
415.251775687794 416.246271724181 252.206029058968 386.934057829091  
180.128769312512 198.190904631121 144.835567449189 179.342338803631  
260.185079572615  
SEC23IP 112.211717641877 144.239350177363 152.612579631539  
162.30238363798 173.536155357688 135.361059757705 108.558977253184  
97.5962784863854 105.549249728506 127.034476771265 149.24022100428  
126.500059295217  
SEC24A 47.9175508887533 50.4022543872993 53.7792717770978  
63.3006977162657 40.3452320167286 54.4753345912615 45.4799270968969  
41.2551966132486 52.8502823653368 43.7303813515864 39.8184668132023  
49.3087627580849  
SEC24B 57.974826209076 62.0285276532408 63.955655956484  
66.8580367262895 66.7826466218147 68.0866896208613 54.8074655158941  
53.6782125131958 67.6169355376864 70.2354761751695 78.7825895852659  
86.5316479840325  
SEC24C 361.632211543977 403.243939813779 415.759723627205  
350.278532614563 359.628703006773 341.397811775105 415.477167615547  
347.247950836937 925.486088550061 429.576301511638 550.861615347663  
355.642611713396  
SEC24D 74.4565795414712 75.8280474316969 54.842638106265  
79.262977183608 61.8471691369569 82.7269382676336 47.4439407315335  
48.272324215504 74.7934385405346 54.4825201506931 54.2999306485758  
83.2925226467532

SEC31A 274.493399403322 206.337508331566 198.288493088076  
269.184000351658 180.756651647731 312.015358620043 151.047739254277  
227.206974078547 180.622563149455 201.180226922613 212.00247895282  
234.615033303459  
SEC31B 38.7537364570873 37.4772922422734 41.1367478979484  
37.29566077996 35.7098133359722 38.7578265341627 38.7745734037492  
38.9271399577966 39.3506426665347 38.8173773425835 35.8189146854926  
42.934549734195  
SEC61A1 1707.92349760322 1169.14891282789 1347.15664445545  
1573.61108703981 2243.24648907474 991.630429625437 1345.37091574015  
1421.44237064813 1573.61108703981 1434.9271715167 1848.50311456636  
1033.99699402259  
SEC61A2 54.4384603094793 52.8796369426118 60.3155766445629  
50.7046706880325 72.5027069303875 49.2050538150106 64.3669451425581  
71.0593419018503 64.7766649630041 56.685925255591 51.1483696410762  
51.5741598315033  
SEC61B 1157.65264077595 1214.73798692268 594.184150517102  
1501.67042548971 783.440408023061 1023.81381775221 1109.17675353971  
1026.51177853708 872.305108096296 487.065758294354 704.942710834565  
815.810781070699  
SEC61G 2672.94421680196 991.630429625437 895.735191953679  
1564.55598228713 1301.07436212673 1039.06999658544 1110.39060103557  
1369.13346566895 1817.14004766564 691.94603958547 578.601842980701  
1506.33570635551  
SEC62 69.9431447778061 92.8951148347802 68.3234331335073 81.5135916455124  
70.0133734659853 141.364814429951 81.454335582503 56.1404433602127  
72.9752827496503 128.157032116902 111.320157744612 111.511934617893  
SEC63 65.3071954258488 48.3451401499671 46.5113110023498 49.260242314197  
39.7162631015511 55.3202238943712 42.4939802311136 54.9919060580109  
46.7414272831181 40.8049408996274 46.7386599624801 52.6151169127166  
SECISBP2 193.730784033221 217.358456452303 153.165464817911  
168.288592321667 137.720182545143 179.605537867711 245.439289067575  
109.649431670339 125.091427687365 211.897320355251 272.36028618845  
213.309547409053  
SECTM1 36.0144420013819 34.15544299189 36.2683886571585  
43.4410741327254 41.9842695818285 36.6271061451613 43.5627649099623  
40.2382908228517 35.4332080966594 35.0668743708816 35.7953070087288  
37.1747156131306  
SEDLP 94.8260360398356 82.6602736441839 85.9692990407066 89.1290937615998  
99.8699868526053 106.78552222475 94.3537052300317 77.3999378505514  
116.094881058504 66.7299966077909 70.7045582269595 106.99628036922  
SEH1L 89.6313467455698 90.8188865732032 97.8052968915826 79.8844295847317  
114.728039556826 109.607667469015 94.2762661604561 83.5767232665142  
120.426087248804 75.6691048470495 76.4983049841207 92.7082075328685  
SEL1L 49.7827734675743 49.2050538150106 48.9944486068347 109.503117647487  
44.147557390293 55.4694986901287 49.2546642180676 41.9315419791594  
49.641159251878 58.9836017745712 58.3586374083245 52.9609836781499  
SEL1L2 39.0620487644635 33.4967065724734 38.6005272730664  
44.4367387274922 36.08956004634 45.8325181856483 29.4322896559759  
39.0620487644635 37.2810767789306 42.1622837416589 47.0940613507321  
68.0751111916102  
SELE 42.1537476443423 64.7650773032999 49.6978906361694 194.896610327943  
48.7288537840562 213.380798420955 49.2546642180676 65.9143782252686  
42.1089765085639 44.4294261786154 41.4508241771315 47.7508139534968

SELENBP1 122.316617618658 62.9904770954043 105.204861495017  
42.6913548400127 58.9875400392427 179.09303345382 54.9765783642973  
81.0331497830643 156.02592319461 105.71315237465 195.063474879275  
91.3112603277315  
SELI 95.65872032796 92.2530518251152 118.467231612638 53.0284011078097  
107.094663242259 57.4777075615651 115.087963545095 137.302487233881  
113.477848709768 91.8251275769679 104.873452487222 86.8994288019115  
SELK 107.836867810972 119.591054636527 119.434418653131 222.368324930003  
120.465621774337 180.63535336811 132.425058995617 132.425058995617  
144.757886965525 137.744037647063 147.209004629384 224.665128374218  
SELL 43.6706764143908 66.5141009463313 93.1349769600388 556.092573451208  
43.1252272136667 75.4227827818591 200.41782363596 66.7530718914083  
61.4842573582507 48.2596564318071 49.0361180089431 43.2776458914333  
SELM 697.57030127315 250.866560791828 136.913434348036 666.265306908449  
192.377506427627 1588.70376317303 152.17335005192 375.818861583151  
75.6883778954949 712.80113322987 688.612748336336 475.310458821086  
SELO 136.456679728935 143.822560762049 172.869292380866 128.937837181433  
170.048690747909 116.900364583878 115.314880288079 166.036790614812  
206.989423961124 198.396715228812 170.850089909832 142.325407418006  
SELP 48.0201377454632 47.087835967892 48.8941062980393 84.4422623834916  
45.4751076037511 49.7458652239071 39.2533668167483 50.7364620410977  
45.5779686360641 45.9004543328976 49.3901004211918 54.1941919612524  
SELPLG 43.3638918705225 49.2050538150106 46.0727230219512  
69.1931891474114 43.004943518025 47.0940613507321 49.6872467499977  
38.2782436497441 37.5469247328848 45.6868589181768 41.3553369544097  
42.8864415494484  
SELS 564.929183025034 569.244038644604 308.280127837858 732.454837219705  
445.644244692294 423.804472820231 449.243439865944 355.7118155732  
488.649780652311 382.312820492386 335.655540947167 508.081726674689  
SELT 78.9563955412096 101.882591864061 101.634888749356 127.596368103014  
110.214922820817 121.53258696581 86.6186787663248 102.559678338485  
123.022511916727 120.274848052394 125.891602778425 121.104663867264  
SELV 42.7150227340364 38.9338521051669 38.9790184198145 42.8235313007746  
37.3508690072156 39.6251842352088 39.6535880152834 69.5741225986433  
38.8271346375425 38.745552403895 35.5179217192467 38.5279745308203  
SEMA3A 48.9906383294199 49.7363778831003 39.2707964550441  
62.8201270538435 57.0504111569238 133.514641336669 58.6431245059655  
62.105802634526 52.3579564953125 64.3383155834968 76.4389426517528  
66.737740728688  
SEMA3B 62.6702927225656 44.4639405506967 47.5249938729637  
41.0726336841311 41.4397539024976 55.2515150764173 41.0871827071116  
53.4109882045447 44.8003345643334 56.8875898013449 48.5835484742456  
48.5123041297835  
SEMA3C 48.3814421939888 73.4899394858239 112.727277807495  
60.7741670229412 123.506372870621 113.979504140326 65.3694267397114  
41.8417024632349 119.095094052197 81.8426140611297 68.9745034946434  
91.3112603277315  
SEMA3D 35.3227485563945 35.2143190355414 37.3687900733549  
38.3166554965434 37.4470183315826 41.0582900711341 36.7356360093603  
34.806104801006 35.5220586859301 37.0320432433314 39.8184668132023  
36.449101775775  
SEMA3E 908.328776521114 455.774407260725 539.720977763663  
656.355333007615 349.371668774717 374.427492246826 733.358170858378

1051.58050264114 439.376432049616 1260.45604038487 1260.45604038487  
845.41973083225  
SEMA3F 121.744701580607 308.336693903042 807.620534408416  
94.9785931907153 325.769076169162 110.13638939902 305.684635013927  
162.721587349434 539.720977763663 444.618035487523 404.674869177442  
209.794541970107  
SEMA3G 34.6977013306396 42.3550738181144 34.3633615460307  
40.646702696033 37.4470183315826 43.6670755115848 33.2425023465738  
38.6454098044474 48.3954967265007 37.1275334308172 35.046946054314  
40.0557788909923  
SEMA4A 111.691813916343 282.802560118785 345.713643158898  
437.542517888395 199.035083736742 87.539553421006 213.261004438127  
191.284436365696 183.526640731647 298.420882349382 251.65044168003  
154.045685048215  
SEMA4B 1466.88103496067 426.622204035624 727.788854407888  
156.69976952483 256.426184741007 161.526970033915 189.204794959564  
329.763197973922 1075.04105984319 407.818713538416 347.552309199761  
649.487838020327  
SEMA4C 73.1931742801095 54.6089451252049 70.0059240383657  
45.7397504535169 56.4685270445642 60.7488007939604 56.9320717885002  
51.1694248620208 61.7865043876727 61.0935621637178 53.8856501960117  
61.0025829061063  
SEMA4D 460.340300658834 561.509463439533 382.120608305668  
1228.1735887278 204.490115029568 156.864177272437 493.112119983877  
373.399443929227 266.323732730581 314.695946588538 491.8684831079  
259.332340491331  
SEMA4F 95.042308285667 62.9904770954043 74.9113162056974  
74.7732045170597 64.4999048115671 68.0501900087917 70.7238101239421  
112.805898501551 67.0290776715331 82.0149542477384 78.4590546118913  
93.7924763988692  
SEMA4G 42.442231667357 58.0218262176065 47.2055133646385  
41.2551966132486 40.3021896270845 58.0353195691931 74.9059650336395  
45.9604707098953 50.5368663784059 51.0055825931636 54.8532558909227  
46.7591817286632  
SEMA5A 67.4304134449444 87.9963662401769 68.9833517108866  
68.6379135603075 119.291755076832 54.2978574294868 286.927016665685  
147.704325041249 174.179617483251 149.812291220906 129.37368123079  
112.881899194726  
SEMA5B 50.2663821500171 47.7246924920997 44.014441886238  
44.4912617551615 41.7419877611072 39.9777866059804 45.4164642922183  
42.0847226073592 42.0126083977597 45.5776159432079 39.1878770155069  
41.8200132437731  
SEMA6A 50.1533437545239 577.276184555955 704.15545332905  
106.582060920252 373.077564417927 185.360921731157 563.065549077627  
100.234661597218 1202.11455437028 370.330147221688 226.553946570328  
363.002913525646  
SEMA6B 46.4760131160091 46.1074305700679 47.9035532886869  
74.1282220615085 43.1892285249551 53.3185097662527 40.2669497398702  
44.4489662507893 45.1582526167046 46.3715909653832 47.0707618523034  
50.9339938653926  
SEMA6C 41.6354649482853 45.4143854024453 49.7350276169552  
41.5464765641928 47.0954207417646 52.7156971154405 38.4005795891396  
45.0972184964705 47.1744296124496 47.0055981216687 52.2229654768933  
42.9887069977696

SEMA6D 42.8655358072858 42.2186879350612 40.6206278359264  
40.0127516295013 41.0885562160946 42.8598805316863 41.2961828108315  
42.357910063876 44.2240843371364 41.6814593724213 40.6373400186325  
38.7185568318796

SEMA7A 46.1673159982664 51.4413099192899 38.3166554965434  
46.7577982595088 47.2074332636566 39.6251842352088 43.4544762830742  
51.555506218204 44.1519466943185 38.1042454705119 36.2435874904689  
40.3691324547049

SEMG1 52.9240098541574 49.4493009852254 50.8303921211581 53.0284011078097  
53.9074374788981 88.0277512472211 57.4047331041592 409.724772942357  
51.4413099192899 52.1788489555942 48.4928863469279 49.4786466722535

SEMG2 35.5179217192467 34.3715326040967 34.6977013306396 53.2046867327331  
38.2496050953547 46.4648868771662 38.6243997507646 61.5000955267432  
39.6609238036815 41.6373771565199 36.8282383070068 40.9683275553869

SENP2 75.8122107270212 94.4769283676944 111.573111498905 110.036754099036  
168.482495410546 110.757899996422 92.3034609409756 108.525500270474  
101.225705082674 102.194935174057 108.407179111715 96.5175130622216

SENP3 36.3649677956953 46.0023068797812 43.0016969050339 35.0448343468967  
35.1411239266238 42.2577689927563 38.941855825269 37.86982638952  
35.5220586859301 41.3321861371202 46.0905079010237 40.4639532172338

SENP5 66.2154717217675 58.5406981871153 53.5698357689852 64.0903425729408  
91.7629175712824 61.4944752562671 64.232967574797 88.715256326632  
70.4933405598359 48.0211752672327 49.9338905397767 55.4635297192076

SENP6 84.1254258487497 89.2751674264718 94.9104200955155 81.7765447802116  
95.6182216943758 100.271925566074 88.2427413480277 70.3117160953476  
77.4769634299218 72.6549171886783 70.0965466297064 95.7383730980717

SENP7 58.7722169145704 58.2571968311834 60.7530213660442 61.3747706295648  
48.1986674201502 61.4944752562671 49.8281348927244 48.6441988290952  
59.6246428440926 89.3011777476649 82.4263339218052 75.4935574755043

SENP8 42.5193208629123 37.5469247328848 41.2365089689635 39.2780515621926  
43.3332476888305 41.0582900711341 39.4600924554505 39.0620487644635  
41.7627910693483 43.1839109702714 37.9946685306274 41.3481355128089

SEP15 920.504890206997 853.947671456736 700.243981336466 906.833938613875  
551.915864019927 519.144074985679 693.727004855319 570.997661726825  
408.546599432857 496.303918649238 413.620123676085 816.746599467159

SEPHS1 140.504336039225 183.002191434723 134.853649092952  
112.368910939752 230.09336914921 183.002191434723 255.324974349269  
139.814194128548 284.575587310164 153.736638194572 167.746168796779  
143.443713592074

SEPHS2 226.262409390222 112.542326463419 91.6978282652998  
144.657263336504 151.175959542368 100.017263238916 105.802035886293  
209.87862540213 112.743602566917 80.6200293361016 73.2234405348435  
80.2727193069362

SEPN1 232.740032714891 240.314054155006 128.827672077002 208.897032780128  
208.269627315418 167.16650846037 357.111253129662 419.360641528378  
187.733278812798 186.450759425396 175.909221705119 144.39665228854

SEPP1 67.0577715520007 133.742988105942 90.4402629353785 114.734157967466  
86.2836002982515 413.82087661958 60.2938279880998 84.8084949516218  
134.554839076558 98.7331384143685 89.5887648181505 115.942945263238

SEPSECS 53.9626076214258 50.8812920005251 51.8122261766744  
55.4180794172794 48.0987228351168 55.1037284831588 49.2546642180676  
49.1330497909043 51.8396275386273 61.4569050766419 52.4146320099098  
47.1060577218993



SEPT1 49.1868644496737 59.897987870592 52.6275131390249 65.9476039189301  
 46.1513019317765 45.0882356578404 44.2733573199954 52.5586058896479  
 39.9777866059804 45.6355219961567 48.2910530887214 43.8336862998829  
 SEPT10 52.9531187309739 66.5141009463313 73.7945470201829  
 51.8730754328193 62.7743500747415 114.985875488866 55.012605207172  
 55.8087097725119 66.2892779596928 56.057906531592 67.7280831060202  
 103.695493532556  
 SEPT11 372.758184542037 244.343381048643 208.3497732496  
 115.048869605875 211.335020823243 226.719775835218 237.754990288051  
 188.567635000971 190.77754486426 226.970981973829 174.685146336531  
 220.426780242132  
 SEPT12 43.0930293831497 39.6995529770239 45.8844325913247  
 42.357910063876 39.0564222526273 42.157627240486 40.9157352260901  
 42.2577689927563 45.0997987980157 39.9948390976317 39.2542963855807  
 41.0657892043496  
 SEPT14 38.1169703906207 42.4493032770053 38.0452862258803  
 42.9358255168086 44.4489662507893 47.0940613507321 43.1931731665131  
 44.1311654985682 41.3803269429468 41.4397539024976 38.079222289614  
 40.1700117452801  
 SEPT2 1221.31634960736 1217.21440297138 1297.78424326775 1005.45493369789  
 723.210613328966 1416.47763911039 766.027617496754 1032.44965920118  
 1226.43929953115 1285.49870339222 1450.53108586858 1291.71781703042  
 SEPT3 60.7371790125714 44.2428359526953 41.785676764591 49.8304479381623  
 119.86041265821 45.4607426241257 96.2959923858457 331.885872312948  
 53.1249776278067 41.3641352453779 39.2542963855807 42.3117490140079  
 SEPT4 61.5236837309467 58.4016768664589 59.1040441894478 62.1776700757427  
 56.2765172175095 61.746195120737 42.4544567345985 52.6960621424156  
 44.9765369480171 50.5670783769975 54.6235981131919 45.9693232070002  
 SEPT5 139.945446129591 115.597550918377 63.092106057211 66.9997306355227  
 76.034392064609 92.1151486847283 84.4111182389028 126.302564098322  
 80.943990104641 69.7215372275927 62.0890430618128 46.3994831264262  
 SEPT6 48.4994175360605 48.2856841343379 56.5500409758451 77.2723439033535  
 46.4343327861696 55.8243694410835 43.5627649099623 44.5544727111028  
 45.4131070782132 47.0627306565247 49.81481191219 51.2623287419357  
 SEPT7 45.9090659324223 54.0052948715814 40.8420925848403 53.3967242431461  
 43.3332476888305 60.877229406755 54.0170817319522 47.2864663693787  
 54.7966692984192 54.4825201506931 59.2106652388061 63.8558858499025  
 SEPT8 44.8914371498528 64.2174369755376 48.9944486068347 47.0874209746031  
 50.0580547772867 49.641159251878 59.0457625163577 47.7889447429963  
 46.2027193115397 44.1379638573455 41.7272875295469 53.840976437122  
 SEPT9 2513.15722262176 3379.67054115975 3502.80810319252 1689.77066894108  
 2551.57660786358 2712.36664370642 3869.93390477952 1511.33844030783  
 3786.90274075023 3055.1209535841 3055.1209535841 3253.86278287661  
 SEPW1 645.702744916884 466.454993547103 601.139894733857 219.103786570566  
 373.626843592567 873.451893437179 243.27954361539 397.108901822735  
 314.36962447353 869.879392791086 721.887210480162 619.337575854369  
 SEPX1 376.141477833569 449.059703234741 677.481235695517 1109.17675353971  
 357.96130075479 781.223434214089 464.209794165593 273.540763256424  
 701.935442033195 640.944514118411 724.881002237334 588.247843264181  
 SERAC1 63.0505463098231 49.5443425465542 57.2107492415265  
 51.6869155634183 46.0977687311222 46.5387044784895 51.0013344286851  
 50.0802438185974 49.5539622682049 50.2108280478333 47.9942520395434  
 52.6151169127166

SERBP1 426.015657750123 394.00931573564 350.278532614563  
244.837105178705 349.767857026458 489.232537791775 450.865888317246  
360.900649927623 360.523229691604 596.384327208699 421.791344753995  
395.546110689003

SERF1A 42.0833588105728 48.9771231212219 42.0233072093141  
42.992884918158 43.0723817756832 44.0399598874356 39.1539892144371  
41.9315419791594 47.0804681460898 42.4594149893798 43.9802831041664  
47.5540235065658

SERF1B 134.285947677624 182.31306890697 142.309369995384  
82.7394574977114 169.391313189738 115.044790975532 83.17897860584  
124.605379715077 183.77850568836 89.5998153671725 98.8719561245756  
139.66584446954

SERF2 2417.02418518222 1925.20977162704 2036.72286752819 2545.03032507597  
2374.1766901821 2348.48320928245 2061.66570137425 1634.61795848352  
2830.73694055758 1839.09068171097 1985.3999418878 2306.14613042834

SERGEF 107.034189847828 114.965999573704 134.725028732282  
98.8657527308305 100.90948905426 203.092045210928 70.3935694362568  
91.5258329186709 127.78061946174 181.873969432903 201.180226922613  
162.02498480452

SERHL 43.8678829064872 39.5466975353131 41.7397731376692 40.918339085014  
42.6584048937949 49.8156598888365 41.8315602975157 56.7668947356134  
41.2870505273664 50.8826620053386 48.7757754239447 44.8881105026938

SERHL2 39.3100256336821 42.2114134935898 39.991353369336  
40.4967168818294 39.4693871570028 50.9724155054821 40.9157352260901  
50.5070012045444 42.3277879701507 43.4885245598939 42.8263096141654  
41.2437378488025

SERINC1 172.720244584464 164.62751527755 182.31306890697  
330.892010103508 98.4847140916184 402.412173952792 125.30588698166  
168.11088055793 102.559678338485 262.679844527518 222.368324930003  
240.265816943765

SERINC2 170.450752247109 286.996922972683 1136.88710104691  
86.0630164348952 553.707482409148 100.241349942126 591.192020333181  
543.640122689871 1234.59589464045 609.243908604949 1032.44965920118  
1176.37732422904

SERINC3 117.76002524375 196.322377166278 226.35806628102  
214.369365247268 160.950554451488 170.450752247109 123.768417863139  
157.433061993786 121.782045054657 126.319731178054 157.133627517432  
144.18700333025

SERINC4 41.4508241771315 39.3999056968598 38.9790184198145  
39.066284740632 34.0045980663271 37.3799542961839 35.7055410599146  
35.7973685350741 37.5469247328848 44.1379638573455 40.4504608195666  
39.5418280570561

SERINC5 48.4849194706125 42.0709558258414 49.6347864008749  
41.6564075217517 42.269054475455 42.357910063876 46.7100796279384  
52.0503062610092 57.1863195337055 56.5379973844443 44.4688999098904  
53.2046867327331

SERP1 87.4335749014848 95.0738959950301 92.804679821289 113.388372364837  
131.496769528338 89.8567957512307 78.9900928241723 91.5258329186709  
118.410983614453 72.834275688835 77.0774476767901 112.585860083115

SERP2 49.1868644496737 55.0009147092272 55.3812135024656 53.8086134112366  
62.588825192561 106.317388820963 74.416117986276 81.6529991377083  
49.9162522057712 112.02980664709 100.234661597218 90.4957279507369

SERPINA1 1738.00955642263 59.7863401969736 73.3270037834227  
879.708199333257 51.7983110178095 78.730129036128 107.528543672579

56.6341453289967 46.1101825640108 49.1217929709337 44.5276078676423  
44.6001024251011  
SERPINA10 36.1232327599945 38.3322849790657 36.178547300352  
34.5425384901279 41.8806343997257 40.7616966228404 37.4772922422734  
38.956280281655 36.197424053556 42.9866214102525 37.9946685306274  
40.2669497398702  
SERPINA11 39.7320564340365 37.4730634921545 36.8124076923959  
38.042028333747 42.1386542162789 37.9430145836712 45.0283997415478  
37.7217193704498 39.8048943625718 41.7405682794166 43.363245077835  
42.0424641526302  
SERPINA12 39.266565827316 34.0382693188794 40.6737160001291  
38.8495095797881 41.5668884168669 45.6129956328415 41.9393838138203  
42.8482181313226 39.5806465938526 39.5637454855233 35.5179217192467  
46.1592873342534  
SERPINA13 39.5676051939342 41.0678614026819 34.4716904283753  
40.1804147506786 42.1650127805175 38.5252456306656 43.6753843488695  
40.1474543172332 43.7630587657205 40.4136535208406 40.723990462047  
40.6614700944853  
SERPINA2 36.9660447385262 38.3874422458351 37.1188989884324  
39.066284740632 38.1042454705119 39.1664256481434 36.6763019766441  
38.9074189954657 39.0775870687758 35.4990901121893 38.3166554965434  
38.5279745308203  
SERPINA3 1214.73798692268 60.5571721986885 51.8122261766744  
292.389429869034 60.0736861987141 1738.00955642263 43.0930293831497  
153.685754085722 38.9006788676407 495.705224781189 350.278532614563  
1041.84536202049  
SERPINA4 43.9309845324767 34.8137085420423 36.178547300352  
41.3027031037343 36.3390947880186 39.8455060654531 30.6643697826563  
37.5511560880902 38.2215591930186 41.0057887014368 37.92304440150891  
44.0451487108213  
SERPINA5 91.0346886951891 40.8880530359822 51.1347974668251  
49.9014504704021 39.6535880152834 72.3523300799007 38.5066108855005  
35.1738399826814 41.1742244762318 49.4006068471301 38.5668610487033  
43.6753843488695  
SERPINA6 35.1307934330047 36.9994058279362 36.6522278218553  
41.6564075217517 41.467005949568 43.0860383229288 46.0228732507872  
40.831207953647 41.9635525160083 45.6868589181768 41.8168470823451  
43.6753843488695  
SERPINA7 38.1169703906207 43.5182502375207 40.6737160001291  
36.890925044696 38.8456942580061 44.0804700754786 48.4859552186772  
94.7718338968252 35.6139301508335 39.5637454855233 43.9450023643394  
42.357910063876  
SERPINA9 39.1590964332473 47.015085768072 40.301483914446  
43.6726153508978 40.0599807618105 42.0016830644258 40.4967168818294  
39.6474008369935 41.1742244762318 38.8507804383261 43.844855336215  
42.7275315121163  
SERPINB1 327.912730756303 167.678403380953 176.991120397205  
822.822769402853 211.196171061328 397.520960156896 235.222472959869  
204.318269745079 419.563859911367 119.634256037186 99.6288131333575  
143.391384762612  
SERPINB10 38.385865183581 36.7976562409506 43.0016969050339  
57.6511495792664 39.0564222526273 41.7627910693483 42.0605906240248  
48.7814131120945 41.074824727477 42.3606390470387 40.4504608195666  
48.6795178347248

SERPINB11 41.6354649482853 46.0713306971594 60.3155766445629  
44.0451487108213 39.1650142708257 47.5733603903505 44.7255207589606  
44.4031868028216 42.2577689927563 41.0057887014368 47.299647867533  
37.4554876386402

SERPINB12 40.5654775358427 37.6383530120621 38.0452862258803  
43.8002456102021 37.0526522140242 32.5219627196161 40.6750540874299  
36.3405039629059 37.4540772310118 40.3235655331796 43.6629145624937  
33.4316681623175

SERPINB13 84.9075858560758 39.8695929627783 51.223859150798  
48.9944486068347 36.3390947880186 34.8956628705329 33.6696565339534  
69.0819394834919 41.863927676552 39.2623423164488 32.2133093774284  
41.0657892043496

SERPINB2 43.4626049853157 45.3036821110221 51.0889740983457  
262.624624672404 48.7288537840562 44.7804080899431 52.6510639680705  
52.6654109976514 43.7630587657205 37.5597671487621 39.5792604499113  
41.2437378488025

SERPINB3 230.486681581762 42.9887069977696 150.262748333939  
60.1837189855762 37.7170995811297 44.0804700754786 42.2577689927563  
79.3614922672599 44.8997235283254 38.4187686307607 37.4345152884462  
41.9083581529276

SERPINB4 86.9816932158186 42.5269793679335 70.2577825186943  
50.5310598656998 36.08956004634 38.5252456306656 44.9863726205428  
46.3685439301234 39.853866204927 35.6208308220005 37.5583886316038  
41.2437378488025

SERPINB5 252.949225605064 934.48498309932 1382.25775340179  
134.394743648475 56.8307116636372 63.1091746640396 76.6094442444074  
306.037739986164 438.22469176123 278.453446231317 283.21175871127  
333.122044191102

SERPINB6 399.80505620721 433.89783033465 349.90835241442  
559.427936614255 853.947671456736 701.935442033195 501.148339791372  
562.798580332885 1090.86617066541 576.830397705584 624.954583057431  
516.992846073349

SERPINB7 46.0023068797812 35.9740633536164 44.1070537445005  
49.5424425850549 38.3561682218911 42.0016830644258 40.5585676679482  
41.4812544772644 40.0403898620771 40.6533975461148 40.5824352835642  
37.5556299264699

SERPINB8 77.2979451706651 80.2112932898502 96.9880759408512  
228.809697062726 52.5120528339416 78.6948922624369 72.0568616357755  
77.1521355570024 110.422857502267 51.7594352155304 58.0800636554122  
66.2027948645675

SERPINB9 41.9407041937973 44.9370339275041 43.8495248991589  
72.4834467838798 48.6224651100733 40.8091178323174 42.9191764437547  
43.6753843488695 45.8325181856483 38.4829727716328 44.2527566343661  
43.1805016690297

SERPINC1 38.6454098044474 38.4330755397458 37.4642807402741  
43.5627649099623 38.0598374201407 34.0777108441756 39.4600924554505  
32.7676164492555 37.7384958256497 39.9948390976317 33.7948557837079  
37.3600014814388

SERPIND1 37.1485601150873 44.6918600441328 38.6727842796202  
41.7614975630362 45.5809132232681 68.0501900087917 40.0052661202207  
43.2551508830106 37.1820543575123 53.8260140375214 49.532546810992  
46.7182294568603

SERPINE1 227.642500471069 425.522158941437 715.662312404643  
608.579654909865 147.285007921741 128.559660070271 100.139490974785

555.727708387209 261.653821192385 51.8412522234186 48.4717951775049  
190.161505611036  
SERPINE2 1337.53997230271 475.881757842864 893.185203928127  
1621.89443989657 736.078559195579 761.341795853104 91.116454717205  
428.105433953405 87.7337304906377 1243.32650314893 852.769974690777  
2474.22199172028  
SERPINF1 285.322305931794 79.909124697198 51.9885249508283  
238.893145911331 72.2665537421443 425.304961783517 44.9863726205428  
106.58628367621 43.8482802038826 195.672836308456 115.052948380817  
166.652850759559  
SERPINF2 55.4004611309636 47.9665737016961 40.931294690669  
68.1992221684165 41.3755760434934 48.9826868640753 42.8684958525042  
38.2782436497441 36.3649677956953 45.4614234442527 40.4504608195666  
41.2437378488025  
SERPING1 244.872078761743 102.00080367858 64.6446465846487  
137.744037647063 77.9085946827079 401.956364010068 62.0404348860702  
132.779797111688 446.162602155964 176.936216428226 211.335020823243  
168.737634511775  
SERPINH1 1545.76489731307 411.73316510051 516.349618186681  
509.879213331349 1017.1803754111 437.015713629277 538.572110053093  
329.437593022939 717.997180920384 394.764369100963 377.573838771285  
399.80505620721  
SERPINI1 53.8856501960117 56.6617674371349 58.112348043634  
72.0694688774804 45.8051846088552 46.1974343793412 43.6753843488695  
42.3887531663733 37.6383530120621 45.6868589181768 46.9919960628953  
47.5540235065658  
SERPINI2 41.0608773166058 41.554942319225 42.4580504587581  
43.6726153508978 41.8806343997257 41.0582900711341 44.8643898647322  
44.5029690493211 43.0930293831497 47.1001757441025 39.7342718293432  
39.1553169409075  
SERTAD1 559.296669575666 442.99540222483 404.175196605897  
537.471287449696 214.127390534906 697.57030127315 320.555790243104  
638.305455110267 487.919045801443 341.97050042695 448.923538083456  
285.826380698286  
SERTAD2 962.079396754147 593.801086643125 425.174170332175  
736.846933148564 605.145228948011 416.149496747947 588.736435715365  
1250.15619347362 541.105845300009 639.778130093087 644.924175130155  
687.011162822211  
SERTAD3 130.184962393833 112.469702446962 125.321349772971  
107.951009163316 106.383332356527 168.366869831376 131.471030729546  
131.929700183999 152.132756414024 188.336316985251 169.391313189738  
130.716532316693  
SERTAD4 72.9154861179393 50.164201758929 67.0421310720934  
44.7980740332174 136.04447103201 75.7502062965698 79.2701322339022  
91.3607028449916 141.471672990444 73.6240672213673 55.3942006156899  
71.381069076765  
SESN1 115.454858442166 155.392743674792 217.78290286894 175.936150174315  
84.8751572193902 320.504100222566 99.9896394343368 221.195872577098  
132.294940663192 513.421493856716 394.990145259101 240.265816943765  
SESN2 42.9104454767916 47.8400694856726 50.3950981988762 47.2009420656854  
46.9906120932727 48.4758590019384 60.6548851977964 55.5578334877425  
75.6382797289563 64.2174369755376 55.1804535845496 44.7401523707775

SESN3 44.0328992213727 45.7317208802318 45.4865173433646 44.265834798964  
44.2607789091176 46.0364000143537 44.9863726205428 46.2779564481158  
63.1091746640396 59.9354531144375 49.0361180089431 57.445796273665  
SESTD1 87.6178717341967 91.0327980861321 99.6101168315098  
92.999328769924 109.594402843796 225.53019299714 85.8154958329408  
109.738537924214 83.9387217886961 70.7805103907761 102.380096190518  
165.141030604713  
SET 285.187681119318 305.339554034294 135.00141569592 118.49449420132  
281.07879968121 445.421601813221 299.706257810523 169.001200403896  
223.749512763927 205.672652429972 279.001128345613 417.086922265732  
SETBP1 67.0577715520007 68.7826057564876 54.9944485073259  
128.38299874379 54.3116862772198 255.087214364926 37.3799542961839  
136.913434348036 98.8595497262968 333.122044191102 315.880072026714  
139.847976281228  
SETD1A 366.915943380617 207.600413958886 229.035497774884  
164.612971085488 391.187784616808 188.236842521312 171.073367662623  
317.560970617018 180.717886605217 234.8262403783 295.014183084118  
131.068763088422  
SETD1B 66.2154717217675 89.19837608959 78.080034922779  
73.8480604979804 73.9456720099807 79.8026267036553 68.673864919178  
71.2867274976738 83.757054871222 73.7133884699889 68.3157692917711  
56.2804354745795  
SETD2 248.438376348617 382.251727747377 354.38923772101 322.371597171026  
792.880882528835 462.105603187328 397.154258378193 297.023913988137  
411.184636774653 467.884559162462 535.313561995599 438.22469176123  
SETD3 363.527881831453 142.55778399096 230.664926508522 313.233036704221  
284.437758089699 507.375704144286 273.540763256424 289.716911324484  
269.745248423773 327.786619565391 386.98657211459 363.527881831453  
SETD4 59.6651708873036 58.7460488758053 88.6771566133367 58.0218262176065  
103.010279797396 64.8792449604915 66.979105340228 71.9000032422349  
93.0092452285816 51.9547984751408 50.0564735608363 62.2685634967698  
SETD5 43.5710871617107 41.9894412416874 43.0971787292711 40.5484717678957  
35.9058393060637 38.7340969861754 38.7337086062875 38.956280281655  
42.0621425894624 38.745552403895 38.5668610487033 39.9519547348106  
SETD6 31.1150868775826 38.4330755397458 35.3649449469275 35.6928955245309  
31.3142073726046 34.3887641786747 33.7574445386307 36.2539950294089  
41.9635525160083 35.4990901121893 32.775958132716 45.2783024981315  
SETD7 42.2455707947223 41.0678614026819 40.6737160001291 40.9607305725196  
42.0709558258414 39.8455060654531 39.5496902678788 41.6466169548846  
43.7630587657205 37.4302011516587 38.079222289614 46.0633179231318  
SETD8 97.2535496140648 164.373677562376 135.436347750159 67.0402749076279  
118.168529531403 104.388288863224 131.808634405319 93.5358142196619  
203.373397813051 114.796237914478 105.118498939628 113.277043026153  
SETDB1 195.813431189188 153.797431763616 185.658246392943  
96.9476136220382 210.005571009784 136.190823415283 156.311985997533  
218.056839407813 148.63149183467 217.425223098994 179.974187861013  
116.793627324217  
SETDB2 67.2437599548936 60.3093790894864 59.2012779686869  
95.7571966348067 44.8897737954573 76.7063975550116 51.4349390827895  
78.3542840447759 67.1926218405833 97.7620313090597 89.377425801133  
85.4420599474339  
SETMAR 243.843941346211 323.576613035353 185.812520354849  
139.385367339095 258.120500906788 359.381284202484 373.399443929227

|        |                  |                  |                  |                  |
|--------|------------------|------------------|------------------|------------------|
|        | 275.811139268285 | 224.450710664296 | 257.194689822426 | 225.460800739619 |
|        | 210.255784687052 |                  |                  |                  |
| SETX   | 56.121460370892  | 58.3627863274274 | 60.0856496605043 | 93.1668080716761 |
|        | 50.7615314686244 | 73.0247140074919 | 54.9765783642973 | 58.9081750508316 |
|        | 56.657759220121  | 48.3693338695392 | 70.6138659908885 | 64.0541263553251 |
| SEZ6   | 40.7609952437622 | 39.5050383901884 | 43.9450023643394 | 41.3027031037343 |
|        | 39.859345745831  | 35.7034203372528 | 35.7055410599146 | 37.9837233601316 |
|        | 35.6139301508335 | 38.2069499294002 | 41.5421429082231 | 38.6454098044474 |
| SEZ6L  | 34.1336988442837 | 46.6996902348633 | 35.8265993915844 | 35.9521941716188 |
|        | 33.0463640202858 | 33.7818132446042 | 35.1307934330047 | 32.1260264272477 |
|        | 38.0213051227859 | 35.7202909649682 | 38.1835938174625 | 42.9887069977696 |
| SEZ6L2 | 275.673080691335 | 55.9379757842567 | 283.111920665176 |                  |
|        | 73.8105012820769 | 250.866560791828 | 67.3469281984384 | 110.477267932915 |
|        | 230.486681581762 | 122.924027019519 | 87.4623442823265 | 96.8945937999801 |
|        | 61.5841926644385 |                  |                  |                  |
| SF1    | 49.2595762436995 | 59.1223319112238 | 61.7572675712557 | 54.5222652584532 |
|        | 66.8129352840907 | 55.1037284831588 | 60.7992483126292 | 53.3620590158202 |
|        | 59.1716224344299 | 54.8219885610674 | 58.9676332048764 | 54.9919060580109 |
| SF3A1  | 60.1705241170421 | 81.8648220673828 | 73.8227449336903 | 85.1847490113446 |
|        | 68.0414563597154 | 68.5689807788431 | 75.5034623354897 | 59.9968592852122 |
|        | 83.3322777515023 | 82.5344501505114 | 77.1900613562529 | 75.0617828888881 |
| SF3A2  | 283.30253361072  | 304.133852957499 | 298.607482741423 | 231.637751095711 |
|        | 478.296779356592 | 247.843927763772 | 337.363827785838 | 266.250887288858 |
|        | 327.912730756303 | 279.063292799015 | 262.579533452771 | 190.81617208799  |
| SF3A3  | 540.304257899761 | 285.254985583609 | 367.235521372008 | 273.108672916862 |
|        | 393.944898808828 | 441.247306467645 | 550.990544834571 | 488.908231529696 |
|        | 425.174170332175 | 554.357391794908 | 557.979646421047 | 527.686970237622 |
| SF3B1  | 214.127390534906 | 216.821078573868 | 200.036360605006 | 220.85458646522  |
|        | 251.4927207704   | 190.214361156876 | 152.612579631539 | 184.859183550225 |
|        | 203.010958724293 | 150.051297690759 | 178.904972763325 | 215.175765091556 |
| SF3B14 | 565.72800641089  | 338.586852166449 | 340.662853333208 |                  |
|        | 424.539111965342 | 514.261598258395 | 465.887689708274 | 474.729653426958 |
|        | 965.530928317269 | 401.679080975109 | 254.373837233228 | 267.261896105785 |
|        | 467.645011859047 |                  |                  |                  |
| SF3B2  | 470.004780385708 | 550.100918659768 | 543.268021785502 | 537.841677481011 |
|        | 582.511224532378 | 495.705224781189 | 717.375649834144 | 522.377154567257 |
|        | 603.224267841548 | 631.110081413363 | 589.395944599882 | 502.67939538729  |
| SF3B3  | 317.325808319372 | 196.228284571015 | 358.979854534484 | 150.649377863375 |
|        | 278.773982275525 | 147.557451530784 | 504.676944739425 | 385.827237353675 |
|        | 362.387413555537 | 237.237762964658 | 292.389429869034 | 282.764445883135 |
| SF3B4  | 718.832367050609 | 788.232434009173 | 1164.71243740122 | 535.313561995599 |
|        | 830.295872113419 | 606.481020597082 | 1065.70206468134 | 868.899376368472 |
|        | 940.781370938596 | 701.935442033195 | 735.460645553438 | 537.841677481011 |
| SF3B5  | 926.61614755153  | 479.696469083953 | 531.69595054137  | 460.340300658834 |
|        | 506.672059588135 | 532.581631305218 | 927.114648870177 | 649.487838020327 |
|        | 512.255695437272 | 598.970109654466 | 482.5816387921   | 467.351570171652 |
| SF4    | 109.251112569215 | 128.256151920468 | 122.531570028682 | 106.398825125486 |
|        | 156.311985997533 | 113.839604953506 | 105.247736284747 | 108.299918384297 |
|        | 107.034189847828 | 125.752132815786 | 126.682296930289 | 104.26046498068  |
| SFI1   | 40.4261913313642 | 48.0080291106034 | 47.6011852619859 | 44.8727287473605 |
|        | 42.7107928951766 | 43.2427390263564 | 52.2476631126873 | 49.33855351691   |
|        | 48.9614101792105 | 49.3557747406709 | 51.8972117537157 | 48.5123041297835 |
| SFMBT1 | 60.4007755900733 | 83.8658743784404 | 78.6100656626189 |                  |
|        | 61.0006903514088 | 93.36833450901   | 69.64983895075   | 92.8579489575841 |

82.4005336009159 86.1055862202537 63.7156457274317 56.0906883466279  
66.9239565096247  
SFMBT2 40.4639532172338 43.4396866157171 42.3536549114165  
58.1798515131249 43.1252272136667 38.2293008890613 42.9803717121865  
50.9933795450314 40.2274522635576 53.8260140375214 71.8314470868658  
45.2783024981315  
SFN 1539.35554229258 484.968116511768 494.162646055732 150.336199715245  
290.535354193244 81.8426140611297 588.972273484465 945.065986430527  
1094.91235708087 323.705254926762 325.676668250281 369.797483212264  
SFPQ 47.9175508887533 48.7847528954724 60.7530213660442 45.1944222548351  
57.6791750431251 43.8582747295766 54.6414321010929 53.1052228246467  
49.2879849674517 37.7315666632629 42.911855821602 49.3087627580849  
SFRP1 99.7403508491191 61.2450200533343 47.2962360458401 120.436827608155  
52.9433495155796 898.114119553014 92.6545309624315 516.349618186681  
40.6957787921451 205.279698624867 174.392758289374 213.830284761604  
SFRP2 985.328482076985 51.0175677516029 41.0356368374708 757.257495810249  
54.5683518971261 1570.45778081591 45.1017494688414 70.2541961995753  
44.0519245668737 421.279008280368 458.230500859847 282.38663225575  
SFRP4 977.776395810338 77.775644509079 39.779935291659 92.3405202477427  
41.4397539024976 84.6435656850129 39.2533668167483 40.5158867964016  
36.7604001262514 69.2322821603564 44.7752571196612 40.5235471987417  
SFRP5 39.266565827316 35.8227939208521 40.301483914446 46.0228732507872  
37.956732373465 41.159706131351 40.7910160811527 36.9355798143571  
39.4762546236449 42.0621425894624 40.1742127891824 38.8495095797881  
SFRS1 560.954913956997 661.494376716475 555.356799014777 365.517719684028  
801.351998609551 523.25106120389 534.292112344761 739.541009338849  
602.441843384617 519.775555680262 661.269882993465 657.031980628955  
SFRS10 357.839241226513 359.733786489623 321.550107822925  
371.513106715598 432.512515345015 444.618035487523 420.887443967987  
518.527535205975 321.359569119182 529.977491403949 428.307428028806  
469.553640187203  
SFRS11 54.1745577382276 57.4054069675016 66.1541420734416  
40.0698728584484 45.6895223823001 51.8103411703261 56.3376046940285  
48.1591264215184 49.5539622682049 52.5522545249206 52.6960621424156  
55.8775622338124  
SFRS12 73.6912600813189 72.4913548133238 75.2627855393565  
63.8740412329753 78.328947112997 57.7684424138019 66.4258159334241  
51.402003176055 82.8770530537113 87.8724689898823 90.9010016862442  
82.4900927793125  
SFRS12IP1 43.3638918705225 49.1283590719461 51.5292723244077  
44.9370339275041 49.5666074434383 49.5424425850549 42.9803717121865  
39.4710743516517 41.4636047919453 45.3530683538086 41.9083581529276  
52.1918130336397  
SFRS14 139.778556493519 146.534713287435 158.557256842416  
100.883604376864 212.92335057985 112.007118067348 116.103491885674  
189.451890957713 132.985150338484 129.613152757362 171.270750760376  
153.736638194572  
SFRS15 136.947616119439 139.999709303614 185.109323245018  
147.388500451427 240.178571901813 137.802147212644 200.790001763897  
143.952224627989 176.594203350958 150.829277770546 173.711189659585  
125.154933118907  
SFRS16 64.546412747238 59.9682734755814 65.5820437889838  
61.5515639412892 70.3677225924146 60.7488007939604 73.0433648756396



|         |                  |                  |                  |                  |
|---------|------------------|------------------|------------------|------------------|
|         | 84.7642634532073 | 72.1591028956359 | 101.351907645804 | 89.2913927776683 |
|         | 81.7566533443175 |                  |                  |                  |
| SFRS17A | 404.674869177442 | 404.175196605897 | 337.736535374405 |                  |
|         | 274.259417498569 | 174.368595478868 | 206.676666936979 | 292.99497881914  |
|         | 439.46735042867  | 238.819980744789 | 214.927272114101 | 285.757720177356 |
|         | 239.466489599238 |                  |                  |                  |
| SFRS2   | 1191.93354266135 | 2357.96534075689 | 1917.90025587049 | 1211.8832855325  |
|         | 2300.20602168385 | 1291.71781703042 | 1611.35913846618 | 1573.61108703981 |
|         | 1716.82239359769 | 1099.52344340557 | 1433.1813604069  | 1366.59129560817 |
| SFRS2B  | 230.053744836012 | 338.259574728963 | 380.736562250846 |                  |
|         | 205.876395674271 | 348.450810225807 | 300.803955139552 | 220.573371581491 |
|         | 245.127632785841 | 297.475572902965 | 209.31241212773  | 284.66531382201  |
|         | 270.922452389109 |                  |                  |                  |
| SFRS2IP | 84.2104160850167 | 94.4224255130445 | 106.243765443714 |                  |
|         | 115.468303687641 | 90.0942781313264 | 93.5717680539357 | 90.0682241853516 |
|         | 100.114114765033 | 130.10148014895  | 58.3813211109331 | 77.8669914727921 |
|         | 98.2581979415778 |                  |                  |                  |
| SFRS3   | 127.232160404726 | 125.446628066221 | 141.410183156424 | 120.221914344372 |
|         | 115.827601697699 | 248.058310353348 | 107.148000219752 | 132.779797111688 |
|         | 136.22176708108  | 94.3329263062576 | 118.720812623965 | 111.357508398822 |
| SFRS4   | 1147.19483787501 | 1285.49870339222 | 1366.59129560817 | 790.094848284547 |
|         | 1425.37639004849 | 1297.78424326775 | 1285.49870339222 | 910.898566308567 |
|         | 1004.28134410536 | 863.082385199922 | 1005.45493369789 | 1470.84169670955 |
| SFRS5   | 1174.92419086759 | 2575.86919902296 | 2077.74475301595 | 1271.62760896761 |
|         | 1327.93833415582 | 1433.1813604069  | 884.036280777358 | 1896.06380611235 |
|         | 1046.8806020631  | 2150.8715161597  | 1963.91365010531 | 1752.11152588494 |
| SFRS6   | 895.735191953679 | 940.781370938596 | 778.723771259404 | 688.920755848722 |
|         | 639.391575249793 | 683.75696650704  | 1000.25990882273 | 1035.67547271468 |
|         | 753.491584605447 | 1985.3999418878  | 1083.50383916482 | 781.223434214089 |
| SFRS7   | 271.393858310441 | 306.14500148663  | 351.039814818516 | 207.540972220982 |
|         | 255.162270021715 | 511.261925898948 | 351.188432232165 | 396.93169345515  |
|         | 225.300736968225 | 258.079468517805 | 363.215063520042 | 361.945511835039 |
| SFRS8   | 114.016824404095 | 98.5746416750459 | 91.8533850418261 | 96.2385885003071 |
|         | 81.552417816742  | 91.7437837246405 | 104.158950889938 | 89.3868257841517 |
|         | 134.265039211045 | 100.849815617918 | 109.961868592118 | 89.0727613846343 |
| SFRS9   | 1333.01876209753 | 2384.00264993279 | 2215.01815680371 | 1120.83891847181 |
|         | 1886.05449875658 | 933.968759959712 | 1939.66920192372 | 857.509349403807 |
|         | 3021.24285327836 | 1115.27580736237 | 1231.77360353254 | 1465.08435775014 |
| SFT2D1  | 803.548811322583 | 1649.78627644882 | 1132.19026676901 |                  |
|         | 1188.3486464341  | 839.412133682574 | 585.421238639853 | 952.16345035163  |
|         | 589.395944599882 | 706.087945508248 | 311.668075784386 | 456.023620287811 |
|         | 826.490051619826 |                  |                  |                  |
| SFT2D2  | 42.0532901689036 | 41.3610369241157 | 39.5450079747895 |                  |
|         | 45.7397504535169 | 36.4434672195785 | 41.4508241771315 | 38.5066108855005 |
|         | 47.0940613507321 | 45.6582729799009 | 41.5435611403119 | 42.0750889188255 |
|         | 44.8372404608604 |                  |                  |                  |
| SFT2D3  | 58.4920021605316 | 53.3683962805281 | 57.50915811428   |                  |
|         | 51.7739270955254 | 66.7426485694967 | 44.9896851005259 | 64.232967574797  |
|         | 56.1404433602127 | 77.720889005668  | 65.6721629145797 | 62.1796792097014 |
|         | 51.2318935933116 |                  |                  |                  |
| SFTA2   | 51.1055541075029 | 42.7775752471711 | 45.1569741609597 | 50.2163892855092 |
|         | 48.2748123114598 | 45.9266745571724 | 41.4742337714895 | 45.2806199505029 |
|         | 54.7966692984192 | 55.3153799233744 | 49.5923712603197 | 45.5800840647989 |

SFTPA1 45.8108990837624 72.6162848018047 38.6727842796202  
47.3574589211166 42.6022652963326 42.6575535390785 37.7136011474903  
37.86982638952 40.7847110517594 40.2112371512838 38.3684202018524  
41.3481355128089  
SFTPA1B 44.7915315085948 45.0905928998779 42.5406888281114  
37.5382094267692 37.6527901109005 41.4508241771315 38.4005795891396  
40.1474543172332 39.4762546236449 42.1622837416589 44.3763859390287  
39.6352613956998  
SFTPA2 44.3355304829989 45.0905928998779 41.1367478979484  
45.4634652319753 41.7929491793697 44.0804700754786 39.8695929627783  
35.7973685350741 39.5806465938526 42.785429206422 42.6366765186182  
46.3411353377615  
SFTPA2B 39.5676051939342 45.0905928998779 35.8265993915844  
44.0451487108213 42.0709558258414 43.4681646416585 46.1634822993009  
37.4484310268909 36.9060997041453 40.7063426028871 39.2542963855807  
45.0985088502363  
SFTPB 42.442231667357 44.7200265825016 42.640829914102 44.8784374362948  
43.1252272136667 44.5099734963815 48.4099370357307 42.1874057736633  
42.8036731479932 48.8623729374733 43.0971787292711 41.9430737035925  
SFTPC 43.2724556187214 41.159706131351 42.7303139017786 48.4916117779992  
52.5645416722441 41.8613406887824 43.0930293831497 47.0940613507321  
40.5912213523345 46.8954576545929 42.170702295259 42.4607795638552  
SFTPD 55.1306642449627 43.3458769998118 45.5883690965192 49.9014504704021  
41.1868052124344 41.8613406887824 49.3854238365325 48.4670130605028  
56.0496524902806 42.8936990772838 45.2265319826548 50.8442982601142  
SFXN1 131.990661474974 154.067791946816 145.027715477051 67.7121534934164  
152.942332679485 55.6242009731278 149.978825406418 68.6704961638492  
199.634544522948 53.5498255316009 71.4414688202373 102.24202987437  
SFXN2 44.1294459089314 65.6721629145797 52.9111155236961 51.3851157261451  
62.5106969730855 48.7781962164988 98.7446830481164 63.4570909617664  
65.2125527940945 61.3529667465225 57.5430365699386 51.3244198342335  
SFXN3 49.085741080241 42.5269793679335 49.1067959632109 44.550322123994  
40.8873907150245 47.4699236780425 38.4005795891396 45.642304356051  
38.0213051227859 43.2988017098387 42.911855821602 48.6037684272115  
SFXN4 150.985239447761 245.356135592468 221.049503614433 382.312820492386  
357.029998842776 220.85458646522 362.724027984972 236.910422092851  
179.694413858411 217.743953847269 187.238252376588 201.360008430353  
SFXN5 108.022329297132 82.7351935657355 110.219274023648 93.7782490229256  
101.987604729928 68.4323624797175 123.061728345479 135.11808699414  
88.0055507173538 118.027323513177 103.961956810572 82.0124493733776  
SGCA 54.2648201582657 58.7460488758053 50.5089777244781 49.3654837541353  
49.1928206164702 231.685652845234 39.8695929627783 43.2551508830106  
47.9035532886869 132.959812230068 151.758051124404 116.17375251898  
SGCB 53.0290605707162 41.8848959280916 40.244271403831 42.8848887336829  
39.2114264935239 78.0013795192762 45.6042625176633 43.2551508830106  
42.1089765085639 58.115198353247 54.9765783642973 59.5875857071693  
SGCD 63.7066330986416 42.5269793679335 40.3384318592985 40.6857324478814  
39.3667161654772 63.7564526024479 42.2143023923639 42.5435283762933  
38.7590973867582 47.4767851750188 50.942275206135 49.1786207920603  
SGCE 325.275883498219 136.786772972738 72.4202724008052 204.502683458676  
148.781721594419 672.515393219419 226.926786963011 123.689895848613  
433.89783033465 237.039707901886 198.54718783437 200.059649606808

|        |                  |                  |                  |                  |
|--------|------------------|------------------|------------------|------------------|
| SGCG   | 43.3638918705225 | 44.1239711172417 | 43.5710871617107 | 41.5464765641928 |
|        | 41.0885562160946 | 114.389392280707 | 40.4359177791566 | 37.5511560880902 |
|        | 44.4395580493118 | 77.0226403968683 | 44.9713479185144 | 47.0130468198828 |
| SGCZ   | 41.7397731376692 | 43.8495248991589 | 41.1367478979484 | 39.5050383901884 |
|        | 42.7982502551634 | 40.8634043028528 | 52.2476631126873 | 42.8482181313226 |
|        | 40.6957787921451 | 44.3648993568405 | 38.5668610487033 | 42.9887069977696 |
| SGEF   | 43.2724556187214 | 38.9338521051669 | 41.437237454134  | 52.3004056941891 |
|        | 37.8679241954337 | 45.6129956328415 | 40.5585676679482 | 45.2806199505029 |
|        | 42.1594905198929 | 44.571915452417  | 40.8225507267584 | 48.9733758107788 |
| SGIP1  | 111.954989477689 | 58.9128486419884 | 51.5292723244077 | 93.3216420803293 |
|        | 68.7911855725594 | 70.7238101239421 | 47.1345949868029 | 50.3972033014227 |
|        | 37.7384958256497 | 53.0357938671646 | 49.9338905397767 | 44.6484005362281 |
| SGK    | 1099.52344340557 | 737.604036996153 | 763.947361966861 | 3602.30252142918 |
|        | 986.40790007743  | 1142.67599037881 | 752.837247653926 | 1493.20520979227 |
|        | 1296.28036613191 | 133.893108529325 | 256.364301298918 | 193.364522980854 |
| SGK2   | 40.1145011765998 | 39.3681232503406 | 36.178547300352  | 38.0486674716976 |
|        | 36.9702228618069 | 36.5564228761751 | 41.0381860307445 | 37.2783140919678 |
|        | 38.5682022440478 | 39.6205203043973 | 39.9899430628542 | 38.977631784251  |
| SGK269 | 39.8662795144616 | 39.8695929627783 | 39.1799070031819 |                  |
|        | 33.9645433044281 | 34.2638875325204 | 35.9305494063137 | 36.8369172900902 |
|        | 41.5464765641928 | 35.0305278582179 | 39.2623423164488 | 38.1835938174625 |
|        | 39.6352613956998 |                  |                  |                  |
| SGK3   | 62.6984594468418 | 60.8976148193383 | 54.8619797728635 | 104.158950889938 |
|        | 61.8061006855512 | 62.3997407955361 | 57.1070449050465 | 59.067083526499  |
|        | 68.2708120569221 | 53.9412154719864 | 56.0906883466279 | 52.5950880079229 |
| SGMS1  | 57.2008272301399 | 59.8400088701028 | 52.7005092555102 | 53.0284011078097 |
|        | 47.3172462673426 | 52.3187919317561 | 45.4799270968969 | 42.157627240486  |
|        | 54.7033747046992 | 45.0155543555707 | 47.4630625313159 | 53.9431600945419 |
| SGMS2  | 47.3791873993182 | 41.6466169548846 | 47.2055133646385 | 67.474556589181  |
|        | 41.6806984441849 | 56.0477607422828 | 45.3597029614942 | 53.1052228246467 |
|        | 47.1744296124496 | 49.3000844711116 | 45.390192977585  | 47.2131144508464 |
| SGOL1  | 53.1943148668994 | 92.0880591999243 | 53.2046867327331 | 49.6479308322777 |
|        | 136.657213529097 | 47.9503724044453 | 118.93749473833  | 93.299474822664  |
|        | 76.3790849853724 | 39.8873706855774 | 45.8669209716694 | 39.3575468494941 |
| SGOL2  | 55.9249770393176 | 53.5090984247271 | 53.3127618245672 | 46.4555908533915 |
|        | 77.0703146713865 | 48.4166623125005 | 55.6268253440479 | 61.2343203799193 |
|        | 60.4564459263716 | 40.3458948319669 | 48.2910530887214 | 40.7704587752083 |
| SGPL1  | 169.75692324104  | 204.229798794441 | 128.996351661564 | 134.952392466784 |
|        | 95.2833228196616 | 55.1987351219665 | 128.024853362102 | 182.079641528208 |
|        | 342.923254301057 | 205.944717184567 | 174.263925108623 | 174.04025992912  |
| SGPP1  | 44.6231541342    | 48.9259041798949 | 48.0191002461099 | 42.0102671859606 |
|        | 42.6022652963326 | 45.2852528185486 | 39.8695929627783 | 41.1575777497576 |
|        | 45.0997987980157 | 41.8613406887824 | 43.3085358214154 | 46.3411353377615 |
| SGPP2  | 61.073266843778  | 129.014076422249 | 102.980622026276 | 64.1392043244915 |
|        | 98.7446830481164 | 48.8319884367456 | 151.135296427249 | 185.658246392943 |
|        | 169.96123729479  | 117.678385591938 | 129.501808300251 | 140.504336039225 |
| SGSH   | 835.171475474151 | 405.978415338586 | 650.328627263899 | 497.290172759099 |
|        | 581.396808977873 | 287.689260887067 | 322.440680131096 | 348.913213159222 |
|        | 382.872356030213 | 418.213885929509 | 475.881757842864 | 263.44529683749  |
| SGSM1  | 64.0759817636265 | 48.1829653238565 | 43.7085219318425 | 48.7646976789783 |
|        | 56.432280646473  | 67.0489032883986 | 44.5390641547628 | 174.058845828966 |
|        | 45.8844325913247 | 92.0862930476852 | 102.993620677265 | 60.8662233098324 |

|        |                  |                  |                  |                  |
|--------|------------------|------------------|------------------|------------------|
| SGSM2  | 1224.80240464583 | 947.656220635965 | 2054.64068255575 | 433.320698413679 |
|        | 746.550225537883 | 629.763102939071 | 816.746599467159 | 562.258108316474 |
|        | 460.162024551004 | 903.756866967447 | 901.793120584383 | 795.381998233245 |
| SGSM3  | 97.3929166450379 | 108.991044950132 | 137.831070407907 | 90.2790229242453 |
|        | 98.403191200835  | 59.8102324370568 | 116.74427460886  | 104.704892803169 |
|        | 108.815245119101 | 129.951091959262 | 122.924027019519 | 144.928534157065 |
| SGTA   | 75.2475238554276 | 70.0470864733496 | 80.6674009289482 | 94.5501397951415 |
|        | 115.314880288079 | 99.9057667432209 | 110.048921728774 | 103.199200862158 |
|        | 118.696127260286 | 98.0352049248004 | 93.9956276432715 | 66.1650385535549 |
| SGTB   | 40.0988483617359 | 41.6069493017095 | 41.0356368374708 | 42.0621425894624 |
|        | 39.1087466732192 | 37.4512556186032 | 40.2601451506332 | 38.6088282130727 |
|        | 38.7298222155532 | 38.6835649080278 | 39.5399188536544 | 40.7704587752083 |
| SH2B1  | 115.321592104747 | 93.8009890556664 | 173.891042920642 | 80.1809075683154 |
|        | 197.73829635261  | 100.423344358771 | 78.080034922779  | 194.207518642389 |
|        | 107.808744445896 | 138.997932973328 | 155.225701588645 | 101.403739410832 |
| SH2B2  | 72.692416146584  | 57.8405769800773 | 62.8362064074814 | 131.347995391441 |
|        | 71.2787833369055 | 53.8461734834857 | 71.8466937395628 | 49.7309743973184 |
|        | 63.785471218558  | 48.4890615340603 | 45.2265319826548 | 47.2131144508464 |
| SH2B3  | 249.584588371496 | 326.303950252592 | 252.097980496533 | 585.054570630252 |
|        | 227.598514023545 | 286.045253557021 | 181.545493080363 | 215.399634344016 |
|        | 132.760054781304 | 101.58345410371  | 122.052907748249 | 120.866081604277 |
| SH2D1A | 52.310270746917  | 53.0383634135393 | 57.2960245538881 |                  |
|        | 73.7124988616836 | 60.8550020364269 | 47.0940613507321 | 52.561573697155  |
|        | 45.642304356051  | 46.0106098064475 | 57.165971310746  | 50.9815930710768 |
|        | 57.3697604614404 |                  |                  |                  |
| SH2D1B | 41.2424637338424 | 36.6002100641539 | 36.5474283500601 |                  |
|        | 47.2009420656854 | 46.0977687311222 | 38.4330755397458 | 37.2892641289258 |
|        | 37.9837233601316 | 32.6039814489621 | 38.0078357808393 | 33.5370783156523 |
|        | 42.2577689927563 |                  |                  |                  |
| SH2D2A | 47.9175508887533 | 52.5868047927666 | 45.3974838013476 |                  |
|        | 45.7397504535169 | 45.4751076037511 | 44.5544727111028 | 47.5963750520409 |
|        | 49.3880946790306 | 54.8946088631931 | 46.441301934328  | 41.2598458726002 |
|        | 52.0359304386476 |                  |                  |                  |
| SH2D3A | 59.046385957117  | 80.1144023887293 | 141.784776736918 |                  |
|        | 54.8412943008635 | 151.621572940457 | 43.8582747295766 | 66.1940959364976 |
|        | 85.2849531543957 | 75.3761360028971 | 102.490465676619 | 85.3930226794591 |
|        | 98.403191200835  |                  |                  |                  |
| SH2D3C | 66.4399491500833 | 75.2101993995344 | 96.9880759408512 |                  |
|        | 118.10944558223  | 53.856111425678  | 72.7213787264217 | 46.9929836306816 |
|        | 48.8279236678287 | 43.5934599686083 | 48.0211752672327 | 67.4534389579576 |
|        | 50.6333236213666 |                  |                  |                  |
| SH2D4A | 66.4399491500833 | 132.307107503819 | 201.782740241526 |                  |
|        | 54.8412943008635 | 92.4350913779886 | 58.3387916574158 | 145.583868248675 |
|        | 107.024775568171 | 140.441315708048 | 216.566390646568 | 154.93193897888  |
|        | 173.694418385132 |                  |                  |                  |
| SH2D4B | 41.187562301961  | 37.4772922422734 | 39.5954353681031 |                  |
|        | 42.8848887336829 | 41.8441156763056 | 39.3565586789274 | 39.7162631015511 |
|        | 40.8833572570383 | 38.0754153186742 | 36.6396388746561 | 40.7725311293918 |
|        | 40.7704587752083 |                  |                  |                  |
| SH2D5  | 48.269710976471  | 49.0697565324841 | 50.3334140358007 | 54.3659493975064 |
|        | 56.7776874358774 | 47.3289285415289 | 55.0226286701624 | 50.6606962867606 |
|        | 49.3780606970538 | 53.8260140375214 | 49.5551703887595 | 51.0647893605839 |

SH2D6 39.266565827316 34.0382693188794 33.553634633839 37.1894304543751  
36.9060997041453 31.9222834447339 38.7337086062875 39.9576138799997  
39.4762546236449 41.8613406887824 40.2649309204478 46.917149434588  
SH3BGR 42.1679276329916 44.4639405506967 46.1312573416873  
45.505885458784 45.8669209716694 49.5424425850549 41.4742337714895  
49.2901038327894 41.1349567921107 45.9004543328976 41.3145333832821  
50.2471139112912  
SH3BGRL 169.859588818306 230.763782802004 241.148224648134  
343.382663050351 94.1575209300592 632.981507330649 109.339287213971  
162.447872391923 220.054040993848 285.689076149891 273.807348011122  
432.355300448283  
SH3BGRL2 116.9812483023 195.168348967505 183.311305255895  
107.111886993156 81.3759380182158 308.568617575909 240.6614822416  
194.862177434028 151.975559850216 542.901822331329 450.865888317246  
346.029336456779  
SH3BGRL3 691.94603958547 511.792908607692 772.368030410394  
1470.84169670955 673.522667186915 531.36214636517 552.480471244789  
668.961646543849 701.168333137671 561.2769907009 423.254211470935  
535.585999498708  
SH3BP1 73.4611178120841 144.633447485038 199.660904693786  
106.398825125486 122.160438114932 56.2736599756843 107.015362116555  
73.746472097049 218.165286111397 206.08791147394 120.771048750176  
150.114520857436  
SH3BP2 47.0940613507321 53.3094843669564 64.7318794662958  
50.5310598656998 45.5809132232681 42.5660695551615 43.9450023643394  
45.4757965005055 49.9162522057712 38.8507804383261 39.2542963855807  
45.2783024981315  
SH3BP4 220.682149473323 74.9956591643367 135.90862211552  
160.459991480576 161.817972012879 110.202401893789 127.232160404726  
211.685526927495 169.838827072973 133.893108529325 122.924027019519  
181.545493080363  
SH3BP5 39.9255915839379 43.4031723677362 47.1719672813096  
46.8199365586035 41.2740822675592 45.8844325913247 44.0256815382334  
40.9808244695721 41.1262212547458 43.9910347090126 39.8564579050221  
46.2625470410195  
SH3BP5L 101.81885073944 102.797268694325 107.034189847828  
84.8948024208923 79.7808217577226 83.8726595797859 139.620154641549  
125.484233748017 84.4938528830721 110.219274023648 116.938715935808  
84.9280683258012  
SH3D19 117.282216847547 170.358845945725 146.087016079575  
86.3663084195994 107.54932544455 403.335980469043 95.5117928427637  
96.6957892186886 104.516141143655 257.050603883498 182.37433006793  
386.170232791927  
SH3GL1 65.2735059202804 70.6467150815052 62.1893884200745  
69.3525901554637 100.645556491457 68.6424653037264 76.3583555666815  
79.6133633483649 115.840734064724 75.5171857162768 80.5508300225954  
78.0006681166995  
SH3GL2 202.060761076547 61.6219790276408 44.7829632472754  
51.5913529948887 378.626656077546 113.090530993447 410.716248834784  
493.705301673753 48.5792058061372 970.379875059112 618.293140877956  
567.978225839768  
SH3GL3 41.8409927585705 36.2103905554984 40.5734458834617  
41.7614975630362 40.7779767565889 155.270252661048 50.3519150282938

49.8344973836834 45.6582729799009 63.197604174872 65.6010220593397  
53.0446815750355  
SH3GLB1 1030.31910195147 669.419736252343 752.837247653926  
811.142611128461 331.591589534469 425.60854194674 485.310097523194  
613.27814206548 211.451463038315 207.380865650247 291.596692248591  
553.517839467557  
SH3GLB2 1580.58484708669 3099.21690111993 1509.04753111016  
636.367246129079 797.019657306322 860.265067346622 2354.00192115549  
1640.74027400791 1261.91478863258 3592.44409869527 3343.07293372655  
1716.82239359769  
SH3KBP1 222.92930674999 165.121380058529 151.686513723244  
507.239294307089 176.224645007435 251.374750265492 451.603052501528  
549.54346533588 177.845412804098 123.013017662425 127.708268637068  
113.491158368594  
SH3MD4 44.7915315085948 43.1805016690297 42.157627240486  
38.3166554965434 35.4484652445078 44.4619248757502 42.0605906240248  
46.2779564481158 43.7630587657205 41.0057887014368 38.6662194645633  
41.0657892043496  
SH3PXD2A 1094.37961997684 781.223434214089 850.205634919459  
575.057786209737 225.056827821165 650.328627263899 135.737771384104  
356.079406408042 286.456276735451 923.470702344816 720.552354470517  
658.282562295783  
SH3PXD2B 163.995560004001 54.4190527512508 57.50915811428  
133.998375673985 65.5029051840465 95.5920087912438 74.9059650336395  
130.058147569795 61.1560835966725 69.1623287497421 63.0043412964216  
71.5836731059913  
SH3RF1 71.5484567134601 85.9799968870368 82.6983700200815  
45.4634652319753 86.5513342734384 70.380703483689 94.8766888888828  
77.118454956956 111.845105854608 84.7642634532073 92.1646038105091  
103.561100886469  
SH3RF2 56.121460370892 66.4300949831964 81.7434024567356  
39.853175885492 58.6481644777552 42.5660695551615 56.0515443021293  
51.9447450229707 108.098254669378 88.0664425843955 61.3529667465225  
63.4685821260797  
SH3RF3 64.5093306432163 53.7332797903102 61.5824518349507  
84.2013403597582 61.1216330559316 75.0685015344103 47.0874209746031  
56.4261120978333 48.9540527545343 64.2848885182563 66.8188271427672  
65.2966707319433  
SH3TC1 86.8262463672891 99.864496342189 177.535502927617  
233.96534264787 65.8319449883221 72.4651758215622 62.9165938167938  
66.5234828659154 93.4180535865914 110.785049776763 102.993620677265  
133.151333210366  
SH3TC2 43.4626049853157 42.0546888913836 44.1144663373989  
45.6677978788306 43.0860383229288 37.6484782516569 42.3360569471619  
41.6972107715212 45.7152334677154 44.2580151149956 44.6892782664938  
41.7146643589667  
SH3YL1 114.979124960177 111.248876636045 98.4136818894883  
71.9062462001972 111.573111498905 67.3469281984384 85.1227830573138  
145.050655626219 98.2512963929558 184.750252804038 117.713885770206  
140.853812988562  
SHANK1 43.844855336215 44.2630383225933 36.4564050256915  
39.066284740632 41.467005949568 37.5887129572848 35.9894133432376  
42.6450179841129 41.7627910693483 45.3530683538086 44.2925355984056  
33.6902293666089

SHANK2 45.1569741609597 48.9259041798949 41.8389336728199  
37.7146582037126 42.6575535390785 40.5805725503899 44.6032218589199  
49.085741080241 45.5238446102876 50.7855742231932 43.1724740315182  
49.434568584642

SHANK3 183.887843429281 268.936151471133 464.495132469257  
271.529471399941 218.552143403657 280.275836993258 84.9182861692273  
155.693953208351 79.5898953726467 94.952392592003 154.08990201795  
110.684033203048

SHARPIN 69.4501305462809 78.258486366912 80.943990104641  
69.3525901554637 60.8550020364269 85.6038071277319 78.6402083787251  
55.5578334877425 80.8728961146267 57.165971310746 71.5249259772583  
55.6351010690528

SHB 165.42634596698 83.7739049195868 86.0550457387351 80.1809075683154  
148.99515914482 110.088243267424 96.7125250803971 84.2434917159728  
139.712472369259 219.878589678991 207.489116930705 190.81617208799

SHBG 43.6706764143908 44.8529259387308 45.989212296035 43.9282059368202  
50.7615314686244 41.9543948167375 47.1345949868029 44.9977782988116  
44.5303781239209 49.6203214143464 40.9157352260901 43.5738557773903

SHC1 446.162602155964 375.818861583151 501.817654561915 435.632247999054  
394.255628555051 403.664724682094 266.581466060604 433.194113859912  
271.674332647296 308.568617575909 360.342857415756 316.327885002562

SHC2 52.1519713442163 46.4385386401326 46.7006827577637 45.4912838971528  
44.8897737954573 49.8135461150818 46.1634822993009 44.3557408297309  
44.2607789091176 46.5001921041783 48.2391540335232 51.5934037294198

SHC3 36.6480005877129 42.4493032770053 40.0998167098057 39.853175885492  
43.844855336215 51.1621379498014 38.4005795891396 50.3972033014227  
35.860430241131 40.2112371512838 39.4410515050885 43.4709415392696

SHC4 44.2350046179299 45.7979032939211 41.785676764591 47.3574589211166  
47.6884372645373 47.5733603903505 43.1931731665131 49.7309743973184  
43.4656637536244 52.0999467564713 46.2560238004757 41.7575097298927

SHCBP1 2498.54878472152 1136.88710104691 1411.12613289991  
1956.75875151802 1139.81870068001 833.136660528149 1796.47241860175  
2633.34100695103 1164.71243740122 2545.03032507597 2384.00264993279  
1858.94179312821

SHD 42.0532901689036 44.2105195734073 43.4709415392696 52.3004056941891  
46.9906120932727 47.9503724044453 43.1931731665131 60.9009676344258  
47.27543600687 40.8970401536578 39.6403089864678 42.2577689927563

SHE 39.7162631015511 43.0782257865587 54.4384603094793 57.8277957325085  
48.8381507187986 65.2427283850219 40.1235656101329 41.5934628038429  
41.7627910693483 45.2949878966345 55.6571390857551 49.3654837541353

SHF 45.9426591985894 41.690833180291 45.0115870036541 39.2336402665402  
38.0598374201407 39.4551617322991 39.8299340037009 43.8694505312625  
39.1790517315259 45.5776159432079 47.9269108813022 45.3763275588341

SHFM1 1325.2479053325 1023.81381775221 1134.52018899688 834.14766574977  
1247.50618540769 831.578043520215 1231.77360353254 1771.43541011426  
1824.79010714035 754.338272293094 721.266942608349 1279.02702402372

SHH 39.9697332660833 46.7591817286632 48.8941062980393 39.7411455670172  
48.9627346956003 51.702461863489 41.8315602975157 35.5798430594271  
68.4720753153522 53.5498255316009 57.7786197537899 50.3118072462443

SHISA2 110.362432903746 215.955919625615 55.8810837854139  
42.6913548400127 98.93324263369 44.2607789091176 181.966839676473  
112.613079254002 56.9320717885002 38.8507804383261 44.9713479185144  
42.0424641526302

SHISA3 42.466333667839 40.2493681589104 42.7303139017786  
 42.0621425894624 42.6575535390785 68.2614370871382 43.6025443656008  
 42.357910063876 42.0621425894624 61.1851254827343 53.9918882088235  
 46.6681271693877  
 SHISA4 41.3387790895716 44.2630383225933 43.8495248991589  
 57.4595416719581 39.859345745831 44.1737502492846 37.4772922422734  
 43.4544762830742 43.3744503319109 38.0078357808393 39.4410515050885  
 43.8575940017119  
 SHISA5 1598.78859278229 2559.659041589 2498.54878472152  
 810.201903561366 1649.78627644882 808.857027942253 4299.4451139256  
 1337.53997230271 3546.97585966225 2348.48320928245 2951.88559311416  
 1910.5347560855  
 SHKBP1 94.3674661847143 93.0251525517037 112.865496075486  
 166.304210248623 117.502489192855 85.9636350040248 144.771861156788  
 111.240804216088 100.696072546592 71.3900857589616 76.7063975550116  
 71.381069076765  
 SHMT1 85.2563664231982 83.3617516092961 79.8331445290301 58.637422084759  
 128.04037427867 84.511841810844 140.331137099886 76.011923854897  
 106.871269007146 72.5153335566211 90.6516730646251 84.7947249929138  
 SHMT2 1645.71527614542 1375.14388134842 1342.10592868516 798.033975337132  
 856.790359133679 423.093020788912 1575.71609894038 1985.3999418878  
 1521.20630233299 576.140066807763 487.64491967937 518.527535205975  
 SHOC2 60.7371790125714 57.0875538213735 52.2132783757422 71.0211264570699  
 61.3077641493507 75.4227827818591 44.2166118829877 55.3122077514658  
 58.9056300364078 44.1379638573455 67.8570354010492 77.6056319020116  
 SHOX 40.0270326792985 39.7453420559776 35.5902009223659 42.0636939252645  
 38.8775560911841 40.1846227436522 39.2114264935239 40.5654775358427  
 40.8351751854504 36.5806287103157 36.2435874904689 39.2469742642337  
 SHOX2 41.8792703207442 45.9266745571724 45.4865173433646 44.7980740332174  
 41.8503210829559 41.800198520267 43.0119734905129 46.4385386401326  
 44.5303781239209 50.2016912396771 46.0095710163378 46.917149434588  
 SHPK 291.94914449218 271.206999109791 495.453743436613 218.446312290024  
 266.323732730581 161.04166688561 410.058119360034 122.482560090133  
 261.653821192385 271.393858310441 200.174103125152 214.245832611737  
 SHPRH 52.3660712483179 53.0383634135393 59.5444359507702 50.3127977239083  
 49.5136713986758 61.2387559102636 62.3556396662215 51.555506218204  
 50.0303076717704 67.4760456862775 59.9199304173784 62.9364422691302  
 SHQ1 61.7551416187554 67.0402749076279 74.7625228047952 61.8997157694697  
 114.445779948228 70.380703483689 67.6767845246581 43.0390857698452  
 78.3082773071531 58.9069025298754 57.8991270166934 67.9141812398066  
 SHRM 497.591040004541 66.2366101899356 104.462230406058 70.7202372217584  
 163.43197105141 180.844663304872 177.27613997459 272.475108279834  
 152.72007888133 152.054785478928 186.866378606003 174.148714092395  
 SHROOM1 117.074650076861 56.463481075522 104.037949992458  
 47.0874209746031 46.6397391251762 41.6590564937735 109.062415049404  
 169.557757933574 118.251739134889 411.857557412386 517.664764759512  
 399.027079798213  
 SHROOM2 126.528654651607 214.691909801388 146.42128243217  
 67.3439996689706 155.712392689325 60.2083550387718 160.605530211736  
 69.3468840908665 282.328238928883 212.967855232105 152.555556133364  
 145.14768503072  
 SHROOM4 1578.32969650385 797.019657306322 873.451893437179  
 1142.67599037881 593.345148568451 524.047008889711 1134.52018899688



|          |                  |                  |                   |                  |
|----------|------------------|------------------|-------------------|------------------|
|          | 1917.90025587049 | 628.403814060213 | 2248.64628069362  | 2237.08790397818 |
|          | 1537.76265834076 |                  |                   |                  |
| SI       | 43.2724556187214 | 40.5400384479766 | 42.3536549114165  | 35.0448343468967 |
|          | 41.0885562160946 | 36.6271061451613 | 43.7585538437696  | 42.8482181313226 |
|          | 40.6957787921451 | 44.3303034026662 | 38.5668610487033  | 38.5279745308203 |
| SIAE     | 49.540449125788  | 48.7847528954724 | 43.6670755115848  | 36.6501141438378 |
|          | 48.1473938886239 | 43.8582747295766 | 46.1634822993009  | 44.7044140979108 |
|          | 51.7549258776884 | 47.2299678280724 | 40.4504608195666  | 45.6692241948108 |
| SIAH1    | 267.107863045114 | 217.995354056264 | 206.703865774092  | 237.864776225441 |
|          | 138.50445813694  | 183.77850568836  | 259.43283734195   | 154.730266766226 |
|          | 277.367257933324 | 136.629336440719 | 167.449422388453  | 172.317945975659 |
| SIAH2    | 86.2021418088902 | 84.2880616879945 | 70.4794854241035  | 94.7283425282671 |
|          | 112.100074154279 | 102.711934290382 | 86.4898752526885  | 71.9771425105735 |
|          | 122.143519601825 | 95.5156363110528 | 83.1184264089873  | 92.8644908993284 |
| SIDT1    | 146.483908799607 | 73.3950348855139 | 138.81810375553   | 68.9937449813561 |
|          | 69.3468840908665 | 54.4753345912615 | 65.0031119608637  | 96.8240908274121 |
|          | 90.1430468048409 | 96.6833301748676 | 107.538934056558  | 80.7227211275429 |
| SIDT2    | 174.263925108623 | 118.923419920947 | 162.540906501584  | 311.810240385503 |
|          | 138.50445813694  | 224.249210397247 | 78.9900928241723  | 169.790843803064 |
|          | 88.5564369981649 | 160.360785581153 | 158.334581991361  | 137.52864596636  |
| SIGIRR   | 56.6951078698291 | 89.8808683919332 | 60.0219418084008  |                  |
|          | 51.4573915545728 | 49.2495730217753 | 49.9270888278196  | 76.8998454389745 |
|          | 47.9942520395434 | 63.5489745357606 | 58.8361533901971  | 57.2008272301399 |
|          | 54.6183681000147 |                  |                   |                  |
| SIGLEC1  | 39.4710743516517 | 44.3529919625344 | 47.0055981216687  |                  |
|          | 40.9607305725196 | 38.745552403895  | 48.5835484742456  | 41.5817737564592 |
|          | 40.047314525032  | 39.7537274655115 | 39.1621898366355  | 40.1742127891824 |
|          | 40.4639532172338 |                  |                   |                  |
| SIGLEC10 | 56.3471340054074 | 74.9956591643367 | 84.0785633788363  |                  |
|          | 346.844545554188 | 65.6003544901554 | 49.5424425850549  | 72.8653205184014 |
|          | 58.5406981871153 | 38.8271346375425 | 49.6203214143464  | 47.6125796208753 |
|          | 54.8630527326985 |                  |                   |                  |
| SIGLEC11 | 37.2474303302343 | 33.6902293666089 | 36.1042012504758  |                  |
|          | 40.646702696033  | 38.4540849632254 | 47.57333603903505 | 39.8695929627783 |
|          | 34.064698871541  | 39.1790517315259 | 42.0621425894624  | 37.2018803984555 |
|          | 44.7401523707775 |                  |                   |                  |
| SIGLEC12 | 48.6184776976167 | 43.9697775048582 | 39.9552665886217  |                  |
|          | 42.8878262561526 | 40.4261913313642 | 41.800198520267   | 46.794716003113  |
|          | 41.7419877611072 | 42.3728341359912 | 40.9607305725196  | 41.3553369544097 |
|          | 47.0797760763156 |                  |                   |                  |
| SIGLEC15 | 42.6036491382658 | 47.087835967892  | 35.7105247506212  |                  |
|          | 41.3027031037343 | 45.5809132232681 | 41.0582900711341  | 42.0605906240248 |
|          | 39.7509165247419 | 39.7537274655115 | 44.8997235283254  | 43.9450023643394 |
|          | 40.4639532172338 |                  |                   |                  |
| SIGLEC16 | 62.2150049214174 | 37.7384958256497 | 40.301483914446   |                  |
|          | 66.7750249658122 | 47.8075998240396 | 63.9650465690339  | 37.7136011474903 |
|          | 49.3880946790306 | 41.863927676552  | 47.1001757441025  | 42.5426057453993 |
|          | 44.9070250604284 |                  |                   |                  |
| SIGLEC5  | 36.4564050256915 | 39.1539892144371 | 40.8420925848403  |                  |
|          | 95.4393274079354 | 40.2449343247539 | 44.6024422254257  | 42.9191764437547 |
|          | 44.797320243931  | 39.7162631015511 | 41.3641352453779  | 41.3234441859498 |
|          | 38.2350720635382 |                  |                   |                  |
| SIGLEC6  | 46.1513019317765 | 39.932537801639  | 43.2721716572958  |                  |
|          | 51.949834638817  | 44.5092684716474 | 52.9953193251303  | 45.0283997415478 |

47.6952179922944 43.4656637536244 44.8997235283254 47.1098984140276  
44.0451487108213  
SIGLEC7 39.5068753428772 42.4493032770053 38.5372368196365  
59.3884552643289 42.269054475455 40.7118677686149 38.5442780220289  
42.1887890806988 40.9423087727566 37.3730111198605 37.5356210308682  
37.6132753723512  
SIGLEC8 46.263826584899 38.6414316877471 40.4882741869718  
45.1944222548351 42.9090346219023 47.9503724044453 39.1539892144371  
39.3709357615493 39.5806465938526 41.1222709786153 41.0050831223107  
40.8681871019812  
SIGLEC9 44.2350046179299 49.2050538150106 44.8872784170036  
84.8948024208923 37.1565984182084 43.2805590023412 42.357910063876  
38.8495095797881 41.863927676552 39.0648733099061 39.4410515050885  
41.6550823405646  
SIGLECP3 41.6354649482853 41.554942319225 35.5833299694641  
42.2496337895968 37.6119337673806 53.4466111440611 39.7576136507593  
42.2577689927563 42.1594905198929 42.4393920571519 42.2510526338368  
41.7072675309997  
SIKE 40.0557788909923 45.0905928998779 45.1569741609597 42.4580504587581  
41.9842695818285 42.5660695551615 46.8613212048981 42.9301944191913  
49.7336769474446 39.1621898366355 39.2542963855807 44.0451487108213  
SIL1 280.680953068339 126.814751973459 175.985530451862 258.789217436101  
169.859588818306 194.225364352044 142.34144664795 250.086163187797  
156.456239358718 202.459251553516 249.37112382902 177.535502927617  
SILV 43.0930293831497 47.3536182445315 64.1080166181228 35.49696651597  
43.6587492470348 48.6621527194963 76.0041771381018 115.328304312071  
52.3579564953125 55.5206840401643 49.2206713037152 49.7336769474446  
SIM1 42.8036731479932 40.148780650831 42.7303139017786 42.0102671859606  
41.5668884168669 43.1826328292558 44.1407835440612 45.1151758109609  
45.3407340000202 44.3648993568405 40.6723334103791 41.2905987859365  
SIM2 40.4639532172338 57.0575084219334 53.5698357689852 36.7186180663551  
54.0126916508417 37.7000400506818 54.7260785901194 46.5421017969405  
63.7744603935682 47.3791873993182 37.2018803984555 36.6271061451613  
SIN3A 392.622487173359 309.802432824498 226.129944267737 186.64040927334  
295.848968688724 334.90764380842 394.00931573564 260.740251007349  
408.546599432857 516.992846073349 453.652548085387 325.450452751375  
SIN3B 146.42128243217 109.654559065946 117.556281726503 82.7394574977114  
183.028254350275 123.321810678947 136.293724800658 173.035987237848  
94.1050519074545 160.360785581153 164.176142753482 105.05842887748  
SIP1 84.7222416138393 83.4103205764925 95.5022104475922 86.6411972262415  
115.277469628296 102.559678338485 89.815123920749 77.8946473414547  
116.242109750054 77.5718089378881 71.5836731059913 91.3723635213821  
SIPA1 255.724996015069 144.162413121166 186.795349445177 248.194954741095  
176.397140445822 130.615540145155 224.109805046747 232.238647125646  
96.7422527189063 174.058845828966 163.766548456924 194.189674572424  
SIPA1L1 42.8036731479932 43.5182502375207 37.9482157381008  
48.1662933382789 44.7829632472754 43.8582747295766 42.1607322031054  
48.9826868640753 51.5229124652769 49.8393069675192 43.1931731665131  
51.8562635270111  
SIPA1L2 213.590067519021 293.258858033133 197.608255265624  
345.811673759417 143.773311381452 218.013913036142 146.42128243217  
274.962689159729 166.983092667334 232.516262874696 334.527003257901  
158.853244260329

SIPA1L3 89.2913927776683 61.2450200533343 45.8844325913247  
60.1837189855762 50.7615314686244 57.8005007012205 72.6959688212342  
74.383456365584 57.0301170427216 79.1074681877535 58.2941346100716  
49.9692385479389  
SIRPA 246.20973320244 125.588228083829 162.758841068655 1075.04105984319  
241.849566505679 228.747320301945 112.60230393988 138.55578310538  
72.8167175634793 113.994256868581 135.043488274939 154.287396750021  
SIRPB1 43.0930293831497 44.5884811528117 52.1242102345408  
64.6945454069792 42.269054475455 41.3553369544097 44.6032218589199  
46.0633179231318 41.6616444147804 46.7646877499666 43.3085358214154  
42.6758568421347  
SIRPB2 38.1169703906207 39.8695929627783 44.9758339877851  
35.49696651597 39.0564222526273 42.2577689927563 37.6036146841933  
37.0390589468421 38.1169703906207 39.7835513496873 37.2018803984555  
38.6454098044474  
SIRPD 41.1523487516364 39.6123051184545 38.6005272730664 47.6687908290818  
35.9058393060637 40.5281496800812 46.4388841354122 39.853866204927  
41.5635499110307 41.8613406887824 42.8263096141654 37.9607839934735  
SIRPG 73.8949517122417 93.9956276432715 84.1030588938732 93.4180535865914  
63.7818442618767 87.6178717341967 70.6225093592927 86.8463723709337  
77.1111458359361 93.1067450332473 90.5503099572843 102.212684008752  
SIRT1 109.889322825648 93.0251525517037 78.5325880060762 141.79653024085  
93.2630594602634 137.802147212644 118.089250727398 153.992331037033  
232.147792636393 136.461760992832 116.596605311488 110.302475164041  
SIRT2 51.2318935933116 50.315768338317 58.865217170468 43.4877740913713  
50.3713170502557 62.5542376788358 51.5967098638347 44.0736170668178  
58.9056300364078 49.3654837541353 50.7159667633757 44.7871262003648  
SIRT3 41.8833988894167 39.4537536502114 39.0775870687758 36.0481934423077  
35.4484652445078 37.7000400506818 34.1509644696334 39.853866204927  
33.7737772393677 37.5597671487621 39.0788811357542 39.6833800000587  
SIRT4 62.2150049214174 40.716553247236 47.5673419710251 48.856176220627  
56.1186281675573 52.1024135605001 47.8947595316832 41.9315419791594  
48.8067321016961 55.0016608333828 49.3901004211918 44.6484005362281  
SIRT5 134.908982962131 108.251353392321 100.205124008648 62.8201270538435  
125.891602778425 86.7076796107636 96.5030525416431 105.046407769128  
119.41355955168 95.6731932757489 88.8330881965986 93.879589378061  
SIRT6 38.304249186058 45.0905928998779 43.5710871617107 42.8235313007746  
46.5557478175976 44.9896851005259 39.4600924554505 47.7889447429963  
47.6195009345747 50.22432299342 50.3221380889396 47.8931773060789  
SIRT7 74.9741052063425 100.326655761429 98.4930941487534 75.2475238554276  
85.4420599474339 46.574682061365 86.2118355769367 67.0904616289706  
96.5175130622216 53.9412154719864 68.5370732645926 58.112348043634  
SIT1 49.3463416794995 46.29198852834 45.2313723727673 54.1240583139871  
46.6397391251762 40.244271403831 47.7390230243778 41.3506832276112  
43.3744503319109 41.6373771565199 44.8872784170036 42.57175366709  
SIVA 325.949742917126 240.178571901813 379.377005627283 268.265540230814  
412.072103136251 458.230500859847 515.216890329893 331.474920376907  
711.08269990525 359.628703006773 414.062259640915 359.241360412129  
SIX1 34.3473914754963 41.159706131351 44.9758339877851 44.550322123994  
37.8679241954337 46.574682061365 40.0052661202207 36.6452480995946  
39.2809305246091 37.3179578037963 37.5583886316038 44.8372404608604  
SIX2 49.8472708021525 36.9994058279362 40.1985790927248 43.9282059368202  
60.6400800519777 39.2248354955045 40.6750540874299 39.1652965788406  
69.8899273527731 56.9463858443402 57.5430365699386 48.9733758107788

|         |                  |                  |                  |                  |
|---------|------------------|------------------|------------------|------------------|
| SIX3    | 50.1533437545239 | 39.0102066700839 | 46.1653991089885 | 50.0526763693329 |
|         | 46.0043807840705 | 45.0882356578404 | 62.5506324864207 | 47.7889447429963 |
|         | 60.6706478075023 | 44.8997235283254 | 43.7585538437696 | 49.8253396161069 |
| SIX4    | 142.492693744683 | 91.31756001203   | 120.582525405708 | 60.7741670229412 |
|         | 153.660685857642 | 60.7488007939604 | 129.143252341926 | 98.6401096175932 |
|         | 197.011675186182 | 146.426853713038 | 133.720493104769 | 143.517244617936 |
| SIX5    | 325.450452751375 | 120.705229050133 | 166.608353896248 | 108.486774731927 |
|         | 372.131471268346 | 338.164006403    | 155.693953208351 | 176.963666283432 |
|         | 184.77921410613  | 224.480311257437 | 234.408769393378 | 154.386505379733 |
| SIX6    | 34.5886782974123 | 39.0102066700839 | 35.2101597814352 | 41.5464765641928 |
|         | 41.2740822675592 | 37.4782441311626 | 39.2533668167483 | 37.2237132058632 |
|         | 38.3418933808844 | 41.0057887014368 | 37.0180934800573 | 37.2810767789306 |
| SKAP1   | 48.8941062980393 | 73.7335870746827 | 56.8595344107711 | 105.580434427464 |
|         | 56.7602749462766 | 57.4777075615651 | 65.5800543140431 | 55.2412344988347 |
|         | 78.4937314423253 | 109.130081850144 | 109.795084617739 | 135.843624468413 |
| SKAP2   | 98.2650999749912 | 96.8240908274121 | 117.993433347556 | 210.880198736298 |
|         | 83.1874704625702 | 150.801729138762 | 82.2650787041549 | 114.396745444915 |
|         | 166.304210248623 | 119.86041265821  | 124.204392146484 | 249.679512440891 |
| SKI     | 70.2541961995753 | 56.8373628733077 | 73.0128142320238 | 66.5921967967793 |
|         | 61.6452971581503 | 72.8472187581193 | 72.8653205184014 | 68.9522412475296 |
|         | 59.4236178078244 | 61.9882398986333 | 67.8570354010492 | 66.3944891131864 |
| SKIL    | 46.9939712192224 | 38.5252456306656 | 41.924725226806  | 56.6458456890715 |
|         | 45.7407938943718 | 34.6551521398176 | 41.253645578517  | 48.6441988290952 |
|         | 46.8873421271259 | 36.4351122729314 | 40.547835538778  | 40.9149601380325 |
| SKIP    | 42.7150227340364 | 47.1332119496722 | 42.3536549114165 | 51.5913529948887 |
|         | 54.4586176399381 | 47.0027453663546 | 54.8074655158941 | 46.1673159982664 |
|         | 45.2897806651929 | 38.4187686307607 | 47.299647867533  | 47.5025821041537 |
| SKIV2L  | 343.764108830519 | 286.045253557021 | 451.290681710534 |                  |
|         | 205.413872130332 | 313.921236120658 | 187.16833117416  | 292.735673136799 |
|         | 317.004252313348 | 218.958199087236 | 283.695442036373 | 290.535354193244 |
|         | 237.864776225441 |                  |                  |                  |
| SKIV2L2 | 160.442808769594 | 134.407474121421 | 137.176719695561 |                  |
|         | 125.484233748017 | 129.270792739554 | 203.353724675525 | 108.147548794301 |
|         | 132.663052961193 | 148.844652125095 | 127.937436596431 | 167.16650846037  |
|         | 211.868223638158 |                  |                  |                  |
| SKP1A   | 255.800286504974 | 279.125471103327 | 256.843419520398 | 189.80672643731  |
|         | 228.499788774214 | 329.72032366183  | 196.465477936749 | 277.731146253511 |
|         | 317.777971035617 | 229.512022912803 | 274.648263378054 | 360.15483218921  |
| SKP2    | 101.642226298918 | 261.826480747537 | 163.38302606725  | 73.5025309968566 |
|         | 297.662970257144 | 121.37214545992  | 576.830397705584 | 406.964801954621 |
|         | 214.586915093492 | 136.686164935569 | 132.604567913122 | 138.67794356779  |
| SLA     | 58.5450868286167 | 54.7260785901194 | 75.7801512652102 | 354.38923772101  |
|         | 54.6820069269589 | 78.4988338361054 | 51.4349390827895 | 57.1362071277099 |
|         | 40.7423597075637 | 49.7827734675743 | 53.3599118256673 | 62.5447504571181 |
| SLA2    | 41.483412492426  | 41.7614975630362 | 39.1799070031819 | 44.550322123994  |
|         | 36.6850522695274 | 40.8634043028528 | 35.9350286877524 | 44.2159020605784 |
|         | 38.0213051227859 | 35.8914040545805 | 43.0710577955487 | 41.7072675309997 |
| SLAIN1  | 41.187562301961  | 56.4199442234707 | 54.8133029594319 |                  |
|         | 45.1151758109609 | 41.6806984441849 | 53.5090984247271 | 54.7105548454293 |
|         | 41.6466169548846 | 45.0666179335087 | 55.7930787690756 | 52.864136882462  |
|         | 55.5712957590038 |                  |                  |                  |
| SLAMF1  | 47.0940613507321 | 60.1685144469519 | 60.8942621888353 |                  |
|         | 331.824390642864 | 43.2484996523549 | 47.7556758818053 | 46.8613212048981 |

43.5544347011646 42.5406888281114 49.7259371799014 43.9450023643394  
40.0557788909923  
SLAMF6 51.6558970571712 76.7254010150417 89.1115172961797  
242.8665988001 43.7783560914188 41.6590564937735 47.9665737016961  
57.7125861123012 36.87840425987 52.7288095750893 61.8683444248482  
49.2064066614865  
SLAMF7 43.0001432913058 39.6123051184545 47.0055981216687  
58.0218262176065 38.1644569189523 40.3357777530419 42.7431359850339  
37.4484310268909 40.4997186069494 38.0078357808393 35.5179217192467  
39.0536056496869  
SLAMF8 71.3900857589616 51.2405397507224 68.9522412475296  
210.005571009784 44.7829632472754 43.6670755115848 43.6753843488695  
46.0633179231318 44.8997235283254 41.6373771565199 44.553780984244  
51.6660481331154  
SLAMF9 43.5710871617107 40.7952353240579 42.2577689927563  
68.4261608261522 40.5710637884029 40.5281496800812 42.357910063876  
36.6452480995946 43.5669306063196 31.6981395162348 40.547835538778  
40.4639532172338  
SLBP 74.9491421278749 143.068901273486 104.557637353314 100.606802642042  
121.84142967836 130.716532316693 178.496935603128 62.2982003555312  
175.74424749223 74.6134978387686 79.8060175739284 106.878946016737  
SLC10A1 40.7609952437622 36.5219488315447 36.6522278218553  
38.9534635879195 41.1868052124344 38.8336427948187 44.2166118829877  
35.5798430594271 40.2274522635576 40.2112371512838 38.8507804383261  
32.6203270051744  
SLC10A2 47.5647821785529 42.3550738181144 41.528370959196  
39.7411455670172 44.4489662507893 41.3553369544097 42.2577689927563  
40.4359177791566 40.137818555383 35.8304004211528 44.9713479185144  
45.1735152121056  
SLC10A3 239.229093340475 220.010492114456 241.017227991238  
220.11066803442 331.935072199058 254.159017331462 206.989423961124  
241.952522667413 241.736113354506 265.545792706874 261.260859494893  
205.121208974511  
SLC10A4 40.4639532172338 40.5400384479766 39.8299340037009  
40.3180310664156 40.0599807618105 39.066284740632 47.0874209746031  
40.5640952422779 41.2870505273664 39.9519547348106 39.4749602565407  
37.8490162439785  
SLC10A5 37.6397652536077 39.1982470626863 47.9035532886869  
40.1804147506786 35.1411239266238 39.0266821712099 38.5066108855005  
40.1474543172332 42.2577689927563 40.6022003765153 42.2618615571566  
40.5703581862752  
SLC10A6 36.1232327599945 38.5252456306656 37.7384958256497  
39.6292788039793 32.9756367838345 41.3553369544097 35.9058393060637  
33.8558232866797 34.226171989766 40.5090849993014 36.2435874904689  
46.5650556481721  
SLC10A7 51.2851682978581 60.0105984819248 66.1541420734416  
54.0332376648108 63.2936377704897 53.5090984247271 45.5506835119207  
44.9631458622215 61.2153068100932 44.9673049606589 54.629382710848  
52.4351670989268  
SLC11A1 113.539485042978 54.5374188496807 60.9987978554263  
555.356799014777 71.2787833369055 80.7563265626648 154.93193897888  
50.8160430472218 44.619512785899 41.2276963324981 43.0710577955487  
53.4735821194294

SLC11A2 734.143790759359 365.723799716137 518.732175662818  
491.468862309918 459.546279672649 277.244576031507 553.328261478032  
815.810781070699 528.840700144811 567.534792333871 442.99540222483  
449.701353531924

SLC12A1 43.3638918705225 40.5400384479766 42.4580504587581  
41.5464765641928 35.2163900400329 37.4782441311626 35.3362091871364  
47.8947595316832 35.7973685350741 43.844855336215 40.4504608195666  
39.1553169409075

SLC12A2 81.0295607064541 106.035435807364 80.877536389008  
55.8709511400674 76.4439037944547 69.493532577364 49.3854238365325  
85.2849531543957 67.1702819938085 60.9905272201951 77.9493708990494  
81.0169370911764

SLC12A3 37.4554876386402 37.10170285405 33.281531405287  
43.3078542962968 35.1411239266238 36.4986986135769 35.9058393060637  
34.1806289878747 34.226171989766 39.2623423164488 34.064698871541  
36.5474283500601

SLC12A4 71.6849360818041 63.8399092891728 81.0295607064541  
69.6511571901941 75.9909523932333 90.5359675350156 71.9474405671289  
70.6568303458436 61.2510119532409 78.258486366912 81.1350396749303  
91.9534828522538

SLC12A5 40.2543341073001 40.931294690669 40.4882741869718  
40.4359177791566 42.3536549114165 43.0860383229288 38.8417151851134  
46.3685439301234 42.1089765085639 41.7932258301997 44.553780984244  
39.3789825717286

SLC12A6 41.4508241771315 43.9783383422823 39.7411455670172  
72.4834467838798 41.7419877611072 39.8455060654531 41.253645578517  
40.188873541274 41.2424637338424 45.7371044724173 42.1537476443423  
42.3117490140079

SLC12A7 38.957687788868 43.5182502375207 39.6451483836089  
35.49696651597 41.2740822675592 44.8872784170036 45.8980298854198  
46.1673159982664 40.137818555383 40.7063426028871 39.4410515050885  
37.4554876386402

SLC12A8 104.335120306753 59.4908919662362 66.9239565096247  
99.2432911346944 86.033725825968 51.4931742685391 68.1125016199524  
63.0748373122119 63.1944558106132 52.7972156492746 47.8988096575648  
43.7672102682067

SLC12A9 386.00975855841 374.026381773215 780.708896888794  
455.223217772744 696.113365766871 233.90802199627 217.848539722853  
333.421080658854 329.763197973922 319.043862813161 328.855843739232  
224.320261187595

SLC13A1 43.6706764143908 39.6123051184545 41.9287023391451  
43.2551508830106 39.4693871570028 41.6178506967511 45.5629520869561  
45.4352530863365 39.2809305246091 45.4882438975269 43.4424616940528  
44.1861590259178

SLC13A2 42.6036491382658 36.0366673493555 36.6522278218553  
42.6913548400127 39.3667161654772 41.0582900711341 34.1889222434768  
41.7419877611072 39.7537274655115 42.0621425894624 45.1432412071268  
39.0536056496869

SLC13A3 50.9909246164766 51.7739270955254 49.8845794776469  
54.1240583139871 67.7155610106537 54.4753345912615 55.0404566626821  
56.410923639913 51.1483696410762 48.6124127998952 49.8393069675192  
49.7637977162152

SLC13A4 35.6111578834671 49.7363778831003 43.0971787292711  
39.853175885492 44.3557408297309 41.8613406887824 44.6032218589199

47.0940613507321 40.8970401536578 41.2276963324981 42.4580504587581  
40.7704587752083  
SLC13A5 44.0328992213727 40.148780650831 38.0452862258803  
37.29566077996 34.9062568194127 36.9060997041453 39.6535880152834  
48.9826868640753 37.1820543575123 39.1621898366355 38.745552403895  
39.5418280570561  
SLC14A1 46.8712941728147 146.355277438643 176.785214225094  
44.0451487108213 128.937837181433 50.6915708372926 83.457269041228  
174.685146336531 400.973553604192 239.425856083354 369.717462266442  
575.268446033282  
SLC14A2 40.148780650831 44.1239711172417 45.063792968927  
44.0451487108213 46.7508829977587 48.0350549043063 46.8613212048981  
41.6466169548846 42.4540072551568 44.4652605017595 46.2560238004757  
47.2131144508464  
SLC15A1 52.4179224871914 41.4508241771315 43.9450023643394  
40.9607305725196 42.3685136297603 39.2248354955045 49.540449125788  
47.6952179922944 48.8067321016961 38.528621456378 38.4689132737495  
48.6037684272115  
SLC15A2 49.3463416794995 52.5380506348717 76.1493261430901  
56.9299697426319 54.4586176399381 44.5544727111028 62.0404348860702  
53.4109882045447 81.4783226003925 54.7827221235949 57.6171094774963  
59.2035499250243  
SLC15A3 485.698327133705 331.935072199058 415.15150032168  
1771.43541011426 155.712392689325 438.034341389969 439.106576928682  
263.587821561589 131.126942328593 140.199798713912 154.19962858342  
133.067727272864  
SLC15A4 199.687268345276 205.772128732705 204.992039590717  
502.205366225368 142.789889238338 191.141778714144 181.873969432903  
118.450965500771 157.830518171698 166.951916348418 203.651890041185  
186.795349445177  
SLC16A1 40.9558083259517 43.8495248991589 43.7630587657205  
36.7892997857376 44.7829632472754 41.4508241771315 37.0564573649223  
39.6474008369935 38.3418933808844 46.6598879466655 32.9879066304034  
36.9976231206067  
SLC16A10 100.159565926265 51.3084273211359 68.0649030501515  
821.013687795434 94.6432868887401 71.2787833369055 154.811704749343  
376.840175928841 60.0736861987141 62.3997407955361 50.6473771879221  
65.3585701203568  
SLC16A11 42.0532901689036 41.0678614026819 38.0452862258803  
47.3574589211166 42.9090346219023 43.0860383229288 38.4005795891396  
39.2672712041774 41.7627910693483 37.7315666632629 45.310660704531  
41.0657892043496  
SLC16A12 2488.32876359853 1493.20520979227 1881.7281441986  
1864.63057767867 1366.59129560817 1017.1803754111 1810.67209360676  
3153.71394627237 1190.10462185567 2440.77408185413 2474.22199172028  
2160.22713775462  
SLC16A13 38.957687788868 42.6022652963326 40.8420925848403  
41.4273122914951 42.9090346219023 38.8336427948187 41.4742337714895  
40.1474543172332 45.0017158586743 39.5637454855233 35.860430241131  
38.5279745308203  
SLC16A14 49.540449125788 49.5443425465542 62.6074601128958  
47.6687908290818 44.3557408297309 49.4157684139858 53.0932869234775  
59.1533197797534 58.9469577494939 49.5635427311883 49.6706535876636  
49.3654837541353

SLC16A2 63.1291723738553 52.1967540852276 43.3085358214154  
65.3191216270241 50.6470461863549 71.0645521832919 45.8980298854198  
53.2046867327331 52.8502823653368 61.7502624458447 57.4622430729629  
50.4847465816184

SLC16A3 1769.18069954113 621.980260052085 681.474524031866  
1806.22468459769 523.679443405512 261.826480747537 1001.99175009124  
639.778130093087 1676.22158135012 268.265540230814 281.262083731954  
434.223722811041

SLC16A4 55.6268253440479 42.9020321355927 65.7002710293248  
43.1275490164761 44.9384441371181 57.5570747859662 40.2154497375715  
43.8694505312625 37.0526522140242 42.3606390470387 44.3440839686558  
62.6459502069189

SLC16A5 97.8141040140486 129.605603092944 248.563278344035  
85.5135159896819 64.3571664944642 63.8740412329753 81.6458112867541  
192.509049577236 85.2805684630976 239.885284409329 310.821299796803  
261.687486828996

SLC16A6 44.7044140979108 44.5152708955623 45.8844325913247  
108.991044950132 50.8875036861067 42.5660695551615 52.8496345990125  
69.0819394834919 53.4604353973381 36.0481934423077 43.9450023643394  
47.7962548556026

SLC16A7 43.4626049853157 39.7835513496873 38.6727842796202  
42.8235313007746 40.9950639693255 47.6803619768589 42.8684958525042  
41.0381860307445 45.2897806651929 41.6373771565199 40.4504608195666  
48.27609330316

SLC16A8 38.7537364570873 42.8542642792862 42.2577689927563  
39.066284740632 43.1252272136667 38.9378717994178 44.2166118829877  
40.931294690669 43.4656637536244 35.3849221682845 42.5426057453993  
44.9070250604284

SLC16A9 43.844855336215 641.462632112151 174.216025744156  
42.6913548400127 52.9433495155796 92.1151486847283 70.2635892414678  
61.7572675712557 121.650910373947 70.8749669449099 64.1267046511632  
59.6757573886627

SLC17A1 28.8989112359112 36.0366673493555 41.8751578329365  
34.4382958501338 36.2048942610546 40.3357777530419 39.5496902678788  
36.43924066428 46.7760357462635 41.7405682794166 32.406093465115  
36.8690774823319

SLC17A2 40.148780650831 35.0222940937513 43.1931731665131  
44.7980740332174 38.6454098044474 38.1169703906207 46.7100796279384  
42.2577689927563 42.4540072551568 39.0648733099061 44.553780984244  
45.2783024981315

SLC17A3 47.8249696958403 45.8669209716694 44.0451487108213  
45.1944222548351 45.6895223823001 45.2852528185486 48.1747307200218  
47.3791873993182 42.4540072551568 49.5265949137207 42.911855821602  
43.3744503319109

SLC17A4 39.7576136507593 40.716553247236 44.4311655729487  
38.745552403895 35.6434124419782 41.3553369544097 40.5585676679482  
38.6454098044474 41.863927676552 37.5343260962758 44.1148826235374  
38.2350720635382

SLC17A5 45.6517320730042 43.0971787292711 41.9666541498638  
42.9358255168086 42.4864576619427 37.9003288112261 42.7431359850339  
42.0494116081998 41.2870505273664 49.6203214143464 43.3085358214154  
45.2783024981315

SLC17A6 36.0144420013819 43.1805016690297 38.9790184198145  
38.0958223740111 39.6535880152834 42.157627240486 37.6036146841933



38.8495095797881 40.2274522635576 35.3849221682845 40.1742127891824  
36.9976231206067  
SLC17A7 45.3872406432794 39.8695929627783 37.3687900733549  
46.7577982595088 38.9496515344837 46.3715909653832 36.634024014558  
42.0494116081998 41.5635499110307 44.2580151149956 43.1931731665131  
43.4709415392696  
SLC17A8 40.5654775358427 39.6995529770239 38.5045333213784  
38.9534635879195 40.3452320167286 41.0582900711341 55.0897019602305  
42.157627240486 41.4636047919453 55.4037482627222 44.7926323492519  
46.1592873342534  
SLC18A1 45.3872406432794 47.3536182445315 43.0016969050339  
50.5310598656998 44.2120774064277 43.1180113655693 40.6216891610774  
43.6434576713809 45.9732108120834 46.0713306971594 41.134180463103  
46.8840006833906  
SLC18A2 41.0608773166058 46.3635803515159 44.696023817801  
40.1804147506786 38.9496515344837 50.0748292497578 43.1931731665131  
42.2577689927563 41.6616444147804 42.3606390470387 41.6336636285875  
38.6454098044474  
SLC18A3 37.3463875295726 39.0102066700839 38.6005272730664  
33.9645433044281 38.3561682218911 34.6977013306396 42.0605906240248  
37.4484310268909 37.0126425326534 37.5343260962758 37.0180934800573  
35.7451401627836  
SLC19A1 60.562215295948 81.909815795953 55.7764940944098  
76.450993090133 117.574549567 69.1523164481201 70.5534237141767  
89.9227845135785 77.5480089703916 51.6778366958973 71.9162507601624  
49.5539622682049  
SLC19A2 49.4151347850687 44.3529919625344 45.063792968927  
61.0845101400379 46.4343327861696 43.0860383229288 55.9276266345493  
45.7476095696859 48.7358147030082 46.441301934328 50.6473771879221  
43.2776458914333  
SLC19A3 37.6397652536077 38.0226905622357 36.6522278218553  
54.1240583139871 46.0043807840705 53.7442594289333 38.5066108855005  
46.8954576545929 37.6383530120621 41.1222709786153 46.7386599624801  
47.3172462673426  
SLC1A1 40.8681871019812 45.9266745571724 52.9111155236961  
46.7577982595088 46.9906120932727 48.0350549043063 40.6750540874299  
44.2159020605784 46.1101825640108 54.6089451252049 47.7535797917441  
48.7814131120945  
SLC1A2 32.0823591288671 43.0971787292711 36.6522278218553  
33.1817617228171 43.3332476888305 45.6129956328415 42.0605906240248  
48.6441988290952 37.3600014814388 36.8059561571675 34.064698871541  
40.7704587752083  
SLC1A3 149.45630414346 54.1773909134233 123.597489107285  
362.506098778318 248.963785838427 159.416887501941 87.6018870099686  
149.792346524401 64.5347406608537 83.764882413379 97.8825824657468  
93.7924763988692  
SLC1A4 64.668912004173 67.0402749076279 80.7338782543351  
107.478392667404 60.2886873195135 50.8533737532786 59.5205055437765  
61.9787117490846 54.5952754712007 50.0564735608363 47.8988096575648  
57.8111054584154  
SLC1A5 203.759116151774 219.134220280612 214.100443708064  
126.911056987607 261.687486828996 152.17335005192 257.050603883498  
155.099281008688 441.976123154763 742.317490569544 796.359355922952  
650.328627263899

SLC1A6 49.1868644496737 37.10170285405 40.0998167098057  
39.3750969348308 36.9060997041453 37.2686490268265 36.7356360093603  
38.8495095797881 40.0403898620771 39.1621898366355 36.3390947880186  
35.1451084093692

SLC1A7 40.8681871019812 50.4022543872993 62.3245608177257  
43.1847628331565 51.6869155634183 37.2686490268265 43.6753843488695  
36.6452480995946 64.830448408529 51.8412522234186 43.844855336215  
45.5800840647989

SLC20A1 643.491217668415 3217.83121827744 1048.98028527123  
1275.78715071615 882.105892529265 399.66182195331 650.328627263899  
1247.50618540769 580.109585240053 1319.32406112346 1349.09482344633  
1184.75786736273

SLC20A2 144.39665228854 245.888237156849 158.081235081686  
96.0770202999531 292.600202149564 189.035121001539 260.383969219887  
174.416924448198 122.301290485889 386.934057829091 334.813163079302  
246.568253751149

SLC22A1 44.4639405506967 41.6466169548846 39.3709357615493  
45.1944222548351 39.4693871570028 39.0266821712099 42.7065584433947  
37.6557714476853 38.8495095797881 43.3465699185405 42.5023941254529  
43.7672102682067

SLC22A10 36.7356360093603 41.1090481599939 38.8437052820213  
38.6727842796202 39.4141123790339 37.3377031071126 40.3622285487287  
37.0011886211643 37.9693705999276 35.8304004211528 38.0334163721268  
38.0046881238176

SLC22A11 41.9407041937973 41.9894412416874 41.437237454134  
38.9534635879195 43.6587492470348 41.4508241771315 50.5252048155459  
40.2382908228517 38.9834959368496 35.93950183586 40.8225507267584  
42.9887069977696

SLC22A12 41.8792703207442 41.2598458726002 41.6079958749402  
41.253645578517 38.1096479110295 42.4263859458031 40.0557788909923  
39.9084621723809 42.2136642947793 39.5317722761104 40.5084378738092  
41.0269624684418

SLC22A13 43.5710871617107 46.1569135229922 44.8872784170036  
49.5424425850549 45.9104478407175 43.6670755115848 45.1017494688414  
41.9315419791594 46.9739160257217 47.3791873993182 43.7585538437696  
42.4607795638552

SLC22A14 42.5193208629123 44.8529259387308 40.301483914446  
39.7411455670172 47.5647821785529 39.6251842352088 44.8643898647322  
48.1591264215184 46.2027193115397 42.1622837416589 40.9157352260901  
42.6758568421347

SLC22A15 72.3388488936832 62.4530276414691 62.8362064074814  
108.660169650259 75.6471706262645 46.6872654833579 55.2088411137193  
59.5830868881343 46.581796165231 58.9836017745712 55.7868713984479  
56.5225014032155

SLC22A16 45.0985088502363 36.0366673493555 43.401782064778  
101.144615206297 40.3452320167286 40.7616966228404 40.3302268293707  
39.1652965788406 35.7973685350741 37.920964499903 45.7328341667151  
37.4554876386402

SLC22A17 89.6056978251991 66.2366101899356 78.7496673195407  
64.8154690917175 79.9161139112432 177.80178351875 72.5288683768049  
112.977333058979 60.4564459263716 129.887275668509 164.373677562376  
125.512567429299

SLC22A18 115.155021677978 118.651855622915 115.052948380817  
129.525395445221 97.0813208326187 66.6702048178108 101.549779766678

125.90746674767 124.44575078108 120.046457114882 93.3718038663074  
99.5531381996521  
SLC22A18AS 77.7665223272661 63.1780854659428 56.607199625498  
145.676955166566 51.3511088648386 58.7404123614695 46.5650556481721  
61.9787117490846 66.8632294055679 64.428683021978 42.0750889188255  
40.0557788909923  
SLC22A2 43.6236257870216 41.159706131351 41.467005949568  
39.5748670524951 39.6037514046494 40.040778349137 37.6527901109005  
39.4987030972173 38.5019918517688 38.3548158963731 38.5306320917724  
40.1272810917202  
SLC22A25 37.1485601150873 42.0709558258414 34.8956628705329  
32.7960913111995 35.5220586859301 34.5886782974123 35.1307934330047  
35.6825474397235 38.6322728994674 37.2089297656361 40.6373400186325  
39.3575468494941  
SLC22A3 45.7017023767682 39.5050383901884 40.244271403831  
56.8404854356062 43.4544762830742 50.4022543872993 44.4639405506967  
44.6560353921013 41.863927676552 52.5522545249206 53.8441980932644  
58.5759178381027  
SLC22A4 57.50915811428 46.1569135229922 55.3122077514658  
137.831070407907 46.0043807840705 48.4758590019384 65.3694267397114  
55.0698932795613 46.581796165231 45.5776159432079 48.7502645382856  
50.9506778292488  
SLC22A5 67.8774399765179 74.621822948059 123.444247442399  
76.2591822114739 69.7413896580273 55.540888910486 87.0685571351947  
142.066425511614 108.654797121478 225.960701908311 200.174103125152  
151.815294281745  
SLC22A6 44.7915315085948 43.4396866157171 41.8389336728199  
46.3203995372658 40.8873907150245 46.7386599624801 44.4639405506967  
42.2577689927563 41.074824727477 40.6559419616644 42.4162492820012  
41.3481355128089  
SLC22A7 39.7342718293432 42.7261365779149 44.2405728317107  
42.1679276329916 42.7475279082279 39.7394181011603 42.3360569471619  
42.1812299265547 43.0496526069072 44.3327557837122 40.6783687486496  
42.8263096141654  
SLC22A8 32.6285977114039 36.2103905554984 41.528370959196  
40.1804147506786 34.0045980663271 42.5660695551615 34.4570158133896  
36.7460922671619 30.6485078361448 48.8623729374733 36.3390947880186  
35.4484652445078  
SLC22A9 38.9271399577966 38.8336427948187 38.941855825269  
40.646702696033 39.4693871570028 38.9378717994178 43.6753843488695  
41.9820792173615 35.6139301508335 38.3092241935352 40.3180310664156  
40.1235656101329  
SLC23A1 51.342502154612 47.3010040326346 44.5134109184888  
50.2163892855092 47.7508139534968 45.7700386532539 46.4388841354122  
52.407151732257 48.3954967265007 44.7958122466628 47.5733603903505  
40.4261913313642  
SLC23A2 52.3432130135266 112.591529656786 90.8831233784641  
61.0845101400379 83.5767232665142 58.6439719071099 77.9820921829024  
87.4239220649478 56.3441077510744 103.14577985944 80.4895102121889  
109.456162739433  
SLC23A3 61.4884606677516 98.3240331951021 52.1242102345408  
34.3595588146954 65.1757400078647 43.7630587657205 44.6032218589199  
58.4200819624972 47.1744296124496 61.2604442862522 54.7061116419212  
59.3709786862962

SLC24A1 54.931538325692 59.5534127075228 45.4865173433646  
48.665578118898 53.5594683028749 56.1671440556142 64.8367546135053  
60.9009676344258 60.5608545741456 65.0928075335306 54.9765783642973  
60.1837189855762

SLC24A2 44.7044140979108 42.3550738181144 41.1367478979484  
45.8844325913247 40.3452320167286 38.6414316877471 44.7255207589606  
40.6171774724171 41.3803269429468 43.7303813515864 39.2542963855807  
43.8575940017119

SLC24A3 51.1055541075029 42.4493032770053 58.0218262176065  
40.1804147506786 44.8897737954573 82.5956705829173 40.0052661202207  
49.8344973836834 45.9227107476843 75.3333024462557 58.4816190076338  
62.3470274683312

SLC24A4 41.1523487516364 43.6573598365877 44.6524308640784  
52.9316102541089 40.7369744663513 43.4290452504928 43.5898425390297  
40.6171774724171 43.5000769365019 41.1222709786153 40.6783687486496  
42.0424641526302

SLC24A5 36.8072833828297 35.8227939208521 40.931294690669  
34.7266486944713 29.9775071862804 40.5281496800812 37.4772922422734  
35.7973685350741 49.7336769474446 45.5776159432079 38.079222289614  
42.1537476443423

SLC24A6 402.571146447946 194.703024752864 161.109600577001  
228.21982974423 230.927097824131 160.234018459018 179.886168478179  
148.514056973195 211.137455821181 165.706343725482 158.702003835578  
169.603165827302

SLC25A1 405.674543755994 554.551745559065 442.99540222483  
209.497482517298 267.232315058148 213.140641182603 507.620619345969  
410.979796414875 699.488969175268 312.469507672374 334.016152807947  
242.546821017091

SLC25A10 108.323780226301 75.41408189458 73.7945470201829  
37.9875302985336 131.156876010639 61.9432904657734 157.463465828715  
134.664025291418 243.27954361539 103.968071466212 92.4619796591359  
67.1675878355908

SLC25A11 82.5344501505114 68.1040271620925 69.11736279512  
71.9062462001972 71.4183281327686 79.2701322339022 75.8779316255794  
82.6246523811721 61.9682048429354 101.463033319045 96.0126406688619  
56.6888826857797

SLC25A12 76.7820250461545 90.8550873130713 132.107655569343  
105.934378627264 125.052841200703 173.035987237848 41.4742337714895  
71.0593419018503 84.4938528830721 152.187430924861 130.775349446374  
120.866081604277

SLC25A13 90.6805895192707 144.239350177363 127.567860003773  
162.151812425949 155.59062961332 72.5482509922085 142.273273748244  
146.594288395595 201.530434441408 101.58345410371 102.304422999511  
105.05842887748

SLC25A14 79.3889841821749 80.4060693489113 68.75304552302  
59.0262390168156 79.0442418260005 63.4323398447015 77.2154078285418  
91.0154871536701 67.9176876913772 70.7003843117511 60.5608545741456  
61.6311118308635

SLC25A15 88.6663961027926 74.9956591643367 63.197604174872  
61.8293674397954 89.1771576058145 51.6053353177789 103.843452083296  
81.9218437790485 83.9004792286435 51.2786187688564 53.6895401581575  
56.6888826857797

SLC25A16 52.6364613846829 56.1355483199198 54.1637401903523  
61.0845101400379 41.467005949568 55.8243694410835 48.0283573444179

58.1521928484154 70.5699797830702 61.5112659162073 48.2573234404682  
54.9919060580109  
SLC25A17 62.4317959077388 58.0218262176065 62.7605715573218  
53.593974682612 53.4109882045447 58.1798515131249 53.4921736109774  
62.105802634526 63.7046039657949 72.7502212566295 70.2215218476683  
69.6021553604792  
SLC25A18 76.5505585423421 42.1607322031054 40.7620472083159  
50.7046706880325 45.5809132232681 50.7516773099639 39.4600924554505  
43.7396619462033 42.2577689927563 42.8936990772838 45.5707650534259  
41.7575097298927  
SLC25A19 89.3989848564067 100.205124008648 58.112348043634  
156.476627024647 112.990752518897 62.0660509811111 110.837476359817  
87.6435494489518 78.7182388025668 66.274247400793 57.4622430729629  
47.3992733452821  
SLC25A2 45.1912496459517 39.1982470626863 38.4043916290561  
38.2041059863839 43.2484996523549 39.132725377815 44.7255207589606  
37.7612949798895 40.137818555383 42.9866214102525 44.1148826235374  
38.5279745308203  
SLC25A20 59.9546218258435 59.8273072817267 83.757054871222  
105.45765455249 68.0414563597154 69.6975740412402 51.0572809855463  
69.7242825662275 69.8231400816467 71.5032996449402 80.0651801266824  
73.3321469094819  
SLC25A21 37.8386378737561 40.0527893189096 35.9305494063137  
33.4819739460148 38.4540849632254 39.9397419279057 36.9355798143571  
36.1375121409002 39.853866204927 35.2880714952489 35.6041926503637  
38.0452862258803  
SLC25A22 78.1313732870053 183.854020356927 145.883224917856  
66.4047895961325 135.19133529995 64.9498081060676 135.737771384104  
85.5316122504411 153.940127525369 83.3729277601518 93.5982028088194  
88.6771566133367  
SLC25A23 288.284384035759 315.186937216422 297.332750143067  
262.37779288036 403.664724682094 1107.96086673001 112.281286038716  
287.981727851442 336.44013572926 1017.1803754111 1096.1705171588  
891.080174768895  
SLC25A24 52.109723558511 63.6589494264095 60.2674188885735  
50.4733460479197 55.6991707857987 57.934622029119 54.5593748585832  
46.1081155967151 48.1513101664505 41.3581040307311 45.1735152121056  
52.4389766266802  
SLC25A25 108.447037611705 112.340869310085 76.0240426902567  
93.1067450332473 80.1294564809102 316.327885002562 106.020559220488  
196.322377166278 74.2727109491988 74.9820339135242 85.1920126487447  
111.42402759245  
SLC25A26 56.4819802857598 64.4588422949237 71.9329028989527  
59.7044210110693 76.5375674421131 75.3174199658042 71.9805290614073  
57.6034762511847 69.9767092409915 56.4830459131476 59.9864333404414  
66.1229691315616  
SLC25A27 44.8914371498528 71.5726787111921 55.6865353018811  
46.1673159982664 67.6011992144113 81.5782824513693 51.3064929551674  
46.3685439301234 57.0301170427216 45.4614234442527 72.1090339831747  
62.2025996860055  
SLC25A28 268.745928429069 419.993482471924 672.759115794267  
352.997455210484 499.744856832174 670.958499409833 321.359569119182  
260.740251007349 277.5073518536 675.079525434102 580.444451816014  
605.970682363975

SLC25A29 139.590367312743 74.3239491140189 61.2679059816982  
62.8201270538435 68.3419511055057 60.3254877099749 94.6130003107132  
88.3335649692467 95.0917871457813 85.2364387652201 65.6010220593397  
69.9144520559912

SLC25A3 575.268446033282 977.776395810338 1202.11455437028  
775.931494648677 1513.74711975248 1254.34397143795 837.959914510114  
560.954913956997 1279.02702402372 987.427672417105 815.810781070699  
885.224377292125

SLC25A30 47.3791873993182 43.5873188565519 46.6588655218735  
41.0726336841311 41.3755760434934 47.4699236780425 43.6753843488695  
42.9301944191913 43.0930293831497 35.93950183586 42.7275315121163  
40.7704587752083

SLC25A31 38.0089018744739 43.0227387991135 40.4882741869718  
41.0726336841311 43.2484996523549 42.4580504587581 35.3362091871364  
41.4508241771315 36.7267557061938 42.2614524730856 41.6336636285875  
40.4639532172338

SLC25A32 38.6454098044474 40.0527893189096 36.5474283500601  
44.7980740332174 45.9104478407175 39.7394181011603 36.634024014558  
44.1311654985682 35.7973685350741 41.4397539024976 41.5421429082231  
43.9541718254769

SLC25A33 36.6480005877129 45.2556760873335 37.9482157381008  
36.4564050256915 37.2567512265363 37.8102105794655 38.7337086062875  
46.695848687694 36.6312676076142 35.8304004211528 39.153226699662  
43.7672102682067

SLC25A34 38.5648843914189 51.9421032049606 52.3432130135266  
50.8567345921473 43.1252272136667 57.2767879969284 38.8417151851134  
48.6441988290952 52.9482338979681 52.0999467564713 51.7538628098347  
51.2318935933116

SLC25A35 54.7786516309154 59.5534127075228 66.4079972657486  
48.665578118898 67.222434502867 46.6872654833579 79.909124697198  
130.261747462753 55.4030910454028 70.9702772728923 90.4909052059366  
57.6860752168769

SLC25A36 80.4479092568961 75.6614221167993 70.8606919488782  
64.3746985855249 123.04622719856 96.7474444319428 80.5457814044192  
68.6704961638492 70.7238101239421 55.2214187655851 66.9494774452406  
82.8275497073451

SLC25A37 553.328261478032 120.943323740458 264.004717858009  
878.863554510943 125.333208461509 187.560170529807 327.631923082696  
107.792406701643 83.757054871222 311.668075784386 199.035083736742  
212.945601743319

SLC25A38 100.83436298853 120.299244758783 103.746508465792  
94.9785931907153 361.776841675393 132.684895918889 163.62024333166  
115.894467332637 128.327641457403 213.309547409053 177.460053912279  
127.694844372277

SLC25A39 1320.7894611262 1090.86617066541 1149.02954135912  
610.502562878788 1975.28674300761 610.502562878788 1164.71243740122  
1236.32289322872 1769.18069954113 668.961646543849 783.440408023061  
525.35784336478

SLC25A4 316.660303090646 298.54401957868 271.50380898418  
117.3417887148 399.80505620721 912.757335169259 337.51861578231  
233.232472394727 317.892699374852 365.723799716137 450.008356194664  
727.181489302632

SLC25A40 46.441301934328 61.73650350626 72.2797007105795  
93.9228336493696 63.4753448572245 58.0095518210499 61.3149617644002

54.9919060580109 62.7977686460693 47.3010040326346 47.5733603903505  
58.0036637795404  
SLC25A41 36.3649677956953 42.5269793679335 44.6032218589199  
43.8002456102021 34.3633615460307 45.2852528185486 40.0052661202207  
35.4526946152955 36.8127605061228 43.7303813515864 41.2598458726002  
41.5536168238478  
SLC25A42 76.9454624478854 108.213380368446 147.269661124015  
104.8505815954 200.174103125152 118.115557136662 82.9431583622036  
186.984157187427 95.4162505381269 150.529917336161 133.549684980003  
101.935321521672  
SLC25A43 113.632855481549 142.49850553035 87.4239220649478  
136.891616331257 214.51120218554 134.152059562322 173.343091136741  
218.701583105141 151.494249413592 119.015431849218 98.3322659713024  
98.0023132593711  
SLC25A44 201.941251308732 139.022985518859 195.672836308456  
150.801729138762 215.800662077432 147.945429978177 126.500059295217  
164.312946712409 177.261319004133 171.1557159962 155.050936910986  
137.696331574552  
SLC25A45 44.1737502492846 39.5050383901884 39.0775870687758  
42.1273928203021 38.1042454705119 43.6670755115848 41.8315602975157  
43.4885245598939 41.6340461942423 43.1839109702714 40.4995052849302  
38.8495095797881  
SLC25A46 138.972884942374 117.239774193934 110.219274023648  
169.818067865324 150.572774995368 134.994839576312 85.5027511448958  
141.69593269802 125.777874890962 89.6670947876322 88.3086070495983  
117.520762118299  
SLC25A5 2036.72286752819 3602.30252142918 2581.34849558524  
1649.78627644882 4406.55576617324 2206.44541412808 3010.38998829232  
2248.64628069362 3726.73487426505 931.401929277001 1372.51401036753  
2559.659041589  
SLC26A1 40.9222674521288 41.0212349917651 38.5477612811877  
41.0333129912548 41.2507419031133 41.6045220683604 41.1507980856436  
40.3632663649566 39.8016018354453 41.2754647986622 41.1638563416981  
39.8812234363661  
SLC26A10 41.4757223430746 38.5808034535515 44.5622847010474  
41.0273093212371 39.3100256336821 47.2009420656854 41.4244721780607  
42.7881985796277 38.5252456306656 42.7316986644599 43.2649781354792  
44.8372404608604  
SLC26A11 53.811962185127 51.1740855632044 56.410923639913  
54.9765783642973 66.5187917407182 44.9411655353314 43.5627649099623  
50.628152951493 58.5561424827901 54.2445399731644 50.617420938219  
53.6918993406754  
SLC26A2 53.1309801459151 47.9128504683618 53.3127618245672  
54.4586176399381 44.147557390293 53.4466111440611 68.5725871332774  
42.7431359850339 56.8622704143595 56.3441077510744 48.042366934301  
54.293880614303  
SLC26A3 32.406093465115 35.1224289925572 35.8265993915844  
45.0798408927912 40.148780650831 37.4782441311626 41.8315602975157  
41.9315419791594 39.0775870687758 44.7958122466628 40.9157352260901  
43.2776458914333  
SLC26A4 40.8681871019812 39.8695929627783 41.6977706798234  
36.4564050256915 33.6330903323612 36.6996187567892 40.6750540874299  
42.357910063876 37.7384958256497 37.3179578037963 36.2435874904689  
37.5556299264699

SLC26A5 43.2028319630577 38.380619572367 43.4558010540988  
42.0605906240248 44.4489662507893 41.628211174823 49.3854238365325  
49.085741080241 39.5806465938526 62.8885806455128 62.7743500747415  
58.6481644777552

SLC26A6 85.1950626054282 52.5586058896479 73.7060605978536  
65.9350437838896 87.6960277122561 44.9411655353314 48.4859552186772  
47.2864663693787 58.2108487642117 46.1390887492649 46.7386599624801  
52.6381586371801

SLC26A7 43.4100411978366 38.5921548841176 41.785676764591  
39.3455642782085 39.9283177178222 40.209110303983 38.941855825269  
43.4885245598939 44.8997235283254 40.3458948319669 42.8742421276144  
39.7844133452634

SLC26A8 40.7609952437622 44.1533327883807 49.2595762436995  
48.7646976789783 44.7359392883974 43.3219438366504 41.0808257270221  
40.047314525032 44.8997235283254 42.247169080251 41.7651272076914  
41.3948836161924

SLC26A9 39.8662795144616 36.1675792067912 38.2280071951674  
35.2535020566512 34.9062568194127 36.9660447385262 37.3523615196416  
36.43924066428 38.5682022440478 35.4457212364747 36.43924066428  
35.3116971953926

SLC27A1 208.22938545273 103.569150754726 149.639066617945  
172.789150115627 123.729687262037 166.168385855406 55.695361644141  
86.3237770387663 134.968128884298 219.616289279562 197.569816397993  
150.709301569371

SLC27A2 130.703767898434 105.902612356755 104.351256270039  
56.6458456890715 100.305262467668 50.6360662655392 148.178364767218  
161.283979969295 159.506157112627 75.3333024462557 75.6883778954949  
107.585504340548

SLC27A3 103.356071080819 131.238796973323 130.758455807465  
108.246687420741 68.4323624797175 115.044790975532 93.879589378061  
87.6435494489518 80.6434122355417 111.703187941409 100.300863150751  
87.3429006429216

SLC27A4 30.6242215267208 31.8637059340657 31.3222361955842  
39.2780515621926 26.6357008041456 34.0777108441756 33.8558232866797  
33.2467975244196 40.4997186069494 34.3674468322242 34.064698871541  
36.3454320848591

SLC27A5 42.7150227340364 51.119812302881 42.8270038153139  
44.7980740332174 131.766252431636 67.1067574196203 44.3440839686558  
49.3880946790306 62.4776210012906 57.6791750431251 65.4493288628375  
69.6021553604792

SLC27A6 40.7609952437622 40.6380495994768 38.9790184198145  
38.1421709520616 37.7576900881741 43.2805590023412 40.369768755239  
42.0847226073592 39.1467972692656 42.1622837416589 42.8742421276144  
42.1860813954352

SLC28A1 36.3134032910614 41.9548604205448 38.0931072228247  
39.1302941526825 38.6454098044474 38.1644569189523 37.4772922422734  
35.4253481674329 38.401850731664 38.5820580681358 35.0003436101724  
37.7526485343328

SLC28A2 39.6609238036815 36.9994058279362 46.6588655218735  
49.1786207920603 43.4544762830742 40.3357777530419 40.4359177791566  
40.3357777530419 43.0930293831497 32.406093465115 39.0550139257658  
41.7575097298927

SLC28A3 42.5193208629123 39.6123051184545 41.8751578329365  
49.3654837541353 41.3755760434934 37.5887129572848 46.3057385979341



37.4484310268909 39.5806465938526 42.4594149893798 38.4689132737495  
43.8575940017119  
SLC29A1 70.083473392272 91.8733417805775 103.43536623122  
88.2568398791731 125.503897988367 136.377736482671 106.878946016737  
75.8701918184611 98.0473811574767 167.095818680513 157.250548147161  
97.9497090233081  
SLC29A2 55.1306642449627 74.2180011215707 71.8706847571669  
36.6501141438378 118.806070800059 49.5424425850549 173.212430860273  
123.022511916727 138.910687241655 73.7133884699889 63.5195937348531  
87.799979434508  
SLC29A3 112.211717641877 204.229798794441 221.163225922749  
149.916892729626 111.357508398822 65.813547096222 129.965747812294  
95.9391851122771 304.133852957499 247.04098109003 222.368324930003  
121.259683158193  
SLC29A4 209.524518082089 70.3629652777935 49.6347864008749  
44.6905691366696 182.49650467392 67.1067574196203 78.7182388025668  
132.931052537195 119.872031126474 53.8260140375214 62.2200723764909  
46.0633179231318  
SLC2A1 1071.64675274806 698.105755081829 4550.56817942699  
261.138426747953 1055.00793806075 239.117228656704 798.033975337132  
495.26603220907 6089.64191751349 1071.64675274806 579.038638774301  
1142.67599037881  
SLC2A10 187.486245101512 280.034472186873 329.282615395786  
101.708164294697 203.559653641339 106.233860458285 102.711934290382  
173.11353027932 197.421622315466 171.33368481035 130.953274536639  
174.04025992912  
SLC2A11 46.8712941728147 46.3635803515159 54.7488960681248  
72.5956443098684 50.4168556990205 51.8699412145606 50.1352728306032  
48.5150680291229 48.2714618505907 54.3959011882073 51.8122261766744  
48.9019547555055  
SLC2A12 48.3814421939888 43.3458769998118 41.8751578329365  
48.309866878365 44.147557390293 110.757899996422 32.8745892439217  
40.931294690669 44.7058233759912 64.2174369755376 50.9815930710768  
60.2550788540864  
SLC2A13 34.9138625012006 36.9994058279362 42.7303139017786  
43.8002456102021 33.5412189543102 41.3553369544097 42.9803717121865  
39.2672712041774 40.0403898620771 44.4652605017595 39.9899430628542  
40.8681871019812  
SLC2A14 52.310270746917 52.8796369426118 48.8100349749783  
167.336256089476 50.8875036861067 52.4351670989268 55.9276266345493  
54.3820590274321 41.5635499110307 42.1622837416589 44.4688999098904  
39.7411455670172  
SLC2A2 42.2455707947223 40.9731067463382 40.8420925848403  
43.3078542962968 44.7829632472754 37.3799542961839 43.4544762830742  
43.1567024035183 45.0017158586743 37.920964499903 37.0180934800573  
39.9519547348106  
SLC2A3 1771.43541011426 753.491584605447 651.621028098039  
5297.71706629059 457.097617649604 1744.56688411113 1466.88103496067  
1325.2479053325 94.7110944331075 275.846698617064 374.662462104111  
436.216696884703  
SLC2A4 52.109723558511 35.4484652445078 37.6557714476853  
41.1886975241176 44.6834648302383 47.0940613507321 37.0564573649223  
40.7311497914871 40.4220196471124 51.1169368198437 44.1148826235374  
43.1805016690297

SLC2A4RG 79.4528447794527 72.0112676564347 80.1665291227124  
63.7909104347097 131.973056760893 88.1886407127943 81.3082994649699  
64.120219344545 121.907038320974 70.4895190282848 80.7198077526005  
81.7566533443175

SLC2A5 361.524083649962 98.0023132593711 93.7782490229256  
445.307046237791 71.9737561190706 53.565717255469 77.9028721785469  
56.8094693588238 62.8635815439291 74.4696354388511 55.3147456054175  
44.5432192783161

SLC2A6 67.2437599548936 115.475642927427 97.9004351588426  
225.827961496781 211.335020823243 66.4015820814547 197.73829635261  
152.031470139119 142.066425511614 65.813547096222 89.5887648181505  
77.1954301283261

SLC2A7 42.9104454767916 36.5219488315447 41.437237454134  
40.0698728584484 41.0885562160946 33.895835691032 38.7337086062875  
36.8400213077707 36.6312676076142 39.8873706855774 37.5583886316038  
35.2448979801094

SLC2A8 469.14509810985 464.671881584567 225.960701908311  
130.10148014895 492.13077103258 542.901822331329 1097.92519921873  
337.363827785838 397.154258378193 829.152040996817 723.210613328966  
278.562093102424

SLC2A9 42.2455707947223 72.5918913856713 92.6672238953636  
55.9521647240225 45.1926710449855 45.4507786740825 43.1563544904505  
41.0381860307445 55.3415844848806 63.5489745357606 59.9326265577462  
78.6705291023488

SLC30A1 65.6556779936059 83.4465817617201 108.082240435027  
90.0942781313264 88.5564369981649 52.4992300612807 77.6574950328663  
73.5161632100822 106.276392548097 60.2877434874622 59.0537479001842  
59.7999569757275

SLC30A10 45.5758521267508 38.4330755397458 41.1367478979484  
36.9912468186322 40.6723334103791 38.4330755397458 43.3262148375525  
43.3262148375525 42.6366765186182 42.5664883002833 36.3390947880186  
43.3744503319109

SLC30A2 47.4076235350059 65.6010220593397 63.6334154351075  
41.3567204694281 73.4876346170053 46.1513019317765 193.897678586782  
461.123856163975 83.3710785008781 55.2893984191264 53.2083147523758  
44.1063440402552

SLC30A3 44.5282181324797 37.2810767789306 47.3861758958576  
54.8412943008635 47.8075998240396 46.4648868771662 47.2927436772465  
75.4935574755043 48.2123120250343 58.8022152133979 49.9338905397767  
49.0655215909632

SLC30A4 41.0970259989281 34.6814739995051 40.6312687664188  
43.367124590178 37.6119337673806 39.7394181011603 37.9430145836712  
43.9366081640576 39.853866204927 44.5303781239209 39.5792604499113  
44.1063440402552

SLC30A5 113.388372364837 131.842112197926 128.070047614488  
122.863635062993 115.482982633699 100.017263238916 96.593956699892  
101.804757613639 111.771533072688 80.7986033188909 87.5759422500374  
101.977864642569

SLC30A6 44.2718517563299 50.5785738734431 48.0654860391912  
49.5424425850549 53.3769775258214 42.9695585740813 51.7714254834195  
46.2779564481158 52.3579564953125 43.1839109702714 42.7275315121163  
48.3119523820103

SLC30A7 357.574415292533 333.027861213254 284.868613843826  
415.759723627205 189.890451486324 213.520663841371 261.826480747537

433.89783033465 335.002151198999 494.733185937057 404.051373731802  
425.776214512634  
SLC30A8 41.9407041937973 40.3384318592985 44.0451487108213  
38.4208429103799 41.8806343997257 40.650742261428 42.629412460409  
47.4740726032707 42.7150227340364 35.6208308220005 42.357910063876  
42.357910063876  
SLC30A9 225.420624458188 206.28819203182 221.049503614433  
224.871193467078 155.174579191838 296.39460008432 169.251790128723  
350.978524278048 228.185436206823 309.994784298282 277.5073518536  
296.080833914967  
SLC31A1 171.974852167092 231.942272401651 150.636903991608  
300.486048273148 152.608998839745 94.3953345963359 169.367702213351  
123.410319693175 159.618353114269 90.0767501615808 139.385367339095  
123.776666209502  
SLC31A2 183.336550845401 139.472956453414 114.611557317665  
818.290793784784 139.472956453414 209.099378471892 155.406719968961  
148.255880793905 73.967017874248 113.759627906335 100.883604376864  
132.93879018892  
SLC32A1 36.3649677956953 41.8073910693411 33.7737772393677  
42.5664883002833 34.7018263647985 37.8102105794655 45.6042625176633  
39.0620487644635 42.9020321355927 33.5412189543102 40.723990462047  
34.6720534245631  
SLC33A1 42.6036491382658 61.9753438182501 49.5424425850549  
55.6481366056639 52.8190882379316 63.1091746640396 38.5066108855005  
55.5578334877425 60.8635925649592 48.0211752672327 48.2050207071554  
59.987045425047  
SLC34A1 49.7188990489616 45.7317208802318 44.0451487108213  
37.4223289687135 38.745552403895 37.4782441311626 39.7576136507593  
33.8558232866797 36.0741672064298 33.2987269789328 38.1835938174625  
35.0222940937513  
SLC34A2 40.9558083259517 41.2262949117288 38.741573807882  
40.3691324547049 40.1151953732637 41.408887993053 44.7958122466628  
41.0381860307445 41.7233690251839 42.3413611855132 43.6294818685075  
42.934549734195  
SLC34A3 38.5007204246293 41.2598458726002 42.5406888281114  
45.5869891570251 42.4864576619427 38.6414316877471 41.706879587091  
40.1474543172332 33.4698406117406 46.1390887492649 44.553780984244  
39.6352613956998  
SLC35A1 237.864776225441 188.887559923238 313.84216895297  
223.397586938079 128.38299874379 287.981727851442 110.589130460258  
128.503671563486 237.974766880957 665.510487460287 536.290060852815  
502.435496018532  
SLC35A2 150.457246020334 154.509548705054 142.957149812186  
107.034189847828 161.7095047889 75.8280474316969 155.928417606775  
131.431274187099 172.789150115627 93.146085697072 88.9836122218372  
89.8035133597498  
SLC35A3 145.193498675059 209.31241212773 162.151812425949  
107.242476674629 110.869341159607 122.15017220566 143.761359357965  
174.784373363036 134.968128884298 113.388372364837 125.997088252817  
165.141030604713  
SLC35A4 272.746328542895 189.47090669378 135.106756607914  
207.30460556799 242.503720442197 182.293430713391 196.034087004464  
200.401133392259 252.649651285136 250.866560791828 271.070078611015  
164.580141651883

SLC35A5 164.487183006292 263.765914589758 165.613176704286  
248.599530435666 163.028918580618 214.342804055754 201.530434441408  
143.042664581646 182.411383422586 197.868575583033 248.258290059808  
242.135519563833

SLC35B1 555.542222746155 618.293140877956 608.73319976638  
607.431621448599 873.451893437179 353.751797948675 659.981410181288  
530.710127703061 834.14766574977 264.88963894526 331.306005726359  
373.46798029115

SLC35B2 539.188951045594 450.515644056585 353.531051185171  
266.581466060604 409.811889288372 184.340249262704 323.048740324895  
230.649032296928 420.761600667193 419.271533050938 359.465715235071  
294.567137562864

SLC35B3 240.139560726101 152.36389833079 125.880019627499  
195.482216656634 198.652987129375 152.630871384615 104.341160312305  
124.605379715077 188.647431971957 144.427680369554 118.720812623965  
182.685579297058

SLC35B4 63.5693267269002 47.6229101519945 55.9459886217809  
57.2856683017619 59.5844022026141 57.3797835448761 48.3411413510851  
47.4740726032707 50.8485682149772 66.6332042895961 58.0800636554122  
56.0477607422828

SLC35C1 92.9323002425821 78.4289643729837 75.4317740345967  
47.8164193292842 57.5685357492202 63.6894484284172 75.4053820110486  
84.9075858560758 89.8660321621128 80.2774079897733 100.535211780514  
101.699631771662

SLC35C2 92.563449632567 83.3905516293346 75.8201286658785  
71.4564394972198 72.9580216367379 67.895735332714 77.7615826856723  
98.2843999216669 95.0350792557735 101.523741547876 94.9831937714438  
78.9701459806641

SLC35D1 46.1673159982664 49.6203214143464 54.9944485073259  
40.9607305725196 49.32293280121 41.8613406887824 56.6537562775715  
45.3872406432794 52.9482338979681 48.2596564318071 43.4709415392696  
43.1805016690297

SLC35D2 88.0979122006842 138.314834472957 122.531570028682  
95.6215575902122 105.187381311145 68.839885767937 123.061728345479  
100.114114765033 116.694275999729 112.919063481867 120.577102943782  
119.833821068193

SLC35D3 42.2455707947223 40.2493681589104 37.8386378737561  
42.8235313007746 46.3150221024046 38.1169703906207 42.2577689927563  
36.6452480995946 41.3803269429468 36.8059561571675 39.153226699662  
41.0657892043496

SLC35E1 505.47283014577 402.571146447946 381.6928205836  
431.727858902449 405.852280880924 263.330471155421 352.019218177371  
814.991871217268 299.890705180422 622.964590694346 653.089523541803  
558.451033789799

SLC35E2 51.8781065691038 40.3384318592985 58.5212649095879  
47.6687908290818 40.8873907150245 44.4619248757502 49.8281348927244  
53.5271601314404 51.9545473262296 47.7180816682562 46.4205654140754  
41.2437378488025

SLC35E3 190.940906139713 135.007055711266 231.778951567627  
267.024267633341 137.720182545143 136.190823415283 207.768377497439  
156.636360703756 246.09270373893 216.566390646568 170.172720177618  
162.598623692126

SLC35E4 42.9104454767916 39.7835513496873 48.3847843498476  
49.5424425850549 47.2074332636566 52.3187919317561 54.9765783642973

48.6441988290952 52.3579564953125 43.401782064778 44.1148826235374  
43.5738557773903  
SLC35F1 44.5282181324797 44.9370339275041 42.3536549114165  
37.651298468202 46.0043807840705 53.4466111440611 37.4772922422734  
43.9366081640576 48.8067321016961 47.9056710878325 43.844855336215  
41.863927676552  
SLC35F2 167.229755109155 128.374733248762 119.846620703059  
77.707180044659 185.378190201718 68.2614370871382 119.965950077259  
148.158262886253 162.658589763207 69.5853093594169 66.4568741702152  
93.3216420803293  
SLC35F3 37.7384958256497 38.380619572367 40.3452320167286  
39.7411455670172 40.0599807618105 37.6411775481424 38.5066108855005  
39.9576138799997 38.0658216688259 41.162473449625 40.4967168818294  
38.4938120203865  
SLC35F4 50.9381343674699 41.159706131351 42.157627240486  
48.4916117779992 40.0599807618105 46.0364000143537 42.7431359850339  
45.642304356051 38.8271346375425 42.785429206422 44.6286581923295  
44.8372404608604  
SLC35F5 111.954989477689 90.2721521466478 132.223745961048  
86.7823828209946 98.8537074610939 82.9449579428926 67.6767845246581  
88.6368226476614 119.333788465158 87.6598268114592 82.6602736441839  
105.91905761474  
SLC36A1 60.562215295948 56.0477607422828 61.5824518349507  
91.3967044940546 51.940083408061 49.1013967533186 56.2181240696479  
72.2610650652674 57.0301170427216 72.6549171886783 72.6731815563159  
60.7495043977707  
SLC36A2 38.385865183581 39.0894172982439 41.6079958749402  
41.5464765641928 43.5544347011646 36.1190722948669 37.0564573649223  
43.4544762830742 34.3842972343227 43.1839109702714 41.8168470823451  
40.8681871019812  
SLC36A3 41.5689645295284 38.957687788868 42.2577689927563  
38.8495095797881 45.1137938810047 45.8325181856483 42.9803717121865  
37.5511560880902 37.7805366040928 38.2069499294002 45.1432412071268  
41.5536168238478  
SLC36A4 55.7246872330059 47.765848710116 45.1569741609597  
150.801729138762 53.0419743379342 82.5956705829173 86.9185256838836  
75.2101993995344 58.4200819624972 63.3872214856708 72.1955435994725  
74.7557519831859  
SLC37A1 77.3752541676627 172.506486240017 173.891042920642  
59.4674205670657 116.694275999729 56.8505380943422 145.936763882526  
109.481322353402 102.559678338485 56.4553747079294 64.830448408529  
71.5836731059913  
SLC37A2 40.8681871019812 75.885672222265 55.6865353018811  
36.264823544143 52.4370718282084 48.3686935595826 49.2546642180676  
40.5158867964016 60.0736861987141 39.9948390976317 50.2203578628217  
64.1607001437806  
SLC37A3 107.722626390174 91.7844162703214 98.93324263369  
64.5845827915699 157.433061993786 144.250839367023 78.6911549149983  
80.6200293361016 129.478225450604 89.5777156320178 84.8084949516218  
103.302837652919  
SLC37A4 354.38923772101 427.972184856393 365.620745180605  
155.928417606775 462.362735276132 138.314834472957 477.924466983414  
271.674332647296 357.44124276077 272.545033107746 232.47874874281  
237.237762964658

SLC38A1 72.7441949116991 297.475572902965 99.6101168315098  
149.536891697595 182.80711310964 97.4062608315831 197.515728627482  
210.50519205965 222.81957100654 94.4129246851651 188.811171804746  
145.883224917856

SLC38A10 110.837476359817 116.184007615285 80.5794942236641  
122.024487499513 139.778556493519 74.5674342324036 103.808640431626  
93.1238695478498 104.250582652805 85.9392883641626 89.1382266158262  
70.6903168772326

SLC38A11 41.8409927585705 52.3187919317561 74.3523005665671  
40.8681871019812 38.9496515344837 44.7804080899431 40.1235656101329  
43.9366081640576 44.2607789091176 40.8970401536578 43.4709415392696  
43.3744503319109

SLC38A2 236.727577348109 477.023373302787 375.036941898486  
471.172160927946 327.631923082696 196.735144093998 307.705431227338  
395.755223372329 597.996273468244 769.685677484067 491.100053064936  
530.710127703061

SLC38A3 36.4564050256915 36.6968906669565 36.1042012504758  
33.1817617228171 37.956732373465 39.9397419279057 37.1643693306382  
39.3709357615493 40.8970401536578 41.0057887014368 39.4410515050885  
35.6427313468066

SLC38A4 44.9896851005259 51.4413099192899 42.0621425894624  
45.5869891570251 42.7107928951766 45.9266745571724 78.0020909283414  
112.873697337138 48.4869909888679 56.9463858443402 50.2203578628217  
57.934622029119

SLC38A5 42.7150227340364 41.7337506166619 61.841867306916  
40.4359177791566 45.2556760873335 50.7516773099639 45.8980298854198  
38.8495095797881 49.8304479381623 43.844855336215 44.1148826235374  
42.1537476443423

SLC38A6 62.4317959077388 54.4793574349739 62.9967097752591  
135.92805172353 48.0234896130991 58.8605811695948 42.9803717121865  
66.0303950772736 52.8502823653368 62.3997407955361 59.501103909345  
66.6118713143653

SLC38A7 56.1912096308988 49.7363778831003 56.8595344107711  
63.6334154351075 51.940083408061 41.7627910693483 55.5578334877425  
60.6706478075023 55.4030910454028 51.1169368198437 50.7159667633757  
50.2163892855092

SLC38A8 41.1523487516364 33.4967065724734 37.9482157381008  
40.9607305725196 37.1565984182084 37.0180934800573 40.0052661202207  
39.1652965788406 40.4220196471124 40.2112371512838 40.9157352260901  
39.7411455670172

SLC38A9 94.5358147295719 74.621822948059 110.734219768388  
103.961956810572 102.77259665192 71.3932787152381 74.2690269784394  
48.4670130605028 85.7111041637416 97.8915084053153 81.3454589502043  
82.1365334012643

SLC39A1 922.047328788961 580.444451816014 629.301646370726  
560.802447943839 451.820169649522 406.417924060562 615.838713743621  
684.865133028228 491.468862309918 469.427640339806 444.169882251299  
593.801086643125

SLC39A10 53.4921736109774 63.4570909617664 69.0503036666628  
79.5838979704243 70.6903168772326 60.1042270393382 56.2181240696479  
81.2850357499192 57.2716485658185 81.7171463878604 63.664265793911  
72.7015808995427

SLC39A11 198.010793115588 271.478148993789 240.6614822416  
224.249210397247 233.232472394727 104.650071846586 166.33117014492

379.280296622892 407.564154455615 226.672191323896 184.377148097206  
161.630831921556  
SLC39A12 36.0144420013819 42.2577689927563 42.640829914102  
39.6292788039793 41.7929491793697 41.8613406887824 38.2933870238743  
41.1575777497576 41.9635525160083 41.9666541498638 40.547835538778  
37.7526485343328  
SLC39A13 44.1294459089314 43.8495248991589 43.0016969050339  
48.1662933382789 48.1473938886239 45.1873487463472 43.9450023643394  
43.844855336215 47.27543600687 47.7180816682562 49.532546810992  
44.4475838947656  
SLC39A14 220.03226547675 54.1773909134233 66.1541420734416  
182.52420078643 63.3638417360105 228.08291792003 53.4921736109774  
86.7710020879725 70.7238101239421 86.9626166234066 84.7058085717914  
174.609448758071  
SLC39A2 38.1169703906207 38.6414316877471 41.785676764591  
45.334106390212 42.9090346219023 45.8325181856483 58.5087296620514  
270.202959012185 40.5912213523345 45.0155543555707 44.2925355984056  
41.3481355128089  
SLC39A3 138.070735985503 157.040132256772 168.225699005719  
142.389246750828 474.155196153863 161.817972012879 162.735117558467  
121.945468001236 201.236491769447 125.027865666372 153.487141102615  
104.704892803169  
SLC39A4 184.303357812653 93.4180535865914 71.8706847571669  
51.5913529948887 107.211374033204 59.3246269573076 105.009081898873  
49.33855351691 97.7415824971555 48.6124127998952 72.230225336191  
53.7045101264881  
SLC39A5 41.1523487516364 44.1239711172417 37.0642268327439  
39.3750969348308 33.6330903323612 34.1806289878747 39.7576136507593  
32.8834169462007 40.8970401536578 35.4990901121893 36.131485826118  
33.1559412791294  
SLC39A6 84.7851173379268 195.430996540859 203.373397813051  
101.46584765758 114.629316822574 89.5998153671725 127.655537534156  
79.4916415027015 192.98559983091 73.671816307517 112.428734515811  
134.567947469561  
SLC39A7 57.6717135256391 48.0296332183129 45.7968648044613  
46.2462906014337 53.4109882045447 41.4508241771315 46.4388841354122  
51.1694248620208 50.2223403889892 42.7275315121163 49.2206713037152  
47.8931773060789  
SLC39A8 61.356483470053 53.5090984247271 58.2251348002272  
274.887090359131 53.9488501599452 54.400905818898 46.7100796279384  
49.1399035787209 57.5883027758003 42.3606390470387 47.0940613507321  
50.5165823866945  
SLC39A9 59.7179445506128 59.9682734755814 60.6567691532561  
47.9915414951747 58.9875400392427 51.294537308199 52.2476631126873  
50.9933795450314 51.2066664465185 38.745552403895 42.4580504587581  
50.8999542937724  
SLC3A1 44.7044140979108 41.7337506166619 43.1931731665131  
43.8002456102021 37.7576900881741 43.9724628401189 38.7337086062875  
39.9576138799997 39.1790517315259 36.5806287103157 44.0409178714232  
35.9604262434141  
SLC3A2 152.76005226611 190.592556065939 223.501516374076  
383.00934152588 215.290701336046 138.879948269545 293.755623192857  
155.392743674792 255.365088438518 134.447479156221 152.078104394345  
119.124583755587

SLC40A1 297.662970257144 193.290018569713 222.957344929381  
179.897685693038 132.090336898032 249.889110678139 104.00520458442  
130.925724760241 121.945468001236 231.417150220669 174.263925108623  
196.228284571015

SLC41A1 87.799979434508 89.7093249557939 110.849159638833  
52.8502823653368 127.345094323724 97.8915084053153 104.059057437473  
102.49785018292 94.5186910848217 74.6847594297153 77.0774476767901  
75.4935574755043

SLC41A2 58.8224410806741 41.0678614026819 40.301483914446  
100.168016285684 39.859345745831 48.0350549043063 46.4388841354122  
55.8087097725119 50.401623258584 48.3693338695392 53.0177144132449  
43.9541718254769

SLC41A3 145.492831993859 134.981483569602 114.321083441061  
94.9785931907153 255.324974349269 131.90520406914 204.774090707986  
164.047379890821 179.214713709599 227.317566600324 200.860376997315  
212.530138323284

SLC43A1 36.2496364442264 37.7384958256497 37.8386378737561  
39.066284740632 47.0954207417646 38.8336427948187 38.7337086062875  
46.7980335276155 61.5807110546718 39.6719190054379 44.553780984244  
44.0451487108213

SLC43A2 76.6868184563568 107.331284864757 110.540953771795  
327.912730756303 104.914715637173 99.8323169037315 159.176229924883  
121.729442469889 85.4420599474339 113.169111095305 99.9752275166514  
80.7227211275429

SLC43A3 69.8231400816467 51.1470623296569 50.9010149857308  
153.436974478757 50.8239419349168 63.1091746640396 48.3411413510851  
46.0126818431464 61.5807110546718 56.284748518655 54.6603683143597  
51.8251888604386

SLC44A1 551.1195044975 1182.86447291773 547.442608452594  
802.036670929858 430.868309653765 436.497820504526 739.541009338849  
427.540236966999 643.9329225331 818.290793784784 829.152040996817  
1317.29255644089

SLC44A2 471.046851874447 751.150916058018 1186.06822787922  
418.410951118141 522.49156295512 323.957165066178 494.231747291283  
818.927157206447 768.354209323884 954.116675685628 1263.76838179117  
486.622591654868

SLC44A3 105.802035886293 422.931891494195 308.393270347486  
55.6481366056639 175.136856246782 67.5812474586277 244.435346243998  
139.342661711134 247.966757890598 172.221482103025 133.067727272864  
474.155196153863

SLC44A4 2348.48320928245 887.118866402149 1219.52011418558  
1364.06060391538 727.181489302632 580.444451816014 1566.12726152736  
2663.19221471348 729.342532316666 1917.90025587049 2013.08489754172  
1533.38581753491

SLC44A5 39.3709357615493 52.8796369426118 44.0451487108213  
39.3750969348308 44.9936360641969 38.1169703906207 42.2577689927563  
44.5029690493211 43.3744503319109 42.0621425894624 47.4630625313159  
40.1700117452801

SLC45A1 40.2087556903277 44.0409178714232 39.3709357615493  
39.066284740632 44.2607789091176 41.3553369544097 43.4544762830742  
43.5544347011646 42.2577689927563 46.325232414659 42.7775752471711  
46.4952206446229

SLC45A2 38.2083710281545 41.554942319225 39.9566202184501  
39.2780515621926 35.945786149556 38.6704566269103 39.3585350448719



38.2233438809487 35.161618680127 39.6352613956998 40.2336961286593  
40.6614700944853  
SLC45A3 104.573463811298 399.80505620721 448.787414220553  
71.5249259772583 154.730266766226 116.900364583878 79.5707751325986  
93.879589378061 191.298525555624 76.4439037944547 70.3381994440425  
125.383837024985  
SLC45A4 115.691017747672 128.806903044733 128.89714160809  
198.821443323024 118.376686726902 68.1311562787361 66.2892779596928  
71.6931243081178 91.7761668960824 90.7551885299639 68.8058577447202  
78.4023698691285  
SLC46A1 46.0920218698606 50.2163892855092 45.6989664108554  
48.4916117779992 61.6452971581503 46.574682061365 54.4934782594218  
50.5070012045444 51.5888395924843 44.0409178714232 56.233217375698  
54.9919060580109  
SLC46A2 53.4921736109774 54.5374188496807 47.3861758958576  
42.9358255168086 50.6470461863549 56.4819802857598 44.7255207589606  
40.4359177791566 50.8485682149772 71.7464249053513 113.322929203297  
59.5875857071693  
SLC46A3 140.369714831352 85.7732262204681 112.007118067348  
162.30238363798 111.669813610213 149.769671874782 53.3111230705754  
85.4437963805637 68.9038222450855 114.972374827795 101.187156681366  
86.8194399159684  
SLC47A1 54.1745577382276 47.5647821785529 39.9101908547397  
96.0770202999531 45.5809132232681 50.2163892855092 48.0283573444179  
50.628152951493 42.7150227340364 42.6793753550854 51.6414075056938  
46.917149434588  
SLC47A2 36.8072833828297 41.3610369241157 37.0642268327439  
38.9534635879195 37.3508690072156 34.5886782974123 36.197424053556  
42.157627240486 42.357910063876 36.6893251782922 40.1742127891824  
35.7451401627836  
SLC4A1 37.3463875295726 41.0678614026819 38.6005272730664  
37.9875302985336 42.4864576619427 38.6414316877471 34.6720534245631  
36.0306975524309 35.9645119596869 32.2133093774284 35.7953070087288  
35.2448979801094  
SLC4A10 37.1485601150873 39.9697332660833 35.3649449469275  
44.6905691366696 38.8456942580061 38.3418933808844 41.253645578517  
38.8495095797881 39.4762546236449 41.6373771565199 34.6366195121669  
38.1421709520616  
SLC4A11 98.6108785181637 527.97309138633 329.978705095448  
76.9373289454707 440.421077161585 61.4944752562671 134.407474121421  
103.856444152519 106.799510275842 118.726647822102 117.993433347556  
138.210524893279  
SLC4A1AP 60.3381680822012 56.6927078228789 59.1040441894478  
60.620259884953 78.0077300979911 58.0910843932181 62.0404348860702  
67.0904616289706 55.7522234735038 48.4890615340603 55.1804535845496  
56.6888826857797  
SLC4A2 248.321641540666 180.255771684507 115.683762821211  
147.689479458785 151.344720108793 115.761674855716 147.758917745955  
107.792406701643 160.425627898607 143.563236821003 122.924027019519  
109.14984236229  
SLC4A3 47.5647821785529 40.5852276210998 39.1480645318984  
35.3829784221072 43.9450023643394 42.6575535390785 43.3832826368789  
67.7121534934164 37.9273653326866 38.7008388965825 41.4508241771315  
41.1868052124344

SLC4A4 41.8409927585705 47.9665737016961 41.554942319225  
43.8002456102021 47.3791873993182 44.5099734963815 49.6872467499977  
53.7743801734343 55.6991707857987 43.7303813515864 47.0940613507321  
42.4607795638552

SLC4A5 173.603999265239 85.7908542452355 104.313754953569  
177.584394977912 90.4622684763614 76.7063975550116 132.541333041312  
259.332340491331 83.5646728968172 199.404836798715 163.280931300437  
140.309952483162

SLC4A7 129.336439341458 125.90746674767 108.366007746533  
160.702832529922 188.236842521312 153.992331037033 178.092166249096  
111.669813610213 126.360723656793 147.033637977077 134.62138052303  
149.639066617945

SLC4A8 45.6001828766679 42.5269793679335 39.8656165405284  
47.0874209746031 40.831207953647 40.3946758935842 39.4012855594431  
48.1591264215184 41.7233690251839 42.1622837416589 38.745552403895  
41.1066323911308

SLC4A9 42.5193208629123 39.0102066700839 35.7105247506212  
38.8495095797881 37.5556299264699 34.7983399096627 37.0564573649223  
44.5029690493211 42.5406888281114 40.7063426028871 38.2795150354677  
34.5633623842083

SLC5A1 111.397578350396 39.3999056968598 35.2101597814352  
38.0958223740111 39.4693871570028 38.7340969861754 33.6696565339534  
44.7044140979108 39.0775870687758 40.1179210534118 36.0481934423077  
37.6557714476853

SLC5A10 38.0540928703622 40.9304534263482 40.8854777081971  
42.6913548400127 39.7295015093492 43.648722797963 36.5770509673571  
38.5137822620273 41.0539597647339 38.7085700011038 36.9833062027043  
38.745552403895

SLC5A11 44.2350046179299 38.4330755397458 41.1367478979484  
45.5869891570251 44.2607789091176 41.2567470068038 40.5585676679482  
41.0381860307445 43.7630587657205 39.7835513496873 41.0808257270221  
43.4709415392696

SLC5A12 38.5372368196365 49.9325655589226 39.7840818430159  
38.5598732884045 42.7107928951766 38.1169703906207 39.6222000738266  
38.8964578286293 48.4365720634326 37.7315666632629 38.9087995969091  
41.3012916486748

SLC5A2 41.7397731376692 39.1982470626863 41.6550823405646  
39.9697332660833 43.3896803974186 41.3094485574845 40.968974769473  
40.831207953647 40.4518431978241 42.4594149893798 40.6373400186325  
41.1554481567603

SLC5A3 39.9697332660833 39.0894172982439 48.3847843498476  
44.4367387274922 42.3685136297603 39.3841861812262 37.6036146841933  
44.797320243931 45.2897806651929 43.6033221838149 38.4689132737495  
51.0013344286851

SLC5A4 35.0202257459026 37.10170285405 37.7384958256497  
44.6905691366696 32.6463318577756 35.4142595025086 37.7136011474903  
41.3506832276112 38.6322728994674 38.4187686307607 40.8225507267584  
34.3409660445447

SLC5A5 37.2474303302343 38.6414316877471 41.2365089689635  
42.0102671859606 43.9450023643394 47.8636003588181 40.2154497375715  
41.9315419791594 41.2870505273664 37.5343260962758 42.357910063876  
42.357910063876

SLC5A6 551.490493022416 272.930242946726 217.78290286894  
172.237164781821 683.099079617304 155.123252685926 355.642611713396

576.140066807763 186.161177110898 143.894266185526 161.65846687852  
147.239329753205  
SLC5A7 38.385865183581 48.7084357480922 48.1331309338997  
36.264823544143 41.6806984441849 39.6251842352088 36.9355798143571  
40.3357777530419 42.357910063876 53.0357938671646 48.8744644207821  
46.2625470410195  
SLC5A8 120.289145237975 62.3983214098965 80.4060693489113  
125.676172266736 76.8964050504238 58.8605811695948 94.1289383735162  
216.358862796367 64.4098139218465 150.829277770546 131.045615546105  
120.73773749436  
SLC5A9 45.3872406432794 39.0894172982439 37.4642807402741  
43.4410741327254 39.2608760193011 37.4782441311626 46.1634822993009  
43.1567024035183 45.5779686360641 41.2276963324981 45.2265319826548  
41.5536168238478  
SLC6A1 43.6706764143908 48.4072568263884 44.696023817801  
45.4634652319753 41.1507980856436 40.040778349137 36.08956004634  
46.2286164776607 44.0256815382334 46.6598879466655 42.5864346233886  
41.8200132437731  
SLC6A10P 169.970634268117 253.764071470001 261.6201598868  
74.2429851177794 434.523449093691 138.362914843774 470.004780385708  
93.2402285327166 931.401929277001 243.06561740595 241.017227991238  
245.356135592468  
SLC6A11 47.6397712007919 42.6939394537076 41.0356368374708  
42.6913548400127 53.5594683028749 36.9060997041453 47.5963750520409  
56.4779645313958 47.7086093893038 39.9948390976317 42.170702295259  
45.2783024981315  
SLC6A12 55.3153799233744 51.119812302881 44.4311655729487  
85.1847490113446 50.6470461863549 43.5752393599169 47.4439407315335  
49.2901038327894 50.4974478884077 51.2318935933116 47.9942520395434  
40.9683275553869  
SLC6A13 69.5462764096011 60.3093790894864 72.4202724008052  
54.8412943008635 72.4060089486729 61.9432904657734 79.909124697198  
71.408876667815 77.2413564369342 68.8167148906225 75.5799609581534  
67.4197263416701  
SLC6A14 38.304249186058 35.8227939208521 40.931294690669  
39.2780515621926 36.7356360093603 42.0574848021044 43.4544762830742  
36.2539950294089 42.1594905198929 35.8304004211528 45.310660704531  
41.1554481567603  
SLC6A15 41.7780833969533 41.5170397156976 44.8872784170036  
46.5331216396695 49.32293280121 44.0423286480199 42.2577689927563  
43.6740007496465 42.9020321355927 42.8304701368556 41.0441816173391  
44.300405016053  
SLC6A16 39.4710743516517 38.6414316877471 36.5474283500601  
47.3574589211166 48.3814421939888 45.7300501624017 38.7337086062875  
54.1731035633439 41.2870505273664 48.6124127998952 42.911855821602  
42.0424641526302  
SLC6A17 40.0557788909923 43.683792219729 33.281531405287  
42.5664883002833 44.2607789091176 41.3553369544097 42.1607322031054  
40.2382908228517 39.7537274655115 36.6893251782922 40.1742127891824  
38.0452862258803  
SLC6A18 50.7390160399184 39.9697332660833 45.2313723727673  
37.5382094267692 46.9906120932727 49.5424425850549 38.8417151851134  
46.1673159982664 51.2066664465185 49.0841460667818 40.6373400186325  
35.0222940937513

SLC6A19 36.3649677956953 34.5023764006976 43.7630587657205  
36.5393857306744 38.1644569189523 37.9951997351435 31.9682164860619  
30.6485078361448 37.0126425326534 33.4316681623175 35.5179217192467  
37.3600014814388

SLC6A2 49.540449125788 46.9919960628953 43.9450023643394  
50.7046706880325 43.5544347011646 44.0804700754786 47.2927436772465  
40.831207953647 49.8304479381623 51.8412522234186 44.7114813656401  
44.7401523707775

SLC6A20 41.8409927585705 41.1131693269222 41.0705134231814  
42.629412460409 41.6285300488826 43.8227482938742 45.1735152121056  
43.7658269153047 40.646702696033 42.4594149893798 40.2330489360997  
41.863927676552

SLC6A3 39.1590964332473 49.9547657591437 40.931294690669  
42.4580504587581 39.2608760193011 37.2686490268265 43.9450023643394  
38.6454098044474 40.4997186069494 46.441301934328 34.3633615460307  
45.4799270968969

SLC6A4 38.0089018744739 69.8983723094667 43.7630587657205  
35.8472302065546 39.6535880152834 39.6251842352088 49.3854238365325  
41.3506832276112 46.0106098064475 45.7911932481722 44.8872784170036  
41.863927676552

SLC6A5 41.0608773166058 42.5269793679335 38.8775560911841  
42.4580504587581 42.1650127805175 41.0582900711341 47.2927436772465  
43.3262148375525 37.4540772310118 42.2614524730856 40.1742127891824  
41.5536168238478

SLC6A6 63.8626921347231 70.0470864733496 64.0162246399972  
93.9228336493696 68.307513091369 46.1513019317765 70.7238101239421  
69.9709625205629 57.2716485658185 47.3791873993182 44.8872784170036  
43.2776458914333

SLC6A7 43.5710871617107 40.716553247236 38.6005272730664  
37.8442841690502 38.745552403895 43.7630587657205 42.4939802311136  
38.745552403895 41.863927676552 35.0668743708816 38.956280281655  
46.917149434588

SLC6A8 129.525395445221 169.344094528032 188.120766710975  
81.2269477373795 326.963277148673 131.90520406914 351.290929267326  
87.8724689898823 939.453799186397 245.853111206859 218.613795121752  
183.165559564289

SLC6A9 51.5509268440571 47.765848710116 51.7138050344355  
43.9282059368202 45.1137938810047 58.3738081897999 49.0497778708674  
44.9673049606589 67.4304134449444 48.8950483142389 45.9104478407175  
41.0183489151839

SLC7A1 114.535461066963 178.675242612997 201.977265056102  
238.893145911331 906.833938613875 172.777241940677 357.839241226513  
200.318682162912 217.533011278692 251.210603834628 152.920586451578  
241.222680673439

SLC7A10 41.1523487516364 42.0709558258414 40.4882741869718  
30.2675713925613 42.9090346219023 43.6670755115848 46.3057385979341  
43.5544347011646 42.0621425894624 43.6033221838149 38.1835938174625  
41.4508241771315

SLC7A11 41.5421429082231 44.2630383225933 51.7138050344355  
91.9185612536409 39.1650142708257 39.3841861812262 43.8206425661746  
39.7509165247419 47.7086093893038 38.0078357808393 33.1645364749371  
37.3600014814388

SLC7A13 38.0089018744739 39.6995529770239 37.3687900733549  
41.0726336841311 39.7568367479301 33.3470732872681 42.4939802311136

39.0620487644635 36.5393857306744 38.745552403895 42.0750889188255  
39.0536056496869  
SLC7A14 35.6111578834671 45.7317208802318 47.5673419710251  
41.4273122914951 39.6535880152834 38.8336427948187 44.2166118829877  
43.7396619462033 37.1820543575123 41.9666541498638 38.8507804383261  
36.5474283500601  
SLC7A2 39.8299340037009 42.6939394537076 41.9273770960761  
55.7418331108915 63.4249771379563 76.3790849853724 69.2163524570019  
84.5467315697834 40.4491880920815 99.8323169037315 80.1077267656485  
66.5285423077808  
SLC7A3 38.8561375693335 41.4508241771315 38.8417151851134  
42.1273928203021 40.5710637884029 45.3328270847467 41.6466169548846  
43.1567024035183 43.8106375505041 39.6251842352088 43.0710577955487  
39.9941474864076  
SLC7A4 36.4564050256915 74.5654028199926 130.925724760241  
42.8235313007746 68.0414563597154 47.2009420656854 71.3527183280827  
45.9604707098953 100.476750028832 101.58345410371 95.6731932757489  
92.2530518251152  
SLC7A5 473.223156200183 666.816487335088 1122.44489338159  
784.951880532127 1118.62223628039 346.621778258188 832.181997440212  
328.721532812392 755.106456358949 274.134201700259 121.084398596738  
149.899176549323  
SLC7A5P1 42.1537476443423 42.4493032770053 42.281606728072  
57.6511495792664 42.6575535390785 37.7000400506818 40.6216891610774  
44.8727287473605 41.7233690251839 40.6559419616644 44.6834648302383  
38.1421709520616  
SLC7A6 70.6784633355742 65.1291617069903 73.8227449336903  
91.7068354379889 100.52186805932 63.9650465690339 68.7753456118815  
63.2125855149045 54.4059109100338 57.3562426592112 59.7044210110693  
74.2180011215707  
SLC7A6OS 49.8472708021525 63.0670482657086 57.8111054584154  
44.4367387274922 62.588825192561 55.4694986901287 62.5506324864207  
58.676230030835 53.3094843669564 43.844855336215 47.6884372645373  
58.3586374083245  
SLC7A7 250.832808506455 131.99898435227 122.331946672266  
1237.93130196998 92.3034609409756 170.223657280542 105.802035886293  
128.291287011686 56.1733549054832 84.7642634532073 79.9567256807679  
100.120990656033  
SLC7A8 56.3106156221316 74.4379676234684 86.0230765383602  
62.1776700757427 72.2665537421443 50.5148383400703 48.1747307200218  
70.7238101239421 130.716532316693 123.190887747662 136.140128421585  
90.5503099572843  
SLC7A9 59.2903915056319 53.565717255469 44.3344900481112  
38.2041059863839 55.1563703466328 65.564930068976 47.8947595316832  
65.4714272652857 69.1129431075514 76.2533853403813 67.3976855661302  
66.6118713143653  
SLC8A1 39.3709357615493 43.0227387991135 40.7620472083159  
48.9944486068347 45.2556760873335 46.7800033479223 36.634024014558  
42.357910063876 40.8970401536578 37.8217989841918 37.0180934800573  
43.6753843488695  
SLC8A2 65.3531590366085 43.2649781354792 43.401782064778  
47.9915414951747 44.5668141895992 81.2314452281031 35.0305278582179  
48.4670130605028 39.6609238036815 68.6788460999238 66.2027948645675  
54.9919060580109

SLC8A3 41.3387790895716 39.2907645923217 40.6216891610774  
43.4933087941017 40.7779767565889 51.5715929289773 43.2776458914333  
42.0930656891788 42.8414096678708 44.7463386786906 50.0303076717704  
39.8947803869521

SLC9A1 483.20917825594 912.757335169259 1483.40077183826  
328.236037051756 426.015657750123 248.194954741095 754.700295017212  
783.039774594242 893.185203928127 2272.91548405176 1664.00821059181  
812.814329906663

SLC9A10 39.6609238036815 44.1239711172417 45.5883690965192  
40.7481155008596 43.844855336215 45.0882356578404 40.7910160811527  
45.642304356051 38.1169703906207 47.1001757441025 42.7275315121163  
41.2437378488025

SLC9A11 41.0608773166058 40.0984333134909 41.6550823405646  
39.3750969348308 40.9950639693255 40.244271403831 41.9918605927928  
40.188873541274 39.7162631015511 42.4393920571519 39.6833800000587  
43.0930293831497

SLC9A2 45.9090659324223 61.6219790276408 38.9790184198145  
35.314469458379 55.6069214673486 37.8102105794655 48.3411413510851  
171.386815652277 68.4229528414965 68.8167148906225 54.7883681830995  
49.5539622682049

SLC9A3 30.9241129241985 37.2810767789306 38.4043916290561  
38.5252456306656 43.2484996523549 39.9397419279057 44.0687697278114  
36.8400213077707 40.0403898620771 38.6454098044474 34.266241549578  
35.5523662009011

SLC9A3R1 571.790034754076 311.195207833203 222.05036990665  
313.921236120658 292.99497881914 119.333788465158 322.678762360476  
295.127975044241 403.664724682094 136.20629436945 109.386655134289  
103.75895351937

SLC9A3R2 46.441301934328 40.7952353240579 54.9944485073259  
62.8201270538435 52.5645416722441 39.3841861812262 41.4742337714895  
49.2901038327894 42.357910063876 52.7972156492746 47.299647867533  
43.0930293831497

SLC9A4 44.1294459089314 46.6598879466655 49.2595762436995  
50.0526763693329 53.9612654850046 41.7627910693483 45.8980298854198  
113.367264677544 47.1744296124496 43.6670755115848 46.2560238004757  
43.6488638425729

SLC9A5 51.8781065691038 39.2907645923217 36.6522278218553  
36.890925044696 41.467005949568 40.8634043028528 38.7337086062875  
39.2672712041774 36.3649677956953 38.4187686307607 41.3553369544097  
44.3521099857368

SLC9A6 54.0990839134272 59.2945953587048 65.2001674269291  
72.8294672035715 68.2215392821251 57.4777075615651 61.2183034191703  
63.7698113513374 75.0946376748497 76.2533853403813 66.4462382864605  
70.3708315627248

SLC9A7 48.5835484742456 49.9547657591437 47.2962360458401  
46.4555908533915 43.4544762830742 43.2805590023412 52.4111687156893  
44.9977782988116 50.8485682149772 39.1621898366355 45.8180710486329  
39.0536056496869

SLC9A8 68.5457752893587 95.4942268742467 73.0128142320238  
114.734157967466 46.9906120932727 83.0554837248934 93.3897477314201  
70.5322939116406 68.1674425673171 90.4957279507369 93.0410625954471  
93.3644318958633

SLC9A9 56.8168526942685 60.3928833351886 61.6878176260761  
94.9785931907153 59.3611824459962 210.437554813031 51.7714254834195

65.813547096222 66.3209349903185 166.45998863285 125.221639689345  
104.860298453006  
SLCO1A2 39.6333888530279 40.3034574135048 37.2838080935695  
39.1706564265495 38.5196580573846 39.3841861812262 43.0363146912163  
36.2040651761268 40.3742983433463 39.9612063794301 35.9956353141463  
41.7122023703755  
SLCO1B1 41.8409927585705 35.9305494063137 42.2577689927563  
39.1335009052403 38.6213341190836 39.7697110924474 40.1235656101329  
39.1652965788406 42.4784375889044 38.4829727716328 38.9240290061433  
38.9496515344837  
SLCO1B3 39.8662795144616 39.1982470626863 36.178547300352  
47.9915414951747 35.5220586859301 36.8059561571675 40.6750540874299  
43.2551508830106 78.7182388025668 37.2089297656361 36.6298807161755  
40.4639532172338  
SLCO1C1 43.3098985178373 40.6723334103791 40.5734458834617  
39.9697332660833 42.039525923161 38.861780967827 41.7614975630362  
44.1311654985682 36.8127605061228 35.6846110289528 38.3684202018524  
38.6454098044474  
SLCO2A1 129.938114164087 317.186419919708 320.330057050615  
652.480459437977 148.144200968432 134.239606718101 86.4114854104675  
236.340873296213 63.1091746640396 84.1639779987105 318.527516338791  
235.018922676506  
SLCO2B1 232.238647125646 235.514830602053 260.15500351311  
668.584452504579 144.139555313429 384.919835924792 117.907440794926  
119.808125185521 58.5946363700203 92.4534854832186 130.890690835631  
122.720768249799  
SLCO3A1 55.4635297192076 49.32293280121 52.8502823653368  
85.5135159896819 55.1023658447049 57.4259236299197 45.5581356216957  
50.0748292497578 55.9138087029307 70.5619719048506 75.1701698483856  
68.2975137482252  
SLCO4A1 159.603518169388 62.6984594468418 71.4473248804357  
167.724518368713 149.375918224338 101.693848821246 75.5830548489892  
85.1544284060549 67.1278109419819 63.3006977162657 77.5698542248061  
77.3999378505514  
SLCO4C1 43.4626049853157 44.9370339275041 43.9450023643394  
45.1944222548351 38.745552403895 36.2015763253919 48.1747307200218  
69.4677195088043 40.8970401536578 44.0409178714232 38.6662194645633  
46.4499258373233  
SLCO5A1 38.1169703906207 45.3486182278177 36.6522278218553  
49.3654837541353 38.6454098044474 41.8613406887824 52.7002314230604  
44.8997235283254 39.3750969348308 44.3648993568405 38.079222289614  
44.3521099857368  
SLCO6A1 44.2350046179299 44.7829632472754 38.7745734037492  
42.8235313007746 40.8873907150245 40.7616966228404 38.941855825269  
45.2806199505029 41.2870505273664 37.4302011516587 34.9428206949566  
37.3600014814388  
SLED1 44.0328992213727 44.5152708955623 46.5650556481721 55.0604256312495  
44.5668141895992 40.9506062495231 60.7992483126292 45.1714698794331  
47.6195009345747 42.2614524730856 46.972521499515 41.3481355128089  
SLFN11 147.841274204532 93.6124140212565 72.3508448479791  
306.487935692954 74.1282220615085 177.425508756002 187.982920458868  
76.2258667419953 91.1271533616476 68.9562915755919 73.5527788467294  
95.3145142003966

SLFN12 52.4179224871914 53.2841144999258 52.0742951366864  
54.1240583139871 57.1935729219207 55.401776072578 54.0170817319522  
41.1575777497576 51.3511088648386 40.6022003765153 42.8263096141654  
50.379587451669  
SLFN12L 40.9558083259517 42.5269793679335 37.0642268327439  
39.853175885492 43.4544762830742 43.3785777889265 40.3302268293707  
38.1835938174625 38.4344387289956 43.844855336215 36.2435874904689  
44.3521099857368  
SLFN13 46.0920218698606 78.806097512943 51.7138050344355  
63.4531374125233 42.3685136297603 42.9695585740813 103.619396986593  
82.5170409503063 77.0703146713865 48.6124127998952 47.8988096575648  
43.8575940017119  
SLFN5 53.593974682612 74.3729155936862 65.6620676514157 68.8167148906225  
47.4548471240051 62.5542376788358 62.5506324864207 44.4031868028216  
56.7991853808475 48.1392888470269 46.2560238004757 50.379587451669  
SLFNL1 44.436995101921 35.9305494063137 42.4580504587581  
30.9241129241985 37.3508690072156 39.2248354955045 37.1643693306382  
29.0303154053123 39.2809305246091 43.1839109702714 35.5179217192467  
43.8575940017119  
SLIC1 39.0620487644635 41.159706131351 42.5406888281114 48.309866878365  
43.2484996523549 37.7000400506818 38.2933870238743 46.2779564481158  
41.863927676552 44.3648993568405 41.7272875295469 40.0557788909923  
SLIT1 43.844855336215 37.1685072112618 38.2280071951674 41.3027031037343  
40.2449343247539 40.8634043028528 43.4544762830742 41.8417024632349  
36.197424053556 36.1550293353654 39.9899430628542 40.2669497398702  
SLIT2 68.9745034946434 51.9421032049606 54.9944485073259 111.703187941409  
59.3611824459962 365.792144095604 65.2361525412756 57.7805922926828  
47.3791873993182 188.582370265555 171.689014874037 88.4819048592858  
SLIT3 112.787082951803 71.5249259772583 150.43149196048 91.5202521578181  
137.309523231049 461.123856163975 41.8315602975157 68.2309359831273  
60.3351200884626 405.148979342648 304.033573873184 204.089652936303  
SLITRK1 37.4554876386402 36.5474283500601 41.437237454134  
42.0621425894624 38.0598374201407 37.3799542961839 42.1607322031054  
36.2015763253919 40.4220196471124 39.6719190054379 35.7953070087288  
41.1066323911308  
SLITRK2 35.7012997405508 38.5252456306656 34.4716904283753  
36.264823544143 34.2638875325204 36.6996187567892 35.8227939208521  
31.3302670771182 38.6322728994674 32.1260264272477 34.064698871541  
42.1537476443423  
SLITRK3 43.0001432913058 39.8695929627783 37.8386378737561  
37.9875302985336 41.2740822675592 57.678188678075 41.0381860307445  
41.2551966132486 40.7847110517594 42.5664883002833 45.390192977585  
41.1554481567603  
SLITRK4 43.2724556187214 49.7363778831003 45.310660704531  
70.7202372217584 48.7288537840562 64.9498081060676 52.2476631126873  
52.1788489555942 76.8864157610323 53.4109882045447 52.5930185400362  
68.1513215633609  
SLITRK5 39.266565827316 40.5400384479766 43.6670755115848  
41.3027031037343 39.859345745831 39.3841861812262 42.9803717121865  
39.2672712041774 35.9645119596869 41.3321861371202 41.6336636285875  
36.8690774823319  
SLITRK6 42.442231667357 70.7702047405718 65.8455652907556  
43.8002456102021 42.4864576619427 42.6575535390785 51.7714254834195



|        |                  |                  |                  |                  |
|--------|------------------|------------------|------------------|------------------|
|        | 40.931294690669  | 101.577767481269 | 76.4439037944547 | 70.2215218476683 |
|        | 72.3297091475814 |                  |                  |                  |
| SLK    | 119.167027972122 | 288.190015621249 | 229.881790983135 | 132.604567913122 |
|        | 124.134493738558 | 180.679129876248 | 165.160683489444 | 240.217589414972 |
|        | 181.200738629391 | 170.720099897973 | 189.111092737256 | 184.536327776767 |
| SLMAP  | 286.398178392901 | 280.622184239624 | 334.813163079302 | 255.559793355361 |
|        | 227.059460958349 | 2365.73772015255 | 274.887090359131 | 282.035361446993 |
|        | 329.557502151159 | 1413.36279821142 | 1545.76489731307 | 1829.30985071028 |
| SLMO1  | 50.6908854131408 | 42.7261365779149 | 45.310660704531  | 56.2508140932179 |
|        | 77.4094261081238 | 58.7992572743257 | 91.4514026506253 | 62.7743500747415 |
|        | 55.1050911553097 | 48.2596564318071 | 54.3503706415317 | 52.7972156492746 |
| SLN    | 37.9387791625384 | 46.8236022402545 | 65.2670315837785 | 43.4410741327254 |
|        | 44.5668141895992 | 51.6053353177789 | 51.7714254834195 | 38.956280281655  |
|        | 44.4395580493118 | 40.3235655331796 | 43.4709415392696 | 50.4847465816184 |
| SLPI   | 410.716248834784 | 59.0709442090059 | 144.281881262975 | 178.379117285008 |
|        | 56.4685270445642 | 194.536619596804 | 67.3976855661302 | 556.572994352617 |
|        | 239.924746743429 | 260.093838596699 | 162.902264837659 | 281.840536529928 |
| SLTM   | 191.291480830946 | 208.22938545273  | 172.720244584464 | 139.385367339095 |
|        | 231.304658157247 | 201.330854646158 | 190.187931547806 | 154.633672616367 |
|        | 232.019748665806 | 319.408264906288 | 246.20973320244  | 262.735075993242 |
| SLU7   | 194.395766807005 | 138.50445813694  | 215.645475520124 | 283.88971280023  |
|        | 130.417782238512 | 288.386446189379 | 189.516455814322 | 160.479699603187 |
|        | 157.334378544568 | 148.467977704907 | 152.843785599892 | 189.950108471943 |
| SLURP1 | 39.9697332660833 | 42.6939394537076 | 52.8041782638549 |                  |
|        | 37.8442841690502 | 46.3150221024046 | 34.7983399096627 | 42.4939802311136 |
|        | 35.9023742468744 | 42.2577689927563 | 41.7405682794166 | 44.9713479185144 |
|        | 38.1421709520616 |                  |                  |                  |
| SMA3   | 42.1537476443423 | 40.8880530359822 | 41.8751578329365 | 41.4273122914951 |
|        | 37.1565984182084 | 31.1150868775826 | 37.0564573649223 | 39.9576138799997 |
|        | 34.1294694030979 | 39.6719190054379 | 36.7283081422707 | 41.4508241771315 |
| SMA4   | 75.4317740345967 | 105.997702773537 | 108.512469038407 | 99.2432911346944 |
|        | 75.9909523932333 | 93.5717680539357 | 73.5993692960562 | 84.9280683258012 |
|        | 83.0262409967927 | 78.1351673826829 | 114.719721626067 | 81.4881766238989 |
| SMA5   | 44.5282181324797 | 56.2305155589239 | 55.7764940944098 | 45.334106390212  |
|        | 53.0419743379342 | 47.2009420656854 | 57.9583667603818 | 50.7364620410977 |
|        | 66.0350709576651 | 59.4969799685856 | 52.1788489555942 | 56.8534370691413 |
| SMAD1  | 41.9407041937973 | 43.5627649099623 | 42.1901757067073 | 37.0732977341185 |
|        | 41.8441156763056 | 43.4681646416585 | 41.6466169548846 | 39.7509165247419 |
|        | 42.0126083977597 | 42.6366765186182 | 44.7114813656401 | 43.2776458914333 |
| SMAD2  | 51.688837858865  | 47.3888871633584 | 42.0260170217597 | 48.260931742163  |
|        | 43.396731689369  | 46.8285206335139 | 48.9826868640753 | 45.7030835309976 |
|        | 49.5265949137207 | 46.0673827977665 | 48.4717951775049 | 47.7596919358651 |
| SMAD3  | 192.058030454066 | 247.356027979377 | 194.666769955149 | 114.611557317665 |
|        | 198.010793115588 | 186.002828997122 | 146.117756310709 | 308.568617575909 |
|        | 278.562093102424 | 754.338272293094 | 583.421166842011 | 723.210613328966 |
| SMAD4  | 232.019748665806 | 282.603767561794 | 267.70610731202  | 262.534449975056 |
|        | 177.236964110663 | 453.260719561292 | 244.529657015078 | 224.749607192071 |
|        | 402.316689485215 | 334.093449847539 | 309.39599482851  | 391.292537565032 |
| SMAD5  | 149.260740603715 | 152.47776741936  | 119.795228959021 | 103.577201248705 |
|        | 127.797511870397 | 197.73829635261  | 100.423344358771 | 111.910324041953 |
|        | 137.034037711549 | 298.252355588344 | 204.089652936303 | 201.427008153788 |
| SMAD6  | 85.0753342967819 | 524.451156145427 | 418.552186865503 | 122.863635062993 |
|        | 318.069132873489 | 113.979504140326 | 142.03031230486  | 59.6720198281342 |
|        | 240.139560726101 | 251.803102904399 | 265.570814613305 | 173.100153934025 |

SMAD7 78.812106589086 110.009834478125 108.156702405177 94.9785931907153  
64.7488184936482 66.3404989659221 64.0291286735557 59.1533197797534  
71.4356132400211 94.8176664515469 89.9580440276828 66.2305843819029  
SMAD9 41.7397731376692 42.2577689927563 42.9104454767916 47.9915414951747  
36.6354013629791 38.2293008890613 40.0052661202207 42.4580504587581  
44.8997235283254 43.1839109702714 45.8180710486329 47.5025821041537  
SMAP1 83.5069968129733 125.90746674767 105.814959179397 117.699959435983  
88.8330881965986 117.76002524375 101.940584589951 67.2714646016644  
90.6347108049639 107.792406701643 97.5534379346899 121.423421895502  
SMAP2 213.204385896543 287.363928615517 427.818758455214 1354.50256889331  
291.42149037871 416.972264086884 314.091389958069 271.206999109791  
428.958127252533 374.850749726567 407.249003342541 298.282957415786  
SMARCA1 99.1565755621214 111.689615107055 171.205726660714  
73.7124988616836 147.704325041249 168.492959515167 145.120664806316  
106.8866235778 87.8724689898823 120.73773749436 118.720812623965  
166.752205770965  
SMARCA2 118.980144905852 237.864776225441 114.979124960177  
201.486224052899 106.190104122745 270.600852806342 199.522267292552  
252.243064327969 154.633672616367 325.990132666873 275.549982777518  
286.340091833711  
SMARCA4 488.649780652311 703.315796616275 643.9329225331  
342.829992044257 1557.42399344934 352.600793906035 717.375649834144  
659.396637478356 838.974043046676 416.972264086884 501.585246203512  
365.459728613746  
SMARCA5 61.6183748238619 72.8472187581193 73.8105012820769  
84.6435656850129 84.6158251687884 76.2665254494195 69.6301237585571  
72.5835488194631 84.1895471533806 61.3800530107369 62.1271781951319  
79.6770200338268  
SMARCAD1 95.8734933265537 128.256151920468 103.64431747876  
82.0292880742189 117.689172019617 65.813547096222 100.139490974785  
73.746472097049 110.909109947659 126.470889051684 117.074650076861  
106.5477041881  
SMARCAL1 174.685146336531 120.60052672409 149.055511050346  
147.52790076468 206.791464145857 140.744765497063 153.310447977094  
194.207518642389 157.020685801527 160.973602503707 142.048367760597  
123.455270940015  
SMARCB1 193.262615637464 218.099774231575 180.902423012987  
140.030757545662 169.322551237636 137.424708183613 418.693470287372  
164.722166245312 264.212242593461 168.247603128156 168.561260174501  
140.175068871414  
SMARCC1 165.220069268347 568.905368101326 384.080719411412  
249.942109342324 680.279119780451 354.086949676663 609.797179957996  
478.682734715193 665.122091380755 482.5816387921 433.637087338002  
477.558242266308  
SMARCC2 104.409397223301 188.408367998553 176.07173250529  
103.64431747876 145.883224917856 173.977605406146 213.830284761604  
208.743876555152 164.882513036349 131.083141370546 151.111664091983  
135.344261822716  
SMARCD1 242.546821017091 267.523307072523 316.185342210304  
163.995560004001 256.116479208201 187.888403806895 293.410413883219  
296.271895016431 473.223156200183 293.883582116334 266.687281047486  
211.926421068313  
SMARCD2 179.994715581707 236.759651096748 406.104588997462  
126.336900591139 253.333114749013 210.032782918825 350.796638646601

|         |                  |                  |                  |                  |
|---------|------------------|------------------|------------------|------------------|
|         | 300.057362423939 | 521.546082699431 | 197.040881690021 | 252.061166074743 |
|         | 142.417106615034 |                  |                  |                  |
| SMARCD3 | 101.002303802745 | 50.4872122867759 | 51.7663108516261 |                  |
|         | 90.9712092640278 | 72.0443425395404 | 100.344513700137 | 51.5967098638347 |
|         | 78.1448136847078 | 63.1490153551677 | 81.0214543140606 | 83.9873645051122 |
|         | 74.3442318693865 |                  |                  |                  |
| SMARCE1 | 148.227172305163 | 227.895442198856 | 151.205675888138 |                  |
|         | 151.831767769522 | 179.064697219173 | 257.194689822426 | 221.163225922749 |
|         | 163.602952119927 | 274.02972772427  | 222.05036990665  | 206.28819203182  |
|         | 169.344094528032 |                  |                  |                  |
| SMC1A   | 51.8781065691038 | 48.7847528954724 | 53.8724557170772 | 49.7350276169552 |
|         | 44.147557390293  | 48.0350549043063 | 59.8273072817267 | 47.0940613507321 |
|         | 64.643220133046  | 66.6332042895961 | 64.6446465846487 | 56.9379721393904 |
| SMC1B   | 47.4678477186801 | 45.3486182278177 | 39.991353369336  | 43.1847628331565 |
|         | 46.7508829977587 | 39.132725377815  | 47.1345949868029 | 43.844855336215  |
|         | 44.619512785899  | 43.7303813515864 | 42.0750889188255 | 44.2527566343661 |
| SMC2    | 74.3981029634178 | 72.9700748169457 | 53.6837370963602 | 58.2571968311834 |
|         | 75.1328739717464 | 63.7818442618767 | 82.6381941930783 | 67.3308332069908 |
|         | 71.2572485987604 | 62.58750768974   | 55.4694986901287 | 58.4200819624972 |
| SMC3    | 126.404988409795 | 146.658116519622 | 127.093495914275 | 131.955454394903 |
|         | 122.988056802699 | 149.916892729626 | 160.733526836282 | 95.1818735488388 |
|         | 128.521748930472 | 109.251112569215 | 117.732966326465 | 144.928534157065 |
| SMC4    | 83.374777060444  | 108.847044476692 | 104.642326714249 | 82.6335490909697 |
|         | 172.801059111314 | 67.2649356062263 | 114.947362505193 | 113.994256868581 |
|         | 104.860298453006 | 58.8700900181234 | 58.4016768664589 | 65.2125527940945 |
| SMC5    | 39.6609238036815 | 34.7135536792489 | 38.5045333213784 | 40.9607305725196 |
|         | 37.8679241954337 | 36.6996187567892 | 44.0687697278114 | 36.7460922671619 |
|         | 37.0126425326534 | 37.920964499903  | 39.9899430628542 | 38.3291713594599 |
| SMC6    | 71.6849360818041 | 52.1967540852276 | 52.5353664902258 | 50.7046706880325 |
|         | 58.8961770381033 | 43.4681646416585 | 59.9792284253187 | 83.3826639718546 |
|         | 59.5929655877036 | 53.1993028936883 | 49.1067959632109 | 49.4786466722535 |
| SMCHD1  | 51.7607563002005 | 58.1027665533767 | 51.5292723244077 |                  |
|         | 70.7202372217584 | 59.6922302604696 | 60.877229406755  | 65.524821699432  |
|         | 46.3685439301234 | 46.581796165231  | 44.571915452417  | 50.7903824729818 |
|         | 48.1627097465883 |                  |                  |                  |
| SMCP    | 36.0144420013819 | 32.396635964353  | 36.769073068743  | 36.1562979552173 |
|         | 38.1644569189523 | 39.4953494583071 | 34.0777108441756 | 35.2642250366721 |
|         | 34.1294694030979 | 42.3606390470387 | 37.2018803984555 | 49.1200355938198 |
| SMCR7   | 42.8036731479932 | 43.9421822132391 | 39.1799070031819 | 44.3638402537972 |
|         | 39.3999056968598 | 36.7356360093603 | 42.22763273471   | 41.4812544772644 |
|         | 44.1519466943185 | 37.9661004970253 | 40.9157352260901 | 41.3948836161924 |
| SMCR7L  | 193.981651711507 | 148.544012961815 | 173.800190134221 |                  |
|         | 155.287591646469 | 174.905877478501 | 143.679866958604 | 131.097521229971 |
|         | 118.186590679218 | 152.441506175141 | 211.253227661874 | 180.994353525666 |
|         | 163.299997237276 |                  |                  |                  |
| SMCR8   | 36.7356360093603 | 41.159706131351  | 34.6977013306396 | 39.5050383901884 |
|         | 34.7018263647985 | 36.1190722948669 | 35.6056062164318 | 36.6452480995946 |
|         | 35.3227485563945 | 37.4302011516587 | 36.8282383070068 | 35.0222940937513 |
| SMEK1   | 38.957687788868  | 41.4508241771315 | 34.4716904283753 | 33.9645433044281 |
|         | 39.4693871570028 | 40.650742261428  | 28.3262844159644 | 38.956280281655  |
|         | 38.8271346375425 | 42.1622837416589 | 33.4071187618571 | 42.7782216342806 |
| SMEK2   | 217.39432336811  | 153.139323479953 | 142.614006543733 | 184.50283792606  |
|         | 112.23915619297  | 208.97126697486  | 106.878946016737 | 185.963572053301 |
|         | 220.010492114456 | 118.32905874786  | 139.071851755156 | 225.690879436355 |

|         |                  |                  |                  |                  |
|---------|------------------|------------------|------------------|------------------|
| SMEK3P  | 35.5179217192467 | 35.7393138893354 | 36.6522278218553 |                  |
|         | 42.357910063876  | 37.5556299264699 | 37.5887129572848 | 35.4623691645629 |
|         | 37.9837233601316 | 36.6312676076142 | 33.9967481174035 | 40.1742127891824 |
|         | 38.6454098044474 |                  |                  |                  |
| SMG1    | 97.8825824657468 | 133.673536028938 | 165.613176704286 | 134.099684731177 |
|         | 106.691530592115 | 103.856444152519 | 92.9747592911324 | 118.115557136662 |
|         | 133.947490654701 | 136.408012600787 | 150.583488352207 | 143.84904170479  |
| SMG5    | 189.111092737256 | 193.830224000034 | 172.789150115627 | 112.368910939752 |
|         | 224.749607192071 | 113.979504140326 | 221.325534445978 | 149.173801572239 |
|         | 139.590367312743 | 109.326279686847 | 81.9218437790485 | 112.316483867372 |
| SMG6    | 41.4508241771315 | 44.2105195734073 | 43.4709415392696 | 50.8567345921473 |
|         | 39.2608760193011 | 54.9108046955355 | 49.2546642180676 | 46.695848687694  |
|         | 60.8635925649592 | 61.7502624458447 | 53.4088637045445 | 52.0359304386476 |
| SMG7    | 209.363955566338 | 136.644759501653 | 160.080366694799 | 167.449422388453 |
|         | 144.02257553612  | 127.265200736376 | 153.436974478757 | 163.66696652324  |
|         | 178.323615832679 | 188.943404504867 | 189.542991004953 | 154.612425659555 |
| SMN1    | 44.3734692860793 | 45.04437764097   | 41.8291484190524 | 43.9744941494111 |
|         | 44.3166120733789 | 47.2688410084982 | 40.745874931373  | 43.7839209303388 |
|         | 42.8036731479932 | 42.02667925031   | 44.6708453138373 | 47.834436078111  |
| SMN2    | 46.6348258763289 | 52.9603588177082 | 48.3847843498476 | 46.1673159982664 |
|         | 51.6869155634183 | 44.3648993568405 | 41.3594868055879 | 48.7814131120945 |
|         | 57.678188678075  | 40.3235655331796 | 44.1148826235374 | 51.3244198342335 |
| SMNDC1  | 107.466490458133 | 131.068763088422 | 106.816835590007 |                  |
|         | 148.059385111127 | 137.878417253635 | 120.789309915619 | 140.51841571801  |
|         | 119.947688643528 | 103.767582317247 | 141.649461526745 | 127.863441809606 |
|         | 151.641746442323 |                  |                  |                  |
| SMO     | 61.2130609867477 | 53.8499082625091 | 45.4865173433646 | 50.2163892855092 |
|         | 68.7911855725594 | 61.3620062177524 | 79.2701322339022 | 59.8760452220989 |
|         | 51.8083208406279 | 61.7502624458447 | 62.6048727240291 | 49.6629259325705 |
| SMOC1   | 41.483412492426  | 44.5884811528117 | 37.8386378737561 | 43.0016969050339 |
|         | 36.5393857306744 | 47.5216423686268 | 36.634024014558  | 41.4905114972525 |
|         | 38.8495095797881 | 37.4642807402741 | 38.3684202018524 | 36.6603338274678 |
| SMOC2   | 140.961217055867 | 88.5706300816555 | 59.2778887402357 | 83.1614238528477 |
|         | 55.6991707857987 | 465.595459259015 | 41.706879587091  | 78.1448136847078 |
|         | 36.0741672064298 | 246.20973320244  | 233.263058459431 | 143.624756920887 |
| SMOX    | 124.512081978396 | 61.2679059816982 | 61.1630754250653 | 103.252085427319 |
|         | 88.051652677564  | 53.9517841438975 | 68.1969125201241 | 151.880209200879 |
|         | 58.2941346100716 | 57.013135787334  | 59.8310166399187 | 59.2849754108299 |
| SMPD1   | 47.2862299990938 | 53.0063130674306 | 51.1347974668251 | 48.3772965749984 |
|         | 47.4548471240051 | 50.2729836196996 | 44.6032218589199 | 51.6046415904452 |
|         | 43.423558862426  | 44.7520317855773 | 49.319499137678  | 46.201352759435  |
| SMPD2   | 68.0700069295224 | 78.1204313889396 | 87.104092810486  | 56.4578213622965 |
|         | 57.9161791762225 | 44.7804080899431 | 67.6767845246581 | 271.900886756161 |
|         | 60.7942162859036 | 59.5785089386245 | 76.153346954349  | 62.0967404944031 |
| SMPD3   | 58.1027665533767 | 39.1982470626863 | 43.6670755115848 | 44.550322123994  |
|         | 41.467005949568  | 38.2293008890613 | 40.7910160811527 | 42.8482181313226 |
|         | 38.9834959368496 | 41.9666541498638 | 41.9908237694988 | 39.6352613956998 |
| SMPD4   | 58.1868359012515 | 48.7847528954724 | 45.2313723727673 | 41.8778873678551 |
|         | 46.9906120932727 | 43.2805590023412 | 46.9929836306816 | 56.8094693588238 |
|         | 48.0163377492228 | 41.8613406887824 | 44.553780984244  | 52.2832912331043 |
| SMPDL3A | 133.911556922212 | 137.509582795609 | 110.734219768388 |                  |
|         | 124.214669663291 | 72.2016884438365 | 128.374733248762 | 60.726977722583  |
|         | 83.4679576894911 | 57.9279989359711 | 85.1544284060549 | 88.0877175295544 |
|         | 84.056083317311  |                  |                  |                  |

|         |                  |                  |                  |                  |
|---------|------------------|------------------|------------------|------------------|
| SMPDL3B | 82.3591293655947 | 58.5406981871153 | 51.2616687955021 |                  |
|         | 74.9516438365174 | 64.3571664944642 | 43.5286328921307 | 73.4820932957859 |
|         | 62.4219686957673 | 56.8622704143595 | 50.7390160399184 | 50.8485682149772 |
|         | 46.7182294568603 |                  |                  |                  |
| SMPX    | 42.3620028137457 | 40.7952353240579 | 41.6550823405646 | 40.7481155008596 |
|         | 39.8198309498737 | 45.9980734733005 | 40.8681871019812 | 42.3887531663733 |
|         | 36.5474283500601 | 45.9426591985894 | 41.7627910693483 | 43.5738557773903 |
| SMR3A   | 36.2496364442264 | 36.6968906669565 | 38.9790184198145 | 42.6913548400127 |
|         | 45.1137938810047 | 39.9397419279057 | 38.941855825269  | 42.4580504587581 |
|         | 38.3418933808844 | 42.0621425894624 | 40.3452320167286 | 37.8490162439785 |
| SMR3B   | 34.6977013306396 | 40.6380495994768 | 40.5734458834617 | 48.309866878365  |
|         | 45.5809132232681 | 37.5887129572848 | 45.6042625176633 | 36.0306975524309 |
|         | 39.853866204927  | 41.2276963324981 | 44.9713479185144 | 33.6902293666089 |
| SMS     | 693.727004855319 | 337.736535374405 | 258.038442651578 | 438.50123471613  |
|         | 302.79352975792  | 554.551745559065 | 813.242005949542 | 750.151825182993 |
|         | 517.216393517181 | 260.426488908824 | 270.487135967976 | 500.549865625701 |
| SMTN    | 124.791747507205 | 136.190823415283 | 105.277476070937 | 97.0254711947754 |
|         | 139.414044294473 | 1640.74027400791 | 86.0796981361148 | 131.67159377585  |
|         | 80.2680308979464 | 773.781266760336 | 1164.71243740122 | 595.012422454829 |
| SMTNL1  | 36.2496364442264 | 49.4067286971348 | 43.6670755115848 |                  |
|         | 44.4367387274922 | 45.3675390992851 | 43.0860383229288 | 48.6395795163502 |
|         | 43.7396619462033 | 48.9931786790166 | 48.9826868640753 | 38.3684202018524 |
|         | 40.8681871019812 |                  |                  |                  |
| SMTNL2  | 38.0089018744739 | 36.1232327599945 | 34.2890785915814 |                  |
|         | 34.3595588146954 | 51.6869155634183 | 54.0382756991549 | 57.6643188499117 |
|         | 40.2382908228517 | 37.5469247328848 | 44.7958122466628 | 38.6662194645633 |
|         | 37.2810767789306 |                  |                  |                  |
| SMU1    | 57.50915811428   | 62.3983214098965 | 48.2883694323339 | 68.0471049167726 |
|         | 56.0477607422828 | 70.1074782747874 | 56.3376046940285 | 50.7364620410977 |
|         | 53.5224822626949 | 55.2214187655851 | 56.3106156221316 | 67.5047089908724 |
| SMUG1   | 284.575587310164 | 205.806939441015 | 198.54718783437  | 232.13042919324  |
|         | 204.089652936303 | 150.801729138762 | 310.120875196999 | 451.290681710534 |
|         | 389.481124074714 | 253.010885406317 | 250.832808506455 | 207.632489510045 |
| SMURF1  | 49.8304479381623 | 45.2556760873335 | 46.7800033479223 |                  |
|         | 44.3638402537972 | 47.1635381911975 | 43.3269087731399 | 46.3057385979341 |
|         | 48.1182514902212 | 48.2123120250343 | 49.1200355938198 | 54.4140381300469 |
|         | 53.2046867327331 |                  |                  |                  |
| SMURF2  | 45.6517320730042 | 46.5650556481721 | 44.0451487108213 |                  |
|         | 39.9697332660833 | 47.2074332636566 | 42.6575535390785 | 39.0458123429605 |
|         | 41.1575777497576 | 37.2810767789306 | 36.8059561571675 | 43.401782064778  |
|         | 45.3763275588341 |                  |                  |                  |
| SMYD1   | 37.9387791625384 | 37.8217989841918 | 39.5450079747895 | 37.29566077996   |
|         | 35.6434124419782 | 30.0771630269067 | 34.0777108441756 | 34.1806289878747 |
|         | 35.7973685350741 | 36.3612409063792 | 35.9563099719284 | 33.1559412791294 |
| SMYD2   | 84.9970776435852 | 121.236881661832 | 143.590160385066 | 83.955786676926  |
|         | 127.1365842097   | 77.0226403968683 | 102.00080367858  | 110.146992754585 |
|         | 96.6957892186886 | 82.3181867658154 | 70.3757673501097 | 87.1109435144663 |
| SMYD3   | 245.060552951511 | 249.704644191338 | 158.958308702808 | 169.582135138401 |
|         | 129.613152757362 | 153.081027338185 | 252.061166074743 | 320.086549121732 |
|         | 315.799449362526 | 168.366869831376 | 168.78407943637  | 181.966839676473 |
| SMYD4   | 86.3533120291957 | 97.1271615802556 | 110.734219768388 | 76.2591822114739 |
|         | 85.2849531543957 | 139.625593914573 | 121.195506364658 | 82.6246523811721 |
|         | 79.0276852011359 | 155.855834721836 | 142.192315159235 | 128.981582396627 |

SMYD5 48.4849194706125 49.7363778831003 53.2046867327331 59.0965219753805  
58.7460488758053 42.2577689927563 56.7780520416533 60.419911425109  
55.3122077514658 62.8201270538435 72.768998788927 49.6629259325705  
SNAG1 41.2424637338424 42.5269793679335 35.5220586859301 37.4223289687135  
45.4751076037511 40.3357777530419 42.8684958525042 39.3709357615493  
41.3803269429468 42.5664883002833 38.956280281655 38.3291713594599  
SNAI1 41.8409927585705 39.9697332660833 39.8299340037009 50.7046706880325  
41.3755760434934 41.2567470068038 36.4098694708483 43.2551508830106  
44.1519466943185 38.6454098044474 42.2618615571566 44.4475838947656  
SNAI2 184.377148097206 154.707548614663 283.21175871127 156.884346540644  
170.287619901365 238.164418453962 50.0088611244948 84.8948024208923  
168.247603128156 115.853867920678 133.981674663494 92.3388129097482  
SNAI3 47.9175508887533 44.3529919625344 53.5698357689852 62.3936376596431  
41.467005949568 41.9543948167375 51.3064929551674 46.7980335276155  
52.0583273941813 58.2818491355907 52.1788489555942 44.1452943804044  
SNAP23 91.9238405195899 121.354667375673 83.8679756709676  
123.841740274811 123.868848519181 122.988056802699 104.599492214295  
77.8946473414547 83.6610321130843 66.4510869175159 71.0369238830779  
108.700838142885  
SNAP25 60.9710783023013 51.2405397507224 49.5424425850549  
134.952392466784 53.7554360529143 58.6838326806372 282.840679491909  
75.9298650598599 45.6582729799009 57.165971310746 48.3570240922825  
50.0159415986047  
SNAP29 78.2644076847509 76.8027974030779 97.3066473777771  
105.934378627264 117.502489192855 124.751020763508 77.9028721785469  
94.7718338968252 115.482982633699 89.1516394894484 81.7967230859562  
109.889322825648  
SNAP91 41.2424637338424 60.4646208319121 35.8265993915844  
45.5869891570251 44.9936360641969 42.157627240486 40.0052661202207  
256.426184741007 40.0403898620771 60.0372015630618 49.0361180089431  
49.8253396161069  
SNAPC1 115.509409633975 70.6766758400822 96.4740168904128  
140.030757545662 70.6225093592927 77.2834482217973 97.1271615802556  
201.427008153788 73.1640951333742 150.006891243837 137.802147212644  
129.675613712326  
SNAPC2 181.064239330482 135.706144105357 121.423421895502  
133.1387411908 156.822939275312 239.885284409329 135.866407965991  
137.496822743899 152.250444470971 232.402174615698 196.561401686392  
158.321459945365  
SNAPC3 66.3950913662841 79.7434272763658 64.2142377236452  
70.7202372217584 102.457537266105 68.1311562787361 83.1392079778036  
84.4349803529132 66.6341661477487 73.7800733276454 66.3944891131864  
70.7760293129408  
SNAPC4 564.929183025034 394.437597863822 206.559526386642  
158.071355628454 445.016226732679 190.940906139713 425.692369974286  
322.300347485889 174.559216176175 301.594300620246 286.456276735451  
197.421622315466  
SNAPC5 54.6235981131919 50.543526404059 63.5107036952143  
54.6089451252049 48.6224651100733 63.8740412329753 58.6431245059655  
69.9709625205629 52.6561576154021 50.6486940895674 60.7516146716018  
73.1447139654971  
SNAPIN 39.4710743516517 37.8217989841918 53.4743535852344  
39.7411455670172 46.6397391251762 45.4882438975269 41.706879587091

|            |                  |                  |                  |                  |
|------------|------------------|------------------|------------------|------------------|
|            | 51.2623287419357 | 50.4974478884077 | 44.2580151149956 | 44.6286581923295 |
|            | 53.4735821194294 |                  |                  |                  |
| SNCA       | 63.5693267269002 | 48.4497719907777 | 58.5608019141219 | 280.920208331594 |
|            | 53.8260140375214 | 116.725539898394 | 59.3549213146532 | 56.9621724830201 |
|            | 94.1050519074545 | 115.235144612428 | 135.997802304719 | 377.679662622526 |
| SNCAIP     | 383.705244574204 | 70.4933405598359 | 41.437237454134  |                  |
|            | 140.894046694804 | 73.3533274030352 | 83.8726595797859 | 40.3302268293707 |
|            | 69.0819394834919 | 61.2510119532409 | 57.2813205536176 | 63.1566669782858 |
|            | 49.2064066614865 |                  |                  |                  |
| SNCB       | 42.9582729416601 | 41.3366779545815 | 39.991353369336  | 39.4433784795209 |
|            | 42.0307950606254 | 41.0582900711341 | 42.1157692936428 | 37.6557714476853 |
|            | 39.8048943625718 | 39.9948390976317 | 40.6695495527761 | 39.3575468494941 |
| SNCG       | 68.6627996695828 | 697.57030127315  | 903.756866967447 | 51.223859150798  |
|            | 523.25106120389  | 152.95751212223  | 427.818758455214 | 91.1834104205004 |
|            | 505.018127833201 | 687.011162822211 | 557.275332269647 | 642.946369683508 |
| SND1       | 495.705224781189 | 487.540800793233 | 372.982648892131 | 673.002926695262 |
|            | 592.010988342149 | 720.90955999917  | 424.87896140215  | 426.622204035624 |
|            | 632.577797921655 | 402.794855141389 | 479.079946537291 | 324.506136847875 |
| SNED1      | 39.0102066700839 | 40.3180310664156 | 39.6894175734463 | 39.5748670524951 |
|            | 41.5335058664597 | 41.6086894860496 | 38.4428081526233 | 37.6126279002007 |
|            | 39.983244606774  | 39.9479806809296 | 38.6662194645633 | 39.9519547348106 |
| SNF1LK     | 115.10044062133  | 299.74710723735  | 182.31306890697  |                  |
|            | 202.751918610777 | 267.85990321012  | 144.593933058291 | 150.875092086496 |
|            | 567.675954219815 | 256.675896425075 | 349.371668774717 | 107.538934056558 |
|            | 205.413872130332 |                  |                  |                  |
| SNF1LK2    | 48.2910530887214 | 36.2103905554984 | 38.0452862258803 |                  |
|            | 59.0965219753805 | 50.3713170502557 | 54.1440452292081 | 37.7136011474903 |
|            | 47.2009420656854 | 45.0997987980157 | 51.9547984751408 | 46.0095710163378 |
|            | 45.8546719310325 |                  |                  |                  |
| SNF8       | 123.350559552455 | 63.8399092891728 | 75.0377156190383 | 69.8314582428552 |
|            | 99.571118823509  | 83.5274372175811 | 105.666698877424 | 111.153589230866 |
|            | 111.532958750074 | 81.1925839235551 | 92.3388129097482 | 93.4180535865914 |
| SNHG10     | 41.7397731376692 | 41.0678614026819 | 43.1931731665131 |                  |
|            | 41.0726336841311 | 43.1252272136667 | 46.6872654833579 | 40.0052661202207 |
|            | 39.6474008369935 | 34.226171989766  | 42.785429206422  | 37.9946685306274 |
|            | 43.6753843488695 |                  |                  |                  |
| SNHG11     | 57.6913861717513 | 88.5706300816555 | 96.3741876853801 |                  |
|            | 76.0975301977715 | 81.7765447802116 | 59.3618843678775 | 101.46584765758  |
|            | 60.0835531094681 | 92.6230008876347 | 101.759714275976 | 79.369045905319  |
|            | 73.9192243586276 |                  |                  |                  |
| SNHG3      | 36.8072833828297 | 41.7337506166619 | 41.9666541498638 | 40.4359177791566 |
|            | 40.7779767565889 | 46.1513019317765 | 45.7452456977857 | 42.2577689927563 |
|            | 39.3750969348308 | 38.745552403895  | 44.7114813656401 | 45.4799270968969 |
| SNHG3-RCC1 | 114.84900130932  | 119.808125185521 | 91.903810379105  |                  |
|            | 70.3646137594581 | 181.772001042799 | 67.5255471827784 | 199.035083736742 |
|            | 185.079035617027 | 158.334581991361 | 103.67004664951  | 108.599492114105 |
|            | 100.824660338235 |                  |                  |                  |
| SNHG4      | 46.8954576545929 | 45.1694246393676 | 53.1491634301682 | 40.9607305725196 |
|            | 88.3954618645976 | 45.6129956328415 | 41.3594868055879 | 45.3872406432794 |
|            | 50.5785738734431 | 38.6454098044474 | 39.9899430628542 | 45.3763275588341 |
| SNHG5      | 392.237227927376 | 662.848386826617 | 612.642648319981 | 244.560715635796 |
|            | 116.778318821987 | 687.011162822211 | 309.802432824498 | 465.430886956232 |
|            | 134.152059562322 | 455.223217772744 | 909.08582922255  | 689.738256133922 |

SNHG8 42.8539910132415 50.1520209533747 47.2962360458401 49.6479308322777  
46.6397391251762 40.9506062495231 48.6395795163502 48.1591264215184  
50.2223403889892 44.1379638573455 43.0710577955487 45.6233434183356  
SNIP 38.1169703906207 36.5219488315447 41.2365089689635 37.7469621225553  
40.3452320167286 36.4986986135769 42.629412460409 36.0306975524309  
43.4656637536244 38.1042454705119 41.4508241771315 41.7575097298927  
SNIP1 60.0793579902362 75.6614221167993 71.1521292570086 62.0404348860702  
88.7928773498158 77.6115604215716 77.7615826856723 78.4815128101967  
79.5488891958168 70.3629652777935 70.8670844767965 74.0614295574729  
SNN 41.4508241771315 58.174555206394 55.094385444315 51.949834638817  
46.5557478175976 55.4694986901287 44.6032218589199 46.695848687694  
53.3094843669564 51.8412522234186 50.5188367542048 52.9609836781499  
SNORA10 62.8635815439291 95.6662924228901 101.935321521672  
75.7666827480067 126.088821850066 60.9822577063534 63.1604223919703  
63.9851732498913 60.7480970026669 73.4447529556358 65.6010220593397  
65.3585701203568  
SNORA25 72.2099571536717 81.8426140611297 71.5484567134601  
66.224559122062 105.317399386109 53.8461734834857 69.4677195088043  
57.9713749600418 63.6222532132037 102.607924735378 103.883220270094  
104.573463811298  
SNORA32 63.4610447573417 44.5152708955623 51.3268475761593  
42.5664883002833 60.4122350478242 47.8636003588181 43.1931731665131  
49.2019743609873 45.0997987980157 43.9450023643394 51.3861659123096  
47.3992733452821  
SNORA33 94.8260360398356 75.41408189458 132.223745961048  
77.4676205299631 107.976192446474 59.0686629877982 94.8766888888828  
94.1206342908306 75.9909523932333 119.979854891563 144.657263336504  
115.064217549212  
SNORA62 44.2350046179299 58.174555206394 54.7855575216687  
49.3654837541353 85.5362566454799 42.8598805316863 43.8206425661746  
47.5950227477807 55.5086026637973 42.785429206422 50.7159667633757  
43.6753843488695  
SNORA64 60.6441065119394 67.7189686993694 84.8948024208923  
51.3851157261451 98.6553805168141 55.9351706773613 59.0457625163577  
65.0656365694468 52.5772854102326 50.22432299342 51.5822637582617  
52.0359304386476  
SNORA65 55.0078788655089 67.8208976798364 59.9690744676539  
57.2856683017619 70.4607501403122 48.6621527194963 57.1070449050465  
72.3822545261582 44.619512785899 51.1169368198437 45.390192977585  
47.1060577218993  
SNORA66 41.4508241771315 48.3077814647455 43.6670755115848  
36.6501141438378 47.2074332636566 36.2015763253919 37.0564573649223  
37.9837233601316 47.1744296124496 37.6383530120621 46.3370338074996  
44.4475838947656  
SNORA70 195.205980592503 354.38923772101 357.668448180268  
201.208357379329 973.363245512859 206.899594905509 203.53267380432  
268.097966292089 204.710892826638 195.968119243879 203.53267380432  
205.121208974511  
SNORA7B 79.7564155881026 69.8505620106065 87.6178717341967  
88.5511408870489 118.885205874725 79.4053001255904 105.05842887748  
127.596368103014 65.4784797364469 72.2443746456494 80.3500323413132  
91.3112603277315  
SNORD100 72.2099571536717 68.1040271620925 82.5344501505114  
68.0471049167726 73.0433648756396 55.3202238943712 71.0369238830779



80.1144023887293 56.657759220121 100.076931518374 106.20479137406  
73.2234405348435  
SNORD101 37.8386378737561 45.0115870036541 39.7411455670172  
37.8442841690502 35.6434124419782 35.5158505219112 34.0777108441756  
37.86982638952 36.4476883897928 38.528621456378 36.8282383070068  
37.4554876386402  
SNORD107 43.9309845324767 38.1312950900467 40.301483914446  
39.0156305603334 42.269054475455 39.5581166303303 42.357910063876  
38.4540849632254 40.3316153483289 41.3641352453779 40.4094901248527  
41.6550823405646  
SNORD108 38.957687788868 35.3307157989724 38.9790184198145  
41.4273122914951 39.4693871570028 39.8455060654531 39.5496902678788  
36.8400213077707 42.7150227340364 33.2987269789328 42.170702295259  
39.7411455670172  
SNORD109B 50.0466349801009 42.0709558258414 44.9758339877851  
41.8778873678551 44.5668141895992 38.1169703906207 47.2927436772465  
45.642304356051 46.6944238390932 53.6429962450784 43.3085358214154  
45.4799270968969  
SNORD116-2 45.1912496459517 40.148780650831 41.1367478979484  
40.4359177791566 39.7568367479301 46.8954576545929 42.9803717121865  
38.1835938174625 39.7537274655115 44.4652605017595 42.2618615571566  
44.3521099857368  
SNORD116-4 38.5007204246293 37.920964499903 37.8386378737561  
36.890925044696 33.9142669203111 35.9305494063137 38.7337086062875  
36.5393857306744 42.992884918158 43.0919221375514 42.6366765186182  
37.1747156131306  
SNORD13 140.532496807694 109.386655134289 78.3378279021752  
1307.19925493293 77.2608629053098 556.728676214581 137.916048669047  
368.727384734032 59.9108736364178 390.740971459177 276.59189773139  
82.6157566292355  
SNORD14A 62.3042205863409 154.869301720717 90.1284518302601  
85.1847490113446 80.257554904218 60.7488007939604 59.3549213146532  
79.8264217848103 66.603126065489 110.785049776763 82.2519263268941  
77.7506984396769  
SNORD14B 42.6036491382658 49.6841415268611 47.9035532886869  
39.7411455670172 38.9496515344837 44.7804080899431 41.706879587091  
46.3685439301234 48.7358147030082 41.2276963324981 46.1673159982664  
45.9693232070002  
SNORD15A 43.5710871617107 38.6414316877471 43.9450023643394  
44.4367387274922 36.08956004634 36.0306975524309 39.7576136507593  
44.7044140979108 37.8319142847141 37.7315666632629 41.9908237694988  
33.0217499673686  
SNORD15B 53.8856501960117 52.1062000766427 50.6987358483181  
52.3004056941891 64.6374507338031 48.8744644207821 60.0981687048269  
67.3976855661302 54.998510746958 58.5087296620514 51.9302027391447  
51.2318935933116  
SNORD16 45.4799270968969 56.6927078228789 35.2101597814352  
43.3078542962968 56.6951078698291 46.7800033479223 44.9863726205428  
44.1311654985682 51.3511088648386 45.2556760873335 42.8263096141654  
40.1700117452801  
SNORD18B 37.8386378737561 38.8336427948187 43.7630587657205  
54.2886483704949 37.2567512265363 34.2773859804062 41.8315602975157  
39.853866204927 42.992884918158 40.7063426028871 40.547835538778  
35.3525469364579

SNORD18C 42.2455707947223 40.5400384479766 36.5474283500601  
42.1273928203021 44.9936360641969 44.0804700754786 38.1793598983615  
37.4484310268909 40.8970401536578 40.8970401536578 40.4504608195666  
43.2776458914333

SNORD21 52.2236479204029 49.9085372049438 71.0340758556049  
51.7739270955254 52.9433495155796 42.8598805316863 47.2927436772465  
61.3077641493507 48.1174861108648 83.5069968129733 75.5799609581534  
66.0224755625662

SNORD22 50.1533437545239 48.3077814647455 55.6865353018811  
58.5406981871153 62.3233491851723 45.9266745571724 43.6753843488695  
44.1311654985682 46.8873421271259 44.3648993568405 45.5707650534259  
42.2577689927563

SNORD25 50.2203578628217 81.6529991377083 50.6987358483181  
59.4674205670657 114.363816429963 47.5733603903505 55.5578334877425  
47.2864663693787 63.6222532132037 64.428683021978 59.5830868881343  
46.917149434588

SNORD26 43.5710871617107 40.3384318592985 38.1421709520616  
42.5664883002833 40.6723334103791 42.8598805316863 48.0283573444179  
41.6466169548846 38.5252456306656 45.2556760873335 43.844855336215  
41.6550823405646

SNORD27 44.9896851005259 31.7145380049678 43.6670755115848  
36.7892997857376 40.7779767565889 40.650742261428 38.5066108855005  
41.8417024632349 41.6616444147804 38.957687788868 42.170702295259  
38.3291713594599

SNORD28 37.1485601150873 35.6434124419782 34.4716904283753  
35.314469458379 35.1411239266238 34.6977013306396 40.1235656101329  
35.3608605269276 35.860430241131 32.9981302187884 36.6298807161755  
34.4570158133896

SNORD30 46.8954576545929 61.8492980174846 62.5610562594275  
46.4555908533915 129.096406048173 47.2927436772465 61.0979269700412  
56.6910078150745 54.1745577382276 40.8970401536578 49.9338905397767  
46.6397391251762

SNORD31 61.9504984796308 96.1710806345503 87.455991111513  
53.8086134112366 185.165420581989 58.5530199658661 80.882176929636  
66.0303950772736 80.6434122355417 63.5107036952143 59.0537479001842  
48.27609330316

SNORD32A 50.315768338317 53.8499082625091 54.6820069269589  
46.0228732507872 72.6675345946258 55.1987351219665 44.4639405506967  
48.9826868640753 56.3441077510744 48.6124127998952 46.3370338074996  
63.5693267269002

SNORD33 55.6268253440479 65.7457567201236 66.1541420734416  
81.6780581904253 100.205124008648 53.9517841438975 64.7023558190673  
87.6435494489518 74.4958282816601 72.7502212566295 58.2941346100716  
116.927619635255

SNORD34 43.2724556187214 51.7983110178095 53.3127618245672  
50.378948785456 51.4527545197672 48.6621527194963 48.0283573444179  
52.0503062610092 49.2879849674517 52.7972156492746 47.1477056711335  
47.5025821041537

SNORD35A 55.4004611309636 54.0461131287999 70.18107651423  
65.524821699432 69.3468840908665 47.7556758818053 62.5506324864207  
74.2517888452553 74.5694657001572 67.6169355376864 59.501103909345  
67.4197263416701

SNORD35B 44.9896851005259 75.3462586192013 54.6051538001037  
56.4578213622965 129.352472514981 49.8472708021525 54.4934782594218

56.6910078150745 56.1172088979505 53.5498255316009 52.104880481326  
47.3992733452821  
SNORD36A 48.5835484742456 52.502055890816 45.8844325913247  
41.1886975241176 63.955655956484 38.1169703906207 53.7423898357583  
48.4670130605028 50.1603795873336 43.844855336215 46.4205654140754  
46.917149434588  
SNORD36C 54.7786516309154 54.7855575216687 54.2670850492947  
46.8954576545929 65.6003544901554 37.1317006162938 52.7002314230604  
58.5406981871153 52.6561576154021 68.9115937148858 54.9765783642973  
56.9379721393904  
SNORD38A 47.0940613507321 47.3536182445315 53.8724557170772  
45.1944222548351 53.6907197364586 43.6670755115848 43.5627649099623  
63.3768687067745 39.7537274655115 53.3059058105836 47.6884372645373  
51.138877923954  
SNORD38B 42.9104454767916 40.8880530359822 42.8270038153139  
36.264823544143 37.0526522140242 36.6271061451613 40.7910160811527  
45.8669209716694 42.1594905198929 43.6033221838149 44.0409178714232  
41.863927676552  
SNORD42A 40.8681871019812 37.2810767789306 36.1042012504758  
36.0481934423077 34.7018263647985 29.745266251498 37.4772922422734  
34.6977013306396 39.4762546236449 37.920964499903 36.0481934423077  
37.8490162439785  
SNORD42B 42.7150227340364 43.0227387991135 44.8872784170036  
46.8954576545929 48.3814421939888 45.8325181856483 44.4639405506967  
46.3685439301234 40.5912213523345 40.5090849993014 41.1638563416981  
48.1627097465883  
SNORD43 42.2455707947223 40.3384318592985 36.2683886571585  
40.5484717678957 33.9142669203111 35.2067831864574 42.9803717121865  
46.0633179231318 43.1805016690297 41.7405682794166 45.390192977585  
36.6603338274678  
SNORD46 58.3702889417801 57.7757446006652 68.4720753153522  
49.3654837541353 83.9387217886961 44.5544727111028 68.5725871332774  
64.6316818494785 62.9922928277769 204.089652936303 120.577102943782  
60.6653636336244  
SNORD48 53.3967242431461 48.275452803061 49.7350276169552  
65.8926843080114 67.7155610106537 47.2927436772465 48.6395795163502  
45.642304356051 41.2870505273664 44.3648993568405 44.3763859390287  
49.2064066614865  
SNORD4A 53.4921736109774 81.1416376689959 65.49167373382  
47.9915414951747 89.0203733091224 45.3882138838137 75.5830548489892  
77.6174893940285 60.8635925649592 66.5422130374814 73.3321469094819  
66.0224755625662  
SNORD4B 49.8472708021525 51.7983110178095 60.6567691532561  
46.614092935749 59.9326265577462 45.8325181856483 54.339958888486  
52.8622615027833 59.9770720847728 55.4037482627222 61.0979269700412  
55.8087097725119  
SNORD54 44.7915315085948 41.2598458726002 38.6727842796202  
40.3180310664156 38.5512429290626 40.3357777530419 36.634024014558  
39.9576138799997 37.3600014814388 41.1222709786153 44.8872784170036  
40.2669497398702  
SNORD55 52.8427643366617 54.2445399731644 52.3432130135266  
47.481302504066 40.7779767565889 51.1621379498014 62.1970616836737  
58.676230030835 57.7865070833351 104.557637353314 68.3157692917711  
51.2318935933116

SNORD56 66.5500089527674 67.0402749076279 66.603126065489  
57.8277957325085 100.205124008648 52.8421046802739 74.2690269784394  
63.1604223919703 51.5229124652769 90.1696131791736 82.6602736441839  
56.361708620372

SNORD56B 42.442231667357 40.148780650831 40.7620472083159  
48.1662933382789 43.5544347011646 41.8613406887824 43.3262148375525  
43.0390857698452 40.5912213523345 44.8997235283254 43.4709415392696  
42.57175366709

SNORD64 37.1485601150873 40.0527893189096 36.1042012504758  
38.745552403895 34.9062568194127 40.650742261428 44.0687697278114  
37.2237132058632 41.074824727477 40.7063426028871 39.4410515050885  
36.6603338274678

SNORD68 77.8130233266962 110.214922820817 119.434418653131  
115.913030448537 83.9387217886961 104.964345794911 139.758805241617  
95.491982090349 85.2598847559951 205.086228002776 193.395549316561  
71.0340758556049

SNORD73A 41.8409927585705 46.9919960628953 49.3780606970538  
44.0451487108213 43.004943518025 42.6575535390785 46.9929836306816  
42.2577689927563 41.7627910693483 42.9866214102525 50.0303076717704  
46.2625470410195

SNORD83A 40.8681871019812 45.4882438975269 36.4564050256915  
33.9645433044281 34.2638875325204 38.5252456306656 39.0458123429605  
40.2382908228517 39.0775870687758 37.7315666632629 40.0766543123257  
37.4554876386402

SNPH 46.9939712192224 43.5873188565519 46.6588655218735 35.8472302065546  
44.8897737954573 45.9266745571724 44.2166118829877 40.7311497914871  
49.9162522057712 41.2276963324981 45.0589947942306 44.0451487108213

SNRK 148.130140385248 175.441884261362 174.492066109537 249.451753363306  
184.989940464859 198.729330487352 145.120664806316 174.985336606027  
172.869292380866 178.961579489906 204.606913997301 197.923403667051

SNRP70 372.02379581293 565.411298018845 742.726253630865  
346.438778257772 814.991871217268 335.818251279914 464.671881584567  
361.57814355509 498.958550919515 483.882804472844 515.007705025879  
429.65084326307

SNRPA 204.251854342995 220.010492114456 205.789533350801 143.526781144716  
400.093769705765 206.146732318529 327.455030020799 325.450452751375  
289.17237603899 226.262409390222 250.585851778133 180.065047496273

SNRPA1 927.61341837276 1077.94530110976 513.57613902662  
492.519023728038 1279.02702402372 456.992521713593 1043.26325848938  
690.568858101531 1052.16097214718 580.444451816014 525.35784336478  
698.350485654135

SNRPB 986.40790007743 1182.86447291773 687.862452802453 778.723771259404  
1455.64106630257 598.404003732481 2024.4791883541 571.790034754076  
969.805093523651 468.573956652904 521.874349042344 565.72800641089

SNRPB2 380.988918630713 461.394007153992 336.159430045964  
595.790464730847 603.224267841548 581.396808977873 721.266942608349  
450.008356194664 347.196922795214 253.683753201667 291.42149037871  
387.311743342483

SNRPC 223.356945665761 202.103107745135 206.899594905509 182.448444305445  
225.120999402048 172.221482103025 252.206029058968 168.269510102657  
210.958578914607 132.242070552057 122.877322487518 159.99819920335

SNRPD1 57.7877627794725 56.2305155589239 62.0008474085033  
61.2213001749372 82.6157566292355 60.7488007939604 57.1070449050465

|        |                  |                  |                  |                  |
|--------|------------------|------------------|------------------|------------------|
|        | 61.130286531713  | 85.1920126487447 | 52.8928296360463 | 56.9320717885002 |
|        | 57.8111054584154 |                  |                  |                  |
| SNRPD2 | 2178.59848996529 | 1769.18069954113 | 2071.90741263566 |                  |
|        | 1839.09068171097 | 3749.78281766196 | 2061.66570137425 | 2951.88559311416 |
|        | 2672.94421680196 | 3465.3013599062  | 2465.65854657837 | 2220.90215179682 |
|        | 2465.65854657837 |                  |                  |                  |
| SNRPD3 | 50.9381343674699 | 110.559251404688 | 81.1249338842464 |                  |
|        | 65.084620579901  | 125.424626287985 | 91.2681347227088 | 146.701131209299 |
|        | 45.1714698794331 | 61.9682048429354 | 46.6598879466655 | 60.6505672212119 |
|        | 64.650642183463  |                  |                  |                  |
| SNRPE  | 41.1523487516364 | 38.4757888225478 | 45.0985088502363 | 38.6835649080278 |
|        | 43.1252272136667 | 43.3269087731399 | 41.4369824439795 | 41.9315419791594 |
|        | 39.1790517315259 | 43.401782064778  | 42.2618615571566 | 43.1805016690297 |
| SNRPF  | 721.887210480162 | 1159.77262479002 | 919.542051089664 | 540.304257899761 |
|        | 1810.67209360676 | 669.19065220034  | 1559.50766982801 | 977.776395810338 |
|        | 2061.66570137425 | 404.265659915313 | 581.396808977873 | 886.75789054784  |
| SNRPG  | 3761.48462220262 | 1664.00821059181 | 1607.73526966988 | 1914.9556343048  |
|        | 2633.34100695103 | 1378.37754822734 | 2921.68921750799 | 4128.92158369026 |
|        | 3282.4852236415  | 1511.33844030783 | 1468.75291542154 | 2440.77408185413 |
| SNRPN  | 182.31306890697  | 230.633139180542 | 317.777971035617 | 144.046404221564 |
|        | 234.043251639296 | 303.458085392002 | 239.117228656704 | 82.5607312771183 |
|        | 110.146992754585 | 260.85727391155  | 333.421080658854 | 415.759723627205 |
| SNTA1  | 113.704541686372 | 63.1137861754989 | 103.316970096472 | 101.144615206297 |
|        | 98.4847140916184 | 225.618853905635 | 94.1289383735162 | 91.1834104205004 |
|        | 131.929700183999 | 156.844010597219 | 164.44912535816  | 118.966448789057 |
| SNTB1  | 94.1967497986791 | 98.3240331951021 | 78.9701459806641 | 213.118335449552 |
|        | 75.6471706262645 | 84.3755392205436 | 72.1401612718245 | 97.1271615802556 |
|        | 46.581796165231  | 66.4510869175159 | 62.7743500747415 | 80.0919469092368 |
| SNTB2  | 199.23413224268  | 167.352766082239 | 229.512022912803 | 185.360921731157 |
|        | 135.567012693522 | 287.565588186962 | 196.322377166278 | 357.574415292533 |
|        | 124.815448107572 | 327.912730756303 | 351.188432232165 | 259.220844287491 |
| SNTG1  | 36.5393857306744 | 34.15544299189   | 38.4043916290561 | 39.9697332660833 |
|        | 43.2484996523549 | 32.6368705146258 | 39.3585350448719 | 33.3307770183871 |
|        | 42.9020321355927 | 33.7883338848419 | 36.8282383070068 | 38.0452862258803 |
| SNTG2  | 45.7356815244513 | 44.9370339275041 | 45.989212296035  | 51.949834638817  |
|        | 43.6587492470348 | 54.8265655909623 | 48.9826868640753 | 48.9826868640753 |
|        | 48.6494451061637 | 44.0409178714232 | 43.7585538437696 | 42.9887069977696 |
| SNUPN  | 151.472676874224 | 142.365344693239 | 113.82565808481  | 168.11088055793  |
|        | 184.50283792606  | 205.695230410884 | 247.074756460224 | 143.526781144716 |
|        | 187.957702651679 | 151.451107406752 | 156.220155161711 | 176.224645007435 |
| SNURF  | 143.590160385066 | 213.520663841371 | 249.584588371496 | 136.04447103201  |
|        | 198.360449141425 | 282.840679491909 | 177.602690452814 | 68.3372228877569 |
|        | 82.0993943936197 | 147.300356318739 | 181.2179249806   | 338.355170063433 |
| SNW1   | 54.4384603094793 | 43.5873188565519 | 48.6037684272115 | 53.9517841438975 |
|        | 45.4751076037511 | 69.2685201884906 | 38.4005795891396 | 43.9366081640576 |
|        | 55.6617952786921 | 47.2299678280724 | 51.838002904753  | 69.2213838763756 |
| SNX1   | 65.3071954258488 | 73.4331096065698 | 53.838484549134  | 54.9919060580109 |
|        | 83.5069968129733 | 158.685201053359 | 57.7096546601208 | 54.2877981508636 |
|        | 55.0334479749824 | 97.5394336319916 | 88.6905706130505 | 101.766641669845 |
| SNX10  | 74.5694657001572 | 45.0115870036541 | 56.8595344107711 | 309.293546994308 |
|        | 70.8749669449099 | 63.5738862549306 | 59.1774824918359 | 50.0526763693329 |
|        | 62.370559099758  | 39.5637454855233 | 39.3667161654772 | 51.0647893605839 |

|       |                  |                  |                  |                  |
|-------|------------------|------------------|------------------|------------------|
| SNX11 | 136.883475451494 | 92.2686401307542 | 83.6000059297772 | 124.738024302128 |
|       | 101.383978726419 | 102.559678338485 | 108.007227281411 | 114.113460279317 |
|       | 132.946528291039 | 111.877209777434 | 100.616027485975 | 96.6957892186886 |
| SNX12 | 46.0920218698606 | 54.3554233228353 | 44.696023817801  | 56.7927450229377 |
|       | 61.1216330559316 | 47.3791873993182 | 54.339958888486  | 47.0940613507321 |
|       | 63.955655956484  | 43.7303813515864 | 45.5707650534259 | 51.7833333848627 |
| SNX13 | 84.3850767822327 | 84.9182861692273 | 93.6591201235745 | 77.7973642829228 |
|       | 105.825228126465 | 73.0247140074919 | 58.0139597055449 | 111.845105854608 |
|       | 97.1271615802556 | 70.9702772728923 | 77.9085946827079 | 85.6038071277319 |
| SNX14 | 64.3061875690881 | 100.883604376864 | 93.4180535865914 | 78.5697118992327 |
|       | 60.6014434868965 | 67.2843631360108 | 66.4841955249254 | 82.5956705829173 |
|       | 65.0567596131122 | 84.3946154220195 | 82.5225075943931 | 99.6946103680372 |
| SNX15 | 44.1294459089314 | 43.826317180678  | 47.3381845358719 | 46.0228732507872 |
|       | 56.2937283136959 | 48.260931742163  | 50.5252048155459 | 47.8947595316832 |
|       | 50.9612733880858 | 50.2108280478333 | 47.6388115824631 | 48.6447083765118 |
| SNX16 | 49.906758177954  | 53.3175733763272 | 56.7776874358774 | 78.4289643729837 |
|       | 57.8039717833131 | 78.1351673826829 | 58.5588286084726 | 42.5435283762933 |
|       | 53.838484549134  | 78.3851687801705 | 61.0094935318105 | 61.9882398986333 |
| SNX17 | 461.83420090894  | 444.618035487523 | 559.296669575666 | 543.807654287436 |
|       | 541.631969808467 | 543.268021785502 | 513.891389190131 | 599.670771796585 |
|       | 515.856807472321 | 696.113365766871 | 602.441843384617 | 464.99944459917  |
| SNX19 | 74.2151462073098 | 110.746059249478 | 108.512469038407 | 114.876346000655 |
|       | 104.072423445726 | 103.343354834837 | 58.3675164086197 | 115.894467332637 |
|       | 100.294952875307 | 99.3956523785983 | 114.215602320391 | 107.91849682084  |
| SNX2  | 313.080592198795 | 247.966757890598 | 247.007210336963 | 517.216393517181 |
|       | 232.081000478989 | 476.653723741096 | 304.777565078155 | 288.335410596699 |
|       | 282.764445883135 | 240.217589414972 | 262.37779288036  | 361.632211543977 |
| SNX20 | 41.3785995857154 | 43.5873188565519 | 45.3974838013476 | 52.7924213633885 |
|       | 43.0723817756832 | 43.6670755115848 | 45.0283997415478 | 40.6663433492193 |
|       | 44.8997235283254 | 44.2580151149956 | 41.4860822396574 | 40.8681871019812 |
| SNX21 | 54.0478584942486 | 50.8114699212931 | 46.2625470410195 | 41.6564075217517 |
|       | 42.442231667357  | 82.0682043421788 | 48.8319884367456 | 59.526516100518  |
|       | 49.2879849674517 | 64.6446465846487 | 56.7429967489965 | 53.792558158226  |
| SNX22 | 41.3387790895716 | 41.0678614026819 | 43.9450023643394 | 39.6292788039793 |
|       | 38.8456942580061 | 39.4953494583071 | 55.695361644141  | 39.3709357615493 |
|       | 38.2215591930186 | 40.4136535208406 | 41.8168470823451 | 42.357910063876  |
| SNX24 | 52.7570461169969 | 39.5573415356949 | 44.9758339877851 | 43.7410507935043 |
|       | 42.039525923161  | 44.3648993568405 | 48.5544398725959 | 49.5544686779125 |
|       | 56.9097893863465 | 46.7182294568603 | 46.5952288260503 | 52.1918130336397 |
| SNX25 | 66.3950913662841 | 56.8373628733077 | 55.9459886217809 | 58.8224410806741 |
|       | 69.805066579191  | 70.2021753365478 | 69.3468840908665 | 68.8698243753339 |
|       | 71.787754116845  | 55.8510296341925 | 62.2025996860055 | 74.2180011215707 |
| SNX26 | 81.3544712349691 | 99.2824152850072 | 201.616017553422 | 64.898351831341  |
|       | 121.84142967836  | 86.2563919366781 | 112.805898501551 | 112.021971795593 |
|       | 116.839274984089 | 65.5349012839562 | 76.375769561992  | 62.5447504571181 |
| SNX27 | 434.841521967958 | 292.735673136799 | 564.929183025034 | 518.074074000609 |
|       | 500.431738940003 | 608.579654909865 | 401.403103922907 | 662.041552795049 |
|       | 392.796524588309 | 740.994425128952 | 681.474524031866 | 656.355333007615 |
| SNX29 | 82.291097567232  | 66.2366101899356 | 82.9449579428926 | 102.971363152434 |
|       | 62.6860949544223 | 112.873697337138 | 53.0277416531043 | 81.3978207813439 |
|       | 59.0563795877672 | 94.4129246851651 | 85.8277891453447 | 81.4881766238989 |
| SNX3  | 1726.90584784425 | 836.472724085903 | 872.305108096296 | 975.544591158047 |
|       | 454.939614583134 | 1231.77360353254 | 805.309720893073 | 1354.50256889331 |
|       | 623.574706535278 | 618.293140877956 | 695.255317861845 | 1093.84714207969 |

|       |                  |                  |                  |                  |
|-------|------------------|------------------|------------------|------------------|
| SNX30 | 115.221134337342 | 102.993620677265 | 91.0443726041992 | 153.153205095999 |
|       | 92.6736029146947 | 85.8059456975413 | 85.8154958329408 | 98.6401096175932 |
|       | 84.4938528830721 | 98.6289539570136 | 90.807818984128  | 117.355761277966 |
| SNX31 | 50.379587451669  | 706.914069768466 | 480.13416648493  | 48.309866878365  |
|       | 918.083610591772 | 133.163926420863 | 1032.44965920118 | 522.811631783729 |
|       | 546.287195443189 | 278.453446231317 | 349.096725048776 | 513.891389190131 |
| SNX32 | 39.1590964332473 | 39.6123051184545 | 38.6727842796202 | 49.9014504704021 |
|       | 39.5595233162192 | 39.7394181011603 | 45.3597029614942 | 45.3872406432794 |
|       | 43.6670755115848 | 39.9948390976317 | 45.8180710486329 | 38.8495095797881 |
| SNX33 | 155.01005229951  | 136.883475451494 | 83.5742879296932 | 77.7973642829228 |
|       | 122.642481894309 | 99.3956523785983 | 126.500059295217 | 134.407474121421 |
|       | 186.840847924376 | 168.366869831376 | 123.032006903803 | 94.3229189690855 |
| SNX4  | 173.100153934025 | 200.174103125152 | 129.938114164087 | 119.253559091088 |
|       | 207.051626712671 | 149.475318376458 | 218.701583105141 | 153.037055310357 |
|       | 172.221482103025 | 118.600699776727 | 143.590160385066 | 164.780216383719 |
| SNX5  | 87.6861665523251 | 203.788504042093 | 212.250918463598 | 138.765621737736 |
|       | 344.887504955742 | 166.317689650501 | 177.845412804098 | 93.461049073831  |
|       | 126.571350683611 | 147.300356318739 | 145.391705645319 | 147.579873410455 |
| SNX6  | 109.415404315559 | 102.282066142307 | 117.355761277966 | 132.205423909251 |
|       | 114.78317743597  | 134.489077146096 | 115.468303687641 | 82.5607312771183 |
|       | 108.976748006885 | 171.238235624104 | 122.588326913328 | 109.943883439481 |
| SNX7  | 57.9141744971757 | 70.1831787109201 | 85.5135159896819 | 51.949834638817  |
|       | 52.7288095750893 | 73.438931050354  | 69.6693950681855 | 55.8907481937375 |
|       | 94.3537052300317 | 53.8909465631671 | 54.7571007198753 | 80.5478617156852 |
| SNX8  | 143.383133346874 | 90.4512650366645 | 74.4508307047509 | 281.016474354764 |
|       | 104.309778306722 | 85.6038071277319 | 135.540738841602 | 138.910687241655 |
|       | 121.562769658314 | 63.0119737420787 | 67.2575005672188 | 47.2131144508464 |
| SNX9  | 36.1232327599945 | 35.3307157989724 | 41.6079958749402 | 39.9697332660833 |
|       | 36.3390947880186 | 37.9951997351435 | 41.8315602975157 | 42.5435283762933 |
|       | 37.0126425326534 | 37.1275334308172 | 40.1742127891824 | 38.0452862258803 |
| SOAT1 | 53.1309801459151 | 56.0477607422828 | 43.0016969050339 | 60.7741670229412 |
|       | 40.4639532172338 | 51.3886035574416 | 47.1345949868029 | 50.3082459161777 |
|       | 50.2223403889892 | 39.0648733099061 | 53.0798381965427 | 43.3744503319109 |
| SOAT2 | 40.8681871019812 | 42.6939394537076 | 41.1367478979484 | 41.6045220683604 |
|       | 39.1087466732192 | 36.4434672195785 | 45.6042625176633 | 40.4639532172338 |
|       | 38.9496515344837 | 44.571915452417  | 38.8173773425835 | 36.6271061451613 |
| SOBP  | 46.9343524312293 | 42.0709558258414 | 41.2747736315207 | 39.3750969348308 |
|       | 42.3550738181144 | 81.2992152187529 | 41.323023670277  | 65.1637149462661 |
|       | 43.0930293831497 | 71.0340758556049 | 61.8061006855512 | 67.5709261701192 |
| SOCS1 | 56.3471340054074 | 63.8399092891728 | 76.9373289454707 | 173.925818790068 |
|       | 50.2163892855092 | 90.2790229242453 | 65.8986841086198 | 91.8568043052819 |
|       | 51.2776048338    | 54.6089451252049 | 67.5417980425932 | 46.4499258373233 |
| SOCS2 | 77.7140342228764 | 250.799060762208 | 108.263706890599 | 160.973602503707 |
|       | 118.57174795047  | 372.525928228911 | 197.608255265624 | 250.176074707634 |
|       | 124.002268940785 | 146.117756310709 | 131.496769528338 | 142.880684604126 |
| SOCS3 | 70.7238101239421 | 77.6653462778309 | 52.5799250974039 | 344.737170118121 |
|       | 58.3564461855595 | 361.632211543977 | 107.836867810972 | 96.0654949568324 |
|       | 89.3342384381684 | 43.8943892311541 | 44.553780984244  | 82.6157566292355 |
| SOCS4 | 70.2541961995753 | 81.9504925867759 | 73.3725472767369 | 76.153346954349  |
|       | 76.2478685333968 | 85.6964911093755 | 64.1442136854628 | 70.7003843117511 |
|       | 78.649592956584  | 68.009873198833  | 61.2153068100932 | 75.854888525664  |
| SOCS5 | 52.4518619184838 | 44.6326024947063 | 46.0727230219512 | 45.9345289922859 |
|       | 45.0693869004277 | 55.9927099883616 | 47.4439407315335 | 45.3872406432794 |
|       | 48.1662933382789 | 52.0329620305531 | 48.8498920654433 | 49.3087627580849 |

SOCS6 35.7012997405508 46.8236022402545 35.3649449469275 41.0726336841311  
 41.7929491793697 44.8872784170036 39.7576136507593 41.9315419791594  
 38.3418933808844 37.920964499903 44.7926323492519 39.2469742642337  
 SOCS7 39.5676051939342 43.5182502375207 39.3709357615493 41.6045220683604  
 39.3999056968598 38.861780967827 42.1157692936428 42.0847226073592  
 44.0519245668737 37.0740019672788 42.5426057453993 37.7315666632629  
 SOD1 1357.41745370754 1554.42895572029 2032.18819581205 1149.90692951795  
 2357.96534075689 2201.39729904166 2712.36664370642 1783.87583818834  
 2640.06306087033 1591.51486001004 1559.50766982801 1921.48678333837  
 SOD2 351.883708151967 180.029671376384 293.649670545233 4344.25847766877  
 248.963785838427 418.410951118141 774.305773140618 305.119894105297  
 96.3563214065014 74.6277165793069 77.7714622826402 186.724171695644  
 SOD3 131.645714321903 64.2174369755376 43.7630587657205 94.4501786945034  
 42.3685136297603 189.984886903595 42.357910063876 52.7787010032051  
 42.5406888281114 213.162949250252 180.398903465014 81.4881766238989  
 SOHLH1 31.8228237796461 43.4396866157171 38.3166554965434  
 39.5050383901884 31.3142073726046 44.0804700754786 38.4005795891396  
 37.5511560880902 38.9834959368496 36.5806287103157 38.3684202018524  
 36.8690774823319  
 SOHLH2 41.5689645295284 42.810624012519 46.7058093820839  
 37.4223289687135 47.8075998240396 48.5136862664526 42.6913548400127  
 53.7378346199838 40.6479758696144 45.0864985243943 41.4860822396574  
 47.6938628797168  
 SOLH 66.7759319948677 72.7987593815919 72.7987593815919 58.1798515131249  
 74.0735632658567 56.2736599756843 77.2154078285418 60.9009676344258  
 61.3733228199803 59.4969799685856 67.6271456814495 61.2108152457954  
 SON 129.613152757362 209.551557135809 243.672418126374 177.494605794577  
 270.394857925086 156.259762538052 146.594288395595 137.10896135739  
 177.133999361532 150.31039735991 165.496075703734 174.252441615373  
 SORBS1 54.9796412320083 46.7871293903346 47.5309279774832  
 42.996134130361 46.5759625882541 535.585999498708 43.3763811343221  
 49.452985143568 43.1805016690297 251.4927207704 218.727705098677  
 408.739953606815  
 SORBS2 55.4319891210513 47.3820775877441 50.942275206135  
 58.8559455338355 75.8976034525022 268.309382865636 67.235655687817  
 62.928986708012 65.8959431201418 199.687268345276 175.60601369033  
 262.153247969144  
 SORBS3 101.403739410832 60.6319889955008 62.1448806673973  
 64.2130157241811 59.1496467460507 113.46454061183 83.5742879296932  
 67.2022549641647 57.1863195337055 85.4420599474339 98.0023132593711  
 76.9303701148105  
 SORCS1 39.7576136507593 39.3681232503406 40.5734458834617  
 41.9635525160083 46.144656267199 45.2421183842044 42.7431359850339  
 42.6975474602554 39.2809305246091 58.4435847520801 59.1002829627368  
 42.7303139017786  
 SORCS2 44.1294459089314 47.3536182445315 43.4709415392696  
 40.3180310664156 43.3332476888305 58.0095518210499 42.629412460409  
 45.3872406432794 39.3750969348308 48.6124127998952 40.1742127891824  
 42.8864415494484  
 SORCS3 40.0988483617359 42.1607322031054 37.9482157381008  
 40.6892234267786 39.859345745831 43.2312848495114 41.253645578517  
 41.6466169548846 41.2424637338424 42.3413611855132 39.9899430628542  
 40.4261913313642



|         |                  |                  |                  |                  |
|---------|------------------|------------------|------------------|------------------|
| SORD    | 59.9232969481163 | 77.9287386697519 | 62.2150049214174 | 51.1169368198437 |
|         | 89.737418965763  | 50.7053783448319 | 76.0975301977715 | 72.8167175634793 |
|         | 53.6057809398787 | 50.4882744710823 | 50.628152951493  | 68.1209771323232 |
| SORL1   | 113.113062709739 | 456.992521713593 | 215.645475520124 | 287.423909789368 |
|         | 113.612874206329 | 114.389392280707 | 202.01900875263  | 269.546586017659 |
|         | 219.103786570566 | 602.726022292973 | 575.863848923457 | 613.740813446728 |
| SORT1   | 276.029709051798 | 189.984886903595 | 175.798140574991 | 198.951182954651 |
|         | 166.168385855406 | 237.532800487032 | 194.862177434028 | 175.099998331811 |
|         | 223.88063506365  | 218.531478946522 | 209.31241212773  | 323.906340044066 |
| SOS1    | 58.8224410806741 | 67.4018925617901 | 68.6095266659765 | 63.6334154351075 |
|         | 65.1757400078647 | 64.0985088513857 | 83.8811735017279 | 62.7950861902067 |
|         | 57.404059248727  | 57.9713749600418 | 53.8856501960117 | 62.5447504571181 |
| SOS2    | 53.6741873729867 | 52.1967540852276 | 64.8254097948745 | 54.8412943008635 |
|         | 46.5557478175976 | 58.0910843932181 | 56.7780520416533 | 46.3685439301234 |
|         | 55.5751438859404 | 52.5522545249206 | 59.2643906275025 | 59.5080588072694 |
| SOST    | 46.441301934328  | 37.0390589468421 | 39.7411455670172 | 37.4642807402741 |
|         | 40.3452320167286 | 40.3357777530419 | 35.6056062164318 | 38.3166554965434 |
|         | 42.4540072551568 | 41.0608773166058 | 40.2317542073211 | 38.9834959368496 |
| SOSTDC1 | 51.7607563002005 | 51.524711857679  | 45.1569741609597 |                  |
|         | 45.7397504535169 | 47.5647821785529 | 53.2046867327331 | 37.3799542961839 |
|         | 41.2551966132486 | 55.4030910454028 | 65.5349012839562 | 76.6232527679845 |
|         | 46.2625470410195 |                  |                  |                  |
| SOX1    | 33.4902421268456 | 33.3069622728735 | 35.8265993915844 | 40.1804147506786 |
|         | 35.9058393060637 | 38.2293008890613 | 36.634024014558  | 37.6557714476853 |
|         | 32.7294532998931 | 35.4990901121893 | 39.9070785037411 | 30.3383368296776 |
| SOX10   | 38.6454098044474 | 41.9894412416874 | 36.9795961564828 | 47.0874209746031 |
|         | 38.5512429290626 | 55.9351706773613 | 53.4921736109774 | 39.4710743516517 |
|         | 38.8271346375425 | 44.6918600441328 | 36.6298807161755 | 41.3481355128089 |
| SOX11   | 53.5643281930979 | 47.4740726032707 | 41.8751578329365 | 38.042028333747  |
|         | 38.2083710281545 | 37.842873463785  | 40.8681871019812 | 180.222765336208 |
|         | 39.9444191873552 | 34.7848206025882 | 39.5792604499113 | 34.4570158133896 |
| SOX12   | 51.5888395924843 | 48.3077814647455 | 47.646800205189  | 43.6726153508978 |
|         | 48.9627346956003 | 50.4022543872993 | 47.2927436772465 | 45.1714698794331 |
|         | 50.6750785584772 | 41.7405682794166 | 44.1148826235374 | 46.1592873342534 |
| SOX13   | 204.659954879641 | 172.206923437536 | 192.112101000423 | 73.3725472767369 |
|         | 162.151812425949 | 152.17335005192  | 158.321459945365 | 89.5130163419167 |
|         | 166.648551193168 | 158.769954040462 | 180.844663304872 | 145.936763882526 |
| SOX14   | 42.9104454767916 | 52.4351670989268 | 45.6989664108554 | 44.6905691366696 |
|         | 43.7517118200398 | 41.3553369544097 | 37.1643693306382 | 46.695848687694  |
|         | 54.2825877218965 | 43.1839109702714 | 41.2598458726002 | 51.0013344286851 |
| SOX15   | 59.5000730792772 | 57.2871072823547 | 475.008345432596 | 46.3203995372658 |
|         | 51.1368583672022 | 184.701183332784 | 56.6537562775715 | 67.3976855661302 |
|         | 94.9831937714438 | 393.337170271481 | 268.38649000825  | 545.827286197333 |
| SOX17   | 54.4384603094793 | 63.5932443357808 | 73.1262465119304 | 76.0975301977715 |
|         | 51.7983110178095 | 221.743315748689 | 41.253645578517  | 59.0262390168156 |
|         | 41.6616444147804 | 52.5522545249206 | 64.0541263553251 | 50.7487159427973 |
| SOX18   | 221.598637828404 | 549.117045813593 | 568.905368101326 | 381.533380474563 |
|         | 261.326713935356 | 249.148159759128 | 61.8571521441451 | 145.335751135441 |
|         | 89.6115806694241 | 159.844078593375 | 368.318359434313 | 174.443102016472 |
| SOX2    | 57.2960245538881 | 50.0642388903563 | 42.0621425894624 | 41.7614975630362 |
|         | 47.27543600687   | 40.4359177791566 | 54.339958888486  | 42.6022652963326 |
|         | 140.369714831352 | 41.4659679379482 | 42.6776449468246 | 42.8864415494484 |

|        |                  |                  |                  |                  |
|--------|------------------|------------------|------------------|------------------|
| SOX21  | 72.4966502412724 | 134.646159826262 | 267.85990321012  | 47.8164193292842 |
|        | 49.9493230064613 | 44.8872784170036 | 54.1707158323527 | 43.0390857698452 |
|        | 550.100918659768 | 40.5090849993014 | 45.1432412071268 | 40.2669497398702 |
| SOX3   | 36.8072833828297 | 44.1239711172417 | 39.0775870687758 | 38.0958223740111 |
|        | 39.9697332660833 | 38.2293008890613 | 38.8417151851134 | 39.0620487644635 |
|        | 32.6039814489621 | 42.4594149893798 | 40.8225507267584 | 37.5556299264699 |
| SOX30  | 39.1590964332473 | 43.683792219729  | 37.7963032976457 | 39.6292788039793 |
|        | 43.004943518025  | 39.3841861812262 | 44.5390641547628 | 44.8997235283254 |
|        | 39.3750969348308 | 40.3235655331796 | 42.2510526338368 | 39.7411455670172 |
| SOX4   | 515.007705025879 | 212.530138323284 | 94.6130003107132 | 91.9185612536409 |
|        | 258.757703729905 | 96.6294773538052 | 318.369837408344 | 401.679080975109 |
|        | 269.618616631857 | 120.274848052394 | 82.7309298534989 | 118.966448789057 |
| SOX5   | 41.1914475733743 | 39.9339434067497 | 37.9946685306274 | 38.745552403895  |
|        | 39.9042726867255 | 40.5281496800812 | 41.0995198212729 | 35.2642250366721 |
|        | 41.4417765092034 | 37.6617024361839 | 40.2304590200469 | 39.3575468494941 |
| SOX6   | 40.4310982248029 | 40.3104838541906 | 39.8676052969935 | 39.7411455670172 |
|        | 37.4937394063612 | 39.6789412274485 | 38.4456289125816 | 40.2798627005118 |
|        | 38.0213051227859 | 39.3999056968598 | 36.1779002669807 | 39.6974743030823 |
| SOX7   | 43.4100411978366 | 46.7279104095328 | 58.5212649095879 | 49.9672547361866 |
|        | 62.3233491851723 | 62.9688525319822 | 41.253645578517  | 62.2354226918761 |
|        | 53.9287524861617 | 53.6788556779989 | 53.5966673719267 | 60.3093790894864 |
| SOX8   | 80.0866955521632 | 60.9311907846259 | 56.3471340054074 | 43.6726153508978 |
|        | 82.6157566292355 | 63.3612993417558 | 40.6750540874299 | 50.1833483241864 |
|        | 42.0621425894624 | 54.0374522273907 | 47.6884372645373 | 48.9733758107788 |
| SOX9   | 166.399121350223 | 42.5269793679335 | 42.157627240486  | 42.2496337895968 |
|        | 60.0736861987141 | 58.4435847520801 | 143.042664581646 | 129.456543260731 |
|        | 104.80882886573  | 45.5776159432079 | 55.1804535845496 | 53.0446815750355 |
| SP1    | 167.430013807712 | 166.752205770965 | 176.27162536342  | 165.311139930529 |
|        | 153.405734390061 | 158.156217755244 | 166.910579215196 | 206.559526386642 |
|        | 282.840679491909 | 195.790389809892 | 165.160683489444 | 220.192552354287 |
| SP100  | 69.1931891474114 | 75.0426778826847 | 74.9113162056974 | 102.085154509866 |
|        | 47.2740099216972 | 63.5195937348531 | 54.2356999525029 | 63.6476735543021 |
|        | 63.5489745357606 | 64.8549209064366 | 62.275808835675  | 65.3585701203568 |
| SP110  | 87.7337304906377 | 169.031144318639 | 193.569399061809 | 341.078728185917 |
|        | 60.8899937371383 | 148.027258506301 | 99.9057667432209 | 141.319488024794 |
|        | 91.0526311350893 | 105.914573205761 | 119.621934826916 | 104.398842509776 |
| SP140  | 47.3199610467754 | 54.9194306828726 | 74.0204513459504 | 124.611407530723 |
|        | 40.0230205296014 | 43.9724628401189 | 49.452985143568  | 52.407151732257  |
|        | 45.1899271235974 | 40.2669497398702 | 41.9455842688118 | 43.0456011922275 |
| SP140L | 74.0913177754682 | 70.8546350449171 | 67.6373573669424 |                  |
|        | 72.2577390063259 | 56.9360840563854 | 55.8243694410835 | 59.9792284253187 |
|        | 51.9447450229707 | 90.2790229242453 | 52.0999467564713 | 73.9126724639466 |
|        | 70.6903168772326 |                  |                  |                  |
| SP2    | 139.712472369259 | 190.854807132673 | 113.82565808481  | 153.711194034581 |
|        | 136.272019225585 | 120.980558571109 | 154.718907273467 | 99.7445419301229 |
|        | 156.65747550889  | 118.410983614453 | 142.417106615034 | 91.0346886951891 |
| SP3    | 70.1831787109201 | 59.2643906275025 | 69.0503036666628 | 75.6614221167993 |
|        | 65.4643755537228 | 86.0630164348952 | 68.2708120569221 | 66.211494935811  |
|        | 70.3935694362568 | 70.5534237141767 | 73.671816307517  | 82.5312123120641 |
| SP4    | 50.9895771651972 | 47.1856919329105 | 53.6837370963602 | 58.7338159410728 |
|        | 43.8835874380262 | 52.5799250974039 | 37.8877750141557 | 47.5950227477807 |
|        | 50.0303076717704 | 56.7482794147852 | 59.4188882103773 | 57.3257175460048 |

SP5 84.3850767822327 49.1283590719461 46.2625470410195 60.7741670229412  
52.5645416722441 56.2736599756843 58.2315917325629 63.1604223919703  
54.4059109100338 64.9959712888709 66.737740728688 57.290967307936  
SP6 58.5759178381027 48.7847528954724 69.9179689232341 40.3180310664156  
43.7517118200398 36.8059561571675 46.8613212048981 61.016921238986  
47.1744296124496 69.0530953932111 57.2008272301399 48.8670821164567  
SP7 40.4639532172338 35.9305494063137 44.3344900481112 40.4359177791566  
37.7576900881741 39.4953494583071 33.5578650644246 35.9023742468744  
37.6383530120621 38.528621456378 42.2618615571566 42.4607795638552  
SP8 44.3355304829989 41.8559558586378 45.063792968927 44.0895090772372  
44.0060504971009 39.1650142708257 45.6782637989541 41.3506832276112  
45.6162785059562 42.4301183791899 42.668311948721 42.5294887665766  
SPA17 69.9431447778061 83.9760574088975 97.7620313090597 69.6511571901941  
74.3523005665671 53.3185097662527 82.6381941930783 69.9709625205629  
82.5344501505114 52.8928296360463 67.7280831060202 101.699631771662  
SPACA1 44.6231541342 46.0713306971594 41.1367478979484  
41.1886975241176 47.6884372645373 48.7781962164988 48.0283573444179  
41.0381860307445 44.1519466943185 48.8623729374733 40.9157352260901  
41.7575097298927  
SPACA3 47.1962846565261 39.8695929627783 38.8775560911841  
60.4646208319121 42.4864576619427 42.6575535390785 39.0458123429605  
40.2382908228517 45.1899271235974 43.0919221375514 38.745552403895  
39.0536056496869  
SPACA4 39.6609238036815 40.6380495994768 41.8751578329365  
41.4273122914951 39.6535880152834 42.4580504587581 46.9929836306816  
40.047314525032 41.2870505273664 40.8970401536578 45.8180710486329  
41.9430737035925  
SPACA5 38.6454098044474 41.8848959280916 40.4070046183108  
41.4273122914951 36.8059561571675 43.8582747295766 41.706879587091  
40.931294690669 44.2607789091176 43.6033221838149 42.2618615571566  
37.7526485343328  
SPACA5B 38.7537364570873 40.8880530359822 39.044540595942  
41.7144525110048 42.8510579683751 41.3553369544097 37.7598032934773  
44.4031868028216 42.9413736814915 41.0057887014368 39.5792604499113  
43.1805016690297  
SPAG1 52.2236479204029 68.8434927019554 53.838484549134 41.948762493127  
61.8701572127817 45.4607426241257 74.8270640933572 52.0182867169197  
68.2975137482252 46.2768056702424 54.4825201506931 47.0874209746031  
SPAG11A 54.0170817319522 44.1239711172417 44.8872784170036  
53.3967242431461 37.3508690072156 43.3785777889265 48.1747307200218  
45.9604707098953 45.0017158586743 51.4454142248566 46.824299585607  
42.57175366709  
SPAG11B 45.1479346191482 42.140045812061 39.2707964550441  
43.26160898693 41.948762493127 41.9946838598688 42.1308615354951  
37.6126279002007 40.6451121071568 42.6211340086915 39.9519547348106  
42.1537476443423  
SPAG16 54.2931724501801 75.164719839017 76.2193772627406  
44.3425264236664 62.4530276414691 61.8187341713197 62.8635815439291  
45.1714698794331 73.6323065529916 63.0670482657086 62.7377155597666  
78.4428909886495  
SPAG17 42.2455707947223 54.5374188496807 49.1067959632109  
42.8235313007746 41.1868052124344 42.5660695551615 43.0930293831497  
44.2159020605784 50.6750785584772 46.0119912782855 42.0750889188255  
36.5474283500601

SPAG4 101.935321521672 81.3696465421645 87.8724689898823 156.276838862671  
67.1278109419819 43.0860383229288 167.724518368713 104.232196493024  
274.731304343034 55.6069214673486 59.2643906275025 59.5875857071693  
SPAG4L 50.5670783769975 45.7979032939211 45.2313723727673  
49.7350276169552 46.4343327861696 46.8954576545929 48.8319884367456  
47.7889447429963 45.0017158586743 48.8623729374733 42.170702295259  
48.0350549043063  
SPAG5 59.987045425047 55.5294887653184 53.6837370963602 57.6511495792664  
75.7464604972652 48.4758590019384 77.2154078285418 92.4953883194488  
69.2001494999588 43.6033221838149 44.2925355984056 50.1579724208315  
SPAG6 40.308802735799 40.931294690669 40.244271403831 40.9085497163517  
36.2691013181987 39.5581166303303 43.8835874380262 41.0381860307445  
40.7460990419215 38.6835649080278 37.8710943171479 40.5235471987417  
SPAG7 214.342804055754 198.288493088076 233.07404514708 228.328635242684  
140.976643799742 264.116434279258 227.361044585582 133.211237782894  
130.716532316693 228.21982974423 239.466489599238 199.264520680174  
SPAG8 40.6994262313917 45.0905928998779 38.7745734037492 43.6275678329783  
42.8414096678708 43.6375772743725 36.8369172900902 40.6171774724171  
40.8970401536578 42.6793753550854 44.7926323492519 35.2448979801094  
SPAG9 100.765131355505 110.125787064192 107.337113678019 248.321641540666  
97.8052968915826 131.955454394903 109.758297200083 147.34358398245  
141.924244643825 96.6229910268368 106.590506599473 130.293915348934  
SPAM1 42.5193208629123 40.6380495994768 45.8844325913247 45.7397504535169  
43.5836473788312 42.357910063876 41.3594868055879 39.853866204927  
38.7571208777225 41.3641352453779 41.1638563416981 39.7411455670172  
SPANXA1 73.6362523983338 42.3550738181144 41.3366779545815  
42.5193208629123 37.293529903672 41.809704036355 40.4967168818294  
40.831207953647 43.7630587657205 37.5597671487621 41.5685493982342  
38.5279745308203  
SPANXA2 186.724171695644 40.8880530359822 44.696023817801  
33.1817617228171 41.3755760434934 41.3553369544097 39.3585350448719  
44.293922970134 42.1594905198929 39.6719190054379 40.9157352260901  
44.6484005362281  
SPANXB1 73.3533274030352 36.4002279956519 42.640829914102  
39.9084621723809 41.7419877611072 40.8091178323174 41.1507980856436  
44.1311654985682 44.7058233759912 41.0057887014368 41.134180463103  
41.6550823405646  
SPANXB2 138.82907142482 42.3550738181144 38.6727842796202  
42.9358255168086 39.0564222526273 44.9896851005259 41.3594868055879  
39.6474008369935 41.7627910693483 37.5343260962758 41.1638563416981  
39.9519547348106  
SPANXC 60.7371790125714 36.3110701990588 36.2683886571585  
39.1706564265495 32.2133093774284 31.1150868775826 35.7055410599146  
33.6816578730693 39.0775870687758 37.5343260962758 36.3390947880186  
42.7782216342806  
SPANXE 383.853296408061 42.281606728072 43.4709415392696  
42.0605906240248 41.9842695818285 41.8613406887824 41.0995198212729  
43.0944129868777 41.2437378488025 39.6719190054379 42.337073256895  
41.3012916486748  
SPANXN1 39.6609238036815 40.0527893189096 38.1421709520616  
42.2496337895968 40.4639532172338 45.8325181856483 41.706879587091  
37.9837233601316 38.3418933808844 42.9866214102525 38.5668610487033  
44.1452943804044

SPANXN2 39.9697332660833 41.159706131351 40.8420925848403  
40.5484717678957 40.7779767565889 41.2567470068038 44.7255207589606  
47.3791873993182 37.6383530120621 37.3179578037963 36.3390947880186  
39.9519547348106

SPANXN3 36.8072833828297 32.2133093774284 34.3633615460307  
36.4564050256915 33.7494761745342 38.7340969861754 32.9962272670005  
34.6977013306396 35.0305278582179 38.1042454705119 36.43924066428  
40.8681871019812

SPANXN4 40.148780650831 38.1312950900467 35.2838283525874  
41.0726336841311 36.7356360093603 39.132725377815 35.9058393060637  
35.5798430594271 36.2733735494625 36.4651112441576 36.131485826118  
37.2810767789306

SPANXN5 37.2474303302343 35.2143190355414 41.2365089689635  
38.2041059863839 41.467005949568 36.8059561571675 38.6243997507646  
39.4710743516517 37.1820543575123 39.2623423164488 35.2339574411711  
41.4508241771315

SPARC 2712.36664370642 768.888528247493 829.152040996817 945.065986430527  
572.667024472672 1537.76265834076 81.3082994649699 442.380936516984  
135.080816177012 1180.7204565402 647.868022835702 747.577738135496

SPARCL1 646.791777335656 360.342857415756 502.435496018532  
612.441960343995 390.834121304799 4328.723715755 116.17887995398  
324.936044300546 72.4220552950926 1566.12726152736 1876.51621222292  
2424.0414102425

SPAST 71.5069114573588 62.9165938167938 63.2779399027463 73.5025309968566  
59.4236178078244 55.7964892688242 74.3523005665671 71.5062409407193  
72.7502212566295 68.5888253504788 66.3026572113793 62.436851776671

SPATA1 46.8954576545929 43.0971787292711 43.401782064778  
33.4240466670776 42.4864576619427 41.4508241771315 50.6774883370457  
38.8495095797881 37.8319142847141 31.4813677993933 38.3684202018524  
39.3575468494941

SPATA12 40.6559419616644 45.0905928998779 38.6727842796202  
48.665578118898 45.2556760873335 44.9896851005259 41.0381860307445  
40.047314525032 41.5635499110307 40.8970401536578 39.153226699662  
39.2469742642337

SPATA13 46.3390850717989 43.2649781354792 44.5134109184888  
82.0292880742189 46.7508829977587 46.6872654833579 54.8074655158941  
46.5717043290731 41.9635525160083 43.0919221375514 43.6629145624937  
46.3411353377615

SPATA16 43.4626049853157 35.4484652445078 37.5597671487621  
44.9370339275041 36.7356360093603 39.7394181011603 40.1235656101329  
43.6434576713809 42.0621425894624 41.1222709786153 36.8282383070068  
39.2469742642337

SPATA17 37.8386378737561 41.4508241771315 46.5650556481721  
36.890925044696 38.8456942580061 43.7630587657205 47.5963750520409  
40.5158867964016 45.5779686360641 41.3321861371202 37.1059647239814  
39.9519547348106

SPATA18 56.8168526942685 53.0383634135393 88.8240693967573  
58.1798515131249 51.2525124735102 78.9521593412581 45.1017494688414  
46.0633179231318 52.4539007817929 86.2118355769367 76.5505585423421  
69.1099722732115

SPATA19 48.0201377454632 43.8495248991589 37.3687900733549  
37.7469621225553 37.4470183315826 36.8059561571675 39.2533668167483  
46.5717043290731 36.0741672064298 40.8049408996274 39.9070785037411  
41.6550823405646

SPATA2 65.6556779936059 67.6169355376864 74.6901522573522  
44.4367387274922 53.4109882045447 56.6172748471831 60.0981687048269  
60.419911425109 67.646351770712 64.8549209064366 67.8570354010492  
64.531467526747

SPATA20 301.457545514208 461.83420090894 409.724772942357  
227.474113475825 322.029568204596 202.957014793417 93.5928272702304  
169.790843803064 256.258779434769 267.657143781939 306.746364062777  
232.019748665806

SPATA21 37.6397652536077 44.9370339275041 34.6977013306396  
42.357910063876 38.8456942580061 47.2927436772465 38.1793598983615  
40.1474543172332 39.2809305246091 39.5637454855233 35.860430241131  
42.4607795638552

SPATA22 42.6036491382658 46.8954576545929 39.9101908547397  
53.0284011078097 41.467005949568 44.2607789091176 43.6753843488695  
39.9576138799997 42.992884918158 49.3000844711116 44.2925355984056  
41.3481355128089

SPATA2L 89.4747568145717 110.88526946931 115.840734064724  
109.310200749289 86.6854406823303 73.9456720099807 104.341160312305  
94.9654919877791 100.076931518374 59.9354531144375 63.0043412964216  
63.0266170942566

SPATA3 41.9918605927928 39.4629815741023 42.9641759692926  
43.074472921841 41.3387790895716 42.2114134935898 40.2601451506332  
36.489383074099 39.2809305246091 42.02667925031 39.5792604499113  
39.3575468494941

SPATA4 46.0023068797812 43.0971787292711 46.5650556481721  
47.8164193292842 47.6884372645373 47.0027453663546 45.3597029614942  
42.2577689927563 47.0804681460898 43.1839109702714 45.4799270968969  
45.2783024981315

SPATA5 36.964636535049 42.2577689927563 42.785429206422  
45.3882138838137 46.1513019317765 44.9370339275041 44.2166118829877  
44.6511073781104 44.3440839686558 42.3606390470387 42.8742421276144  
43.3262148375525

SPATA5L1 220.682149473323 159.99819920335 134.447479156221  
108.660169650259 225.827961496781 108.589036223189 211.669885749793  
176.653849515825 168.655833116537 123.608921653229 114.389392280707  
132.188774889597

SPATA6 47.2862299990938 48.7847528954724 47.0055981216687  
45.8844325913247 41.8806343997257 50.6360662655392 53.3111230705754  
53.838484549134 44.8997235283254 56.1912096308988 53.8260140375214  
56.6888826857797

SPATA7 63.7226299242322 54.6793272901524 72.3757385026596  
53.3094843669564 58.3675164086197 70.380703483689 56.8373628733077  
49.6534108863792 63.8213322243537 78.5141640924736 66.274247400793  
73.3479915711031

SPATA8 42.9104454767916 47.087835967892 46.8267540220952  
51.0175677516029 46.9906120932727 41.554942319225 53.8687221233237  
50.3972033014227 43.3744503319109 45.6868589181768 47.5439485437351  
42.6758568421347

SPATA9 38.1713217245067 38.2263227947189 41.1367478979484  
42.0621425894624 34.8510844670321 38.7578265341627 40.0603121770344  
39.3113207075992 39.3506426665347 40.848280311228 37.5583886316038  
39.9941474864076

SPATC1 38.932557955217 42.281606728072 39.1433524273815  
39.9182914210537 40.2062851265091 39.972557283863 36.8930008925784

38.7023886970298 38.4866431306822 37.7497202946736 41.2250007054033  
 45.338588656043  
 SPATS1 37.4554876386402 36.9994058279362 30.7315474127249  
 39.066284740632 35.0181575202066 37.8102105794655 36.4098694708483  
 35.1738399826814 42.6366765186182 32.7876527533679 33.6080693875435  
 36.064718696392  
 SPATS2 58.4139484810943 62.5528124447176 65.1185966859561  
 65.3191216270241 54.9249759425252 59.0686629877982 59.2480093795476  
 86.915098846441 74.280612516205 56.9463858443402 62.6048727240291  
 67.1027125641285  
 SPC24 173.745808259419 98.0023132593711 84.5998418020787 95.1423940686828  
 147.704325041249 54.7083331985678 188.670053901101 320.086549121732  
 139.768680518677 71.9124897002253 52.5154971256566 61.8529316708431  
 SPC25 50.1912176441302 55.5294887653184 57.974826209076 40.7481155008596  
 49.5666074434383 38.8336427948187 76.7483302168542 64.7318794662958  
 59.2566572428546 41.3641352453779 39.9070785037411 44.0246886382298  
 SPCS1 1064.35745220225 2951.88559311416 3385.65959808808 1756.86714809925  
 3941.3269626913 1642.75555340648 1848.50311456636 3244.27810937143  
 3088.44063817936 1019.67015337432 1470.84169670955 1712.55038816005  
 SPCS2 329.120125961774 480.13416648493 406.964801954621 538.427311162325  
 350.584135047249 269.044011137638 403.546366055386 247.966757890598  
 457.860665614779 200.958421322871 207.380865650247 389.026128346842  
 SPCS3 70.7238101239421 104.964345794911 98.6706537801886 128.576322740245  
 117.165519915808 102.607924735378 89.1012752492647 50.7364620410977  
 101.01459505339 52.0999467564713 62.436851776671 111.760213205992  
 SPDEF 89.9580440276828 79.8196996067124 99.6821042055758 42.357910063876  
 48.7288537840562 44.3648993568405 36.197424053556 58.9081750508316  
 116.891649452816 45.5776159432079 37.5583886316038 51.2318935933116  
 SPDYA 39.512606833112 39.2907645923217 37.6363622494002 43.9806719678066  
 39.5595233162192 42.0106197763828 37.9982349369794 39.2114264935239  
 40.6957787921451 37.5343260962758 37.2892641289258 39.9941474864076  
 SPDYC 45.8108990837624 37.3634897565502 43.8495248991589 41.8778873678551  
 39.1650142708257 42.157627240486 43.3262148375525 41.2551966132486  
 40.3316153483289 42.1622837416589 39.9899430628542 47.0130468198828  
 SPECC1 48.5835484742456 39.7835513496873 48.5460684639932  
 47.0874209746031 39.7162631015511 42.0574848021044 41.9741368971524  
 42.2577689927563 42.992884918158 41.7932258301997 40.9683275553869  
 44.7401523707775  
 SPECC1L 625.620497724795 417.201611973051 401.347734852083  
 439.558287621096 382.312820492386 900.517711546397 966.803172864162  
 502.435496018532 445.421601813221 809.577874019028 679.810781641519  
 635.050535522135  
 SPEF1 38.304249186058 38.9338521051669 35.3649449469275 40.646702696033  
 38.9496515344837 40.244271403831 42.1607322031054 38.745552403895  
 39.7537274655115 40.8049408996274 38.1835938174625 44.8372404608604  
 SPEF2 41.4905114972525 35.8227939208521 38.9790184198145 39.9697332660833  
 39.7568367479301 41.0582900711341 41.0381860307445 41.0381860307445  
 38.4866431306822 39.2010256871265 41.400731343457 41.2870505273664  
 SPEG 33.3307770183871 40.5400384479766 31.7645650530049 31.5391275257362  
 33.2021437980841 39.3841861812262 31.4474799869345 39.853866204927  
 42.9020321355927 36.3612409063792 36.8282383070068 38.4330755397458  
 SPEM1 41.2424637338424 38.4330755397458 36.9795961564828 47.9915414951747  
 35.0181575202066 41.7627910693483 39.7576136507593 35.4526946152955  
 39.3750969348308 40.8970401536578 44.6286581923295 44.4475838947656

|        |                  |                  |                  |                  |
|--------|------------------|------------------|------------------|------------------|
| SPEN   | 402.221227674218 | 445.307046237791 | 440.728435508514 | 404.440365771217 |
|        | 585.237875919074 | 342.475405815033 | 478.566247444176 | 580.109585240053 |
|        | 585.054570630252 | 497.290172759099 | 567.393665550133 | 400.506633704584 |
| SPERT  | 51.2851682978581 | 70.9179240997848 | 79.4998723172096 | 58.1798515131249 |
|        | 51.5888395924843 | 40.1428591998404 | 43.3262148375525 | 38.079222289614  |
|        | 52.7512110769042 | 48.4890615340603 | 43.4709415392696 | 42.57175366709   |
| SPESP1 | 45.7356815244513 | 40.4772513262052 | 45.5883690965192 |                  |
|        | 43.4812166409346 | 59.0590113926295 | 46.9515828775339 | 40.9157352260901 |
|        | 44.797320243931  | 72.7934987008399 | 47.4534495228738 | 46.0513515682555 |
|        | 48.1125722136997 |                  |                  |                  |
| SPG11  | 220.337850438943 | 316.660303090646 | 249.002758392739 | 237.974766880957 |
|        | 160.755701876741 | 168.17913316957  | 240.11295387591  | 267.024267633341 |
|        | 224.635749257133 | 337.51861578231  | 317.186419919708 | 421.013324906569 |
| SPG20  | 58.4920021605316 | 58.9910892923962 | 50.5089777244781 | 67.7121534934164 |
|        | 53.9074374788981 | 74.4508307047509 | 69.1414574152997 | 56.8094693588238 |
|        | 56.3441077510744 | 86.7076796107636 | 83.5069968129733 | 83.9873645051122 |
| SPG21  | 99.3344676796884 | 109.525921548011 | 81.7765447802116 | 103.470005076276 |
|        | 143.517244617936 | 97.2316181542823 | 118.966448789057 | 76.9671788424922 |
|        | 85.2364387652201 | 55.2635381074136 | 60.581035231763  | 81.3895045947915 |
| SPG3A  | 69.4501305462809 | 106.951862149262 | 60.5390917151449 | 57.5437445697293 |
|        | 50.2163892855092 | 133.365282773876 | 88.0664425843955 | 73.1045688753569 |
|        | 62.7205631511304 | 83.0316824964745 | 74.9294208313176 | 77.5622369733469 |
| SPG7   | 284.437758089699 | 219.34503297115  | 338.000998124097 | 145.75465017845  |
|        | 231.990562664196 | 138.82907142482  | 279.001128345613 | 203.178221073902 |
|        | 191.182530250155 | 348.65230953701  | 281.016474354764 | 217.065944053174 |
| SPHAR  | 41.9407041937973 | 39.6123051184545 | 44.5134109184888 | 38.8495095797881 |
|        | 48.7288537840562 | 41.4508241771315 | 38.4005795891396 | 40.1474543172332 |
|        | 45.3756389170606 | 49.0841460667818 | 55.3942006156899 | 49.9692385479389 |
| SPHK1  | 173.962344165376 | 51.119812302881  | 54.8133029594319 | 249.704644191338 |
|        | 51.2525124735102 | 56.796621176582  | 52.3242437351389 | 57.3286965007828 |
|        | 65.4784797364469 | 43.401782064778  | 42.8263096141654 | 53.1491634301682 |
| SPHK2  | 204.344278991396 | 902.691776563423 | 249.776078532596 | 261.977107410546 |
|        | 710.831173303701 | 247.547769833089 | 462.762837284748 | 166.734730009916 |
|        | 374.026381773215 | 283.111920665176 | 342.300139006451 | 213.073369426342 |
| SPHKAP | 48.1125722136997 | 38.7344853699576 | 38.4043916290561 |                  |
|        | 42.5664883002833 | 40.4639532172338 | 36.6996187567892 | 40.4359177791566 |
|        | 41.9315419791594 | 39.7537274655115 | 43.1839109702714 | 38.2795150354677 |
|        | 40.2669497398702 |                  |                  |                  |
| SPI1   | 66.4015820814547 | 93.9708162269401 | 71.7624419474395 | 526.146757036152 |
|        | 51.2525124735102 | 80.1665291227124 | 112.805898501551 | 59.5830868881343 |
|        | 46.4861258030402 | 50.0564735608363 | 48.5835484742456 | 50.6141827957642 |
| SPIB   | 39.266565827316  | 47.6229101519945 | 47.2962360458401 | 55.2214187655851 |
|        | 43.4544762830742 | 40.8634043028528 | 37.830876898596  | 41.7419877611072 |
|        | 40.137818555383  | 41.2276963324981 | 43.0971787292711 | 42.9887069977696 |
| SPIC   | 46.0023068797812 | 42.810624012519  | 41.4613628725541 | 41.8291484190524 |
|        | 38.3561682218911 | 37.9430145836712 | 39.0458123429605 | 39.1652965788406 |
|        | 39.2497056720346 | 39.3113207075992 | 40.3452320167286 | 39.5418280570561 |
| SPIN1  | 64.4415447415281 | 69.3525901554637 | 59.6565330440648 | 75.2475238554276 |
|        | 62.4267404482092 | 82.1144251872199 | 58.5087296620514 | 55.6904617926772 |
|        | 52.8502823653368 | 60.399253022569  | 73.7060605978536 | 59.2035499250243 |
| SPIN2A | 41.7397731376692 | 41.3610369241157 | 47.2055133646385 |                  |
|        | 52.1201052574162 | 44.9936360641969 | 42.357910063876  | 44.4639405506967 |
|        | 44.1311654985682 | 42.5406888281114 | 50.8826620053386 | 41.6336636285875 |
|        | 41.863927676552  |                  |                  |                  |



SPIN2B 40.3180310664156 43.9697775048582 45.5883690965192  
39.6609238036815 45.505885458784 44.8142634024197 44.2166118829877  
42.9963672633493 44.2952004276566 38.8267895826008 44.6734266378263  
44.7915315085948  
SPIN3 49.4151347850687 61.3428092991286 80.257554904218 51.5913529948887  
78.5141640924736 65.564930068976 68.2708120569221 67.6082563445866  
67.6983931011126 86.3374157614394 74.0420372528779 88.2604063995148  
SPIN4 72.8120269375546 69.640968387662 80.4060693489113 82.5279746006378  
86.6854406823303 71.0197205018137 129.2860308084 77.2048580540589  
131.766252431636 81.537796828766 75.6883778954949 72.6182747525443  
SPINK1 85.0753342967819 10483.5643876539 3592.44409869527  
803.548811322583 1630.25992078321 379.933650669101 10910.7672404363  
13230.9863405074 4916.82166008511 3602.30252142918 4299.4451139256  
6749.14636741447  
SPINK2 38.0089018744739 41.0678614026819 44.3344900481112  
39.9697332660833 41.5668884168669 36.4986986135769 42.357910063876  
46.0633179231318 43.7630587657205 39.4710743516517 36.8282383070068  
39.7411455670172  
SPINK4 36.8072833828297 42.7775752471711 43.401782064778  
35.6928955245309 39.859345745831 31.9222834447339 36.8369172900902  
65.813547096222 39.9444191873552 91.3941563889513 58.6464918752765  
54.1941919612524  
SPINK5 68.4352167527791 47.4076235350059 49.8344973836834  
40.7481155008596 49.0828761839116 50.7516773099639 56.6537562775715  
57.445796273665 103.349712762251 49.7259371799014 45.0589947942306  
47.1060577218993  
SPINK5L2 42.6036491382658 40.9731067463382 43.0016969050339  
43.1847628331565 45.8051846088552 46.7800033479223 44.3440839686558  
41.8417024632349 44.0519245668737 38.4187686307607 43.7585538437696  
44.3521099857368  
SPINK5L3 47.8249696958403 40.8880530359822 41.0356368374708  
41.5464765641928 40.4639532172338 41.8613406887824 43.9450023643394  
38.745552403895 46.1101825640108 41.4397539024976 42.8263096141654  
46.5650556481721  
SPINK6 39.7162631015511 39.5050383901884 40.8846826807717  
50.4487395010341 41.7929491793697 40.4359177791566 48.9826868640753  
49.5185112777773 40.0403898620771 41.1638563416981 40.4995052849302  
41.6550823405646  
SPINK7 42.7150227340364 47.1332119496722 42.157627240486  
43.4410741327254 43.004943518025 34.3887641786747 40.3302268293707  
39.6474008369935 47.9035532886869 47.7180816682562 43.0016969050339  
45.9693232070002  
SPINK8 52.6960621424156 32.8881500803623 39.5450079747895  
39.5050383901884 37.4470183315826 33.6859433472087 39.8695929627783  
42.4580504587581 52.5772854102326 37.3179578037963 35.3362091871364  
39.0536056496869  
SPINK9 40.9558083259517 39.9697332660833 42.5864346233886  
43.367124590178 46.7058093820839 43.5752393599169 40.4359177791566  
43.9604529016594 44.2607789091176 43.8710182120571 37.5583886316038  
38.3834435509221  
SPINLW1 43.1413768296576 43.387539499126 43.6140455003784  
44.265834798964 40.9950639693255 40.5805725503899 45.6555868940589  
42.9972920449065 43.9104473952446 44.0527419856743 43.8002456102021  
45.5238446102876

SPINT1 210.958578914607 226.767370335792 96.0654949568324  
56.1780366332082 133.64996113791 53.2046867327331 162.735117558467  
184.087380444203 195.836475280084 106.049736669661 114.84900130932  
100.677422836631

SPINT2 8349.59691588869 1698.18614771363 1914.9556343048  
404.051373731802 1769.18069954113 493.322302312578 2045.24530722676  
1239.68399088145 2678.43227619157 884.036280777358 1490.1549980903  
1693.5377672895

SPINT4 41.4508241771315 41.0678614026819 42.2577689927563  
41.4273122914951 40.0599807618105 34.6977013306396 43.3262148375525  
41.3506832276112 41.4636047919453 42.0621425894624 45.7328341667151  
45.4799270968969

SPIRE1 220.192552354287 79.1039287828151 179.522572239758  
253.802852066439 300.299201489787 391.397318564183 172.015856827154  
489.983164420779 259.033660186329 532.35007819883 539.720977763663  
480.523317843042

SPIRE2 115.894467332637 232.113067048781 128.996351661564  
39.5050383901884 92.9747592911324 51.9421032049606 225.559405596065  
198.951182954651 146.87603018486 232.815747390118 163.66696652324  
224.976641879383

SPN 91.7761668960824 59.6359245937831 58.7382738968248 113.905373770586  
53.4921736109774 52.902043370862 75.7342400123505 186.724171695644  
54.998510746958 115.075487821396 123.948705613908 83.8637731385607

SPNS1 224.509915754308 139.022985518859 229.26498093497 284.506664353513  
412.072103136251 162.932479392087 190.960237766104 521.874349042344  
243.763402918148 180.255771684507 233.501069644324 170.527024636624

SPNS3 41.7397731376692 44.2105195734073 40.4882741869718 47.8164193292842  
40.3452320167286 40.9506062495231 38.0598374201407 50.5070012045444  
41.2870505273664 44.4652605017595 39.5399188536544 56.6888826857797

SPO11 42.0847226073592 38.8336427948187 41.5536168238478 40.1804147506786  
42.7475279082279 38.0698669928229 42.4550559210442 44.7470332010482  
44.1519466943185 45.4614234442527 41.2250007054033 42.7205719491357

SPOCD1 69.0975200641705 110.88526946931 114.039396407323  
74.4365426051588 113.298540312696 49.8472708021525 85.8154958329408  
53.3094843669564 159.22638189198 149.933827818309 145.232878862479  
402.221227674218

SPOCK1 567.393665550133 77.0244607682203 62.9313387640547  
159.022432105333 119.291755076832 271.857378677296 42.1607322031054  
103.199200862158 63.7046039657949 532.35007819883 306.533241954966  
643.491217668415

SPOCK2 123.521401665865 351.290929267326 276.399037769005  
464.495132469257 73.5541045639348 59.9174456081704 102.150058925164  
105.822362552251 64.1267046511632 69.2963913574682 100.937651342589  
72.3297091475814

SPOCK3 35.6111578834671 37.920964499903 44.6032218589199  
37.651298468202 40.0599807618105 39.6251842352088 36.3194282084339  
38.6454098044474 37.7384958256497 37.2089297656361 43.5710871617107  
39.9519547348106

SPON1 486.487366153374 112.787082951803 58.5212649095879 204.089652936303  
154.633672616367 491.8684831079 46.7100796279384 228.384073242481  
51.3511088648386 402.49165235168 314.924656469102 325.275883498219

SPON2 105.45765455249 52.1062000766427 48.8941062980393 63.6334154351075  
65.0605897122361 68.839885767937 35.0305278582179 43.3262148375525  
39.4762546236449 61.5635554619635 54.9765783642973 52.3896785600751

SPOP 205.378123452174 192.509049577236 193.043344611355 344.887504955742  
234.359144097839 501.148339791372 257.948490663615 318.846373031568  
198.742148437738 513.421493856716 650.328627263899 405.148979342648  
SPOPL 44.0328992213727 57.6831182451733 45.1569741609597 52.403135056701  
42.9655396732962 55.1987351219665 46.3611042575528 47.8947595316832  
51.8396275386273 49.5265949137207 55.0823430906161 53.3904307221902  
SPP1 5112.4354472796 169.838827072973 308.728126648231 5566.52516420571  
135.323750661937 79.4053001255904 594.611678976716 211.227389226633  
112.830467116678 39.4710743516517 45.8669209716694 71.1894129030602  
SPP2 34.3473914754963 40.9731067463382 38.1421709520616 39.9697332660833  
35.0181575202066 39.0266821712099 32.7676164492555 42.157627240486  
35.9645119596869 40.7063426028871 41.0808257270221 40.1700117452801  
SPPL2A 253.207750345072 352.019218177371 261.929727465462  
569.966632625157 237.401487995882 253.207750345072 332.745139672471  
331.984279378726 346.029336456779 188.13862794196 216.63059645927  
295.917955889194  
SPPL2B 52.5307002738469 52.7847097260565 50.9933795450314  
43.8479689858951 65.5468832395274 46.9613376350744 51.3064929551674  
54.9919060580109 46.3203995372658 47.0055981216687 51.8636455065553  
53.5819170097952  
SPPL3 43.3638918705225 51.119812302881 48.1331309338997 45.1944222548351  
45.4751076037511 41.6590564937735 43.5627649099623 46.2779564481158  
65.2125527940945 61.6670071424359 72.1090339831747 44.7401523707775  
SPR 285.626835802986 79.3971417347713 88.878414939392 63.4531374125233  
181.064239330482 94.2678678253657 104.740168626646 119.243515595981  
173.711189659585 157.518879763075 137.302487233881 178.060342847557  
SPRED1 455.223217772744 314.856937113103 277.731146253511  
413.723725202787 341.666968456707 378.12777235743 144.046404221564  
208.060345754611 257.948490663615 316.373650015333 364.628602969366  
427.363555286404  
SPRED2 100.586064920239 141.808284719109 153.279284223069  
86.9274372004388 191.59357986481 92.6036872789676 79.1432909353319  
87.799979434508 144.281881262975 132.710335836559 134.285947677624  
127.093495914275  
SPRED3 46.4676032484368 40.8420925848403 43.9450023643394  
43.0001432913058 41.3331561144087 43.5286328921307 40.3662560853635  
42.6450179841129 40.6957787921451 40.650742261428 44.9713479185144  
44.9645354363967  
SPRN 45.2421183842044 44.4639405506967 42.1901757067073 41.5464765641928  
46.0493141231657 41.9543948167375 38.977631784251 40.8833572570383  
41.5635499110307 42.785429206422 41.9495387255163 41.863927676552  
SPRR1A 250.244199415895 140.175068871414 757.833254346899  
75.0377156190383 246.433145017965 75.7502062965698 235.047133588022  
608.579654909865 272.930242946726 48.0211752672327 78.5325880060762  
80.6200293361016  
SPRR1B 78.9028182143923 57.2231446406982 124.664792638889  
77.3864518736634 60.5290966885203 55.540888910486 67.5206810636627  
91.2742382717815 73.2144205844199 48.2596564318071 48.2910530887214  
46.1592873342534  
SPRR2A 574.14982128922 61.3838877877366 68.8098607236981  
125.484233748017 43.9450023643394 47.6803619768589 102.499011190932  
40.4359177791566 50.7619345314571 42.8936990772838 42.2618615571566  
37.9607839934735

SPRR2B 47.7267190613906 39.8695929627783 44.5134109184888  
39.9697332660833 37.2567512265363 44.5544727111028 45.8980298854198  
42.7431359850339 44.3440839686558 38.745552403895 40.9157352260901  
38.2350720635382

SPRR2C 213.309547409053 35.9305494063137 35.0970060242246  
41.1886975241176 44.3557408297309 39.132725377815 48.8319884367456  
41.4508241771315 43.4656637536244 37.920964499903 43.3085358214154  
39.8497227447888

SPRR2D 40.5654775358427 52.2832912331043 59.4431489877328  
67.0402749076279 45.7407938943718 39.3565586789274 43.7585538437696  
45.642304356051 41.4636047919453 40.2112371512838 38.1835938174625  
37.9607839934735

SPRR2E 42.442231667357 44.2105195734073 41.6977706798234  
45.2759158146116 42.3685136297603 36.0537855103446 39.9519547348106  
42.7431359850339 43.0456011922275 40.0557788909923 42.6776449468246  
37.0953622406687

SPRR2F 193.468773556057 44.9370339275041 50.6004078448405  
59.4674205670657 44.2607789091176 49.4157684139858 42.8684958525042  
42.2577689927563 43.1805016690297 41.1222709786153 43.5710871617107  
47.1060577218993

SPRR2G 46.0023068797812 52.3896785600751 40.7620472083159  
44.6905691366696 42.269054475455 38.7340969861754 55.4004611309636  
39.853866204927 41.1742244762318 49.8393069675192 43.4709415392696  
45.4799270968969

SPRR3 737.604036996153 606.276674926567 281.357129823238 134.725028732282  
176.506718222092 66.0069448981947 184.421617360366 450.271658272512  
167.799243454967 79.4916415027015 78.1856721173896 52.0359304386476

SPRR4 39.7576136507593 40.0527893189096 39.7411455670172 38.9534635879195  
44.8897737954573 46.7800033479223 41.9393838138203 43.7396619462033  
42.1594905198929 41.2276963324981 37.2892641289258 34.3409660445447

SPRY1 273.032063533642 254.425072964926 335.002151198999 373.330920144642  
350.917244438732 752.837247653926 126.360723656793 269.184000351658  
388.920739791844 381.533380474563 582.017297217368 432.669787408904

SPRY2 98.1495112518979 136.947616119439 93.9472621843566 102.00080367858  
97.1271615802556 196.592478823849 51.9421032049606 122.143519601825  
66.4251023257203 218.999184133546 164.176142753482 136.20629436945

SPRY3 41.9407041937973 46.5650556481721 41.3366779545815 40.1804147506786  
49.32293280121 44.7804080899431 38.8417151851134 39.9576138799997  
44.1519466943185 48.2596564318071 45.9104478407175 39.1553169409075

SPRY4 154.149426842591 117.127994102455 161.817972012879 67.3853554453616  
114.288115730578 61.4121672148248 76.3583555666815 73.4820932957859  
70.2635892414678 59.4309046716701 83.555058970129 64.2164483533411

SPRYD3 188.386331007465 148.63149183467 169.99300253813  
177.985573759136 138.728648830528 288.597205372736 165.411942074375  
243.672418126374 171.021755568144 278.453446231317 222.51183424157  
256.80504454312

SPRYD4 81.1350396749303 74.5654028199926 84.7851173379268  
67.474556589181 100.548557273012 62.0660509811111 88.0664425843955  
83.7019398654324 97.6084681131585 69.8941497035747 67.9599395822006  
73.7335870746827

SPRYD5 46.9939712192224 42.4493032770053 47.5673419710251  
49.5424425850549 42.9090346219023 48.3686935595826 40.9157352260901  
43.7396619462033 48.0163377492228 38.6454098044474 38.956280281655  
49.5539622682049

SPSB1 269.438510636306 119.263603432127 128.89714160809 120.807573842238  
127.760816230317 208.553134986809 120.721482177994 204.171339006867  
215.15351875081 188.647431971957 201.486224052899 184.105396912056  
SPSB2 68.5457752893587 52.2501726671381 84.3755392205436 65.8926843080114  
64.7488184936482 80.2112932898502 79.2701322339022 64.7318794662958  
102.771611905219 91.1057573288203 121.552188287725 65.8959431201418  
SPSB3 415.364456363434 410.808988840343 600.34379987143 357.111253129662  
362.724027984972 269.184000351658 510.525676243746 212.250918463598  
339.210875653066 505.911881145656 511.067537752967 272.257070024902  
SPSB4 34.6977013306396 40.3384318592985 37.8386378737561 37.7469621225553  
38.9496515344837 40.650742261428 42.7431359850339 43.4544762830742  
40.3316153483289 35.0668743708816 38.745552403895 34.9138625012006  
SPTA1 38.0089018744739 52.7493349111555 41.785676764591 41.0726336841311  
40.8873907150245 47.0940613507321 43.4544762830742 35.3608605269276  
42.8036731479932 41.3321861371202 42.7275315121163 40.5703581862752  
SPTAN1 644.733901442573 419.46223841313 341.666968456707  
382.050584680669 226.719775835218 755.852629128252 492.324859107777  
464.352441400358 302.422475486532 690.568858101531 544.355979695242  
435.632247999054  
SPTB 37.8386378737561 40.9298924777825 37.2838080935695 36.7283081422707  
37.7115233202949 41.9543948167375 38.8732216254738 40.047314525032  
38.1713217245067 41.483412492426 39.9070785037411 36.9253036131655  
SPTBN1 198.922575188741 198.729330487352 92.1908585323292  
115.691017747672 107.951009163316 414.539381761279 147.187118389181  
269.284584971871 84.9075858560758 109.994844561228 210.524799041662  
197.011675186182  
SPTBN2 47.4678477186801 49.1283590719461 44.2405728317107  
48.665578118898 47.9128504683618 44.5544727111028 59.6780848951767  
86.0944261788554 46.2027193115397 55.2214187655851 50.2203578628217  
46.0633179231318  
SPTBN4 38.932557955217 43.0227387991135 42.1204847421254  
46.0860140689254 42.8589586745166 44.4619248757502 40.5585676679482  
44.2492967753383 42.5406888281114 41.800198520267 43.7585538437696  
41.5230459979285  
SPTBN5 41.3387790895716 55.4635297192076 75.0377156190383  
43.8002456102021 56.6951078698291 39.3841861812262 55.695361644141  
93.7090094630558 66.5298067946102 119.301672388541 103.316970096472  
74.9294208313176  
SPTLC1 438.681666410245 348.65230953701 314.458148321064  
428.411504354946 314.856937113103 258.789217436101 351.439404852971  
634.514100741768 263.832968124343 498.958550919515 512.951288394692  
439.558287621096  
SPTLC2 86.5564881117807 61.3428092991286 91.6978282652998  
75.0377156190383 64.6374507338031 65.813547096222 67.8919712859031  
71.408876667815 103.139459009593 91.2016867646161 87.6689055777294  
113.624887028422  
SPTLC3 54.3554233228353 93.769294435694 68.1780382173625  
44.4912617551615 78.6911549149983 56.1115976952096 72.4651758215622  
60.1796637353976 56.6303547065929 64.0162246399972 67.6699686085575  
54.8630527326985  
SPTY2D1 57.6285775590145 98.8114094374455 86.9924799927707  
123.608921653229 82.3181867658154 108.08526252608 82.7853677822046  
83.0497574039035 91.0346886951891 53.5498255316009 74.9006142438341  
79.9447969637409

SPZ1 43.7585538437696 45.5842286511645 43.3085358214154 50.2163892855092  
46.1804647841331 37.3799542961839 48.6395795163502 39.5466975353131  
48.5792058061372 45.5776159432079 46.7386599624801 46.4499258373233  
SQLE 291.785618741057 260.656475394736 178.559242961756 162.30238363798  
234.172977976583 82.9995913411894 321.26586939039 172.070926124844  
386.640440174303 71.3900857589616 108.599492114105 121.487591828005  
SQRDL 118.410983614453 104.650071846586 74.2122914028677 220.597255695837  
65.3019328668633 127.265200736376 138.923143963742 129.675613712326  
76.7100878053735 87.5074297754031 84.7058085717914 109.398472684587  
SQSTM1 386.00975855841 338.053116855608 385.675278463448  
528.840700144811 486.044304392285 798.996494242432 489.232537791775  
479.696469083953 833.136660528149 514.076460398785 632.577797921655  
959.549658414082  
SR140 235.127539195661 214.127390534906 282.115786635657 175.798140574991  
379.865108456536 251.4927207704 241.486113826383 246.725921565571  
197.923403667051 138.292681458047 154.355197155161 209.251334289712  
SRA1 48.1125722136997 53.3974326903004 48.7646976789783 59.5370927657967  
43.9994592139885 57.8585041080995 50.0088611244948 53.8909465631671  
51.7833333848627 60.1466326805616 62.436851776671 67.1675878355908  
SRBD1 133.626390404589 134.743068051122 103.545764794149 152.545682001987  
109.017269529278 118.186590679218 130.648278937122 167.25176386043  
112.900479809091 141.087571926258 129.501808300251 110.13638939902  
SRC 261.081844108932 277.204818876581 217.976796656266 148.42234459694  
224.509915754308 143.098268804553 365.401746744015 290.448089141121  
329.04108845799 402.978328664331 321.359569119182 283.30253361072  
SRCAP 43.0930293831497 48.109747794187 45.4865173433646 44.265834798964  
64.3571664944642 46.263826584899 42.2577689927563 53.6210959113222  
40.9901805728485 43.0919221375514 56.8436081694537 38.1421709520616  
SRCRB4D 39.6609238036815 38.0226905622357 38.3166554965434  
40.0698728584484 36.3390947880186 40.7616966228404 40.5585676679482  
43.5544347011646 28.3262844159644 39.8873706855774 37.9230440150891  
38.3291713594599  
SRD5A1 85.4713284900688 62.4530276414691 84.7851173379268  
75.2475238554276 59.0965219753805 53.1052228246467 121.36340610316  
70.0697974278875 94.1050519074545 50.8826620053386 54.4140381300469  
51.0013344286851  
SRD5A2 39.6609238036815 38.5252456306656 37.4642807402741  
36.9912468186322 40.2449343247539 44.3648993568405 41.3594868055879  
44.8997235283254 37.3600014814388 46.6598879466655 81.5678694264684  
53.7442594289333  
SRD5A2L2 39.1590964332473 37.5469247328848 36.1042012504758  
40.7481155008596 34.9062568194127 39.132725377815 39.7576136507593  
36.8400213077707 46.7760357462635 40.4136535208406 40.9157352260901  
37.9607839934735  
SRD5A3 51.9545473262296 63.3667304749164 53.4743535852344  
52.1201052574162 51.1368583672022 52.8421046802739 57.7805922926828  
66.5234828659154 70.8606919488782 35.93950183586 51.5822637582617  
50.5511827666954  
SREBF1 83.9647518349407 119.512426152446 100.494620361408  
87.9098670472958 85.5881739836215 84.0305689846475 88.5907320965949  
81.0766789453664 294.372319595103 79.9447969637409 92.6888475289584  
67.9306669919176  
SREBF2 51.0225132036905 51.524711857679 54.6051538001037  
42.5664883002833 46.3150221024046 57.1752846228778 51.1541843174981

|         |                  |                  |                  |                  |
|---------|------------------|------------------|------------------|------------------|
|         | 46.7980335276155 | 50.5785738734431 | 45.7911932481722 | 52.8489752025797 |
|         | 47.3172462673426 |                  |                  |                  |
| SRF     | 606.481020597082 | 480.660242705293 | 273.705329906513 | 356.503013319738 |
|         | 418.410951118141 | 753.491584605447 | 340.20879802231  | 357.839241226513 |
|         | 293.516547661658 | 518.074074000609 | 477.558242266308 | 607.431621448599 |
| SRFBP1  | 66.7759319948677 | 77.1737254584648 | 84.2385359528743 |                  |
|         | 64.6945454069792 | 78.0077300979911 | 82.9449579428926 | 72.2577390063259 |
|         | 68.9522412475296 | 80.1505160355175 | 50.0564735608363 | 76.5505585423421 |
|         | 82.8275497073451 |                  |                  |                  |
| SRGAP1  | 64.546412747238  | 57.2231446406982 | 111.880226272362 |                  |
|         | 102.605473054584 | 65.6003544901554 | 88.8760662992208 | 91.2330127140591 |
|         | 155.872353189452 | 68.2372031645261 | 103.607345835114 | 112.368910939752 |
|         | 77.6056319020116 |                  |                  |                  |
| SRGAP2  | 54.8074655158941 | 56.032814067931  | 55.1647896765236 |                  |
|         | 49.4659732808421 | 48.5721799977026 | 53.5139000636716 | 63.3315266915127 |
|         | 58.2571968311834 | 58.8559455338355 | 50.3388505346542 | 49.8200626776888 |
|         | 51.6660481331154 |                  |                  |                  |
| SRGAP3  | 52.7817052791259 | 50.8114699212931 | 70.56368853915   |                  |
|         | 51.5913529948887 | 51.5888395924843 | 50.8533737532786 | 62.4624150544853 |
|         | 56.2000979702695 | 68.75304552302   | 210.200786815048 | 150.43149196048  |
|         | 151.225738885272 |                  |                  |                  |
| SRGN    | 390.978292094212 | 435.901460958456 | 543.640122689871 | 7022.41612496714 |
|         | 321.26586939039  | 1259.2978319548  | 1342.10592868516 | 404.86512250958  |
|         | 107.420552630045 | 130.02102880365  | 157.856158440506 | 375.757961593064 |
| SRI     | 65.9703614596867 | 108.928854330744 | 110.88526946931  | 70.5814261430207 |
|         | 96.2739664178142 | 125.735441231594 | 84.1195048659476 | 79.1922819549042 |
|         | 102.020047144427 | 99.9552732785915 | 97.822911929574  | 141.055218279065 |
| SRL     | 42.6036491382658 | 42.1607322031054 | 40.6737160001291 | 48.4916117779992 |
|         | 39.6535880152834 | 52.4351670989268 | 46.8613212048981 | 48.1591264215184 |
|         | 46.9739160257217 | 48.4890615340603 | 46.4753015651202 | 46.6397391251762 |
| SRM     | 249.704644191338 | 348.450810225807 | 232.019748665806 | 234.727123301682 |
|         | 739.541009338849 | 364.628602969366 | 344.985739524681 | 326.357036514613 |
|         | 301.79813401066  | 178.4681248137   | 226.926786963011 | 154.287396750021 |
| SRMS    | 37.9387791625384 | 40.8880530359822 | 40.8420925848403 | 40.8681871019812 |
|         | 42.7982502551634 | 40.9506062495231 | 44.9863726205428 | 37.9837233601316 |
|         | 41.5635499110307 | 39.4710743516517 | 42.911855821602  | 42.357910063876  |
| SRP14   | 2506.05102956991 | 1888.71160604243 | 1689.77066894108 | 1707.92349760322 |
|         | 2164.51925341969 | 2611.32405374107 | 2621.65272077828 | 1868.51164332659 |
|         | 2663.19221471348 | 1275.78715071615 | 1393.24135330226 | 2488.32876359853 |
| SRP14P1 | 682.227514643175 | 629.532332373083 | 410.329983506955 |                  |
|         | 458.351940464467 | 516.848416430243 | 866.712228831149 | 743.463635670141 |
|         | 550.990544834571 | 767.489657259345 | 384.401256392893 | 425.692369974286 |
|         | 757.257495810249 |                  |                  |                  |
| SRP19   | 245.489660195494 | 215.955919625615 | 219.527698657901 | 351.700618429121 |
|         | 190.921576470336 | 271.857378677296 | 217.226686591407 | 248.744491123257 |
|         | 185.360921731157 | 131.779333469955 | 163.360824752796 | 220.938982373755 |
| SRP54   | 280.338993896267 | 321.550107822925 | 319.596352961751 | 389.364650157102 |
|         | 206.234676343851 | 248.438376348617 | 243.843941346211 | 271.813877560354 |
|         | 253.802852066439 | 196.844428284247 | 242.282363793567 | 337.259932087655 |
| SRP68   | 481.145001682177 | 422.474427987338 | 420.401914084346 | 353.598144765197 |
|         | 411.73316510051  | 515.007705025879 | 532.465842165105 | 457.352802877198 |
|         | 524.451156145427 | 569.511773053233 | 471.297503316471 | 446.613670519745 |

|        |                  |                  |                  |                  |
|--------|------------------|------------------|------------------|------------------|
| SRP72  | 99.8231023149756 | 135.436347750159 | 114.224091812993 | 163.844659359002 |
|        | 159.416887501941 | 140.264270771578 | 104.341160312305 | 124.605379715077 |
|        | 120.881290860109 | 108.111248374368 | 96.4278951689874 | 109.339287213971 |
| SRP9   | 601.139894733857 | 1078.86166154061 | 1000.65752290829 | 541.631969808467 |
|        | 952.16345035163  | 717.997180920384 | 1089.08276262641 | 893.185203928127 |
|        | 962.079396754147 | 615.838713743621 | 689.228901128857 | 1000.65752290829 |
| SRPK1  | 317.325808319372 | 369.877521477669 | 403.428042132639 | 202.360546931172 |
|        | 736.078559195579 | 160.853643241489 | 453.260719561292 | 244.070778149931 |
|        | 470.231929311877 | 260.766438659762 | 235.075347885884 | 422.237766234202 |
| SRPK2  | 46.0336705108419 | 66.3558126170575 | 68.4261608261522 | 46.2528333282885 |
|        | 68.1040271620925 | 58.7404123614695 | 51.0889740983457 | 47.5529788356555 |
|        | 59.5752464532208 | 52.5522545249206 | 48.260931742163  | 50.4847465816184 |
| SRPK3  | 40.8681871019812 | 54.0461131287999 | 47.4740726032707 | 43.5627649099623 |
|        | 52.5645416722441 | 87.0685571351947 | 48.0283573444179 | 52.3068458655445 |
|        | 44.0519245668737 | 55.9283039581662 | 64.2174369755376 | 54.293880614303  |
| SRPR   | 209.967057706137 | 302.79352975792  | 287.565588186962 | 294.51382100172  |
|        | 336.490083577377 | 193.981651711507 | 223.970572361745 | 209.038077542654 |
|        | 265.320447667174 | 202.667616796658 | 199.776860110557 | 209.89649461562  |
| SRPRB  | 822.822769402853 | 361.632211543977 | 495.26603220907  | 587.060466667911 |
|        | 942.247437385029 | 480.660242705293 | 421.791344753995 | 677.668455095171 |
|        | 466.935292808402 | 472.159979716705 | 479.507453857294 | 494.162646055732 |
| SRPX   | 206.103296228683 | 66.8693882433359 | 58.637422084759  | 154.019005732316 |
|        | 89.4747568145717 | 1073.84987604662 | 52.561573697155  | 119.670948133232 |
|        | 56.5094373275922 | 410.979796414875 | 621.012072500314 | 454.551748488397 |
| SRPX2  | 318.995164994001 | 282.035361446993 | 190.854807132673 | 145.676955166566 |
|        | 100.645556491457 | 85.9636350040248 | 46.8613212048981 | 110.869341159607 |
|        | 209.31241212773  | 230.649032296928 | 320.13475752314  | 902.691776563423 |
| SRR    | 57.50915811428   | 46.0023068797812 | 43.0971787292711 | 41.7614975630362 |
|        | 50.8875036861067 | 52.8421046802739 | 45.4799270968969 | 39.9576138799997 |
|        | 37.10170285405   | 47.0055981216687 | 39.2542963855807 | 49.8253396161069 |
| SRRD   | 55.4004611309636 | 50.9643363406241 | 57.50915811428   | 62.8201270538435 |
|        | 76.6914642534934 | 56.9320717885002 | 84.0691608193405 | 65.1637149462661 |
|        | 71.1894129030602 | 60.4837400912239 | 59.6608518093582 | 63.5693267269002 |
| SRRM1  | 487.749060801066 | 503.358125540411 | 727.181489302632 | 495.705224781189 |
|        | 621.012072500314 | 560.413725186282 | 610.678132881994 | 900.517711546397 |
|        | 547.442608452594 | 750.151825182993 | 595.012422454829 | 555.356799014777 |
| SRRM1L | 103.139459009593 | 99.864496342189  | 147.945429978177 |                  |
|        | 94.3229189690855 | 150.011814577972 | 133.259195601344 | 123.674164545425 |
|        | 121.336830564295 | 106.042585997437 | 76.011923854897  | 104.626873082138 |
|        | 118.49449420132  |                  |                  |                  |
| SRRM2  | 1796.47241860175 | 1580.58484708669 | 2650.09507972593 | 1184.75786736273 |
|        | 1041.84536202049 | 1093.44570094368 | 1129.19103016599 | 1377.24483375075 |
|        | 1285.49870339222 | 2138.23653387331 | 2018.28984520892 | 1343.66876893729 |
| SRrp35 | 38.2083710281545 | 41.7337506166619 | 45.310660704531  |                  |
|        | 45.0798408927912 | 44.3557408297309 | 54.8265655909623 | 41.253645578517  |
|        | 41.7419877611072 | 40.4220196471124 | 37.6383530120621 | 40.723990462047  |
|        | 42.8864415494484 |                  |                  |                  |
| SRXN1  | 134.681893127045 | 111.248876636045 | 133.798096986107 | 193.094756585577 |
|        | 272.545033107746 | 149.475318376458 | 114.947362505193 | 126.620595729562 |
|        | 121.270627995568 | 102.044838876428 | 106.897106266912 | 132.59650761791  |
| SRY    | 39.0620487644635 | 40.5400384479766 | 44.2405728317107 | 40.4359177791566 |
|        | 43.844855336215  | 37.8102105794655 | 39.7576136507593 | 40.7311497914871 |
|        | 43.2761454096265 | 46.7646877499666 | 40.9157352260901 | 45.2783024981315 |



|        |                  |                  |                  |                  |
|--------|------------------|------------------|------------------|------------------|
| SS18   | 107.754432832706 | 166.097017297742 | 150.709301569371 | 111.845105854608 |
|        | 93.7444359334292 | 117.520762118299 | 127.093495914275 | 97.4829901136163 |
|        | 175.508659149068 | 129.161393794351 | 135.106756607914 | 143.84904170479  |
| SS18L1 | 58.2401724760744 | 49.3581578587582 | 55.5005760719069 |                  |
|        | 36.0481934423077 | 64.9839099669442 | 46.4648868771662 | 56.393737074538  |
|        | 59.5080588072694 | 49.9547657591437 | 55.2214187655851 | 50.5810338885769 |
|        | 58.8676535438762 |                  |                  |                  |
| SS18L2 | 761.922486104216 | 1266.41536472956 | 1106.57048989685 |                  |
|        | 1132.19026676901 | 2978.46032143413 | 1045.20336057833 | 1789.07186722972 |
|        | 1205.82775512007 | 1325.2479053325  | 810.382224368065 | 863.082385199922 |
|        | 999.13039066242  |                  |                  |                  |
| SSB    | 214.691909801388 | 252.313870846326 | 208.743876555152 | 161.48562926756  |
|        | 290.261616334371 | 220.454785391748 | 182.273794635176 | 191.116764060948 |
|        | 106.70211644918  | 188.336316985251 | 188.912691033518 | 245.923368125413 |
| SSBP1  | 492.13077103258  | 487.065758294354 | 467.764770176415 | 513.109067557976 |
|        | 643.491217668415 | 590.139974503603 | 473.102747358971 | 572.43115808475  |
|        | 853.464809072841 | 329.677454924062 | 370.495645380436 | 614.088027946471 |
| SSBP2  | 103.010279797396 | 82.2766822827861 | 97.3929166450379 | 129.951091959262 |
|        | 97.0055689383756 | 239.885284409329 | 131.645714321903 | 92.227126770051  |
|        | 235.764999941441 | 175.771191968095 | 137.802147212644 | 172.39907939484  |
| SSBP3  | 82.7351935657355 | 66.0479079234982 | 54.9944485073259 | 60.8662233098324 |
|        | 67.1278109419819 | 87.3085516526362 | 65.1496567852393 | 83.5767232665142 |
|        | 71.9369353731849 | 68.8167148906225 | 71.1607965028029 | 63.1852348689647 |
| SSBP4  | 85.9636350040248 | 166.097017297742 | 121.023370640285 | 97.9497090233081 |
|        | 210.880198736298 | 133.998375673985 | 130.960165577212 | 106.51488068372  |
|        | 120.995347517172 | 104.587564056763 | 110.09868737254  | 82.5050369860039 |
| SSFA2  | 76.7820250461545 | 54.6793272901524 | 66.737740728688  | 68.4261608261522 |
|        | 61.954674965065  | 78.812106589086  | 41.0381860307445 | 49.3880946790306 |
|        | 60.5608545741456 | 52.3304586399695 | 57.0154839296649 | 60.8662233098324 |
| SSH1   | 53.7507429765038 | 55.6323803479191 | 58.112348043634  | 55.2214187655851 |
|        | 52.2089306840125 | 53.9517841438975 | 48.0283573444179 | 42.357910063876  |
|        | 41.3803269429468 | 48.8623729374733 | 56.4873776344986 | 49.904979214379  |
| SSH2   | 111.304424389891 | 89.0898346470643 | 127.694844372277 | 397.633328080609 |
|        | 113.18951586976  | 121.557478857883 | 133.576489624155 | 93.9880852748373 |
|        | 161.65846687852  | 121.557478857883 | 101.634888749356 | 94.5501397951415 |
| SSH3   | 89.6056978251991 | 851.108027634251 | 1076.05074395483 | 65.084620579901  |
|        | 363.67768546508  | 130.775349446374 | 247.511892014861 | 124.469290554848 |
|        | 253.802852066439 | 502.557430906865 | 438.22469176123  | 329.120125961774 |
| SSNA1  | 200.566335168667 | 146.355277438643 | 102.980622026276 | 159.12163104195  |
|        | 144.799432299339 | 157.109085253328 | 295.014183084118 | 152.17335005192  |
|        | 193.875712862166 | 195.790389809892 | 223.850148640071 | 157.979422616649 |
| SSPN   | 96.6833301748676 | 67.8208976798364 | 97.5849495690144 | 65.3191216270241 |
|        | 50.6470461863549 | 256.941243394182 | 45.223075311113  | 76.2258667419953 |
|        | 89.7862835647016 | 224.109805046747 | 153.177725521199 | 126.115065200084 |
| SSR1   | 667.837116137964 | 425.522158941437 | 467.764770176415 | 703.315796616275 |
|        | 728.468482500452 | 488.908231529696 | 252.134800295199 | 316.831358204198 |
|        | 904.487756674518 | 389.686780706341 | 366.615979176657 | 454.106740411779 |
| SSR2   | 194.827750623463 | 160.425627898607 | 170.932645135423 | 208.897032780128 |
|        | 246.725921565571 | 182.685579297058 | 167.872060678879 | 135.323750661937 |
|        | 189.737472782071 | 122.924027019519 | 121.37214545992  | 183.820203505757 |
| SSR3   | 82.6983700200815 | 64.8254097948745 | 62.9967097752591 | 75.4466520363487 |
|        | 75.7464604972652 | 96.9739786719591 | 88.9430141071732 | 52.9813204449021 |
|        | 77.1317865202676 | 59.9354531144375 | 56.4873776344986 | 79.1209792219434 |

|        |                  |                  |                  |                  |
|--------|------------------|------------------|------------------|------------------|
| SSR4   | 1601.52194699063 | 2220.90215179682 | 1829.30985071028 | 4299.4451139256  |
|        | 3395.70632198672 | 1573.61108703981 | 1817.14004766564 | 2004.94135236716 |
|        | 2122.39240932934 | 1053.67279913417 | 1236.32289322872 | 1099.52344340557 |
| SSRP1  | 67.4846787600629 | 80.3676231413295 | 82.6983700200815 | 63.6334154351075 |
|        | 109.398472684587 | 69.2685201884906 | 148.944852825695 | 111.333692153793 |
|        | 286.832539203237 | 86.500678864429  | 79.1922819549042 | 72.8306652548968 |
| SSSCA1 | 56.6086202928268 | 67.2649356062263 | 67.3469281984384 |                  |
|        | 58.3475983630509 | 97.3188285021124 | 79.4053001255904 | 96.7125250803971 |
|        | 50.1833483241864 | 79.2129308982479 | 52.4351670989268 | 46.824299585607  |
|        | 53.3059058105836 |                  |                  |                  |
| SST    | 35.5179217192467 | 42.0709558258414 | 34.4716904283753 | 40.646702696033  |
|        | 37.2567512265363 | 41.2567470068038 | 38.1793598983615 | 56.0496524902806 |
|        | 42.2577689927563 | 48.6124127998952 | 39.153226699662  | 33.0217499673686 |
| SSTR1  | 41.187562301961  | 38.7344853699576 | 39.0470836345045 | 37.0273924363983 |
|        | 36.5849073973352 | 35.2067831864574 | 36.4098694708483 | 37.33030683349   |
|        | 36.5474283500601 | 39.8873706855774 | 37.5343260962758 | 36.449101775775  |
| SSTR2  | 196.247893540766 | 102.490465676619 | 103.545764794149 | 173.925818790068 |
|        | 82.7394574977114 | 95.5022104475922 | 149.312893905408 | 324.582288788326 |
|        | 99.9896394343368 | 206.190699642477 | 232.879882989322 | 191.896416838806 |
| SSTR3  | 52.502055890816  | 33.3069622728735 | 40.4882741869718 | 43.074472921841  |
|        | 41.0885562160946 | 42.6575535390785 | 36.4098694708483 | 43.0390857698452 |
|        | 37.2810767789306 | 40.7063426028871 | 41.2598458726002 | 36.064718696392  |
| SSTR4  | 42.7150227340364 | 41.3610369241157 | 41.437237454134  | 38.5252456306656 |
|        | 40.6723334103791 | 39.9397419279057 | 37.1643693306382 | 41.5464765641928 |
|        | 35.1155486926999 | 41.3321861371202 | 43.3085358214154 | 42.4607795638552 |
| SSTR5  | 42.6036491382658 | 37.1685072112618 | 38.3166554965434 | 43.9282059368202 |
|        | 40.8873907150245 | 38.4330755397458 | 38.5066108855005 | 38.8495095797881 |
|        | 41.3803269429468 | 44.7958122466628 | 36.6298807161755 | 38.5279745308203 |
| SSU72  | 1570.45778081591 | 976.566026758227 | 1323.73429724066 | 1445.73674428909 |
|        | 2921.68921750799 | 1490.1549980903  | 2294.75523373329 | 1991.4199819544  |
|        | 2091.0611913538  | 1638.16317738035 | 1658.86829668934 | 1339.29022988209 |
| SSX1   | 37.9387791625384 | 37.10170285405   | 38.1972934752396 | 40.0164662097472 |
|        | 40.3452320167286 | 38.4330755397458 | 39.4859911554583 | 37.0390589468421 |
|        | 38.0766847742504 | 36.5297181616759 | 39.4410515050885 | 32.6597849238806 |
| SSX2   | 38.6454098044474 | 39.158815094656  | 43.5412709080643 | 43.3785777889265 |
|        | 40.7779767565889 | 38.5252456306656 | 42.3324995669176 | 40.2794475062599 |
|        | 39.1396772832431 | 39.7419744486802 | 42.2467808807513 | 39.0820394178305 |
| SSX2IP | 52.5792653122861 | 46.8236022402545 | 46.8267540220952 |                  |
|        | 47.9915414951747 | 48.1473938886239 | 58.0910843932181 | 54.9765783642973 |
|        | 41.9315419791594 | 38.1169703906207 | 55.4037482627222 | 52.8489752025797 |
|        | 50.8999542937724 |                  |                  |                  |
| SSX3   | 42.175859643566  | 41.8559558586378 | 40.9784333688086 | 40.137818555383  |
|        | 41.6806984441849 | 40.5889674764864 | 41.4397539024976 | 41.8792703207442 |
|        | 41.5337607553407 | 42.2455707947223 | 44.6286581923295 | 45.8546719310325 |
| SSX4   | 41.2424637338424 | 42.6458550554574 | 42.8270038153139 | 41.7238341401332 |
|        | 45.7538339834602 | 42.4064160495357 | 45.4454982426581 | 43.092198986295  |
|        | 41.633281066448  | 45.7435770462902 | 43.2631355848816 | 43.2776458914333 |
| SSX4B  | 40.2087556903277 | 38.0834507308871 | 41.554942319225  | 42.4061338151892 |
|        | 43.004943518025  | 40.650742261428  | 41.4186558780356 | 41.1575777497576 |
|        | 43.3262148375525 | 42.7275315121163 | 43.4424616940528 | 38.8495095797881 |
| SSX5   | 40.148780650831  | 41.5132248356707 | 39.0775870687758 | 39.5637454855233 |
|        | 41.1507980856436 | 42.4580504587581 | 40.4359177791566 | 39.9941474864076 |
|        | 38.3981095229401 | 38.3092241935352 | 39.2542963855807 | 38.0089018744739 |

SSX6 45.5758521267508 40.4772513262052 43.0971787292711 43.4410741327254  
41.4397539024976 41.0582900711341 41.3094485574845 40.0965255448873  
39.1790517315259 39.9948390976317 42.6366765186182 39.0536056496869  
SSX7 28.3262844159644 36.2103905554984 42.0621425894624 37.651298468202  
37.8679241954337 40.1428591998404 42.629412460409 40.931294690669  
40.3316153483289 41.8613406887824 42.357910063876 43.1805016690297  
SSX8 37.8386378737561 33.8237407699472 34.4716904283753 37.7469621225553  
33.7494761745342 41.3553369544097 41.0381860307445 35.5798430594271  
38.5252456306656 41.5435611403119 41.8168470823451 43.2776458914333  
SSX9 48.1473938886238 37.10170285405 46.9628278973178 45.334106390212  
46.0043807840705 42.8598805316863 45.6042625176633 43.3838505886856  
45.1569741609597 44.3187284857534 44.2925355984056 46.4499258373233  
ST13 246.771126452577 304.258586051126 254.322611819303 204.089652936303  
208.060345754611 516.076634990003 248.744491123257 237.401487995882  
253.605641311356 490.301992866742 434.841521967958 428.307428028806  
ST14 240.934550408797 418.410951118141 190.675425748381 122.412295645862  
190.548265163011 73.688423848106 452.969595001684 318.369837408344  
495.453743436613 186.101626144637 194.703024752864 141.784776736918  
ST18 38.5007204246293 39.9697332660833 35.4484652445078 36.5393857306744  
40.7779767565889 41.6590564937735 33.5578650644246 36.6452480995946  
37.6383530120621 41.5435611403119 32.2133093774284 37.9607839934735  
ST3GAL1 157.133627517432 396.167219131922 255.047622225942  
232.879882989322 400.327164003217 222.92930674999 166.488589768213  
249.889110678139 226.804294585045 109.994844561228 141.108035324183  
201.027801320306  
ST3GAL2 62.1448806673973 53.4109882045447 49.9256753636167  
100.344513700137 45.6895223823001 66.8632294055679 77.4046818339539  
61.6839343510302 47.9035532886869 51.1169368198437 47.299647867533  
44.0451487108213  
ST3GAL3 65.0031119608637 50.0642388903563 58.3702889417801  
53.1124375923907 79.3889841821749 102.791849084945 54.5772630900888  
61.016921238986 50.3245489035833 106.276392548097 91.8414653633828  
72.9051985681184  
ST3GAL4 345.294930735691 837.959914510114 292.389429869034  
139.385367339095 167.943170737481 160.605530211736 206.261432452217  
351.239677010973 221.049503614433 563.065549077627 410.402285012885  
227.817928402227  
ST3GAL5 75.885672222265 784.951880532127 761.341795853104  
135.92805172353 206.08791147394 165.751590932267 91.8733417805775  
87.9468208580228 162.895543924742 535.585999498708 765.145138238955  
355.04502859751  
ST3GAL6 65.3531590366085 52.7493349111555 52.0742951366864  
133.930007857002 45.4751076037511 64.0985088513857 41.5817737564592  
45.5581356216957 51.0062122023297 48.0211752672327 46.7386599624801  
48.27609330316  
ST5 113.218291314173 78.328947112997 96.8620230524393 64.5347406608537  
63.8315840603904 139.218017862207 62.4530276414691 76.8864157610323  
94.0140258999054 137.10896135739 158.01463829244 101.017461500409  
ST6GAL1 102.706563820232 83.8419777255838 77.1257647707842  
196.623560874725 72.2665537421443 81.9983163893373 59.3549213146532  
94.8556191290544 55.5086026637973 47.8594286145357 62.6885730386156  
53.3334895722793  
ST6GAL2 33.8558232866797 42.5269793679335 43.401782064778  
39.6292788039793 43.3332476888305 37.8102105794655 42.4939802311136

36.5393857306744 47.0804681460898 38.6454098044474 33.7948557837079  
38.745552403895  
ST6GALNAC1 86.0796981361148 57.0082102559228 105.308648028552  
41.1886975241176 43.2484996523549 40.650742261428 40.9157352260901  
66.0303950772736 41.6616444147804 49.8393069675192 55.6151308605445  
52.9609836781499  
ST6GALNAC2 37.7384958256497 45.6533175604486 59.6565330440648  
36.1562979552173 39.4693871570028 42.0574848021044 38.4005795891396  
40.831207953647 48.8842909466002 95.6182216943758 60.2867996701867  
68.0751111916102  
ST6GALNAC3 45.2421183842044 47.8947595316832 46.3150221024046  
53.8732900241064 45.4751076037511 47.0504142893738 47.7390230243778  
45.0972184964705 46.5411372437515 47.4767851750188 50.2203578628217  
51.7833333848627  
ST6GALNAC4 86.9816932158186 66.8026147385682 55.6282425338897  
97.3870880869036 81.8648220673828 68.5174271063894 70.2288685232877  
93.879589378061 56.4740004877665 77.3640580819535 70.0697974278875  
70.0196904419961  
ST6GALNAC5 61.9504984796308 43.7644428186265 38.6005272730664  
49.9014504704021 43.9450023643394 57.0775902639215 40.6750540874299  
43.7396619462033 42.357910063876 54.8979897528792 47.9942520395434  
69.9767092409915  
ST6GALNAC6 236.374695859748 90.4512650366645 89.5597629049747  
143.822560762049 109.922909644299 322.509777895373 108.558977253184  
139.062073456923 88.7605288058249 297.990925644625 246.680724959444  
230.787791652978  
ST7 98.5339473137891 92.9747592911324 100.114114765033 93.3216420803293  
102.706563820232 117.3417887148 77.5813459454823 91.1834104205004  
138.738440901853 100.683437452985 102.471939526704 104.02653369229  
ST7L 43.3085358214154 49.7827734675743 48.3570240922825 51.3851157261451  
48.6795178347248 44.7030043309684 47.3761398201373 42.0494116081998  
54.6538849155354 59.7444979429174 49.9731199725127 53.5643281930979  
ST7OT1 49.1868644496737 46.6314009405034 50.8303921211581  
42.5664883002833 48.1473938886239 44.0804700754786 46.1634822993009  
48.1591264215184 51.0062122023297 37.920964499903 46.8954576545929  
42.6758568421347  
ST7OT2 37.55264801907 38.0226905622357 47.0055981216687  
46.1673159982664 44.147557390293 40.244271403831 41.4742337714895  
41.7419877611072 40.8970401536578 43.6033221838149 37.6484782516569  
44.6484005362281  
ST7OT4 39.266565827316 37.3634897565502 36.0306975524309  
38.6414316877471 36.9060997041453 41.4508241771315 37.0564573649223  
36.9355798143571 36.4476883897928 40.7063426028871 37.1059647239814  
36.1647506311964  
ST8SIA1 43.9309845324767 40.4772513262052 35.1431174667937  
39.4569929845912 44.5092684716474 49.2050538150106 40.2601451506332  
40.188873541274 40.3316153483289 47.9056710878325 44.6286581923295  
44.6484005362281  
ST8SIA2 52.0299937917925 41.8848959280916 40.1985790927248  
38.2041059863839 38.2496050953547 35.8227939208521 42.2577689927563  
40.831207953647 42.8036731479932 39.0648733099061 42.170702295259  
42.7782216342806  
ST8SIA3 41.3387790895716 41.8848959280916 43.7085219318425  
44.6131679221578 43.9450023643394 44.7044140979108 49.9032148112001

44.3521099857368 41.5296458719756 45.1569741609597 46.0095710163378  
 48.0350549043063  
 ST8SIA4 49.6810364977865 46.3635803515159 48.5340594737696  
 93.8630393470857 45.6895223823001 48.1997158668729 46.3715909653832  
 44.8623097069578 40.5443356330931 46.3635803515159 46.4432326846508  
 42.828737648529  
 ST8SIA5 40.148780650831 35.8227939208521 39.2707964550441  
 40.0698728584484 47.2074332636566 41.554942319225 42.4939802311136  
 44.1311654985682 45.3756389170606 46.7646877499666 44.0409178714232  
 35.7451401627836  
 ST8SIA6 41.6354649482853 40.4359177791566 44.7829632472754  
 49.9014504704021 44.0451487108213 42.4580504587581 43.0930293831497  
 42.7431359850339 41.2870505273664 44.8997235283254 44.2142581488029  
 40.8681871019812  
 STAB1 110.729504563799 150.387474375456 130.703767898434 179.07886477603  
 102.282066142307 206.312848708143 68.4380822448123 136.429803886927  
 51.0062122023297 96.577572948724 98.9560329133205 126.956031076807  
 STAB2 37.9387791625384 40.148780650831 40.1985790927248 40.9607305725196  
 36.4434672195785 51.8103411703261 42.0605906240248 41.4508241771315  
 43.1805016690297 44.8997235283254 38.079222289614 38.8495095797881  
 STAC 42.3433931248155 42.3550738181144 39.3709357615493 38.4208429103799  
 38.4540849632254 42.6575535390785 38.4005795891396 41.6466169548846  
 38.9006788676407 45.7911932481722 46.972521499515 42.4607795638552  
 STAC2 42.6036491382658 42.6022652963326 40.931294690669 44.550322123994  
 44.5668141895992 44.0804700754786 40.7910160811527 37.86982638952  
 48.5792058061372 43.0919221375514 44.6286581923295 46.1592873342534  
 STAC3 43.0930293831497 35.4484652445078 43.0971787292711 34.3595588146954  
 40.5710637884029 36.6996187567892 38.2933870238743 46.8954576545929  
 42.7150227340364 40.5090849993014 37.7384958256497 40.4639532172338  
 STAG1 97.5464355320239 134.853649092952 92.804679821289 138.765621737736  
 104.704892803169 139.989008296272 116.913991315353 92.6230008876347  
 129.299077627671 106.160416826673 101.120656274371 121.354667375673  
 STAG2 70.3757673501097 56.7272804480684 76.450993090133 91.1057573288203  
 96.7351644023249 96.6957892186886 97.1131393750315 96.6485200415333  
 100.975810139572 75.5861488664745 76.1382217104599 106.125117937458  
 STAG3 44.9896851005259 51.2405397507224 47.4740726032707 66.7750249658122  
 44.147557390293 42.157627240486 56.7780520416533 52.1788489555942  
 50.0526763693329 51.5855515705917 42.0750889188255 47.6040671292013  
 STAG3L1 74.7955767483841 83.0959169307948 94.8766888888828  
 52.6947911480086 80.8238125943267 54.5952754712007 50.9091298648755  
 59.7118480874431 78.7991099741789 52.9531187309739 57.3531401768461  
 65.1757400078647  
 STAG3L2 432.001201940414 314.458148321064 313.233036704221  
 178.858202962948 374.601792595646 132.745388099039 189.204794959564  
 521.029507993615 367.235521372008 301.139592414061 299.890705180422  
 292.600202149564  
 STAG3L4 64.1882546112044 81.2182827624857 51.5292723244077  
 86.6411972262415 71.9737561190706 110.757899996422 87.455991111513  
 60.419911425109 82.8770530537113 59.0630473216622 76.331185787832  
 77.3999378505514  
 STAM 148.477784236365 208.379981648601 169.557757933574 147.902378647394  
 209.138751343454 155.01005229951 211.669885749793 175.28322146764  
 165.496075703734 119.979854891563 119.124583755587 250.040637073537

STAM2 56.0477607422828 62.2150049214174 67.7235257493648 76.2591822114739  
67.9032387662129 65.4643755537228 46.9929836306816 52.9813204449021  
55.5751438859404 47.1001757441025 52.5154971256566 67.1675878355908  
STAMBPL 161.326580647514 171.800185639868 223.040734249612  
127.283778555702 169.561107057293 168.655833116537 152.456314990408  
265.667557678228 174.685146336531 123.978615472736 150.801729138762  
168.798543634965  
STAMBPL1 140.063595285844 125.290426098227 104.832753086298  
199.522267292552 115.827601697699 183.77850568836 111.131550402854  
131.258204302177 79.7061415085215 181.705809767061 144.858109227889  
159.937192675974  
STAP2 76.6868184563568 162.352052340273 167.075682925069 47.5709914939583  
196.389446842567 60.0372015630618 182.757684959879 132.082375865767  
193.043344611355 125.891602778425 123.506372870621 114.537682317715  
STAR 47.4767851750188 44.8529259387308 48.6574544556862 44.622459983127  
48.4670130605028 44.7804080899431 48.5721799977026 52.9813204449021  
46.9022898759811 54.0374522273907 50.9958345917774 43.9541718254769  
STARD10 298.721050521396 445.875994521817 595.790464730847  
177.722828589884 594.184150517102 234.308728996238 588.064524478384  
311.301613620475 584.724083441601 434.523449093691 365.723799716137  
250.65667565007  
STARD13 50.9958345917774 51.1596992013828 54.4825201506931  
69.2406343120143 53.6907197364586 69.4214927857472 42.0010841910729  
58.2401724760744 43.4344389653492 82.6428395563033 82.1323695817857  
68.4720753153522  
STARD3 67.1387898740161 54.1773909134233 57.9279989359711  
46.3203995372658 64.9072331703985 42.6575535390785 75.287377665837  
65.1637149462661 103.720371491639 52.2256177934134 63.7598547294225  
51.138877923954  
STARD3NL 98.0307965290686 114.796237914478 95.3754438202863  
167.848222139162 96.0418367475772 142.444971930298 95.3754438202863  
72.9074911694002 122.642481894309 72.6549171886783 72.909783842776  
122.292794686468  
STARD4 43.0001432913058 37.3634897565502 39.4710743516517  
46.4555908533915 37.6527901109005 41.3553369544097 36.634024014558  
40.1474543172332 42.0621425894624 44.8997235283254 35.046946054314  
34.3409660445447  
STARD5 52.9849979441253 94.5261917871909 84.7851173379268  
58.7338159410728 73.8251606025227 62.3497263884167 48.5361215129944  
44.0736170668178 70.6568303458436 111.438294720953 92.0958762013613  
70.0907269565408  
STARD6 36.0144420013819 35.2143190355414 41.9666541498638  
37.9875302985336 34.2638875325204 37.5887129572848 41.8315602975157  
37.5511560880902 43.9450023643394 40.7063426028871 37.4642807402741  
38.9496515344837  
STARD7 487.261132702908 498.284928805673 388.74199767336  
451.820169649522 513.891389190131 328.295200683554 364.439669236186  
386.170232791927 586.735744054398 365.860501246879 395.457351443921  
355.495119544081  
STARD8 50.315768338317 49.3581578587582 53.6837370963602  
76.450993090133 42.1650127805175 76.889690218685 37.0564573649223  
53.3094843669564 40.3316153483289 49.6203214143464 54.0374522273907  
53.7442594289333

|        |                  |                  |                  |                  |
|--------|------------------|------------------|------------------|------------------|
| STARD9 | 38.7537364570873 | 43.8495248991589 | 38.6727842796202 |                  |
|        | 47.0874209746031 | 39.1650142708257 | 51.294537308199  | 43.0930293831497 |
|        | 37.5511560880902 | 33.6288663955758 | 43.401782064778  | 40.2649309204478 |
|        | 42.4607795638552 |                  |                  |                  |
| STAT1  | 789.511653564341 | 1027.59400018637 | 664.453262499828 | 1040.102982885   |
|        | 238.647490689325 | 313.399524593316 | 368.078954546259 | 717.997180920384 |
|        | 297.187417426993 | 373.46798029115  | 536.013150313097 | 274.328990210853 |
| STAT2  | 1339.29022988209 | 833.136660528149 | 820.147156401172 | 986.40790007743  |
|        | 515.216890329893 | 374.601792595646 | 505.650842529816 | 1333.01876209753 |
|        | 552.162906190653 | 1249.41227924272 | 839.850453078119 | 689.228901128857 |
| STAT3  | 345.876877384089 | 273.379591993579 | 385.36587480414  | 622.435313940734 |
|        | 254.322611819303 | 384.080719411412 | 294.849830545881 | 188.943404504867 |
|        | 591.192020333181 | 191.59357986481  | 335.330937634207 | 386.00975855841  |
| STAT4  | 73.6362523983338 | 71.0340758556049 | 78.1683130800805 | 247.04098109003  |
|        | 45.4751076037511 | 52.7156971154405 | 53.8687221233237 | 62.1934012861178 |
|        | 40.2274522635576 | 54.7827221235949 | 56.4873776344986 | 50.4847465816184 |
| STAT5A | 186.301404367238 | 176.363810387584 | 133.981674663494 |                  |
|        | 381.426926151034 | 149.375918224338 | 317.483708873867 | 187.982920458868 |
|        | 190.854807132673 | 231.733564500645 | 198.056931905227 | 259.812381486915 |
|        | 200.566335168667 |                  |                  |                  |
| STAT5B | 124.71462125633  | 133.401306624347 | 158.17598244564  |                  |
|        | 190.647389246848 | 127.345094323724 | 185.360921731157 | 119.369994922092 |
|        | 133.576489624155 | 156.65747550889  | 185.395460281034 | 180.592281750722 |
|        | 125.81889994067  |                  |                  |                  |
| STAT6  | 139.191263237202 | 324.126628444078 | 316.327885002562 | 256.80504454312  |
|        | 160.755701876741 | 258.446095955014 | 174.492066109537 | 244.070778149931 |
|        | 364.337811621248 | 430.743220222202 | 259.220844287491 | 202.833844963097 |
| STATH  | 39.5676051939342 | 40.8880530359822 | 45.7452456977857 | 44.0991023527481 |
|        | 40.831207953647  | 43.1180113655693 | 41.1886975241176 | 41.8417024632349 |
|        | 41.9097689475185 | 40.9558083259517 | 41.2598458726002 | 39.3789825717286 |
| STAU1  | 665.510487460287 | 668.584452504579 | 685.386956092142 | 548.217757366495 |
|        | 455.774407260725 | 671.959673037066 | 861.427193617946 | 746.847753035399 |
|        | 630.53864514662  | 582.017297217368 | 566.77872642437  | 635.52621743309  |
| STAU2  | 118.49449420132  | 139.022985518859 | 107.971806573919 | 88.9113618165337 |
|        | 76.7820250461545 | 90.5359675350156 | 122.988056802699 | 75.2101993995344 |
|        | 150.789911774534 | 130.62791061956  | 114.876346000655 | 119.947688643528 |
| STBD1  | 87.069143362676  | 55.7405934254857 | 52.7005092555102 | 48.309866878365  |
|        | 43.1252272136667 | 119.866221751572 | 44.4639405506967 | 112.805898501551 |
|        | 57.2716485658185 | 62.1035858593388 | 62.8408273986904 | 80.6200293361016 |
| STC1   | 308.841311505431 | 96.4740168904128 | 249.776078532596 | 84.4422623834916 |
|        | 338.966238813782 | 235.294634126766 | 77.9028721785469 | 682.227514643175 |
|        | 71.787754116845  | 111.248876636045 | 182.06733830953  | 123.689895848613 |
| STC2   | 164.780216383719 | 72.9051985681184 | 83.1874704625702 | 64.5347406608537 |
|        | 185.165420581989 | 108.589036223189 | 63.928488869459  | 130.313381811168 |
|        | 234.778900405354 | 82.8275497073451 | 73.7060605978536 | 163.43197105141  |
| STCH   | 40.5654775358427 | 44.9863726205428 | 42.6920011548175 | 46.9919960628953 |
|        | 46.7058093820839 | 43.8582747295766 | 40.6216891610774 | 40.4359177791566 |
|        | 42.1594905198929 | 43.4544762830742 | 46.0905079010237 | 44.4951343330035 |
| STEAP1 | 73.3372903962779 | 49.9890328304193 | 52.4898616460704 |                  |
|        | 74.7047606031323 | 54.2560654312606 | 65.0217598379984 | 70.2517233744848 |
|        | 62.8362064074814 | 52.7512110769042 | 43.9835428027381 | 50.2203578628217 |
|        | 69.303129494807  |                  |                  |                  |
| STEAP2 | 110.362432903746 | 81.9727730469029 | 89.3168921945222 |                  |
|        | 87.6178717341967 | 53.3683962805281 | 115.659933682533 | 117.869393694564 |

208.897032780128 64.3425836997629 171.722423740869 213.309547409053  
 166.834334710682  
 STEAP3 74.4565795414712 149.8814624626 117.689172019617  
 99.3744103955071 149.899176549323 59.9546218258435 68.5725871332774  
 82.1659654020827 97.2927456872797 98.0023132593711 82.4467808843629  
 91.5618002664085  
 STEAP4 42.0532901689036 42.4493032770053 43.0971787292711  
 149.629940171074 43.4544762830742 99.7445419301229 50.5252048155459  
 44.2159020605784 42.992884918158 39.8873706855774 44.0409178714232  
 44.8372404608604  
 STELLAR 37.55264801907 36.1232327599945 37.1643693306382  
 44.4367387274922 42.7982502551634 39.0266821712099 34.9344532055397  
 35.9023742468744 37.6383530120621 37.5343260962758 35.2339574411711  
 36.6603338274678  
 STGC3 38.1169703906207 37.6383530120621 47.9035532886869 38.2041059863839  
 49.5666074434383 35.9305494063137 36.7356360093603 44.293922970134  
 41.6616444147804 50.6486940895674 47.5439485437351 39.2469742642337  
 STH 45.8108990837624 46.5650556481721 43.0016969050339 54.2886483704949  
 42.269054475455 52.1024135605001 48.8319884367456 44.293922970134  
 43.6670755115848 41.4397539024976 45.310660704531 40.2669497398702  
 STIL 177.047048502104 155.200138285298 109.979856686854 80.5537984388921  
 252.775631043952 73.688423848106 265.026710493466 349.480794966845  
 218.313812956524 61.9882398986333 59.3379918468928 59.8760452220989  
 STIM1 85.4713284900688 80.6083247572711 73.2814174739782 63.6334154351075  
 63.4753448572245 95.8905266177905 55.8019623191927 55.421880601441  
 96.6294773538052 113.994256868581 95.8149149211251 97.2927456872797  
 STIM2 41.2424637338424 55.8046062733709 48.0191002461099 49.5424425850549  
 57.8039717833131 65.813547096222 48.8319884367456 52.5098795466615  
 51.2776048338 43.7303813515864 56.1379957867124 46.8129509799753  
 STIP1 469.78210773245 612.014486689487 566.318259999405 461.83420090894  
 1076.9976059406 572.667024472672 997.492549573274 683.75696650704  
 628.84789420227 539.720977763663 569.966632625157 483.882804472844  
 STK10 74.2151462073098 73.3950348855139 80.7338782543351 218.056839407813  
 59.5844022026141 62.3497263884167 73.3042538589134 80.9092480872499  
 71.1894129030602 63.0119737420787 62.7743500747415 57.1441484662045  
 STK11 41.8409927585705 50.8812920005251 41.437237454134 48.309866878365  
 55.9283039581662 49.1013967533186 43.9450023643394 46.1673159982664  
 58.4891791448514 49.4006068471301 58.2941346100716 45.6692241948108  
 STK11IP 102.044838876428 115.840734064724 118.854313907627  
 105.234356571498 90.6661301391451 79.5619528847913 67.8919712859031  
 104.587564056763 89.0203733091224 119.493400362694 111.760213205992  
 94.1128427766432  
 STK16 47.7806898452396 43.6601381712644 46.1653991089885 41.6564075217517  
 42.6022652963326 42.2577689927563 44.14228771963 46.7980335276155  
 42.7711437826303 45.5776159432079 44.5136947552585 46.4177974246069  
 STK17A 38.304249186058 41.4508241771315 40.8420925848403  
 42.2496337895968 42.269054475455 51.294537308199 43.6753843488695  
 45.0972184964705 43.6670755115848 43.9450023643394 43.9450023643394  
 49.6629259325705  
 STK17B 57.2960245538881 59.7686826549947 58.865217170468  
 167.095818680513 44.4489662507893 63.1604223919703 58.9656737189764  
 60.419911425109 58.0139597055449 41.4659679379482 48.3570240922825  
 48.3913169169846



|        |                  |                  |                  |                  |
|--------|------------------|------------------|------------------|------------------|
| STK19  | 337.51861578231  | 206.703865774092 | 252.649651285136 | 191.426587373391 |
|        | 256.55408314817  | 254.322611819303 | 306.746364062777 | 192.43245357593  |
|        | 207.513604688444 | 208.743876555152 | 215.869541768982 | 194.355765743782 |
| STK24  | 583.421166842011 | 1219.52011418558 | 863.082385199922 | 582.511224532378 |
|        | 1217.21440297138 | 596.384327208699 | 973.363245512859 | 552.480471244789 |
|        | 955.088515235485 | 755.852629128252 | 730.168814097451 | 775.515071756239 |
| STK25  | 182.757684959879 | 291.021345839327 | 271.50380898418  | 145.073599404007 |
|        | 133.541341560868 | 158.334581991361 | 186.620669365322 | 149.515611848932 |
|        | 161.092366817598 | 170.560304063093 | 212.803471204964 | 183.165559564289 |
| STK3   | 374.723141438448 | 191.59357986481  | 151.601402122351 | 240.217589414972 |
|        | 388.661268904002 | 368.913147706435 | 192.470747766298 | 188.408367998553 |
|        | 347.829279462722 | 286.243476131448 | 298.367217540986 | 390.647843814517 |
| STK31  | 43.5710871617107 | 40.4904698474072 | 45.0985088502363 | 43.1472052452951 |
|        | 43.4544762830742 | 39.4462710976337 | 41.1742244762318 | 43.6753843488695 |
|        | 45.6061814448258 | 39.8517950672116 | 41.9430737035925 | 39.0536056496869 |
| STK32A | 42.3433931248155 | 42.9358255168086 | 70.4794854241035 |                  |
|        | 39.9697332660833 | 57.6791750431251 | 39.0266821712099 | 42.1607322031054 |
|        | 54.9919060580109 | 53.3094843669564 | 40.5090849993014 | 38.956280281655  |
|        | 46.4499258373233 |                  |                  |                  |
| STK32B | 58.3702889417801 | 55.2893984191264 | 48.0191002461099 |                  |
|        | 70.7202372217584 | 46.9906120932727 | 88.9738853594498 | 38.4005795891396 |
|        | 49.6203214143464 | 39.853866204927  | 67.8233625051884 | 52.8489752025797 |
|        | 62.5447504571181 |                  |                  |                  |
| STK32C | 42.8036731479932 | 39.0894172982439 | 33.7737772393677 |                  |
|        | 38.9534635879195 | 38.1644569189523 | 35.314469458379  | 42.0605906240248 |
|        | 37.33030683349   | 38.9006788676407 | 41.0057887014368 | 37.9230440150891 |
|        | 49.3087627580849 |                  |                  |                  |
| STK33  | 44.6231541342    | 39.1982470626863 | 42.0621425894624 | 39.5050383901884 |
|        | 48.8381507187986 | 67.3469281984384 | 57.2758638871082 | 47.3791873993182 |
|        | 59.9770720847728 | 50.6486940895674 | 50.7903824729818 | 48.4535991392809 |
| STK35  | 110.048921728774 | 107.748050894857 | 88.6771566133367 | 45.1944222548351 |
|        | 142.1823033942   | 77.0226403968683 | 60.9648845690177 | 90.716460692818  |
|        | 64.3425836997629 | 60.8730416435467 | 72.3822545261582 | 68.9258122619781 |
| STK36  | 534.629009719855 | 310.057823337984 | 367.235521372008 | 161.25239489071  |
|        | 504.847507464269 | 177.27613997459  | 256.215133513379 | 653.880422442079 |
|        | 261.470129378265 | 437.542517888395 | 338.415128695208 | 262.824698774297 |
| STK38  | 677.855726232203 | 309.06234888929  | 536.013150313097 | 261.6201598868   |
|        | 297.950627905767 | 337.156068385541 | 330.391945158969 | 288.687391623935 |
|        | 692.630044242985 | 548.217757366495 | 574.847203528544 | 427.199940706169 |
| STK38L | 61.6544855697851 | 48.7847528954724 | 47.0940613507321 |                  |
|        | 53.0284011078097 | 43.6587492470348 | 53.565717255469  | 43.5627649099623 |
|        | 53.1052228246467 | 56.6079099547057 | 56.9463858443402 | 50.5810338885769 |
|        | 77.7852875052734 |                  |                  |                  |
| STK39  | 162.02498480452  | 202.708232693973 | 247.612180415367 | 145.193498675059 |
|        | 323.453481668415 | 322.888035865453 | 352.246108891022 | 371.513106715598 |
|        | 162.401599565682 | 592.399245288911 | 508.474794786176 | 675.832363405287 |
| STK4   | 397.520960156896 | 453.456591501321 | 421.013324906569 | 1078.86166154061 |
|        | 338.72596574658  | 390.331295238889 | 463.684654468418 | 577.993850127555 |
|        | 257.194689822426 | 578.311131274653 | 499.744856832174 | 464.352441400358 |
| STK40  | 226.023657887826 | 278.453446231317 | 211.868223638158 | 395.875593488613 |
|        | 171.176393131741 | 485.310097523194 | 235.826763901522 | 251.4927207704   |
|        | 136.004535901075 | 251.374750265492 | 244.109166881519 | 245.769212889294 |

STMN1 70.7760293129408 84.2385359528743 63.6930574464881 52.3896785600751  
 115.048869605875 54.6414321010929 219.918644151214 160.117375210168  
 116.793627324217 46.7182294568603 46.29198852834 55.0334479749824  
 STMN2 47.2862299990938 50.164201758929 51.9490810272761 54.3753177017125  
 58.6010484516703 46.6397391251762 47.4439407315335 50.8160430472218  
 47.3213303943727 47.7180816682562 45.3597029614942 44.9734311311394  
 STMN4 36.5393857306744 37.6383530120621 39.6451483836089 37.0732977341185  
 36.4434672195785 40.3357777530419 38.7337086062875 44.0390019242862  
 40.0403898620771 34.4875013487777 44.0409178714232 37.8490162439785  
 STOM 404.674869177442 207.928770428477 254.159017331462 410.808988840343  
 202.154195547644 659.666977039793 72.768998788927 214.127390534906  
 84.9756044280631 262.153247969144 313.660064080622 484.482971152057  
 STOML1 68.0700069295224 58.4891791448514 48.1331309338997  
 66.0397471691747 45.2556760873335 72.3523300799007 74.7534423194688  
 75.4272782742534 69.4677195088043 86.0832675838966 87.539553421006  
 64.0541263553251  
 STOML2 842.82310025167 817.631505579476 465.887689708274  
 452.139416552986 1035.67547271468 723.210613328966 1337.53997230271  
 974.296760034984 739.541009338849 781.923984640049 773.781266760336  
 811.142611128461  
 STOML3 48.1125722136997 41.3610369241157 39.9101908547397  
 41.7614975630362 43.9450023643394 39.0266821712099 43.0930293831497  
 37.5511560880902 36.9060997041453 38.4187686307607 42.357910063876  
 42.6758568421347  
 STON1 71.5484567134601 41.554942319225 44.7829632472754 76.9373289454707  
 46.9906120932727 381.533380474563 40.4359177791566 42.357910063876  
 33.2715481910159 277.837785971587 199.035083736742 426.933064567744  
 STON1-GTF2A1L 42.5193208629123 39.0894172982439 41.6079958749402  
 37.4223289687135 35.4484652445078 49.1013967533186 40.3302268293707  
 38.3684202018524 40.5912213523345 35.2880714952489 34.174642681781  
 40.0557788909923  
 STON2 39.6609238036815 42.8542642792862 40.931294690669 46.1673159982664  
 40.8873907150245 37.9003288112261 40.7910160811527 43.3262148375525  
 44.8003345643334 39.7835513496873 44.1148826235374 39.0536056496869  
 STOX1 46.1513019317765 47.3536182445315 44.696023817801 41.7614975630362  
 49.32293280121 56.1115976952096 46.1634822993009 56.5914743235484  
 71.5327770882433 46.0713306971594 52.6547683625018 54.1090536870282  
 STOX2 124.71462125633 60.1102859845739 91.9375312869437 80.4007868743886  
 179.322661675979 132.364260893831 372.239177888445 341.666968456707  
 176.816741656659 602.441843384617 497.591040004541 352.917938567734  
 STRA13 521.029507993615 503.358125540411 611.776512504215  
 316.660303090646 721.887210480162 386.372142079981 1000.25990882273  
 775.931494648677 788.232434009173 392.51606894011 339.210875653066  
 265.367588517131  
 STRA6 146.42128243217 49.4067286971348 42.7303139017786 93.9228336493696  
 42.3685136297603 41.2567470068038 41.9393838138203 69.6473843718254  
 44.4395580493118 40.8049408996274 42.2618615571566 61.4366256816323  
 STRA8 39.6609238036815 35.3307157989724 38.6005272730664 34.8137085420423  
 31.9468644542969 36.8059561571675 37.4772922422734 39.2672712041774  
 41.9635525160083 35.7202909649682 37.7384958256497 39.2469742642337  
 STRADA 100.616027485975 105.15507796881 105.890652858478  
 94.4034248132634 62.7743500747415 80.9821967801845 94.1289383735162  
 75.5431466087264 111.643323610073 125.172065218289 107.154549409927  
 110.074666148474

|        |                  |                  |                  |                  |
|--------|------------------|------------------|------------------|------------------|
| STRADB | 187.315844580254 | 81.3696465421645 | 84.1401040507557 |                  |
|        | 120.068630086702 | 105.589475270494 | 109.607667469015 | 140.01041112896  |
|        | 102.380096190518 | 104.900627862215 | 105.71315237465  | 91.2681347227088 |
|        | 93.6260859565297 |                  |                  |                  |
| STRAP  | 166.847053797281 | 188.734299563005 | 124.032371632524 | 154.509548705054 |
|        | 149.295715963625 | 189.650905999631 | 149.551650453179 | 137.831070407907 |
|        | 219.838542502016 | 118.244019427757 | 125.07621933584  | 205.650076927315 |
| STRBP  | 92.4896666046729 | 91.3941563889513 | 58.0218262176065 | 99.2432911346944 |
|        | 115.408418935236 | 61.7091923488929 | 116.311176407088 | 80.7067505750848 |
|        | 109.979856686854 | 73.8313212063649 | 70.5133836963171 | 89.9460400399039 |
| STRC   | 45.1912496459517 | 44.3529919625344 | 45.063792968927  | 46.0228732507872 |
|        | 54.3554233228353 | 46.3203995372658 | 44.4639405506967 | 66.8733921725051 |
|        | 52.0228313532986 | 49.5635427311883 | 47.712616859593  | 48.9733758107788 |
| STRN   | 112.421316052392 | 86.0230765383602 | 97.3066473777771 | 117.948047796034 |
|        | 87.5573893277742 | 98.5609311953771 | 135.129418330559 | 85.8694579123452 |
|        | 85.8694579123452 | 85.0218838801011 | 75.8976034525022 | 79.0373265781543 |
| STRN3  | 143.194693525776 | 155.392743674792 | 178.559242961756 | 186.350104132737 |
|        | 170.450752247109 | 221.015209694864 | 96.7125250803971 | 152.36389833079  |
|        | 159.973746908596 | 176.670909065664 | 169.223049028418 | 290.956194006554 |
| STRN4  | 114.740276704399 | 84.1922656126304 | 77.4246856935596 | 64.8154690917175 |
|        | 106.125117937458 | 69.1523164481201 | 80.4479092568961 | 66.8733921725051 |
|        | 110.909109947659 | 79.8511759086625 | 83.5069968129733 | 67.8919712859031 |
| STS    | 63.200752695983  | 44.4411734611229 | 44.2405728317107 | 39.3750969348308 |
|        | 42.0709558258414 | 41.0582900711341 | 50.5252048155459 | 62.7950861902067 |
|        | 45.7452456977857 | 49.3000844711116 | 51.7538628098347 | 52.7530873093837 |
| STS-1  | 133.1387411908   | 73.6855877240541 | 67.8010199320754 | 222.81957100654  |
|        | 130.758455807465 | 70.8674195845729 | 440.830948933792 | 114.533239859288 |
|        | 75.3761360028971 | 130.192692323611 | 105.814959179397 | 125.512567429299 |
| STT3A  | 383.00934152588  | 527.686970237622 | 531.36214636517  | 419.46223841313  |
|        | 698.105755081829 | 339.854688605186 | 406.964801954621 | 435.901460958456 |
|        | 462.105603187328 | 246.568253751149 | 287.494740260715 | 527.97309138633  |
| STT3B  | 99.5058761858884 | 132.730723037077 | 158.702003835578 | 161.25239489071  |
|        | 223.040734249612 | 122.504770242427 | 122.187287716445 | 127.093495914275 |
|        | 150.286570958507 | 64.428683021978  | 72.4834467838798 | 100.494620361408 |
| STUB1  | 206.703865774092 | 286.832539203237 | 426.622204035624 | 218.446312290024 |
|        | 233.72882333861  | 366.915943380617 | 223.562130663956 | 150.405742308999 |
|        | 307.002236094206 | 301.728842562175 | 390.202312411165 | 236.10027586633  |
| STX10  | 301.025314855652 | 248.645558594929 | 337.363827785838 | 313.046160403661 |
|        | 380.4099232546   | 275.882262550383 | 366.515210930763 | 339.679549262298 |
|        | 533.468347491982 | 415.15150032168  | 304.49707512712  | 260.656475394736 |
| STX11  | 83.374777060444  | 105.563773939475 | 73.0128142320238 | 897.198663109723 |
|        | 62.6860949544223 | 136.711122812062 | 134.162430146473 | 92.804679821289  |
|        | 63.1091746640396 | 60.2877434874622 | 73.408861359425  | 106.020559220488 |
| STX12  | 133.626390404589 | 91.7296524744575 | 122.405413080836 | 125.801834682035 |
|        | 89.9284109077375 | 194.862177434028 | 118.483499958227 | 125.484233748017 |
|        | 89.8957070711076 | 179.433109488671 | 167.653939596625 | 221.65810716537  |
| STX16  | 355.288272452203 | 232.879882989322 | 268.047342640491 | 194.189674572424 |
|        | 400.973553604192 | 250.210134743225 | 265.930422462959 | 298.420882349382 |
|        | 234.113622230498 | 383.371300272181 | 424.87896140215  | 398.641868389511 |
| STX17  | 56.6951078698291 | 50.9643363406241 | 42.5406888281114 | 47.2009420656854 |
|        | 46.4343327861696 | 52.9482338979681 | 55.9276266345493 | 54.2877981508636 |
|        | 54.0192060888782 | 57.8585041080995 | 60.4620008899889 | 60.0940570991178 |

STX18 41.9407041937973 45.0115870036541 42.4580504587581 43.3078542962968  
40.5710637884029 41.3553369544097 48.1747307200218 39.7509165247419  
52.3579564953125 46.7646877499666 46.5650556481721 47.7962548556026  
STX19 124.22494803053 41.2598458726002 43.0016969050339 43.6726153508978  
48.7288537840562 41.9543948167375 43.8206425661746 46.0633179231318  
64.9030399249327 63.3006977162657 45.0589947942306 55.1804535845496  
STX1A 148.925503526873 72.9051985681184 271.674332647296 79.4528447794527  
95.4533981420022 68.3234331335073 72.0568616357755 123.800965644574  
105.434580236651 67.3308332069908 67.6271456814495 75.4935574755043  
STX1B 37.8386378737561 43.5182502375207 39.8299340037009 41.7614975630362  
40.3452320167286 40.5281496800812 40.6750540874299 36.3405039629059  
39.3750969348308 38.3092241935352 40.547835538778 40.2669497398702  
STX2 101.211796615204 57.9038523094718 71.7336217321663 107.111886993156  
57.4622430729629 179.953662481428 42.0016830644258 66.6320017520888  
43.7052389230253 104.821285642918 96.981661155293 124.791747507205  
STX3 189.47090669378 254.023393889525 188.120766710975 271.813877560354  
343.828445728322 171.058650956601 648.885062676884 374.662462104111  
250.799060762208 284.868613843826 195.740109330843 295.312692092025  
STX4 337.084861453686 216.526205739151 380.278389209918 382.538365722661  
268.683528469759 234.727123301682 155.239308003808 276.214079735778  
164.435300801872 226.567000755017 206.649471678786 233.263058459431  
STX5 257.584248252408 238.746837986347 234.675357616705 363.67768546508  
330.096171705212 312.015358620043 396.493831159481 329.282615395786  
259.481036467571 305.279475274196 264.600870859012 258.038442651578  
STX6 228.254228465645 239.569514501529 359.940393399742 276.399037769005  
178.44531401852 143.749408328062 209.658186168638 144.239350177363  
298.54401957868 247.193935816149 219.64979849407 259.481036467571  
STX7 77.6056319020116 68.6518463768502 67.895735332714 115.221134337342  
54.5055246687169 101.968125485413 71.0369238830779 60.7942162859036  
55.898892031444 50.6486940895674 56.6884575165011 78.1623301184313  
STX8 103.139459009593 96.981661155293 112.328675926999 107.337113678019  
63.8315840603904 164.287737381703 103.913834330352 120.552647575158  
93.7090094630558 144.609635554528 126.682296930289 201.711142068161  
STXBP1 53.7141746468176 44.1634313979547 45.5587966941116  
49.1786207920603 50.5670783769975 78.0133696753253 46.3486551193976  
53.8803543493797 40.4544974307172 47.6810611485413 55.736748491876  
54.7953298048942  
STXBP2 271.961673480206 517.104607715151 537.213035625492  
609.243908604949 370.088974562672 137.286091889421 399.66182195331  
380.015934356432 446.37035118289 405.496884468464 454.185408362583  
269.963186760811  
STXBP3 119.502912878938 131.738693662183 161.974232441096  
145.391705645319 94.6432868887401 191.426587373391 128.966814822678  
112.021971795593 170.593589984253 93.0626550693989 156.08027400493  
168.91210897306  
STXBP4 54.8439819445945 51.9421032049606 50.9010149857308  
45.7397504535169 49.452985143568 60.4065050472082 52.0942589368478  
53.838484549134 55.9423752286714 56.4553747079294 52.5154971256566  
50.656598108034  
STXBP5 94.3674661847143 81.0331497830643 91.2769094348604  
133.1387411908 76.6914642534934 81.8426140611297 70.1184116246724  
118.341308125578 93.4180535865914 93.2226507128199 84.9601800557888  
79.3875629814087

STXBP6 43.7585538437696 43.3458769998118 46.3411353377615  
 48.2465811839557 48.7288537840562 161.439879456216 41.253645578517  
 47.3172462673426 80.6434122355417 88.3335649692467 171.386815652277  
 80.5388767883646  
 STYK1 45.7356815244513 47.015085768072 75.1477470681238 37.4642807402741  
 45.4751076037511 42.5660695551615 48.1747307200218 49.9332280449549  
 54.3458391089652 46.5650556481721 49.2879849674517 48.0350549043063  
 STYX 40.3478825593224 41.159706131351 44.5134109184888 43.074472921841  
 46.5557478175976 43.0177448037924 41.253645578517 38.6088282130727  
 40.6479758696144 43.9783383422823 41.9908237694988 37.1317006162938  
 STYXL1 318.234214341679 256.165801611585 275.026256072452  
 257.993462737264 233.232472394727 140.629562742418 224.412339736769  
 354.973265582488 441.5479786095 176.318618244066 190.993853866124  
 235.148436322043  
 SUB1 148.32293918881 92.1646038105091 136.766779297051 158.225884127529  
 79.9161139112432 181.420545696696 179.342338803631 225.420624458188  
 187.422036538629 133.192618821838 145.476204287528 169.554408876006  
 SUCLA2 151.55043196879 100.948192310983 143.461122605294  
 130.775349446374 119.72858253254 207.0155359394 99.0647786948132  
 86.6798536307388 141.370796803908 104.361353204648 123.868848519181  
 158.17598244564  
 SUCLG1 190.940906139713 337.156068385541 312.469507672374  
 283.88971280023 203.82788889213 371.513106715598 321.949943388959  
 294.567137562864 332.322497133752 311.241353755918 276.59189773139  
 352.600793906035  
 SUCLG2 113.704541686372 323.453481668415 211.596652798395  
 149.916892729626 188.943404504867 223.078923630983 182.885934774318  
 138.666805923912 190.993853866124 218.531478946522 192.666532389331  
 304.49707512712  
 SUCNR1 41.6354649482853 43.7644428186265 44.7829632472754  
 63.6334154351075 42.3685136297603 38.3418933808844 37.9430145836712  
 49.5185112777773 42.9020321355927 44.571915452417 38.745552403895  
 43.8575940017119  
 SUDS3 40.6559419616644 48.0296332183129 38.9790184198145 37.9875302985336  
 36.3390947880186 42.5660695551615 37.3799542961839 36.5393857306744  
 38.9834959368496 37.6383530120621 40.723990462047 41.9430737035925  
 SUFU 35.7012997405508 40.8880530359822 40.301483914446 35.8472302065546  
 40.5710637884029 40.7616966228404 51.0013344286851 43.1567024035183  
 44.619512785899 51.3351387089044 50.7903824729818 41.5536168238478  
 SUGT1 106.804269453898 82.0237575809051 72.7987593815919 112.368910939752  
 73.6965494979349 109.352296288717 106.712703356565 82.5170409503063  
 85.9087280306456 97.8915084053153 93.9018973330737 106.99628036922  
 SUGT1P 38.385865183581 35.7393138893354 33.4240466670776  
 34.6468794865286 35.3327761997046 36.1190722948669 44.3440839686558  
 40.831207953647 39.0775870687758 41.4397539024976 37.4642807402741  
 36.8690774823319  
 SULF1 1257.19844370057 277.367257933324 144.079981029616 593.345148568451  
 142.863673914134 195.836475280084 68.878562323012 125.013317684129  
 53.0357938671646 85.0218838801011 61.4121672148248 85.5175308034109  
 SULF2 203.010958724293 62.2483694996823 58.8936382809165 216.247225354243  
 68.5888253504788 74.7669841575348 66.1185883826035 71.3527183280827  
 51.0062122023297 69.5544840164738 66.3956936248447 65.0495374451854  
 SULT1A1 273.320144423733 169.459466601559 261.081844108932  
 287.981727851442 190.099949303905 145.526972410673 164.580141651883

326.250872625748 149.27230040094 307.264133974364 262.824698774297  
270.202959012185  
SULT1A2 59.3923286524971 52.5586058896479 71.787754116845  
41.4812544772644 55.3100442506299 50.1656162096553 43.2645805835667  
53.4109882045447 49.0593794153708 50.4234835272833 51.592378351965  
55.9249770393176  
SULT1A3 117.835389983392 93.6124140212565 158.590601962928  
100.654701845984 134.749803376372 75.057024942026 71.9124897002253  
137.935526876566 82.8150137756969 88.5274823465707 71.7167037224069  
84.7058085717914  
SULT1A4 137.955007835039 110.181320436731 139.778556493519  
85.4875375805171 135.973016473297 74.9006142438341 58.5087296620514  
101.120656274371 70.5699797830702 81.7699038961293 73.408861359425  
76.7137782332689  
SULT1B1 48.9906383294199 45.7317208802318 43.1931731665131  
47.2009420656854 42.0709558258414 44.5544727111028 44.0687697278114  
48.5681478665796 43.1805016690297 45.2556760873335 42.2618615571566  
39.5418280570561  
SULT1C2 39.9697332660833 39.0578297166485 45.3974838013476  
38.3668692419741 36.2048942610546 39.8455060654531 39.3585350448719  
42.8482181313226 46.824299585607 39.8873706855774 35.7953070087288  
49.3654837541353  
SULT1C3 41.4508241771315 46.4385386401326 42.157627240486  
43.074472921841 41.2740822675592 54.4753345912615 45.1017494688414  
42.0494116081998 43.6670755115848 48.9826868640753 40.0766543123257  
45.0985088502363  
SULT1C4 41.6354649482853 39.9697332660833 45.3974838013476  
39.7411455670172 40.8873907150245 42.6575535390785 34.5633623842083  
36.1375121409002 42.4540072551568 52.3304586399695 44.4688999098904  
43.9541718254769  
SULT1E1 37.3463875295726 36.6968906669565 36.2683886571585  
38.0958223740111 42.4864576619427 33.0463640202858 37.6036146841933  
41.9315419791594 37.8319142847141 41.3321861371202 33.2774014136617  
45.0035308952466  
SULT2A1 38.8561375693335 78.258486366912 48.1331309338997  
39.2780515621926 50.6470461863549 43.3785777889265 91.2330127140591  
61.2343203799193 62.370559099758 223.040734249612 260.964562714558  
43.7672102682067  
SULT2B1 82.9191817146388 55.1766423847208 53.6438003974874  
64.9725753882126 60.7000614972772 63.0324885262582 55.4004611309636  
58.6010484516703 80.4176406820326 59.0630473216622 55.8218917166321  
60.0219418084008  
SULT4A1 48.0570064280814 42.8542642792862 39.8299340037009  
44.3638402537972 50.8373208590626 41.6590564937735 34.8808316680227  
42.7965563818112 39.3750969348308 38.9207612933107 41.6336636285875  
40.716553247236  
SULT6B1 39.4710743516517 47.765848710116 40.931294690669  
44.265834798964 52.4370718282084 51.294537308199 49.6872467499977  
53.4109882045447 43.8482802038826 48.1392888470269 46.4205654140754  
44.0451487108213  
SUMF1 233.326886009799 229.26498093497 330.470972281607 189.035121001539  
140.853812988562 168.869258524932 245.356135592468 262.277293680018  
220.766843166754 287.363928615517 308.64836180781 177.535502927617

SUMF2 1057.44729389649 519.351335801817 841.316771679857 462.105603187328  
454.402224020514 443.269396125834 682.35345164708 753.976423227915  
897.198663109723 1236.32289322872 1114.15989325456 946.081492716653  
SUMO1 43.2135791259317 41.690833180291 46.1987217359283 41.3567204694281  
43.5836473788312 42.8598805316863 37.8877750141557 44.2527566343661  
41.4636047919453 44.6918600441328 45.2265319826548 45.7562276914441  
SUMO1P1 46.1513019317765 44.1239711172417 42.5406888281114  
70.7202372217584 40.9950639693255 42.4155142987678 42.9191764437547  
38.8159908342801 38.9496515344837 41.5804111566887 36.131485826118  
38.5921548841176  
SUMO1P3 79.105698465489 66.0147097736612 71.5062409407193  
73.0371862899659 83.764882413379 73.8105012820769 67.8233625051884  
90.0852769448901 89.3342384381684 61.141483572676 59.8070012006708  
83.247335725921  
SUMO2 359.082840694691 424.87896140215 362.123479430887 310.461601607662  
394.764369100963 442.99540222483 445.644244692294 277.367257933324  
408.991719312986 189.137593177772 230.486681581762 446.902178094675  
SUMO3 1232.7632290973 1618.92099084622 2201.39729904166 1045.20336057833  
3070.83113612925 1370.76188322111 1501.67042548971 1183.62228577053  
1726.90584784425 1270.49749036491 1118.62223628039 1055.69506483576  
SUMO4 43.7585538437696 36.6002100641539 38.4043916290561 38.2041059863839  
43.4544762830742 34.2773859804062 48.6395795163502 41.3506832276112  
40.9901805728485 39.0648733099061 45.2265319826548 38.8495095797881  
SUNC1 45.2421183842044 53.2841144999258 44.4311655729487 46.9778802368708  
47.6884372645373 42.5193208629123 50.6774883370457 49.2019743609873  
56.0496524902806 47.2299678280724 48.1591264215184 52.8974363028468  
SUOX 153.61084474789 133.96497573455 214.03015073442 108.589036223189  
129.394893423994 118.966448789057 179.767874494671 383.642090672435  
201.360008430353 281.774690337889 219.34503297115 175.529493306927  
SUPT16H 932.849256536912 497.591040004541 415.15150032168  
347.420750861056 464.209794165593 512.691506909762 442.080188140864  
375.354746298695 592.694479269186 664.453262499828 661.718946652592  
568.638529128128  
SUPT3H 53.7507429765038 57.8759339109109 59.3549213146532  
48.5921420121578 77.5698542248061 65.4643755537228 48.1747307200218  
51.4360013601805 67.8452645288969 59.6863210839828 59.4188882103773  
63.3974067065125  
SUPT4H1 297.475572902965 217.189489936251 185.658246392943  
295.473526251997 160.203825526096 320.086549121732 315.276749671783  
235.962209790392 272.198774144152 275.846698617064 250.832808506455  
189.950108471943  
SUPT5H 431.353025968649 236.440703574276 240.841214170409  
288.869882644391 344.314901683001 217.293240552946 387.039093527273  
554.551745559065 397.520960156896 474.155196153863 494.300858189605  
284.296510445032  
SUPT6H 63.2753814090696 74.6847594297153 69.4967762263181  
107.242476674629 73.6965494979349 93.748984888348 94.1289383735162  
106.654782265295 98.2512963929558 88.4385631861141 105.34055372228  
73.2234405348435  
SUPT7L 55.8218917166321 46.2286164776607 47.2962360458401  
43.9282059368202 45.1137938810047 48.9826868640753 56.4809146784765  
43.1567024035183 44.8997235283254 46.8954576545929 44.8872784170036  
48.3648494350286

SUPV3L1 188.485585236576 113.704541686372 105.052418151358  
 107.799236230743 216.63059645927 130.249044369793 185.618644212826  
 145.972133104142 263.387877739079 134.749803376372 112.428734515811  
 103.75895351937  
 SURF1 185.139615829489 300.121875447445 162.352052340273 231.333080775773  
 163.43197105141 249.729778471447 259.958369064691 211.451463038315  
 209.31241212773 219.616289279562 208.3497732496 268.072653271299  
 SURF2 57.50915811428 51.0175677516029 48.8100349749783 48.9944486068347  
 57.0504111569238 52.7156971154405 73.6855877240541 50.5070012045444  
 63.6222532132037 56.8201201798712 58.133863696399 53.0446815750355  
 SURF4 844.431085166353 651.621028098039 385.064309855006 545.827286197333  
 495.359878931451 411.582299081553 496.444080712528 363.269936098507  
 395.298033031033 367.235521372008 453.260719561292 367.451332073134  
 SURF6 416.246271724181 347.196922795214 170.829628173552 153.595112580363  
 354.015808474189 235.648018909 462.234151352018 410.257694738546  
 302.50850157207 316.185342210304 427.199940706169 327.455030020799  
 SUSD1 177.334352189317 223.1171195512 145.509901200987 256.426184741007  
 99.2341244350412 99.1667512831715 252.487015579489 234.946245049134  
 85.1114448808779 217.425223098994 193.897678586782 176.461729584652  
 SUSD2 152.441506175141 86.3374157614394 130.10148014895 103.734064904898  
 95.6182216943758 68.5457752893587 119.512426152446 98.0352049248004  
 54.0192060888782 62.3997407955361 71.751972433516 56.9379721393904  
 SUSD3 47.0940613507321 59.8102324370568 59.9690744676539 86.3663084195994  
 86.6854406823303 55.9351706773613 80.354283778818 58.0892402609917  
 55.9423752286714 45.6868589181768 46.0095710163378 49.9692385479389  
 SUSD4 46.8712941728147 51.2405397507224 41.9287023391451 37.4223289687135  
 46.807320159421 38.5707420487455 41.1886975241176 44.1311654985682  
 54.3458391089652 38.2069499294002 48.2910530887214 44.7871262003648  
 SUSD5 44.1294459089314 41.159706131351 42.640829914102 47.3574589211166  
 51.1368583672022 50.6360662655392 58.8993834673475 43.2551508830106  
 40.137818555383 44.0409178714232 41.2598458726002 43.2776458914333  
 SUV39H1 156.636360703756 211.926421068313 123.729687262037  
 87.114638423256 166.834334710682 101.540333720181 265.570814613305  
 192.632227878708 183.126129333645 116.22441634196 98.6706537801886  
 72.1090339831747  
 SUV39H2 54.4384603094793 54.0052948715814 53.8724557170772  
 61.7502624458447 53.4109882045447 52.3187919317561 60.7992483126292  
 57.9713749600418 54.4059109100338 60.1466326805616 63.2684764441521  
 55.6351010690528  
 SUV420H1 59.1311136551108 67.8208976798364 81.9218437790485  
 70.7202372217584 62.4267404482092 79.5619528847913 79.909124697198  
 63.955655956484 71.5327770882433 70.9702772728923 66.7759319948677  
 79.2525964926483  
 SUV420H2 41.2424637338424 40.716553247236 43.7630587657205  
 39.5050383901884 39.3667161654772 42.8598805316863 42.4939802311136  
 38.5457716679071 40.7847110517594 40.8970401536578 37.0180934800573  
 44.3521099857368  
 SUZ12 757.833254346899 953.143041145545 885.224377292125 995.397944432196  
 1273.52492984569 703.315796616275 1480.95754707554 1317.29255644089  
 1129.19103016599 731.071171171638 915.102542160713 674.270050283701  
 SUZ12P 42.2610433929745 44.0719548209593 43.8293212503587  
 42.6913548400127 42.1507521271384 40.6955669546739 44.8997235283255  
 43.1895053585771 41.6267998487951 41.5737994209465 44.8297355822444  
 41.526706795548



|        |                  |                  |                  |                  |
|--------|------------------|------------------|------------------|------------------|
| SV2A   | 40.0557788909923 | 46.4861258030402 | 41.3366779545815 | 39.7411455670172 |
|        | 47.3172462673426 | 36.9060997041453 | 50.8388984085636 | 53.5271601314404 |
|        | 46.1101825640108 | 42.6793753550854 | 48.3847843498476 | 44.5432192783161 |
| SV2B   | 38.5007204246293 | 38.9338521051669 | 31.5151915411476 | 44.265834798964  |
|        | 30.9891979286442 | 45.0882356578404 | 37.0564573649223 | 44.0390019242862 |
|        | 47.6195009345747 | 41.7405682794166 | 45.7328341667151 | 35.0222940937513 |
| SV2C   | 43.7585538437696 | 45.7979032939211 | 36.3604951341921 | 43.8002456102021 |
|        | 46.7508829977587 | 36.9060997041453 | 46.0228732507872 | 45.5581356216957 |
|        | 44.7058233759912 | 44.0409178714232 | 46.4205654140754 | 40.4639532172338 |
| SVEP1  | 331.885872312948 | 184.484466722861 | 45.4865173433646 | 152.545682001987 |
|        | 115.229070906222 | 792.022171185649 | 110.589130460258 | 98.6401096175932 |
|        | 75.1328739717464 | 364.337811621248 | 279.521995263196 | 223.267781866783 |
| SVIL   | 162.683322133983 | 106.226670314211 | 98.2843999216669 | 168.7696164772   |
|        | 135.889195284785 | 742.726253630865 | 151.55043196879  | 133.314819245044 |
|        | 115.801367301965 | 588.972273484465 | 540.721068846198 | 459.182372959714 |
| SVOP   | 37.3463875295726 | 46.3635803515159 | 42.3536549114165 | 40.0698728584484 |
|        | 45.3675390992851 | 50.5148383400703 | 41.4742337714895 | 42.0494116081998 |
|        | 38.7298222155532 | 42.0621425894624 | 41.8168470823451 | 41.6550823405646 |
| SVOPL  | 56.121460370892  | 38.9338521051669 | 38.9790184198145 | 36.5393857306744 |
|        | 44.9936360641969 | 47.4699236780425 | 50.6774883370457 | 50.3972033014227 |
|        | 42.5406888281114 | 42.3606390470387 | 42.911855821602  | 40.4639532172338 |
| SWAP70 | 177.261319004133 | 404.86512250958  | 427.363555286404 |                  |
|        | 421.791344753995 | 251.33720343548  | 226.35806628102  | 167.229755109155 |
|        | 225.300736968225 | 321.069136463599 | 330.241189572237 | 314.609371608151 |
|        | 441.5479786095   |                  |                  |                  |
| SYAP1  | 102.605473054584 | 75.2101993995344 | 85.7688374578353 | 138.895316905243 |
|        | 63.4753448572245 | 89.4111455826308 | 132.689951767479 | 138.910687241655 |
|        | 93.4180535865914 | 107.501868837432 | 99.6288131333575 | 97.2927456872797 |
| SYCE1  | 43.9309845324767 | 41.6799375298398 | 43.3523899508716 | 44.1144663373989 |
|        | 41.1568680200968 | 39.1650142708257 | 43.2706707408262 | 43.3262148375525 |
|        | 45.6582729799009 | 42.785429206422  | 41.3122147844752 | 40.2193186091351 |
| SYCN   | 39.6609238036815 | 37.5469247328848 | 40.931294690669  | 41.4273122914951 |
|        | 41.7929491793697 | 39.2985791324641 | 40.7910160811527 | 37.4484310268909 |
|        | 42.5406888281114 | 37.920964499903  | 41.0808257270221 | 41.1554481567603 |
| SYCP1  | 38.9229928131225 | 35.0797534809405 | 42.0621425894624 | 40.4967168818294 |
|        | 37.3785704939904 | 40.040778349137  | 37.5469247328848 | 39.7509165247419 |
|        | 41.2870505273664 | 39.2623423164488 | 41.134180463103  | 40.1235656101329 |
| SYCP2  | 45.0283997415478 | 45.9732108120834 | 44.7829632472754 | 41.5464765641928 |
|        | 41.9397336249742 | 43.3269087731399 | 47.7390230243778 | 41.7877325563821 |
|        | 45.0017158586743 | 42.5193208629123 | 42.5864346233886 | 47.3992733452821 |
| SYCP2L | 45.4799270968969 | 41.159706131351  | 43.9450023643394 |                  |
|        | 48.665578118898  | 47.2074332636566 | 42.6575535390785 | 42.7431359850339 |
|        | 45.1714698794331 | 41.074824727477  | 43.401782064778  | 46.0095710163378 |
|        | 46.3411353377615 |                  |                  |                  |
| SYCP3  | 45.3872406432794 | 43.5182502375207 | 45.3974838013476 | 46.1673159982664 |
|        | 41.9842695818285 | 42.9104454767916 | 44.7958122466628 | 43.3838505886856 |
|        | 43.9450023643394 | 44.8997235283254 | 44.1533327883807 | 42.6278608611758 |
| SYDE1  | 146.840603547323 | 80.9663216993544 | 68.7091708087448 | 96.7799695976296 |
|        | 92.5135737873857 | 155.541828028535 | 55.8019623191927 | 68.8058577447202 |
|        | 54.2825877218965 | 107.987729161223 | 119.070289990926 | 91.0346886951891 |
| SYDE2  | 49.540449125788  | 52.9603588177082 | 51.4308501933893 | 45.7397504535169 |
|        | 53.4109882045447 | 49.5424425850549 | 46.5650556481721 | 54.3820590274321 |
|        | 45.3756389170606 | 54.6089451252049 | 57.5430365699386 | 50.1579724208315 |

|         |                  |                  |                  |                  |
|---------|------------------|------------------|------------------|------------------|
| SYF2    | 248.390047812338 | 282.961489041903 | 344.314901683001 | 308.568617575909 |
|         | 269.284584971871 | 475.008345432596 | 290.546420262364 | 315.696895080135 |
|         | 314.856937113103 | 267.232315058148 | 258.726193861248 | 379.473739290565 |
| SYK     | 208.915145509698 | 223.826005691932 | 119.72858253254  | 646.791777335656 |
|         | 83.2652824564032 | 144.863548409034 | 265.176790020229 | 211.279069257808 |
|         | 130.832511095219 | 160.056757080676 | 185.54813083393  | 196.465477936749 |
| SYMPK   | 119.591054636527 | 80.4334958198115 | 89.4111455826308 | 96.3741876853801 |
|         | 122.642481894309 | 86.0630164348952 | 141.261334415286 | 185.563590013028 |
|         | 158.408644964483 | 130.477142940837 | 171.829798001437 | 106.425939266957 |
| SYN1    | 44.9210663878929 | 44.1634313979547 | 42.2054656733216 | 58.0218262176065 |
|         | 43.5880694884799 | 43.4290452504928 | 74.6572522248684 | 44.8997235283254 |
|         | 42.2136642947793 | 44.3124153157801 | 44.9977782988116 | 38.0931072228247 |
| SYN2    | 40.3478825593224 | 45.4882438975269 | 43.2721716572958 | 55.1240750633045 |
|         | 71.9124897002253 | 47.6803619768589 | 41.1507980856436 | 57.3837827230023 |
|         | 48.8524897151151 | 47.3791873993182 | 46.9919960628953 | 44.5432192783161 |
| SYN3    | 40.4179476219497 | 40.6380495994768 | 36.769073068743  | 41.3027031037343 |
|         | 37.1894304543751 | 45.7300501624017 | 45.3597029614942 | 40.931294690669  |
|         | 41.863927676552  | 39.3698811593364 | 43.9802831041664 | 43.0322714179517 |
| SYNC1   | 66.1229691315616 | 48.3699741879723 | 41.3366779545815 | 42.357910063876  |
|         | 41.0885562160946 | 109.352296288717 | 42.629412460409  | 41.2551966132486 |
|         | 43.0930293831497 | 52.4351670989268 | 57.8991270166934 | 72.4094549259929 |
| SYNCRIP | 331.001195453225 | 429.144004652368 | 341.078728185917 |                  |
|         | 296.333241199193 | 253.683753201667 | 274.994470779348 | 250.276530863694 |
|         | 238.246319539302 | 237.401487995882 | 146.389547177092 | 214.774035015293 |
|         | 211.390987205942 |                  |                  |                  |
| SYNE1   | 43.2724556187214 | 40.3384318592985 | 37.9003288112261 | 43.7303813515864 |
|         | 43.5118855690088 | 50.164201758929  | 40.9811982338594 | 43.9366081640576 |
|         | 41.134180463103  | 44.0719548209593 | 44.1533327883807 | 45.9693232070002 |
| SYNE2   | 57.8497388356952 | 55.1873115035779 | 47.3351267220029 | 45.9417195702176 |
|         | 47.3820775877441 | 53.1699994703719 | 61.130286531713  | 53.7848321213704 |
|         | 68.3324949971284 | 53.3343962424887 | 68.2372031645261 | 52.3242437351389 |
| SYNGAP1 | 34.9138625012006 | 36.9994058279362 | 42.3536549114165 |                  |
|         | 36.890925044696  | 43.1252272136667 | 43.2805590023412 | 36.9355798143571 |
|         | 39.1652965788406 | 38.6322728994674 | 42.6793753550854 | 42.0750889188255 |
|         | 41.863927676552  |                  |                  |                  |
| SYNGR1  | 48.1952521496489 | 55.6087710623795 | 64.3312319756553 |                  |
|         | 46.8153117531868 | 69.7413896580273 | 61.8571521441451 | 62.1566529063235 |
|         | 61.6395445916212 | 72.8306652548968 | 99.9951025176909 | 81.0562186907518 |
|         | 76.093116738739  |                  |                  |                  |
| SYNGR2  | 41.1523487516364 | 42.7775752471711 | 51.9885249508283 |                  |
|         | 42.6913548400127 | 40.9950639693255 | 44.3648993568405 | 45.4799270968969 |
|         | 45.1714698794331 | 47.0804681460898 | 38.528621456378  | 37.8372168909583 |
|         | 40.6614700944853 |                  |                  |                  |
| SYNGR3  | 40.6559419616644 | 47.3536182445315 | 39.3709357615493 |                  |
|         | 43.4410741327254 | 43.6587492470348 | 43.9724628401189 | 45.7452456977857 |
|         | 39.0620487644635 | 35.6139301508335 | 39.7835513496873 | 37.0180934800573 |
|         | 39.6352613956998 |                  |                  |                  |
| SYNGR4  | 64.668912004173  | 46.8954576545929 | 44.5134109184888 |                  |
|         | 44.1483976313959 | 46.6397391251762 | 41.2567470068038 | 45.1017494688414 |
|         | 38.2782436497441 | 37.1820543575123 | 39.2623423164488 | 39.5399188536544 |
|         | 43.3744503319109 |                  |                  |                  |
| SYNJ1   | 47.2862299990938 | 50.650011025454  | 53.0277416531043 | 60.5191033120783 |
|         | 46.8983071432587 | 55.7197525213035 | 49.8865955311391 | 45.5051950394186 |
|         | 51.1483696410762 | 56.921728372453  | 53.6572700211097 | 52.8796369426118 |

SYNJ2 70.3757673501097 66.7256057011273 57.9279989359711 55.2214187655851  
48.6224651100733 64.5187138759372 59.8273072817267 67.8061298261394  
56.1172088979505 56.5379973844443 56.6884575165011 70.0519247980052  
SYNJ2BP 140.598583034034 132.098298410135 229.512022912803  
203.559653641339 105.187381311145 351.239677010973 154.93193897888  
283.21175871127 107.309776354951 416.40156274382 505.911881145656  
389.583938820073  
SYNM 62.1013691632762 47.1856919329105 48.7646976789783 47.481302504066  
51.9885249508283 1201.00042684883 39.0788811357542 67.9667104519753  
44.8997235283254 958.473187253938 994.404707955031 805.309720893073  
SYNPO 41.7397731376692 35.8227939208521 44.4311655729487 35.1451084093692  
37.1565984182084 36.9060997041453 39.4600924554505 43.1567024035183  
40.6957787921451 41.6373771565199 40.4504608195666 45.2783024981315  
SYNPO2 42.0532901689036 43.4676090278982 44.9126614290929  
47.5686212992496 43.8928917835793 321.26586939039 43.7558484398413  
45.5817423968206 44.6581444601181 93.3418050966934 131.097521229971  
170.450752247109  
SYNPO2L 42.2455707947223 39.8695929627783 38.8775560911841  
45.334106390212 38.6454098044474 37.3799542961839 42.357910063876  
40.931294690669 38.2215591930186 36.2435874904689 40.2649309204478  
34.4570158133896  
SYNPR 35.2267149016596 39.7835513496873 38.0452862258803 36.6501141438378  
40.5710637884029 40.4359177791566 38.4005795891396 33.2467975244196  
35.5220586859301 35.6208308220005 36.2435874904689 36.5474283500601  
SYP 42.2455707947223 32.8881500803623 40.1985790927248 43.8002456102021  
51.940083408061 43.4681646416585 43.0930293831497 42.7431359850339  
37.8319142847141 49.4006068471301 47.0110068985119 42.7782216342806  
SYPL1 158.25602438933 411.114836576804 547.072513229674 182.601427407211  
327.455030020799 235.925374041038 203.913062066149 189.865569826568  
663.372296297652 253.010885406317 348.862367731887 516.349618186681  
SYPL2 35.2267149016596 40.4359177791566 39.8299340037009 40.7481155008596  
39.9697332660833 46.0364000143537 50.5252048155459 34.9580369221164  
38.8271346375425 39.8873706855774 42.8263096141654 36.6603338274678  
SYS1 138.910687241655 101.020328028769 85.8059456975413 200.401133392259  
106.125117937458 132.518188482163 98.2843999216669 124.409631245033  
138.036631806718 161.588263691127 145.476204287528 143.331212964837  
SYT1 43.2724556187214 63.0670482657086 42.3536549114165 46.0228732507872  
46.3150221024046 50.3245489035833 55.0897019602305 43.4544762830742  
94.7110944331075 47.0055981216687 47.5439485437351 42.357910063876  
SYT10 35.2267149016596 36.89524015739 43.4709415392696 43.4410741327254  
36.6354013629791 39.4953494583071 44.4639405506967 37.7612949798895  
43.5669306063196 36.1550293353654 33.6080693875435 34.9138625012006  
SYT11 196.760671234837 207.833867050257 200.958421322871 419.182443507848  
153.237127853072 430.743220222202 141.396509967298 137.720182545143  
51.0062122023297 229.792906003602 234.615033303459 241.952522667413  
SYT12 52.5792653122861 44.4411734611229 38.0452862258803 41.7614975630362  
44.3557408297309 40.040778349137 61.3620062177524 46.3685439301234  
50.1603795873336 43.6033221838149 46.972521499515 45.8546719310325  
SYT13 36.9060997041453 40.7952353240579 44.7829632472754 37.5382094267692  
38.2496050953547 45.0882356578404 44.3440839686558 73.9624143741222  
41.1742244762318 36.8059561571675 42.4580504587581 49.3087627580849  
SYT14 43.6706764143908 43.3458769998118 41.8751578329365 43.9282059368202  
50.8875036861067 40.5281496800812 41.0381860307445 50.628152951493  
51.1055541075029 42.785429206422 46.1673159982664 40.5703581862752

|       |                  |                  |                  |                  |
|-------|------------------|------------------|------------------|------------------|
| SYT15 | 52.8928296360463 | 55.4919197421746 | 78.5325880060762 | 63.7417623042104 |
|       | 53.1278271804774 | 62.0660509811111 | 52.7647742101033 | 67.0904616289706 |
|       | 51.9545473262296 | 68.3419511055057 | 72.3388488936832 | 67.6625413926778 |
| SYT16 | 39.1590964332473 | 39.8695929627783 | 39.3709357615493 | 31.8431345631453 |
|       | 39.2608760193011 | 37.7000400506818 | 38.0598374201407 | 39.7509165247419 |
|       | 43.9450023643394 | 37.7315666632629 | 42.8263096141654 | 40.1700117452801 |
| SYT17 | 45.0985088502363 | 62.3102413989199 | 163.280931300437 | 38.3166554965434 |
|       | 51.1368583672022 | 49.4157684139858 | 70.8835636550472 | 72.2610650652674 |
|       | 106.219480656782 | 155.855834721836 | 150.362006499825 | 135.012695962236 |
| SYT2  | 43.0930293831497 | 40.148780650831  | 36.3604951341921 | 36.6501141438378 |
|       | 35.5220586859301 | 36.8059561571675 | 33.8558232866797 | 33.1477313087177 |
|       | 41.5635499110307 | 31.7992509287736 | 36.131485826118  | 37.4554876386402 |
| SYT3  | 42.8036731479932 | 41.8848959280916 | 51.1347974668251 | 42.4580504587581 |
|       | 40.6723334103791 | 41.159706131351  | 40.4359177791566 | 38.8495095797881 |
|       | 41.863927676552  | 41.8613406887824 | 47.0110068985119 | 41.0657892043496 |
| SYT4  | 38.7537364570873 | 36.89524015739   | 34.806104801006  | 48.1662933382789 |
|       | 32.5318884330468 | 37.2686490268265 | 36.08956004634   | 40.7311497914871 |
|       | 40.6957787921451 | 35.4990901121893 | 47.4630625313159 | 39.6352613956998 |
| SYT5  | 37.2474303302343 | 40.8880530359822 | 41.437237454134  | 38.8495095797881 |
|       | 44.147557390293  | 40.650742261428  | 34.9344532055397 | 41.1575777497576 |
|       | 41.4636047919453 | 40.2112371512838 | 41.8168470823451 | 42.57175366709   |
| SYT6  | 43.3638918705225 | 44.2105195734073 | 46.1653991089885 | 44.550322123994  |
|       | 43.844855336215  | 40.4359177791566 | 42.1607322031054 | 46.8954576545929 |
|       | 38.3418933808844 | 45.4614234442527 | 43.4709415392696 | 40.7704587752083 |
| SYT7  | 56.7754260322383 | 52.502055890816  | 41.8324218474555 | 40.8135175201235 |
|       | 64.6996384732208 | 41.2176232897704 | 55.6468702656652 | 58.47356854625   |
|       | 45.6129956328415 | 46.7157196805535 | 44.5258896753408 | 43.2098046633648 |
| SYT8  | 150.685575301101 | 388.132295362791 | 1364.06060391538 | 47.0874209746031 |
|       | 55.0031529299037 | 55.8243694410835 | 56.9320717885002 | 51.6660481331154 |
|       | 131.824854999638 | 588.736435715365 | 439.376432049616 | 194.570513601724 |
| SYT9  | 41.8409927585705 | 40.4359177791566 | 54.7855575216687 | 39.3750969348308 |
|       | 41.3755760434934 | 43.7630587657205 | 42.4939802311136 | 43.0390857698452 |
|       | 45.1899271235974 | 40.3235655331796 | 46.4205654140754 | 47.3172462673426 |
| SYTL1 | 76.2368668439875 | 352.339572553069 | 636.367246129079 | 108.025082988807 |
|       | 186.395673402867 | 57.4777075615651 | 97.8309399470621 | 74.383456365584  |
|       | 395.634889855838 | 257.662291702982 | 260.279110870904 | 175.876518898179 |
| SYTL2 | 185.360921731157 | 104.232196493024 | 115.044790975532 | 74.2429851177794 |
|       | 108.928854330744 | 71.2324892408462 | 49.4456171013459 | 96.3741876853801 |
|       | 88.8330881965986 | 128.126336084436 | 163.405230398941 | 120.618530729822 |
| SYTL3 | 92.843017373656  | 52.0268699306396 | 68.8098607236981 | 180.222765336208 |
|       | 51.5888395924843 | 111.404796541459 | 65.644767142472  | 76.6094442444074 |
|       | 65.2881198932621 | 89.5597629049747 | 97.1271615802556 | 79.5898953726467 |
| SYTL4 | 107.836867810972 | 198.922575188741 | 101.403739410832 | 77.0774476767901 |
|       | 57.8039717833131 | 112.984042589704 | 132.689951767479 | 138.972884942374 |
|       | 194.703024752864 | 194.60733564068  | 140.063595285844 | 186.042094228091 |
| SYTL5 | 45.1912496459517 | 44.8529259387308 | 41.8751578329365 | 36.890925044696  |
|       | 39.859345745831  | 38.8336427948187 | 45.4799270968969 | 38.2782436497441 |
|       | 49.4786466722535 | 44.2580151149956 | 40.9157352260901 | 43.1805016690297 |
| SYVN1 | 94.312912693545  | 154.93193897888  | 151.960017107922 | 206.481424743576 |
|       | 223.801865347687 | 125.061012833314 | 128.256151920468 | 118.993842599424 |
|       | 139.45393201022  | 116.839274984089 | 118.251739134889 | 114.719721626067 |
| T     | 38.3459820930759 | 39.1539892144371 | 40.8420925848403 | 39.3750969348308 |
|       | 39.2839132447749 | 40.1428591998404 | 38.6537063231682 | 39.5954353681031 |
|       | 40.4220196471124 | 35.5723224447141 | 38.3166554965434 | 37.3057614736707 |

|         |                  |                  |                  |                  |
|---------|------------------|------------------|------------------|------------------|
| T1560   | 39.266565827316  | 36.6002100641539 | 40.6737160001291 | 39.7411455670172 |
|         | 47.6884372645373 | 39.132725377815  | 44.7255207589606 | 42.7431359850339 |
|         | 53.838484549134  | 41.0057887014368 | 37.3687900733549 | 35.7451401627836 |
| TAAR1   | 42.8036731479932 | 38.6704566269103 | 41.785676764591  | 40.1804147506786 |
|         | 44.4031868028216 | 43.3785777889265 | 43.8835874380262 | 40.4669141685209 |
|         | 44.293922970134  | 42.6366765186182 | 41.6336636285875 | 46.7182294568603 |
| TAAR2   | 48.4849194706125 | 44.6918600441328 | 50.9010149857308 | 44.1483976313959 |
|         | 36.4434672195785 | 39.8455060654531 | 41.3594868055879 | 45.0972184964705 |
|         | 42.5406888281114 | 46.5650556481721 | 38.6662194645633 | 32.8921051249019 |
| TAAR5   | 42.0532901689036 | 36.6968906669565 | 41.2365089689635 | 40.9607305725196 |
|         | 35.5220586859301 | 35.9305494063137 | 40.5585676679482 | 40.4359177791566 |
|         | 36.9060997041453 | 39.8873706855774 | 44.0409178714232 | 43.6753843488695 |
| TAAR6   | 43.1805016690297 | 39.9697332660833 | 39.6451483836089 | 43.6726153508978 |
|         | 49.8304479381623 | 43.0860383229288 | 44.3440839686558 | 42.157627240486  |
|         | 42.7150227340364 | 38.8507804383261 | 43.0971787292711 | 40.6614700944853 |
| TAAR8   | 43.3638918705225 | 42.5269793679335 | 32.8745892439217 | 46.1673159982664 |
|         | 36.08956004634   | 38.1169703906207 | 34.0777108441756 | 40.3357777530419 |
|         | 42.8036731479932 | 41.9666541498638 | 45.7328341667151 | 40.7704587752083 |
| TAAR9   | 37.7384958256497 | 40.8880530359822 | 39.3709357615493 | 39.3750969348308 |
|         | 42.9090346219023 | 40.7616966228404 | 41.0381860307445 | 37.5511560880902 |
|         | 43.6670755115848 | 42.785429206422  | 44.2925355984056 | 41.0657892043496 |
| TAC1    | 37.2865372090014 | 37.5469247328848 | 42.1204847421254 | 40.4359177791566 |
|         | 42.9775348174342 | 38.4330755397458 | 48.4859552186772 | 38.1362994712477 |
|         | 39.8763736543526 | 39.5247003943252 | 39.9519547348106 | 40.8254641406268 |
| TAC3    | 44.5732978059923 | 167.095818680513 | 42.0621425894624 | 38.3166554965434 |
|         | 98.0143500562821 | 47.0352668572435 | 56.0121021290387 | 44.7470332010482 |
|         | 44.2222841572272 | 50.7855742231932 | 88.9321928608078 | 41.5230459979285 |
| TAC4    | 43.4100411978366 | 42.9358255168086 | 41.6977706798234 | 41.8291484190524 |
|         | 40.2449343247539 | 41.7627910693483 | 42.7065584433947 | 45.3389970694851 |
|         | 41.5635499110307 | 42.3413611855132 | 41.9083581529276 | 36.064718696392  |
| TACC1   | 1055.00793806075 | 1115.27580736237 | 775.723255259499 | 1130.2486883492  |
|         | 946.081492716653 | 3391.65926812276 | 1280.77934331703 | 1645.71527614542 |
|         | 557.455966274117 | 2013.08489754172 | 2323.81110653289 | 1497.73669971925 |
| TACC2   | 113.583259458107 | 128.996351661564 | 149.5664106654   | 50.2163892855092 |
|         | 109.481322353402 | 274.493399403322 | 92.1817062395346 | 129.747577660612 |
|         | 90.0852769448901 | 248.414210905199 | 249.729778471447 | 203.228211195516 |
| TACC3   | 80.2650269182886 | 106.8866235778   | 73.3448790478335 | 97.4967204298499 |
|         | 113.612874206329 | 58.2531879680192 | 169.527304857688 | 105.474920850981 |
|         | 134.968128884298 | 41.2276963324981 | 51.9302027391447 | 44.4475838947656 |
| TACR1   | 40.8028707756596 | 40.5400384479766 | 41.4534762662066 | 40.8681871019812 |
|         | 39.8167055578918 | 41.400731343457  | 39.0831492773955 | 44.8643898647322 |
|         | 42.5880983514685 | 40.6022003765153 | 41.3553369544097 | 41.1554481567603 |
| TACR2   | 38.5648843914189 | 36.4002279956519 | 44.0451487108213 | 44.265834798964  |
|         | 38.1644569189523 | 71.8466937395628 | 43.4544762830742 | 41.8417024632349 |
|         | 53.3094843669564 | 77.4046818339539 | 129.592927998658 | 48.7814131120945 |
| TACR3   | 43.3638918705225 | 40.6380495994768 | 43.401782064778  | 44.7980740332174 |
|         | 44.6834648302383 | 43.9724628401189 | 54.0170817319522 | 42.6450179841129 |
|         | 45.4799270968969 | 46.8954576545929 | 45.390192977585  | 48.7814131120945 |
| TACSTD1 | 2083.69812106867 | 821.013687795434 | 166.129723762515 |                  |
|         | 61.3747706295648 | 858.975085087497 | 112.421316052392 | 1301.07436212673 |
|         | 1141.96316762335 | 625.435083064752 | 157.592292551459 | 225.300736968225 |
|         | 441.872082665398 |                  |                  |                  |
| TACSTD2 | 1607.73526966988 | 4820.70258471362 | 2678.43227619157 |                  |
|         | 193.60925192949  | 1731.19220270448 | 363.67768546508  | 1925.20977162704 |

2745.8277126123 5438.34345794521 2300.20602168385 2545.03032507597  
 2911.10227993347  
 TADA1L 83.2737524877952 91.0952554578659 101.494432845825  
 65.3191216270241 150.572774995368 74.8170892324966 113.866742186841  
 74.1425714439424 100.745154926774 69.6511571901941 75.6883778954949  
 87.6598268114592  
 TADA2L 43.3085358214154 47.2770121962655 45.5883690965192  
 41.0726336841311 45.5051950394186 42.0082685530808 45.656343062947  
 45.3872406432794 53.1613811648611 40.4488698263442 41.6724739851995  
 45.7258895124195  
 TADA3L 78.0020909283414 88.7235007297899 83.7829283976292  
 88.1494891612632 90.1430468048409 84.511841810844 96.8141712830545  
 100.499763255098 93.9756797434207 81.3696465421645 78.6402083787251  
 71.0820747228972  
 TAF1 41.2773842727759 45.7979032939211 48.8623729374733 43.2551508830106  
 46.5557478175976 51.6053353177789 42.9803717121865 42.2577689927563  
 54.4618827096129 43.128936937037 45.5707650534259 46.917149434588  
 TAF10 349.030389220324 635.52621743309 602.441843384617 508.581400606496  
 484.651969259966 448.787414220553 503.187121806288 350.796638646601  
 550.642253702646 391.292537565032 401.403103922907 334.583159766096  
 TAF11 41.6354649482853 46.0023068797812 38.7745734037492 42.9358255168086  
 49.9493230064613 38.7340969861754 45.4799270968969 43.0390857698452  
 45.8325181856483 46.325232414659 43.5710871617107 40.1700117452801  
 TAF12 144.976378707447 112.854520785284 126.319731178054 177.985573759136  
 175.708718617578 184.701183332784 130.313381811168 165.640362974584  
 125.946162432491 110.909109947659 108.246687420741 153.42135363926  
 TAF13 47.4678477186801 47.015085768072 48.7039705048129 53.8732900241064  
 41.4397539024976 47.4699236780425 49.9085372049438 46.7980335276155  
 45.7452456977857 44.0719548209593 47.481302504066 53.4735821194294  
 TAF15 248.194954741095 347.003621791919 300.412043023998 206.791464145857  
 544.946796643478 334.639325701194 582.017297217368 507.620619345969  
 456.467726693355 354.861943266984 413.620123676085 410.157894910571  
 TAF1A 48.4614401417022 49.4067286971348 51.255153062608 45.2640606138546  
 54.3116862772198 51.8103411703261 45.4365580679461 47.0239604970019  
 51.2378476933237 44.0578434007778 46.3563690926644 49.9692385479389  
 TAF1B 140.719373122712 87.5666652975503 87.8170592981737 88.6287852712744  
 112.000099082544 79.0249585610565 89.1012752492647 127.961989181945  
 90.8492959457035 68.9562915755919 76.2226219333049 86.8994288019115  
 TAF1C 277.367257933324 236.536058101486 359.296873000994 138.81810375553  
 197.895987726243 132.799542377892 229.881790983135 194.355765743782  
 180.100430567626 216.654612568853 190.77754486426 153.279284223069  
 TAF1L 63.8626921347231 66.8026147385682 75.4317740345967 70.2541961995753  
 78.6286416672119 81.0880833950735 75.8779316255794 78.6911549149983  
 81.0169370911764 64.428683021978 70.7760293129408 71.6502000742477  
 TAF2 155.872353189452 225.460800739619 135.226924329183 113.102823481296  
 163.809567262808 138.703293882141 97.0155195562193 82.4414994502172  
 136.004535901075 64.428683021978 82.6116645182046 128.873145026756  
 TAF3 38.9229928131225 43.683792219729 44.7255207589606 44.0451487108213  
 40.8873907150245 43.0860383229288 44.0202052410607 45.063792968927  
 41.7627910693483 41.1222709786153 42.7775752471711 44.7401523707775  
 TAF4 178.269900400454 267.066062068411 217.263889616995 142.309369995384  
 372.131471268346 156.445000453282 260.581111456578 135.997802304719  
 258.657801126493 189.245501343165 198.872002827342 230.09336914921

|        |                  |                  |                  |                  |
|--------|------------------|------------------|------------------|------------------|
| TAF4B  | 41.1523487516364 | 47.765848710116  | 45.310660704531  | 47.3574589211166 |
|        | 44.9936360641969 | 46.263826584899  | 45.3597029614942 | 42.2577689927563 |
|        | 41.7627910693483 | 42.2614524730856 | 41.7272875295469 | 45.5800840647989 |
| TAF5   | 65.4561038762234 | 75.4732674021193 | 54.2670850492947 | 83.2925226467532 |
|        | 97.5394336319916 | 84.9099930524863 | 84.7782034884529 | 64.2174369755376 |
|        | 68.75304552302   | 72.2443746456494 | 65.9273663561152 | 71.2491135258076 |
| TAF5L  | 39.0237504776589 | 45.6948619492056 | 41.528370959196  | 42.281606728072  |
|        | 42.6022652963326 | 41.8613406887824 | 43.6753843488695 | 42.9887069977696 |
|        | 43.0456011922275 | 42.6366765186182 | 42.9634662926872 | 45.7206695113999 |
| TAF6   | 73.7800733276454 | 66.1288889125299 | 69.7855392178808 | 53.4785152499923 |
|        | 74.1686961093736 | 92.8644908993284 | 92.6545309624315 | 75.656434170689  |
|        | 102.282066142307 | 70.9702772728923 | 87.8260173707897 | 69.7644070698124 |
| TAF6L  | 236.374695859748 | 296.176349059192 | 257.325282051981 | 174.860894067053 |
|        | 373.330920144642 | 190.647389246848 | 436.757445186987 | 265.790391813663 |
|        | 303.281551940647 | 272.930242946726 | 311.810240385503 | 151.344720108793 |
| TAF7   | 161.25239489071  | 117.706922397135 | 138.81810375553  | 202.360546931172 |
|        | 111.669813610213 | 178.269900400454 | 124.252483407658 | 128.996351661564 |
|        | 188.36429659391  | 117.502489192855 | 118.854313907627 | 164.047379890821 |
| TAF7L  | 37.1485601150873 | 38.7344853699576 | 40.8420925848403 | 39.1706564265495 |
|        | 43.844855336215  | 35.314469458379  | 46.4388841354122 | 44.4031868028216 |
|        | 36.6312676076142 | 34.9138625012006 | 44.4688999098904 | 36.3454320848591 |
| TAF8   | 32.2133093774284 | 34.15544299189   | 40.5734458834617 | 38.0958223740111 |
|        | 37.5556299264699 | 46.0364000143537 | 42.0605906240248 | 38.8495095797881 |
|        | 39.6609238036815 | 35.6208308220005 | 35.6970528713709 | 44.8372404608604 |
| TAF9   | 47.2218282357336 | 46.7279104095328 | 47.8263530599296 | 41.1493778437527 |
|        | 44.915045386675  | 45.4607426241257 | 38.5474297403025 | 42.6022652963326 |
|        | 49.6144181894187 | 42.4594149893798 | 39.6833800000587 | 64.531467526747  |
| TAF9B  | 41.2424637338424 | 35.1224289925572 | 41.3366779545815 | 42.6913548400127 |
|        | 40.5710637884029 | 41.4508241771315 | 38.6243997507646 | 41.2551966132486 |
|        | 38.2215591930186 | 35.0668743708816 | 35.6041926503637 | 34.4570158133896 |
| TAF9L  | 49.6241203903354 | 55.9269493191353 | 54.4384603094793 | 54.2886483704949 |
|        | 46.4343327861696 | 96.2490896573253 | 59.8273072817267 | 64.6316818494785 |
|        | 68.4720753153522 | 47.2299678280724 | 71.6849360818041 | 78.3467096982408 |
| TAGAP  | 45.5936699846945 | 60.5025831340513 | 55.9189792122268 | 407.949645788215 |
|        | 39.2893450513348 | 45.0298096327499 | 95.8446272966902 | 47.7390230243778 |
|        | 43.515290338756  | 41.2276963324981 | 38.9087995969091 | 40.4639532172338 |
| TAGLN  | 2697.96877833185 | 898.114119553014 | 666.816487335088 | 1017.1803754111  |
|        | 731.670315613547 | 5811.22276358172 | 120.123385036416 | 905.76958446454  |
|        | 124.76401857899  | 5354.58328030315 | 4344.25847766877 | 6606.35767508139 |
| TAGLN2 | 1065.70206468134 | 1139.81870068001 | 2138.23653387331 |                  |
|        | 1342.10592868516 | 1493.20520979227 | 1057.44729389649 | 2083.69812106867 |
|        | 1048.98028527123 | 2306.14613042834 | 827.365231733511 | 710.579735673002 |
|        | 915.936211119242 |                  |                  |                  |
| TAGLN3 | 41.5421429082231 | 42.4493032770053 | 39.2388980107385 |                  |
|        | 40.0322420615846 | 41.2424637338424 | 41.7256940298128 | 45.7452456977857 |
|        | 43.6434576713809 | 44.0202052410607 | 41.4659679379482 | 41.9908237694988 |
|        | 42.1537476443423 |                  |                  |                  |
| tAKR   | 40.5654775358427 | 40.0984333134909 | 42.281606728072  | 37.9875302985336 |
|        | 40.4166536885831 | 39.4953494583071 | 40.7376840028647 | 39.5083491499018 |
|        | 45.9732108120834 | 42.1317134987795 | 41.2598458726002 | 45.0035308952466 |
| TAL1   | 38.1169703906207 | 44.4411734611229 | 34.6977013306396 | 30.4430902995779 |
|        | 43.3332476888305 | 28.6786952763294 | 41.253645578517  | 37.6557714476853 |
|        | 38.2215591930186 | 44.2580151149956 | 41.0808257270221 | 42.357910063876  |

|        |                  |                  |                  |                  |
|--------|------------------|------------------|------------------|------------------|
| TAL2   | 33.0463640202858 | 36.2103905554984 | 38.5045333213784 | 39.066284740632  |
|        | 37.7576900881741 | 37.4782441311626 | 36.634024014558  | 30.7606118575469 |
|        | 34.5633623842083 | 46.7646877499666 | 34.8383995317036 | 44.0451487108213 |
| TALDO1 | 523.25106120389  | 1224.80240464583 | 929.862002014478 |                  |
|        | 1164.71243740122 | 931.401929277001 | 810.201903561366 | 1047.33749100342 |
|        | 913.704049709264 | 1046.8806020631  | 641.837188326604 | 782.639346040155 |
|        | 994.404707955031 |                  |                  |                  |
| TANC1  | 127.836645375421 | 103.289476128549 | 122.748811531184 | 82.0292880742189 |
|        | 160.566474370004 | 120.980558571109 | 98.8657527308305 | 97.3443444704601 |
|        | 105.036862798568 | 114.972374827795 | 142.515628954457 | 143.517244617936 |
| TANK   | 51.8781065691038 | 65.8703820581684 | 67.1926218405833 | 124.214669663291 |
|        | 50.0173461659833 | 74.9541456286637 | 53.3876505193499 | 44.8727287473605 |
|        | 53.8658229797154 | 59.4969799685856 | 64.830448408529  | 77.1954301283261 |
| TAOK1  | 59.7179445506128 | 67.6169355376864 | 72.0243286940589 | 111.803238196297 |
|        | 62.3233491851723 | 71.1607965028029 | 71.5249259772583 | 106.067766766889 |
|        | 71.6573554353691 | 66.274247400793  | 80.9821967801845 | 69.7644070698124 |
| TAOK2  | 66.9119713241466 | 53.4109882045447 | 62.6817751015639 | 64.3117498829777 |
|        | 77.1287755867582 | 57.8944021095265 | 59.3549213146532 | 90.6805895192707 |
|        | 54.326258679842  | 68.3234331335073 | 68.4659783447092 | 56.7711602236706 |
| TAOK3  | 39.1590964332473 | 41.159706131351  | 35.2101597814352 | 37.9875302985336 |
|        | 41.5668884168669 | 35.314469458379  | 40.0052661202207 | 36.7460922671619 |
|        | 32.7294532998931 | 34.9138625012006 | 36.8282383070068 | 32.6203270051744 |
| TAP1   | 1132.19026676901 | 1956.75875151802 | 1129.19103016599 | 2456.86796652313 |
|        | 248.414210905199 | 375.036941898486 | 1598.78859278229 | 792.880882528835 |
|        | 645.702744916884 | 389.994289973076 | 740.423874031773 | 377.409970666607 |
| TAP2   | 102.899135663993 | 151.047739254277 | 97.9675668521083 | 143.13189461696  |
|        | 70.506090074243  | 66.6702048178108 | 87.8746766762445 | 72.121833189378  |
|        | 112.900479809091 | 49.5265949137207 | 61.7191344476295 | 57.3257175460048 |
| TAPBP  | 445.016226732679 | 439.376432049616 | 522.49156295512  | 546.287195443189 |
|        | 240.841214170409 | 173.856274004533 | 376.289659542649 | 303.93332785291  |
|        | 546.80979198725  | 366.129480083279 | 381.871660734831 | 248.194954741095 |
| TAPBPL | 90.5503099572843 | 79.6516904169771 | 131.517202728816 |                  |
|        | 106.582060920252 | 55.1563703466328 | 68.839885767937  | 75.4053820110486 |
|        | 56.3560498705517 | 103.767582317247 | 119.301672388541 | 79.5743379965984 |
|        | 73.845912534353  |                  |                  |                  |
| TAPT1  | 53.4921736109774 | 62.9904770954043 | 53.0104469636221 | 60.4646208319121 |
|        | 48.9627346956003 | 70.5025097213784 | 67.0455170947389 | 52.7787010032051 |
|        | 66.0350709576651 | 78.5141640924736 | 75.9802606133139 | 70.8546350449171 |
| TARBP1 | 110.048921728774 | 80.3676231413295 | 126.711833914667 |                  |
|        | 90.0942781313264 | 137.878417253635 | 101.020328028769 | 84.7782034884529 |
|        | 115.052948380817 | 100.076931518374 | 80.191847692094  | 77.4625808567081 |
|        | 97.4709987978999 |                  |                  |                  |
| TARBP2 | 144.063191647372 | 154.612425659555 | 191.668846959973 |                  |
|        | 107.906865732219 | 142.614006543733 | 89.8567957512307 | 127.352997770688 |
|        | 147.115466503902 | 171.938863440177 | 108.486774731927 | 119.528720998614 |
|        | 85.0113628886031 |                  |                  |                  |
| TARDBP | 58.1027665533767 | 55.1766423847208 | 56.6888826857797 |                  |
|        | 52.6947911480086 | 60.9710783023013 | 68.7342341724306 | 52.4111687156893 |
|        | 49.5185112777773 | 47.0804681460898 | 77.1767494799711 | 60.7516146716018 |
|        | 58.2879293130296 |                  |                  |                  |
| TARP   | 36.9060997041453 | 39.0102066700839 | 41.2365089689635 | 91.5202521578181 |
|        | 39.9697332660833 | 35.5158505219112 | 38.8417151851134 | 41.9315419791594 |
|        | 34.6720534245631 | 42.6793753550854 | 53.3078448066074 | 42.7782216342806 |



TARS 200.351560652506 203.228211195516 113.6408244935 235.075347885884  
175.529493306927 182.079641528208 344.314901683001 306.234270542664  
225.420624458188 114.136234102574 111.42402759245 142.417106615034  
TARS2 61.7551416187554 54.4793574349739 91.9375312869437 57.6511495792664  
95.2833228196616 55.0009147092272 71.9474405671289 82.7269382676336  
68.1674425673171 60.399253022569 69.8899273527731 58.9836017745712  
TARS2L2 53.8856501960117 48.275452803061 49.7350276169552  
52.1201052574162 41.0885562160946 60.9822577063534 46.0228732507872  
46.7980335276155 45.3756389170606 59.9354531144375 53.6334631215581  
53.3904307221902  
TAS1R1 41.187562301961 39.2907645923217 36.2294700257801  
41.1493778437527 42.1650127805175 41.1090481599939 40.2154497375715  
39.3709357615493 40.0870341983328 39.7411455670172 41.0808257270221  
37.3600014814388  
TAS1R2 38.2083710281545 40.5400384479766 40.8420925848403  
45.8102081251786 37.9116800161496 38.3418933808844 40.0603121770344  
42.7431359850339 41.4397539024976 44.571915452417 44.553780984244  
42.8864415494484  
TAS1R3 40.5654775358427 32.7800533388945 34.9849896310235  
39.5050383901884 45.3675390992851 39.0266821712099 41.9393838138203  
37.5511560880902 41.1742244762318 42.8936990772838 41.9908237694988  
35.6427313468066  
TAS2R1 41.4508241771315 36.6968906669565 43.7630587657205  
47.0874209746031 68.0414563597154 42.750861693377 43.9450023643394  
41.9315419791594 39.3750969348308 41.0057887014368 38.4689132737495  
37.5556299264699  
TAS2R10 43.3638918705225 40.7952353240579 37.8386378737561  
58.3475983630509 39.6535880152834 44.7804080899431 49.2546642180676  
39.3709357615493 47.1744296124496 46.8954576545929 41.1638563416981  
44.3521099857368  
TAS2R13 34.5886782974123 37.3634897565502 38.6005272730664  
41.3027031037343 39.3667161654772 35.7034203372528 39.7576136507593  
38.2782436497441 38.1169703906207 41.5435611403119 38.6662194645633  
43.9541718254769  
TAS2R14 39.0620487644635 38.9338521051669 43.7630587657205  
45.5869891570251 43.9450023643394 46.0364000143537 47.1345949868029  
45.2806199505029 53.1249776278067 42.785429206422 41.4508241771315  
40.1700117452801  
TAS2R16 40.0557788909923 37.5469247328848 42.8270038153139  
37.29566077996 36.2048942610546 44.0804700754786 44.6032218589199  
44.8997235283254 44.4395580493118 36.0481934423077 38.4689132737495  
39.5418280570561  
TAS2R3 37.4554876386402 42.4493032770053 41.528370959196  
42.8235313007746 39.6535880152834 34.9849896310235 44.0687697278114  
41.8417024632349 41.9635525160083 41.6373771565199 38.956280281655  
37.9607839934735  
TAS2R38 46.0920218698606 40.148780650831 50.0748292497578  
50.378948785456 44.9936360641969 49.3172204533818 45.8980298854198  
47.2009420656854 43.8482802038826 49.4006068471301 58.8188963227059  
40.8681871019812  
TAS2R39 41.0608773166058 41.0678614026819 40.1985790927248  
43.074472921841 43.6587492470348 39.6251842352088 41.3594868055879  
35.7973685350741 37.10170285405 38.8507804383261 37.8372168909583  
38.2350720635382

TAS2R4 39.0620487644635 45.4882438975269 41.437237454134  
37.651298468202 43.3332476888305 31.6419446793642 38.1793598983615  
38.6454098044474 44.7058233759912 41.9666541498638 43.5710871617107  
40.0557788909923

TAS2R40 31.5599106749655 37.4540772310118 34.806104801006  
40.1804147506786 38.6454098044474 37.1317006162938 46.0228732507872  
39.2672712041774 33.6902293666089 36.1550293353654 38.4689132737495  
39.0536056496869

TAS2R41 47.7267190613906 51.6869155634183 46.4569566520107  
52.5307002738469 51.7983110178095 45.9266745571724 42.0605906240248  
43.6434576713809 48.6494451061637 47.7180816682562 39.5399188536544  
37.3600014814388

TAS2R42 35.8208542506595 43.3458769998118 38.9790184198145  
42.0102671859606 41.8806343997257 35.0970060242246 44.2166118829877  
42.6450179841129 47.7086093893038 39.7835513496873 36.6298807161755  
38.1421709520616

TAS2R43 40.4639532172338 37.10170285405 43.6670755115848  
41.5464765641928 46.0043807840705 47.7556758818053 41.0381860307445  
42.7431359850339 41.1742244762318 43.9450023643394 47.1477056711335  
43.4709415392696

TAS2R44 44.1294459089314 38.8336427948187 40.0998167098057  
38.4208429103799 47.0954207417646 44.9896851005259 39.3585350448719  
43.6434576713809 31.1401844809132 39.4710743516517 41.6336636285875  
41.9430737035925

TAS2R45 42.5193208629123 52.5868047927666 45.3974838013476  
49.1786207920603 40.9950639693255 46.3715909653832 45.223075311113  
38.956280281655 47.27543600687 41.0057887014368 49.1868644496737  
41.9430737035925

TAS2R46 42.1537476443423 45.0905928998779 39.8299340037009  
39.9697332660833 42.9090346219023 45.2852528185486 37.4772922422734  
40.7311497914871 39.6609238036815 37.0320432433314 40.6373400186325  
38.6454098044474

TAS2R48 37.9387791625384 39.1982470626863 46.4569566520107  
38.4208429103799 43.844855336215 34.6977013306396 36.5352572191451  
36.5393857306744 52.2631308081333 42.3606390470387 43.5710871617107  
39.7411455670172

TAS2R49 47.2862299990938 45.3486182278177 44.4311655729487  
36.9912468186322 52.4370718282084 45.4882438975269 38.7337086062875  
45.5581356216957 49.8304479381623 47.7180816682562 48.6184776976167  
45.1735152121056

TAS2R5 39.9697332660833 40.7952353240579 45.989212296035  
41.3027031037343 40.7779767565889 43.8582747295766 38.7337086062875  
40.5158867964016 41.1742244762318 40.2112371512838 48.5292718280498  
42.1537476443423

TAS2R50 28.8989112359112 32.2133093774284 38.7745734037492  
37.4223289687135 30.2139683801331 36.2768299545794 38.8417151851134  
35.4526946152955 38.7298222155532 36.6893251782922 35.1470994647364  
37.4554876386402

TAS2R60 43.844855336215 43.5873188565519 41.8751578329365  
42.9358255168086 39.7568367479301 40.9506062495231 41.706879587091  
41.1575777497576 46.0106098064475 35.8304004211528 43.0016969050339  
39.1553169409075

TAS2R7 37.3463875295726 34.3715326040967 32.6121532029976  
39.5050383901884 41.2740822675592 36.8059561571675 41.3594868055879

39.9576138799997 34.4716904283753 37.3179578037963 39.6403089864678  
40.8681871019812  
TAS2R8 38.4330755397458 39.6493706695391 39.9101908547397  
39.853175885492 39.528971131769 38.1699123824764 44.0687697278114  
38.5086872173449 41.5635499110307 37.8217989841918 43.2551508830106  
42.8864415494484  
TAS2R9 40.0557788909923 41.2598458726002 37.9482157381008  
39.853175885492 42.9090346219023 38.7340969861754 39.7576136507593  
41.7419877611072 44.1519466943185 42.4594149893798 34.064698871541  
41.2437378488025  
TASP1 63.3717459766798 83.1979076141836 74.2122914028677 56.0794100106654  
98.2280780221631 96.034706957068 89.2913927776683 54.0507720792049  
66.603126065489 64.8549209064366 85.1114448808779 80.8366627364071  
TAT 48.0201377454632 41.0678614026819 44.696023817801 47.6687908290818  
39.6535880152834 40.9506062495231 34.5633623842083 42.5435283762933  
40.7847110517594 41.8613406887824 45.4799270968969 42.9887069977696  
TATDN1 97.3929166450379 82.8205269728224 69.7215372275927  
59.5370927657967 97.5736219666974 92.8644908993284 67.3359520423391  
63.0245691276326 92.7667038784226 68.4659783447092 68.1992221684165  
89.1771576058145  
TATDN2 127.694844372277 101.523741547876 80.6674009289482  
124.976348531594 118.376686726902 86.6910280940418 107.808744445896  
176.866350130563 103.513421757522 112.613079254002 110.626479311082  
93.523394623588  
TATDN3 76.6094442444074 109.901105821696 123.908152883436  
129.865093249948 77.5698542248061 105.743957034577 101.337735124049  
97.8764110456132 95.2956103624468 84.7642634532073 80.882176929636  
93.5928272702304  
TAX1BP1 1876.51621222292 1521.20630233299 965.530928317269  
1041.84536202049 846.773659307087 1232.7632290973 958.473187253938  
932.849256536912 1310.03307063841 939.453799186397 1009.47177197543  
1135.43644148537  
TAX1BP3 710.579735673002 736.626341475753 993.626865290891  
349.83809766755 543.454040390679 568.905368101326 613.50943414129  
361.776841675393 657.59007878546 858.228943026906 1023.81381775221  
754.700295017212  
TAZ 64.2336357529479 69.1414574152997 87.1651984640976 71.6354627933716  
89.7002002853947 66.6894494536346 76.2562837208441 74.6572522248684  
82.9467575626263 96.2058974277481 84.0733026747075 74.8170892324966  
TBC1D1 46.441301934328 42.9358255168086 40.4070046183108  
41.7614975630362 40.2449343247539 51.3886035574416 39.7576136507593  
46.2779564481158 43.9450023643394 52.5522545249206 49.8393069675192  
47.6938628797168  
TBC1D10A 52.502055890816 66.1288889125299 75.0377156190383  
62.3936376596431 58.4383854340181 44.0804700754786 58.7585623394335  
63.9110569727542 65.8622973953004 49.6203214143464 54.5711704180349  
80.1461294346211  
TBC1D10B 90.0617510514621 62.3102413989199 59.1040441894478  
46.1673159982664 70.9638091288679 41.7627910693483 59.5205055437765  
120.142759111608 58.3564461855595 88.5601339449828 82.7309298534989  
53.0446815750355  
TBC1D10C 72.4966502412724 156.061711961514 116.184007615285  
331.824390642864 51.1368583672022 59.7009992986607 96.5030525416431

80.3860547572521 46.8873421271259 57.9713749600418 97.7965639721152  
43.6753843488695  
TBC1D12 43.844855336215 41.2598458726002 42.7303139017786  
46.614092935749 42.7107928951766 46.4648868771662 43.4544762830742  
42.6450179841129 48.1174861108648 46.325232414659 46.7386599624801  
45.5800840647989  
TBC1D13 110.487281983469 135.769551614412 85.7111041637416  
98.0023132593711 98.403191200835 113.669790961194 114.657635596229  
87.9468208580228 72.9752827496503 139.142835448881 113.879493668284  
115.143810463938  
TBC1D14 284.795064481553 308.183340806373 226.926786963011  
531.36214636517 300.560071753181 299.094486437911 153.643631245787  
121.336830564295 180.319381873429 233.635083076472 212.576203581294  
217.425223098994  
TBC1D15 247.966757890598 144.835567449189 128.776189744323  
392.008276951929 112.000099082544 227.206974078547 185.618644212826  
172.433936159136 167.410607476565 181.545493080363 155.050936910986  
231.472806936915  
TBC1D16 146.42128243217 114.876346000655 77.9085946827079  
109.310200749289 171.899182876869 90.7101037998119 133.192618821838  
121.945468001236 95.7194132679937 78.0658258913875 77.4625808567081  
80.8366627364071  
TBC1D17 73.1931742801095 80.257554904218 132.52749757795  
66.4047895961325 99.6821042055758 111.532958750074 68.2708120569221  
66.7530718914083 105.434580236651 125.243627451767 123.27141431776  
69.3483108270756  
TBC1D19 66.3095900379311 55.3477556906605 53.0104469636221  
50.2163892855092 51.1368583672022 100.650129064849 59.0457625163577  
77.6174893940285 65.3672880026114 64.2174369755376 70.5133836963171  
91.8935361535002  
TBC1D2 130.848965290163 156.591349262922 115.468303687641  
286.291779906932 101.156215957297 68.9562915755919 124.032371632524  
74.2517888452553 130.455608913636 148.358988653522 196.709620264975  
230.787791652978  
TBC1D20 140.128033028434 108.147548794301 110.431464700539  
119.015431849218 88.2427413480277 152.426698798326 134.853649092952  
127.596368103014 106.418690759491 218.999184133546 231.110382348467  
167.319747725488  
TBC1D21 40.3478825593224 36.2103905554984 37.6557714476853  
35.49696651597 29.9775071862804 48.1591264215184 33.5578650644246  
32.229154316188 39.7537274655115 39.2623423164488 40.723990462047  
39.2469742642337  
TBC1D22A 52.5792653122861 55.3477556906605 47.9035532886869  
47.3574589211166 54.1225249245036 42.357910063876 41.5817737564592  
37.1317006162938 49.9162522057712 41.2276963324981 54.5711704180349  
46.0633179231318  
TBC1D22B 128.04037427867 74.0039764902057 99.9841766494502  
74.0093517743852 94.8408264309872 77.3999378505514 93.0538726751588  
82.3364971911816 93.0888239577809 174.303754116679 142.192315159235  
121.696160351886  
TBC1D23 64.0759817636265 67.6169355376864 71.2246788429078  
71.1583251698218 73.9456720099807 79.2701322339022 72.3515874601288  
44.5029690493211 67.5047089908724 42.2614524730856 47.7535797917441  
63.6966761077037

TBC1D24 40.0988483617359 55.1894915500227 50.0050760710506  
44.0991023527481 65.4532436627427 43.3785777889265 44.6809101024392  
37.7217193704498 48.692302914163 39.1621898366355 45.9104478407175  
46.2625470410195  
TBC1D25 47.3289285415289 49.2560467081687 50.7774722329703  
48.9155368657318 46.0977687311222 47.0940613507321 55.4948034470314  
45.7476095696859 53.0357938671646 58.6439719071099 52.2973903538281  
50.0159415986047  
TBC1D26 40.8681871019812 38.8336427948187 46.3411353377615  
43.8002456102021 39.5595233162192 39.9397419279057 35.9894133432376  
38.4540849632254 40.2274522635576 39.6719190054379 37.5583886316038  
39.4490233720848  
TBC1D28 42.9655396732962 41.4508241771315 39.7683846616421  
41.6564075217517 41.9322044100235 43.6960408897486 41.6520912742594  
38.8200554701359 44.1070537445005 45.085108274505 41.4508241771315  
41.0183489151839  
TBC1D29 39.8662795144616 33.5924201549249 40.4070046183108  
38.8495095797881 44.9936360641969 42.4580504587581 44.9863726205428  
38.5457716679071 38.5252456306656 34.2638875325204 40.4504608195666  
35.5523662009011  
TBC1D2B 196.760671234837 294.849830545881 315.163147652199  
215.907790093087 248.194954741095 267.024267633341 143.6667863386  
146.426853713038 155.018308238778 401.956364010068 377.573838771285  
234.873589896708  
TBC1D3 46.8954576545929 43.4396866157171 49.6347864008749  
45.7397504535169 44.2607789091176 42.4580504587581 46.1634822993009  
39.3709357615493 58.174555206394 48.3693338695392 47.6125796208753  
51.7833333848627  
TBC1D3B 81.7367617812869 63.955655956484 86.0832675838966  
44.8727287473605 76.093116738739 51.9421032049606 78.3740506001325  
49.9785044772265 85.1920126487447 103.808640431626 81.528980339501  
99.1438953564062  
TBC1D3C 58.4139484810943 47.765848710116 61.4416707689893  
41.0219290963778 55.8173045043348 46.4648868771662 67.1299518044849  
43.3838505886856 66.4900180648559 55.5712957590038 54.1618170692792  
68.4278345554565  
TBC1D3E 36.7356360093603 30.2139683801331 34.8956628705329  
32.554751989205 36.7356360093603 37.4782441311626 34.0777108441756  
32.8834169462007 34.9428206949566 32.5178504369282 33.6902293666089  
34.9138625012006  
TBC1D3G 83.1614238528477 79.1039287828151 93.7782490229256  
58.1798515131249 80.6200293361016 71.3932787152381 121.36340610316  
70.0697974278875 107.276913085701 103.968071466212 91.1363393944977  
126.956031076807  
TBC1D4 57.4376528157926 68.1040271620925 104.250582652805  
103.349712762251 96.4112435621587 64.5187138759372 56.4809146784765  
52.5909491535773 104.341160312305 142.731630650904 108.779357041421  
122.837001441551  
TBC1D5 48.1952521496489 62.6984594468418 66.1541420734416  
50.378948785456 65.9413235523618 57.4777075615651 53.7423898357583  
51.2623287419357 50.6750785584772 48.0211752672327 53.9517841438975  
66.2305843819029  
TBC1D7 357.254500791202 160.586001103533 197.52820443061  
287.883101814563 291.785618741057 129.299077627671 212.822978676596

464.671881584567 262.735075993242 118.501031900986 136.482957391332  
 146.61436309209  
 TBC1D8 85.9970657980042 162.424734330982 212.813224717262  
 126.911056987607 55.4030910454028 88.7605288058249 130.313381811168  
 217.425223098994 113.655306804539 160.187478921145 172.990533342251  
 132.107655569343  
 TBC1D8B 46.68364047986 45.6948619492056 47.2055133646385  
 42.7489468897708 44.2120774064277 46.8489364403188 43.8206425661746  
 44.8727287473605 47.2127947618164 45.3954000575181 46.8752988519617  
 47.6938628797168  
 TBC1D9 89.3989848564067 230.486681581762 133.798096986107  
 189.47090669378 147.017279035061 116.51037006692 178.608544676872  
 246.725921565571 120.34542294172 170.150808455621 183.165559564289  
 148.312100828662  
 TBC1D9B 114.666088291556 81.7866333107878 103.746508465792  
 111.071209057746 104.32908065084 108.138395958121 87.3957386451235  
 79.4300569391437 120.807573842238 99.7807691901691 95.5325488969517  
 118.696127260286  
 TBCA 1845.34855798442 2091.0611913538 1945.33618761041 1436.67510926345  
 2096.51999792183 1950.93175239958 2506.05102956991 1670.01014610464  
 1991.4199819544 1384.80615431656 1676.22158135012 2498.54878472152  
 TBCB 389.686780706341 338.259574728963 395.634889855838 315.163147652199  
 299.136348099827 527.686970237622 668.773022931608 441.710000911092  
 480.386431986343 441.710000911092 426.933064567744 312.015358620043  
 TBCC 169.500205172068 186.600931545083 111.077646506425 119.833821068193  
 152.272399644814 134.749803376372 156.311985997533 81.4881766238989  
 130.184962393833 80.5388767883646 86.3374157614394 56.8534370691413  
 TBCCD1 62.5968484440453 57.9151768280253 68.3234331335073  
 56.7106584977089 73.9849634565924 55.0618818132967 64.1777305915695  
 50.9099078696349 67.7898066939846 47.0055981216687 53.0177144132449  
 59.4465684293847  
 TB CD 280.075938355178 173.677648729894 187.238252376588 156.043152125612  
 171.33368481035 128.219615202232 295.5163490537 279.632025097952  
 249.002758392739 170.901596796384 207.0155359394 128.230543301378  
 TBCE 109.5145190042 130.239763076999 184.303357812653 106.712703356565  
 152.272399644814 158.843766201769 157.463465828715 124.76401857899  
 146.483908799607 96.9880759408512 105.503925445543 113.735641101347  
 TBCEL 36.6480005877129 38.8336427948187 40.0998167098057 37.8442841690502  
 43.1252272136667 42.5660695551615 40.7910160811527 40.3357777530419  
 36.3649677956953 38.745552403895 44.9713479185144 38.0452862258803  
 TBK1 336.44013572926 249.704644191338 264.495576211074 404.440365771217  
 189.489924338503 248.691595276298 271.138311888031 231.893992191022  
 390.906200053021 210.282066967005 229.926637466766 296.842555066902  
 TBKBP1 47.9175508887533 45.4143854024453 47.646800205189  
 43.1847628331565 48.3814421939888 47.5733603903505 45.223075311113  
 47.6952179922944 46.6944238390932 48.6124127998952 55.7868713984479  
 51.4308501933893  
 TBL1X 149.769671874782 148.544012961815 99.9841766494502 144.427680369554  
 212.090033606355 287.059183013009 317.186419919708 251.33720343548  
 218.446312290024 393.001025840896 280.034472186873 302.50850157207  
 TBL1XR1 57.0006212637829 60.2547250212462 68.0649030501515  
 44.550322123994 80.3500323413132 69.5645254789371 64.8367546135053  
 50.3082459161777 124.064628168507 66.3956936248447 67.7280831060202  
 78.0006681166995

|       |                   |                  |                  |                  |
|-------|-------------------|------------------|------------------|------------------|
| TBL1Y | 36.3649677956953  | 39.7495102340049 | 37.5597671487621 | 39.9084621723809 |
|       | 43.5836473788312  | 38.9661430990729 | 41.5464765641928 | 47.2009420656854 |
|       | 41.4397539024976  | 42.7275315121163 | 47.4630625313159 | 40.4639532172338 |
| TBL2  | 131.483899499125  | 115.475642927427 | 99.9841766494502 | 121.104663867264 |
|       | 129.270792739554  | 101.020328028769 | 99.2824152850072 | 108.700838142885 |
|       | 104.696298671673  | 74.5694657001572 | 96.7799695976296 | 94.9831937714438 |
| TBL3  | 64.2690842803282  | 79.5488891958168 | 135.106756607914 | 84.0899854321388 |
|       | 98.0143500562821  | 87.6507489853626 | 100.756165194192 | 67.9103729751746 |
|       | 94.1050519074545  | 74.1228645930185 | 104.241389167544 | 70.6903168772326 |
| TBN   | 48.1125722136997  | 45.6533175604486 | 45.5883690965192 | 45.4634652319753 |
|       | 46.6397391251762  | 54.1440452292081 | 42.629412460409  | 41.9315419791594 |
|       | 43.1805016690297  | 54.6089451252049 | 41.4508241771315 | 40.8681871019812 |
| TBP   | 195.482216656634  | 193.468773556057 | 186.301404367238 | 129.190555260332 |
|       | 142.863673914134  | 148.683947515074 | 148.440257128143 | 85.1544284060549 |
|       | 106.799510275842  | 141.087571926258 | 162.721587349434 | 162.908986027874 |
| TBPL1 | 190.348435737155  | 218.400420636994 | 189.542991004953 | 258.726193861248 |
|       | 162.902264837659  | 196.844428284247 | 250.832808506455 | 160.385057525357 |
|       | 169.251790128723  | 171.238235624104 | 189.737472782071 | 207.741669973713 |
| TBPL2 | 40.8681871019812  | 41.4508241771315 | 48.3847843498476 | 43.1847628331565 |
|       | 42.0709558258414  | 36.2015763253919 | 42.7431359850339 | 42.357910063876  |
|       | 41.2870505273664  | 40.5090849993014 | 43.844855336215  | 42.6758568421347 |
| TBR1  | 41.1523487516364  | 42.6939394537076 | 39.1799070031819 | 34.5425384901279 |
|       | 38.4540849632254  | 36.1190722948669 | 45.1017494688414 | 40.4359177791566 |
|       | 33.9456837661864  | 43.1839109702714 | 39.2542963855807 | 39.6352613956998 |
| TBRG1 | 41.7835997867848  | 46.29198852834   | 42.8270038153139 | 50.5310598656998 |
|       | 46.5557478175976  | 39.1664256481434 | 41.5464765641928 | 39.4710743516517 |
|       | 42.9413736814915  | 38.2550371518309 | 45.0985088502363 | 40.1235656101329 |
| TBRG4 | 246.351606918353  | 186.67069792963  | 195.303781999387 | 126.775432305478 |
|       | 281.452208033175  | 141.960773054307 | 234.778900405354 | 252.347641176529 |
|       | 265.414737742846  | 190.161505611036 | 228.439524702578 | 150.957220787781 |
| TBX1  | 44.5708252613722  | 193.897678586782 | 70.5814261430207 | 41.9455842688118 |
|       | 57.1070449050465  | 44.5934007403381 | 46.8013512873149 | 59.5444359507702 |
|       | 63.3694113050568  | 47.611018474151  | 50.9339938653926 | 46.3411353377615 |
| TBX10 | 37.7384958256497  | 46.4861258030402 | 40.301483914446  | 45.8844325913247 |
|       | 46.8674366115656  | 41.0582900711341 | 56.3376046940285 | 44.4031868028216 |
|       | 42.357910063876   | 46.0119912782855 | 42.6366765186182 | 51.8562635270111 |
| TBX15 | 42.6036491382658  | 79.7434272763658 | 69.6554376880691 | 41.4273122914951 |
|       | 44.0451487108213  | 44.3648993568405 | 46.4388841354122 | 38.1835938174625 |
|       | 66.7750249658122  | 42.785429206422  | 43.7585538437696 | 39.6352613956998 |
| TBX18 | 43.0394685862018  | 42.140045812061  | 41.8318916956692 | 44.2222841572272 |
|       | 43.7517118200398  | 45.7792335738285 | 40.0557788909923 | 43.4812166409346 |
|       | 53.6982043633833  | 45.3947052423717 | 41.0554874392252 | 44.1211971585961 |
| TBX19 | 75.0237373605584  | 50.4022543872993 | 61.7502624458447 | 58.3475983630509 |
|       | 61.3851695159988  | 51.6053353177789 | 51.2318935933116 | 52.407151732257  |
|       | 52.4539007817929  | 65.429256309049  | 59.8509516999438 | 54.5921287593554 |
| TBX2  | 78.9028182143923  | 505.294880430281 | 138.362914843774 | 61.5515639412892 |
|       | 168.407377937447  | 111.532958750074 | 413.516548092483 | 622.964590694346 |
|       | 107.808744445896  | 218.400420636994 | 242.546821017091 | 131.238796973323 |
| TBX20 | 43.7585538437696  | 40.4882741869718 | 41.8318916956692 | 41.5937402943136 |
|       | 42.8414096678708  | 43.9351969768311 | 46.2478069975709 | 41.2551966132486 |
|       | 41.0381860307445  | 42.3606390470387 | 43.3085358214154 | 41.0657892043496 |
| TBX21 | 34.8099089553046  | 35.3307157989724 | 40.6737160001291 | 35.6928955245309 |
|       | 32.2133093774284  | 39.4953494583071 | 30.1388203764747 | 37.2237132058632 |
|       | 38.43444387289956 | 35.4990901121893 | 32.8881500803623 | 28.768101860452  |

|        |                  |                  |                   |                  |
|--------|------------------|------------------|-------------------|------------------|
| TBX22  | 40.6062943725118 | 44.7200265825016 | 45.4865173433646  | 38.9534635879195 |
|        | 44.5668141895992 | 45.6706505553383 | 46.4944619663072  | 43.5752393599169 |
|        | 43.2761454096265 | 45.3530683538086 | 43.1724740315182  | 46.4499258373233 |
| TBX3   | 88.5806805188951 | 346.621778258188 | 251.4927207704    | 62.5106969730855 |
|        | 367.931222555457 | 93.691983111538  | 339.313853828248  | 150.778095336356 |
|        | 423.989018031638 | 377.491895827114 | 305.279475274196  | 259.033660186329 |
| TBX4   | 46.9939712192224 | 38.9338521051669 | 44.8872784170036  | 38.745552403895  |
|        | 35.7973685350741 | 42.5660695551615 | 41.3594868055879  | 34.806104801006  |
|        | 43.0930293831497 | 45.0155543555707 | 41.9908237694988  | 50.1579724208315 |
| TBX5   | 38.4344387289956 | 42.3647968647967 | 39.6037514046494  | 47.0033848638449 |
|        | 41.0885562160946 | 42.8181679217665 | 42.57175366709    | 41.2040352443154 |
|        | 38.4344387289956 | 41.7877325563821 | 39.5748670524951  | 40.9058811573481 |
| TBX6   | 46.048634754387  | 47.4740726032707 | 74.8071157013401  | 42.1679276329916 |
|        | 50.7615314686244 | 40.8956286697415 | 44.2688720583707  | 44.2580151149956 |
|        | 46.5549623118323 | 56.4978377936863 | 52.2507998034216  | 47.9147866006118 |
| TBXA2R | 40.148780650831  | 38.5808034535515 | 42.8663534227844  |                  |
|        | 40.0195349109823 | 40.0599807618105 | 40.3840175122961  | 37.6455751461448 |
|        | 38.5073031329596 | 39.6345710603047 | 39.1128725343972  | 38.6322728994674 |
|        | 37.7526485343328 |                  |                   |                  |
| TBXAS1 | 98.6108785181637 | 105.34055372228  | 88.9928368134295  |                  |
|        | 635.050535522135 | 93.9708162269401 | 208.97126697486   | 125.512567429299 |
|        | 93.1668080716761 | 47.5564423692142 | 64.8549209064366  | 68.0960719007162 |
|        | 74.0913177754682 |                  |                   |                  |
| TC2N   | 84.8139090643412 | 72.5397346298724 | 84.0785633788363  | 45.5869891570251 |
|        | 52.4370718282084 | 52.7156971154405 | 116.555666104916  | 105.965906809429 |
|        | 82.0993943936197 | 84.1639779987105 | 96.2248868829355  | 81.2068428211497 |
| TCAP   | 43.9309845324767 | 36.6002100641539 | 45.4865173433646  | 47.481302504066  |
|        | 42.7107928951766 | 41.4508241771315 | 40.4359177791566  | 40.7311497914871 |
|        | 39.2809305246091 | 41.8613406887824 | 43.5710871617107  | 49.904979214379  |
| TCBA1  | 42.6036491382658 | 49.1283590719461 | 64.408176016319   | 37.5382094267692 |
|        | 41.467005949568  | 40.8634043028528 | 38.0598374201407  | 40.3357777530419 |
|        | 50.9010149857308 | 44.4652605017595 | 37.92304440150891 | 39.3575468494941 |
| TCEA1  | 84.3850767822327 | 156.061711961514 | 118.10944558223   | 79.9126192278104 |
|        | 112.23915619297  | 158.998384690038 | 139.062073456923  | 72.4325984501758 |
|        | 143.331212964837 | 64.1097859982912 | 80.1665291227124  | 132.81898450496  |
| TCEA2  | 90.1830062843449 | 92.8089247593564 | 111.501058276821  | 66.3404989659221 |
|        | 77.5889289318438 | 175.345244033253 | 108.082240435027  | 90.0223113095186 |
|        | 111.025105784166 | 184.964039515715 | 182.188883821722  | 145.419126322238 |
| TCEA3  | 228.054565950253 | 123.918925337643 | 213.655570682141  | 78.9479233685889 |
|        | 171.073367662623 | 427.066481790415 | 735.60603239712   | 668.584452504579 |
|        | 377.847116683974 | 559.296669575666 | 381.426926151034  | 264.924262411772 |
| TCEAL1 | 75.5751205142867 | 113.491158368594 | 115.643361390258  |                  |
|        | 74.8706881113318 | 78.1275793755619 | 283.30253361072   | 66.9499465764301 |
|        | 64.5257016285499 | 105.850715599198 | 102.952512767439  | 102.500172212095 |
|        | 170.015373751824 |                  |                   |                  |
| TCEAL2 | 50.315768338317  | 42.4493032770053 | 39.4710743516517  |                  |
|        | 54.6089451252049 | 42.9090346219023 | 677.668455095171  | 45.1017494688414 |
|        | 69.0819394834919 | 41.9635525160083 | 200.144817111902  | 249.584588371496 |
|        | 192.598135054768 |                  |                   |                  |
| TCEAL3 | 382.050584680669 | 396.93169345515  | 542.069156178791  |                  |
|        | 448.787414220553 | 357.029998842776 | 1928.53890809223  | 540.721068846198 |
|        | 486.044304392285 | 455.081394085527 | 1093.04440713629  | 1280.77934331703 |
|        | 1529.52516575545 |                  |                   |                  |



TCEAL4 394.990145259101 388.132295362791 463.84209540456  
287.689260887067 352.246108891022 1167.25317435052 499.744856832174  
542.069156178791 574.847203528544 949.60074350774 1142.67599037881  
1157.65264077595  
TCEAL5 40.8681871019812 48.4980626712175 38.9790184198145  
39.5050383901884 35.0181575202066 43.7630587657205 33.6696565339534  
37.0390589468421 43.3744503319109 36.0481934423077 37.3687900733549  
42.8864415494484  
TCEAL6 43.2724556187214 40.716553247236 41.3366779545815  
42.4580504587581 39.0564222526273 41.554942319225 44.8643898647322  
43.4544762830742 43.9450023643394 40.8049408996274 39.2542963855807  
40.3691324547049  
TCEAL7 47.7779356299965 46.1797803908218 43.0602678767669  
54.1240583139871 43.4885245598939 97.9586375307737 41.1886975241176  
45.4882438975269 43.6039443285137 58.115198353247 55.9269493191353  
51.6046415904452  
TCEAL8 232.815747390118 177.757247913754 212.712025285843  
165.311139930529 118.720812623965 242.83357283464 159.046483157634  
206.768099707991 228.809697062726 176.318618244066 154.707548614663  
266.07996221256  
TCEB1 445.760104546268 502.205366225368 311.585488207444 413.31638457585  
382.538365722661 350.106705208362 397.520960156896 315.163147652199  
470.004780385708 195.205980592503 191.330112738223 353.868749867979  
TCEB1P3 34.2180669723984 37.2810767789306 37.0642268327439  
42.2496337895968 42.269054475455 42.0574848021044 42.9803717121865  
39.9576138799997 37.1820543575123 37.2089297656361 39.9899430628542  
41.1554481567603  
TCEB2 938.151864971251 609.797179957996 1084.23003918768 946.081492716653  
609.797179957996 1089.08276262641 699.488969175268 741.908952472992  
1057.44729389649 1118.62223628039 925.486088550061 904.487756674518  
TCEB3 125.044670102036 151.472676874224 144.757886965525 163.299997237276  
269.618616631857 125.503897988367 205.789533350801 214.586915093492  
165.42634596698 102.294142438313 103.776211832712 100.423344358771  
TCEB3B 39.6609238036815 43.7644428186265 37.8386378737561  
37.4223289687135 38.8456942580061 40.4359177791566 41.253645578517  
41.2551966132486 40.6957787921451 43.401782064778 42.8263096141654  
41.9430737035925  
TCEB3C 37.1485601150873 41.6466169548846 48.4890615340603  
38.4208429103799 36.8059561571675 35.314469458379 51.9421032049606  
38.079222289614 45.9227107476843 39.7835513496873 39.9070785037411  
37.7526485343328  
TCERG1 75.5171857162768 95.7639712596394 121.945468001236  
70.7202372217584 110.322887827889 86.1055862202537 97.9004351588426  
84.9756044280631 92.6482170400325 85.7732262204681 84.575384445856  
95.0513978212968  
TCERG1L 35.8208542506595 37.2810767789306 31.5151915411476  
36.6501141438378 40.5710637884029 41.159706131351 37.9430145836712  
34.6977013306396 45.5779686360641 32.406093465115 38.079222289614  
36.7762265039864  
TCF1 38.304249186058 33.1817617228171 35.0970060242246 33.1817617228171  
38.9496515344837 39.2248354955045 34.1889222434768 40.1474543172332  
36.9060997041453 33.7883338848419 39.8184668132023 36.7762265039864

|        |                  |                  |                  |                  |
|--------|------------------|------------------|------------------|------------------|
| TCF12  | 127.836645375421 | 106.276392548097 | 89.9340376539354 | 99.1565755621214 |
|        | 108.400712514743 | 133.877825732645 | 115.530384771495 | 115.328304312071 |
|        | 119.965950077259 | 99.9951025176909 | 128.923092916744 | 116.374125502825 |
| TCF15  | 48.3814421939888 | 43.3458769998118 | 56.410923639913  | 38.4208429103799 |
|        | 69.1862663389904 | 55.6242009731278 | 45.3597029614942 | 44.4031868028216 |
|        | 55.4030910454028 | 46.325232414659  | 36.0481934423077 | 48.27609330316   |
| TCF19  | 46.1673159982664 | 42.5674652784208 | 42.5838166730113 | 40.3180310664156 |
|        | 44.20782151793   | 44.3648993568405 | 52.561573697155  | 42.6036491382658 |
|        | 46.3203995372658 | 42.0217776707284 | 40.1422119692495 | 40.9058811573481 |
| TCF2   | 44.9398051863989 | 54.3820590274321 | 50.2869791217819 | 35.9925262106468 |
|        | 45.0782075423781 | 38.486220880314  | 90.1964013788257 | 74.5173894803763 |
|        | 66.2552876795581 | 81.2359429678503 | 66.6332042895961 | 55.8775622338124 |
| TCF20  | 161.008205823493 | 87.8081021392626 | 88.1331756561668 | 92.4251917286941 |
|        | 111.438294720953 | 74.9006142438341 | 91.8251275769679 | 99.5192591352063 |
|        | 100.774098314706 | 104.672760332135 | 96.5030525416431 | 84.2728210732532 |
| TCF21  | 67.4846787600629 | 64.232967574797  | 52.4485219671976 | 47.3574589211166 |
|        | 71.136135376296  | 394.073743195755 | 38.8804689450815 | 75.854888525664  |
|        | 44.4395580493118 | 150.362006499825 | 217.617227445082 | 91.1926678904253 |
| TCF23  | 44.5282181324797 | 37.8217989841918 | 41.528370959196  | 40.5484717678957 |
|        | 39.7568367479301 | 41.0582900711341 | 39.2533668167483 | 39.5466975353131 |
|        | 39.853866204927  | 35.6208308220005 | 39.3667161654772 | 41.863927676552  |
| TCF25  | 579.038638774301 | 596.384327208699 | 1359.9708539999  | 556.417356025042 |
|        | 479.079946537291 | 612.441960343995 | 603.224267841548 | 509.004054793277 |
|        | 588.854342793207 | 751.150916058018 | 704.15545332905  | 556.728676214581 |
| TCF3   | 158.862722884436 | 167.678403380953 | 93.1349769600388 | 77.7973642829228 |
|        | 161.573327074375 | 95.8905266177905 | 122.316617618658 | 138.486962379511 |
|        | 190.099949303905 | 100.849815617918 | 83.3729277601518 | 89.1771576058145 |
| TCF4   | 113.866742186841 | 117.165519915808 | 112.727277807495 | 282.603767561794 |
|        | 91.7629175712824 | 201.764909400617 | 64.232967574797  | 120.286733441947 |
|        | 56.3441077510744 | 126.319731178054 | 178.188675055821 | 78.0586153423713 |
| TCF7   | 41.3910975991529 | 40.4681810792098 | 38.0958223740111 | 39.5748670524951 |
|        | 41.0608773166058 | 39.7590256232088 | 39.2809305246091 | 39.8016018354453 |
|        | 39.3506426665347 | 39.528971131769  | 38.2246384684884 | 39.7742005651286 |
| TCF7L1 | 63.9851732498913 | 43.5182502375207 | 51.3268475761593 |                  |
|        | 40.7481155008596 | 44.9936360641969 | 62.3497263884167 | 47.7390230243778 |
|        | 43.5544347011646 | 43.2761454096265 | 65.6721629145797 | 57.8111054584154 |
|        | 45.2783024981315 |                  |                  |                  |
| TCF7L2 | 42.5193208629123 | 66.3904351698776 | 54.7855575216687 |                  |
|        | 58.3475983630509 | 74.3523005665671 | 52.5330333302271 | 95.6697427870979 |
|        | 53.7378346199838 | 45.0017158586743 | 51.8412522234186 | 73.7060605978536 |
|        | 48.1627097465883 |                  |                  |                  |
| TCFL5  | 137.897231677665 | 138.655669174533 | 99.6101168315098 | 126.911056987607 |
|        | 263.125290391542 | 224.412339736769 | 73.8313212063649 | 116.434267173815 |
|        | 128.391264770998 | 144.954155897343 | 186.759757179509 | 256.80504454312  |
| TCHH   | 66.5500089527674 | 46.9919960628953 | 46.1653991089885 | 55.6481366056639 |
|        | 54.3116862772198 | 46.6872654833579 | 48.6395795163502 | 48.7814131120945 |
|        | 51.5888395924843 | 46.5650556481721 | 49.3901004211918 | 47.2131144508464 |
| TCHHL1 | 40.6559419616644 | 35.8227939208521 | 37.4642807402741 |                  |
|        | 32.7960913111995 | 34.806104801006  | 38.3418933808844 | 41.706879587091  |
|        | 37.1317006162938 | 32.9756367838345 | 31.8890957468737 | 32.9879066304034 |
|        | 31.372171135652  |                  |                  |                  |
| TCHP   | 51.413025495745  | 68.1040271620925 | 70.9377012403023 | 55.4180794172794 |
|        | 62.5106969730855 | 73.4820932957859 | 66.5422130374814 | 55.3122077514658 |
|        | 75.0310858627394 | 58.5087296620514 | 55.9269493191353 | 58.8188963227059 |

|         |                  |                   |                  |                  |
|---------|------------------|-------------------|------------------|------------------|
| TCIRG1  | 108.242021650278 | 141.180682718758  | 169.664184704618 |                  |
|         | 318.690767783738 | 76.4212570031171  | 97.2535496140648 | 136.806769571262 |
|         | 108.083751469991 | 113.113062709739  | 128.365609268093 | 165.220069268347 |
|         | 107.055174400714 |                   |                  |                  |
| TCL1A   | 37.1485601150873 | 43.5873188565519  | 40.1985790927248 | 39.9697332660833 |
|         | 41.1868052124344 | 38.1169703906207  | 44.2166118829877 | 41.9315419791594 |
|         | 41.1742244762318 | 43.4885245598939  | 36.43924066428   | 44.2527566343661 |
| TCL1B   | 42.8036731479932 | 41.4508241771315  | 38.9790184198145 | 38.6414316877471 |
|         | 36.4434672195785 | 33.7818132446042  | 39.9519547348106 | 41.5934628038429 |
|         | 34.5023764006976 | 39.8873706855774  | 42.8742421276144 | 43.8336862998829 |
| TCL6    | 41.0871827071116 | 42.6022652963326  | 41.528370959196  | 42.2496337895968 |
|         | 40.2903961886288 | 42.0082685530808  | 40.4995052849302 | 41.9890955144165 |
|         | 42.992884918158  | 44.4216649723137  | 42.4580504587581 | 40.6301588195752 |
| TCN1    | 240.6614822416   | 11795.0477101407  | 1109.17675353971 | 113.528908699366 |
|         | 64.9072331703985 | 94.2678678253657  | 62.0404348860702 | 57.9713749600418 |
|         | 555.910110984847 | 271.529471399941  | 227.535855856645 | 45.0035308952466 |
| TCN2    | 119.591054636527 | 59.8102324370568  | 96.7948977485109 | 250.585851778133 |
|         | 81.6486527718661 | 154.633672616367  | 91.7761668960824 | 73.5950442915143 |
|         | 75.3222734438062 | 112.760972238512  | 88.2314365506494 | 101.627551729492 |
| TCOF1   | 40.7084119829585 | 42.9020321355927  | 43.7630587657205 | 43.1847628331565 |
|         | 44.9474751009842 | 40.8970401536578  | 39.5496902678788 | 43.7839209303388 |
|         | 43.2761454096265 | 44.3334496376397  | 42.7275315121163 | 43.6177016821274 |
| TCP1    | 102.980622026276 | 130.908206625954  | 100.597578643877 | 78.8968326770219 |
|         | 106.454367084321 | 105.699748702315  | 117.556281726503 | 86.9709077763908 |
|         | 96.6294773538052 | 75.4732674021193  | 78.5108643908344 | 97.6023731094756 |
| TCP10   | 39.5676051939342 | 37.7384958256497  | 41.7364024833895 | 39.9697332660833 |
|         | 39.3866822630357 | 42.1095407186921  | 41.0381860307445 | 40.7311497914871 |
|         | 42.7606905460304 | 40.4570408590493  | 43.1931731665131 | 41.800198520267  |
| TCP10L  | 50.9381343674699 | 52.2501726671381  | 43.6670755115848 |                  |
|         | 56.4578213622965 | 49.0828761839116  | 48.9826868640753 | 46.4388841354122 |
|         | 61.016921238986  | 56.6079099547057  | 47.2299678280724 | 48.042366934301  |
|         | 54.3587260982091 |                   |                  |                  |
| TCP10L2 | 41.0608773166058 | 44.1239711172417  | 42.8270038153139 |                  |
|         | 42.6913548400127 | 39.6535880152834  | 41.2567470068038 | 40.6750540874299 |
|         | 40.5158867964016 | 40.7847110517594  | 44.2580151149956 | 38.956280281655  |
|         | 40.3691324547049 |                   |                  |                  |
| TCP11   | 45.7356815244513 | 46.29198852834    | 48.6037684272115 | 48.665578118898  |
|         | 48.5000946421718 | 42.750861693377   | 53.4921736109774 | 45.642304356051  |
|         | 42.7150227340364 | 60.0372015630618  | 48.3847843498476 | 53.840976437122  |
| TCP11L1 | 57.155499689994  | 51.2405397507224  | 53.7792717770978 |                  |
|         | 71.7997882389171 | 41.7426502114261  | 63.4610447573417 | 42.22763273471   |
|         | 80.0213594533301 | 47.7644661363247  | 54.4190527512508 | 49.8393069675192 |
|         | 53.7442594289333 |                   |                  |                  |
| TCP11L2 | 42.6575535390785 | 46.0323106800336  | 39.4250105372135 |                  |
|         | 47.420942961753  | 45.2556760873335  | 39.5581166303303 | 41.706879587091  |
|         | 42.157627240486  | 48.2123120250343  | 49.0841460667818 | 40.8225507267584 |
|         | 45.4218947614732 |                   |                  |                  |
| TCTA    | 90.6805895192707 | 83.9271508264168  | 59.6565330440648 | 88.9113618165337 |
|         | 119.088986733238 | 79.6895408438974  | 130.890690835631 | 118.186590679218 |
|         | 73.8800799416166 | 138.637058021129  | 97.9497090233081 | 61.5300817099814 |
| TCTE1   | 35.9305494063137 | 32.8881500803623  | 36.0306975524309 | 34.5425384901279 |
|         | 32.4181238410234 | 37.4782441311626  | 38.5066108855005 | 36.6452480995946 |
|         | 35.4332080966594 | 32.90036444440608 | 33.4071187618571 | 37.3600014814388 |

|          |                  |                  |                  |                  |
|----------|------------------|------------------|------------------|------------------|
| TCTE3    | 37.55264801907   | 46.0713306971594 | 37.1643693306382 | 35.6027791404152 |
|          | 38.2496050953547 | 44.6524308640784 | 42.9803717121865 | 42.2577689927563 |
|          | 41.6616444147804 | 39.0648733099061 | 40.4504608195666 | 36.6603338274678 |
| TCTEX1D1 | 49.3463416794995 | 49.4982025424177 | 51.5292723244077 |                  |
|          | 59.6153684374766 | 48.6224651100733 | 53.2046867327331 | 42.2577689927563 |
|          | 54.0507720792049 | 47.27543600687   | 48.7414853386615 | 55.854474649572  |
|          | 49.6629259325705 |                  |                  |                  |
| TCTEX1D2 | 129.268600210689 | 100.271925566074 | 80.815808403022  |                  |
|          | 100.90948905426  | 201.360008430353 | 98.2180003781859 | 384.522115820048 |
|          | 216.654612568853 | 286.243476131448 | 93.6787442149817 | 93.9018973330737 |
|          | 132.257197568848 |                  |                  |                  |
| TCTEX1D4 | 41.0608773166058 | 41.0678614026819 | 39.5118967430322 |                  |
|          | 43.367124590178  | 38.6454098044474 | 44.5099734963815 | 39.700936357233  |
|          | 37.6058760248614 | 41.2870505273664 | 43.1839109702714 | 37.7384958256497 |
|          | 44.8872784170036 |                  |                  |                  |
| TCTN1    | 99.8231023149756 | 84.1224653052549 | 117.869393694564 | 95.1423940686828 |
|          | 145.083624161597 | 154.891160328731 | 110.422857502267 | 116.74427460886  |
|          | 130.600539398332 | 164.735191308776 | 146.892027926888 | 86.0230765383602 |
| TCTN2    | 40.9558083259517 | 38.8336427948187 | 41.528370959196  | 38.5252456306656 |
|          | 39.7568367479301 | 39.132725377815  | 46.3057385979341 | 42.9301944191913 |
|          | 34.9428206949566 | 39.3698811593364 | 32.9879066304034 | 39.0536056496869 |
| TDG      | 218.245471601353 | 366.515210930763 | 266.634368304904 | 354.973265582488 |
|          | 428.515605971056 | 241.486113826383 | 460.340300658834 | 336.904716156626 |
|          | 419.360641528378 | 269.963186760811 | 318.069132873489 | 253.207750345072 |
| TDGF1    | 37.4554876386402 | 37.3634897565502 | 41.8751578329365 | 41.3567204694281 |
|          | 39.528971131769  | 37.33030683349   | 38.2933870238743 | 41.0844534776541 |
|          | 38.7298222155532 | 42.0621425894624 | 37.3687900733549 | 36.3937388933751 |
| TDGF3    | 40.148780650831  | 38.2263227947189 | 36.5474283500601 | 35.6928955245309 |
|          | 40.5710637884029 | 39.3841861812262 | 43.5627649099623 | 40.1474543172332 |
|          | 40.4997186069494 | 44.0409178714232 | 39.5399188536544 | 40.6614700944853 |
| TDH      | 41.8409927585705 | 51.2405397507224 | 79.1649337367773 | 40.4359177791566 |
|          | 52.3242437351389 | 38.9378717994178 | 49.8281348927244 | 43.0390857698452 |
|          | 61.4842573582507 | 103.14577985944  | 71.4414688202373 | 63.2699016184868 |
| TDO2     | 69.1641374421455 | 53.6741873729867 | 67.6373573669424 | 246.568253751149 |
|          | 48.1473938886239 | 41.4508241771315 | 41.1886975241176 | 42.0847226073592 |
|          | 37.2810767789306 | 39.6251842352088 | 39.4410515050885 | 34.5103248688777 |
| TDP1     | 308.025419469334 | 178.060342847557 | 189.289063944393 | 252.949225605064 |
|          | 135.92805172353  | 131.57403028894  | 270.947794977829 | 298.670959394883 |
|          | 167.920131968611 | 319.248898194029 | 363.947777340854 | 271.813877560354 |
| TDRD1    | 302.465485470899 | 205.378123452174 | 236.910422092851 | 267.29148042787  |
|          | 199.294913752704 | 170.327588764719 | 259.769260154253 | 342.300139006451 |
|          | 176.936216428226 | 439.241483765416 | 413.31638457585  | 322.774093041134 |
| TDRD10   | 39.9697332660833 | 42.6939394537076 | 42.640829914102  |                  |
|          | 37.7469621225553 | 45.4751076037511 | 43.9724628401189 | 41.1507980856436 |
|          | 39.853866204927  | 41.7627910693483 | 39.5637454855233 | 43.1931731665131 |
|          | 52.6922486991742 |                  |                  |                  |
| TDRD3    | 77.2643026985097 | 63.0670482657086 | 48.6037684272115 | 56.2508140932179 |
|          | 58.4383854340181 | 76.7791768896805 | 63.7721358300879 | 54.9919060580109 |
|          | 59.2566572428546 | 62.6984594468418 | 59.0537479001842 | 69.7644070698124 |
| TDRD5    | 42.7150227340364 | 64.4837166864084 | 49.5424425850549 | 42.9358255168086 |
|          | 42.7982502551634 | 44.6524308640784 | 42.8684958525042 | 51.3472428383325 |
|          | 48.2123120250343 | 50.5252048155459 | 51.524711857679  | 37.2810767789306 |

|        |                  |                  |                  |                  |
|--------|------------------|------------------|------------------|------------------|
| TDRD6  | 39.3709357615493 | 38.4330755397458 | 39.8299340037009 | 46.0228732507872 |
|        | 36.6354013629791 | 45.3882138838137 | 43.1931731665131 | 36.3405039629059 |
|        | 43.9450023643394 | 49.1928206164702 | 45.7328341667151 | 44.4475838947656 |
| TDRD7  | 105.914573205761 | 161.844470327205 | 106.058751335133 | 186.64040927334  |
|        | 89.2285288333749 | 179.09303345382  | 174.492066109537 | 132.3192754634   |
|        | 134.218973300007 | 192.240593720489 | 166.608353896248 | 228.21982974423  |
| TDRD9  | 45.7017023767682 | 43.826317180678  | 44.1915202657512 | 74.0093517743852 |
|        | 38.745552403895  | 41.1090481599939 | 41.5817737564592 | 39.3113207075992 |
|        | 38.7578265341627 | 53.5498255316009 | 44.9081227425497 | 43.9366081640576 |
| TDRKH  | 52.2236479204029 | 39.6123051184545 | 47.3861758958576 | 41.8778873678551 |
|        | 52.2089306840125 | 46.7800033479223 | 64.232967574797  | 56.0496524902806 |
|        | 48.5792058061372 | 51.4454142248566 | 45.4799270968969 | 52.5752569429057 |
| TEAD1  | 40.308802735799  | 38.9534635879195 | 38.8775560911841 | 37.8442841690502 |
|        | 40.8873907150245 | 39.7394181011603 | 38.8775560911841 | 40.831207953647  |
|        | 38.6322728994674 | 38.6835649080278 | 39.5399188536544 | 39.3789825717286 |
| TEAD2  | 1024.97546870349 | 207.18510695093  | 173.582309251499 | 286.68367978144  |
|        | 687.011162822211 | 595.790464730847 | 640.78586776574  | 456.023620287811 |
|        | 498.608204176238 | 259.812381486915 | 263.765914589758 | 212.664574366477 |
| TEAD3  | 50.6473771879221 | 48.9899488302637 | 44.8872784170036 | 39.3750969348308 |
|        | 42.6022652963326 | 57.678188678075  | 41.8315602975157 | 43.4544762830742 |
|        | 51.4413099192899 | 50.6486940895674 | 47.4630625313159 | 54.5921287593554 |
| TEAD4  | 74.6776631832355 | 52.8796369426118 | 73.5541045639348 | 53.3967242431461 |
|        | 85.2849531543957 | 72.5075777230597 | 64.7650773032999 | 50.007830364606  |
|        | 73.7873098190297 | 48.1392888470269 | 51.3511088648386 | 64.863894209343  |
| TEC    | 37.3463875295726 | 39.1982470626863 | 38.7745734037492 | 42.2496337895968 |
|        | 46.0043807840705 | 42.6575535390785 | 37.0564573649223 | 39.9576138799997 |
|        | 45.7452456977857 | 43.9450023643394 | 42.0750889188255 | 42.7782216342806 |
| TECTA  | 44.6231541342    | 47.1332119496722 | 48.8941062980393 | 50.0526763693329 |
|        | 49.8304479381623 | 51.6053353177789 | 47.5963750520409 | 49.2901038327894 |
|        | 48.1174861108648 | 44.2580151149956 | 41.0808257270221 | 54.1090536870282 |
| TECTB  | 42.442231667357  | 35.1224289925572 | 44.6032218589199 | 39.2780515621926 |
|        | 35.6434124419782 | 37.9951997351435 | 36.197424053556  | 48.87875862356   |
|        | 44.0519245668737 | 39.4710743516517 | 38.079222289614  | 36.3454320848591 |
| TEDDM1 | 41.9407041937973 | 41.554942319225  | 39.991353369336  |                  |
|        | 47.2009420656854 | 51.1368583672022 | 42.750861693377  | 43.4544762830742 |
|        | 47.2009420656854 | 44.7058233759912 | 41.8613406887824 | 44.0409178714232 |
|        | 44.7401523707775 |                  |                  |                  |
| TEF    | 72.692416146584  | 78.4289643729837 | 87.6178717341967 | 98.5663841503803 |
|        | 75.7464604972652 | 99.2749350936362 | 63.928488869459  | 78.6911549149983 |
|        | 85.1114448808779 | 198.396715228812 | 146.691463448295 | 91.7906797118637 |
| TEK    | 77.1111458359361 | 99.9752275166514 | 134.271727318694 | 268.121244731705 |
|        | 93.1238695478498 | 156.69976952483  | 52.6510639680705 | 74.383456365584  |
|        | 49.7336769474446 | 71.0619469948187 | 87.3815040456105 | 93.5928272702304 |
| TEKT1  | 44.5282181324797 | 41.6466169548846 | 42.2577689927563 | 41.1886975241176 |
|        | 43.7517118200398 | 42.4580504587581 | 44.7255207589606 | 43.4544762830742 |
|        | 44.5303781239209 | 39.4710743516517 | 38.8507804383261 | 40.7704587752083 |
| TEKT2  | 42.0532901689036 | 51.4413099192899 | 48.8100349749783 | 57.8277957325085 |
|        | 42.6022652963326 | 51.4931742685391 | 52.0942589368478 | 57.037639245179  |
|        | 48.6494451061637 | 51.7594352155304 | 42.0750889188255 | 50.1579724208315 |
| TEKT3  | 41.7397731376692 | 39.5050383901884 | 36.769073068743  | 38.9534635879195 |
|        | 39.4693871570028 | 62.7515429046888 | 37.9430145836712 | 42.2577689927563 |
|        | 38.2215591930186 | 47.2299678280724 | 39.9070785037411 | 39.6352613956998 |

|         |                  |                  |                  |                  |
|---------|------------------|------------------|------------------|------------------|
| TEKT4   | 36.8072833828297 | 38.0226905622357 | 35.5220586859301 | 40.0698728584484 |
|         | 38.0598374201407 | 41.4508241771315 | 36.9355798143571 | 36.3405039629059 |
|         | 35.3227485563945 | 39.0648733099061 | 37.9946685306274 | 39.8497227447888 |
| TEKT5   | 40.3478825593224 | 47.2770121962655 | 44.2405728317107 | 41.3027031037343 |
|         | 38.5512429290626 | 41.0582900711341 | 52.561573697155  | 40.831207953647  |
|         | 52.9482338979681 | 42.6793753550854 | 41.7272875295469 | 44.0451487108213 |
| TELO2   | 91.9238405195899 | 108.542237471193 | 173.711189659585 | 57.2856683017619 |
|         | 127.345094323724 | 69.1523164481201 | 93.2133061608764 | 76.7710944291287 |
|         | 113.367264677544 | 94.4129246851651 | 105.197692490363 | 76.5411379733694 |
| TENC1   | 43.3078542962968 | 43.3972849968032 | 43.4709415392696 | 39.5637454855233 |
|         | 40.8371580087857 | 64.9498081060676 | 41.6466169548846 | 44.3557408297309 |
|         | 37.6383530120621 | 54.8346842758068 | 57.4408006697893 | 47.8472928419101 |
| TEP1    | 55.9249770393176 | 68.1040271620925 | 63.6334154351075 | 100.483113678344 |
|         | 50.5110359971301 | 60.877229406755  | 54.1707158323527 | 48.7814131120945 |
|         | 52.6561576154021 | 64.8549209064366 | 78.7260936224802 | 73.5599394565136 |
| TEPP    | 41.3848620620968 | 39.5050383901884 | 40.4412246793572 | 41.4273122914951 |
|         | 41.8503210829559 | 41.7627910693483 | 53.6446045619513 | 40.9901805728485 |
|         | 40.8970401536578 | 51.8412522234186 | 52.902043370862  | 57.1752846228778 |
| TERC    | 42.7150227340364 | 45.3486182278177 | 38.1421709520616 | 42.6913548400127 |
|         | 43.1252272136667 | 36.2768299545794 | 46.7100796279384 | 40.7311497914871 |
|         | 47.7086093893038 | 43.6033221838149 | 36.5359455830388 | 35.5523662009011 |
| TERF1   | 57.7494596863439 | 67.0402749076279 | 74.5173894803763 | 44.0912522138779 |
|         | 51.0107745412152 | 101.832945816193 | 65.6958831220258 | 65.0234989597222 |
|         | 53.7442594289333 | 69.5645254789371 | 74.4259825158584 | 62.2878942799819 |
| TERF2   | 162.272853632419 | 144.300051706447 | 206.337508331566 | 110.88526946931  |
|         | 201.180226922613 | 163.827112371305 | 128.966814822678 | 139.645717741863 |
|         | 152.942332679485 | 128.365609268093 | 155.795095438102 | 165.613176704286 |
| TERF2IP | 279.063292799015 | 309.293546994308 | 413.067407579649 |                  |
|         | 306.746364062777 | 249.679512440891 | 267.782994219864 | 183.028254350275 |
|         | 299.74710723735  | 199.687268345276 | 306.746364062777 | 295.430709655678 |
|         | 298.54401957868  |                  |                  |                  |
| TERT    | 45.8108990837624 | 42.810624012519  | 41.3366779545815 | 41.6045220683604 |
|         | 53.3086645804786 | 38.2971553419489 | 44.2166118829877 | 38.1835938174625 |
|         | 43.8106375505041 | 42.5193208629123 | 41.0050831223107 | 39.7844133452634 |
| TES     | 47.4964755141472 | 47.6914221838216 | 51.7138050344355 | 49.7350276169552 |
|         | 44.7829632472754 | 54.7869749455534 | 47.9525424951159 | 44.6107027295193 |
|         | 58.6010484516703 | 47.4548471240051 | 47.8988096575648 | 54.9919060580109 |
| TESC    | 46.9939712192224 | 2160.22713775462 | 1573.61108703981 | 95.3070802596041 |
|         | 615.838713743621 | 211.701234819986 | 387.311743342483 | 75.656434170689  |
|         | 69.2001494999588 | 1497.73669971925 | 1886.05449875658 | 748.372940917543 |
| TESK1   | 286.178856785544 | 313.316269590367 | 186.866378606003 | 241.677456498713 |
|         | 187.672799470683 | 315.065866567211 | 285.053017606956 | 268.683528469759 |
|         | 216.63059645927  | 264.548218296413 | 260.824949424185 | 241.51647940043  |
| TESK2   | 162.272853632419 | 73.9376772899278 | 71.2246788429078 | 79.4528447794527 |
|         | 100.645556491457 | 75.1674447943072 | 116.434267173815 | 254.066741436612 |
|         | 128.616776019243 | 89.1516394894484 | 95.92436282414   | 80.7227211275429 |
| TESSP1  | 38.5007204246293 | 39.5050383901884 | 40.301483914446  |                  |
|         | 45.0798408927912 | 36.2048942610546 | 39.132725377815  | 47.8947595316832 |
|         | 45.5581356216957 | 50.7619345314571 | 38.1042454705119 | 46.7386599624801 |
|         | 42.0424641526302 |                  |                  |                  |
| TESSP2  | 38.2083710281545 | 44.0409178714232 | 45.4865173433646 |                  |
|         | 46.8954576545929 | 46.9906120932727 | 49.7458652239071 | 36.9355798143571 |
|         | 36.6452480995946 | 42.1594905198929 | 40.5090849993014 | 44.6286581923295 |
|         | 43.6753843488695 |                  |                  |                  |

TESSP5 43.3638918705225 44.2105195734073 39.7411455670172  
 41.1886975241176 46.7508829977587 40.5281496800812 43.6753843488695  
 44.7044140979108 43.6670755115848 45.2556760873335 45.7328341667151  
 46.6397391251762  
 TET2 39.1590964332473 43.1805016690297 40.7620472083159 39.853175885492  
 39.2608760193011 37.4782441311626 55.4004611309636 41.5464765641928  
 40.137818555383 43.0919221375514 48.9754340235127 38.6454098044474  
 TET3 39.3709357615493 38.0226905622357 41.3366779545815 42.4580504587581  
 42.7982502551634 40.650742261428 40.1235656101329 44.5029690493211  
 42.1594905198929 39.9948390976317 42.357910063876 44.1452943804044  
 TEX10 134.743068051122 130.498680522614 94.8260360398356 159.440571032045  
 159.797219482154 142.03031230486 167.229755109155 129.070921534555  
 117.457080110677 130.812376632261 118.10944558223 119.301672388541  
 TEX101 38.1169703906207 35.6434124419782 36.8730514568925  
 34.3595588146954 35.7973685350741 37.9951997351435 45.8980298854198  
 41.3506832276112 41.074824727477 38.2069499294002 40.8225507267584  
 37.7526485343328  
 TEX11 45.2372944462326 43.4681646416585 42.6981470312295 44.484692294383  
 45.6895223823001 36.9565987097341 39.9620349773712 51.909968572392  
 42.6679886757687 39.0209841108908 40.4166536885831 39.0536056496869  
 TEX12 41.8409927585705 39.6123051184545 41.8751578329365 40.8681871019812  
 43.844855336215 39.3841861812262 45.7452456977857 37.1317006162938  
 37.3600014814388 42.1622837416589 39.2542963855807 41.7575097298927  
 TEX13A 44.8914371498528 46.6314009405034 50.0748292497578  
 50.7046706880325 46.3150221024046 50.4022543872993 44.7255207589606  
 44.9977782988116 50.0526763693329 50.5252048155459 47.6125796208753  
 48.3648494350286  
 TEX13B 37.9387791625384 39.0102066700839 38.5045333213784  
 38.4208429103799 38.4540849632254 45.7300501624017 39.7576136507593  
 44.2159020605784 40.4997186069494 45.3530683538086 39.9899430628542  
 46.6397391251762  
 TEX14 34.9594091440356 42.0500582486532 39.4710743516517 37.8442841690502  
 38.8456942580061 40.4753617660107 43.7585538437696 39.7509165247419  
 42.0126083977597 39.8455060654531 42.6366765186182 38.0958223740111  
 TEX15 34.4896350146096 40.3384318592985 37.8386378737561 38.6414316877471  
 38.745552403895 42.6575535390785 43.8206425661746 37.9837233601316  
 36.4476883897928 33.6188027862739 41.1638563416981 42.2577689927563  
 TEX2 221.015209694864 101.426462865382 148.027258506301 169.582135138401  
 227.94699237549 266.178061771978 131.39588569388 188.196662406725  
 213.520663841371 248.414210905199 243.803668806533 261.6201598868  
 TEX261 93.8361140725228 77.4676205299631 81.2850357499192  
 79.1000897258245 111.573111498905 79.6895408438974 79.5707751325986  
 116.184007615285 87.036020750455 107.501868837432 90.9641417408475  
 73.408861359425  
 TEX264 92.4896666046729 133.074560812703 136.125236142909  
 146.405413944753 134.713725350463 122.284299477218 184.087380444203  
 65.4714272652857 153.059039745191 129.081183929988 155.795095438102  
 137.239944506217  
 TEX28 44.5282181324797 43.5873188565519 37.5597671487621 41.1886975241176  
 44.147557390293 43.5752393599169 38.2933870238743 41.5464765641928  
 44.1519466943185 39.4710743516517 44.0409178714232 46.1592873342534  
 TEX9 42.6575535390785 37.5469247328848 40.8420925848403 46.4555908533915  
 39.7568367479301 44.7804080899431 45.9635923776719 47.8947595316832  
 47.1744296124496 42.5193208629123 45.1778228816327 42.1537476443423

|         |                  |                  |                  |                  |
|---------|------------------|------------------|------------------|------------------|
| TF      | 48.0201377454632 | 45.3486182278177 | 45.5883690965192 | 46.8954576545929 |
|         | 44.5668141895992 | 55.9351706773613 | 42.4939802311136 | 46.4672637826582 |
|         | 39.7537274655115 | 47.8207974930031 | 45.5707650534259 | 41.863927676552  |
| TFAM    | 198.288493088076 | 223.397586938079 | 206.337508331566 | 200.591114641608 |
|         | 254.322611819303 | 192.398575159246 | 154.93193897888  | 216.911833562615 |
|         | 247.356027979377 | 208.943204358024 | 177.088290547513 | 195.654315886452 |
| TFAMP1  | 40.7609952437622 | 40.7952353240579 | 35.0970060242246 |                  |
|         | 38.745552403895  | 37.3508690072156 | 38.1169703906207 | 37.830876898596  |
|         | 44.4031868028216 | 36.9060997041453 | 40.7063426028871 | 37.9230440150891 |
|         | 38.1421709520616 |                  |                  |                  |
| TFAP2A  | 76.3334723210842 | 80.6844261396045 | 234.359144097839 |                  |
|         | 62.0404348860702 | 65.7321440516177 | 48.8266530503117 | 80.4967881959046 |
|         | 79.1576305054224 | 136.959977512354 | 76.5375674421131 | 71.6354627933716 |
|         | 73.5161632100822 |                  |                  |                  |
| TFAP2B  | 41.2424637338424 | 39.8455060654531 | 41.437237454134  |                  |
|         | 36.264823544143  | 35.7973685350741 | 35.0970060242246 | 43.1602899171656 |
|         | 38.6454098044474 | 46.2027193115397 | 39.6251842352088 | 40.1362682639916 |
|         | 40.716553247236  |                  |                  |                  |
| TFAP2C  | 161.603201688692 | 87.1434190022564 | 93.310557793228  |                  |
|         | 64.5904539744585 | 94.7604013126314 | 52.2089306840125 | 106.771536005741 |
|         | 411.254448823371 | 136.377736482671 | 105.783933158577 | 94.1575209300592 |
|         | 106.020559220488 |                  |                  |                  |
| TFAP2D  | 45.2875173643252 | 36.5219488315447 | 41.2365089689635 |                  |
|         | 40.646702696033  | 42.7982502551634 | 47.0940613507321 | 38.4005795891396 |
|         | 38.745552403895  | 39.2809305246091 | 39.7835513496873 | 38.956280281655  |
|         | 40.1700117452801 |                  |                  |                  |
| TFAP2E  | 37.3463875295726 | 37.6383530120621 | 41.437237454134  |                  |
|         | 41.1886975241176 | 41.2740822675592 | 42.750861693377  | 36.634024014558  |
|         | 47.3791873993182 | 45.1899271235974 | 45.7911932481722 | 40.0766543123257 |
|         | 41.1554481567603 |                  |                  |                  |
| TFAP4   | 43.7585538437696 | 49.7363778831003 | 45.310660704531  | 40.4359177791566 |
|         | 49.5666074434383 | 48.9826868640753 | 48.6395795163502 | 39.9576138799997 |
|         | 54.4059109100338 | 58.7198210787055 | 52.022479439889  | 51.7833333848627 |
| TFB1M   | 158.042994416158 | 156.433762355183 | 156.53223142598  | 135.138667957956 |
|         | 98.403191200835  | 98.501431740607  | 132.689951767479 | 82.0102749744973 |
|         | 116.839274984089 | 132.710335836559 | 140.063595285844 | 141.255712367708 |
| TFB2M   | 128.281765653795 | 305.959643033169 | 206.989423961124 | 149.055511050346 |
|         | 335.818251279914 | 160.459991480576 | 202.192457390868 | 143.773311381452 |
|         | 282.68881112438  | 137.057972437595 | 134.447479156221 | 200.790001763897 |
| TFCP2   | 109.029196594263 | 186.818097299665 | 208.269627315418 | 169.99300253813  |
|         | 174.148714092395 | 171.468580016846 | 191.223290474417 | 276.795797048951 |
|         | 292.86576686019  | 211.421222959783 | 194.644164648125 | 204.273912273411 |
| TFCP2L1 | 43.3638918705225 | 73.6855877240541 | 45.5883690965192 |                  |
|         | 43.5627649099623 | 81.3759380182158 | 41.6590564937735 | 100.139490974785 |
|         | 112.805898501551 | 68.6379135603075 | 147.444007777385 | 87.539553421006  |
|         | 85.1114448808779 |                  |                  |                  |
| TFDP1   | 312.7217964763   | 667.583623414832 | 515.409979010663 | 374.167501183341 |
|         | 945.065986430527 | 366.326747630465 | 621.980260052085 | 235.888544042065 |
|         | 510.232992765054 | 159.359051158123 | 193.094756585577 | 290.524288545599 |
| TFDP2   | 57.4777075615651 | 47.5647821785529 | 51.9490810272761 | 40.8084239472012 |
|         | 70.506090074243  | 63.4176152858138 | 65.7196733766698 | 53.9465584609317 |
|         | 58.4476706144086 | 54.2830238965339 | 56.3516844446941 | 57.2350830635912 |



|        |                  |                   |                  |                  |
|--------|------------------|-------------------|------------------|------------------|
| TFDP3  | 35.7012997405508 | 41.3610369241157  | 39.3709357615493 | 45.4634652319753 |
|        | 44.6834648302383 | 40.5281496800812  | 36.5352572191451 | 48.5681478665796 |
|        | 43.4656637536244 | 34.8137085420423  | 41.7272875295469 | 45.3763275588341 |
| TFE3   | 75.2475238554276 | 74.9059650336395  | 78.8357122967692 | 83.2925226467532 |
|        | 60.1730663840476 | 92.2772139468085  | 69.6301237585571 | 67.5206810636627 |
|        | 73.4853298204744 | 89.8035133597498  | 76.4389426517528 | 85.6964911093755 |
| TFEB   | 46.5549623118323 | 45.4143854024453  | 54.6051538001037 | 54.6089451252049 |
|        | 34.7018263647985 | 47.2927436772465  | 38.8417151851134 | 38.6454098044474 |
|        | 46.7760357462635 | 59.4309046716701  | 53.9517841438975 | 46.4499258373233 |
| TFEC   | 39.0325254636537 | 41.0269624684418  | 40.438572186867  | 43.4933087941017 |
|        | 41.9322044100235 | 42.799989590625   | 44.0256815382334 | 42.9301944191913 |
|        | 41.0381860307445 | 36.1028268208831  | 39.5847121472157 | 40.9058811573481 |
| TFF1   | 41.4508241771315 | 557.979646421047  | 8703.02873382565 | 106.20479137406  |
|        | 42.9090346219023 | 216.699423864285  | 45.6042625176633 | 119.474339360208 |
|        | 54.8946088631931 | 38.3092241935352  | 49.4593570700221 | 60.1837189855762 |
| TFF2   | 38.1169703906207 | 196.844428284247  | 216.247225354243 | 37.651298468202  |
|        | 46.3150221024046 | 41.159706131351   | 42.4939802311136 | 48.6441988290952 |
|        | 57.2716485658185 | 39.5637454855233  | 45.5707650534259 | 43.2776458914333 |
| TFF3   | 52.0299937917925 | 131.537639104397  | 224.373975368936 | 84.6435656850129 |
|        | 47.8075998240396 | 429.854222129819  | 40.1235656101329 | 51.0724630072723 |
|        | 83.2563086075874 | 164.462951076718  | 282.328238928883 | 107.799236230743 |
| TFG    | 640.78586776574  | 444.320714312359  | 419.360641528378 | 409.899024157206 |
|        | 638.848775860866 | 424.87896140215   | 675.079525434102 | 211.109957714241 |
|        | 561.855286945959 | 356.025084823326  | 316.327885002562 | 311.1022748407   |
| TFIP11 | 155.075313035867 | 92.6888475289584  | 119.263603432127 |                  |
|        | 150.221698290502 | 108.400712514743  | 107.211374033204 | 150.709301569371 |
|        | 122.482560090133 | 118.762101740563  | 121.423421895502 | 116.17375251898  |
|        | 100.344513700137 |                   |                  |                  |
| TFPI   | 115.044790975532 | 90.1032802171477  | 162.272853632419 | 194.951677338012 |
|        | 103.720371491639 | 273.934014944673  | 76.0975301977715 | 108.111248374368 |
|        | 75.6103053700122 | 140.128033028434  | 120.980558571109 | 171.623830248512 |
| TFPI2  | 44.9896851005259 | 40.2493681589104  | 36.769073068743  | 46.3203995372658 |
|        | 46.1804647841331 | 48.5835484742456  | 44.3440839686558 | 51.1694248620208 |
|        | 40.4220196471124 | 43.4885245598939  | 42.8263096141654 | 42.1537476443423 |
| TFPT   | 128.04037427867  | 172.801059111314  | 169.001200403896 | 218.217851814655 |
|        | 188.408367998553 | 169.061093538895  | 192.470747766298 | 200.524777333743 |
|        | 240.55212989103  | 110.219274023648  | 120.418406532204 | 115.064217549212 |
| TFR2   | 49.2595762436995 | 46.6314009405034  | 53.7792717770978 | 41.1886975241176 |
|        | 38.6454098044474 | 44.2607789091176  | 38.4005795891396 | 39.1652965788406 |
|        | 51.8824384192988 | 42.5664883002833  | 39.7342718293432 | 43.6753843488695 |
| TFRC   | 798.515089763944 | 460.865101118125  | 550.100918659768 | 2854.82112538867 |
|        | 2393.42629339901 | 729.755556260103  | 1921.48678333837 | 1845.34855798442 |
|        | 3502.80810319252 | 541.631969808467  | 566.318259999405 | 609.797179957996 |
| TG     | 44.2350046179299 | 47.9665737016961  | 47.4740726032707 | 42.9358255168086 |
|        | 48.3814421939888 | 45.1873487463472  | 40.1235656101329 | 41.8417024632349 |
|        | 44.0519245668737 | 51.0055825931636  | 41.4508241771315 | 45.2783024981315 |
| TGDS   | 118.762101740563 | 101.277664841914  | 121.510087314197 | 121.104663867264 |
|        | 115.676508349703 | 116.51037006692   | 99.5844079573552 | 82.0102749744973 |
|        | 103.513421757522 | 123.301491241188  | 115.827601697699 | 140.076084766156 |
| TGFA   | 70.6065558064758 | 52.7948184519106  | 92.8951148347802 | 102.053879707074 |
|        | 71.5345397102823 | 55.5887949773838  | 163.877163712385 | 174.985336606027 |
|        | 122.952515297686 | 105.5039254445543 | 102.993620677265 | 113.964753321316 |

|          |                  |                  |                  |                  |
|----------|------------------|------------------|------------------|------------------|
| TGFB1    | 35.7012997405508 | 42.1607322031054 | 43.7630587657205 | 47.0874209746031 |
|          | 39.0564222526273 | 40.040778349137  | 32.7676164492555 | 45.7476095696859 |
|          | 41.863927676552  | 37.0320432433314 | 43.4709415392696 | 42.9887069977696 |
| TGFB1I1  | 109.677588309718 | 69.6693950681855 | 77.1900613562529 |                  |
|          | 74.5065528806984 | 67.40251451399   | 279.841798764418 | 51.3064929551674 |
|          | 60.3597249466312 | 47.5564423692142 | 156.95090716929  | 159.571799428131 |
|          | 111.025105784166 |                  |                  |                  |
| TGFB2    | 46.5549623118323 | 47.4740726032707 | 48.3847843498476 | 59.4674205670657 |
|          | 39.2608760193011 | 46.263826584899  | 46.9929836306816 | 47.7889447429963 |
|          | 49.9951674107458 | 44.6918600441328 | 43.9450023643394 | 48.4535991392809 |
| TGFB3    | 224.827414462257 | 66.1288889125299 | 80.0183739952818 | 185.28845113422  |
|          | 67.8233625051884 | 313.594031411352 | 41.0381860307445 | 78.1448136847078 |
|          | 52.4539007817929 | 216.004059887037 | 142.124053129543 | 298.924873508403 |
| TGFBI    | 3905.8371644287  | 871.238169066998 | 359.185856400148 | 3592.44409869527 |
|          | 1771.43541011426 | 1026.51177853708 | 394.990145259101 | 1524.01520893763 |
|          | 253.605641311356 | 1485.68317899614 | 592.010988342149 | 1442.72006787259 |
| TGFBR1   | 42.7150227340364 | 38.6414316877471 | 40.0998167098057 |                  |
|          | 48.4916117779992 | 42.9090346219023 | 42.157627240486  | 38.8417151851134 |
|          | 53.838484549134  | 49.5539622682049 | 40.7063426028871 | 44.2925355984056 |
|          | 45.5800840647989 |                  |                  |                  |
| TGFBR2   | 287.121456559795 | 338.72596574658  | 311.1022748407   |                  |
|          | 394.437597863822 | 298.14782785085  | 642.211963248041 | 175.632783805966 |
|          | 218.273094883881 | 201.027801320306 | 592.989860385203 | 663.904584382358 |
|          | 647.868022835702 |                  |                  |                  |
| TGFBR3   | 92.3659612653822 | 370.568550943181 | 275.611524861938 |                  |
|          | 174.860894067053 | 352.600793906035 | 1465.08435775014 | 209.860757709908 |
|          | 315.799449362526 | 425.895919304186 | 1707.92349760322 | 1864.63057767867 |
|          | 1570.45778081591 |                  |                  |                  |
| TGFBRAP1 | 60.9710783023013 | 102.053879707074 | 100.824660338235 |                  |
|          | 67.474556589181  | 114.888828460086 | 77.1317865202676 | 91.5258329186709 |
|          | 61.5000955267432 | 59.1223319112238 | 58.9069025298754 | 72.6731815563159 |
|          | 69.6021553604792 |                  |                  |                  |
| TGIF1    | 135.973016473297 | 209.038077542654 | 119.434418653131 | 184.377148097206 |
|          | 196.096147690942 | 100.756165194192 | 205.449627031002 | 219.34503297115  |
|          | 212.117653688186 | 85.9179359178373 | 93.2484615907966 | 147.043419185015 |
| TGIF2    | 78.9028182143923 | 84.4596873416863 | 66.0411740221276 | 74.0093517743852 |
|          | 120.465621774337 | 67.9306669919176 | 91.3607028449916 | 69.9709625205629 |
|          | 80.2680308979464 | 60.2877434874622 | 65.8748459696377 | 59.0894921452893 |
| TGM1     | 40.5654775358427 | 48.109747794187  | 46.3411353377615 | 36.5393857306744 |
|          | 48.5000946421718 | 39.6251842352088 | 38.0598374201407 | 46.0633179231318 |
|          | 51.6731332961917 | 44.3648993568405 | 37.9946685306274 | 45.9693232070002 |
| TGM2     | 138.748233664345 | 99.8063480813138 | 79.3066495980045 | 317.127679512963 |
|          | 109.310200749289 | 195.168348967505 | 67.3469281984384 | 121.510087314197 |
|          | 49.5265949137207 | 115.853867920678 | 106.985301705486 | 236.178265404264 |
| TGM3     | 44.8914371498528 | 39.9697332660833 | 44.4311655729487 | 94.7283425282671 |
|          | 38.5512429290626 | 37.2686490268265 | 52.4111687156893 | 38.4540849632254 |
|          | 36.4476883897928 | 39.1621898366355 | 38.5668610487033 | 41.0657892043496 |
| TGM4     | 34.8099089553046 | 40.5400384479766 | 41.1367478979484 | 40.1804147506786 |
|          | 38.6454098044474 | 38.4330755397458 | 37.4772922422734 | 37.5511560880902 |
|          | 38.9006788676407 | 38.6454098044474 | 37.2018803984555 | 39.4490233720848 |
| TGM5     | 43.8550481835503 | 42.281606728072  | 40.5289532121417 | 39.066284740632  |
|          | 42.0709558258414 | 38.8336427948187 | 41.2040352443154 | 40.7311497914871 |
|          | 45.9227107476843 | 60.920620198708  | 44.1478805895017 | 41.6550823405646 |

|        |                  |                  |                  |                  |
|--------|------------------|------------------|------------------|------------------|
| TGM6   | 39.3709357615493 | 39.8695929627783 | 35.6139301508335 | 43.4410741327254 |
|        | 38.6454098044474 | 48.3686935595826 | 53.4921736109774 | 41.6466169548846 |
|        | 41.5635499110307 | 44.8997235283254 | 41.0808257270221 | 36.3454320848591 |
| TGM7   | 37.7384958256497 | 40.8880530359822 | 45.1569741609597 | 42.4580504587581 |
|        | 38.2496050953547 | 38.9378717994178 | 43.0930293831497 | 38.8495095797881 |
|        | 43.8482802038826 | 41.1222709786153 | 39.3667161654772 | 42.6758568421347 |
| TGOLN2 | 309.022069786139 | 630.53864514662  | 351.188432232165 |                  |
|        | 560.802447943839 | 293.258858033133 | 564.929183025034 | 400.327164003217 |
|        | 372.758184542037 | 259.769260154253 | 454.402224020514 | 410.979796414875 |
|        | 516.076634990003 |                  |                  |                  |
| TH     | 101.036327583799 | 125.997088252817 | 56.3471340054074 | 38.8495095797881 |
|        | 52.0583273941813 | 48.260931742163  | 69.1414574152997 | 44.9977782988116 |
|        | 334.639325701194 | 77.1767494799711 | 83.9647518349407 | 98.0473811574767 |
| TH1L   | 351.290929267326 | 744.080606078086 | 810.021622878441 | 256.675896425075 |
|        | 789.511653564341 | 412.694325761831 | 810.021622878441 | 754.700295017212 |
|        | 757.545320379227 | 390.331295238889 | 586.735744054398 | 446.37035118289  |
| THADA  | 99.5058761858884 | 95.1818735488388 | 98.0864897427459 | 81.9504925867759 |
|        | 88.6057390890775 | 94.1844708285913 | 114.84900130932  | 141.784776736918 |
|        | 103.423003544792 | 94.1575209300592 | 116.388069891158 | 86.9924799927707 |
| THAP1  | 62.8270556619309 | 60.3381680822012 | 58.9135553403521 | 60.0765286625112 |
|        | 56.1806416223547 | 74.0995052892511 | 55.8019623191927 | 47.0940613507321 |
|        | 64.1267046511632 | 53.4109882045447 | 58.0139597055449 | 64.1158872395764 |
| THAP10 | 82.0292880742189 | 70.7702047405718 | 67.0421310720934 |                  |
|        | 51.0175677516029 | 103.913834330352 | 83.955786676926  | 113.692418102755 |
|        | 96.9880759408512 | 95.7194132679937 | 85.9910479975356 | 80.3500323413132 |
|        | 86.5564881117807 |                  |                  |                  |
| THAP11 | 413.31638457585  | 477.410937135204 | 602.726022292973 |                  |
|        | 338.415128695208 | 512.255695437272 | 422.474427987338 | 414.539381761279 |
|        | 324.126628444078 | 491.8684831079   | 388.661268904002 | 352.246108891022 |
|        | 442.380936516984 |                  |                  |                  |
| THAP2  | 42.3433931248155 | 41.8848959280916 | 42.3536549114165 | 44.6905691366696 |
|        | 41.1868052124344 | 43.9724628401189 | 44.7255207589606 | 43.844855336215  |
|        | 42.846832824953  | 41.7405682794166 | 42.7775752471711 | 46.1088006335399 |
| THAP3  | 43.0001432913058 | 43.5182502375207 | 42.0621425894624 | 42.6913548400127 |
|        | 46.5557478175976 | 46.263826584899  | 42.4939802311136 | 48.5681478665796 |
|        | 43.6670755115848 | 42.0621425894624 | 43.844855336215  | 42.8864415494484 |
| THAP4  | 40.2543341073001 | 49.4982025424177 | 60.7530213660442 | 44.550322123994  |
|        | 53.8260140375214 | 49.3172204533818 | 52.2476631126873 | 38.6454098044474 |
|        | 64.2174369755376 | 40.8970401536578 | 43.5710871617107 | 55.2449003905956 |
| THAP5  | 39.9220998751503 | 39.1982470626863 | 41.4613628725541 | 39.9084621723809 |
|        | 40.0599807618105 | 40.9506062495231 | 41.1507980856436 | 42.0494116081998 |
|        | 40.7460990419215 | 40.7620472083159 | 40.1742127891824 | 44.4475838947656 |
| THAP6  | 58.651329686676  | 61.6878176260761 | 74.4508307047509 | 67.1961800572759 |
|        | 84.5572894783679 | 80.5478617156852 | 57.4047331041592 | 66.1288889125299 |
|        | 53.3094843669564 | 66.274247400793  | 66.0282565447846 | 73.0333258448698 |
| THAP7  | 63.7417623042104 | 64.120219344545  | 65.8028755495823 | 57.8277957325085 |
|        | 65.9189023794337 | 88.4695322145032 | 93.3897477314201 | 64.8336014343435 |
|        | 81.9504925867759 | 88.6905706130505 | 83.8637731385607 | 69.8505620106065 |
| THAP8  | 42.0532901689036 | 39.6123051184545 | 36.769073068743  | 40.5484717678957 |
|        | 42.9090346219023 | 40.6507422261428 | 37.7136011474903 | 36.3405039629059 |
|        | 44.4395580493118 | 51.9547984751408 | 40.723990462047  | 44.3521099857368 |
| THAP9  | 43.7585538437696 | 38.3322849790657 | 37.1643693306382 | 40.1804147506786 |
|        | 33.5412189543102 | 43.9724628401189 | 43.4544762830742 | 38.3684202018524 |
|        | 47.0804681460898 | 40.2112371512838 | 50.2203578628217 | 39.6352613956998 |

|        |                  |                  |                  |                  |
|--------|------------------|------------------|------------------|------------------|
| THBD   | 38.0089018744739 | 81.0331497830643 | 58.112348043634  | 154.509548705054 |
|        | 46.6397391251762 | 75.1674447943072 | 41.9393838138203 | 48.5681478665796 |
|        | 40.4997186069494 | 39.6719190054379 | 41.5421429082231 | 45.7562276914441 |
| THBS1  | 1102.03940742413 | 655.389317052689 | 307.922754395377 | 1139.81870068001 |
|        | 664.453262499828 | 1480.95754707554 | 173.694418385132 | 687.011162822211 |
|        | 169.633672522325 | 134.152059562322 | 189.035121001539 | 986.40790007743  |
| THBS2  | 3296.66056024983 | 384.280434953152 | 782.28158356937  | 685.386956092142 |
|        | 1176.37732422904 | 432.669787408904 | 788.950470077369 | 372.239177888445 |
|        | 59.4236178078244 | 2061.66570137425 | 2248.64628069362 | 2206.44541412808 |
| THBS3  | 55.1306642449627 | 42.1607322031054 | 58.7382738968248 | 41.7614975630362 |
|        | 53.1884505015411 | 63.3612993417558 | 46.0228732507872 | 51.2623287419357 |
|        | 48.9931786790166 | 67.3308332069908 | 49.532546810992  | 56.9379721393904 |
| THBS4  | 56.5094373275922 | 45.1694246393676 | 42.5406888281114 | 44.0451487108213 |
|        | 43.1252272136667 | 54.2503023961401 | 43.1931731665131 | 45.3872406432794 |
|        | 40.7847110517594 | 47.8207974930031 | 45.2265319826548 | 39.8497227447888 |
| THEG   | 46.7704450730477 | 46.9578963946094 | 44.0451487108213 | 45.334106390212  |
|        | 45.5198200633333 | 42.8598805316863 | 47.0874209746031 | 44.4475838947656 |
|        | 44.5678064264717 | 43.7303813515864 | 42.9634662926872 | 44.1861590259178 |
| THEM2  | 295.312692092025 | 192.732356915298 | 303.818507395434 | 283.88971280023  |
|        | 355.7118155732   | 224.069916407012 | 708.839262759372 | 510.946850892298 |
|        | 238.338646661062 | 161.109600577001 | 141.206849814363 | 210.843643231855 |
| THEM4  | 52.5792653122861 | 53.6429962450784 | 53.7792717770978 | 40.0698728584484 |
|        | 66.7426485694967 | 43.7630587657205 | 52.7002314230604 | 50.857522488428  |
|        | 49.5539622682049 | 65.3377940117969 | 54.113533179847  | 46.0633179231318 |
| THEM5  | 35.4287975493553 | 37.7384958256497 | 42.5406888281114 | 44.0451487108213 |
|        | 40.0599807618105 | 40.3357777530419 | 39.7576136507593 | 41.6466169548846 |
|        | 42.0621425894624 | 43.844855336215  | 41.3553369544097 | 38.4330755397458 |
| THEX1  | 37.55264801907   | 34.15544299189   | 38.3166554965434 | 37.8442841690502 |
|        | 33.2021437980841 | 32.9046688061235 | 36.8369172900902 | 31.5766875248365 |
|        | 35.2143190355414 | 34.8137085420423 | 34.266241549578  | 33.4316681623175 |
| THG1L  | 57.7877627794725 | 60.0601788842942 | 64.1777305915695 | 61.5515639412892 |
|        | 53.6907197364586 | 63.4610447573417 | 59.5205055437765 | 73.0394191668858 |
|        | 80.2680308979464 | 104.288073521816 | 86.2670415958076 | 74.8170892324966 |
| THNSL1 | 65.0721641331632 | 44.6918600441328 | 57.6371756925687 |                  |
|        | 63.4531374125233 | 103.080153415433 | 68.9562915755919 | 73.8313212063649 |
|        | 68.9522412475296 | 109.241121384212 | 82.966263655525  | 61.5392012551041 |
|        | 80.0381580139229 |                  |                  |                  |
| THOC1  | 180.349984862124 | 120.825113658705 | 111.397578350396 | 119.39177524986  |
|        | 176.064476306748 | 129.190555260332 | 185.474249522831 | 210.032782918825 |
|        | 136.998739859195 | 164.462951076718 | 145.847014515246 | 158.853244260329 |
| THOC2  | 80.7067505750848 | 84.3401431994754 | 88.5601339449828 | 119.015431849218 |
|        | 107.490296194878 | 97.5736219666974 | 137.438636654385 | 211.596652798395 |
|        | 74.6955454743937 | 129.887275668509 | 114.959624673123 | 115.861269747317 |
| THOC3  | 158.195749606017 | 101.020328028769 | 204.710892826638 | 81.929796716054  |
|        | 226.580055691897 | 121.120217132666 | 251.4927207704   | 247.843927763772 |
|        | 192.171116215791 | 78.0006681166995 | 83.6438735616921 | 143.913007288353 |
| THOC4  | 118.49449420132  | 228.254228465645 | 161.471040999844 | 152.942332679485 |
|        | 221.972553229362 | 127.836645375421 | 298.771150048863 | 102.314704593905 |
|        | 201.657389063895 | 48.4243229779413 | 80.2774079897733 | 90.4160198134865 |
| THOC5  | 185.395460281034 | 213.590067519021 | 186.350104132737 | 168.288592321667 |
|        | 183.77850568836  | 277.069127740648 | 230.142262693206 | 219.805214090875 |
|        | 140.860068375212 | 227.817928402227 | 193.703214707909 | 164.312946712409 |

|        |                  |                  |                  |                  |
|--------|------------------|------------------|------------------|------------------|
| THOC6  | 145.30915313164  | 149.494335028498 | 168.640033281185 | 130.908206625954 |
|        | 102.913039837094 | 105.414552529943 | 135.398193235699 | 67.0904616289706 |
|        | 175.099998331811 | 138.637058021129 | 158.478919789334 | 115.676508349703 |
| THOC7  | 475.159378115819 | 910.898566308567 | 886.397061577531 | 627.914461428624 |
|        | 862.031722874406 | 1096.1705171588  | 889.638287212686 | 625.805967352327 |
|        | 844.431085166353 | 528.840700144811 | 547.442608452594 | 903.756866967447 |
| THOP1  | 209.281870980564 | 240.086349973689 | 173.49425401442  | 145.073599404007 |
|        | 442.711822532078 | 158.532307373857 | 275.928723831899 | 272.022473793857 |
|        | 169.144145421022 | 149.173801572239 | 176.687970262952 | 108.750364850147 |
| THPO   | 39.5676051939342 | 41.159706131351  | 34.3633615460307 | 41.5464765641928 |
|        | 40.2449343247539 | 34.0045980663271 | 38.941855825269  | 38.745552403895  |
|        | 33.8558232866797 | 40.6022003765153 | 38.8507804383261 | 39.6352613956998 |
| THRA   | 182.52420078643  | 47.2258994932516 | 43.0697338561114 | 54.3659493975064 |
|        | 41.4273122914951 | 110.440072569721 | 45.9426591985894 | 48.5089868936195 |
|        | 64.6629780915974 | 70.1347490781514 | 71.0369238830779 | 60.8161720561234 |
| THRAP3 | 57.6285775590145 | 58.0218262176065 | 44.6032218589199 |                  |
|        | 57.8277957325085 | 62.046151104685  | 56.9320717885002 | 59.5205055437765 |
|        | 65.3019328668633 | 63.1944558106132 | 41.9666541498638 | 59.1443775199516 |
|        | 52.8455400026194 |                  |                  |                  |
| THRAP5 | 51.2851682978581 | 51.3084273211359 | 50.1860191642359 |                  |
|        | 57.0629653735694 | 67.0163226819964 | 47.8636003588181 | 39.6535880152834 |
|        | 65.1637149462661 | 48.5792058061372 | 55.6865353018811 | 59.6608518093582 |
|        | 50.7487159427973 |                  |                  |                  |
| THRB   | 33.9561816279577 | 37.2810767789306 | 32.8745892439217 | 34.1051821768421 |
|        | 37.0526522140242 | 33.895835691032  | 36.08956004634   | 34.9580369221164 |
|        | 35.0305278582179 | 34.2638875325204 | 31.0126568324233 | 43.5738557773903 |
| THRSP  | 42.6036491382658 | 32.4552405279874 | 39.3709357615493 | 41.4273122914951 |
|        | 39.6535880152834 | 45.1873487463472 | 37.830876898596  | 38.5457716679071 |
|        | 45.1899271235974 | 39.7835513496873 | 36.5359455830388 | 34.6720534245631 |
| THSD1  | 41.1090481599939 | 41.4508241771315 | 45.0017158586743 | 44.3557408297309 |
|        | 40.8351751854504 | 41.400731343457  | 41.8887298788489 | 43.579462900311  |
|        | 40.2669497398702 | 40.1179210534118 | 45.1846041469628 | 44.4004151500264 |
| THSD1P | 37.55264801907   | 40.5400384479766 | 43.1660110696573 |                  |
|        | 40.7481155008596 | 40.6308525754377 | 44.9896851005259 | 37.4772922422734 |
|        | 40.2770232552555 | 39.3750969348308 | 40.1179210534118 | 41.4860822396574 |
|        | 42.1860813954352 |                  |                  |                  |
| THSD3  | 36.178547300352  | 35.5999495928832 | 34.083122489162  | 36.9456005425764 |
|        | 41.9495387255163 | 38.5642488933115 | 41.5421429082231 | 36.2539950294089 |
|        | 37.0126425326534 | 36.7481940145087 | 36.7800683777849 | 38.2350720635382 |
| THSD4  | 60.4593810615882 | 49.6203214143464 | 51.7138050344355 | 46.614092935749  |
|        | 47.8075998240396 | 48.9826868640753 | 46.4388841354122 | 54.1731035633439 |
|        | 59.0563795877672 | 73.4447529556358 | 64.6446465846487 | 71.2491135258076 |
| THSD7A | 40.3478825593224 | 39.0894172982439 | 39.0775870687758 |                  |
|        | 34.1051821768421 | 38.1644569189523 | 44.4619248757502 | 33.8558232866797 |
|        | 43.844855336215  | 43.5669306063196 | 39.6719190054379 | 39.6403089864678 |
|        | 39.2469742642337 |                  |                  |                  |
| THSD7B | 38.7537364570873 | 42.0500582486532 | 36.5201388311834 |                  |
|        | 44.4954892619459 | 44.4489662507893 | 43.7078399718247 | 41.3594868055879 |
|        | 36.9355798143571 | 53.41889323316   | 39.8455060654531 | 43.0971787292711 |
|        | 39.4830039788612 |                  |                  |                  |
| THTPA  | 44.5282181324797 | 46.4861258030402 | 37.9482157381008 | 47.3574589211166 |
|        | 44.3557408297309 | 44.9896851005259 | 46.5650556481721 | 40.7311497914871 |
|        | 44.2607789091176 | 41.2276963324981 | 49.9338905397767 | 40.5703581862752 |

THUMPD1 94.080489738662 81.4269715766354 110.362432903746  
 94.8260360398356 93.7924763988692 142.731630650904 82.3364971911816  
 122.924027019519 111.643323610073 100.076931518374 104.17651993553  
 124.338989399317  
 THUMPD2 154.911548311992 96.2280884890067 122.531570028682  
 84.6435656850129 121.204795052893 105.525194437454 105.802035886293  
 111.773296155783 125.494065483032 122.702789229752 112.707612911654  
 118.762101740563  
 THUMPD3 59.8248482438562 66.9524703393018 55.2141529491512  
 51.3851157261451 76.8964050504238 74.0995052892511 54.6414321010929  
 81.4881766238989 66.4251023257203 56.057906531592 55.7868713984479  
 65.8959431201418  
 THY1 1436.67510926345 445.421601813221 375.529704925121 527.830011424742  
 314.782545392841 321.26586939039 66.1940959364976 178.624349589089  
 62.7977686460693 174.303754116679 75.1853590860646 85.6038071277319  
 THYN1 155.519517541864 155.888873407786 234.232348771362 122.702789229752  
 216.744244428166 168.366869831376 168.426372075344 190.161505611036  
 171.992427227088 151.245804544502 155.617122020913 199.634544522948  
 TIA1 227.404530886674 239.96421556928 246.924485443224 116.953646515589  
 259.033660186329 132.84476910529 181.814283147675 217.425223098994  
 166.752205770965 103.707931766117 115.496195377983 160.442808769594  
 TIAF1 290.371909722404 144.500148287951 176.936216428226 200.144817111902  
 127.50316411791 148.529482776555 126.115065200084 295.5163490537  
 230.401917528056 213.028412890553 210.255784687052 174.332103484796  
 TIAL1 88.1494891612632 106.443777149496 98.6177995580785 96.8490167966217  
 117.502489192855 68.9038222450855 108.855682928578 99.1438953564062  
 92.2857885595617 87.5573893277742 87.4496384021871 108.815245119101  
 TIAM1 58.1868359012515 85.5135159896819 74.2769881586739 61.0845101400379  
 113.444217634165 58.4435847520801 91.3607028449916 92.227126770051  
 83.2925226467532 62.3233491851723 69.4877749654481 74.9294208313176  
 TIAM2 61.4416707689893 47.4617077792004 46.1653991089885 58.4476706144086  
 46.7508829977587 59.5573227689649 42.2577689927563 46.0106098064475  
 40.6503965580437 74.6847594297153 66.1448688879431 51.4308501933893  
 TICAM1 144.863548409034 212.813224717262 199.007437365676  
 236.536058101486 355.319959025243 172.102568448455 225.201522281399  
 155.464685445566 206.41879845205 153.177725521199 165.820230766206  
 148.944852825695  
 TICAM2 129.785929766258 78.806097512943 112.159199477006  
 209.497482517298 73.1654226019863 123.176449895397 75.0665411373616  
 76.3509533017572 81.4783226003925 138.521956104698 117.234047261125  
 94.5501397951415  
 TIE1 47.3791873993182 54.7855575216687 68.8098607236981 50.5310598656998  
 51.5888395924843 53.9517841438975 35.6056062164318 39.3709357615493  
 40.7847110517594 43.401782064778 47.0110068985119 46.0633179231318  
 TIFA 55.8218917166321 51.1740855632044 55.2141529491512 65.7321440516177  
 46.1804647841331 59.4949177415847 67.1926218405833 42.157627240486  
 78.4428909886495 49.1928206164702 50.1649089793069 69.4383198054368  
 TIFAB 40.2087556903277 45.9266745571724 40.0557788909923 45.2759158146116  
 44.2607789091176 43.8582747295766 43.4544762830742 39.5954353681031  
 42.2577689927563 42.4594149893798 41.1638563416981 39.4490233720848  
 TIGA1 524.047008889711 541.105845300009 714.532923535126 380.736562250846  
 405.148979342648 1237.93130196998 449.701353531924 514.853892585612  
 523.25106120389 1335.4111951034 1561.83892117664 1032.44965920118

TIGD1 53.7507429765038 37.5469247328848 40.5734458834617 35.6027791404152  
42.3685136297603 45.6129956328415 40.2154497375715 39.9576138799997  
39.3750969348308 42.8936990772838 44.3763859390287 49.3984571719129  
TIGD2 83.7215159198897 90.1632837282491 67.7235257493648 70.7202372217584  
103.356071080819 62.2818512646893 110.837476359817 119.301672388541  
137.831070407907 67.4760456862775 82.3364971911816 77.707180044659  
TIGD3 39.0620487644635 43.0971787292711 38.6005272730664 41.1886975241176  
34.3633615460307 42.157627240486 37.1643693306382 42.157627240486  
38.8271346375425 43.1839109702714 36.5359455830388 35.1451084093692  
TIGD4 32.9174234020987 38.7344853699576 40.5734458834617 40.646702696033  
35.9894133432376 42.2577689927563 35.0305278582179 40.4359177791566  
42.0621425894624 37.6383530120621 38.5668610487033 37.9607839934735  
TIGD5 214.073500272341 268.265540230814 156.174166381986 98.5663841503803  
245.489660195494 109.943883439481 206.989423961124 83.7829283976292  
241.677456498713 157.394782571468 144.300051706447 82.6796854569122  
TIGD6 49.7827734675743 42.6939394537076 45.8844325913247 45.5869891570251  
44.8897737954573 42.357910063876 45.7452456977857 45.4757965005055  
49.2879849674517 38.528621456378 46.1673159982664 50.8442982601142  
TIGD7 80.1549028765037 62.2150049214174 48.7039705048129 63.0153175111747  
74.0735632658567 87.8967913380047 87.7107079534841 59.1107691694766  
76.1869593072029 89.3011777476649 69.4877749654481 117.520762118299  
TIMD4 45.3872406432794 43.3458769998118 57.9279989359711 49.3654837541353  
37.4470183315826 46.4648868771662 39.5496902678788 39.853866204927  
39.6609238036815 39.1621898366355 39.4410515050885 37.9607839934735  
TIMELESS 123.00053659939 159.046483157634 167.966212667288  
85.5959901987745 164.462951076718 63.5738862549306 296.463473585355  
211.451463038315 305.399644617845 64.2174369755376 82.5225075943931  
117.626009607247  
TIMM10 290.710970844525 298.848001894468 69.24946602508  
416.323909993454 521.029507993615 284.296510445032 568.371815312895  
245.397708807932 3999.32180022337 335.612706052778 253.267901237295  
339.854688605186  
TIMM13 31.5599106749655 34.3715326040967 38.9790184198145  
39.5050383901884 39.2608760193011 42.357910063876 34.4570158133896  
36.3405039629059 36.9060997041453 38.4187686307607 34.4716904283753  
40.3691324547049  
TIMM17A 47.4678477186801 44.5152708955623 57.6371756925687  
45.7397504535169 43.5544347011646 48.7781962164988 37.4772922422734  
47.8947595316832 44.3440839686558 43.4885245598939 43.0016969050339  
48.4535991392809  
TIMM17B 91.2297566574871 90.3691010312535 104.832753086298  
85.7983996395757 89.4747568145717 92.2772139468085 146.42128243217  
104.822963389102 149.231260844854 99.548445157506 107.154549409927  
98.3142231283069  
TIMM22 204.659954879641 190.977045076469 222.16475904496  
117.8523906126 164.642060754649 243.489225650886 204.251854342995  
199.23413224268 160.605530211736 276.666571115104 258.446095955014  
247.676607756929  
TIMM23 465.266372824212 377.847116683974 395.457351443921  
350.451704069255 459.182372959714 340.962490240304 526.750242877914  
346.285308869994 475.881757842864 262.824698774297 261.929727465462  
371.393488010768  
TIMM44 119.853516482249 112.375316615894 120.221914344372  
109.851796671234 226.719775835218 189.80672643731 126.826715174564

124.815448107572 174.117816184497 157.121355906194 181.516519907011  
 111.267350659923  
 TIMM50 39.6609238036815 39.8695929627783 32.1218888714537  
 44.265834798964 39.6535880152834 41.9543948167375 50.0088611244948  
 41.8417024632349 32.8704945047196 38.2069499294002 40.9157352260901  
 36.8690774823319  
 TIMM8A 48.0201377454632 53.8499082625091 50.6004078448405  
 46.1673159982664 55.4919197421746 53.0290605707162 48.4859552186772  
 50.3972033014227 52.3579564953125 47.4767851750188 51.6414075056938  
 54.3587260982091  
 TIMM8B 49.6241203903354 46.9919960628953 51.4308501933893  
 56.6458456890715 64.193536444915 53.1052228246467 42.4939802311136  
 60.1796637353976 56.3441077510744 46.6598879466655 60.1466326805616  
 49.9692385479389  
 TIMM9 109.738537924214 91.5464279432216 87.7652813158198 78.7450149191851  
 94.2762661604561 135.737771384104 81.0331497830643 97.7415824971555  
 80.0733119200914 80.943990104641 88.6460475038549 118.115557136662  
 TIMP1 6356.05807792831 1752.11152588494 1670.01014610464 12770.8282719641  
 2488.32876359853 4128.92158369026 1570.45778081591 4617.45430247751  
 1529.52516575545 2966.53151444114 2640.06306087033 2934.35616793443  
 TIMP2 1111.13061382818 161.553725645675 149.916892729626 517.664764759512  
 198.497745548245 877.673009984357 76.7483302168542 255.884444464408  
 79.262977183608 579.038638774301 604.357590751951 429.983084929605  
 TIMP3 918.083610591772 128.402988047056 324.041885677148 106.398825125486  
 99.3596089438084 673.522667186915 44.9863726205428 133.981674663494  
 147.405190988088 477.263677441074 411.184636774653 345.811673759417  
 TIMP4 44.9896851005259 42.5269793679335 43.0016969050339 54.1240583139871  
 50.3713170502557 93.6236680572139 70.8835636550472 65.4714272652857  
 49.4786466722535 52.5522545249206 53.5698357689852 51.7833333848627  
 TINAG 41.7397731376692 37.8217989841918 40.4070046183108 40.3180310664156  
 40.0599807618105 37.3799542961839 36.5352572191451 46.9986083378817  
 39.6609238036815 38.0078357808393 39.2542963855807 37.4554876386402  
 TINAGL1 45.6517320730042 91.0327980861321 105.621640443267  
 50.7046706880325 100.774098314706 69.4214927857472 130.648278937122  
 83.9236799134394 146.355277438643 76.2533853403813 131.451150955309  
 156.65747550889  
 TINF2 557.979646421047 312.648013979436 346.621778258188 721.266942608349  
 258.589426470951 450.008356194664 336.159430045964 274.02972772427  
 390.266798496438 348.450810225807 320.812668695531 470.676006277762  
 TINP1 663.904584382358 842.82310025167 1387.28483887704 758.462554576949  
 786.57695312967 1578.32969650385 550.990544834571 1060.64261592822  
 807.620534408416 875.139073253298 748.913487947791 1285.49870339222  
 TIPARP 260.405228196514 427.972184856393 280.920208331594  
 514.70012608304 308.280127837858 498.284928805673 755.106456358949  
 582.511224532378 257.506228440451 587.88126282119 287.247399926139  
 915.102542160713  
 TIPIN 52.7570461169969 53.0383634135393 46.2625470410195 42.8235313007746  
 86.5513342734384 48.1591264215184 76.0041771381018 67.2714646016644  
 56.2441895183416 50.8826620053386 44.1148826235374 51.6660481331154  
 TIPRL 101.103458852775 95.7639712596394 107.348865210074 105.317399386109  
 148.477784236365 103.470005076276 93.4980947651211 68.3021016176762  
 105.492189976437 67.7626103902954 77.0003455479124 94.004826321484



|       |                  |                  |                  |                  |
|-------|------------------|------------------|------------------|------------------|
| TIRAP | 47.9796120205361 | 56.1355483199198 | 51.1701279367235 | 49.8304479381623 |
|       | 50.8239419349168 | 52.1552354356634 | 47.1345949868029 | 46.2224684821408 |
|       | 53.1793245393601 | 46.0734190108201 | 54.439394338168  | 53.840976437122  |
| TJAP1 | 513.266895252699 | 479.318513108472 | 458.47341225284  | 314.458148321064 |
|       | 601.139894733857 | 2184.70038900784 | 405.148979342648 | 286.243476131448 |
|       | 350.192608372742 | 1978.16092853485 | 1792.42490815074 | 1287.41527826233 |
| TJP1  | 237.632703283663 | 187.767803297395 | 114.224091812993 | 94.3229189690855 |
|       | 143.084029849218 | 270.253329297593 | 136.293724800658 | 159.440571032045 |
|       | 224.788507460682 | 191.361705136492 | 278.303493506139 | 301.941928552396 |
| TJP2  | 85.9749634505846 | 118.966448789057 | 97.7620313090597 | 52.6040246568056 |
|       | 79.9161139112432 | 83.5274372175811 | 121.831344781285 | 110.818741525514 |
|       | 104.840865638204 | 90.2652818919579 | 112.13936276116  | 129.336439341458 |
| TJP3  | 369.952313383216 | 282.802560118785 | 239.229093340475 | 42.1273928203021 |
|       | 240.431987635418 | 68.4323624797175 | 252.870708814507 | 267.359645500185 |
|       | 381.198152331624 | 265.320447667174 | 274.731304343034 | 184.303357812653 |
| TK1   | 370.150839052727 | 238.510952165358 | 184.048982286364 | 101.867388894697 |
|       | 298.252355588344 | 74.0995052892511 | 551.490493022416 | 255.047622225942 |
|       | 704.601607617837 | 46.7646877499666 | 50.8826620053386 | 65.0495374451854 |
| TK2   | 93.0714382925187 | 73.6036945547683 | 96.0654949568324 | 104.335120306753 |
|       | 58.7460488758053 | 85.2805684630976 | 70.2635892414678 | 91.6777754418002 |
|       | 70.2541961995753 | 93.7782490229256 | 76.2226219333049 | 88.8330881965986 |
| TKT   | 848.079114196986 | 1243.32650314893 | 1466.88103496067 | 1375.14388134842 |
|       | 2237.08790397818 | 1144.34555072807 | 2257.78227736778 | 926.61614755153  |
|       | 2865.25344854768 | 1440.41726370246 | 1537.76265834076 | 1726.90584784425 |
| TKTL1 | 45.6517320730042 | 37.3634897565502 | 40.1985790927248 | 45.4634652319753 |
|       | 40.2449343247539 | 38.8336427948187 | 36.197424053556  | 38.8495095797881 |
|       | 37.10170285405   | 46.6598879466655 | 41.1638563416981 | 32.2133093774284 |
| TKTL2 | 37.4554876386402 | 37.920964499903  | 36.4564050256915 | 39.853175885492  |
|       | 36.6354013629791 | 37.0180934800573 | 39.2533668167483 | 33.6816578730693 |
|       | 38.6322728994674 | 45.3530683538086 | 39.9070785037411 | 39.8497227447888 |
| TLCD1 | 116.253417059012 | 85.3754356809649 | 101.020328028769 | 51.7739270955254 |
|       | 97.7153995525346 | 44.9896851005259 | 163.011116329807 | 177.261319004133 |
|       | 150.925721934159 | 84.6563174894574 | 72.842552380479  | 71.381069076765  |
| TLE1  | 88.3799086910448 | 61.5429260998857 | 73.6323065529916 | 50.8567345921473 |
|       | 53.9074374788981 | 72.9154861179393 | 82.1144251872199 | 66.4207938873541 |
|       | 52.2631308081333 | 86.500678864429  | 83.0072253231162 | 109.14984236229  |
| TLE2  | 130.600539398332 | 169.838827072973 | 416.972264086884 | 92.999328769924  |
|       | 182.757684959879 | 382.190644764853 | 455.774407260725 | 348.65230953701  |
|       | 251.905799624693 | 460.162024551004 | 355.821515437298 | 292.47671022688  |
| TLE3  | 96.6833301748676 | 71.7215348945466 | 80.943990104641  | 223.168185178205 |
|       | 106.951862149262 | 73.5743059777365 | 132.541333041312 | 135.997802304719 |
|       | 84.9075858560758 | 63.7836577144372 | 66.9494774452406 | 59.987045425047  |
| TLE4  | 71.4937262725923 | 120.73773749436  | 100.057155418659 | 161.366023036685 |
|       | 74.0735632658567 | 136.04447103201  | 88.5140510969737 | 120.850874262069 |
|       | 69.3300058073438 | 155.942366087388 | 213.028412890553 | 135.454168096854 |
| TLE6  | 42.2455707947223 | 35.6434124419782 | 80.257554904218  | 40.9607305725196 |
|       | 42.1650127805175 | 48.0350549043063 | 44.4639405506967 | 84.2434917159728 |
|       | 74.3394153125605 | 44.1379638573455 | 47.5439485437351 | 44.8372404608604 |
| TLK1  | 87.8746766762445 | 72.3297091475814 | 75.4317740345967 | 113.388372364837 |
|       | 86.8871118411414 | 98.9560329133205 | 81.2136969156029 | 107.094663242259 |
|       | 87.275548276476  | 132.710335836559 | 107.28550551509  | 104.860298453006 |
| TLK2  | 135.567012693522 | 153.940127525369 | 107.971806573919 | 118.762101740563 |
|       | 145.572606290643 | 142.444971930298 | 153.019365845424 | 99.8277095030346 |
|       | 154.752920877816 | 102.880267177687 | 154.355197155161 | 139.472956453414 |

|       |                  |                  |                  |                  |
|-------|------------------|------------------|------------------|------------------|
| TLL1  | 34.6977013306396 | 39.0894172982439 | 37.5597671487621 | 37.9875302985336 |
|       | 34.2638875325204 | 39.0266821712099 | 35.1307934330047 | 39.9576138799997 |
|       | 36.5393857306744 | 37.2089297656361 | 33.5370783156523 | 38.4330755397458 |
| TLL2  | 38.8561375693335 | 41.4223563635976 | 40.6737160001291 | 39.2780515621926 |
|       | 41.2424637338424 | 41.5132248356707 | 44.4045701012801 | 40.6171774724171 |
|       | 39.1790517315259 | 43.1839109702714 | 41.7651272076914 | 40.9149601380325 |
| TLN1  | 165.974848305379 | 143.822560762049 | 130.925724760241 | 291.486402879057 |
|       | 131.045615546105 | 487.065758294354 | 169.970634268117 | 158.998384690038 |
|       | 122.504770242427 | 310.821299796803 | 323.002018912848 | 375.529704925121 |
| TLN2  | 78.1313732870053 | 60.1685144469519 | 60.8942621888353 | 49.1786207920603 |
|       | 68.9038222450855 | 110.869341159607 | 75.287377665837  | 90.6347108049639 |
|       | 77.5480089703916 | 128.616776019243 | 110.729504563799 | 83.6255924297514 |
| TLR1  | 40.8681871019812 | 45.4882438975269 | 35.2101597814352 | 100.001150612051 |
|       | 39.2608760193011 | 42.4580504587581 | 43.6753843488695 | 40.6171774724171 |
|       | 45.8325181856483 | 44.3648993568405 | 42.5426057453993 | 36.3454320848591 |
| TLR10 | 42.0778399888414 | 46.4861258030402 | 42.9104454767916 | 68.8167148906225 |
|       | 41.6806984441849 | 43.7218212419823 | 42.551356054931  | 48.2186010376187 |
|       | 40.7423597075638 | 40.8049408996274 | 44.553780984244  | 41.6972107715212 |
| TLR2  | 41.3387790895716 | 38.8336427948187 | 43.0016969050339 | 142.545268664218 |
|       | 37.5556299264699 | 43.2805590023412 | 39.7576136507593 | 40.3357777530419 |
|       | 43.5669306063196 | 42.2614524730856 | 36.0481934423077 | 42.57175366709   |
| TLR3  | 47.7779356299965 | 48.1829653238565 | 56.4779645313958 | 45.1944222548351 |
|       | 44.9936360641969 | 52.3187919317561 | 50.1185085888209 | 46.9454141780379 |
|       | 60.3351200884626 | 46.441301934328  | 43.9802831041664 | 53.5966673719267 |
| TLR4  | 52.9240098541574 | 72.7987593815919 | 60.6567691532561 | 367.451332073134 |
|       | 52.4370718282084 | 84.9099930524863 | 66.9239565096247 | 49.2901038327894 |
|       | 45.5779686360641 | 57.0581769379589 | 56.5402453093703 | 81.6458112867541 |
| TLR5  | 60.6441065119394 | 53.9275079525238 | 117.355761277966 | 197.540681021755 |
|       | 48.7288537840562 | 107.440379066528 | 57.6643188499117 | 103.945335792682 |
|       | 63.1944558106132 | 176.861690566909 | 219.431561967403 | 127.239392811099 |
| TLR6  | 53.2046867327331 | 52.5868047927666 | 49.501977696496  | 228.615793354146 |
|       | 46.8674366115656 | 70.9514994373481 | 55.1240750633045 | 45.7003272484265 |
|       | 44.2142581488029 | 42.1317134987795 | 45.0017158586743 | 44.5432192783161 |
| TLR7  | 56.1912096308988 | 54.7855575216687 | 52.7005092555102 | 112.368910939752 |
|       | 46.5557478175976 | 80.5478617156852 | 55.695361644141  | 68.580705761277  |
|       | 39.3750969348308 | 57.5713378330876 | 40.1742127891824 | 48.8670821164567 |
| TLR8  | 47.6938628797168 | 48.2220547806679 | 48.8100349749783 | 227.059460958349 |
|       | 43.2988017098387 | 57.7125861123012 | 56.1336444195175 | 39.9955307208157 |
|       | 42.1594905198929 | 39.7835513496873 | 39.6719190054379 | 41.2870505273664 |
| TLR9  | 46.0023068797812 | 44.1239711172417 | 44.2405728317107 | 49.3654837541353 |
|       | 43.1252272136667 | 39.7394181011603 | 45.6042625176633 | 37.33030683349   |
|       | 44.2607789091176 | 42.9866214102525 | 42.357910063876  | 47.5025821041537 |
| TLX1  | 38.7537364570873 | 50.6229884142872 | 41.785676764591  | 38.8495095797881 |
|       | 43.844855336215  | 42.8598805316863 | 58.8993834673475 | 39.853866204927  |
|       | 40.4997186069494 | 36.4651112441576 | 35.2339574411711 | 39.2469742642337 |
| TLX2  | 40.5235471987417 | 40.5400384479766 | 37.6557714476853 | 38.745552403895  |
|       | 41.1868052124344 | 41.1090481599939 | 41.0381860307445 | 42.4926864381766 |
|       | 41.2424637338424 | 40.3458948319669 | 39.8184668132023 | 40.716553247236  |
| TLX3  | 36.1232327599945 | 36.9994058279362 | 41.6079958749402 | 34.5425384901279 |
|       | 32.0568298766078 | 35.8227939208521 | 38.4005795891396 | 38.8495095797881 |
|       | 37.1820543575123 | 38.1042454705119 | 41.4508241771315 | 43.5738557773903 |
| TM2D1 | 261.653821192385 | 289.05213385509  | 325.083760277008 | 189.035121001539 |
|       | 274.731304343034 | 226.057278804077 | 168.482495410546 | 132.663052961193 |
|       | 393.648308810931 | 206.768099707991 | 187.315844580254 | 247.193935816149 |

TM2D2 107.466490458133 80.6083247572711 84.8948024208923 110.88526946931  
79.5175547131776 107.808744445896 60.9648845690177 70.2541961995753  
94.3537052300317 90.9570747667407 108.12482131423 101.804757613639  
TM2D3 192.861174667738 177.878878992191 141.48637125542 182.31306890697  
232.847812981531 178.904972763325 205.854666205308 117.305340546242  
211.485592971588 185.677720870442 202.872083191114 232.113067048781  
TM4SF1 1245.45371155527 418.693470287372 1370.76188322111  
875.463242737778 784.951880532127 1055.69506483576 708.005870621064  
2101.59244895554 2280.42953098693 370.495645380436 573.613497159192  
487.749060801066  
TM4SF18 75.6471706262645 88.6368226476614 121.552188287725  
112.805898501551 71.5345397102823 74.2690269784394 42.7431359850339  
60.9801094225351 45.7452456977857 58.5831897269778 70.9638091288679  
70.7760293129408  
TM4SF19 48.0570064280814 41.5191828467556 40.0606435950001  
82.1323695817857 39.5068753428772 42.4301183791899 41.0381860307445  
41.9704647265931 39.8757374899721 41.2700204291848 39.7342718293432  
42.3288275690551  
TM4SF20 39.8662795144616 36.6968906669565 35.8265993915844  
38.9534635879195 39.4693871570028 46.1513019317765 31.197411437683  
39.5466975353131 37.1820543575123 35.2880714952489 33.7948557837079  
33.939263369489  
TM4SF4 43.2724556187214 52.2501726671381 44.4311655729487  
37.4223289687135 39.5595233162192 36.0306975524309 43.3262148375525  
38.4540849632254 45.3756389170606 43.9450023643394 39.3667161654772  
40.7704587752083  
TM4SF5 42.0532901689036 38.9338521051669 42.5406888281114  
39.853175885492 38.3561682218911 37.1317006162938 40.0052661202207  
34.5886782974123 32.554751989205 34.5718473203083 35.6970528713709  
36.7762265039864  
TM6SF1 59.8248482438562 67.3519071522322 65.9476039189301  
183.028254350275 45.3675390992851 65.2014839770255 63.0119737420787  
53.7378346199838 40.0403898620771 43.4885245598939 45.4799270968969  
45.7562276914441  
TM6SF2 48.6621527194963 39.9339434067497 40.6216891610774  
40.6907735219854 43.5808453440435 39.2679765937101 40.9647597231175  
42.357910063876 40.0403898620771 40.8970401536578 42.4580504587581  
41.0657892043496  
TM7SF2 138.26207427245 350.796638646601 275.407306413402  
92.6230008876347 1249.41227924272 174.392758289374 628.403814060213  
669.419736252343 387.867128019374 247.04098109003 221.972553229362  
105.382126899524  
TM7SF3 49.9419897484381 76.3583555666815 104.351256270039  
67.7121534934164 86.2836002982515 78.9521593412581 88.3335649692467  
50.3972033014227 62.370559099758 67.2437599548936 96.7799695976296  
110.13638939902  
TM7SF4 46.9939712192224 39.6995529770239 41.1367478979484  
80.8728961146267 44.3557408297309 41.8613406887824 49.8281348927244  
47.5950227477807 40.5912213523345 47.0055981216687 38.6662194645633  
38.5279745308203  
TM9SF1 152.250444470971 113.791456064084 132.604567913122  
109.398472684587 101.58345410371 85.7013212907541 98.4699679900651  
79.3614922672599 112.707612911654 91.3112603277315 91.5258329186709  
107.101455915625

TM9SF2 593.801086643125 753.976423227915 765.145138238955  
 721.887210480162 402.978328664331 368.793978305607 492.324859107777  
 467.351570171652 659.666977039793 485.310097523194 550.371519625344  
 708.839262759372  
 TM9SF3 153.384919558071 103.961956810572 99.2504397421242  
 115.468303687641 83.5069968129733 95.6783002876222 95.2218627805387  
 205.806939441015 117.678385591938 155.633918471987 180.15711251649  
 171.899182876869  
 TM9SF4 265.570814613305 372.758184542037 411.431488342465  
 217.721787448311 549.407911286514 262.277293680018 280.075938355178  
 273.320144423733 402.571146447946 321.550107822925 352.019218177371  
 354.634819362978  
 TMBIM1 202.230726475934 248.321641540666 310.188313944313  
 212.99813190918 145.439350995461 198.54718783437 164.580141651883  
 256.165801611585 372.421330252979 407.564154455615 276.939964364659  
 302.143385957116  
 TMBIM4 1182.10714525377 1564.55598228713 1981.03929621057  
 1848.50311456636 962.079396754147 1261.91478863258 1317.29255644089  
 851.108027634251 1307.19925493293 1103.90449800536 1333.01876209753  
 1658.86829668934  
 TMBIM6 3021.24285327836 4986.44888767011 4036.89580181979  
 2911.10227993347 2272.91548405176 2126.41018877615 4235.59743465057  
 5776.17749026501 7785.77078492993 5156.59948231705 5297.71706629059  
 4381.51418239047  
 TMC1 39.6609238036815 42.7775752471711 38.7745734037492 44.265834798964  
 48.1473938886239 40.040778349137 48.0283573444179 40.6171774724171  
 38.5252456306656 41.4397539024976 43.0971787292711 46.1592873342534  
 TMC2 42.2455707947223 43.8495248991589 42.5406888281114 38.2041059863839  
 34.6227169056411 37.7000400506818 45.6042625176633 39.7509165247419  
 38.7298222155532 44.2580151149956 41.9908237694988 44.8372404608604  
 TMC3 42.0532901689036 42.4493032770053 41.0356368374708 43.074472921841  
 38.9496515344837 38.2293008890613 40.7910160811527 39.853866204927  
 49.1940901905636 43.1839109702714 40.9157352260901 41.5536168238478  
 TMC4 88.5140510969737 308.336693903042 328.63511311303 38.3166554965434  
 173.977605406146 52.1024135605001 121.195506364658 85.1544284060549  
 180.844663304872 179.994715581707 187.422036538629 205.650076927315  
 TMC5 45.1912496459517 38.3322849790657 44.3344900481112 33.6816578730693  
 42.0709558258414 33.1602385985469 37.9430145836712 38.6454098044474  
 38.3418933808844 39.7835513496873 41.6336636285875 43.9541718254769  
 TMC6 366.915943380617 410.257694738546 226.129944267737 295.848968688724  
 271.744096146509 121.969082013079 331.390452289344 500.794458547464  
 377.221676837377 175.771191968095 143.84904170479 130.048910817957  
 TMC7 49.9419897484381 127.232160404726 254.792341536652 51.5913529948887  
 55.6069214673486 48.8744644207821 67.0455170947389 60.419911425109  
 93.8042295944812 88.0664425843955 104.241389167544 124.903031106573  
 TMC8 41.6354649482853 44.9370339275041 44.0451487108213 50.378948785456  
 40.148780650831 43.3785777889265 47.7390230243778 40.5158867964016  
 59.1223319112238 38.528621456378 41.2598458726002 37.8490162439785  
 TMCC1 46.3390850717989 39.6123051184545 44.7829632472754 39.9084621723809  
 46.1513019317765 46.3203995372658 45.1694246393676 42.0847226073592  
 45.0666179335087 44.6918600441328 47.1477056711335 48.7226309877005  
 TMCC2 41.2424637338424 41.3610369241157 41.6977706798234 38.4208429103799  
 39.2608760193011 42.750861693377 41.9393838138203 38.956280281655  
 38.3418933808844 49.9493230064613 47.8988096575648 40.4639532172338

TMCC3 35.0202257459026 39.7835513496873 34.0382693188794 44.4367387274922  
38.745552403895 38.3418933808844 42.1607322031054 38.079222289614  
38.7298222155532 32.7876527533679 43.0971787292711 37.4554876386402  
TMCO1 792.45141054331 949.278493776928 1110.39060103557 802.650020720921  
1487.80306986156 649.487838020327 927.114648870177 624.51670158046  
1266.41536472956 628.84789420227 784.951880532127 895.735191953679  
TMCO2 37.7384958256497 33.939263369489 42.0621425894624 40.4359177791566  
40.9950639693255 38.5252456306656 36.5352572191451 37.2237132058632  
35.1155486926999 31.5892202809227 39.9070785037411 36.1647506311964  
TMCO3 161.7095047889 161.65846687852 210.133037772969 241.08817915181  
104.351256270039 206.450109223116 106.317388820963 91.1834104205004  
102.063594231253 129.613152757362 129.434864701718 142.812241748319  
TMCO4 59.3923286524971 64.643220133046 56.0477607422828 55.4180794172794  
60.2886873195135 46.8954576545929 45.8980298854198 71.9000032422349  
54.113533179847 73.4447529556358 58.2315917325629 61.1022920882065  
TMCO5A 39.3709357615493 36.3110701990588 39.2707964550441  
38.0958223740111 34.3633615460307 34.3887641786747 36.8369172900902  
37.1317006162938 35.9645119596869 35.8304004211528 37.8372168909583  
34.4570158133896  
TMCO6 54.3554233228353 65.084620579901 73.6323065529916 64.5347406608537  
79.1822591641672 50.7516773099639 62.3556396662215 54.720204938924  
69.8899273527731 76.4439037944547 65.342842101283 59.8760452220989  
TMED1 168.20241447621 122.495387796233 106.243765443714 131.955454394903  
199.858233616116 119.14126712577 147.471179343348 112.805898501551  
171.485221601137 133.893108529325 149.5664106654 106.20479137406  
TMED10 253.841638589385 350.917244438732 701.935442033195  
269.582598918998 309.022069786139 461.720988147862 218.446312290024  
132.52749757795 599.670771796585 197.13726107504 328.387270297393  
461.123856163975  
TMED10P 934.48498309932 613.27814206548 1232.7632290973  
1194.67103388675 949.923102632043 640.596557352885 646.323419285676  
671.959673037066 1876.51621222292 480.260282672252 818.927157206447  
832.181997440212  
TMED2 327.455030020799 447.348799009312 414.062259640915 367.808375988242  
307.419724291399 368.318359434313 255.521720396044 211.868223638158  
528.242677613584 195.968119243879 255.598083334598 424.182335137838  
TMED3 2331.12401106076 2598.78910128081 1043.26325848938 1096.1705171588  
3244.27810937143 891.080174768895 1436.67510926345 3361.67247904403  
2712.36664370642 1858.94179312821 1945.33618761041 1516.33074288338  
TMED4 323.002018912848 422.237766234202 375.757961593064 273.645674189546  
329.120125961774 237.443715611786 300.186402341399 263.330471155421  
380.4099232546 137.294289316915 204.200566808626 240.02527500313  
TMED5 276.267583952979 458.66739585187 434.682456437647 552.480471244789  
392.122735729786 333.122044191102 537.841677481011 463.022816882856  
300.703401968169 199.035083736742 192.216758313982 409.312313055794  
TMED6 36.6480005877129 45.2556760873335 43.0016969050339 38.9534635879195  
41.9842695818285 38.3418933808844 38.1793598983615 42.357910063876  
43.3744503319109 43.4885245598939 40.723990462047 40.3691324547049  
TMED7 170.150808455621 191.6998930948 156.294411442126 206.547106685191  
182.273794635176 212.219384864571 130.812376632261 117.612004923867  
192.632227878708 178.422506138888 181.793140865972 216.247225354243  
TMED8 40.0557788909923 36.89524015739 43.5710871617107 42.6913548400127  
36.7356360093603 38.9378717994178 39.7576136507593 36.3405039629059  
43.9450023643394 44.1379638573455 43.5710871617107 42.9887069977696

TMED9 1269.36837611919 669.776067547468 1478.26733379357 1123.99110499679  
1232.7632290973 608.886783362316 583.915973546284 728.679189702033  
1347.15664445545 874.419252731128 993.626865290891 869.879392791086  
TMEFF1 49.9419897484381 46.8954576545929 45.4865173433646  
43.6726153508978 41.1868052124344 41.554942319225 51.5967098638347  
45.642304356051 46.4164127487052 52.7972156492746 46.0095710163378  
45.6692241948108  
TMEFF2 37.0320432433314 40.2493681589104 37.7384958256497  
37.1894304543751 35.0181575202066 80.287662312208 35.8227939208521  
43.9366081640576 35.4332080966594 47.611018474151 39.2542963855807  
36.064718696392  
TMEM1 49.965271003193 51.485516160404 52.9776432009209 68.087403590986  
54.1892600262225 54.8609068340124 54.106779254225 51.6660481331154  
50.1912176441302 47.3791873993182 52.3034212084073 48.0163377492228  
TMEM100 45.1912496459517 40.6380495994768 36.6522278218553  
46.1673159982664 53.6907197364586 204.862161704394 46.0228732507872  
51.3472428383325 42.5406888281114 57.8585041080995 57.7786197537899  
100.824660338235  
TMEM101 360.962191673108 270.756849919679 433.194113859912  
248.599530435666 405.496884468464 284.296510445032 249.002758392739  
185.312851727212 358.498678171092 556.092573451208 426.015657750123  
388.74199767336  
TMEM102 41.0608773166058 46.0713306971594 40.4882741869718  
40.5484717678957 44.6834648302383 42.4580504587581 38.2933870238743  
42.7431359850339 44.1519466943185 38.957687788868 44.3763859390287  
40.2669497398702  
TMEM103 90.500550952567 109.758297200083 110.649342465555  
102.526214617084 142.066425511614 101.177486898065 167.653939596625  
98.0967511777819 147.719172115976 151.815294281745 144.046404221564  
110.379403044901  
TMEM104 57.2960245538881 51.524711857679 48.2883694323339  
63.9570596163747 69.6330393135101 52.6226745117396 61.5000955267432  
52.1788489555942 56.1172088979505 41.1222709786153 52.4393177875001  
48.5123041297835  
TMEM105 66.5500089527674 45.2556760873335 44.4311655729487  
42.1273928203021 44.3557408297309 42.9695585740813 43.6753843488695  
61.8665316900291 39.853866204927 56.9463858443402 49.532546810992  
54.1941919612524  
TMEM106B 96.1710806345503 91.9238405195899 84.5055910320032  
64.898351831341 77.3367966395554 114.526825145076 58.2957814921605  
56.5280894868341 86.1303605978972 92.4534854832186 94.9785931907153  
108.855682928578  
TMEM106C 179.994715581707 104.072423445726 148.906660152784  
75.7666827480067 119.088986733238 151.641746442323 193.60925192949  
357.762505796238 255.087214364926 158.195749606017 117.586275152761  
165.640362974584  
TMEM107 55.7246872330059 57.6459037974353 67.8452645288969  
335.655540947167 62.3862792065884 85.9636350040248 61.7572675712557  
55.4919197421746 50.199100055985 99.0596863442346 54.4140381300469  
49.5197902747103  
TMEM108 45.9090659324223 52.8264142735929 44.7829632472754  
52.1201052574162 70.8749669449099 102.980622026276 42.357910063876  
44.797320243931 77.1317865202676 57.3562426592112 69.2787430208317  
63.7744603935682

TMEM109 454.551748488397 520.415257194417 419.054753590648  
469.78210773245 469.553640187203 653.089523541803 518.300755011657  
463.527266972118 344.887504955742 565.411298018845 533.820505121067  
406.33528162722

TMEM11 120.129857395808 84.1922656126304 78.3378279021752  
71.1583251698218 77.9085946827079 83.3664149246525 137.081911344143  
73.746472097049 115.441414762268 78.5141640924736 81.5678694264684  
92.8006484232438

TMEM110 45.3872406432794 52.0268699306396 56.2441895183416  
65.3191216270241 67.9032387662129 58.5530199658661 43.8206425661746  
50.7364620410977 49.9162522057712 48.4890615340603 56.5402453093703  
55.4635297192076

TMEM115 206.261432452217 227.686495419561 242.080992016235  
233.294970051779 230.169916252549 205.876395674271 275.222714101589  
209.178131628825 241.384699095468 333.566613571224 305.048508698231  
186.67069792963

TMEM116 115.277469628296 95.5627648703794 87.6178717341967  
75.9099205260748 75.2391243965793 87.8967913380047 78.9900928241723  
69.1973371867031 97.8009303343756 118.93749473833 115.735359157053  
205.413872130332

TMEM117 47.8249696958403 61.7572675712557 65.49167373382  
39.5050383901884 67.222434502867 55.7197525213035 59.5205055437765  
151.135296427249 92.9388175558241 76.826527950236 71.9658486648999  
87.4273245333478

TMEM118 83.374777060444 68.6804583979297 59.2012779686869  
50.5310598656998 187.580695643466 46.4648868771662 127.043177339038  
116.103491885674 107.538934056558 55.7930787690756 53.1505787220552  
53.1182952086284

TMEM119 784.268074988084 259.220844287491 80.6032289311256  
407.949645788215 94.5055588176321 295.5163490537 45.7452456977857  
406.500583302121 70.3613168347492 360.248832535446 435.094968715663  
149.812291220906

TMEM120A 129.938114164087 84.9182861692273 97.5849495690144  
151.99110418225 103.792424865682 119.14126712577 82.9431583622036  
121.270627995568 99.8277095030346 139.999709303614 152.555556133364  
124.559758809231

TMEM120B 43.7585538437696 50.8460732110055 46.1312573416873  
43.1275490164761 46.807320159421 40.1428591998404 40.7910160811527  
38.079222289614 47.9035532886869 43.3465699185405 37.9230440150891  
41.5132248356707

TMEM121 48.7646976789783 40.9731067463382 45.310660704531  
40.1804147506786 41.8806343997257 40.5281496800812 44.6032218589199  
49.2901038327894 39.4762546236449 39.7835513496873 40.2649309204478  
40.0557788909923

TMEM123 814.294297312057 1012.0373748933 1065.70206468134  
637.565156571985 648.885062676884 501.319993127353 886.397061577531  
518.936896882424 1393.24135330226 478.566247444176 674.674666457804  
1151.25293766167

TMEM125 402.886581458688 82.5344501505114 52.3432130135266  
38.8495095797881 76.3790849853724 47.0027453663546 159.835690229505  
216.911833562615 91.6978282652998 70.7805103907761 61.3149617644002  
68.1513215633609

TMEM126A 244.089971761037 291.785618741057 295.856741468603  
352.292837622545 286.68367978144 399.80505620721 335.736886256621

290.448089141121 301.594300620246 189.035121001539 197.325473090277  
385.827237353675  
TMEM126B 338.164006403 210.200786815048 222.81957100654  
314.091389958069 287.30565836295 406.964801954621 265.414737742846  
214.245832611737 203.651890041185 218.273094883881 203.788504042093  
313.660064080622  
TMEM127 70.2541961995753 76.093116738739 73.845912534353  
104.8505815954 65.3019328668633 66.1082848714279 62.3556396662215  
79.8264217848103 73.6965494979349 104.288073521816 92.8089247593564  
70.9377012403023  
TMEM128 42.5193208629123 48.0010635382918 43.2721716572958  
42.4061338151892 40.5235471987417 40.8634043028528 44.5390641547628  
43.0930293831497 41.1742244762318 47.4767851750188 47.7902961065936  
50.5511827666954  
TMEM129 31.3422392302759 53.2046867327331 47.4740726032707  
38.8495095797881 59.1948983423381 46.263826584899 39.8695929627783  
43.1567024035183 56.6079099547057 55.4037482627222 50.8826620053386  
49.2064066614865  
TMEM130 43.1805016690297 45.4143854024453 47.9035532886869  
48.665578118898 41.3755760434934 49.1013967533186 43.8206425661746  
39.9576138799997 51.2776048338 44.3648993568405 39.153226699662  
43.6753843488695  
TMEM131 288.642294976 380.098235864256 541.105845300009  
417.738831997557 388.920739791844 334.90764380842 261.6201598868  
249.584588371496 373.172504097546 255.365088438518 365.401746744015  
395.875593488613  
TMEM132A 201.574654530622 92.8951148347802 103.189199090363  
85.5959901987745 226.553946570328 46.6872654833579 132.903804194161  
136.081259669601 85.1920126487447 38.0078357808393 46.5650556481721  
43.8575940017119  
TMEM132C 39.7576136507593 42.2577689927563 42.1901757067073  
37.9875302985336 40.7779767565889 44.8872784170036 43.6025443656008  
40.7799172560245 37.7805366040928 38.2069499294002 42.3413611855132  
39.4830039788612  
TMEM132D 33.9561816279577 38.4330755397458 45.1569741609597  
46.4555908533915 47.0954207417646 39.7394181011603 41.8315602975157  
36.5393857306744 40.8970401536578 38.6454098044474 40.6373400186325  
43.3744503319109  
TMEM132E 39.7576136507593 38.0226905622357 40.4882741869718  
36.3604951341921 36.3390947880186 37.9003288112261 44.9863726205428  
40.5158867964016 42.4540072551568 43.6033221838149 41.7272875295469  
37.0953622406687  
TMEM133 36.4564050256915 44.7829632472754 37.1643693306382  
34.2080003860523 35.6434124419782 38.5252456306656 36.197424053556  
35.5798430594271 32.9756367838345 42.9866214102525 36.0481934423077  
34.6720534245631  
TMEM134 264.407051461506 673.522667186915 583.690350347288  
187.439021508049 267.565744773928 200.082941320005 536.290060852815  
602.726022292973 568.905368101326 506.585006700107 572.19538884395  
351.883708151967  
TMEM135 82.4263339218052 87.4623442823265 95.913238814854  
73.8480604979804 94.1575209300592 75.8976034525022 86.4898752526885  
110.287699369482 108.098254669378 89.4747568145717 84.5267954034597  
73.0333258448698



TMEM136 109.251112569215 55.3477556906605 50.2869791217819  
74.6159297822533 69.6330393135101 127.49459343016 76.1869593072029  
165.640362974584 60.6266092582071 77.9085946827079 77.1900613562529  
83.0460206754856

TMEM137 89.2913927776683 78.9900928241723 69.0503036666628  
68.8167148906225 65.9413235523618 78.6402083787251 80.5457814044192  
116.74427460886 60.3351200884626 66.3956936248447 108.022329297132  
158.449570606242

TMEM138 155.633918471987 140.853812988562 167.966212667288  
202.983984966874 315.186937216422 118.638732417836 179.07886477603  
176.492987902471 168.036319777283 198.979794834746 157.7623351008  
195.482216656634

TMEM139 110.729504563799 45.0905928998779 47.4740726032707  
35.6928955245309 45.5809132232681 39.7394181011603 59.6780848951767  
74.8893925448138 49.3780606970538 68.534940191185 88.0877175295544  
67.0331844416938

TMEM140 187.16833117416 129.722486794942 106.058751335133  
661.718946652592 75.8306078651291 208.023488988931 103.118579484715  
92.227126770051 95.9999165639785 156.259762538052 189.47090669378  
118.762101740563

TMEM141 228.571334092678 202.230726475934 151.344720108793  
102.00080367858 113.18951586976 87.7460859694899 113.692418102755  
158.195749606017 142.647217549267 244.678323059428 192.470747766298  
132.508880040274

TMEM143 53.7507429765038 60.0601788842942 97.8309399470621  
57.6511495792664 76.5375674421131 71.9329028989527 54.8074655158941  
63.3768687067745 65.564930068976 84.5913809068614 68.4659783447092  
64.0541263553251

TMEM144 80.8285585008048 87.4273245333478 83.0959169307948  
92.084526929319 63.3638417360105 48.6621527194963 62.0404348860702  
85.4437963805637 71.7215348945466 101.351907645804 90.2624299533482  
96.0539709962851

TMEM145 52.502055890816 62.0908175930716 52.3432130135266  
46.7577982595088 63.686652234709 47.2009420656854 76.1869593072029  
54.9919060580109 53.3932110698117 44.1379638573455 49.1868644496737  
41.7575097298927

TMEM147 1149.90692951795 1829.30985071028 923.470702344816  
901.793120584383 2448.64580552439 1176.37732422904 2844.5506310828  
1656.16581692717 2237.08790397818 637.035929429013 926.61614755153  
850.205634919459

TMEM148 39.0620487644635 34.8137085420423 39.8299340037009  
44.1483976313959 32.9756367838345 40.9506062495231 37.9430145836712  
41.1575777497576 41.4636047919453 40.4136535208406 35.860430241131  
39.5418280570561

TMEM149 133.823107212467 152.187430924861 118.358996104366  
410.402285012885 160.203825526096 123.387418707738 198.360449141425  
125.484233748017 87.036020750455 76.3583555666815 54.8532558909227  
62.9904770954043

TMEM14A 166.281651016457 277.014526407597 576.140066807763  
117.539037885384 188.670053901101 179.433109488671 186.620669365322  
190.77754486426 258.120500906788 120.837993273922 147.321968565095  
226.235985918654

TMEM14B 394.60094965726 262.277293680018 244.089971761037  
314.609371608151 554.551745559065 443.581460031166 324.658458599373

635.906934423716 463.84209540456 218.999184133546 262.215263489321  
367.158502379417  
TMMEM14C 1428.47642890543 684.238999553691 824.946988188872  
761.922486104216 1343.66876893729 1219.52011418558 522.377154567257  
993.626865290891 1005.45493369789 875.787532301293 731.670315613547  
1115.27580736237  
TMMEM150 177.173301602325 183.854020356927 266.717224821545  
186.866378606003 216.63059645927 241.901039109114 136.751431410199  
193.981651711507 168.036319777283 220.03226547675 239.117228656704  
193.875712862166  
TMMEM151 31.2812535042976 38.0226905622357 32.771863438151  
40.1804147506786 36.4434672195785 32.0500360504817 50.3519150282938  
38.3684202018524 33.3643994200057 44.4652605017595 27.4352294118391  
39.6352613956998  
TMMEM151A 40.3478825593224 43.1805016690297 41.2747736315207  
41.9635525160083 39.9697332660833 40.3357777530419 43.6753843488695  
42.8899872337087 44.4812539947185 43.449858008666 41.3122147844752  
44.0977148249302  
TMMEM154 48.5835484742456 235.101442092497 153.827399203384  
241.736113354506 109.649431670339 73.0247140074919 152.649165330093  
93.6464901357407 136.541379502691 192.763875975315 202.459251553516  
237.864776225441  
TMMEM155 45.4799270968969 45.1694246393676 41.6977706798234  
42.0102671859606 44.147557390293 45.4882438975269 48.6395795163502  
43.5544347011646 40.8970401536578 45.5776159432079 43.7585538437696  
45.2783024981315  
TMMEM156 51.0225132036905 54.1773909134233 51.3268475761593  
98.0967511777819 46.4343327861696 39.8455060654531 48.6395795163502  
61.62834757456 48.6171311968573 60.2877434874622 62.8050945727712  
57.1021912253879  
TMMEM158 3634.98300564068 448.508714709248 182.219366179899  
1110.39060103557 905.76958446454 217.39432336811 113.039124313172  
1224.80240464583 139.905295316081 252.487015579489 383.578947165143  
306.820897953626  
TMMEM159 93.146085697072 138.783011990219 171.176393131741  
67.1209520838357 79.7808217577226 146.299417934358 101.832945816193  
130.72385089567 109.594402843796 138.292681458047 125.752132815786  
195.221917652149  
TMMEM160 691.132727131746 397.520960156896 476.421959423835  
350.584135047249 567.827069916244 373.46798029115 509.879213331349  
327.729165976539 887.118866402149 355.821515437298 381.871660734831  
270.303708972854  
TMMEM161A 57.4376528157926 60.4646208319121 65.5820437889838  
45.0798408927912 122.824055084598 57.3797835448761 60.3928833351886  
60.419911425109 70.7238101239421 64.428683021978 57.2008272301399  
61.7502624458447  
TMMEM161B 38.8561375693335 32.9795880920156 38.4043916290561  
38.8495095797881 35.0181575202066 37.0180934800573 40.2154497375715  
34.8949555140527 43.7630587657205 39.0648733099061 47.7535797917441  
44.9070250604284  
TMMEM162 40.9558083259517 37.10170285405 38.3166554965434  
46.4555908533915 40.6723334103791 42.4580504587581 38.1793598983615  
38.8495095797881 46.1101825640108 39.2623423164488 38.4689132737495  
42.2577689927563

TMEM163 64.9367707455078 150.957220787781 105.052418151358  
111.347228208501 83.764882413379 47.4699236780425 132.541333041312  
82.7269382676336 56.9320717885002 60.7495043977707 58.133863696399  
65.524821699432

TMEM164 40.7609952437622 47.2770121962655 45.310660704531  
40.0698728584484 35.3327761997046 44.0804700754786 46.5650556481721  
45.7476095696859 38.9834959368496 41.7405682794166 41.2598458726002  
36.7762265039864

TMEM165 55.4004611309636 84.1224653052549 80.1665291227124  
86.6411972262415 95.9075629352341 74.7669841575348 64.7023558190673  
75.0377156190383 94.5186910848217 52.8928296360463 53.9517841438975  
84.5998418020787

TMEM166 91.5417574979683 48.8584917918986 37.2838080935695  
92.8026641003757 38.9496515344837 35.9305494063137 43.5627649099623  
34.4896350146096 36.0741672064298 38.1042454705119 39.4410515050885  
34.4570158133896

TMEM167A 54.5358897781765 49.4982025424177 62.3245608177257  
77.7973642829228 48.7288537840562 48.4758590019384 50.5252048155459  
63.287067794195 62.7977686460693 52.7972156492746 47.9942520395434  
47.3172462673426

TMEM167B 169.561107057293 163.860910729725 163.602952119927  
186.395673402867 147.704325041249 227.843903680287 126.930102684077  
139.925369282704 187.486245101512 282.328238928883 273.540763256424  
253.010885406317

TMEM168 61.8529316708431 84.5572894783679 106.912316023598  
70.0402992940342 91.2681347227088 75.353039684456 69.3468840908665  
69.6473843718254 101.46584765758 84.1639779987105 84.1112814779578  
87.8967913380047

TMEM169 43.6706764143908 37.1685072112618 44.5134109184888  
43.8002456102021 37.3508690072156 45.2852528185486 48.8319884367456  
56.3560498705517 40.0403898620771 42.5664883002833 43.0016969050339  
40.6614700944853

TMEM16A 86.9816932158186 161.092366817598 250.504350952583  
47.6687908290818 58.037539503209 51.8103411703261 60.5125774827425  
107.122319086614 156.174166381986 117.881330279882 157.639656300073  
60.4872675915085

TMEM16B 46.3390850717989 48.6447083765118 55.094385444315  
46.3203995372658 48.5000946421718 45.7300501624017 39.7576136507593  
44.2159020605784 40.4997186069494 47.1001757441025 42.911855821602  
45.8546719310325

TMEM16C 44.8914371498528 41.2598458726002 46.6588655218735  
47.0874209746031 40.9950639693255 44.7804080899431 48.0283573444179  
40.2382908228517 45.7452456977857 40.5090849993014 39.8184668132023  
45.7562276914441

TMEM16D 41.3387790895716 41.9894412416874 35.8265993915844  
36.890925044696 53.5594683028749 44.8872784170036 39.1539892144371  
36.3405039629059 39.1790517315259 44.0409178714232 55.3147456054175  
45.4799270968969

TMEM16J 37.3463875295726 41.0678614026819 37.3687900733549  
41.7614975630362 37.0526522140242 39.8455060654531 41.0381860307445  
40.931294690669 37.4540772310118 38.3092241935352 39.9070785037411  
41.1554481567603

TMEM17 2791.75465171135 1726.90584784425 1707.92349760322  
1896.06380611235 1480.95754707554 1228.1735887278 1716.82239359769

2621.65272077828 1250.15619347362 3391.65926812276 3502.80810319252  
2755.23573327276  
TMMEM170A 65.0721641331632 103.289476128549 79.8773095098789  
85.5959901987745 72.6675345946258 66.7278011183421 70.8835636550472  
98.8478655411492 77.0703146713865 45.3530683538086 61.6084234634424  
82.6796854569122  
TMMEM171 52.0299937917925 43.1805016690297 48.0191002461099  
50.8567345921473 51.4527545197672 39.0266821712099 40.7910160811527  
38.956280281655 59.9770720847728 46.6598879466655 45.5707650534259  
39.9519547348106  
TMMEM173 1014.6400720037 301.257549182222 267.427827956058  
404.051373731802 161.422918681934 309.198075383525 87.8746766762445  
184.162452344446 175.28322146764 273.891856200567 240.934550408797  
230.401917528056  
TMMEM174 40.0557788909923 37.2810767789306 48.0191002461099  
38.8495095797881 39.2608760193011 36.6271061451613 38.0598374201407  
35.6825474397235 40.4997186069494 43.401782064778 31.859589438824  
40.8681871019812  
TMMEM175 114.535461066963 150.801729138762 306.746364062777  
149.260740603715 164.997214765625 145.583868248675 133.344625514809  
107.844799332742 163.299997237276 191.811190401876 285.757720177356  
160.385057525357  
TMMEM176A 106.027997253013 114.161435210562 54.5191471810265  
212.64342554355 92.3034609409756 86.0630164348952 46.8613212048981  
97.5962784863854 48.3119523820103 63.7836577144372 55.4694986901287  
59.8760452220989  
TMMEM176B 63.9851732498913 57.5197017161209 44.0451487108213  
74.4365426051588 49.0828761839116 56.6172748471831 40.7910160811527  
59.8760452220989 51.5229124652769 40.8970401536578 50.1649089793069  
46.4499258373233  
TMMEM177 145.193498675059 100.616027485975 116.080897948094  
79.262977183608 222.16475904496 106.067766766889 133.060894083935  
124.324905704041 152.250444470971 95.0026207727863 124.815448107572  
103.561100886469  
TMMEM178 60.6441065119394 55.9644250454789 147.137598111239  
41.9620007529243 44.7829632472754 51.5522731200852 47.1345949868029  
47.5950227477807 46.5411372437515 66.5976612069354 54.0374522273907  
73.0770820500921  
TMMEM179 38.957687788868 37.920964499903 35.2101597814352  
40.0698728584484 33.0463640202858 30.7058829591553 38.5066108855005  
37.33030683349 37.5469247328848 36.2435874904689 39.9070785037411  
37.0953622406687  
TMMEM18 79.5531316151328 66.5864907685351 62.5610562594275  
67.3439996689706 56.2305155589239 89.7554896946341 53.9383247100435  
57.6684494624163 70.3613168347492 89.6670947876322 80.9024704745445  
68.6047087267554  
TMMEM180 55.3153799233744 53.1278271804774 53.4743535852344  
85.7983996395757 70.3677225924146 45.6129956328415 85.8154958329408  
46.7980335276155 59.7483827511172 42.9866214102525 49.7363778831003  
39.4490233720848  
TMMEM181 801.351998609551 560.954913956997 722.862413305704  
429.65084326307 351.188432232165 438.681666410245 431.168903637888  
454.701322158431 299.240215762404 1086.12171444149 1004.28134410536  
940.781370938596

TMEM182 43.4626049853157 36.2103905554984 45.2313723727673  
37.29566077996 44.147557390293 35.7034203372528 47.7390230243778  
46.2779564481158 44.3440839686558 43.7303813515864 49.9338905397767  
47.9566297250148

TMEM183A 1081.97502255142 566.548446430954 590.139974503603  
469.30167430316 631.632335640448 678.684833360104 865.63777294494  
664.178866783226 957.682898193927 431.727858902449 436.497820504526  
576.367042159347

TMEM183B 1009.47177197543 559.9670724278 568.371815312895  
475.310458821086 656.355333007615 501.817654561915 810.382224368065  
712.80113322987 861.427193617946 398.049525642349 407.818713538416  
595.790464730847

TMEM184A 71.0340758556049 78.5174639327946 197.868575583033  
36.1562979552173 84.8751572193902 43.0860383229288 61.6544855697851  
67.8061298261394 65.9254098858352 87.7918574811458 74.0420372528779  
98.7331384143685

TMEM184B 273.807348011122 170.682363891841 225.827961496781  
249.942109342324 188.36429659391 156.56745342836 319.722393409101  
303.239819890428 292.389429869034 272.198774144152 213.768352764473  
220.192552354287

TMEM185A 123.739272396278 146.007510897838 173.18824792041  
108.400712514743 167.872060678879 120.02765867291 156.456239358718  
142.48688219605 143.997817398894 158.364437886751 174.058845828966  
137.831070407907

TMEM185B 97.095992167029 94.9365530062692 124.310823604006  
170.804822846738 107.294098632695 98.7446830481164 93.3897477314201  
92.9043863423147 101.708164294697 97.2865629929716 112.817389187023  
108.111248374368

TMEM186 45.7356815244513 49.9547657591437 48.0191002461099  
48.1662933382789 44.7829632472754 48.0350549043063 50.2016912396771  
44.2159020605784 44.2607789091176 40.4136535208406 46.7386599624801  
46.6397391251762

TMEM188 173.262440365651 141.501071047479 223.397586938079  
175.529493306927 90.385018479478 170.560304063093 150.789911774534  
93.879589378061 146.551751666276 128.365609268093 162.000275136397  
156.088284999883

TMEM189 137.52864596636 171.205726660714 148.158262886253  
139.101561420631 177.047048502104 97.0666517150668 162.32721608943  
172.990533342251 227.317566600324 218.400420636994 180.663636520073  
159.747484721905

TMEM189-UBE2V1 78.4692960800668 145.193498675059 109.481322353402  
70.2541961995753 127.46182304081 74.5674342324036 84.3946154220195  
70.8288090024328 125.52123746909 62.5610562594275 74.9820339135242  
81.8648220673828

TMEM19 39.4710743516517 39.6123051184545 45.7968648044613  
36.5393857306744 41.9842695818285 33.895835691032 38.6243997507646  
39.0620487644635 46.2027193115397 45.2556760873335 42.170702295259  
40.6614700944853

TMEM190 38.6454098044474 38.6414316877471 38.4043916290561  
42.6913548400127 39.6535880152834 43.8582747295766 43.3262148375525  
38.1835938174625 36.2733735494625 37.7315666632629 36.6298807161755  
34.9138625012006

TMEM191B 62.9553576299033 80.9663216993544 49.5839230147011  
46.5237495629567 63.3638417360105 44.0804700754786 53.6575817291727

47.248466636841 60.6505672212119 50.7116312517035 47.8029841385514  
47.8472928419101  
TMEM192 55.5276281380084 77.4676205299631 80.4060693489113  
59.4674205670657 109.017269529278 65.564930068976 67.2811786080606  
47.8947595316832 73.2144205844199 56.9463858443402 60.8201366212589  
72.8817990031077  
TMEM194 102.655050997714 72.2016884438365 79.3066495980045  
87.6763065012524 125.052841200703 78.730129036128 111.714563124738  
179.186381381821 100.076931518374 86.8691342571214 70.5133836963171  
100.567309348016  
TMEM195 42.442231667357 40.4359177791566 58.0218262176065  
45.5869891570251 41.8806343997257 46.7800033479223 40.0052661202207  
44.6107027295193 39.1790517315259 46.0119912782855 48.7502645382856  
44.8372404608604  
TMEM196 39.8662795144616 40.148780650831 40.931294690669  
39.066284740632 49.7235523248653 48.4758590019384 42.9803717121865  
41.3506832276112 43.4656637536244 45.0155543555707 42.170702295259  
48.3648494350286  
TMEM198 54.5358897781765 54.9392038576957 51.7138050344355  
42.8235313007746 65.0605897122361 54.5952754712007 53.4921736109774  
54.0507720792049 53.3094843669564 54.2830238965339 58.9676332048764  
48.6037684272115  
TMEM199 62.9952378379206 73.2842501003097 66.8632294055679  
82.2766822827861 77.7140342228764 61.9432904657734 93.2133061608764  
89.5130163419167 79.4528447794527 73.7133884699889 68.4659783447092  
85.5175308034109  
TMEM2 437.693269824303 548.387793019855 273.981867154936 312.19993077414  
313.711588658312 273.593213694396 569.074678179054 928.230419226078  
212.712025285843 392.796524588309 554.163106145921 348.862367731887  
TMEM20 46.3390850717989 71.1595608255838 64.0162246399972  
54.2886483704949 114.093655272795 45.6129956328415 59.9792284253187  
54.3820590274321 57.678188678075 48.2596564318071 46.6442692119997  
42.7782216342806  
TMEM200A 97.6205705034407 55.9269493191353 47.3861758958576  
78.270329450618 46.0977687311222 63.3612993417558 65.3694267397114  
69.9709625205629 57.3385421837183 62.6984594468418 56.0477607422828  
44.6484005362281  
TMEM200B 35.0202257459026 39.5050383901884 34.0382693188794  
38.0958223740111 34.7018263647985 34.7983399096627 36.634024014558  
38.2782436497441 35.1155486926999 39.4710743516517 40.723990462047  
42.9887069977696  
TMEM201 55.8709511400674 52.1062000766427 53.3127618245672  
39.6705473876526 61.7009619624746 49.8472708021525 49.6872467499977  
54.6476581536041 52.3187919317561 49.3000844711116 50.6726688944968  
44.3521099857368  
TMEM202 39.4710743516517 41.3277288245157 41.8389336728199  
39.0156305603334 37.956732373465 43.4681646416585 42.8036731479932  
41.2551966132486 37.5723609429239 43.781101409552 38.4251036088595  
42.6278608611758  
TMEM203 483.416873464931 384.624816045174 249.995119246929  
264.718875269207 393.337170271481 291.086512261106 515.409979010663  
284.241284057415 318.069132873489 420.761600667193 392.237227927376  
335.655540947167

TMEM205 831.578043520215 983.200149701633 2061.66570137425  
1103.90449800536 1578.32969650385 853.947671456736 652.480459437977  
1137.99307039386 1157.65264077595 2581.34849558524 2966.53151444114  
2266.34088015654

TMEM207 59.046385957117 52.1967540852276 53.7792717770978  
73.3725472767369 60.4122350478242 56.1671440556142 51.5967098638347  
56.8094693588238 61.8445915808329 62.9205616877344 57.8111054584154  
53.9431600945419

TMEM209 134.743068051122 213.655570682141 212.395308461139  
140.662969373546 345.443895623911 156.150710793563 159.176229924883  
160.973602503707 208.529062113623 147.945429978177 182.37433006793  
171.073367662623

TMEM211 41.1523487516364 40.3384318592985 38.8775560911841  
37.0732977341185 39.3667161654772 38.9378717994178 39.0458123429605  
42.6450179841129 38.9006788676407 42.3606390470387 40.547835538778  
35.6427313468066

TMEM213 37.0320432433314 39.2907645923217 44.8872784170036  
36.7892997857376 38.3561682218911 42.157627240486 39.1539892144371  
38.5457716679071 39.1790517315259 39.5637454855233 40.0766543123257  
34.3409660445447

TMEM216 168.492959515167 228.08291792003 183.431582521592  
168.492959515167 526.146757036152 230.879083362388 294.443061798191  
165.775214685061 288.816567137193 242.503720442197 230.286815921497  
295.014183084118

TMEM218 145.027715477051 159.147713331732 162.628603963754  
177.584394977912 178.881586334601 148.144200968432 186.450759425396  
171.536394606897 151.975559850216 164.780216383719 196.096147690942  
250.244199415895

TMEM219 883.06773454117 678.684833360104 705.283979182062  
584.724083441601 829.152040996817 555.044139654886 500.241231327789  
1294.42501356365 373.46798029115 1379.51119430451 1169.14891282789  
643.9329225331

TMEM22 51.5033727579864 54.8439819445945 57.50915811428  
53.9517841438975 66.5187917407182 66.295597720304 56.4809146784765  
46.8954576545929 55.1253465069845 64.8549209064366 61.6084234634424  
60.5948704279864

TMEM220 46.3390850717989 39.3999056968598 43.401782064778  
44.550322123994 47.3172462673426 42.8598805316863 40.4359177791566  
42.5435283762933 42.6366765186182 43.2988017098387 45.2265319826548  
44.8372404608604

TMEM222 107.325456368022 93.3718038663074 65.49167373382  
108.660169650259 83.1614238528477 78.9521593412581 151.795609904857  
161.205086002542 93.0888239577809 120.274848052394 130.524308471577  
78.7496673195407

TMEM25 71.6849360818041 48.7847528954724 54.7855575216687  
42.6913548400127 48.3814421939888 48.8744644207821 45.3597029614942  
82.7269382676336 44.8997235283254 47.9056710878325 78.4590546118913  
49.9692385479389

TMEM26 54.691568065544 52.7493349111555 38.5045333213784  
64.2130157241811 44.2607789091176 43.0860383229288 40.3302268293707  
51.2623287419357 40.0403898620771 40.2112371512838 52.2759825608835  
42.2577689927563

TMEM27 40.9558083259517 46.9919960628953 40.8420925848403  
46.0228732507872 44.7829632472754 53.2046867327331 55.2088411137193

39.2672712041774 49.9162522057712 52.3304586399695 42.8263096141654  
45.0985088502363  
TMEM30A 122.720768249799 146.763378089693 125.52123746909  
141.69593269802 89.0203733091224 127.87945182399 135.398193235699  
109.649431670339 101.681822254799 235.613437037284 215.399634344016  
171.992427227088  
TMEM30B 241.706783147271 269.618616631857 436.497820504526  
53.2046867327331 164.072453709966 78.9521593412581 312.19993077414  
291.867370164212 663.904584382358 1040.102982885 963.224016480187  
1014.6400720037  
TMEM31 45.9090659324223 43.5182502375207 54.5191471810265  
40.1804147506786 39.9697332660833 48.9826868640753 43.0930293831497  
53.3094843669564 45.0997987980157 48.3693338695392 40.723990462047  
42.7782216342806  
TMEM32 259.43283734195 331.390452289344 372.421330252979  
426.933064567744 386.640440174303 557.717744882602 353.868749867979  
274.398580571984 304.977139992391 375.354746298695 315.186937216422  
379.098697147575  
TMEM33 60.8357760968871 76.1682394916873 86.500678864429  
95.7571966348067 73.5541045639348 67.8208976798364 66.5422130374814  
88.9038123445083 93.5665536754775 81.2992152187529 73.0970339739187  
85.1981126713031  
TMEM34 46.8141313516997 49.6841415268611 57.1226931773006  
63.1604223919703 70.6903168772326 59.9876575158981 59.0457625163577  
59.7744650739434 57.0301170427216 60.8730416435467 60.0765286625112  
58.4200819624972  
TMEM35 44.8914371498528 48.3077814647455 40.6737160001291  
51.949834638817 46.1804647841331 144.17470770145 85.6236091398006  
45.4757965005055 54.2825877218965 75.7140064167134 60.7516146716018  
62.7669079605627  
TMEM37 62.6702927225656 65.9098543816057 59.9690744676539  
71.0211264570699 62.4267404482092 71.1607965028029 58.0969258817391  
49.6203214143464 81.066448172567 59.5785089386245 62.9336909080086  
48.8670821164567  
TMEM38A 36.1232327599945 40.2493681589104 36.6522278218553  
42.4580504587581 43.004943518025 35.7034203372528 41.1507980856436  
47.2009420656854 38.8271346375425 41.6373771565199 38.5668610487033  
39.2469742642337  
TMEM38B 49.906758177954 49.9547657591437 48.6494451061637  
131.824854999638 63.5441268694915 57.5570747859662 59.1040441894478  
49.5185112777773 73.9416745419036 44.3648993568405 47.5733603903505  
58.47356854625  
TMEM39A 108.815245119101 77.8946473414547 71.8706847571669  
100.774098314706 125.052841200703 98.8478655411492 65.0031119608637  
89.2385568686014 67.7662831916293 68.8167148906225 85.5175308034109  
77.1059855034406  
TMEM39B 153.153205095999 163.860910729725 183.584085676174  
142.945182805248 225.827961496781 145.583868248675 207.18510695093  
123.800965644574 298.771150048863 235.33716196909 200.591114641608  
153.081027338185  
TMEM4 289.975375372371 262.865950409375 199.007437365676 254.159017331462  
216.358862796367 191.631209717054 341.302185430613 388.661268904002  
290.956194006554 175.028390974125 175.960838580876 234.525867965735



TMEM40 45.2875173643252 77.518381991736 136.657213529097  
50.8567345921473 48.3814421939888 43.9724628401189 83.5149142053137  
55.9303347977781 95.7194132679937 98.4084364053686 93.6717518147993  
94.3229189690855

TMEM41A 114.016824404095 104.305801811472 167.229755109155  
53.0284011078097 244.619512279744 74.6375749739389 118.089250727398  
61.3077641493507 112.014137492029 64.8549209064366 101.065203693106  
95.9391851122771

TMEM41B 168.640033281185 204.502683458676 288.065258507995  
224.871193467078 182.601427407211 143.391384762612 148.440257128143  
223.168185178205 294.698849594622 410.402285012885 307.002236094206  
321.26586939039

TMEM42 118.762101740563 95.2833228196616 138.81810375553  
122.548989126048 250.176074707634 135.737771384104 157.463465828715  
97.5962784863854 161.156612172544 155.406719968961 153.595112580363  
135.012695962236

TMEM43 669.776067547468 643.491217668415 668.961646543849  
425.692369974286 827.365231733511 741.908952472992 532.465842165105  
618.892379887961 463.022816882856 634.514100741768 662.848386826617  
732.454837219705

TMEM44 57.934905173625 69.4047473173218 68.5544784190048  
53.9517841438975 73.5541045639348 54.0382756991549 84.2213498413102  
66.6951654336154 71.9369353731849 52.9603588177082 48.1352470945488  
59.1514832343922

TMEM45A 182.091945578277 55.3141112947345 161.910748720932  
118.010166045155 60.7999610195859 84.8235093165193 42.0605906240248  
60.3366440660852 124.687212034276 66.3481553496766 65.342842101283  
64.4766262198475

TMEM45B 76.309158701514 117.598001907902 81.8648220673828  
36.4564050256915 48.3814421939888 49.641159251878 105.802035886293  
220.896780388946 79.9391673512018 107.722626390174 137.802147212644  
199.264520680174

TMEM47 139.855023065402 138.738440901853 138.50445813694  
106.20479137406 111.77505926669 268.097966292089 134.162430146473  
154.370850473737 503.187121806288 342.923254301057 332.933704863586  
510.232992765054

TMEM48 86.0796981361148 103.883220270094 101.693848821246  
68.4261608261522 158.918242816842 61.3620062177524 84.260633540656  
127.797511870397 105.796515736125 48.7414853386615 51.6414075056938  
66.4626619269287

TMEM49 1097.92519921873 848.079114196986 1047.33749100342  
1125.81685334899 587.060466667911 589.685739519627 894.486674059951  
1601.52194699063 1060.64261592822 447.709872889701 419.993482471924  
480.523317843042

TMEM5 245.996655628334 248.482699989877 319.043862813161 144.657263336504  
273.349866592589 265.026710493466 229.584451980272 157.927114480316  
269.284584971871 185.395460281034 230.594000005581 285.97627172608

TMEM50A 54.3554233228353 82.1344514651393 63.1450855271137  
83.014860007187 84.4230484528318 72.2544131004774 64.0985088513857  
62.6984594468418 87.4335749014848 70.7003843117511 66.1229691315616  
87.1109435144663

TMEM50B 166.717256080341 313.711588658312 352.843053667822  
193.468773556057 269.857104259782 278.629995328901 233.90802199627

284.394749574694 451.437791473506 374.850749726567 350.917244438732  
378.964387825252  
TMMEM51 1096.1705171588 1516.33074288338 1082.73916102398  
974.296760034984 616.265771322835 287.981727851442 1783.87583818834  
1910.5347560855 1023.81381775221 1526.94101719128 1243.32650314893  
1501.67042548971  
TMMEM52 48.9906383294199 48.4497719907777 44.7829632472754  
48.4916117779992 110.599131324937 44.4619248757502 45.7452456977857  
51.7538628098347 51.9545473262296 37.4302011516587 42.911855821602  
44.4475838947656  
TMMEM53 81.3544712349691 51.9421032049606 57.1226931773006  
45.5869891570251 51.5888395924843 42.750861693377 71.193768715137  
49.2019743609873 68.8353800542132 47.611018474151 52.2229654768933  
48.1627097465883  
TMMEM54 374.427492246826 1004.28134410536 706.914069768466  
115.048869605875 467.884559162462 228.08291792003 677.855726232203  
737.604036996153 642.946369683508 621.489785652602 572.968592371501  
332.933704863586  
TMMEM55A 66.9417866448504 59.9682734755814 60.3155766445629  
98.8657527308305 66.8733921725051 206.559526386642 60.0981687048269  
58.2043532960091 64.0541263553251 112.281286038716 107.28550551509  
102.77259665192  
TMMEM55B 222.570136481811 195.430996540859 181.064239330482  
310.120875196999 124.490684428024 154.355197155161 154.287396750021  
141.611097024526 183.690616959682 163.048439401341 205.789533350801  
161.38599012777  
TMMEM56 41.8409927585705 33.4316681623175 49.2041300973417  
37.9875302985336 40.3452320167286 59.4949177415847 43.0930293831497  
42.0494116081998 56.9320717885002 39.9948390976317 41.0050831223107  
60.2550788540864  
TMMEM57 78.6705291023488 76.093116738739 66.4079972657486  
71.1583251698218 96.332996264667 60.877229406755 85.0342118119783  
121.510087314197 78.5174639327946 64.8549209064366 56.7765567227989  
57.0524725494273  
TMMEM59 1752.11152588494 2966.53151444114 3966.51586153125  
1395.33665255999 2266.34088015654 1806.22468459769 1868.51164332659  
1582.45600339543 2878.82618761804 2733.80542760533 2313.21212353993  
2528.6392272518  
TMMEM60 390.202312411165 185.474249522831 218.773587021224  
261.977107410546 208.504992019122 246.500690127803 210.096514889445  
151.190816985164 315.139359883556 193.15756263121 242.080992016235  
293.702642091269  
TMMEM61 45.7356815244513 42.1607322031054 42.3536549114165  
50.8567345921473 43.4544762830742 43.2805590023412 54.0170817319522  
46.3685439301234 46.6944238390932 45.7911932481722 45.8180710486329  
54.9919060580109  
TMMEM62 340.311633794489 200.318682162912 113.6408244935  
138.189579100482 178.624349589089 129.299077627671 280.870472307893  
224.231862271463 277.878824242495 279.063292799015 285.187681119318  
206.261432452217  
TMMEM63A 106.027997253013 176.75369241505 189.890451486324  
98.0023132593711 128.749209040345 49.4157684139858 175.960838580876  
103.734064904898 164.462951076718 183.799353414581 202.627009037401  
180.679129876248

TMEM63B 86.9816932158186 64.3312319756553 77.9085946827079  
53.3967242431461 65.5029051840465 53.9517841438975 69.6301237585571  
49.5185112777773 80.3805507705979 100.271925566074 76.8713035584472  
65.7853960266587

TMEM63C 43.4626049853157 37.920964499903 38.5045333213784  
40.8681871019812 38.9496515344837 41.159706131351 44.9863726205428  
43.7396619462033 38.8271346375425 41.9666541498638 40.2649309204478  
42.6758568421347

TMEM64 54.0170817319522 76.1682394916873 62.9835084197147  
62.3936376596431 109.255307556049 61.5824518349507 140.662969373546  
74.2517888452553 72.9752827496503 49.5265949137207 62.6601624592906  
63.0733654065132

TMEM65 42.7150227340364 45.4882438975269 45.5883690965192  
45.4634652319753 42.3685136297603 45.6129956328415 52.8496345990125  
45.2806199505029 47.0804681460898 47.4767851750188 42.170702295259  
44.2527566343661

TMEM66 1228.1735887278 1080.43016747082 2096.51999792183  
1881.7281441986 651.621028098039 1311.88650141004 866.712228831149  
999.862452730252 831.578043520215 1939.66920192372 1575.71609894038  
1969.8871504719

TMEM67 47.7267190613906 50.1833483241864 47.3861758958576  
43.3078542962968 75.1853590860646 54.6571265188154 43.4544762830742  
43.9604529016594 51.2066664465185 42.9866214102525 41.7651272076914  
44.1452943804044

TMEM68 50.379587451669 43.683792219729 53.5698357689852  
50.5310598656998 48.1473938886239 41.7627910693483 40.1235656101329  
43.7396619462033 48.7358147030082 51.5855515705917 45.7328341667151  
47.7962548556026

TMEM69 233.96534264787 327.455030020799 264.004717858009  
215.345160952019 710.831173303701 234.495626550751 493.112119983877  
178.738800467958 518.936896882424 133.43526498879 178.400810392873  
203.092045210928

TMEM70 58.4920021605316 66.53831442217 57.1226931773006  
78.6344248102932 52.2089306840125 91.2681347227088 64.6446465846487  
52.6654109976514 78.7182388025668 64.2848885182563 69.7644070698124  
65.564930068976

TMEM71 50.7390160399184 48.2220547806679 56.6888826857797  
420.761600667193 46.1804647841331 75.5561597374812 98.1371527802953  
48.0582855095143 45.5779686360641 43.401782064778 48.2050207071554  
54.3587260982091

TMEM74 39.266565827316 40.0527893189096 37.4642807402741  
39.066284740632 42.6022652963326 41.2567470068038 43.5627649099623  
40.6171774724171 37.9273653326866 43.0919221375514 45.0589947942306  
39.2469742642337

TMEM75 38.5007204246293 41.8073910693411 45.3974838013476  
36.4564050256915 36.9060997041453 43.2805590023412 42.0605906240248  
38.956280281655 40.4997186069494 35.4990901121893 37.2018803984555  
39.4490233720848

TMEM76 40.0557788909923 43.7644428186265 38.1421709520616  
40.1804147506786 36.8059561571675 42.2577689927563 36.4098694708483  
40.931294690669 37.7384958256497 38.3092241935352 35.2339574411711  
40.0557788909923

TMEM77 112.865496075486 128.635811501506 120.96329303892  
139.101561420631 115.970093171058 154.730266766226 107.610858427836

101.156215957297 111.735319884512 136.293724800658 121.633811243877  
174.332103484796  
TMMEM79 768.354209323884 316.548339196872 388.336994961328  
86.7823828209946 598.970109654466 109.468741823602 353.751797948675  
619.950241162173 332.184073392054 725.2805190537 499.356036793973  
181.064239330482  
TMMEM8 184.989940464859 234.727123301682 364.962649416567 195.765247956108  
180.502282381416 150.636903991608 210.768576894328 113.767996184128  
145.213187433836 117.293778127059 122.469733727349 89.4747568145717  
TMMEM80 52.7948184519106 61.0858212571902 53.4743535852344  
64.9559356780521 66.2702569771609 66.0411740221276 53.4921736109774  
51.0261383607462 63.785471218558 82.5279746006378 70.7045582269595  
70.7522482965051  
TMMEM81 37.6397652536077 38.1312950900467 40.6737160001291  
39.2780515621926 35.3327761997046 34.1806289878747 39.0458123429605  
35.7973685350741 29.9775071862804 35.93950183586 36.8282383070068  
42.0424641526302  
TMMEM82 40.2543341073001 39.1982470626863 44.6032218589199  
37.651298468202 35.9894133432376 36.1190722948669 34.1889222434768  
36.2539950294089 36.3649677956953 33.2987269789328 36.8282383070068  
41.0657892043496  
TMMEM83 35.0202257459026 38.6414316877471 32.7043743065388  
35.6928955245309 38.3561682218911 39.7394181011603 39.8695929627783  
39.0620487644635 40.6957787921451 36.0481934423077 34.6366195121669  
37.4554876386402  
TMMEM84 40.2543341073001 38.4330755397458 45.063792968927  
60.620259884953 38.9496515344837 44.0804700754786 44.9863726205428  
43.4544762830742 38.4344387289956 44.571915452417 40.4504608195666  
43.7672102682067  
TMMEM85 637.565156571985 826.490051619826 458.861461526841  
570.824732318332 1195.24078948059 793.225863118464 983.972164685474  
538.290200196057 655.389317052689 474.155196153863 496.791391622565  
646.323419285676  
TMMEM86A 43.5710871617107 36.6968906669565 42.4580504587581  
44.4367387274922 39.1650142708257 44.0804700754786 47.8947595316832  
44.2159020605784 47.4699236780425 36.8059561571675 43.7585538437696  
43.3744503319109  
TMMEM86B 70.7238101239421 131.738693662183 85.8059456975413  
66.7750249658122 77.9085946827079 56.9320717885002 67.8919712859031  
176.181618993328 100.591821617326 73.4447529556358 70.7760293129408  
72.7015808995427  
TMMEM87A 1932.2647526188 2150.8715161597 1107.96086673001  
981.039763059681 1910.5347560855 1511.33844030783 1858.94179312821  
1549.93897368117 1789.07186722972 1664.00821059181 2004.94135236716  
1254.34397143795  
TMMEM87B 48.7646976789783 72.3297091475814 81.961632059749  
66.224559122062 57.6791750431251 51.1621379498014 59.1774824918359  
52.1788489555942 58.3564461855595 47.1001757441025 53.4921736109774  
65.3585701203568  
TMMEM88 43.2724556187214 92.0880591999243 54.4384603094793  
111.347228208501 53.1884505015411 106.590506599473 68.4380822448123  
121.84142967836 54.4059109100338 68.4137459386155 88.2314365506494  
63.0266170942566

TMEM89 42.3433931248155 46.7591817286632 43.9450023643394  
52.6947911480086 43.844855336215 41.554942319225 45.223075311113  
42.0494116081998 43.2761454096265 46.7646877499666 43.6629145624937  
43.1805016690297  
TMEM9 315.186937216422 222.126944340681 299.334388262225 110.88526946931  
282.603767561794 186.818097299665 297.990925644625 311.985010273921  
377.847116683974 280.239058266018 294.567137562864 136.711122812062  
TMEM91 442.711822532078 141.055218279065 204.130491885587  
142.048367760597 119.291755076832 173.212430860273 153.310447977094  
87.6435494489518 107.222176166001 192.922622120507 209.31241212773  
238.510952165358  
TMEM92 47.8249696958403 46.0023068797812 42.8270038153139  
41.8778873678551 41.8806343997257 40.9506062495231 39.5496902678788  
45.2806199505029 55.6617952786921 42.8936990772838 37.0180934800573  
39.9519547348106  
TMEM93 288.923207993626 257.761541860837 221.277023931945  
201.427008153788 327.984902171255 200.698372627272 401.956364010068  
184.65212689433 228.882072078733 137.197328985851 161.7095047889  
180.930509520136  
TMEM95 39.1590964332473 38.9338521051669 36.178547300352  
47.2009420656854 34.0927410219282 38.6414316877471 37.830876898596  
45.3872406432794 39.6609238036815 39.4710743516517 38.4689132737495  
37.2810767789306  
TMEM97 359.940393399742 975.02086340962 549.67905283016  
242.8665988001 1031.4414268329 298.282957415786 1343.66876893729  
2951.88559311416 852.769974690777 918.083610591772 1089.08276262641  
531.69595054137  
TMEM98 270.303708972854 144.348025939706 60.1874689914535  
125.197314240529 122.482560090133 243.898313340098 410.058119360034  
354.38923772101 335.818251279914 270.110273110996 283.111920665176  
222.92930674999  
TMEM99 183.393353108744 114.617965877564 162.908986027874  
92.4016365536782 236.178265404264 92.0136417064806 161.205086002542  
156.770274308736 183.2003374677 140.961217055867 133.626390404589  
154.891160328731  
TMEM9B 341.97050042695 522.377154567257 552.860979481958  
410.058119360034 274.994470779348 319.248898194029 266.129007472128  
373.077564417927 629.301646370726 851.813216452015 736.405815842011  
544.355979695242  
TMF1 68.2184093305248 67.2649356062263 66.6332042895961 88.2314365506494  
62.5517224560726 60.877229406755 64.0291286735557 58.1521928484154  
64.5347406608537 49.3000844711116 54.9194306828726 73.1447139654971  
TMIE 33.8558232866797 38.9338521051669 43.9450023643394 53.8086134112366  
54.2301964914419 34.5886782974123 42.357910063876 31.7063377004409  
39.853866204927 38.957687788868 44.553780984244 46.1592873342534  
TMIGD1 43.1805016690297 40.8880530359822 45.6989664108554  
43.074472921841 47.8075998240396 43.4681646416585 44.3440839686558  
44.2159020605784 41.863927676552 39.0648733099061 40.9157352260901  
43.1805016690297  
TMIGD2 38.0089018744739 38.1312950900467 39.5450079747895  
38.9534635879195 42.4864576619427 39.2248354955045 34.9344532055397  
37.6557714476853 38.3418933808844 33.8984830800739 41.5421429082231  
38.5279745308203

TMLHE 60.3381680822012 54.5374188496807 61.2153068100932 70.3871361660046  
88.051652677564 74.6375749739389 83.616030092144 71.5616860050001  
62.9922928277769 85.4420599474339 70.7374779228539 77.0514384834854  
TMOD1 62.3042205863409 43.8495248991589 44.0451487108213 48.4916117779992  
36.08956004634 449.564281713066 71.5249259772583 55.9303347977781  
41.3803269429468 167.678403380953 202.983984966874 155.378768637562  
TMOD2 37.2474303302343 37.5469247328848 37.9482157381008 39.6292788039793  
34.0927410219282 36.6271061451613 35.2163900400329 41.7419877611072  
38.8271346375425 44.1379638573455 35.3362091871364 38.5279745308203  
TMOD3 47.3289285415289 57.3417959180493 40.6312687664188 51.2973486610884  
43.7783560914188 41.9543948167375 48.8319884367456 42.6913548400127  
57.404059248727 42.8414096678708 44.553780984244 45.4799270968969  
TMOD4 44.3355304829989 47.6229101519945 61.0370242377391 44.6905691366696  
54.0126916508417 139.883681090758 48.9826868640753 53.9465584609317  
50.401623258584 52.8928296360463 54.5711704180349 53.3904307221902  
TMPO 47.6061120397122 58.7460488758053 52.260196361018 43.9282059368202  
75.0665411373616 52.1519713442163 78.562924024292 50.1833483241864  
82.9431583622036 39.4710743516517 44.3474518504781 43.0930293831497  
TMPRSS11A 38.5007204246293 37.8217989841918 42.5406888281114  
41.1886975241176 42.6022652963326 40.4359177791566 43.9450023643394  
42.4580504587581 37.6383530120621 42.9866214102525 38.5668610487033  
46.5650556481721  
TMPRSS11B 37.3463875295726 36.9994058279362 40.301483914446  
44.4367387274922 41.6806984441849 38.4330755397458 41.5817737564592  
50.857522488428 42.7150227340364 37.2089297656361 36.7283081422707  
38.8495095797881  
TMPRSS11D 67.8774399765179 36.6002100641539 42.5406888281114  
45.0798408927912 43.1252272136667 39.7394181011603 40.3302268293707  
59.0262390168156 38.1169703906207 40.1179210534118 40.4504608195666  
37.6557714476853  
TMPRSS11E 40.0557788909923 37.10170285405 38.5045333213784  
38.8495095797881 43.5544347011646 42.4580504587581 43.0930293831497  
39.4710743516517 35.4332080966594 39.7835513496873 41.3553369544097  
42.7782216342806  
TMPRSS11F 44.8914371498528 45.9266745571724 42.9104454767916  
48.9944486068347 46.4343327861696 46.263826584899 46.0228732507872  
46.0633179231318 42.6366765186182 32.6203270051744 40.9157352260901  
41.5536168238478  
TMPRSS12 39.1059888887285 38.6704566269103 46.4150464549477  
35.9521941716188 41.0885562160946 38.3000131612011 39.7162631015511  
40.2819379659218 36.87840425987 41.6724739851995 40.9157352260901  
44.4475838947656  
TMPRSS13 179.360587856432 43.4396866157171 37.4642807402741  
44.7980740332174 40.9950639693255 47.4699236780425 42.0605906240248  
48.1591264215184 42.992884918158 45.0155543555707 43.4709415392696  
37.5556299264699  
TMPRSS2 71.5484567134601 424.182335137838 303.93332785291  
44.9370339275041 380.098235864256 74.6375749739389 606.378839153932  
1686.40194722823 250.457603010506 179.767874494671 230.594000005581  
253.010885406317  
TMPRSS3 43.5186590457613 45.7600746694802 40.5273461639516  
40.9607305725196 40.9489038401156 39.0688239032662 44.8643898647322  
44.8662213018279 50.0700052198335 36.6345750222832 41.1426570149164  
41.5937402943136

TMPRSS4 111.397578350396 84.9182861692273 232.147792636393  
 45.2759158146116 40.7779767565889 48.1591264215184 47.3661873039785  
 53.838484549134 251.2365884576 122.301290485889 120.240956797301  
 263.21493129287  
 TMPRSS5 40.6559419616644 42.6022652963326 38.5045333213784  
 44.4367387274922 37.2567512265363 35.4142595025086 40.9157352260901  
 44.797320243931 41.074824727477 35.8304004211528 34.174642681781  
 38.2350720635382  
 TMPRSS6 67.4846787600629 36.6002100641539 38.1421709520616  
 39.2780515621926 37.956732373465 38.5252456306656 41.8315602975157  
 39.3709357615493 45.0017158586743 36.8059561571675 36.9060997041453  
 38.1421709520616  
 TMPRSS7 42.466333667839 44.8955824420372 48.3847843498476  
 49.260242314197 48.0234896130991 43.5416683728269 48.260931742163  
 39.1128725343972 46.9739160257217 55.1089864632456 54.4140381300469  
 49.2731519807085  
 TMPRSS9 39.9697332660833 40.7952353240579 41.1367478979484  
 37.29566077996 40.0599807618105 40.7616966228404 38.7337086062875  
 39.0620487644635 37.5469247328848 40.8049408996274 38.1835938174625  
 42.57175366709  
 TMSB10 10910.7672404363 6555.04068292972 6356.05807792831  
 8144.52133665388 3838.19449971537 5971.45293864208 8827.37298329149  
 8937.3846214861 5636.93532853955 3653.59181300011 3634.98300564068  
 4406.55576617324  
 TMSB4X 10235.3288951482 9488.06491634484 9326.9018948838  
 10072.2414399735 8259.38594893529 7075.82842238887 7562.42822724655  
 9488.06491634484 8349.59691588869 5733.54417656207 5855.6498679729  
 6555.04068292972  
 TMSB4Y 33.9561816279577 57.7757446006652 42.0621425894624  
 45.8844325913247 38.6454098044474 62.0660509811111 75.8779316255794  
 48.1591264215184 65.4784797364469 61.7502624458447 76.0420039542595  
 76.5411379733694  
 TMSL8 57.2960245538881 52.3187919317561 51.7138050344355 71.2572485987604  
 70.6903168772326 39.6251842352088 259.626847216881 230.649032296928  
 83.4465817617201 35.93950183586 39.3667161654772 45.0035308952466  
 TMTC1 52.310270746917 51.3800036046133 41.6977706798234 59.4674205670657  
 48.6224651100733 110.637910297739 45.8311458106942 54.3344262267094  
 65.3672880026114 61.3529667465225 69.1945249877407 76.3334723210842  
 TMTC2 44.3355304829989 55.5294887653184 70.6592421895338 43.6726153508978  
 53.8260140375214 74.0995052892511 74.416117986276 54.8412943008635  
 83.9387217886961 51.5855515705917 75.5799609581534 76.4580830432622  
 TMTC3 46.3884811643547 55.2182004838121 53.9256409473463 45.3882138838137  
 51.7983110178095 55.8938720883203 48.260931742163 45.9604707098953  
 62.58750768974 46.0713306971594 51.413025495745 66.2027948645675  
 TMTC4 73.4899394858239 84.8694815443111 59.5844022026141 46.5578790409334  
 80.0183739952818 49.5424425850549 78.8250642061439 61.1851254827343  
 59.5612330871274 60.0372015630618 57.6171094774963 63.1780854659428  
 TMUB1 595.012422454829 677.855726232203 607.431621448599 358.083401917765  
 543.975237512604 330.470972281607 765.145138238955 323.855522995794  
 805.87120346756 666.265306908449 670.958499409833 363.947777340854  
 TMUB2 155.435700005184 131.347995391441 173.992867985744 135.997802304719  
 140.199798713912 146.133951379664 159.949298350852 132.37539586883  
 142.789889238338 179.552011806692 159.949298350852 131.779333469955

TNC 273.460165751162 66.6332042895961 87.8170592981737 204.318269745079  
64.2690842803282 65.0774755750423 43.8206425661746 126.528654651607  
51.9302027391447 74.7853626582536 114.78317743597 102.38706554984  
TncRNA 43.3638918705225 52.8796369426118 58.7382738968248  
80.4007868743886 63.3638417360105 49.7458652239071 57.4047331041592  
50.628152951493 55.2114969675545 47.1001757441025 52.5154971256566  
49.4786466722535  
TNF 42.2455707947223 58.174555206394 57.2107492415265 240.476103976894  
54.802736966312 55.8243694410835 63.7721358300879 42.7431359850339  
43.8482802038826 38.8507804383261 40.9157352260901 34.1509644696334  
TNFAIP1 151.815294281745 171.536394606897 200.41782363596  
123.841740274811 156.615248744544 142.262349841307 165.843728663632  
226.168990555083 199.264520680174 132.851109034738 148.608392563633  
181.844123841452  
TNFAIP2 451.711598030737 226.023657887826 642.211963248041  
306.174148874454 471.446000105333 163.643603259911 460.994460486229  
1159.77262479002 607.042450917813 376.931257615162 387.471577602679  
383.779263351825  
TNFAIP3 119.993761317523 267.70610731202 201.330854646158  
2096.51999792183 260.426488908824 384.727543700024 348.206465194205  
438.681666410245 90.4957279507369 72.834275688835 73.408861359425  
78.6705291023488  
TNFAIP6 113.767996184128 52.153603364404 62.0500352705887  
745.219025960188 73.6323065529916 186.450759425396 80.9514944341907  
82.5170409503063 40.9901805728485 47.7180816682562 50.9246396457383  
66.3944891131864  
TNFAIP8 72.9154861179393 66.2702569771609 71.408876667815  
130.192692323611 56.6557577134933 55.3202238943712 59.1040441894478  
53.1699994703719 60.7103211409901 43.9783383422823 52.2495455383818  
78.8968326770219  
TNFAIP8L1 51.413025495745 90.2721521466478 73.7945470201829  
61.5515639412892 64.3571664944642 57.8005007012205 80.2289541115146  
46.4672637826582 61.3733228199803 42.4594149893798 57.2979215534929  
52.1918130336397  
TNFAIP8L2 41.1523487516364 44.6918600441328 42.4580504587581  
71.2572485987604 42.7982502551634 48.3686935595826 47.5963750520409  
42.2577689927563 42.0621425894624 41.2276963324981 41.0050831223107  
44.8372404608604  
TNFAIP8L3 50.4872122867759 43.4396866157171 42.8270038153139  
60.7741670229412 43.9450023643394 132.257197568848 49.3854238365325  
48.3590401011623 42.1594905198929 81.915829566737 86.6798536307388  
83.4319236092932  
TNFRSF10A 56.0477607422828 86.0630164348952 145.250323683031  
105.45765455249 72.6675345946258 50.4022543872993 60.3928833351886  
56.9299697426319 59.8158518516035 49.8393069675192 55.6151308605445  
62.7669079605627  
TNFRSF10B 91.7158434954226 117.869393694564 139.385367339095  
128.38299874379 91.3362264594431 77.7907484334847 89.9284109077375  
80.1665291227124 102.177189421378 101.250422688816 89.2913927776683  
103.513421757522  
TNFRSF10C 53.8856501960117 42.4493032770053 50.9010149857308  
66.224559122062 48.3814421939888 50.9724155054821 47.7390230243778  
50.1833483241864 56.657759220121 47.2299678280724 49.532546810992  
56.2804354745795



TNFRSF10D 36.7356360093603 41.0678614026819 36.8730514568925  
39.066284740632 32.325260431418 39.8455060654531 39.3585350448719  
28.3262844159644 34.6720534245631 34.7308008643142 35.5179217192467  
38.8495095797881

TNFRSF11A 42.0532901689036 36.89524015739 36.4564050256915  
39.3750969348308 36.3390947880186 31.5556621809114 31.3222361955842  
36.43924066428 29.5408011993809 34.064698871541 26.6357008041456  
39.7411455670172

TNFRSF11B 41.6354649482853 92.8951148347802 51.8122261766744  
63.0153175111747 47.2074332636566 44.3648993568405 40.6750540874299  
76.2258667419953 41.074824727477 37.8217989841918 49.3901004211918  
50.2163892855092

TNFRSF12A 338.656401813365 101.426462865382 138.292681458047  
127.789065386943 153.660685857642 96.034706957068 91.0154871536701  
209.33818226065 225.161257242118 66.274247400793 104.135574209392  
152.47776741936

TNFRSF13B 40.9558083259517 58.2571968311834 36.9795961564828  
76.7806009547111 43.5544347011646 43.1826328292558 43.6753843488695  
48.272324215504 40.137818555383 45.3530683538086 36.6298807161755  
36.5474283500601

TNFRSF13C 51.9545473262296 50.9643363406241 50.1860191642359  
58.3475983630509 48.9627346956003 50.0748292497578 44.8643898647322  
57.445796273665 52.6561576154021 45.7911932481722 46.8954576545929  
52.6922486991742

TNFRSF14 974.658744477524 1430.73068989193 1453.77801653969  
1509.04753111016 624.51670158046 517.104607715151 444.618035487523  
806.827205415602 707.4124863603 1033.99699402259 1055.69506483576  
627.914461428624

TNFRSF17 37.3463875295726 70.6467150815052 60.5678281953819  
278.925589549838 35.5220586859301 38.3418933808844 35.9894133432376  
36.0306975524309 44.3440839686558 38.3092241935352 40.0766543123257  
32.554751989205

TNFRSF18 53.3967242431461 52.1062000766427 47.7052132264218  
62.0404348860702 46.1513019317765 41.159706131351 52.3242437351389  
42.7965563818112 67.7344875174123 43.8943892311541 41.862634402486  
39.5418280570561

TNFRSF19 66.7299966077909 48.0010635382918 50.8752434756771  
45.2606665758581 48.9627346956003 48.698412417388 64.7023558190673  
45.4216391637116 41.7627910693483 52.022479439889 49.4944276762428  
44.6484005362281

TNFRSF1A 622.964590694346 700.477686061791 1188.3486464341  
1191.01873119866 341.206585871289 1069.3975598703 688.612748336336  
647.868022835702 1147.19483787501 613.914396149629 931.401929277001  
641.103199748891

TNFRSF1B 57.7877627794725 64.0096843640535 55.2141529491512  
239.425856083354 69.0975200641705 73.0247140074919 55.2088411137193  
77.2834482217973 49.641159251878 53.1993028936883 48.2910530887214  
44.7401523707775

TNFRSF21 5636.93532853955 3478.67753301901 6089.64191751349  
617.808073077341 4916.82166008511 837.959914510114 3313.98659031004  
3761.48462220262 5018.90384962952 2921.68921750799 3690.00752647453  
3838.19449971537

TNFRSF25 121.354667375673 248.390047812338 223.316311787046  
119.101201684362 128.300809076274 66.7768390362438 132.799542377892

124.605379715077 101.738441694376 86.915098846441 74.466989900636  
66.7106881373359  
TNFRSF4 64.8367546135053 87.6178717341967 87.3085516526362  
153.364107550338 57.610757185978 51.334128582289 70.8835636550472  
49.9951674107458 44.3440839686558 45.0864985243943 47.6125796208753  
44.2527566343661  
TNFRSF6B 126.528654651607 110.238734353354 136.332339821167  
175.529493306927 61.954674965065 74.9006142438341 65.3694267397114  
101.065203693106 57.7096546601208 49.4728897891226 77.118454956956  
75.5799609581534  
TNFRSF8 40.9558083259517 43.0971787292711 41.924725226806  
48.856176220627 47.5002668436865 39.066284740632 35.8227939208521  
38.745552403895 43.0930293831497 38.6835649080278 37.5343260962758  
41.863927676552  
TNFRSF9 45.3872406432794 45.5842286511645 42.9104454767916  
62.1776700757427 44.9936360641969 38.3418933808844 45.8980298854198  
46.0633179231318 41.7627910693483 39.9948390976317 34.4716904283753  
41.863927676552  
TNFSF10 208.553134986809 206.814831223864 580.109585240053  
297.404152949522 63.25187762908 233.72882333861 318.768560912915  
112.805898501551 268.808342880355 249.855746700674 253.980053738171  
504.281506941044  
TNFSF11 37.7384958256497 46.338401428009 38.7745734037492  
41.6186264038868 43.6782245625941 41.4186558780356 38.9733632798532  
44.35072702911 44.9713479185144 37.5672792721124 39.1790517315259  
42.1915582886043  
TNFSF12 78.0522475574761 74.8071157013401 62.1893884200745  
151.601402122351 63.6254894053045 201.764909400617 66.979105340228  
67.8688083153991 51.4111372893136 122.504770242427 147.444007777385  
111.511934617893  
TNFSF12-TNFSF13 46.3390850717989 47.4740726032707 47.7737810047679  
54.1240583139871 51.0107745412152 57.013135787334 53.1884505015411  
40.7311497914871 51.3511088648386 49.8393069675192 46.1673159982664  
48.3648494350286  
TNFSF13 52.2236479204029 50.6229884142872 52.7005092555102  
109.851796671234 37.5556299264699 47.5733603903505 51.5229124652769  
44.5029690493211 41.5635499110307 40.2615278292875 46.3370338074996  
46.4136802014079  
TNFSF13B 127.60426512782 102.430234282331 77.7481370715949  
629.763102939071 56.7602749462766 188.156490868789 133.720493104769  
116.318299211619 56.4685270445642 71.4356132400211 51.3861659123096  
55.2886892579203  
TNFSF14 123.658435242998 72.2720428359203 86.3458707176254  
225.201522281399 71.7997882389171 85.0852996855365 112.220892096054  
213.380798420955 66.372364191975 150.011814577972 154.811704749343  
120.447568925399  
TNFSF15 118.870675731224 94.080489738662 93.36833450901  
167.724518368713 81.8837844326824 86.6246917308185 113.994256868581  
143.399636653204 81.4269715766354 180.902423012987 169.75692324104  
132.730723037077  
TNFSF18 37.55264801907 36.89524015739 36.9795961564828  
42.9358255168086 41.1868052124344 39.2985791324641 36.5352572191451  
38.1835938174625 37.0126425326534 38.4187686307607 34.3633615460307  
40.2669497398702

TNFSF4 98.6766028183598 54.0831732545644 51.5292723244077  
 58.4476706144086 49.5136713986758 54.7083331985678 51.3064929551674  
 50.857522488428 42.7150227340364 44.571915452417 47.7902961065936  
 44.8372404608604  
 TNFSF8 42.7150227340364 43.1805016690297 45.1569741609597  
 48.1662933382789 42.6022652963326 44.7804080899431 45.1017494688414  
 41.0381860307445 47.1744296124496 43.6033221838149 38.4689132737495  
 42.7782216342806  
 TNFSF9 131.380698046552 51.4413099192899 46.4569566520107  
 46.8954576545929 48.8381507187986 65.6914955077809 39.5496902678788  
 56.8094693588238 43.9450023643394 45.0155543555707 48.8744644207821  
 44.0451487108213  
 TNIK 41.7397731376692 48.2220547806679 43.3085358214154 53.0284011078097  
 43.4544762830742 45.8325181856483 47.2927436772465 47.2009420656854  
 40.6957787921451 42.8936990772838 45.9104478407175 50.379587451669  
 TNIP1 199.294913752704 175.099998331811 202.627009037401 421.279008280368  
 121.142787642824 226.553946570328 202.494545985006 161.283979969295  
 256.426184741007 210.005571009784 213.380798420955 175.652989203497  
 TNIP2 51.5888395924843 64.5347406608537 63.5107036952143 68.4261608261522  
 63.4753448572245 60.5803031036931 61.6544855697851 44.4031868028216  
 67.646351770712 63.5107036952143 59.1443775199516 65.6876778328592  
 TNIP3 48.8333989709933 43.683792219729 43.3085358214154 60.3481762331447  
 40.9950639693255 45.4882438975269 44.7255207589606 51.0724630072723  
 40.8970401536578 39.1621898366355 44.7114813656401 40.9683275553869  
 TNK1 45.1912496459517 38.5252456306656 40.4070046183108 37.651298468202  
 43.1252272136667 38.4330755397458 41.0381860307445 40.931294690669  
 44.8997235283254 45.4614234442527 51.1483696410762 41.4508241771315  
 TNK2 106.907589984092 225.918246061369 211.227389226633 123.444247442399  
 166.488589768213 83.3664149246525 122.15017220566 163.602952119927  
 113.716666562787 196.096147690942 167.319747725488 171.957278903005  
 TNKS 48.0201377454632 46.4385386401326 44.2405728317107 44.1483976313959  
 45.2556760873335 48.260931742163 46.0228732507872 43.5544347011646  
 50.0526763693329 40.3235655331796 40.6373400186325 43.2776458914333  
 TNKS1BP1 234.113622230498 210.919385184575 375.036941898486  
 111.522812019895 340.20879802231 203.808195515747 209.986313475002  
 178.624349589089 1459.69929955338 302.50850157207 376.289659542649  
 261.878099018309  
 TNKS2 35.7012997405508 44.6918600441328 50.0050760710506 37.651298468202  
 31.1733235029813 40.3357777530419 37.830876898596 36.43924066428  
 42.4540072551568 42.9866214102525 47.299647867533 35.1451084093692  
 TNMD 42.9104454767916 42.1607322031054 44.6032218589199 49.7350276169552  
 45.8051846088552 69.4214927857472 44.6032218589199 42.4580504587581  
 43.0930293831497 47.7180816682562 41.9083581529276 45.1735152121056  
 TNN 37.1485601150873 36.89524015739 38.8775560911841 43.5627649099623  
 35.0181575202066 40.8634043028528 34.9344532055397 37.5511560880902  
 40.7847110517594 45.1569741609597 37.2018803984555 42.6758568421347  
 TNNC1 48.8333989709933 116.967446594767 39.4710743516517 45.4634652319753  
 94.0777119695783 51.9421032049606 64.8367546135053 68.8058577447202  
 88.0055507173538 61.9882398986333 76.153346954349 74.0614295574729  
 TNNC2 39.9697332660833 41.4508241771315 40.6737160001291 37.8442841690502  
 40.148780650831 93.6236680572139 61.6544855697851 53.1052228246467  
 39.4762546236449 57.0581769379589 54.0374522273907 54.720204938924

|        |                  |                  |                  |                  |
|--------|------------------|------------------|------------------|------------------|
| TNNI1  | 43.1805016690297 | 35.7393138893354 | 34.5718473203083 | 37.5382094267692 |
|        | 40.3452320167286 | 34.9849896310235 | 37.7136011474903 | 42.6450179841129 |
|        | 39.6609238036815 | 36.5806287103157 | 33.6902293666089 | 36.7762265039864 |
| TNNI2  | 65.2001674269291 | 534.292112344761 | 1372.51401036753 | 60.9379216295576 |
|        | 64.3571664944642 | 46.3715909653832 | 55.4004611309636 | 48.5681478665796 |
|        | 143.399636653204 | 362.196116025799 | 294.813541173888 | 494.300858189605 |
| TNNI3  | 56.6951078698291 | 32.8881500803623 | 40.8420925848403 | 43.5627649099623 |
|        | 52.5645416722441 | 45.7300501624017 | 53.0277416531043 | 57.3286965007828 |
|        | 45.9227107476843 | 37.920964499903  | 39.8184668132023 | 41.4508241771315 |
| TNNI3K | 43.3638918705225 | 40.5400384479766 | 38.7745734037492 |                  |
|        | 35.314469458379  | 37.7576900881741 | 41.9543948167375 | 42.0605906240248 |
|        | 37.9837233601316 | 38.2215591930186 | 48.9826868640753 | 49.1868644496737 |
|        | 47.9566297250148 |                  |                  |                  |
| TNNT1  | 48.1125722136997 | 43.0227387991135 | 38.2280071951674 | 44.1483976313959 |
|        | 37.2567512265363 | 39.8455060654531 | 37.7136011474903 | 50.1833483241864 |
|        | 36.2733735494625 | 40.1179210534118 | 41.1638563416981 | 39.6352613956998 |
| TNNT2  | 46.3390850717989 | 45.3486182278177 | 49.9547657591437 | 44.550322123994  |
|        | 51.3511088648386 | 156.95090716929  | 44.7958122466628 | 46.1159021593282 |
|        | 40.8420925848403 | 76.1382217104599 | 46.7386599624801 | 67.3183506012892 |
| TNNT3  | 38.0648056183784 | 108.991044950132 | 120.771048750176 | 37.7146582037126 |
|        | 61.4800543360853 | 70.0567634568557 | 58.8993834673475 | 36.43924066428   |
|        | 54.0192060888782 | 366.998712124711 | 143.497887869284 | 292.065366215278 |
| TNP1   | 42.5193208629123 | 44.5884811528117 | 41.437237454134  | 42.8235313007746 |
|        | 47.4548471240051 | 44.5544727111028 | 39.1539892144371 | 43.844855336215  |
|        | 51.0062122023297 | 52.5522545249206 | 45.390192977585  | 43.3744503319109 |
| TNP2   | 37.0320432433314 | 40.716553247236  | 38.8775560911841 | 37.9875302985336 |
|        | 39.859345745831  | 42.2577689927563 | 44.4639405506967 | 42.9301944191913 |
|        | 40.4997186069494 | 37.4302011516587 | 46.5650556481721 | 40.9683275553869 |
| TNPO1  | 100.927111474879 | 105.828093778276 | 122.405413080836 | 149.832238573027 |
|        | 101.017461500409 | 134.085457101528 | 109.677588309718 | 130.498680522614 |
|        | 91.3840256860642 | 121.318996374586 | 153.153205095999 | 130.691004726616 |
| TNPO2  | 480.386431986343 | 518.074074000609 | 332.322497133752 | 238.893145911331 |
|        | 1014.6400720037  | 451.603052501528 | 473.102747358971 | 583.053232396803 |
|        | 353.463970335835 | 506.75912743556  | 456.467726693355 | 401.202348352506 |
| TNPO3  | 265.320447667174 | 217.743953847269 | 191.482692108417 | 198.623556176842 |
|        | 252.616382150668 | 232.740032714891 | 282.115786635657 | 370.027120412227 |
|        | 238.616000665585 | 357.44124276077  | 359.628703006773 | 192.216758313982 |
| TNR    | 42.9104454767916 | 38.5252456306656 | 45.2313723727673 | 41.0726336841311 |
|        | 41.2740822675592 | 46.1513019317765 | 42.629412460409  | 42.9301944191913 |
|        | 39.9444191873552 | 46.0119912782855 | 38.745552403895  | 40.8681871019812 |
| TNRC15 | 174.392758289374 | 155.6723334711   | 154.911548311992 |                  |
|        | 187.189412320761 | 200.698372627272 | 216.194306146777 | 140.01041112896  |
|        | 138.085451866914 | 169.96123729479  | 190.977045076469 | 205.789533350801 |
|        | 146.997252473598 |                  |                  |                  |
| TNRC18 | 48.2549905619119 | 45.4143854024453 | 46.614092935749  |                  |
|        | 45.7397504535169 | 46.8086806989607 | 48.3119523820103 | 49.8281348927244 |
|        | 43.6434576713809 | 47.9035532886869 | 46.8292269513767 | 41.2598458726002 |
|        | 42.0424641526302 |                  |                  |                  |
| TNRC4  | 37.9387791625384 | 38.2263227947189 | 44.3344900481112 | 38.4208429103799 |
|        | 37.4470183315826 | 38.8336427948187 | 40.7910160811527 | 46.8954576545929 |
|        | 39.1790517315259 | 41.1222709786153 | 37.8372168909583 | 42.7782216342806 |
| TNRC6A | 67.7831020218081 | 88.5274823465707 | 97.9004351588426 |                  |
|        | 86.6411972262415 | 102.372855708929 | 86.4498396868205 | 79.4658178984941 |

97.8309399470621 75.7991766454243 115.052948380817 137.658868649032  
 80.943990104641  
 TNRC6B 75.7502062965698 72.3297091475814 73.967017874248  
 97.9305595485282 64.7488184936482 74.2690269784394 61.1490925675473  
 84.2434917159728 64.2174369755376 107.610858427836 90.0682241853516  
 94.739351091808  
 TNRC6C 43.1267841876606 45.4757965005055 41.6977706798234  
 39.0156305603334 40.3021896270845 44.6024422254257 39.2010256871265  
 42.6450179841129 39.9777866059804 40.6022003765153 43.5710871617107  
 37.4059035942248  
 TNRC9 36.2496364442264 79.1039287828151 46.5650556481721 38.6414316877471  
 47.5647821785529 35.8227939208521 53.7423898357583 41.2551966132486  
 42.992884918158 42.1622837416589 40.8225507267584 45.8546719310325  
 TNS1 127.694844372277 54.8439819445945 52.5353664902258 137.335224748204  
 63.1443731864055 207.726011653345 44.0687697278114 65.4714272652857  
 69.4677195088043 130.812376632261 111.071209057746 122.914175013196  
 TNS3 856.790359133679 745.219025960188 679.810781641519 1093.04440713629  
 512.691506909762 506.173054520807 438.681666410245 352.019218177371  
 297.187417426993 898.668526777346 759.94822128584 617.808073077341  
 TNS4 41.3387790895716 54.2924642952939 77.4246856935596 46.8954576545929  
 55.6991707857987 43.4681646416585 51.4349390827895 42.157627240486  
 69.8899273527731 82.7229468743536 60.7516146716018 51.0647893605839  
 TNXA 38.5648843914189 37.7384958256497 42.7303139017786 45.4634652319753  
 43.5544347011646 53.3185097662527 40.9157352260901 35.0510338774593  
 41.4636047919453 44.6918600441328 47.7535797917441 45.9693232070002  
 TNXB 41.0043775553254 46.8954576545929 38.8417151851134 40.3180310664156  
 43.2484996523549 43.0860383229288 41.9918605927928 41.9315419791594  
 41.9635525160083 44.2580151149956 41.0808257270221 43.6434576713809  
 TOB1 153.028210322286 1039.06999658544 677.855726232203 208.553134986809  
 714.990611155096 294.908371819124 454.185408362583 586.735744054398  
 631.110081413363 877.673009984357 1000.65752290829 344.985739524681  
 TOB2 69.8712342353417 72.5397346298724 72.0243286940589 71.3932787152381  
 49.9493230064613 62.5542376788358 65.1041577962151 105.1770711426  
 73.6965494979349 92.6888475289584 77.7714622826402 82.0124493733776  
 TOE1 48.1125722136997 57.8876850634922 53.5698357689852 45.1944222548351  
 50.8875036861067 49.5424425850549 49.540449125788 49.5185112777773  
 56.7991853808475 52.2256177934134 56.233217375698 50.1579724208315  
 TOLLIP 118.614027673431 273.231509963261 274.493399403322  
 125.333208461509 125.27802197261 131.659314490437 125.891602778425  
 103.366147685418 201.163076338483 480.260282672252 398.139730642919  
 289.716911324484  
 TOM1 214.484877083166 92.3388129097482 120.401643722713 386.00975855841  
 81.0259717888094 121.336830564295 96.8490167966217 113.82565808481  
 99.864496342189 110.626479311082 130.953274536639 92.5903918620825  
 TOM1L1 51.6558970571712 70.7702047405718 61.356483470053  
 42.0102671859606 58.9875400392427 59.0686629877982 89.2913927776683  
 61.3077641493507 81.2850357499192 51.0055825931636 47.0940613507321  
 58.5478485621444  
 TOM1L2 49.3854238365325 61.5824518349507 60.3597249466312  
 49.239733414453 63.5549258538503 46.519318502363 60.7051911023888  
 70.9179240997848 53.6057809398787 54.7827221235949 56.7765567227989  
 52.0359304386476  
 TOMM20 285.97627172608 523.863193910096 637.824136761292  
 249.246628143531 629.301646370726 556.092573451208 358.63899765183

|         |                  |                  |                  |                  |
|---------|------------------|------------------|------------------|------------------|
|         | 266.687281047486 | 360.15483218921  | 311.1022748407   | 383.705244574204 |
|         | 554.163106145921 |                  |                  |                  |
| TOMM22  | 207.710354513208 | 221.450737998571 | 205.789533350801 |                  |
|         | 176.816741656659 | 224.749607192071 | 224.635749257133 | 261.195021649777 |
|         | 253.910836731947 | 250.959527806799 | 276.029709051798 | 211.019451518444 |
|         | 262.327538467461 |                  |                  |                  |
| TOMM34  | 239.229093340475 | 509.879213331349 | 239.385229462309 |                  |
|         | 147.285007921741 | 318.302018651677 | 150.009352890706 | 689.228901128857 |
|         | 1062.93431683428 | 383.371300272181 | 522.811631783729 | 587.385368995676 |
|         | 339.313853828248 |                  |                  |                  |
| TOMM40  | 753.491584605447 | 1000.65752290829 | 659.666977039793 |                  |
|         | 553.517839467557 | 2771.14077845128 | 651.969296681551 | 1545.76489731307 |
|         | 1005.45493369789 | 1513.74711975248 | 536.290060852815 | 696.113365766871 |
|         | 440.421077161585 |                  |                  |                  |
| TOMM40L | 45.7700386532539 | 51.9421032049606 | 61.2679059816982 |                  |
|         | 64.0903425729408 | 53.4109882045447 | 55.1547682957918 | 63.7721358300879 |
|         | 68.0751111916102 | 93.7090094630558 | 58.9469577494939 | 56.1379957867124 |
|         | 53.9431600945419 |                  |                  |                  |
| TOMM5   | 175.441884261362 | 148.71330612986  | 104.037949992458 | 156.833474582387 |
|         | 222.696947669812 | 188.30834153268  | 216.606583011866 | 112.021971795593 |
|         | 177.067668324062 | 94.1575209300592 | 92.6230008876347 | 165.573693886454 |
| TOMM7   | 4048.33132153903 | 2164.51925341969 | 2588.47871581066 | 2865.25344854768 |
|         | 3234.36469403715 | 5112.4354472796  | 1963.91365010531 | 4752.94498024732 |
|         | 3217.83121827744 | 5696.39636379286 | 5525.13078364599 | 4916.82166008511 |
| TOMM70A | 425.304961783517 | 429.983084929605 | 429.329962597147 |                  |
|         | 320.504100222566 | 748.372940917543 | 743.463635670141 | 578.15246893623  |
|         | 604.951648398924 | 531.529022249333 | 743.463635670141 | 755.106456358949 |
|         | 521.546082699431 |                  |                  |                  |
| TOP1    | 47.1962846565261 | 45.6271294527191 | 40.0557788909923 | 41.0219290963778 |
|         | 41.9842695818285 | 42.6575535390785 | 41.8751578329365 | 39.8016018354453 |
|         | 47.4699236780425 | 39.0648733099061 | 44.3440839686558 | 41.3948836161924 |
| TOP1MT  | 170.720099897973 | 165.061411701316 | 100.52186805932  |                  |
|         | 77.6174893940285 | 150.262748333939 | 100.927111474879 | 88.3335649692467 |
|         | 110.09868737254  | 169.459466601559 | 134.239606718101 | 142.812241748319 |
|         | 139.022985518859 |                  |                  |                  |
| TOP1P1  | 41.3387790895716 | 42.1607322031054 | 39.3709357615493 |                  |
|         | 38.5707420487455 | 39.528971131769  | 35.8227939208521 | 35.1638572047496 |
|         | 35.4267286537181 | 36.4476883897928 | 35.6208308220005 | 35.7953070087288 |
|         | 37.2291018661279 |                  |                  |                  |
| TOP1P2  | 60.6441065119394 | 56.463481075522  | 59.5444359507702 |                  |
|         | 72.89602312859   | 59.8102324370568 | 49.8472708021525 | 71.9474405671289 |
|         | 82.4414994502172 | 69.4677195088043 | 57.2813205536176 | 57.2008272301399 |
|         | 69.8505620106065 |                  |                  |                  |
| TOP2A   | 243.640796499438 | 602.441843384617 | 287.883101814563 | 118.911578268073 |
|         | 818.927157206447 | 152.47776741936  | 1270.49749036491 | 434.223722811041 |
|         | 959.549658414082 | 56.1912096308988 | 46.8954576545929 | 67.0331844416938 |
| TOP2B   | 464.99944459917  | 1582.45600339543 | 1214.73798692268 | 501.148339791372 |
|         | 1792.42490815074 | 905.76958446454  | 1707.92349760322 | 534.292112344761 |
|         | 1618.92099084622 | 837.959914510114 | 1046.42391243532 | 949.923102632043 |
| TOP3A   | 67.5361056077111 | 77.5737637002275 | 84.7222416138393 | 107.799236230743 |
|         | 102.77259665192  | 66.295597720304  | 120.465621774337 | 84.1639779987105 |
|         | 57.4777075615651 | 75.0665411373616 | 98.8114094374455 | 77.8039806950172 |

TOP3B 117.20232751191 153.139323479953 163.877163712385 110.112236384679  
160.566474370004 81.6949047529395 173.819948756127 100.114114765033  
114.829148878375 82.1062834830477 91.8414653633828 81.4165540307337  
TOPBP1 128.717988447086 108.39424630351 98.9657264176664  
107.637618676176 150.011814577972 76.5888466260562 139.356696282462  
158.449570606242 119.512426152446 85.5439309325541 77.0226403968683  
88.5638310461364  
TOPORS 61.5112659162073 63.0670482657086 50.6526511991732  
71.9062462001972 57.2647835956181 64.7905331739366 61.7572675712557  
54.6067620335514 62.5542376788358 54.8346842758068 57.6610554457343  
60.166504843984  
TOR1A 147.602298697211 121.37214545992 79.3066495980045 101.560929859785  
91.1057573288203 131.808634405319 118.899737794318 95.2915739972533  
92.8206287414481 98.4084364053686 111.924999671217 131.238796973323  
TOR1AIP1 270.202959012185 371.393488010768 509.879213331349  
416.323909993454 247.007210336963 666.265306908449 228.254228465645  
139.847976281228 271.393858310441 355.00914527669 378.358853591082  
385.064309855006  
TOR1AIP2 56.4553747079294 58.8936382809165 62.6532574724345  
61.2213001749372 92.7836745985234 55.5034649924369 54.6414321010929  
52.0503062610092 63.7046039657949 53.8716214229685 51.6869155634183  
64.2164483533411  
TOR1B 135.567012693522 144.412165495719 119.905655993777 183.028254350275  
114.972374827795 123.493308132159 134.713725350463 94.4618437533343  
110.379403044901 102.607924735378 113.051477801522 113.491158368594  
TOR2A 61.2130609867477 51.6869155634183 50.5089777244781 49.3654837541353  
52.6922486991742 54.7083331985678 51.7714254834195 53.838484549134  
63.3694113050568 46.5650556481721 52.022479439889 47.2131144508464  
TOR3A 164.722166245312 142.365344693239 232.147792636393 192.003788858976  
191.979759198021 160.459991480576 172.015856827154 221.195872577098  
267.29148042787 115.853867920678 153.812414753676 166.652850759559  
TOX 41.0608773166058 40.716553247236 46.1653991089885 42.5664883002833  
36.5393857306744 50.8533737532786 40.1235656101329 46.9986083378817  
39.3750969348308 43.0919221375514 49.1868644496737 42.0424641526302  
TOX3 38.8561375693335 299.094486437911 102.443884864631 39.7411455670172  
111.256949641793 55.401776072578 112.113501370522 73.4820932957859  
88.7605288058249 50.4234835272833 58.4816190076338 72.8306652548968  
TOX4 52.310270746917 48.0296332183129 43.401782064778 47.9915414951747  
44.3557408297309 53.6858208094027 49.8281348927244 50.1833483241864  
48.8067321016961 57.8585041080995 54.4825201506931 61.0025829061063  
TP53 46.6348258763289 184.536327776767 98.9657264176664 72.0694688774804  
163.028918580618 66.8632294055679 45.4799270968969 70.2541961995753  
85.5711312226989 74.6847594297153 74.280612516205 66.6118713143653  
TP53AP1 60.8357760968871 123.674164545425 183.431582521592  
61.0845101400379 84.0996028277101 86.503774181307 100.891869710611  
90.0223113095186 180.475056805817 146.534713287435 94.1762630490912  
157.979422616649  
TP53BP1 199.54796711653 180.255771684507 127.437627356956  
129.951091959262 208.897032780128 157.856158440506 162.486448421519  
206.857208722995 175.28322146764 112.02980664709 162.569762535436  
148.467977704907  
TP53BP2 146.87603018486 113.767996184128 136.875335055866  
234.495626550751 135.567012693522 118.745729915256 173.476817564711

155.564141715819 145.72829095462 116.402015950361 121.281573820819  
113.078239841596  
TP53I11 64.8367546135053 56.6617674371349 53.1491634301682  
45.3882138838137 45.4751076037511 47.2505395290129 42.3194600586894  
54.9919060580109 65.7587943905649 48.4890615340603 53.3408430956148  
55.7067742610401  
TP53I13 179.267796142741 211.625447303889 182.80711310964  
123.978615472736 171.073367662623 120.392561825049 373.914455300185  
168.426372075344 210.166909564076 108.39424630351 136.736085245679  
116.17375251898  
TP53I3 100.489477730896 137.10896135739 119.634256037186  
89.9284109077375 83.3322777515023 80.4601303882402 190.099949303905  
221.808325312905 113.873117749074 87.4850071876743 96.2248868829355  
64.6008211424158  
TP53INP1 103.179198287911 163.788056447509 99.1952492360239  
139.731620245421 106.691530592115 82.1974756449763 59.2480093795476  
85.0308877626746 88.6717761948382 138.923143963742 100.300863150751  
75.2150154717572  
TP53INP2 172.192366002756 127.82585786161 133.163926420863  
233.710655978992 79.6516904169771 267.565744773928 125.30588698166  
197.776069056927 132.473918053428 217.617227445082 177.912351477808  
135.398193235699  
TP53RK 137.294289316915 145.335751135441 96.317642888143  
89.4504034432321 113.298540312696 101.46584765758 120.231435193839  
92.4953883194488 125.091427687365 115.98265270452 120.418406532204  
103.75895351937  
TP53TG3 41.3708420203838 44.1519466943185 40.8420925848403  
42.9358255168086 41.5421429082231 42.1095407186921 43.4544762830742  
56.4779645313958 43.7630587657205 57.6336931026499 43.2649781354792  
47.8360317478571  
TP53TG5 44.7044140979108 41.7337506166619 36.5474283500601  
37.0732977341185 45.4751076037511 44.55447271111028 38.6243997507646  
38.6454098044474 38.8271346375425 39.7835513496873 40.547835538778  
41.863927676552  
TP73 45.2875173643252 37.920964499903 38.1421709520616 51.5913529948887  
46.7508829977587 37.2686490268265 40.9157352260901 41.3506832276112  
40.6957787921451 38.6454098044474 42.6366765186182 45.2783024981315  
TP73L 54.5358897781765 704.15545332905 732.454837219705 44.6905691366696  
735.083155673644 140.744765497063 326.250872625748 73.746472097049  
1012.0373748933 985.868043346593 643.491217668415 834.14766574977  
TPCN1 89.9580440276828 54.6089451252049 79.6675791471526 84.0899854321388  
57.6791750431251 53.8461734834857 77.0003455479124 55.1109784383525  
48.1174861108648 88.0664425843955 73.4853298204744 70.6903168772326  
TPCN2 76.6868184563568 98.0023132593711 69.9179689232341 112.000099082544  
136.947616119439 82.5956705829173 108.447037611705 137.976238593619  
76.8864157610323 85.1188125003595 103.826044798469 61.0025829061063  
TPD52 79.7992359774565 92.3659612653822 60.1874689914535 71.3527183280827  
46.4775637378703 54.8265655909623 69.0530953932111 52.2355943901685  
73.4122412764173 107.906865732219 73.9701365395921 90.5732028806631  
TPD52L1 73.9456720099807 90.5216273844682 115.075487821396  
51.7739270955254 72.3523300799007 420.761600667193 141.055218279065  
58.9081750508316 141.261334415286 93.6035786561544 115.241218638779  
146.763378089693



|         |                  |                  |                  |                  |
|---------|------------------|------------------|------------------|------------------|
| TPD52L2 | 543.268021785502 | 362.853023741815 | 305.476842356935 |                  |
|         | 655.389317052689 | 422.356080534477 | 451.820169649522 | 560.954913956997 |
|         | 527.686970237622 | 475.008345432596 | 447.248719481853 | 485.310097523194 |
|         | 370.027120412227 |                  |                  |                  |
| TPD52L3 | 41.9407041937973 | 38.4330755397458 | 39.991353369336  |                  |
|         | 44.3557408297309 | 44.9936360641969 | 39.4953494583071 | 43.3744503319109 |
|         | 40.1474543172332 | 43.3165374444543 | 41.9069736908705 | 43.8923243437146 |
|         | 43.3744503319109 |                  |                  |                  |
| TPH1    | 40.148780650831  | 39.5050383901884 | 43.401782064778  | 50.8567345921473 |
|         | 47.8075998240396 | 47.4699236780425 | 46.7100796279384 | 44.4031868028216 |
|         | 45.5779686360641 | 38.745552403895  | 43.1931731665131 | 38.8495095797881 |
| TPH2    | 41.2424637338424 | 39.3999056968598 | 35.0970060242246 | 41.1886975241176 |
|         | 42.1650127805175 | 37.7000400506818 | 41.1507980856436 | 44.5029690493211 |
|         | 47.798305839406  | 41.8613406887824 | 39.2542963855807 | 44.1452943804044 |
| TPI1    | 3124.84336032646 | 2036.72286752819 | 2611.32405374107 | 1835.21901524331 |
|         | 1839.09068171097 | 1493.20520979227 | 3546.97585966225 | 2054.64068255575 |
|         | 5387.08056045279 | 1539.35554229258 | 1642.75555340648 | 1991.4199819544  |
| TPK1    | 55.7979038616211 | 116.374125502825 | 72.1154333023225 | 129.785929766258 |
|         | 62.046151104685  | 85.5362566454799 | 64.1607001437806 | 46.8954576545929 |
|         | 119.634256037186 | 79.262977183608  | 71.5616860050001 | 74.6474346708746 |
| TPM1    | 444.169882251299 | 240.431987635418 | 157.356512456687 | 190.099949303905 |
|         | 197.325473090277 | 3502.80810319252 | 227.535855856645 | 200.019523376661 |
|         | 104.936456561176 | 1027.59400018637 | 1078.86166154061 | 2365.73772015255 |
| TPM2    | 2581.34849558524 | 648.885062676884 | 638.848775860866 | 1167.25317435052 |
|         | 1194.10154988793 | 9326.9018948838  | 266.381531918483 | 1068.10627239579 |
|         | 207.928770428477 | 7980.71309230447 | 7393.77508374057 | 8630.67463560037 |
| TPM3    | 111.304424389891 | 118.862494537893 | 138.655669174533 | 135.819510815042 |
|         | 123.368987753537 | 132.555169949054 | 140.866324039667 | 153.12544312212  |
|         | 92.5903918620825 | 54.8219885610674 | 55.2088411137193 | 87.3429006429216 |
| TPM4    | 210.096514889445 | 229.035497774884 | 159.949298350852 | 230.975122271137 |
|         | 147.093338225478 | 188.120766710975 | 125.446628066221 | 108.025082988807 |
|         | 120.995347517172 | 101.463033319045 | 119.691133736693 | 227.686495419561 |
| TPMT    | 261.421333472097 | 220.85458646522  | 184.377148097206 | 204.251854342995 |
|         | 383.705244574204 | 194.985223342082 | 430.283061862756 | 255.946758662074 |
|         | 260.698359835873 | 189.47090669378  | 216.821078573868 | 151.641746442323 |
| TPO     | 39.5676051939342 | 37.958111840848  | 39.044540595942  | 36.1102444571522 |
|         | 37.10170285405   | 49.7149784386993 | 38.2933870238743 | 37.0390589468421 |
|         | 34.1294694030979 | 41.0057887014368 | 41.5421429082231 | 42.0424641526302 |
| TPP1    | 402.886581458688 | 265.176790020229 | 530.853153115366 | 841.850722284484 |
|         | 317.186419919708 | 370.027120412227 | 200.002687565519 | 293.463475974405 |
|         | 288.508774004052 | 319.659366973269 | 263.765914589758 | 280.490447179545 |
| TPP2    | 62.9952378379206 | 66.9218519793499 | 57.165971310746  | 66.8475050031365 |
|         | 56.5094373275922 | 62.9688525319822 | 70.8088594316677 | 61.3077641493507 |
|         | 53.41889323316   | 51.6778366958973 | 56.0794100106654 | 56.0477607422828 |
| TPPP    | 40.2543341073001 | 41.9894412416874 | 33.8558232866797 | 42.0102671859606 |
|         | 45.1137938810047 | 67.6817814091697 | 47.4439407315335 | 38.8495095797881 |
|         | 41.6616444147804 | 55.9283039581662 | 49.6706535876636 | 42.6758568421347 |
| TPPP2   | 37.4554876386402 | 40.716553247236  | 36.4564050256915 | 38.0958223740111 |
|         | 40.3452320167286 | 39.6251842352088 | 36.9355798143571 | 39.6474008369935 |
|         | 37.5469247328848 | 38.745552403895  | 46.2560238004757 | 48.6795178347248 |
| TPPP3   | 47.7779356299965 | 52.3579564953125 | 53.1884505015411 | 44.3440839686558 |
|         | 43.2484996523549 | 101.177486898065 | 43.4544762830742 | 62.9553576299033 |
|         | 41.7627910693483 | 56.5379973844443 | 48.2050207071554 | 61.7502624458447 |

|        |                  |                  |                  |                  |
|--------|------------------|------------------|------------------|------------------|
| TPR    | 344.061882582662 | 145.883224917856 | 200.41782363596  | 240.934550408797 |
|        | 204.659954879641 | 174.752830194939 | 245.540041661003 | 196.17328008185  |
|        | 194.502731496189 | 202.128650032341 | 191.454637685756 | 181.772001042799 |
| TPRG1  | 45.8108990837624 | 41.8073910693411 | 43.8495248991589 | 45.334106390212  |
|        | 41.5668884168669 | 45.3882138838137 | 40.4359177791566 | 43.9366081640576 |
|        | 41.1742244762318 | 44.2580151149956 | 43.7585538437696 | 42.8864415494484 |
| TPRG1L | 362.724027984972 | 569.511773053233 | 540.170798097714 |                  |
|        | 304.133852957499 | 565.411298018845 | 662.848386826617 | 314.819739055632 |
|        | 511.792908607692 | 271.529471399941 | 802.650020720921 | 845.41973083225  |
|        | 602.047768767953 |                  |                  |                  |
| TPRKB  | 77.6056319020116 | 59.135659721231  | 71.5062409407193 | 55.5276281380084 |
|        | 78.1275793755619 | 69.1523164481201 | 68.2708120569221 | 91.0952554578659 |
|        | 76.3790849853724 | 48.4285440574489 | 51.8812208789107 | 82.6428395563033 |
| TPRX1  | 39.5676051939342 | 38.7344853699576 | 37.1643693306382 | 38.6414316877471 |
|        | 38.4540849632254 | 41.0582900711341 | 38.4005795891396 | 34.806104801006  |
|        | 42.992884918158  | 36.6893251782922 | 35.2339574411711 | 38.6454098044474 |
| TPRXL  | 49.1147639552724 | 41.2214779019897 | 44.1070537445005 | 42.4061338151892 |
|        | 39.6535880152834 | 38.4741160538511 | 38.4456289125816 | 43.9604529016594 |
|        | 73.6965494979349 | 57.1095070128372 | 48.6494451061637 | 53.9431600945419 |
| TPSAB1 | 624.51670158046  | 200.566335168667 | 152.159270481787 |                  |
|        | 337.736535374405 | 43.3896803974186 | 3786.90274075023 | 54.8074655158941 |
|        | 169.061093538895 | 44.1211971585961 | 812.386878774445 | 891.080174768895 |
|        | 412.694325761831 |                  |                  |                  |
| TPSD1  | 44.8914371498528 | 41.554942319225  | 37.1643693306382 | 40.9607305725196 |
|        | 40.9950639693255 | 34.2773859804062 | 39.5496902678788 | 42.5435283762933 |
|        | 45.0997987980157 | 39.2623423164488 | 38.745552403895  | 40.2669497398702 |
| TPSG1  | 39.9697332660833 | 41.554942319225  | 43.7630587657205 | 43.1847628331565 |
|        | 43.2484996523549 | 53.565717255469  | 47.7390230243778 | 42.8482181313226 |
|        | 38.7298222155532 | 50.5252048155459 | 45.5707650534259 | 44.4475838947656 |
| TPST1  | 254.066741436612 | 161.48562926756  | 131.717764850211 | 233.850715388018 |
|        | 192.171116215791 | 586.281182112872 | 78.8250642061439 | 176.492987902471 |
|        | 136.451598654243 | 238.120731107691 | 197.569816397993 | 175.165302282522 |
| TPST2  | 360.342857415756 | 233.326886009799 | 284.013140015092 | 427.818758455214 |
|        | 212.530138323284 | 230.879083362388 | 256.026804821501 | 150.829277770546 |
|        | 221.450737998571 | 285.56460901579  | 293.217518524507 | 300.057362423939 |
| TPT1   | 12770.8282719641 | 10996.2779403491 | 13230.9863405074 | 14226.3743910711 |
|        | 8937.3846214861  | 12125.3293116195 | 9709.60940482862 | 8545.48005557056 |
|        | 9709.60940482862 | 9326.9018948838  | 10351.5373412096 | 12456.731302703  |
| TPTE   | 36.6062356000449 | 42.3550738181144 | 35.9305494063137 | 43.1847628331565 |
|        | 41.1507980856436 | 39.3841861812262 | 40.4359177791566 | 39.1128725343972 |
|        | 38.2215591930186 | 37.7598032934773 | 42.1537476443423 | 40.716553247236  |
| TPTE2  | 44.2350046179299 | 36.6382269697016 | 39.243700710881  | 44.622459983127  |
|        | 40.3452320167286 | 39.9697332660833 | 40.1235656101329 | 41.4702213972048 |
|        | 38.5583217392131 | 41.9666541498638 | 43.4505047042339 | 38.2013340576059 |
| TPX2   | 105.308648028552 | 122.0305509548   | 88.2959958615748 | 56.4578213622965 |
|        | 265.860397918913 | 59.2643906275025 | 217.39432336811  | 88.0827215704624 |
|        | 150.789911774534 | 42.2614524730856 | 42.8263096141654 | 46.1592873342534 |
| TR2IT1 | 38.6454098044474 | 40.2493681589104 | 38.5442780220289 |                  |
|        | 40.646702696033  | 46.4732328055735 | 42.4155142987678 | 40.6750540874299 |
|        | 34.6551521398176 | 42.7150227340364 | 43.2438688757519 | 37.8372168909583 |
|        | 41.4508241771315 |                  |                  |                  |
| TRA1P2 | 55.0078788655089 | 66.7256057011273 | 54.6051538001037 |                  |
|        | 74.6159297822533 | 73.6965494979349 | 71.0645521832919 | 64.3669451425581 |

|          |                  |                  |                  |                  |
|----------|------------------|------------------|------------------|------------------|
|          | 44.9977782988116 | 85.0162042963215 | 55.3153799233744 | 49.3901004211918 |
|          | 64.7963220317334 |                  |                  |                  |
| TRA2A    | 147.371811804618 | 200.986069552443 | 202.128650032341 | 196.844428284247 |
|          | 221.598637828404 | 247.843927763772 | 179.241252961119 | 264.071486075874 |
|          | 150.572774995368 | 145.819204020818 | 227.170944398338 | 193.468773556057 |
| TRABD    | 555.044139654886 | 1317.29255644089 | 1050.05355467301 | 781.923984640049 |
|          | 1842.15643221012 | 429.453114391562 | 843.333981146512 | 909.843512894628 |
|          | 1051.58050264114 | 1167.25317435052 | 1047.33749100342 | 970.092441721494 |
| TRADD    | 104.886608171525 | 111.626292905866 | 253.462941029119 | 85.4875375805171 |
|          | 63.0842071602791 | 89.5597629049747 | 94.2762661604561 | 85.8059456975413 |
|          | 116.094881058504 | 82.0149542477384 | 79.262977183608  | 79.764884237881  |
| TRAF1    | 48.3583786497948 | 55.3477556906605 | 49.0558421082416 | 77.0185859105846 |
|          | 49.7235523248653 | 48.8744644207821 | 51.2318935933116 | 58.1521928484154 |
|          | 49.9162522057712 | 54.2407836381501 | 48.3570240922825 | 52.1186591838715 |
| TRAF2    | 124.37984507038  | 78.806097512943  | 60.6567691532561 | 87.114638423256  |
|          | 79.7808217577226 | 69.2685201884906 | 148.570371099987 | 84.7642634532073 |
|          | 96.9051967257119 | 98.2843999216669 | 100.774098314706 | 63.6966761077037 |
| TRAF3    | 53.1309801459151 | 54.2445399731644 | 65.1185966859561 | 116.852483297949 |
|          | 57.5685357492202 | 61.7091923488929 | 66.1940959364976 | 66.211494935811  |
|          | 71.5327770882433 | 58.115198353247  | 56.3106156221316 | 59.9326265577462 |
| TRAF3IP1 | 64.4025314000631 | 61.8492980174846 | 61.4416707689893 |                  |
|          | 60.5390917151449 | 59.2643906275025 | 75.6382797289563 | 60.1705241170421 |
|          | 70.7805103907761 | 77.0244607682203 | 54.8346842758068 | 56.3106156221316 |
|          | 62.9364422691302 |                  |                  |                  |
| TRAF3IP2 | 169.391313189738 | 205.187554095744 | 199.858233616116 |                  |
|          | 129.697400781396 | 88.6838633595745 | 124.051109959228 | 134.300169542594 |
|          | 245.004434952963 | 124.965915196815 | 124.890309370032 | 130.261747462753 |
|          | 172.039289618908 |                  |                  |                  |
| TRAF3IP3 | 54.6235981131919 | 72.4325984501758 | 63.2475738480323 |                  |
|          | 171.623830248512 | 41.3755760434934 | 58.7404123614695 | 49.8281348927244 |
|          | 46.8954576545929 | 34.4716904283753 | 48.0211752672327 | 50.5188367542048 |
|          | 43.9541718254769 |                  |                  |                  |
| TRAF4    | 63.1291723738553 | 76.889690218685  | 66.288032400574  | 37.1894304543751 |
|          | 72.9154861179393 | 44.5544727111028 | 73.8313212063649 | 104.900627862215 |
|          | 91.7761668960824 | 63.3872214856708 | 57.8991270166934 | 50.4847465816184 |
| TRAF5    | 54.6051538001037 | 54.8979897528792 | 69.3468840908665 | 56.5402453093703 |
|          | 48.20333858352   | 56.446325212547  | 49.4659732808421 | 59.5177293266879 |
|          | 55.4452315601595 | 73.9376772899278 | 62.4077024344427 | 67.2437599548936 |
| TRAF6    | 54.1283224883192 | 60.0219418084008 | 60.8942621888353 | 67.2968280876013 |
|          | 52.6922486991742 | 58.0095518210499 | 51.7714254834195 | 72.207833811212  |
|          | 55.6215767260208 | 58.4435847520801 | 57.6684494624163 | 56.8534370691413 |
| TRAF7    | 61.1022920882065 | 90.2227706363325 | 80.4601303882402 | 57.2856683017619 |
|          | 104.657817552182 | 67.6169355376864 | 62.3556396662215 | 60.3366440660852 |
|          | 86.9032093551446 | 66.1406655359732 | 61.9976238937207 | 58.0722340887264 |
| TRAFD1   | 189.47090669378  | 186.195424728755 | 161.109600577001 |                  |
|          | 204.370291548631 | 137.424708183613 | 152.76005226611  | 184.989940464859 |
|          | 162.993316022946 | 272.315378390681 | 181.2179249806   | 184.218705402964 |
|          | 148.781721594419 |                  |                  |                  |
| TRAIIP   | 47.0940613507321 | 46.9919960628953 | 37.2838080935695 | 38.8495095797881 |
|          | 50.3713170502557 | 42.9695585740813 | 50.6774883370457 | 47.9942520395434 |
|          | 46.581796165231  | 48.1392888470269 | 46.6442692119997 | 44.9070250604284 |
| TRAK1    | 90.407200101342  | 719.815240381415 | 396.167219131922 | 140.076084766156 |
|          | 564.468049419762 | 171.722423740869 | 547.729200972776 | 430.618167106529 |
|          | 310.706520144173 | 561.855286945959 | 583.690350347288 | 494.733185937057 |

TRAK2 335.167786298149 116.094881058504 147.137598111239 329.201360653451  
 111.669813610213 605.338871441599 152.72007888133 227.361044585582  
 196.267504470029 387.311743342483 258.913621521866 370.64147085217  
 TRAM1 1649.78627644882 2435.70120719503 1656.16581692717 2650.09507972593  
 1501.67042548971 1102.03940742413 1524.01520893763 1020.75813028358  
 1416.47763911039 1176.37732422904 977.776395810338 1453.77801653969  
 TRAM1L1 38.5007204246293 33.8237407699472 45.5883690965192  
 34.7266486944713 40.148780650831 37.1317006162938 35.4623691645629  
 35.4526946152955 37.1820543575123 46.441301934328 41.0808257270221  
 35.2448979801094  
 TRAM2 215.800662077432 117.474987556447 108.196445499586 151.601402122351  
 99.0647786948132 135.644934816665 65.0031119608637 83.1702007661831  
 74.9179396623258 102.840494180617 105.052418151358 115.942945263238  
 TRAP1 128.374733248762 341.397811775105 350.584135047249 127.789065386943  
 461.607803139448 245.585026913915 344.578407722941 99.9057667432209  
 328.176884082116 184.269633116351 193.043344611355 182.685579297058  
 TRAPPC1 179.605537867711 341.142651038591 624.51670158046  
 351.365159217524 280.446302631438 235.544416908354 432.807626784742  
 348.165210494253 247.356027979377 466.935292808402 423.608694638779  
 359.889643461047  
 TRAPPC2 65.1185966859561 85.8362180324381 84.8276953169119  
 60.3977304934451 78.258486366912 88.1886407127943 79.3066495980045  
 70.6568303458436 105.247736284747 82.0149542477384 86.0761288363404  
 83.5646728968172  
 TRAPPC2L 600.34379987143 500.168833003599 696.946621824188  
 602.047768767953 430.868309653765 563.065549077627 772.368030410394  
 749.49934348018 342.923254301057 685.386956092142 742.726253630865  
 456.874884453965  
 TRAPPC3 535.313561995599 321.359569119182 333.731080636948  
 403.428042132639 534.460534486887 433.767439244344 398.139730642919  
 424.539111965342 453.260719561292 642.946369683508 473.223156200183  
 500.313640131475  
 TRAPPC4 401.956364010068 298.670959394883 446.162602155964  
 327.680540922377 370.41288705812 452.883337614277 291.596692248591  
 498.284928805673 324.877187846959 268.872239581507 290.535354193244  
 425.174170332175  
 TRAPPC5 527.439095170064 339.854688605186 452.883337614277  
 661.269882993465 578.311131274653 411.981987305512 530.996217072759  
 537.471287449696 674.270050283701 425.522158941437 383.00934152588  
 332.137622104526  
 TRAPPC6A 93.9756797434207 59.8102324370568 79.1649337367773  
 57.4595416719581 102.372855708929 63.1091746640396 137.335224748204  
 175.28322146764 105.247736284747 100.499763255098 94.2678678253657  
 76.2533853403813  
 TRAPPC6B 60.5060523570927 49.5810174435089 55.2141529491512  
 55.1531662914834 50.5868854091439 62.615193215859 51.0572809855463  
 65.7753115172195 60.0141692793298 67.6625413926778 68.2708120569221  
 65.524821699432  
 TRAPPC9 156.242688079359 230.486681581762 141.784776736918  
 107.799236230743 126.620595729562 150.801729138762 160.360785581153  
 142.124053129543 192.41551362197 163.860910729725 200.019523376661  
 134.407474121421

TRAT1 46.3884811643547 47.1332119496722 42.785429206422 62.0789181257889  
41.8806343997257 47.3791873993182 42.8684958525042 43.7396619462033  
40.8420925848403 43.0919221375514 44.7926323492519 41.7575097298927  
TRDML1 45.4799270968969 43.7644428186265 44.0451487108213  
47.481302504066 40.1978874031072 45.889677919201 40.3302268293707  
44.9977782988116 46.6491671626143 44.3303034026662 46.0095710163378  
48.1125722136997  
TRDN 46.6348258763289 39.0894172982439 40.6737160001291 42.4580504587581  
37.1565984182084 43.3785777889265 40.2154497375715 48.87875862356  
40.8970401536578 37.4302011516587 39.9070785037411 39.7411455670172  
TREH 43.6706764143908 40.148780650831 39.9101908547397 34.6468794865286  
45.6895223823001 34.9849896310235 42.1607322031054 42.5435283762933  
40.137818555383 42.5664883002833 49.6706535876636 41.7575097298927  
TREM1 57.50915811428 39.3999056968598 37.8386378737561 157.677866955988  
37.3508690072156 35.4142595025086 54.8074655158941 41.1575777497576  
37.1820543575123 30.9403229851671 34.266241549578 46.0633179231318  
TREM2 55.0078788655089 42.6939394537076 43.0971787292711 64.2130157241811  
47.9128504683618 40.3357777530419 44.6032218589199 50.9933795450314  
42.6366765186182 43.7303813515864 48.6184776976167 46.0633179231318  
TREML1 46.9939712192224 45.4882438975269 36.0306975524309  
40.5484717678957 42.6022652963326 43.8582747295766 46.3057385979341  
47.8947595316832 41.3803269429468 45.5776159432079 41.0050831223107  
44.5432192783161  
TREML2 46.1673159982664 44.9370339275041 43.0971787292711  
151.601402122351 38.745552403895 45.1873487463472 39.0458123429605  
43.844855336215 38.9834959368496 38.0078357808393 37.4642807402741  
42.4607795638552  
TREML2P 37.8386378737561 41.2598458726002 38.7745734037492  
36.0481934423077 38.3561682218911 38.2293008890613 38.1793598983615  
39.2672712041774 35.7973685350741 41.2276963324981 42.357910063876  
37.4554876386402  
TREML3 44.8914371498528 40.7616966228404 44.2771355310435  
97.4327882336954 42.6520415016543 39.8873706855774 45.8204185866107  
43.844855336215 40.0766543123257 40.3431869033152 42.7275315121163  
41.4508241771315  
TREML4 40.0557788909923 45.5842286511645 43.8495248991589  
42.1273928203021 40.9950639693255 43.7630587657205 53.4921736109774  
38.1835938174625 42.1594905198929 46.5650556481721 43.401782064778  
41.2437378488025  
TRERF1 49.7363778831003 72.2527203451447 70.56368853915  
61.0845101400379 67.4534389579576 56.6172748471831 62.5506324864207  
55.8775622338124 85.5362566454799 84.3464768820344 92.2447473381285  
65.0102534173543  
TREX1 41.4508241771315 42.2577689927563 41.9287023391451 40.8681871019812  
49.32293280121 38.1169703906207 41.0381860307445 41.3506832276112  
40.5912213523345 46.5650556481721 38.3684202018524 43.6753843488695  
TREX2 39.7576136507593 43.2649781354792 48.4890615340603 37.8442841690502  
42.269054475455 38.2293008890613 40.6750540874299 37.5511560880902  
42.6366765186182 46.6598879466655 47.4630625313159 43.0930293831497  
TRH 44.0328992213727 37.4540772310118 34.806104801006 42.2496337895968  
40.9950639693255 53.8461734834857 35.3362091871364 39.6474008369935  
41.5635499110307 51.0055825931636 48.2910530887214 52.8455400026194

TRHDE 38.7537364570873 44.5152708955623 46.6588655218735 42.8235313007746  
35.9894133432376 45.2852528185486 44.4639405506967 54.9919060580109  
50.4974478884077 37.3179578037963 39.3667161654772 41.2437378488025  
TRHR 41.0970259989281 41.7614975630362 40.1985790927248 37.8442841690502  
37.6527901109005 35.9851865044027 35.6720258667432 44.2527566343661  
36.8127605061228 37.8217989841918 41.8168470823451 39.4490233720848  
TRIAP1 147.285007921741 87.2351169088172 113.18951586976  
112.23915619297 129.096406048173 94.5644670313964 125.512567429299  
123.978615472736 162.467159261789 102.490465676619 96.1307490576512  
111.511934617893  
TRIB1 3592.44409869527 3681.41904661708 815.810781070699 2568.97574985073  
1377.24483375075 1012.0373748933 1801.44003951248 2878.82618761804  
1287.41527826233 234.172977976583 427.818758455214 256.995917821765  
TRIB2 215.557210899786 126.253578620746 218.099774231575 145.073599404007  
162.30238363798 136.517445122438 123.674164545425 155.099281008688  
443.581460031166 136.629336440719 162.486448421519 179.186381381821  
TRIB3 179.267796142741 59.4253780950488 53.7792717770978 138.336991036544  
88.9038123445083 57.4777075615651 125.752132815786 118.600699776727  
149.5664106654 95.1000239210194 73.0247140074919 97.7140868175135  
TRIM10 40.4133123405898 41.1212129940704 38.8437052820213  
37.3623275408484 40.3021896270845 41.9069736908705 38.3269307390572  
38.6454098044474 39.2809305246091 39.3866822630357 40.040778349137  
40.1279747892634  
TRIM11 73.3950348855139 86.9032093551446 78.0013795192762  
53.9517841438975 91.7629175712824 65.1291617069903 99.3797043236938  
88.715256326632 82.5344501505114 61.3529667465225 62.1796792097014  
68.9885481504003  
TRIM13 224.450710664296 144.633447485038 137.424708183613  
177.82359682336 109.017269529278 99.0545942554244 133.11655169884  
172.317945975659 146.955326324436 209.497482517298 191.523447800488  
141.055218279065  
TRIM14 40.3478825593224 46.5905131500956 46.6248133231179  
43.6025443656008 41.6267998487951 40.9950639693255 45.2775291511947  
43.0881156095048 44.9761535375753 39.5357194705749 42.0750889188255  
41.2836317141451  
TRIM15 45.9356781508849 40.7952353240579 39.4987030972173  
40.1321264723693 42.2510526338368 40.4779565600984 43.3262148375525  
42.0930656891788 39.4512099697623 39.4710743516517 39.0550139257658  
40.7063426028871  
TRIM16 42.3620028137457 51.8242097797274 47.1496895429925  
44.9928555006158 50.4260283682427 47.0940613507321 47.5130990528612  
46.4392296332621 43.6269210434851 37.2748658409427 41.4959139197962  
43.7347995410801  
TRIM16L 39.4710743516517 39.0894172982439 39.7411455670172  
39.7411455670172 40.8873907150245 42.157627240486 39.6535880152834  
44.5029690493211 50.401623258584 41.7405682794166 41.8168470823451  
37.4554876386402  
TRIM17 68.1780382173625 47.5203201376024 40.0998167098057  
41.0219290963778 55.6617952786921 41.7627910693483 53.8687221233237  
43.1567024035183 53.5473283956867 43.0177448037924 43.3085358214154  
41.1066323911308  
TRIM2 95.2614267797703 136.786772972738 88.2959958615748 48.9944486068347  
83.6438735616921 137.286091889421 99.7529382840954 128.827672077002  
231.555264329444 303.189681281366 210.768576894328 197.841210387578

TRIM21 86.8262463672891 147.017279035061 105.814959179397  
182.80711310964 63.0383605052305 109.137372445043 90.2915974511786  
76.3509533017572 87.6018870099686 85.2634032339854 88.3725577276628  
69.4383198054368

TRIM22 130.985178898633 222.728316525835 228.5355586337  
372.982648892131 68.3928560299063 244.343381048643 87.2351169088172  
85.2849531543957 134.646159826262 84.2960453806012 103.883220270094  
123.689895848613

TRIM23 47.1277338930448 48.2220547806679 46.0241950824438  
42.5664883002833 47.7596919358651 63.6287257620165 46.1634822993009  
42.6036491382658 44.9713479185144 44.7672565800508 49.1953597974224  
51.3709954257843

TRIM24 86.0796981361148 141.423857667761 116.709906902201  
79.9126192278104 173.780433758335 71.3932787152381 118.168529531403  
129.309742451628 152.159270481787 76.6346767983285 68.1992221684165  
66.4626619269287

TRIM25 149.260740603715 259.033660186329 132.369828264246  
390.331295238889 122.904323796484 108.493693862509 162.049698241573  
143.13189461696 91.2488561751625 140.598583034034 128.559660070271  
102.717305041352

TRIM26 294.620463776036 248.963785838427 128.327641457403  
150.529917336161 181.200738629391 129.675613712326 220.938982373755  
174.263925108623 206.571946834892 188.734299563005 159.827302305842  
122.514153407264

TRIM27 135.323750661937 107.094663242259 128.596547789044  
85.3754356809649 187.486245101512 85.6038071277319 169.527304857688  
136.751431410199 99.2341244350412 86.500678864429 86.915098846441  
76.6707262000712

TRIM28 179.360587856432 296.463473585355 298.282957415786  
173.343091136741 529.977491403949 238.077051775147 323.906340044066  
247.416016413788 688.168272082335 225.725485439572 310.358667418222  
203.228211195516

TRIM29 58.8224410806741 198.497745548245 216.976116788572  
47.3574589211166 170.327588764719 58.8605811695948 142.273273748244  
77.8220670093392 214.691909801388 216.911833562615 192.861174667738  
203.808195515747

TRIM3 43.844855336215 44.1239711172417 49.1067959632109 45.4634652319753  
43.2484996523549 49.4157684139858 40.2601451506332 47.3791873993182  
51.6258604434499 52.7288095750893 53.5698357689852 50.3388505346542

TRIM31 95.4841914842335 64.0903425729408 53.8724557170772  
39.7901937802774 44.6231541342 48.4758590019384 56.3376046940285  
102.626604917608 205.121208974511 61.0935621637178 152.612579631539  
318.069132873489

TRIM32 135.92805172353 129.925137664962 72.4202724008052  
84.8948024208923 115.970093171058 99.8323169037315 138.923143963742  
94.3773551105819 100.52186805932 105.29989739819 127.160252453685  
121.149803296368

TRIM33 186.161177110898 242.546821017091 195.376772135023  
188.928047145068 228.660261263355 167.626012561905 284.437758089699  
215.609821689043 277.069127740648 260.383969219887 263.636675573982  
228.703786640132

TRIM34 40.6062943725118 39.4600924554505 40.148780650831  
40.3541929047564 42.039525923161 40.9065865588657 42.3194600586894

38.3312475273065 40.4518431978241 41.2700204291848 41.2226607554583  
41.7575097298927  
TRIM35 48.0201377454632 52.3187919317561 49.6347864008749  
49.9672547361866 44.5668141895992 45.3882138838137 44.0687697278114  
44.0736170668178 43.8106375505041 46.441301934328 47.7996867053249  
48.4849194706125  
TRIM36 39.6292788039793 43.9625135383093 40.6210258686042  
41.7064916467908 42.6513317049037 41.2202950824622 39.4600924554505  
41.5041249304216 43.3262148375525 39.5357194705749 40.5090849993014  
42.5386078355693  
TRIM37 61.7551416187554 70.2725751014865 75.0946376748497  
63.5343940247764 97.8309399470621 79.953657052127 69.9214859673839  
60.6706478075023 82.0993943936197 52.6158214961123 58.1840322066411  
58.3586374083245  
TRIM38 120.837993273922 154.309544187593 96.7948977485109  
144.116701129933 99.8699868526053 79.953657052127 225.088911324737  
132.931052537195 63.1091746640396 85.9910479975356 112.753674408958  
106.804269453898  
TRIM39 119.853516482249 80.9663216993544 81.2269477373795  
99.6946103680372 99.9951025176909 91.8295472317386 80.8285585008048  
70.9702772728923 71.7215348945466 120.692330556005 100.378474310825  
89.8808683919332  
TRIM4 169.818067865324 192.058030454066 156.08027400493 176.27162536342  
224.945809325258 181.298709635609 104.103899614521 143.042664581646  
142.1823033942 255.241295723095 237.237762964658 227.94699237549  
TRIM40 41.2424637338424 41.7337506166619 37.5597671487621  
42.8235313007746 43.844855336215 34.4896350146096 41.3594868055879  
40.7311497914871 34.3842972343227 43.9450023643394 38.6662194645633  
36.1647506311964  
TRIM41 84.1868287819063 91.4581948567397 151.135296427249  
78.7450149191851 94.7604013126314 85.2260422401241 75.656434170689  
95.3631043301461 98.0023132593711 95.65872032796 100.188736523729  
96.6957892186886  
TRIM42 42.6036491382658 37.7384958256497 41.0356368374708  
41.1886975241176 50.0580547772867 40.3357777530419 41.4742337714895  
42.2577689927563 38.2215591930186 39.5637454855233 43.4709415392696  
43.0930293831497  
TRIM43 39.9697332660833 38.0226905622357 36.8730514568925  
34.6468794865286 35.6434124419782 40.5281496800812 37.7136011474903  
38.956280281655 34.226171989766 39.3698811593364 39.4410515050885  
37.2810767789306  
TRIM44 354.634819362978 362.724027984972 314.819739055632  
392.237227927376 327.729165976539 601.611039798626 295.848968688724  
699.488969175268 364.628602969366 579.482255191456 528.840700144811  
693.056793637199  
TRIM45 80.5437011468815 77.6653462778309 67.0421310720934  
58.1798515131249 201.764909400617 86.0630164348952 137.335224748204  
103.199200862158 86.3533120291957 96.1044453515408 77.6653462778309  
70.6903168772326  
TRIM46 64.7766649630041 36.1232327599945 51.9214790114499  
39.7411455670172 79.9161139112432 55.4694986901287 57.1070449050465  
113.767996184128 50.3245489035833 39.6719190054379 44.3763859390287  
43.7672102682067



TRIM47 169.561107057293 65.3694267397114 78.450972383987  
89.1290937615998 62.5106969730855 173.288267403695 55.4004611309636  
66.4207938873541 129.538159906075 97.1201502245778 80.2381651206227  
68.9885481504003

TRIM48 40.6559419616644 36.4002279956519 43.0971787292711  
38.4208429103799 36.2048942610546 38.4330755397458 39.8695929627783  
36.2539950294089 36.197424053556 36.8059561571675 35.9563099719284  
39.5418280570561

TRIM49 59.5000730792772 52.8796369426118 62.3245608177257  
81.6780581904253 56.6951078698291 73.688423848106 57.1070449050465  
55.8087097725119 63.785471218558 65.9189023794337 61.0094935318105  
68.6047087267554

TRIM5 72.2527203451447 140.921774805792 134.601217321316 94.2090303695946  
83.3617516092961 68.839885767937 112.000099082544 59.8158518516035  
116.530589514041 68.2215392821251 86.1055862202537 70.0196904419961

TRIM50 39.266565827316 42.9020321355927 40.9818899755491  
41.8291484190524 46.0043807840705 42.4155142987678 41.5817737564592  
44.5658219748173 47.417512242919 42.8414096678708 42.7275315121163  
43.8336862998829

TRIM52 57.1046180136491 68.5251167137806 88.0928147176452  
77.2218991550552 60.5290966885203 60.7488007939604 63.928488869459  
80.7067505750848 54.4059109100338 76.1382217104599 83.5069968129733  
74.9294208313176

TRIM54 42.7671420440641 40.8880530359822 44.0028192158386  
41.253645578517 42.4864576619427 41.2567470068038 42.0605906240248  
41.7419877611072 40.9423087727566 41.3581040307311 45.2653510890403  
43.3234153488091

TRIM55 38.5648843914189 37.2810767789306 39.1433524273815  
41.1886975241176 40.9950639693255 39.6251842352088 43.0398514059634  
39.4987030972173 43.713206937726 40.9607305725196 39.8184668132023  
37.3043739460234

TRIM56 77.0301627655229 88.5706300816555 84.0785633788363  
83.4756142147167 82.5344501505114 78.5276518966943 86.0796981361148  
112.613079254002 110.757899996422 103.264100180823 118.10944558223  
134.024691118762

TRIM58 44.9896851005259 46.5650556481721 43.4709415392696  
46.614092935749 41.8806343997257 41.0582900711341 44.4639405506967  
43.0390857698452 39.0775870687758 42.1622837416589 42.170702295259  
44.1452943804044

TRIM59 40.3478825593224 36.9994058279362 37.1643693306382  
35.0448343468967 33.9142669203111 36.4986986135769 36.4098694708483  
35.3608605269276 36.6312676076142 34.6720534245631 36.131485826118  
35.9604262434141

TRIM6 91.983638239817 62.9313387640547 62.1397042662581 54.4586176399381  
48.0234896130991 61.9944005465335 92.3034609409756 115.691017747672  
67.2022549641647 90.2790229242453 101.699631771662 66.4626619269287

TRIM6-TRIM34 36.6062356000449 38.0834507308871 36.6203885854289  
39.4569929845912 39.3999056968598 40.244271403831 39.0788811357542  
36.0769332065122 36.0123765382627 38.2550371518309 36.8850426107619  
35.6427313468066

TRIM60 43.2135791259317 41.4508241771315 44.5544727111028  
41.0219290963778 44.3166120733789 44.5099734963815 42.8036731479932  
42.4926864381766 43.2761454096265 41.6373771565199 46.4753015651202  
43.6434576713809

TRIM61 45.7356815244513 44.5152708955623 51.7138050344355  
43.5627649099623 62.1836961153924 58.3387916574158 52.8496345990125  
42.6450179841129 43.4656637536244 42.0621425894624 47.6125796208753  
52.1918130336397

TRIM62 41.3387790895716 39.3999056968598 44.4311655729487  
33.3231576795423 36.3390947880186 38.2293008890613 37.4772922422734  
40.931294690669 34.2973261206803 39.0648733099061 45.0589947942306  
33.8196020406676

TRIM63 40.148780650831 34.6306468196142 32.9174234020987  
32.9879066304034 38.1644569189523 47.7556758818053 32.2796484885898  
46.5717043290731 38.9834959368496 43.401782064778 41.7272875295469  
41.4508241771315

TRIM64 47.2862299990938 46.2286164776607 46.8267540220952  
46.4555908533915 46.1804647841331 49.4157684139858 43.8206425661746  
44.7044140979108 40.8970401536578 46.1390887492649 43.7585538437696  
43.7672102682067

TRIM65 94.5358147295719 60.2547250212462 77.268323196327  
72.89602312859 101.383978726419 67.6817814091697 56.7780520416533  
94.4618437533343 72.4220552950926 61.2604442862522 67.8570354010492  
57.5372732453319

TRIM67 45.6517320730042 38.1312950900467 38.1421709520616  
41.5464765641928 41.2740822675592 43.3785777889265 35.7055410599146  
44.7044140979108 35.860430241131 40.2112371512838 42.5426057453993  
40.7704587752083

TRIM68 110.214922820817 128.256151920468 187.628738023353  
110.112236384679 81.1214257028304 142.957149812186 102.626604917608  
108.945545005203 170.390108862804 227.535855856645 232.320396482547  
213.590067519021

TRIM69 43.3085358214154 42.3550738181144 40.1985790927248  
56.7351380543324 38.6134012710484 44.8142634024197 41.8695090436685  
40.5654775358427 42.7150227340364 38.8043560812482 38.2280071951674  
39.4490233720848

TRIM7 48.1952521496489 64.5845827915699 56.2000979702695 46.6781384361786  
45.3120826392641 46.9395507483816 48.1196483432815 43.4812166409346  
65.1009848240098 50.2750065554387 39.5399188536544 47.7390230243778

TRIM71 42.442231667357 39.9697332660833 41.437237454134  
41.6564075217517 46.572043843509 43.8308097066396 41.9918605927928  
40.047314525032 38.2215591930186 41.3641352453779 39.3667161654772  
39.4830039788612

TRIM72 41.6354649482853 39.3999056968598 40.8420925848403  
37.651298468202 38.1644569189523 45.6129956328415 37.9430145836712  
45.9604707098953 38.5252456306656 38.2069499294002 42.8263096141654  
35.3525469364579

TRIM73 38.4278323739711 42.3781558291981 41.6079958749402  
41.7082242184693 42.4864576619427 40.1428591998404 44.0256815382334  
41.3962888656479 43.3744503319109 38.042028333747 40.4504608195666  
42.8332435050083

TRIM74 42.6036491382658 43.5873188565519 40.7620472083159  
42.9358255168086 44.3557408297309 36.9060997041453 41.0381860307445  
44.2159020605784 47.5564423692142 52.6879797806876 43.9450023643394  
47.6938628797168

TRIM75 43.0930293831497 40.716553247236 39.8299340037009  
41.1886975241176 40.9950639693255 43.5752393599169 45.1017494688414

|        |                  |                  |                  |                  |
|--------|------------------|------------------|------------------|------------------|
|        | 43.5544347011646 | 46.0106098064475 | 44.7958122466628 | 38.8507804383261 |
|        | 40.8681871019812 |                  |                  |                  |
| TRIM8  | 639.120117930957 | 1005.45493369789 | 689.228901128857 | 454.02808608679  |
|        | 537.471287449696 | 788.232434009173 | 537.471287449696 | 434.841521967958 |
|        | 545.514314651238 | 813.767981539781 | 708.005870621064 | 793.225863118464 |
| TRIM9  | 45.8669209716694 | 50.9140366501664 | 46.1907664490247 | 44.9936360641969 |
|        | 44.9467652377494 | 43.647594238679  | 41.706879587091  | 43.8654109265055 |
|        | 50.3732275608139 | 64.9959712888709 | 48.8414921202081 | 47.9147866006118 |
| TRIML1 | 44.436995101921  | 44.3529919625344 | 50.3950981988762 |                  |
|        | 51.949834638817  | 46.4343327861696 | 45.6129956328415 | 48.0283573444179 |
|        | 53.3094843669564 | 44.5303781239209 | 45.7911932481722 | 47.7535797917441 |
|        | 46.6397391251762 |                  |                  |                  |
| TRIML2 | 38.8561375693335 | 43.4396866157171 | 39.5450079747895 |                  |
|        | 41.1886975241176 | 42.4864576619427 | 45.8325181856483 | 41.1507980856436 |
|        | 34.1806289878747 | 42.2577689927563 | 38.957687788868  | 39.153226699662  |
|        | 41.0657892043496 |                  |                  |                  |
| TRIMP1 | 39.4710743516517 | 49.6203214143464 | 36.1042012504758 |                  |
|        | 42.1273928203021 | 42.7107928951766 | 36.9060997041453 | 43.0930293831497 |
|        | 45.1714698794331 | 37.5469247328848 | 45.3530683538086 | 36.6298807161755 |
|        | 37.8490162439785 |                  |                  |                  |
| TRIO   | 91.0346886951891 | 72.5397346298724 | 68.9522412475296 | 95.5022104475922 |
|        | 75.2391243965793 | 67.6817814091697 | 123.455270940015 | 91.1834104205004 |
|        | 77.3367966395554 | 74.6847594297153 | 81.6472320169489 | 95.9391851122771 |
| TRIOBP | 159.071016200059 | 242.546821017091 | 311.1022748407   |                  |
|        | 174.058845828966 | 176.318618244066 | 356.948763043851 | 237.039707901886 |
|        | 135.19133529995  | 311.810240385503 | 363.527881831453 | 289.25391828279  |
|        | 228.703786640132 |                  |                  |                  |
| TRIP10 | 87.6861665523251 | 110.287699369482 | 266.250887288858 |                  |
|        | 92.4781449270918 | 139.294987640071 | 153.626578526803 | 138.82907142482  |
|        | 168.11088055793  | 132.851109034738 | 163.360824752796 | 73.4853298204744 |
|        | 71.0340758556049 |                  |                  |                  |
| TRIP11 | 134.519244495139 | 111.77505926669  | 144.757886965525 |                  |
|        | 147.689479458785 | 112.990752518897 | 123.61359914862  | 98.1371527802953 |
|        | 78.9361044544626 | 155.239308003808 | 114.429965793669 | 117.8523906126   |
|        | 152.47776741936  |                  |                  |                  |
| TRIP12 | 265.320447667174 | 173.977605406146 | 218.013913036142 |                  |
|        | 274.445985892762 | 174.275409358652 | 180.065047496273 | 129.538159906075 |
|        | 360.15483218921  | 209.87862540213  | 184.377148097206 | 199.480636964499 |
|        | 235.682605856428 |                  |                  |                  |
| TRIP13 | 144.266359480086 | 208.379981648601 | 107.501868837432 |                  |
|        | 63.9570596163747 | 984.650089846917 | 151.99110418225  | 435.325038193179 |
|        | 281.774690337889 | 187.147252401703 | 42.785429206422  | 48.6184776976167 |
|        | 54.293880614303  |                  |                  |                  |
| TRIP4  | 198.979794834746 | 204.370291548631 | 131.882285871258 | 167.336256089476 |
|        | 158.321459945365 | 156.864177272437 | 159.176229924883 | 187.560170529807 |
|        | 192.291576499908 | 140.837788264535 | 130.64028226556  | 140.559370165331 |
| TRIP6  | 502.205366225368 | 539.720977763663 | 674.270050283701 | 256.80504454312  |
|        | 815.810781070699 | 498.958550919515 | 426.145924040944 | 283.88971280023  |
|        | 1096.1705171588  | 624.097858948785 | 698.595302020108 | 563.573152902421 |
| TRIT1  | 304.977139992391 | 275.549982777518 | 203.178221073902 | 105.234356571498 |
|        | 334.438091900861 | 137.976238593619 | 213.073369426342 | 235.169335305672 |
|        | 638.848775860866 | 254.373837233228 | 196.034087004464 | 271.070078611015 |

|          |                  |                  |                  |                  |
|----------|------------------|------------------|------------------|------------------|
| TRK1     | 42.2455707947223 | 45.1694246393676 | 42.3536549114165 | 53.593974682612  |
|          | 47.3172462673426 | 52.4351670989268 | 45.8980298854198 | 39.1652965788406 |
|          | 34.0382693188794 | 38.8507804383261 | 40.8225507267584 | 46.6397391251762 |
| TRMT1    | 98.9463403584348 | 118.57174795047  | 151.686513723244 | 129.592927998658 |
|          | 382.050584680669 | 157.334378544568 | 140.01041112896  | 160.479699603187 |
|          | 122.143519601825 | 135.62451026691  | 162.401599565682 | 157.750574478926 |
| TRMT11   | 56.8615710057357 | 76.093116738739  | 67.2811786080606 |                  |
|          | 51.4968903591058 | 64.0395697320109 | 66.9665871090772 | 66.6199412368667 |
|          | 49.7748385529588 | 63.1091746640396 | 61.940656536312  | 84.4596873416863 |
|          | 73.2842501003097 |                  |                  |                  |
| TRMT12   | 215.399634344016 | 138.655669174533 | 103.071727621257 |                  |
|          | 84.8948024208923 | 174.64729344609  | 110.399579382196 | 111.202737864873 |
|          | 111.404796541459 | 141.410183156424 | 128.873145026756 | 105.406282523992 |
|          | 116.685453817071 |                  |                  |                  |
| TRMT2A   | 61.8529316708431 | 47.4076235350059 | 46.2625470410195 |                  |
|          | 38.2041059863839 | 47.5647821785529 | 38.1169703906207 | 38.5066108855005 |
|          | 51.555506218204  | 47.4699236780425 | 55.0016608333828 | 46.5650556481721 |
|          | 46.5650556481721 |                  |                  |                  |
| TRMT2B   | 40.8681871019812 | 36.89524015739   | 39.6451483836089 |                  |
|          | 38.745552403895  | 43.2484996523549 | 37.8102105794655 | 38.941855825269  |
|          | 43.6434576713809 | 45.0997987980157 | 45.3530683538086 | 57.4078217542368 |
|          | 46.0633179231318 |                  |                  |                  |
| TRMT5    | 364.439669236186 | 530.996217072759 | 471.59454368268  | 444.320714312359 |
|          | 555.727708387209 | 731.670315613547 | 1005.45493369789 | 590.709061039001 |
|          | 821.922096305069 | 302.20349084931  | 367.685570437603 | 407.564154455615 |
| TRMT6    | 43.4626049853157 | 43.4396866157171 | 43.5710871617107 | 42.1273928203021 |
|          | 46.0977687311222 | 42.6575535390785 | 38.7337086062875 | 43.0390857698452 |
|          | 41.074824727477  | 40.2112371512838 | 44.4688999098904 | 41.4508241771315 |
| TRMU     | 72.692416146584  | 65.6010220593397 | 58.7382738968248 | 54.4586176399381 |
|          | 83.2652824564032 | 49.8472708021525 | 63.7721358300879 | 65.1637149462661 |
|          | 56.8622704143595 | 70.194061829681  | 79.0304119352941 | 61.2685222381296 |
| TRNAU1AP | 44.8378856799291 | 51.0612189196487 | 54.1637401903523 |                  |
|          | 44.1483976313959 | 48.0234896130991 | 55.3812135024656 | 51.8667932650345 |
|          | 43.1567024035183 | 45.5779686360641 | 53.5498255316009 | 49.3901004211918 |
|          | 48.0350549043063 |                  |                  |                  |
| TRNT1    | 64.7766649630041 | 68.3234331335073 | 65.1757400078647 | 58.5406981871153 |
|          | 64.1021292413458 | 50.543526404059  | 64.7650773032999 | 74.6572522248684 |
|          | 63.4531374125233 | 54.6806670921411 | 60.3093790894864 | 65.4435809676217 |
| TRO      | 86.398312296224  | 52.1646670865427 | 52.4876329865056 | 79.3614922672599 |
|          | 69.303129494807  | 77.9085946827079 | 103.179198287911 | 111.626292905866 |
|          | 42.8036731479932 | 67.5503668962444 | 57.9559082408796 | 48.2220547806679 |
| TROAP    | 131.738693662183 | 140.961217055867 | 94.6130003107132 | 62.0404348860702 |
|          | 173.035987237848 | 50.4022543872993 | 191.631209717054 | 202.081933301612 |
|          | 175.619398238068 | 43.2988017098387 | 46.8954576545929 | 45.6692241948108 |
| TROVE2   | 179.756604242873 | 150.583488352207 | 208.915145509698 |                  |
|          | 233.710655978992 | 156.242688079359 | 285.511923726609 | 166.208731611481 |
|          | 242.190059393491 | 149.475318376458 | 270.394857925086 | 271.138311888031 |
|          | 257.194689822426 |                  |                  |                  |
| TRPA1    | 34.4021554788966 | 44.3529919625344 | 42.8270038153139 | 38.8495095797881 |
|          | 52.0583273941813 | 43.8582747295766 | 42.629412460409  | 51.555506218204  |
|          | 40.9901805728485 | 42.5664883002833 | 35.7953070087288 | 41.863927676552  |
| TRPC1    | 69.8712342353417 | 43.683792219729  | 47.3861758958576 | 53.3967242431461 |
|          | 42.7982502551634 | 126.319731178054 | 59.9792284253187 | 102.24202987437  |
|          | 47.0804681460898 | 96.577572948724  | 86.7730065232892 | 64.0541263553251 |

|         |                  |                  |                  |                  |
|---------|------------------|------------------|------------------|------------------|
| TRPC2   | 37.9684178523773 | 39.9697332660833 | 37.5222959113204 | 39.4569929845912 |
|         | 40.3452320167286 | 38.8336427948187 | 40.6216891610774 | 35.5179217192467 |
|         | 39.7537274655115 | 38.3501188844251 | 42.2618615571566 | 39.7844133452634 |
| TRPC3   | 46.5549623118323 | 44.6918600441328 | 34.8956628705329 | 38.745552403895  |
|         | 43.5544347011646 | 53.2046867327331 | 48.0283573444179 | 41.1575777497576 |
|         | 41.3803269429468 | 52.8928296360463 | 47.2134341420411 | 43.2776458914333 |
| TRPC4   | 37.3463875295726 | 50.0425298550559 | 41.785676764591  | 45.5869891570251 |
|         | 46.8674366115656 | 40.7616966228404 | 41.5817737564592 | 38.4540849632254 |
|         | 47.798305839406  | 42.785429206422  | 43.0971787292711 | 45.7562276914441 |
| TRPC4AP | 469.553640187203 | 582.511224532378 | 439.46735042867  |                  |
|         | 330.391945158969 | 401.45848063233  | 299.890705180422 | 546.287195443189 |
|         | 339.210875653066 | 369.258587948416 | 331.762920362224 | 455.444228161475 |
|         | 269.044011137638 |                  |                  |                  |
| TRPC5   | 40.148780650831  | 40.0527893189096 | 34.9849896310235 | 33.8111782249716 |
|         | 40.148780650831  | 37.3799542961839 | 38.0598374201407 | 38.079222289614  |
|         | 35.2143190355414 | 36.8059561571675 | 39.9899430628542 | 35.7451401627836 |
| TRPC6   | 58.651329686676  | 50.2163892855092 | 53.6837370963602 | 56.6458456890715 |
|         | 49.452985143568  | 51.8103411703261 | 55.8019623191927 | 58.2043532960091 |
|         | 46.9739160257217 | 51.0055825931636 | 51.7538628098347 | 48.8670821164567 |
| TRPC7   | 45.3872406432794 | 39.1982470626863 | 43.6670755115848 | 44.1483976313959 |
|         | 41.1868052124344 | 40.244271403831  | 45.7452456977857 | 43.0390857698452 |
|         | 40.0403898620771 | 43.2988017098387 | 41.5421429082231 | 42.57175366709   |
| TRPM1   | 34.8099089553046 | 39.0894172982439 | 40.301483914446  | 37.4223289687135 |
|         | 40.4639532172338 | 41.3553369544097 | 38.4005795891396 | 42.0494116081998 |
|         | 38.7298222155532 | 39.6719190054379 | 42.7275315121163 | 41.4508241771315 |
| TRPM2   | 46.68364047986   | 46.8954576545929 | 41.0356368374708 | 54.1952533541951 |
|         | 52.2089306840125 | 41.6590564937735 | 47.6810611485413 | 48.9826868640753 |
|         | 49.3780606970538 | 44.0719548209593 | 47.4630625313159 | 41.1554481567603 |
| TRPM3   | 38.4344387289956 | 37.4540772310118 | 38.2280071951674 | 36.9456005425764 |
|         | 38.745552403895  | 40.5912213523345 | 42.3074504864935 | 36.2885860224741 |
|         | 40.3316153483289 | 38.6005272730664 | 38.2280071951674 | 38.4330755397458 |
| TRPM4   | 126.528654651607 | 177.878878992191 | 263.636675573982 | 53.9517841438975 |
|         | 200.450523205251 | 70.5699797830702 | 100.650129064849 | 222.696947669812 |
|         | 194.435776102991 | 143.443713592074 | 148.514056973195 | 93.3644318958633 |
| TRPM5   | 36.2496364442264 | 45.6533175604486 | 41.3366779545815 | 40.1804147506786 |
|         | 41.6806984441849 | 40.9506062495231 | 37.6036146841933 | 42.5435283762933 |
|         | 49.9951674107458 | 46.441301934328  | 41.6336636285875 | 44.9070250604284 |
| TRPM6   | 46.0920218698606 | 43.0227387991135 | 45.8844325913247 | 55.6481366056639 |
|         | 45.1137938810047 | 50.4022543872993 | 41.253645578517  | 44.4031868028216 |
|         | 59.0563795877672 | 43.9450023643394 | 49.1067959632109 | 41.4508241771315 |
| TRPM7   | 42.7150227340364 | 41.7337506166619 | 44.8872784170036 | 48.9944486068347 |
|         | 49.9493230064613 | 45.6129956328415 | 49.6872467499977 | 44.797320243931  |
|         | 44.7058233759912 | 46.0119912782855 | 45.2265319826548 | 44.6484005362281 |
| TRPM8   | 41.4508241771315 | 38.861780967827  | 40.244271403831  | 40.4967168818294 |
|         | 39.6535880152834 | 39.2248354955045 | 41.4186558780356 | 41.5934628038429 |
|         | 39.5411918095433 | 37.5597671487621 | 36.9060997041453 | 41.6550823405646 |
| TRPS1   | 40.8681871019812 | 38.5252456306656 | 37.1643693306382 | 46.614092935749  |
|         | 36.5393857306744 | 47.5733603903505 | 42.0605906240248 | 48.87875862356   |
|         | 37.3600014814388 | 37.8217989841918 | 41.6336636285875 | 45.2783024981315 |
| TRPT1   | 186.042094228091 | 385.675278463448 | 437.148137705103 | 197.895987726243 |
|         | 418.810270137243 | 185.703644892356 | 327.984902171255 | 290.710970844525 |
|         | 168.17913316957  | 271.900886756161 | 220.621142396402 | 198.432987946699 |

TRPV1 45.0246636933144 44.2630383225933 45.1794111055537 39.9697332660833  
40.2909637749145 41.7217466249678 43.1677556681309 41.7926725303709  
40.1730675449465 42.7166857354771 43.6897331183502 42.7782216342806  
TRPV2 100.289042948128 82.1344514651393 105.814959179397 338.846080983216  
70.7760293129408 100.305262467668 69.0037087543684 87.9468208580228  
45.3756389170606 64.3383155834968 67.495246759946 61.9882398986333  
TRPV3 44.6231541342 43.5873188565519 44.696023817801 42.4580504587581  
44.4489662507893 51.294537308199 51.7714254834195 47.6952179922944  
42.7150227340364 44.3648993568405 39.9899430628542 42.57175366709  
TRPV4 46.29198852834 67.4477906495278 60.2528550551807 53.9517841438975  
54.802736966312 42.4155142987678 46.7800033479223 44.0390019242862  
55.9423752286714 51.2786187688564 56.4653357730435 50.2163892855092  
TRPV5 42.9641759692926 41.1212129940704 42.6920011548175 44.0991023527481  
42.4864576619427 44.1737502492846 46.9094108823995 37.1767899214749  
43.6039443285137 41.0608773166058 43.9802831041664 41.5132248356707  
TRPV6 65.2735059202804 45.5842286511645 41.0356368374708 41.8190986513051  
46.2560238004757 38.9378717994178 43.0930293831497 95.5325488969517  
63.7046039657949 57.9713749600418 42.589641010388 42.9292230806949  
TRQ1 44.0328992213727 42.7775752471711 51.0539624358342 45.8844325913247  
48.0234896130991 49.641159251878 49.2546642180676 48.272324215504  
38.2215591930186 47.0055981216687 44.553780984244 48.4535991392809  
TRR1 40.9558083259517 37.4540772310118 37.5597671487621 39.5050383901884  
41.6806984441849 39.132725377815 40.2154497375715 40.7311497914871  
39.3750969348308 39.2623423164488 45.390192977585 37.6557714476853  
TRRAP 610.502562878788 451.711598030737 382.940842652744 329.201360653451  
532.981045084589 349.096725048776 373.172504097546 351.538247518953  
677.481235695517 427.972184856393 446.162602155964 297.739286969257  
TRUB1 46.3390850717989 73.7873098190297 53.7792717770978 44.550322123994  
60.9710783023013 68.0501900087917 58.6431245059655 42.157627240486  
56.7991853808475 44.2580151149956 43.7585538437696 54.9919060580109  
TRUB2 72.2099571536717 54.8979897528792 53.4088637045445 44.9370339275041  
63.25187762908 51.9421032049606 90.7037473522607 60.6706478075023  
54.4059109100338 68.534940191185 67.7280831060202 54.1941919612524  
TRY1 40.8681871019812 40.9731067463382 42.2577689927563 38.745552403895  
40.0599807618105 44.3648993568405 40.5585676679482 37.7612949798895  
45.4799270968969 36.5806287103157 36.6298807161755 42.2577689927563  
TRY6 34.4021554788966 46.0713306971594 39.9101908547397 37.0732977341185  
34.3633615460307 35.2067831864574 36.634024014558 37.9837233601316  
36.3649677956953 41.5435611403119 36.43924066428 33.8196020406676  
TSC1 102.588552148342 91.6033269431304 64.3655212368264 72.4834467838798  
69.1306000876802 76.5888466260562 76.4439037944547 64.9191509252662  
67.8882074477657 104.8505815954 94.4618437533343 94.2678678253657  
TSC2 62.0553450433433 75.7801512652102 104.412207245626 68.878562323012  
68.1209771323232 65.1291617069903 76.2478685333968 63.664265793911  
72.1090339831747 84.8999904158793 90.6805895192707 73.3533274030352  
TSC22D1 442.99540222483 258.789217436101 498.608204176238  
195.376772135023 209.438270055157 798.033975337132 232.47874874281  
336.679355848349 255.197732321307 301.025314855652 459.546279672649  
548.047774435177  
TSC22D2 151.175959542368 126.599642760314 159.844078593375  
186.042094228091 205.187554095744 171.877918435017 122.877322487518  
257.194689822426 163.405230398941 110.334176022265 225.875798191473  
179.756604242873

TSC22D3 144.484560429882 140.732068737192 268.936151471133  
755.106456358949 105.945216149549 434.223722811041 73.4019696977096  
126.274897979594 124.998771394658 149.45630414346 212.92335057985  
203.690807551768

TSC22D4 84.9075858560758 90.0420794458477 90.6191520659197  
98.9560329133205 113.18951586976 73.1169003714219 105.802035886293  
81.1284422173774 148.558544568518 92.3388129097482 94.0777119695783  
61.1022920882065

TSEN2 125.209476374199 237.754990288051 248.691595276298 91.7068354379889  
325.172633427119 161.268186656743 233.90802199627 186.325752658912  
169.557757933574 229.512022912803 232.815747390118 173.434174644937

TSEN34 350.796638646601 513.57613902662 548.601467852543  
530.314249832491 784.268074988084 469.30167430316 559.559234461244  
504.281506941044 545.827286197333 417.201611973051 382.872356030213  
413.31638457585

TSEN54 113.583259458107 91.8207081349104 114.039396407323  
91.0346886951891 129.456543260731 75.0310858627394 160.015674121695  
106.78552222475 177.067668324062 107.242476674629 92.3901719424121  
82.1365334012643

TSMF 98.1495112518979 111.166893747402 93.4180535865914 110.431464700539  
95.6182216943758 90.7101037998119 114.947362505193 109.811921160228  
112.743602566917 78.1683130800805 76.5505585423421 88.8330881965986

TSG101 421.611594456877 754.700295017212 618.892379887961  
639.391575249793 333.566613571224 518.527535205975 419.46223841313  
395.457351443921 575.268446033282 540.304257899761 465.887689708274  
612.441960343995

TSGA10 41.7397731376692 45.7979032939211 48.3570240922825  
39.6292788039793 44.7829632472754 39.8873706855774 45.1017494688414  
43.3729486804084 44.7804080899431 44.1765254182701 47.7180816682562  
47.6040671292013

TSGA10IP 44.9896851005259 44.9370339275041 45.3974838013476  
40.0698728584484 42.269054475455 46.0364000143537 38.2933870238743  
40.2382908228517 33.6902293666089 51.6778366958973 44.6286581923295  
38.8495095797881

TSGA13 40.7609952437622 40.0527893189096 37.0642268327439  
36.4564050256915 39.4693871570028 35.8227939208521 41.3594868055879  
42.0494116081998 35.4332080966594 39.9948390976317 45.390192977585  
44.6484005362281

TSGA14 57.8277957325085 149.02612008344 128.281765653795  
58.0218262176065 143.399636653204 73.6323065529916 118.736188485344  
63.0245691276326 114.876346000655 70.3629652777935 78.963270461629  
98.9017950719795

TSHB 41.4508241771315 41.8848959280916 39.991353369336 36.7892997857376  
40.5710637884029 37.7000400506818 38.2933870238743 37.5511560880902  
45.3756389170606 39.6719190054379 40.723990462047 36.8690774823319

TSHR 35.8751688814823 36.8120548820504 41.3708420203838 39.5050383901884  
38.7767041675794 36.0306975524309 41.5464765641928 37.6058760248614  
38.7578265341627 35.6866725912421 38.5233040786032 39.4895632499291

TSHZ1 91.9534828522538 98.3240331951021 107.034189847828 140.35042464015  
60.9710783023013 165.992057520727 62.5506324864207 65.3715655467882  
117.282216847547 137.294289316915 145.847014515246 152.612579631539

TSHZ2 101.002303802745 84.4596873416863 142.417106615034 109.144663527001  
51.3511088648386 359.889643461047 148.440257128143 114.230358276599  
68.9038222450855 351.951456642829 296.598410253206 317.406465928295

|          |                  |                  |                  |                  |
|----------|------------------|------------------|------------------|------------------|
| TSHZ3    | 251.905799624693 | 107.176733647834 | 73.4962349716902 | 198.190904631121 |
|          | 85.7842344710572 | 272.36028618845  | 47.4439407315335 | 127.213248611204 |
|          | 46.4861258030402 | 314.36962447353  | 263.765914589758 | 189.516455814322 |
| TSKS     | 46.7293238583888 | 43.3458769998118 | 38.3166554965434 | 38.6414316877471 |
|          | 37.1565984182084 | 49.2050538150106 | 36.4098694708483 | 40.047314525032  |
|          | 46.2027193115397 | 41.8613406887824 | 41.4508241771315 | 43.0930293831497 |
| TSKU     | 705.283979182062 | 428.515605971056 | 751.150916058018 | 179.662015390213 |
|          | 325.676668250281 | 261.081844108932 | 323.048740324895 | 209.87862540213  |
|          | 624.51670158046  | 801.351998609551 | 759.184121753305 | 899.223276238109 |
| TSLP     | 42.7150227340364 | 37.3179578037963 | 38.8417151851134 | 41.0726336841311 |
|          | 42.7489468897708 | 41.809704036355  | 45.1694246393676 | 40.4359177791566 |
|          | 44.7771939752086 | 39.1832968442811 | 43.0016969050339 | 42.1537476443423 |
| TSN      | 41.4508241771315 | 39.0894172982439 | 41.2365089689635 | 58.0218262176065 |
|          | 44.9936360641969 | 40.1428591998404 | 41.1507980856436 | 41.7419877611072 |
|          | 40.5912213523345 | 41.4397539024976 | 45.6348103033479 | 41.1554481567603 |
| TSNARE1  | 56.4553747079294 | 39.8695929627783 | 42.9104454767916 |                  |
|          | 41.8778873678551 | 43.2484996523549 | 44.5544727111028 | 47.1345949868029 |
|          | 41.5464765641928 | 41.9635525160083 | 40.7063426028871 | 43.401782064778  |
|          | 45.8546719310325 |                  |                  |                  |
| TSNAX    | 60.1705241170421 | 99.7807691901691 | 141.410183156424 | 110.666686474986 |
|          | 95.8446272966902 | 97.152024864444  | 89.5597629049747 | 70.5761249670572 |
|          | 69.779139490544  | 51.2318935933116 | 71.9000032422349 | 83.1308709614708 |
| TSNAXIP1 | 36.3649677956953 | 40.2493681589104 | 42.5406888281114 |                  |
|          | 34.6468794865286 | 38.3561682218911 | 42.2577689927563 | 32.6530576979948 |
|          | 48.3590401011623 | 36.5393857306744 | 38.6454098044474 | 38.3684202018524 |
|          | 36.3454320848591 |                  |                  |                  |
| TSP50    | 35.2267149016596 | 41.554942319225  | 46.4569566520107 | 39.3750969348308 |
|          | 47.0954207417646 | 38.3418933808844 | 42.357910063876  | 38.3684202018524 |
|          | 47.5564423692142 | 60.2877434874622 | 48.2910530887214 | 47.8931773060789 |
| TSPAN1   | 555.542222746155 | 65.084620579901  | 183.028254350275 |                  |
|          | 55.4180794172794 | 52.4370718282084 | 53.2046867327331 | 56.3376046940285 |
|          | 61.130286531713  | 285.689076149891 | 195.205980592503 | 212.967855232105 |
|          | 352.292837622545 |                  |                  |                  |
| TSPAN10  | 59.5000730792772 | 37.2810767789306 | 40.6737160001291 |                  |
|          | 41.0726336841311 | 50.7615314686244 | 42.5660695551615 | 54.9765783642973 |
|          | 57.7805922926828 | 69.8899273527731 | 49.9493230064613 | 46.1673159982664 |
|          | 43.4709415392696 |                  |                  |                  |
| TSPAN11  | 40.8091178323174 | 37.2810767789306 | 40.9818899755491 |                  |
|          | 35.249124243346  | 40.5235471987417 | 35.3502070248613 | 37.8877750141557 |
|          | 37.0932890050788 | 37.9837233601316 | 36.9848592422398 | 40.6373400186325 |
|          | 37.6557714476853 |                  |                  |                  |
| TSPAN12  | 66.3095900379311 | 85.9555871743678 | 107.827560253663 |                  |
|          | 48.055683217958  | 47.6884372645373 | 46.3203995372658 | 44.0137388752186 |
|          | 61.6084234634424 | 82.966263655525  | 54.3163440690038 | 63.7024494337186 |
|          | 66.295597720304  |                  |                  |                  |
| TSPAN13  | 275.222714101589 | 251.983470875355 | 224.14182624489  |                  |
|          | 123.281175151414 | 349.096725048776 | 115.357402077859 | 147.115466503902 |
|          | 164.96500173066  | 371.393488010768 | 115.557690369703 | 207.30460556799  |
|          | 256.490125972545 |                  |                  |                  |
| TSPAN14  | 48.6621527194963 | 77.268323196327  | 60.0856496605043 |                  |
|          | 60.7741670229412 | 46.0043807840705 | 43.8582747295766 | 67.6767845246581 |
|          | 42.4580504587581 | 128.923092916744 | 87.2316853416374 | 76.9454624478854 |
|          | 72.6182747525443 |                  |                  |                  |



TSPAN15 251.4927207704 125.676172266736 114.734157967466  
86.3663084195994 108.607805039005 67.8208976798364 174.64729344609  
214.073500272341 631.632335640448 102.490465676619 178.123995338196  
117.127994102455

TSPAN16 39.8662795144616 45.8669209716694 43.0016969050339  
43.9282059368202 41.2740822675592 43.4681646416585 46.5650556481721  
42.8482181313226 38.7298222155532 43.844855336215 43.0971787292711  
43.1805016690297

TSPAN17 576.367042159347 225.300736968225 305.279475274196  
224.14182624489 300.845404774478 134.994839576312 220.03226547675  
443.269396125834 264.407051461506 175.441884261362 189.915336406793  
185.667983376361

TSPAN18 56.1671440556142 57.8074430738539 52.761508834671  
69.2685201884906 41.7929491793697 127.034476771265 40.2154497375715  
48.2186010376187 40.4220196471124 59.5232818903622 75.4317740345967  
58.5478485621444

TSPAN19 42.9104454767916 43.2649781354792 46.7508829977587  
42.0102671859606 39.6535880152834 45.2852528185486 44.3440839686558  
44.293922970134 41.074824727477 43.6033221838149 35.860430241131  
38.4330755397458

TSPAN2 37.8877750141557 43.9783383422823 36.7172300749476  
36.1562979552173 39.2114264935239 57.8944021095265 41.5817737564592  
40.047314525032 39.6413313949444 47.2299678280724 45.2265319826548  
43.9541718254769

TSPAN3 435.632247999054 747.21265644111 285.56460901579  
280.034472186873 275.549982777518 244.560715635796 236.139267415604  
195.968119243879 407.818713538416 136.947616119439 177.212612563444  
276.699609951994

TSPAN31 282.035361446993 284.013140015092 525.35784336478  
298.367217540986 151.621572940457 319.092568066532 362.506098778318  
491.8684831079 446.902178094675 542.268540029548 613.060733526013  
485.698327133705

TSPAN32 48.269710976471 50.7487159427973 57.2621337590957  
72.182385135126 42.269054475455 59.4212529620447 40.6750540874299  
46.1081155967151 39.1507435605516 46.2746453974782 49.1994379805496  
39.5693390837225

TSPAN33 75.5751205142867 89.3868257841517 59.5444359507702  
116.295564219236 92.3034609409756 64.5187138759372 117.138945281875  
147.405190988088 90.2790229242453 137.831070407907 139.614715580418  
77.6056319020116

TSPAN4 113.929486370331 76.4043833380327 89.2913927776683  
165.440751113862 88.9641595603127 272.198774144152 56.6951078698291  
71.8706847571669 71.1894129030602 91.5825612510669 101.577767481269  
84.7947249929138

TSPAN5 63.4610447573417 75.2824161164996 111.735319884512  
84.0899854321388 50.3713170502557 61.1022920882065 79.5707751325986  
81.6529991377083 56.432280646473 69.9928775398776 89.8354888041611  
84.7058085717914

TSPAN6 200.41782363596 511.261925898948 241.222680673439  
58.7338159410728 129.820909990346 82.7269382676336 281.688688268815  
461.607803139448 255.884444464408 202.128650032341 251.184621899165  
241.222680673439

TSPAN7 76.9454624478854 70.5992463788381 57.423873475544  
123.138085708441 41.3387790895716 246.896984381287 43.0930293831497

61.8665316900291 43.3262148375525 129.081183929988 159.268245287939  
144.928534157065  
TSPAN8 37.4554876386402 131.67159377585 33.6816578730693  
37.8442841690502 60.9710783023013 49.5424425850549 190.27040993548  
37.1317006162938 51.4413099192899 168.522052983892 279.125471103327  
187.711309781257  
TSPAN9 1433.1813604069 758.462554576949 658.282562295783  
614.807633538557 478.799250340246 515.409979010663 401.679080975109  
784.951880532127 514.261598258395 852.769974690777 987.427672417105  
472.522115719366  
TSP0 1173.47285626656 2002.0536042686 2575.86919902296 1950.93175239958  
1533.38581753491 924.316085565917 1752.11152588494 1411.12613289991  
1891.37245670852 1513.74711975248 1607.73526966988 1459.69929955338  
TSPY1 39.1059888887285 40.5852276210998 38.2593044488288 35.8472302065546  
41.8806343997257 39.266565827316 37.8877750141557 40.2382908228517  
35.8265993915844 39.5637454855233 38.9240290061433 36.9976231206067  
TSPY2 40.0988483617359 39.6493706695391 38.0452862258803 40.6892234267786  
43.004943518025 44.9896851005259 37.830876898596 41.9315419791594  
42.1089765085639 43.844855336215 40.6723334103791 42.0709558258414  
TSPYL1 157.658760470424 242.899629257173 188.30834153268  
146.573018487871 121.259683158193 244.226756210656 139.679585117348  
176.75369241505 150.286570958507 329.677454924062 380.736562250846  
330.643531193849  
TSPYL2 68.6040407712402 70.9567983915276 68.9067462941376  
75.9837037583871 59.0590113926295 148.871702513875 66.6894494536346  
67.7189686993694 62.9126261960734 85.6170780640867 93.691983111538  
63.3819918509711  
TSPYL3 80.3142559621726 53.5434667628511 45.0985088502363  
42.6913548400127 74.3523005665671 63.2343637481705 68.3604212141462  
54.720204938924 55.4635297192076 94.8176664515469 71.9329028989527  
50.6895263967098  
TSPYL4 58.651329686676 71.1595608255838 59.9690744676539  
45.0798408927912 44.0451487108213 57.678188678075 59.5205055437765  
53.6210959113222 48.9931786790166 50.7855742231932 62.9336909080086  
47.6040671292013  
TSPYL5 59.8248482438562 268.047342640491 104.250582652805  
73.0371862899659 496.791391622565 170.682363891841 423.896735383118  
99.7445419301229 163.585662735512 178.661935292895 151.344720108793  
121.149803296368  
TSPYL6 38.957687788868 42.8542642792862 36.8730514568925  
39.6292788039793 37.5556299264699 35.9305494063137 34.6720534245631  
40.831207953647 40.5912213523345 41.3321861371202 41.0808257270221  
45.0985088502363  
TSR1 75.3761360028971 104.129763935677 99.6392844274488 72.3607760798558  
101.909225305064 120.980558571109 105.166073980781 62.0553450433433  
77.9028721785469 69.6511571901941 91.5202521578181 100.234661597218  
TSR2 203.092045210928 157.394782571468 144.515737827731 89.4504034432321  
133.050913526638 232.440458525975 213.622816589927 229.992809034971  
166.233911320677 164.287737381703 195.864827360933 244.389359320438  
TSSC1 473.688869614777 243.110664214453 173.582309251499 205.413872130332  
284.013140015092 162.151812425949 235.222472959869 365.723799716137  
291.94914449218 167.982626899395 247.843927763772 158.613823276652

|        |                  |                  |                  |                  |
|--------|------------------|------------------|------------------|------------------|
| TSSC4  | 151.652543512032 | 128.70380102034  | 114.404099081799 | 144.116701129933 |
|        | 136.736085245679 | 162.721587349434 | 161.075134901675 | 165.548537317115 |
|        | 176.02137177982  | 193.519079768562 | 170.307603160524 | 148.130140385248 |
| TSSK1B | 41.3387790895716 | 38.4330755397458 | 39.0775870687758 |                  |
|        | 43.4410741327254 | 40.148780650831  | 41.6590564937735 | 47.2927436772465 |
|        | 40.7311497914871 | 46.2027193115397 | 40.7063426028871 | 42.4580504587581 |
|        | 44.5432192783161 |                  |                  |                  |
| TSSK2  | 43.1805016690297 | 38.1312950900467 | 35.6139301508335 | 43.8002456102021 |
|        | 37.1565984182084 | 43.6670755115848 | 42.1607322031054 | 42.7431359850339 |
|        | 41.1742244762318 | 35.7202909649682 | 41.5421429082231 | 42.2577689927563 |
| TSSK3  | 41.7397731376692 | 49.9085372049438 | 45.7968648044613 | 39.853175885492  |
|        | 52.5645416722441 | 45.6129956328415 | 54.4934782594218 | 49.085741080241  |
|        | 52.1788489555942 | 58.2818491355907 | 50.5810338885769 | 54.9919060580109 |
| TSSK4  | 42.442231667357  | 39.9697332660833 | 36.178547300352  | 45.1944222548351 |
|        | 42.0709558258414 | 40.4359177791566 | 40.9157352260901 | 41.3506832276112 |
|        | 36.0741672064298 | 43.0919221375514 | 39.6403089864678 | 41.5536168238478 |
| TSSK6  | 45.4799270968969 | 45.8669209716694 | 44.2405728317107 | 47.9915414951747 |
|        | 43.004943518025  | 43.2805590023412 | 43.3262148375525 | 48.5681478665796 |
|        | 47.9035532886869 | 46.325232414659  | 47.6884372645373 | 44.4475838947656 |
| TST    | 2650.09507972593 | 1611.35913846618 | 773.781266760336 | 299.706257810523 |
|        | 1188.3486464341  | 444.618035487523 | 2150.8715161597  | 1144.34555072807 |
|        | 2083.69812106867 | 1279.02702402372 | 1615.83220398811 | 892.323580265478 |
| TSTA3  | 171.770578381558 | 238.647490689325 | 131.717764850211 | 85.1847490113446 |
|        | 159.973746908596 | 111.240804216088 | 136.461760992832 | 91.3607028449916 |
|        | 198.585368334563 | 83.2925226467532 | 84.9601800557888 | 78.1623301184313 |
| TTBK1  | 37.0320432433314 | 39.6123051184545 | 39.5450079747895 | 40.646702696033  |
|        | 40.3452320167286 | 38.2293008890613 | 42.7431359850339 | 40.831207953647  |
|        | 42.4540072551568 | 39.1621898366355 | 36.6298807161755 | 38.8495095797881 |
| TTBK2  | 37.4554876386402 | 38.0226905622357 | 43.6670755115848 | 39.1706564265495 |
|        | 35.9058393060637 | 44.0804700754786 | 48.8319884367456 | 45.1714698794331 |
|        | 37.5469247328848 | 41.2276963324981 | 41.0050831223107 | 38.8495095797881 |
| TTC1   | 231.085533860683 | 108.991044950132 | 215.15351875081  | 242.751164798133 |
|        | 162.151812425949 | 233.468474830926 | 153.436974478757 | 241.31366702947  |
|        | 190.442443946259 | 252.206029058968 | 184.377148097206 | 203.46147333933  |
| TTC12  | 65.0031119608637 | 71.4864243594056 | 57.5633736951174 | 54.4586176399381 |
|        | 54.9698568207204 | 72.0674952635945 | 58.2957814921605 | 59.0262390168156 |
|        | 56.5094373275922 | 63.2684764441521 | 62.8050945727712 | 62.9364422691302 |
| TTC13  | 88.0664425843955 | 98.3864497097481 | 109.251112569215 | 96.6610775982571 |
|        | 124.599352191013 | 77.4578596822431 | 100.975810139572 | 87.6435494489518 |
|        | 76.0709828871754 | 71.5616860050001 | 69.5715902565938 | 76.1453055441256 |
| TTC14  | 85.2893380711323 | 115.087963545095 | 132.036058401203 | 130.177232923004 |
|        | 183.393353108744 | 115.075487821396 | 87.2351169088172 | 105.414552529943 |
|        | 91.0952554578659 | 137.410781124396 | 163.16724817696  | 148.654594696193 |
| TTC15  | 535.799532339187 | 317.777971035617 | 445.644244692294 | 307.445116836976 |
|        | 457.502917254598 | 408.353336724969 | 170.327588764719 | 312.245547906683 |
|        | 321.069136463599 | 399.410299413602 | 409.312313055794 | 263.765914589758 |
| TTC16  | 55.7246872330059 | 58.1027665533767 | 65.49167373382   | 73.3725472767369 |
|        | 58.4383854340181 | 71.5249259772583 | 55.9276266345493 | 66.9340967279385 |
|        | 76.3790849853724 | 67.1278109419819 | 68.5370732645926 | 67.3183506012892 |
| TTC17  | 74.4565795414712 | 154.984589017187 | 228.907776306695 | 160.360785581153 |
|        | 118.951970882732 | 132.745388099039 | 115.229070906222 | 100.616027485975 |
|        | 98.8114094374455 | 185.72957253374  | 234.408769393378 | 166.36685654692  |

TTC18 47.6397712007919 48.0296332183129 48.4890615340603 41.7614975630362  
43.1252272136667 45.9266745571724 41.5817737564592 44.5029690493211  
51.8083208406279 59.1496467460507 57.4078217542368 49.4786466722535  
TTC19 221.015209694864 381.093521121589 314.992390390165 235.925374041038  
223.911125639211 190.940906139713 258.851412005402 400.8670859408  
225.589127792587 295.848968688724 315.139359883556 320.74875942191  
TTC21A 59.9232969481163 59.2643906275025 70.9377012403023  
46.4555908533915 80.3500323413132 56.7429967489965 76.0041771381018  
77.6174893940285 63.1944558106132 67.2811786080606 80.4239296853518  
64.7346994616044  
TTC21B 34.7597195031128 37.8685585043426 38.6727842796202  
42.0621425894624 38.2496050953547 38.3418933808844 40.8681871019812  
39.1652965788406 39.1467972692656 38.4187686307607 41.0476065156912  
42.4607795638552  
TTC22 39.0620487644635 39.2907645923217 50.6004078448405 39.9697332660833  
42.9090346219023 37.3799542961839 37.0564573649223 41.7419877611072  
40.8970401536578 40.3235655331796 33.5370783156523 36.9976231206067  
TTC23 98.2280780221631 60.9594847577747 69.8712342353417 72.6824533717231  
69.6649509377643 84.8235093165193 73.7495118153367 53.9465584609317  
83.2925226467532 130.02102880365 97.0628249915636 117.706922397135  
TTC23L 41.1523487516364 41.7337506166619 41.9666541498638  
43.4410741327254 53.8260140375214 42.8598805316863 41.5817737564592  
49.5185112777773 42.0621425894624 41.8613406887824 43.0971787292711  
43.2776458914333  
TTC24 48.0201377454632 42.5269793679335 41.785676764591 46.0228732507872  
44.9936360641969 40.8634043028528 39.7576136507593 44.9977782988116  
41.6616444147804 46.2286164776607 41.6336636285875 45.4799270968969  
TTC25 40.9558083259517 43.3458769998118 45.6989664108554 46.1673159982664  
51.940083408061 43.1826328292558 54.4934782594218 66.9340967279385  
52.7512110769042 59.2628513357357 54.5711704180349 45.3763275588341  
TTC26 62.4317959077388 60.3093790894864 57.2960245538881 58.5406981871153  
80.8238125943267 57.678188678075 67.2811786080606 104.950400251642  
89.4747568145717 57.2813205536176 55.2374601141719 59.5080588072694  
TTC27 122.495387796233 123.597489107285 121.300283654541 108.779357041421  
146.117756310709 132.684895918889 166.009268520425 207.600413958886  
133.178271848651 148.059385111127 156.69976952483 158.853244260329  
TTC28 41.0970259989281 42.7275315121163 43.0016969050339 42.6222445667107  
38.9919142475596 38.4741160538511 39.0458123429605 38.8495095797881  
44.3440839686558 39.2623423164488 41.134180463103 39.2839132447749  
TTC29 35.7012997405508 39.3999056968598 50.6987358483181 44.1483976313959  
37.0526522140242 39.7394181011603 39.6535880152834 42.9301944191913  
44.3440839686558 37.1275334308172 41.3553369544097 44.9070250604284  
TTC3 471.874412428677 452.139416552986 551.1195044975 340.370474635434  
687.862452802453 586.735744054398 512.255695437272 410.808988840343  
433.637087338002 530.314249832491 471.874412428677 481.492404948275  
TTC30A 66.9417866448504 39.6995529770239 43.1931731665131  
54.8412943008635 50.8875036861067 48.9826868640753 62.0404348860702  
80.2680308979464 50.8485682149772 52.0999467564713 49.532546810992  
48.7814131120945  
TTC30B 41.9407041937973 50.1027491117756 44.1452943804044  
37.5382094267692 46.7508829977587 39.7394181011603 53.3111230705754  
38.956280281655 41.5635499110307 40.7063426028871 43.0016969050339  
44.6484005362281

|        |                  |                  |                  |                  |
|--------|------------------|------------------|------------------|------------------|
| TTC31  | 245.811158468638 | 229.792906003602 | 258.212981181513 | 140.504336039225 |
|        | 198.360449141425 | 173.977605406146 | 135.323750661937 | 151.686513723244 |
|        | 147.758917745955 | 222.696947669812 | 210.308352532282 | 184.421617360366 |
| TTC32  | 96.1710806345503 | 67.4984616497574 | 67.1299518044849 | 77.0185859105846 |
|        | 184.938142193035 | 117.305340546242 | 102.993620677265 | 118.600699776727 |
|        | 68.4720753153522 | 65.5996869277644 | 66.0069448981947 | 88.4439480366515 |
| TTC33  | 55.4004611309636 | 47.9128504683618 | 46.3411353377615 | 63.3006977162657 |
|        | 42.7107928951766 | 58.2531879680192 | 56.9320717885002 | 53.838484549134  |
|        | 60.6706478075023 | 54.0374522273907 | 56.3106156221316 | 61.1022920882065 |
| TTC35  | 56.4553747079294 | 43.3458769998118 | 41.437237454134  | 40.3180310664156 |
|        | 42.1650127805175 | 40.1428591998404 | 40.9157352260901 | 46.3685439301234 |
|        | 46.6944238390932 | 38.957687788868  | 53.8856501960117 | 50.379587451669  |
| TTC36  | 44.1294459089314 | 43.1805016690297 | 46.7508829977587 | 47.6687908290818 |
|        | 51.0107745412152 | 44.0804700754786 | 44.4639405506967 | 41.6466169548846 |
|        | 44.0519245668737 | 45.1569741609597 | 36.7283081422707 | 43.4709415392696 |
| TTC37  | 81.3544712349691 | 90.0420794458477 | 107.637618676176 | 89.4504034432321 |
|        | 72.5027069303875 | 173.212430860273 | 70.5534237141767 | 68.2309359831273 |
|        | 90.7037473522607 | 82.6036671634626 | 89.737418965763  | 134.952392466784 |
| TTC38  | 65.5495324730507 | 85.3754356809649 | 74.3523005665671 | 78.270329450618  |
|        | 93.9069049911808 | 84.3755392205436 | 71.8466937395628 | 80.2680308979464 |
|        | 85.0162042963215 | 113.546568515215 | 141.567299023381 | 78.9701459806641 |
| TTC39A | 43.9309845324767 | 37.4540772310118 | 46.3411353377615 |                  |
|        | 41.1886975241176 | 44.2607789091176 | 42.9695585740813 | 43.6753843488695 |
|        | 40.047314525032  | 41.6616444147804 | 39.3698811593364 | 43.4709415392696 |
|        | 41.0657892043496 |                  |                  |                  |
| TTC39B | 48.7646976789783 | 48.1392888470269 | 46.8267540220952 |                  |
|        | 47.8947595316832 | 42.1650127805175 | 47.5733603903505 | 46.1634822993009 |
|        | 39.8965727231863 | 49.641159251878  | 45.5776159432079 | 46.5650556481721 |
|        | 52.6922486991742 |                  |                  |                  |
| TTC39C | 70.9419509323007 | 61.3838877877366 | 121.86893260878  |                  |
|        | 96.5813769696577 | 75.8306078651291 | 55.1987351219665 | 130.72385089567  |
|        | 159.204751627727 | 148.198469375575 | 154.707548614663 | 108.512469038407 |
|        | 119.39177524986  |                  |                  |                  |
| TTC4   | 411.254448823371 | 330.037433174255 | 333.566613571224 | 251.803102904399 |
|        | 576.367042159347 | 354.38923772101  | 359.628703006773 | 435.632247999054 |
|        | 332.184073392054 | 606.276674926567 | 438.50123471613  | 376.840175928841 |
| TTC5   | 108.649424858333 | 96.981661155293  | 104.704892803169 | 110.88526946931  |
|        | 100.774098314706 | 82.4084917533632 | 76.4889974392545 | 77.6174893940285 |
|        | 104.00520458442  | 109.844156801015 | 105.953705702398 | 79.5898953726467 |
| TTC6   | 39.266565827316  | 45.8669209716694 | 38.0452862258803 | 35.8472302065546 |
|        | 38.0598374201407 | 38.4330755397458 | 46.9929836306816 | 40.1474543172332 |
|        | 43.2761454096265 | 44.4652605017595 | 37.1059647239814 | 36.5474283500601 |
| TTC7A  | 95.042308285667  | 56.1355483199198 | 55.6865353018811 | 90.5216273844682 |
|        | 45.4751076037511 | 52.2089306840125 | 61.0979269700412 | 83.0497574039035 |
|        | 54.7966692984192 | 53.1993028936883 | 49.9338905397767 | 50.0571060701893 |
| TTC7B  | 48.1952521496489 | 42.9358255168086 | 47.5673419710251 | 53.2046867327331 |
|        | 51.940083408061  | 49.8472708021525 | 50.8388984085636 | 43.844855336215  |
|        | 54.4059109100338 | 41.9666541498638 | 51.3103617600342 | 53.2046867327331 |
| TTC8   | 88.6663961027926 | 82.5344501505114 | 94.952392592003  | 52.403135056701  |
|        | 69.6330393135101 | 80.8333046859586 | 73.6855877240541 | 59.1533197797534 |
|        | 74.5694657001572 | 79.8511759086625 | 80.2381651206227 | 84.9099930524863 |
| TTC9B  | 38.957687788868  | 48.8584917918986 | 39.9101908547397 | 56.2508140932179 |
|        | 40.9950639693255 | 56.7429967489965 | 44.2166118829877 | 42.157627240486  |
|        | 47.0804681460898 | 43.401782064778  | 44.7926323492519 | 39.6352613956998 |

TTC9C 72.0334593545916 59.8223893070578 60.379251900784 64.898351831341  
87.7337304906377 70.9514994373481 71.6354627933716 67.3976855661302  
70.0260079879579 53.0357938671646 58.0218262176065 67.4197263416701  
TTF1 103.657181265842 79.0592140403004 61.0370242377391 76.0101530264463  
66.7106881373359 93.3718038663074 107.232979387172 69.6021553604792  
79.856662992182 71.3197554517106 75.1562329744435 75.9802606133139  
TTF2 162.02498480452 271.206999109791 172.929453277107 101.560929859785  
312.923326422701 81.3978207813439 192.812519184065 153.643631245787  
243.446420243813 81.4621222177298 114.429965793669 124.628895737993  
TTK 93.5982028088194 120.60052672409 77.5718089378881 54.8412943008635  
123.800965644574 51.6053353177789 253.723909157663 192.922622120507  
112.311249826645 40.2112371512838 43.1931731665131 45.8546719310325  
TTL 109.649431670339 111.409762290528 58.4137028673494 120.679433440203  
81.929796716054 92.3477214133335 81.454335582503 121.945468001236  
80.0113001016496 104.129763935677 104.796373568883 102.655050997714  
TTLL1 45.8546719310325 44.4031868028216 45.4865173433646 39.4469765850607  
38.6454098044474 42.7093819243155 42.1607322031054 47.0239604970019  
47.798305839406 50.1314528043038 50.6822186377983 47.0867292297049  
TTLL10 41.7397731376692 37.4540772310118 35.7105247506212  
38.6414316877471 43.3332476888305 40.3357777530419 40.5585676679482  
46.1673159982664 36.8127605061228 39.2623423164488 41.0050831223107  
32.8921051249019  
TTLL11 44.1294459089314 47.2055133646385 44.696023817801  
42.4580504587581 45.6895223823001 50.0748292497578 44.2166118829877  
41.3506832276112 45.9227107476843 48.6124127998952 50.7903824729818  
51.2318935933116  
TTLL12 194.924141888391 262.153247969144 200.958421322871  
141.423857667761 231.085533860683 144.290966198687 191.291480830946  
244.736442646499 288.923207993626 241.175454742029 216.1413998895  
115.229070906222  
TTLL13 38.0089018744739 38.8336427948187 44.3344900481112  
31.1401844809132 45.2556760873335 35.7034203372528 43.8206425661746  
37.1317006162938 36.0741672064298 37.3179578037963 44.0409178714232  
40.6614700944853  
TTLL2 39.0237504776589 41.3277288245157 40.5734458834617 41.3567204694281  
43.3332476888305 41.3553369544097 42.8684958525042 38.956280281655  
38.1658452457336 39.0266821712099 40.6373400186325 39.9941474864076  
TTLL3 68.6199296680241 81.6233038764401 110.322887827889 73.7800733276454  
59.8698813493379 55.6904617926772 73.4820932957859 99.0545942554244  
69.8899273527731 116.555666104916 93.3511668018003 78.6286416672119  
TTLL4 69.4501305462809 70.3629652777935 73.6323065529916 62.3936376596431  
116.882934971483 53.565717255469 74.416117986276 49.9332280449549  
66.5298067946102 58.115198353247 54.6089451252049 56.7711602236706  
TTLL5 105.621640443267 64.1607001437806 99.3448096967314 62.1776700757427  
80.8238125943267 74.9006142438341 89.4747568145717 117.215323339475  
109.374838860558 92.9043863423147 86.582851157193 82.3254961129575  
TTLL6 41.4508241771315 37.6383530120621 45.5883690965192 40.3180310664156  
42.269054475455 43.7630587657205 40.5585676679482 47.0940613507321  
43.0930293831497 37.2089297656361 41.9908237694988 44.8372404608604  
TTLL7 56.4553747079294 44.0409178714232 49.1067959632109 46.4555908533915  
44.9936360641969 72.8472187581193 54.8074655158941 84.0899854321388  
47.9035532886869 53.8260140375214 53.2083147523758 65.6876778328592

TLL8 36.0144420013819 39.0102066700839 43.0016969050339 37.4223289687135  
41.467005949568 40.9506062495231 35.6056062164318 38.4540849632254  
45.7452456977857 35.195364621675 47.3791873993182 39.3575468494941  
TLL9 37.1485601150873 33.6902293666089 36.1042012504758 41.5464765641928  
42.9090346219023 37.1317006162938 40.6750540874299 41.3506832276112  
50.7619345314571 38.4187686307607 42.2618615571566 35.2448979801094  
TTMA 39.8234920704779 39.0102066700839 38.5045333213784 47.481302504066  
46.3607182640185 39.066284740632 44.9094465483072 42.6450179841129  
38.2874316439311 41.7405682794166 41.2598458726002 40.3316153483289  
TTN 39.7576136507593 39.8316227503824 42.0621425894624 41.8341476908826  
40.5349168203034 41.4227796216039 41.1737756350158 40.2025154948001  
43.5954714029015 42.0323356348434 42.2518289437063 40.6182024835937  
TTPA 40.148780650831 37.6786104343959 37.1188989884324 36.6501141438378  
39.9088079891223 33.6248915845234 40.3302268293707 37.0932890050788  
32.9174234020987 39.9948390976317 33.7494761745342 36.5219488315447  
TTPAL 113.767996184128 122.621100838222 144.928534157065 137.034037711549  
172.451522479253 104.415017343579 113.148617122619 165.440751113862  
132.172127966602 137.484063876244 140.78326016606 118.376686726902  
TTR 48.4849194706125 74.3729155936862 50.7502704822135 59.6153684374766  
46.7508829977587 46.8954576545929 51.0013344286851 254.756894822368  
54.5952754712007 61.1851254827343 50.4740079109854 50.8999542937724  
TTRAP 42.1537476443423 40.0145811166794 41.1742244762318 38.9074189954657  
36.2048942610546 41.408887993053 44.8643898647322 41.9315419791594  
41.0476065156912 39.9948390976317 42.170702295259 41.863927676552  
TTTTY1 40.7609952437622 35.1224289925572 38.6727842796202 37.0732977341185  
39.7568367479301 47.0027453663546 35.3362091871364 35.1738399826814  
38.8271346375425 39.0648733099061 41.6336636285875 32.8921051249019  
TTTTY10 35.7012997405508 40.7952353240579 44.3344900481112  
36.9912468186322 40.4639532172338 43.2805590023412 35.4623691645629  
46.695848687694 36.4476883897928 42.785429206422 36.8282383070068  
41.5536168238478  
TTTTY11 40.7609952437622 42.3711524005238 43.401782064778  
46.0228732507872 40.0599807618105 42.750861693377 42.629412460409  
44.797320243931 40.8420925848403 51.7983110178095 40.723990462047  
41.8200132437731  
TTTTY12 38.6454098044474 48.3699741879723 39.4710743516517  
36.1562979552173 38.8456942580061 32.4301586830653 39.2533668167483  
32.7676164492555 38.7298222155532 42.6793753550854 36.8282383070068  
37.9607839934735  
TTTTY13 41.5421429082231 43.4396866157171 40.5386195997545  
42.4580504587581 40.8873907150245 39.4512099697623 42.9803717121865  
39.8965727231863 40.7460990419215 36.9102644736882 43.0710577955487  
44.293922970134  
TTTTY14 43.9309845324767 46.8954576545929 38.9790184198145  
31.5391275257362 36.4434672195785 42.4580504587581 42.1607322031054  
35.5798430594271 38.9834959368496 49.5265949137207 53.6334631215581  
46.2625470410195  
TTTTY15 45.2875173643252 45.4882438975269 44.5134109184888  
38.8495095797881 41.5668884168669 49.3172204533818 57.2758638871082  
58.0892402609917 47.3791873993182 41.7405682794166 49.9338905397767  
51.3244198342335  
TTTTY16 40.3478825593224 43.5182502375207 42.7303139017786  
38.8495095797881 39.5595233162192 42.5660695551615 48.9826868640753

41.2551966132486 39.0775870687758 38.745552403895 41.3553369544097  
42.57175366709  
TTY17A 43.9577120438279 38.4330755397458 41.0705134231814  
45.1094678231052 40.4639532172338 41.2567470068038 38.8417151851134  
37.6557714476853 40.4997186069494 41.2665909203775 37.7882601416133  
43.5738557773903  
TTY18 42.3433931248155 37.3634897565502 39.5954353681031  
45.8844325913247 41.3755760434934 39.6609238036815 39.6535880152834  
40.3691324547049 41.9635525160083 40.8049408996274 40.6373400186325  
43.9541718254769  
TTY19 43.2135791259317 38.0834507308871 38.9790184198145  
40.4359177791566 37.7170995811297 43.1826328292558 42.2577689927563  
42.4580504587581 43.4656637536244 38.2069499294002 41.862634402486  
44.293922970134  
TTY2 42.2651653674882 40.8420925848403 41.1860481368243 41.0726336841311  
39.6535880152834 38.6690448068544 40.4359177791566 39.0620487644635  
42.6366765186182 41.7877325563821 37.7384958256497 38.7119440509409  
TTY20 35.5179217192467 39.6995529770239 40.8420925848403  
40.7481155008596 40.4639532172338 38.8336427948187 42.8684958525042  
37.0390589468421 39.853866204927 42.5664883002833 37.3687900733549  
43.9541718254769  
TTY21 41.7397731376692 41.3610369241157 42.0621425894624  
41.2551966132486 40.0599807618105 42.1046072075724 43.2721716572958  
42.8936990772838 41.2870505273664 45.2023300009435 35.3870574564807  
43.3744503319109  
TTY3 42.7150227340364 40.6380495994768 41.8751578329365 41.3027031037343  
44.8897737954573 37.3799542961839 42.4939802311136 40.7311497914871  
41.9635525160083 42.0621425894624 44.8872784170036 40.4639532172338  
TTY4 37.4554876386402 42.4493032770053 33.4240466670776 40.1804147506786  
43.004943518025 42.157627240486 37.4772922422734 38.745552403895  
38.2215591930186 37.7315666632629 40.8225507267584 42.57175366709  
TTY4C 39.6609238036815 37.7384958256497 34.9849896310235  
39.066284740632 42.4864576619427 44.1737502492846 44.7255207589606  
38.956280281655 35.9645119596869 38.528621456378 38.956280281655  
38.8495095797881  
TTY5 40.9141850646578 43.683792219729 43.9450023643394 44.6131679221578  
38.2496050953547 41.408887993053 43.2721716572958 41.4905114972525  
42.992884918158 41.8613406887824 43.3085358214154 38.8964578286293  
TTY6 35.3227485563945 39.3622375852537 46.1653991089885 40.6892234267786  
39.0564222526273 38.1699123824764 42.0605906240248 42.0494116081998  
41.4397539024976 42.3413611855132 40.8225507267584 38.195965820384  
TTY6B 40.2087556903277 43.5627649099623 40.0557788909923  
40.9085497163517 40.3452320167286 43.1826328292558 40.4359177791566  
43.2551508830106 38.6510172759977 41.0608773166058 38.8132170743603  
43.9282059368202  
TTY7 38.957687788868 39.6995529770239 44.1452943804044 44.6131679221578  
42.4864576619427 43.2805590023412 42.9803717121865 41.4061152929154  
43.3744503319109 43.6670755115848 37.1604861088456 40.0557788909923  
TTY8 46.8954576545929 43.0227387991135 38.0452862258803 34.4382958501338  
45.1137938810047 44.4619248757502 44.7255207589606 45.0972184964705  
44.0519245668737 39.1621898366355 48.9754340235127 45.3763275588341  
TTY9A 37.55264801907 40.4359177791566 42.4580504587581  
44.4367387274922 43.6587492470348 43.3785777889265 41.1507980856436



42.4580504587581 42.357910063876 42.9866214102525 34.174642681781  
42.9887069977696  
TTY9B 38.5007204246293 36.9994058279362 40.1985790927248  
40.0698728584484 40.0599807618105 40.244271403831 38.1793598983615  
37.6557714476853 41.6616444147804 39.9948390976317 39.7342718293432  
46.1592873342534  
TTYH1 46.0920218698606 49.2050538150106 40.5734458834617 38.2041059863839  
42.3685136297603 48.8744644207821 43.1602899171656 42.6913548400127  
49.1399035787209 38.5921548841176 39.4749602565407 45.3267183347084  
TTYH2 45.7356815244513 47.6914221838216 48.5361215129944 59.5573227689649  
55.7802841481067 52.3579564953125 43.3910673889849 44.9673049606589  
42.357910063876 45.2556760873335 45.0071770692626 45.9008005854819  
TTYH3 500.431738940003 256.941243394182 210.255784687052 405.852280880924  
289.213144287085 147.357697217619 173.343091136741 278.303493506139  
236.178265404264 90.9570747667407 74.280612516205 89.6670947876322  
TUB 40.6130792100165 40.0195349109823 39.4987030972173 42.8768096578102  
44.8897737954573 55.4409373780772 47.2039901393292 41.3962888656479  
40.4997186069494 51.403663660401 44.2446125027849 46.7577982595088  
TUBA1A 2150.8715161597 1683.24873205783 1450.53108586858  
1345.37091574015 1783.87583818834 1945.33618761041 2178.59848996529  
1963.91365010531 1549.93897368117 784.268074988084 1093.04440713629  
1167.25317435052  
TUBA1B 6186.45345364665 7235.0789252269 5811.22276358172  
4503.77675488367 7681.71833395626 4597.60989502097 11410.3307451176  
7476.94487791412 7911.19531717602 3166.48568397766 4015.88651424568  
4597.60989502097  
TUBA1C 3166.48568397766 4752.94498024732 3166.48568397766  
1664.00821059181 3818.71752181269 2456.86796652313 3854.42494497831  
3202.8848520816 4328.723715755 722.200727623647 1048.98028527123  
1524.01520893763  
TUBA3C 43.4626049853157 39.2907645923217 40.301483914446  
40.4359177791566 37.956732373465 39.3841861812262 35.1307934330047  
46.5717043290731 35.9645119596869 36.9102644736882 41.6336636285875  
38.5279745308203  
TUBA3D 44.8914371498528 57.3417959180493 48.0654860391912  
45.1151758109609 53.6907197364586 48.1997158668729 57.5955320223035  
61.73650350626 68.4229528414965 42.4594149893798 52.2229654768933  
46.6681271693877  
TUBA3E 45.2875173643252 41.8848959280916 46.6588655218735  
37.29566077996 38.6454098044474 50.5148383400703 44.3440839686558  
46.5717043290731 47.6195009345747 42.9866214102525 45.310660704531  
45.8546719310325  
TUBA4 40.3478825593224 33.939263369489 42.9104454767916 40.1804147506786  
36.08956004634 39.3841861812262 37.9430145836712 36.6452480995946  
38.8271346375425 33.5412189543102 39.2542963855807 34.806104801006  
TUBA4A 81.6486527718661 63.1780854659428 173.49425401442  
143.443713592074 127.093495914275 87.4239220649478 56.7780520416533  
63.1604223919703 124.156774983746 128.749209040345 136.825026294861  
132.425058995617  
TUBA8 37.55264801907 39.2907645923217 36.6522278218553 39.3750969348308  
38.3561682218911 36.4986986135769 35.8227939208521 40.4359177791566  
37.9273653326866 40.8970401536578 39.4410515050885 37.7526485343328  
TUBAL3 34.6977013306396 38.2263227947189 40.4882741869718  
41.8778873678551 43.1252272136667 42.750861693377 42.4939802311136

|         |                  |                  |                  |                  |
|---------|------------------|------------------|------------------|------------------|
|         | 44.1311654985682 | 42.6366765186182 | 77.1767494799711 | 46.0095710163378 |
|         | 48.1627097465883 |                  |                  |                  |
| TUBB    | 1950.93175239958 | 1578.32969650385 | 1176.37732422904 | 975.02086340962  |
|         | 2992.62035058532 | 1163.0370991733  | 2575.86919902296 | 954.116675685628 |
|         | 1541.9572099378  | 639.391575249793 | 601.139894733857 | 678.684833360104 |
| TUBB1   | 45.6517320730042 | 48.6447083765118 | 38.5045333213784 | 51.5913529948887 |
|         | 46.9906120932727 | 46.263826584899  | 65.0031119608637 | 48.4670130605028 |
|         | 43.0930293831497 | 42.0621425894624 | 41.9083581529276 | 43.0930293831497 |
| TUBB2A  | 80.4113521705019 | 51.5769920982698 | 43.3465699185405 |                  |
|         | 44.2166118829877 | 54.2683296643972 | 75.9713712509177 | 83.5895816521251 |
|         | 104.480361196422 | 56.5094373275922 | 47.2299678280724 | 59.1443775199516 |
|         | 65.6213260281822 |                  |                  |                  |
| TUBB2B  | 201.941251308732 | 61.9459245072385 | 73.0128142320238 |                  |
|         | 91.1834104205004 | 62.5106969730855 | 73.4820932957859 | 639.391575249793 |
|         | 743.094853186365 | 56.5094373275922 | 51.7594352155304 | 47.5439485437351 |
|         | 66.4626619269287 |                  |                  |                  |
| TUBB2C  | 1294.42501356365 | 1436.67510926345 | 682.479411898549 |                  |
|         | 409.724772942357 | 1190.10462185567 | 541.85051890123  | 1459.69929955338 |
|         | 966.803172864162 | 815.810781070699 | 488.649780652311 | 968.405745860353 |
|         | 435.901460958456 |                  |                  |                  |
| TUBB3   | 894.486674059951 | 510.525676243746 | 128.436305192918 | 175.798140574991 |
|         | 407.564154455615 | 98.403191200835  | 919.542051089664 | 458.861461526841 |
|         | 231.198764780818 | 50.1649089793069 | 52.902043370862  | 49.8253396161069 |
| TUBB4   | 49.8472708021525 | 35.2143190355414 | 41.6977706798234 | 40.1804147506786 |
|         | 82.7394574977114 | 49.4157684139858 | 37.2892641289258 | 129.925137664962 |
|         | 42.1594905198929 | 44.2580151149956 | 42.6366765186182 | 47.7962548556026 |
| TUBB4Q  | 67.6011992144113 | 75.41408189458   | 73.845912534353  |                  |
|         | 49.3654837541353 | 95.7639712596394 | 55.8243694410835 | 110.223625398261 |
|         | 95.7639712596394 | 74.220854748627  | 63.3872214856708 | 77.6653462778309 |
|         | 72.4094549259929 |                  |                  |                  |
| TUBB6   | 151.425712904293 | 78.806097512943  | 98.5746416750459 | 186.795349445177 |
|         | 78.4023698691285 | 397.154258378193 | 73.5993692960562 | 125.868437542325 |
|         | 73.3506594385504 | 120.943323740458 | 128.485596739193 | 195.836475280084 |
| TUBB8   | 44.0328992213727 | 49.9085372049438 | 40.8420925848403 | 42.4580504587581 |
|         | 40.9950639693255 | 39.4953494583071 | 51.7714254834195 | 42.5435283762933 |
|         | 46.9739160257217 | 37.6383530120621 | 42.170702295259  | 53.655233033193  |
| TUBD1   | 40.6559419616644 | 39.0102066700839 | 43.0016969050339 | 37.8442841690502 |
|         | 43.2484996523549 | 54.7083331985678 | 46.7100796279384 | 43.844855336215  |
|         | 54.1745577382276 | 49.4006068471301 | 58.5588286084726 | 46.917149434588  |
| TUBE1   | 49.1147639552724 | 51.0612189196487 | 53.0630927250439 | 49.260242314197  |
|         | 41.9842695818285 | 56.1115976952096 | 48.4859552186772 | 54.4670839756258 |
|         | 47.6582396278888 | 52.9603588177082 | 52.3304586399695 | 63.0733654065132 |
| TUBG1   | 137.309523231049 | 171.468580016846 | 246.680724959444 | 102.786429761295 |
|         | 311.810240385503 | 122.702789229752 | 221.743315748689 | 142.444971930298 |
|         | 212.00247895282  | 140.866324039667 | 149.312893905408 | 141.319488024794 |
| TUBG2   | 139.436084808369 | 134.407474121421 | 445.016226732679 | 83.4756142147167 |
|         | 192.666532389331 | 172.102568448455 | 72.5956443098684 | 83.0497574039035 |
|         | 135.361059757705 | 446.37035118289  | 386.98657211459  | 303.281551940647 |
| TUBGCP2 | 270.110273110996 | 338.475097952023 | 331.001195453225 |                  |
|         | 444.618035487523 | 304.258586051126 | 238.29247862863  | 446.902178094675 |
|         | 325.769076169162 | 276.360065404067 | 350.584135047249 | 389.994289973076 |
|         | 243.341575080264 |                  |                  |                  |
| TUBGCP3 | 48.2910530887214 | 50.543526404059  | 52.5353664902258 |                  |
|         | 45.7397504535169 | 52.5645416722441 | 51.9421032049606 | 48.6395795163502 |

43.844855336215 47.1744296124496 41.9666541498638 46.2560238004757  
 47.5025821041537  
 TUBGCP4 149.629940171074 163.16724817696 117.869393694564  
 87.2643859655159 246.924485443224 162.932479392087 208.915145509698  
 128.38299874379 204.318269745079 104.409397223301 134.994839576312  
 222.81957100654  
 TUBGCP5 80.2650269182886 58.4891791448514 85.271985416622  
 41.8778873678551 140.01041112896 67.8208976798364 59.1774824918359  
 73.2037966614621 73.3042538589134 80.6634117492762 78.1856721173896  
 58.112348043634  
 TUBGCP6 58.9695927558921 72.9700748169457 79.5779010201291  
 77.6574950328663 95.2833228196616 59.4949177415847 60.0429887370894  
 72.2120805585702 64.1724883992867 75.6691048470495 68.1992221684165  
 59.3353474684952  
 TUFM 514.70012608304 523.863193910096 906.833938613875 382.744696166534  
 1275.78715071615 390.202312411165 477.410937135204 1096.1705171588  
 1001.99175009124 555.044139654886 633.385474385877 492.902027204364  
 TUFT1 201.360008430353 223.615985483787 228.907776306695 80.8728961146267  
 261.826480747537 121.236881661832 268.419751472464 1129.19103016599  
 334.527003257901 465.981133154896 336.490083577377 330.643531193849  
 TUG1 1686.40194722823 1364.06060391538 1604.80031304031 1059.63540694644  
 1159.77262479002 858.975085087497 1601.52194699063 2506.05102956991  
 1673.60994518271 2243.24648907474 1726.90584784425 1257.19844370057  
 TULP1 42.5193208629123 40.4359177791566 46.1653991089885 39.3750969348308  
 41.467005949568 39.9397419279057 38.2933870238743 45.7476095696859  
 36.4476883897928 42.4594149893798 42.7275315121163 45.3763275588341  
 TULP2 39.5676051939342 38.7344853699576 39.9101908547397 41.3027031037343  
 40.8873907150245 39.6251842352088 40.4359177791566 38.079222289614  
 43.6670755115848 39.7835513496873 45.6348103033479 37.4554876386402  
 TULP3 90.3691010312535 61.4800543360853 69.5937318502259 56.0794100106654  
 79.8511759086625 92.1151486847283 109.255307556049 74.383456365584  
 103.349712762251 85.7732262204681 70.7760293129408 66.9239565096247  
 TULP4 147.557451530784 134.537040608687 140.226992517573 127.486023318527  
 148.255880793905 111.096799408676 92.5011103881887 84.5055910320032  
 108.589036223189 96.4072955983042 114.215602320391 102.77259665192  
 TUSC1 114.148080724618 105.997702773537 73.6323065529916 83.014860007187  
 75.4652763126449 118.49449420132 132.364260893831 67.0904616289706  
 108.019575675653 75.9037617394486 105.953705702398 86.9924799927707  
 TUSC2 73.7133884699889 81.2801740824235 84.1401040507557 76.2591822114739  
 100.645556491457 98.403191200835 80.354283778818 73.8374823243007  
 98.3798838151482 103.14577985944 98.7446830481164 80.8366627364071  
 TUSC3 61.5392012551041 189.705164944697 155.908644253547 69.1239811245312  
 179.581456201363 102.085154509866 136.629336440719 105.796515736125  
 150.114520857436 91.3418781023824 114.719721626067 163.20801480093  
 TUSC4 225.960701908311 327.984902171255 350.106705208362 272.828896268482  
 539.471011648536 282.646286144563 393.337170271481 295.69493803986  
 223.749512763927 379.635124632409 359.241360412129 265.520773157991  
 TUSC5 39.4710743516517 35.9305494063137 43.8495248991589 40.5484717678957  
 34.0045980663271 38.6414316877471 39.2533668167483 37.6557714476853  
 46.9739160257217 42.6793753550854 37.2018803984555 36.8690774823319  
 TUT1 88.9589979655541 100.671408579579 140.175068871414 87.4850071876743  
 144.976378707447 79.1922819549042 152.555556133364 94.9654919877791  
 105.71315237465 99.2432911346944 105.953705702398 73.9986015964321

TWF1 50.9381343674699 60.5713059273145 60.3155766445629 42.5193208629123  
50.5707478277575 52.9482338979681 46.0228732507872 73.4820932957859  
72.2527203451447 44.9673049606589 48.1591264215184 60.8662233098324  
TWF2 262.824698774297 585.054570630252 426.015657750123 575.863848923457  
265.520773157991 245.194730981772 632.577797921655 332.276510973163  
464.495132469257 380.015934356432 350.106705208362 255.598083334598  
TWIST1 134.743068051122 77.268323196327 55.6865353018811  
106.398825125486 100.774098314706 159.22638189198 76.3583555666815  
111.404796541459 86.3533120291957 108.39424630351 111.656567824564  
119.051596183968  
TWIST2 48.0201377454632 43.1560065801875 42.2577689927563  
49.6314545328943 41.8806343997257 60.476609295115 47.4863115975287  
42.3004033054354 43.2100129360085 51.909968572392 54.1440452292081  
52.2832912331043  
TWISTNB 68.5457752893587 56.1355483199198 45.310660704531  
58.3475983630509 97.8825824657468 80.3805507705979 67.2811786080606  
71.9771425105735 98.0473811574767 64.3383155834968 66.4251023257203  
73.845912534353  
TWSG1 261.878099018309 187.888403806895 165.190373710254 199.937572174194  
297.023913988137 310.255767356827 468.381233506231 751.150916058018  
315.696895080135 177.425508756002 173.150885069619 284.795064481553  
TXK 44.1294459089314 51.6869155634183 40.931294690669 44.6905691366696  
49.1928206164702 41.0582900711341 36.08956004634 53.1052228246467  
45.0017158586743 38.957687788868 37.9230440150891 48.4535991392809  
TXLNA 388.580556899321 452.351360652434 378.243295327368 346.621778258188  
592.010988342149 440.93348620369 516.704027135707 587.385368995676  
375.529704925121 453.652548085387 508.688028777582 424.87896140215  
TXLNB 41.6354649482853 42.8542642792862 41.6079958749402 43.4410741327254  
37.5556299264699 39.6251842352088 44.0687697278114 43.2551508830106  
38.7298222155532 39.9948390976317 43.401782064778 40.5703581862752  
TXN 1963.91365010531 1842.15643221012 1062.93431683428 2201.39729904166  
1858.94179312821 1541.9572099378 1900.96666834569 1769.18069954113  
1640.74027400791 891.080174768895 849.412637017524 2133.78836857697  
TXN2 38.5648843914189 41.9894412416874 40.4070046183108 42.0102671859606  
37.6527901109005 43.6670755115848 39.3585350448719 34.6977013306396  
38.5252456306656 35.8304004211528 42.0750889188255 39.1553169409075  
TXNDC1 294.7772562683 357.44124276077 449.701353531924  
462.362735276132 311.055487966495 312.154320305976 283.21175871127  
381.533380474563 499.744856832174 424.182335137838 404.356143472409  
486.044304392285  
TXNDC10 74.7955767483841 91.2647023876304 91.1834104205004  
87.9098670472958 68.5888253504788 98.0473811574767 50.2016912396771  
56.6910078150745 92.9388175558241 75.0665411373616 91.2202310968307  
91.8935361535002  
TXNDC11 95.4841914842335 149.284007723184 151.344720108793  
251.65044168003 86.6854406823303 101.272774711455 116.242109750054  
138.55578310538 100.294952875307 111.771533072688 127.949712300256  
108.213380368446  
TXNDC12 1618.92099084622 1325.2479053325 1217.21440297138  
969.805093523651 1601.52194699063 495.359878931451 1239.68399088145  
1071.64675274806 1433.1813604069 689.228901128857 691.94603958547  
766.647626178442  
TXNDC13 73.0186209472046 73.5834042105313 72.2339737080582  
114.174791258883 67.1278109419819 165.496075703734 78.212704825539

78.5375244257332 64.3425836997629 86.5926014007562 97.2004257862686  
95.7383730980717  
TXNDC14 351.637117984528 484.651969259966 450.271658272512  
379.280296622892 1239.68399088145 454.701322158431 484.482971152057  
570.204236909398 504.281506941044 470.004780385708 560.802447943839  
546.94113683381  
TXNDC15 62.928986708012 54.4793574349739 64.7318794662958  
85.3754356809649 56.5933259268408 69.5645254789371 43.3262148375525  
60.0835531094681 69.0037087543684 49.0841460667818 60.6505672212119  
77.4769634299218  
TXNDC16 46.0920218698606 45.0115870036541 39.991353369336  
40.5484717678957 41.8806343997257 48.3686935595826 50.6774883370457  
50.857522488428 54.113533179847 50.0564735608363 47.9942520395434  
40.4639532172338  
TXNDC17 1395.33665255999 2611.32405374107 2689.80835574654  
1254.72625904639 1917.90025587049 764.571579067138 2878.82618761804  
1416.47763911039 3296.66056024983 1670.01014610464 1991.4199819544  
2854.82112538867  
TXNDC2 41.3848620620968 42.8978721487095 44.1144663373989  
47.6687908290818 42.9775348174342 46.7293238583888 42.4550559210442  
42.8036731479932 38.5019918517688 40.4544974307172 43.0016969050339  
41.6972107715212  
TXNDC3 36.8072833828297 42.6939394537076 39.0775870687758  
54.1240583139871 36.08956004634 47.2009420656854 42.4939802311136  
41.4508241771315 34.1294694030979 46.325232414659 37.1059647239814  
34.3409660445447  
TXNDC4 45.1569741609597 45.8980298854198 45.8445073504868  
43.1275490164761 41.6340461942423 46.7800033479223 39.700936357233  
42.157627240486 45.5779686360641 50.1649089793069 49.4593570700221  
48.0080291106034  
TXNDC5 366.515210930763 492.13077103258 326.902009704746  
526.750242877914 447.579367889737 234.043251639296 152.942332679485  
158.884110481815 271.070078611015 143.773311381452 131.319040057576  
199.858233616116  
TXNDC6 37.55264801907 38.4330755397458 35.2838283525874  
33.4240466670776 37.7576900881741 31.1150868775826 41.8315602975157  
37.6557714476853 38.8271346375425 39.2623423164488 40.8225507267584  
38.2350720635382  
TXNDC8 40.148780650831 35.6434124419782 42.9104454767916  
43.8002456102021 38.5512429290626 45.7300501624017 38.5066108855005  
41.5464765641928 40.8970401536578 39.2623423164488 42.4580504587581  
50.4847465816184  
TXNDC9 77.6056319020116 74.7625228047952 67.9850517608624  
83.2925226467532 82.4164506744 61.1022920882065 75.287377665837  
79.3614922672599 78.5174639327946 70.194061829681 61.8445915808329  
69.303129494807  
TXNIP 175.125791527244 385.827237353675 1152.55315876935 678.996864855592  
150.957220787781 931.401929277001 149.691911022686 177.261319004133  
200.019523376661 949.60074350774 1225.62057881626 805.87120346756  
TXNL1 48.8333989709933 55.2182004838121 51.7138050344355 62.8201270538435  
46.3150221024046 55.0009147092272 42.9803717121865 46.3685439301234  
78.9521593412581 45.5776159432079 39.0550139257658 56.4578213622965

TXNL2 111.669813610213 214.873872837015 200.41782363596 117.282216847547  
134.152059562322 138.655669174533 134.24897875016 124.112216491975  
139.66584446954 81.0880833950735 92.0880591999243 155.287591646469  
TXNL4A 60.6441065119394 82.9449579428926 62.9967097752591  
47.0874209746031 73.5541045639348 50.7516773099639 57.8870110456492  
45.1714698794331 67.4304134449444 50.1649089793069 44.4688999098904  
49.8253396161069  
TXNL4B 60.4593810615882 42.2577689927563 43.401782064778  
48.856176220627 42.6022652963326 50.2163892855092 56.9320717885002  
61.8665316900291 52.8502823653368 54.0374522273907 50.2203578628217  
52.7530873093837  
TXNRD1 137.016387648703 119.866221751572 92.0606634977068  
295.473526251997 145.335751135441 776.670493028756 213.162949250252  
151.686513723244 166.349012388957 274.648263378054 400.416888798951  
567.393665550133  
TXNRD2 46.441301934328 50.2696827764943 57.50915811428  
58.8129577435993 41.6806984441849 57.0775902639215 55.9656969281284  
46.5717043290731 42.1191165911658 56.7602749462766 60.1837189855762  
56.410923639913  
TYK2 391.528019827951 475.008345432596 631.110081413363 565.411298018845  
875.787532301293 242.58992925232 378.626656077546 470.231929311877  
447.248719481853 414.17770012536 386.00975855841 348.123960682064  
TYMS 162.569762535436 351.883708151967 291.159547880488 114.363816429963  
266.581466060604 79.953657052127 569.074678179054 206.857208722995  
329.282615395786 53.0357938671646 58.7389869173495 103.302837652919  
TYR 43.0001432913058 38.1312950900467 43.6670755115848 45.334106390212  
44.147557390293 42.0574848021044 39.7576136507593 41.2551966132486  
35.2143190355414 41.3321861371202 37.1059647239814 47.8931773060789  
TYRO3 165.974848305379 100.02732841841 78.9701459806641 54.6089451252049  
173.838110431513 85.5027511448958 206.768099707991 245.630020408551  
110.074666148474 77.4999637278723 89.0684909049451 54.720204938924  
TYRO3P 37.9387791625384 46.5650556481721 42.4580504587581  
35.6928955245309 41.0885562160946 41.7627910693483 41.9393838138203  
48.3590401011623 38.9006788676407 38.6454098044474 40.0766543123257  
41.0657892043496  
TYROBP 884.036280777358 508.474794786176 424.539111965342  
5855.6498679729 314.091389958069 1726.90584784425 875.787532301293  
414.293172794592 99.2341244350412 213.768352764473 165.598854278557  
354.158105175308  
TYRP1 40.4639532172338 36.5219488315447 45.6989664108554 40.7481155008596  
47.0954207417646 38.2293008890613 40.4359177791566 37.9837233601316  
39.9444191873552 42.9866214102525 38.3684202018524 36.9976231206067  
TYSND1 193.395549316561 254.239142284878 297.023913988137  
106.035435807364 285.56460901579 102.926945888985 143.383133346874  
136.751431410199 625.805967352327 214.691909801388 191.896416838806  
139.142835448881  
TYW1 94.080489738662 102.150058925164 107.501868837432 84.2804410361247  
141.649461526745 133.673536028938 78.4937314423253 97.7415824971555  
114.935101645207 75.3333024462557 86.2118355769367 82.7394574977114  
TYW3 49.1868644496737 63.6966761077037 53.0630927250439 56.9299697426319  
48.7288537840562 80.0243450227647 48.3411413510851 41.5464765641928  
47.3791873993182 44.4652605017595 70.9319024596628 85.9286114777649  
U1SNRNPBP 101.211796615204 104.17651993553 108.366007746533  
85.7390214986603 69.6649509377643 76.2506268869958 114.230358276599

|         |                  |                  |                  |                  |
|---------|------------------|------------------|------------------|------------------|
|         | 77.084581342367  | 110.947379383048 | 93.8042295944812 | 98.9560329133205 |
|         | 95.6731932757489 |                  |                  |                  |
| U2AF1   | 87.9638809147835 | 146.594288395595 | 148.582198572949 | 156.833474582387 |
|         | 167.410607476565 | 190.993853866124 | 279.521995263196 | 189.489924338503 |
|         | 255.800286504974 | 124.134493738558 | 133.401306624347 | 113.917429432477 |
| U2AF1L2 | 179.040571908629 | 160.303575545559 | 133.163926420863 |                  |
|         | 134.952392466784 | 85.4420599474339 | 265.667557678228 | 290.316757790733 |
|         | 199.123340814127 | 189.489924338503 | 205.672652429972 | 252.313870846326 |
|         | 212.436948565474 |                  |                  |                  |
| U2AF1L4 | 66.8129352840907 | 62.4267404482092 | 81.4367600457584 |                  |
|         | 70.9567983915276 | 70.8749669449099 | 77.9085946827079 | 60.0981687048269 |
|         | 61.6084234634424 | 91.6033269431304 | 82.9191817146388 | 79.2824265044758 |
|         | 67.0636485288398 |                  |                  |                  |
| U2AF2   | 280.075938355178 | 499.356036793973 | 257.948490663615 | 298.252355588344 |
|         | 539.188951045594 | 298.420882349382 | 455.223217772744 | 377.491895827114 |
|         | 653.880422442079 | 311.901423694475 | 382.312820492386 | 321.359569119182 |
| UACA    | 45.039075581593  | 43.683792219729  | 45.4690184557843 | 43.26160898693   |
|         | 44.6834648302383 | 45.4507786740825 | 41.1818632392526 | 40.8873907150245 |
|         | 40.137818555383  | 41.7877325563821 | 45.6895223823001 | 43.9309845324767 |
| UAP1    | 113.218291314173 | 74.3729155936862 | 66.288032400574  | 81.1189042503645 |
|         | 76.3790849853724 | 251.210603834628 | 60.7992483126292 | 86.0944261788554 |
|         | 78.8250642061439 | 88.2056147099779 | 93.5982028088194 | 205.876395674271 |
| UAP1L1  | 149.386774957393 | 94.8036856848998 | 74.7625228047952 |                  |
|         | 211.227389226633 | 61.3077641493507 | 76.889690218685  | 85.3227908896318 |
|         | 63.8008894786105 | 63.955655956484  | 67.6169355376864 | 65.088713927995  |
|         | 64.1607001437806 |                  |                  |                  |
| UBA2    | 35.4287975493553 | 46.2286164776607 | 35.2101597814352 | 40.8681871019812 |
|         | 45.8051846088552 | 47.9503724044453 | 43.0930293831497 | 44.293922970134  |
|         | 55.9423752286714 | 40.6022003765153 | 38.1835938174625 | 46.3411353377615 |
| UBA3    | 96.8783070574131 | 195.168348967505 | 120.123385036416 | 127.225812893692 |
|         | 164.813928846511 | 166.168385855406 | 129.538159906075 | 77.0262811825953 |
|         | 130.184962393833 | 62.6984594468418 | 75.3969721155153 | 159.506157112627 |
| UBA52   | 4381.51418239047 | 5566.52516420571 | 5855.6498679729  | 4427.89837060471 |
|         | 7980.71309230447 | 5566.52516420571 | 4381.51418239047 | 4916.82166008511 |
|         | 6134.89208517976 | 6027.02412617194 | 6413.42384145372 | 5932.92478996609 |
| UBA6    | 110.609133094021 | 80.173718023183  | 98.2581979415778 | 83.2925226467532 |
|         | 70.6903168772326 | 62.9688525319822 | 79.3861418060845 | 116.434267173815 |
|         | 110.757899996422 | 95.7125018118399 | 80.4239296853518 | 95.614885914917  |
| UBA7    | 139.191263237202 | 273.645674189546 | 263.21493129287  | 190.960237766104 |
|         | 153.405734390061 | 159.554916039519 | 226.090904721424 | 161.283979969295 |
|         | 170.150808455621 | 409.811889288372 | 328.295200683554 | 268.808342880355 |
| UBAC1   | 741.908952472992 | 601.139894733857 | 374.167501183341 | 552.162906190653 |
|         | 812.386878774445 | 735.751447981069 | 875.139073253298 | 378.12777235743  |
|         | 609.520481504834 | 721.266942608349 | 607.431621448599 | 573.394745674984 |
| UBAC2   | 243.015896514493 | 160.586001103533 | 180.663636520073 | 159.248015095017 |
|         | 177.111143479957 | 135.644934816665 | 249.704644191338 | 172.221482103025 |
|         | 201.530434441408 | 192.058030454066 | 202.983984966874 | 178.249889756228 |
| UBAP1   | 350.278532614563 | 301.025314855652 | 140.175068871414 | 500.549865625701 |
|         | 221.808325312905 | 395.875593488613 | 335.736886256621 | 260.232090974645 |
|         | 244.907057340556 | 246.044674996861 | 241.08817915181  | 273.108672916862 |
| UBAP2   | 88.0186381834147 | 70.4233710555202 | 71.5484567134601 | 57.2856683017619 |
|         | 73.5541045639348 | 58.3387916574158 | 74.9059650336395 | 62.105802634526  |
|         | 69.0037087543684 | 64.8549209064366 | 71.4414688202373 | 67.5047089908724 |

UBAP2L 279.226221967169 182.80711310964 270.756849919679  
 161.870972980732 279.448591201269 243.110664214453 173.819948756127  
 272.828896268482 206.989423961124 120.274848052394 256.364301298918  
 258.913621521866  
 UBASH3A 39.9697332660833 47.4076235350059 45.2640606138546  
 45.1151758109609 39.1650142708257 35.8688968812112 41.7614975630362  
 41.5464765641928 40.9901805728485 41.3321861371202 43.4424616940528  
 43.4290452504928  
 UBB 1493.20520979227 4128.92158369026 3749.78281766196 2755.23573327276  
 3088.44063817936 3421.24021192326 3749.78281766196 2650.09507972593  
 3379.67054115975 2903.00880209344 3153.71394627237 3490.63949257581  
 UBC 9060.10165509099 7323.77427153966 6938.87250165681 7127.13565491501  
 4986.44888767011 8827.37298329149 6749.14636741447 7323.77427153966  
 8144.52133665388 5218.25814076207 6938.87250165681 6027.02412617194  
 UBD 137.52864596636 104.964345794911 100.824660338235 251.268123356533  
 52.0583273941813 52.4351670989268 63.3924515518667 167.943170737481  
 54.1745577382276 49.1928206164702 50.0303076717704 44.3521099857368  
 UBE1 487.540800793233 471.046851874447 506.173054520807 518.527535205975  
 364.628602969366 435.901460958456 899.223276238109 841.316771679857  
 662.041552795049 557.979646421047 662.041552795049 439.106576928682  
 UBE1C 47.1962846565261 54.5374188496807 50.1860191642359 43.1847628331565  
 47.3172462673426 42.4580504587581 49.1067959632109 51.7538628098347  
 48.3119523820103 47.611018474151 46.6442692119997 47.0130468198828  
 UBE1DC1 52.0663533163337 57.5507765660772 60.4492532011622  
 54.5027833453824 66.4047895961325 55.2776978524578 45.6782637989541  
 50.1833483241864 54.7033747046992 53.1182952086284 52.1438110171932  
 65.49167373382  
 UBE2A 220.398778650109 256.766675299448 260.581111456578 262.865950409375  
 277.014526407597 227.535855856645 246.771126452577 292.600202149564  
 269.857104259782 121.149803296368 120.771048750176 222.16475904496  
 UBE2B 43.7585538437696 50.0425298550559 42.0621425894624 56.0794100106654  
 43.2484996523549 62.3497263884167 40.2154497375715 36.0306975524309  
 48.0163377492228 46.325232414659 53.0798381965427 52.9609836781499  
 UBE2C 286.68367978144 449.701353531924 192.264432082651 83.955786676926  
 560.413725186282 107.971806573919 789.511653564341 529.650395907046  
 451.603052501528 45.7424985641244 45.2759158146116 51.1925736240488  
 UBE2CBP 44.4639405506967 51.3800036046133 48.0654860391912  
 50.7046706880325 46.6397391251762 49.7149784386993 46.6267962186599  
 46.2779564481158 49.5539622682049 50.0564735608363 51.6869155634183  
 51.4968903591058  
 UBE2D1 35.2267149016596 46.4385386401326 38.6005272730664  
 45.0798408927912 42.3685136297603 41.6590564937735 40.4359177791566  
 40.931294690669 46.0106098064475 48.4890615340603 34.4716904283753  
 38.5279745308203  
 UBE2D2 58.4394991753791 52.4554584270038 52.2832912331043  
 57.7057442885013 55.0031529299037 72.3095457386378 64.4736987797413  
 62.5861902146526 61.6353280670242 68.7342341724306 57.6684494624163  
 69.3645322033576  
 UBE2D3 384.080719411412 616.265771322835 624.097858948785  
 821.922096305069 406.964801954621 623.574706535278 450.008356194664  
 410.058119360034 493.322302312578 368.246708866999 348.964065997095  
 633.385474385877  
 UBE2D4 133.981674663494 163.946447772618 111.227016020927  
 118.651855622915 170.780021121783 258.657801126493 111.202737864873



78.0020909283414 146.249568587351 155.01005229951 163.971002049561  
193.951097560903  
UBE2E1 293.040690378216 456.467726693355 256.55408314817  
394.990145259101 530.996217072759 335.330937634207 503.529187388654  
242.282363793567 298.200087139598 447.448900931272 313.115027781064  
547.442608452594  
UBE2E2 206.649471678786 136.947616119439 156.65747550889  
318.995164994001 103.968071466212 477.924466983414 108.263706890599  
96.5813769696577 47.9035532886869 207.087723777954 218.19156738004  
225.201522281399  
UBE2E3 101.888001006345 150.011814577972 135.829530518199  
93.8361140725228 259.332340491331 109.062415049404 109.23113111292  
90.5603308057889 146.737709403779 109.456162739433 114.039396407323  
129.268600210689  
UBE2F 586.281182112872 457.502917254598 441.872082665398 697.57030127315  
234.585571442269 483.000434270291 500.241231327789 482.5816387921  
435.901460958456 309.39599482851 344.985739524681 437.84407370064  
UBE2G1 180.916465721523 197.540681021755 197.52820443061  
141.206849814363 162.049698241573 177.757247913754 157.219840854561  
94.339011229577 158.25602438933 141.266956686625 140.610918488396  
186.301404367238  
UBE2G2 143.084029849218 159.554916039519 181.738902391483  
144.290966198687 346.621778258188 246.151211515664 151.36347984261  
162.181462827314 154.633672616367 178.661935292895 225.35760689842  
212.250918463598  
UBE2H 69.2787430208317 71.7533140056576 60.4347860127923 55.5276281380084  
70.1238785863433 54.1440452292081 62.4317959077388 53.7743801734343  
82.2694707335812 43.2438688757519 54.1963147679251 63.5295088521896  
UBE2I 341.078728185917 352.768184657577 456.992521713593 288.687391623935  
349.90835241442 253.683753201667 370.41288705812 178.060342847557  
334.813163079302 226.804294585045 227.843903680287 281.016474354764  
UBE2J1 113.298540312696 218.165286111397 145.607100979838  
548.815225941887 80.428712610358 188.485585236576 170.327588764719  
157.856158440506 114.617965877564 134.749803376372 111.186223357396  
134.697808298417  
UBE2J2 52.6364613846829 53.3683962805281 48.3847843498476  
46.9919960628953 55.3587792891042 49.2901038327894 60.6237094449088  
50.1833483241864 59.8637181111098 49.6203214143464 51.6869155634183  
50.0067996259628  
UBE2L3 164.642060754649 115.894467332637 92.1344252011599  
105.790224260281 131.156876010639 144.711001798454 135.454168096854  
75.0873720488265 151.740176274202 147.033637977077 147.984202904994  
140.961217055867  
UBE2L6 348.123960682064 419.182443507848 390.331295238889  
484.567462838523 168.640033281185 307.656792056993 402.571146447946  
406.33528162722 2167.91218703382 220.766843166754 265.026710493466  
274.134201700259  
UBE2M 458.47341225284 911.661341702443 902.691776563423 773.781266760336  
1591.51486001004 1019.67015337432 1055.00793806075 743.094853186365  
1413.36279821142 991.030769586473 909.08582922255 646.791777335656  
UBE2MP1 40.9999112795884 40.9731067463382 39.8669424994203  
39.6292788039793 42.2510526338368 35.6561235063937 40.8617699346501  
41.9721968713295 45.1432412071268 36.3032562237331 39.0775870687758  
37.6132753723512

|        |                  |                  |                  |                  |
|--------|------------------|------------------|------------------|------------------|
| UBE2N  | 227.791956085471 | 469.553640187203 | 303.189681281366 | 272.545033107746 |
|        | 329.72032366183  | 380.988918630713 | 364.141443387516 | 218.868344683409 |
|        | 411.73316510051  | 261.929727465462 | 292.93036571522  | 360.668308246913 |
| UBE2NL | 39.5676051939342 | 41.7337506166619 | 41.2365089689635 |                  |
|        | 40.4359177791566 | 38.0598374201407 | 42.6575535390785 | 35.4623691645629 |
|        | 35.4526946152955 | 43.4656637536244 | 36.6893251782922 | 37.4642807402741 |
|        | 35.8429598823818 |                  |                  |                  |
| UBE2O  | 100.586064920239 | 112.629600281653 | 111.227016020927 | 88.1494891612632 |
|        | 131.365512154718 | 80.5478617156852 | 125.184689092836 | 106.78552222475  |
|        | 100.389686642657 | 83.877343750194  | 108.779357041421 | 84.7947249929138 |
| UBE2Q1 | 188.485585236576 | 198.652987129375 | 107.971806573919 |                  |
|        | 132.604567913122 | 179.874652000664 | 108.493693862509 | 142.03031230486  |
|        | 100.813818453306 | 135.361059757705 | 164.021467900956 | 142.192315159235 |
|        | 124.791747507205 |                  |                  |                  |
| UBE2Q2 | 207.710354513208 | 158.091115152384 | 119.124583755587 |                  |
|        | 263.587821561589 | 147.704325041249 | 327.024556075244 | 195.512986297442 |
|        | 199.937572174194 | 178.123995338196 | 282.646286144563 | 221.450737998571 |
|        | 323.515041493836 |                  |                  |                  |
| UBE2R2 | 33.8558232866797 | 40.4359177791566 | 36.769073068743  |                  |
|        | 38.4208429103799 | 37.1565984182084 | 47.7556758818053 | 38.8417151851134 |
|        | 33.6816578730693 | 42.1594905198929 | 42.1622837416589 | 37.4642807402741 |
|        | 43.4709415392696 |                  |                  |                  |
| UBE2S  | 36.4564050256915 | 40.5400384479766 | 35.0970060242246 | 37.4223289687135 |
|        | 39.7568367479301 | 40.3357777530419 | 48.4859552186772 | 38.745552403895  |
|        | 39.6609238036815 | 41.9666541498638 | 39.0550139257658 | 37.8490162439785 |
| UBE2T  | 217.721787448311 | 126.115065200084 | 115.962193866339 | 69.8314582428552 |
|        | 159.973746908596 | 69.7677752398541 | 229.26498093497  | 208.897032780128 |
|        | 202.578421978121 | 52.4351670989268 | 53.4088637045445 | 76.1453055441256 |
| UBE2U  | 43.2724556187214 | 43.0971787292711 | 43.8495248991589 | 48.309866878365  |
|        | 53.0419743379342 | 48.3686935595826 | 42.629412460409  | 44.1311654985682 |
|        | 49.3780606970538 | 48.2596564318071 | 43.844855336215  | 45.7562276914441 |
| UBE2V1 | 45.1569741609597 | 42.6022652963326 | 43.7020218150874 |                  |
|        | 42.0598144050257 | 45.1137938810047 | 41.1201550367451 | 41.4417765092034 |
|        | 46.0043807840705 | 43.4325030956255 | 42.0621425894624 | 41.2324382727265 |
|        | 43.0227387991135 |                  |                  |                  |
| UBE2V2 | 144.609635554528 | 191.955732544426 | 143.461122605294 |                  |
|        | 174.685146336531 | 206.899594905509 | 226.719775835218 | 148.178364767218 |
|        | 160.638833695464 | 280.275836993258 | 126.897002134472 | 139.45393201022  |
|        | 201.941251308732 |                  |                  |                  |
| UBE2W  | 66.979105340228  | 73.2364546716324 | 63.955655956484  | 75.2475238554276 |
|        | 62.8885806455128 | 111.845105854608 | 57.1070449050465 | 56.9621724830201 |
|        | 66.4900180648559 | 59.2628513357357 | 60.0765286625112 | 72.7987593815919 |
| UBE2Z  | 95.7194132679937 | 83.6610321130843 | 78.5325880060762 | 92.6230008876347 |
|        | 80.2979179444897 | 72.2544131004774 | 81.0331497830643 | 87.3634135323569 |
|        | 94.5186910848217 | 85.9910479975356 | 76.4796910268368 | 76.4889974392545 |
| UBE3A  | 232.628747594691 | 210.308352532282 | 115.132600341395 | 173.236617176892 |
|        | 209.89649461562  | 261.421333472097 | 202.708232693973 | 212.187855950414 |
|        | 185.658246392943 | 294.220232101389 | 251.374750265492 | 239.385229462309 |
| UBE3B  | 53.1309801459151 | 59.6359245937831 | 53.9612654850046 | 43.3078542962968 |
|        | 67.3568864741196 | 56.7429967489965 | 63.7721358300879 | 48.7814131120945 |
|        | 65.0217598379984 | 63.5107036952143 | 74.4379676234684 | 48.7814131120945 |
| UBE3C  | 293.944796522337 | 404.524605612471 | 288.923207993626 | 199.349867699158 |
|        | 414.794323433931 | 296.664472126617 | 277.284338888467 | 215.504612948048 |
|        | 376.453560620912 | 264.407051461506 | 343.262403838579 | 316.831358204198 |

|        |                  |                  |                  |                  |
|--------|------------------|------------------|------------------|------------------|
| UBE4A  | 119.095094052197 | 101.192523227755 | 89.9650488563894 | 113.248260252658 |
|        | 93.4726264307041 | 78.5276518966943 | 109.615289274998 | 150.829277770546 |
|        | 111.643323610073 | 141.649461526745 | 103.63788330957  | 107.276913085701 |
| UBE4B  | 101.688066199665 | 111.071209057746 | 109.251112569215 | 76.6232527679845 |
|        | 88.1199908664065 | 132.985150338484 | 100.499763255098 | 84.5055910320032 |
|        | 89.4747568145717 | 153.42135363926  | 119.355990535521 | 126.115065200084 |
| UBFD1  | 101.935321521672 | 64.5845827915699 | 77.4246856935596 | 99.0647786948132 |
|        | 91.1057573288203 | 81.0880833950735 | 82.1144251872199 | 129.810477623628 |
|        | 71.9062462001972 | 65.429256309049  | 68.878562323012  | 86.9924799927707 |
| UBIAD1 | 88.9589979655541 | 86.1055862202537 | 73.1262465119304 |                  |
|        | 68.9937449813561 | 150.011814577972 | 72.9154861179393 | 67.1926218405833 |
|        | 140.288771064502 | 76.7820250461545 | 73.0394191668858 | 61.7191344476295 |
|        | 82.1365334012643 |                  |                  |                  |
| UBL3   | 151.175959542368 | 158.806855832703 | 305.786520619504 | 323.705254926762 |
|        | 153.405734390061 | 391.187784616808 | 180.288784077653 | 281.906398109158 |
|        | 168.883366756191 | 342.923254301057 | 298.988745247509 | 295.473526251997 |
| UBL4A  | 156.088284999883 | 112.02980664709  | 129.609377870182 | 108.486774731927 |
|        | 232.193215437232 | 175.876518898179 | 178.608544676872 | 149.515611848932 |
|        | 159.973746908596 | 189.289063944393 | 158.590601962928 | 166.511915820497 |
| UBL4B  | 38.385865183581  | 37.2810767789306 | 33.9435456570176 | 39.853175885492  |
|        | 30.6242215267208 | 41.7627910693483 | 38.1793598983615 | 39.853866204927  |
|        | 35.2143190355414 | 37.0320432433314 | 38.8507804383261 | 37.0953622406687 |
| UBL5   | 175.193752938517 | 141.396509967298 | 168.883366756191 | 195.018775118528 |
|        | 208.67074469962  | 163.048439401341 | 145.72829095462  | 210.958578914607 |
|        | 169.75692324104  | 132.449486271581 | 119.101201684362 | 263.44529683749  |
| UBL7   | 75.3174199658042 | 87.0685571351947 | 61.4800543360853 | 91.1834104205004 |
|        | 86.1633564934019 | 84.9601800557888 | 100.650129064849 | 75.4272782742534 |
|        | 83.5646728968172 | 86.4114854104675 | 87.6689055777294 | 82.0124493733776 |
| UBLCP1 | 114.796237914478 | 85.2893380711323 | 114.84900130932  |                  |
|        | 160.187478921145 | 98.5447123398675 | 98.9560329133205 | 67.5206810636627 |
|        | 89.3868257841517 | 113.218291314173 | 109.654559065946 | 111.656567824564 |
|        | 139.142835448881 |                  |                  |                  |
| UBN1   | 235.222472959869 | 222.368324930003 | 242.899629257173 | 228.439524702578 |
|        | 205.672652429972 | 163.261867589623 | 192.003788858976 | 136.504157082236 |
|        | 204.992039590717 | 172.574996256912 | 156.08027400493  | 179.897685693038 |
| UBOX5  | 50.4260283682427 | 49.6841415268611 | 45.9227107476843 | 46.0228732507872 |
|        | 52.5120528339416 | 53.2046867327331 | 48.260931742163  | 46.6384636367629 |
|        | 47.7644661363247 | 46.7646877499666 | 51.0492389286271 | 46.1592873342534 |
| UBP1   | 252.313870846326 | 353.463970335835 | 372.131471268346 | 274.689780722548 |
|        | 595.790464730847 | 341.206585871289 | 323.374628445744 | 698.105755081829 |
|        | 454.02808608679  | 431.353025968649 | 394.437597863822 | 357.800871454252 |
| UBQLN1 | 264.786938886338 | 220.398778650109 | 138.436822676252 |                  |
|        | 246.680724959444 | 158.66112269515  | 204.710892826638 | 243.609178976074 |
|        | 223.911125639211 | 203.109765192983 | 208.878921620914 | 208.097209050425 |
|        | 305.399644617845 |                  |                  |                  |
| UBQLN2 | 304.33749254654  | 577.993850127555 | 397.520960156896 |                  |
|        | 348.551545320445 | 285.053017606956 | 323.295794446334 | 545.514314651238 |
|        | 496.791391622565 | 477.023373302787 | 386.271174243357 | 358.498678171092 |
|        | 420.761600667193 |                  |                  |                  |
| UBQLN3 | 55.7246872330059 | 49.2050538150106 | 48.1331309338997 |                  |
|        | 48.4916117779992 | 45.1137938810047 | 47.4699236780425 | 44.3440839686558 |
|        | 50.628152951493  | 51.1055541075029 | 48.6124127998952 | 51.3103617600342 |
|        | 47.7962548556026 |                  |                  |                  |

UBQLN4 682.479411898549 443.269396125834 814.643009598624  
 296.080833914967 1067.08316477623 373.46798029115 602.441843384617  
 639.391575249793 629.763102939071 575.863848923457 526.750242877914  
 539.32996290794  
 UBQLNL 43.0001432913058 46.3635803515159 78.0013795192762  
 44.4367387274922 43.6587492470348 48.5835484742456 60.5125774827425  
 60.6706478075023 47.4699236780425 68.4137459386155 63.664265793911  
 63.1443731864055  
 UBR1 65.1424206085551 60.7495043977707 54.0536858212253 87.4850071876743  
 68.5888253504788 63.6894484284172 59.1774824918359 73.8374823243007  
 63.785471218558 57.165971310746 55.4694986901287 56.8534370691413  
 UBR2 188.042978085327 129.722486794942 175.056828374791 193.094756585577  
 137.720182545143 147.151416108234 105.247736284747 149.629940171074  
 111.096799408676 139.814194128548 122.316617618658 134.489077146096  
 UBR4 419.993482471924 390.834121304799 455.444228161475 481.492404948275  
 417.331253559307 606.276674926567 368.390023942835 547.442608452594  
 439.558287621096 510.675912282067 604.951648398924 599.670771796585  
 UBR5 202.795613942391 157.493875535302 113.892432984334 119.833821068193  
 179.874652000664 148.529482776555 117.072965367702 109.573199664599  
 216.526205739151 164.709142211696 147.984202904994 144.034489386072  
 UBR7 72.1408243034509 61.5635554619635 73.4447529556358 77.720889005668  
 66.8733921725051 91.5370872909881 72.1955435994725 56.6156773678976  
 99.1565755621214 69.6511571901941 76.6571453659046 77.6056319020116  
 UBTD1 174.263925108623 166.317689650501 165.992057520727 231.824347524066  
 138.170787392253 133.163926420863 105.945216149549 102.24202987437  
 127.345094323724 124.064628168507 123.368987753537 109.398472684587  
 UBTD2 62.900814964804 51.5769920982698 57.9279989359711 54.9919060580109  
 63.5932443357808 63.4610447573417 50.3519150282938 48.9506249339673  
 59.6700171760426 50.8388984085636 53.0177144132449 64.4156641487994  
 UBTF 64.546412747238 54.495676004738 56.6303547065929 53.4604353973381  
 56.4978377936863 60.1591647295056 59.7961440557352 65.9900865113645  
 64.2848885182563 71.5310145096355 69.4418805893822 56.5715090634345  
 UBXD6 38.5007204246293 45.5842286511645 44.8872784170036 39.5050383901884  
 46.0043807840705 50.4022543872993 37.2892641289258 40.6171774724171  
 48.3119523820103 48.3693338695392 47.7535797917441 45.9693232070002  
 UBXD7 40.148780650831 40.8880530359822 40.4882741869718 38.0958223740111  
 43.6587492470348 41.7627910693483 41.3594868055879 42.4580504587581  
 47.27543600687 48.2596564318071 44.0409178714232 41.9430737035925  
 UBXN1 456.467726693355 539.471011648536 649.487838020327 624.51670158046  
 639.778130093087 806.827205415602 695.684209526222 865.63777294494  
 535.313561995599 983.972164685474 958.473187253938 635.906934423716  
 UBXN10 60.2547250212462 46.5650556481721 52.7005092555102  
 55.8709511400674 58.4383854340181 57.1752846228778 48.4859552186772  
 60.7942162859036 56.8622704143595 60.9905272201951 57.115361349315  
 53.7442594289333  
 UBXN11 58.7404123614695 61.7865043876727 55.6119508705485  
 77.1317865202676 77.2608629053098 57.9351883195149 82.7229468743536  
 81.3364476638024 60.3093790894864 62.8635815439291 61.7865043876727  
 51.1106467346752  
 UBXN2A 231.859167242606 149.59360999995 199.264520680174  
 130.379966531543 142.389246750828 162.513675180449 280.870472307893  
 294.296266023705 248.691595276298 214.562221385406 164.642060754649  
 206.559526386642

|         |                  |                  |                  |                  |
|---------|------------------|------------------|------------------|------------------|
| UBXN4   | 757.257495810249 | 966.803172864162 | 759.94822128584  | 653.880422442079 |
|         | 701.551782736435 | 549.117045813593 | 712.80113322987  | 768.354209323884 |
|         | 730.168814097451 | 732.454837219705 | 629.763102939071 | 829.152040996817 |
| UBXN6   | 237.864776225441 | 298.089522641269 | 346.621778258188 | 223.826005691932 |
|         | 310.763904671301 | 371.167168940365 | 266.9457657143   | 297.404152949522 |
|         | 328.721532812392 | 407.336051853854 | 391.528019827951 | 294.372319595103 |
| UBXN7   | 39.4710743516517 | 45.4882438975269 | 48.0191002461099 | 43.5627649099623 |
|         | 43.9450023643394 | 48.260931742163  | 51.0013344286851 | 44.293922970134  |
|         | 47.0804681460898 | 42.785429206422  | 41.3553369544097 | 45.4799270968969 |
| UCHL1   | 55.3153799233744 | 39.8695929627783 | 38.9790184198145 | 86.0630164348952 |
|         | 44.5668141895992 | 96.7474444319428 | 70.8835636550472 | 56.2441895183416 |
|         | 42.992884918158  | 75.4392126686957 | 69.3645322033576 | 64.2769859135548 |
| UCHL3   | 223.826005691932 | 356.948763043851 | 450.008356194664 | 248.599530435666 |
|         | 399.027079798213 | 282.262229126907 | 287.981727851442 | 257.80636663638  |
|         | 325.363156416947 | 167.678403380953 | 175.529493306927 | 304.777565078155 |
| UCHL5   | 99.1565755621214 | 159.268245287939 | 136.913434348036 | 137.955007835039 |
|         | 169.561107057293 | 127.789065386943 | 157.843337785472 | 120.660602388292 |
|         | 147.165235402905 | 80.3915591207869 | 85.3930226794591 | 156.53223142598  |
| UCHL5IP | 213.380798420955 | 126.088821850066 | 124.605379715077 |                  |
|         | 160.499410146402 | 340.962490240304 | 168.492959515167 | 194.355765743782 |
|         | 262.9072085191   | 146.196470375622 | 150.262748333939 | 161.890859629246 |
|         | 125.62281563325  |                  |                  |                  |
| UCK1    | 57.0006212637829 | 52.8796369426118 | 53.5698357689852 | 63.6334154351075 |
|         | 56.0477607422828 | 71.6050174762551 | 77.9028721785469 | 50.7364620410977 |
|         | 56.9320717885002 | 56.9463858443402 | 58.4816190076338 | 54.9919060580109 |
| UCK2    | 243.015896514493 | 192.43245357593  | 219.431561967403 | 202.081933301612 |
|         | 661.880230068693 | 181.950503247343 | 345.615640348066 | 216.03402309102  |
|         | 215.504612948048 | 101.693848821246 | 124.350816245276 | 180.255771684507 |
| UCKL1   | 422.931891494195 | 785.79878416775  | 508.474794786176 | 273.460165751162 |
|         | 521.546082699431 | 386.170232791927 | 691.132727131746 | 450.759762047652 |
|         | 430.283061862756 | 408.080620074472 | 517.216393517181 | 349.030389220324 |
| UCN     | 44.5798743103596 | 38.6704566269103 | 47.8263530599296 | 42.0102671859606 |
|         | 42.2455707947223 | 45.5758521267508 | 40.4941260038116 | 42.7431359850339 |
|         | 44.0256815382334 | 42.7275315121163 | 49.2879849674517 | 43.9282059368202 |
| UCN2    | 40.4639532172338 | 55.4106986624448 | 161.38599012777  | 52.6947911480086 |
|         | 42.4864576619427 | 33.895835691032  | 41.8315602975157 | 44.797320243931  |
|         | 63.4531374125233 | 35.4990901121893 | 35.4386677371439 | 34.2141875904985 |
| UCN3    | 37.7384958256497 | 40.4359177791566 | 47.0940613507321 | 37.4223289687135 |
|         | 41.9842695818285 | 39.6251842352088 | 41.9393838138203 | 38.2782436497441 |
|         | 40.2274522635576 | 41.0057887014368 | 41.9083581529276 | 36.8690774823319 |
| UCP1    | 46.3390850717989 | 43.5873188565519 | 39.0775870687758 | 51.3851157261451 |
|         | 47.9128504683618 | 41.6590564937735 | 128.256151920468 | 44.797320243931  |
|         | 43.2761454096265 | 39.0648733099061 | 44.1148826235374 | 38.0452862258803 |
| UCP2    | 178.789064142469 | 179.767874494671 | 158.321459945365 | 532.981045084589 |
|         | 131.632115558243 | 173.977605406146 | 1347.15664445545 | 756.801598119483 |
|         | 402.794855141389 | 175.441884261362 | 353.213447404132 | 235.33716196909  |
| UCP3    | 43.3638918705225 | 42.1257888816374 | 39.7840818430159 | 43.0001432913058 |
|         | 39.4693871570028 | 40.7118677686149 | 42.2143023923639 | 42.985929467107  |
|         | 46.9022898759811 | 38.3548158963731 | 41.1367478979484 | 44.9645354363967 |
| UCRC    | 110.785049776763 | 126.528654651607 | 115.735359157053 | 110.345465371645 |
|         | 145.676955166566 | 125.559679916646 | 188.156490868789 | 98.7215951303498 |
|         | 191.955732544426 | 110.440072569721 | 121.668011907792 | 144.250839367023 |

UEVLD 47.1216490839161 57.4054069675016 55.8243694410835 45.7397504535169  
46.9906120932727 52.7920121594624 45.0283997415478 45.8669209716694  
49.3301895737501 38.4187686307607 50.3876754565799 54.9169289331775  
UFC1 748.372940917543 657.59007878546 949.923102632043 576.830397705584  
960.526372655577 569.244038644604 528.512401493184 560.802447943839  
2313.21212353993 640.407302868904 493.322302312578 631.110081413363  
UFD1L 59.1774824918359 49.6203214143464 49.0655215909632 54.8412943008635  
49.6507190068324 50.0748292497578 55.695361644141 55.0698932795613  
62.4267404482092 48.0211752672327 48.8454262547204 51.0290127884273  
UFM1 141.154520472188 139.625593914573 127.60426512782 157.885718433312  
107.161099000408 192.536546957155 113.039124313172 106.51488068372  
117.355761277966 85.9910479975356 107.840833498938 150.46866649779  
UFSP1 58.2902084992082 48.4980626712175 38.9790184198145 35.3829784221072  
46.0977687311222 45.8325181856483 41.706879587091 41.3506832276112  
42.4540072551568 35.93950183586 45.310660704531 40.9683275553869  
UFSP2 146.066596263955 102.490465676619 126.578693258328 133.930007857002  
135.41852974791 211.109957714241 96.4033477961156 128.503671563486  
139.04252811433 133.549684980003 132.3192754634 142.251426773121  
UGCG 96.6833301748676 133.192618821838 78.080034922779 169.582135138401  
100.90948905426 169.99300253813 145.526972410673 217.293240552946  
83.8679756709676 95.2490714726663 131.90520406914 137.632214490732  
UGCGL1 65.493000026614 66.1595900891671 65.1185966859561  
87.9098670472958 71.4183281327686 55.8243694410835 61.3620062177524  
90.5860767851498 59.1223319112238 64.9436811121231 65.2295773603116  
63.3020122223767  
UGCGL2 109.889322825648 165.468411096566 135.106756607914  
126.336900591139 120.26537515666 107.808744445896 136.461760992832  
219.805214090875 134.218973300007 139.142835448881 161.228738711412  
136.711122812062  
UGDH 209.281870980564 192.98559983091 192.003788858976 154.829574442056  
311.195207833203 344.887504955742 237.443715611786 226.407063891022  
253.237824005249 298.848001894468 257.761541860837 468.381233506231  
UGP2 187.026092504992 111.192247184712 136.530734456168 228.08291792003  
115.016486106706 310.900527198512 101.250422688816 94.4224255130445  
180.189935936245 115.044790975532 125.52123746909 273.379591993579  
UGT1A1 46.8141313516997 679.810781641519 82.2766822827861  
40.7481155008596 54.6820069269589 41.9543948167375 104.504444994123  
42.2577689927563 161.326580647514 57.9713749600418 58.8188963227059  
129.143252341926  
UGT1A10 39.5676051939342 438.50123471613 183.746651924774  
32.9879066304034 657.310970474676 81.2314452281031 486.265784810787  
33.3307770183871 843.333981146512 43.6033221838149 94.8036856848998  
237.401487995882  
UGT1A3 45.4799270968969 44.4411734611229 36.3604951341921  
33.5578650644246 37.956732373465 46.8954576545929 41.706879587091  
46.9986083378817 31.9468644542969 36.6893251782922 37.8372168909583  
42.6758568421347  
UGT1A4 39.1590964332473 42.7775752471711 39.7411455670172  
40.5484717678957 43.004943518025 40.7616966228404 41.1507980856436  
41.0381860307445 38.5252456306656 39.9948390976317 37.2018803984555  
38.6454098044474  
UGT1A5 42.7150227340364 41.8848959280916 35.8265993915844  
41.0726336841311 43.1252272136667 42.5660695551615 43.0930293831497

42.7431359850339 40.8970401536578 37.0320432433314 37.2892641289258  
40.5703581862752  
UGT1A6 232.440458525975 284.351747562807 489.983164420779  
47.7319077282024 109.758297200083 47.6251784943271 204.992039590717  
62.0660509811111 257.851199206959 79.1649337367773 122.548989126048  
827.365231733511  
UGT1A7 36.6480005877129 47.1332119496722 40.5734458834617  
35.7674462337723 70.0133734659853 37.5887129572848 60.6548851977964  
48.272324215504 80.2680308979464 43.844855336215 46.4205654140754  
62.6868461044048  
UGT1A8 44.3355304829989 40.9731067463382 37.9482157381008  
37.5382094267692 36.3390947880186 46.0364000143537 44.7255207589606  
40.831207953647 46.581796165231 38.957687788868 41.5421429082231  
73.1008013275549  
UGT1A9 43.2724556187214 43.9421822132391 40.8420925848403  
43.1847628331565 39.6535880152834 40.1428591998404 45.6042625176633  
39.7509165247419 47.798305839406 36.5806287103157 40.3452320167286  
44.2527566343661  
UGT2A1 39.3709357615493 39.8455060654531 38.3166554965434  
34.9849896310235 39.3667161654772 40.7063426028871 38.5066108855005  
38.0254606843504 37.241386734757 37.2089297656361 39.153226699662  
38.9919142475596  
UGT2A3 37.1935273352159 40.6723334103791 37.1188989884324  
35.6928955245309 37.7170995811297 37.1894304543751 39.5496902678788  
39.0620487644635 50.7619345314571 41.3641352453779 37.3687900733549  
36.2809742910335  
UGT2B10 43.1805016690297 42.1607322031054 43.5710871617107  
34.6468794865286 39.7568367479301 35.0970060242246 44.0687697278114  
35.7973685350741 41.5635499110307 35.2880714952489 36.2435874904689  
39.9519547348106  
UGT2B11 41.187562301961 46.1131345131683 43.6039443285137  
38.5252456306656 41.7419877611072 40.8634043028528 55.4948034470314  
40.831207953647 47.3213303943727 43.2988017098387 43.401782064778  
43.9366081640576  
UGT2B15 39.1590964332473 131.842112197926 41.437237454134  
43.1847628331565 39.7210115145672 38.6414316877471 44.8643898647322  
33.1686709314125 113.417671029461 37.0740019672788 41.5421429082231  
40.4639532172338  
UGT2B17 38.6233782790015 120.943323740458 44.8872784170036  
43.2504382247503 40.6380495994768 40.244271403831 51.3064929551674  
40.7826380785043 115.954295099681 40.7568164083581 41.2598458726002  
37.925121819624  
UGT2B28 38.2083710281545 40.716553247236 43.0971787292711  
42.2496337895968 40.3452320167286 39.7394181011603 54.0170817319522  
40.6171774724171 38.9834959368496 42.9866214102525 40.1742127891824  
42.7782216342806  
UGT2B4 46.0398513158469 42.3550738181144 41.8389336728199  
41.7614975630362 40.4639532172338 43.3269087731399 40.369768755239  
39.8965727231863 42.1089765085639 43.2988017098387 43.9063490244748  
40.8098117292322  
UGT2B7 55.9249770393176 120.26537515666 146.90802741139  
38.3166554965434 106.752660061588 49.9242614590886 246.869486382264  
50.9316571524777 187.331614826395 67.1278109419819 94.428252478069  
142.172292334093

UGT3A1 41.7397731376692 39.0102066700839 34.806104801006  
 43.4410741327254 43.004943518025 43.4681646416585 40.0052661202207  
 46.8954576545929 47.1744296124496 45.1569741609597 38.079222289614  
 44.9070250604284  
 UGT3A2 39.1590964332473 40.5400384479766 45.310660704531  
 40.9607305725196 39.4693871570028 40.3357777530419 57.1070449050465  
 42.7431359850339 38.6322728994674 40.8049408996274 35.9563099719284  
 42.57175366709  
 UGT8 40.5654775358427 45.2098033805679 40.244271403831 39.1335009052403  
 41.6806984441849 41.159706131351 43.4544762830742 42.3887531663733  
 54.6354070737962 39.0648733099061 42.8742421276144 39.3575468494941  
 UHMK1 37.55264801907 47.8400694856726 56.7776874358774 54.6089451252049  
 47.0954207417646 44.8872784170036 55.9276266345493 49.7309743973184  
 48.1174861108648 48.8623729374733 42.8263096141654 45.0035308952466  
 UHRF1 176.02137177982 319.596352961751 142.48688219605 76.8713035584472  
 354.634819362978 76.889690218685 353.076989769287 154.829574442056  
 307.656792056993 45.7371044724173 43.4424616940528 59.0457625163577  
 UHRF1BP1L 47.8832476959752 45.3742611630514 44.5134109184888  
 50.1027491117756 47.2074332636566 50.1656162096553 52.561573697155  
 60.1444334141838 48.3699741879723 44.6217658428521 47.9228676074352  
 46.9919960628953  
 UHRF2 57.6913861717513 60.3093790894864 43.4709415392696 48.1662933382789  
 49.7235523248653 78.9521593412581 59.1774824918359 49.9332280449549  
 54.998510746958 54.2830238965339 61.2529834995512 59.987045425047  
 UIMC1 351.188432232165 200.002687565519 250.799060762208 320.889609846069  
 328.63511311303 344.737170118121 200.002687565519 275.811139268285  
 304.777565078155 410.808988840343 399.410299413602 508.688028777582  
 ULBP1 36.3649677956953 44.6918600441328 38.8775560911841 40.1804147506786  
 39.2608760193011 44.6524308640784 40.1235656101329 40.4359177791566  
 45.7452456977857 42.2614524730856 40.1742127891824 33.4316681623175  
 ULBP3 38.6454098044474 44.4411734611229 45.310660704531 42.2496337895968  
 37.3508690072156 42.750861693377 44.0687697278114 44.9977782988116  
 43.6670755115848 43.0919221375514 41.9083581529276 42.4607795638552  
 ULK1 548.047774435177 377.221676837377 346.285308869994 224.749607192071  
 261.929727465462 221.015209694864 272.930242946726 267.232315058148  
 413.067407579649 263.21493129287 227.686495419561 187.656257079035  
 ULK2 32.0823591288671 42.3550738181144 33.7737772393677 40.0698728584484  
 45.1137938810047 49.7458652239071 43.9450023643394 42.2577689927563  
 40.6957787921451 56.8201201798712 44.2142581488029 51.0647893605839  
 ULK3 63.915453398266 78.806097512943 64.7318794662958 71.0211264570699  
 73.8251606025227 55.3202238943712 78.4937314423253 52.5909491535773  
 80.4554147910354 102.771611905219 69.6097529955737 65.524821699432  
 UMOD 36.1812049498986 38.2263227947189 43.0016969050339 40.2455972565968  
 33.9435456570176 41.1090481599939 40.0603121770344 41.2098211956301  
 38.9496515344837 38.4829727716328 38.9240290061433 35.2448979801094  
 UMODL1 38.932557955217 38.956280281655 41.785676764591  
 37.4585919849752 37.2949506366592 38.7340969861754 38.6591482441783  
 41.1575777497576 37.409945204123 40.1179210534118 37.8766103688718  
 44.300405016053  
 UMPS 51.5033727579864 51.524711857679 43.5710871617107 37.651298468202  
 58.6481644777552 37.0180934800573 42.8684958525042 39.9576138799997  
 35.4332080966594 36.5806287103157 37.4642807402741 40.8681871019812  
 UNC119 49.7188990489616 56.4199442234707 50.2869791217819  
 44.1483976313959 67.2779942308321 49.641159251878 41.5464765641928



46.5421017969405 60.9594847577747 44.7520317855773 50.5012374236055  
49.5197902747103  
UNC13A 45.9426591985894 41.9560252208629 40.7910160811527  
43.8545817719723 42.558457786077 49.0361180089431 43.6084517252627  
45.8108990837624 45.3407340000202 45.1569741609597 44.1533327883807  
44.0246886382298  
UNC13B 65.6556779936059 53.5281825103894 52.9111155236961  
42.5664883002833 41.3755760434934 39.8455060654531 54.9765783642973  
57.037639245179 46.3203995372658 55.4037482627222 50.2203578628217  
68.7753456118815  
UNC13C 38.3360516835506 47.299647867533 38.4043916290561  
40.7481155008596 41.7405682794166 37.8442841690502 45.1735152121056  
40.0873854338318 39.4397788230732 40.4136535208406 39.9899430628542  
40.3302268293707  
UNC13D 122.495387796233 74.8071157013401 64.5232087947596  
123.281175151414 45.4751076037511 51.8103411703261 87.0685571351947  
220.454785391748 45.4799270968969 84.0691608193405 108.512469038407  
63.6966761077037  
UNC45A 185.474249522831 189.055029582117 149.8814624626  
163.067962559455 181.873969432903 207.568343362834 256.426184741007  
194.278792348966 201.764909400617 225.827961496781 285.053017606956  
246.771126452577  
UNC45B 33.7948557837079 39.0894172982439 41.1367478979484  
40.8681871019812 42.3536549114165 40.5281496800812 40.968974769473  
36.8982253308785 37.0526522140242 38.3092241935352 43.3085358214154  
40.2669497398702  
UNC50 459.92905629125 642.211963248041 639.391575249793 525.687522832693  
641.103199748891 419.563859911367 401.202348352506 312.984737387254  
624.097858948785 627.914461428624 501.319993127353 851.108027634251  
UNC5A 59.220967994972 41.8073910693411 31.6419446793642 41.1886975241176  
40.7779767565889 47.0940613507321 36.4098694708483 49.8344973836834  
41.3803269429468 41.6373771565199 40.0766543123257 43.1805016690297  
UNC5B 62.8091467605856 82.7083356310191 92.3659612653822 48.9944486068347  
45.2556760873335 42.808889470973 53.8687221233237 50.563951934942  
64.7116910405493 85.8154958329408 79.4053001255904 64.650642183463  
UNC5C 46.1673159982664 40.4359177791566 51.3268475761593 44.265834798964  
43.4544762830742 47.3791873993182 46.4388841354122 42.357910063876  
50.401623258584 44.6918600441328 46.0095710163378 43.8575940017119  
UNC5CL 50.0466349801009 38.9338521051669 42.3536549114165  
45.1944222548351 39.859345745831 37.9003288112261 36.7356360093603  
41.1575777497576 36.8127605061228 41.2276963324981 37.9230440150891  
40.9683275553869  
UNC5D 36.8072833828297 33.1817617228171 35.2101597814352 34.2080003860523  
34.2638875325204 34.3887641786747 35.2163900400329 34.2814697823693  
32.039934894666 33.9967481174035 30.7315474127249 32.1545709776983  
UNC84A 198.288493088076 325.990132666873 240.55212989103  
160.056757080676 435.209988251425 352.917938567734 214.873872837015  
182.52420078643 401.45848063233 225.389113475883 248.599530435666  
248.924819383887  
UNC84B 946.081492716653 1910.5347560855 1086.12171444149  
1007.03747721563 1349.09482344633 1067.08316477623 830.295872113419  
1120.83891847181 2348.48320928245 1810.67209360676 2294.75523373329  
1630.25992078321

UNC93A 41.6354649482853 44.0409178714232 43.1931731665131  
41.6564075217517 37.4470183315826 41.7627910693483 40.6750540874299  
39.4710743516517 42.1594905198929 35.7202909649682 42.5426057453993  
37.8490162439785  
UNC93B1 121.104663867264 341.97050042695 211.790532633462  
300.762511215441 157.082769443568 123.586057618734 291.785618741057  
188.077820976107 312.530335465784 267.29148042787 240.086349973689  
231.361506886859  
UNCX 43.844855336215 37.920964499903 40.6737160001291 39.1706564265495  
42.6022652963326 42.0574848021044 43.0930293831497 41.0381860307445  
44.1519466943185 38.8507804383261 39.8184668132023 41.3481355128089  
UNG 145.883224917856 159.925087917307 123.368987753537 62.2982003555312  
182.885934774318 75.2735539010032 189.204794959564 101.888001006345  
205.24499293304 102.771611905219 109.294124176508 125.735441231594  
UNG2 50.8388984085636 51.8610060995363 50.9010149857308 44.0451487108213  
48.5000946421718 53.3185097662527 51.1541843174981 55.3122077514658  
50.5785738734431 54.1683282066029 46.5650556481721 40.8681871019812  
UNK 37.4554876386402 39.0102066700839 42.4580504587581 42.357910063876  
38.9496515344837 44.3648993568405 45.7452456977857 38.956280281655  
43.0930293831497 41.9666541498638 40.8225507267584 40.5703581862752  
UNKL 45.4607426241257 49.0697565324841 53.5224822626949 44.265834798964  
44.1070537445005 45.7300501624017 48.2439143986124 43.6740007496465  
42.1594905198929 45.9356781508849 50.9160746031872 46.1131345131683  
UNQ1940 45.4799270968969 43.683792219729 44.5134109184888  
34.7266486944713 47.6884372645373 50.4022543872993 36.634024014558  
36.8400213077707 45.3756389170606 39.7835513496873 46.5650556481721  
38.2350720635382  
UNQ2541 36.2496364442264 4569.48246031279 44.2405728317107  
43.8002456102021 44.5668141895992 44.6524308640784 50.8388984085636  
30.9565415432614 41.4636047919453 108.111248374368 61.0094935318105  
36.8690774823319  
UNQ5830 44.9896851005259 38.9338521051669 41.6977706798234  
41.8778873678551 42.4864576619427 43.4681646416585 46.9929836306816  
42.0494116081998 44.3440839686558 41.5435611403119 43.6629145624937  
45.4799270968969  
UNQ6975 43.0930293831497 32.742439449766 49.3000844711116  
38.745552403895 43.844855336215 42.357910063876 43.1931731665131  
46.0633179231318 42.6366765186182 41.5435611403119 41.9908237694988  
42.6758568421347  
UNQ830 77.9057333780847 47.4740726032707 52.8041782638549  
42.8235313007746 78.3542840447759 51.9421032049606 61.6544855697851  
145.630337418553 57.678188678075 88.0664425843955 72.0389007415456  
58.2879293130296  
UNQ9370 35.5179217192467 44.5152708955623 41.2365089689635  
38.2041059863839 33.0463640202858 29.745266251498 39.2533668167483  
36.7460922671619 47.0804681460898 38.528621456378 40.6373400186325  
38.3291713594599  
UNQ9391 40.148780650831 42.6022652963326 37.0642268327439  
37.5382094267692 43.844855336215 39.2248354955045 43.0930293831497  
45.8669209716694 44.5303781239209 39.3698811593364 38.079222289614  
42.357910063876  
UNQ9433 41.2424637338424 64.9959712888709 39.2707964550441  
39.853175885492 41.0885562160946 34.9849896310235 43.8206425661746

|         |                  |                  |                  |                  |
|---------|------------------|------------------|------------------|------------------|
|         | 41.8417024632349 | 44.5303781239209 | 41.1222709786153 | 48.6184776976167 |
|         | 70.0907269565408 |                  |                  |                  |
| UNQ9438 | 45.2875173643252 | 43.2649781354792 | 44.2405728317107 |                  |
|         | 46.1673159982664 | 42.6022652963326 | 46.1513019317765 | 47.5963750520409 |
|         | 43.0390857698452 | 48.2123120250343 | 39.6719190054379 | 43.1931731665131 |
|         | 39.1553169409075 |                  |                  |                  |
| UPB1    | 38.8561375693335 | 47.5647821785529 | 44.2405728317107 | 46.614092935749  |
|         | 50.0580547772867 | 41.7627910693483 | 38.7337086062875 | 36.43924066428   |
|         | 38.3418933808844 | 41.0057887014368 | 35.1470994647364 | 42.7782216342806 |
| UPF1    | 162.864661742501 | 189.164097331837 | 177.958475301951 | 156.382146982116 |
|         | 240.431987635418 | 162.37682406314  | 192.812519184065 | 218.19156738004  |
|         | 196.844428284247 | 253.267901237295 | 281.774690337889 | 179.756604242873 |
| UPF2    | 167.319747725488 | 131.156876010639 | 148.781721594419 | 179.581456201363 |
|         | 167.05554959607  | 201.486224052899 | 195.893183546434 | 203.946427426126 |
|         | 161.471040999844 | 271.104193102849 | 253.140146266702 | 239.117228656704 |
| UPF3A   | 111.041991642022 | 140.559370165331 | 146.737709403779 | 104.672760332135 |
|         | 197.813848976726 | 139.342661711134 | 114.755820699611 | 96.332996264667  |
|         | 98.9113424606303 | 125.868437542325 | 124.56803502087  | 123.817018264773 |
| UPF3B   | 185.312851727212 | 88.2639730639822 | 122.170704886985 | 103.961956810572 |
|         | 205.898127436939 | 176.064476306748 | 174.64729344609  | 166.036790614812 |
|         | 168.492959515167 | 157.7623351008   | 139.796374175417 | 150.801729138762 |
| UPK1A   | 54.6235981131919 | 2903.00880209344 | 1487.80306986156 | 47.0874209746031 |
|         | 2045.24530722676 | 280.117410663595 | 1928.53890809223 | 1126.31998762007 |
|         | 355.821515437298 | 7022.41612496714 | 7075.82842238887 | 3202.8848520816  |
| UPK1B   | 36.4564050256915 | 42.6022652963326 | 100.645556491457 | 44.1483976313959 |
|         | 100.034549511526 | 45.9266745571724 | 43.0930293831497 | 37.1317006162938 |
|         | 49.3780606970538 | 53.4109882045447 | 70.0059240383657 | 73.9192243586276 |
| UPK2    | 43.6706764143908 | 542.901822331329 | 354.973265582488 | 39.3750969348308 |
|         | 321.171736253617 | 70.8674195845729 | 311.810240385503 | 1065.70206468134 |
|         | 265.545792706874 | 240.841214170409 | 349.589955244523 | 84.1030588938732 |
| UPK3A   | 44.1294459089314 | 57.4054069675016 | 42.7303139017786 | 45.8844325913247 |
|         | 45.1137938810047 | 38.7340969861754 | 54.1707158323527 | 181.488068017883 |
|         | 49.3780606970538 | 84.1639779987105 | 126.79509061532  | 55.8775622338124 |
| UPK3B   | 47.6916934483422 | 178.592741163095 | 49.2041300973417 | 41.0337778763237 |
|         | 96.2490896573253 | 44.6054547125617 | 97.2316181542823 | 117.215323339475 |
|         | 487.261132702908 | 44.2007595876705 | 169.859588818306 | 116.318299211619 |
| UPP1    | 269.91014029861  | 105.046407769128 | 130.249044369793 | 647.297964303385 |
|         | 100.489477730896 | 141.108035324183 | 227.361044585582 | 285.826380698286 |
|         | 279.063292799015 | 114.488672372067 | 110.036754099036 | 133.626390404589 |
| UPP2    | 43.0930293831497 | 39.8695929627783 | 34.806104801006  | 42.357910063876  |
|         | 42.7107928951766 | 38.2293008890613 | 37.2892641289258 | 38.3684202018524 |
|         | 38.1169703906207 | 36.2435874904689 | 45.1432412071268 | 44.2527566343661 |
| UPRT    | 81.9258201510475 | 100.616027485975 | 80.531334073336  | 106.582060920252 |
|         | 61.5236837309467 | 106.78552222475  | 103.316970096472 | 132.52749757795  |
|         | 115.748516258517 | 97.2865629929716 | 90.6191520659197 | 121.354667375673 |
| UQCC    | 108.525500270474 | 116.22441634196  | 104.351256270039 | 77.9085946827079 |
|         | 131.277614500948 | 106.186051982612 | 103.316970096472 | 122.331946672266 |
|         | 108.700838142885 | 114.445779948228 | 108.855682928578 | 106.804269453898 |
| UQCR    | 52.8427643366617 | 52.1062000766427 | 60.9621846036092 | 53.3967242431461 |
|         | 52.3242437351389 | 83.0554837248934 | 48.8319884367456 | 48.1591264215184 |
|         | 70.9462008788871 | 62.6984594468418 | 65.342842101283  | 59.9326265577462 |
| UQCRB   | 120.129857395808 | 118.752208441493 | 82.6036671634626 | 102.483081702338 |
|         | 141.994123068328 | 91.4446109489387 | 80.882176929636  | 97.2750076101755 |
|         | 125.209476374199 | 74.3482661085192 | 66.5893437215387 | 113.198141130994 |

|         |                  |                  |                  |                  |
|---------|------------------|------------------|------------------|------------------|
| UQCRC1  | 522.811631783729 | 438.22469176123  | 596.384327208699 |                  |
|         | 392.796524588309 | 390.331295238889 | 388.458756841292 | 718.832367050609 |
|         | 419.563859911367 | 785.79878416775  | 458.230500859847 | 456.992521713593 |
|         | 463.527266972118 |                  |                  |                  |
| UQCRC2  | 80.3730667493235 | 152.972693071526 | 269.582598918998 |                  |
|         | 161.870972980732 | 124.664792638889 | 204.63343271995  | 123.868848519181 |
|         | 236.565670642447 | 215.800662077432 | 117.881330279882 | 177.602690452814 |
|         | 206.261432452217 |                  |                  |                  |
| UQCRFS1 | 2201.39729904166 | 2032.18819581205 | 1842.15643221012 |                  |
|         | 1459.69929955338 | 3428.74022048394 | 1813.65521720537 | 2280.42953098693 |
|         | 1234.59589464045 | 2456.86796652313 | 1080.43016747082 | 1105.00321488322 |
|         | 1704.0522304387  |                  |                  |                  |
| UQCRH   | 1023.81381775221 | 960.526372655577 | 925.486088550061 | 766.337559135016 |
|         | 1297.78424326775 | 943.73554571528  | 794.806085783439 | 1154.6386362     |
|         | 1626.71747158994 | 553.707482409148 | 598.404003732481 | 1237.93130196998 |
| UQCRQ   | 3800.19142219719 | 2506.05102956991 | 3153.71394627237 | 2248.64628069362 |
|         | 1981.03929621057 | 2220.90215179682 | 5018.90384962952 | 5354.58328030315 |
|         | 4717.02689540013 | 2779.37660132136 | 3546.97585966225 | 4048.33132153903 |
| URG4    | 227.059460958349 | 150.387474375456 | 180.447835336714 | 119.015431849218 |
|         | 169.500205172068 | 169.951840840983 | 155.174579191838 | 147.300356318739 |
|         | 198.432987946699 | 221.22852405053  | 228.615793354146 | 156.088284999883 |
| URM1    | 834.14766574977  | 715.662312404643 | 381.533380474563 | 468.477585169219 |
|         | 442.99540222483  | 481.318671971899 | 1212.61529575798 | 484.218958528411 |
|         | 665.510487460287 | 806.34906276292  | 763.947361966861 | 514.261598258395 |
| UROC1   | 41.6354649482853 | 43.5182502375207 | 43.5710871617107 | 35.3829784221072 |
|         | 38.0598374201407 | 47.0940613507321 | 48.4859552186772 | 38.4540849632254 |
|         | 38.3418933808844 | 42.2614524730856 | 44.2142581488029 | 41.5536168238478 |
| UROD    | 396.93169345515  | 200.41782363596  | 325.676668250281 | 294.51382100172  |
|         | 255.884444464408 | 463.84209540456  | 251.184621899165 | 460.162024551004 |
|         | 304.258586051126 | 400.416888798951 | 331.173265739654 | 328.855843739232 |
| UROS    | 289.533968432846 | 258.038442651578 | 312.469507672374 | 336.390195295291 |
|         | 465.266372824212 | 585.771656887036 | 543.975237512604 | 350.451704069255 |
|         | 288.386446189379 | 318.768560912915 | 316.604316194398 | 201.301705082976 |
| USE1    | 53.3967242431461 | 49.7363778831003 | 55.094385444315  | 69.5544840164738 |
|         | 73.6965494979349 | 77.1317865202676 | 62.6885730386156 | 68.8058577447202 |
|         | 57.7865070833351 | 58.3813211109331 | 59.9682734755814 | 60.5948704279864 |
| USF1    | 82.8485522398913 | 81.638176606529  | 83.5149142053137 | 81.2269477373795 |
|         | 80.6200293361016 | 62.2162877546933 | 70.4794854241035 | 58.9676332048764 |
|         | 158.718808397001 | 56.1912096308988 | 67.3269632644926 | 72.9580216367379 |
| USF2    | 128.576322740245 | 156.150710793563 | 140.369714831352 | 196.17328008185  |
|         | 178.688550924272 | 180.222765336208 | 211.790532633462 | 166.259094844446 |
|         | 205.187554095744 | 141.206849814363 | 176.557322629245 | 118.614027673431 |
| USH1C   | 37.3463875295726 | 42.0709558258414 | 40.0998167098057 | 38.4208429103799 |
|         | 38.514058966346  | 41.7627910693483 | 39.8695929627783 | 37.9837233601316 |
|         | 36.0741672064298 | 41.6724739851995 | 39.8184668132023 | 39.3575468494941 |
| USH1G   | 53.7507429765038 | 49.5443425465542 | 51.7138050344355 | 49.1786207920603 |
|         | 43.1252272136667 | 49.3172204533818 | 53.7423898357583 | 44.2159020605784 |
|         | 53.3094843669564 | 63.7002949745101 | 53.8856501960117 | 46.0633179231318 |
| USH2A   | 40.8681871019812 | 40.7602938767524 | 42.3982765397961 | 40.0698728584484 |
|         | 40.0145811166794 | 41.6306548175333 | 39.9361851865743 | 38.9250652267493 |
|         | 43.5159282665921 | 41.9097689475185 | 39.7342718293432 | 43.6524978417454 |
| USH3A   | 38.6454098044474 | 43.1805016690297 | 42.3536549114165 | 31.8431345631453 |
|         | 43.5544347011646 | 41.6590564937735 | 40.2154497375715 | 43.3262148375525 |
|         | 42.0621425894624 | 43.0919221375514 | 37.3687900733549 | 39.0536056496869 |

|        |                  |                  |                  |                  |
|--------|------------------|------------------|------------------|------------------|
| USHBP1 | 47.0940613507321 | 42.6939394537076 | 43.1931731665131 |                  |
|        | 43.4410741327254 | 41.3755760434934 | 49.9699131196797 | 42.1607322031054 |
|        | 47.6952179922944 | 43.1805016690297 | 41.9666541498638 | 42.357910063876  |
|        | 43.2776458914333 |                  |                  |                  |
| USMG5  | 41.6354649482853 | 55.3477556906605 | 63.5107036952143 | 123.138085708441 |
|        | 43.2484996523549 | 48.6621527194963 | 149.312893905408 | 39.3709357615493 |
|        | 55.6617952786921 | 75.0665411373616 | 83.0554837248934 | 126.115065200084 |
| USO1   | 391.528019827951 | 395.755223372329 | 360.784460384046 | 425.692369974286 |
|        | 226.262409390222 | 520.415257194417 | 246.568253751149 | 310.120875196999 |
|        | 256.766675299448 | 297.701126167694 | 305.786520619504 | 422.931891494195 |
| USP1   | 90.8236750745974 | 68.8570376191283 | 58.2986825661503 | 54.0374522273907 |
|        | 67.4534389579576 | 70.3117160953476 | 99.8699868526053 | 70.2541961995753 |
|        | 88.7605288058249 | 63.3872214856708 | 66.3026572113793 | 66.9665871090772 |
| USP10  | 110.609133094021 | 150.723391206253 | 172.070926124844 | 200.401133392259 |
|        | 128.749209040345 | 134.749803376372 | 166.33117014492  | 85.0308877626746 |
|        | 137.10896135739  | 88.0664425843955 | 108.12482131423  | 134.307645598718 |
| USP11  | 115.894467332637 | 154.232642598588 | 151.99110418225  | 95.7571966348067 |
|        | 129.613152757362 | 137.034037711549 | 156.311985997533 | 109.326279686847 |
|        | 102.282066142307 | 183.799353414581 | 173.391542207362 | 147.902378647394 |
| USP12  | 41.6354649482853 | 44.2630383225933 | 39.6451483836089 | 37.4223289687135 |
|        | 38.3561682218911 | 49.641159251878  | 43.3262148375525 | 41.6466169548846 |
|        | 40.2274522635576 | 37.8217989841918 | 33.2774014136617 | 47.5025821041537 |
| USP13  | 58.2902084992082 | 57.1595768494068 | 68.1780382173625 | 87.2643859655159 |
|        | 124.664792638889 | 128.923092916744 | 107.148000219752 | 100.370937669662 |
|        | 65.3672880026114 | 67.5503668962444 | 97.2615918872914 | 64.7346994616044 |
| USP14  | 81.3895045947915 | 110.715042245563 | 124.605379715077 | 105.125095381533 |
|        | 104.80882886573  | 162.202548351392 | 128.885933852704 | 96.2680061150588 |
|        | 93.9069049911808 | 93.7782490229256 | 107.538934056558 | 97.7965639721152 |
| USP15  | 62.6702927225656 | 56.2851430356168 | 56.3471340054074 | 94.4501786945034 |
|        | 49.32293280121   | 88.8760662992208 | 49.6872467499977 | 51.8347877274018 |
|        | 59.198088069573  | 67.1278109419819 | 67.0361353184222 | 72.4094549259929 |
| USP16  | 123.219313750907 | 184.65212689433  | 176.861690566909 | 202.154195547644 |
|        | 168.58183910352  | 248.390047812338 | 163.299997237276 | 149.173801572239 |
|        | 217.456127221867 | 138.436822676252 | 149.27230040094  | 165.974848305379 |
| USP19  | 51.7607563002005 | 48.4980626712175 | 54.4384603094793 | 49.5424425850549 |
|        | 60.2886873195135 | 42.4580504587581 | 53.3111230705754 | 49.7309743973184 |
|        | 53.3094843669564 | 53.4109882045447 | 58.3586374083245 | 48.0350549043063 |
| USP2   | 43.0001432913058 | 40.9355378385932 | 40.3452320167286 | 43.3554905202712 |
|        | 45.9746342414924 | 46.4343327861696 | 41.3594868055879 | 44.6708453138373 |
|        | 39.8022382792104 | 41.6657053704762 | 40.8730692351493 | 39.1553169409075 |
| USP20  | 38.385865183581  | 43.683792219729  | 42.8723769353017 | 40.3180310664156 |
|        | 41.8441156763056 | 43.4263583096036 | 39.3585350448719 | 39.9576138799997 |
|        | 40.6957787921451 | 36.4351122729314 | 44.3763859390287 | 40.2669497398702 |
| USP21  | 80.8943070653517 | 94.8036856848998 | 152.250444470971 | 54.0374522273907 |
|        | 127.008218054726 | 97.7114610828769 | 84.5467315697834 | 62.8270556619309 |
|        | 309.802432824498 | 93.4726264307041 | 83.4679576894911 | 84.9051787279092 |
| USP22  | 52.6554629843702 | 64.2084111281705 | 52.2591411217604 | 49.8281348927244 |
|        | 59.2837628958562 | 47.6291313305386 | 53.8184424596644 | 43.9366081640576 |
|        | 55.9423752286714 | 43.3497340062963 | 46.2871406825079 | 48.6519290584047 |
| USP24  | 576.830397705584 | 261.929727465462 | 276.321098534247 | 242.282363793567 |
|        | 222.426799131736 | 266.905855859261 | 292.600202149564 | 301.025314855652 |
|        | 275.882262550383 | 415.15150032168  | 313.399524593316 | 310.461601607662 |

|        |                  |                  |                  |                  |
|--------|------------------|------------------|------------------|------------------|
| USP25  | 37.3463875295726 | 40.8880530359822 | 39.991353369336  | 44.4367387274922 |
|        | 41.9842695818285 | 46.4648868771662 | 47.5963750520409 | 45.3872406432794 |
|        | 57.2716485658185 | 45.4614234442527 | 48.6184776976167 | 52.4992300612807 |
| USP26  | 42.5193208629123 | 54.0052948715814 | 56.7776874358774 | 71.0211264570699 |
|        | 64.9072331703985 | 53.3185097662527 | 66.0350709576651 | 54.5125550937898 |
|        | 64.7766649630041 | 57.2813205536176 | 55.4694986901287 | 58.5478485621444 |
| USP27X | 45.6517320730042 | 45.9266745571724 | 47.5673419710251 |                  |
|        | 45.1944222548351 | 45.5809132232681 | 45.4882438975269 | 50.3519150282938 |
|        | 43.0390857698452 | 45.6582729799009 | 39.4710743516517 | 43.4709415392696 |
|        | 47.5025821041537 |                  |                  |                  |
| USP28  | 48.4849194706125 | 38.6414316877471 | 40.301483914446  | 43.9282059368202 |
|        | 43.004943518025  | 45.7300501624017 | 38.941855825269  | 42.9301944191913 |
|        | 46.4861258030402 | 41.1222709786153 | 45.7328341667151 | 42.8864415494484 |
| USP29  | 39.3709357615493 | 44.7829632472754 | 39.6451483836089 | 41.0726336841311 |
|        | 42.6022652963326 | 44.8872784170036 | 38.0598374201407 | 44.0390019242862 |
|        | 37.1820543575123 | 40.8970401536578 | 34.3633615460307 | 42.57175366709   |
| USP3   | 351.764130340952 | 718.832367050609 | 277.244576031507 | 566.77872642437  |
|        | 490.652353306749 | 232.440458525975 | 644.924175130155 | 488.463605278409 |
|        | 648.380417557148 | 516.349618186681 | 399.733432664718 | 449.059703234741 |
| USP30  | 55.8218917166321 | 60.4646208319121 | 70.0059240383657 | 45.5869891570251 |
|        | 68.5888253504788 | 46.3715909653832 | 62.9165938167938 | 55.5578334877425 |
|        | 75.7991766454243 | 49.7259371799014 | 54.4825201506931 | 49.4786466722535 |
| USP31  | 40.6559419616644 | 43.3458769998118 | 49.4573631027613 | 40.3180310664156 |
|        | 45.1137938810047 | 41.4508241771315 | 53.8687221233237 | 47.9942520395434 |
|        | 44.1519466943185 | 55.5206840401643 | 48.2910530887214 | 51.4308501933893 |
| USP32  | 41.8890826572422 | 36.7495703772303 | 41.467005949568  | 42.1679276329916 |
|        | 39.3100256336821 | 42.799989590625  | 39.6222000738266 | 42.0778399888414 |
|        | 45.6582729799009 | 47.4767851750188 | 37.1591907090357 | 46.7182294568603 |
| USP33  | 59.0894921452893 | 69.9767092409915 | 64.2142377236452 | 56.6458456890715 |
|        | 68.2428802339852 | 53.9150559426116 | 49.540449125788  | 63.287067794195  |
|        | 47.27543600687   | 52.3935328534772 | 50.5188367542048 | 60.7985356140269 |
| USP34  | 169.391313189738 | 119.434418653131 | 116.949813289388 | 144.813029178278 |
|        | 114.445779948228 | 138.436822676252 | 98.5663841503803 | 153.279284223069 |
|        | 153.42135363926  | 129.272985305607 | 134.285947677624 | 125.690995228055 |
| USP35  | 52.8427643366617 | 58.9128486419884 | 52.0742951366864 | 52.3004056941891 |
|        | 57.9161791762225 | 55.540888910486  | 44.0687697278114 | 47.9942520395434 |
|        | 45.0017158586743 | 56.3441077510744 | 50.9815930710768 | 49.8253396161069 |
| USP36  | 77.9057333780847 | 103.707931766117 | 100.305262467668 | 211.926421068313 |
|        | 131.632115558243 | 136.913434348036 | 68.878562323012  | 190.242383482058 |
|        | 84.9075858560758 | 94.7110944331075 | 64.5347406608537 | 94.5501397951415 |
| USP37  | 93.9069049911808 | 63.8399092891728 | 64.1080166181228 | 82.7394574977114 |
|        | 79.1039287828151 | 83.7019398654324 | 103.545764794149 | 106.917042272027 |
|        | 112.311249826645 | 102.044838876428 | 96.6969760559963 | 94.4769283676944 |
| USP38  | 143.478533731355 | 208.743876555152 | 185.54813083393  | 200.036360605006 |
|        | 190.703466372947 | 138.972884942374 | 147.65688475427  | 183.66684597416  |
|        | 212.664574366477 | 160.868571611805 | 136.011269830829 | 151.641746442323 |
| USP39  | 300.412043023998 | 258.446095955014 | 260.964562714558 | 244.343381048643 |
|        | 305.959643033169 | 289.213144287085 | 289.843931942051 | 344.314901683001 |
|        | 407.336051853854 | 292.99497881914  | 340.105993325165 | 273.108672916862 |
| USP4   | 61.6544855697851 | 97.712117589297  | 124.280024888206 | 106.125117937458 |
|        | 101.017461500409 | 103.734064904898 | 112.60230393988  | 75.9982017195791 |
|        | 103.631449539809 | 105.71315237465  | 99.5125674355716 | 112.753674408958 |

USP40 53.0290605707162 54.6089451252049 56.3471340054074 42.2496337895968  
58.037539503209 45.0882356578404 50.8388984085636 47.2009420656854  
62.4776210012906 48.9826868640753 47.8284278211109 50.1579724208315  
USP41 43.9309845324767 48.4738047182256 40.9861485852278 42.6913548400127  
46.8983071432587 40.8135175201235 41.9820792173615 45.5856092593011  
46.4861258030402 42.1622837416589 43.6875139416756 44.5973052166071  
USP42 132.117013391364 146.90802741139 124.156774983746 110.88526946931  
199.208033538936 105.525194437454 124.76401857899 108.156702405177  
136.081259669601 115.853867920678 112.211717641877 98.2074490157865  
USP43 48.5835484742456 42.3550738181144 38.4043916290561 39.853175885492  
40.8873907150245 39.8455060654531 42.7431359850339 38.3684202018524  
39.9444191873552 40.8970401536578 45.1432412071268 38.4330755397458  
USP44 36.4564050256915 38.5252456306656 36.131485826118 39.1706564265495  
42.3685136297603 40.8091178323174 42.2577689927563 39.1652965788406  
38.3981095229401 36.6396388746561 43.0016969050339 37.4554876386402  
USP45 50.9381343674699 48.0296332183129 43.1931731665131 39.1706564265495  
45.1137938810047 46.8954576545929 39.1539892144371 39.853866204927  
46.4861258030402 41.6373771565199 44.8872784170036 52.1186591838715  
USP46 44.9896851005259 74.1686961093736 57.7415362494584 37.651298468202  
68.307513091369 61.3620062177524 59.1774824918359 54.720204938924  
46.8873421271259 50.4234835272833 53.9517841438975 55.0767527801658  
USP47 55.3153799233744 72.9051985681184 66.4079972657486 47.9915414951747  
45.1137938810047 110.540953771795 44.9863726205428 51.4360013601805  
69.3300058073438 146.426853713038 120.289145237975 98.7331384143685  
USP48 58.8993834673475 58.8856060454401 59.4929048198583 65.8028755495823  
59.130016450219 58.0910843932181 59.9174456081704 64.4552309967362  
57.6336931026499 59.5785089386245 62.0946663000834 61.1022920882065  
USP49 864.302844775203 420.761600667193 462.362735276132 809.577874019028  
379.377005627283 318.369837408344 651.621028098039 1487.80306986156  
377.409970666607 1119.61164710566 1149.90692951795 926.61614755153  
USP5 679.309039810384 770.715044136717 711.773459577386 317.892699374852  
483.000434270291 530.710127703061 764.571579067138 635.52621743309  
971.856840043688 853.947671456736 919.542051089664 451.820169649522  
USP50 32.3120809246762 36.1232327599945 36.4564050256915 32.6817359372544  
38.2496050953547 39.0266821712099 39.4600924554505 37.2237132058632  
37.3600014814388 38.2069499294002 40.723990462047 35.4484652445078  
USP51 38.1169703906207 40.148780650831 45.310660704531 33.8111782249716  
40.8873907150245 36.6996187567892 44.7255207589606 38.4540849632254  
41.9635525160083 43.401782064778 47.2134341420411 43.4709415392696  
USP53 47.9175508887533 60.8608693323868 65.3531590366085 45.1944222548351  
65.0605897122361 53.9517841438975 65.0031119608637 46.2779564481158  
57.0301170427216 46.2286164776607 50.4740079109854 88.0186381834147  
USP54 66.3095900379311 50.543526404059 52.4485219671976 52.5307002738469  
43.3332476888305 52.9482338979681 58.8993834673475 47.2864663693787  
66.4251023257203 48.2596564318071 52.5154971256566 53.3904307221902  
USP6 39.3709357615493 34.5023764006976 41.9666541498638 41.3027031037343  
40.6723334103791 34.0777108441756 37.1643693306382 37.5511560880902  
35.6970528713709 37.5343260962758 32.0500360504817 40.6614700944853  
USP6NL 71.9062462001972 70.5171002055327 63.3544794716167  
67.3439996689706 75.2824161164996 49.7458652239071 79.6581393791238  
64.6748464612845 87.3342335690393 63.7417623042104 61.4121672148248  
62.4450952595811

|        |                  |                  |                  |                  |
|--------|------------------|------------------|------------------|------------------|
| USP7   | 95.2614267797703 | 120.60052672409  | 130.506891299903 | 95.9391851122771 |
|        | 115.229070906222 | 109.137372445043 | 105.945216149549 | 161.683983819852 |
|        | 134.968128884298 | 103.968071466212 | 133.981674663494 | 100.386011517899 |
| USP8   | 82.9467575626263 | 79.0592140403004 | 63.7744603935682 | 81.2269477373795 |
|        | 77.4769634299218 | 76.6571453659046 | 71.7546556028831 | 98.3158011081832 |
|        | 85.4420599474339 | 83.6524523974491 | 82.4263339218052 | 88.1733775711738 |
| USP9X  | 117.934830767297 | 113.198141130994 | 126.017900743748 | 191.361705136492 |
|        | 130.002385558757 | 218.217851814655 | 154.232642598588 | 141.180682718758 |
|        | 149.536891697595 | 147.945429978177 | 134.17280153232  | 153.42135363926  |
| USP9Y  | 43.0930293831497 | 50.4872122867759 | 41.528370959196  | 40.7481155008596 |
|        | 42.6022652963326 | 47.2927436772465 | 44.7255207589606 | 55.5578334877425 |
|        | 42.2577689927563 | 45.6868589181768 | 52.5930185400362 | 45.9693232070002 |
| USPL1  | 64.7766649630041 | 82.4362183543935 | 101.577767481269 | 110.666686474986 |
|        | 134.258351436533 | 100.423344358771 | 76.1869593072029 | 51.9447450229707 |
|        | 75.9909523932333 | 92.0862930476852 | 93.310557793228  | 110.13638939902  |
| UST    | 60.0793579902362 | 146.268519891864 | 137.424708183613 | 48.665578118898  |
|        | 58.4383854340181 | 126.911056987607 | 65.3694267397114 | 71.2867274976738 |
|        | 78.7182388025668 | 193.290018569713 | 250.504350952583 | 237.864776225441 |
| UTF1   | 41.4508241771315 | 38.8336427948187 | 42.9104454767916 | 41.4273122914951 |
|        | 34.806104801006  | 34.2773859804062 | 37.6036146841933 | 40.931294690669  |
|        | 39.4762546236449 | 41.7405682794166 | 40.723990462047  | 37.6557714476853 |
| UTP11L | 335.612706052778 | 223.615985483787 | 277.588692595406 |                  |
|        | 218.446312290024 | 374.167501183341 | 312.923326422701 | 206.676666936979 |
|        | 234.333935191237 | 250.585851778133 | 137.831070407907 | 175.009248614892 |
|        | 265.367588517131 |                  |                  |                  |
| UTP14A | 142.309369995384 | 137.605565493336 | 166.951916348418 |                  |
|        | 158.918242816842 | 259.906934432819 | 237.161912299581 | 170.501116810593 |
|        | 186.161177110898 | 164.780216383719 | 111.877209777434 | 144.162413121166 |
|        | 155.928417606775 |                  |                  |                  |
| UTP14C | 149.5664106654   | 165.905008152959 | 137.955007835039 |                  |
|        | 164.612971085488 | 151.088035451997 | 182.448444305445 | 138.666805923912 |
|        | 94.4618437533343 | 162.658589763207 | 152.95751212223  | 148.440257128143 |
|        | 154.232642598588 |                  |                  |                  |
| UTP15  | 54.7786516309154 | 58.7460488758053 | 62.5610562594275 | 55.6481366056639 |
|        | 70.3677225924146 | 63.2343637481705 | 52.561573697155  | 64.893664076381  |
|        | 59.8158518516035 | 63.3872214856708 | 49.532546810992  | 64.9418945936106 |
| UTP18  | 63.915453398266  | 98.2280780221631 | 64.7318794662958 | 70.506090074243  |
|        | 96.6128615107975 | 77.1317865202676 | 79.1432909353319 | 81.2850357499192 |
|        | 92.7082075328685 | 47.3791873993182 | 58.3586374083245 | 78.0586153423713 |
| UTP20  | 41.9407041937973 | 42.6939394537076 | 41.1678908661272 | 44.3425264236664 |
|        | 45.7356815244513 | 43.3234153488091 | 43.9450023643394 | 41.6825727187466 |
|        | 44.7058233759912 | 41.800198520267  | 45.270814840882  | 41.4061152929154 |
| UTP23  | 51.0013344286851 | 76.9671788424922 | 57.974826209076  | 64.9839099669442 |
|        | 80.6200293361016 | 70.9514994373481 | 68.9723126642155 | 57.1362071277099 |
|        | 58.174555206394  | 48.1392888470269 | 60.3254877099749 | 52.3304586399695 |
| UTP3   | 74.5282276561826 | 61.0468099710416 | 58.1840322066411 | 65.3191216270241 |
|        | 60.6168105212811 | 58.6838326806372 | 58.8993834673475 | 81.5582217750731 |
|        | 64.7450441264824 | 51.9247097592613 | 53.8441980932644 | 63.9371474698484 |
| UTP6   | 179.433109488671 | 170.682363891841 | 158.702003835578 | 176.816741656659 |
|        | 262.865950409375 | 187.422036538629 | 232.911951245618 | 278.140612054333 |
|        | 205.346264347637 | 153.42135363926  | 172.015856827154 | 208.379981648601 |
| UTRN   | 49.8472708021525 | 103.139459009593 | 75.2977438265751 | 85.5959901987745 |
|        | 52.0583273941813 | 80.099836448859  | 51.3064929551674 | 57.9713749600418 |
|        | 45.4799270968969 | 67.4760456862775 | 67.1477341610979 | 60.3816817102326 |



|        |                  |                  |                  |                  |
|--------|------------------|------------------|------------------|------------------|
| UTS2   | 38.7277789106124 | 37.854877390128  | 37.2237132058632 | 37.3623275408484 |
|        | 37.29566077996   | 36.8549003957283 | 40.2689687952401 | 38.6982083674007 |
|        | 40.3316153483289 | 39.3999056968598 | 40.3255073870549 | 42.5386078355693 |
| UTS2D  | 39.3100256336821 | 42.7775752471711 | 39.2707964550441 | 42.8848887336829 |
|        | 39.2968590261598 | 38.6704566269103 | 39.0458123429605 | 39.2248354955045 |
|        | 56.284748518655  | 41.4397539024976 | 37.0180934800573 | 41.3948836161924 |
| UTS2R  | 37.2474303302343 | 39.2907645923217 | 40.7620472083159 | 41.4273122914951 |
|        | 35.3327761997046 | 39.7394181011603 | 37.2892641289258 | 38.956280281655  |
|        | 42.0621425894624 | 41.4397539024976 | 35.3362091871364 | 39.1553169409075 |
| UTX    | 76.8998454389745 | 132.400225103653 | 83.955786676926  | 88.7703546775492 |
|        | 99.3596089438084 | 62.2818512646893 | 173.343091136741 | 96.213791081731  |
|        | 90.8109585999257 | 92.6888475289584 | 88.6460475038549 | 100.494620361408 |
| UTY    | 46.9939712192224 | 38.380619572367  | 39.3709357615493 | 50.6141827957642 |
|        | 37.3508690072156 | 43.006072841282  | 50.4430599873056 | 49.9332280449549 |
|        | 44.4395580493118 | 62.275808835675  | 63.3872214856708 | 56.6888826857797 |
| UVRAG  | 54.0990839134272 | 62.6984594468418 | 55.2893984191264 | 54.2886483704949 |
|        | 64.428683021978  | 61.8571521441451 | 50.8388984085636 | 55.1563703466328 |
|        | 51.1621379498014 | 51.4454142248566 | 58.0218262176065 | 65.4435809676217 |
| UXS1   | 37.4554876386402 | 44.7829632472754 | 39.9101908547397 | 39.5050383901884 |
|        | 39.7568367479301 | 42.0574848021044 | 36.8369172900902 | 42.4580504587581 |
|        | 41.1742244762318 | 37.2089297656361 | 40.2649309204478 | 41.7575097298927 |
| UXT    | 392.237227927376 | 359.465715235071 | 366.716775127375 | 487.065758294354 |
|        | 266.178061771978 | 421.971171686029 | 466.454993547103 | 388.920739791844 |
|        | 421.611594456877 | 364.141443387516 | 355.00914527669  | 491.100053064936 |
| VAC14  | 56.4729864553319 | 63.9584633070722 | 60.0517078759277 | 89.8234189405239 |
|        | 58.2780916793348 | 48.0350549043063 | 73.3042538589134 | 70.3935694362568 |
|        | 62.3102413989199 | 57.6791750431251 | 63.2684764441521 | 54.1337783761257 |
| VAMP1  | 57.6913861717513 | 57.789018502896  | 61.5364803543556 | 80.943990104641  |
|        | 58.8961770381033 | 62.6839349907803 | 51.0572809855463 | 53.565717255469  |
|        | 58.5202558613566 | 58.6439719071099 | 68.9347693115553 | 51.9141091503612 |
| VAMP2  | 108.323780226301 | 133.192618821838 | 124.777882272835 | 93.6212502203405 |
|        | 98.2280780221631 | 128.776189744323 | 64.8367546135053 | 100.813818453306 |
|        | 70.0801020070064 | 214.073500272341 | 186.759757179509 | 125.290426098227 |
| VAMP3  | 422.237766234202 | 490.652353306749 | 709.730555484551 | 534.755211286733 |
|        | 508.474794786176 | 627.914461428624 | 346.844545554188 | 386.372142079981 |
|        | 465.981133154896 | 491.8684831079   | 465.266372824212 | 549.117045813593 |
| VAMP4  | 61.8529316708431 | 55.4635297192076 | 72.2797007105795 | 64.2130157241811 |
|        | 51.3033654237232 | 67.6817814091697 | 49.540449125788  | 46.1265102517879 |
|        | 59.8037701388519 | 60.0372015630618 | 59.1443775199516 | 63.4323398447015 |
| VAMP5  | 569.244038644604 | 632.577797921655 | 392.898761909406 | 861.729405234231 |
|        | 202.627009037401 | 909.843512894628 | 270.036719921343 | 595.790464730847 |
|        | 102.457537266105 | 545.514314651238 | 669.419736252343 | 506.173054520807 |
| VAMP7  | 236.536058101486 | 227.317566600324 | 260.331534765939 | 328.46798329618  |
|        | 437.015713629277 | 336.274792875582 | 301.941928552396 | 327.844083226326 |
|        | 246.869486382264 | 146.311363191836 | 206.031918669687 | 226.567000755017 |
| VAMP8  | 1533.38581753491 | 1188.3486464341  | 1335.4111951034  | 1067.08316477623 |
|        | 743.463635670141 | 438.034341389969 | 1375.14388134842 | 2077.74475301595 |
|        | 1016.13142851085 | 1434.9271715167  | 1390.12380748446 | 1247.50618540769 |
| VANGL1 | 44.2350046179299 | 45.0905928998779 | 43.4709415392696 |                  |
|        | 44.265834798964  | 47.6884372645373 | 45.0882356578404 | 46.1634822993009 |
|        | 47.0940613507321 | 49.9162522057712 | 55.7930787690756 | 46.6442692119997 |
|        | 51.4968903591058 |                  |                  |                  |
| VANGL2 | 81.537796828766  | 228.026217504784 | 147.65688475427  |                  |
|        | 52.1201052574162 | 130.002385558757 | 68.1969125201241 | 143.590160385066 |

|       |                  |                  |                  |                  |
|-------|------------------|------------------|------------------|------------------|
|       | 129.675613712326 | 338.164006403    | 223.356945665761 | 194.896610327943 |
|       | 152.996027678733 |                  |                  |                  |
| VAPA  | 56.921728372453  | 58.7111274254142 | 52.8502823653368 | 65.6382617782876 |
|       | 86.4975836583091 | 63.9887413883764 | 45.5581356216957 | 54.9169289331775 |
|       | 61.73650350626   | 55.2828387400799 | 54.0104259381604 | 51.7382401683029 |
| VAPB  | 48.9906383294199 | 39.7835513496873 | 39.0775870687758 | 38.4208429103799 |
|       | 37.6527901109005 | 44.4619248757502 | 35.4623691645629 | 38.956280281655  |
|       | 37.3600014814388 | 35.0668743708816 | 41.1638563416981 | 40.3691324547049 |
| VARS  | 109.137372445043 | 149.375918224338 | 117.033529761587 | 86.7076796107636 |
|       | 152.456314990408 | 85.8895787710259 | 152.605418131968 | 105.125095381533 |
|       | 134.853649092952 | 99.2100734209486 | 111.656567824564 | 84.4821163646146 |
| VARS2 | 256.302432791187 | 222.957344929381 | 249.451753363306 | 212.436948565474 |
|       | 352.997455210484 | 136.711122812062 | 284.66531382201  | 223.316311787046 |
|       | 139.414044294473 | 200.318682162912 | 248.744491123257 | 178.249889756228 |
| VASH1 | 160.442808769594 | 106.762097616497 | 110.540953771795 | 243.898313340098 |
|       | 71.2787833369055 | 106.317388820963 | 54.339958888486  | 86.915098846441  |
|       | 71.3932787152381 | 83.0700092537618 | 74.2283328056604 | 54.1941919612524 |
| VASH2 | 48.3814421939888 | 69.640968387662  | 47.0940613507321 | 41.3027031037343 |
|       | 105.446338599737 | 52.9482338979681 | 91.116454717205  | 91.3607028449916 |
|       | 55.5751438859404 | 45.2556760873335 | 45.7328341667151 | 42.8864415494484 |
| VASN  | 792.45141054331  | 229.992809034971 | 126.764572234324 | 290.546420262364 |
|       | 284.66531382201  | 399.027079798213 | 88.4695322145032 | 383.853296408061 |
|       | 118.93749473833  | 251.299662213686 | 296.080833914967 | 338.164006403    |
| VASP  | 48.2549905619119 | 54.1577182755284 | 51.4308501933893 | 79.3066495980045 |
|       | 54.3116862772198 | 54.9579490132255 | 41.3094485574845 | 46.1673159982664 |
|       | 59.1514832343922 | 49.7728344236992 | 58.2315917325629 | 71.7408778060956 |
| VAT1  | 312.245547906683 | 102.926945888985 | 128.436305192918 | 225.827961496781 |
|       | 112.990752518897 | 255.087214364926 | 307.974082654351 | 338.586852166449 |
|       | 216.782658096982 | 433.447319956981 | 264.407051461506 | 226.719775835218 |
| VAT1L | 43.0930293831497 | 44.7829632472754 | 43.6670755115848 | 43.8002456102021 |
|       | 46.3150221024046 | 38.9378717994178 | 40.7910160811527 | 42.6450179841129 |
|       | 38.4344387289956 | 40.2112371512838 | 44.2925355984056 | 41.1554481567603 |
| VAV1  | 44.0328992213727 | 57.5197017161209 | 47.7737810047679 | 182.219366179899 |
|       | 58.9875400392427 | 54.8265655909623 | 59.5205055437765 | 57.037639245179  |
|       | 38.1169703906207 | 43.7303813515864 | 47.6125796208753 | 45.8546719310325 |
| VAV2  | 57.2008272301399 | 52.5868047927666 | 54.7855575216687 | 37.8442841690502 |
|       | 48.8381507187986 | 51.3886035574416 | 55.8019623191927 | 54.9919060580109 |
|       | 43.7630587657205 | 52.7972156492746 | 52.6960621424156 | 48.0350549043063 |
| VAV3  | 260.581111456578 | 177.425508756002 | 88.878414939392  | 83.014860007187  |
|       | 64.5376931825177 | 59.3618843678775 | 171.386815652277 | 75.2101993995344 |
|       | 114.719721626067 | 219.186221756668 | 170.619111196551 | 319.722393409101 |
| VAX1  | 40.2543341073001 | 38.8336427948187 | 42.0621425894624 | 37.1894304543751 |
|       | 38.0598374201407 | 38.4330755397458 | 41.1507980856436 | 43.3262148375525 |
|       | 41.7627910693483 | 44.1379638573455 | 39.7342718293432 | 47.1060577218993 |
| VAX2  | 55.6268253440479 | 43.8495248991589 | 44.8872784170036 | 40.1804147506786 |
|       | 40.5710637884029 | 39.9397419279057 | 48.9826868640753 | 47.4740726032707 |
|       | 51.8824384192988 | 46.5650556481721 | 40.8225507267584 | 43.5738557773903 |
| VBP1  | 248.691595276298 | 506.585006700107 | 356.318517117856 | 308.183340806373 |
|       | 764.571579067138 | 353.213447404132 | 467.884559162462 | 380.862719539633 |
|       | 418.693470287372 | 246.568253751149 | 259.332340491331 | 378.358853591082 |
| VCAM1 | 529.210992541911 | 131.195005779516 | 90.8236750745974 | 239.610773859055 |
|       | 107.844799332742 | 146.551751666276 | 49.2007061544241 | 281.262083731954 |
|       | 57.1266329529869 | 117.228320608065 | 153.901083585889 | 91.7579171517883 |

|        |                  |                  |                  |                  |
|--------|------------------|------------------|------------------|------------------|
| VCAN   | 1123.99110499679 | 180.475056805817 | 101.020328028769 | 677.855726232203 |
|        | 200.082941320005 | 185.703644892356 | 73.0433648756396 | 321.550107822925 |
|        | 62.0272989884264 | 119.301672388541 | 106.527144354592 | 216.063990451376 |
| VCCL   | 624.954583057431 | 497.290172759099 | 420.761600667193 | 398.641868389511 |
|        | 390.202312411165 | 1213.3477481374  | 383.705244574204 | 431.168903637888 |
|        | 1045.20336057833 | 1582.45600339543 | 1145.59111340228 | 1191.93354266135 |
| VCP    | 409.151984783973 | 311.668075784386 | 195.108184885541 | 229.159869771704 |
|        | 336.159430045964 | 318.527516338791 | 341.535750991033 | 297.187417426993 |
|        | 281.07879968121  | 291.867370164212 | 337.441212908704 | 253.527553472516 |
| VCPIP1 | 154.911548311992 | 117.934830767297 | 81.6486527718661 |                  |
|        | 145.936763882526 | 94.6432868887401 | 107.034189847828 | 90.0682241853516 |
|        | 98.3158011081832 | 117.191735492199 | 122.23209417744  | 106.398825125486 |
|        | 105.446338599737 |                  |                  |                  |
| VCX    | 37.55264801907   | 74.621822948059  | 42.5406888281114 | 44.265834798964  |
|        | 50.2163892855092 | 45.6129956328415 | 82.1144251872199 | 383.371300272181 |
|        | 52.8502823653368 | 57.0581769379589 | 51.2318935933116 | 40.3691324547049 |
| VCX-C  | 46.8141313516997 | 109.844156801015 | 42.0621425894624 | 45.4634652319753 |
|        | 65.8319449883221 | 45.0882356578404 | 138.349952332963 | 563.573152902421 |
|        | 71.3932787152381 | 80.0651801266824 | 52.2759825608835 | 61.6311118308635 |
| VCX2   | 41.1523487516364 | 45.9504618460054 | 41.187562301961  | 39.066284740632  |
|        | 42.5615835912214 | 42.6162637948382 | 43.5863537266938 | 75.9837037583871 |
|        | 42.8539910132415 | 42.8486138426692 | 40.7692130006828 | 41.3852583796138 |
| VCX3A  | 40.9999112795884 | 58.0800636554122 | 40.1572444265517 | 38.4208429103799 |
|        | 49.760344214067  | 43.6375772743725 | 57.5741400533433 | 190.242383482058 |
|        | 48.8467058855408 | 45.6271294527191 | 44.5891268059311 | 46.8129509799753 |
| VCY    | 43.0001432913058 | 48.2220547806679 | 39.779935291659  | 41.6045220683604 |
|        | 47.9128504683618 | 42.4155142987678 | 46.9929836306816 | 56.0183341691645 |
|        | 45.8325181856483 | 44.8997235283254 | 42.4162492820012 | 39.2469742642337 |
| VCY1B  | 33.4240466670776 | 33.3643994200057 | 38.2280071951674 | 34.3595588146954 |
|        | 34.7018263647985 | 39.0266821712099 | 35.9894133432376 | 38.745552403895  |
|        | 35.6139301508335 | 34.6720534245631 | 38.4689132737495 | 36.7762265039864 |
| VDAC1  | 1362.12587130194 | 1896.06380611235 | 1601.52194699063 | 983.972164685474 |
|        | 1062.93431683428 | 920.504890206997 | 1039.06999658544 | 1398.21942794938 |
|        | 1738.00955642263 | 673.002926695262 | 716.048536335117 | 1145.59111340228 |
| VDAC2  | 38.5007204246293 | 34.6306468196142 | 38.8775560911841 | 36.5393857306744 |
|        | 40.9950639693255 | 34.5886782974123 | 34.9344532055397 | 45.9604707098953 |
|        | 46.4164127487052 | 35.6208308220005 | 38.4689132737495 | 42.4607795638552 |
| VDAC3  | 1744.56688411113 | 1588.70376317303 | 1307.19925493293 | 1154.6386362     |
|        | 1618.92099084622 | 1670.01014610464 | 1357.41745370754 | 2337.7738990994  |
|        | 1245.45371155527 | 1369.94743248835 | 1191.93354266135 | 1330.19215036764 |
| VDR    | 53.2046867327331 | 43.3016395799961 | 49.1589534780597 | 67.0163226819964 |
|        | 45.9725715538987 | 39.8455060654531 | 45.8980298854198 | 42.9887069977696 |
|        | 54.5374188496807 | 49.0841460667818 | 51.8063005897118 | 51.0647893605839 |
| VEGFA  | 152.942332679485 | 118.57174795047  | 130.703767898434 | 156.69976952483  |
|        | 169.156238463327 | 72.8073366137855 | 113.964753321316 | 88.0368652545541 |
|        | 227.206974078547 | 63.2699016184868 | 57.7096546601208 | 92.563449632567  |
| VEGFB  | 283.21175871127  | 270.349279607582 | 250.176074707634 | 342.475405815033 |
|        | 325.909358171616 | 821.922096305069 | 360.668308246913 | 162.30238363798  |
|        | 210.880198736298 | 438.22469176123  | 381.533380474563 | 390.331295238889 |
| VEGFC  | 122.495387796233 | 80.4822328865    | 112.159199477006 | 91.9185612536409 |
|        | 68.4323624797175 | 113.090530993447 | 65.2361525412756 | 68.0342444360948 |
|        | 63.3694113050568 | 67.6169355376864 | 64.898351831341  | 62.0967404944031 |

|         |                  |                  |                  |                  |
|---------|------------------|------------------|------------------|------------------|
| VENTX   | 49.4151347850687 | 37.920964499903  | 43.3085358214154 | 78.5141640924736 |
|         | 38.8456942580061 | 45.9266745571724 | 37.6036146841933 | 38.745552403895  |
|         | 42.9020321355927 | 48.7414853386615 | 44.2142581488029 | 46.4499258373233 |
| VENTXP7 | 36.8611032730253 | 38.7578265341627 | 41.554942319225  |                  |
|         | 39.5637454855233 | 36.3853022034874 | 42.2830035667142 | 43.0930293831497 |
|         | 41.1575777497576 | 39.6413313949444 | 37.3687900733549 | 39.5792604499113 |
|         | 40.716553247236  |                  |                  |                  |
| VEPH1   | 42.6036491382658 | 41.3610369241157 | 45.7968648044613 | 42.5664883002833 |
|         | 43.6587492470348 | 40.3357777530419 | 44.6032218589199 | 51.0724630072723 |
|         | 35.7973685350741 | 41.4397539024976 | 41.9908237694988 | 38.5279745308203 |
| VEZF1   | 577.993850127555 | 389.481124074714 | 451.437791473506 | 435.901460958456 |
|         | 344.578407722941 | 740.423874031773 | 479.199214976757 | 404.674869177442 |
|         | 761.341795853104 | 999.13039066242  | 807.620534408416 | 779.996851709716 |
| VEZT    | 94.696942512529  | 97.0589984189239 | 124.992776922316 | 97.8309399470621 |
|         | 101.987604729928 | 137.286091889421 | 119.369994922092 | 104.822963389102 |
|         | 110.757899996422 | 92.804679821289  | 96.593956699892  | 148.3842032507   |
| VGF     | 65.3531590366085 | 64.1607001437806 | 46.7508829977587 | 46.0228732507872 |
|         | 95.6182216943758 | 47.0027453663546 | 71.193768715137  | 65.3019328668633 |
|         | 57.5883027758003 | 42.3606390470387 | 44.7114813656401 | 44.5432192783161 |
| VGLL1   | 224.373975368936 | 217.358456452303 | 146.311363191836 | 45.8844325913247 |
|         | 518.527535205975 | 103.139459009593 | 598.404003732481 | 770.715044136717 |
|         | 234.45840519702  | 264.116434279258 | 324.320137371059 | 300.186402341399 |
| VGLL2   | 40.4179476219497 | 38.9338521051669 | 43.8495248991589 | 41.8778873678551 |
|         | 41.6340461942423 | 40.8634043028528 | 42.4493032770053 | 38.8159908342801 |
|         | 44.0519245668737 | 42.1317134987795 | 41.8168470823451 | 40.4261913313642 |
| VGLL3   | 58.5759178381027 | 58.4476706144086 | 46.5650556481721 | 43.6726153508978 |
|         | 54.0126916508417 | 63.5738862549306 | 69.6301237585571 | 68.4659783447092 |
|         | 55.7522234735038 | 72.961444366037  | 63.9029785089421 | 97.2927456872797 |
| VGLL4   | 858.975085087497 | 1020.75813028358 | 736.405815842011 | 352.768184657577 |
|         | 1076.9976059406  | 430.743220222202 | 1007.03747721563 | 618.293140877956 |
|         | 975.544591158047 | 1147.19483787501 | 1151.25293766167 | 804.592753722875 |
| VHL     | 165.322633260592 | 279.632025097952 | 196.389446842567 | 163.405230398941 |
|         | 416.972264086884 | 167.999042735556 | 240.520228413182 | 381.533380474563 |
|         | 245.540041661003 | 154.551927302005 | 180.502282381416 | 194.570513601724 |
| VHLL    | 43.0001432913058 | 38.8336427948187 | 44.0451487108213 | 41.6564075217517 |
|         | 39.4693871570028 | 37.7000400506818 | 38.8417151851134 | 35.5798430594271 |
|         | 39.1790517315259 | 45.5776159432079 | 43.0016969050339 | 39.2469742642337 |
| VIL1    | 38.6454098044474 | 32.9795880920156 | 38.9790184198145 | 35.2143190355414 |
|         | 38.0598374201407 | 41.7627910693483 | 34.806104801006  | 39.0620487644635 |
|         | 38.4344387289956 | 39.8873706855774 | 43.0971787292711 | 35.7451401627836 |
| VIL2    | 3838.19449971537 | 2393.42629339901 | 3776.54943917367 | 1393.24135330226 |
|         | 892.323580265478 | 1351.49940447914 | 2435.70120719503 | 3869.93390477952 |
|         | 1845.34855798442 | 4328.723715755   | 3786.90274075023 | 2878.82618761804 |
| VILL    | 39.9697332660833 | 66.9524703393018 | 187.862483922786 | 63.1604223919703 |
|         | 61.6452971581503 | 51.0506441018166 | 72.3515874601288 | 50.9933795450314 |
|         | 96.6294773538052 | 176.861690566909 | 147.579873410455 | 119.621934826916 |
| VIM     | 3749.78281766196 | 1357.41745370754 | 2083.69812106867 | 5438.34345794521 |
|         | 955.088515235485 | 3618.78958408675 | 448.648042823935 | 975.544591158047 |
|         | 183.336550845401 | 1726.90584784425 | 1801.44003951248 | 1387.28483887704 |
| VIP     | 46.1673159982664 | 40.3946758935842 | 46.5650556481721 | 43.8002456102021 |
|         | 37.1935273352159 | 46.3715909653832 | 42.1157692936428 | 46.0633179231318 |
|         | 44.7058233759912 | 41.1222709786153 | 46.5952288260503 | 45.0035308952466 |

|          |                  |                  |                  |                  |
|----------|------------------|------------------|------------------|------------------|
| VIPR1    | 75.4732674021193 | 301.867441371793 | 430.283061862756 | 83.1614238528477 |
|          | 191.223290474417 | 98.0473811574767 | 177.27613997459  | 154.248946683126 |
|          | 184.77921410613  | 945.57360324722  | 648.885062676884 | 688.612748336336 |
| VIPR2    | 58.9201382292404 | 43.1805016690297 | 36.1042012504758 | 43.6726153508978 |
|          | 42.4864576619427 | 57.4777075615651 | 37.9430145836712 | 39.9576138799997 |
|          | 39.853866204927  | 59.6863210839828 | 95.8149149211251 | 52.1186591838715 |
| VISA     | 47.8249696958403 | 51.1740855632044 | 54.6820069269589 | 43.5627649099623 |
|          | 68.9766943946607 | 42.8598805316863 | 54.8074655158941 | 53.2046867327331 |
|          | 50.3245489035833 | 42.8936990772838 | 46.2560238004757 | 56.361708620372  |
| VIT      | 40.6062943725118 | 42.2114134935898 | 41.3708420203838 | 37.9230440150891 |
|          | 43.0723817756832 | 166.25909484446  | 40.1613888954735 | 37.7217193704498 |
|          | 43.1180113655693 | 84.7642634532073 | 79.8701900696361 | 62.6459502069189 |
| VKORC1   | 1582.45600339543 | 433.447319956981 | 647.297964303385 |                  |
|          | 959.549658414082 | 1354.50256889331 | 1393.24135330226 | 505.294880430281 |
|          | 1029.12917222294 | 400.760646547012 | 996.520340280883 | 737.604036996153 |
|          | 651.969296681551 |                  |                  |                  |
| VKORC1L1 | 168.20241447621  | 194.079940066252 | 184.833679989936 |                  |
|          | 145.391705645319 | 252.949225605064 | 146.814825143817 | 174.985336606027 |
|          | 239.272650332949 | 221.22852405053  | 90.1696131791736 | 107.741669334989 |
|          | 140.559370165331 |                  |                  |                  |
| VLDLR    | 68.4352167527791 | 48.0296332183129 | 64.0759817636265 | 45.334106390212  |
|          | 51.0107745412152 | 135.41852974791  | 49.4573631027613 | 49.0145368354835 |
|          | 92.6230008876347 | 61.5635554619635 | 58.7389869173495 | 110.202401893789 |
| VMAC     | 44.9896851005259 | 39.0102066700839 | 43.0971787292711 | 44.7980740332174 |
|          | 45.4751076037511 | 43.1826328292558 | 41.8315602975157 | 44.5029690493211 |
|          | 44.7058233759912 | 42.3606390470387 | 50.0808824383821 | 44.8372404608604 |
| VMD2L3   | 46.3390850717989 | 43.7644428186265 | 44.4311655729487 |                  |
|          | 51.0175677516029 | 41.6806984441849 | 47.2009420656854 | 50.8388984085636 |
|          | 42.4580504587581 | 43.2761454096265 | 40.7063426028871 | 41.0808257270221 |
|          | 41.7575097298927 |                  |                  |                  |
| VMO1     | 78.3851687801705 | 45.4882438975269 | 39.2707964550441 | 77.7973642829228 |
|          | 58.1242391848692 | 57.4777075615651 | 45.7452456977857 | 69.3468840908665 |
|          | 46.2027193115397 | 42.9866214102525 | 48.5292718280498 | 52.1186591838715 |
| VN1R1    | 34.6977013306396 | 42.8542642792862 | 46.4569566520107 | 38.9534635879195 |
|          | 50.7615314686244 | 47.2009420656854 | 45.6042625176633 | 43.5544347011646 |
|          | 46.8873421271259 | 38.2069499294002 | 44.1148826235374 | 45.2783024981315 |
| VN1R2    | 41.483412492426  | 40.2093230376545 | 46.8873421271259 | 48.309866878365  |
|          | 44.147557390293  | 42.357910063876  | 41.9393838138203 | 43.6434576713809 |
|          | 43.6670755115848 | 45.6868589181768 | 45.447310733898  | 43.7672102682067 |
| VN1R4    | 43.9309845324767 | 40.9731067463382 | 39.2707964550441 | 40.9607305725196 |
|          | 38.745552403895  | 37.3799542961839 | 34.2773859804062 | 43.844855336215  |
|          | 40.3316153483289 | 39.5637454855233 | 35.860430241131  | 35.5523662009011 |
| VN1R5    | 38.5007204246293 | 41.2598458726002 | 39.4710743516517 | 40.8681871019812 |
|          | 44.0451487108213 | 42.4580504587581 | 36.5352572191451 | 41.1575777497576 |
|          | 40.8970401536578 | 45.0155543555707 | 46.3370338074996 | 43.0930293831497 |
| VNN1     | 58.3702889417801 | 48.0296332183129 | 53.4743535852344 | 79.7937658787441 |
|          | 42.6022652963326 | 51.6053353177789 | 57.8870110456492 | 40.831207953647  |
|          | 51.6731332961917 | 45.6868589181768 | 48.2050207071554 | 49.2064066614865 |
| VNN2     | 48.9600850533759 | 48.2883694323339 | 48.8584917918986 | 245.923368125413 |
|          | 44.7114813656401 | 90.6431915380214 | 111.880226272362 | 42.4864576619427 |
|          | 40.8503192605024 | 45.6271294527191 | 49.9338905397767 | 42.7782216342806 |
| VNN3     | 44.3754281580557 | 40.8880530359822 | 40.438572186867  | 82.2766822827861 |
|          | 40.4098450813524 | 47.3289285415289 | 48.5721799977026 | 37.7157152895625 |
|          | 41.2397693523949 | 39.9948390976317 | 41.1367478979484 | 41.2870505273664 |

VPRBP 52.9240098541574 60.3928833351886 54.9944485073259 46.3203995372658  
77.3931945683613 60.877229406755 68.0157730844432 50.1833483241864  
73.5541045639348 57.8585041080995 59.7269454048338 56.361708620372  
VPREB1 37.7384958256497 39.0102066700839 33.0260566875355  
35.9521941716188 37.7576900881741 39.132725377815 36.9355798143571  
42.9301944191913 33.6902293666089 40.3235655331796 38.6662194645633  
42.2577689927563  
VPREB3 40.9558083259517 54.8979897528792 43.0016969050339  
140.894046694804 47.9128504683618 43.0860383229288 42.4939802311136  
75.4935574755043 43.6670755115848 37.5343260962758 49.1067959632109  
40.1700117452801  
VPS11 53.1309801459151 51.6060290544385 57.6371756925687 73.8480604979804  
52.8190882379316 61.6219790276408 58.7585623394335 70.355653090662  
59.5093038629766 76.4439037944547 59.4188882103773 56.1875519519366  
VPS13A 45.2508153774277 56.1355483199198 48.1727467920205  
42.7628396725929 45.5346153506065 56.1671440556142 49.7462241109067  
58.4200819624972 52.8264142735929 58.8856060454401 66.8580367262895  
63.810395129507  
VPS13B 43.1062482379279 43.9783383422823 41.4757223430746  
43.3788884936779 41.7929491793697 41.9543948167375 39.1878770155069  
44.6484005362281 44.1265264363603 42.146814387365 42.589641010388  
44.5029690493211  
VPS13C 67.9531693869426 63.3667304749164 62.6532574724345  
100.100720553498 55.6069214673486 70.8674195845729 70.1845639720491  
101.468662074178 53.5847837163876 79.3427669741608 94.428252478069  
77.0145316377298  
VPS13D 45.6989664108554 47.4076235350059 48.9614101792105  
48.856176220627 41.1493778437527 50.2513819310656 43.8664428040913  
41.496883371243 50.5381435455868 63.9743186148507 49.0361180089431  
56.0121021290387  
VPS16 149.185115531381 105.796515736125 161.553725645675 132.473918053428  
149.375918224338 95.2956103624468 113.039124313172 105.247736284747  
88.9641595603127 124.280024888206 109.23113111292 104.573463811298  
VPS18 211.485592971588 95.913238814854 70.7238101239421 227.986601498805  
116.778318821987 105.621640443267 170.720099897973 208.3497732496  
120.123385036416 161.793366042179 158.334581991361 88.3636380348802  
VPS24 110.048921728774 151.36347984261 139.66584446954 102.085154509866  
119.72858253254 260.910912798295 116.490154128114 91.4446109489387  
117.033529761587 107.987729161223 91.3112603277315 117.149897485203  
VPS25 160.605530211736 164.547318765586 211.964446599144 136.711122812062  
214.586915093492 145.676955166566 214.073500272341 130.184962393833  
207.464632062656 130.261747462753 117.689172019617 137.081911344143  
VPS26 49.7827734675743 60.7495043977707 54.1637401903523 55.4180794172794  
60.1730663840476 68.3234331335073 57.4047331041592 56.5914743235484  
87.8724689898823 73.1407519625966 56.6086202928268 66.0224755625662  
VPS26A 461.607803139448 486.044304392285 567.675954219815  
585.421238639853 665.510487460287 778.723771259404 541.105845300009  
411.981987305512 1405.20888023653 692.630044242985 564.19772079287  
707.4124863603  
VPS26B 184.048982286364 151.936097714553 167.430013807712  
133.810601514962 170.048690747909 120.789309915619 134.024691118762  
165.440751113862 122.405413080836 135.169625016001 138.486962379511  
140.648209468568

VPS28 389.422882761332 663.904584382358 477.023373302787 328.855843739232  
258.913621521866 339.679549262298 367.158502379417 268.144525192544  
434.523449093691 482.5816387921 464.495132469257 337.736535374405  
VPS29 732.454837219705 606.761670821739 621.012072500314 742.726253630865  
623.574706535278 669.776067547468 828.403901345618 437.148137705103  
675.079525434102 427.363555286404 371.280311231075 753.976423227915  
VPS33A 100.83436298853 104.305801811472 154.752920877816  
123.978615472736 124.559758809231 106.78552222475 142.945182805248  
102.085154509866 101.103458852775 68.0556717366572 64.5722284870633  
83.9236799134394  
VPS33B 147.719172115976 132.588447812638 89.5597629049747  
115.132600341395 89.6313467455698 99.1667512831715 96.7125250803971  
121.510087314197 109.828760284519 126.764572234324 110.287699369482  
117.934830767297  
VPS35 780.708896888794 1716.82239359769 1455.64106630257 560.802447943839  
818.290793784784 1106.57048989685 1876.51621222292 615.442484911026  
964.268294825556 669.419736252343 711.773459577386 1017.1803754111  
VPS36 136.530734456168 147.017279035061 159.268245287939 133.930007857002  
91.5258329186709 162.628603963754 87.455991111513 87.4850071876743  
124.350816245276 269.492542909259 256.071638089438 231.198764780818  
VPS37A 73.5788549535062 71.9162507601624 75.0377156190383  
98.0967511777819 87.6763065012524 91.7437837246405 71.9000032422349  
72.4834467838798 69.805066579191 84.2960453806012 89.0684909049451  
111.42402759245  
VPS37B 605.145228948011 512.255695437272 272.545033107746  
502.435496018532 255.324974349269 229.159869771704 503.793770799548  
403.243939813779 531.529022249333 283.111920665176 259.958369064691  
209.363955566338  
VPS37C 968.405745860353 1032.44965920118 879.708199333257  
882.105892529265 1027.59400018637 716.754656773542 1141.25078954012  
1080.43016747082 734.705859548078 839.850453078119 966.803172864162  
724.881002237334  
VPS37D 182.06733830953 77.4676205299631 70.4794854241035  
70.0402992940342 67.7155610106537 98.9560329133205 154.455976468088  
249.195312452368 225.725485439572 87.7918574811458 110.818741525514  
94.2275161759277  
VPS39 105.914573205761 89.0203733091224 92.6672238953636 84.4422623834916  
77.4769634299218 106.951862149262 98.5663841503803 99.6392844274488  
81.0169370911764 135.007055711266 118.720812623965 109.748417117462  
VPS41 297.950627905767 188.236842521312 244.678323059428 299.706257810523  
202.751918610777 211.279069257808 208.269627315418 321.949943388959  
178.904972763325 339.210875653066 289.05213385509 226.804294585045  
VPS45 263.21493129287 174.718984988254 358.402309513947 157.312247745825  
255.762638489554 292.156216736355 168.345356470411 306.234270542664  
245.996655628334 216.004059887037 206.931452638325 241.455752070163  
VPS4A 109.363566993814 116.805376997045 139.294987640071 100.606802642042  
99.571118823509 128.873145026756 121.542387231625 147.875578127733  
120.401643722713 134.601217321316 133.781790945099 105.446338599737  
VPS4B 272.36028618845 801.694261678224 617.539783972955 446.019275317482  
189.137593177772 361.945511835039 271.529471399941 187.422036538629  
470.861392566833 421.611594456877 447.348799009312 415.15150032168  
VPS52 233.577690223567 243.27954361539 252.097980496533 155.564141715819  
217.721787448311 169.367702213351 237.237762964658 150.649377863375  
191.454637685756 210.73006676203 225.589127792587 168.092241790885

|        |                  |                  |                  |                  |
|--------|------------------|------------------|------------------|------------------|
| VPS53  | 50.7390160399184 | 49.2934904960601 | 57.50915811428   | 40.1804147506786 |
|        | 57.6791750431251 | 48.6621527194963 | 45.4799270968969 | 44.1311654985682 |
|        | 46.2027193115397 | 45.0155543555707 | 51.3861659123096 | 52.0359304386476 |
| VPS54  | 63.516926797099  | 64.9959712888709 | 69.6370071212543 | 67.8233625051884 |
|        | 79.8701900696361 | 72.7934987008399 | 51.5967098638347 | 71.2327757437041 |
|        | 69.0037087543684 | 63.197604174872  | 64.9959712888709 | 62.2025996860055 |
| VPS72  | 250.621261212308 | 194.570513601724 | 198.129308943666 | 134.099684731177 |
|        | 283.563531065269 | 286.456276735451 | 391.83348187444  | 400.8670859408   |
|        | 193.875712862166 | 167.678403380953 | 208.269627315418 | 143.962643695789 |
| VPS8   | 122.720768249799 | 129.299077627671 | 102.228965899392 | 191.955732544426 |
|        | 124.422215459182 | 126.838679504229 | 96.7125250803971 | 136.650986373497 |
|        | 135.553887060537 | 145.050655626219 | 128.146059846414 | 134.185571685143 |
| VRK1   | 75.4732674021193 | 66.1863819168127 | 70.3613168347492 | 65.7321440516177 |
|        | 108.168107241759 | 79.4053001255904 | 110.223625398261 | 182.343696914747 |
|        | 83.1874704625702 | 84.0691608193405 | 68.4261608261522 | 76.1453055441256 |
| VRK2   | 63.3717459766798 | 50.8812920005251 | 49.4573631027613 | 59.2778887402357 |
|        | 49.8304479381623 | 62.0660509811111 | 59.0457625163577 | 71.1607965028029 |
|        | 68.5599263000733 | 49.1928206164702 | 49.4593570700221 | 51.4968903591058 |
| VRK3   | 63.499841172847  | 113.82565808481  | 108.04376659067  | 100.548557273012 |
|        | 104.27034824534  | 83.8419777255838 | 127.337191367244 | 94.5358147295719 |
|        | 112.565968152932 | 84.6563174894574 | 83.2652824564032 | 84.2158827857221 |
| VSIG1  | 36.2496364442264 | 43.0971787292711 | 58.9135553403521 | 36.6501141438378 |
|        | 35.6434124419782 | 40.8634043028528 | 39.1539892144371 | 44.4031868028216 |
|        | 41.2870505273664 | 46.5650556481721 | 48.8744644207821 | 41.5536168238478 |
| VSIG2  | 486.044304392285 | 2365.73772015255 | 2474.22199172028 | 60.7741670229412 |
|        | 633.385474385877 | 159.22638189198  | 779.028332922339 | 1683.24873205783 |
|        | 1120.83891847181 | 2101.59244895554 | 2498.54878472152 | 1626.71747158994 |
| VSIG4  | 69.3418521417182 | 56.5319193881205 | 58.9135553403521 | 229.584451980272 |
|        | 63.3638417360105 | 151.36347984261  | 63.928488869459  | 52.3068458655445 |
|        | 45.9227107476843 | 58.3813211109331 | 54.113533179847  | 145.335751135441 |
| VSIG6  | 51.8781065691038 | 45.2556760873335 | 38.7745734037492 | 47.9915414951747 |
|        | 48.6224651100733 | 49.3172204533818 | 47.2927436772465 | 54.3820590274321 |
|        | 44.5303781239209 | 47.2299678280724 | 43.5710871617107 | 47.3172462673426 |
| VSIG8  | 50.5670783769975 | 41.7337506166619 | 60.8942621888353 | 48.1662933382789 |
|        | 57.6791750431251 | 47.2927436772465 | 55.5578334877425 | 58.0892402609917 |
|        | 56.9320717885002 | 57.8585041080995 | 44.8872784170036 | 42.8864415494484 |
| VSNL1  | 50.0466349801009 | 40.5400384479766 | 39.0470836345045 | 43.074472921841  |
|        | 41.7426502114261 | 39.0266821712099 | 35.8517125118857 | 45.7003272484265 |
|        | 40.8420925848403 | 42.6366765186182 | 42.6776449468246 | 38.8964578286293 |
| VSTM1  | 42.3433931248155 | 48.1627097465883 | 42.4580504587581 | 62.3936376596431 |
|        | 41.7929491793697 | 42.157627240486  | 43.9450023643394 | 40.6171774724171 |
|        | 42.1594905198929 | 44.3648993568405 | 38.2795150354677 | 42.357910063876  |
| VSTM2  | 37.9387791625384 | 43.3458769998118 | 42.0621425894624 | 42.6913548400127 |
|        | 48.0234896130991 | 41.3553369544097 | 45.1017494688414 | 40.931294690669  |
|        | 41.5635499110307 | 52.5522545249206 | 46.3370338074996 | 41.1554481567603 |
| VSTM2L | 74.3135387703106 | 42.4493032770053 | 40.0998167098057 |                  |
|        | 43.1847628331565 | 49.452985143568  | 42.2577689927563 | 58.3675164086197 |
|        | 72.2610650652674 | 47.4699236780425 | 43.6033221838149 | 52.2759825608835 |
|        | 41.6550823405646 |                  |                  |                  |
| VSTM3  | 45.2875173643252 | 44.5152708955623 | 36.5474283500601 | 59.0965219753805 |
|        | 42.9090346219023 | 40.650742261428  | 43.3262148375525 | 44.8997235283254 |
|        | 40.9901805728485 | 39.4710743516517 | 38.3684202018524 | 42.4607795638552 |



|       |                  |                  |                  |                  |
|-------|------------------|------------------|------------------|------------------|
| VSX1  | 39.1878770155069 | 40.0952076421149 | 41.2365089689635 | 39.3413292410146 |
|       | 43.588778866215  | 39.871711263355  | 38.5066108855005 | 38.2233438809487 |
|       | 38.7578265341627 | 41.5852317867787 | 39.6403089864678 | 38.9834959368496 |
| VTA1  | 153.61084474789  | 185.72957253374  | 141.48637125542  | 114.124846622876 |
|       | 143.399636653204 | 127.115038236278 | 148.178364767218 | 107.232979387172 |
|       | 125.588228083829 | 112.17141283151  | 107.741669334989 | 89.4747568145717 |
| VTCN1 | 267.608189207303 | 47.4740726032707 | 43.9450023643394 | 53.593974682612  |
|       | 90.5359675350156 | 45.3882138838137 | 646.791777335656 | 99.9896394343368 |
|       | 144.227861902786 | 143.962643695789 | 111.874193363836 | 97.5534379346899 |
| VTI1A | 39.266565827316  | 40.2493681589104 | 36.1042012504758 | 44.265834798964  |
|       | 40.8873907150245 | 43.7630587657205 | 41.1507980856436 | 41.6466169548846 |
|       | 45.3756389170606 | 43.1839109702714 | 37.6484782516569 | 34.806104801006  |
| VTI1B | 97.2535496140648 | 66.7256057011273 | 86.9032093551446 | 65.3191216270241 |
|       | 54.4586176399381 | 76.889690218685  | 70.7238101239421 | 65.6914955077809 |
|       | 73.7873098190297 | 59.5785089386245 | 75.3969721155153 | 94.9831937714438 |
| VTN   | 40.3478825593224 | 40.2493681589104 | 35.8265993915844 | 40.9607305725196 |
|       | 37.0526522140242 | 49.9699131196797 | 40.1235656101329 | 48.87875862356   |
|       | 32.7294532998931 | 38.2069499294002 | 38.745552403895  | 39.8497227447888 |
| VWA1  | 104.936456561176 | 75.1701698483856 | 123.480244775709 | 90.8188865732032 |
|       | 68.6627996695828 | 104.725576313447 | 95.2218627805387 | 133.541341560868 |
|       | 90.8920620927752 | 122.924027019519 | 112.506613718654 | 85.7390214986603 |
| VWA2  | 50.0466349801009 | 46.4385386401326 | 38.3166554965434 | 33.5578650644246 |
|       | 48.2748123114598 | 37.0180934800573 | 52.8496345990125 | 49.3880946790306 |
|       | 41.3803269429468 | 51.7594352155304 | 39.9899430628542 | 36.7762265039864 |
| VWA3B | 39.7576136507593 | 42.3550738181144 | 38.7745734037492 | 37.29566077996   |
|       | 41.9842695818285 | 39.6251842352088 | 40.7910160811527 | 39.0620487644635 |
|       | 38.1169703906207 | 40.8049408996274 | 43.3085358214154 | 40.3691324547049 |
| VWA5A | 51.342502154612  | 63.5222607845861 | 79.8773095098789 | 54.6089451252049 |
|       | 46.9058511192313 | 116.066916521887 | 59.7744650739434 | 63.1604223919703 |
|       | 57.9279989359711 | 63.3006977162657 | 66.2933902512473 | 89.7661004674344 |
| WVC2  | 50.315768338317  | 47.3536182445315 | 47.0940613507321 | 45.5869891570251 |
|       | 46.6397391251762 | 42.5660695551615 | 48.4859552186772 | 45.9604707098953 |
|       | 40.5912213523345 | 43.9450023643394 | 44.6286581923295 | 45.0035308952466 |
| VWCE  | 45.4799270968969 | 44.0409178714232 | 60.1874689914535 | 36.7892997857376 |
|       | 96.143327683221  | 37.9003288112261 | 50.8388984085636 | 42.2577689927563 |
|       | 42.9020321355927 | 40.7063426028871 | 47.4630625313159 | 44.0451487108213 |
| VWF   | 1205.82775512007 | 1473.52943897204 | 3176.96480659196 | 3143.97163345458 |
|       | 1007.03747721563 | 1679.12630849964 | 303.93332785291  | 1114.15989325456 |
|       | 367.685570437603 | 661.880230068693 | 1357.41745370754 | 1418.94307844471 |
| WAC   | 296.664472126617 | 245.630020408551 | 228.439524702578 | 261.326713935356 |
|       | 167.449422388453 | 343.591727067749 | 164.146682514925 | 287.121456559795 |
|       | 323.095468495074 | 244.837105178705 | 249.679512440891 | 221.22852405053  |
| WARS  | 585.237875919074 | 345.529757315326 | 277.878824242495 | 1219.52011418558 |
|       | 217.39432336811  | 386.934057829091 | 245.853111206859 | 492.13077103258  |
|       | 290.710970844525 | 250.308866488702 | 271.900886756161 | 208.189151365575 |
| WARS2 | 43.3638918705225 | 66.8693882433359 | 81.5782824513693 | 40.7481155008596 |
|       | 50.0580547772867 | 45.3882138838137 | 62.1970616836737 | 41.0381860307445 |
|       | 102.87193290903  | 39.1621898366355 | 39.2542963855807 | 70.5322939116406 |
| WAS   | 174.685146336531 | 320.232392398509 | 279.226221967169 | 1430.73068989193 |
|       | 139.472956453414 | 363.527881831453 | 309.494842450837 | 177.958475301951 |
|       | 70.8606919488782 | 100.638737800637 | 126.204310123186 | 97.7140868175135 |
| WASF1 | 41.0608773166058 | 40.5400384479766 | 41.2679739649179 | 42.6913548400127 |
|       | 41.3387790895716 | 41.554942319225  | 44.3440839686558 | 41.7419877611072 |
|       | 38.9834959368496 | 42.0621425894624 | 43.9063490244748 | 38.6454098044474 |

WASF2 163.028918580618 248.482699989877 151.205675888138 216.358862796367  
157.543887960599 278.629995328901 187.086662645246 228.660261263355  
184.859183550225 273.170084535508 188.582370265555 209.794541970107  
WASF3 67.3816715975056 68.9833517108866 77.1614179978243 86.3663084195994  
115.530384771495 219.431561967403 84.7782034884529 60.2691630545162  
47.9035532886869 100.756165194192 138.349952332963 113.051477801522  
WASL 511.261925898948 576.830397705584 612.642648319981 277.325795311848  
579.482255191456 553.707482409148 390.202312411165 696.113365766871  
1323.73429724066 909.843512894628 927.921867516809 1035.67547271468  
WASPIP 104.059057437473 103.707931766117 86.4154945670734  
279.632025097952 68.6627996695828 145.170590045628 69.1414574152997  
73.5950442915143 48.2123120250343 78.839411865787 75.2391243965793  
93.7924763988692  
WBP1 96.6833301748676 105.34055372228 133.576489624155 62.6048727240291  
96.7351644023249 88.4695322145032 89.1012752492647 106.398825125486  
109.492219458129 107.122319086614 102.993620677265 97.1634390603131  
WBP11 259.855509977658 345.084002073846 254.579513401792 212.062417120966  
271.275703732022 245.769212889294 289.716911324484 301.728842562175  
352.997455210484 235.613437037284 220.054040993848 240.02527500313  
WBP11P1 38.1644569189523 40.4359177791566 40.438572186867  
42.6913548400127 40.9355378385932 40.3357777530419 41.4742337714895  
40.0873854338318 39.8089320768344 39.5317722761104 40.2330489360997  
37.8190258198844  
WBP2 2243.24648907474 2755.23573327276 2545.03032507597 2934.35616793443  
1707.92349760322 2225.65559724391 2966.53151444114 1342.10592868516  
1886.05449875658 2633.34100695103 2575.86919902296 2354.00192115549  
WBP2NL 38.304249186058 38.0226905622357 33.9435456570176  
42.6913548400127 38.9496515344837 35.7034203372528 36.8369172900902  
39.6474008369935 37.6383530120621 41.3321861371202 35.860430241131  
37.8490162439785  
WBP4 142.066425511614 113.929486370331 87.455991111513 125.333208461509  
84.0996028277101 200.019523376661 111.025105784166 89.3868257841517  
107.961407367823 156.02592319461 182.866502637283 200.144817111902  
WBP5 382.538365722661 245.691073028699 491.100053064936 345.36940514835  
211.926421068313 286.927016665685 459.92905629125 425.60854194674  
410.329983506955 280.920208331594 312.648013979436 604.357590751951  
WBSCR16 61.4242242807301 63.0186614577099 59.8273072817267  
52.0470560622094 74.3523005665671 64.6374507338031 69.6975740412402  
62.046151104685 83.014860007187 59.6105564219031 64.1267046511632  
61.1022920882065  
WBSCR17 44.3355304829989 43.5182502375207 42.640829914102  
43.4410741327254 44.147557390293 56.9320717885002 39.0458123429605  
46.1673159982664 41.3803269429468 49.3000844711116 48.6184776976167  
48.6037684272115  
WBSCR18 51.1740855632044 81.7367617812869 51.5292723244077  
45.8844325913247 72.5027069303875 58.4435847520801 58.7585623394335  
68.6704961638492 69.8899273527731 51.2318935933116 62.5036823572932  
57.934622029119  
WBSCR19 41.2696112256244 41.7651272076914 42.640829914102  
41.7205614507906 43.6872301616191 41.3155579881328 42.1607322031054  
43.9524079682061 41.3418399745288 43.8783254873901 42.3346523186171  
42.7211272990786  
WBSCR22 683.75696650704 370.917477324773 452.2453761868  
287.565588186962 640.78586776574 323.095468495074 573.394745674984

|        |                  |                  |                  |                  |
|--------|------------------|------------------|------------------|------------------|
|        | 735.60603239712  | 919.542051089664 | 394.990145259101 | 563.573152902421 |
|        | 433.89783033465  |                  |                  |                  |
| WBSR23 | 47.2862299990938 | 36.2103905554984 | 36.9795961564828 |                  |
|        | 35.6027791404152 | 40.8873907150245 | 35.8227939208521 | 38.1793598983615 |
|        | 37.86982638952   | 34.2973261206803 | 32.7876527533679 | 36.6298807161755 |
|        | 43.4709415392696 |                  |                  |                  |
| WBSR27 | 63.915453398266  | 42.8542642792862 | 75.0377156190383 |                  |
|        | 56.0794100106654 | 49.32293280121   | 56.7429967489965 | 87.8746766762445 |
|        | 53.3094843669564 | 72.2527203451447 | 100.344513700137 | 90.689813277023  |
|        | 157.518879763075 |                  |                  |                  |
| WBSR28 | 42.6036491382658 | 40.4359177791566 | 41.9666541498638 |                  |
|        | 52.1201052574162 | 42.1650127805175 | 46.0364000143537 | 47.4439407315335 |
|        | 44.6107027295193 | 109.654559065946 | 47.611018474151  | 45.9104478407175 |
|        | 47.1060577218993 |                  |                  |                  |
| WDFY1  | 652.480459437977 | 294.090159716249 | 440.728435508514 | 474.729653426958 |
|        | 296.080833914967 | 262.024495926094 | 270.78959225422  | 600.34379987143  |
|        | 483.416873464931 | 768.354209323884 | 551.1195044975   | 581.396808977873 |
| WDFY2  | 91.6253858792439 | 95.4942268742467 | 157.020685801527 | 169.99300253813  |
|        | 85.2849531543957 | 99.2749350936362 | 95.9298109273155 | 98.0967511777819 |
|        | 94.4421289055611 | 106.049736669661 | 106.340844838265 | 89.0727613846343 |
| WDFY3  | 41.2707023359545 | 48.6157847333895 | 46.317756659262  | 47.571781270273  |
|        | 44.8248621498677 | 43.6960408897486 | 41.5421429082231 | 46.2779564481158 |
|        | 43.1087085278313 | 42.9413736814915 | 44.4408504417009 | 38.3757040629343 |
| WDHD1  | 43.6706764143908 | 47.5934444802346 | 46.2625470410195 | 47.2797818740024 |
|        | 46.9143029518644 | 49.2731519807085 | 52.0942589368478 | 47.428201097025  |
|        | 51.5612024992699 | 45.2556760873335 | 45.4799270968969 | 47.4685398161036 |
| WDR1   | 933.968759959712 | 1511.33844030783 | 994.404707955031 | 1061.61186520958 |
|        | 680.837950890159 | 1513.74711975248 | 1103.90449800536 | 631.632335640448 |
|        | 1009.47177197543 | 804.592753722875 | 1065.70206468134 | 1204.34388579291 |
| WDR12  | 169.168332370229 | 183.613579501306 | 172.990533342251 | 122.548989126048 |
|        | 282.961489041903 | 134.994839576312 | 167.999042735556 | 173.08677862231  |
|        | 173.711189659585 | 108.63277045284  | 119.209804934394 | 150.925721934159 |
| WDR13  | 241.51647940043  | 255.521720396044 | 332.745139672471 | 252.280105035425 |
|        | 207.051626712671 | 286.538414026118 | 364.337811621248 | 305.786520619504 |
|        | 316.831358204198 | 358.879599295105 | 394.073743195755 | 254.82779318297  |
| WDR16  | 39.266565827316  | 36.0366673493555 | 33.8931885087447 | 37.4699641111076 |
|        | 38.307092962865  | 37.3799542961839 | 36.7356360093603 | 39.9955307208157 |
|        | 37.6685064050907 | 37.5583886316038 | 40.3248602167143 | 43.0456011922275 |
| WDR17  | 42.8482181313226 | 41.9894412416874 | 43.3085358214154 | 43.6275678329783 |
|        | 39.6037514046494 | 40.244271403831  | 45.2806199505029 | 42.2577689927563 |
|        | 42.6366765186182 | 42.7211272990786 | 42.3440399888092 | 46.4499258373233 |
| WDR18  | 276.666571115104 | 450.008356194664 | 281.602712448925 | 226.567000755017 |
|        | 678.684833360104 | 204.064420098696 | 356.318517117856 | 350.584135047249 |
|        | 344.314901683001 | 291.021345839327 | 313.046160403661 | 209.038077542654 |
| WDR19  | 134.285947677624 | 137.302487233881 | 138.036631806718 | 125.801834682035 |
|        | 779.996851709716 | 244.466972245417 | 183.2003374677   | 162.049698241573 |
|        | 121.142787642824 | 221.450737998571 | 182.576662575358 | 164.780216383719 |
| WDR20  | 79.2665546280232 | 70.9567983915276 | 94.0140258999054 | 82.3591293655947 |
|        | 80.257554904218  | 104.17651993553  | 83.2925226467532 | 73.2037966614621 |
|        | 94.3953345963359 | 120.771048750176 | 113.929486370331 | 116.617120294216 |
| WDR21A | 117.612004923867 | 66.5864907685351 | 114.734157967466 |                  |
|        | 55.4180794172794 | 92.0958762013613 | 104.17651993553  | 66.3209349903185 |
|        | 86.5926014007562 | 145.419126322238 | 97.6023731094756 | 101.008449241109 |
|        | 84.5354986509039 |                  |                  |                  |

WDR21B 42.3433931248155 46.8954576545929 43.6670755115848  
51.5913529948887 40.4639532172338 41.6590564937735 46.8613212048981  
61.8665316900291 50.7619345314571 49.7259371799014 46.4205654140754  
48.3648494350286  
WDR21C 41.1523487516364 40.5400384479766 38.1421709520616  
38.8495095797881 46.1804647841331 42.9695585740813 48.1747307200218  
39.5466975353131 44.7058233759912 46.5650556481721 38.6662194645633  
46.6397391251762  
WDR22 168.640033281185 81.3696465421645 100.205124008648 116.852483297949  
82.4164506744 153.797431763616 102.913039837094 125.197314240529  
94.8408264309872 200.401133392259 141.261334415286 142.492693744683  
WDR23 81.6486527718661 88.1886407127943 85.0275638433103 87.2643859655159  
83.1143182398772 88.5207664670319 86.754538970161 93.8009890556664  
84.9447584832739 116.951729886784 110.181320436731 100.865270615385  
WDR24 76.2368668439875 112.146987452306 88.4211119834434 55.0604256312495  
98.8537074610939 47.3791873993182 77.5813459454823 55.1933004802607  
75.5681913475287 67.3934788330567 78.7260936224802 57.445796273665  
WDR25 69.3418521417182 58.174555206394 63.5107036952143 55.0604256312495  
43.7517118200398 65.3801154142721 52.8496345990125 47.5950227477807  
61.3733228199803 64.0162246399972 95.5325488969517 65.0495374451854  
WDR26 99.8231023149756 89.7093249557939 155.099281008688 113.783910320605  
102.49785018292 100.423344358771 62.9165938167938 100.696072546592  
99.3797043236938 125.243627451767 125.494065483032 148.944852825695  
WDR27 123.138085708441 79.4710406831985 151.266092912661 69.8314582428552  
80.6200293361016 62.5542376788358 67.7965120293445 70.0697974278875  
48.5792058061372 173.391542207362 141.852330109472 126.620595729562  
WDR3 49.7188990489616 47.4740726032707 38.6005272730664 47.8164193292842  
69.7413896580273 44.5544727111028 42.0605906240248 44.8997235283254  
51.9545473262296 49.7259371799014 49.7363778831003 49.2064066614865  
WDR31 46.1513019317765 44.7200265825016 45.1899271235974 42.6913548400127  
44.3166120733789 46.3203995372658 54.0170817319522 46.9454141780379  
46.824299585607 44.8536205629296 48.1352470945488 46.4499258373233  
WDR33 100.344513700137 72.8472187581193 84.9280683258012 97.0442565553353  
136.172921695836 106.418690759491 85.1227830573138 111.240804216088  
133.594952879573 100.309661977543 97.0628249915636 125.061012833314  
WDR34 185.658246392943 156.822939275312 83.7159102306394 76.450993090133  
134.62138052303 83.955786676926 502.435496018532 199.23413224268  
200.615897175992 109.654559065946 135.92805172353 98.2074490157865  
WDR35 50.7390160399184 54.5826597684442 61.7502624458447 58.0218262176065  
70.9214288336034 64.1777305915695 58.2957814921605 65.8793101836179  
53.9287524861617 58.3813211109331 57.6610554457343 59.6427447868329  
WDR36 132.257197568848 126.911056987607 132.52749757795 156.382146982116  
148.144200968432 179.09303345382 122.187287716445 105.308648028552  
187.486245101512 167.799243454967 171.485221601137 170.184914156265  
WDR37 180.288784077653 120.299244758783 154.111066539468 193.951097560903  
170.999578495858 114.643475335002 114.755820699611 91.9919654450652  
136.891616331257 155.01005229951 136.250317107253 118.450965500771  
WDR38 44.3819828231602 44.2391871310123 45.5883690965192 45.6733937800088  
44.931941140132 44.7804080899431 45.1741601472623 43.844855336215  
42.934549734195 42.8304701368556 44.0627228016455 45.0583552831013  
WDR4 74.0420372528779 192.171116215791 197.720854621428 112.957927208627  
326.70962514228 106.486195938039 117.598001907902 119.670948133232  
147.579873410455 80.191847692094 102.610376474754 102.430234282331

WDR40A 215.033807819308 287.121456559795 131.717764850211  
188.713487905549 210.958578914607 158.532307373857 262.456109739351  
282.802560118785 266.581466060604 225.251124162268 173.603999265239  
226.235985918654  
WDR40B 47.1216490839161 43.826317180678 38.7745734037492  
43.0016969050339 42.8510579683751 46.7800033479223 42.5660695551615  
40.2819379659218 42.1594905198929 43.1839109702714 44.553780984244  
46.4952206446229  
WDR40C 42.5193208629123 41.2598458726002 40.301483914446  
41.5464765641928 39.859345745831 43.8582747295766 41.4742337714895  
42.157627240486 36.6312676076142 38.957687788868 42.2618615571566  
39.6352613956998  
WDR41 93.8361140725228 105.997702773537 141.293219914385 135.769551614412  
108.479856042609 116.51037006692 63.3924515518667 100.887736959095  
64.643220133046 104.763913120468 104.398842509776 126.336900591139  
WDR42B 38.2083710281545 40.148780650831 39.6451483836089  
37.5382094267692 35.6434124419782 38.7340969861754 36.4098694708483  
38.2782436497441 42.357910063876 36.2435874904689 35.6041926503637  
36.449101775775  
WDR42C 35.1307934330047 37.6383530120621 43.5710871617107  
41.0726336841311 40.4639532172338 39.9397419279057 37.7136011474903  
40.7311497914871 38.9834959368496 43.7303813515864 43.401782064778  
39.6352613956998  
WDR43 122.599723509633 105.446338599737 95.1666040574435 71.1583251698218  
170.87055409699 78.9521593412581 109.844156801015 154.309544187593  
85.9087280306456 47.4767851750188 64.3824529624475 69.8505620106065  
WDR44 64.0759817636265 48.7084357480922 53.2046867327331 61.3149617644002  
59.2643906275025 70.6467150815052 54.0170817319522 54.1731035633439  
66.1940959364976 66.9497120104244 65.6556779936059 71.8887764487177  
WDR45 77.554620469891 78.8595005348182 70.7003843117511 118.911578268073  
66.2443103843603 85.5027511448958 102.559678338485 89.0275988550016  
84.3526980051279 93.6260859565297 75.5799609581534 75.3969721155153  
WDR45L 397.745727767552 353.868749867979 231.637751095711  
192.536546957155 254.82779318297 239.590143292142 346.530266177867  
209.33818226065 540.721068846198 162.272853632419 177.460053912279  
204.554792089177  
WDR46 409.899024157206 277.796753761378 302.422475486532 274.689780722548  
355.7118155732 250.040637073537 380.098235864256 250.866560791828  
179.07886477603 262.024495926094 300.560071753181 211.164957509884  
WDR47 67.7831020218081 66.0282565447846 79.7170181855209 86.2488614616838  
61.8924196882984 69.9819944829311 63.4753448572245 51.4360013601805  
73.0308075762165 57.2813205536176 60.4122350478242 75.7666827480067  
WDR48 79.3539393480885 187.689343320587 207.943044411392 116.694275999729  
330.241189572237 242.339375770778 194.079940066252 77.3999378505514  
220.514070515085 188.789206373516 159.268245287939 190.977045076469  
WDR49 39.5676051939342 43.3458769998118 45.4865173433646 41.4273122914951  
41.1507980856436 45.2457367460834 47.8947595316832 45.5842286511645  
40.7460990419215 44.3187284857534 44.1148826235374 44.7401523707775  
WDR5 93.4042243540384 96.3120603627576 64.2084111281705 66.4510869175159  
88.2959958615748 72.5956443098684 119.660151314176 62.5036823572932  
79.9719218603993 87.9638809147835 78.055431384988 67.9850517608624  
WDR51A 168.91210897306 191.284436365696 184.833679989936  
106.20479137406 325.990132666873 84.5913809068614 384.992066112903

|        |                  |                  |                  |                  |
|--------|------------------|------------------|------------------|------------------|
|        | 350.106705208362 | 288.065258507995 | 80.3915591207869 | 73.155721596638  |
|        | 89.0727613846343 |                  |                  |                  |
| WDR51B | 51.5033727579864 | 55.6323803479191 | 56.939860285007  |                  |
|        | 52.8502823653368 | 47.5647821785529 | 52.4351670989268 | 74.5591290353333 |
|        | 44.6107027295193 | 68.8353800542132 | 51.0055825931636 | 60.8201366212589 |
|        | 55.9555622193202 |                  |                  |                  |
| WDR52  | 48.0201377454632 | 44.9370339275041 | 45.8445073504868 | 83.0959169307948 |
|        | 53.9612654850046 | 55.0009147092272 | 51.0724630072723 | 51.6660481331154 |
|        | 51.4111372893136 | 45.7328341667151 | 44.6834648302383 | 50.8736372975089 |
| WDR53  | 70.8288090024328 | 61.6878176260761 | 61.2153068100932 | 53.593974682612  |
|        | 87.7337304906377 | 64.5187138759372 | 55.0897019602305 | 67.6082563445866 |
|        | 67.8208976798364 | 44.6918600441328 | 56.6884575165011 | 64.650642183463  |
| WDR54  | 389.131545459708 | 255.241295723095 | 292.93036571522  | 270.600852806342 |
|        | 463.527266972118 | 186.724171695644 | 989.0602710707   | 955.088515235485 |
|        | 582.017297217368 | 340.962490240304 | 312.245547906683 | 321.61848221455  |
| WDR55  | 73.8374823243007 | 86.0630164348952 | 98.1433318215702 | 75.0377156190383 |
|        | 92.3034609409756 | 67.9306669919176 | 67.7965120293445 | 122.621100838222 |
|        | 92.681224908389  | 73.2445837559745 | 68.9745034946434 | 99.0545942554244 |
| WDR57  | 260.010554284184 | 339.313853828248 | 288.552986300755 | 251.184621899165 |
|        | 527.563018145855 | 270.487135967976 | 414.293172794592 | 302.730527540866 |
|        | 268.047342640491 | 144.515737827731 | 206.768099707991 | 243.952697457779 |
| WDR59  | 265.930422462959 | 388.920739791844 | 615.011590811277 | 262.865950409375 |
|        | 377.847116683974 | 254.472291205905 | 373.399443929227 | 370.495645380436 |
|        | 293.883582116334 | 437.015713629277 | 417.331253559307 | 345.615640348066 |
| WDR5B  | 64.4415447415281 | 46.6314009405034 | 51.7138050344355 | 48.665578118898  |
|        | 51.7983110178095 | 46.574682061365  | 69.1414574152997 | 42.7431359850339 |
|        | 55.6617952786921 | 51.8412522234186 | 56.7765567227989 | 54.0374522273907 |
| WDR6   | 858.228943026906 | 1382.25775340179 | 1201.00042684883 | 538.716947884528 |
|        | 1881.7281441986  | 813.242005949542 | 1517.66978539206 | 851.813216452015 |
|        | 965.530928317269 | 1771.43541011426 | 1582.45600339543 | 877.316304736545 |
| WDR60  | 155.270252661048 | 130.953274536639 | 136.392873701653 | 89.4504034432321 |
|        | 144.412165495719 | 175.985530451862 | 124.599352191013 | 108.700838142885 |
|        | 155.730834354163 | 164.917385239962 | 163.971002049561 | 157.133627517432 |
| WDR61  | 370.64147085217  | 410.623529765253 | 277.014526407597 | 368.078954546259 |
|        | 704.601607617837 | 602.047768767953 | 404.674869177442 | 397.199620114138 |
|        | 506.75912743556  | 240.975885654236 | 392.898761909406 | 442.99540222483  |
| WDR62  | 57.0006212637829 | 44.5884811528117 | 48.8941062980393 | 39.066284740632  |
|        | 59.8102324370568 | 39.8455060654531 | 63.3924515518667 | 54.3820590274321 |
|        | 70.5699797830702 | 40.8970401536578 | 32.6463318577756 | 42.6758568421347 |
| WDR63  | 42.0532901689036 | 40.9731067463382 | 38.9790184198145 | 41.3027031037343 |
|        | 42.9090346219023 | 45.8325181856483 | 36.9355798143571 | 37.9837233601316 |
|        | 41.7627910693483 | 38.0078357808393 | 39.7342718293432 | 36.6603338274678 |
| WDR64  | 39.4710743516517 | 42.9358255168086 | 41.6079958749402 | 41.4273122914951 |
|        | 39.0564222526273 | 41.0582900711341 | 42.0605906240248 | 42.5435283762933 |
|        | 40.4997186069494 | 39.6719190054379 | 37.2892641289258 | 44.5432192783161 |
| WDR65  | 32.3120809246762 | 37.3634897565502 | 37.9482157381008 | 37.0732977341185 |
|        | 43.6587492470348 | 41.8613406887824 | 40.4359177791566 | 35.5798430594271 |
|        | 42.7150227340364 | 37.3179578037963 | 34.3633615460307 | 38.2350720635382 |
| WDR66  | 38.7537364570873 | 41.159706131351  | 39.3709357615493 | 47.0874209746031 |
|        | 36.9060997041453 | 40.040778349137  | 43.5627649099623 | 40.831207953647  |
|        | 42.8036731479932 | 47.9056710878325 | 35.6041926503637 | 42.57175366709   |
| WDR67  | 74.6776631832355 | 78.0522475574761 | 61.6878176260761 | 76.450993090133  |
|        | 60.9710783023013 | 59.9876575158981 | 65.0031119608637 | 58.5406981871153 |
|        | 78.3542840447759 | 52.2256177934134 | 52.104880481326  | 68.3234331335073 |

|       |                  |                  |                  |                  |
|-------|------------------|------------------|------------------|------------------|
| WDR68 | 329.978705095448 | 355.00914527669  | 259.456935785521 | 320.13475752314  |
|       | 364.044597485771 | 225.329170139176 | 407.161973433666 | 338.000998124097 |
|       | 361.945511835039 | 314.36962447353  | 308.280127837858 | 259.698043923535 |
| WDR69 | 36.6480005877129 | 35.4484652445078 | 38.6727842796202 | 32.554751989205  |
|       | 36.3390947880186 | 43.3785777889265 | 38.0598374201407 | 36.1375121409002 |
|       | 37.0126425326534 | 38.957687788868  | 47.6125796208753 | 36.8690774823319 |
| WDR7  | 63.3717459766798 | 68.3234331335073 | 73.1654226019863 | 109.726577835621 |
|       | 54.5125550937898 | 84.0733026747075 | 60.7051911023888 | 55.1531662914834 |
|       | 86.033725825968  | 70.8546350449171 | 83.2925226467532 | 82.5506190124216 |
| WDR70 | 216.606583011866 | 242.899629257173 | 237.237762964658 | 173.925818790068 |
|       | 257.506228440451 | 322.678762360476 | 462.234151352018 | 674.270050283701 |
|       | 314.36962447353  | 264.88963894526  | 242.673166257518 | 227.317566600324 |
| WDR72 | 462.362735276132 | 816.746599467159 | 116.295564219236 | 35.6027791404152 |
|       | 232.628747594691 | 58.7404123614695 | 232.553783060082 | 257.80636663638  |
|       | 571.790034754076 | 82.966263655525  | 62.8408273986904 | 69.8505620106065 |
| WDR73 | 63.3717459766798 | 92.3659612653822 | 78.080034922779  | 63.1604223919703 |
|       | 97.3188285021124 | 74.7669841575348 | 93.2133061608764 | 93.3718038663074 |
|       | 58.5561424827901 | 79.6133633483649 | 99.9752275166514 | 79.5898953726467 |
| WDR74 | 153.153205095999 | 110.860844149372 | 105.572103854818 | 108.815245119101 |
|       | 207.245428311682 | 101.41797925803  | 185.312851727212 | 249.679512440891 |
|       | 133.344625514809 | 175.193752938517 | 181.586195566181 | 140.41738844565  |
| WDR75 | 484.968116511768 | 296.176349059192 | 323.576613035353 | 158.225884127529 |
|       | 604.357590751951 | 380.278389209918 | 298.482444614086 | 444.169882251299 |
|       | 359.940393399742 | 416.717470974721 | 340.553073657744 | 383.371300272181 |
| WDR76 | 42.7150227340364 | 44.5884811528117 | 40.1985790927248 | 37.5382094267692 |
|       | 43.7517118200398 | 39.3841861812262 | 54.6414321010929 | 41.8417024632349 |
|       | 48.3119523820103 | 36.4651112441576 | 36.9060997041453 | 36.5474283500601 |
| WDR77 | 78.3851687801705 | 117.239774193934 | 93.310557793228  | 59.0965219753805 |
|       | 151.848243044839 | 96.6294773538052 | 113.866742186841 | 103.856444152519 |
|       | 135.800775637089 | 176.75369241505  | 130.177232923004 | 152.47776741936  |
| WDR78 | 40.4310982248029 | 40.0145811166794 | 38.3166554965434 | 38.1421709520616 |
|       | 41.5317763076169 | 38.1814775034697 | 42.2129151148932 | 39.512606833112  |
|       | 37.4937394063612 | 39.3866822630357 | 38.8132170743603 | 39.1807622935084 |
| WDR79 | 61.6544855697851 | 60.1685144469519 | 53.8724557170772 | 40.3180310664156 |
|       | 77.2608629053098 | 62.6839349907803 | 78.080034922779  | 71.0593419018503 |
|       | 67.1278109419819 | 59.8130420783374 | 62.2965257278236 | 50.3118072462443 |
| WDR8  | 279.063292799015 | 289.843931942051 | 232.553783060082 | 165.311139930529 |
|       | 416.40156274382  | 222.570136481811 | 316.373650015333 | 328.080879084015 |
|       | 246.568253751149 | 199.54796711653  | 227.404530886674 | 206.072527867605 |
| WDR81 | 48.6621527194963 | 53.1278271804774 | 62.0008474085033 | 72.4834467838798 |
|       | 62.046151104685  | 57.3797835448761 | 50.3519150282938 | 42.357910063876  |
|       | 38.0213051227859 | 42.4594149893798 | 65.6824363141962 | 46.5650556481721 |
| WDR82 | 295.856741468603 | 590.139974503603 | 557.275332269647 | 419.741944629785 |
|       | 635.52621743309  | 543.807654287436 | 823.933615182634 | 271.436000380202 |
|       | 477.263677441074 | 475.159378115819 | 626.390544175817 | 386.98657211459  |
| WDR85 | 59.220967994972  | 63.4570909617664 | 54.2670850492947 | 51.949834638817  |
|       | 58.7460488758053 | 48.6621527194963 | 66.4258159334241 | 52.5098795466615 |
|       | 57.1863195337055 | 66.5422130374814 | 58.7389869173495 | 54.4313108506244 |
| WDR86 | 240.217589414972 | 51.7983110178095 | 53.6837370963602 | 71.0211264570699 |
|       | 56.4685270445642 | 76.331185787832  | 41.706879587091  | 55.6904617926772 |
|       | 39.4762546236449 | 49.5265949137207 | 49.8393069675192 | 55.6351010690528 |
| WDR87 | 44.6231541342    | 39.8455060654531 | 40.6737160001291 | 39.2406797798509 |
|       | 39.2114264935239 | 40.4753617660107 | 42.2577689927563 | 39.6995529770239 |
|       | 43.3744503319109 | 39.1621898366355 | 45.5707650534259 | 39.8497227447888 |

WDR88 33.2552842693684 37.1685072112618 40.4070046183108 30.802355637173  
33.6330903323612 31.7413650507468 26.6357008041456 31.4517139158876  
37.2810767789306 31.5892202809227 31.7413650507468 34.5633623842083  
WDR89 46.3390850717989 39.6479637904026 38.6427582272425 40.0195349109823  
37.8679241954337 44.5544727111028 42.6786833450085 42.4580504587581  
42.357910063876 39.7397636748413 42.1516028411593 42.9887069977696  
WDR90 57.4777075615651 83.1979076141836 82.4362183543935 40.646702696033  
83.0497574039035 50.2729836196996 58.5588286084726 40.2770232552555  
54.4912806027381 53.7196173866021 55.9604109457703 51.9447450229707  
WDR91 145.694779669933 116.967446594767 168.388385941598 101.144615206297  
91.9685593100867 101.020328028769 70.5534237141767 53.2046867327331  
98.6825522152097 97.4769942713663 92.9323002425821 76.3824005526731  
WDR92 127.232160404726 79.3971417347713 80.354283778818 68.1992221684165  
135.106756607914 80.8333046859586 104.599492214295 97.1271615802556  
93.8042295944812 73.5527788467294 75.0237373605584 70.0907269565408  
WDR93 41.3387790895716 41.8848959280916 38.1421709520616 38.5252456306656  
41.6806984441849 45.8325181856483 42.7431359850339 37.33030683349  
38.7298222155532 38.745552403895 38.5668610487033 43.2776458914333  
WDSOF1 52.8427643366617 46.4385386401326 43.7630587657205  
47.481302504066 54.3116862772198 43.6670755115848 44.9863726205428  
41.4508241771315 45.4799270968969 47.2299678280724 51.2318935933116  
49.1200355938198  
WDSUB1 117.282216847547 99.1860882192276 86.0550457387351  
124.611407530723 79.1822591641672 111.760213205992 94.4618437533343  
86.915098846441 73.4122412764173 133.720493104769 97.712117589297  
136.825026294861  
WDTC1 34.4896350146096 46.1569135229922 41.2365089689635 33.6816578730693  
33.8558232866797 32.2133093774284 38.1793598983615 35.1738399826814  
37.9273653326866 34.1648535095605 37.3687900733549 35.3525469364579  
WEE1 94.3674661847143 392.409679550956 248.414210905199 77.2218991550552  
133.050913526638 147.269661124015 177.088290547513 221.049503614433  
311.943214184523 195.403882457038 215.131274710043 287.423909789368  
WFDC1 86.9816932158186 168.640033281185 91.9375312869437 70.506090074243  
159.176229924883 295.127975044241 43.4544762830742 167.034910927177  
58.3564461855595 234.495626550751 192.666532389331 218.510816443243  
WFDC10A 43.3638918705225 42.7775752471711 47.2055133646385  
39.853175885492 44.8897737954573 42.6575535390785 46.9929836306816  
43.2551508830106 41.2870505273664 46.6598879466655 42.7275315121163  
40.0557788909923  
WFDC10B 41.0608773166058 37.10170285405 34.8956628705329  
39.066284740632 35.4484652445078 34.1336988442837 40.369768755239  
40.0965255448873 41.9083581529276 41.0057887014368 40.4504608195666  
41.1868052124344  
WFDC11 37.6397652536077 41.8848959280916 40.6737160001291  
38.9534635879195 34.0045980663271 35.9305494063137 41.5817737564592  
37.7612949798895 42.1594905198929 40.5090849993014 36.3390947880186  
46.3411353377615  
WFDC12 40.2087556903277 37.7384958256497 39.5893773029164  
37.5764485234171 42.6575535390785 40.3946758935842 38.1169703906207  
36.801808772895 42.8036731479932 39.6251842352088 37.2018803984555  
39.1878770155069  
WFDC13 36.1232327599945 44.1239711172417 32.6121532029976  
36.7892997857376 42.7107928951766 37.4782441311626 42.357910063876



|         |                  |                  |                  |                  |
|---------|------------------|------------------|------------------|------------------|
|         | 40.7311497914871 | 38.2215591930186 | 41.5435611403119 | 41.7272875295469 |
|         | 39.3575468494941 |                  |                  |                  |
| WFDC2   | 49.8278140263915 | 40.1073950092563 | 45.1569741609597 | 39.0266821712099 |
|         | 48.2081129576405 | 51.9421032049606 | 72.4094549259929 | 49.4328793554823 |
|         | 54.998510746958  | 50.7390160399184 | 50.3745056312199 | 51.7382401683029 |
| WFDC3   | 141.924244643825 | 44.4772114267866 | 40.1985790927248 | 46.2399969315262 |
|         | 43.1892285249551 | 64.9030399249327 | 46.794716003113  | 47.945438269111  |
|         | 42.357910063876  | 48.2596564318071 | 55.8907481937375 | 68.6788460999238 |
| WFDC5   | 38.1713217245067 | 53.8499082625091 | 64.7847448333122 | 37.2559756339764 |
|         | 38.3085139808968 | 41.408887993053  | 47.2927436772465 | 43.7396619462033 |
|         | 53.2046867327331 | 58.2818491355907 | 44.2527566343661 | 46.1592873342534 |
| WFDC6   | 36.7356360093603 | 44.2105195734073 | 41.6079958749402 | 35.49696651597   |
|         | 40.9950639693255 | 41.9543948167375 | 38.2933870238743 | 35.6825474397235 |
|         | 42.0621425894624 | 39.4710743516517 | 38.745552403895  | 37.7526485343328 |
| WFDC8   | 42.2455707947223 | 41.2262949117288 | 41.1742244762318 | 41.3567204694281 |
|         | 41.0885562160946 | 38.9378717994178 | 39.4012855594431 | 41.8417024632349 |
|         | 39.7537274655115 | 39.6719190054379 | 40.723990462047  | 43.7410507935043 |
| WFDC9   | 42.3433931248155 | 38.5252456306656 | 41.6079958749402 | 42.8235313007746 |
|         | 44.5668141895992 | 41.6590564937735 | 41.3594868055879 | 42.8482181313226 |
|         | 41.6616444147804 | 37.920964499903  | 42.8263096141654 | 40.8681871019812 |
| WFIKKN1 | 47.7267190613906 | 40.9731067463382 | 47.0055981216687 |                  |
|         | 41.6564075217517 | 35.3327761997046 | 45.3882138838137 | 40.1235656101329 |
|         | 31.7063377004409 | 42.7150227340364 | 42.3606390470387 | 43.844855336215  |
|         | 41.863927676552  |                  |                  |                  |
| WFIKKN2 | 38.6454098044474 | 38.9338521051669 | 38.1421709520616 |                  |
|         | 34.1051821768421 | 38.1644569189523 | 38.2293008890613 | 40.0052661202207 |
|         | 36.5393857306744 | 40.8970401536578 | 40.3235655331796 | 38.956280281655  |
|         | 35.8429598823818 |                  |                  |                  |
| WFS1    | 371.513106715598 | 386.170232791927 | 552.162906190653 | 254.519518210024 |
|         | 359.381284202484 | 974.296760034984 | 305.048508698231 | 795.381998233245 |
|         | 355.67721196018  | 969.805093523651 | 1205.82775512007 | 550.100918659768 |
| WHDC1   | 46.8712941728147 | 54.0461131287999 | 40.1985790927248 | 52.403135056701  |
|         | 50.0173461659833 | 45.9980734733005 | 55.5578334877425 | 55.9303347977781 |
|         | 48.4497719907777 | 56.1912096308988 | 54.2999306485758 | 62.9904770954043 |
| WHDC1L1 | 41.8982199176791 | 42.2114134935898 | 40.5420275086253 |                  |
|         | 40.1804147506786 | 43.3825725820858 | 45.253561583081  | 45.2775291511947 |
|         | 40.4639532172338 | 41.6616444147804 | 41.3641352453779 | 41.5608567983735 |
|         | 40.1130972216246 |                  |                  |                  |
| WHDC1L2 | 43.4173515108896 | 41.2276963324981 | 41.5562673496867 |                  |
|         | 42.7431359850339 | 43.4812166409346 | 39.9763752848782 | 37.2892641289258 |
|         | 43.4997018727878 | 44.1519466943185 | 41.2665909203775 | 41.3277288245157 |
|         | 45.8051846088552 |                  |                  |                  |
| WHSC1   | 41.3848620620968 | 41.2262949117288 | 42.1204847421254 | 41.4606714407332 |
|         | 42.9655396732962 | 41.2098211956301 | 42.0084182258024 | 40.6171774724171 |
|         | 39.4762546236449 | 39.8524855780143 | 40.4967168818294 | 41.8029983527795 |
| WHSC1L1 | 49.4742925789913 | 47.8400694856726 | 48.8584917918986 |                  |
|         | 46.8954576545929 | 51.1890773634123 | 50.2950101030503 | 53.593974682612  |
|         | 49.6203214143464 | 53.5750566160354 | 49.1165251579197 | 51.6772086573595 |
|         | 50.9339938653926 |                  |                  |                  |
| WHSC2   | 44.8914371498528 | 72.0112676564347 | 58.4137028673494 | 44.6905691366696 |
|         | 55.8173045043348 | 65.9014252111112 | 68.673864919178  | 53.6210959113222 |
|         | 71.9771425105735 | 78.0658258913875 | 64.4570366205389 | 66.0786923699684 |

|        |                  |                  |                  |                  |
|--------|------------------|------------------|------------------|------------------|
| WIBG   | 226.785831708938 | 213.768352764473 | 188.120766710975 | 157.677866955988 |
|        | 135.19133529995  | 116.066916521887 | 162.735117558467 | 336.490083577377 |
|        | 280.563427715895 | 173.391542207362 | 155.378768637562 | 155.050936910986 |
| WIF1   | 35.8208542506595 | 36.4002279956519 | 37.0642268327439 | 43.8002456102021 |
|        | 38.1644569189523 | 40.244271403831  | 35.1307934330047 | 37.6557714476853 |
|        | 39.0775870687758 | 45.9004543328976 | 42.7275315121163 | 44.7401523707775 |
| WIPF1  | 49.2091117967683 | 49.1800325307387 | 44.7255207589606 | 69.6511571901941 |
|        | 49.32293280121   | 52.2089306840125 | 49.3067361345568 | 46.4329203134841 |
|        | 44.3440839686558 | 48.3693338695392 | 44.6834648302383 | 44.0246886382298 |
| WIPF2  | 58.5759178381027 | 54.6793272901524 | 49.3000844711116 | 61.5515639412892 |
|        | 53.0419743379342 | 50.8533737532786 | 61.6544855697851 | 55.5578334877425 |
|        | 57.0301170427216 | 57.8585041080995 | 52.022479439889  | 49.2064066614865 |
| WIPF3  | 43.6706764143908 | 38.2263227947189 | 40.4070046183108 | 38.0958223740111 |
|        | 40.9950639693255 | 47.3791873993182 | 44.8643898647322 | 54.720204938924  |
|        | 41.9635525160083 | 38.3092241935352 | 42.0750889188255 | 39.7411455670172 |
| WIPI1  | 182.976132230487 | 164.44912535816  | 109.832638804839 | 252.280105035425 |
|        | 105.945216149549 | 107.148000219752 | 126.930102684077 | 133.69701250532  |
|        | 132.098298410135 | 103.385447205588 | 93.9956276432715 | 117.355761277966 |
| WIPI2  | 94.7604013126314 | 74.621822948059  | 65.1911280716126 | 78.8741966117641 |
|        | 105.446338599737 | 87.9638809147835 | 69.4677195088043 | 74.9146278608114 |
|        | 84.4111182389028 | 95.042308285667  | 69.6449298794042 | 69.9767092409915 |
| WISP1  | 67.0338519200714 | 47.4617077792004 | 41.6550823405646 | 90.5216273844682 |
|        | 61.4366256816323 | 41.7627910693483 | 39.700936357233  | 42.157627240486  |
|        | 34.7722083264266 | 38.957687788868  | 43.363245077835  | 43.8575940017119 |
| WISP2  | 89.0495215957248 | 47.6914221838216 | 41.1367478979484 | 41.4273122914951 |
|        | 39.4693871570028 | 994.015710537746 | 48.4859552186772 | 44.1311654985682 |
|        | 57.9713749600418 | 175.578169606663 | 119.808125185521 | 251.905799624693 |
| WISP3  | 53.8241354251942 | 80.173718023183  | 39.1553169409075 | 38.8025302527057 |
|        | 66.8733921725051 | 43.2219358930127 | 44.9027423017108 | 38.4141941589742 |
|        | 78.1040551228844 | 42.6211340086915 | 40.5084378738092 | 40.1179210534118 |
| WIT-1  | 46.5549623118323 | 36.6002100641539 | 37.7384958256497 | 41.4273122914951 |
|        | 42.1650127805175 | 45.8325181856483 | 37.830876898596  | 37.33030683349   |
|        | 42.1594905198929 | 38.528621456378  | 43.6629145624937 | 44.9070250604284 |
| WNK1   | 122.674230293606 | 98.7446830481164 | 117.474987556447 | 144.18700333025  |
|        | 100.151116279734 | 144.954155897343 | 104.00520458442  | 129.810477623628 |
|        | 148.514056973195 | 157.9970294734   | 160.459991480576 | 174.985336606027 |
| WNK2   | 49.8472708021525 | 43.4396866157171 | 43.8495248991589 | 40.0698728584484 |
|        | 49.452985143568  | 45.7300501624017 | 45.8980298854198 | 43.844855336215  |
|        | 51.8824384192988 | 55.7930787690756 | 50.2203578628217 | 46.1592873342534 |
| WNK3   | 41.3387790895716 | 41.0678614026819 | 42.9104454767916 | 41.7082242184693 |
|        | 43.5544347011646 | 43.1062482379279 | 42.6786833450085 | 40.5654775358427 |
|        | 39.2566275301834 | 39.9948390976317 | 43.5367669381526 | 42.171601283248  |
| WNK4   | 42.7150227340364 | 42.1607322031054 | 38.6727842796202 | 44.0451487108213 |
|        | 38.745552403895  | 39.132725377815  | 42.629412460409  | 47.2864663693787 |
|        | 56.5094373275922 | 44.2580151149956 | 44.2925355984056 | 36.064718696392  |
| WNT1   | 45.6517320730042 | 42.1607322031054 | 39.2707964550441 | 46.4555908533915 |
|        | 40.4639532172338 | 39.7394181011603 | 38.941855825269  | 41.1575777497576 |
|        | 38.9834959368496 | 37.920964499903  | 38.3684202018524 | 34.6720534245631 |
| WNT10A | 39.0620487644635 | 48.9899488302637 | 118.619819027443 |                  |
|        | 40.646702696033  | 47.4548471240051 | 42.0574848021044 | 45.7452456977857 |
|        | 60.7942162859036 | 60.7480970026669 | 74.6847594297153 | 50.0303076717704 |
|        | 50.0571060701893 |                  |                  |                  |
| WNT10B | 41.8409927585705 | 42.4493032770053 | 37.2838080935695 |                  |
|        | 39.066284740632  | 38.9496515344837 | 45.0882356578404 | 39.1539892144371 |

|       |                  |                  |                  |                  |
|-------|------------------|------------------|------------------|------------------|
|       | 39.1652965788406 | 35.3227485563945 | 42.5664883002833 | 42.357910063876  |
|       | 46.5650556481721 |                  |                  |                  |
| WNT11 | 40.5654775358427 | 41.0678614026819 | 44.9758339877851 | 47.481302504066  |
|       | 39.4693871570028 | 53.565717255469  | 43.4544762830742 | 46.1673159982664 |
|       | 45.0997987980157 | 44.6918600441328 | 52.022479439889  | 45.2783024981315 |
| WNT16 | 46.6348258763289 | 53.6057809398787 | 49.513009632558  | 50.9493788151501 |
|       | 42.3685136297603 | 51.2318935933116 | 48.0283573444179 | 50.857522488428  |
|       | 44.8003345643334 | 54.1012074865821 | 53.4542270684482 | 51.6660481331154 |
| WNT2  | 162.37682406314  | 61.5429260998857 | 44.8872784170036 | 71.7167037224069 |
|       | 54.6820069269589 | 57.0775902639215 | 36.9355798143571 | 74.0831311663524 |
|       | 45.0997987980157 | 46.0119912782855 | 48.042366934301  | 53.9431600945419 |
| WNT2B | 41.7835997867848 | 47.9665737016961 | 46.02045129728   | 46.3203995372658 |
|       | 48.7288537840562 | 54.0104259381604 | 45.7452456977857 | 44.1642484298135 |
|       | 44.3754281580557 | 57.51482768194   | 55.9401754632145 | 59.0457625163577 |
| WNT3  | 48.8941062980393 | 78.1204313889396 | 47.5673419710251 | 44.9370339275041 |
|       | 70.6903168772326 | 44.5544727111028 | 58.5087296620514 | 56.4779645313958 |
|       | 52.8502823653368 | 49.1928206164702 | 45.1432412071268 | 41.863927676552  |
| WNT3A | 41.3387790895716 | 38.0226905622357 | 38.8775560911841 | 42.4580504587581 |
|       | 47.8075998240396 | 38.4330755397458 | 40.5585676679482 | 45.1714698794331 |
|       | 62.1796792097014 | 39.9948390976317 | 43.1931731665131 | 42.6758568421347 |
| WNT4  | 46.5549623118323 | 44.5884811528117 | 40.301483914446  | 43.9282059368202 |
|       | 70.18594926052   | 43.4681646416585 | 47.1345949868029 | 60.7942162859036 |
|       | 49.7336769474446 | 59.0630473216622 | 50.6473771879221 | 45.4799270968969 |
| WNT5A | 101.448989278761 | 130.908206625954 | 303.390680076861 | 165.411942074375 |
|       | 207.632489510045 | 51.0506441018166 | 43.0930293831497 | 158.613823276652 |
|       | 195.146655512672 | 228.660261263355 | 246.820301517765 | 479.318513108472 |
| WNT5B | 48.7213586071409 | 51.2405397507224 | 42.5406888281114 | 59.198088069573  |
|       | 45.5809132232681 | 109.677588309718 | 41.8799523546812 | 55.421880601441  |
|       | 82.5708447805445 | 63.9129423266349 | 62.8753829543444 | 54.7953298048942 |
| WNT6  | 41.0608773166058 | 41.554942319225  | 40.1985790927248 | 38.5252456306656 |
|       | 42.4864576619427 | 43.1826328292558 | 40.1235656101329 | 41.0381860307445 |
|       | 41.3803269429468 | 40.8970401536578 | 37.3687900733549 | 34.0382693188794 |
| WNT7A | 37.9387791625384 | 38.6414316877471 | 48.4890615340603 | 48.856176220627  |
|       | 33.5412189543102 | 43.5752393599169 | 38.941855825269  | 38.956280281655  |
|       | 46.6944238390932 | 45.1569741609597 | 45.6348103033479 | 45.2783024981315 |
| WNT7B | 45.9090659324223 | 67.3269632644926 | 64.9072331703985 | 46.2462906014337 |
|       | 55.3718910891548 | 45.6706505553383 | 52.7002314230604 | 50.563951934942  |
|       | 49.1399035787209 | 47.1785588364488 | 51.0013344286851 | 48.0080291106034 |
| WNT8A | 40.8091178323174 | 40.7602938767524 | 42.4580504587581 | 41.8291484190524 |
|       | 42.3685136297603 | 39.9397419279057 | 41.8315602975157 | 36.3405039629059 |
|       | 39.9791973792384 | 41.7405682794166 | 35.7953070087288 | 38.4829727716328 |
| WNT8B | 38.7537364570873 | 40.8880530359822 | 41.2365089689635 | 34.7266486944713 |
|       | 43.2484996523549 | 44.7804080899431 | 43.6753843488695 | 44.293922970134  |
|       | 37.8319142847141 | 42.9866214102525 | 51.0492389286271 | 43.3744503319109 |
| WNT9A | 43.2724556187214 | 44.4411734611229 | 46.4569566520107 | 51.7739270955254 |
|       | 39.9697332660833 | 40.650742261428  | 48.4859552186772 | 35.5798430594271 |
|       | 44.4395580493118 | 41.6373771565199 | 44.3763859390287 | 45.4799270968969 |
| WNT9B | 35.9305494063137 | 31.8637059340657 | 34.1806289878747 | 40.1804147506786 |
|       | 36.3390947880186 | 33.4492509999281 | 34.4570158133896 | 31.3302670771182 |
|       | 31.5151915411476 | 39.4710743516517 | 35.3362091871364 | 35.0222940937513 |
| WRB   | 78.1313732870053 | 81.7866333107878 | 119.72858253254  | 74.4365426051588 |
|       | 134.307645598718 | 137.916048669047 | 101.250422688816 | 79.4300569391437 |
|       | 103.808640431626 | 65.5996869277644 | 69.8314582428552 | 103.64431747876  |

|        |                  |                  |                  |                  |
|--------|------------------|------------------|------------------|------------------|
| WRN    | 113.444217634165 | 92.6608453151206 | 126.319731178054 | 124.350816245276 |
|        | 90.9521112485099 | 96.8783070574131 | 123.061728345479 | 86.2118355769367 |
|        | 111.202737864873 | 106.590506599473 | 111.558107942386 | 112.436153468759 |
| WRNIP1 | 515.409979010663 | 377.573838771285 | 318.768560912915 |                  |
|        | 236.10027586633  | 675.079525434102 | 295.999383698826 | 287.121456559795 |
|        | 289.533968432846 | 614.088027946471 | 281.141138830497 | 256.55408314817  |
|        | 283.747865829282 |                  |                  |                  |
| WSB1   | 146.983805232769 | 179.433109488671 | 146.196470375622 | 179.662015390213 |
|        | 101.516595046503 | 147.010700944686 | 194.644164648125 | 253.462941029119 |
|        | 122.904323796484 | 152.612579631539 | 133.314819245044 | 163.360824752796 |
| WSB2   | 75.6471706262645 | 78.9203273221608 | 73.967017874248  | 72.4834467838798 |
|        | 63.25187762908   | 56.3525213736952 | 55.5578334877425 | 71.408876667815  |
|        | 65.4784797364469 | 79.7389069715403 | 78.0020909283414 | 81.2068428211497 |
| WSCD1  | 40.9558083259517 | 37.7384958256497 | 37.5597671487621 | 39.066284740632  |
|        | 36.4434672195785 | 37.9951997351435 | 39.5496902678788 | 35.0510338774593 |
|        | 40.137818555383  | 37.5343260962758 | 38.956280281655  | 42.1537476443423 |
| WSCD2  | 42.3433931248155 | 42.0709558258414 | 44.9758339877851 | 39.1706564265495 |
|        | 35.6434124419782 | 43.0860383229288 | 38.5066108855005 | 32.229154316188  |
|        | 50.4974478884077 | 43.844855336215  | 49.2206713037152 | 52.0359304386476 |
| WT1    | 38.4330755397458 | 38.5252456306656 | 41.9287023391451 | 46.0228732507872 |
|        | 46.1804647841331 | 45.7300501624017 | 41.9741368971524 | 41.7419877611072 |
|        | 43.7078399718247 | 44.5303781239209 | 39.5399188536544 | 43.3744503319109 |
| WTAP   | 114.230358276599 | 87.1735705257803 | 77.9820921829024 | 153.279284223069 |
|        | 101.789162379972 | 80.287662312208  | 81.5582217750731 | 83.5767232665142 |
|        | 75.164719839017  | 80.1077267656485 | 77.4094261081238 | 106.309161354804 |
| WTIP   | 65.2735059202804 | 62.6236991757723 | 55.7246872330059 | 45.5869891570251 |
|        | 74.4623288220969 | 83.1614238528477 | 61.0468099710416 | 53.7378346199838 |
|        | 70.178974380507  | 57.9141744971757 | 63.3717459766798 | 62.8485724004124 |
| WWC1   | 279.448591201269 | 85.1950626054282 | 98.3798838151482 | 42.4580504587581 |
|        | 141.740347756446 | 48.4758590019384 | 160.360785581153 | 391.08302432808  |
|        | 149.475318376458 | 115.414481087246 | 163.16724817696  | 90.689813277023  |
| WWC2   | 42.6036491382658 | 43.3458769998118 | 41.8751578329365 | 45.1944222548351 |
|        | 49.9493230064613 | 47.5733603903505 | 42.357910063876  | 42.157627240486  |
|        | 45.7452456977857 | 41.3321861371202 | 47.6125796208753 | 51.5741598315033 |
| WWC3   | 165.974848305379 | 71.9162507601624 | 135.782043043499 | 146.268519891864 |
|        | 67.9032387662129 | 156.754606475323 | 93.748984888348  | 142.846665249354 |
|        | 92.3388129097482 | 95.1000239210194 | 143.590160385066 | 112.585860083115 |
| WWOX   | 45.5955029316007 | 43.6562479579142 | 44.9210663878929 | 40.6003408330684 |
|        | 41.2445895434274 | 42.3035427430823 | 45.8980298854198 | 39.8067641711565 |
|        | 46.2768056702424 | 42.5294887665766 | 44.1694355165457 | 43.0930293831497 |
| WWP1   | 373.46798029115  | 265.667557678228 | 184.484466722861 | 198.497745548245 |
|        | 207.464632062656 | 306.487935692954 | 228.439524702578 | 168.11088055793  |
|        | 248.258290059808 | 277.325795311848 | 244.498602338731 | 274.731304343034 |
| WWP2   | 61.141483572676  | 62.0908175930716 | 82.4005336009159 | 79.172237641942  |
|        | 67.1278109419819 | 60.0502421545569 | 68.7342341724306 | 77.7907484334847 |
|        | 74.3981029634178 | 76.8998454389745 | 82.8770530537113 | 75.2735539010032 |
| WWTR1  | 42.9104454767916 | 40.5400384479766 | 41.8751578329365 | 50.5310598656998 |
|        | 41.5668884168669 | 87.539553421006  | 57.4047331041592 | 42.5435283762933 |
|        | 40.2274522635576 | 43.844855336215  | 41.7272875295469 | 42.6758568421347 |
| XAB2   | 365.723799716137 | 274.259417498569 | 404.674869177442 | 242.58992925232  |
|        | 323.576613035353 | 273.275823600027 | 359.83890067786  | 452.139416552986 |
|        | 360.900649927623 | 483.416873464931 | 509.233939630204 | 315.880072026714 |

|        |                  |                  |                  |                  |
|--------|------------------|------------------|------------------|------------------|
| XAF1   | 118.05982513603  | 211.279069257808 | 351.439404852971 | 150.336199715245 |
|        | 73.6323065529916 | 96.2490896573253 | 97.4515987591398 | 109.481322353402 |
|        | 89.847560289665  | 110.467254789988 | 115.962193866339 | 82.2266112813039 |
| XAGE-4 | 35.8208542506595 | 42.2577689927563 | 41.8389336728199 |                  |
|        | 39.7840818430159 | 40.3452320167286 | 40.7063426028871 | 44.2753808209563 |
|        | 34.9580369221164 | 44.0256815382334 | 38.7008388965825 | 41.862634402486  |
|        | 37.8490162439785 |                  |                  |                  |
| XAGE1  | 40.2087556903277 | 40.6723334103791 | 39.4250105372135 | 40.241149247208  |
|        | 41.1868052124344 | 39.7697110924474 | 40.7376840028647 | 37.0011886211643 |
|        | 40.9416717019827 | 41.5435611403119 | 40.4504608195666 | 41.9083581529276 |
| XAGE1B | 44.0328992213727 | 46.5401727105521 | 39.4710743516517 |                  |
|        | 47.9915414951747 | 43.7517118200398 | 42.2830035667142 | 40.6750540874299 |
|        | 40.8833572570383 | 41.4397539024976 | 40.5090849993014 | 43.0971787292711 |
|        | 38.7012264805355 |                  |                  |                  |
| XAGE1D | 42.2455707947223 | 37.2810767789306 | 41.1367478979484 |                  |
|        | 39.9697332660833 | 37.7576900881741 | 34.0777108441756 | 42.2577689927563 |
|        | 41.9315419791594 | 42.5406888281114 | 44.8997235283254 | 34.5633623842083 |
|        | 37.0953622406687 |                  |                  |                  |
| XAGE1E | 39.1590964332473 | 41.3610369241157 | 43.3085358214154 |                  |
|        | 39.6292788039793 | 44.7829632472754 | 43.7630587657205 | 41.4742337714895 |
|        | 36.3405039629059 | 38.8271346375425 | 45.7911932481722 | 37.7384958256497 |
|        | 45.2783024981315 |                  |                  |                  |
| XAGE2  | 41.7397731376692 | 42.2900457798748 | 39.9519547348106 | 42.6913548400127 |
|        | 38.8834538955    | 36.7356360093603 | 40.5585676679482 | 39.1652965788406 |
|        | 38.0213051227859 | 37.7315666632629 | 37.4642807402741 | 41.8200132437731 |
| XAGE3  | 39.5676051939342 | 40.3104838541906 | 41.6079958749402 | 37.1317006162938 |
|        | 36.3390947880186 | 39.066284740632  | 40.369768755239  | 40.0965255448873 |
|        | 37.4937394063612 | 39.3113207075992 | 38.2293008890613 | 37.1747156131306 |
| XAGE5  | 39.4710743516517 | 35.8227939208521 | 43.0016969050339 | 43.4410741327254 |
|        | 45.1137938810047 | 35.4142595025086 | 35.9058393060637 | 37.0390589468421 |
|        | 37.2810767789306 | 32.7876527533679 | 37.4642807402741 | 39.4490233720848 |
| XBP1   | 1145.59111340228 | 2745.8277126123  | 1789.07186722972 | 3869.93390477952 |
|        | 837.959914510114 | 1509.04753111016 | 1673.60994518271 | 810.021622878441 |
|        | 1428.47642890543 | 241.08817915181  | 398.641868389511 | 639.778130093087 |
| XCL1   | 41.187562301961  | 40.6723334103791 | 39.3709357615493 | 41.1493778437527 |
|        | 36.2048942610546 | 38.4330755397458 | 38.7745734037492 | 40.0965255448873 |
|        | 37.0526522140242 | 39.0648733099061 | 36.4689948499058 | 39.7844133452634 |
| XCL2   | 43.2724556187214 | 40.8880530359822 | 41.437237454134  | 41.0726336841311 |
|        | 40.7779767565889 | 33.3470732872681 | 37.3799542961839 | 40.3357777530419 |
|        | 40.2274522635576 | 42.3606390470387 | 41.1638563416981 | 39.5418280570561 |
| XCR1   | 43.0394685862018 | 41.2598458726002 | 45.7407938943718 | 42.2674195935107 |
|        | 41.8407088454059 | 38.8603695827799 | 46.8613212048981 | 45.1137938810047 |
|        | 46.0556875486307 | 44.7463386786906 | 41.7677037290981 | 40.9243125941198 |
| XDH    | 112.211717641877 | 55.1766423847208 | 69.7855392178808 | 40.4359177791566 |
|        | 55.3100442506299 | 37.1317006162938 | 42.4939802311136 | 44.4031868028216 |
|        | 44.7058233759912 | 41.4397539024976 | 41.1638563416981 | 51.0013344286851 |
| XG     | 36.5393857306744 | 35.2143190355414 | 45.063792968927  | 39.066284740632  |
|        | 44.5668141895992 | 42.8598805316863 | 40.2154497375715 | 37.5511560880902 |
|        | 47.1744296124496 | 39.6719190054379 | 39.8184668132023 | 35.4484652445078 |
| XGPY2  | 39.0237504776589 | 38.1811246394237 | 37.9003288112261 | 39.5050383901884 |
|        | 41.6340461942423 | 42.1046072075724 | 43.3832826368789 | 41.4508241771315 |
|        | 39.2497056720346 | 39.6251842352088 | 41.3145333832821 | 40.7704587752083 |

|         |                  |                  |                  |                  |
|---------|------------------|------------------|------------------|------------------|
| XIAP    | 45.0985088502363 | 50.8114699212931 | 45.2313723727673 | 35.1451084093692 |
|         | 49.8304479381623 | 58.2531879680192 | 46.0228732507872 | 41.0381860307445 |
|         | 51.7549258776884 | 41.3321861371202 | 45.7328341667151 | 52.2832912331043 |
| XIRP1   | 41.1523487516364 | 34.5023764006976 | 32.2133093774284 | 37.651298468202  |
|         | 42.269054475455  | 38.7340969861754 | 32.8745892439217 | 34.8949555140527 |
|         | 35.3227485563945 | 33.5412189543102 | 42.6366765186182 | 46.0633179231318 |
| XIRP2   | 38.957687788868  | 36.4002279956519 | 40.4070046183108 | 40.9607305725196 |
|         | 42.0709558258414 | 39.132725377815  | 38.941855825269  | 38.745552403895  |
|         | 41.9635525160083 | 41.0057887014368 | 39.5399188536544 | 37.2810767789306 |
| XIST    | 46.0920218698606 | 45.7979032939211 | 81.2136969156029 | 48.4916117779992 |
|         | 43.9450023643394 | 38.5252456306656 | 44.3440839686558 | 38.5457716679071 |
|         | 38.4344387289956 | 44.2580151149956 | 43.1931731665131 | 44.3521099857368 |
| XK      | 44.7044140979108 | 64.1607001437806 | 47.2055133646385 | 44.550322123994  |
|         | 49.32293280121   | 66.4015820814547 | 110.589130460258 | 58.4200819624972 |
|         | 79.2824265044758 | 54.7827221235949 | 61.6702707724448 | 51.138877923954  |
| XKR3    | 36.8072833828297 | 39.5050383901884 | 37.0642268327439 | 43.5627649099623 |
|         | 38.9496515344837 | 40.3357777530419 | 37.3799542961839 | 38.3684202018524 |
|         | 31.5151915411476 | 39.6719190054379 | 35.4386677371439 | 38.0452862258803 |
| XKR4    | 39.266565827316  | 41.4508241771315 | 48.8100349749783 | 39.9697332660833 |
|         | 32.325260431418  | 53.1052228246467 | 36.9355798143571 | 38.1835938174625 |
|         | 42.7150227340364 | 40.3235655331796 | 35.2339574411711 | 38.8495095797881 |
| XKR5    | 46.0920218698606 | 41.6466169548846 | 39.5450079747895 | 39.2780515621926 |
|         | 38.0598374201407 | 39.8455060654531 | 42.0605906240248 | 44.4031868028216 |
|         | 40.3316153483289 | 52.4351670989268 | 39.0550139257658 | 38.4330755397458 |
| XKR6    | 43.8550481835503 | 46.8954576545929 | 43.826317180678  | 44.550322123994  |
|         | 49.6679337957544 | 46.6872654833579 | 39.4600924554505 | 41.0920120134247 |
|         | 53.7792717770978 | 44.571915452417  | 52.104880481326  | 47.3675706016665 |
| XKR7    | 42.3433931248155 | 42.1607322031054 | 38.6005272730664 | 39.066284740632  |
|         | 43.4544762830742 | 40.9506062495231 | 38.6243997507646 | 36.3405039629059 |
|         | 39.3750969348308 | 36.1550293353654 | 40.4504608195666 | 40.5703581862752 |
| XKR8    | 78.2644076847509 | 66.2154717217675 | 63.3544794716167 | 101.930058725119 |
|         | 80.4895102121889 | 67.4256666294142 | 66.8475050031365 | 65.2464683900404 |
|         | 69.1564181547342 | 82.475816811779  | 65.9056396615997 | 57.1441484662045 |
| XKR9    | 41.4508241771315 | 40.4359177791566 | 40.5734458834617 | 44.0451487108213 |
|         | 36.4434672195785 | 38.7340969861754 | 34.5633623842083 | 39.9576138799997 |
|         | 35.7973685350741 | 40.2112371512838 | 40.1742127891824 | 43.1805016690297 |
| XKRX    | 48.6621527194963 | 43.683792219729  | 42.4580504587581 | 39.7411455670172 |
|         | 42.0709558258414 | 38.5252456306656 | 61.8571521441451 | 48.9826868640753 |
|         | 43.1805016690297 | 38.4187686307607 | 42.0750889188255 | 40.3691324547049 |
| XKRY    | 37.2474303302343 | 34.3715326040967 | 34.6977013306396 | 40.4359177791566 |
|         | 37.1565984182084 | 36.8059561571675 | 41.253645578517  | 35.4526946152955 |
|         | 34.8552366193358 | 35.195364621675  | 36.2435874904689 | 40.1700117452801 |
| XLKD1   | 37.0320432433314 | 36.4002279956519 | 38.8775560911841 | 40.646702696033  |
|         | 43.5544347011646 | 292.600202149564 | 41.5817737564592 | 41.0381860307445 |
|         | 42.8036731479932 | 75.3333024462557 | 63.7963501146829 | 146.61436309209  |
| XPA     | 41.6354649482853 | 48.5905518770847 | 38.9790184198145 | 34.9221408381038 |
|         | 39.7568367479301 | 43.1826328292558 | 31.6981395162348 | 50.3082459161777 |
|         | 46.7760357462635 | 45.9004543328976 | 39.4410515050885 | 43.4709415392696 |
| XPC     | 245.489660195494 | 462.234151352018 | 318.369837408344 | 270.202959012185 |
|         | 260.824949424185 | 242.135519563833 | 341.666968456707 | 359.465715235071 |
|         | 184.048982286364 | 366.716775127375 | 377.847116683974 | 322.169157552725 |
| XPNPEP1 | 313.660064080622 | 390.834121304799 | 351.637117984528 |                  |
|         | 357.800871454252 | 335.167786298149 | 305.786520619504 | 424.182335137838 |

345.443895623911 282.196234758364 362.927960895643 314.36962447353  
 440.93348620369  
 XPNPEP2 51.1055541075029 40.8880530359822 48.1331309338997  
 51.949834638817 46.9906120932727 84.1922656126304 53.1884505015411  
 46.3685439301234 42.8036731479932 82.7229468743536 62.6048727240291  
 89.737418965763  
 XPNPEP3 3726.73487426505 2257.78227736778 2921.68921750799  
 2348.48320928245 1744.56688411113 1789.07186722972 2911.10227993347  
 3905.8371644287 2054.64068255575 3838.19449971537 4058.32430616734  
 3043.12489526581  
 XPO1 549.67905283016 353.598144765197 433.637087338002 368.318359434313  
 550.751923603828 500.794458547464 507.307494640785 502.67939538729  
 696.113365766871 432.355300448283 483.20917825594 557.717744882602  
 XPO4 101.987604729928 141.611097024526 143.773311381452 130.673639258681  
 133.244526666651 130.953274536639 108.709630036731 119.905655993777  
 96.3741876853801 132.242070552057 146.691463448295 131.238796973323  
 XPO5 116.852483297949 83.8850034281243 84.9970776435852 78.3509756704423  
 153.405734390061 86.1633564934019 122.514153407264 67.5206810636627  
 110.828108546789 99.1952492360239 74.7669841575348 87.799979434508  
 XPO6 212.688298502868 213.933347509147 230.401917528056 550.100918659768  
 458.861461526841 173.511692216696 251.027270265657 400.506633704584  
 247.723546145775 166.168385855406 171.176393131741 136.825026294861  
 XPO7 257.584248252408 127.676574457297 216.782658096982 128.937837181433  
 124.051109959228 130.249044369793 145.027715477051 122.877322487518  
 139.191263237202 128.157032116902 140.35042464015 139.731620245421  
 XPOT 75.1701698483856 81.909815795953 80.943990104641 64.6945454069792  
 106.276392548097 75.1674447943072 74.2690269784394 48.87875862356  
 97.1271615802556 46.0119912782855 48.5292718280498 59.2035499250243  
 XPR1 188.552900887757 242.751164798133 309.102633242573 146.719419166639  
 234.308728996238 113.287380238064 290.031202636467 542.901822331329  
 220.167309646966 192.112101000423 221.325534445978 289.332274319357  
 XRCC1 98.8719561245756 111.409762290528 102.288104112092 87.9098670472958  
 123.674164545425 108.022329297132 127.232160404726 182.905368976291  
 125.946162432491 115.643361390258 103.349712762251 91.0346886951891  
 XRCC2 580.109585240053 322.229113548162 291.486402879057 430.868309653765  
 241.202687910704 238.510952165358 465.887689708274 929.862002014478  
 260.964562714558 830.295872113419 1081.97502255142 664.453262499828  
 XRCC3 84.1254258487497 72.2016884438365 80.0183739952818 57.4595416719581  
 93.0626550693989 51.3886035574416 125.184689092836 118.341308125578  
 109.943883439481 64.3383155834968 66.2027948645675 67.8335962843732  
 XRCC4 36.6480005877129 39.7835513496873 41.3366779545815 40.8681871019812  
 41.7929491793697 38.2293008890613 43.0930293831497 40.6171774724171  
 37.7384958256497 39.0648733099061 42.0750889188255 39.6352613956998  
 XRCC5 142.309369995384 219.64979849407 167.430013807712 102.483081702338  
 255.762638489554 225.53019299714 157.095926797414 110.287699369482  
 256.995917821765 149.27230040094 159.022432105333 219.103786570566  
 XRCC6 729.342532316666 788.950470077369 645.114504971255 547.072513229674  
 637.035929429013 850.205634919459 977.776395810338 830.295872113419  
 1026.51177853708 793.570993808328 698.105755081829 588.736435715365  
 XRCC6BP1 102.044838876428 103.808640431626 136.236041346288  
 90.2790229242453 101.987604729928 100.305262467668 90.7037473522607  
 98.9657264176664 143.399636653204 55.3153799233744 71.2370255410834  
 107.276913085701

|         |                  |                  |                  |                  |
|---------|------------------|------------------|------------------|------------------|
| XRN1    | 97.7140868175135 | 92.0002934041687 | 112.924613715969 | 143.251956814524 |
|         | 82.1344514651393 | 105.197692490363 | 91.6978282652998 | 109.192770642308 |
|         | 88.4594321382477 | 181.772001042799 | 141.567299023381 | 116.839274984089 |
| XRN2    | 96.3232257371077 | 160.303575545559 | 122.136867360309 | 183.820203505757 |
|         | 191.811190401876 | 161.326580647514 | 165.107387190373 | 90.2227706363325 |
|         | 105.945216149549 | 76.1382217104599 | 90.4909052059366 | 129.580254143964 |
| XRRA1   | 42.8036731479932 | 48.7084357480922 | 42.8270038153139 | 58.3475983630509 |
|         | 47.6884372645373 | 43.4681646416585 | 50.5252048155459 | 50.3082459161777 |
|         | 55.9423752286714 | 42.5664883002833 | 45.0589947942306 | 40.5703581862752 |
| XTP3TPA | 538.716947884528 | 531.36214636517  | 431.168903637888 |                  |
|         | 243.403622361932 | 1323.73429724066 | 352.768184657577 | 514.853892585612 |
|         | 457.860665614779 | 327.283431584541 | 195.108184885541 | 175.960838580876 |
|         | 279.448591201269 |                  |                  |                  |
| XYLB    | 54.8439819445945 | 58.1027665533767 | 66.288032400574  | 41.1886975241176 |
|         | 202.01900875263  | 65.3801154142721 | 68.7753456118815 | 96.332996264667  |
|         | 83.5069968129733 | 60.7495043977707 | 63.0763092522598 | 54.5921287593554 |
| XYLT1   | 43.7585538437696 | 47.2055133646385 | 42.7303139017786 | 49.5424425850549 |
|         | 62.9553576299033 | 53.6858208094027 | 47.2927436772465 | 38.5457716679071 |
|         | 49.6078549993388 | 52.0999467564713 | 50.3221380889396 | 41.863927676552  |
| XYLT2   | 299.188277423715 | 241.202687910704 | 293.086409068972 | 170.184914156265 |
|         | 299.240215762404 | 178.688550924272 | 220.85458646522  | 301.867441371793 |
|         | 297.739286969257 | 362.927960895643 | 342.146013966482 | 324.126628444078 |
| YAF2    | 61.6858759579955 | 55.3178018558518 | 57.50915811428   | 54.9765783642973 |
|         | 52.9900255491262 | 62.1334409150387 | 54.1707158323527 | 51.4360013601805 |
|         | 61.073266843778  | 70.5437727804882 | 69.9652162720742 | 69.9767092409915 |
| YAP1    | 195.340273658052 | 158.557256842416 | 255.915599666591 | 123.281175151414 |
|         | 246.274692971423 | 357.574415292533 | 224.665128374218 | 266.439343650315 |
|         | 254.112875195524 | 457.502917254598 | 427.818758455214 | 451.290681710534 |
| YARS    | 486.757854744053 | 491.468862309918 | 342.300139006451 | 542.467997217663 |
|         | 653.089523541803 | 432.001201940414 | 722.514380928291 | 665.122091380755 |
|         | 775.515071756239 | 382.190644764853 | 468.153823329361 | 402.571146447946 |
| YARS2   | 231.733564500645 | 232.47874874281  | 205.314410185216 | 140.662969373546 |
|         | 269.618616631857 | 205.789533350801 | 204.039190380778 | 240.476103976894 |
|         | 295.848968688724 | 167.319747725488 | 220.217797955745 | 243.06561740595  |
| YBX1    | 598.970109654466 | 850.205634919459 | 718.832367050609 | 973.363245512859 |
|         | 1164.71243740122 | 1191.93354266135 | 898.114119553014 | 803.548811322583 |
|         | 996.520340280883 | 536.013150313097 | 551.490493022416 | 763.947361966861 |
| YBX2    | 66.9417866448504 | 39.0894172982439 | 46.3411353377615 | 47.6687908290818 |
|         | 44.0451487108213 | 50.6360662655392 | 46.8613212048981 | 56.8094693588238 |
|         | 44.7058233759912 | 43.2988017098387 | 44.2925355984056 | 44.2527566343661 |
| YDD19   | 36.2496364442264 | 32.7800533388945 | 45.5883690965192 | 40.8681871019812 |
|         | 47.8075998240396 | 43.1826328292558 | 43.6753843488695 | 43.9366081640576 |
|         | 45.1899271235974 | 43.401782064778  | 38.079222289614  | 41.7575097298927 |
| YDJC    | 93.7352369697358 | 127.82585786161  | 84.5998418020787 | 64.6945454069792 |
|         | 103.199200862158 | 52.3187919317561 | 122.988056802699 | 71.2867274976738 |
|         | 123.25443049561  | 69.8941497035747 | 81.6472320169489 | 67.8335962843732 |
| YEATS2  | 232.911951245618 | 173.013258797349 | 153.028210322286 |                  |
|         | 122.024487499513 | 181.772001042799 | 141.808284719109 | 225.088911324737 |
|         | 163.097224522154 | 199.858233616116 | 163.585662735512 | 180.994353525666 |
|         | 187.888403806895 |                  |                  |                  |
| YEATS4  | 90.5503099572843 | 138.314834472957 | 109.144663527001 |                  |
|         | 97.6774247176874 | 121.84142967836  | 104.492750153479 | 196.561401686392 |
|         | 76.2258667419953 | 185.360921731157 | 72.3297091475814 | 79.3191219048672 |
|         | 111.98520046281  |                  |                  |                  |



|        |                  |                  |                  |                  |
|--------|------------------|------------------|------------------|------------------|
| YES1   | 156.844010597219 | 167.678403380953 | 159.268245287939 | 83.877343750194  |
|        | 156.433762355183 | 104.305801811472 | 179.694413858411 | 189.788255380723 |
|        | 248.924819383887 | 126.319731178054 | 112.644426507762 | 148.178364767218 |
| YIF1A  | 203.913062066149 | 189.344003908074 | 143.251956814524 | 190.099949303905 |
|        | 301.904682664871 | 176.871009816977 | 212.353676518748 | 190.099949303905 |
|        | 193.235216590157 | 157.250548147161 | 185.874151272261 | 169.920726825854 |
| YIF1B  | 343.418685340038 | 92.8280881907307 | 98.2381567001556 | 152.679927202674 |
|        | 138.032032026715 | 79.8878785326568 | 229.130963999337 | 117.869393694564 |
|        | 178.661935292895 | 78.806097512943  | 79.0039595317374 | 69.7644070698124 |
| YIPF1  | 281.840536529928 | 256.302432791187 | 348.757322819568 | 293.355303451014 |
|        | 235.593721159442 | 168.288592321667 | 172.748740911831 | 220.79051545138  |
|        | 269.963186760811 | 230.649032296928 | 216.63059645927  | 252.313870846326 |
| YIPF2  | 69.1641374421455 | 55.8678615468603 | 74.9113162056974 | 83.014860007187  |
|        | 92.5135737873857 | 63.2343637481705 | 66.6894494536346 | 77.118454956956  |
|        | 62.4776210012906 | 62.9205616877344 | 61.940656536312  | 67.6983931011126 |
| YIPF3  | 548.387793019855 | 540.304257899761 | 545.514314651238 | 401.56876565547  |
|        | 402.221227674218 | 291.713831398096 | 391.397318564183 | 332.137622104526 |
|        | 489.983164420779 | 587.385368995676 | 500.168833003599 | 438.50123471613  |
| YIPF4  | 112.787082951803 | 100.114114765033 | 90.9810377546009 | 121.831344781285 |
|        | 80.428712610358  | 97.6326743942878 | 128.485596739193 | 134.994839576312 |
|        | 115.221134337342 | 67.9259304928255 | 73.4535007027931 | 90.689813277023  |
| YIPF5  | 52.5367085454068 | 41.690833180291  | 54.0170817319522 | 63.9570596163747 |
|        | 43.7517118200398 | 47.5733603903505 | 55.2088411137193 | 49.8344973836834 |
|        | 45.2392954271967 | 63.6894484284172 | 56.3106156221316 | 53.8909465631671 |
| YIPF6  | 227.642500471069 | 409.899024157206 | 281.141138830497 | 304.977139992391 |
|        | 220.597255695837 | 360.248832535446 | 300.057362423939 | 480.660242705293 |
|        | 308.280127837858 | 391.83348187444  | 410.058119360034 | 410.716248834784 |
| YIPF7  | 41.8409927585705 | 46.1569135229922 | 41.437237454134  | 41.3027031037343 |
|        | 41.0885562160946 | 43.8582747295766 | 41.0381860307445 | 38.956280281655  |
|        | 37.2810767789306 | 41.0057887014368 | 44.2925355984056 | 44.8372404608604 |
| YJEFN3 | 37.8386378737561 | 53.2046867327331 | 44.696023817801  |                  |
|        | 38.2041059863839 | 42.269054475455  | 43.7630587657205 | 58.7585623394335 |
|        | 39.6474008369935 | 46.1101825640108 | 46.6598879466655 | 49.532546810992  |
|        | 42.6758568421347 |                  |                  |                  |
| YKT6   | 36.0144420013819 | 37.1685072112618 | 36.9795961564828 | 37.1894304543751 |
|        | 42.1650127805175 | 38.2293008890613 | 43.1931731665131 | 41.0381860307445 |
|        | 40.6957787921451 | 35.3849221682845 | 39.4410515050885 | 41.1554481567603 |
| YME1L1 | 192.98559983091  | 226.672191323896 | 227.686495419561 |                  |
|        | 229.379918828848 | 281.906398109158 | 286.243476131448 | 205.279698624867 |
|        | 173.992867985744 | 229.659465419141 | 74.2379710965903 | 104.873452487222 |
|        | 202.627009037401 |                  |                  |                  |
| YOD1   | 83.1614238528477 | 103.808640431626 | 102.471939526704 | 84.4422623834916 |
|        | 134.099684731177 | 66.295597720304  | 95.2218627805387 | 107.637618676176 |
|        | 87.275548276476  | 79.9126192278104 | 100.271925566074 | 82.5708447805445 |
| YPEL1  | 94.1967497986791 | 68.1040271620925 | 60.1874689914535 | 61.8997157694697 |
|        | 51.2525124735102 | 66.0069448981947 | 132.689951767479 | 107.844799332742 |
|        | 46.8873421271259 | 66.5422130374814 | 60.0105984819248 | 55.1804535845496 |
| YPEL2  | 157.843337785472 | 97.712117589297  | 92.804679821289  | 117.539037885384 |
|        | 85.7842344710572 | 117.520762118299 | 61.5000955267432 | 60.9009676344258 |
|        | 83.5646728968172 | 87.3815040456105 | 82.9256976863272 | 84.4349803529132 |
| YPEL3  | 298.721050521396 | 379.098697147575 | 513.266895252699 | 357.800871454252 |
|        | 236.595286890677 | 267.427827956058 | 274.081959734368 | 402.412173952792 |
|        | 151.175959542368 | 441.710000911092 | 423.989018031638 | 274.02972772427  |

|        |                  |                  |                  |                  |
|--------|------------------|------------------|------------------|------------------|
| YPEL4  | 45.1912496459517 | 42.3550738181144 | 41.6079958749402 | 43.1847628331565 |
|        | 40.9950639693255 | 56.3525213736952 | 42.2577689927563 | 40.047314525032  |
|        | 39.4762546236449 | 52.6879797806876 | 44.8872784170036 | 50.379587451669  |
| YPEL5  | 510.232992765054 | 652.480459437977 | 436.216696884703 | 799.803676957263 |
|        | 206.08791147394  | 736.846933148564 | 392.409679550956 | 548.217757366495 |
|        | 331.935072199058 | 757.257495810249 | 631.632335640448 | 993.626865290891 |
| YRDC   | 647.297964303385 | 687.011162822211 | 472.522115719366 | 621.980260052085 |
|        | 472.522115719366 | 375.529704925121 | 635.906934423716 | 991.630429625437 |
|        | 404.86512250958  | 879.708199333257 | 874.419252731128 | 677.481235695517 |
| YSK4   | 41.5787026298957 | 38.7344853699576 | 39.8669424994203 | 41.1886975241176 |
|        | 40.8270141118472 | 40.5912213523345 | 41.6550823405646 | 40.1474543172332 |
|        | 41.7627910693483 | 40.2601451506332 | 41.2250007054033 | 39.7763627041882 |
| YTHDC1 | 419.360641528378 | 317.004252313348 | 345.713643158898 |                  |
|        | 359.296873000994 | 205.449627031002 | 333.731080636948 | 325.676668250281 |
|        | 362.853023741815 | 302.667538432677 | 501.148339791372 | 486.757854744053 |
|        | 416.717470974721 |                  |                  |                  |
| YTHDC2 | 52.5792653122861 | 82.5344501505114 | 79.3066495980045 |                  |
|        | 61.7502624458447 | 68.4323624797175 | 50.9724155054821 | 50.2016912396771 |
|        | 52.7787010032051 | 55.5751438859404 | 58.8022152133979 | 75.8976034525022 |
|        | 61.4366256816323 |                  |                  |                  |
| YTHDF1 | 572.667024472672 | 385.512974999198 | 398.641868389511 |                  |
|        | 254.322611819303 | 438.50123471613  | 309.39599482851  | 405.148979342648 |
|        | 319.796914465104 | 508.474794786176 | 368.793978305607 | 302.20349084931  |
|        | 295.848968688724 |                  |                  |                  |
| YTHDF2 | 283.747865829282 | 263.706801812277 | 235.195902632101 |                  |
|        | 211.926421068313 | 307.133157118667 | 191.955732544426 | 274.994470779348 |
|        | 408.080620074472 | 312.795596385258 | 187.580695643466 | 224.749607192071 |
|        | 213.309547409053 |                  |                  |                  |
| YTHDF3 | 117.678385591938 | 99.1860882192276 | 88.2201332015312 |                  |
|        | 129.190555260332 | 83.0497574039035 | 90.7101037998119 | 80.2289541115146 |
|        | 74.6572522248684 | 117.282216847547 | 89.6670947876322 | 97.4062608315831 |
|        | 105.91905761474  |                  |                  |                  |
| YWHAB  | 782.28158356937  | 1525.47741161586 | 1516.33074288338 | 999.862452730252 |
|        | 1433.1813604069  | 915.102542160713 | 1683.24873205783 | 1310.03307063841 |
|        | 1354.50256889331 | 797.019657306322 | 912.757335169259 | 1282.9181829891  |
| YWHAE  | 104.103899614521 | 94.4501786945034 | 102.672950481425 | 75.6767883574112 |
|        | 84.2158827857221 | 76.5124583559262 | 119.700522283289 | 109.062415049404 |
|        | 75.2923395421694 | 80.9907498621309 | 93.3511668018003 | 107.122319086614 |
| YWHAG  | 249.704644191338 | 173.357715186701 | 142.192315159235 | 182.091945578277 |
|        | 217.533011278692 | 163.476051754305 | 172.206923437536 | 312.045709918301 |
|        | 248.527031538874 | 213.933347509147 | 168.897476166126 | 233.501069644324 |
| YWHAH  | 2745.8277126123  | 1453.77801653969 | 1939.66920192372 | 1981.03929621057 |
|        | 1465.98242110921 | 2678.43227619157 | 2865.25344854768 | 1707.92349760322 |
|        | 1182.10714525377 | 2039.89728774097 | 1564.55598228713 | 2113.73880184695 |
| YWHAQ  | 4015.88651424568 | 1864.63057767867 | 1693.5377672895  | 1080.43016747082 |
|        | 3190.0108307463  | 1969.8871504719  | 4368.11345948444 | 5156.59948231705 |
|        | 2191.09005731751 | 1459.69929955338 | 1186.06822787922 | 1928.53890809223 |
| YWHAZ  | 2598.78910128081 | 2771.14077845128 | 1855.0119962662  | 1575.71609894038 |
|        | 2678.43227619157 | 1526.94101719128 | 3786.90274075023 | 1405.20888023653 |
|        | 6356.05807792831 | 1382.25775340179 | 1250.15619347362 | 1455.64106630257 |
| YY1    | 104.914715637173 | 112.787082951803 | 155.564141715819 | 99.5125674355716 |
|        | 129.613152757362 | 119.474339360208 | 116.374125502825 | 126.711833914667 |
|        | 159.76714232068  | 84.3672289945664 | 108.213380368446 | 131.380698046552 |

|        |                  |                  |                  |                  |
|--------|------------------|------------------|------------------|------------------|
| YY1AP1 | 201.657389063895 | 106.226670314211 | 153.12544312212  |                  |
|        | 146.117756310709 | 144.139555313429 | 144.813029178278 | 120.02765867291  |
|        | 136.461760992832 | 128.616776019243 | 192.41551362197  | 186.67069792963  |
|        | 137.955007835039 |                  |                  |                  |
| YY2    | 38.385865183581  | 46.7591817286632 | 45.8844325913247 | 39.853175885492  |
|        | 48.1473938886239 | 41.4508241771315 | 47.5963750520409 | 40.6171774724171 |
|        | 44.619512785899  | 46.1390887492649 | 46.4205654140754 | 43.4709415392696 |
| ZACN   | 46.0920218698606 | 37.6383530120621 | 44.7829632472754 | 35.49696651597   |
|        | 44.6834648302383 | 38.9378717994178 | 44.8643898647322 | 38.5457716679071 |
|        | 38.7298222155532 | 35.2880714952489 | 39.6403089864678 | 39.9519547348106 |
| ZADH2  | 63.2753814090696 | 97.7965639721152 | 104.135574209392 | 76.2591822114739 |
|        | 64.0752803796842 | 69.2685201884906 | 60.3928833351886 | 59.9968592852122 |
|        | 71.6573554353691 | 77.775644509079  | 107.087870999702 | 102.899135663993 |
| ZAK    | 127.78061946174  | 103.64431747876  | 78.8357122967692 | 134.19834305339  |
|        | 110.869341159607 | 1408.59798540643 | 95.2915739972533 | 114.985875488866 |
|        | 85.8154958329408 | 263.937966521917 | 390.978292094212 | 450.972039573066 |
| ZAN    | 39.8316227503824 | 40.9731067463382 | 39.8299340037009 | 41.0273093212371 |
|        | 36.8428706077385 | 41.7196307387855 | 40.0668875818227 | 39.3709357615493 |
|        | 41.3413300001245 | 39.1621898366355 | 41.0554874392252 | 40.8084239472012 |
| ZAP70  | 46.8954576545929 | 48.9737731558494 | 49.5923712603197 | 59.7298493146287 |
|        | 38.4540849632254 | 47.0027453663546 | 38.7803273497182 | 44.5544727111028 |
|        | 45.9227107476843 | 50.7855742231932 | 51.955049625266  | 52.0790463576436 |
| ZAR1   | 40.4639532172338 | 35.0222940937513 | 39.1799070031819 | 40.646702696033  |
|        | 36.8059561571675 | 36.6996187567892 | 45.223075311113  | 40.5158867964016 |
|        | 41.4636047919453 | 43.6033221838149 | 43.401782064778  | 43.5738557773903 |
| ZBBX   | 43.0930293831497 | 48.8584917918986 | 39.1799070031819 | 41.0726336841311 |
|        | 48.3814421939888 | 39.8455060654531 | 49.6872467499977 | 46.9986083378817 |
|        | 52.8502823653368 | 47.4767851750188 | 47.6125796208753 | 47.1060577218993 |
| ZBED1  | 755.106456358949 | 634.514100741768 | 262.624624672404 | 393.001025840896 |
|        | 198.922575188741 | 366.716775127375 | 379.473739290565 | 1136.88710104691 |
|        | 308.728126648231 | 371.709014310561 | 373.172504097546 | 254.066741436612 |
| ZBED2  | 46.6348258763289 | 47.2770121962655 | 40.7620472083159 | 84.8948024208923 |
|        | 38.8456942580061 | 46.574682061365  | 41.706879587091  | 41.6466169548846 |
|        | 43.2761454096265 | 41.0057887014368 | 43.0971787292711 | 38.9496515344837 |
| ZBED3  | 38.2083710281545 | 38.4330755397458 | 35.0970060242246 | 34.7266486944713 |
|        | 36.3390947880186 | 36.4986986135769 | 36.634024014558  | 36.43924066428   |
|        | 36.0741672064298 | 39.7835513496873 | 41.0050831223107 | 37.6557714476853 |
| ZBED4  | 115.277469628296 | 151.686513723244 | 103.316970096472 | 94.3229189690855 |
|        | 210.73006676203  | 67.9306669919176 | 105.549249728506 | 101.888001006345 |
|        | 119.333788465158 | 75.5861488664745 | 58.7389869173495 | 66.6841624416436 |
| ZBED5  | 119.905655993777 | 184.001671627062 | 245.660544821992 | 117.127994102455 |
|        | 169.920726825854 | 178.012676342712 | 108.806649898122 | 142.933216800073 |
|        | 191.771063132796 | 180.100430567626 | 184.65212689433  | 250.41086379231  |
| ZBP1   | 93.5982028088194 | 128.503671563486 | 126.171040948196 | 257.993462737264 |
|        | 70.5676924620725 | 87.539553421006  | 67.5206810636627 | 68.1311562787361 |
|        | 113.839604953506 | 66.3956936248447 | 79.8701900696361 | 77.9085946827079 |
| ZBTB1  | 42.3433931248155 | 37.920964499903  | 42.4580504587581 | 39.853175885492  |
|        | 42.4864576619427 | 40.6507422261428 | 50.8388984085636 | 40.3357777530419 |
|        | 42.9020321355927 | 45.2556760873335 | 45.2265319826548 | 41.7575097298927 |
| ZBTB10 | 47.0940613507321 | 47.2055133646385 | 46.0727230219512 |                  |
|        | 45.1944222548351 | 39.4693871570028 | 44.1737502492846 | 49.2546642180676 |
|        | 44.797320243931  | 39.5806465938526 | 43.844855336215  | 42.2618615571566 |
|        | 41.4508241771315 |                  |                  |                  |

ZBTB11 41.0608773166058 42.5269793679335 41.6079958749402  
42.6913548400127 44.147557390293 37.9003288112261 46.0228732507872  
38.956280281655 42.5406888281114 49.8393069675192 46.7386599624801  
44.5432192783161

ZBTB12 39.9697332660833 42.2577689927563 42.5406888281114  
35.7674462337723 48.0234896130991 36.1190722948669 39.2533668167483  
40.6171774724171 49.7336769474446 42.1622837416589 40.1742127891824  
44.1452943804044

ZBTB16 43.9309845324767 41.8503210829559 72.3757385026596  
115.735359157053 61.9944005465335 380.639020028302 44.9272279146193  
49.0231541118532 40.6533975461148 127.345094323724 246.433145017965  
120.253165357188

ZBTB17 201.486224052899 176.492987902471 202.128650032341  
213.590067519021 169.804455288603 133.163926420863 223.219262492785  
201.427008153788 189.055029582117 156.401873737061 183.028254350275  
130.62791061956

ZBTB2 41.3387790895716 46.7591817286632 41.1367478979484 47.2009420656854  
45.3675390992851 43.7630587657205 47.5963750520409 54.8412943008635  
49.641159251878 43.7303813515864 43.6629145624937 48.1627097465883

ZBTB20 108.022329297132 130.953274536639 119.72858253254  
241.952522667413 75.3580625318157 523.679443405512 267.261896105785  
146.287473652123 104.103899614521 270.303708972854 460.865101118125  
188.582370265555

ZBTB24 139.590367312743 112.100074154279 102.607924735378  
108.779357041421 59.5844022026141 72.4651758215622 90.4957279507369  
391.08302432808 92.0711167984454 117.033529761587 107.906865732219  
94.1128427766432

ZBTB25 50.617420938219 46.9919960628953 60.6567691532561  
75.3761360028971 55.8173045043348 54.5222652584532 53.4921736109774  
51.2189089780361 58.8201021345225 62.3997407955361 60.1466326805616  
59.5370927657967

ZBTB26 43.3638918705225 46.8236022402545 46.2625470410195  
36.5393857306744 43.3332476888305 41.4508241771315 46.5650556481721  
42.7431359850339 52.2631308081333 50.8826620053386 39.3667161654772  
39.1553169409075

ZBTB3 53.3967242431461 43.9421822132391 40.4882741869718 47.3574589211166  
38.745552403895 48.4758590019384 55.2088411137193 47.3791873993182  
50.8485682149772 48.8623729374733 58.5588286084726 45.9693232070002

ZBTB32 44.7915315085948 55.1766423847208 54.3554233228353  
63.9570596163747 46.6397391251762 49.5424425850549 42.8684958525042  
50.1833483241864 43.9450023643394 47.7180816682562 41.7272875295469  
43.3744503319109

ZBTB33 368.390023942835 394.764369100963 275.846698617064  
312.40869171788 618.293140877956 179.886168478179 463.684654468418  
488.089090043145 526.750242877914 386.00975855841 320.038347979923  
329.978705095448

ZBTB34 79.8844295847317 72.6162848018047 60.7530213660442  
81.0486107101125 63.686652234709 65.0774755750423 81.5582217750731  
58.1521928484154 62.0967404944031 74.8170892324966 70.2215218476683  
68.4278345554565

ZBTB37 35.1307934330047 35.1224289925572 39.2707964550441  
38.2041059863839 41.467005949568 36.9060997041453 41.9393838138203  
40.6171774724171 35.4332080966594 37.7315666632629 35.9563099719284  
43.5738557773903

ZBTB38 42.9104454767916 44.6918600441328 44.4311655729487  
42.0102671859606 46.9906120932727 53.7442594289333 36.3194282084339  
40.931294690669 41.1742244762318 36.2435874904689 38.8507804383261  
49.3984571719129  
ZBTB39 56.6086202928268 51.524711857679 45.989212296035  
43.8002456102021 53.1884505015411 44.2607789091176 55.4004611309636  
56.4779645313958 58.4200819624972 44.1379638573455 55.1099824417989  
53.4735821194294  
ZBTB4 355.821515437298 239.316215255944 273.460165751162 233.07404514708  
205.510539955583 551.1195044975 286.456276735451 296.39460008432  
216.63059645927 660.295993198711 569.244038644604 552.860979481958  
ZBTB40 67.4846787600629 90.9570747667407 84.8948024208923  
129.434864701718 90.1830062843449 75.1674447943072 88.9430141071732  
87.799979434508 57.3385421837183 87.3815040456105 86.0100701849272  
73.7335870746827  
ZBTB41 52.4179224871914 47.2770121962655 62.7605715573218  
43.8002456102021 46.9906120932727 47.3791873993182 49.6872467499977  
44.8997235283254 57.4777075615651 41.1222709786153 51.1483696410762  
53.9431600945419  
ZBTB43 67.7831020218081 88.9321928608078 76.889690218685  
159.618353114269 77.9085946827079 90.7101037998119 118.736188485344  
117.369735504926 69.4009439491061 121.36340610316 124.041740442038  
103.75895351937  
ZBTB44 50.0466349801009 53.1278271804774 50.1860191642359  
40.7481155008596 57.0504111569238 46.574682061365 52.4111687156893  
70.7238101239421 64.7116910405493 68.4137459386155 55.6151308605445  
58.9069025298754  
ZBTB45 67.6011992144113 75.2101993995344 66.4079972657486  
48.4916117779992 98.5447123398675 71.7585486695516 79.7564155881026  
48.87875862356 88.0055507173538 69.7729022157455 77.7714622826402  
62.8485724004124  
ZBTB46 96.8783070574131 81.6529991377083 94.0749342825094  
111.703187941409 77.8355333140359 61.4944752562671 50.8388984085636  
108.838406710326 42.5406888281114 57.0581769379589 78.1856721173896  
58.9836017745712  
ZBTB47 64.1882546112044 61.9459245072385 57.6371756925687  
52.3004056941891 66.4047895961325 124.965915196815 51.9421032049606  
52.8622615027833 40.4997186069494 75.5861488664745 81.1350396749303  
71.0340758556049  
ZBTB48 135.19133529995 165.72797054597 178.400810392873  
150.801729138762 206.514263103112 158.334581991361 183.431582521592  
196.561401686392 151.175959542368 322.509777895373 322.440680131096  
232.911951245618  
ZBTB5 98.1495112518979 95.7639712596394 77.0301627655229 75.0377156190383  
121.142787642824 82.1144251872199 114.947362505193 62.8885806455128  
102.457537266105 107.420552630045 124.512081978396 84.5354986509039  
ZBTB6 43.4626049853157 40.0527893189096 33.8558232866797 35.2143190355414  
37.956732373465 40.244271403831 42.8684958525042 67.6767845246581  
36.9060997041453 43.401782064778 41.6336636285875 40.3691324547049  
ZBTB7A 34.5886782974123 32.2892762042267 42.4580504587581  
38.9534635879195 31.6519589095843 34.0045980663271 31.3222361955842  
39.4710743516517 41.074824727477 41.8613406887824 40.0766543123257  
38.0452862258803

ZBTB7B 48.1125722136997 54.9392038576957 53.1491634301682  
50.5310598656998 47.2074332636566 53.3185097662527 65.3694267397114  
52.0503062610092 49.7336769474446 48.0211752672327 46.0905079010237  
45.4799270968969  
ZBTB8 47.0940613507321 54.4190527512508 42.3536549114165 43.5627649099623  
64.6374507338031 47.7556758818053 67.6767845246581 65.3019328668633  
53.3932110698117 53.1993028936883 55.5567699051046 54.5921287593554  
ZBTB8OS 49.1147639552724 49.1800325307387 52.2695562895186  
48.1662933382789 52.2089306840125 49.8135461150818 45.2852528185486  
55.8678615468603 51.6731332961917 45.7911932481722 46.9919960628953  
50.379587451669  
ZBTB9 153.940127525369 93.8009890556664 120.221914344372 73.5834042105313  
146.405413944753 69.2685201884906 96.593956699892 90.1430468048409  
113.839604953506 131.083141370546 141.370796803908 99.1769280484821  
ZC3H10 52.2236479204029 52.0268699306396 54.5191471810265  
67.7121534934164 48.5000946421718 69.1523164481201 64.0985088513857  
55.3122077514658 69.779139490544 71.2409890549638 78.8357122967692  
68.6047087267554  
ZC3H11A 38.8561375693335 36.2103905554984 46.1653991089885  
46.0228732507872 42.1650127805175 45.1873487463472 42.9803717121865  
38.5457716679071 38.2215591930186 36.8059561571675 40.4504608195666  
42.1537476443423  
ZC3H12A 179.605537867711 334.349204174886 610.853753376105  
532.35007819883 228.933483421328 167.943170737481 602.047768767953  
708.839262759372 95.4942268742467 126.071077511531 189.865569826568  
122.576931376426  
ZC3H12B 51.2851682978581 39.1982470626863 42.7303139017786  
47.2009420656854 43.7517118200398 84.3755392205436 64.232967574797  
42.6450179841129 68.9038222450855 109.922909644299 87.7844808613265  
82.0124493733776  
ZC3H14 52.2631308081333 47.1954702042912 53.3747342978479  
48.2549905619119 54.0478584942486 65.4068498877665 50.1092226717582  
43.3972849968032 50.4397478643191 49.0322894371656 55.0009147092272  
57.0875538213735  
ZC3H15 132.541333041312 168.426372075344 115.894467332637  
132.369828264246 193.380035526465 183.002191434723 88.0664425843955  
143.653706909456 167.537023543498 91.8251275769679 87.3342335690393  
173.856274004533  
ZC3H18 62.4317959077388 70.5171002055327 87.9152471471338  
56.0794100106654 67.4534389579576 63.6894484284172 73.8313212063649  
55.8087097725119 76.1869593072029 50.1649089793069 63.0763092522598  
58.9836017745712  
ZC3H3 415.05124917015 347.196922795214 275.846698617064 298.771150048863  
305.554059609771 188.767243497644 288.065258507995 198.754967214875  
341.397811775105 224.635749257133 225.589127792587 185.843333258735  
ZC3H4 309.593721653575 320.232392398509 285.187681119318 243.489225650886  
315.382114449988 265.026710493466 281.141138830497 278.629995328901  
322.371597171026 242.751164798133 252.313870846326 211.625447303889  
ZC3H5 122.316617618658 128.952325188088 135.90862211552 122.024487499513  
111.669813610213 169.367702213351 175.960838580876 98.8478655411492  
138.036631806718 162.272853632419 188.734299563005 155.6723334711  
ZC3H6 53.2046867327331 51.0175677516029 42.640829914102 41.0726336841311  
49.1928206164702 58.7404123614695 53.4921736109774 48.6441988290952  
51.5229124652769 66.1851600557127 60.5608545741456 60.4872675915085

ZC3H7A 132.508880040274 138.189579100482 222.336600180634  
199.035083736742 125.735441231594 207.245428311682 97.5962784863854  
123.868848519181 133.541341560868 151.686513723244 166.752205770965  
189.245501343165

ZC3H7B 43.5710871617107 38.3322849790657 46.8267540220952  
46.8954576545929 46.8674366115656 44.9896851005259 38.4005795891396  
35.2642250366721 38.4344387289956 40.6022003765153 37.5583886316038  
33.5578650644246

ZC3H8 42.6036491382658 49.9547657591437 45.4865173433646 40.7481155008596  
55.9283039581662 45.9266745571724 45.1017494688414 41.0381860307445  
46.1101825640108 44.3648993568405 48.6184776976167 52.5752569429057

ZC3HAV1 98.5339473137891 160.499410146402 133.074560812703  
178.961579489906 119.660151314176 179.016449848479 116.993403211005  
128.04037427867 107.610858427836 111.153589230866 100.378474310825  
101.225705082674

ZC3HAV1L 43.6706764143908 43.3016395799961 42.1901757067073  
42.9358255168086 39.9697332660833 35.0427227667176 44.2166118829877  
38.9074189954657 47.1098984140276 44.8997235283254 43.2551508830106  
44.5432192783161

ZC3HC1 288.508774004052 264.855020003755 271.900886756161  
232.516262874696 338.475097952023 240.431987635418 236.759651096748  
232.740032714891 281.688688268815 367.56843259639 343.418685340038  
209.038077542654

ZCCHC10 41.0043775553254 44.8955824420372 38.941855825269  
36.7892997857376 42.1650127805175 42.5193208629123 47.1345949868029  
44.9977782988116 47.5057905459278 44.6918600441328 43.9450023643394  
43.2776458914333

ZCCHC11 122.23209417744 81.0994894489593 97.2615918872914  
90.7345603183196 111.096799408676 94.1128427766432 81.3696465421645  
81.588696805606 87.104092810486 91.4283821919125 96.2799270895937  
114.623641209561

ZCCHC12 45.9090659324223 46.5650556481721 32.3881195727383  
37.5382094267692 37.4470183315826 35.9305494063137 41.8315602975157  
42.9301944191913 38.6322728994674 37.8217989841918 41.7272875295469  
38.8495095797881

ZCCHC13 35.4287975493553 36.9994058279362 38.3166554965434  
38.3166554965434 40.7779767565889 40.9506062495231 38.6243997507646  
40.047314525032 37.0126425326534 35.2880714952489 42.5426057453993  
36.8690774823319

ZCCHC14 225.088911324737 153.685754085722 179.897685693038  
163.493389267264 116.694275999729 192.536546957155 186.265538054701  
116.967446594767 198.190904631121 225.056827821165 236.307055572306  
163.20801480093

ZCCHC16 41.678190413467 38.861780967827 41.2679739649179  
43.4877740913713 40.4639532172338 45.8325181856483 45.223075311113  
39.5466975353131 43.2761454096265 43.128936937037 39.7576136507593  
40.5703581862752

ZCCHC17 215.907790093087 174.275409358652 198.432987946699  
237.4882538723 227.280284979503 306.895449954881 331.984279378726  
322.109212713082 289.625425434103 261.374019422095 209.87862540213  
269.361536809057

ZCCHC2 49.7188990489616 40.2493681589104 43.401782064778  
38.9534635879195 36.2048942610546 41.9543948167375 43.8206425661746

39.3709357615493 41.1742244762318 42.785429206422 44.8872784170036  
43.4709415392696  
ZCCHC24 264.263104842911 80.4334958198115 83.0959169307948  
187.439021508049 144.139555313429 1084.23003918768 90.2915974511786  
131.258204302177 109.137372445043 361.524083649962 375.036941898486  
314.782545392841  
ZCCHC3 83.6080176270653 70.7702047405718 67.6373573669424  
67.1961800572759 109.310200749289 78.6402083787251 84.607833108004  
67.0904616289706 67.0290776715331 105.414552529943 93.8495757442027  
64.7963220317334  
ZCCHC4 45.9090659324223 48.3699741879723 50.3950981988762  
42.357910063876 41.0885562160946 42.4580504587581 40.7910160811527  
42.357910063876 42.5406888281114 43.1839109702714 46.972521499515  
49.3984571719129  
ZCCHC5 37.8877750141557 38.6414316877471 37.3404647796601  
41.4636047919453 44.9384441371181 37.9951997351435 37.830876898596  
41.0844534776541 37.8319142847141 42.233842834629 40.4094901248527  
40.6216891610774  
ZCCHC6 68.0700069295224 62.8885806455128 42.3536549114165  
88.1494891612632 52.0583273941813 60.2083550387718 50.5252048155459  
52.3068458655445 53.838484549134 45.0155543555707 50.2203578628217  
60.8662233098324  
ZCCHC7 155.01005229951 156.433762355183 104.950400251642  
211.685526927495 98.3126451737573 264.116434279258 201.145927216439  
133.810601514962 125.209476374199 240.086349973689 207.957319374194  
222.985386635178  
ZCCHC8 133.453860783605 110.334176022265 129.236597599908  
113.102823481296 114.230358276599 102.322851896214 117.706922397135  
82.2266112813039 138.81810375553 82.6036671634626 96.981661155293  
116.17375251898  
ZCCHC9 144.976378707447 235.018922676506 258.212981181513  
224.60637398191 208.7739716139 269.681925095165 169.367702213351  
100.114114765033 242.751164798133 145.819204020818 168.482495410546  
254.373837233228  
ZCRB1 61.2130609867477 76.9303701148105 68.9522412475296 63.7909104347097  
53.1884505015411 102.020047144427 86.6798536307388 57.8765910878975  
94.4421289055611 80.8593396441328 66.3481553496766 95.1224420992193  
ZCWPW1 52.4179224871914 45.5842286511645 68.6095266659765  
44.6905691366696 63.1443731864055 82.4900927793125 46.8613212048981  
56.0496524902806 58.0722340887264 108.39424630351 83.3729277601518  
68.2309359831273  
ZCWPW2 46.1673159982664 42.1607322031054 45.063792968927  
45.4634652319753 44.2607789091176 61.7091923488929 37.0564573649223  
44.797320243931 46.2027193115397 48.3693338695392 50.0808824383821  
52.1186591838715  
ZDHHC1 86.2021418088902 70.2553917409773 72.6731815563159  
60.620259884953 59.4830424460714 99.6288131333575 51.3064929551674  
86.4898752526885 93.9756797434207 83.877343750194 111.186223357396  
71.8539743926881  
ZDHHC11 45.4507786740825 50.3137882210716 42.9104454767916  
43.074472921841 55.2214187655851 50.8875036861067 45.8159331560062  
43.7731874801003 44.9536076475946 45.6355219961567 55.6468702656652  
49.6203214143464



ZDHHC11B 37.4554876386402 40.8880530359822 38.3166554965434  
47.2009420656854 41.5668884168669 39.8455060654531 45.3597029614942  
38.079222289614 42.2577689927563 38.745552403895 39.9070785037411  
36.064718696392

ZDHHC12 172.381808887528 186.350104132737 149.260740603715  
142.048367760597 118.044483475719 64.7905331739366 296.463473585355  
126.764572234324 169.251790128723 208.22938545273 178.624349589089  
105.91905761474

ZDHHC13 56.8615710057357 82.1809804715696 101.2615980834  
52.7689874529538 70.9179240997848 47.154615851079 69.9214859673839  
65.4206801651661 123.162013735234 63.145797875858 77.0395487594084  
82.1974756449763

ZDHHC14 56.6086202928268 53.6429962450784 54.6820069269589  
67.8978240198575 77.7140342228764 79.6895408438974 70.7238101239421  
66.4207938873541 57.1863195337055 72.42732668079 89.4747568145717  
67.3183506012892

ZDHHC15 37.7384958256497 40.5400384479766 39.1799070031819  
39.7411455670172 35.7973685350741 52.0299937917925 50.5252048155459  
42.157627240486 46.1101825640108 39.2623423164488 42.2618615571566  
40.0557788909923

ZDHHC16 205.480081236149 228.439524702578 233.263058459431  
199.634544522948 226.456072107079 137.658868649032 322.109212713082  
177.82359682336 259.382584049498 215.770028283461 187.147252401703  
223.501516374076

ZDHHC17 87.6861665523251 113.491158368594 114.734157967466  
116.953646515589 69.2787430208317 163.827112371305 118.619819027443  
84.3526980051279 136.332339821167 173.694418385132 168.326515533208  
161.526970033915

ZDHHC18 102.513192587614 173.977605406146 95.6182216943758  
243.672418126374 120.721482177994 92.0136417064806 170.501116810593  
135.540738841602 123.077231445204 110.599131324937 107.792406701643  
79.7238173467616

ZDHHC19 42.3433931248155 38.0226905622357 39.9101908547397  
48.1662933382789 58.5450868286167 36.8059561571675 50.0088611244948  
43.2551508830106 42.1594905198929 40.1179210534118 38.4689132737495  
37.1747156131306

ZDHHC2 44.3355304829989 44.3529919625344 43.0016969050339  
48.1662933382789 40.2449343247539 41.8613406887824 45.1017494688414  
46.2779564481158 48.1174861108648 55.9283039581662 59.0537479001842  
69.4383198054368

ZDHHC20 42.2455707947223 55.7405934254857 48.6037684272115  
50.378948785456 48.9627346956003 42.0574848021044 46.9929836306816  
54.3820590274321 49.1940901905636 47.611018474151 43.7585538437696  
55.8087097725119

ZDHHC21 48.1952521496489 49.7363778831003 40.8420925848403  
41.7614975630362 40.148780650831 43.7630587657205 45.8980298854198  
45.1714698794331 43.0930293831497 46.7646877499666 46.824299585607  
44.6484005362281

ZDHHC22 35.5179217192467 36.2103905554984 38.9790184198145  
38.0958223740111 45.4751076037511 41.554942319225 38.7337086062875  
40.5158867964016 40.5912213523345 41.1222709786153 43.1931731665131  
41.5536168238478

ZDHHC23 38.6454098044474 58.4891791448514 46.7508829977587  
37.9875302985336 47.9128504683618 43.0860383229288 40.4359177791566

50.628152951493 41.863927676552 51.1169368198437 46.8954576545929  
48.6795178347248  
ZDHHC24 108.156702405177 78.0522475574761 66.0411740221276  
101.867388894697 81.929796716054 51.8103411703261 89.1012752492647  
91.7679182632783 65.2125527940945 81.1925839235551 65.2295773603116  
49.9692385479389  
ZDHHC3 109.251112569215 94.3773551105819 137.52864596636  
110.666686474986 140.598583034034 119.647202975116 130.10148014895  
186.450759425396 179.322661675979 132.799542377892 144.300051706447  
199.007437365676  
ZDHHC4 38.7537364570873 40.9731067463382 43.1931731665131  
41.0726336841311 40.2449343247539 39.2985791324641 38.2933870238743  
43.9366081640576 47.7086093893038 38.0078357808393 38.079222289614  
35.3525469364579  
ZDHHC5 115.221134337342 184.048982286364 198.129308943666  
156.976072444343 214.732968482214 129.434864701718 161.366023036685  
132.663052961193 190.27040993548 201.764909400617 152.76005226611  
150.801729138762  
ZDHHC6 230.649032296928 254.159017331462 264.855020003755  
264.071486075874 272.198774144152 225.161257242118 421.279008280368  
394.877241043728 189.865569826568 264.116434279258 266.9457657143  
323.705254926762  
ZDHHC7 518.527535205975 369.717462266442 471.046851874447  
441.872082665398 331.239629083778 385.512974999198 353.213447404132  
210.282066967005 441.247306467645 509.879213331349 428.105433953405  
368.525388695227  
ZDHHC8 747.577738135496 750.151825182993 1073.84987604662  
355.568857981155 1109.17675353971 514.70012608304 553.707482409148  
440.728435508514 564.929183025034 590.139974503603 712.80113322987  
559.9670724278  
ZDHHC9 163.788056447509 206.559526386642 155.908644253547  
103.423003544792 316.419421649196 138.401109242778 235.127539195661  
207.768377497439 178.789064142469 117.293778127059 114.507139252014  
145.073599404007  
ZEB1 51.0225132036905 46.7591817286632 43.401782064778 46.1673159982664  
45.9104478407175 142.846665249354 36.7356360093603 40.2382908228517  
40.137818555383 50.8826620053386 54.1963147679251 70.25295977615  
ZEB2 102.770627167954 71.8576824255215 62.7605715573218 267.232315058148  
51.0107745412152 181.420545696696 57.1070449050465 71.2867274976738  
42.9020321355927 110.729504563799 78.6402083787251 82.8275497073451  
ZER1 86.0796981361148 65.485076402841 75.651446553407 94.3229189690855  
66.6118713143653 92.3477214133335 84.7782034884529 73.6855877240541  
80.4554147910354 124.815448107572 107.971806573919 85.1114448808779  
ZFAND1 166.951916348418 243.110664214453 137.580418363812  
99.6695996119465 216.004059887037 280.275836993258 118.816772641597  
87.4850071876743 114.972374827795 148.255880793905 159.52633805025  
189.865569826568  
ZFAND2A 124.986782737446 103.071727621257 82.6983700200815  
141.087571926258 112.830467116678 132.604567913122 122.720768249799  
132.117013391364 110.869341159607 135.824520574227 116.793627324217  
128.032613585193  
ZFAND2B 162.683322133983 151.472676874224 183.2003374677  
179.07886477603 154.633672616367 174.117816184497 152.72007888133

122.143519601825 202.360546931172 171.468580016846 139.945446129591  
 136.125236142909  
 ZFAND3 239.590143292142 192.216758313982 176.653849515825  
 249.002758392739 179.322661675979 205.279698624867 235.33716196909  
 148.595294991115 240.6614822416 220.03226547675 226.672191323896  
 172.192366002756  
 ZFAND5 1421.44237064813 1780.14552702126 975.544591158047  
 2138.23653387331 2138.23653387331 1607.73526966988 2650.09507972593  
 1835.21901524331 1387.28483887704 1611.35913846618 1868.51164332659  
 2248.64628069362  
 ZFAND6 105.247736284747 121.782045054657 91.7579171517883  
 116.694275999729 120.231435193839 129.014076422249 114.611557317665  
 74.5822971881866 118.696127260286 58.4372717138827 73.4447529556358  
 110.785049776763  
 ZFAT 40.2087556903277 44.5152708955623 42.6920011548175 40.6892234267786  
 41.7929491793697 43.0144844590744 40.9157352260901 40.7311497914871  
 43.1180113655693 41.2276963324981 44.1533327883807 39.5418280570561  
 ZFATAS 38.6454098044474 41.3277288245157 39.9519547348106  
 37.7146582037126 39.9283177178222 40.3946758935842 42.0605906240248  
 37.0390589468421 39.3506426665347 39.2623423164488 35.9563099719284  
 35.9604262434141  
 ZFHX2 42.6036491382658 46.0023068797812 39.3709357615493 43.1847628331565  
 44.5668141895992 45.3882138838137 45.3597029614942 45.9604707098953  
 43.7630587657205 41.4397539024976 45.1432412071268 56.4578213622965  
 ZFHX3 245.996655628334 517.104607715151 529.430648638878 151.438409623226  
 458.230500859847 327.36921955924 540.304257899761 765.145138238955  
 356.826869112433 476.421959423835 555.727708387209 389.026128346842  
 ZFHX4 55.9249770393176 41.4508241771315 38.5045333213784 38.745552403895  
 44.9936360641969 82.4900927793125 39.8695929627783 40.2382908228517  
 57.5883027758003 74.6847594297153 62.0404348860702 61.0025829061063  
 ZFP1 48.8333989709933 47.5647821785529 45.1569741609597 39.4569929845912  
 41.3387790895716 46.7386599624801 48.739479557328 47.5950227477807  
 48.4497719907777 45.1569741609597 45.8180710486329 46.2625470410195  
 ZFP106 178.643141452509 155.310176479895 119.545018066492  
 221.450737998571 203.152852313746 458.861461526841 136.979357314656  
 225.300736968225 158.01463829244 334.813163079302 280.622184239624  
 398.43592055172  
 ZFP112 62.3042205863409 48.109747794187 47.5673419710251  
 33.1817617228171 46.9906120932727 50.4022543872993 42.8684958525042  
 47.2009420656854 46.9739160257217 50.3388505346542 48.6767028205398  
 57.6075177910677  
 ZFP14 43.0930293831497 44.8529259387308 40.0998167098057 38.3166554965434  
 39.0564222526273 40.7616966228404 43.6753843488695 44.7044140979108  
 43.3744503319109 54.4825201506931 42.911855821602 49.3087627580849  
 ZFP161 103.727217972304 121.236881661832 121.992700597635  
 112.100074154279 87.6178717341967 111.009050621499 128.391264770998  
 94.9654919877791 108.27606179864 98.2843999216669 94.428252478069  
 84.7058085717914  
 ZFP2 60.9710783023013 41.554942319225 42.7303139017786 42.5664883002833  
 44.0451487108213 71.8466937395628 39.1539892144371 47.5950227477807  
 42.8036731479932 83.2925226467532 61.4800543360853 60.3816817102326  
 ZFP28 41.6354649482853 42.6939394537076 45.2313723727673 38.6414316877471  
 43.5544347011646 47.0027453663546 40.4359177791566 42.8482181313226  
 40.4997186069494 60.6266092582071 46.2560238004757 45.0035308952466

|         |                  |                  |                  |                  |
|---------|------------------|------------------|------------------|------------------|
| ZFP3    | 80.6434122355417 | 82.4362183543935 | 53.3127618245672 | 73.8480604979804 |
|         | 80.5437011468815 | 73.5743059777365 | 83.6935756500468 | 63.4570909617664 |
|         | 67.591570323687  | 91.1057573288203 | 78.5325880060762 | 73.2234405348435 |
| ZFP30   | 45.9090659324223 | 49.3581578587582 | 35.5220586859301 | 40.4359177791566 |
|         | 35.5220586859301 | 43.4681646416585 | 55.5578334877425 | 40.047314525032  |
|         | 54.113533179847  | 52.3304586399695 | 55.1804535845496 | 39.8497227447888 |
| ZFP36   | 804.592753722875 | 3166.48568397766 | 3905.8371644287  | 3546.97585966225 |
|         | 1086.12171444149 | 5895.03230740197 | 4406.55576617324 | 3217.83121827744 |
|         | 864.302844775203 | 1069.3975598703  | 2045.24530722676 | 2002.0536042686  |
| ZFP36L1 | 268.047342640491 | 283.747865829282 | 254.792341536652 |                  |
|         | 326.055799445169 | 452.797096652556 | 448.508714709248 | 184.808179948172 |
|         | 326.055799445169 | 345.36940514835  | 308.231730523135 | 331.474920376907 |
|         | 478.799250340246 |                  |                  |                  |
| ZFP36L2 | 122.0305509548   | 486.487366153374 | 423.254211470935 |                  |
|         | 315.487514440864 | 284.942182200489 | 386.00975855841  | 143.497887869284 |
|         | 230.975122271137 | 253.237824005249 | 79.9810256029665 | 119.277678423944 |
|         | 125.512567429299 |                  |                  |                  |
| ZFP37   | 74.2151462073098 | 49.2934904960601 | 55.2141529491512 | 63.0153175111747 |
|         | 45.6895223823001 | 65.9014252111112 | 89.1012752492647 | 52.1788489555942 |
|         | 41.7627910693483 | 74.3187437598836 | 72.3822545261582 | 56.4578213622965 |
| ZFP41   | 37.2474303302343 | 39.4629815741023 | 43.5710871617107 | 39.5637454855233 |
|         | 40.0145811166794 | 41.6590564937735 | 46.9929836306816 | 39.1128725343972 |
|         | 46.1634822993009 | 42.1622837416589 | 41.0476065156912 | 37.7315666632629 |
| ZFP42   | 43.0930293831497 | 41.0678614026819 | 44.0451487108213 | 39.1706564265495 |
|         | 44.3557408297309 | 38.4330755397458 | 44.8643898647322 | 51.1694248620208 |
|         | 37.6383530120621 | 42.3606390470387 | 44.2925355984056 | 40.0557788909923 |
| ZFP57   | 45.6517320730042 | 43.7644428186265 | 49.3000844711116 | 47.9915414951747 |
|         | 54.9249759425252 | 42.8598805316863 | 56.6537562775715 | 50.3972033014227 |
|         | 42.2577689927563 | 42.785429206422  | 44.2142581488029 | 44.0451487108213 |
| ZFP64   | 54.4384603094793 | 52.502055890816  | 50.656598108034  | 51.8610060995363 |
|         | 76.8393340617473 | 49.641159251878  | 54.4313108506244 | 54.2877981508636 |
|         | 53.5473283956867 | 55.4635297192076 | 47.9269108813022 | 50.0159415986047 |
| ZFP82   | 88.2959958615748 | 54.113533179847  | 45.8844325913247 | 67.8978240198575 |
|         | 56.9360840563854 | 89.2185019250322 | 92.6545309624315 | 52.8622615027833 |
|         | 80.0113001016496 | 112.551747307723 | 78.9088042058577 | 78.7496673195407 |
| ZFP90   | 218.354538624978 | 149.118265845458 | 423.896735383118 | 140.504336039225 |
|         | 194.502731496189 | 280.820745089796 | 200.203393423652 | 336.159430045964 |
|         | 242.450054864856 | 290.031202636467 | 283.88971280023  | 235.222472959869 |
| ZFP91   | 256.215133513379 | 337.51861578231  | 284.241284057415 | 360.15483218921  |
|         | 332.882251013334 | 338.846080983216 | 338.846080983216 | 315.960715273629 |
|         | 392.622487173359 | 406.668753694984 | 299.74710723735  | 411.114836576804 |
| ZFP95   | 37.1485601150873 | 38.3322849790657 | 37.3687900733549 | 34.3595588146954 |
|         | 36.3390947880186 | 42.6575535390785 | 31.6981395162348 | 37.33030683349   |
|         | 34.8552366193358 | 39.2623423164488 | 37.1059647239814 | 39.2469742642337 |
| ZFPL1   | 73.9986015964321 | 76.4439037944547 | 88.0928147176452 | 63.6334154351075 |
|         | 110.411217828763 | 74.0995052892511 | 136.629336440719 | 69.1973371867031 |
|         | 96.4112435621587 | 74.8170892324966 | 79.3875629814087 | 66.1650385535549 |
| ZFPM1   | 259.332340491331 | 234.078434290473 | 246.820301517765 | 134.952392466784 |
|         | 215.609821689043 | 185.899535522689 | 239.838643553139 | 119.670948133232 |
|         | 136.504157082236 | 194.716672574835 | 195.221917652149 | 122.482560090133 |
| ZFPM2   | 63.200752695983  | 41.4508241771315 | 40.4882741869718 | 44.9370339275041 |
|         | 38.4540849632254 | 127.701556328274 | 40.3302268293707 | 43.4544762830742 |
|         | 42.992884918158  | 60.4837400912239 | 54.7061116419212 | 62.0967404944031 |

ZFR 188.713487905549 175.820979889343 145.250323683031 198.497745548245  
 182.49650467392 224.173852018278 219.737294408079 203.334053441063  
 224.231862271463 228.054565950253 219.134220280612 278.378459771943  
 ZFX 48.9906383294199 51.6060290544385 68.4720753153522 58.9168466928565  
 56.0477607422828 90.99086730704 57.2758638871082 51.9447450229707  
 89.6115806694241 48.1392888470269 61.7572675712557 58.4200819624972  
 ZFY 54.4825201506931 50.1520209533747 43.3085358214154 44.1483976313959  
 37.8242236505241 50.9724155054821 43.6025443656008 52.1062000766427  
 48.8842909466002 49.7728344236992 50.5188367542048 53.7442594289333  
 ZFYVE1 48.5123041297835 48.0570064280814 45.4634652319753  
 42.0621425894624 47.27543600687 49.8135461150818 51.1541843174981  
 52.3068458655445 49.9547657591437 46.2286164776607 49.4593570700221  
 46.5905131500956  
 ZFYVE16 75.4732674021193 69.3106426188075 75.2519194195288  
 128.157032116902 63.1443731864055 73.4820932957859 67.5206810636627  
 64.8834542087618 70.6784633355742 69.3599873705996 76.093116738739  
 79.4710406831985  
 ZFYVE19 280.338993896267 159.554916039519 131.882285871258  
 123.978615472736 191.116764060948 139.554519110944 368.246708866999  
 282.802560118785 168.326515533208 261.138426747953 171.938863440177  
 183.702709922933  
 ZFYVE20 410.979796414875 274.398580571984 182.80711310964  
 206.28819203182 299.706257810523 421.279008280368 307.394333843045  
 452.797096652556 230.664926508522 427.679475038106 337.441212908704  
 280.034472186873  
 ZFYVE21 562.258108316474 314.609371608151 884.036280777358  
 319.408264906288 412.694325761831 618.892379887961 394.764369100963  
 384.522115820048 774.8306350567 1073.84987604662 1129.19103016599  
 863.082385199922  
 ZFYVE26 219.737294408079 149.792346524401 182.685579297058  
 337.013669560645 147.388500451427 151.36347984261 123.868848519181  
 144.17470770145 130.600539398332 161.180847265279 160.152738034528  
 146.997252473598  
 ZFYVE27 47.7779356299965 57.3417959180493 55.9230048290528  
 48.9944486068347 46.0493141231657 47.6803619768589 58.5087296620514  
 46.4329203134841 46.1101825640108 51.3907321092333 59.0047891751497  
 47.6938628797168  
 ZFYVE28 43.844855336215 42.0709558258414 40.301483914446  
 44.1483976313959 42.9090346219023 38.6414316877471 36.3194282084339  
 38.1835938174625 42.8036731479932 48.3693338695392 47.4630625313159  
 41.9430737035925  
 ZFYVE9 41.0043775553254 46.1131345131683 43.7630587657205  
 38.7012264805355 42.253702372605 48.5136862664526 44.9326464250932  
 44.2479126216872 43.3744503319109 46.8236022402545 43.9450023643394  
 44.9734311311394  
 ZG16 38.7537364570873 42.7775752471711 41.3366779545815 35.6928955245309  
 38.745552403895 43.1826328292558 45.3597029614942 43.9366081640576  
 38.0213051227859 39.8873706855774 41.0050831223107 41.0657892043496  
 ZGPAT 90.4909052059366 108.493693862509 123.114162330406 122.136867360309  
 94.9808934532248 91.1707965298745 103.216483345636 124.22494803053  
 89.737418965763 108.838406710326 105.953705702398 82.3254961129575  
 ZHX1 46.572043843509 60.8976148193383 50.0050760710506 40.9607305725196  
 51.0821269237347 67.1387898740161 45.0354975949777 45.2203079317002  
 63.6222532132037 49.5542154724118 55.5789922793469 59.0308764112247

|         |                  |                  |                  |                  |
|---------|------------------|------------------|------------------|------------------|
| ZHX2    | 184.750252804038 | 125.154933118907 | 67.6373573669424 | 126.69706456173  |
|         | 92.8644908993284 | 140.504336039225 | 112.805898501551 | 95.6215575902122 |
|         | 107.420552630045 | 134.749803376372 | 121.318996374586 | 89.2503940049313 |
| ZHX3    | 52.9240098541574 | 41.8848959280916 | 43.6670755115848 | 42.5664883002833 |
|         | 47.0954207417646 | 76.1991031349451 | 39.7576136507593 | 41.4508241771315 |
|         | 40.137818555383  | 57.8585041080995 | 66.274247400793  | 61.9036392303558 |
| ZIC1    | 37.4554876386402 | 42.7775752471711 | 41.3366779545815 | 36.6501141438378 |
|         | 28.768101860452  | 31.4686555405126 | 35.4623691645629 | 41.0381860307445 |
|         | 44.4395580493118 | 36.1550293353654 | 39.9899430628542 | 36.8690774823319 |
| ZIC2    | 149.386774957393 | 50.6774883370457 | 69.6554376880691 | 39.066284740632  |
|         | 75.1674447943072 | 46.263826584899  | 84.4422623834916 | 36.5393857306744 |
|         | 139.590367312743 | 45.6868589181768 | 38.1835938174625 | 41.4508241771315 |
| ZIC3    | 36.5393857306744 | 40.4359177791566 | 41.6079958749402 | 35.6027791404152 |
|         | 42.6022652963326 | 39.3841861812262 | 40.5585676679482 | 39.1652965788406 |
|         | 36.2733735494625 | 41.6373771565199 | 42.357910063876  | 39.2469742642337 |
| ZIC4    | 43.3638918705225 | 40.148780650831  | 38.5045333213784 | 38.2041059863839 |
|         | 43.844855336215  | 41.554942319225  | 39.8695929627783 | 36.0306975524309 |
|         | 34.9428206949566 | 36.3612409063792 | 39.153226699662  | 39.4490233720848 |
| ZIC5    | 39.0620487644635 | 41.6466169548846 | 43.0971787292711 | 42.0102671859606 |
|         | 40.9950639693255 | 41.3553369544097 | 45.3597029614942 | 43.2551508830106 |
|         | 47.9035532886869 | 41.1222709786153 | 43.5710871617107 | 41.863927676552  |
| ZIK1    | 46.9939712192224 | 59.1938299291358 | 55.3812135024656 | 47.481302504066  |
|         | 66.5187917407182 | 45.9266745571724 | 74.2690269784394 | 43.7396619462033 |
|         | 73.1215732923523 | 52.0999467564713 | 50.4740079109854 | 61.4366256816323 |
| ZIM2    | 40.4639532172338 | 39.3999056968598 | 41.9666541498638 | 39.5050383901884 |
|         | 38.5512429290626 | 40.5281496800812 | 48.8319884367456 | 39.3709357615493 |
|         | 45.2897806651929 | 39.5637454855233 | 43.9450023643394 | 42.7782216342806 |
| ZIM3    | 37.0320432433314 | 32.5482839399637 | 33.281531405287  | 37.651298468202  |
|         | 45.2556760873335 | 40.4359177791566 | 40.6750540874299 | 40.5158867964016 |
|         | 38.5252456306656 | 38.528621456378  | 40.2649309204478 | 35.9604262434141 |
| ZKSCAN1 | 47.3791873993182 | 63.9179552265502 | 61.5824518349507 |                  |
|         | 49.1786207920603 | 49.8304479381623 | 59.5979861826984 | 66.4258159334241 |
|         | 51.2623287419357 | 48.3954967265007 | 79.262977183608  | 54.7061116419212 |
|         | 56.6146179789815 |                  |                  |                  |
| ZKSCAN2 | 80.2650269182886 | 76.5411379733694 | 70.7238101239421 |                  |
|         | 91.9185612536409 | 98.9988668602468 | 69.7677752398541 | 88.1861828863404 |
|         | 81.6529991377083 | 73.4122412764173 | 107.722626390174 | 102.471939526704 |
|         | 70.25295977615   |                  |                  |                  |
| ZKSCAN3 | 50.7390160399184 | 57.0875538213735 | 59.4431489877328 |                  |
|         | 46.4555908533915 | 71.0593419018503 | 51.1621379498014 | 89.4747568145717 |
|         | 95.0350792557735 | 54.998510746958  | 72.0443425395404 | 67.8570354010492 |
|         | 59.0894921452893 |                  |                  |                  |
| ZKSCAN4 | 83.374777060444  | 62.801431502597  | 81.2850357499192 |                  |
|         | 63.1604223919703 | 89.1012752492647 | 55.9351706773613 | 106.486195938039 |
|         | 74.8893925448138 | 76.5444845463963 | 90.4160198134865 | 80.1419822448876 |
|         | 82.5312123120641 |                  |                  |                  |
| ZKSCAN5 | 57.3797835448761 | 49.7949228653588 | 45.0115870036541 |                  |
|         | 53.0284011078097 | 48.2748123114598 | 43.8582747295766 | 52.0942589368478 |
|         | 51.9085809948666 | 55.6151308605445 | 56.1912096308988 | 53.0177144132449 |
|         | 50.9506778292488 |                  |                  |                  |
| ZMAT1   | 38.5007204246293 | 42.0418171513817 | 42.3962308437248 | 37.9116800161496 |
|         | 40.5710637884029 | 42.0902716047029 | 40.6301588195752 | 41.0808257270221 |
|         | 39.7107284579423 | 41.4606714407332 | 40.3452320167286 | 39.6938066205531 |

ZMAT2 355.642611713396 334.349204174886 519.351335801817 405.322894577918  
360.900649927623 357.111253129662 376.453560620912 449.059703234741  
254.920345078558 296.176349059192 361.632211543977 443.269396125834  
ZMAT3 1981.03929621057 1201.00042684883 1221.31634960736 1141.25078954012  
884.036280777358 888.56944380788 1250.15619347362 1673.60994518271  
898.114119553014 1806.22468459769 1969.8871504719 1618.92099084622  
ZMAT5 89.2385568686014 85.417321091835 93.6591201235745 104.232196493024  
77.6174893940285 108.881703882906 133.823107212467 72.7934987008399  
112.591529656786 77.6496445815897 81.7500436717038 98.9767421163141  
ZMIZ1 517.664764759512 1110.39060103557 954.116675685628 1093.84714207969  
463.84209540456 569.511773053233 501.319993127353 480.13416648493  
1468.75291542154 761.341795853104 706.087945508248 796.359355922952  
ZMIZ2 127.694844372277 96.4278951689874 98.2581979415778 88.4717765234098  
112.000099082544 71.4518820434918 89.6056978251991 121.050369804136  
116.540209248478 93.5511826850067 86.4725057696307 79.7238173467616  
ZMPSTE24 865.63777294494 639.778130093087 468.98857415608  
581.093069802913 1048.98028527123 734.143790759359 556.092573451208  
1039.06999658544 1194.10154988793 575.268446033282 526.750242877914  
576.830397705584  
ZMYM1 68.4352167527791 83.9271508264168 91.6033269431304 104.99788782377  
105.589475270494 78.812106589086 140.01041112896 169.790843803064  
114.404099081799 115.643361390258 101.008449241109 101.403739410832  
ZMYM2 77.3752541676627 85.8087881787018 113.892432984334 70.8835636550472  
97.4137766910365 78.1351673826829 71.4414688202373 85.2000385588819  
97.0348634204639 110.517563101892 84.5267954034597 103.146623798256  
ZMYM3 57.165971310746 53.7554360529143 56.9280216270272 44.7520317855773  
56.2708028789254 48.1167207436826 60.877229406755 54.0507720792049  
68.0010662646828 67.3934788330567 61.9753438182501 52.9153129566242  
ZMYM4 91.3967044940546 117.474987556447 100.43365828852 106.8866235778  
144.290966198687 164.097531361519 133.060894083935 153.595112580363  
127.115038236278 159.359051158123 144.771861156788 137.378222527303  
ZMYM5 50.5670783769975 57.0875538213735 62.0500352705887 54.4586176399381  
64.9072331703985 58.8605811695948 52.0942589368478 49.5544686779125  
55.9423752286714 47.0055981216687 46.8954576545929 57.1021912253879  
ZMYM6 119.714551585774 150.387474375456 180.562005428669 197.259755509929  
193.60925192949 194.862177434028 146.90802741139 94.8884063433735  
158.156217755244 135.106756607914 141.067111495922 248.321641540666  
ZMYND10 43.1805016690297 42.4493032770053 39.2707964550441  
47.2009420656854 48.0234896130991 38.4330755397458 48.8319884367456  
45.5581356216957 42.0621425894624 38.3092241935352 44.553780984244  
43.2776458914333  
ZMYND11 269.745248423773 239.885284409329 322.678762360476  
247.547769833089 269.113996642102 511.792908607692 261.929727465462  
354.861943266984 216.911833562615 382.744696166534 412.162238678684  
380.278389209918  
ZMYND12 49.9419897484381 48.4497719907777 44.4311655729487  
48.665578118898 45.3675390992851 43.2805590023412 46.5650556481721  
49.3880946790306 52.4539007817929 63.9129423266349 53.8260140375214  
56.7711602236706  
ZMYND15 98.8719561245756 71.8576824255215 82.2266112813039  
170.287619901365 62.1836961153924 79.1922819549042 77.7615826856723  
73.5950442915143 53.7442594289333 53.7196173866021 65.342842101283  
44.9070250604284

ZMYND17 41.6354649482853 44.2105195734073 40.8420925848403  
42.9358255168086 39.4693871570028 37.8102105794655 42.0605906240248  
41.2551966132486 43.9450023643394 44.2580151149956 43.3085358214154  
37.6557714476853

ZMYND19 313.080592198795 226.202485756581 173.308366696429  
149.629940171074 359.381284202484 168.492959515167 586.735744054398  
204.502683458676 251.4927207704 168.247603128156 174.392758289374  
138.599959012396

ZMYND8 156.476627024647 130.313381811168 118.745729915256  
73.1447139654971 136.429803886927 61.8757975011721 96.593956699892  
83.8726595797859 131.156876010639 101.523741547876 93.9018973330737  
132.646267783456

ZNF10 76.6868184563568 59.8400088701028 58.2986825661503 60.3481762331447  
57.5040500497076 71.7585486695516 59.3549213146532 53.6210959113222  
76.3790849853724 127.789065386943 95.0604882262201 77.4769634299218

ZNF100 40.6957787921451 43.826317180678 37.3687900733549  
40.8681871019812 41.0476065156912 40.7063426028871 40.2601451506332  
39.5083491499018 38.1658452457336 39.4710743516517 38.9240290061433  
40.3691324547049

ZNF101 44.6231541342 56.8373628733077 50.0050760710506  
64.6945454069792 44.8897737954573 44.6524308640784 48.8319884367456  
63.1604223919703 47.7086093893038 44.4652605017595 51.838002904753  
51.138877923954

ZNF107 43.0001432913058 43.0227387991135 45.1899271235974  
40.8681871019812 44.9936360641969 42.808889470973 40.0052661202207  
38.9074189954657 43.510508423355 41.0057887014368 42.5426057453993  
41.6031169661721

ZNF114 81.4269715766354 45.2556760873335 42.7303139017786  
39.1706564265495 41.0885562160946 42.2577689927563 49.1928206164702  
45.9104478407175 44.6717213146407 46.7182294568603 49.9338905397767  
46.5905131500956

ZNF117 39.9697332660833 41.2598458726002 41.554942319225  
38.8964578286293 37.10170285405 37.842873463785 39.0759686770589  
42.9301944191913 35.0033376705042 39.3698811593364 42.4162492820012  
35.6427313468066

ZNF12 44.2350046179299 49.4982025424177 51.7138050344355 48.1662933382789  
57.9161791762225 58.5530199658661 60.5125774827425 55.9303347977781  
60.8635925649592 57.9713749600418 70.0965466297064 58.7382738968248

ZNF121 43.0930293831497 42.5269793679335 39.9101908547397  
38.4208429103799 39.6535880152834 42.157627240486 38.5066108855005  
32.8834169462007 39.9444191873552 41.0057887014368 37.2892641289258  
41.7575097298927

ZNF124 40.9141850646578 56.5933259268408 42.8723769353017  
43.3078542962968 44.2607789091176 37.0725935143353 47.5130990528612  
47.7508139534968 48.3119523820103 38.528621456378 42.170702295259  
44.1063440402552

ZNF131 32.9174234020987 43.0971787292711 39.6451483836089  
33.5578650644246 42.1650127805175 35.7034203372528 36.7356360093603  
37.2237132058632 40.4997186069494 41.0057887014368 37.9946685306274  
41.7575097298927

ZNF132 39.4710743516517 42.6022652963326 42.3536549114165  
44.265834798964 46.0043807840705 45.0882356578404 39.8695929627783  
41.9315419791594 42.5406888281114 44.3648993568405 48.4717951775049  
48.7814131120945



ZNF133 88.3799086910448 89.5887648181505 113.82565808481  
78.5141640924736 137.551493752877 125.364451149941 128.635811501506  
85.2849531543957 79.7882961549974 141.960773054307 126.79509061532  
106.5477041881

ZNF134 70.6065558064758 86.9032093551446 78.3378279021752  
60.620259884953 84.5572894783679 79.8026267036553 95.6697427870979  
60.2691630545162 95.2018660650205 90.0767501615808 80.9821967801845  
87.4273245333478

ZNF135 66.7759319948677 60.1685144469519 49.7350276169552  
56.9299697426319 45.1137938810047 93.9805435116156 62.1970616836737  
50.3972033014227 34.9428206949566 126.156748063621 107.391994714261  
97.0589984189239

ZNF136 43.6177016821274 46.3390850717989 46.5237495629567  
51.7739270955254 43.1826328292558 50.4022543872993 50.0088611244948  
53.4735821194294 48.6171311968573 50.8460732110055 53.0469715261468  
52.1918130336397

ZNF137 66.1229691315616 67.8999127712557 53.0630927250439  
47.9915414951747 56.1186281675573 59.7009992986607 56.7780520416533  
47.2009420656854 67.9176876913772 64.428683021978 63.3544794716167  
76.5411379733694

ZNF138 46.29198852834 48.551327455445 49.1067959632109  
43.367124590178 49.0145368354835 43.2805590023412 49.3067361345568  
48.0283573444179 51.8396275386273 44.9673049606589 46.4205654140754  
49.904979214379

ZNF14 1236.32289322872 653.880422442079 795.381998233245 957.682898193927  
506.173054520807 440.421077161585 842.82310025167 1939.66920192372  
511.792908607692 1656.16581692717 2167.91218703382 1493.20520979227

ZNF140 74.0913177754682 44.7829632472754 51.1347974668251  
50.0526763693329 38.5512429290626 39.3841861812262 51.1541843174981  
50.3082459161777 48.8842909466002 40.8049408996274 49.2206713037152  
53.3059058105836

ZNF141 36.0144420013819 41.7337506166619 43.3085358214154  
45.5869891570251 39.2608760193011 37.8102105794655 40.3302268293707  
41.1575777497576 45.0017158586743 39.9948390976317 38.4689132737495  
36.3454320848591

ZNF142 74.9006142438341 73.1640951333742 76.5699943825825  
66.4047895961325 93.0626550693989 63.6894484284172 69.1414574152997  
94.6432868887401 67.4304134449444 70.8749669449099 72.768998788927  
70.3629652777935

ZNF143 84.0388582916959 84.0691608193405 89.2285288333749  
188.336316985251 91.7629175712824 141.364814429951 96.7125250803971  
77.8946473414547 102.220824629896 71.2409890549638 90.3531863862054  
126.500059295217

ZNF146 160.080366694799 118.483499958227 109.877541092909  
95.5530572805104 218.552143403657 121.92772785579 218.19156738004  
239.569514501529 223.316311787046 144.546897317106 109.677588309718  
134.952392466784

ZNF148 199.079207384598 218.917221711155 227.243009473121  
434.37356010024 263.832968124343 317.483708873867 427.281740164881  
457.352802877198 115.840734064724 361.861166927682 585.054570630252  
312.648013979436

ZNF154 42.3433931248155 45.4882438975269 49.1067959632109  
45.0798408927912 40.4639532172338 49.7458652239071 48.6395795163502

45.8669209716694 47.6195009345747 55.6865353018811 56.4873776344986  
60.8662233098324  
ZNF155 40.3180310664156 43.3889851892323 42.1860813954352  
42.7431359850339 40.6373400186325 41.8613406887824 44.1350486752012  
42.6008809597607 44.8681974656149 41.9666541498638 41.5706032595492  
39.5693390837225  
ZNF157 36.1232327599945 35.8227939208521 36.6522278218553  
37.8442841690502 35.1411239266238 36.0306975524309 37.7136011474903  
33.4534810696886 42.5406888281114 38.8507804383261 35.6041926503637  
39.2469742642337  
ZNF16 80.1378352697519 67.474556589181 54.9944485073259 52.6947911480086  
62.8270556619309 65.6914955077809 67.9410473129639 48.8279236678287  
69.5741225986433 71.8394138241546 69.6097529955737 60.7741670229412  
ZNF160 76.7254010150417 72.7381690659677 92.9453353261232  
83.6351558609087 61.5807110546718 80.4404044229341 95.3145142003966  
80.0502531022254 85.2893380711323 100.205124008648 95.7125018118399  
98.8478655411492  
ZNF165 167.273775508231 164.847648206552 60.1874689914535  
66.224559122062 147.704325041249 54.2503023961401 207.957319374194  
351.538247518953 103.631449539809 59.1496467460507 71.5249259772583  
70.18107651423  
ZNF167 43.4173515108896 52.1062000766427 42.9544982810566  
41.3610369241157 57.1332888137991 45.3882138838137 52.0042367882776  
39.2151045217645 46.2657906047993 52.2256177934134 48.6767028205398  
50.0253648658597  
ZNF169 39.6609238036815 45.0115870036541 42.8270038153139  
46.3203995372658 39.7568367479301 43.6670755115848 39.1539892144371  
41.5464765641928 45.8325181856483 48.2596564318071 43.6629145624937  
40.9683275553869  
ZNF17 72.9154861179393 104.492750153479 96.4740168904128 108.025082988807  
117.689172019617 125.81889994067 110.589130460258 97.7415824971555  
131.645714321903 139.328628553223 144.771861156788 123.978615472736  
ZNF174 49.9114322224644 48.6447083765118 54.8619797728635  
44.265834798964 47.85605957099 51.4931742685391 42.920675777463  
46.1673159982664 52.5772854102326 53.4109882045447 50.5810338885769  
50.2391482329046  
ZNF175 57.2008272301399 170.358845945725 35.6139301508335  
64.6945454069792 61.6452971581503 65.0774755750423 64.5722284870633  
49.3880946790306 64.5347406608537 96.0236731791095 87.2316853416374  
85.1114448808779  
ZNF177 84.6279355865799 68.1040271620925 69.9179689232341  
66.224559122062 42.4864576619427 78.3488426553071 57.2758638871082  
74.2517888452553 62.7205631511304 79.4158467034017 74.466989900636  
60.3816817102326  
ZNF18 106.219480656782 102.993620677265 117.993433347556 112.000099082544  
95.7639712596394 95.1468654370952 84.5180930520475 104.587564056763  
87.8724689898823 137.831070407907 140.465247047676 102.899135663993  
ZNF180 34.8099089553046 41.3610369241157 42.157627240486  
44.0451487108213 44.5668141895992 40.3357777530419 38.5066108855005  
37.2237132058632 43.7630587657205 38.957687788868 40.2649309204478  
47.3172462673426  
ZNF181 42.6036491382658 45.7979032939211 44.6032218589199  
45.0798408927912 41.1868052124344 46.263826584899 46.1634822993009

39.2672712041774 40.137818555383 38.8507804383261 38.956280281655  
44.0451487108213  
ZNF182 65.1251519077199 58.9695927558921 64.5232087947596  
59.7044210110693 46.5557478175976 56.3293881184854 64.1607001437806  
70.0697974278875 63.9851732498913 63.0119737420787 57.0514418438652  
60.0517078759277  
ZNF184 47.9175508887533 48.0296332183129 37.1643693306382  
43.6726153508978 50.8875036861067 47.2927436772465 59.3549213146532  
50.3972033014227 43.9450023643394 42.6793753550854 49.2206713037152  
47.2131144508464  
ZNF185 71.2963721541702 186.965367827758 129.810477623628  
97.4967204298499 84.0996028277101 62.0660509811111 120.231435193839  
209.87862540213 171.302214895226 186.759757179509 154.93193897888  
175.876518898179  
ZNF187 65.7259084183743 51.7983110178095 56.2851430356168  
59.8102324370568 62.046151104685 71.7263663921367 75.5034623354897  
75.2101993995344 66.8077748120381 97.1201502245778 77.9493708990494  
69.727028012962  
ZNF189 80.0866955521632 74.2180011215707 64.1442136854628  
101.773569535303 70.2888664894537 88.4695322145032 85.3754356809649  
72.4834467838798 64.830448408529 82.1062834830477 68.6199296680241  
85.4420599474339  
ZNF19 40.148780650831 39.0894172982439 42.0621425894624 39.6292788039793  
40.0599807618105 41.7627910693483 40.6750540874299 44.797320243931  
42.0621425894624 49.7259371799014 53.4921736109774 34.4570158133896  
ZNF192 37.8877750141557 42.9020321355927 45.645828394758  
42.1273928203021 45.8669209716694 48.1310137493545 39.7162631015511  
40.4639532172338 43.0456011922275 45.2023300009435 38.1835938174625  
41.863927676552  
ZNF193 237.443715611786 151.135296427249 144.858109227889  
92.2530518251152 209.038077542654 118.899737794318 217.226686591407  
214.823948126294 120.679433440203 156.259762538052 148.871702513875  
137.52864596636  
ZNF195 88.3799086910448 125.290426098227 91.2769094348604  
99.8063480813138 98.7869013773721 83.955786676926 124.803597244786  
126.038716672534 105.63434679637 104.672760332135 101.888001006345  
160.755701876741  
ZNF197 47.3791873993182 45.9732108120834 47.1629799536297  
44.4367387274922 56.1186281675573 51.3438109941698 44.7255207589606  
44.2460658853547 48.698412417388 48.8931642999886 49.6222213022485  
54.4992295592001  
ZNF2 47.6397712007919 47.7246924920997 47.9035532886869 42.1622837416589  
55.4345579421782 46.3203995372658 45.2852528185486 47.6388115824631  
47.6582396278888 55.6351010690528 55.1804535845496 47.4699236780425  
ZNF20 93.2557602398938 100.02732841841 72.9051985681184 77.2218991550552  
59.3611824459962 64.5187138759372 80.5457814044192 99.7445419301229  
81.8983491901699 100.756165194192 84.9601800557888 96.9944911507111  
ZNF200 59.1716224344299 58.2226305471537 57.8772482723463  
92.8951148347802 58.1075310818319 54.784140134455 58.4372717138827  
45.3530683538086 65.6003544901554 49.0276886361915 53.20218962208  
52.0790463576436  
ZNF202 50.1533437545239 51.6060290544385 51.4308501933893  
46.1673159982664 54.802736966312 39.9397419279057 44.9863726205428

47.3791873993182 58.8201021345225 40.2112371512838 51.524711857679  
50.7487159427973  
ZNF204 39.1590964332473 42.7775752471711 41.1367478979484  
44.1483976313959 40.2449343247539 47.0027453663546 45.7452456977857  
45.0972184964705 45.5779686360641 48.1392888470269 47.5439485437351  
50.656598108034  
ZNF205 58.0139597055449 51.9635228411223 68.4720753153522  
43.8495248991589 56.7602749462766 53.3995745404636 65.4784797364469  
51.8347877274018 72.2720428359203 64.5347406608537 71.3527183280827  
52.2832912331043  
ZNF207 443.581460031166 641.103199748891 507.375704144286  
572.968592371501 733.358170858378 412.162238678684 541.631969808467  
449.427251674566 740.994425128952 573.394745674984 486.487366153374  
522.651572868385  
ZNF208 46.0023068797812 37.6383530120621 38.2593044488288  
40.2455972565968 42.0709558258414 38.5707420487455 42.9191764437547  
38.0254606843504 40.4220196471124 40.3458948319669 42.6366765186182  
35.6928955245309  
ZNF211 63.6767189846426 128.070047614488 175.909221705119  
94.9785931907153 113.747633871556 89.9789975503195 91.0154871536701  
82.4414994502172 107.610858427836 268.144525192544 156.591349262922  
224.749607192071  
ZNF212 126.404988409795 109.525921548011 101.935321521672  
81.1189042503645 127.908440924429 94.1128427766432 123.868848519181  
158.195749606017 168.247603128156 123.918925337643 146.087016079575  
102.655050997714  
ZNF213 106.027997253013 96.8240908274121 101.020328028769  
81.2269477373795 92.0958762013613 79.1922819549042 125.997088252817  
62.4219686957673 120.34542294172 94.4129246851651 85.5175308034109  
84.7058085717914  
ZNF214 40.8681871019812 39.5050383901884 44.9758339877851  
41.3567204694281 43.4544762830742 42.0574848021044 41.1507980856436  
40.8833572570383 43.2761454096265 46.8954576545929 47.1477056711335  
41.2437378488025  
ZNF215 47.9175508887533 60.3093790894864 56.939860285007  
58.9168466928565 52.2089306840125 42.8598805316863 46.7100796279384  
61.6839343510302 56.9320717885002 49.3000844711116 44.3763859390287  
48.1627097465883  
ZNF217 304.49707512712 252.870708814507 192.763875975315  
149.09682467711 279.448591201269 173.511692216696 263.492132556601  
211.868223638158 363.602775933416 118.115557136662 174.392758289374  
215.869541768982  
ZNF219 181.45962058846 228.747320301945 165.029434090892  
85.1847490113446 210.50519205965 214.100443708064 168.345356470411  
113.767996184128 122.837001441551 285.826380698286 261.260859494893  
199.007437365676  
ZNF22 356.025084823326 203.651890041185 149.950764820034 264.548218296413  
200.318682162912 261.6201598868 320.812668695531 125.290426098227  
260.792628942353 190.076494896441 201.941251308732 256.490125972545  
ZNF221 38.957687788868 38.0226905622357 42.8270038153139  
35.6027791404152 33.5412189543102 37.9951997351435 38.8417151851134  
42.0494116081998 39.3750969348308 42.1622837416589 39.8184668132023  
40.2669497398702

ZNF222 40.4639532172338 42.8542642792862 45.6989664108554  
41.1886975241176 48.0234896130991 46.3715909653832 41.253645578517  
45.7476095696859 43.9450023643394 41.6373771565199 42.4580504587581  
43.2776458914333

ZNF223 302.20349084931 156.719353642505 214.245832611737  
268.419751472464 189.890451486324 138.314834472957 233.501069644324  
569.244038644604 131.929700183999 375.980135105055 424.182335137838  
293.040690378216

ZNF224 65.6556779936059 67.5417980425932 88.8240693967573  
61.2213001749372 59.0965219753805 60.2083550387718 63.3924515518667  
73.6855877240541 64.9725753882126 62.6984594468418 64.6446465846487  
67.8335962843732

ZNF225 55.3153799233744 54.7083331985678 54.842638106265  
47.481302504066 49.9493230064613 45.9266745571724 60.3928833351886  
55.6904617926772 59.5929655877036 53.6429962450784 52.022479439889  
51.4968903591058

ZNF226 55.0078788655089 48.2220547806679 47.2055133646385  
40.646702696033 48.1473938886239 45.9980734733005 53.7423898357583  
59.5830868881343 54.4059109100338 48.2596564318071 46.8712941728147  
49.3654837541353

ZNF227 45.8108990837624 50.0425298550559 41.0356368374708  
49.7350276169552 49.452985143568 51.9421032049606 44.2166118829877  
58.3046521633424 53.6446045619513 51.4454142248566 57.4078217542368  
58.4200819624972

ZNF229 39.266565827316 42.0709558258414 36.769073068743  
39.5050383901884 36.6354013629791 36.6996187567892 37.6036146841933  
40.2382908228517 35.7973685350741 41.3321861371202 42.8263096141654  
34.5633623842083

ZNF23 63.0505463098231 60.5191033120783 53.8724557170772 54.2886483704949  
52.6226745117396 60.8250302910721 47.5963750520409 59.6720198281342  
62.0789181257889 54.4190527512508 56.8760943789568 58.9069025298754

ZNF230 58.1027665533767 52.7493349111555 50.1860191642359  
56.4578213622965 46.8674366115656 55.4694986901287 50.0088611244948  
43.1567024035183 52.4539007817929 46.6598879466655 45.4799270968969  
46.3411353377615

ZNF232 82.7662395247601 55.8678615468603 51.9214790114499  
63.7226299242322 68.3419511055057 57.8005007012205 105.247736284747  
66.0303950772736 56.5094373275922 64.1097859982912 57.4408006697893  
74.2180011215707

ZNF233 39.0620487644635 41.7337506166619 39.2707964550441  
38.3166554965434 34.806104801006 49.9699131196797 45.1017494688414  
49.2019743609873 38.8271346375425 52.6879797806876 43.3085358214154  
43.9541718254769

ZNF234 47.881892094074 67.1926218405833 56.2160476123538  
49.9672547361866 62.5535250577176 59.8102324370568 53.3974326903004  
48.87875862356 56.2441895183416 47.3791873993182 57.5955320223035  
62.4743608775767

ZNF235 56.6951078698291 51.6060290544385 56.2441895183416  
60.9379216295576 39.3667161654772 49.3172204533818 54.8074655158941  
58.2043532960091 58.5561424827901 53.0357938671646 48.6184776976167  
50.379587451669

ZNF236 57.4376528157926 72.7987593815919 57.8111054584154  
58.7338159410728 50.8875036861067 58.4435847520801 73.1654226019863

48.87875862356 64.643220133046 48.7414853386615 61.3149617644002  
57.1441484662045  
ZNF238 43.2239171482126 41.8073910693411 42.1860813954352  
43.9282059368202 40.7369744663513 44.1328851552121 42.8684958525042  
43.5738557773903 42.9020321355927 46.8954576545929 45.5976075407963  
42.4607795638552  
ZNF239 94.696942512529 89.7862835647016 88.9928368134295  
46.8954576545929 64.193536444915 112.984042589704 149.978825406418  
96.0654949568324 59.1223319112238 79.7389069715403 85.3930226794591  
98.2074490157865  
ZNF24 50.9381343674699 64.643220133046 49.3000844711116 60.3481762331447  
45.4751076037511 58.5530199658661 48.8319884367456 44.5029690493211  
57.7865070833351 38.0078357808393 45.390192977585 42.1537476443423  
ZNF248 86.6655289455628 49.1283590719461 44.1452943804044  
54.2886483704949 56.5933259268408 65.9014252111112 77.4046818339539  
53.5271601314404 62.1796792097014 116.67447696188 102.027922691582  
86.8994288019115  
ZNF25 154.730266766226 118.385089099623 148.582198572949 168.492959515167  
84.8751572193902 364.388736869683 100.289042948128 85.9474373829081  
83.105117076029 141.087571926258 161.133104660281 153.081027338185  
ZNF250 91.0346886951891 81.8426140611297 60.7530213660442  
86.3663084195994 66.8733921725051 75.7502062965698 77.7615826856723  
57.9713749600418 75.2337946941103 78.9420136903401 79.3875629814087  
81.8983491901699  
ZNF251 46.3884811643547 46.1131345131683 43.8495248991589  
47.2740099216972 60.6734048807953 48.4166623125005 47.8164193292842  
52.7247447185469 40.5912213523345 53.1993028936883 51.2623287419357  
51.3244198342335  
ZNF253 36.3649677956953 39.6995529770239 42.640829914102  
39.6292788039793 42.269054475455 41.554942319225 36.08956004634  
40.3357777530419 41.7627910693483 39.3698811593364 40.6373400186325  
38.8495095797881  
ZNF254 51.0683600511812 57.1187536733236 48.4890615340603  
40.3850714987723 73.1407519625966 48.1167207436826 71.193768715137  
74.4623288220969 61.4329643389309 54.7006379044056 60.2550788540864  
69.3883443059504  
ZNF256 52.8427643366617 79.8196996067124 59.9690744676539  
59.2778887402357 51.940083408061 61.2387559102636 80.6634117492762  
86.7710020879725 99.8277095030346 83.5069968129733 82.6602736441839  
81.8983491901699  
ZNF257 38.5648843914189 41.554942319225 38.1421709520616  
42.6913548400127 39.859345745831 35.7034203372528 41.706879587091  
41.5464765641928 40.6957787921451 38.8507804383261 44.7926323492519  
39.1553169409075  
ZNF259 124.71462125633 110.746059249478 110.219274023648  
133.673536028938 195.430996540859 160.080366694799 146.534713287435  
212.395308461139 113.655306804539 61.0935621637178 82.3364971911816  
103.179198287911  
ZNF26 114.535461066963 59.9682734755814 94.2275161759277 62.3936376596431  
87.8170592981737 83.2083460752986 98.403191200835 87.5666652975503  
91.2488561751625 132.341766267192 106.20479137406 127.093495914275  
ZNF260 185.227637763623 203.092045210928 150.636903991608  
100.774098314706 159.176229924883 130.953274536639 385.512974999198

177.261319004133 306.14500148663 163.585662735512 128.806903044733  
140.744765497063  
ZNF263 143.6667863386 118.816772641597 144.515737827731  
124.350816245276 116.882934971483 141.043326064913 120.96329303892  
136.190823415283 143.693373312575 201.959257379662 193.290018569713  
177.779514321673  
ZNF264 47.7267190613906 77.268323196327 80.354283778818  
67.8978240198575 65.3933030211114 70.1074782747874 58.6431245059655  
58.0892402609917 62.4776210012906 80.7338782543351 91.5541137821803  
95.8149149211251  
ZNF266 81.537796828766 61.7237308816752 67.6983931011126  
57.5666238219027 63.1852348689647 58.3627863274274 60.612413730593  
82.9995913411894 76.3790849853724 88.6608345370342 80.9024704745445  
73.2842501003097  
ZNF267 41.0608773166058 32.5482839399637 39.991353369336  
39.9697332660833 32.5318884330468 36.1190722948669 36.5352572191451  
36.2539950294089 44.0519245668737 41.1222709786153 39.3667161654772  
34.0382693188794  
ZNF268 45.3451294405285 45.4882438975269 45.8844325913247  
47.1389972732223 43.8917569111856 57.4196234040219 43.8664428040913  
44.4489662507893 43.7630587657205 56.607199625498 54.0798003082752  
60.2001412023436  
ZNF271 85.4713284900688 74.9059650336395 76.0240426902567  
84.0899854321388 51.6869155634183 139.758805241617 71.193768715137  
80.4577725550904 81.8983491901699 93.3897477314201 108.022329297132  
131.645714321903  
ZNF273 44.1294459089314 45.1694246393676 43.0971787292711  
43.4410741327254 44.3166120733789 39.6251842352088 39.2780515621926  
41.6466169548846 46.581796165231 44.3648993568405 40.8225507267584  
42.2577689927563  
ZNF274 88.449333215062 135.080816177012 110.992997780544  
107.478392667404 133.998375673985 112.362505628749 115.195645860902  
66.211494935811 118.155986485411 85.3930226794591 86.9709077763908  
103.423003544792  
ZNF275 73.1931742801095 97.5249420794698 72.7987593815919  
125.333208461509 158.464244518317 98.9560329133205 104.696298671673  
105.308648028552 66.9119713241466 73.4447529556358 84.158736606096  
77.3260618801358  
ZNF276 43.3638918705225 52.2501726671381 48.9944486068347  
55.2214187655851 51.5888395924843 40.1428591998404 43.4544762830742  
44.0390019242862 51.1055541075029 51.3351387089044 51.0492389286271  
54.1941919612524  
ZNF277 178.643141452509 145.419126322238 200.144817111902  
240.6614822416 182.204124363356 201.330854646158 124.965915196815  
208.060345754611 179.886168478179 146.046179302584 149.386774957393  
280.402165030951  
ZNF28 46.3884811643547 50.6774883370457 44.696023817801 43.9744941494111  
41.7929491793697 45.6129956328415 46.9094108823995 44.4031868028216  
58.8201021345225 47.9056710878325 47.0110068985119 52.5752569429057  
ZNF280A 43.5710871617107 33.6902293666089 34.806104801006  
34.5425384901279 51.2525124735102 39.4953494583071 36.4098694708483  
44.293922970134 39.0775870687758 40.3235655331796 37.7384958256497  
42.0424641526302

ZNF280B 40.148780650831 42.4493032770053 43.9450023643394  
41.8778873678551 58.8961770381033 47.0940613507321 40.3302268293707  
47.8947595316832 38.8271346375425 39.2623423164488 42.6366765186182  
35.6427313468066

ZNF280C 55.5751438859404 66.9218519793499 75.1853590860646  
44.9370339275041 91.8935361535002 59.3618843678775 66.3944891131864  
55.1109784383525 71.4864243594056 57.8585041080995 60.1466326805616  
54.8630527326985

ZNF280D 63.2753814090696 61.5824518349507 54.720204938924  
64.0476795495651 74.4379676234684 56.410923639913 63.6930574464881  
111.333692153793 72.9154861179393 61.130286531713 56.8875898013449  
61.3453596561341

ZNF281 125.465429498178 75.9802606133139 103.856444152519  
282.603767561794 87.0414124990547 107.148000219752 98.2843999216669  
135.012695962236 61.4842573582507 69.1623287497421 73.9701365395921  
65.3585701203568

ZNF282 211.685526927495 228.185436206823 193.981651711507  
135.92805172353 212.822978676596 157.109085253328 239.272650332949  
257.80636663638 260.85727391155 188.789206373516 181.912232315225  
116.685453817071

ZNF283 41.7397731376692 41.9894412416874 41.785676764591  
45.0798408927912 38.9496515344837 54.8265655909623 42.9803717121865  
49.7309743973184 49.5539622682049 41.3321861371202 41.5421429082231  
51.4968903591058

ZNF284 41.4508241771315 40.7602938767524 38.8417151851134  
41.6564075217517 41.7929491793697 37.5469247328848 41.5817737564592  
40.4639532172338 39.8048943625718 41.6373771565199 38.5668610487033  
38.9834959368496

ZNF285A 93.7352369697358 69.0503036666628 49.9256753636167  
50.5310598656998 72.1154333023225 83.0554837248934 111.025105784166  
123.022511916727 104.409397223301 90.9570747667407 84.1922656126304  
90.0942781313264

ZNF286A 41.9407041937973 64.408176016319 55.3812135024656  
48.309866878365 39.0564222526273 72.0674952635945 47.7390230243778  
48.5681478665796 52.4539007817929 41.6373771565199 42.2618615571566  
65.7853960266587

ZNF287 41.5421429082231 40.3384318592985 43.6670755115848  
41.5464765641928 37.7576900881741 43.1826328292558 38.0598374201407  
43.0390857698452 39.9444191873552 45.0155543555707 40.8225507267584  
45.8546719310325

ZNF292 36.9060997041453 44.9370339275041 39.8299340037009  
39.853175885492 38.1644569189523 41.6590564937735 42.357910063876  
42.0494116081998 37.9273653326866 41.0057887014368 41.4508241771315  
43.2776458914333

ZNF294 94.5358147295719 106.398825125486 138.100169316776  
89.3342384381684 143.773311381452 115.761674855716 103.447730395424  
69.6473843718254 118.376686726902 78.1683130800805 98.0473811574767  
106.912316023598

ZNF295 88.2427413480277 67.8208976798364 78.3378279021752  
111.877209777434 103.199200862158 114.769498252688 104.158950889938  
117.612004923867 124.56803502087 91.6713614282714 94.3537052300317  
132.3192754634

ZNF296 79.4528447794527 188.734299563005 281.357129823238  
87.2643859655159 157.774096599452 48.260931742163 116.242109750054



161.768763813052 276.149150203786 97.8915084053153 87.129027106167  
67.6983931011126  
ZNF3 50.7975577422986 54.5889822288773 47.6997454073934 44.7546614395383  
54.6183681000147 49.5810174435089 51.8972117537157 50.3554641327118  
54.3210022602418 46.7207377509229 50.5511827666954 49.2863318125899  
ZNF30 49.7827734675743 62.6984594468418 85.5839487225537 49.9014504704021  
52.9433495155796 72.0674952635945 67.6767845246581 64.0476795495651  
90.6191520659197 90.0767501615808 77.0774476767901 72.3297091475814  
ZNF300 50.2203578628217 48.9259041798949 43.4709415392696  
42.0102671859606 54.802736966312 45.2852528185486 49.8281348927244  
60.1796637353976 64.4098139218465 51.2318935933116 51.3861659123096  
46.7182294568603  
ZNF302 108.512469038407 81.3696465421645 77.6653462778309  
86.4898752526885 89.4747568145717 136.843285454801 101.144615206297  
116.900364583878 111.056599389048 165.548537317115 124.350816245276  
99.2100734209486  
ZNF304 46.263826584899 35.1224289925572 41.2365089689635  
37.9875302985336 41.6806984441849 44.6524308640784 44.2166118829877  
37.9837233601316 50.5785738734431 41.5435611403119 45.1432412071268  
42.2577689927563  
ZNF311 40.3478825593224 49.83247261979 57.1226931773006  
42.9358255168086 48.3814421939888 52.8421046802739 45.3597029614942  
46.695848687694 49.641159251878 53.7196173866021 49.5923712603197  
51.6660481331154  
ZNF313 339.418989022736 269.963186760811 264.975481501401  
228.21982974423 334.170764774986 221.743315748689 267.70610731202  
252.134800295199 146.42128243217 279.448591201269 316.185342210304  
293.516547661658  
ZNF317 120.289145237975 92.0002934041687 123.729687262037  
102.786429761295 119.72858253254 82.8218647837178 81.454335582503  
112.613079254002 96.2385885003071 134.285947677624 96.6969760559963  
88.2604063995148  
ZNF318 122.758873982957 67.4018925617901 75.6103053700122  
81.1670374208916 88.4819048592858 74.0995052892511 81.1284422173774  
63.3612993417558 92.0711167984454 84.5411149237799 76.331185787832  
76.4212570031171  
ZNF319 125.209476374199 143.653706909456 178.269900400454  
127.225812893692 84.0996028277101 98.1701560122734 130.211586013657  
114.230358276599 126.571350683611 121.557478857883 119.956819012894  
111.98520046281  
ZNF32 98.3126451737573 89.1382266158262 103.924331701312 78.9958744859596  
77.3260618801358 113.179313022693 96.4033477961156 81.1284422173774  
106.5477041881 92.3388129097482 81.5678694264684 89.6670947876322  
ZNF320 54.8439819445945 71.136135376296 60.0487764689608  
45.4634652319753 46.1513019317765 52.4898616460704 86.3237770387663  
47.6388115824631 113.518333340953 71.0619469948187 91.983638239817  
69.7644070698124  
ZNF321 44.3355304829989 56.1355483199198 59.5444359507702  
44.4912617551615 41.2424637338424 43.3785777889265 51.2318935933116  
41.7877325563821 56.2132652469187 53.2160608018435 61.6702707724448  
52.3896785600751  
ZNF322A 52.6364613846829 44.6918600441328 57.50915811428  
43.2551508830106 55.4919197421746 50.2163892855092 93.6787442149817

87.069143362676 52.6192478923607 50.5252048155459 55.1563703466328  
57.8111054584154  
ZNF322B 37.3875631460917 44.8044806324595 42.9641759692926  
42.4061338151892 39.512606833112 43.0177448037924 45.4164642922183  
41.6466169548846 42.3277879701507 43.0177448037924 36.8730514568925  
40.1235656101329  
ZNF323 57.155499689994 59.6757573886627 51.1347974668251  
46.3919862398545 55.3718910891548 73.9456720099807 76.4889974392545  
77.3999378505514 53.3932110698117 78.9843115855414 65.2295773603116  
54.8630527326985  
ZNF324 98.8719561245756 97.3813557754832 126.017900743748  
112.743602566917 100.305262467668 118.899737794318 111.131550402854  
117.948047796034 166.553853424708 194.207518642389 165.72797054597  
107.799236230743  
ZNF324B 35.9305494063137 42.5269793679335 45.4865173433646  
40.1804147506786 55.0031529299037 47.3791873993182 42.7431359850339  
48.7814131120945 64.2174369755376 44.6918600441328 50.4740079109854  
40.1700117452801  
ZNF326 42.9655396732962 44.5884811528117 40.7152270831203  
40.4893720023062 43.5047914459255 47.0352668572435 51.6731332961917  
42.7881985796277 38.2215591930186 42.1151315286226 43.4709415392696  
43.1131704517186  
ZNF329 140.648209468568 140.559370165331 110.849159638833  
105.580434427464 95.4533981420022 119.647202975116 149.19643034862  
110.983311402531 193.649113002244 181.2179249806 131.942576661072  
188.767243497644  
ZNF330 107.538934056558 141.611097024526 114.657635596229  
131.738693662183 158.25602438933 219.878589678991 104.00520458442  
101.766641669845 138.655669174533 101.954354107731 117.181144429729  
146.287473652123  
ZNF331 57.386779375584 55.6617952786921 48.2415341573501  
91.9185612536409 81.2359429678503 77.518381991736 58.2850603453345  
119.86041265821 50.3783100301688 72.5559426064896 61.8757975011721  
65.1251519077199  
ZNF333 55.0748878261048 53.9275079525238 57.5666238219027  
44.9370339275041 60.7999610195859 57.3171834644877 47.4439407315335  
52.5909491535773 46.4569566520107 59.3299869707613 58.676230030835  
51.7833333848627  
ZNF334 36.8072833828297 52.2832912331043 37.5222959113204  
38.8495095797881 64.7488184936482 45.7700386532539 41.253645578517  
39.0170123539232 52.0228313532986 69.5853093594169 59.1443775199516  
76.889690218685  
ZNF335 44.9896851005259 46.9919960628953 51.1347974668251  
50.378948785456 53.0419743379342 49.1013967533186 48.8319884367456  
46.3685439301234 51.3511088648386 46.0119912782855 48.4717951775049  
46.3411353377615  
ZNF337 186.522518256229 151.641746442323 184.048982286364  
132.205423909251 223.709679474743 154.730266766226 214.51120218554  
127.008218054726 159.22638189198 417.4609354305 251.4927207704  
191.668846959973  
ZNF33A 62.5528124447176 61.9753438182501 63.0670482657086  
60.620259884953 49.0145368354835 65.564930068976 64.0985088513857  
62.8362064074814 67.9753615619786 71.7464249053513 64.2174369755376  
69.4820178305563

ZNF33B 149.769671874782 175.632783805966 193.380035526465  
129.951091959262 109.922909644299 185.079035617027 140.744765497063  
150.262748333939 140.648209468568 194.985223342082 191.330112738223  
209.438270055157  
ZNF34 116.852483297949 106.058751335133 110.540953771795 96.5813769696577  
72.6675345946258 117.250114037308 64.8367546135053 67.2714646016644  
104.696298671673 126.546330358591 104.076098789396 111.760213205992  
ZNF341 88.0979122006842 89.9340376539354 132.84476910529  
101.708164294697 100.90948905426 68.0501900087917 125.752132815786  
253.764071470001 104.516141143655 119.979854891563 129.810477623628  
94.3229189690855  
ZNF343 45.3872406432794 40.4359177791566 45.989212296035  
38.0958223740111 48.2748123114598 45.0882356578404 54.339958888486  
40.1474543172332 42.4540072551568 35.7202909649682 38.5668610487033  
47.5025821041537  
ZNF345 46.5759625882541 53.5090984247271 47.0474493061198  
43.9282059368202 46.7058093820839 48.5136862664526 49.9085372049438  
41.1575777497576 45.0017158586743 41.6373771565199 45.6706505553383  
46.917149434588  
ZNF346 50.0466349801009 46.8954576545929 50.3950981988762  
53.2046867327331 57.2960245538881 48.7781962164988 44.6032218589199  
50.857522488428 40.2274522635576 62.8201270538435 50.9815930710768  
49.3087627580849  
ZNF347 41.3387790895716 48.9259041798949 50.6987358483181  
48.1662933382789 43.844855336215 43.8582747295766 51.4349390827895  
47.0940613507321 49.5539622682049 49.1928206164702 47.299647867533  
53.3059058105836  
ZNF35 84.3850767822327 117.934830767297 90.7037473522607 89.7554896946341  
148.42234459694 105.945216149549 115.496195377983 146.719419166639  
122.0305509548 100.499763255098 99.1952492360239 101.888001006345  
ZNF350 65.5495324730507 61.4800543360853 61.356483470053  
73.7124988616836 56.4685270445642 78.6402083787251 80.4479092568961  
55.8087097725119 53.3094843669564 72.1090339831747 53.0798381965427  
79.2525964926483  
ZNF354A 40.7609952437622 43.7644428186265 43.7630587657205  
44.6905691366696 41.7929491793697 52.1024135605001 37.0564573649223  
39.7509165247419 42.4540072551568 47.2299678280724 50.3221380889396  
49.2064066614865  
ZNF354B 42.7150227340364 36.9994058279362 36.9795961564828  
36.7892997857376 45.6895223823001 42.9695585740813 37.830876898596  
42.6450179841129 38.3418933808844 36.6893251782922 35.5179217192467  
40.6614700944853  
ZNF354C 36.4564050256915 42.9358255168086 38.8417151851134  
37.29566077996 37.4978862564271 37.6455751461448 37.2892641289258  
38.8159908342801 37.3600014814388 37.920964499903 39.8577530602176  
37.7526485343328  
ZNF358 265.790391813663 215.175765091556 181.738902391483  
132.369828264246 360.047596829923 412.421643885499 268.144525192544  
195.376772135023 234.113622230498 357.182869779274 416.052744271365  
240.975885654236  
ZNF362 255.559793355361 266.381531918483 317.560970617018  
166.983092667334 233.72882333861 304.977139992391 272.405201392009  
280.239058266018 264.855020003755 416.052744271365 364.337811621248  
206.703865774092

ZNF364 233.692490031492 213.380798420955 241.706783147271  
286.456276735451 238.338646661062 296.271895016431 243.27954361539  
423.804472820231 183.028254350275 206.190699642477 221.325534445978  
200.384444538476

ZNF365 56.7535625723802 46.3635803515159 38.4043916290561  
45.6706505553383 39.4693871570028 39.7697110924474 38.7834015512793  
41.8767957887205 89.737418965763 40.9647597231175 41.2598458726002  
40.6216891610774

ZNF366 43.0930293831497 46.6996902348633 43.0016969050339  
42.357910063876 35.9894133432376 38.2293008890613 35.1307934330047  
34.064698871541 34.8552366193358 38.6454098044474 46.4205654140754  
36.7762265039864

ZNF367 42.9104454767916 44.7829632472754 47.4740726032707  
41.8778873678551 49.7235523248653 41.2567470068038 41.3594868055879  
41.0381860307445 39.2809305246091 35.4990901121893 37.9946685306274  
46.4499258373233

ZNF37A 43.9309845324767 42.7303139017786 47.0547008310258  
41.3027031037343 38.9496515344837 45.6782637989541 42.3360569471619  
42.7881985796277 43.0930293831497 39.9479806809296 38.6348619337445  
42.6758568421347

ZNF382 36.7356360093603 33.5924201549249 35.5220586859301  
39.5050383901884 34.5301949364147 32.6368705146258 39.2533668167483  
44.5029690493211 38.1169703906207 41.0057887014368 36.43924066428  
33.3192849177028

ZNF383 47.3791873993182 49.4982025424177 46.4569566520107  
53.593974682612 43.2484996523549 44.8872784170036 50.3519150282938  
52.3068458655445 52.7512110769042 64.6446465846487 54.9765783642973  
52.8455400026194

ZNF384 59.1774824918359 55.9269493191353 53.5698357689852  
49.1786207920603 62.046151104685 53.3995745404636 69.9214859673839  
59.9682734755814 72.2120805585702 83.1392079778036 72.8167175634793  
59.4171001203919

ZNF385A 83.5646728968172 184.340249262704 154.911548311992  
147.285007921741 93.2630594602634 84.4433277732938 96.1825551158198  
88.1861828863404 280.870472307893 273.764998628636 223.501516374076  
155.6723334711

ZNF385C 43.844855336215 35.5310164682026 37.0642268327439  
41.3027031037343 40.9950639693255 44.1737502492846 40.6750540874299  
39.2672712041774 38.1169703906207 41.4397539024976 41.8168470823451  
39.5418280570561

ZNF385D 45.2875173643252 48.109747794187 53.4088637045445  
99.5958921252583 41.5668884168669 86.7776945455037 39.1539892144371  
54.5125550937898 47.27543600687 53.3059058105836 63.6057995724852  
65.7853960266587

ZNF391 40.6559419616644 45.7317208802318 39.7411455670172  
31.1401844809132 41.5668884168669 40.8634043028528 37.830876898596  
43.2551508830106 42.1594905198929 39.8873706855774 40.2649309204478  
41.5536168238478

ZNF394 983.972164685474 613.740813446728 642.946369683508  
775.515071756239 404.674869177442 364.388736869683 761.922486104216  
1275.78715071615 556.417356025042 1487.80306986156 1526.94101719128  
1064.35745220225

ZNF395 257.993462737264 215.831300220615 270.756849919679  
193.094756585577 148.544012961815 215.452117252205 452.797096652556

173.800190134221 325.990132666873 387.867128019374 327.455030020799  
360.523229691604  
ZNF396 49.6241203903354 42.4493032770053 47.9691830342777  
43.6726153508978 43.9994592139885 43.0860383229288 46.1634822993009  
43.8694505312625 47.7086093893038 45.3894119568143 45.8669209716694  
44.4475838947656  
ZNF397 48.9906383294199 49.7363778831003 55.3812135024656  
53.2046867327331 45.3675390992851 55.1037284831588 39.6535880152834  
51.0724630072723 57.4777075615651 53.8260140375214 52.6960621424156  
63.9371474698484  
ZNF398 55.6683196219708 54.9821263631962 51.6660481331154  
62.2878942799819 53.2090401010575 52.3187919317561 72.8653205184014  
94.5186910848217 75.1782851135559 61.7053174323665 63.7598547294225  
60.8662233098324  
ZNF404 47.6397712007919 42.6939394537076 43.6670755115848  
41.4273122914951 46.6397391251762 51.8103411703261 44.3440839686558  
50.5070012045444 54.2825877218965 49.9493230064613 47.299647867533  
57.445796273665  
ZNF407 58.1868359012515 72.4025631353475 65.7924490713262  
109.503117647487 55.8859157806662 78.4084516725573 78.5276518966943  
54.1261903591606 73.1486761830176 82.7853677822046 87.0679709116604  
65.3121096212536  
ZNF408 68.0700069295224 72.0792554308917 83.6438735616921  
58.9168466928565 58.5450868286167 67.2649356062263 76.1869593072029  
57.3286965007828 75.0704619826557 85.5439309325541 78.963270461629  
72.2211523775459  
ZNF409 41.7397731376692 39.2907645923217 43.5710871617107  
39.066284740632 39.9697332660833 33.7818132446042 42.629412460409  
38.8495095797881 37.7384958256497 41.0057887014368 42.8263096141654  
44.5432192783161  
ZNF41 40.5289532121417 41.1262212547458 42.59352468383 39.5050383901884  
37.7576900881741 38.0698669928229 39.7066891275048 40.5585676679482  
43.331653186429 41.8613406887824 43.0628560222052 45.2189250687483  
ZNF410 195.813431189188 85.0017995689256 154.633672616367  
156.276838862671 112.830467116678 177.935411895372 119.609614885616  
192.318724749487 168.492959515167 159.359051158123 151.575914903116  
185.165420581989  
ZNF414 54.0170817319522 58.3627863274274 53.0630927250439  
43.074472921841 57.5040500497076 49.7458652239071 62.0404348860702  
47.2009420656854 53.7442594289333 60.6266092582071 68.8058577447202  
54.0374522273907  
ZNF415 60.9710783023013 88.8039637390786 76.0240426902567  
59.0965219753805 48.5000946421718 101.909225305064 92.4534854832186  
61.9787117490846 99.7668527666705 120.381190859636 102.77259665192  
124.791747507205  
ZNF416 60.2547250212462 62.9904770954043 60.0856496605043  
44.9370339275041 49.7235523248653 53.4466111440611 63.0119737420787  
52.5909491535773 74.0614295574729 65.0928075335306 63.4323398447015  
62.6868461044048  
ZNF417 54.931538325692 61.2108152457954 67.235655687817  
44.550322123994 65.6003544901554 54.2503023961401 64.232967574797  
56.5914743235484 57.8772482723463 67.2437599548936 70.4204944097269  
57.0524725494273

ZNF418 46.9939712192224 48.1627097465883 42.4580504587581  
42.357910063876 47.4548471240051 56.4819802857598 64.3669451425581  
45.642304356051 40.5912213523345 64.8549209064366 46.972521499515  
54.5921287593554

ZNF419 59.1311136551108 77.4046818339539 55.7764940944098  
42.2496337895968 68.6627996695828 54.7083331985678 56.6537562775715  
76.8393340617473 74.7934385405346 62.6984594468418 67.9599395822006  
91.3112603277315

ZNF420 43.0001432913058 38.6414316877471 38.9790184198145  
35.7674462337723 46.8674366115656 31.1150868775826 47.5963750520409  
33.5578650644246 45.2897806651929 42.3606390470387 46.6442692119997  
41.0657892043496

ZNF423 52.8843091010101 72.0112676564347 64.6446465846487  
47.9915414951747 52.8190882379316 112.519759295176 66.4258159334241  
66.1288889125299 58.6431245059655 77.3367966395554 64.7963220317334  
69.9144520559912

ZNF425 43.844855336215 51.3084273211359 43.9450023643394  
38.2041059863839 62.046151104685 49.1013967533186 52.4111687156893  
48.0582855095143 57.1016072897358 46.8954576545929 53.0798381965427  
51.0647893605839

ZNF426 136.657213529097 111.522812019895 108.512469038407  
81.6780581904253 105.446338599737 139.445008123768 91.2330127140591  
154.370850473737 132.294940663192 138.895316905243 138.859992681388  
142.812241748319

ZNF428 1127.96214301065 552.321665894163 437.542517888395  
288.597205372736 1078.86166154061 779.996851709716 876.959744461441  
1027.59400018637 841.316771679857 566.77872642437 747.577738135496  
739.541009338849

ZNF429 38.2083710281545 50.543526404059 47.3861758958576  
40.0698728584484 47.6884372645373 42.4580504587581 43.6753843488695  
49.7309743973184 60.6266092582071 38.2069499294002 48.8088340735921  
47.3992733452821

ZNF43 40.0557788909923 39.5050383901884 37.9482157381008 40.7481155008596  
35.6434124419782 37.1894304543751 45.7452456977857 41.3506832276112  
38.9006788676407 41.1222709786153 40.0766543123257 41.3948836161924

ZNF430 1511.33844030783 818.290793784784 1037.51323185348  
1117.26060212107 744.762787024945 604.951648398924 1261.91478863258  
2196.59044510709 691.132727131746 1891.37245670852 1634.61795848352  
1296.28036613191

ZNF431 60.8357760968871 61.3428092991286 48.1997158668729  
54.8412943008635 63.0383605052305 43.5752393599169 51.4349390827895  
61.3864512710242 68.0796261751272 64.9959712888709 57.2979215534929  
56.4578213622965

ZNF432 57.2960245538881 64.643220133046 47.2055133646385  
45.7397504535169 43.004943518025 50.7516773099639 56.2181240696479  
56.9299697426319 49.2879849674517 58.5087296620514 53.6895401581575  
48.6037684272115

ZNF433 65.3531590366085 69.8983723094667 65.3531590366085  
54.1240583139871 57.2960245538881 59.1570467228834 68.7753456118815  
95.6731932757489 77.3367966395554 90.0767501615808 80.7198077526005  
73.6512983066046

ZNF434 74.0913177754682 92.2946243272848 104.250582652805  
72.89602312859 62.1836961153924 110.935994444429 62.801431502597

58.3046521633424 99.6340486428397 80.8593396441328 72.909783842776  
110.860844149372  
ZNF436 45.9090659324223 52.5380506348717 49.0706836094282  
39.7938220956242 64.8179026986479 57.8497388356952 59.5205055437765  
60.4837400912239 70.9179240997848 62.58750768974 53.1917140116857  
55.1804535845496  
ZNF438 73.5534417023453 61.1022920882065 52.6275131390249  
161.7095047889 55.0031529299037 117.520762118299 67.0455170947389  
59.7744650739434 64.5347406608537 86.7076796107636 80.0651801266824  
79.3875629814087  
ZNF439 61.4884606677516 124.605379715077 72.2797007105795  
77.3864518736634 80.8238125943267 64.2174369755376 101.065203693106  
304.577891085373 80.8728961146267 166.847053797281 104.873452487222  
99.3344676796884  
ZNF44 38.2083710281545 40.0527893189096 35.7105247506212 39.1706564265495  
37.2567512265363 38.7340969861754 38.941855825269 41.5464765641928  
43.6670755115848 44.2580151149956 40.2649309204478 43.6753843488695  
ZNF440 42.0532901689036 36.0366673493555 42.5406888281114  
36.9912468186322 41.1868052124344 32.771863438151 45.3597029614942  
39.9576138799997 43.1805016690297 42.6793753550854 40.1742127891824  
41.9430737035925  
ZNF441 40.9558083259517 43.1805016690297 34.2890785915814  
42.6913548400127 39.5595233162192 37.9951997351435 34.806104801006  
38.8495095797881 35.6139301508335 45.3530683538086 42.170702295259  
38.5279745308203  
ZNF442 54.1745577382276 48.3077814647455 47.7737810047679  
55.0604256312495 45.2556760873335 66.4015820814547 50.3519150282938  
55.421880601441 53.3094843669564 60.399253022569 54.8532558909227  
53.2046867327331  
ZNF443 84.6279355865799 76.826527950236 69.11736279512  
58.1798515131249 79.2314952301621 62.2162877546933 88.9430141071732  
99.9896394343368 85.33395043174 82.6602736441839 72.4325984501758  
86.1741504863717  
ZNF444 62.1448806673973 64.9959712888709 78.7103847663605  
49.9014504704021 71.2787833369055 55.540888910486 74.1353964055485  
48.7814131120945 95.4942268742467 110.599131324937 107.391994714261  
84.9280683258012  
ZNF445 38.2083710281545 40.9731067463382 37.4642807402741  
42.4580504587581 43.1252272136667 41.8613406887824 42.1607322031054  
43.4544762830742 43.9450023643394 38.8507804383261 42.8263096141654  
43.3744503319109  
ZNF446 68.4352167527791 141.255712367708 139.883681090758  
78.7450149191851 110.09868737254 98.2843999216669 114.396745444915  
82.0925058822176 137.302487233881 135.706144105357 121.552188287725  
105.828093778276  
ZNF449 48.2910530887214 47.1332119496722 41.785676764591  
48.4916117779992 40.9950639693255 43.1826328292558 54.1707158323527  
34.3865306339645 44.7058233759912 42.0621425894624 46.0905079010237  
46.0633179231318  
ZNF45 55.5276281380084 70.1831787109201 60.9621846036092 69.8314582428552  
65.0605897122361 63.5738862549306 66.6894494536346 59.0262390168156  
79.856662992182 62.58750768974 68.8058577447202 74.4365426051588  
ZNF451 111.438294720953 85.3227908896318 76.3583555666815  
85.2805684630976 73.4208306290635 89.0495215957248 88.7029126110977

112.211717641877 65.7924490713262 95.2490714726663 113.26670675749  
102.106719342949  
ZNF452 43.1805016690297 42.5624638829203 41.3708420203838  
43.1847628331565 40.4321207743917 40.7616966228404 41.7614975630362  
39.8016018354453 42.6762317063737 41.9097689475185 45.310660704531  
40.1700117452801  
ZNF454 48.1952521496489 39.2907645923217 42.3536549114165  
41.6564075217517 35.0181575202066 47.2009420656854 35.9058393060637  
40.047314525032 44.1519466943185 48.1392888470269 51.9302027391447  
62.9904770954043  
ZNF460 47.8249696958403 43.0227387991135 48.1682125052975  
53.9517841438975 43.8835874380262 45.1411314881341 44.7255207589606  
40.5640952422779 52.5307002738469 42.8414096678708 41.7627910693483  
44.696023817801  
ZNF461 34.2180669723984 40.4359177791566 42.157627240486  
37.4223289687135 43.1252272136667 38.3418933808844 37.9430145836712  
39.0620487644635 38.5252456306656 37.8217989841918 40.0766543123257  
43.3744503319109  
ZNF462 83.1614238528477 75.5775406974686 87.3634135323569  
115.913030448537 115.408418935236 222.40005420611 262.779883562966  
407.818713538416 112.131738588405 293.086409068972 414.293172794592  
202.081933301612  
ZNF467 170.850089909832 85.1207977556852 97.3066473777771  
203.353724675525 88.9038123445083 105.621640443267 76.1869593072029  
78.5375244257332 159.618353114269 60.7495043977707 78.5325880060762  
53.840976437122  
ZNF468 44.1294459089314 55.1766423847208 51.267956161763  
52.5307002738469 53.1884505015411 44.2607789091176 50.6774883370457  
45.9604707098953 46.2027193115397 43.781101409552 50.3876754565799  
49.6629259325705  
ZNF469 51.8781065691038 42.5269793679335 37.3404647796601  
41.6045220683604 37.10170285405 40.2945586900975 37.7555770011351  
38.5457716679071 39.5806465938526 37.7315666632629 37.9553529562144  
36.3454320848591  
ZNF470 51.7607563002005 56.8373628733077 49.3780606970538  
53.0284011078097 55.6069214673486 48.6621527194963 55.2088411137193  
56.1404433602127 44.8003345643334 56.4553747079294 55.1804535845496  
56.7711602236706  
ZNF471 50.1912176441302 52.4129003341939 49.5424425850549  
51.1313686723929 45.0693869004277 76.2506268869958 66.979105340228  
50.8160430472218 44.4395580493118 62.1718158914638 61.227809931332  
72.1687283197901  
ZNF473 75.6471706262645 72.6162848018047 60.5948704279864  
71.9062462001972 92.6290175610859 65.9273663561152 81.454335582503  
65.5349012839562 93.2133061608764 66.8544766980562 64.7219521869942  
54.4753345912615  
ZNF474 41.0608773166058 39.5573415356949 45.063792968927  
41.4273122914951 40.5710637884029 42.357910063876 39.3585350448719  
45.3389970694851 45.0017158586743 42.4393920571519 42.6776449468246  
45.8546719310325  
ZNF479 41.0608773166058 42.1607322031054 50.6987358483181  
41.6564075217517 39.1650142708257 41.8613406887824 33.6696565339534  
39.9576138799997 37.0126425326534 36.9102644736882 43.0971787292711  
39.2469742642337



ZNF480 66.5500089527674 74.0614295574729 59.7483827511172  
73.7124988616836 53.5594683028749 65.813547096222 90.4957279507369  
80.2680308979464 80.7409247380392 90.4160198134865 83.1184264089873  
74.0913177754682

ZNF483 112.977333058979 74.5282276561826 86.7823828209946  
133.453860783605 67.0577715520007 65.524821699432 86.0230765383602  
151.047739254277 77.7615826856723 139.191263237202 169.479834662751  
124.078147850905

ZNF484 66.7759319948677 63.3667304749164 63.6334154351075  
73.1447139654971 58.037539503209 63.4610447573417 69.6301237585571  
67.6767845246581 59.5093038629766 83.0700092537618 79.1922819549042  
80.6200293361016

ZNF485 40.7022020432945 44.1533327883807 43.0602678767669  
44.9370339275041 40.3021896270845 40.244271403831 45.6706505553383  
47.834436078111 46.1101825640108 42.785429206422 47.7902961065936  
52.5420632648124

ZNF486 4200.38495514552 2018.28984520892 2257.78227736778  
2588.47871581066 1285.49870339222 1169.14891282789 2424.0414102425  
5971.45293864208 1564.55598228713 4259.50675863393 4381.51418239047  
3399.75820494572

ZNF490 45.5758521267508 39.5050383901884 44.6032218589199  
44.0451487108213 49.0828761839116 42.8598805316863 41.8315602975157  
40.2382908228517 44.0519245668737 41.5435611403119 45.7328341667151  
45.6692241948108

ZNF491 46.263826584899 43.5627649099623 41.6079958749402  
40.7481155008596 49.8865955311391 45.7300501624017 42.357910063876  
51.7538628098347 38.3418933808844 46.7182294568603 48.0921802028926  
43.7672102682067

ZNF492 46.7293238583888 43.5873188565519 43.401782064778  
47.9915414951747 44.7829632472754 42.5193208629123 41.1507980856436  
44.6107027295193 44.8997235283254 44.3648993568405 45.310660704531  
45.1735152121056

ZNF493 50.6473771879221 48.1627097465883 47.965492554043  
46.1148643659988 42.2331334096358 46.4308160577459 48.2748123114598  
55.6904617926772 52.6935201842572 64.6970918899831 61.5080959417997  
53.9918882088235

ZNF496 35.6111578834671 37.10170285405 36.9795961564828  
36.5393857306744 40.3452320167286 37.1317006162938 35.0305278582179  
39.9576138799997 37.0126425326534 44.1379638573455 37.9946685306274  
36.9976231206067

ZNF497 39.9697332660833 42.9358255168086 41.6977706798234  
43.5627649099623 41.8806343997257 39.4953494583071 39.4600924554505  
36.5393857306744 43.5669306063196 37.8217989841918 38.2795150354677  
41.6550823405646

ZNF498 37.8386378737561 39.7835513496873 31.5151915411476  
38.5252456306656 36.2048942610546 34.9849896310235 38.5066108855005  
36.43924066428 33.0463640202858 41.9666541498638 40.3452320167286  
36.3454320848591

ZNF500 81.1350396749303 85.6038071277319 97.4515987591398  
66.5921967967793 76.301438841111 54.1440452292081 62.5506324864207  
59.8760452220989 79.0276852011359 110.729504563799 89.5887648181505  
84.1030588938732

ZNF501 42.3433931248155 45.7979032939211 42.640829914102  
41.4273122914951 40.7779767565889 44.8872784170036 42.2577689927563

38.8495095797881 43.4656637536244 45.4614234442527 43.3085358214154  
40.2669497398702  
ZNF502 51.5033727579864 61.6219790276408 68.9522412475296  
45.0798408927912 74.0149013521008 72.4651758215622 74.9059650336395  
37.33030683349 81.8104679118753 74.3187437598836 68.0960719007162  
62.3470274683312  
ZNF503 192.732356915298 320.038347979923 221.383645621978  
96.0770202999531 133.151333210366 187.601223003233 254.239142284878  
87.069143362676 209.794541970107 149.27230040094 192.356440003154  
96.2739664178142  
ZNF507 44.3355304829989 54.2924642952939 44.6032218589199  
37.651298468202 44.5668141895992 42.8598805316863 55.2088411137193  
39.0620487644635 36.3649677956953 47.611018474151 43.5710871617107  
41.2437378488025  
ZNF509 78.3851687801705 76.6346767983285 75.0377156190383  
80.0042268333735 56.5933259268408 72.9154861179393 73.4820932957859  
61.9787117490846 76.8864157610323 81.915829566737 94.6300022444815  
77.3999378505514  
ZNF510 55.1306642449627 49.4067286971348 44.2405728317107  
46.7577982595088 52.2089306840125 68.3234331335073 45.1017494688414  
53.2046867327331 54.5952754712007 55.6069214673486 60.8662233098324  
52.2832912331043  
ZNF511 184.859183550225 201.027801320306 164.097531361519  
244.167954467328 230.702348443021 265.414737742846 340.20879802231  
133.981674663494 221.598637828404 205.449627031002 212.353676518748  
195.221917652149  
ZNF512 323.453481668415 275.811139268285 205.605413799808  
182.721628571674 366.915943380617 355.7118155732 222.696947669812  
349.480794966845 184.218705402964 338.355170063433 277.993522959259  
250.993396750789  
ZNF512B 57.934905173625 93.748984888348 104.135574209392  
56.9299697426319 132.684895918889 62.3497263884167 88.4695322145032  
62.8885806455128 74.6955454743937 75.3333024462557 68.0414563597154  
52.0359304386476  
ZNF513 87.069143362676 79.4710406831985 84.4443931765378  
67.474556589181 69.493532577364 59.5979861826984 76.3583555666815  
91.1834104205004 84.2299424587647 69.9928775398776 83.1874704625702  
71.0340758556049  
ZNF514 76.034392064609 105.647054678056 126.115065200084  
64.1442136854628 107.094663242259 80.3266484520306 81.6458112867541  
100.756165194192 64.9418945936106 121.135772395548 162.30238363798  
126.253578620746  
ZNF516 48.9906383294199 47.765848710116 47.0055981216687  
47.3574589211166 46.9906120932727 50.3245489035833 46.8613212048981  
43.844855336215 45.9227107476843 53.0357938671646 50.0808824383821  
50.379587451669  
ZNF517 55.3760274891743 53.8333108984467 48.0191002461099  
46.6849259108754 44.5092684716474 47.9503724044453 44.3440839686558  
48.9393675671956 53.6837370963602 59.4674205670657 50.5381435455868  
49.5539622682049  
ZNF518A 86.3054012048636 125.90746674767 110.540953771795  
92.2530518251152 118.044483475719 95.8075612515186 126.500059295217  
113.064858029749 96.5175130622216 94.233414682323 98.7446830481164  
96.2739664178142

ZNF518B 187.422036538629 208.529062113623 82.2266112813039  
131.955454394903 211.693380728047 161.526970033915 70.0567634568557  
131.929700183999 338.164006403 136.629336440719 109.594402843796  
118.288549974348

ZNF519 45.9356781508849 46.8633601764927 48.7757754239447  
39.7938220956242 48.7738999860475 65.3096524773304 45.5581356216957  
48.4670130605028 52.1283726483563 45.731442524732 43.6262742635807  
47.0130468198828

ZNF521 60.3381680822012 43.683792219729 45.063792968927  
57.0629653735694 41.9842695818285 48.8744644207821 46.5650556481721  
49.9332280449549 39.0775870687758 49.8393069675192 54.1963147679251  
47.6938628797168

ZNF524 132.604567913122 131.537639104397 139.814194128548  
130.908206625954 193.60925192949 155.01005229951 186.372887375058  
167.872060678879 220.896780388946 236.374695859748 188.196662406725  
146.997252473598

ZNF525 54.4384603094793 59.8400088701028 59.4431489877328  
63.0153175111747 55.6069214673486 49.9699131196797 80.0733119200914  
58.9081750508316 65.7321440516177 58.8022152133979 60.8201366212589  
65.1251519077199

ZNF526 51.8781065691038 50.2163892855092 49.9256753636167  
47.2009420656854 59.5844022026141 46.3715909653832 47.4439407315335  
46.0633179231318 46.8873421271259 55.5206840401643 53.9517841438975  
53.5643281930979

ZNF527 36.5393857306744 43.9421822132391 44.6032218589199  
38.5252456306656 47.3172462673426 43.0860383229288 53.8687221233237  
44.5029690493211 44.8997235283254 44.7958122466628 42.6366765186182  
52.5752569429057

ZNF528 46.8954576545929 42.3550738181144 44.6032218589199  
46.3919862398545 41.7929491793697 41.1090481599939 42.4939802311136  
42.8482181313226 41.2870505273664 45.2556760873335 44.6834648302383  
44.0451487108213

ZNF529 105.45765455249 122.203872796773 125.52123746909  
108.025082988807 132.684895918889 146.483908799607 175.820979889343  
203.759116151774 156.382146982116 180.80065212092 159.463273263774  
114.269266728885

ZNF530 44.3355304829989 45.0115870036541 44.0451487108213  
40.0698728584484 43.844855336215 41.0582900711341 42.9803717121865  
48.87875862356 48.7358147030082 41.7405682794166 40.723990462047  
49.9692385479389

ZNF532 125.997088252817 79.8196996067124 67.3469281984384  
88.7703546775492 74.0735632658567 116.066916521887 75.7342400123505  
61.8665316900291 68.75304552302 121.806692423791 98.5609311953771  
84.4349803529132

ZNF533 42.6036491382658 39.0102066700839 37.8386378737561  
37.0732977341185 37.8679241954337 74.3729155936862 33.2425023465738  
40.047314525032 37.0126425326534 71.2963721541702 58.4816190076338  
46.2625470410195

ZNF536 42.5193208629123 43.3458769998118 43.8153459269057  
41.1886975241176 43.7517118200398 49.7458652239071 42.4493032770053  
43.0390857698452 44.5303781239209 48.0211752672327 49.9338905397767  
47.3661873039785

ZNF540 46.0920218698606 38.5252456306656 47.5673419710251  
45.0798408927912 36.5393857306744 51.702461863489 36.634024014558

38.5457716679071 43.4656637536244 93.5511826850067 65.8220821345163  
57.6075177910677  
ZNF541 43.1805016690297 46.6314009405034 52.8041782638549  
41.0726336841311 47.8075998240396 46.1513019317765 40.0052661202207  
53.3094843669564 39.9444191873552 51.9547984751408 49.3901004211918  
48.8670821164567  
ZNF542 41.2424637338424 41.3610369241157 40.4882741869718  
51.0175677516029 38.4540849632254 44.7804080899431 37.4772922422734  
41.2551966132486 43.8482802038826 40.2112371512838 46.8954576545929  
41.5536168238478  
ZNF543 46.9939712192224 56.2305155589239 57.2960245538881  
52.5307002738469 47.9128504683618 54.5952754712007 51.9421032049606  
52.8622615027833 68.1674425673171 61.8529316708431 58.8961770381033  
57.290967307936  
ZNF544 105.45765455249 174.088328509793 135.706144105357  
109.144663527001 121.441763452598 88.2201332015312 171.485221601137  
120.392561825049 235.962209790392 178.323615832679 162.447872391923  
140.128033028434  
ZNF546 40.4639532172338 37.7384958256497 34.5718473203083  
40.5484717678957 42.1650127805175 42.6575535390785 41.3594868055879  
41.0381860307445 36.7267557061938 39.6719190054379 35.860430241131  
39.9519547348106  
ZNF547 42.3433931248155 42.8542642792862 39.991353369336  
33.3231576795423 36.9702228618069 37.0180934800573 36.08956004634  
38.745552403895 41.863927676552 46.441301934328 36.3390947880186  
42.8864415494484  
ZNF548 80.4479092568961 102.38706554984 76.5699943825825  
74.7732045170597 86.6854406823303 94.8884063433735 79.1432909353319  
64.120219344545 94.1575209300592 97.0254711947754 98.3322659713024  
85.6038071277319  
ZNF549 3114.05035137552 2138.23653387331 2191.09005731751  
2215.01815680371 1566.12726152736 1354.50256889331 2663.19221471348  
4299.4451139256 1670.01014610464 3941.3269626913 4148.07163380544  
3088.44063817936  
ZNF550 47.4076235350059 54.817411913272 55.5005760719069  
48.309866878365 56.9133235865341 45.7700386532539 49.1067959632109  
44.2159020605784 54.7033747046992 57.9141744971757 53.0419743379342  
59.3406363431414  
ZNF551 46.3390850717989 50.2696827764943 44.2405728317107  
37.7469621225553 41.7929491793697 43.2805590023412 50.6774883370457  
49.2019743609873 46.6944238390932 53.9412154719864 51.2318935933116  
50.1579724208315  
ZNF552 40.8681871019812 52.9603588177082 64.5232087947596  
41.7614975630362 39.6535880152834 41.0582900711341 54.1707158323527  
52.1788489555942 58.3564461855595 50.5252048155459 54.7061116419212  
54.9919060580109  
ZNF553 36.3649677956953 41.159706131351 42.0621425894624  
38.5252456306656 38.1644569189523 44.0804700754786 38.0598374201407  
46.695848687694 41.074824727477 33.5412189543102 43.9450023643394  
42.57175366709  
ZNF554 41.0608773166058 43.1805016690297 36.4564050256915  
41.6564075217517 41.467005949568 39.3841861812262 41.706879587091  
40.931294690669 38.0213051227859 41.8613406887824 36.5359455830388  
37.7526485343328

ZNF555 47.2862299990938 41.8073910693411 30.7315474127249  
43.6726153508978 45.9104478407175 37.3799542961839 40.1235656101329  
42.2577689927563 47.0804681460898 42.785429206422 47.1477056711335  
40.8681871019812

ZNF556 44.0328992213727 41.4508241771315 31.6419446793642  
36.5393857306744 57.2960245538881 40.040778349137 35.1307934330047  
40.7311497914871 41.1742244762318 37.7315666632629 41.0050831223107  
39.2469742642337

ZNF557 76.1969626204894 62.9313387640547 62.6885730386156  
70.506090074243 54.0126916508417 50.6915708372926 69.6301237585571  
135.604088792552 59.6246428440926 94.0140258999054 85.6582555450821  
77.9085946827079

ZNF558 88.5140510969737 72.4325984501758 102.734042853587  
61.8997157694697 87.3957386451235 63.8740412329753 65.2361525412756  
87.9468208580228 71.787754116845 98.2843999216669 76.331185787832  
93.2319962015465

ZNF559 96.3232257371077 97.5849495690144 104.704892803169  
65.7321440516177 50.5110359971301 79.8026267036553 65.8986841086198  
83.2873728545705 84.158736606096 158.478919789334 112.368910939752  
113.491158368594

ZNF560 50.2203578628217 44.0409178714232 36.4564050256915  
40.646702696033 39.0564222526273 39.132725377815 41.0381860307445  
37.7612949798895 41.4636047919453 44.6918600441328 38.956280281655  
42.9887069977696

ZNF561 49.6241203903354 55.4106986624448 49.3000844711116  
37.9875302985336 51.4527545197672 47.8636003588181 54.0170817319522  
50.7364620410977 52.9482338979681 53.6429962450784 56.3884556031093  
52.6922486991742

ZNF562 96.6833301748676 143.068901273486 153.462055740758  
76.0975301977715 97.0055689383756 87.8967913380047 134.024691118762  
148.255880793905 91.9291200887492 106.679905803492 135.706144105357  
157.001241754359

ZNF563 48.2910530887214 45.5842286511645 44.8872784170036  
51.7739270955254 43.2484996523549 48.0350549043063 38.1793598983615  
51.9447450229707 50.3245489035833 43.6033221838149 47.9942520395434  
46.4499258373233

ZNF564 138.67794356779 97.7965639721152 116.949813289388  
115.913030448537 94.4129246851651 117.127994102455 120.401643722713  
116.103491885674 139.191263237202 177.047048502104 176.363810387584  
148.570371099987

ZNF565 54.1437245703767 50.7487159427973 55.0280380566685  
51.1055541075029 73.8251606025227 57.8005007012205 55.8678615468603  
52.9153129566242 60.2276476399612 56.0183341691645 57.2979215534929  
54.7727101923179

ZNF566 47.3289285415289 48.9771231212219 44.825830634601  
44.1483976313959 42.0709558258414 51.8812208789107 52.3242437351389  
43.8694505312625 47.3213303943727 44.571915452417 48.6184776976167  
45.9104478407175

ZNF567 44.1294459089314 49.857015233295 43.917817324545  
41.8778873678551 46.3607182640185 46.4648868771662 48.1747307200218  
38.8159908342801 53.7442594289333 45.0864985243943 45.310660704531  
48.27609330316

ZNF568 46.5759625882541 45.4143854024453 47.2055133646385  
42.1273928203021 39.9088079891223 39.9397419279057 43.3832826368789

46.2779564481158 41.4397539024976 47.7180816682562 44.0409178714232  
49.8472708021525  
ZNF569 45.3872406432794 39.6123051184545 42.5406888281114  
42.1273928203021 43.844855336215 41.4508241771315 39.1539892144371  
39.7509165247419 46.6944238390932 41.9666541498638 37.1059647239814  
41.0657892043496  
ZNF57 60.0793579902362 55.5294887653184 51.1347974668251 69.1931891474114  
52.4370718282084 49.2050538150106 49.1067959632109 72.9074911694002  
54.113533179847 63.3872214856708 59.1443775199516 55.0767527801658  
ZNF570 52.502055890816 48.3077814647455 45.310660704531  
48.309866878365 40.0599807618105 47.4699236780425 53.7423898357583  
49.8344973836834 45.7452456977857 49.6203214143464 47.299647867533  
65.4435809676217  
ZNF571 38.7229679986571 47.0981389355244 41.6550823405646  
42.8848887336829 44.147557390293 40.8091178323174 46.2448677480802  
44.5658219748173 48.3954967265007 45.9426591985894 47.5733603903505  
51.7833333848627  
ZNF572 40.6559419616644 41.8848959280916 37.1643693306382  
36.1562979552173 46.6397391251762 41.3553369544097 46.7100796279384  
39.7509165247419 50.4974478884077 47.4767851750188 40.1742127891824  
40.1700117452801  
ZNF573 179.158053533144 90.5603308057889 106.443777149496  
92.2530518251152 83.0497574039035 133.163926420863 133.229859346689  
96.4072955983042 69.9767092409915 161.48562926756 202.230726475934  
166.511915820497  
ZNF574 68.3234331335073 46.8236022402545 52.9111155236961  
53.9517841438975 66.6118713143653 51.294537308199 89.7242042805798  
77.2834482217973 71.0211264570699 61.8529316708431 66.1229691315616  
48.6037684272115  
ZNF575 43.6706764143908 48.2220547806679 42.640829914102  
42.357910063876 41.6806984441849 41.8613406887824 37.1643693306382  
40.931294690669 40.6957787921451 44.6918600441328 43.6629145624937  
36.1647506311964  
ZNF576 55.1306642449627 69.7855392178808 65.0359415104302  
55.2214187655851 129.270792739554 73.9456720099807 93.3897477314201  
73.4820932957859 81.2850357499192 64.6446465846487 68.1992221684165  
64.650642183463  
ZNF577 217.322595454018 129.478225450604 151.494249413592  
258.120500906788 122.702789229752 140.504336039225 186.620669365322  
311.055487966495 110.074666148474 266.9457657143 266.250887288858  
193.676161965973  
ZNF578 43.9309845324767 40.2493681589104 38.6727842796202  
43.1847628331565 40.4639532172338 41.4508241771315 49.540449125788  
41.2551966132486 40.9901805728485 46.5650556481721 36.5359455830388  
43.2776458914333  
ZNF579 49.2595762436995 45.3486182278177 42.3536549114165  
39.1706564265495 76.8964050504238 53.1052228246467 49.6872467499977  
43.2551508830106 61.0094935318105 50.7855742231932 54.4825201506931  
46.1592873342534  
ZNF580 64.8813495504917 66.5864907685351 62.4317959077388  
46.8199365586035 88.7928773498158 63.9371474698484 63.2726414544553  
56.3047629466121 88.1494891612632 97.4137766910365 93.769294435694  
67.1108025189303

ZNF581 178.188675055821 197.011675186182 223.219262492785  
235.169335305672 429.576301511638 234.873589896708 226.323448467365  
155.252915611651 211.669885749793 327.024556075244 288.687391623935  
213.933347509147

ZNF582 39.7576136507593 35.5310164682026 34.9849896310235  
39.2780515621926 39.4693871570028 39.2985791324641 41.8315602975157  
36.0306975524309 35.6970528713709 30.3383368296776 38.956280281655  
42.0424641526302

ZNF584 43.0930293831497 47.4076235350059 50.8303921211581  
44.265834798964 64.9072331703985 56.9320717885002 41.253645578517  
46.1673159982664 69.4009439491061 53.8260140375214 56.8436081694537  
50.7487159427973

ZNF585A 56.6086202928268 57.6459037974353 64.7847448333122  
54.5125550937898 62.588825192561 64.8903340853337 70.5534237141767  
71.3752456831662 55.0748878261048 65.1516921033166 69.3645322033576  
66.3230625217466

ZNF585B 43.7920955808549 41.9894412416874 42.640829914102  
44.0991023527481 43.0723817756832 46.5387044784895 40.7910160811527  
39.8016018354453 44.0202052410607 44.9673049606589 44.1533327883807  
45.7979032939211

ZNF586 70.18594926052 99.0815700721606 126.232262861308  
119.905655993777 102.655050997714 91.1926678904253 52.1860210611166  
105.870682345663 113.026772174726 165.220069268347 148.608392563633  
139.356696282462

ZNF587 38.8561375693335 38.2835812177457 38.5442780220289  
37.5382094267692 45.7452456977857 34.5886782974123 38.8417151851134  
39.853866204927 39.1467972692656 41.1638563416981 41.5421429082231  
38.3291713594599

ZNF589 64.720130807316 56.1355483199198 59.6565330440648  
75.8306078651291 89.4747568145717 69.4214927857472 110.477267932915  
66.6320017520888 64.5347406608537 87.1434190022564 68.6666478088834  
69.8505620106065

ZNF592 43.6706764143908 38.4330755397458 40.301483914446  
40.7481155008596 40.148780650831 44.8872784170036 45.7452456977857  
39.7509165247419 37.1820543575123 45.5776159432079 50.0303076717704  
40.0557788909923

ZNF593 260.656475394736 265.930422462959 271.008929897376  
201.208357379329 648.380417557148 254.472291205905 495.705224781189  
578.456468865003 275.742101339413 291.596692248591 204.7424893289  
176.461729584652

ZNF594 72.613397507717 81.8426140611297 83.2737524877952  
78.270329450618 88.6838633595745 98.0473811574767 131.808634405319  
67.0904616289706 60.8635925649592 84.1639779987105 91.8414653633828  
78.0586153423713

ZNF595 38.0089018744739 37.4540772310118 41.0356368374708  
40.5484717678957 37.2567512265363 39.6251842352088 32.4466419672036  
32.7676164492555 36.7267557061938 42.3606390470387 34.5633623842083  
34.5633623842083

ZNF596 41.0043775553254 39.0894172982439 37.0642268327439  
36.5183289205243 41.1868052124344 43.5752393599169 41.3094485574845  
37.7612949798895 41.2870505273664 40.2112371512838 36.8730514568925  
37.8129870676592

ZNF597 41.5421429082231 51.6869155634183 70.2577825186943  
54.6089451252049 42.9090346219023 49.641159251878 39.8695929627783

68.6704961638492 66.3209349903185 55.0016608333828 46.0905079010237  
53.7442594289333  
ZNF598 160.702832529922 280.820745089796 328.962069934895  
148.781721594419 249.822387177805 162.513675180449 151.709689636448  
103.734064904898 165.311139930529 132.52749757795 146.196470375622  
122.036614711384  
ZNF599 43.4626049853157 36.4002279956519 41.2365089689635  
39.1706564265495 41.6806984441849 42.7107928951766 45.9635923776719  
41.4812544772644 38.7298222155532 45.9426591985894 40.1742127891824  
41.6550823405646  
ZNF600 84.1254258487497 51.6060290544385 54.0536858212253  
87.4850071876743 46.6397391251762 45.4882438975269 63.3924515518667  
125.642081865992 50.3245489035833 97.6023731094756 101.366082149647  
111.607814098243  
ZNF605 89.1632548302738 72.2016884438365 65.3531590366085  
49.7350276169552 70.8749669449099 69.1523164481201 91.8733417805775  
55.421880601441 91.3362264594431 85.1950626054282 65.342842101283  
66.4626619269287  
ZNF606 53.8856501960117 47.2055133646385 44.4311655729487  
44.6905691366696 51.2525124735102 47.0027453663546 61.2183034191703  
57.6684494624163 70.2541961995753 70.2565873027242 67.2575005672188  
56.7711602236706  
ZNF607 73.5025309968566 49.0697565324841 42.1860813954352  
40.646702696033 41.7929491793697 43.2427390263564 49.8865955311391  
39.9927637255545 45.0755084221375 45.6271294527191 47.5439485437351  
43.423558862426  
ZNF608 43.4626049853157 42.6939394537076 49.9256753636167  
45.5869891570251 45.2556760873335 41.8613406887824 48.6395795163502  
41.1575777497576 60.3351200884626 60.0372015630618 46.1673159982664  
49.7336769474446  
ZNF609 120.630151942485 146.763378089693 72.7987593815919  
79.7937658787441 123.261654256925 93.9228336493696 110.837476359817  
109.481322353402 97.7114610828769 200.059649606808 168.67163443217  
154.551927302005  
ZNF610 35.2267149016596 41.3610369241157 34.8956628705329  
46.1673159982664 41.5668884168669 36.3845892764084 41.3594868055879  
43.4544762830742 40.5912213523345 40.5090849993014 38.6662194645633  
37.0953622406687  
ZNF611 43.0930293831497 52.683711208052 48.3458108324478  
42.5193208629123 40.4321207743917 41.3094485574845 43.4885245598939  
46.8954576545929 37.6630259432398 43.4885245598939 48.4717951775049  
46.0633179231318  
ZNF613 82.1323695817857 58.8281931439093 60.8357760968871  
66.224559122062 48.0987228351168 63.0205913130827 80.2289541115146  
70.355653090662 66.603126065489 113.46454061183 75.2150154717572  
89.0203733091224  
ZNF614 120.630151942485 125.446628066221 75.651446553407  
91.3967044940546 97.1271615802556 110.637910297739 143.497887869284  
82.0102749744973 124.064628168507 118.168529531403 97.4829901136163  
93.1850674428555  
ZNF615 109.5145190042 101.699631771662 90.209585044076  
93.1668080716761 80.5437011468815 151.088035451997 148.059385111127  
65.9143782252686 91.6978282652998 163.458716079887 110.09868737254  
124.791747507205



ZNF616 60.6441065119394 61.3428092991286 85.4536891882639  
63.3006977162657 64.3571664944642 62.6839349907803 70.2635892414678  
51.1694248620208 73.3042538589134 65.3377940117969 66.6788758487969  
63.9371474698484

ZNF618 114.666088291556 94.5261917871909 62.9967097752591  
76.0101530264463 99.9752275166514 63.6894484284172 89.2120958473987  
80.3860547572521 75.3761360028971 68.6788460999238 80.3500323413132  
55.9283039581662

ZNF619 35.6111578834671 38.7344853699576 34.1806289878747  
37.9875302985336 34.806104801006 36.8059561571675 41.3594868055879  
34.5886782974123 36.8127605061228 42.5664883002833 39.9070785037411  
39.1553169409075

ZNF620 38.1169703906207 40.7952353240579 45.8844325913247  
42.4580504587581 44.9936360641969 40.244271403831 50.2016912396771  
37.33030683349 41.2870505273664 41.0057887014368 46.4205654140754  
40.7704587752083

ZNF621 118.05982513603 140.264270771578 120.221914344372  
133.1387411908 364.044597485771 161.04166688561 147.010700944686  
117.723425661764 124.687212034276 185.874151272261 134.776408077533  
134.489077146096

ZNF622 427.451886998067 264.924262411772 263.068504548549  
467.351570171652 216.943972794603 293.516547661658 469.78210773245  
319.328571608303 357.182869779274 373.714692628967 310.706520144173  
301.139592414061

ZNF623 49.906758177954 50.1520209533747 46.3411353377615  
40.3180310664156 43.683792219729 43.9366081640576 47.0874209746031  
36.7016645007743 53.1249776278067 43.5627649099623 45.9104478407175  
47.5540235065658

ZNF624 43.3638918705225 41.9495387255163 40.8846826807717  
41.4273122914951 39.4693871570028 42.6575535390785 43.7585538437696  
44.2159020605784 43.7630587657205 43.6033221838149 42.6776449468246  
42.357910063876

ZNF625 47.5647821785529 45.6533175604486 54.3554233228353  
51.0175677516029 52.3242437351389 50.7516773099639 52.7002314230604  
44.797320243931 48.8067321016961 47.4767851750188 43.401782064778  
46.2625470410195

ZNF626 68.4352167527791 65.7753115172195 82.6157566292355  
61.1490925675473 50.2163892855092 62.5036823572932 75.2337946941103  
49.7949228653588 119.124583755587 80.8593396441328 88.5511408870489  
120.392561825049

ZNF627 155.982503792091 166.097017297742 115.610095595509  
105.234356571498 184.235914591152 129.434864701718 158.702003835578  
172.070926124844 182.9407471819 148.514056973195 138.972884942374  
146.007510897838

ZNF628 49.8472708021525 43.5873188565519 44.2405728317107  
44.4367387274922 58.2780916793348 45.4882438975269 51.1541843174981  
43.844855336215 56.432280646473 41.6373771565199 50.0808824383821  
42.8864415494484

ZNF629 70.88236913251 48.4072568263884 60.0856496605043  
42.281606728072 75.5861488664745 49.4157684139858 63.2138085858392  
103.776211832712 54.9426456410692 59.4969799685856 67.3976855661302  
55.5712957590038

ZNF630 56.5451429304872 51.6060290544385 44.7255207589606  
52.1201052574162 48.1473938886239 59.0686629877982 54.5772630900888

68.8058577447202 61.5807110546718 64.1097859982912 59.5830868881343  
55.9555622193202  
ZNF639 45.2875173643252 36.9994058279362 41.3366779545815  
40.5484717678957 38.3561682218911 43.2805590023412 40.7910160811527  
50.0526763693329 41.2870505273664 40.8970401536578 40.0766543123257  
44.0451487108213  
ZNF641 69.1641374421455 56.2305155589239 70.56368853915  
73.3725472767369 73.5541045639348 59.8102324370568 65.2361525412756  
93.5358142196619 57.7865070833351 93.7782490229256 98.4699679900651  
85.2364387652201  
ZNF642 53.3059058105836 43.5182502375207 49.1067959632109  
51.7739270955254 46.0977687311222 45.3882138838137 45.1017494688414  
43.3262148375525 55.7522234735038 45.5776159432079 45.5707650534259  
44.5432192783161  
ZNF643 44.7915315085948 46.0323106800336 43.2721716572958  
48.1662933382789 44.8351976221735 46.5387044784895 46.3611042575528  
52.3068458655445 60.7480970026669 44.0409178714232 40.4094901248527  
44.2527566343661  
ZNF644 82.4263339218052 61.0782327455123 58.7625374942126  
63.3819918509711 61.9944005465335 64.2690842803282 75.2337946941103  
67.9410473129639 69.0037087543684 66.372364191975 67.5709261701192  
63.3020122223767  
ZNF645 38.5648843914189 42.4493032770053 36.2683886571585  
36.6501141438378 36.3390947880186 36.8059561571675 38.941855825269  
34.1806289878747 39.1790517315259 34.3674468322242 39.5399188536544  
43.3744503319109  
ZNF646 58.0139597055449 45.6533175604486 58.7382738968248  
74.8706881113318 60.0736861987141 50.7516773099639 52.561573697155  
71.5062409407193 49.9951674107458 42.5664883002833 48.7502645382856  
47.0130468198828  
ZNF648 39.266565827316 41.159706131351 41.6079958749402  
35.7674462337723 39.4693871570028 39.7394181011603 43.9450023643394  
37.86982638952 38.4344387289956 37.6383530120621 37.0180934800573  
37.7526485343328  
ZNF649 47.9175508887533 60.7495043977707 42.7303139017786  
46.3203995372658 54.5683518971261 61.4944752562671 60.3928833351886  
48.7814131120945 43.7630587657205 64.0162246399972 54.2999306485758  
55.5712957590038  
ZNF650 109.5145190042 123.176449895397 144.578232267116  
137.335224748204 137.132535402637 132.364260893831 87.455991111513  
154.111066539468 115.221134337342 100.849815617918 114.093655272795  
124.469290554848  
ZNF652 673.522667186915 369.451882513347 402.978328664331  
544.355979695242 306.746364062777 293.300203370043 564.929183025034  
1111.13061382818 296.271895016431 786.57695312967 687.011162822211  
523.465208483426  
ZNF653 118.27400376579 138.879948269545 126.017900743748  
100.483113678344 167.16650846037 122.904323796484 152.17335005192  
133.810601514962 146.046179302584 163.360824752796 168.67163443217  
107.440379066528  
ZNF654 42.8036731479932 52.3187919317561 56.6188723715434  
64.7703246910536 50.1314528043038 65.2295773603116 57.4495700355678  
46.4379857641858 49.6872467499977 46.1706601233531 49.2206713037152  
58.8559455338355

ZNF655 66.8764304705723 65.2125527940945 66.9549941973099  
82.6157566292355 68.7159356692728 60.2528550551807 66.4258159334241  
64.5531442955004 63.9851732498913 66.8026147385682 61.2431917618973  
63.5295088521896

ZNF658 38.385865183581 41.5132248356707 39.0775870687758  
40.0698728584484 37.9116800161496 39.8455060654531 38.2933870238743  
42.4580504587581 40.0403898620771 43.6670755115848 41.2267153672559  
40.3316153483289

ZNF658B 46.8806594777844 43.9421822132391 41.2365089689635  
41.9495387255163 43.6587492470348 45.2508153774277 42.1308615354951  
43.844855336215 47.0084506325835 46.3715909653832 43.995454742337  
43.6285248402465

ZNF660 56.121460370892 60.1685144469519 58.5212649095879  
74.8706881113318 75.9909523932333 65.3096524773304 72.5956443098684  
60.0835531094681 61.0094935318105 63.0119737420787 67.5417980425932  
54.9919060580109

ZNF662 52.0299937917925 58.0218262176065 98.8595497262968  
48.1662933382789 126.492854172749 51.9421032049606 74.0039764902057  
44.9977782988116 60.164635768614 85.1950626054282 72.6162848018047  
71.9369353731849

ZNF663 45.3872406432794 43.5873188565519 44.4311655729487  
48.1662933382789 43.9450023643394 41.2567470068038 45.223075311113  
44.4031868028216 42.1594905198929 46.1390887492649 44.6286581923295  
42.0424641526302

ZNF664 80.8285585008048 75.7801512652102 80.1665291227124  
62.3936376596431 89.0203733091224 87.8967913380047 93.2133061608764  
66.4207938873541 85.7111041637416 60.9905272201951 66.2027948645675  
79.4710406831985

ZNF665 38.6454098044474 40.148780650831 32.6121532029976  
39.9697332660833 40.7779767565889 40.5281496800812 43.0930293831497  
36.7460922671619 38.6322728994674 42.785429206422 35.6970528713709  
39.4490233720848

ZNF667 47.7267190613906 55.2182004838121 48.0654860391912  
41.0726336841311 43.4544762830742 52.5799250974039 51.7714254834195  
41.8767957887205 43.423558862426 50.6486940895674 51.7538628098347  
48.1627097465883

ZNF668 189.890451486324 164.072453709966 161.588263691127  
360.668308246913 259.769260154253 125.137803364368 183.887843429281  
209.178131628825 150.374739898477 129.272985305607 112.428734515811  
102.899135663993

ZNF669 72.4966502412724 74.9059650336395 72.7987593815919  
76.0101530264463 60.9710783023013 53.792558158226 82.2650787041549  
130.336599857526 73.6965494979349 93.2870243833082 92.3901719424121  
92.2095095678497

ZNF670 46.68364047986 48.6447083765118 43.401782064778  
39.1706564265495 50.4260283682427 46.7800033479223 52.7002314230604  
53.6782125131958 45.7452456977857 45.2556760873335 46.2560238004757  
44.4951343330035

ZNF671 50.7390160399184 55.2182004838121 63.7744603935682  
94.7283425282671 43.844855336215 80.8333046859586 38.941855825269  
41.8417024632349 48.6494451061637 127.034476771265 85.0653700751969  
103.876328830067

ZNF672 238.338646661062 184.484466722861 181.738902391483  
181.814283147675 218.552143403657 208.097209050425 354.973265582488

264.212242593461 252.487015579489 225.056827821165 211.227389226633  
202.081933301612  
ZNF673 43.5710871617107 41.8848959280916 47.9035532886869  
41.4273122914951 43.1252272136667 46.1513019317765 37.0564573649223  
40.1474543172332 50.3245489035833 54.6089451252049 36.6298807161755  
42.9887069977696  
ZNF675 39.5676051939342 41.3610369241157 36.8730514568925  
45.5869891570251 38.8456942580061 42.157627240486 43.5627649099623  
39.3709357615493 36.5393857306744 46.0119912782855 36.6298807161755  
43.6753843488695  
ZNF677 43.2724556187214 37.6383530120621 37.3687900733549  
40.1804147506786 40.2449343247539 34.6977013306396 39.8695929627783  
40.931294690669 45.6582729799009 40.1179210534118 44.9713479185144  
51.9447450229707  
ZNF678 40.148780650831 29.9775071862804 40.6737160001291  
34.2080003860523 37.2567512265363 34.0045980663271 33.6696565339534  
39.1652965788406 34.1294694030979 35.7202909649682 36.7283081422707  
37.2810767789306  
ZNF679 41.5421429082231 48.275452803061 35.7105247506212  
37.8442841690502 35.5220586859301 37.8102105794655 37.830876898596  
41.4508241771315 41.7627910693483 35.0668743708816 38.745552403895  
41.3481355128089  
ZNF680 54.8439819445945 60.4646208319121 46.4569566520107  
47.3574589211166 45.5809132232681 57.2767879969284 69.779139490544  
71.2867274976738 93.5665536754775 67.0163226819964 65.485076402841  
80.4404044229341  
ZNF681 39.4250105372135 40.8476436931481 39.2707964550441  
39.1706564265495 36.8442943492616 37.0725935143353 40.6216891610774  
44.1311654985682 42.4784375889044 43.9450023643394 36.9802857205455  
41.0226232127351  
ZNF682 665.122091380755 297.950627905767 328.387270297393  
439.955651727755 238.077051775147 197.011675186182 465.595459259015  
772.368030410394 303.458085392002 683.099079617304 608.005012673672  
558.855313555287  
ZNF683 64.668912004173 50.2696827764943 52.3432130135266  
42.5664883002833 47.5647821785529 43.9724628401189 49.540449125788  
53.9465584609317 43.0930293831497 59.8130420783374 138.568626520133  
49.2064066614865  
ZNF684 56.1912096308988 46.7591817286632 48.2883694323339  
45.4634652319753 44.4489662507893 48.8744644207821 43.1931731665131  
44.1311654985682 59.2566572428546 56.4553747079294 46.0905079010237  
46.1592873342534  
ZNF687 46.441301934328 43.3458769998118 49.1067959632109  
50.2163892855092 44.5668141895992 38.5252456306656 55.5578334877425  
58.2043532960091 49.9162522057712 52.5522545249206 47.0110068985119  
41.5536168238478  
ZNF688 62.0104160416544 55.9269493191353 66.0411740221276  
66.1082848714279 110.992997780544 74.3729155936862 44.6809101024392  
75.0377156190383 55.898892031444 65.8703820581684 69.303129494807  
62.1718158914638  
ZNF689 131.738693662183 151.936097714553 165.336029381509  
112.000099082544 226.262409390222 155.270252661048 80.0733119200914  
211.685526927495 81.2850357499192 146.87603018486 143.122201568705  
129.434864701718

ZNF69 1305.35453202355 763.947361966861 913.230569760993 938.151864971251  
509.004054793277 551.490493022416 975.02086340962 2348.48320928245  
494.162646055732 2045.24530722676 2243.24648907474 1423.29307392266  
ZNF691 79.4528447794527 49.9547657591437 60.3973027611091  
63.3006977162657 51.7983110178095 46.8954576545929 58.7585623394335  
53.4109882045447 62.8635815439291 67.9259304928255 59.9682734755814  
61.1022920882065  
ZNF692 150.505000526934 149.213844580441 245.060552951511  
96.5813769696577 183.165559564289 66.8632294055679 128.844013736935  
128.38299874379 106.654782265295 232.815747390118 167.25176386043  
150.709301569371  
ZNF695 42.2455707947223 38.5252456306656 40.4882741869718  
40.7481155008596 73.6965494979349 44.5544727111028 82.3887053739195  
76.0709828871754 50.2223403889892 38.3092241935352 43.0971787292711  
39.4490233720848  
ZNF696 110.048921728774 118.385089099623 85.1981126713031  
56.9299697426319 112.159199477006 66.6320017520888 85.2088054619229  
63.8008894786105 69.2001494999588 63.6197695952215 70.0965466297064  
68.6047087267554  
ZNF699 49.5666074434383 51.5769920982698 54.5567393666386  
60.1837189855762 47.8697093824642 47.4699236780425 47.3661873039785  
46.6384636367629 50.6346949248834 43.7303813515864 49.8393069675192  
58.3285450269055  
ZNF7 174.392758289374 205.627744150936 125.588228083829 93.6212502203405  
107.427186954956 130.02102880365 112.805898501551 104.822963389102  
117.005559382662 157.121355906194 120.289145237975 142.945182805248  
ZNF70 40.7609952437622 38.5252456306656 45.5883690965192 40.1804147506786  
37.956732373465 40.8634043028528 43.4544762830742 38.956280281655  
41.074824727477 46.2286164776607 35.046946054314 42.357910063876  
ZNF700 105.962195935529 165.606015336587 148.458171821142  
141.087571926258 112.659254685552 107.490296194878 114.321083441061  
172.221482103025 127.232160404726 171.957278903005 147.9291840243  
148.006731522923  
ZNF701 39.266565827316 53.2046867327331 47.2055133646385  
54.8412943008635 43.2484996523549 46.1513019317765 46.9929836306816  
45.0972184964705 54.998510746958 45.7911932481722 53.1505787220552  
44.8372404608604  
ZNF702P 48.1952521496489 78.1204313889396 87.3634135323569  
51.223859150798 48.0234896130991 48.8744644207821 95.6697427870979  
48.0582855095143 134.504159974855 65.9189023794337 76.8713035584472  
105.828093778276  
ZNF703 40.7609952437622 47.7902961065936 40.8420925848403  
42.4580504587581 47.1566888648998 43.9421822132391 40.4882741869718  
42.9301944191913 42.8414096678708 43.7303813515864 46.5152061488355  
46.5975976305093  
ZNF704 53.4921736109774 46.5650556481721 49.7350276169552  
41.0726336841311 69.493532577364 62.7515429046888 55.0897019602305  
55.421880601441 56.8622704143595 49.9493230064613 50.5810338885769  
51.7833333848627  
ZNF705A 41.4508241771315 39.7835513496873 37.6557714476853  
52.6947911480086 38.6454098044474 46.8954576545929 40.3302268293707  
41.7419877611072 38.6322728994674 40.7063426028871 45.310660704531  
44.5432192783161

ZNF705D 42.1650127805175 43.8163035242859 43.6670755115848  
41.6564075217517 42.8589586745166 41.628211174823 45.9426591985894  
41.5464765641928 45.2366551808541 47.314454771621 41.863927676552  
44.1452943804044

ZNF706 110.88526946931 80.3266484520306 62.3936376596431  
77.4307558516809 97.8309399470621 123.948705613908 141.364814429951  
68.8058577447202 138.738440901853 114.711404298369 102.027922691582  
95.9391851122771

ZNF707 75.4732674021193 67.2649356062263 65.9476039189301  
55.2214187655851 46.3150221024046 52.6226745117396 60.2399886747451  
58.8022152133979 48.5792058061372 60.4837400912239 50.2203578628217  
45.0985088502363

ZNF708 43.2724556187214 40.148780650831 40.4882741869718  
41.4273122914951 38.745552403895 41.3553369544097 37.6036146841933  
39.3709357615493 41.7627910693483 42.3606390470387 42.0750889188255  
41.4508241771315

ZNF709 48.0201377454632 40.7952353240579 43.1931731665131  
39.9697332660833 38.5512429290626 41.3553369544097 40.7910160811527  
41.3506832276112 42.4540072551568 41.9666541498638 43.6629145624937  
40.1700117452801

ZNF71 43.3638918705225 45.8669209716694 43.8495248991589 42.2496337895968  
40.0599807618105 40.9506062495231 50.2016912396771 44.7044140979108  
39.4762546236449 45.0155543555707 40.4504608195666 44.2527566343661

ZNF710 36.7356360093603 39.1982470626863 34.5718473203083  
38.6414316877471 38.4540849632254 32.771863438151 34.806104801006  
38.5457716679071 33.4698406117406 35.0668743708816 37.8372168909583  
38.745552403895

ZNF711 38.7537364570873 40.6723334103791 40.4882741869718  
43.1275490164761 44.3557408297309 39.066284740632 39.8695929627783  
39.8016018354453 41.863927676552 44.571915452417 40.9583127801887  
40.6216891610774

ZNF713 49.9718538204798 48.4980626712175 51.1347974668251  
48.4916117779992 47.6884372645373 48.4758590019384 51.3064929551674  
47.3172462673426 51.6731332961917 53.8260140375214 47.6884372645373  
48.3648494350286

ZNF714 51.1055541075029 43.5873188565519 36.8730514568925  
39.6292788039793 48.6224651100733 42.5660695551615 48.1747307200218  
44.9977782988116 45.6582729799009 40.5090849993014 45.2265319826548  
44.3521099857368

ZNF717 43.5710871617107 55.0897019602305 50.1860191642359  
43.8002456102021 85.2849531543957 59.8102324370568 56.0515443021293  
49.2019743609873 55.4030910454028 38.957687788868 46.7386599624801  
50.4847465816184

ZNF718 43.7585538437696 49.6203214143464 45.3974838013476  
51.223859150798 49.452985143568 47.5733603903505 54.0170817319522  
45.9604707098953 41.9635525160083 46.8954576545929 41.5421429082231  
49.1200355938198

ZNF720 55.1306642449627 48.6447083765118 43.9450023643394  
48.9944486068347 52.5645416722441 48.1591264215184 33.6696565339534  
47.2009420656854 44.3440839686558 54.6089451252049 53.0177144132449  
45.6692241948108

ZNF721 106.356074933606 103.961956810572 113.454378667943  
114.224091812993 124.791747507205 104.492750153479 129.538159906075

126.10194284238 154.111066539468 199.54796711653 183.90338485542  
184.65212689433  
ZNF74 77.9493708990494 61.0782327455123 46.0241950824438 49.0816063338953  
77.8719565457879 47.8636003588181 59.8916740212935 65.2295773603116  
66.2134832989335 55.2998422481855 58.133863696399 55.9249770393176  
ZNF740 48.2910530887214 47.6914221838216 41.785676764591  
41.1886975241176 52.4370718282084 48.7781962164988 46.7100796279384  
50.9933795450314 48.3954967265007 47.1001757441025 43.7585538437696  
44.5432192783161  
ZNF746 205.086228002776 224.030034866938 196.096147690942  
213.345169940536 223.316311787046 176.224645007435 106.486195938039  
128.996351661564 172.39907939484 156.69976952483 149.24022100428  
166.036790614812  
ZNF747 41.6354649482853 37.3634897565502 43.1931731665131  
40.3180310664156 50.2163892855092 49.9699131196797 38.1793598983615  
43.2551508830106 44.8003345643334 40.8970401536578 44.553780984244  
51.5741598315033  
ZNF749 39.9697332660833 41.8073910693411 42.157627240486  
37.0732977341185 38.745552403895 38.6414316877471 45.6042625176633  
39.7509165247419 40.3316153483289 40.8970401536578 44.7114813656401  
36.064718696392  
ZNF75 70.3757673501097 70.7702047405718 64.2404293863468 93.1668080716761  
65.5029051840465 63.3612993417558 52.561573697155 72.121833189378  
76.3790849853724 110.219274023648 87.8967913380047 65.6213260281822  
ZNF750 66.0303950772736 297.260074903246 142.34144664795  
42.4580504587581 268.309382865636 71.6050174762551 254.112875195524  
442.711822532078 174.559216176175 135.824520574227 184.808179948172  
129.336439341458  
ZNF75A 51.6558970571712 44.7829632472754 43.0971787292711  
50.5310598656998 47.6884372645373 49.8472708021525 45.1017494688414  
52.0503062610092 50.401623258584 51.4454142248566 54.2999306485758  
52.4992300612807  
ZNF75D 56.2508140932179 40.8880530359822 61.2153068100932  
37.1894304543751 44.147557390293 63.3612993417558 61.2183034191703  
41.8417024632349 41.4636047919453 78.59966540743 41.0808257270221  
62.2025996860055  
ZNF76 98.1495112518979 83.1979076141836 86.9924799927707 79.7937658787441  
75.3580625318157 91.640286556353 103.316970096472 75.2101993995344  
82.2694707335812 132.341766267192 118.467231612638 91.7158434954226  
ZNF761 60.9710783023013 57.7757446006652 49.3000844711116  
46.8954576545929 71.7263663921367 56.4819802857598 57.2758638871082  
127.797511870397 54.113533179847 48.7414853386615 49.0361180089431  
47.3992733452821  
ZNF763 62.5528124447176 81.0331497830643 66.4079972657486  
74.0093517743852 52.4370718282084 64.7905331739366 78.9900928241723  
107.232979387172 71.4864243594056 128.873145026756 108.323780226301  
86.3888090084564  
ZNF764 40.3478825593224 39.5050383901884 46.0727230219512  
41.5464765641928 44.7829632472754 48.0350549043063 52.561573697155  
43.844855336215 45.2897806651929 47.611018474151 51.4413099192899  
38.8495095797881  
ZNF765 38.7537364570873 33.3643994200057 40.4882741869718  
38.9534635879195 37.1565984182084 33.895835691032 35.8227939208521

37.0390589468421 32.7294532998931 34.2638875325204 35.3362091871364  
37.4554876386402  
ZNF766 38.7537364570873 30.6802399384205 35.3649449469275  
29.745266251498 34.1686574241133 38.5252456306656 37.2892641289258  
38.956280281655 38.6322728994674 31.1401844809132 39.8184668132023  
41.7575097298927  
ZNF767 95.2614267797703 77.6653462778309 107.161099000408  
74.6159297822533 96.6128615107975 75.1674447943072 97.0155195562193  
107.490296194878 77.3367966395554 160.733526836282 151.111664091983  
105.05842887748  
ZNF768 85.1950626054282 45.4143854024453 54.3554233228353  
44.1483976313959 93.2630594602634 54.4753345912615 73.4820932957859  
124.605379715077 41.863927676552 48.2596564318071 73.5788549535062  
64.3571664944642  
ZNF77 58.1868359012515 59.4253780950488 74.7625228047952 54.1240583139871  
76.3790849853724 59.1570467228834 50.6774883370457 60.5571721986885  
81.2249082772437 62.5036823572932 67.8570354010492 57.934622029119  
ZNF770 149.076166432567 127.283778555702 90.3485862002091  
115.468303687641 205.187554095744 172.929453277107 135.323750661937  
114.719721626067 175.28322146764 160.53293875611 155.795095438102  
135.592113666246  
ZNF771 39.9182914210537 41.7337506166619 45.7452456977857  
37.7469621225553 42.9655396732962 43.1826328292558 41.4742337714895  
44.2527566343661 40.2615278292875 49.4006068471301 44.9713479185144  
40.7704587752083  
ZNF772 53.3059058105836 60.7495043977707 54.7855575216687  
55.0604256312495 67.0163226819964 50.2163892855092 63.3924515518667  
48.87875862356 76.3790849853724 64.428683021978 60.8201366212589  
66.9239565096247  
ZNF773 109.363566993814 107.331284864757 124.551483147457  
124.976348531594 94.3450965454031 92.6036872789676 161.205086002542  
168.307676704652 149.691911022686 145.509901200987 140.245630405973  
130.946383858668  
ZNF774 44.3355304829989 47.8400694856726 41.437237454134  
34.4382958501338 38.4540849632254 39.8455060654531 39.7576136507593  
40.831207953647 41.3803269429468 47.0055981216687 46.6442692119997  
48.8670821164567  
ZNF775 89.9580440276828 59.1938299291358 50.5089777244781  
69.1931891474114 58.037539503209 96.6957892186886 53.3111230705754  
77.6174893940285 64.0541263553251 88.4385631861141 92.2772139468085  
70.8546350449171  
ZNF776 52.0299937917925 46.1569135229922 52.2132783757422  
56.0794100106654 54.6820069269589 51.0506441018166 52.8496345990125  
46.9986083378817 58.7382738968248 58.2818491355907 54.0374522273907  
58.5087296620514  
ZNF778 52.109723558511 47.2055133646385 57.423873475544  
40.9607305725196 55.3100442506299 48.7781962164988 48.6395795163502  
54.1731035633439 47.7086093893038 51.2318935933116 44.3763859390287  
46.917149434588  
ZNF780A 41.4508241771315 42.8542642792862 42.4580504587581  
40.4359177791566 38.4540849632254 40.244271403831 43.8206425661746  
39.0620487644635 43.2761454096265 36.0481934423077 45.310660704531  
49.3984571719129



ZNF780B 39.4710743516517 43.8495248991589 43.4709415392696  
41.7614975630362 42.269054475455 41.6590564937735 36.9355798143571  
40.831207953647 44.1519466943185 40.8049408996274 43.3085358214154  
36.7762265039864  
ZNF781 47.3289285415289 43.7410507935043 44.5544727111028  
44.7980740332174 43.9450023643394 52.0299937917925 51.7714254834195  
43.5544347011646 45.0017158586743 47.4767851750188 47.1098984140276  
45.9104478407175  
ZNF782 39.1590964332473 35.1224289925572 43.401782064778  
34.8137085420423 46.7508829977587 37.4782441311626 36.4098694708483  
42.8482181313226 47.9035532886869 43.0919221375514 44.3763859390287  
46.6397391251762  
ZNF784 62.6702927225656 58.4476706144086 59.1040441894478  
46.3203995372658 85.5362566454799 61.9432904657734 63.3924515518667  
50.857522488428 80.4554147910354 82.3488166506716 75.6883778954949  
58.8188963227059  
ZNF785 62.5528124447176 48.7847528954724 51.8122261766744  
51.223859150798 68.6627996695828 48.4758590019384 46.3057385979341  
59.8760452220989 47.27543600687 63.6197695952215 66.274247400793  
56.6146179789815  
ZNF786 398.641868389511 165.061411701316 247.074756460224  
328.962069934895 190.703466372947 161.180847265279 268.144525192544  
650.328627263899 164.072453709966 557.455966274117 546.94113683381  
348.450810225807  
ZNF787 274.731304343034 357.800871454252 369.355222586283  
286.291779906932 723.853348464335 335.943994595615 434.682456437647  
320.74875942191 569.511773053233 323.957165066178 375.036941898486  
272.257070024902  
ZNF789 83.9306218829441 60.1685144469519 76.7137782332689  
52.1201052574162 82.9322141700549 57.8944021095265 55.5086026637973  
77.4625808567081 68.1209771323232 62.6270592859102 56.3106156221316  
56.1463616087682  
ZNF79 43.9309845324767 51.3084273211359 46.4569566520107 45.1944222548351  
49.452985143568 39.9397419279057 41.706879587091 47.6952179922944  
40.6957787921451 46.441301934328 56.9320717885002 44.1452943804044  
ZNF791 82.291097567232 105.204861495017 114.224091812993  
84.6435656850129 112.391188787919 112.421316052392 106.878946016737  
95.1037791424727 134.646159826262 136.859309317164 180.592281750722  
160.100408020768  
ZNF792 66.1229691315616 115.016486106706 74.3523005665671  
63.9570596163747 89.1012752492647 50.5148383400703 111.714563124738  
107.232979387172 129.820909990346 78.6859709780134 69.1414574152997  
78.6048653630165  
ZNF793 42.2455707947223 46.3635803515159 40.1985790927248  
57.2856683017619 41.6806984441849 40.9506062495231 44.7255207589606  
40.6171774724171 45.3756389170606 40.4136535208406 40.3452320167286  
47.3992733452821  
ZNF8 42.7150227340364 38.3322849790657 44.7829632472754 53.8086134112366  
33.3231576795423 43.5752393599169 43.4544762830742 40.4359177791566  
38.7298222155532 35.4990901121893 45.0589947942306 42.0424641526302  
ZNF80 44.0328992213727 43.5182502375207 44.1452943804044 39.853175885492  
51.6869155634183 41.6590564937735 47.8947595316832 42.5435283762933  
41.9635525160083 49.1928206164702 43.9450023643394 45.0985088502363

ZNF800 99.0545942554244 168.78407943637 103.64431747876  
180.502282381416 145.267770598988 129.091447141381 132.24963384417  
100.499763255098 167.198128794195 134.519244495139 103.727217972304  
138.81810375553

ZNF804A 45.6517320730042 46.1569135229922 41.9666541498638  
38.8495095797881 40.6723334103791 42.157627240486 47.7390230243778  
36.6452480995946 42.9020321355927 38.745552403895 37.3687900733549  
37.3600014814388

ZNF804B 37.6397652536077 35.2143190355414 39.991353369336  
40.0698728584484 41.7929491793697 37.1317006162938 42.2577689927563  
35.0510338774593 40.0403898620771 40.3235655331796 39.153226699662  
34.6720534245631

ZNF805 62.0553450433433 62.5528124447176 62.9313387640547  
56.9299697426319 72.9154861179393 57.4777075615651 58.0969258817391  
61.6839343510302 87.275548276476 72.834275688835 62.6048727240291  
63.4685821260797

ZNF808 42.8036731479932 40.148780650831 36.2683886571585  
35.6928955245309 33.7494761745342 46.1513019317765 45.6042625176633  
36.0306975524309 40.7847110517594 40.4136535208406 46.4753015651202  
38.5279745308203

ZNF81 39.8662795144616 36.7976562409506 41.8751578329365 41.4273122914951  
37.2567512265363 38.3418933808844 45.7452456977857 46.3685439301234  
55.1253465069845 54.4825201506931 48.3847843498476 47.6938628797168

ZNF813 68.2614370871382 57.0082102559228 44.0451487108213  
41.7614975630362 61.3077641493507 50.4022543872993 58.2315917325629  
68.9522412475296 50.401623258584 53.1993028936883 64.5347406608537  
66.737740728688

ZNF816A 105.45765455249 152.880772824839 151.067886009549  
122.217982672531 69.493532577364 80.9821967801845 159.359051158123  
120.850874262069 163.299997237276 384.727543700024 242.932905246176  
350.917244438732

ZNF818 36.8072833828297 36.2103905554984 39.7411455670172  
37.1894304543751 41.7929491793697 38.5252456306656 46.9929836306816  
36.1375121409002 47.6195009345747 41.4397539024976 46.7386599624801  
41.7575097298927

ZNF821 78.3851687801705 69.5544840164738 99.4546022538476  
73.0371862899659 75.2391243965793 56.8505380943422 107.148000219752  
76.3509533017572 98.5609311953771 88.4385631861141 80.8366627364071  
56.9379721393904

ZNF823 84.511841810844 102.38706554984 92.6672238953636  
46.7577982595088 107.427186954956 72.5482509922085 122.316617618658  
212.622278823808 127.974232708236 109.525921548011 116.195366065932  
112.585860083115

ZNF826 46.7293238583888 41.0678614026819 41.1367478979484  
38.6414316877471 43.004943518025 41.0582900711341 42.4939802311136  
41.3506832276112 45.4799270968969 35.4990901121893 41.4508241771315  
39.9519547348106

ZNF827 168.036319777283 251.65044168003 289.25391828279  
125.114613377133 280.446302631438 280.034472186873 372.02379581293  
250.866560791828 259.906934432819 464.99944459917 612.014486689487  
279.125471103327

ZNF828 343.304521604977 281.774690337889 218.531478946522  
230.554867472663 454.701322158431 353.751797948675 414.062259640915

148.027258506301 287.689260887067 200.698372627272 229.745018977185  
173.434174644937  
ZNF829 40.9558083259517 40.3180310664156 42.2054656733216  
41.1523487516364 40.2062851265091 43.7630587657205 42.106632087165  
41.9890955144165 40.3316153483289 44.3124153157801 41.400731343457  
41.9430737035925  
ZNF83 85.5362566454799 102.490465676619 98.1433318215702 82.2766822827861  
54.3116862772198 66.8632294055679 76.3583555666815 101.681822254799  
82.7229468743536 151.686513723244 107.971806573919 150.46866649779  
ZNF831 44.9370339275041 47.015085768072 43.4709415392696  
65.4068498877665 38.7004513165111 39.8785903668981 40.4941260038116  
46.4329203134841 39.7537274655115 41.0608773166058 40.8681871019812  
34.806104801006  
ZNF833 44.5282181324797 41.554942319225 38.2280071951674  
41.4273122914951 39.0564222526273 39.4953494583071 39.0458123429605  
44.9977782988116 37.7384958256497 39.5637454855233 38.1835938174625  
42.4607795638552  
ZNF835 40.0557788909923 36.3110701990588 44.4311655729487  
47.481302504066 45.1137938810047 44.1737502492846 35.7055410599146  
38.079222289614 38.2215591930186 33.2987269789328 39.153226699662  
42.0424641526302  
ZNF839 63.4610447573417 61.4800543360853 77.0301627655229  
49.9014504704021 63.1443731864055 65.1291617069903 67.5206810636627  
56.2441895183416 74.3394153125605 65.2361525412756 63.0763092522598  
60.6653636336244  
ZNF846 40.4639532172338 50.2696827764943 54.3554233228353  
41.1886975241176 40.8873907150245 38.9378717994178 46.1634822993009  
40.1474543172332 50.6750785584772 40.4136535208406 46.0095710163378  
46.1592873342534  
ZNF85 39.0620487644635 41.159706131351 33.7737772393677 38.745552403895  
35.6434124419782 37.9003288112261 42.4939802311136 35.4526946152955  
41.3803269429468 36.6893251782922 38.4689132737495 34.0382693188794  
ZNF862 43.5710871617107 39.5050383901884 50.1860191642359  
50.8567345921473 41.7929491793697 39.3841861812262 48.3411413510851  
38.4540849632254 44.7058233759912 46.6598879466655 45.0589947942306  
44.0451487108213  
ZNF90 41.3387790895716 41.6466169548846 43.7630587657205 44.6905691366696  
43.2484996523549 43.6670755115848 39.5496902678788 41.3506832276112  
46.1101825640108 42.2614524730856 43.3085358214154 42.8864415494484  
ZNF91 96.4971762611189 248.058310353348 145.509901200987 87.4850071876743  
154.945533851823 147.424598105182 372.982648892131 309.344766670365  
94.9831937714438 199.123340814127 341.142651038591 327.786619565391  
ZNF92 44.3355304829989 41.3177250076876 43.0697338561114 44.0451487108213  
40.8270141118472 37.9951997351435 41.6550823405646 39.9576138799997  
43.4290452504928 46.7646877499666 46.5908542339034 42.7303139017786  
ZNF93 71.0340758556049 67.4280399954084 60.5548506034677 72.5752072120178  
53.0063130674306 64.388373296782 69.4214927857472 76.7254010150417  
72.544822622412 60.5548506034677 68.8058577447202 69.64983895075  
ZNF98 39.7576136507593 41.8073910693411 42.640829914102 54.4586176399381  
45.1137938810047 39.9397419279057 47.2927436772465 43.2551508830106  
40.8970401536578 46.6598879466655 39.6403089864678 44.7401523707775  
ZNF99 44.8914371498528 42.6022652963326 41.9666541498638 43.6726153508978  
40.5710637884029 44.6524308640784 42.4939802311136 44.2159020605784  
43.9450023643394 46.0119912782855 44.2142581488029 45.7562276914441

ZNFX1 254.756894822368 252.535061916875 227.817928402227 331.533249823589  
109.503117647487 239.466489599238 175.165302282522 231.154569340492  
286.11425202743 235.047133588022 276.939964364659 167.639975497722  
ZNHIT1 587.88126282119 463.527266972118 662.848386826617  
508.081726674689 609.243908604949 579.260404515899 543.268021785502  
814.294297312057 920.504890206997 608.886783362316 506.75912743556  
477.924466983414  
ZNHIT2 81.537796828766 77.5737637002275 64.9839099669442  
51.3851157261451 158.071355628454 68.7342341724306 104.341160312305  
80.2680308979464 90.5553202429233 75.7140064167134 71.2370255410834  
68.4278345554565  
ZNHIT3 312.045709918301 225.559405596065 230.879083362388  
225.35760689842 303.818507395434 238.647490689325 422.702925141293  
263.096895937991 342.058245939495 203.82788889213 185.312851727212  
264.718875269207  
ZNRD1 120.533617429145 134.981483569602 151.795609904857 136.504157082236  
285.187681119318 138.581471125405 129.2860308084 102.380096190518  
222.126944340681 110.422857502267 109.594402843796 188.457593309678  
ZNRD2 41.5421429082231 43.0227387991135 36.0306975524309 36.6501141438378  
38.745552403895 36.0306975524309 35.4623691645629 36.0306975524309  
43.1805016690297 34.064698871541 44.6286581923295 45.0035308952466  
ZNRD3 41.6354649482853 43.2649781354792 38.6005272730664 38.0958223740111  
35.4484652445078 39.4953494583071 43.1931731665131 46.1673159982664  
46.4164127487052 40.7063426028871 39.9899430628542 40.1700117452801  
ZNRD4 66.6547247910487 70.7702047405718 57.2107492415265 40.7481155008596  
73.8251606025227 59.3618843678775 84.1780237893807 68.1311562787361  
65.0217598379984 75.9037617394486 68.878562323012 63.7744603935682  
ZNRD5 38.385865183581 44.5152708955623 42.4580504587581 38.4208429103799  
37.1565984182084 41.8613406887824 47.4439407315335 35.3608605269276  
43.4656637536244 44.4652605017595 46.1673159982664 38.9496515344837  
ZP1 44.8914371498528 44.1239711172417 43.7630587657205 49.7350276169552  
49.0828761839116 50.5148383400703 47.8947595316832 44.797320243931  
44.8997235283254 42.2614524730856 42.0750889188255 41.6550823405646  
ZP2 40.2543341073001 41.8073910693411 43.401782064778 41.8778873678551  
38.745552403895 44.0804700754786 34.6720534245631 46.3685439301234  
41.7627910693483 42.5664883002833 40.3452320167286 39.4490233720848  
ZP3 70.7805103907761 63.4570909617664 85.6763929745253 132.863834626147  
93.8968899420039 101.857595722021 81.8569832022381 108.299918384297  
94.2987879109502 128.414712393554 164.312946712409 126.253578620746  
ZP4 39.266565827316 36.4002279956519 30.7315474127249 38.0958223740111  
36.7356360093603 33.2552842693684 39.0458123429605 37.0390589468421  
35.4332080966594 40.4136535208406 32.406093465115 33.8196020406676  
ZPBP 43.2724556187214 37.5469247328848 37.3687900733549 40.4359177791566  
37.7576900881741 36.2015763253919 40.3302268293707 41.6466169548846  
37.6383530120621 40.1179210534118 37.9946685306274 37.7526485343328  
ZPBP2 39.8299340037009 39.5478234680338 37.7384958256497 40.6857324478814  
37.2567512265363 39.7617316032829 41.8887298788489 39.3181312104037  
39.7537274655115 40.1179210534118 39.0775870687758 39.2780515621926  
ZPLD1 44.3355304829989 38.0226905622357 39.6451483836089 41.6564075217517  
34.7018263647985 38.5252456306656 40.3302268293707 38.2782436497441  
41.6616444147804 40.4136535208406 40.0766543123257 39.4490233720848  
ZPRANB1 74.6776631832355 81.4931910857436 83.5149142053137  
112.585860083115 78.0077300979911 117.907440794926 94.4618437533343

80.3860547572521 77.9028721785469 69.9928775398776 81.4702220063796  
97.9497090233081  
ZRANB2 240.6614822416 203.729732499418 257.662291702982  
173.343091136741 285.56460901579 217.821858857631 175.550329937952  
234.675357616705 109.828760284519 265.026710493466 206.337508331566  
255.884444464408  
ZRANB3 42.6036491382658 40.2093230376545 43.1931731665131  
43.4877740913713 43.844855336215 40.5805725503899 43.4885245598939  
46.0633179231318 42.38204124321 41.8613406887824 41.9083581529276  
43.4709415392696  
ZSCAN1 33.4902421268456 33.8237407699472 41.785676764591  
37.0732977341185 39.2608760193011 37.4782441311626 33.3231576795423  
35.7973685350741 36.6312676076142 37.920964499903 41.0050831223107  
37.9607839934735  
ZSCAN10 48.9906383294199 38.5252456306656 39.2707964550441  
43.4410741327254 37.5556299264699 33.5578650644246 39.0458123429605  
37.5511560880902 35.1155486926999 30.7315474127249 35.2339574411711  
35.2448979801094  
ZSCAN12 50.8388984085636 63.5222607845861 49.5424425850549  
46.8954576545929 43.3332476888305 51.294537308199 65.0031119608637  
48.87875862356 48.9931786790166 68.2708120569221 66.737740728688  
51.4308501933893  
ZSCAN16 195.893183546434 107.094663242259 85.5839487225537  
71.0211264570699 132.684895918889 74.0995052892511 247.327094930096  
359.241360412129 107.961407367823 110.909109947659 80.3500323413132  
96.1710806345503  
ZSCAN18 327.912730756303 543.640122689871 323.095468495074  
165.958820888591 299.706257810523 928.230419226078 376.931257615162  
222.088653823382 410.058119360034 663.904584382358 700.477686061791  
600.34379987143  
ZSCAN2 90.3439862484238 71.7215348945466 49.3000844711116  
51.8610060995363 80.0312512203372 53.4820309182878 90.6347108049639  
74.0093517743852 61.7237308816752 53.5498255316009 56.9628808664342  
54.0104259381604  
ZSCAN20 50.2203578628217 40.716553247236 44.696023817801  
45.1944222548351 45.8051846088552 43.1826328292558 46.3057385979341  
42.8482181313226 45.1899271235974 41.4397539024976 45.5707650534259  
43.9541718254769  
ZSCAN21 73.2842501003097 62.801431502597 87.2316853416374  
63.7909104347097 69.8804970538895 87.0685571351947 59.1774824918359  
63.5295088521896 79.3861418060845 81.8426140611297 86.8330533522204  
91.6328359149182  
ZSCAN22 41.6354649482853 44.6918600441328 45.063792968927  
40.8681871019812 38.4540849632254 36.8059561571675 38.941855825269  
43.5544347011646 37.9273653326866 43.2988017098387 38.8507804383261  
38.5279745308203  
ZSCAN29 48.8333989709933 43.4396866157171 48.2883694323339  
44.6905691366696 76.5375674421131 41.554942319225 48.1747307200218  
85.7732262204681 44.619512785899 45.1569741609597 47.9942520395434  
52.0359304386476  
ZSCAN4 38.957687788868 49.3581578587582 81.7434024567356  
41.8778873678551 43.5544347011646 41.9543948167375 48.1747307200218  
38.5457716679071 47.0804681460898 105.009081898873 62.1796792097014  
109.594402843796

ZSCAN5A 55.9249770393176 50.7487159427973 48.8941062980393  
57.8277957325085 72.4060089486729 53.9517841438975 59.3549213146532  
53.4109882045447 52.6561576154021 60.2877434874622 59.0537479001842  
53.4735821194294

ZSWIM1 216.488139476342 103.808640431626 99.0596863442346  
107.799236230743 164.205608279417 96.2490896573253 156.311985997533  
242.58992925232 144.799432299339 193.951097560903 147.579873410455  
140.226992517573

ZSWIM2 38.957687788868 36.3110701990588 41.3366779545815  
44.7980740332174 41.8806343997257 43.1826328292558 46.1634822993009  
46.8954576545929 46.9739160257217 45.5776159432079 38.079222289614  
40.6614700944853

ZSWIM3 46.5838589292963 48.8584917918986 46.1312573416873  
45.3882138838137 49.0145368354835 43.1358833499227 47.1345949868029  
42.3207901205146 46.5589382458154 43.7927887844247 46.3750226052348  
44.1218908281261

ZSWIM4 258.446095955014 162.721587349434 181.2179249806  
162.000275136397 137.605565493336 73.5743059777365 118.816772641597  
207.464632062656 163.931827466775 121.45753287862 101.804757613639  
133.344625514809

ZSWIM5 85.2893380711323 43.5873188565519 51.7138050344355  
44.550322123994 53.9074374788981 64.6835308827804 68.1125016199524  
95.491982090349 92.4350913779886 117.746495007818 91.8414653633828  
73.7335870746827

ZSWIM6 208.915145509698 170.682363891841 123.233259665079  
317.777971035617 108.251353392321 138.12608134713 103.316970096472  
132.007307754378 174.021676013865 191.482692108417 180.288784077653  
188.670053901101

ZUFSP 109.738537924214 91.1271533616476 76.1493261430901 89.6115806694241  
59.1948983423381 68.839885767937 69.0037087543684 71.1607965028029  
66.7008819035152 76.7137782332689 75.5799609581534 87.5074297754031

ZW10 201.006934353364 166.535245140901 156.433762355183 173.536155357688  
247.134338953977 152.17335005192 263.170107025525 170.750057881363  
190.27040993548 153.177725521199 167.05554959607 161.630831921556

ZWILCH 83.877343750194 110.146992754585 66.5774376622485  
78.0870333663165 173.236617176892 66.1541420734416 115.93159653774  
129.101365145456 132.931052537195 67.0384187945533 60.8976148193383  
67.7280831060202

ZWINT 51.6869155634183 73.8800799416166 68.8529879402902 47.2862299990937  
86.3533120291957 46.9354126752815 49.0558421082416 68.4295083257008  
78.8595005348182 40.0633222311529 40.764340574916 44.4475838947656

ZXDA 42.8036731479932 44.6396687814297 43.2641830353072 42.7652805392214  
43.1839109702714 43.4169280694961 47.5963750520409 44.6725973326224  
45.4213835673882 45.3877968219772 45.2765291940328 47.087835967892

ZXDB 54.6235981131919 53.7332797903102 63.5107036952143 50.7046706880325  
44.5668141895992 57.4777075615651 57.1070449050465 43.4544762830742  
65.4784797364469 61.9882398986333 62.0404348860702 67.7662831916293

ZXDC 65.4045346634146 61.9459245072385 60.3155766445629 68.3157692917711  
92.8131698915896 52.6747142992864 67.1299518044849 57.50915811428  
55.3677549981102 82.3488166506716 69.5544840164738 67.0636485288398

ZYG11A 42.3620028137457 40.0984333134909 40.148780650831  
39.1706564265495 42.1650127805175 38.4741160538511 43.4885245598939  
40.2819379659218 41.7233690251839 40.8970401536578 39.9586075662602  
40.6273137602368

|        |                  |                  |                  |                  |
|--------|------------------|------------------|------------------|------------------|
| ZYG11B | 706.087945508248 | 358.498678171092 | 294.220232101389 |                  |
|        | 318.234214341679 | 366.716775127375 | 522.49156295512  | 479.199214976757 |
|        | 867.856842601788 | 404.524605612471 | 765.145138238955 | 617.808073077341 |
|        | 585.771656887036 |                  |                  |                  |
| ZYX    | 451.290681710534 | 342.387761195952 | 492.902027204364 | 696.529869192906 |
|        | 266.07996221256  | 746.847753035399 | 269.438510636306 | 197.070092523652 |
|        | 468.573956652904 | 404.265659915313 | 480.902561112949 | 477.023373302787 |
| ZZEF1  | 92.2649985233782 | 138.314834472957 | 96.4740168904128 | 116.547937420457 |
|        | 100.645556491457 | 123.176449895397 | 130.890690835631 | 99.2432911346944 |
|        | 74.3394153125605 | 112.17141283151  | 109.594402843796 | 79.8331445290301 |
| ZZZ3   | 204.992039590717 | 166.951916348418 | 155.693953208351 | 134.646159826262 |
|        | 167.229755109155 | 173.819948756127 | 173.035987237848 | 206.41879845205  |
|        | 89.4111455826308 | 207.833867050257 | 183.77850568836  | 199.57367025082  |
